# Supplementary material for: Knockout of glutathione peroxidase 5 down-regulates the piRNAs in the caput epididymidis of aged mice
Source: PubMed Central journal article supplement — Asian J Androl. 2020 Apr 7;22(6):590–601. doi: 10.4103/aja.aja_3_20 (PMC7705982; doi:10.4103/aja.aja_3_20), 2020-04-07
Supplement: AJA-22-590_Suppl1.pdf [file AJA-22-590_Suppl1.pdf]

**Primers for qPCR Forward (5' to 3')**

Actb CAGCCTTCCTTCTTGGGTAT  
 Atp5b AGAGGTGTCTGCCTTATTGG  
 Ddx4 GAGGGGGAAGAGGCAGTTTC  
 Gpx5 TCTTGAAGCGTTCTTGTCTT  
 Mael TTCGATTCCATTGCCAGGCT  
 Piwil1 GACCAGAATCCAAAGAGCAC  
 Piwil2 TGGGAGACTGAAGCAGGAGT  
 Piwil4 AACCGGTGGTACAGACACAA  
 Spag11a GTTACTCTTTGCTGTCTTCTTCTGC  
 Tdrd1 CTGTCCCCCGGGAGTTACTA  
 Zfp106 GAAGTCCTGGAAGTCACAAA

**Reverse (5' to 3')**

TGGCATAGAGGTCTTTACGG  
 TGATCCTTTCCTGCATTGTG  
 TTCCAGACCCTGTTTGAGC  
 TATTGGCTCCCAGAAGGTAT  
 TTGGGTGTCACACTGTTGCT  
 CCTGGTTGTATTGCTTCCTG  
 AGGCTTTGGTTTTGTTGTGG  
 CGAGCCGCACTCTGTTACAC  
 GGAGCAGATATCCCCTTTTCTCT  
 TCAACGGCACAGGTGAGTAC  
 TTCAGAAGTATCAATGGCAAC

piR-125360 AATCGGCGCTCCAGATTA AAAA  
 piR-1330 AACAAAGCTGGGAATACCGGG  
 piR-14721 GTATATAGTGACCGGGAGCTGT  
 piR-17753 AACAAAGTCCAACCGAAGAAG  
 piR-20751 AAGTATTCTGGCAAACCAAGGTG  
 piR-22206 CAATATTGGGGGGGCCCAAGT

CAGTGCAGGGTCCGAGGT  
 CAGTGCAGGGTCCGAGGT  
 CAGTGCAGGGTCCGAGGT  
 CAGTGCAGGGTCCGAGGT  
 CAGTGCAGGGTCCGAGGT  
 CAGTGCAGGGTCCGAGGT

**Primers for RT (5' to 3')**

piR-125360 GTCGTATCCAGTGCAGGGTCCGAGGTATTCGCACTGGATACGACAGCTCT  
 piR-1330 GTCGTATCCAGTGCAGGGTCCGAGGTATTCGCACTGGATACGACAAGCCT  
 piR-14721 GTCGTATCCAGTGCAGGGTCCGAGGTATTCGCACTGGATACGACGCAAAG  
 piR-17753 GTCGTATCCAGTGCAGGGTCCGAGGTATTCGCACTGGATACGACACATAG  
 piR-20751 GTCGTATCCAGTGCAGGGTCCGAGGTATTCGCACTGGATACGACACCTAA  
 piR-22206 GTCGTATCCAGTGCAGGGTCCGAGGTATTCGCACTGGATACGACTGGGC
