# Supplementary material for: Knockout of glutathione peroxidase 5 down-regulates the piRNAs in the caput epididymidis of aged mice
Source: PubMed Central journal article supplement — Asian J Androl. 2020 Apr 7;22(6):590–601. doi: 10.4103/aja.aja_3_20 (PMC7705982; doi:10.4103/aja.aja_3_20), 2020-04-07
Supplement: AJA-22-590_Suppl2.pdf [file AJA-22-590_Suppl2.pdf]

| Gene Symbol  | Gene Name     | GFOLD    | E-FDR | Log2FC   | RPKM     |               | Change in KO |
|--------------|---------------|----------|-------|----------|----------|---------------|--------------|
|              |               |          |       |          | WT Caput | Gpx5 KO Caput |              |
| NM_027939    | 1700006A11Rik | -7.17377 | 1     | -8.90851 | 36.5159  | 0.0362032     | Down         |
| NM_009618    | Adam2         | -7.00094 | 1     | -7.77894 | 97.3679  | 0.393992      | Down         |
| NM_172568    | March10       | -6.91972 | 1     | -7.79118 | 70.6225  | 0.280251      | Down         |
| NM_021311    | Piwil1        | -6.89689 | 1     | -8.50942 | 20.8867  | 0.0364052     | Down         |
| NM_175296    | Mael          | -6.89528 | 1     | -7.40461 | 305.774  | 1.67172       | Down         |
| NM_001177437 | 1700016M24Rik | -6.77883 | 1     | -7.32338 | 108.889  | 0.627084      | Down         |
| NM_029946    | Efcab6        | -6.76656 | 1     | -7.49304 | 46.068   | 0.229181      | Down         |
| NM_013811    | Dnahc8        | -6.75078 | 1     | -7.15477 | 44.947   | 0.295375      | Down         |
| NM_027943    | Pdilt         | -6.73561 | 1     | -8.24918 | 42.8779  | 0.100689      | Down         |
| NM_177191    | Sycp2         | -6.69294 | 1     | -7.30231 | 52.3157  | 0.302969      | Down         |
| NM_001161366 | Tdrd6         | -6.68226 | 1     | -7.09936 | 83.4598  | 0.569286      | Down         |
| NM_009650    | Akap3         | -6.62092 | 1     | -7.11841 | 129.594  | 0.865226      | Down         |
| NM_182785    | Lypd4         | -6.6072  | 1     | -7.38599 | 172.737  | 0.917875      | Down         |
| NM_001163612 | 1700061J05Rik | -6.58439 | 1     | -7.33426 | 169.706  | 0.938853      | Down         |
| NM_001143765 | Syce1         | -6.58406 | 1     | -7.5312  | 114.455  | 0.540151      | Down         |
| NM_009446    | Tuba3a        | -6.57187 | 1     | -7.02831 | 306.575  | 2.18846       | Down         |
| NM_028547    | Kif2b         | -6.56122 | 1     | -7.13112 | 135.026  | 0.885527      | Down         |
| NM_053156    | Allc          | -6.55724 | 1     | -7.26456 | 142.918  | 0.835922      | Down         |
| NM_009449    | Tuba3b        | -6.55391 | 1     | -6.98557 | 323.203  | 2.38234       | Down         |
| NM_177791    | Kctd19        | -6.54511 | 1     | -7.12421 | 97.2663  | 0.640144      | Down         |
| NM_029267    | Boll          | -6.5345  | 1     | -8.14824 | 62.1294  | 0.13913       | Down         |
| NM_001033267 | Qrich2        | -6.52964 | 1     | -7.16267 | 114.919  | 0.730528      | Down         |
| NM_001163836 | Pabpc6        | -6.52069 | 1     | -7.15375 | 76.9707  | 0.492332      | Down         |
| NR_003643    | 1700123L14Rik | -6.49144 | 1     | -7.05273 | 176.34   | 1.22251       | Down         |
| NM_010293    | Gykl1         | -6.45934 | 1     | -7.10531 | 119.949  | 0.791812      | Down         |
| NM_013580    | Ldhc          | -6.45738 | 1     | -6.78555 | 603.296  | 5.15141       | Down         |
| NM_145746    | Odf4          | -6.44919 | 1     | -7.8805  | 79.9899  | 0.258706      | Down         |
| NM_010294    | Gk2           | -6.43979 | 1     | -6.96296 | 178.154  | 1.32083       | Down         |
| NM_025721    | Spesp1        | -6.42618 | 1     | -7.63285 | 44.6886  | 0.190617      | Down         |
| NM_009619    | Adam3         | -6.42387 | 1     | -6.7642  | 266.465  | 2.30728       | Down         |
| NM_177719    | Morc2b        | -6.41407 | 1     | -7.04733 | 61.822   | 0.425715      | Down         |
| NM_011598    | Fabp9         | -6.38112 | 1     | -6.82082 | 743.153  | 6.13598       | Down         |
| NM_001039049 | Cox8c         | -6.37682 | 1     | -7.99118 | 120.791  | 0.301643      | Down         |
| NM_021898    | Tsga8         | -6.3733  | 1     | -7.98768 | 53.5049  | 0.133938      | Down         |
| NM_001145885 | Ddx4          | -6.37299 | 1     | -6.91819 | 102.423  | 0.781158      | Down         |
| NM_028550    | 1700074P13Rik | -6.34655 | 1     | -7.02108 | 118.905  | 0.82819       | Down         |
| NM_183293    | Ccdc83        | -6.33569 | 1     | -8.0735  | 28.9931  | 0.0513159     | Down         |
| NM_027022    | Cmtm2a        | -6.33054 | 1     | -6.85391 | 281.601  | 2.25175       | Down         |
| NM_177677    | Dnajc5g       | -6.32321 | 1     | -8.06107 | 25.728   | 0.0459315     | Down         |
| NM_001033304 | 5330417C22Rik | -6.31749 | 1     | -7.56914 | 34.4274  | 0.151093      | Down         |
| NM_144827    | Spata20       | -6.3164  | 1     | -6.72409 | 184.744  | 1.63602       | Down         |
| NM_026094    | Atp8b3        | -6.30496 | 1     | -6.57701 | 230.14   | 2.27856       | Down         |
| NM_027041    | 1700003M02Rik | -6.30156 | 1     | -6.82497 | 174.354  | 1.42243       | Down         |
| NM_028513    | Actr2         | -6.30083 | 1     | -6.93434 | 147.275  | 1.09681       | Down         |
| NR_015613    | 1700029M20Rik | -6.29904 | 1     | -7.0786  | 51.5817  | 0.339208      | Down         |
| NM_025724    | 4921510H08Rik | -6.28988 | 1     | -7.16299 | 75.1773  | 0.461184      | Down         |
| NM_025271    | Actf7b        | -6.27933 | 1     | -6.93936 | 136.737  | 1.01043       | Down         |
| NM_001033176 | 1700039E15Rik | -6.27627 | 1     | -7.79153 | 38.5484  | 0.124349      | Down         |
| NM_013734    | Atp1a4        | -6.26749 | 1     | -6.69956 | 119.188  | 1.0712        | Down         |
| NM_030047    | 4930458L03Rik | -6.26564 | 1     | -7.8805  | 16.4693  | 0.0444114     | Down         |
| NM_177759    | Ccdc60        | -6.25844 | 1     | -6.91852 | 74.1736  | 0.556088      | Down         |
| NM_029298    | 1700011E24Rik | -6.25816 | 1     | -7.51003 | 129.759  | 0.593314      | Down         |
| NM_027960    | Dpep3         | -6.25748 | 1     | -7.61973 | 52.902   | 0.213537      | Down         |
| NM_009407    | Tnp1          | -6.24399 | 1     | -6.51338 | 2328.66  | 24.0988       | Down         |
| NM_029289    | Cypt12        | -6.24284 | 1     | -6.97048 | 315.741  | 2.25669       | Down         |
| NM_027036    | Hmgb4         | -6.22814 | 1     | -6.9789  | 222.426  | 1.57436       | Down         |
| NR_033188    | 4931409K22Rik | -6.22529 | 1     | -7.84034 | 16.3867  | 0.0454373     | Down         |
| NM_001167746 | Dnahc17       | -6.2234  | 1     | -6.74697 | 19.037   | 0.163939      | Down         |
| NM_028157    | Fam75d3       | -6.21611 | 1     | -7.73164 | 14.9749  | 0.0503561     | Down         |
| NM_001034902 | Gm5878        | -6.21138 | 1     | -7.72692 | 13.7495  | 0.0463866     | Down         |
| NM_028843    | lqcf1         | -6.21111 | 1     | -7.94954 | 58.7931  | 0.113414      | Down         |
| NM_010377    | Hist1h1t      | -6.21015 | 1     | -6.96096 | 164.757  | 1.18077       | Down         |
| NR_038145    | 1700008K24Rik | -6.20899 | 1     | -6.89972 | 249.31   | 1.88373       | Down         |
| NM_001033338 | Rimbp3        | -6.20245 | 1     | -6.7643  | 42.0446  | 0.356009      | Down         |
| NM_027582    | Akr1cl        | -6.20187 | 1     | -7.71745 | 46.874   | 0.159182      | Down         |
| NM_001166475 | 4930407I10Rik | -6.20048 | 1     | -6.8607  | 39.3729  | 0.307259      | Down         |
| NM_011516    | Sycp1         | -6.19728 | 1     | -6.97714 | 41.4467  | 0.292428      | Down         |
| NM_028797    | Gtsf1         | -6.19318 | 1     | -7.23969 | 173.557  | 0.994335      | Down         |
| NM_019943    | Papalb        | -6.18488 | 1     | -6.73046 | 109.624  | 0.952298      | Down         |
| NM_001001177 | BC051142      | -6.17993 | 1     | -6.82653 | 99.074   | 0.793479      | Down         |
| NM_019981    | Tex101        | -6.17209 | 1     | -7.60451 | 69.5607  | 0.272452      | Down         |
| NM_199019    | 4933407P14Rik | -6.17097 | 1     | -7.04446 | 58.1349  | 0.387187      | Down         |
| NM_013564    | Insl3         | -6.16236 | 1     | -7.03589 | 219.052  | 1.46762       | Down         |
| NM_199034    | 4922502D21Rik | -6.15738 | 1     | -6.52707 | 328.616  | 3.34658       | Down         |

|              |               |          |   |          |         |           |      |
|--------------|---------------|----------|---|----------|---------|-----------|------|
| NM_007827    | Daf2          | -6.1552  | 1 | -7.1037  | 93.9591 | 0.596451  | Down |
| NM_026630    | Gtsf1l        | -6.14544 | 1 | -7.09397 | 140.415 | 0.897387  | Down |
| NM_007593    | Cetn1         | -6.14252 | 1 | -6.78921 | 174.531 | 1.43445   | Down |
| NM_175658    | Hist1h2aa     | -6.13884 | 1 | -7.87767 | 90.7795 | 0.184079  | Down |
| NM_001004025 | Ppp3r2        | -6.13504 | 1 | -6.71496 | 74.2924 | 0.649366  | Down |
| NM_001161773 | 4930544G11Rik | -6.13235 | 1 | -7.17909 | 83.2068 | 0.497167  | Down |
| NM_013694    | Tnp2          | -6.13154 | 1 | -6.39499 | 1742.32 | 19.5794   | Down |
| NM_183199    | Usp44         | -6.12878 | 1 | -7.5614  | 24.1536 | 0.0974759 | Down |
| NM_008579    | Meig1         | -6.1109  | 1 | -6.48794 | 680.641 | 7.11809   | Down |
| NM_026208    | 1700019N19Rik | -6.10923 | 1 | -7.2776  | 126.701 | 0.70002   | Down |
| NM_028654    | 4930404H21Rik | -6.10763 | 1 | -7.72325 | 52.1745 | 0.15692   | Down |
| NM_025585    | 1700029F12Rik | -6.10477 | 1 | -6.83279 | 129.5   | 1.01831   | Down |
| NM_001033434 | Gm884         | -6.08117 | 1 | -7.38485 | 19.2661 | 0.0941315 | Down |
| NM_027304    | H1fnt         | -6.07968 | 1 | -6.67956 | 151.527 | 1.35353   | Down |
| NM_172515    | Zbbx          | -6.07163 | 1 | -6.67153 | 82.6343 | 0.742256  | Down |
| NM_013637    | Prm1          | -6.06217 | 1 | -6.33826 | 2089.74 | 24.4089   | Down |
| NM_023508    | Pdcl2         | -6.05021 | 1 | -6.59609 | 208.954 | 1.99241   | Down |
| NM_054066    | Plcz1         | -6.02714 | 1 | -6.70249 | 71.9607 | 0.625128  | Down |
| NM_027660    | Tekt3         | -6.02255 | 1 | -7.53899 | 32.2215 | 0.123849  | Down |
| NM_029294    | Prps1l1       | -6.02249 | 1 | -7.06967 | 66.4495 | 0.428347  | Down |
| NM_007401    | Adam5         | -6.02165 | 1 | -6.33656 | 227.083 | 2.6494    | Down |
| NM_175200    | Als2cr11      | -6.0207  | 1 | -6.69607 | 73.3558 | 0.640088  | Down |
| NM_027665    | Adam30        | -6.0205  | 1 | -7.63657 | 19.0313 | 0.0607883 | Down |
| NM_019938    | Pmfbp1        | -6.01988 | 1 | -6.89393 | 34.2927 | 0.253529  | Down |
| NM_001166207 | Dpy19l2       | -6.01817 | 1 | -6.76955 | 38.239  | 0.312951  | Down |
| NM_023816    | Ankrd36       | -6.01663 | 1 | -6.76802 | 29.2676 | 0.239783  | Down |
| NM_001167593 | Gm4934        | -6.01125 | 1 | -6.76266 | 30.5894 | 0.251545  | Down |
| NM_009340    | Tcp10a        | -6.00924 | 1 | -6.62004 | 101.192 | 0.940493  | Down |
| NM_177867    | Spata21       | -5.99861 | 1 | -6.65936 | 63.6749 | 0.571357  | Down |
| NM_029599    | Sun5          | -5.99512 | 1 | -7.73477 | 27.7565 | 0.0621567 | Down |
| NM_027669    | Sept12        | -5.98748 | 1 | -6.86166 | 44.2345 | 0.33443   | Down |
| NM_027599    | Lpcat2b       | -5.98592 | 1 | -6.93509 | 39.7673 | 0.283759  | Down |
| NM_017379    | Tuba8         | -5.98564 | 1 | -7.19398 | 69.3523 | 0.401067  | Down |
| NM_011033    | Pabpc2        | -5.9818  | 1 | -6.48645 | 99.338  | 1.02717   | Down |
| NM_001002787 | Ccin          | -5.97678 | 1 | -6.79647 | 57.7799 | 0.459745  | Down |
| NM_028942    | Sloco6c1      | -5.97586 | 1 | -6.92506 | 45.1729 | 0.324579  | Down |
| NM_153397    | Adam32        | -5.97569 | 1 | -6.43773 | 122.867 | 1.32023   | Down |
| NM_172912    | Abcc12        | -5.97183 | 1 | -7.22488 | 19.9917 | 0.111403  | Down |
| NM_009989    | Cyct          | -5.96971 | 1 | -7.70951 | 48.3147 | 0.110109  | Down |
| NM_013932    | Ddx25         | -5.96277 | 1 | -6.49391 | 137.93  | 1.41439   | Down |
| NM_001145660 | Rfx8          | -5.9609  | 1 | -7.57731 | 21.57   | 0.071791  | Down |
| NR_033583    | Spn-ps        | -5.96005 | 1 | -7.69993 | 38.68   | 0.0887404 | Down |
| NM_001127576 | Gm1564        | -5.95362 | 1 | -7.12264 | 22.9668 | 0.14129   | Down |
| NM_025731    | Hrasls5       | -5.95251 | 1 | -6.77228 | 110.481 | 0.893949  | Down |
| NM_026449    | Galntl5       | -5.95041 | 1 | -7.20356 | 55.5713 | 0.314282  | Down |
| NM_009341    | Tcp10c        | -5.94467 | 1 | -6.54491 | 88.6265 | 0.86914   | Down |
| NM_199013    | Irgc1         | -5.94285 | 1 | -6.43021 | 145.59  | 1.56834   | Down |
| NM_010214    | Fhl4          | -5.94145 | 1 | -6.14749 | 504.556 | 6.74889   | Down |
| NM_027661    | Hsfy2         | -5.93912 | 1 | -7.456   | 37.7027 | 0.153509  | Down |
| NM_001167578 | Gm9880        | -5.93814 | 1 | -6.46934 | 89.8454 | 0.937145  | Down |
| NM_009611    | Actl7a        | -5.92538 | 1 | -6.63434 | 89.6184 | 0.811467  | Down |
| NM_027046    | Ccdc54        | -5.92431 | 1 | -6.51442 | 143.58  | 1.44025   | Down |
| NM_080510    | Trim69        | -5.92184 | 1 | -7.43881 | 29.7325 | 0.12251   | Down |
| NM_029430    | Ttc23l        | -5.91684 | 1 | -7.35049 | 31.8328 | 0.148713  | Down |
| NM_001024841 | Gm128         | -5.91367 | 1 | -6.58936 | 98.7554 | 0.927911  | Down |
| NM_183282    | Act9          | -5.91235 | 1 | -6.50249 | 134.804 | 1.36345   | Down |
| NM_027616    | 4921528l01Rik | -5.91002 | 1 | -7.2145  | 23.4887 | 0.129159  | Down |
| NM_175349    | Ldhal6b       | -5.90552 | 1 | -6.35016 | 212.841 | 2.43443   | Down |
| NM_013849    | Dusp13        | -5.9052  | 1 | -7.11389 | 87.8822 | 0.537257  | Down |
| NM_001162928 | Pom12l12      | -5.90144 | 1 | -6.68229 | 24.5836 | 0.212804  | Down |
| NM_181591    | Txndc3        | -5.88873 | 1 | -6.93649 | 48.6548 | 0.343991  | Down |
| NM_026317    | Prss37        | -5.88674 | 1 | -6.93451 | 96.6666 | 0.684375  | Down |
| NM_172430    | Sphkap        | -5.88355 | 1 | -7.09235 | 14.2126 | 0.0881953 | Down |
| NM_175663    | Hist1h2ba     | -5.88147 | 1 | -6.42012 | 554.821 | 5.98258   | Down |
| NM_177279    | 4732415M23Rik | -5.88095 | 1 | -6.75556 | 204.37  | 1.66311   | Down |
| NM_026105    | 1700093K21Rik | -5.87369 | 1 | -7.08254 | 91.7415 | 0.573181  | Down |
| NM_001081312 | Tmco2         | -5.87042 | 1 | -6.74508 | 146.171 | 1.19818   | Down |
| NM_027174    | Col22a1       | -5.86871 | 1 | -6.91656 | 16.3428 | 0.117152  | Down |
| NM_009904    | Clgn          | -5.8685  | 1 | -6.74317 | 46.0744 | 0.378179  | Down |
| NM_009436    | Tssk2         | -5.86056 | 1 | -6.42323 | 139.838 | 1.49996   | Down |
| NM_001164139 | Spert         | -5.85833 | 1 | -6.38974 | 133.085 | 1.46694   | Down |
| NM_027058    | 1700017D01Rik | -5.85352 | 1 | -7.15828 | 63.0972 | 0.360759  | Down |
| NM_133711    | Spata4        | -5.83963 | 1 | -6.42031 | 171.035 | 1.83383   | Down |
| NM_029324    | 1700018C11Rik | -5.83924 | 1 | -7.2733  | 86.8305 | 0.427964  | Down |
| NM_138746    | Fam50b        | -5.83834 | 1 | -7.35579 | 37.5229 | 0.163782  | Down |
| NR_037991    | Gm2762        | -5.83327 | 1 | -7.13813 | 31.7626 | 0.184158  | Down |

|                |               |          |   |          |         |           |      |
|----------------|---------------|----------|---|----------|---------|-----------|------|
| NM_026461      | 1700129C05Rik | -5.82839 | 1 | -7.08213 | 76.5512 | 0.470981  | Down |
| NM_001037749   | Slc22a14      | -5.82759 | 1 | -6.57963 | 52.4758 | 0.489929  | Down |
| NM_001033547   | 4922505E12Rik | -5.82455 | 1 | -7.03363 | 43.2401 | 0.279478  | Down |
| NR_033613      | 1700001J11Rik | -5.82108 | 1 | -6.38386 | 76.5267 | 0.843573  | Down |
| NM_008811      | Pdha2         | -5.8206  | 1 | -6.69548 | 43.1729 | 0.36628   | Down |
| NM_026205      | Rnf151        | -5.81923 | 1 | -6.60039 | 92.3373 | 0.846022  | Down |
| NM_016668      | Bhmt          | -5.81688 | 1 | -7.12182 | 35.469  | 0.207989  | Down |
| NM_027634      | 4931431F19Rik | -5.81578 | 1 | -7.43304 | 20.4228 | 0.0751345 | Down |
| NM_001033669   | Fbxw10        | -5.81428 | 1 | -7.02342 | 27.0068 | 0.175797  | Down |
| NM_175517      | 4930412F15Rik | -5.81323 | 1 | -6.86134 | 54.6712 | 0.407209  | Down |
| NM_175033      | BC089491      | -5.80799 | 1 | -7.4253  | 31.9498 | 0.118174  | Down |
| NM_013821      | Hsd3b6        | -5.80521 | 1 | -7.32286 | 26.7633 | 0.119519  | Down |
| NM_029608      | 1700029J11Rik | -5.80521 | 1 | -7.32286 | 74.3105 | 0.331853  | Down |
| NM_027572      | Slc22a16      | -5.80496 | 1 | -6.97467 | 42.257  | 0.28806   | Down |
| NM_001201358   | 4921511M17Rik | -5.80345 | 1 | -7.54436 | 28.5429 | 0.0729583 | Down |
| NM_030036      | Gm15144       | -5.80345 | 1 | -7.54436 | 28.5429 | 0.0729583 | Down |
| NM_178254      | Tcf5          | -5.80254 | 1 | -6.4253  | 70.4508 | 0.748161  | Down |
| NM_026652      | 4930547C10Rik | -5.79535 | 1 | -6.9651  | 39.215  | 0.269104  | Down |
| NM_019784      | Tex21         | -5.79463 | 1 | -7.04854 | 37.3588 | 0.23527   | Down |
| NR_015490      | 4930558C23Rik | -5.79264 | 1 | -7.5336  | 37.9798 | 0.0978079 | Down |
| NM_009581      | Zp3r          | -5.79191 | 1 | -7.09699 | 35.4975 | 0.211773  | Down |
| NM_027063      | 1700013G24Rik | -5.79106 | 1 | -6.83928 | 91.6233 | 0.692963  | Down |
| NM_010021      | Dazl          | -5.79105 | 1 | -6.96082 | 31.909  | 0.219619  | Down |
| NM_031255      | Rsph6a        | -5.78987 | 1 | -7.22421 | 23.8913 | 0.121834  | Down |
| NM_029472      | Gstt4         | -5.78816 | 1 | -6.51722 | 121.872 | 1.19279   | Down |
| NR_003959      | Aldoat2       | -5.78574 | 1 | -6.56703 | 68.0557 | 0.638142  | Down |
| NM_029288      | Gm1973        | -5.77806 | 1 | -7.51914 | 27.793  | 0.0722971 | Down |
| NM_026338      | 4921517D21Rik | -5.76863 | 1 | -6.40356 | 36.7577 | 0.395543  | Down |
| NM_054103      | Stk33         | -5.7653  | 1 | -6.35586 | 69.6347 | 0.779685  | Down |
| NM_018792      | Hils1         | -5.76421 | 1 | -6.26939 | 277.634 | 3.33702   | Down |
| NM_026248      | 4930430A15Rik | -5.75659 | 1 | -6.63175 | 52.8574 | 0.468711  | Down |
| NM_001126487   | Heatr8        | -5.74964 | 1 | -7.00379 | 17.8001 | 0.115632  | Down |
| NM_011553      | Tcp10b        | -5.74728 | 1 | -6.45684 | 67.8286 | 0.69462   | Down |
| NM_033077      | D1Pas1        | -5.74648 | 1 | -6.69672 | 29.2051 | 0.245859  | Down |
| NM_176980      | Ankar         | -5.7411  | 1 | -6.49348 | 23.7593 | 0.235483  | Down |
| NM_172895      | Fam71e2       | -5.73831 | 1 | -6.4907  | 40.3731 | 0.400918  | Down |
| NM_001004158   | Gm5142        | -5.7305  | 1 | -7.34831 | 58.7825 | 0.229364  | Down |
| NM_080470      | Smc1b         | -5.72648 | 1 | -6.25122 | 49.7511 | 0.604181  | Down |
| NM_028524      | Cmtm2b        | -5.72278 | 1 | -6.89289 | 103.532 | 0.746958  | Down |
| NM_001162428   | 1700012B07Rik | -5.72099 | 1 | -7.08582 | 44.014  | 0.257315  | Down |
| NM_001166066   | Heatr7b2      | -5.72019 | 1 | -6.29202 | 32.7543 | 0.384349  | Down |
| NM_026315      | 1700011L22Rik | -5.71729 | 1 | -7.02277 | 70.1205 | 0.440435  | Down |
| NM_009350      | Adad1         | -5.71273 | 1 | -7.07762 | 30.9589 | 0.182026  | Down |
| NM_026645      | lqcf3         | -5.71142 | 1 | -6.11099 | 292.623 | 3.96706   | Down |
| NM_009182      | St8sia3       | -5.7068  | 1 | -7.44839 | 4.1838  | 0.0114317 | Down |
| NM_026293      | Spaca1        | -5.70546 | 1 | -7.01101 | 63.3926 | 0.401441  | Down |
| NM_029595      | Pbp2          | -5.70497 | 1 | -6.91467 | 65.1429 | 0.457267  | Down |
| NM_172901      | 4933405O20Rik | -5.70295 | 1 | -7.44457 | 19.5702 | 0.0536154 | Down |
| NM_021482      | Syngn4        | -5.69944 | 1 | -7.0644  | 62.7526 | 0.37236   | Down |
| NM_021308      | Piwil2        | -5.69864 | 1 | -6.36033 | 26.47   | 0.292249  | Down |
| NM_001162979   | Ccdc81        | -5.69644 | 1 | -6.4781  | 37.4493 | 0.373494  | Down |
| NM_025737      | 4931417E11Rik | -5.69134 | 1 | -7.43304 | 23.9369 | 0.0661059 | Down |
| NM_026188      | 1700028P14Rik | -5.68433 | 1 | -7.04938 | 68.9703 | 0.413542  | Down |
| NM_018870      | Pgam2         | -5.6816  | 1 | -6.181   | 235.464 | 3.0111    | Down |
| NM_009355      | Prss39        | -5.67579 | 1 | -6.84615 | 69.5811 | 0.518554  | Down |
| NM_030237      | Spz1          | -5.66572 | 1 | -5.97697 | 317.427 | 4.75318   | Down |
| NM_027964      | Zswim2        | -5.65802 | 1 | -6.91267 | 35.2183 | 0.243713  | Down |
| NM_011391      | Slc16a7       | -5.65187 | 1 | -6.0742  | 117.605 | 1.63229   | Down |
| NM_008807      | Tulp2         | -5.65015 | 1 | -6.36008 | 63.3176 | 0.693436  | Down |
| NM_001146021   | Lrrc18        | -5.65007 | 1 | -6.18937 | 145.356 | 1.83932   | Down |
| NM_028855      | Spem1         | -5.64838 | 1 | -6.21168 | 162.572 | 2.01934   | Down |
| NM_173367      | Cypt3         | -5.64569 | 1 | -7.26408 | 52.1127 | 0.215589  | Down |
| NM_029401      | Vwa5b1        | -5.64392 | 1 | -7.38599 | 6.52298 | 0.0186132 | Down |
| NM_177819      | Fam135b       | -5.64127 | 1 | -7.15994 | 9.31651 | 0.0465873 | Down |
| NM_001099321_2 | Gm15023       | -5.6399  | 1 | -7.382   | 6.7846  | 0.0194135 | Down |
| NM_177918_2    | AV320801      | -5.6399  | 1 | -7.382   | 6.7846  | 0.0194135 | Down |
| NM_008232      | Hdgfl1        | -5.63865 | 1 | -6.51438 | 44.9125 | 0.432042  | Down |
| NM_029150      | Spata16       | -5.63468 | 1 | -6.34467 | 54.8256 | 0.606885  | Down |
| NM_025490      | 1700010M22Rik | -5.63187 | 1 | -6.50763 | 118.85  | 1.14866   | Down |
| NM_030080      | Creb3l4       | -5.63107 | 1 | -6.26647 | 85.9382 | 1.017     | Down |
| NM_026594      | Rpl39l        | -5.62425 | 1 | -6.87908 | 88.1334 | 0.624269  | Down |
| NM_019964      | Dnajb8        | -5.62079 | 1 | -6.26906 | 129.309 | 1.52438   | Down |
| NM_009651      | Akap4         | -5.61881 | 1 | -5.853   | 296.905 | 4.86505   | Down |
| NM_028540      | 1700057K13Rik | -5.61755 | 1 | -6.78822 | 92.7428 | 0.719509  | Down |
| NM_027073      | 1700025E21Rik | -5.61085 | 1 | -6.39288 | 70.8892 | 0.750055  | Down |
| NM_025601      | 1700029H14Rik | -5.6106  | 1 | -6.17401 | 123.799 | 1.57842   | Down |

|              |               |          |   |          |         |           |      |
|--------------|---------------|----------|---|----------|---------|-----------|------|
| NM_198623    | Ubqln3        | -5.60681 | 1 | -6.11243 | 83.6668 | 1.12126   | Down |
| NM_008299    | Dnajb3        | -5.6053  | 1 | -6.13742 | 177.419 | 2.3295    | Down |
| NM_001162933 | Rpl10l        | -5.60135 | 1 | -6.81162 | 74.4618 | 0.561415  | Down |
| NR_033529    | Gm7444        | -5.601   | 1 | -6.11288 | 49.0222 | 0.656291  | Down |
| NR_003639    | 1700013N18Rik | -5.59613 | 1 | -6.16835 | 103.986 | 1.32946   | Down |
| NM_027630    | Ccdc105       | -5.59491 | 1 | -7.33736 | 14.1576 | 0.0417875 | Down |
| NM_001161855 | 4933416C03Rik | -5.58933 | 1 | -6.46532 | 38.4022 | 0.382206  | Down |
| NR_003596    | Gm6455        | -5.58839 | 1 | -6.95403 | 52.2697 | 0.334846  | Down |
| NM_029467    | Tcam1         | -5.58836 | 1 | -6.40971 | 30.0485 | 0.312658  | Down |
| NM_026286    | Ftmt          | -5.58238 | 1 | -7.32494 | 16.505  | 0.0491382 | Down |
| NM_028854    | Tbc1d21       | -5.57824 | 1 | -6.88453 | 56.7963 | 0.392658  | Down |
| NM_027076    | 1700019M22Rik | -5.57707 | 1 | -6.33012 | 160.617 | 1.78289   | Down |
| NM_001164485 | Fam170b       | -5.57571 | 1 | -6.94143 | 32.8088 | 0.212023  | Down |
| NM_013687    | Tcp11         | -5.57238 | 1 | -5.87084 | 260.224 | 4.19746   | Down |
| NM_172521    | BC125332      | -5.56974 | 1 | -8.31241 | 6.40704 | 0         | Down |
| NM_011781    | Adam25        | -5.56911 | 1 | -7.08827 | 15.635  | 0.082172  | Down |
| NM_001017441 | Tbata         | -5.55702 | 1 | -8.29977 | 23.7669 | 0         | Down |
| NM_027597    | Fam71d        | -5.55612 | 1 | -6.21834 | 67.575  | 0.823291  | Down |
| NM_001048005 | 1110017D15Rik | -5.55455 | 1 | -6.2474  | 97.6577 | 1.16      | Down |
| NM_001079875 | Spam1         | -5.55248 | 1 | -7.17155 | 15.4836 | 0.0683073 | Down |
| NM_030052    | Cox7b2        | -5.54973 | 1 | -6.80501 | 124.112 | 0.925482  | Down |
| NM_001123367 | Gm3448        | -5.54758 | 1 | -5.75651 | 1274.31 | 22.3492   | Down |
| NM_001123368 | Gm3417        | -5.54758 | 1 | -5.75651 | 1274.31 | 22.3492   | Down |
| NM_009435    | Tssk1         | -5.54713 | 1 | -6.1486  | 95.8218 | 1.23692   | Down |
| NM_029661    | 1700027D21Rik | -5.54423 | 1 | -7.06356 | 30.2649 | 0.161813  | Down |
| NM_001025380 | Adam39        | -5.5291  | 1 | -7.04854 | 16.3312 | 0.0882314 | Down |
| NM_030219    | Trim42        | -5.52684 | 1 | -7.26985 | 9.42255 | 0.0291478 | Down |
| NM_198224    | Ms4a13        | -5.52385 | 1 | -6.8899  | 38.9774 | 0.261058  | Down |
| NM_023630    | Gtf2a1l       | -5.52358 | 1 | -6.69479 | 48.2125 | 0.399085  | Down |
| NM_027050    | 1700008A04Rik | -5.52109 | 1 | -7.14039 | 52.5572 | 0.236934  | Down |
| NM_183307    | Ccdc63        | -5.52038 | 1 | -6.34206 | 37.487  | 0.048797  | Down |
| NM_027303    | Ankrd60       | -5.52032 | 1 | -6.82698 | 56.2124 | 0.404456  | Down |
| NM_198624    | Ubqlnl        | -5.52003 | 1 | -6.1114  | 61.2315 | 0.812256  | Down |
| NM_029671    | 1700034O15Rik | -5.5188  | 1 | -6.39516 | 111.264 | 1.16261   | Down |
| NM_001163271 | Fscb          | -5.51744 | 1 | -5.98535 | 60.2729 | 0.885811  | Down |
| NM_010589    | Jak3          | -5.50873 | 1 | -6.12111 | 33.3406 | 0.437972  | Down |
| NM_001013783 | Fam71b        | -5.50866 | 1 | -6.7642  | 29.9823 | 0.229994  | Down |
| NM_007605    | Capza3        | -5.50834 | 1 | -6.23851 | 76.6512 | 0.910187  | Down |
| NM_029299    | Spata19       | -5.50747 | 1 | -6.9436  | 66.5888 | 0.412592  | Down |
| NM_001081038 | Btbd16        | -5.50093 | 1 | -7.02057 | 11.3855 | 0.0627178 | Down |
| NM_008933    | Prm2          | -5.49805 | 1 | -5.65529 | 2744.9  | 51.7317   | Down |
| NM_011560    | Tcte3         | -5.49745 | 1 | -5.7569  | 809.354 | 14.1585   | Down |
| NR_003617    | 1700018B24Rik | -5.49652 | 1 | -6.93272 | 13.6491 | 0.0852118 | Down |
| NM_001009544 | 4921501E09Rik | -5.49575 | 1 | -7.01543 | 9.94851 | 0.0549982 | Down |
| NM_025749    | Zfp474        | -5.49142 | 1 | -6.85769 | 27.155  | 0.185987  | Down |
| NM_027070    | 1700019A02Rik | -5.49142 | 1 | -6.85769 | 83.5871 | 0.572496  | Down |
| NM_001080553 | Gsg1          | -5.4914  | 1 | -5.76005 | 433.921 | 7.57068   | Down |
| NM_173412    | Cypt4         | -5.49113 | 1 | -6.11496 | 194.686 | 2.56396   | Down |
| NM_011569    | Tekt1         | -5.48926 | 1 | -6.00797 | 124.218 | 1.78712   | Down |
| NM_028525    | Prss52        | -5.48709 | 1 | -7.23044 | 22.0728 | 0.0701769 | Down |
| NM_183190    | Ms4a5         | -5.48252 | 1 | -6.6935  | 74.2654 | 0.607754  | Down |
| NM_207258    | Fam71f1       | -5.47943 | 1 | -6.15667 | 67.7607 | 0.859501  | Down |
| NM_001081063 | Prss55        | -5.47883 | 1 | -6.91516 | 44.7683 | 0.28292   | Down |
| NM_183320    | Gm5128        | -5.4781  | 1 | -7.22154 | 5.85014 | 0.0187151 | Down |
| NM_001033461 | Lrrc43        | -5.4736  | 1 | -8.21706 | 10.9396 | 0         | Down |
| NM_010086    | Adam24        | -5.47096 | 1 | -6.682   | 24.259  | 0.200114  | Down |
| NM_001177524 | Gml           | -5.46908 | 1 | -7.21257 | 24.946  | 0.0803031 | Down |
| NM_009839    | Cct6b         | -5.46422 | 1 | -6.07676 | 71.818  | 0.972887  | Down |
| NM_133689    | 4930579J09Rik | -5.46142 | 1 | -6.633   | 51.2898 | 0.443154  | Down |
| NM_030141    | 1700061G19Rik | -5.45628 | 1 | -6.97626 | 15.4432 | 0.0877283 | Down |
| NM_001081254 | Fam186b       | -5.4547  | 1 | -6.76178 | 17.9535 | 0.135157  | Down |
| NM_145574    | Ccdc136       | -5.43252 | 1 | -5.71766 | 146.633 | 2.63227   | Down |
| NM_001195601 | 1700015G11Rik | -5.43122 | 1 | -6.64252 | 174.592 | 1.48023   | Down |
| NM_027074    | 1700025F22Rik | -5.42768 | 1 | -8.17155 | 34.3495 | 0         | Down |
| NM_001009548 | 4930529F22Rik | -5.42614 | 1 | -6.73343 | 21.6697 | 0.166375  | Down |
| NM_175370    | Als2cr12      | -5.41599 | 1 | -6.29292 | 48.732  | 0.546632  | Down |
| NM_174885    | Adam6a        | -5.4132  | 1 | -6.62461 | 26.6874 | 0.22909   | Down |
| NM_183287    | 2610318N02Rik | -5.41163 | 1 | -5.97573 | 112.412 | 1.6445    | Down |
| NM_001039494 | 1700019N12Rik | -5.40131 | 1 | -5.99312 | 165.978 | 2.38997   | Down |
| NM_007473    | Aqp7          | -5.39648 | 1 | -6.608   | 26.2039 | 0.227547  | Down |
| NM_001172091 | 1700001C19Rik | -5.396   | 1 | -6.21834 | 58.6149 | 0.69648   | Down |
| NM_001083890 | 4932441B19Rik | -5.39513 | 1 | -7.01543 | 8.61396 | 0.0423546 | Down |
| NM_027949    | Phf7          | -5.38628 | 1 | -5.59462 | 455.498 | 8.93769   | Down |
| NM_030104    | 1700090G07Rik | -5.38594 | 1 | -6.6935  | 72.5659 | 0.5728    | Down |
| NM_026459    | Ccdc70        | -5.3842  | 1 | -6.5958  | 62.2211 | 0.544903  | Down |
| NM_001109759 | Fam71a        | -5.38002 | 1 | -6.25717 | 33.5362 | 0.385627  | Down |

|                |               |          |   |          |         |           |      |
|----------------|---------------|----------|---|----------|---------|-----------|------|
| NM_001033296   | Sel112        | -5.37984 | 1 | -6.81688 | 19.1271 | 0.129411  | Down |
| NM_026256      | Poteg         | -5.37771 | 1 | -6.99815 | 20.0367 | 0.0997097 | Down |
| NM_177597      | March11       | -5.37506 | 1 | -6.81214 | 27.3456 | 0.185626  | Down |
| NM_198621      | Cct811        | -5.37396 | 1 | -6.89457 | 18.2673 | 0.109828  | Down |
| NM_027970      | 1700023E05Rik | -5.37114 | 1 | -6.89177 | 20.7984 | 0.12529   | Down |
| NM_027940      | 1700001F09Rik | -5.36541 | 1 | -6.67311 | 60.932  | 0.487821  | Down |
| NM_029141      | 4930511M11Rik | -5.36501 | 1 | -6.5372  | 41.6498 | 0.384594  | Down |
| NM_025741      | Trpd52I3      | -5.35978 | 1 | -6.8805  | 15.9004 | 0.0965365 | Down |
| NM_175176      | 4922501L14Rik | -5.35895 | 1 | -5.97191 | 58.8695 | 0.857632  | Down |
| NM_001002894   | Nlrp14        | -5.35775 | 1 | -6.56953 | 19.621  | 0.174993  | Down |
| NM_177785      | BC049635      | -5.35616 | 1 | -5.91209 | 84.9698 | 1.30056   | Down |
| NM_001009545   | Adam6b        | -5.35219 | 1 | -6.65999 | 23.4765 | 0.189672  | Down |
| NM_001101463   | Gm4871        | -5.34965 | 1 | -6.71692 | 42.0997 | 0.317941  | Down |
| NM_029308      | 1700010B08Rik | -5.34608 | 1 | -6.78339 | 46.2805 | 0.320495  | Down |
| NM_177866      | Catsper4      | -5.34363 | 1 | -6.78096 | 23.9708 | 0.166279  | Down |
| NM_198106      | Slc9a10       | -5.33874 | 1 | -6.77611 | 10.7555 | 0.0748602 | Down |
| NM_001040669   | Gm5169        | -5.33618 | 1 | -7.0809  | 22.8655 | 0.080664  | Down |
| NM_007391      | Acrv1         | -5.32986 | 1 | -6.58658 | 52.8903 | 0.458938  | Down |
| NM_029416      | Klf17         | -5.32621 | 1 | -7.07102 | 5.62196 | 0.0199697 | Down |
| NM_001100609_2 | Gm10487       | -5.32413 | 1 | -6.94504 | 30.6587 | 0.158304  | Down |
| NM_001102678_3 | Gm10096       | -5.32413 | 1 | -6.94504 | 30.6587 | 0.158304  | Down |
| NM_009529_2    | Gm4836        | -5.32413 | 1 | -6.94504 | 30.6587 | 0.158304  | Down |
| NM_027033      | Lrrc67        | -5.32049 | 1 | -6.94143 | 35.3798 | 0.18314   | Down |
| NM_008588      | Mesp1         | -5.31615 | 1 | -7.06107 | 18.6366 | 0.0666583 | Down |
| NM_025758      | Asb17         | -5.30752 | 1 | -6.4801  | 64.1734 | 0.616526  | Down |
| NM_183271      | Wfdc15a       | -5.30604 | 1 | -8.05105 | 42.7729 | 0         | Down |
| NR_015460      | 1700003H04Rik | -5.30604 | 1 | -7.05105 | 26.3305 | 0.0948362 | Down |
| NM_009028      | Rasl2-9-ps    | -5.30593 | 1 | -6.61407 | 51.1818 | 0.426904  | Down |
| NM_025738      | Cypt1         | -5.30171 | 1 | -6.51388 | 92.061  | 0.853385  | Down |
| NM_009420      | Crisp2        | -5.28634 | 1 | -5.46252 | 794.518 | 17.1047   | Down |
| NM_001195271   | Gm362         | -5.28043 | 1 | -7.0257  | 8.73104 | 0.0320067 | Down |
| NM_001081331   | D7Erd443e     | -5.27766 | 1 | -6.64548 | 18.6518 | 0.148023  | Down |
| NM_027952      | 1700008I05Rik | -5.27006 | 1 | -7.01543 | 10.9484 | 0.0404228 | Down |
| NM_001099325_2 | Gm10488       | -5.2685  | 1 | -6.8899  | 30.6202 | 0.164281  | Down |
| NM_030068      | Iqch          | -5.26469 | 1 | -5.79798 | 42.2619 | 0.702164  | Down |
| NM_001166494   | Zbp2          | -5.26411 | 1 | -6.08722 | 43.7547 | 0.569422  | Down |
| NM_001097977   | Gm14151       | -5.26268 | 1 | -5.76943 | 58.4774 | 0.994112  | Down |
| NM_028920      | Hyal6         | -5.25952 | 1 | -6.21257 | 19.422  | 0.228766  | Down |
| NM_001081096   | Fam154a       | -5.25941 | 1 | -6.78096 | 18.0404 | 0.117369  | Down |
| NM_177801      | 4933400C05Rik | -5.25941 | 1 | -6.78096 | 29.7699 | 0.193681  | Down |
| NM_207527      | 4930504O13Rik | -5.25711 | 1 | -6.87861 | 44.403  | 0.240104  | Down |
| NM_021921      | Mapk8ip2      | -5.25437 | 1 | -7.99989 | 5.43522 | 0         | Down |
| NM_007628      | Ccna1         | -5.25358 | 1 | -6.46609 | 38.2733 | 0.366748  | Down |
| NM_146186      | Wdr62         | -5.24855 | 1 | -5.76811 | 31.1738 | 0.529655  | Down |
| NM_029799      | Arrdc5        | -5.24828 | 1 | -6.61633 | 41.9742 | 0.339919  | Down |
| NM_028448      | Cenpv         | -5.24428 | 1 | -5.86914 | 102.248 | 1.5969    | Down |
| NM_177631      | BC048502      | -5.24242 | 1 | -6.68056 | 53.4023 | 0.397184  | Down |
| NM_001199632   | Fbxl13        | -5.2423  | 1 | -5.87927 | 38.7949 | 0.600533  | Down |
| NM_027034      | Izumo3        | -5.24141 | 1 | -6.60952 | 34.9292 | 0.284208  | Down |
| NM_001164606   | Ccdc116       | -5.23904 | 1 | -5.91736 | 23.4342 | 0.350921  | Down |
| NM_009356      | Prss40        | -5.23849 | 1 | -7.98418 | 14.6355 | 0         | Down |
| NM_001039657   | Mtl5          | -5.23682 | 1 | -6.60496 | 20.1356 | 0.164357  | Down |
| NM_028156      | 1700001P01Rik | -5.23316 | 1 | -7.9789  | 30.379  | 0         | Down |
| NM_001004174   | AA467197      | -5.22743 | 1 | -6.53617 | 76.4444 | 0.673304  | Down |
| NM_027089      | 4930579C15Rik | -5.22672 | 1 | -6.4842  | 43.927  | 0.409232  | Down |
| NR_029436      | 1700028J19Rik | -5.22588 | 1 | -5.83941 | 90.8885 | 1.45154   | Down |
| NM_013638      | Prm3          | -5.2183  | 1 | -6.58658 | 106.68  | 0.881953  | Down |
| NM_028825      | 1700011F03Rik | -5.21731 | 1 | -6.47486 | 66.4112 | 0.622722  | Down |
| NM_001113179   | Bub1          | -5.21591 | 1 | -6.0941  | 15.4266 | 0.198638  | Down |
| NM_053149      | Hemgn         | -5.21542 | 1 | -6.47298 | 23.1706 | 0.217548  | Down |
| NM_001163189   | Enthd1        | -5.21166 | 1 | -7.95761 | 8.85199 | 0         | Down |
| NM_028957      | Hyal5         | -5.2108  | 1 | -6.51966 | 23.3657 | 0.20809   | Down |
| NM_025750      | 4933417A18Rik | -5.21063 | 1 | -6.83256 | 24.6328 | 0.137531  | Down |
| NM_025725      | Ccdc96        | -5.21031 | 1 | -5.8603  | 26.8738 | 0.42065   | Down |
| NM_172808      | Antxrl        | -5.20623 | 1 | -6.95223 | 8.75259 | 0.0337681 | Down |
| NM_153527      | Dnajb13       | -5.20427 | 1 | -5.88276 | 77.8024 | 1.19338   | Down |
| NM_029685      | 1700113H08Rik | -5.20274 | 1 | -6.82474 | 19.0449 | 0.106911  | Down |
| NM_001013750   | Gm597         | -5.20188 | 1 | -6.57031 | 14.8962 | 0.124551  | Down |
| NM_026627      | H2afb1        | -5.20103 | 1 | -6.15449 | 122.66  | 1.50419   | Down |
| NM_001039942   | Cypt9         | -5.19997 | 1 | -5.89443 | 159.485 | 2.41992   | Down |
| NM_001039944   | Cypt10        | -5.19997 | 1 | -5.89443 | 159.485 | 2.41992   | Down |
| NM_001079873   | Brdt          | -5.19818 | 1 | -6.50715 | 30.1944 | 0.271251  | Down |
| NM_026132      | Txndc8        | -5.19447 | 1 | -6.4522  | 85.3682 | 0.813166  | Down |
| NM_029680      | 1700110M21Rik | -5.19396 | 1 | -6.50296 | 25.6763 | 0.231335  | Down |
| NM_001099347_3 | Gm10230       | -5.19053 | 1 | -6.71269 | 35.3538 | 0.241179  | Down |
| NM_001099919_3 | Gm10147       | -5.19053 | 1 | -6.71269 | 36.5404 | 0.249274  | Down |

|                |               |          |   |          |         |           |      |
|----------------|---------------|----------|---|----------|---------|-----------|------|
| NM_001100610_3 | Gm14632       | -5.19053 | 1 | -6.71269 | 35.3538 | 0.241179  | Down |
| NM_001109970_3 | Gm10486       | -5.19053 | 1 | -6.71269 | 34.1676 | 0.233088  | Down |
| NM_001110250_3 | Gm14819       | -5.19053 | 1 | -6.71269 | 35.3538 | 0.241179  | Down |
| NM_015777      | Igbp1b        | -5.18981 | 1 | -7.93599 | 13.6087 | 0         | Down |
| NM_001033255   | Gm136         | -5.18357 | 1 | -6.62221 | 28.4548 | 0.220387  | Down |
| NM_001109969_3 | Gm10058       | -5.18088 | 1 | -6.70313 | 35.2776 | 0.242264  | Down |
| NM_027640      | Prss54        | -5.18088 | 1 | -6.70313 | 27.2238 | 0.186956  | Down |
| NM_001098269   | Gm10375       | -5.18084 | 1 | -6.6195  | 44.2667 | 0.343497  | Down |
| NM_027951      | Tekt4         | -5.18057 | 1 | -6.23246 | 40.6694 | 0.468609  | Down |
| NM_001033162   | 1700012A16Rik | -5.17996 | 1 | -6.0036  | 33.0914 | 0.456373  | Down |
| NM_175511      | Fam78a        | -5.17932 | 1 | -5.91112 | 19.2173 | 0.286376  | Down |
| NM_198673      | Odf31         | -5.17879 | 1 | -6.80103 | 23.2955 | 0.132946  | Down |
| NM_172953      | Serpina5      | -5.1781  | 1 | -6.61679 | 17.0848 | 0.132823  | Down |
| NM_029696      | Mdh1b         | -5.17763 | 1 | -6.05607 | 38.0847 | 0.503502  | Down |
| NM_026359      | 4930578I06Rik | -5.17733 | 1 | -6.39041 | 55.0527 | 0.555598  | Down |
| NM_019569      | Fscn3         | -5.17607 | 1 | -6.05453 | 36.3649 | 0.48128   | Down |
| NM_172447      | A330021E22Rik | -5.17205 | 1 | -5.62293 | 56.098  | 1.06193   | Down |
| NM_177738      | BC048671      | -5.17073 | 1 | -6.79304 | 21.5688 | 0.123778  | Down |
| NM_181859      | Oxct2b        | -5.16353 | 1 | -5.94792 | 39.7961 | 0.573345  | Down |
| NM_145852      | Ropn1l        | -5.16334 | 1 | -5.51763 | 311.244 | 6.39019   | Down |
| NM_021440      | BC100451      | -5.16022 | 1 | -5.56126 | 113.383 | 2.25027   | Down |
| NM_009948      | Cpt1b         | -5.15819 | 1 | -5.76124 | 36.7249 | 0.620171  | Down |
| NM_033571      | Fkbp6         | -5.15077 | 1 | -7.89737 | 12.8487 | 0         | Down |
| NM_172526      | Ttc24         | -5.14824 | 1 | -6.67078 | 13.6228 | 0.0956788 | Down |
| NM_183254      | 1700025K23Rik | -5.14575 | 1 | -5.45813 | 485.846 | 10.4244   | Down |
| NM_001033246   | Ccdc110       | -5.14497 | 1 | -6.09884 | 23.5937 | 0.300724  | Down |
| NM_001099277   | Zfp541        | -5.14171 | 1 | -6.0956  | 13.5535 | 0.173142  | Down |
| NM_001145879   | Atp6ap1l      | -5.14161 | 1 | -6.66422 | 25.9571 | 0.18314   | Down |
| NM_173029      | Adcy10        | -5.14124 | 1 | -5.72445 | 21.4203 | 0.372117  | Down |
| NM_031190      | Pgk2          | -5.14025 | 1 | -5.41601 | 281.092 | 6.22309   | Down |
| NM_023048      | Asb4          | -5.13942 | 1 | -6.88615 | 5.40995 | 0.0218542 | Down |
| NM_022033      | Oxct2a        | -5.13829 | 1 | -6.01701 | 36.0344 | 0.489484  | Down |
| NM_028946      | Nhedc1        | -5.13764 | 1 | -6.35103 | 24.6486 | 0.255825  | Down |
| NM_001164258   | Xrra1         | -5.13692 | 1 | -6.31073 | 22.7277 | 0.245579  | Down |
| NM_001162846   | Phyhipl       | -5.13399 | 1 | -5.71723 | 40.7715 | 0.711846  | Down |
| NM_025727      | Klhl10        | -5.13378 | 1 | -5.60787 | 80.3963 | 1.5343    | Down |
| NM_030744      | Ropn1         | -5.1335  | 1 | -6.01225 | 74.8951 | 1.02072   | Down |
| NM_198251      | Rnf133        | -5.13059 | 1 | -5.78096 | 69.6929 | 1.15261   | Down |
| NM_153518      | Ccdc65        | -5.12685 | 1 | -5.91147 | 36.2388 | 0.535468  | Down |
| NM_027948      | 1700003E16Rik | -5.1241  | 1 | -5.65092 | 64.6614 | 1.19068   | Down |
| NM_199023      | 4930526D03Rik | -5.12235 | 1 | -6.43194 | 63.5607 | 0.6016    | Down |
| NM_027031      | Efcab9        | -5.11563 | 1 | -6.37399 | 65.1497 | 0.655198  | Down |
| NM_177711      | 4932411G14Rik | -5.11483 | 1 | -6.63769 | 7.83067 | 0.0562772 | Down |
| NM_134471      | Kif2c         | -5.10988 | 1 | -5.58406 | 56.2223 | 1.09082   | Down |
| NM_153093      | AF366264      | -5.10894 | 1 | -6.41864 | 15.7717 | 0.150663  | Down |
| NM_026789      | Wdr65         | -5.10864 | 1 | -5.64991 | 33.3039 | 0.612616  | Down |
| NR_001586      | Speer1-ps1    | -5.10688 | 1 | -6.47611 | 36.3259 | 0.324259  | Down |
| NM_001104946   | Gm2012        | -5.10481 | 1 | -6.85193 | 19.4765 | 0.0805735 | Down |
| NM_001024706   | Gm5458        | -5.10448 | 1 | -6.72745 | 23.8094 | 0.14301   | Down |
| NM_173436      | Cypt2-ps      | -5.10448 | 1 | -6.72745 | 34.3952 | 0.206593  | Down |
| NM_027588      | Nt5c1b        | -5.10322 | 1 | -5.56777 | 88.6659 | 1.74156   | Down |
| NM_028034      | Tdrd12        | -5.10125 | 1 | -6.62424 | 18.3154 | 0.132864  | Down |
| NM_027283      | 1700026L06Rik | -5.09875 | 1 | -5.67292 | 166.183 | 2.99575   | Down |
| NM_001039114   | Acsbg2        | -5.09452 | 1 | -5.72009 | 36.5567 | 0.633126  | Down |
| NM_025496      | Cdrt4         | -5.0922  | 1 | -5.91642 | 88.1042 | 1.29085   | Down |
| NM_027941      | Lrrc34        | -5.09169 | 1 | -5.58728 | 78.7833 | 1.52166   | Down |
| NM_025506      | Riiad1        | -5.08761 | 1 | -6.52711 | 55.2661 | 0.457267  | Down |
| NM_026134      | Cylc1         | -5.08753 | 1 | -6.61066 | 14.9824 | 0.109716  | Down |
| NM_144547      | Amhr2         | -5.08753 | 1 | -6.61066 | 15.1055 | 0.110618  | Down |
| NM_001033191   | Naa11         | -5.0872  | 1 | -6.83451 | 5.09645 | 0.021341  | Down |
| NM_177901      | 4933402J07Rik | -5.0849  | 1 | -6.13752 | 57.0215 | 0.701769  | Down |
| NM_001163385   | 4930579F01Rik | -5.08403 | 1 | -6.45347 | 23.082  | 0.209303  | Down |
| NM_027055      | Spaca4        | -5.08064 | 1 | -6.60382 | 41.2268 | 0.303342  | Down |
| NM_001033408   | Rbm44         | -5.07813 | 1 | -6.0325  | 15.3647 | 0.205064  | Down |
| NM_001199090   | 4930522H14Rik | -5.07452 | 1 | -6.69779 | 26.5497 | 0.162791  | Down |
| NM_177213      | Abca15        | -5.07018 | 1 | -6.6935  | 4.37622 | 0.0269132 | Down |
| NM_175667      | Ankrd5        | -5.06163 | 1 | -5.58195 | 47.7331 | 0.922763  | Down |
| NM_025728      | Spag16        | -5.06148 | 1 | -6.68489 | 18.0324 | 0.111563  | Down |
| NM_029379      | Tmem225       | -5.06148 | 1 | -6.68489 | 23.4185 | 0.144886  | Down |
| NM_153519      | Txndc2        | -5.05849 | 1 | -5.38285 | 180.346 | 4.07384   | Down |
| NM_139151      | Spag4         | -5.05516 | 1 | -6.49495 | 22.5968 | 0.191188  | Down |
| NM_011483      | Znrf4         | -5.05484 | 1 | -6.26889 | 42.2894 | 0.464666  | Down |
| NR_037972      | BB014433      | -5.05464 | 1 | -5.60382 | 66.6439 | 1.2645    | Down |
| NM_015773      | Spag6         | -5.05446 | 1 | -5.49348 | 71.6147 | 1.48473   | Down |
| NM_011651      | Tsks          | -5.0537  | 1 | -5.83879 | 35.4384 | 0.550725  | Down |
| NM_029307      | Hspb9         | -5.05175 | 1 | -5.4869  | 246.805 | 5.14205   | Down |

|              |               |          |   |          |         |           |      |
|--------------|---------------|----------|---|----------|---------|-----------|------|
| NM_173861    | Csnka2ip      | -5.05038 | 1 | -6.42012 | 29.2142 | 0.271114  | Down |
| NR_015568    | 4933406F09Rik | -5.04977 | 1 | -6.10267 | 44.0365 | 0.555228  | Down |
| NM_027306    | Zdhhc25       | -5.04524 | 1 | -6.79304 | 13.4219 | 0.0578493 | Down |
| NM_029049    | Ptchd3        | -5.04514 | 1 | -6.41492 | 11.9098 | 0.110925  | Down |
| NM_001163517 | Pex5l         | -5.03926 | 1 | -6.25344 | 23.6561 | 0.26273   | Down |
| NM_175939    | Adam29        | -5.03713 | 1 | -6.47711 | 12.2255 | 0.104728  | Down |
| NM_021318    | Fhl5          | -5.03583 | 1 | -5.61031 | 96.6241 | 1.81914   | Down |
| NM_001162864 | Ttbk1         | -5.03548 | 1 | -6.08849 | 8.10197 | 0.103163  | Down |
| NM_001101486 | Fam71f2       | -5.03511 | 1 | -5.64956 | 80.4195 | 1.46512   | Down |
| NM_001033315 | Hipk4         | -5.03458 | 1 | -6.40447 | 15.8498 | 0.148697  | Down |
| NM_153778    | Atoh8         | -5.03288 | 1 | -6.34323 | 18.1782 | 0.182985  | Down |
| NM_028852    | Spatc1        | -5.03163 | 1 | -6.20627 | 34.6511 | 0.402566  | Down |
| NM_001142750 | Tgif2lx2      | -5.02688 | 1 | -6.77489 | 15.9375 | 0.0695649 | Down |
| NM_153109    | Tgif2lx1      | -5.02688 | 1 | -6.77489 | 16.0935 | 0.0702456 | Down |
| NM_024271    | 1700016D06Rik | -5.02058 | 1 | -6.54436 | 22.2377 | 0.170525  | Down |
| NM_011444    | Sox5          | -5.01556 | 1 | -6.22995 | 17.4412 | 0.19689   | Down |
| NM_001162901 | Tmem217       | -5.01451 | 1 | -6.76266 | 17.7455 | 0.0781186 | Down |
| NM_172851    | Cntnap5b      | -5.00971 | 1 | -6.5336  | 5.44476 | 0.042065  | Down |
| NM_001114754 | Gm6121        | -5.00828 | 1 | -6.75651 | 18.2045 | 0.0804832 | Down |
| NM_177873    | Hfm1          | -5.00462 | 1 | -6.05789 | 11.0593 | 0.143841  | Down |
| NM_175214    | Kif27         | -5.0043  | 1 | -5.38911 | 48.8569 | 1.09408   | Down |
| NM_018790    | Arc           | -5.00287 | 1 | -5.64103 | 28.2921 | 0.516651  | Down |
| NM_028927    | Tktl2         | -5.00177 | 1 | -6.31241 | 20.5422 | 0.211253  | Down |
| NM_027064    | 1700024P04Rik | -5.00044 | 1 | -5.8253  | 125.623 | 1.96068   | Down |
| NM_001004148 | Slc13a5       | -4.99877 | 1 | -6.52277 | 8.46378 | 0.0658834 | Down |
| NM_144953    | 1700019D03Rik | -4.99848 | 1 | -5.54792 | 135.291 | 2.66849   | Down |
| NM_008293    | Hsd3b1        | -4.99432 | 1 | -6.36458 | 20.095  | 0.19382   | Down |
| NM_173023    | Catsperb      | -4.99419 | 1 | -6.43458 | 8.7585  | 0.0772777 | Down |
| NM_201374    | Ccdc155       | -4.98229 | 1 | -6.29311 | 18.7004 | 0.194908  | Down |
| NM_028526    | Pebp4         | -4.98069 | 1 | -6.60496 | 31.228  | 0.202422  | Down |
| NM_028384    | Ccdc13        | -4.9801  | 1 | -5.71307 | 25.4485 | 0.435097  | Down |
| NM_008085    | Gapdhs        | -4.97958 | 1 | -5.33859 | 185.319 | 4.30637   | Down |
| NM_011987    | Pla2g10       | -4.97675 | 1 | -6.72535 | 15.5479 | 0.0702456 | Down |
| NM_027631    | 4931407G18Rik | -4.97266 | 1 | -5.27372 | 227.087 | 5.54091   | Down |
| NM_001177502 | 1700013D24Rik | -4.97142 | 1 | -6.5958  | 40.85   | 0.26888   | Down |
| NM_028509    | 1700034J05Rik | -4.97138 | 1 | -5.52096 | 54.4455 | 1.09416   | Down |
| NM_001013609 | Tex24         | -4.97035 | 1 | -6.71904 | 8.9532  | 0.0406287 | Down |
| NM_001168602 | Smok3a        | -4.97035 | 1 | -7.71904 | 5.81201 | 0         | Down |
| NM_026262    | 4930524B15Rik | -4.97035 | 1 | -6.71904 | 8.0757  | 0.0366467 | Down |
| NM_001163609 | Psma8         | -4.96998 | 1 | -6.28091 | 24.2052 | 0.254428  | Down |
| NM_025746    | 4933415F23Rik | -4.96796 | 1 | -5.35824 | 116.403 | 2.66191   | Down |
| NM_029453    | Wdr64         | -4.96746 | 1 | -6.02104 | 14.0993 | 0.188131  | Down |
| NM_028562    | 1700080E11Rik | -4.96254 | 1 | -6.27355 | 46.8087 | 0.494542  | Down |
| NM_027584    | Slco6d1       | -4.96211 | 1 | -6.58658 | 9.31035 | 0.0616761 | Down |
| NM_175384    | Cdca2         | -4.9589  | 1 | -5.50086 | 31.7698 | 0.648043  | Down |
| NM_023279    | Tubb3         | -4.95749 | 1 | -7.70632 | 9.10094 | 0         | Down |
| NM_001162865 | Cylc2         | -4.95314 | 1 | -6.39394 | 24.3952 | 0.221406  | Down |
| NM_030097    | 1700034E13Rik | -4.95314 | 1 | -6.39394 | 66.3325 | 0.602021  | Down |
| NM_001045527 | Hsf5          | -4.95211 | 1 | -5.50177 | 26.2815 | 0.535238  | Down |
| NM_027056    | 1700012P22Rik | -4.95101 | 1 | -7.69993 | 16.0609 | 0         | Down |
| NM_001163537 | Dnajc5b       | -4.94535 | 1 | -6.12072 | 54.8212 | 0.675856  | Down |
| NM_173433    | Kdm4d         | -4.94341 | 1 | -5.69993 | 23.5364 | 0.404532  | Down |
| NM_175378    | Clip4         | -4.93821 | 1 | -5.72409 | 28.6185 | 0.481588  | Down |
| NM_001045543 | Gm11435       | -4.93796 | 1 | -6.68705 | 8.25164 | 0.0382885 | Down |
| NM_001039941 | Cypt8         | -4.93685 | 1 | -6.19676 | 74.8904 | 0.851757  | Down |
| NM_029597    | 1700018B08Rik | -4.93366 | 1 | -6.14876 | 44.526  | 0.531785  | Down |
| NM_008978    | Ptpn20        | -4.9298  | 1 | -6.10531 | 16.7804 | 0.2091    | Down |
| NM_027019    | Odf3          | -4.92359 | 1 | -6.44839 | 28.4353 | 0.233088  | Down |
| NM_027602    | Nsun7         | -4.91686 | 1 | -5.74235 | 22.1204 | 0.365706  | Down |
| NM_029300    | lqcf5         | -4.91418 | 1 | -6.35538 | 56.6255 | 0.527875  | Down |
| NM_027559    | Wdr96         | -4.91361 | 1 | -5.29873 | 34.4304 | 0.820882  | Down |
| NM_001039943 | Cypt7         | -4.9114  | 1 | -6.17155 | 75.5108 | 0.873977  | Down |
| NM_001033775 | 4933422H20Rik | -4.91013 | 1 | -6.08582 | 26.4775 | 0.33443   | Down |
| NM_027600    | 4921504E06Rik | -4.90973 | 1 | -6.5348  | 10.4331 | 0.0716477 | Down |
| NM_001100394 | 4930505A04Rik | -4.90673 | 1 | -6.16692 | 46.7884 | 0.543283  | Down |
| NM_183096    | Ttc29         | -4.90616 | 1 | -6.08189 | 20.8225 | 0.263722  | Down |
| NM_029310    | Fabp12        | -4.90487 | 1 | -6.53    | 8.29546 | 0.0571584 | Down |
| NM_183182    | BC055111      | -4.90487 | 1 | -6.53    | 10.5778 | 0.0728842 | Down |
| NM_172864    | Wdr63         | -4.90085 | 1 | -5.58103 | 23.4043 | 0.442579  | Down |
| NM_026278    | Lrp2bp        | -4.90026 | 1 | -6.4253  | 7.56026 | 0.0629745 | Down |
| NM_001033043 | Rnf17         | -4.89881 | 1 | -5.72445 | 10.8324 | 0.181326  | Down |
| NM_177203    | A730037C10Rik | -4.8981  | 1 | -6.6477  | 6.63742 | 0.0316539 | Down |
| NM_027966    | 1700019O17Rik | -4.89497 | 1 | -6.15527 | 24.9453 | 0.292003  | Down |
| NM_025733    | 4921530L21Rik | -4.89096 | 1 | -6.3324  | 26.2253 | 0.248412  | Down |
| NM_172497    | Efhb          | -4.88814 | 1 | -5.94241 | 19.1453 | 0.269789  | Down |
| NM_011741    | Zan           | -4.88404 | 1 | -6.25538 | 2.0932  | 0.0217799 | Down |

|              |               |          |   |          |         |           |      |
|--------------|---------------|----------|---|----------|---------|-----------|------|
| NR_033653    | Kif4b         | -4.88051 | 1 | -6.40578 | 6.95979 | 0.0587648 | Down |
| NM_199150    | BC049730      | -4.88034 | 1 | -6.50575 | 17.4827 | 0.12251   | Down |
| NR_038059_2  | 1700110101Rik | -4.87547 | 1 | -6.18731 | 22.5622 | 0.253082  | Down |
| NM_008429    | Kcnj9         | -4.87223 | 1 | -6.2437  | 10.4646 | 0.109772  | Down |
| NM_183104    | 4931429L15Rik | -4.87019 | 1 | -6.18208 | 18.7832 | 0.211461  | Down |
| NM_177570    | Sfnl1         | -4.86964 | 1 | -5.44496 | 54.0298 | 1.14083   | Down |
| NM_001085499 | Gm595         | -4.86854 | 1 | -6.39394 | 11.922  | 0.101495  | Down |
| NM_025752    | 4933411K16Rik | -4.86811 | 1 | -5.11985 | 316.28  | 8.60877   | Down |
| NR_003953    | 1700022A21Rik | -4.86762 | 1 | -5.6935  | 37.6862 | 0.644532  | Down |
| NR_033566    | Al507597      | -4.86713 | 1 | -5.74795 | 60.9007 | 0.997097  | Down |
| NM_001039495 | Ccdc108       | -4.867   | 1 | -5.30288 | 27.5822 | 0.652873  | Down |
| NM_027967    | 1700026J04Rik | -4.86628 | 1 | -5.35181 | 53.9793 | 1.22899   | Down |
| NM_173069    | Speer2        | -4.86542 | 1 | -6.49101 | 18.1401 | 0.128427  | Down |
| NM_026090    | lqc4          | -4.86539 | 1 | -5.54578 | 96.8224 | 1.87624   | Down |
| NM_001081095 | 1700009N14Rik | -4.86366 | 1 | -5.56006 | 53.5122 | 1.02396   | Down |
| NM_026108    | Hdhd1a        | -4.86332 | 1 | -6.23487 | 32.5768 | 0.343826  | Down |
| NM_001205049 | Acr           | -4.86034 | 1 | -6.23192 | 22.6875 | 0.239943  | Down |
| NM_178387    | Spata18       | -4.85796 | 1 | -5.48482 | 41.5512 | 0.8472    | Down |
| NM_198635    | Gm5134        | -4.85712 | 1 | -7.60724 | 5.16062 | 0         | Down |
| NM_001081046 | Efcab3        | -4.85575 | 1 | -6.07157 | 26.1349 | 0.329316  | Down |
| NM_172535    | lqub          | -4.85467 | 1 | -5.3513  | 33.7107 | 0.766872  | Down |
| NM_010084    | Adam18        | -4.85026 | 1 | -5.50219 | 31.8208 | 0.638547  | Down |
| NM_029381    | Tex22         | -4.84672 | 1 | -5.80302 | 39.8245 | 0.623284  | Down |
| NM_172879    | 4932412H11Rik | -4.84429 | 1 | -6.36996 | 8.43117 | 0.072983  | Down |
| NM_028557    | Mbd3l1        | -4.8402  | 1 | -6.36593 | 29.9646 | 0.260112  | Down |
| NR_003644    | 1700049L16Rik | -4.8401  | 1 | -6.05607 | 55.9446 | 0.712565  | Down |
| NM_025503    | 1700029P11Rik | -4.83803 | 1 | -6.15025 | 36.548  | 0.42065   | Down |
| NM_001163550 | 1700016H13Rik | -4.83743 | 1 | -5.45296 | 104.849 | 2.18931   | Down |
| NM_001163639 | Ttc18         | -4.83673 | 1 | -5.28894 | 40.6657 | 0.970421  | Down |
| NM_007697    | Chl1          | -4.83659 | 1 | -5.20953 | 26.6328 | 0.676137  | Down |
| NM_011487    | Stat4         | -4.83494 | 1 | -5.53152 | 22.2101 | 0.433491  | Down |
| NM_026104    | Tmco5         | -4.83334 | 1 | -6.04938 | 37.8115 | 0.483848  | Down |
| NM_001168334 | Gm2799        | -4.83296 | 1 | -6.27502 | 14.947  | 0.147339  | Down |
| NM_027059    | 1700023A16Rik | -4.82998 | 1 | -6.456   | 15.6095 | 0.113235  | Down |
| NM_027564    | 4921507P07Rik | -4.82933 | 1 | -5.22572 | 78.5613 | 1.96856   | Down |
| NM_001033471 | Cpxcr1        | -4.82914 | 1 | -6.57963 | 8.99545 | 0.0449818 | Down |
| NM_026261    | Ubl4b         | -4.8287  | 1 | -5.379   | 72.9345 | 1.61738   | Down |
| NM_133241    | Mlc1          | -4.82709 | 1 | -6.19903 | 14.2438 | 0.154124  | Down |
| NR_038002    | 1700027A15Rik | -4.82513 | 1 | -5.44073 | 196.682 | 4.14179   | Down |
| NM_028958    | Taf7l         | -4.82486 | 1 | -6.45093 | 10.1928 | 0.0742026 | Down |
| NM_001177510 | 4933402N22Rik | -4.81833 | 1 | -5.77489 | 44.6588 | 0.712726  | Down |
| NM_026458    | Abca14        | -4.80487 | 1 | -6.06605 | 7.49484 | 0.0933389 | Down |
| NM_025851    | 1700010I14Rik | -4.80424 | 1 | -5.21587 | 89.5098 | 2.25541   | Down |
| NM_011147    | Ppef1         | -4.80413 | 1 | -6.43047 | 7.83414 | 0.0578493 | Down |
| NM_207210    | Dyrk4         | -4.80413 | 1 | -6.43047 | 9.3798  | 0.0692629 | Down |
| NM_001177662 | Odf2          | -4.80108 | 1 | -5.02152 | 229.972 | 6.71057   | Down |
| NM_001081376 | Chd5          | -4.79408 | 1 | -5.5283  | 6.23019 | 0.12109   | Down |
| NM_001008547 | 1700001J03Rik | -4.7915  | 1 | -5.84667 | 61.2725 | 0.922763  | Down |
| NM_025753    | 4933425O20Rik | -4.78606 | 1 | -6.31241 | 20.9874 | 0.189089  | Down |
| NM_029121    | Atp6v1e2      | -4.7828  | 1 | -6.0956  | 35.852  | 0.428603  | Down |
| NR_003648    | Gm5334        | -4.78181 | 1 | -6.30821 | 15.3378 | 0.138593  | Down |
| NM_023543    | Chn2          | -4.78143 | 1 | -5.49594 | 23.0646 | 0.460025  | Down |
| NM_029911    | Kcnk10        | -4.77882 | 1 | -7.53    | 5.47528 | 0         | Down |
| NM_010085    | Adam26a       | -4.77733 | 1 | -6.14981 | 12.8698 | 0.144101  | Down |
| NM_016875    | Ybx2          | -4.77675 | 1 | -5.1624  | 119.111 | 3.12135   | Down |
| NM_030025    | Ccdc150       | -4.77339 | 1 | -5.99002 | 11.3134 | 0.150861  | Down |
| NM_025488    | 1700001K19Rik | -4.77184 | 1 | -5.39921 | 79.9935 | 1.73081   | Down |
| NM_027072    | Plac8l1       | -4.77148 | 1 | -6.52277 | 18.0855 | 0.0940904 | Down |
| NM_028514    | Actrt1        | -4.77148 | 1 | -7.52277 | 10.3056 | 0         | Down |
| NM_080442    | Tssk3         | -4.76973 | 1 | -5.38567 | 76.1635 | 1.66633   | Down |
| NM_019457    | Lrrc6         | -4.76428 | 1 | -5.44533 | 31.5023 | 0.654524  | Down |
| NM_172799    | Tll6          | -4.76395 | 1 | -5.98066 | 13.3473 | 0.179142  | Down |
| NM_172818    | Tll8          | -4.76151 | 1 | -6.02314 | 13.1611 | 0.168863  | Down |
| NM_026351    | Ttc39d        | -4.76066 | 1 | -5.28922 | 50.9864 | 1.20657   | Down |
| NM_029019    | Stard6        | -4.75864 | 1 | -5.32577 | 64.6723 | 1.48498   | Down |
| NM_026357    | Ribc2         | -4.7567  | 1 | -6.5082  | 8.26865 | 0.043457  | Down |
| NM_207228    | Tsga10        | -4.75421 | 1 | -5.15091 | 51.2038 | 1.35136   | Down |
| NR_026888    | 4930488L21Rik | -4.75111 | 1 | -6.01285 | 20.8854 | 0.269891  | Down |
| NM_016901    | Oaz3          | -4.75038 | 1 | -4.95479 | 537.298 | 16.431    | Down |
| NM_021497    | Pvrl3         | -4.74971 | 1 | -5.23054 | 65.3863 | 1.62022   | Down |
| NR_033786    | 1700052I22Rik | -4.74925 | 1 | -6.50086 | 36.0481 | 0.190427  | Down |
| NM_181816    | Ccdc67        | -4.74882 | 1 | -5.19721 | 45.7094 | 1.1629    | Down |
| NM_027042    | Lelp1         | -4.74815 | 1 | -5.34315 | 94.9266 | 2.14548   | Down |
| NM_010801    | Mlf1          | -4.74601 | 1 | -5.21686 | 113.032 | 2.83047   | Down |
| NM_029061    | Ccdc7         | -4.74575 | 1 | -6.05893 | 23.0783 | 0.283013  | Down |
| NM_031390    | Pramel3       | -4.74558 | 1 | -6.37265 | 5.08514 | 0.0390912 | Down |



|                |               |          |   |          |         |           |      |
|----------------|---------------|----------|---|----------|---------|-----------|------|
| NM_001145038_2 | Gm2933        | -4.74298 | 1 | -6.26985 | 13.6436 | 0.126615  | Down |
| NM_026469      | Tex13a        | -4.74298 | 1 | -6.26985 | 17.6217 | 0.163533  | Down |
| NM_029455      | 4930525F21Rik | -4.74007 | 1 | -5.91736 | 28.4612 | 0.404077  | Down |
| NM_001033774   | Gm1661        | -4.73948 | 1 | -6.1826  | 19.1717 | 0.201519  | Down |
| NM_001200025   | 1700015F17Rik | -4.73538 | 1 | -5.99728 | 54.1838 | 0.707798  | Down |
| NM_199312      | BC051628      | -4.7329  | 1 | -5.52035 | 37.5464 | 0.727787  | Down |
| NM_026489      | Hormad1       | -4.7298  | 1 | -6.25683 | 15.2208 | 0.142537  | Down |
| NM_199309      | Zdhhc19       | -4.71907 | 1 | -6.47111 | 10.1613 | 0.0548023 | Down |
| NM_028961      | 4933433C11Rik | -4.71592 | 1 | -6.08909 | 21.4927 | 0.251017  | Down |
| NM_031259      | Nxf2          | -4.71143 | 1 | -7.46357 | 5.58249 | 0         | Down |
| NM_001145803   | Mak           | -4.70993 | 1 | -5.34985 | 19.8396 | 0.443403  | Down |
| NM_029112      | Morn3         | -4.70896 | 1 | -5.53617 | 52.7772 | 1.00678   | Down |
| NM_029163      | Usp50         | -4.70383 | 1 | -5.75987 | 25.6763 | 0.410704  | Down |
| NM_027614      | Wdr20b        | -4.70309 | 1 | -5.35597 | 30.4672 | 0.676665  | Down |
| NM_177567      | BC049762      | -4.70131 | 1 | -5.3828  | 71.1926 | 1.54477   | Down |
| NM_001099333   | Gm2863        | -4.69932 | 1 | -6.07267 | 15.5746 | 0.183985  | Down |
| NM_011913      | Best1         | -4.69779 | 1 | -5.30335 | 37.1562 | 0.862043  | Down |
| NM_148943      | Usp9y         | -4.69601 | 1 | -7.44839 | 1.61876 | 0         | Down |
| NM_027083      | Lyzl6         | -4.68984 | 1 | -5.95223 | 42.2741 | 0.56977   | Down |
| NM_001164286   | Gm5415        | -4.68953 | 1 | -6.21706 | 5.9689  | 0.0574634 | Down |
| NM_0010103810  | Gm5591        | -4.68824 | 1 | -6.44073 | 3.78744 | 0.0208634 | Down |
| NM_027025      | Adora3        | -4.68652 | 1 | -6.13027 | 29.0772 | 0.316958  | Down |
| NM_027974      | Efhc1         | -4.68608 | 1 | -5.16724 | 52.7432 | 1.36559   | Down |
| NM_001195537   | Gm10345       | -4.68478 | 1 | -5.56725 | 25.4611 | 0.472568  | Down |
| NM_027032      | Pacrg         | -4.68197 | 1 | -5.24955 | 63.4694 | 1.53649   | Down |
| NM_001039889   | Smok3b        | -4.68043 | 0 | -7.43304 | 5.56108 | 0         | Down |
| NM_010892      | Nek2          | -4.68022 | 1 | -5.15633 | 36.9937 | 0.965596  | Down |
| NM_001085545   | Gm14345       | -4.67471 | 1 | -5.98868 | 17.0677 | 0.219768  | Down |
| NM_001085551   | Gm14346       | -4.67471 | 1 | -5.98868 | 17.0677 | 0.219768  | Down |
| NM_001085552   | Gm14351       | -4.67471 | 1 | -5.98868 | 17.1464 | 0.220782  | Down |
| NM_001167757   | Ankrd7        | -4.67471 | 1 | -5.98868 | 28.0878 | 0.361667  | Down |
| NM_001081363   | Cenpf         | -4.67356 | 1 | -5.0735  | 14.6066 | 0.406656  | Down |
| NM_001009547   | Adam26b       | -4.67258 | 1 | -7.4253  | 5.361   | 0         | Down |
| NM_001037718   | 4932415M13Rik | -4.67258 | 1 | -7.4253  | 6.50186 | 0         | Down |
| NM_026290      | 493051111Rik  | -4.67189 | 1 | -5.62986 | 40.5647 | 0.715957  | Down |
| NM_001164235   | 1700007B14Rik | -4.67127 | 1 | -6.19903 | 10.2234 | 0.0996635 | Down |
| NM_177576      | Sun3          | -4.67096 | 1 | -5.88865 | 33.3138 | 0.476621  | Down |
| NM_001008973   | Tmem232       | -4.67011 | 1 | -5.28668 | 28.4104 | 0.665759  | Down |
| NM_029367      | Spaca3        | -4.66666 | 1 | -6.19448 | 27.0552 | 0.264586  | Down |
| NR_033731      | 1700023I07Rik | -4.66666 | 1 | -6.19448 | 11.3054 | 0.110561  | Down |
| NM_198668      | 4930590J08Rik | -4.66558 | 1 | -5.97966 | 9.79191 | 0.126877  | Down |
| NM_153390      | Pxt1          | -4.66469 | 1 | -6.41753 | 12.634  | 0.07073   | Down |
| NM_001198597   | 9430070O13Rik | -4.6646  | 1 | -5.84267 | 20.0602 | 0.299962  | Down |
| NM_029066      | Wbp2nl        | -4.66321 | 1 | -6.10725 | 19.6705 | 0.217879  | Down |
| NM_001099275   | Tekt5         | -4.65946 | 1 | -5.97361 | 25.9234 | 0.337311  | Down |
| NM_029212      | Ccdc33        | -4.65496 | 1 | -5.41362 | 20.1032 | 0.421473  | Down |
| NM_175020      | Prss58        | -4.65331 | 1 | -5.96753 | 33.3989 | 0.436419  | Down |
| NM_177868      | Fhad1         | -4.65285 | 1 | -5.06197 | 36.0317 | 1.01043   | Down |
| NM_026648      | Lrrc50        | -4.65175 | 1 | -5.11831 | 42.6903 | 1.14519   | Down |
| NM_027945      | Csl           | -4.64886 | 1 | -5.27703 | 35.8808 | 0.845032  | Down |
| NM_030055      | Tmem210       | -4.64876 | 1 | -7.40185 | 24.5816 | 0         | Down |
| NR_029445      | 4930584F24Rik | -4.6481  | 1 | -6.17616 | 18.3032 | 0.18129   | Down |
| NM_001099917   | 2210404O07Rik | -4.64763 | 1 | -5.17682 | 165.93  | 4.24503   | Down |
| NM_001142631   | Spdya         | -4.64746 | 1 | -6.09169 | 20.567  | 0.230284  | Down |
| NM_001033362   | Gm614         | -4.64342 | 1 | -6.17155 | 29.0154 | 0.288317  | Down |
| NM_175488      | Ccdc38        | -4.64289 | 1 | -5.0291  | 46.4683 | 1.33565   | Down |
| NR_015532      | 1700108J01Rik | -4.63953 | 1 | -6.08385 | 54.5035 | 0.613598  | Down |
| NM_001166601   | Gm16430       | -4.63873 | 1 | -6.16692 | 30.864  | 0.307676  | Down |
| NM_001166646   | Gm16405       | -4.63873 | 1 | -6.16692 | 30.864  | 0.307676  | Down |
| NR_028486      | 1700001O22Rik | -4.63577 | 1 | -5.19522 | 87.3295 | 2.19768   | Down |
| NM_001034103   | Gm5941        | -4.63402 | 1 | -6.16227 | 38.5934 | 0.385973  | Down |
| NM_001033241   | Gm382         | -4.63267 | 1 | -6.38599 | 3.08224 | 0.0176391 | Down |
| NR_015512      | 4933406K04Rik | -4.63267 | 1 | -6.38599 | 9.27179 | 0.0530606 | Down |
| NM_001199996   | 4933402E13Rik | -4.62671 | 1 | -6.25538 | 8.73815 | 0.0728842 | Down |
| NM_027302      | Ctag2         | -4.62671 | 1 | -6.25538 | 20.0865 | 0.16754   | Down |
| NM_183139      | Pld6          | -4.62671 | 1 | -6.25538 | 9.73101 | 0.0811656 | Down |
| NM_026619      | Gsto2         | -4.62473 | 1 | -5.84292 | 29.7997 | 0.440098  | Down |
| NM_001033773   | Ube2u         | -4.62456 | 1 | -6.15293 | 14.104  | 0.141973  | Down |
| NM_027069      | 1700018F24Rik | -4.623   | 1 | -5.88615 | 31.8258 | 0.449095  | Down |
| NM_027955      | Gmcl1l        | -4.62038 | 1 | -5.99467 | 14.7229 | 0.183609  | Down |
| NM_001099688   | Fbxo39        | -4.62015 | 1 | -5.88332 | 20.7735 | 0.293709  | Down |
| NM_001168337   | Gm2825        | -4.61904 | 1 | -5.93366 | 16.5119 | 0.220895  | Down |
| NM_028851      | 1700080O16Rik | -4.61486 | 1 | -6.2437  | 11.7433 | 0.0987496 | Down |
| NR_004448      | 4930448K20Rik | -4.61486 | 1 | -6.2437  | 11.9154 | 0.100197  | Down |
| NM_198637      | 1700016K19Rik | -4.61315 | 1 | -5.49632 | 47.9754 | 0.935387  | Down |
| NM_031374      | Tex15         | -4.60201 | 1 | -5.01137 | 17.6387 | 0.512305  | Down |

|                |               |          |   |          |         |           |      |
|----------------|---------------|----------|---|----------|---------|-----------|------|
| NM_001177377   | Gm6760        | -4.59999 | 1 | -5.91484 | 52.7031 | 0.714338  | Down |
| NM_028087      | Gcnt3         | -4.59991 | 1 | -7.35375 | 2.85188 | 0         | Down |
| NM_001039557   | 4922505G16Rik | -4.59877 | 1 | -5.10258 | 29.1864 | 0.788456  | Down |
| NM_001168369   | 1700008F21Rik | -4.59422 | 1 | -5.85769 | 22.7023 | 0.326747  | Down |
| NM_027612      | 4921539E11Rik | -4.59275 | 1 | -5.27502 | 23.8386 | 0.557429  | Down |
| NM_001099295   | 1700042G07Rik | -4.58839 | 1 | -5.85193 | 88.7163 | 1.28198   | Down |
| NM_026096      | 1700054O13Rik | -4.58496 | 1 | -5.76389 | 73.8443 | 1.16628   | Down |
| NM_027048      | 1700008P02Rik | -4.58326 | 1 | -6.33736 | 15.389  | 0.0911053 | Down |
| NM_178755      | Agbl2         | -4.58066 | 1 | -5.53959 | 12.1389 | 0.228105  | Down |
| NM_183103      | Prss46        | -4.57873 | 1 | -6.20807 | 13.2511 | 0.114226  | Down |
| NM_001085523   | Gm14374       | -4.57854 | 1 | -6.02365 | 12.4807 | 0.146512  | Down |
| NM_028955      | 4933427G17Rik | -4.57745 | 1 | -5.89257 | 16.6182 | 0.228755  | Down |
| NM_029229      | 4930557A04Rik | -4.5763  | 1 | -6.10531 | 37.6342 | 0.391587  | Down |
| NM_177765      | Till13        | -4.57602 | 1 | -5.09884 | 30.8872 | 0.834779  | Down |
| NM_001033766   | 4930596D02Rik | -4.57485 | 1 | -7.32909 | 10.376  | 0         | Down |
| NM_013558      | Hspa1l        | -4.5737  | 1 | -4.86112 | 117.05  | 3.80507   | Down |
| NM_031172      | Trim17        | -4.56958 | 1 | -5.13786 | 47.3746 | 1.23925   | Down |
| NM_028889      | Efh1          | -4.56889 | 1 | -5.03589 | 63.0132 | 1.7898    | Down |
| NM_024445      | Tsnaxip1      | -4.56729 | 1 | -5.22113 | 27.9718 | 0.682177  | Down |
| NM_177742      | Trim1         | -4.56647 | 1 | -5.94143 | 14.9934 | 0.19403   | Down |
| NM_001163810   | 1700008P20Rik | -4.5661  | 1 | -5.52518 | 46.9601 | 0.89131   | Down |
| NM_001034100   | Gm5382        | -4.55791 | 1 | -6.31241 | 23.3676 | 0.140767  | Down |
| NM_001081330   | Dnahc2        | -4.55215 | 1 | -4.94143 | 11.4934 | 0.350992  | Down |
| NM_001081083   | Armc3         | -4.5498  | 1 | -5.72912 | 13.3336 | 0.215732  | Down |
| NM_001001185   | BC048507      | -4.54936 | 1 | -7.304   | 20.3921 | 0         | Down |
| NM_001081197   | Apobec4       | -4.54804 | 1 | -5.92323 | 17.49   | 0.229218  | Down |
| NM_029306      | 1700012B09Rik | -4.54804 | 1 | -5.92323 | 39.9844 | 0.524022  | Down |
| NM_001111037_2 | Gm14483       | -4.54698 | 1 | -5.76607 | 73.588  | 1.14636   | Down |
| NM_028086      | Mospd4        | -4.54654 | 1 | -6.07597 | 22.9679 | 0.24391   | Down |
| NM_175368      | 4933402P03Rik | -4.54609 | 1 | -5.06255 | 57.6963 | 1.60029   | Down |
| NM_023774      | 4930550L24Rik | -4.54075 | 1 | -7.29554 | 7.49243 | 0         | Down |
| NM_027635      | 4931423N10Rik | -4.54075 | 1 | -7.29554 | 6.39419 | 0         | Down |
| NM_019779      | Cyp11a1       | -4.5406  | 1 | -5.91589 | 15.3607 | 0.202342  | Down |
| NM_198655      | 4921509C19Rik | -4.5383  | 1 | -5.11563 | 28.2462 | 0.749496  | Down |
| NR_001584      | Speer8-ps1    | -4.53538 | 1 | -6.16537 | 14.4235 | 0.128084  | Down |
| NM_029287      | 1700006E09Rik | -4.5321  | 1 | -7.28702 | 16.7742 | 0         | Down |
| NM_177779      | Ccdc42        | -4.53143 | 1 | -6.06107 | 14.8349 | 0.159182  | Down |
| NM_023284      | Nuf2          | -4.52942 | 1 | -5.28916 | 19.5894 | 0.447761  | Down |
| NR_033788      | 1700109G14Rik | -4.52909 | 1 | -6.15916 | 20.1743 | 0.179927  | Down |
| NM_029195      | Ccdc146       | -4.52528 | 1 | -5.20807 | 16.431  | 0.402487  | Down |
| NR_003635      | 4933400A11Rik | -4.52275 | 1 | -6.15293 | 13.032  | 0.116733  | Down |
| NM_001177347   | 1700092M07Rik | -4.52198 | 1 | -5.74136 | 95.3693 | 1.51139   | Down |
| NM_001013767   | Capn11        | -4.5192  | 1 | -5.9651  | 9.12098 | 0.11152   | Down |
| NM_019395      | Fbp1          | -4.5184  | 1 | -4.83853 | 155.046 | 5.11003   | Down |
| NM_201365      | Fam178b       | -4.51775 | 1 | -5.11425 | 42.42   | 1.12376   | Down |
| NM_146050      | Oit1          | -4.51486 | 1 | -5.96082 | 18.7185 | 0.229547  | Down |
| NM_023781      | 1700020D05Rik | -4.51427 | 1 | -5.03094 | 89.4586 | 2.53629   | Down |
| NM_001099643   | Gm3750        | -4.51046 | 1 | -5.88615 | 17.8306 | 0.239783  | Down |
| NM_030106      | Tmsb15a       | -4.51003 | 1 | -6.14039 | 53.1438 | 0.480207  | Down |
| NM_001045516   | Proca1        | -4.50942 | 1 | -5.33853 | 28.1904 | 0.616842  | Down |
| NM_001085553_3 | Gm10921       | -4.50764 | 1 | -5.82362 | 15.2187 | 0.219768  | Down |
| NM_001081246   | 1700017N19Rik | -4.50589 | 1 | -6.03589 | 11.6705 | 0.12744   | Down |
| NM_026223      | Glpr1l2       | -4.50583 | 1 | -6.26118 | 6.11992 | 0.038207  | Down |
| NM_177880      | 4933411G11Rik | -4.50583 | 1 | -7.26118 | 5.3287  | 0         | Down |
| NM_001195189   | 4930469G21Rik | -4.50507 | 1 | -5.72465 | 37.5494 | 0.602021  | Down |
| NM_029309      | Morn5         | -4.50423 | 1 | -5.82026 | 43.1288 | 0.624269  | Down |
| NM_172125      | Adam1b        | -4.5031  | 1 | -4.91938 | 46.6633 | 1.44379   | Down |
| NM_148937      | Plcd4         | -4.50291 | 1 | -5.56114 | 13.1156 | 0.240828  | Down |
| NM_183406      | Cox6b2        | -4.50028 | 1 | -5.15463 | 128.048 | 3.2703    | Down |
| NM_029305      | 1700003F12Rik | -4.49739 | 1 | -5.8135  | 40.4086 | 0.587648  | Down |
| NM_020487      | Prss21        | -4.49554 | 1 | -6.0257  | 18.1836 | 0.199975  | Down |
| NM_053216      | 1700102P08Rik | -4.4951  | 1 | -5.55342 | 35.4177 | 0.653834  | Down |
| NR_026924      | 1700020N18Rik | -4.49034 | 1 | -6.02057 | 35.74   | 0.394456  | Down |
| NM_177859      | Aknad1        | -4.48803 | 1 | -6.2437  | 4.36418 | 0.0275801 | Down |
| NM_001195748   | Rgs22         | -4.48298 | 1 | -4.80035 | 55.0345 | 1.86284   | Down |
| NM_001033874   | Ak8           | -4.48106 | 1 | -5.36561 | 25.702  | 0.548721  | Down |
| NM_153099      | Prss42        | -4.47906 | 1 | -6.23487 | 7.26061 | 0.0461678 | Down |
| NM_026625      | 1700067P10Rik | -4.47768 | 1 | -6.10854 | 19.5737 | 0.180834  | Down |
| NM_152818      | Osbp2         | -4.47513 | 1 | -4.72946 | 81.5324 | 2.90879   | Down |
| NM_029627      | Ly6k          | -4.47354 | 1 | -5.6935  | 45.35   | 0.742985  | Down |
| NM_025487      | 1700011A15Rik | -4.47112 | 1 | -6.10208 | 17.1338 | 0.159005  | Down |
| NM_178418      | Ccdc144b      | -4.47112 | 1 | -6.10208 | 6.24368 | 0.0579427 | Down |
| NM_020622      | Fam3b         | -4.47003 | 1 | -6.226   | 13.1852 | 0.0843607 | Down |
| NR_024051      | Abca16        | -4.46978 | 1 | -5.73477 | 6.30581 | 0.0988467 | Down |
| NM_182694      | Ggn           | -4.46893 | 1 | -5.18586 | 18.5988 | 0.460025  | Down |
| NM_001025260   | Gm14484       | -4.46606 | 1 | -5.64637 | 76.3236 | 1.30793   | Down |

|              |               |          |   |          |          |            |      |
|--------------|---------------|----------|---|----------|----------|------------|------|
| NM_027164    | Lrrc27        | -4.46533 | 1 | -4.87226 | 64.9629  | 2.07843    | Down |
| NM_178671    | Ubxn10        | -4.46522 | 1 | -4.90306 | 40.8767  | 1.27672    | Down |
| NM_027026    | Lrrc46        | -4.46156 | 1 | -4.78492 | 161.722  | 5.53089    | Down |
| NR_030547    | Mir147        | -4.46093 | 1 | -7.21706 | 141.15   | 0          | Down |
| NM_030071    | 4921528O07Rik | -4.45915 | 1 | -5.77576 | 9.76078  | 0.145719   | Down |
| NM_029916    | Stk31         | -4.45898 | 1 | -5.67912 | 10.7187  | 0.177371   | Down |
| NM_139301    | Catsper1      | -4.45874 | 1 | -5.98943 | 9.26534  | 0.104499   | Down |
| NM_198666    | Gm9758        | -4.45806 | 1 | -5.51683 | 32.8251  | 0.621567   | Down |
| NM_027732    | Dmrtc2        | -4.45792 | 1 | -6.08909 | 9.47032  | 0.0886856  | Down |
| NM_001122661 | Speer4e       | -4.45213 | 1 | -5.21257 | 36.0558  | 0.86914    | Down |
| NM_001200013 | 1700013H16Rik | -4.45127 | 1 | -6.08254 | 12.4696  | 0.117306   | Down |
| NM_001177408 | Gm15319       | -4.4494  | 1 | -4.80839 | 68.0573  | 2.28452    | Down |
| NM_019872    | Dmrtb1        | -4.44646 | 1 | -4.84175 | 79.4771  | 2.59967    | Down |
| NM_001159960 | Pde1c         | -4.44511 | 1 | -4.84615 | 15.8999  | 0.518257   | Down |
| NM_028826    | Sept14        | -4.4446  | 1 | -6.07597 | 8.9953   | 0.08501    | Down |
| NM_173409    | 4933402N03Rik | -4.44258 | 1 | -7.19903 | 9.48448  | 0          | Down |
| NM_053253    | Zmynd10       | -4.43649 | 1 | -5.13607 | 28.7041  | 0.737158   | Down |
| NM_017407    | Spag5         | -4.4357  | 1 | -5.15293 | 12.6184  | 0.319321   | Down |
| NM_001031621 | Abca17        | -4.43448 | 1 | -5.13407 | 9.65948  | 0.248412   | Down |
| NM_029937    | Nup210l       | -4.43377 | 1 | -5.26367 | 7.12755  | 0.164281   | Down |
| NM_025759    | Speer4d       | -4.43187 | 1 | -5.96296 | 16.1755  | 0.185827   | Down |
| NM_001162364 | Gm14525       | -4.43115 | 1 | -6.06273 | 16.8763  | 0.160966   | Down |
| NM_011583    | Theg          | -4.43002 | 1 | -5.16719 | 36.8273  | 0.91966    | Down |
| NM_027633    | 4931417G12Rik | -4.42995 | 1 | -5.8771  | 16.2685  | 0.211461   | Down |
| NM_177256    | Prdx6-ps1     | -4.42875 | 1 | -4.80832 | 52.6376  | 1.76433    | Down |
| NM_178776    | BC049715      | -4.42507 | 1 | -5.60588 | 32.2131  | 0.567767   | Down |
| NM_029144    | 4930503B20Rik | -4.4193  | 1 | -4.84279 | 121.585  | 3.96479    | Down |
| NM_027298    | Ccdc89        | -4.41805 | 1 | -4.90075 | 41.1405  | 1.28144    | Down |
| NM_025290    | Rsp1          | -4.41705 | 1 | -4.68587 | 248.629  | 9.13591    | Down |
| NM_001164519 | Ctnna3        | -4.41607 | 1 | -5.86343 | 7.70549  | 0.101114   | Down |
| NM_207268    | Ccdc87        | -4.4155  | 1 | -5.94684 | 5.86099  | 0.0680913  | Down |
| NR_027978    | 4930465K10Rik | -4.41461 | 1 | -7.17155 | 8.55975  | 0          | Down |
| NM_001039553 | 4930467E23Rik | -4.41359 | 1 | -4.82709 | 49.5845  | 1.63602    | Down |
| NM_001039593 | 1700015E13Rik | -4.41358 | 1 | -5.2437  | 56.0085  | 1.30895    | Down |
| NM_172914    | Ccdc113       | -4.40902 | 1 | -5.46837 | 28.8422  | 0.564838   | Down |
| NM_024279    | Spaca7        | -4.40516 | 1 | -7.16227 | 14.1034  | 0          | Down |
| NM_029714    | Catsperg2     | -4.39944 | 1 | -4.80368 | 33.5167  | 1.12485    | Down |
| NM_008574    | Smcp          | -4.39803 | 1 | -4.70485 | 249.922  | 9.04453    | Down |
| NM_007630    | Ccnb2         | -4.39655 | 1 | -4.98418 | 43.3263  | 1.25786    | Down |
| NM_177655    | Cst1          | -4.39003 | 1 | -6.02228 | 23.9927  | 0.23538    | Down |
| NM_183181    | Abhd16b       | -4.3878  | 1 | -5.91957 | 10.2478  | 0.121337   | Down |
| NM_175032    | Galnt6        | -4.38695 | 1 | -5.608   | 6.49134  | 0.112857   | Down |
| NR_038129    | 1700085B03Rik | -4.38608 | 1 | -7.14353 | 13.2251  | 0          | Down |
| NM_011449    | Spa17         | -4.38463 | 1 | -4.68771 | 326.648  | 11.9652    | Down |
| NM_027689    | Rfx4          | -4.38317 | 1 | -5.831   | 6.53504  | 0.0877104  | Down |
| NM_029674    | Got111        | -4.38317 | 1 | -5.831   | 15.7786  | 0.211773   | Down |
| NM_153052    | Gzmn          | -4.37645 | 1 | -7.13407 | 11.0311  | 0          | Down |
| NM_008757    | Odf1          | -4.37437 | 1 | -4.60514 | 340.455  | 13.2537    | Down |
| NM_027759    | Fsip1         | -4.37328 | 1 | -5.33461 | 21.7869  | 0.472027   | Down |
| NM_001081393 | Armc4         | -4.372   | 1 | -5.05607 | 14.4116  | 0.3923     | Down |
| NM_008021    | Foxm1         | -4.36592 | 1 | -5.25179 | 8.54198  | 0.197363   | Down |
| NM_008291    | Hsd17b3       | -4.35697 | 1 | -6.11496 | 8.07484  | 0.055825   | Down |
| NR_027988    | 4930433N12Rik | -4.35697 | 1 | -7.11496 | 7.51393  | 0          | Down |
| NM_183141    | Elfn2         | -4.35696 | 1 | -5.53863 | 7.19725  | 0.132919   | Down |
| NM_021294    | Dbil5         | -4.35433 | 1 | -4.60549 | 549.059  | 21.35      | Down |
| NM_001164166 | Pom121l12     | -4.35385 | 1 | -5.88615 | 16.5011  | 0.199975   | Down |
| NR_033171    | 4930403L05Rik | -4.3477  | 1 | -5.98066 | 15.7272  | 0.15883    | Down |
| NM_001085387 | Myl10         | -4.34715 | 1 | -6.10531 | 16.9927  | 0.118272   | Down |
| NR_027968    | 1700020N01Rik | -4.34558 | 1 | -5.66375 | 25.1578  | 0.405981   | Down |
| NM_181589    | Ckap2l        | -4.34296 | 1 | -5.13407 | 12.6411  | 0.320393   | Down |
| NM_001160386 | Dnahc7b       | -4.33996 | 1 | -4.68757 | 13.7202  | 0.50122    | Down |
| NM_013588    | Lrrc23        | -4.339   | 1 | -4.99467 | 35.9369  | 1.02559    | Down |
| NM_027744    | 4933437F05Rik | -4.33649 | 1 | -5.03696 | 33.267   | 0.915182   | Down |
| NM_001145759 | 4930571K23Rik | -4.33597 | 1 | -4.57308 | 161.721  | 6.43551    | Down |
| NM_001195726 | Fam181a       | -4.33241 | 1 | -5.71057 | 16.8036  | 0.255302   | Down |
| NM_010353    | Gsg2          | -4.3319  | 1 | -4.58895 | 105.866  | 4.16291    | Down |
| NM_001085554 | Gm10922       | -4.33026 | 1 | -5.64865 | 13.4763  | 0.219768   | Down |
| NM_027103    | 1700030J22Rik | -4.33002 | 1 | -4.73769 | 41.9659  | 1.474      | Down |
| NM_028959    | Cep72         | -4.32764 | 1 | -4.83316 | 23.0647  | 0.751117   | Down |
| NM_001193631 | Prss51        | -4.32728 | 1 | -6.08582 | 10.6102  | 0.0748602  | Down |
| NM_021408    | Ush2a         | -4.32607 | 1 | -5.95939 | 0.881634 | 0.00903656 | Down |
| NM_001024727 | Gm16387       | -4.32493 | 1 | -5.85769 | 5.87432  | 0.0726139  | Down |
| NR_027848    | 4930479M11Rik | -4.32377 | 1 | -5.70206 | 33.6002  | 0.513526   | Down |
| NM_029590    | 1700010D01Rik | -4.32083 | 1 | -5.54277 | 63.2683  | 1.15096    | Down |
| NR_002846    | Nespas        | -4.31879 | 1 | -5.95223 | 6.20044  | 0.063871   | Down |
| NM_001081657 | Gm5935        | -4.31723 | 1 | -6.07597 | 11.5491  | 0.0820468  | Down |

|              |               |          |   |          |         |           |      |
|--------------|---------------|----------|---|----------|---------|-----------|------|
| NM_030609    | Hist1h1a      | -4.31301 | 1 | -4.88314 | 89.2853 | 2.78707   | Down |
| NM_001081121 | 4931429111Rik | -4.31113 | 1 | -5.5332  | 10.2222 | 0.187199  | Down |
| NM_028113    | Fam123a       | -4.30729 | 1 | -5.84034 | 6.33339 | 0.0792395 | Down |
| NM_027066    | Tmem89        | -4.30714 | 1 | -6.06605 | 18.6539 | 0.13344   | Down |
| NM_031388    | Usp26         | -4.30714 | 1 | -6.06605 | 2.42821 | 0.0173702 | Down |
| NM_001004061 | Fam170a       | -4.30502 | 1 | -5.75404 | 15.1123 | 0.213982  | Down |
| NM_029252    | 4930563D23Rik | -4.30468 | 1 | -4.68489 | 52.1071 | 1.90263   | Down |
| NM_023370    | Cdh23         | -4.30137 | 1 | -5.52358 | 2.94812 | 0.0543511 | Down |
| NR_028320    | AU015836      | -4.29695 | 1 | -6.05607 | 3.32203 | 0.0239303 | Down |
| NM_008613    | Mns1          | -4.29071 | 1 | -4.82935 | 40.3039 | 1.31107   | Down |
| NM_001146299 | Sh3rf2        | -4.29045 | 1 | -4.8523  | 14.1017 | 0.450194  | Down |
| NM_001080995 | 4632434111Rik | -4.28815 | 1 | -4.78244 | 24.6522 | 0.8326    | Down |
| NM_009548    | Rnf112        | -4.2867  | 1 | -6.04602 | 3.33549 | 0.0241965 | Down |
| NM_001177867 | Sgol2         | -4.28167 | 1 | -5.02027 | 9.62173 | 0.266077  | Down |
| NM_011902    | Tekt2         | -4.28164 | 1 | -5.50412 | 20.572  | 0.384423  | Down |
| NM_001081253 | Fbxo43        | -4.2793  | 1 | -5.59843 | 6.32159 | 0.106752  | Down |
| NM_001164739 | Fam47a-ps     | -4.27637 | 1 | -7.03589 | 5.96281 | 0         | Down |
| NM_001167705 | Serpina3a     | -4.27637 | 1 | -6.03589 | 5.27184 | 0.0385145 | Down |
| NM_011497    | Aurka         | -4.27477 | 1 | -4.82866 | 35.9623 | 1.16825   | Down |
| NM_178386    | Slc25a31      | -4.27459 | 1 | -5.72409 | 9.4135  | 0.136097  | Down |
| NM_146126    | Sord          | -4.27135 | 1 | -4.44478 | 269.701 | 11.7586   | Down |
| NM_172258    | Slc36a3       | -4.26945 | 1 | -5.71904 | 11.2587 | 0.163347  | Down |
| NM_016685    | Comp          | -4.26728 | 1 | -5.58658 | 10.4281 | 0.177554  | Down |
| NM_177593    | Gm4763        | -4.26598 | 1 | -6.0257  | 11.0624 | 0.0813957 | Down |
| NM_001033455 | Ccdc27        | -4.26424 | 1 | -4.92057 | 24.0782 | 0.723422  | Down |
| NR_003625    | 1700073E17Rik | -4.25921 | 1 | -5.57864 | 5.47057 | 0.0936608 | Down |
| NM_001111144 | Gm381         | -4.2555  | 1 | -6.01543 | 4.75568 | 0.0352435 | Down |
| NM_001113734 | Mageb16       | -4.2555  | 1 | -7.01543 | 5.61584 | 0         | Down |
| NM_029660    | Rbmxl2        | -4.2555  | 1 | -6.01543 | 6.58106 | 0.048771  | Down |
| NM_029587    | 1700012A03Rik | -4.25457 | 1 | -4.76061 | 87.059  | 2.98148   | Down |
| NM_026136    | 4930449I24Rik | -4.25307 | 1 | -5.78701 | 14.2011 | 0.184395  | Down |
| NM_019871    | Amac1         | -4.25272 | 1 | -5.6321  | 14.9242 | 0.239463  | Down |
| NM_028687    | 4930403N07Rik | -4.25221 | 1 | -4.736   | 32.8325 | 1.14647   | Down |
| NM_001199956 | Gm9839        | -4.25151 | 1 | -5.88615 | 9.26329 | 0.0999178 | Down |
| NM_028158    | 1700021F07Rik | -4.24872 | 1 | -5.69864 | 30.4431 | 0.447994  | Down |
| NM_001160150 | Amy2a4        | -4.24385 | 1 | -5.87861 | 3.55672 | 0.0385662 | Down |
| NM_001160151 | Amy2a3        | -4.24385 | 1 | -5.87861 | 3.55672 | 0.0385662 | Down |
| NM_001160152 | Amy2a2        | -4.24385 | 1 | -5.87861 | 3.55672 | 0.0385662 | Down |
| NM_025763    | 4933436I01Rik | -4.24385 | 1 | -5.87861 | 9.28588 | 0.100689  | Down |
| NM_148940    | Prss44        | -4.23432 | 1 | -6.99467 | 5.19474 | 0         | Down |
| NM_029690    | Arpm1         | -4.22626 | 1 | -5.40971 | 16.9075 | 0.3415    | Down |
| NM_001081476 | Gm14725       | -4.22362 | 1 | -6.98418 | 11.4471 | 0         | Down |
| NM_026100    | Tctex1d1      | -4.22308 | 1 | -5.40657 | 15.7316 | 0.318442  | Down |
| NM_001204983 | Gm9766        | -4.22053 | 1 | -4.55126 | 63.7104 | 2.5611    | Down |
| NR_037690    | Gm4776        | -4.21574 | 1 | -5.75033 | 4.80784 | 0.0640419 | Down |
| NM_031185    | Akap12        | -4.2145  | 1 | -4.31723 | 260.866 | 12.6059   | Down |
| NM_001085543 | Gm14347       | -4.214   | 1 | -5.53412 | 12.4452 | 0.219768  | Down |
| NM_001172152 | Wdr17         | -4.21282 | 1 | -6.97361 | 2.27534 | 0         | Down |
| NM_010623    | Kif17         | -4.21117 | 1 | -4.70601 | 20.5964 | 0.733497  | Down |
| NR_015496    | 1700031M16Rik | -4.20982 | 1 | -5.53    | 29.518  | 0.52275   | Down |
| NM_001033465 | 6430531B16Rik | -4.20241 | 1 | -5.47111 | 22.9909 | 0.432848  | Down |
| NM_001033807 | 4930567H17Rik | -4.20195 | 1 | -6.96296 | 11.1177 | 0         | Down |
| NM_029158    | Zcchc13       | -4.20097 | 1 | -5.65168 | 17.504  | 0.266139  | Down |
| NM_028392    | Ppp2r2b       | -4.19723 | 1 | -4.96029 | 18.4794 | 0.530737  | Down |
| NM_001129886 | Gm10731       | -4.19204 | 1 | -4.55027 | 80.1893 | 3.21986   | Down |
| NM_001164669 | Dnahc6        | -4.18851 | 1 | -4.52269 | 13.012  | 0.533424  | Down |
| NM_025719    | Nkapl         | -4.18612 | 1 | -4.83019 | 33.8645 | 1.0855    | Down |
| NM_183099    | Tssk5         | -4.17996 | 1 | -6.94143 | 6.07627 | 0         | Down |
| NM_029286    | Ccdc30        | -4.17974 | 1 | -4.63138 | 36.8251 | 1.38713   | Down |
| NM_172126    | Adam1a        | -4.17929 | 1 | -4.51023 | 53.8926 | 2.22896   | Down |
| NM_028673    | Zdbf2         | -4.17904 | 1 | -4.81096 | 4.02    | 0.130829  | Down |
| NM_001001492 | Lca5l         | -4.17828 | 1 | -4.61407 | 31.4388 | 1.20029   | Down |
| NM_001033668 | Dnahc1        | -4.17624 | 1 | -4.52469 | 11.7274 | 0.479648  | Down |
| NM_001081348 | Hecw1         | -4.17374 | 1 | -5.62491 | 1.95965 | 0.0303556 | Down |
| NM_001134733 | CK137956      | -4.17374 | 1 | -5.62491 | 8.39218 | 0.129997  | Down |
| NM_183166    | Gm4884        | -4.17289 | 1 | -5.80898 | 4.42301 | 0.0503443 | Down |
| NM_001177877 | 1700108M19Rik | -4.16884 | 1 | -6.93054 | 9.77492 | 0         | Down |
| NM_009571    | Zfy2          | -4.16884 | 1 | -6.93054 | 3.24211 | 0         | Down |
| NM_028847    | Mageb5        | -4.16884 | 1 | -5.93054 | 7.29798 | 0.0573869 | Down |
| NM_001081262 | Fam194a       | -4.16766 | 1 | -5.43689 | 11.8748 | 0.228946  | Down |
| NM_001162880 | 1700007E06Rik | -4.1627  | 1 | -5.61407 | 38.3311 | 0.598258  | Down |
| NM_027942    | Ddi1          | -4.1627  | 1 | -4.61032 | 61.7608 | 2.36155   | Down |
| NM_183113    | 4932414N04Rik | -4.1616  | 1 | -4.92506 | 10.0436 | 0.295598  | Down |
| NM_025850    | Fank1         | -4.15801 | 1 | -4.82922 | 22.772  | 0.727365  | Down |
| NM_029290    | 1700011I03Rik | -4.15789 | 1 | -5.6935  | 16.0719 | 0.222723  | Down |
| NM_030224    | Fndc8         | -4.15786 | 1 | -5.34229 | 14.6687 | 0.310485  | Down |

|              |               |          |   |          |          |            |      |
|--------------|---------------|----------|---|----------|----------|------------|------|
| NM_027668    | 4933412E24Rik | -4.15764 | 1 | -6.91957 | 5.16833  | 0          | Down |
| NM_028528    | 1700058C13Rik | -4.15715 | 1 | -5.60861 | 16.739   | 0.26225    | Down |
| NM_001163569 | Kif9          | -4.15634 | 1 | -4.64611 | 25.0604  | 0.930876   | Down |
| NM_198414    | Paqr9         | -4.15131 | 1 | -5.68705 | 6.71229  | 0.0934373  | Down |
| NM_023223    | Cdc20         | -4.1508  | 1 | -4.78298 | 27.8928  | 0.925556   | Down |
| NM_001034878 | Dnaic2        | -4.148   | 1 | -5.41753 | 8.9574   | 0.175039   | Down |
| NM_001037919 | Gm6460        | -4.14781 | 1 | -5.3324  | 36.9262  | 0.78699    | Down |
| NM_028529    | Nipsnap3a     | -4.14635 | 1 | -5.90851 | 8.18052  | 0.0653239  | Down |
| NM_175522    | Elfn1         | -4.14635 | 1 | -5.90851 | 2.34491  | 0.0187248  | Down |
| NM_001115074 | Gm101         | -4.1447  | 1 | -5.68056 | 6.13387  | 0.0857718  | Down |
| NM_001025085 | Gm5797        | -4.14405 | 1 | -5.52518 | 20.831   | 0.360035   | Down |
| NM_027622    | Tex19.2       | -4.13807 | 1 | -5.67405 | 7.49386  | 0.105265   | Down |
| NM_028499    | Lrrc69        | -4.13544 | 1 | -5.36008 | 22.9814  | 0.474651   | Down |
| NM_031260    | Mov1011       | -4.13511 | 1 | -5.1982  | 7.49904  | 0.177174   | Down |
| NM_031163    | Col2a1        | -4.13495 | 1 | -6.89737 | 1.73791  | 0          | Down |
| NM_183131    | 4930451111Rik | -4.13495 | 1 | -5.89737 | 18.7804  | 0.151139   | Down |
| NM_171824    | Pgbd5         | -4.12908 | 1 | -5.58103 | 6.36713  | 0.101687   | Down |
| NM_016964    | Stag3         | -4.12889 | 1 | -4.57676 | 21.6925  | 0.848994   | Down |
| NM_025732    | Ankrd61       | -4.12445 | 1 | -4.66442 | 43.4183  | 1.58362    | Down |
| NM_001166210 | Myh15         | -4.12349 | 1 | -5.88615 | 1.39606  | 0.0113235  | Down |
| NM_176954    | Celf5         | -4.12349 | 1 | -5.88615 | 2.01617  | 0.0163533  | Down |
| NR_023357    | Gm6981        | -4.12169 | 1 | -4.95531 | 22.296   | 0.636618   | Down |
| NM_007491    | Art5          | -4.12072 | 1 | -5.34558 | 16.0611  | 0.33508    | Down |
| NM_010181    | Fbn2          | -4.11683 | 1 | -4.78845 | 4.16961  | 0.137006   | Down |
| NM_025281    | Lyar          | -4.11565 | 1 | -4.40821 | 130.04   | 5.78586    | Down |
| NM_031386    | Tex14         | -4.11354 | 1 | -5.00269 | 6.58447  | 0.180872   | Down |
| NM_001004192 | BC048562      | -4.11192 | 1 | -6.87483 | 12.7821  | 0          | Down |
| NM_010416    | Hemt1         | -4.11192 | 1 | -5.87483 | 10.9356  | 0.0894035  | Down |
| NM_175223    | Dnal1         | -4.1107  | 1 | -4.57148 | 41.2277  | 1.61753    | Down |
| NM_029042    | 4930435E12Rik | -4.10782 | 1 | -5.378   | 18.2893  | 0.367351   | Down |
| NM_009603    | Chrne         | -4.10622 | 1 | -5.55857 | 11.1263  | 0.180493   | Down |
| NM_008793    | Pcsk4         | -4.10531 | 1 | -4.84581 | 14.6372  | 0.456904   | Down |
| NM_027687    | Cabyr         | -4.10512 | 1 | -4.49157 | 55.8527  | 2.3311     | Down |
| NR_038009    | 2810408I11Rik | -4.10377 | 1 | -4.99306 | 43.6925  | 1.20826    | Down |
| NM_029056    | Tdrd9         | -4.10154 | 1 | -4.78822 | 8.65184  | 0.283641   | Down |
| NM_001039240 | Gm7073        | -4.09828 | 1 | -5.73581 | 8.44763  | 0.101185   | Down |
| NM_027018    | Glipr11       | -4.09761 | 1 | -5.63434 | 16.6454  | 0.240372   | Down |
| NM_009936    | Col9a3        | -4.09555 | 1 | -5.36593 | 8.71774  | 0.176577   | Down |
| NM_198677    | BC061237      | -4.08975 | 1 | -5.72745 | 13.2564  | 0.159713   | Down |
| NM_001127340 | Acrbp         | -4.0893  | 1 | -4.56422 | 63.7145  | 2.50898    | Down |
| NM_028859    | 1700106J16Rik | -4.0885  | 1 | -5.85193 | 7.08936  | 0.0588933  | Down |
| NM_027544    | Ggnbp1        | -4.08789 | 1 | -4.44671 | 88.3844  | 3.81316    | Down |
| NM_028494    | 1700034I23Rik | -4.0775  | 1 | -4.38713 | 75.3397  | 3.39821    | Down |
| NM_009013    | Rad51ap1      | -4.07712 | 1 | -5.53    | 9.45697  | 0.156493   | Down |
| NM_019467    | Aif1          | -4.07706 | 1 | -4.42234 | 164.396  | 7.22012    | Down |
| NM_015768    | Prok2         | -4.07252 | 1 | -5.71057 | 7.7846   | 0.0948988  | Down |
| NM_027708    | Fbxo24        | -4.06583 | 1 | -4.6873  | 22.467   | 0.798047   | Down |
| NM_001109045 | Aqp8          | -4.06471 | 1 | -6.82866 | 5.73334  | 0          | Down |
| NR_026798    | Zfp389        | -4.06471 | 1 | -5.82866 | 9.10336  | 0.076864   | Down |
| NM_026150    | 4921536K21Rik | -4.06428 | 1 | -4.7675  | 14.881   | 0.493597   | Down |
| NM_175503    | Aard          | -4.06199 | 1 | -4.74909 | 30.0383  | 1.01189    | Down |
| NM_197959    | Kif18b        | -4.05994 | 1 | -5.38257 | 6.58072  | 0.12912    | Down |
| NM_145745    | Adam34        | -4.05938 | 1 | -5.51258 | 6.83864  | 0.114545   | Down |
| NM_011623    | Top2a         | -4.05527 | 1 | -4.34924 | 36.8169  | 1.70636    | Down |
| NM_001037743 | 4921506M07Rik | -4.05509 | 1 | -5.6935  | 7.86932  | 0.0970804  | Down |
| NM_001195255 | Gm581         | -4.05509 | 1 | -5.6935  | 6.2007   | 0.0764954  | Down |
| NM_011773    | Slc30a3       | -4.05392 | 1 | -4.68705 | 23.2658  | 0.825184   | Down |
| NM_026099    | 1700065I17Rik | -4.05342 | 1 | -5.50673 | 30.2744  | 0.509156   | Down |
| NM_001114612 | Stxbp5l       | -4.05265 | 1 | -5.81688 | 0.703382 | 0.00598807 | Down |
| NM_027655    | 4933405L10Rik | -4.05265 | 1 | -5.81688 | 7.50253  | 0.063871   | Down |
| NM_031382    | Tex16         | -4.05265 | 1 | -5.81688 | 2.12307  | 0.0180743  | Down |
| NM_199024    | Nol4          | -4.05251 | 1 | -5.27846 | 5.22558  | 0.114226   | Down |
| NM_001171615 | Myt1          | -4.04051 | 1 | -5.80501 | 1.57647  | 0.0135327  | Down |
| NM_028589    | 1700125H20Rik | -4.04051 | 1 | -6.80501 | 8.57759  | 0          | Down |
| NR_033580    | 4933401B06Rik | -4.04051 | 1 | -6.80501 | 6.86067  | 0          | Down |
| NM_001024614 | 1700007G11Rik | -4.03745 | 1 | -5.67622 | 13.3558  | 0.166762   | Down |
| NM_026135    | Kctd16        | -4.03745 | 1 | -5.67622 | 8.42442  | 0.105188   | Down |
| NM_207275    | Banf2         | -4.03745 | 1 | -5.67622 | 21.8619  | 0.272969   | Down |
| NM_025610    | Asrgl1        | -4.03712 | 1 | -4.21261 | 224.403  | 11.4916    | Down |
| NM_030192    | 4930562C15Rik | -4.03516 | 1 | -4.86995 | 8.04499  | 0.243741   | Down |
| NM_001163793 | C530008M17Rik | -4.034   | 1 | -4.43458 | 15.4986  | 0.67222    | Down |
| NM_001024954 | Pbx4          | -4.03183 | 1 | -5.41492 | 14.2801  | 0.266485   | Down |
| NM_001029929 | Zmynd15       | -4.03106 | 1 | -4.75239 | 13.0379  | 0.435718   | Down |
| NM_145508    | Dyrk3         | -4.02982 | 1 | -4.46665 | 43.4235  | 1.83635    | Down |
| NM_030189    | 4930555I21Rik | -4.02931 | 1 | -5.48308 | 7.05714  | 0.120657   | Down |
| NR_026896    | 4931440L10Rik | -4.02931 | 1 | -5.48308 | 11.5278  | 0.197093   | Down |

|              |               |          |   |          |         |           |      |
|--------------|---------------|----------|---|----------|---------|-----------|------|
| NM_001042711 | Amy2a5        | -4.02856 | 1 | -5.6675  | 7.24771 | 0.0910475 | Down |
| NM_001033764 | 4931408C20Rik | -4.02065 | 1 | -4.66636 | 10.1538 | 0.364674  | Down |
| NM_001031772 | Lin28b        | -4.01589 | 1 | -5.78096 | 1.52207 | 0.0132872 | Down |
| NM_031870    | Msh4          | -4.01589 | 1 | -5.78096 | 2.47183 | 0.0215783 | Down |
| NR_027636    | Wdr69         | -4.01589 | 1 | -5.78096 | 4.99015 | 0.0435625 | Down |
| NM_001098842 | Gm6812        | -4.01097 | 1 | -5.46508 | 31.4742 | 0.544903  | Down |
| NR_027801    | Gm1141        | -4.01097 | 1 | -5.46508 | 7.72203 | 0.133689  | Down |
| NM_027728    | Enkur         | -4.01049 | 1 | -4.51258 | 57.3703 | 2.33515   | Down |
| NM_177696    | Gdpd4         | -4.00585 | 1 | -5.54436 | 4.59288 | 0.0706141 | Down |
| NM_183290    | 4921517D22Rik | -4.0048  | 1 | -5.45903 | 5.25691 | 0.0913953 | Down |
| NM_027724    | Cage1         | -4.00414 | 1 | -4.23962 | 99.1747 | 4.97362   | Down |
| NM_001013382 | Lrrc52        | -4.00151 | 1 | -5.64103 | 9.86857 | 0.126281  | Down |
| NM_001101501 | Gm15104       | -4.00151 | 1 | -5.64103 | 27.1028 | 0.346816  | Down |
| NM_207248    | 4930433111Rik | -3.99861 | 1 | -5.45296 | 8.13429 | 0.14202   | Down |
| NM_177702    | 4833427G06Rik | -3.99441 | 1 | -5.05971 | 35.6108 | 0.926335  | Down |
| NR_038149    | 1700016P04Rik | -3.99339 | 1 | -5.3172  | 48.8988 | 1.00407   | Down |
| NR_015555    | 4933404O12Rik | -3.99311 | 1 | -5.22005 | 6.35487 | 0.144667  | Down |
| NR_038042    | 1700028116Rik | -3.99238 | 1 | -5.6321  | 10.5595 | 0.135968  | Down |
| NM_001081025 | 4932425124Rik | -3.99167 | 1 | -4.65072 | 15.0476 | 0.545248  | Down |
| NM_144537    | Cpa5          | -3.9912  | 1 | -5.53    | 7.06515 | 0.109716  | Down |
| NM_001085511 | 4932429P05Rik | -3.99086 | 1 | -5.75651 | 2.61377 | 0.0232108 | Down |
| NM_010920    | Nkx2-6        | -3.99086 | 1 | -5.75651 | 6.99341 | 0.0621029 | Down |
| NM_029048    | Spdyb         | -3.99086 | 1 | -5.75651 | 4.44441 | 0.0394673 | Down |
| NM_001163787 | Ccdc151       | -3.99071 | 1 | -5.05607 | 12.5131 | 0.326323  | Down |
| NM_028672    | Fam161a       | -3.98941 | 1 | -4.56234 | 27.5606 | 1.07483   | Down |
| NM_019536    | Dnahc10       | -3.98764 | 1 | -4.58864 | 3.48514 | 0.132965  | Down |
| NM_001145537 | 4930544D05Rik | -3.98329 | 1 | -5.36727 | 28.4962 | 0.549701  | Down |
| NM_011369    | Shcbp1        | -3.98062 | 1 | -4.6537  | 18.6654 | 0.673461  | Down |
| NM_028892    | Spag17        | -3.97816 | 1 | -4.33162 | 16.4082 | 0.767037  | Down |
| NR_003646    | 4921511C20Rik | -3.97816 | 1 | -6.74413 | 4.99047 | 0         | Down |
| NM_027035    | 1700001L19Rik | -3.9781  | 1 | -4.94504 | 15.3802 | 0.436781  | Down |
| NM_139051    | Nr5a1         | -3.97357 | 1 | -5.4284  | 5.48652 | 0.0974428 | Down |
| NM_001122635 | Cdhr4         | -3.96894 | 1 | -5.5082  | 12.0351 | 0.189756  | Down |
| NM_001195673 | Prr22         | -3.96894 | 1 | -5.5082  | 10.1184 | 0.159535  | Down |
| NM_001033365 | Gm628         | -3.96536 | 1 | -5.73164 | 3.54371 | 0.032021  | Down |
| NM_009556    | Zfp42         | -3.96536 | 1 | -6.73164 | 4.41144 | 0         | Down |
| NM_207657    | 5031410I06Rik | -3.9626  | 1 | -4.7285  | 10.8311 | 0.36541   | Down |
| NM_001085491 | 1700125D06Rik | -3.96145 | 1 | -5.50086 | 24.3551 | 0.385973  | Down |
| NM_029181    | Six1          | -3.96145 | 1 | -5.50086 | 18.2909 | 0.289869  | Down |
| NM_173771    | 4933406M09Rik | -3.96117 | 1 | -5.34558 | 10.3555 | 0.202799  | Down |
| NM_001034102 | Gm5800        | -3.95528 | 1 | -5.5958  | 12.7757 | 0.168721  | Down |
| NM_026092    | Lyzl1         | -3.95391 | 1 | -5.49348 | 15.9064 | 0.25338   | Down |
| NM_177230    | Ccdc158       | -3.94601 | 1 | -4.44298 | 18.4774 | 0.78978   | Down |
| NM_144819    | Ccdc92        | -3.94248 | 1 | -4.30858 | 52.3006 | 2.48213   | Down |
| NM_182957    | Gm17019       | -3.93922 | 1 | -4.61277 | 33.0312 | 1.22615   | Down |
| NM_001200028 | 1700027A23Rik | -3.93576 | 1 | -4.54765 | 47.8957 | 1.87738   | Down |
| NM_027754    | Rnf148        | -3.9333  | 1 | -4.6558  | 27.4956 | 0.982646  | Down |
| NM_001040611 | Peg10         | -3.93043 | 1 | -4.82233 | 4.15063 | 0.129237  | Down |
| NM_027787    | Rfx2          | -3.92974 | 1 | -4.30266 | 33.7137 | 1.60582   | Down |
| NM_007664    | Cdh2          | -3.92773 | 1 | -4.55063 | 9.4954  | 0.370853  | Down |
| NM_001100445 | Gm2030        | -3.92627 | 1 | -6.6935  | 6.85201 | 0         | Down |
| NR_033461    | Gm9999        | -3.92529 | 1 | -4.57204 | 72.6429 | 2.78554   | Down |
| NM_028655    | Sat1          | -3.92387 | 1 | -4.69028 | 12.8868 | 0.446461  | Down |
| NM_007760    | Crat          | -3.9222  | 1 | -4.13347 | 75.309  | 4.06919   | Down |
| NM_001145977 | Cadm2         | -3.92215 | 1 | -5.378   | 1.63691 | 0.0301105 | Down |
| NM_176965    | Efcab5        | -3.92095 | 1 | -4.20807 | 39.5186 | 2.02076   | Down |
| NR_028586    | Gm11978       | -3.9159  | 1 | -5.30118 | 13.6077 | 0.274851  | Down |
| NM_013751    | Hrasls        | -3.91069 | 1 | -4.65355 | 11.0457 | 0.39405   | Down |
| NM_010079    | Dsg1a         | -3.9099  | 1 | -5.13828 | 4.23582 | 0.102066  | Down |
| NM_025856    | 1700029G01Rik | -3.90646 | 1 | -4.16764 | 114.931 | 6.05193   | Down |
| NM_026580    | Otub2         | -3.90276 | 1 | -4.32623 | 31.1673 | 1.45471   | Down |
| NR_028584    | Gm11213       | -3.90237 | 1 | -5.35863 | 29.3934 | 0.548023  | Down |
| NM_013538    | Cdca3         | -3.9022  | 1 | -4.52538 | 29.1324 | 1.15792   | Down |
| NM_011866    | Pde10a        | -3.90066 | 1 | -4.79304 | 3.51309 | 0.111636  | Down |
| NM_023209    | Pbk           | -3.90031 | 1 | -4.69693 | 17.7831 | 0.610616  | Down |
| NM_021885    | Tub           | -3.90003 | 1 | -5.44073 | 2.19367 | 0.036252  | Down |
| NM_001001334 | BC061194      | -3.89683 | 1 | -4.6935  | 17.6871 | 0.608767  | Down |
| NM_181815    | 4930534B04Rik | -3.8924  | 1 | -4.20046 | 32.8675 | 1.68762   | Down |
| NM_001164201 | Lass3         | -3.88919 | 1 | -4.39235 | 19.4651 | 0.861227  | Down |
| NM_016869    | Corin         | -3.88707 | 1 | -4.95419 | 5.27391 | 0.147627  | Down |
| NM_011667    | Ube1y1        | -3.88611 | 1 | -5.65433 | 1.89069 | 0.0180334 | Down |
| NM_199471    | Prss43        | -3.88611 | 1 | -5.65433 | 3.77853 | 0.0360396 | Down |
| NM_013688    | Tcte1         | -3.8853  | 1 | -4.47753 | 15.2907 | 0.630975  | Down |
| NM_001177545 | Zfp600        | -3.88233 | 1 | -5.339   | 3.66274 | 0.0692295 | Down |
| NM_175350    | Tmem146       | -3.87522 | 1 | -5.10424 | 9.07503 | 0.223909  | Down |
| NM_008092    | Gata4         | -3.87247 | 1 | -6.64103 | 2.1978  | 0         | Down |

|              |               |          |   |          |         |           |      |
|--------------|---------------|----------|---|----------|---------|-----------|------|
| NM_198601    | Trim52        | -3.87247 | 1 | -6.64103 | 2.41879 | 0         | Down |
| NM_001034876 | Ccdc24        | -3.87162 | 1 | -4.84034 | 20.2159 | 0.617436  | Down |
| NM_027587    | Micalcl       | -3.86916 | 1 | -4.39746 | 23.8416 | 1.04826   | Down |
| NM_030187    | Ak7           | -3.85954 | 1 | -5.13407 | 6.82734 | 0.162476  | Down |
| NM_001079929 | Ccdc154       | -3.85868 | 1 | -5.62761 | 3.05645 | 0.0297025 | Down |
| NM_001195767 | Gm6772        | -3.85469 | 1 | -5.12932 | 10.799  | 0.257843  | Down |
| NM_146248    | Cchcr1        | -3.85256 | 1 | -4.35037 | 23.694  | 1.07997   | Down |
| NM_153123    | Atf7ip2       | -3.84806 | 1 | -5.49101 | 3.91079 | 0.0555658 | Down |
| NM_001033446 | Gm949         | -3.84478 | 1 | -6.61407 | 3.25668 | 0         | Down |
| NM_028737    | 4931406B18Rik | -3.84478 | 1 | -5.61407 | 1.84326 | 0.0180834 | Down |
| NM_023249    | Ypel1         | -3.84211 | 1 | -4.16719 | 51.9486 | 2.72692   | Down |
| NM_029283    | Fam183b       | -3.83951 | 1 | -4.58332 | 54.5639 | 2.04387   | Down |
| NM_001145969 | Rwdd2a        | -3.83565 | 1 | -4.80501 | 20.6287 | 0.645708  | Down |
| NM_001163359 | Figl1         | -3.83521 | 1 | -4.40971 | 16.1461 | 0.700046  | Down |
| NM_027972    | Ccdc19        | -3.83019 | 1 | -4.45418 | 22.6445 | 0.945655  | Down |
| NR_027980    | 1700001L05Rik | -3.8273  | 1 | -4.07201 | 39.0782 | 2.20049   | Down |
| NM_053264    | 4930444G20Rik | -3.82701 | 1 | -5.21407 | 9.4339  | 0.202456  | Down |
| NM_018873    | Srcin1        | -3.81944 | 1 | -4.71318 | 3.68227 | 0.123689  | Down |
| NM_028131    | Cenpn         | -3.81944 | 1 | -4.71318 | 14.5062 | 0.487269  | Down |
| NM_001048189 | Agbl4         | -3.8194  | 1 | -5.36188 | 6.61784 | 0.115543  | Down |
| NM_029594    | Ii31          | -3.81737 | 1 | -5.46105 | 12.2178 | 0.177262  | Down |
| NM_029303    | Pfn3          | -3.81655 | 1 | -5.58658 | 13.1713 | 0.131727  | Down |
| NM_023850    | Chst1         | -3.81343 | 1 | -5.27158 | 5.40497 | 0.107071  | Down |
| NM_015789    | Dkk11         | -3.81204 | 1 | -4.02418 | 338.277 | 19.7167   | Down |
| NM_001081432 | Ptprq         | -3.807   | 1 | -5.45093 | 1.39228 | 0.0203431 | Down |
| NM_001170788 | Lrrc36        | -3.80519 | 1 | -4.8738  | 10.0594 | 0.297764  | Down |
| NM_029458    | Hormad2       | -3.80224 | 1 | -6.57265 | 5.29313 | 0         | Down |
| NM_001170913 | Trim66        | -3.79883 | 1 | -4.63721 | 2.83139 | 0.100841  | Down |
| NM_175333    | Slc25a41      | -3.79655 | 1 | -5.44073 | 7.95841 | 0.117114  | Down |
| NM_010167    | Eya4          | -3.79594 | 1 | -4.5024  | 7.90613 | 0.315257  | Down |
| NM_027963    | Wdr16         | -3.79453 | 1 | -4.23323 | 34.7673 | 1.72872   | Down |
| NM_001085537 | Gm14501       | -3.7925  | 1 | -4.86134 | 44.6087 | 1.33193   | Down |
| NM_029617    | Casc5         | -3.78307 | 1 | -4.38629 | 6.51536 | 0.286064  | Down |
| NM_011020    | Hspa4l        | -3.77599 | 1 | -4.00861 | 70.261  | 4.13635   | Down |
| NM_008552    | Mas1          | -3.77486 | 1 | -5.05105 | 8.05341 | 0.203045  | Down |
| NM_025929    | 2010109I03Rik | -3.77317 | 1 | -5.54436 | 3.69332 | 0.038045  | Down |
| NM_026233    | 4933434I20Rik | -3.77317 | 1 | -5.54436 | 5.39419 | 0.0555658 | Down |
| NM_027702    | 4933421I07Rik | -3.77317 | 1 | -5.54436 | 5.07596 | 0.0522877 | Down |
| NM_027704    | Zdhhc11       | -3.77317 | 1 | -6.54436 | 5.35687 | 0         | Down |
| NM_029370    | 1700020C07Rik | -3.77047 | 1 | -5.22955 | 17.9795 | 0.366748  | Down |
| NM_001033184 | 1700057G04Rik | -3.76877 | 1 | -5.31241 | 11.3284 | 0.204727  | Down |
| NM_001038995 | Gm4787        | -3.76603 | 1 | -4.10967 | 47.4392 | 2.58862   | Down |
| NM_008868    | Pla2g2c       | -3.76589 | 1 | -4.99699 | 13.3528 | 0.354962  | Down |
| NM_029681    | Wbscr28       | -3.76318 | 1 | -5.22243 | 15.0303 | 0.308116  | Down |
| NM_019465    | Crtam         | -3.76172 | 1 | -5.09002 | 9.54749 | 0.229609  | Down |
| NM_023219    | Slc5a4b       | -3.75841 | 1 | -5.53    | 3.23621 | 0.0336731 | Down |
| NM_177705    | 4932411N23Rik | -3.75841 | 1 | -5.53    | 2.02691 | 0.0210902 | Down |
| NM_178738    | Prss35        | -3.75841 | 1 | -6.53    | 2.73468 | 0         | Down |
| NM_027598    | 4921524L21Rik | -3.75149 | 1 | -5.29554 | 7.95818 | 0.145522  | Down |
| NM_032004    | Tssk6         | -3.74432 | 1 | -4.26728 | 41.153  | 1.98196   | Down |
| NM_025619    | 1700019L03Rik | -3.74406 | 1 | -4.38067 | 22.4682 | 0.985786  | Down |
| NR_029414    | Gsdmcl-ps     | -3.74109 | 1 | -5.20084 | 7.14985 | 0.14879   | Down |
| NM_028901    | Myo18b        | -3.73506 | 1 | -4.44235 | 3.75399 | 0.156067  | Down |
| NM_001177504 | Gm6588        | -3.73287 | 1 | -5.06178 | 7.593   | 0.186228  | Down |
| NM_025744    | 4933404M02Rik | -3.73078 | 1 | -4.70206 | 13.4285 | 0.451516  | Down |
| NM_001033782 | Gm5592        | -3.72842 | 1 | -6.50086 | 2.22889 | 0         | Down |
| NM_027512    | 3830417A13Rik | -3.72842 | 1 | -6.50086 | 4.09958 | 0         | Down |
| NR_001582    | Speer5-ps1    | -3.72842 | 1 | -6.50086 | 4.72082 | 0         | Down |
| NM_010059    | Dmc1          | -3.72517 | 1 | -5.26985 | 5.27784 | 0.0982541 | Down |
| NM_175430    | Ccdc40        | -3.72365 | 1 | -4.25344 | 10.3861 | 0.504656  | Down |
| NM_028222    | Cdkn3         | -3.72262 | 1 | -4.99989 | 24.8839 | 0.650112  | Down |
| NM_027027    | Asb9          | -3.71866 | 1 | -5.17893 | 12.048  | 0.254578  | Down |
| NM_016743    | Nell2         | -3.71729 | 1 | -4.99467 | 5.69218 | 0.149254  | Down |
| NM_028483    | Cib4          | -3.71319 | 1 | -6.48606 | 8.71162 | 0         | Down |
| NM_029054    | 4930443G12Rik | -3.71319 | 1 | -5.48606 | 4.35014 | 0.0466781 | Down |
| NM_029232    | Tmco5b        | -3.71319 | 1 | -5.48606 | 5.40867 | 0.0580364 | Down |
| NM_173435    | 4930595M18Rik | -3.71319 | 1 | -6.48606 | 2.5295  | 0         | Down |
| NM_029444    | 4930447C04Rik | -3.71111 | 1 | -5.17155 | 7.07876 | 0.150348  | Down |
| NR_024208    | Sycp1-ps1     | -3.71012 | 1 | -5.35647 | 2.95518 | 0.0461233 | Down |
| NM_029335    | 1700026D08Rik | -3.70998 | 1 | -4.22693 | 41.4172 | 2.05276   | Down |
| NM_024245    | Kif23         | -3.70646 | 1 | -4.5464  | 7.18295 | 0.272491  | Down |
| NM_001033250 | Lemd1         | -3.70592 | 1 | -5.0956  | 15.6685 | 0.365163  | Down |
| NM_028735    | Ttc21a        | -3.70453 | 1 | -4.30868 | 9.63236 | 0.446333  | Down |
| NM_172476    | Tmc7          | -3.70248 | 1 | -4.06185 | 23.2517 | 1.31023   | Down |
| NM_021470    | Rnf32         | -3.70164 | 1 | -4.18494 | 54.4574 | 2.78863   | Down |
| NM_198651    | 4430402I18Rik | -3.70075 | 1 | -4.04134 | 53.6299 | 3.06913   | Down |

|                |               |          |   |          |         |           |      |
|----------------|---------------|----------|---|----------|---------|-----------|------|
| NM_183272      | Fam24a        | -3.69837 | 1 | -5.2437  | 30.6198 | 0.58052   | Down |
| NM_029067      | Spata17       | -3.69554 | 1 | -4.6675  | 21.429  | 0.738038  | Down |
| NM_001040137   | Pdzd9         | -3.69301 | 1 | -4.14446 | 51.2062 | 2.70501   | Down |
| NM_172553      | Alx1          | -3.69256 | 1 | -5.08254 | 6.12224 | 0.143985  | Down |
| NM_172916      | Hydin         | -3.68945 | 1 | -4.0956  | 5.22377 | 0.286563  | Down |
| NM_029326      | 1700018L24Rik | -3.68767 | 1 | -5.33461 | 11.6904 | 0.185267  | Down |
| NM_029562      | Cyp2d26       | -3.68767 | 1 | -5.33461 | 5.50765 | 0.0872839 | Down |
| NM_001111142   | Gm88          | -3.68224 | 1 | -5.456   | 4.73348 | 0.0518721 | Down |
| NM_028568      | Dusp21        | -3.68224 | 1 | -5.456   | 7.96007 | 0.0872308 | Down |
| NM_029947      | Prdm8         | -3.68224 | 1 | -5.456   | 2.1004  | 0.0230173 | Down |
| NR_038130      | 4930474N09Rik | -3.68224 | 1 | -5.456   | 5.57069 | 0.0610467 | Down |
| NM_029659      | Stylx1        | -3.6821  | 1 | -4.65433 | 13.753  | 0.478027  | Down |
| NM_001177579   | Gm10471       | -3.68022 | 1 | -5.226   | 3.35744 | 0.0644443 | Down |
| NM_177651      | 4933409G03Rik | -3.67907 | 1 | -5.06937 | 11.2945 | 0.268077  | Down |
| NM_011401      | Slc2a3        | -3.67485 | 1 | -3.80562 | 180.314 | 12.2583   | Down |
| NM_001204914   | Reep2         | -3.67295 | 1 | -4.74413 | 11.5429 | 0.373911  | Down |
| NM_177890      | Gm5114        | -3.67229 | 1 | -5.06273 | 4.94049 | 0.117806  | Down |
| NM_001136086   | Dpysl3        | -3.67178 | 1 | -3.9965  | 62.3938 | 3.68715   | Down |
| NM_175240      | Fam187b       | -3.67056 | 1 | -4.14918 | 40.529  | 2.12857   | Down |
| NM_030690      | Rai14         | -3.6688  | 1 | -3.88807 | 53.308  | 3.41373   | Down |
| NM_203660      | Gm5136        | -3.66653 | 1 | -5.44073 | 5.80255 | 0.0642712 | Down |
| NR_015571      | 4930471G03Rik | -3.66547 | 1 | -5.05607 | 22.3976 | 0.536554  | Down |
| NM_023047      | Dpysl5        | -3.66183 | 1 | -5.20807 | 2.20697 | 0.0428944 | Down |
| NM_026915      | Lyzl4         | -3.65733 | 1 | -4.93599 | 18.4728 | 0.504555  | Down |
| NM_022311      | Tcte2         | -3.65579 | 1 | -4.26054 | 27.6693 | 1.32569   | Down |
| NM_145688      | Ccdc46        | -3.65494 | 1 | -4.4253  | 22.2705 | 0.927552  | Down |
| NM_001033252   | Gm732         | -3.65335 | 1 | -5.30118 | 5.32872 | 0.0864431 | Down |
| NR_015547      | 1700009J07Rik | -3.65318 | 1 | -4.25796 | 42.5478 | 2.04219   | Down |
| NM_019497      | Grk4          | -3.65272 | 1 | -4.88615 | 8.30643 | 0.238508  | Down |
| NM_029974      | Dcst1         | -3.65205 | 1 | -4.30216 | 14.7706 | 0.683132  | Down |
| NM_001079931   | Gm5347        | -3.65062 | 1 | -5.4253  | 2.50068 | 0.0279996 | Down |
| NM_175008      | 4930474N05Rik | -3.65062 | 1 | -6.4253  | 7.64213 | 0         | Down |
| NM_001042421   | Kntc1         | -3.64921 | 1 | -5.11111 | 1.86222 | 0.0412533 | Down |
| NM_001037928   | Gm11992       | -3.64616 | 1 | -4.92506 | 7.60815 | 0.20939   | Down |
| NM_016777      | Nasp          | -3.64334 | 1 | -3.79911 | 161.172 | 11        | Down |
| NM_028742      | Iftd1         | -3.64272 | 1 | -4.97361 | 10.7674 | 0.280799  | Down |
| NM_026470      | Spata6        | -3.64194 | 1 | -3.90074 | 76.6679 | 4.8587    | Down |
| NM_029198      | 4930538K18Rik | -3.63909 | 1 | -4.40971 | 17.0062 | 0.716     | Down |
| NM_001101628   | Iqcf6         | -3.63455 | 1 | -6.40971 | 13.3799 | 0         | Down |
| NM_153172      | Prss45        | -3.6333  | 1 | -5.0956  | 10.4087 | 0.233088  | Down |
| NR_028391      | BB031773      | -3.62774 | 1 | -4.8216  | 5.81569 | 0.176777  | Down |
| NM_029314      | 1700013F07Rik | -3.62691 | 1 | -4.86088 | 33.1983 | 0.970148  | Down |
| NM_001033479   | Gm1527        | -3.6183  | 1 | -6.39394 | 2.95866 | 0         | Down |
| NM_001161742   | Hsd3b3        | -3.6183  | 1 | -5.39394 | 3.54571 | 0.0405828 | Down |
| NM_009440      | Tsx           | -3.6183  | 1 | -5.39394 | 7.69615 | 0.0880871 | Down |
| NM_175674      | Vmn2r7        | -3.6183  | 1 | -5.39394 | 2.52511 | 0.0289014 | Down |
| NR_003962      | Vmn2r-ps11    | -3.6183  | 1 | -6.39394 | 2.77416 | 0         | Down |
| NR_033590      | Gm8096        | -3.6183  | 1 | -5.39394 | 3.77853 | 0.0432476 | Down |
| NM_080850      | Pask          | -3.61292 | 1 | -3.93511 | 23.6485 | 1.45854   | Down |
| NM_019670      | Diap3         | -3.6122  | 1 | -4.45383 | 6.56097 | 0.265439  | Down |
| NM_023146      | Ranbp17       | -3.61041 | 1 | -3.9812  | 18.5588 | 1.10514   | Down |
| NM_001081648   | Gm15107       | -3.60912 | 1 | -5.07201 | 6.22013 | 0.1416    | Down |
| NM_007430      | Nr0b1         | -3.60186 | 1 | -5.378   | 3.45745 | 0.0400173 | Down |
| NM_025357      | Smpx          | -3.60186 | 1 | -6.378   | 6.58458 | 0         | Down |
| NM_027709      | Clec12b       | -3.60186 | 1 | -6.378   | 4.07267 | 0         | Down |
| NR_027829      | Gm10638       | -3.60012 | 1 | -4.32724 | 19.9561 | 0.896069  | Down |
| NM_001198987   | Gm15097       | -3.5956  | 1 | -5.14353 | 5.30197 | 0.107794  | Down |
| NM_001177784   | Dis3l         | -3.59538 | 1 | -3.86477 | 47.5197 | 3.08604   | Down |
| NM_001085530_2 | Gm13298       | -3.59511 | 1 | -4.09002 | 13.0442 | 0.712695  | Down |
| NM_001033438   | Gm906         | -3.58997 | 1 | -4.82474 | 6.08044 | 0.182211  | Down |
| NM_001014976   | Espl1         | -3.58877 | 1 | -4.28189 | 4.41494 | 0.205736  | Down |
| NM_029588      | 1700012L04Rik | -3.58868 | 1 | -4.78339 | 39.4263 | 1.2307    | Down |
| NM_031384      | Tex11         | -3.58589 | 1 | -5.13407 | 3.23804 | 0.0662686 | Down |
| NM_009979      | Cst9          | -3.58388 | 1 | -4.17027 | 57.2986 | 2.93024   | Down |
| NM_173384      | Sox30         | -3.58268 | 1 | -4.3844  | 7.86518 | 0.335584  | Down |
| NM_001002238   | Tdrd1         | -3.57929 | 1 | -4.02    | 13.4309 | 0.774302  | Down |
| NM_001146328   | Rbm46         | -3.57802 | 1 | -4.20519 | 19.4003 | 0.963099  | Down |
| NM_008457      | Klk1b8        | -3.57754 | 1 | -4.65072 | 24.4912 | 0.846592  | Down |
| NM_009521      | Wnt3          | -3.57623 | 1 | -5.03995 | 3.96008 | 0.0921874 | Down |
| NM_175031      | Stk36         | -3.57531 | 1 | -4.18111 | 7.04386 | 0.356623  | Down |
| NM_001039475   | Slco6b1       | -3.57255 | 1 | -4.17838 | 14.8678 | 0.754168  | Down |
| NM_015826      | Dmrt1         | -3.5684  | 1 | -6.34558 | 2.6936  | 0         | Down |
| NM_145399      | Scgn          | -3.5684  | 1 | -5.34558 | 4.29715 | 0.0508795 | Down |
| NR_037989      | LOC100504525  | -3.5684  | 1 | -5.34558 | 6.84344 | 0.0810282 | Down |
| NM_001159275   | Slc25a2       | -3.55869 | 1 | -4.75404 | 15.0673 | 0.480029  | Down |
| NM_172701      | Oscp1         | -3.55143 | 1 | -3.97799 | 31.9966 | 1.90153   | Down |



|                |               |          |   |          |          |            |      |
|----------------|---------------|----------|---|----------|----------|------------|------|
| NM_029693      | 1700123K08Rik | -3.55138 | 1 | -5.32909 | 5.72454  | 0.0685683  | Down |
| NM_153193      | Hsd3b2        | -3.55138 | 1 | -6.32909 | 3.32977  | 0          | Down |
| NM_183015      | Ccnb3         | -3.55138 | 1 | -5.32909 | 1.31612  | 0.0157644  | Down |
| NM_183109      | Tmprss12      | -3.55138 | 1 | -5.32909 | 4.44299  | 0.0532179  | Down |
| NM_027029      | Spata3        | -3.5509  | 1 | -3.97078 | 94.7563  | 5.66266    | Down |
| NM_027419      | 2810408A11Rik | -3.55033 | 1 | -3.87899 | 66.9036  | 4.28859    | Down |
| NR_027945      | 4930511M06Rik | -3.54516 | 1 | -5.196   | 9.38786  | 0.163906   | Down |
| NM_178914      | Spata7        | -3.54408 | 1 | -3.86111 | 58.9842  | 3.83074    | Down |
| NM_021317      | Dnajb7        | -3.54006 | 1 | -3.95682 | 60.1733  | 3.63192    | Down |
| NM_001177767   | Gm13138       | -3.53991 | 1 | -4.87321 | 3.85246  | 0.10774    | Down |
| NM_025778      | Bcl2l14       | -3.53904 | 1 | -3.83958 | 59.3018  | 3.91293    | Down |
| NM_001037744   | Timm8a2       | -3.53416 | 1 | -6.31241 | 6.47421  | 0          | Down |
| NM_028918      | Ttc25         | -3.53104 | 1 | -4.03792 | 17.5593  | 0.993559   | Down |
| NM_028844      | Aven          | -3.5287  | 1 | -4.07481 | 30.4876  | 1.67428    | Down |
| NM_198117      | Pcdha2        | -3.52805 | 1 | -4.72409 | 3.70292  | 0.120455   | Down |
| NM_026560      | Cdca8         | -3.52225 | 1 | -4.59664 | 12.3013  | 0.441519   | Down |
| NM_175286      | Tprn          | -3.51714 | 1 | -3.93412 | 25.018   | 1.534      | Down |
| NM_029062      | 4930521A18Rik | -3.51673 | 1 | -5.29554 | 4.04017  | 0.0495452  | Down |
| NR_027803      | D6Erd474e     | -3.51673 | 1 | -6.29554 | 2.12032  | 0          | Down |
| NR_036630      | Gm1082        | -3.51673 | 1 | -5.29554 | 2.2108   | 0.0271114  | Down |
| NM_144524      | Angel1        | -3.51546 | 1 | -3.87843 | 23.6051  | 1.51041    | Down |
| NM_027407      | Ica1l         | -3.51469 | 1 | -3.99012 | 15.0842  | 0.885094   | Down |
| NM_013783      | Mmel1         | -3.51103 | 1 | -4.79304 | 5.6713   | 0.171105   | Down |
| NM_029368      | 1700029F09Rik | -3.50895 | 1 | -3.94298 | 51.2918  | 3.12135    | Down |
| NM_001103158   | Gm13242       | -3.50621 | 1 | -4.84034 | 3.77285  | 0.107956   | Down |
| NM_007789      | Ncan          | -3.50571 | 1 | -5.05607 | 1.39075  | 0.0300548  | Down |
| NM_001007463   | Spag8         | -3.50558 | 1 | -4.27846 | 18.7226  | 0.863564   | Down |
| NM_172850      | Ankmy1        | -3.50481 | 1 | -4.157   | 9.52019  | 0.487019   | Down |
| NM_198660      | E230008N13Rik | -3.50008 | 1 | -4.47611 | 3.95032  | 0.155422   | Down |
| NM_001177365   | Gm9112        | -3.49908 | 1 | -6.27846 | 12.6576  | 0          | Down |
| NM_172420      | Ppp1r1c       | -3.49908 | 0 | -6.27846 | 2.18779  | 0          | Down |
| NM_028169      | Fam71e1       | -3.4948  | 1 | -3.96118 | 66.3273  | 3.97429    | Down |
| NM_027585      | 4921517L17Rik | -3.49461 | 1 | -3.9962  | 23.3964  | 1.36355    | Down |
| NM_001007569   | Pnmal1        | -3.49436 | 1 | -5.14667 | 4.70954  | 0.0851108  | Down |
| NM_177005      | Glt1d1        | -3.49057 | 1 | -4.95653 | 7.4655   | 0.184197   | Down |
| NM_133348      | Acot7         | -3.4882  | 1 | -3.86463 | 55.8383  | 3.60396    | Down |
| NM_177384      | Ttc16         | -3.4875  | 1 | -3.93301 | 22.8053  | 1.39608    | Down |
| NM_001166384_2 | Rbmy1a1       | -3.48122 | 1 | -6.26118 | 3.61698  | 0          | Down |
| NM_172878      | Ttc34         | -3.47868 | 1 | -4.8135  | 4.61716  | 0.134608   | Down |
| NM_145825      | Cetn4         | -3.47665 | 1 | -3.94323 | 52.5165  | 3.18619    | Down |
| NM_001033460   | Ccdc164       | -3.4755  | 1 | -4.67274 | 7.7094   | 0.259903   | Down |
| NR_038035      | 4930444F02Rik | -3.47515 | 1 | -4.37553 | 23.473   | 0.997097   | Down |
| NR_033197      | 4933427E11Rik | -3.47172 | 1 | -4.80671 | 12.113   | 0.354815   | Down |
| NM_001013575   | Olfrr112      | -3.46827 | 1 | -5.12136 | 2.45846  | 0.0452227  | Down |
| NM_001122734   | Gm15085       | -3.46795 | 1 | -4.86343 | 6.46069  | 0.176999   | Down |
| NM_011022      | Ott           | -3.46795 | 1 | -4.86343 | 6.46069  | 0.176999   | Down |
| NM_170599      | Igsf11        | -3.46569 | 1 | -4.23929 | 6.65882  | 0.315611   | Down |
| NM_001080966   | Aurkc         | -3.46312 | 1 | -5.2437  | 3.92568  | 0.0499242  | Down |
| NM_001081391   | Csmcd3        | -3.46312 | 1 | -5.2437  | 0.433507 | 0.00551305 | Down |
| NM_001100444   | Gm5934        | -3.46312 | 1 | -5.2437  | 2.18127  | 0.0277399  | Down |
| NM_028602      | Tex19.1       | -3.46312 | 1 | -5.2437  | 3.24619  | 0.0412829  | Down |
| NM_028968      | Ifitm7        | -3.46312 | 1 | -5.2437  | 3.09661  | 0.0393807  | Down |
| NM_001012273   | Birc5         | -3.45992 | 1 | -4.36063 | 5.87575  | 0.252193   | Down |
| NM_025499      | Eid3          | -3.45577 | 1 | -3.70003 | 142.005  | 10.3502    | Down |
| NM_028561      | Speer4b       | -3.45505 | 1 | -5.10854 | 3.91296  | 0.0726262  | Down |
| NM_001077684   | 4930578N16Rik | -3.4547  | 1 | -3.91709 | 32.2093  | 1.99074    | Down |
| NM_008432      | Kcnu1         | -3.4481  | 1 | -4.4253  | 5.48701  | 0.223648   | Down |
| NM_029285      | 1700001C02Rik | -3.44809 | 1 | -4.73164 | 22.4153  | 0.70581    | Down |
| NM_001033765   | 1700071K01Rik | -3.44481 | 1 | -5.226   | 5.37132  | 0.0691628  | Down |
| NM_177735      | Tmem130       | -3.44481 | 1 | -6.226   | 2.0393   | 0          | Down |
| NM_080637      | Nme5          | -3.4399  | 1 | -4.00249 | 46.5741  | 2.68458    | Down |
| NM_027717      | Dydc2         | -3.4379  | 1 | -4.67622 | 29.1957  | 0.970148   | Down |
| NM_028829      | Paqr8         | -3.42689 | 1 | -4.08026 | 6.62241  | 0.357331   | Down |
| NM_016902      | Nphp1         | -3.42618 | 1 | -3.58443 | 185.704  | 14.7076    | Down |
| NM_175217      | Mmd2          | -3.42347 | 1 | -4.05286 | 14.5491  | 0.802881   | Down |
| NM_001163028   | Bcmo1         | -3.42082 | 1 | -4.97361 | 3.71586  | 0.0850604  | Down |
| NM_001042715   | Ccdc135       | -3.41997 | 1 | -4.65873 | 6.02923  | 0.202799   | Down |
| NM_177034      | Apba1         | -3.41887 | 1 | -3.98994 | 5.59057  | 0.324748   | Down |
| NM_177589      | Ulk4          | -3.41765 | 1 | -3.6591  | 45.3055  | 3.39766    | Down |
| NM_025492      | 1700020L24Rik | -3.41761 | 1 | -4.22243 | 22.6072  | 1.07956    | Down |
| NM_029245      | Ankrd53       | -3.41325 | 1 | -4.31499 | 11.1942  | 0.495965   | Down |
| NM_010438      | Hk1           | -3.41285 | 1 | -3.54573 | 142.616  | 11.6091    | Down |
| NM_001037927   | Wdr93         | -3.41042 | 1 | -4.48741 | 8.11305  | 0.314184   | Down |
| NM_009326      | Tcea2         | -3.40844 | 1 | -3.88038 | 44.824   | 2.83954    | Down |
| NM_009570      | Zfy1          | -3.40746 | 1 | -6.18993 | 1.9519   | 0          | Down |
| NM_027609      | Speer4f       | -3.40746 | 1 | -5.18993 | 4.41238  | 0.0582719  | Down |

|              |               |          |   |          |          |            |      |
|--------------|---------------|----------|---|----------|----------|------------|------|
| NR_015603    | 4930483J18Rik | -3.40746 | 1 | -5.18993 | 4.96897  | 0.0656225  | Down |
| NM_010174    | Fabp3         | -3.40733 | 1 | -4.07417 | 43.5581  | 2.35564    | Down |
| NM_022983    | Lpar3         | -3.4009  | 1 | -5.05607 | 2.99003  | 0.0575709  | Down |
| NM_008043    | Frat1         | -3.39778 | 1 | -3.90629 | 17.2766  | 1.0711     | Down |
| NM_029766    | Dtl           | -3.39614 | 1 | -3.93677 | 9.6031   | 0.580888   | Down |
| NM_009051    | Rex2          | -3.389   | 1 | -4.67405 | 3.81214  | 0.129497   | Down |
| NM_001193266 | Mdga2         | -3.38841 | 1 | -5.17155 | 0.545694 | 0.00730028 | Down |
| NM_009375    | Tg            | -3.38841 | 1 | -5.17155 | 0.636126 | 0.00851007 | Down |
| NM_029598    | 1700019B03Rik | -3.38765 | 1 | -4.94143 | 5.70333  | 0.133523   | Down |
| NR_033641    | 4933436C20Rik | -3.38703 | 1 | -5.04265 | 5.94324  | 0.115512   | Down |
| NM_020330    | Adam21        | -3.38245 | 1 | -4.15761 | 7.3739   | 0.369929   | Down |
| NM_032610    | Spnb4         | -3.38228 | 1 | -4.6675  | 1.74691  | 0.0575182  | Down |
| NM_008301    | Hspa2         | -3.37921 | 1 | -3.5224  | 192.735  | 15.9411    | Down |
| NR_001585    | Speer7-ps1    | -3.37642 | 1 | -4.93054 | 8.43008  | 0.198867   | Down |
| NM_173762    | Cenpe         | -3.37351 | 1 | -3.87104 | 5.92296  | 0.376735   | Down |
| NM_001033799 | 4930428D18Rik | -3.36912 | 1 | -5.15293 | 4.80205  | 0.065087   | Down |
| NM_007866    | Dll3          | -3.36912 | 1 | -5.15293 | 2.44876  | 0.0331905  | Down |
| NM_028938    | Lrriq3        | -3.36837 | 1 | -3.83177 | 19.8296  | 1.30036    | Down |
| NM_175366    | Mex3b         | -3.36664 | 1 | -4.21322 | 5.71254  | 0.273209   | Down |
| NM_144783    | Wt1           | -3.36142 | 1 | -4.831   | 3.44858  | 0.0928732  | Down |
| NM_139117    | Csda          | -3.35936 | 1 | -3.51149 | 233.221  | 19.4321    | Down |
| NM_175138    | Dnaic1        | -3.35268 | 1 | -4.5529  | 7.07841  | 0.259381   | Down |
| NM_001081228 | Ttc30a2       | -3.35227 | 1 | -3.63603 | 64.8686  | 4.93384    | Down |
| NM_001177534 | LOC100271928  | -3.34955 | 1 | -5.13407 | 5.49629  | 0.07549    | Down |
| NM_181857    | Poln          | -3.34387 | 1 | -4.32355 | 6.23075  | 0.272593   | Down |
| NM_029045    | 4930432K21Rik | -3.34379 | 1 | -4.01168 | 10.7026  | 0.604495   | Down |
| NM_001198933 | Me1           | -3.34322 | 1 | -3.69584 | 25.7665  | 1.87281    | Down |
| NM_001164355 | Ska1          | -3.34221 | 1 | -4.89737 | 3.42445  | 0.0826767  | Down |
| NM_029336    | 1700022P22Rik | -3.34098 | 1 | -4.5415  | 40.8713  | 1.50962    | Down |
| NM_012025    | Racgap1       | -3.33228 | 1 | -4.00036 | 8.74037  | 0.497561   | Down |
| NM_001034864 | Gm4907        | -3.33218 | 1 | -4.80262 | 7.98011  | 0.219209   | Down |
| NM_015785    | Zbbp          | -3.33216 | 1 | -3.63789 | 29.0372  | 2.20321    | Down |
| NM_028491    | 1700040L02Rik | -3.33118 | 1 | -3.77844 | 44.2477  | 3.01545    | Down |
| NM_029152    | Efcab10       | -3.33023 | 1 | -4.98768 | 10.5314  | 0.212714   | Down |
| NR_004441    | Gprc2a-rs5    | -3.32973 | 1 | -5.11496 | 1.74705  | 0.0243194  | Down |
| NM_001168506 | Zfp574        | -3.32661 | 1 | -3.67206 | 21.3456  | 1.57801    | Down |
| NR_033553    | 1700048O20Rik | -3.32229 | 1 | -4.79304 | 5.61918  | 0.155392   | Down |
| NM_153075    | Catsper2      | -3.32035 | 1 | -3.61685 | 52.2619  | 4.02566    | Down |
| NM_027077    | 1700016C15Rik | -3.31235 | 1 | -4.78339 | 13.7711  | 0.383396   | Down |
| NM_001039392 | Tmsb10        | -3.31087 | 1 | -3.62439 | 167.775  | 12.8444    | Down |
| NM_001142952 | Fam46c        | -3.30739 | 1 | -3.51426 | 114.208  | 9.48249    | Down |
| NM_016706    | Coil          | -3.30558 | 1 | -3.64268 | 35.0202  | 2.64363    | Down |
| NM_029801    | 1700021C14Rik | -3.30545 | 1 | -3.66626 | 167.06   | 12.388     | Down |
| NM_027749    | Cpvl          | -3.30097 | 1 | -4.95939 | 4.36946  | 0.09002    | Down |
| NM_029464    | 4930588N13Rik | -3.30097 | 1 | -4.95939 | 6.37047  | 0.131245   | Down |
| NM_001163433 | Samd4         | -3.29702 | 1 | -3.61333 | 15.512   | 1.19652    | Down |
| NM_028665    | Ankrd42       | -3.29672 | 1 | -3.53487 | 63.1295  | 5.16111    | Down |
| NM_153457    | Rtn1          | -3.29439 | 1 | -4.5364  | 4.46241  | 0.16344    | Down |
| NM_027037    | 1700007K09Rik | -3.29411 | 1 | -4.07102 | 29.8979  | 1.59299    | Down |
| NM_145987    | Tmem82        | -3.29319 | 1 | -4.49495 | 8.19718  | 0.312739   | Down |
| NR_027915    | 1700120K04Rik | -3.29224 | 1 | -4.76389 | 18.7388  | 0.528847   | Down |
| NM_026273    | 4930453N24Rik | -3.28383 | 1 | -3.45277 | 253.691  | 22.0065    | Down |
| NM_011571    | Tesk1         | -3.28328 | 1 | -3.48702 | 64.9184  | 5.4934     | Down |
| NM_001033548 | 6030429G01Rik | -3.27934 | 1 | -3.89995 | 13.34    | 0.819906   | Down |
| NM_027581    | Lrrc63        | -3.27242 | 1 | -3.737   | 19.5328  | 1.36799    | Down |
| NM_008171    | Grin2b        | -3.27125 | 1 | -4.82866 | 1.13292  | 0.0286973  | Down |
| NM_011465    | Spna1         | -3.27125 | 1 | -4.82866 | 1.0116   | 0.0256244  | Down |
| NM_025853    | Dsn1          | -3.27099 | 1 | -3.96936 | 10.3181  | 0.597472   | Down |
| NM_001102677 | Gm1993        | -3.26857 | 1 | -6.05607 | 4.37507  | 0          | Down |
| NM_001167581 | Gsdmcl1       | -3.26857 | 1 | -5.05607 | 4.36734  | 0.0633636  | Down |
| NM_178734    | Zfp473        | -3.26857 | 1 | -6.05607 | 1.30045  | 0          | Down |
| NM_153122    | Oplah         | -3.26724 | 1 | -3.66074 | 16.8     | 1.24775    | Down |
| NM_001134299 | Gm10220       | -3.26165 | 1 | -4.60235 | 4.27406  | 0.144352   | Down |
| NM_001039507 | Lipe          | -3.26085 | 1 | -3.58449 | 34.4828  | 2.71251    | Down |
| NM_183111    | Rfpl3s        | -3.25756 | 1 | -4.16299 | 22.087   | 1.08774    | Down |
| NM_023670    | Igf2bp3       | -3.25703 | 1 | -3.64548 | 15.6156  | 1.17257    | Down |
| NM_029463    | 4930568D16Rik | -3.24758 | 1 | -6.03589 | 3.97596  | 0          | Down |
| NM_172967    | 4930503L19Rik | -3.24754 | 1 | -3.67742 | 24.3971  | 1.78616    | Down |
| NM_029297    | Dynlrb2       | -3.24641 | 1 | -4.32758 | 32.2076  | 1.394      | Down |
| NM_172301    | Ccnb1         | -3.24495 | 1 | -3.91455 | 10.7729  | 0.650954   | Down |
| NR_033506    | Gm3893        | -3.24049 | 1 | -3.55075 | 28.8263  | 2.32301    | Down |
| NM_029249    | 4930547N16Rik | -3.23984 | 1 | -4.14571 | 4.76402  | 0.237456   | Down |
| NM_011121    | Plk1          | -3.23721 | 1 | -4.57864 | 5.69438  | 0.195527   | Down |
| NM_001033170 | Fam83e        | -3.23623 | 1 | -3.92009 | 8.24299  | 0.49511    | Down |
| NM_001134741 | Tdrd5         | -3.23582 | 1 | -3.65585 | 16.8162  | 1.25071    | Down |
| NM_001142953 | LOC100233207  | -3.23441 | 1 | -4.79304 | 10.6737  | 0.277185   | Down |

|                |               |          |   |          |          |           |      |
|----------------|---------------|----------|---|----------|----------|-----------|------|
| NM_028913      | Zfp819        | -3.23441 | 1 | -4.79304 | 3.43842  | 0.0892923 | Down |
| NM_007487      | Arl4a         | -3.23159 | 1 | -3.43218 | 64.0901  | 5.63413   | Down |
| NM_007699      | Chrm4         | -3.22629 | 1 | -5.01543 | 1.73729  | 0.025936  | Down |
| NM_008821      | Pet2          | -3.22629 | 1 | -6.01543 | 1.14988  | 0         | Down |
| NM_009605      | Adipoq        | -3.22629 | 1 | -6.01543 | 3.90326  | 0         | Down |
| NM_178280      | Sall3         | -3.22629 | 1 | -5.01543 | 0.698144 | 0.0104226 | Down |
| NR_033783      | 4933429O19Rik | -3.22629 | 1 | -6.01543 | 2.952    | 0         | Down |
| NM_153782      | Fam20a        | -3.22566 | 1 | -4.03454 | 7.26825  | 0.395543  | Down |
| NM_026222      | Ccdc39        | -3.21072 | 1 | -3.42201 | 57.8783  | 5.12225   | Down |
| NM_011356      | Frzb          | -3.20469 | 1 | -5.99467 | 1.62299  | 0         | Down |
| NM_001082966   | Gm15114       | -3.20398 | 1 | -4.5464  | 6.21376  | 0.21821   | Down |
| NM_027187      | Rnaseh2a      | -3.20351 | 1 | -3.41328 | 103.346  | 9.20217   | Down |
| NM_001114383   | Luzp4         | -3.20186 | 1 | -4.60496 | 5.40335  | 0.177262  | Down |
| NM_001164362   | Cep55         | -3.19911 | 1 | -4.40342 | 5.75516  | 0.234016  | Down |
| NM_029219      | Rnf19b        | -3.19797 | 1 | -3.49222 | 43.5443  | 3.6576    | Down |
| NM_054053      | Gpr98         | -3.19354 | 1 | -3.768   | 1.64425  | 0.111431  | Down |
| NM_027024      | Cst13         | -3.1909  | 1 | -3.78305 | 39.2649  | 2.62764   | Down |
| NM_008859      | Prkcq         | -3.18866 | 1 | -3.905   | 6.45811  | 0.390051  | Down |
| NR_028121      | 4930583H14Rik | -3.18728 | 1 | -4.66225 | 6.63278  | 0.200954  | Down |
| NM_008949      | Psmc3ip       | -3.18517 | 1 | -3.67464 | 45.8824  | 3.34817   | Down |
| NM_001037716   | Gm10439       | -3.1838  | 1 | -4.74413 | 4.4452   | 0.119453  | Down |
| NM_001081219   | Myo1a         | -3.18275 | 1 | -5.97361 | 1.39261  | 0         | Down |
| NM_001201395   | 4930468A15Rik | -3.18275 | 1 | -4.97361 | 4.65546  | 0.0715762 | Down |
| NM_013741      | Smok2a        | -3.18275 | 1 | -4.97361 | 2.613    | 0.040174  | Down |
| NM_007530      | Bcap29        | -3.18215 | 1 | -3.44716 | 68.1593  | 5.91522   | Down |
| NM_029428      | Adad2         | -3.17759 | 1 | -4.84034 | 3.3256   | 0.074472  | Down |
| NM_027404      | Bag5          | -3.17242 | 1 | -3.33601 | 157.062  | 14.7755   | Down |
| NM_011973      | Stk30         | -3.17097 | 1 | -3.61258 | 29.9272  | 2.28985   | Down |
| NM_028669      | 4930415F15Rik | -3.17086 | 1 | -4.73164 | 10.5511  | 0.28602   | Down |
| NM_001111141   | Gm505         | -3.167   | 1 | -3.49008 | 42.817   | 3.59633   | Down |
| NM_028536      | 1700054N08Rik | -3.16674 | 1 | -3.76879 | 10.742   | 0.725161  | Down |
| NM_026412      | D2Erd750e     | -3.16596 | 1 | -3.69628 | 11.5782  | 0.828889  | Down |
| NM_001081294   | Prr19         | -3.16533 | 1 | -4.64103 | 7.22262  | 0.222091  | Down |
| NM_028434      | 2900092C05Rik | -3.16533 | 1 | -4.64103 | 10.974   | 0.337443  | Down |
| NM_023729      | Asz1          | -3.16404 | 1 | -4.40971 | 8.251    | 0.330073  | Down |
| NM_001110853   | Crem          | -3.16287 | 1 | -3.4701  | 45.6929  | 3.89487   | Down |
| NM_009445      | Ttk           | -3.16133 | 1 | -4.50506 | 4.10382  | 0.148328  | Down |
| NM_001034856   | 4930430D24Rik | -3.16048 | 1 | -4.95223 | 3.85237  | 0.0601264 | Down |
| NM_013475      | Apoh          | -3.16048 | 1 | -4.95223 | 3.87836  | 0.060532  | Down |
| NM_028910      | Olfrc701      | -3.16048 | 1 | -5.95223 | 1.50171  | 0         | Down |
| NR_038077      | 1700001G11Rik | -3.1597  | 1 | -4.36512 | 20.1194  | 0.840206  | Down |
| NM_172770      | Ttc12         | -3.1585  | 1 | -3.62458 | 12.537   | 0.949302  | Down |
| NM_001101484   | Gm4984        | -3.15302 | 1 | -4.35863 | 16.4202  | 0.688826  | Down |
| NM_027891      | Lrwd1         | -3.15093 | 1 | -3.41388 | 60.8334  | 5.40327   | Down |
| NM_021491      | Smpd3         | -3.14581 | 1 | -3.95653 | 3.398    | 0.195236  | Down |
| NM_027438      | Pnma1         | -3.14496 | 1 | -3.92506 | 7.74038  | 0.456492  | Down |
| NM_130891      | Grip1         | -3.14256 | 1 | -3.73552 | 8.95316  | 0.619269  | Down |
| NM_172875      | Adc           | -3.14225 | 1 | -3.4437  | 53.0423  | 4.60631   | Down |
| NM_001025240   | Gm5346        | -3.13785 | 1 | -5.93054 | 2.04887  | 0         | Down |
| NM_001039558   | C030030A07Rik | -3.13785 | 1 | -4.93054 | 2.20762  | 0.0349859 | Down |
| NM_001114333   | Gm1           | -3.13785 | 1 | -4.93054 | 0.648075 | 0.0102705 | Down |
| NM_001199301   | Cacng5        | -3.13785 | 1 | -5.93054 | 1.20128  | 0         | Down |
| NR_003107      | Gm9731        | -3.13785 | 1 | -5.93054 | 3.91872  | 0         | Down |
| NR_036629      | Efcab8        | -3.13785 | 1 | -5.93054 | 3.09641  | 0         | Down |
| NM_026668      | Lrriq4        | -3.13558 | 1 | -3.76977 | 10.7444  | 0.72182   | Down |
| NM_026209      | 1810063B07Rik | -3.13438 | 1 | -3.48723 | 32.6383  | 2.74202   | Down |
| NM_175105      | Aqp11         | -3.13356 | 1 | -3.42111 | 83.6632  | 7.38546   | Down |
| NM_001033260   | Stox1         | -3.13148 | 1 | -3.6437  | 12.1322  | 0.902594  | Down |
| NM_001101510   | Susd5         | -3.12847 | 1 | -4.79304 | 1.6011   | 0.037063  | Down |
| NM_025687      | Tex12         | -3.12847 | 1 | -4.79304 | 10.053   | 0.23271   | Down |
| NM_138662      | Pcdha3        | -3.12769 | 1 | -4.37443 | 2.67845  | 0.109814  | Down |
| NM_023597      | Wdr31         | -3.12587 | 1 | -3.5133  | 47.3912  | 3.90109   | Down |
| NM_021397      | Zbtb32        | -3.11978 | 1 | -3.72265 | 15.6662  | 1.09203   | Down |
| NM_001198988   | Gm15080       | -3.1174  | 1 | -4.46249 | 5.70184  | 0.212295  | Down |
| NM_001081668   | Nup62cl       | -3.11488 | 1 | -4.90851 | 3.95421  | 0.0636445 | Down |
| NM_022987      | Zic5          | -3.11488 | 1 | -4.90851 | 1.87174  | 0.0301263 | Down |
| NM_172583      | Tmem63c       | -3.11488 | 1 | -5.90851 | 1.33824  | 0         | Down |
| NM_001099920_4 | Gm15093       | -3.11289 | 1 | -4.36008 | 6.859    | 0.284039  | Down |
| NM_001039095   | Glt6d1        | -3.1123  | 1 | -4.3191  | 13.7342  | 0.592226  | Down |
| NM_001190403   | Amy2b         | -3.11171 | 1 | -4.77692 | 4.3404   | 0.101615  | Down |
| NM_027741      | Mro           | -3.11171 | 1 | -4.77692 | 2.79917  | 0.0655326 | Down |
| NM_010343      | Gpx5          | -3.11116 | 1 | -3.13553 | 8474.13  | 917.902   | Down |
| NM_008172      | Grin2d        | -3.10844 | 1 | -4.45383 | 2.62362  | 0.0982765 | Down |
| NM_001033550   | Lrrc8b        | -3.10643 | 1 | -3.30482 | 77.8863  | 7.47981   | Down |
| NR_033616      | Pldi          | -3.10438 | 1 | -4.6675  | 8.90566  | 0.252489  | Down |
| NR_028107      | 1700058G18Rik | -3.10388 | 1 | -3.61074 | 50.0716  | 3.8136    | Down |

|              |               |          |   |          |          |            |      |
|--------------|---------------|----------|---|----------|----------|------------|------|
| NM_001146342 | Rnls          | -3.09979 | 1 | -3.53505 | 36.0585  | 2.91326    | Down |
| NM_029343    | Spata9        | -3.09886 | 1 | -3.83516 | 18.3333  | 1.15902    | Down |
| NM_138593    | Larp7         | -3.09753 | 1 | -3.31321 | 88.3237  | 8.42808    | Down |
| NM_020049    | Slc6a14       | -3.09152 | 1 | -5.88615 | 1.27933  | 0          | Down |
| NM_198415    | Ckmt2         | -3.08408 | 1 | -4.49101 | 6.80045  | 0.241558   | Down |
| NM_173012    | Letm2         | -3.08213 | 1 | -3.43555 | 34.5478  | 3.00838    | Down |
| NM_133817    | Zfp451        | -3.0813  | 1 | -3.2825  | 58.0838  | 5.6646     | Down |
| NM_029774    | Ttll11        | -3.08126 | 1 | -3.70534 | 8.02884  | 0.564927   | Down |
| NM_172715    | Agpat9        | -3.08125 | 1 | -4.42752 | 3.92432  | 0.14972    | Down |
| NM_001093775 | Myt11         | -3.07761 | 1 | -4.74413 | 0.832675 | 0.0199475  | Down |
| NM_001128634 | Tppp2         | -3.0774  | 1 | -3.54911 | 67.3624  | 5.37289    | Down |
| NM_001135198 | Ccdc36        | -3.07521 | 1 | -4.32355 | 4.71753  | 0.200394   | Down |
| NM_145150    | Prc1          | -3.06953 | 1 | -3.48845 | 17.4059  | 1.45442    | Down |
| NR_033657    | Miat          | -3.06778 | 1 | -4.86343 | 0.493261 | 0.00819532 | Down |
| NM_028980    | Ppp4r4        | -3.06642 | 1 | -3.76879 | 5.56332  | 0.370358   | Down |
| NM_020252    | Nrxn1         | -3.06297 | 1 | -4.62761 | 0.817196 | 0.0238244  | Down |
| NM_028971    | 4933430H15Rik | -3.06148 | 1 | -3.37092 | 23.0679  | 2.1062     | Down |
| NM_027094    | Dydc1         | -3.06026 | 1 | -4.72745 | 5.95367  | 0.144303   | Down |
| NM_025495    | Cenpp         | -3.05773 | 1 | -3.81549 | 17.0596  | 1.08981    | Down |
| NM_027733    | Spata24       | -3.05552 | 1 | -3.28179 | 234.404  | 22.8518    | Down |
| NM_177293    | Mtap7d3       | -3.05307 | 1 | -4.46105 | 3.54075  | 0.128427   | Down |
| NM_001199270 | Aldoat1       | -3.04526 | 1 | -3.3991  | 34.4729  | 3.07876    | Down |
| NM_001177626 | Ect2          | -3.04448 | 1 | -3.63919 | 6.75453  | 0.49954    | Down |
| NM_029376    | Speer4a       | -3.04418 | 1 | -4.39167 | 7.32634  | 0.286591   | Down |
| NM_001111119 | Ccnb1ip1      | -3.04366 | 1 | -4.84034 | 2.81914  | 0.0476067  | Down |
| NR_038029    | 1700061117Rik | -3.04366 | 1 | -4.84034 | 2.1668   | 0.0365907  | Down |
| NM_001034858 | Armc2         | -3.04309 | 1 | -3.59634 | 6.36177  | 0.487069   | Down |
| NM_001101644 | Gm4535        | -3.03565 | 1 | -3.4754  | 59.2214  | 4.98548    | Down |
| NM_010615    | Kif11         | -3.03483 | 1 | -3.72265 | 4.32417  | 0.29795    | Down |
| NM_009185    | Stil          | -3.03383 | 1 | -3.70748 | 4.05496  | 0.28296    | Down |
| NM_201353    | Slc6a7        | -3.01912 | 1 | -4.81688 | 1.25085  | 0.021475   | Down |
| NM_198615    | Mex3d         | -3.01766 | 1 | -3.43111 | 15.9579  | 1.38822    | Down |
| NM_025943    | Dzip1         | -3.01582 | 1 | -3.25379 | 32.9313  | 3.27197    | Down |
| NM_019741    | Slc2a5        | -3.01522 | 1 | -3.27484 | 40.294   | 3.94201    | Down |
| NM_172461    | Nek11         | -3.01521 | 1 | -3.92717 | 5.65508  | 0.328187   | Down |
| NM_028376    | Pfn4          | -3.00892 | 1 | -3.51728 | 27.0554  | 2.1988     | Down |
| NM_001204904 | 4930558K02Rik | -3.0069  | 1 | -4.67622 | 5.83145  | 0.146512   | Down |
| NM_026024    | Ube2t         | -3.00613 | 1 | -4.35491 | 9.94691  | 0.399208   | Down |
| NM_009251    | Serpina3g     | -3.00357 | 1 | -3.78701 | 8.27691  | 0.537358   | Down |
| NM_026888    | Phkg2         | -3.00169 | 1 | -3.21976 | 106.254  | 10.8172    | Down |
| NM_058212    | Dpf3          | -3.00126 | 1 | -3.91363 | 11.3291  | 0.663707   | Down |
| NM_001018013 | Izumo1        | -2.99847 | 1 | -3.98768 | 9.56936  | 0.528935   | Down |
| NM_010620    | Kif15         | -2.99544 | 1 | -3.66989 | 4.36394  | 0.312588   | Down |
| NM_026961    | 2200002J24Rik | -2.99414 | 1 | -4.79304 | 6.74079  | 0.11769    | Down |
| NM_175393    | 4930555G01Rik | -2.99121 | 1 | -4.55857 | 3.40871  | 0.104297   | Down |
| NM_001141977 | Tpx2          | -2.98869 | 1 | -3.72745 | 4.10334  | 0.279598   | Down |
| NM_028664    | Ankrd45       | -2.9852  | 1 | -3.59054 | 6.81392  | 0.520644   | Down |
| NM_027721    | Katnal2       | -2.98163 | 1 | -3.55148 | 16.8713  | 1.33026    | Down |
| NM_025415    | Cks2          | -2.9789  | 1 | -3.68316 | 27.8169  | 1.96546    | Down |
| NM_027040    | 1700007K13Rik | -2.97692 | 1 | -4.32672 | 13.0891  | 0.535754   | Down |
| NM_001034037 | 1700024G13Rik | -2.97667 | 1 | -4.45903 | 20.6627  | 0.721517   | Down |
| NM_172397    | Limd2         | -2.97373 | 1 | -3.17204 | 69.1023  | 7.27644    | Down |
| NM_001081333 | Plekhg4       | -2.97257 | 1 | -3.6935  | 4.43212  | 0.310112   | Down |
| NM_007766    | Pcdha4        | -2.97236 | 1 | -4.26985 | 2.17381  | 0.0944263  | Down |
| NM_001081317 | Anubl1        | -2.97125 | 1 | -3.30383 | 29.9391  | 2.86031    | Down |
| NM_001128625 | Gm364         | -2.96874 | 1 | -4.76879 | 1.87486  | 0.0332982  | Down |
| NM_146082    | BC027072      | -2.96874 | 1 | -4.76879 | 0.807469 | 0.014341   | Down |
| NM_026805    | Svop          | -2.96415 | 1 | -4.21607 | 3.93745  | 0.180266   | Down |
| NM_001001738 | Itprp         | -2.96244 | 1 | -3.48339 | 8.71624  | 0.724391   | Down |
| NR_033445    | 4931428L18Rik | -2.96147 | 1 | -4.53    | 6.30677  | 0.196867   | Down |
| NM_027617    | Spata1        | -2.96135 | 1 | -3.21788 | 64.2845  | 6.54345    | Down |
| NM_029247    | 4930550C14Rik | -2.96002 | 1 | -4.17155 | 10.93    | 0.522327   | Down |
| NM_177716    | Al836003      | -2.96002 | 1 | -4.17155 | 5.80525  | 0.277423   | Down |
| NM_153104    | Phospho1      | -2.95921 | 1 | -3.64865 | 10.3627  | 0.751738   | Down |
| NM_007809    | Cyp17a1       | -2.95757 | 1 | -3.20807 | 69.9958  | 7.1752     | Down |
| NR_038015    | LOC100502820  | -2.95584 | 1 | -4.36727 | 14.0869  | 0.545524   | Down |
| NM_026739    | 9530077C05Rik | -2.95539 | 1 | -3.41584 | 18.9984  | 1.66414    | Down |
| NM_031186    | Ndst3         | -2.95126 | 1 | -4.43458 | 1.5145   | 0.0537962  | Down |
| NM_177841    | 4932418E24Rik | -2.94667 | 1 | -3.32672 | 18.4918  | 1.73375    | Down |
| NM_001166655 | Cdkl3         | -2.94632 | 1 | -3.30323 | 34.5156  | 3.29421    | Down |
| NM_133194    | Scml2         | -2.94462 | 1 | -4.35647 | 1.89797  | 0.0740571  | Down |
| NM_001168403 | Ankrd55       | -2.94288 | 1 | -5.74413 | 1.37599  | 0          | Down |
| NM_011367    | Shbg          | -2.94288 | 1 | -5.74413 | 2.82338  | 0          | Down |
| NM_027650    | Speer3        | -2.94288 | 1 | -4.74413 | 3.33543  | 0.0602779  | Down |
| NM_029317    | Izumo2        | -2.94288 | 1 | -4.74413 | 6.21674  | 0.112349   | Down |
| NM_153544    | BC030867      | -2.94288 | 1 | -4.74413 | 1.56213  | 0.0282308  | Down |

|              |               |          |   |          |          |            |      |
|--------------|---------------|----------|---|----------|----------|------------|------|
| NM_025660    | Ribc1         | -2.94017 | 1 | -3.5464  | 16.3357  | 1.28709    | Down |
| NM_027697    | 4933413G19Rik | -2.93255 | 1 | -4.60496 | 4.97807  | 0.131485   | Down |
| NM_028500    | Calr3         | -2.93144 | 1 | -3.27416 | 41.8992  | 4.08392    | Down |
| NM_009960    | Pcdha11       | -2.93079 | 1 | -4.18383 | 2.33459  | 0.109312   | Down |
| NM_009957    | Pcdha7        | -2.92127 | 1 | -4.13407 | 2.52578  | 0.123896   | Down |
| NM_001163559 | Lrriq1        | -2.91892 | 1 | -3.28006 | 12.0284  | 1.16633    | Down |
| NM_198299    | E130303B06Rik | -2.91872 | 1 | -3.50673 | 20.0838  | 1.63034    | Down |
| NM_001163267 | Ccdc147       | -2.9181  | 1 | -3.35956 | 12.9385  | 1.18042    | Down |
| NM_029859    | 4921530D09Rik | -2.91755 | 1 | -3.23766 | 45.7347  | 4.57798    | Down |
| NM_001177380 | Cypt15        | -2.91655 | 1 | -4.71904 | 7.53437  | 0.138593   | Down |
| NM_183089    | Dssc1         | -2.91655 | 1 | -4.71904 | 2.98152  | 0.0548441  | Down |
| NM_001178058 | Txnrd3        | -2.91343 | 1 | -3.21374 | 31.3078  | 3.18958    | Down |
| NM_001034893 | Zfp936        | -2.91228 | 1 | -4.39711 | 2.5396   | 0.0926036  | Down |
| NM_029115    | 4930455F23Rik | -2.90531 | 1 | -3.13374 | 78.5148  | 8.48163    | Down |
| NM_027406    | Aldh1l1       | -2.90378 | 1 | -3.72072 | 4.81342  | 0.325899   | Down |
| NM_001013771 | Gm973         | -2.90326 | 1 | -3.55385 | 5.89337  | 0.459302   | Down |
| NM_013787    | Skp2          | -2.90131 | 1 | -3.28668 | 17.2057  | 1.65809    | Down |
| NM_001033443 | Cdkl4         | -2.89663 | 1 | -3.46014 | 9.32093  | 0.783798   | Down |
| NM_022653    | Thop1         | -2.89342 | 1 | -3.26098 | 23.186   | 2.27732    | Down |
| NM_177603    | Frat2         | -2.89249 | 1 | -3.75122 | 6.55592  | 0.432476   | Down |
| NM_001033492 | Mageb4        | -2.88972 | 1 | -5.6935  | 1.59646  | 0          | Down |
| NM_001167913 | Smok2b        | -2.88972 | 1 | -4.6935  | 2.41989  | 0.0453226  | Down |
| NM_011674    | Ugt8a         | -2.88972 | 1 | -4.6935  | 1.06505  | 0.0199475  | Down |
| NR_027843    | 4933432I09Rik | -2.88972 | 1 | -4.6935  | 2.54017  | 0.0475752  | Down |
| NM_030028    | Tmem190       | -2.8895  | 1 | -4.10338 | 22.0396  | 1.10448    | Down |
| NM_001033040 | Gm166         | -2.88862 | 1 | -3.07941 | 82.1695  | 9.22865    | Down |
| NM_026514    | Cdc42ep3      | -2.8777  | 1 | -3.15815 | 50.2767  | 5.32866    | Down |
| NM_027651    | Tmem30c       | -2.87373 | 1 | -3.53751 | 14.5236  | 1.14284    | Down |
| NM_001004187 | 2610020H08Rik | -2.86901 | 1 | -3.52035 | 11.609   | 0.926075   | Down |
| NM_011393    | Slc1a2        | -2.86841 | 1 | -4.44073 | 3.04722  | 0.101257   | Down |
| NM_026296    | 4930548H24Rik | -2.86841 | 1 | -4.44073 | 4.54201  | 0.150927   | Down |
| NM_178200    | Hist1h2bm     | -2.86521 | 1 | -4.07992 | 33.2916  | 1.69585    | Down |
| NM_080847    | Asb15         | -2.86355 | 1 | -4.27846 | 2.04115  | 0.0841038  | Down |
| NM_001099305 | Gm6880        | -2.8624  | 1 | -5.6675  | 6.00226  | 0          | Down |
| NM_001122977 | Gm7168        | -2.8624  | 1 | -4.6675  | 2.34773  | 0.0447854  | Down |
| NM_009951    | Igf2bp1       | -2.8624  | 1 | -4.6675  | 0.449042 | 0.00856592 | Down |
| NM_010606    | Kcnj6         | -2.8624  | 1 | -5.6675  | 1.21951  | 0          | Down |
| NM_026634    | A930018P22Rik | -2.8624  | 1 | -4.6675  | 4.59514  | 0.0876569  | Down |
| NR_015485    | 1700108F19Rik | -2.8624  | 1 | -4.6675  | 4.33574  | 0.0827085  | Down |
| NM_001162973 | Lrrc51        | -2.85842 | 1 | -3.06722 | 211.915  | 23.9893    | Down |
| NM_007428    | Agt           | -2.85157 | 1 | -3.04319 | 109.826  | 12.6483    | Down |
| NM_010655    | Kpna2         | -2.84937 | 1 | -3.09765 | 60.1521  | 6.65775    | Down |
| NM_025863    | Trim59        | -2.84556 | 1 | -3.5529  | 6.03846  | 0.467133   | Down |
| NM_001122735 | Gm15091       | -2.83952 | 1 | -4.25538 | 4.23111  | 0.177174   | Down |
| NM_009860    | Cdc25c        | -2.83952 | 1 | -4.25538 | 4.4164   | 0.184933   | Down |
| NM_139292    | Reep6         | -2.83549 | 1 | -3.11368 | 48.5362  | 5.30598    | Down |
| NM_029489    | Samd7         | -2.83455 | 1 | -5.64103 | 1.15754  | 0          | Down |
| NM_177465    | Umodl1        | -2.83455 | 1 | -5.64103 | 0.732446 | 0          | Down |
| NM_001111118 | Rad51ap2      | -2.83387 | 1 | -4.51064 | 1.60239  | 0.0452227  | Down |
| NM_028554    | 1700072E05Rik | -2.83387 | 1 | -4.51064 | 4.85457  | 0.137006   | Down |
| NM_009648    | Akap1         | -2.83277 | 1 | -2.97756 | 92.412   | 11.1516    | Down |
| NM_001114400 | Gm15127       | -2.82736 | 1 | -4.2437  | 4.31163  | 0.182026   | Down |
| NM_153082    | Dnajc27       | -2.82687 | 1 | -3.11252 | 19.6376  | 2.14779    | Down |
| NM_009959    | Pcdha5        | -2.82581 | 1 | -4.08254 | 2.19547  | 0.11032    | Down |
| NM_016910    | Ppm1d         | -2.82547 | 1 | -3.08909 | 37.2306  | 4.14274    | Down |
| NM_007767    | Pcdha6        | -2.82379 | 1 | -4.03995 | 2.35323  | 0.123258   | Down |
| NM_025949    | Rps6ka6       | -2.82304 | 1 | -3.58658 | 3.55411  | 0.266262   | Down |
| NM_001134385 | Gpr160        | -2.82034 | 1 | -3.16275 | 29.6653  | 3.12418    | Down |
| NM_030597    | Lsm2          | -2.81923 | 1 | -3.34902 | 33.3314  | 3.03921    | Down |
| NM_001190869 | Kcne3         | -2.81687 | 1 | -3.30216 | 25.6378  | 2.42537    | Down |
| NM_001159652 | Gpr62         | -2.80688 | 1 | -4.02365 | 6.15662  | 0.326158   | Down |
| NM_181544    | Pkd1l3        | -2.80647 | 1 | -3.26519 | 5.82934  | 0.567122   | Down |
| NM_028671    | Fam122c       | -2.80614 | 1 | -4.61407 | 4.92396  | 0.0975421  | Down |
| NM_031377    | Pramel1       | -2.80614 | 1 | -5.61407 | 1.48526  | 0          | Down |
| NM_031381    | Tex13         | -2.80614 | 1 | -5.61407 | 1.71268  | 0          | Down |
| NM_175280    | 4930529M08Rik | -2.80614 | 1 | -4.61407 | 2.32161  | 0.0459904  | Down |
| NM_198191    | Pip5kl1       | -2.80614 | 1 | -5.61407 | 2.46031  | 0          | Down |
| NM_001164045 | Ccl27a        | -2.80589 | 1 | -3.1926  | 58.5516  | 6.02328    | Down |
| NM_011759    | Zfp41         | -2.8047  | 1 | -3.29516 | 8.89578  | 0.845278   | Down |
| NM_172755    | Sugp2         | -2.8047  | 1 | -3.00961 | 44.4268  | 5.23495    | Down |
| NM_181728    | Art3          | -2.80315 | 1 | -3.11416 | 49.6724  | 5.41992    | Down |
| NM_008182    | Gsta2         | -2.80287 | 1 | -4.378   | 7.25459  | 0.251898   | Down |
| NM_029459    | Prame         | -2.80287 | 1 | -4.378   | 2.73607  | 0.0950035  | Down |
| NM_153601    | Lgsn          | -2.80287 | 1 | -4.378   | 3.25942  | 0.113175   | Down |
| NM_177222    | Casc1         | -2.80184 | 1 | -3.2874  | 13.339   | 1.2749     | Down |
| NM_001163483 | 1700020A23Rik | -2.8017  | 1 | -4.10531 | 14.6931  | 0.715864   | Down |

|                |               |          |   |          |          |           |      |
|----------------|---------------|----------|---|----------|----------|-----------|------|
| NM_001177324   | Sept6         | -2.78735 | 1 | -3.33806 | 7.67004  | 0.703225  | Down |
| NM_001045524   | AK129341      | -2.78705 | 1 | -3.03719 | 31.894   | 3.68108   | Down |
| NM_029772      | Catsper3      | -2.77972 | 1 | -4.03815 | 8.45246  | 0.438084  | Down |
| NM_001141922   | Bean1         | -2.77716 | 1 | -4.58658 | 1.04817  | 0.021171  | Down |
| NM_008703      | Nmbr          | -2.77716 | 1 | -4.58658 | 3.03013  | 0.0612029 | Down |
| NM_013927      | Cngb3         | -2.77716 | 1 | -5.58658 | 0.754957 | 0         | Down |
| NM_080858      | Asb12         | -2.77716 | 1 | -4.58658 | 2.8209   | 0.056977  | Down |
| NM_146227      | Prss50        | -2.77716 | 1 | -4.58658 | 2.44285  | 0.0493409 | Down |
| NM_172834      | Loxhd1        | -2.77716 | 1 | -4.58658 | 0.538945 | 0.0108857 | Down |
| NR_029433      | 1700003G18Rik | -2.77716 | 1 | -4.58658 | 5.73281  | 0.115792  | Down |
| NM_007659      | Cdk1          | -2.77568 | 1 | -3.3416  | 8.79691  | 0.803256  | Down |
| NM_053090      | Fam126a       | -2.76987 | 1 | -3.09173 | 12.6254  | 1.39844   | Down |
| NM_174848      | Crybg3        | -2.76781 | 1 | -2.97735 | 24.6758  | 2.97301   | Down |
| NM_008651      | Mybl1         | -2.7633  | 1 | -3.11881 | 16.5423  | 1.79477   | Down |
| NM_201243      | Pcdha8        | -2.76086 | 1 | -4.02    | 2.08733  | 0.109563  | Down |
| NM_026091      | 1700037H04Rik | -2.7553  | 1 | -3.04668 | 68.7382  | 7.8675    | Down |
| NM_001171640   | 1700007I08Rik | -2.75216 | 1 | -4.17155 | 5.386    | 0.239144  | Down |
| NM_029482      | 4930579G24Rik | -2.75052 | 1 | -3.32494 | 12.2467  | 1.13028   | Down |
| NM_001045539   | Xlr5a         | -2.74761 | 1 | -5.55857 | 2.11191  | 0         | Down |
| NM_001195094   | Ccdc42b       | -2.74761 | 1 | -4.55857 | 3.78355  | 0.0779489 | Down |
| NM_015798      | Fbxo15        | -2.74761 | 1 | -4.55857 | 2.19713  | 0.0452654 | Down |
| NM_021347      | Gsdma         | -2.74761 | 1 | -5.55857 | 1.2783   | 0         | Down |
| NM_133882      | C8b           | -2.74761 | 1 | -4.55857 | 1.55634  | 0.0320639 | Down |
| NR_038039      | 1700023F02Rik | -2.74761 | 1 | -5.55857 | 10.1004  | 0         | Down |
| NM_001199025   | Pla2g6        | -2.7468  | 1 | -2.98274 | 41.4065  | 4.96564   | Down |
| NM_178689      | Eno4          | -2.74618 | 1 | -3.49101 | 5.91861  | 0.475437  | Down |
| NM_001029838   | Pknox2        | -2.74578 | 1 | -3.26466 | 8.2849   | 0.802019  | Down |
| NM_178702      | Radil         | -2.74307 | 1 | -3.45296 | 4.47308  | 0.370962  | Down |
| NM_009554      | Zfp37         | -2.74267 | 1 | -2.99389 | 31.3706  | 3.73096   | Down |
| NM_001039371   | Slc22a15      | -2.74148 | 1 | -3.28608 | 3.97915  | 0.37853   | Down |
| NM_011353      | Serf1         | -2.73363 | 1 | -3.05323 | 119.981  | 13.6513   | Down |
| NM_138661      | Pcdha9        | -2.72826 | 1 | -3.94792 | 2.16608  | 0.120973  | Down |
| NM_022565      | Ndst4         | -2.72798 | 1 | -4.40971 | 1.3583   | 0.0411527 | Down |
| NM_001166630_4 | Dynlt1c       | -2.72591 | 1 | -2.91168 | 286.515  | 36.1545   | Down |
| NM_144539      | Slamf7        | -2.7248  | 1 | -3.29977 | 5.95816  | 0.559598  | Down |
| NM_001166627_4 | Dynlt1f       | -2.72457 | 1 | -2.91009 | 245.864  | 31.0591   | Down |
| NM_001199947_4 | Dynlt1e       | -2.72457 | 1 | -2.91009 | 245.864  | 31.0591   | Down |
| NM_170671      | Mycbpap       | -2.71937 | 1 | -2.94993 | 44.5578  | 5.46769   | Down |
| NM_022321      | Parvg         | -2.7191  | 1 | -3.5415  | 4.93494  | 0.378559  | Down |
| NM_001033234   | Gm9           | -2.71742 | 1 | -5.53    | 2.05349  | 0         | Down |
| NM_001081023   | Cacna1s       | -2.71742 | 1 | -5.53    | 0.546305 | 0         | Down |
| NM_008110      | Gdf9          | -2.71742 | 1 | -4.53    | 1.89299  | 0.0397954 | Down |
| NM_029131      | 4930503E14Rik | -2.71742 | 1 | -5.53    | 2.6493   | 0         | Down |
| NR_003645      | Ube2dn1       | -2.71742 | 1 | -5.53    | 4.59617  | 0         | Down |
| NM_197987      | Trim37        | -2.71474 | 1 | -2.89589 | 36.771   | 4.69172   | Down |
| NM_148946      | Slc8a2        | -2.71303 | 1 | -4.13407 | 1.85958  | 0.0847591 | Down |
| NM_025491      | Susd3         | -2.71229 | 1 | -3.36727 | 16.2657  | 1.44335   | Down |
| NM_177123      | Spef2         | -2.70409 | 1 | -3.17303 | 11.3324  | 1.17454   | Down |
| NM_028270      | Aldh1b1       | -2.70283 | 1 | -3.70206 | 5.08619  | 0.34305   | Down |
| NM_009698      | Aprt          | -2.70194 | 1 | -3.12318 | 47.7228  | 5.13977   | Down |
| NM_144538      | Rab3il1       | -2.70078 | 1 | -2.95178 | 47.253   | 5.7866    | Down |
| NM_001033206   | Pwwp2b        | -2.69648 | 1 | -2.96143 | 42.2336  | 5.13451   | Down |
| NM_001004191   | Gm5617        | -2.69545 | 1 | -2.94093 | 181.557  | 22.4061   | Down |
| NM_001164658   | Catsperg1     | -2.69436 | 1 | -2.94353 | 31.055   | 3.82509   | Down |
| NM_198628      | Gm711         | -2.69145 | 1 | -3.33505 | 8.73973  | 0.794368  | Down |
| NM_026257      | Ubxn11        | -2.68981 | 1 | -3.24989 | 15.6016  | 1.51963   | Down |
| NM_021329      | Rangrf        | -2.6886  | 1 | -3.01429 | 83.5613  | 9.76502   | Down |
| NM_001166629   | Dynlt1a       | -2.6874  | 1 | -2.85789 | 307.81   | 40.3342   | Down |
| NM_001081007   | Zfp382        | -2.68723 | 1 | -3.51064 | 5.84747  | 0.45831   | Down |
| NM_029372      | 1700011F14Rik | -2.68661 | 1 | -4.50086 | 3.08035  | 0.0661059 | Down |
| NM_133239      | Crb1          | -2.68661 | 1 | -4.50086 | 0.711455 | 0.0152682 | Down |
| NR_028265      | Mirg          | -2.68661 | 1 | -4.50086 | 2.57526  | 0.0552663 | Down |
| NR_034074      | Etd           | -2.68661 | 1 | -4.50086 | 6.99845  | 0.15019   | Down |
| NM_011105      | Pkdrej        | -2.68653 | 1 | -3.0905  | 6.27019  | 0.691667  | Down |
| NM_138663      | Pcdha12       | -2.685   | 1 | -3.68489 | 2.20195  | 0.150305  | Down |
| NM_019493      | Btg4          | -2.68334 | 1 | -4.36727 | 3.50857  | 0.109521  | Down |
| NM_001034882   | Gm5465        | -2.68217 | 1 | -3.16994 | 10.4469  | 1.08336   | Down |
| NM_029098      | Lmbr1l        | -2.67916 | 1 | -2.97882 | 35.6344  | 4.27367   | Down |
| NM_023294      | Ndc80         | -2.67314 | 1 | -3.32909 | 8.2327   | 0.750201  | Down |
| NM_020052      | Scube2        | -2.67141 | 1 | -4.03299 | 2.40658  | 0.120928  | Down |
| NM_001098267   | Tll2          | -2.67098 | 1 | -3.46357 | 8.15875  | 0.663503  | Down |
| NM_009191      | Clpb          | -2.66539 | 1 | -2.9094  | 25.2117  | 3.18041   | Down |
| NM_172434      | Celf3         | -2.66395 | 1 | -3.53    | 4.4193   | 0.340118  | Down |
| NM_001097980   | Gm16390       | -2.66051 | 1 | -4.34558 | 4.1906   | 0.132823  | Down |
| NM_178683      | Depdc1b       | -2.66051 | 1 | -4.34558 | 1.79053  | 0.0567518 | Down |
| NM_027982      | Ppm1j         | -2.6562  | 1 | -3.26861 | 11.7911  | 1.12695   | Down |

|              |               |          |   |          |          |           |      |
|--------------|---------------|----------|---|----------|----------|-----------|------|
| NM_008915    | Ppp3cc        | -2.65613 | 1 | -2.90261 | 56.706   | 7.18647   | Down |
| NM_007810    | Cyp19a1       | -2.65512 | 1 | -4.47111 | 1.38035  | 0.0302533 | Down |
| NM_153106    | Padi6         | -2.65512 | 1 | -5.47111 | 1.40402  | 0         | Down |
| NM_028886    | Lrguk         | -2.65422 | 1 | -3.57802 | 3.80599  | 0.281717  | Down |
| NM_010758    | Mag           | -2.65344 | 1 | -3.96296 | 3.8479   | 0.207061  | Down |
| NM_001113211 | Tmem194       | -2.65207 | 1 | -2.93592 | 14.0292  | 1.73466   | Down |
| NM_001099636 | Pnmal2        | -2.65168 | 1 | -3.07377 | 9.62962  | 1.07332   | Down |
| NM_019723    | Slc22a21      | -2.64933 | 1 | -3.02245 | 21.8454  | 2.53159   | Down |
| NM_013923    | Rnf19a        | -2.64913 | 1 | -2.79099 | 74.8107  | 10.275    | Down |
| NM_178678    | Lrrtm3        | -2.6469  | 1 | -4.00953 | 2.18921  | 0.111824  | Down |
| NM_009406    | Tnni3         | -2.64537 | 1 | -4.06937 | 9.13451  | 0.435625  | Down |
| NM_133786    | Smc4          | -2.64109 | 1 | -2.84843 | 37.3733  | 4.92442   | Down |
| NM_023790    | Wdr54         | -2.63274 | 1 | -3.34558 | 12.0464  | 1.07658   | Down |
| NM_001113369 | Ceacam2       | -2.63239 | 1 | -3.31546 | 5.00381  | 0.458658  | Down |
| NM_013733    | Chaf1a        | -2.63211 | 1 | -3.01437 | 14.3473  | 1.67107   | Down |
| NM_144518    | 2900011O08Rik | -2.63145 | 1 | -4.05607 | 3.16652  | 0.152422  | Down |
| NR_033121_2  | Gm8348        | -2.62694 | 1 | -3.2502  | 9.70098  | 0.937973  | Down |
| NM_130893    | Scrt1         | -2.62469 | 1 | -4.20807 | 1.373    | 0.053709  | Down |
| NM_001013816 | Gm5622        | -2.62292 | 1 | -5.44073 | 2.02775  | 0         | Down |
| NM_001045531 | Spata22       | -2.62292 | 1 | -4.44073 | 2.51639  | 0.0563508 | Down |
| NM_009710    | Art1          | -2.62292 | 1 | -5.44073 | 2.26244  | 0         | Down |
| NM_023814    | Tbx18         | -2.62292 | 1 | -4.44073 | 0.685162 | 0.0153432 | Down |
| NM_001024848 | Apol7b        | -2.62197 | 1 | -3.98568 | 3.72405  | 0.19342   | Down |
| NM_001004357 | Cntnap2       | -2.6213  | 1 | -3.44686 | 1.75604  | 0.14389   | Down |
| NM_213614    | Sept5         | -2.62014 | 1 | -3.16051 | 11.6974  | 1.21508   | Down |
| NM_145500    | Ubd1          | -2.61877 | 1 | -2.97087 | 35.9647  | 4.21532   | Down |
| NM_009791    | Aspm          | -2.61191 | 1 | -3.17372 | 2.33817  | 0.240128  | Down |
| NM_001033599 | Acsl6         | -2.61145 | 1 | -3.36008 | 5.01225  | 0.441072  | Down |
| NM_009961    | Pcdha10       | -2.60894 | 1 | -3.53443 | 2.15381  | 0.164344  | Down |
| NM_001003955 | Rab11fip5     | -2.60561 | 1 | -2.80979 | 25.1163  | 3.39964   | Down |
| NM_133706    | Tmem97        | -2.60109 | 1 | -2.76969 | 166.625  | 23.2122   | Down |
| NM_144528    | Rnf126        | -2.60063 | 1 | -2.91295 | 42.3445  | 5.31289   | Down |
| NM_027402    | Fndc5         | -2.60042 | 1 | -3.86597 | 3.63683  | 0.212557  | Down |
| NM_029196    | 4930544O15Rik | -2.60014 | 1 | -3.70284 | 13.1207  | 0.87764   | Down |
| NM_010360    | Gstm5         | -2.59579 | 1 | -2.76331 | 246.106  | 34.4376   | Down |
| NM_145447    | Mfsd7c        | -2.59466 | 1 | -3.21872 | 5.49834  | 0.543396  | Down |
| NR_027510    | Lrrc57        | -2.59438 | 1 | -2.85251 | 49.8112  | 6.53313   | Down |
| NM_198033    | Setx          | -2.59413 | 1 | -2.65856 | 132.95   | 20.0386   | Down |
| NM_010787    | Mea1          | -2.59374 | 1 | -2.76017 | 269.977  | 37.8612   | Down |
| NM_001033409 | Lgr6          | -2.58999 | 1 | -5.40971 | 0.865631 | 0         | Down |
| NM_015780    | Cfhr1         | -2.58999 | 1 | -4.40971 | 1.81073  | 0.0414498 | Down |
| NM_134252    | Trpm8         | -2.58999 | 1 | -5.40971 | 0.815864 | 0         | Down |
| NM_172290    | Ntm           | -2.58999 | 1 | -4.40971 | 1.73461  | 0.0397074 | Down |
| NM_152947    | Ovol2         | -2.58915 | 1 | -3.15916 | 18.2707  | 1.89391   | Down |
| NM_001033485 | BC048644      | -2.58272 | 1 | -3.58658 | 4.77983  | 0.349425  | Down |
| NM_001081332 | Slc9a5        | -2.57945 | 1 | -3.23782 | 3.25643  | 0.316199  | Down |
| NM_017397    | Ddx20         | -2.57894 | 1 | -2.77477 | 60.5377  | 8.39769   | Down |
| NM_197988    | 1190005I06Rik | -2.57237 | 1 | -4.07201 | 8.54546  | 0.391231  | Down |
| NM_007971    | Ezh2          | -2.57115 | 1 | -3.00439 | 13.6653  | 1.59716   | Down |
| NM_024269    | Arl2bp        | -2.56923 | 1 | -2.96209 | 57.9689  | 6.99698   | Down |
| NM_032465    | Cd96          | -2.56825 | 1 | -3.83516 | 4.40973  | 0.263332  | Down |
| NM_053272    | Dhcr24        | -2.56689 | 1 | -3.33784 | 3.20089  | 0.285168  | Down |
| NM_026300    | 4930549C01Rik | -2.56665 | 1 | -4.15293 | 7.90547  | 0.321452  | Down |
| NM_010016    | Cd55          | -2.56533 | 1 | -2.96076 | 16.9404  | 2.0463    | Down |
| NM_028679    | Irak3         | -2.56511 | 1 | -3.0367  | 10.3988  | 1.18483   | Down |
| NM_054072    | Pcdha1        | -2.56589 | 1 | -3.78339 | 1.96543  | 0.123117  | Down |
| NM_001004180 | BC057022      | -2.5563  | 1 | -4.378   | 1.13869  | 0.0266584 | Down |
| NM_001039116 | Dmrtc1b       | -2.5563  | 1 | -4.378   | 2.58994  | 0.0606343 | Down |
| NM_001080709 | 4930402F06Rik | -2.5563  | 1 | -5.378   | 2.23505  | 0         | Down |
| NM_001177389 | 4933403O08Rik | -2.5563  | 1 | -5.378   | 2.01743  | 0         | Down |
| NM_009918    | Cnga3         | -2.5563  | 1 | -5.378   | 0.876641 | 0         | Down |
| NM_010250    | Gabra1        | -2.5563  | 1 | -5.378   | 0.739448 | 0         | Down |
| NM_145833    | Lin28a        | -2.5563  | 1 | -5.378   | 0.881175 | 0         | Down |
| NM_024184    | Asf1b         | -2.55583 | 1 | -3.25538 | 9.41443  | 0.897948  | Down |
| NM_001033149 | Ttc9          | -2.55505 | 1 | -3.21407 | 8.19114  | 0.808615  | Down |
| NM_008115    | Gfra2         | -2.55267 | 1 | -3.48033 | 3.14041  | 0.248842  | Down |
| NM_180958    | Ccdc79        | -2.55267 | 1 | -3.09454 | 8.05603  | 0.876093  | Down |
| NM_001081977 | Rnf144a       | -2.54945 | 1 | -3.26466 | 2.79474  | 0.264244  | Down |
| NM_028916    | Efhc2         | -2.54795 | 1 | -3.14416 | 7.8043   | 0.815168  | Down |
| NM_028849    | Cldnd2        | -2.54678 | 1 | -4.13407 | 8.48534  | 0.349631  | Down |
| NM_177135    | D830030K20Rik | -2.54678 | 1 | -4.13407 | 3.68616  | 0.151885  | Down |
| NR_024017    | 4930594C11Rik | -2.5464  | 1 | -3.81425 | 3.44038  | 0.208467  | Down |
| NM_028748    | Paqr5         | -2.54483 | 1 | -2.86832 | 17.6024  | 2.2768    | Down |
| NM_001109764 | Ctnna2        | -2.54366 | 1 | -3.54911 | 2.5481   | 0.191211  | Down |
| NM_001042652 | Nusap1        | -2.54269 | 1 | -3.20205 | 5.7976   | 0.577138  | Down |
| NM_001003917 | Atg9a         | -2.54222 | 1 | -2.75011 | 37.9941  | 5.35953   | Down |

|              |               |          |   |          |          |           |      |
|--------------|---------------|----------|---|----------|----------|-----------|------|
| NM_010026    | Asap1         | -2.53995 | 1 | -2.83195 | 16.2749  | 2.16219   | Down |
| NM_173775    | Ccdc37        | -2.53871 | 1 | -2.97945 | 16.0805  | 1.9113    | Down |
| NM_013552    | Hmmr          | -2.53483 | 1 | -3.15025 | 4.77203  | 0.495237  | Down |
| NM_028521    | Phospho2      | -2.53349 | 1 | -2.69224 | 113.947  | 16.7535   | Down |
| NM_025961    | Gatm          | -2.53155 | 1 | -2.858   | 25.488   | 3.31999   | Down |
| NM_001081258 | Kif14         | -2.53116 | 1 | -3.89897 | 0.890035 | 0.0491158 | Down |
| NM_007857    | Dhh           | -2.53116 | 1 | -3.89897 | 3.29768  | 0.18198   | Down |
| NM_029064    | Till9         | -2.5287  | 1 | -3.21462 | 9.91108  | 0.974538  | Down |
| NM_001168297 | Fbxo30        | -2.52609 | 1 | -2.71723 | 33.6974  | 4.86546   | Down |
| NM_009620    | Adam4         | -2.52594 | 1 | -2.91707 | 18.3056  | 2.28006   | Down |
| NM_134126    | Ift140        | -2.52195 | 1 | -2.72042 | 26.6212  | 3.83446   | Down |
| NM_001033334 | Tmem90a       | -2.5218  | 1 | -5.34558 | 1.1992   | 0         | Down |
| NR_033448    | 1700025C18Rik | -2.5218  | 1 | -5.34558 | 4.26894  | 0         | Down |
| NM_009181    | St8sia2       | -2.5215  | 1 | -4.02365 | 1.12805  | 0.0534258 | Down |
| NM_028915    | Lrrcc1        | -2.5198  | 1 | -2.77472 | 28.4042  | 3.93258   | Down |
| NM_177747    | Zfp711        | -2.51822 | 1 | -3.13407 | 4.26527  | 0.447657  | Down |
| NM_182991    | Tmem59l       | -2.51772 | 1 | -3.88615 | 5.20236  | 0.289674  | Down |
| NM_029682    | Stambpl1      | -2.51588 | 1 | -3.74413 | 5.0737   | 0.326653  | Down |
| NM_201368    | Xkr8          | -2.51572 | 1 | -2.92539 | 9.17618  | 1.13497   | Down |
| NM_009342    | Dynlt1b       | -2.5152  | 1 | -2.66555 | 342.31   | 51.2793   | Down |
| NM_001163533 | Rtdr1         | -2.51499 | 1 | -3.94504 | 5.73533  | 0.298383  | Down |
| NM_153679    | Cpt1c         | -2.51309 | 1 | -2.94409 | 13.0097  | 1.58596   | Down |
| NM_001081423 | Till5         | -2.51177 | 1 | -2.8136  | 14.2236  | 1.91304   | Down |
| NM_146144    | Usp1          | -2.50915 | 1 | -2.67622 | 59.9824  | 8.91601   | Down |
| NM_013726    | Dbf4          | -2.50209 | 1 | -2.90382 | 16.3681  | 2.05621   | Down |
| NM_017400    | Sh3gl3        | -2.50042 | 1 | -2.94915 | 20.3543  | 2.46936   | Down |
| NM_054073    | Tsga13        | -2.49907 | 1 | -3.12561 | 15.5145  | 1.6359    | Down |
| NM_206935    | Arl9          | -2.48962 | 1 | -4.18383 | 10.0803  | 0.35806   | Down |
| NM_029197    | 4930528F23Rik | -2.48657 | 1 | -3.99048 | 3.47851  | 0.168622  | Down |
| NM_001024137 | Pla2g4d       | -2.48646 | 1 | -5.31241 | 0.89078  | 0         | Down |
| NM_133657    | Cyp2a12       | -2.48646 | 1 | -5.31241 | 1.75908  | 0         | Down |
| NR_015527    | 4930417O13Rik | -2.48646 | 1 | -5.31241 | 2.67805  | 0         | Down |
| NM_146208    | Neil3         | -2.48547 | 1 | -4.07597 | 2.2272   | 0.0955938 | Down |
| NM_010274    | Gpd2          | -2.48498 | 1 | -2.71592 | 20.0894  | 2.89974   | Down |
| NM_028349    | Sass6         | -2.48468 | 1 | -3.12234 | 4.00969  | 0.423196  | Down |
| NM_028902    | Hsf2bp        | -2.48313 | 1 | -2.98513 | 9.14006  | 1.07674   | Down |
| NM_172525    | Arhgap29      | -2.48026 | 1 | -2.6983  | 24.7006  | 3.61071   | Down |
| NM_172578    | Mis18bp1      | -2.47618 | 1 | -3.08345 | 4.59762  | 0.50041   | Down |
| NR_027509    | Suv39h2       | -2.47535 | 1 | -3.03299 | 5.20675  | 0.590158  | Down |
| NM_177777    | D11Wsu47e     | -2.47458 | 1 | -2.70515 | 51.2541  | 7.45371   | Down |
| NM_001197082 | Rcc1          | -2.47448 | 1 | -2.73976 | 36.9879  | 5.24472   | Down |
| NM_011758    | Zfp39         | -2.47013 | 1 | -2.71001 | 26.7485  | 3.87561   | Down |
| NR_033123    | 4933409K07Rik | -2.46971 | 1 | -2.74444 | 17.6415  | 2.49241   | Down |
| NR_029439    | 1700018A04Rik | -2.46878 | 1 | -3.9011  | 9.37048  | 0.502738  | Down |
| NM_199455    | Tepp          | -2.46444 | 1 | -4.05607 | 5.11706  | 0.222723  | Down |
| NM_173425    | Fam124b       | -2.46348 | 1 | -4.15916 | 1.38801  | 0.0501684 | Down |
| NM_026410    | Cdca5         | -2.46293 | 1 | -3.6935  | 5.08254  | 0.338992  | Down |
| NR_033589    | Hmgb1-rs17    | -2.45852 | 1 | -2.9238  | 20.5178  | 2.5303    | Down |
| NM_182995    | 6330503K22Rik | -2.45713 | 1 | -2.67501 | 24.7989  | 3.68416   | Down |
| NR_004843    | BC090627      | -2.45698 | 1 | -2.67568 | 27.2337  | 4.04389   | Down |
| NM_029632    | Ppp1r11       | -2.45632 | 1 | -2.62664 | 118.964  | 18.3005   | Down |
| NM_001039669 | Iffo1         | -2.45594 | 1 | -3.04569 | 6.78971  | 0.760229  | Down |
| NM_001033415 | Shisa3        | -2.45554 | 1 | -3.72745 | 4.37503  | 0.281671  | Down |
| NM_019914    | Milt11        | -2.45195 | 1 | -2.74413 | 28.11    | 3.96935   | Down |
| NR_037982    | 9330159M07Rik | -2.4518  | 1 | -3.07962 | 6.22078  | 0.677273  | Down |
| NM_010338    | Gpr37         | -2.45077 | 1 | -3.95653 | 1.80484  | 0.0895987 | Down |
| NM_001081954 | Dux           | -2.45023 | 1 | -5.27846 | 1.41107  | 0         | Down |
| NM_001162369 | Mgat4c        | -2.45023 | 1 | -4.27846 | 0.765241 | 0.0192263 | Down |
| NM_010341    | Nmur1         | -2.45023 | 1 | -5.27846 | 2.34599  | 0         | Down |
| NM_010445    | Hmx1          | -2.45023 | 1 | -5.27846 | 1.89483  | 0         | Down |
| NM_177303    | Lrrn4         | -2.45023 | 1 | -4.27846 | 0.822276 | 0.0206593 | Down |
| NM_206816    | Olf128        | -2.45023 | 1 | -5.27846 | 3.08243  | 0         | Down |
| NM_029044    | Lrrc48        | -2.44407 | 1 | -3.0257  | 10.5402  | 1.1978    | Down |
| NM_013815    | Baz1a         | -2.44375 | 1 | -2.62783 | 27.5997  | 4.24077   | Down |
| NM_029426    | Brsk2         | -2.44344 | 1 | -3.37553 | 2.49765  | 0.212924  | Down |
| NM_027878    | Dram1         | -2.44167 | 1 | -3.08052 | 5.8843   | 0.639392  | Down |
| NM_027139    | Taf9          | -2.44057 | 1 | -2.57361 | 261.676  | 41.7949   | Down |
| NM_025951    | Pi4k2b        | -2.43849 | 1 | -2.89613 | 9.63579  | 1.21214   | Down |
| NM_001039556 | Rad54b        | -2.43713 | 1 | -3.87104 | 2.28104  | 0.124984  | Down |
| NM_001033770 | Gm904         | -2.43686 | 1 | -4.13407 | 6.01357  | 0.221236  | Down |
| NM_028888    | 4931428F04Rik | -2.43606 | 1 | -2.85298 | 10.1018  | 1.31337   | Down |
| NM_177472    | Slx4          | -2.43492 | 1 | -2.66401 | 19.5057  | 2.91895   | Down |
| NM_025747    | 4933411K20Rik | -2.43473 | 1 | -2.57262 | 65.7483  | 10.5075   | Down |
| NM_177773    | 4933408B17Rik | -2.43405 | 1 | -3.1696  | 5.42909  | 0.547095  | Down |
| NM_194269    | Morn2         | -2.43296 | 1 | -2.83075 | 60.4293  | 7.9891    | Down |
| NR_015486    | D130017N08Rik | -2.42914 | 1 | -3.06835 | 9.60577  | 1.05265   | Down |



|                |               |          |   |          |          |           |      |
|----------------|---------------|----------|---|----------|----------|-----------|------|
| NM_019689      | Arid3b        | -2.42718 | 1 | -2.99344 | 5.37374  | 0.625588  | Down |
| NM_001039220   | Al429214      | -2.42378 | 1 | -2.84392 | 17.9302  | 2.34539   | Down |
| NM_172646      | Dnm3          | -2.42172 | 1 | -2.96671 | 4.7373   | 0.563066  | Down |
| NM_001160127   | Smyd1         | -2.42104 | 1 | -3.85577 | 1.92843  | 0.1068    | Down |
| NR_036590      | 1700001K23Rik | -2.4199  | 1 | -3.79304 | 14.8526  | 0.882676  | Down |
| NM_172485      | Thsd7b        | -2.41971 | 1 | -3.43047 | 1.54923  | 0.126291  | Down |
| NM_001081350   | Nol8          | -2.41942 | 1 | -2.60724 | 38.1159  | 5.94027   | Down |
| NM_001142729   | Lrrc9         | -2.41941 | 1 | -2.79419 | 17.202   | 2.33606   | Down |
| NM_025626      | Fam107b       | -2.4183  | 1 | -2.68732 | 25.7474  | 3.78567   | Down |
| NM_001168277   | Jazf1         | -2.41823 | 1 | -2.84783 | 11.4805  | 1.49667   | Down |
| NM_001033299   | Zfp217        | -2.41644 | 1 | -2.6159  | 25.2782  | 3.91472   | Down |
| NM_001177573_2 | BB287469      | -2.41307 | 1 | -5.2437  | 1.50606  | 0         | Down |
| NM_027158      | 2310043J07Rik | -2.41307 | 1 | -5.2437  | 2.67279  | 0         | Down |
| NM_028937      | Sohlh2        | -2.41307 | 1 | -5.2437  | 1.18727  | 0         | Down |
| NR_003628      | Gm5766        | -2.41307 | 1 | -4.2437  | 1.41007  | 0.0363131 | Down |
| NM_001004144   | Git1          | -2.41206 | 1 | -2.6377  | 30.9704  | 4.7205    | Down |
| NM_001164819   | 2310046K01Rik | -2.41014 | 1 | -3.04989 | 6.15953  | 0.683724  | Down |
| NM_178617      | Necab1        | -2.40927 | 1 | -2.69079 | 15.0232  | 2.20245   | Down |
| NM_001003672   | Pcdhac2       | -2.40796 | 1 | -3.64103 | 1.7224   | 0.119166  | Down |
| NM_172628      | Sh3tc2        | -2.40796 | 1 | -3.64103 | 2.05702  | 0.142317  | Down |
| NM_001004140   | Kcap2         | -2.40774 | 1 | -3.08368 | 5.62688  | 0.607229  | Down |
| NM_145145      | Pomt1         | -2.40741 | 1 | -2.72891 | 20.3281  | 2.89705   | Down |
| NM_030150      | Dhx58         | -2.40621 | 1 | -2.85687 | 12.6557  | 1.63702   | Down |
| NM_177568      | Plcb2         | -2.40614 | 1 | -3.18239 | 2.2486   | 0.223257  | Down |
| NR_030689      | 4930539J05Rik | -2.40447 | 1 | -3.10854 | 27.3443  | 2.88897   | Down |
| NM_175189      | Hepacam       | -2.39945 | 1 | -3.99467 | 1.53469  | 0.0697451 | Down |
| NM_009288      | Stk10         | -2.39837 | 1 | -2.85298 | 5.89361  | 0.764185  | Down |
| NM_133737      | Lancl2        | -2.3967  | 1 | -2.62814 | 29.1769  | 4.47589   | Down |
| NM_007884      | Epyc          | -2.39571 | 1 | -3.67042 | 4.97518  | 0.33333   | Down |
| NM_177337      | Arl11         | -2.39536 | 1 | -3.90407 | 3.7621   | 0.193768  | Down |
| NM_010264      | Nr6a1         | -2.39531 | 1 | -2.59592 | 22.6939  | 3.56343   | Down |
| NM_001081122   | Cep63         | -2.39522 | 1 | -2.52018 | 130.597  | 21.6491   | Down |
| NM_021720      | Donson        | -2.39433 | 1 | -2.77611 | 17.7607  | 2.44145   | Down |
| NM_029596      | Tssk4         | -2.39392 | 1 | -2.84116 | 27.247   | 3.56409   | Down |
| NM_008265      | Hoxa4         | -2.39057 | 1 | -2.97361 | 12.3605  | 1.45649   | Down |
| NM_178653      | Scppdh        | -2.38548 | 1 | -2.60619 | 60.4102  | 9.41276   | Down |
| NM_008089      | Gata1         | -2.38208 | 1 | -4.08254 | 2.08269  | 0.0794587 | Down |
| NM_178388      | Tmem202       | -2.38174 | 1 | -2.94174 | 16.0915  | 1.94339   | Down |
| NM_028046      | 1600014K23Rik | -2.37713 | 1 | -3.97361 | 5.55884  | 0.256396  | Down |
| NM_053180      | Cdk20         | -2.37652 | 1 | -3.11395 | 6.75186  | 0.7073    | Down |
| NM_001001714   | Sohlh1        | -2.37494 | 1 | -5.20807 | 2.11191  | 0         | Down |
| NM_001114677   | Rad21l        | -2.37494 | 1 | -4.20807 | 1.64729  | 0.0435097 | Down |
| NM_011996      | Adh4          | -2.37494 | 1 | -5.20807 | 2.07167  | 0         | Down |
| NM_028075      | Tnfrsf13c     | -2.37494 | 1 | -4.20807 | 1.42604  | 0.0376658 | Down |
| NM_023617      | Aox3          | -2.37396 | 1 | -3.60861 | 2.09399  | 0.148192  | Down |
| NM_026161      | C1qtnf4       | -2.3704  | 1 | -2.81813 | 22.1588  | 2.94527   | Down |
| NM_029407      | 4933432B09Rik | -2.36672 | 1 | -2.77367 | 6.94645  | 0.954998  | Down |
| NM_174849      | Agbl5         | -2.36504 | 1 | -2.59832 | 35.2996  | 5.52805   | Down |
| NM_001005423   | Mreg          | -2.36353 | 1 | -3.19842 | 4.13741  | 0.403158  | Down |
| NM_001004361   | 5730494M16Rik | -2.36131 | 1 | -2.59819 | 24.8174  | 3.88637   | Down |
| NM_008842      | Pim1          | -2.36123 | 1 | -2.92177 | 11.3703  | 1.39241   | Down |
| NM_011495      | Plk4          | -2.36088 | 1 | -2.78845 | 9.23476  | 1.25487   | Down |
| NM_177788      | Exoc3l        | -2.35858 | 1 | -3.63508 | 3.34928  | 0.230007  | Down |
| NM_016759      | Rundc3a       | -2.35814 | 1 | -3.06368 | 6.5402   | 0.712919  | Down |
| NM_199017      | 9230110C19Rik | -2.35775 | 1 | -2.78538 | 20.5314  | 2.79588   | Down |
| NM_001081291   | Ccdc88b       | -2.35753 | 1 | -3.03501 | 2.85293  | 0.318492  | Down |
| NM_001033247   | Wdr52         | -2.35752 | 1 | -2.74224 | 6.04507  | 0.85063   | Down |
| NM_027810      | Bbs7          | -2.35741 | 1 | -2.70172 | 18.8584  | 2.73568   | Down |
| NM_053252      | Ehbp111       | -2.3571  | 1 | -2.66688 | 15.3996  | 2.29258   | Down |
| NM_029315      | Pou5f2        | -2.35556 | 1 | -2.89561 | 15.2375  | 1.90413   | Down |
| NM_001098237   | Zbtb3         | -2.35031 | 1 | -2.86076 | 11.53    | 1.48023   | Down |
| NM_001081275   | 1700009P17Rik | -2.34956 | 1 | -2.80523 | 27.9715  | 3.74924   | Down |
| NM_183294      | Cdkl1         | -2.34941 | 1 | -3.15293 | 6.31321  | 0.637575  | Down |
| NM_027436      | Mipep         | -2.34441 | 1 | -2.69565 | 19.4654  | 2.83464   | Down |
| NM_019873      | Fkbp1         | -2.34397 | 1 | -2.6935  | 40.9461  | 5.97221   | Down |
| NM_027649      | Spats1        | -2.34323 | 1 | -3.17893 | 8.7717   | 0.866443  | Down |
| NM_024261      | 1700052N19Rik | -2.3429  | 1 | -2.62358 | 31.2249  | 4.79651   | Down |
| NM_028481      | Ccdc18        | -2.34236 | 1 | -3.04842 | 2.79849  | 0.308314  | Down |
| NM_001199123   | Spc25         | -2.34201 | 1 | -2.95298 | 10.661   | 1.27064   | Down |
| NM_008240      | Foxj1         | -2.33888 | 1 | -2.79478 | 11.1379  | 1.50377   | Down |
| NM_023463      | Ly6g6c        | -2.33774 | 1 | -3.84962 | 5.58995  | 0.299129  | Down |
| NM_001101531   | Gm5538        | -2.33577 | 1 | -5.17155 | 2.03249  | 0         | Down |
| NM_001104569   | Vmn2r107      | -2.33577 | 1 | -5.17155 | 1.0241   | 0         | Down |
| NM_020605      | Jph3          | -2.33577 | 1 | -4.17155 | 0.678537 | 0.0183938 | Down |
| NM_024230      | Smtnl1        | -2.33577 | 1 | -5.17155 | 1.50388  | 0         | Down |
| NM_026624      | Fam166a       | -2.33262 | 1 | -2.54263 | 109.986  | 17.9159   | Down |

|              |                    |          |   |          |          |           |      |
|--------------|--------------------|----------|---|----------|----------|-----------|------|
| NM_172502    | Dcaf15             | -2.32743 | 1 | -2.66905 | 21.1309  | 3.1362    | Down |
| NM_138949    | Zfp286             | -2.32326 | 1 | -3.10246 | 3.63998  | 0.382121  | Down |
| NM_001003919 | Ddx11              | -2.32057 | 1 | -2.99921 | 3.32511  | 0.380579  | Down |
| NM_028518    | Col20a1            | -2.32057 | 1 | -2.99921 | 3.29415  | 0.377035  | Down |
| NM_001146047 | Lrrc49             | -2.3144  | 1 | -2.65008 | 17.9861  | 2.70569   | Down |
| NM_028390    | Anln               | -2.31418 | 1 | -2.73353 | 6.09379  | 0.860803  | Down |
| NM_027594    | Tll7               | -2.31221 | 1 | -2.77661 | 4.49706  | 0.614507  | Down |
| NM_009713    | Arsa               | -2.3108  | 1 | -2.58521 | 20.9817  | 3.3109    | Down |
| NM_178198    | Hist1h2bj          | -2.31002 | 1 | -2.76656 | 73.9001  | 10.1751   | Down |
| NM_001177392 | Gm13547            | -2.308   | 1 | -3.90851 | 7.09117  | 0.342405  | Down |
| NM_009773    | Bub1b              | -2.30603 | 1 | -2.8755  | 5.10968  | 0.645708  | Down |
| NM_144906    | Sgjp1              | -2.30313 | 1 | -3.74413 | 1.61465  | 0.0967012 | Down |
| NM_001047604 | Ttc21b             | -2.30267 | 1 | -2.4979  | 31.3525  | 5.27024   | Down |
| NM_012012    | Exo1               | -2.3017  | 1 | -3.62761 | 1.34171  | 0.0912708 | Down |
| NM_030082    | Hist3h2ba          | -2.29802 | 1 | -3.81214 | 8.4306   | 0.463168  | Down |
| NM_027641    | Spef1              | -2.29788 | 1 | -2.89195 | 7.63421  | 0.951294  | Down |
| NM_001034880 | Gm5460             | -2.29551 | 1 | -4.13407 | 1.35504  | 0.0377252 | Down |
| NM_001037167 | Gm5647             | -2.29551 | 1 | -5.13407 | 2.88761  | 0         | Down |
| NM_181345    | Npm2               | -2.29551 | 1 | -4.13407 | 2.5864   | 0.072007  | Down |
| NR_033485    | 4933403O03Rik      | -2.29551 | 1 | -5.13407 | 1.73529  | 0         | Down |
| NR_033537    | Gm10754            | -2.29551 | 1 | -5.13407 | 1.57908  | 0         | Down |
| NM_001003910 | BC030307           | -2.29466 | 1 | -2.68289 | 8.63777  | 1.26642   | Down |
| NM_001037957 | Dyrk1b             | -2.2893  | 1 | -2.63157 | 18.889   | 2.87734   | Down |
| NM_001115076 | Camsap1            | -2.28328 | 1 | -2.43445 | 28.5044  | 5.01223   | Down |
| NM_026837    | Tmem53             | -2.27587 | 1 | -2.54377 | 78.8342  | 12.8064   | Down |
| NM_139303    | Kif18a             | -2.27493 | 1 | -2.95504 | 3.97299  | 0.468943  | Down |
| NM_172581    | Fam161b            | -2.27268 | 1 | -2.84308 | 5.46001  | 0.70572   | Down |
| NM_178628    | Atl1               | -2.27249 | 1 | -2.82135 | 6.97424  | 0.917131  | Down |
| NM_026681    | Ccdc88c            | -2.26643 | 1 | -2.55642 | 10.2125  | 1.64302   | Down |
| NM_001134767 | Ccdc62             | -2.26623 | 1 | -2.56521 | 15.4676  | 2.47239   | Down |
| NM_001040399 | Larp1b             | -2.26461 | 1 | -2.50112 | 55.55    | 9.30546   | Down |
| NM_173423    | Fem1c              | -2.26013 | 1 | -2.45965 | 45.7162  | 7.89049   | Down |
| NM_146089    | Haus1              | -2.2582  | 1 | -2.58758 | 50.0484  | 7.86554   | Down |
| NM_144818    | Ncaph              | -2.25752 | 1 | -2.98207 | 4.39785  | 0.506321  | Down |
| NM_001177632 | Ilgad              | -2.25718 | 1 | -3.77367 | 1.31632  | 0.0742985 | Down |
| NM_029992    | Tchp               | -2.25505 | 1 | -2.65632 | 12.0983  | 1.80543   | Down |
| NM_001099306 | Gm6890             | -2.2541  | 1 | -4.0956  | 3.23318  | 0.0925141 | Down |
| NM_001104615 | Vmn2r4             | -2.2541  | 1 | -5.0956  | 1.01004  | 0         | Down |
| NM_001104618 | Vmn2r5             | -2.2541  | 1 | -4.0956  | 1.01004  | 0.0289014 | Down |
| NM_007989    | Foxh1              | -2.2541  | 1 | -5.0956  | 2.07694  | 0         | Down |
| NM_008629    | Msi1               | -2.2541  | 1 | -5.0956  | 1.61763  | 0         | Down |
| NM_183248    | Nkx6-2             | -2.2541  | 1 | -4.0956  | 1.92109  | 0.0549701 | Down |
| NR_033463    | 4930429F11Rik      | -2.2541  | 1 | -5.0956  | 1.55257  | 0         | Down |
| NM_026384    | Dgat2              | -2.25218 | 1 | -2.47111 | 48.4538  | 8.29216   | Down |
| NM_001013377 | E130306D19Rik      | -2.24949 | 1 | -3.6935  | 3.56628  | 0.221304  | Down |
| NM_001033542 | Slc47a2            | -2.24792 | 1 | -2.66287 | 13.6337  | 2.02356   | Down |
| NM_013859    | Znhit2-ps          | -2.24651 | 1 | -2.49785 | 66.1034  | 11.0929   | Down |
| NM_001003671 | Pcdhac1            | -2.24538 | 1 | -3.0275  | 1.96077  | 0.216891  | Down |
| NM_019438    | Ncapg              | -2.24382 | 1 | -2.73164 | 6.48306  | 0.912433  | Down |
| NM_013605    | Muc1               | -2.24367 | 1 | -3.57265 | 3.18062  | 0.224849  | Down |
| NM_001033244 | Fancd2             | -2.23598 | 1 | -3.25538 | 1.79335  | 0.165209  | Down |
| NM_001001450 | Ssxb2              | -2.23535 | 1 | -3.94504 | 3.67595  | 0.154555  | Down |
| NM_001080815 | Gipr               | -2.23535 | 1 | -3.94504 | 1.90567  | 0.0801239 | Down |
| NM_175226    | Rnf139             | -2.2346  | 1 | -2.35229 | 82.8846  | 15.438    | Down |
| NM_001080818 | Cdc14a             | -2.22981 | 1 | -2.49912 | 16.1451  | 2.70517   | Down |
| NM_181682    | Dsg1b              | -2.22762 | 1 | -3.03589 | 2.88681  | 0.316353  | Down |
| NM_178309    | Brip1              | -2.22619 | 1 | -3.06672 | 1.35707  | 0.14497   | Down |
| NM_001164727 | Gm10406            | -2.22266 | 1 | -2.84697 | 7.73574  | 0.991487  | Down |
| NM_172616    | C330027C09Rik      | -2.22211 | 1 | -2.80175 | 4.34923  | 0.578085  | Down |
| NM_009553    | Zscan2             | -2.22095 | 1 | -2.66841 | 12.1338  | 1.79006   | Down |
| NM_001029930 | ENSMUSG00000068790 | -2.21963 | 1 | -2.86519 | 7.83326  | 0.988856  | Down |
| NM_146254    | Wdr78              | -2.21836 | 1 | -2.49659 | 17.8229  | 2.9905    | Down |
| NM_001177776 | Ahi1               | -2.21741 | 1 | -2.64185 | 14.7609  | 2.22177   | Down |
| NM_001168246 | Syce2              | -2.2172  | 1 | -2.62723 | 35.034   | 5.33216   | Down |
| NM_027667    | Arhgap19           | -2.21604 | 1 | -2.44    | 19.891   | 3.47781   | Down |
| NM_001001490 | Oxgr1              | -2.21148 | 1 | -5.05607 | 0.653605 | 0         | Down |
| NM_001177564 | Gm4027             | -2.21148 | 1 | -5.05607 | 2.44414  | 0         | Down |
| NM_001177832 | Gm10324            | -2.21148 | 1 | -5.05607 | 1.27044  | 0         | Down |
| NM_020513    | Olfrl508           | -2.21148 | 1 | -5.05607 | 1.30791  | 0         | Down |
| NR_030151    | Mir468             | -2.21148 | 1 | -5.05607 | 31.2725  | 0         | Down |
| NR_038020    | LOC100504235       | -2.21148 | 1 | -4.05607 | 0.717216 | 0.0211088 | Down |
| NM_207204    | Ninl               | -2.21109 | 1 | -2.52441 | 10.5504  | 1.73381   | Down |
| NM_178936    | Tmem56             | -2.20906 | 1 | -2.44426 | 14.8974  | 2.59611   | Down |
| NM_146183    | Zfp428             | -2.20628 | 1 | -3.01543 | 8.31529  | 0.924347  | Down |
| NM_001145875 | 9530008L14Rik      | -2.20562 | 1 | -3.09002 | 3.54136  | 0.370497  | Down |
| NM_177006    | 3110047P20Rik      | -2.20413 | 1 | -3.91589 | 0.3919   | 0.0168208 | Down |

|              |               |          |   |          |          |           |      |
|--------------|---------------|----------|---|----------|----------|-----------|------|
| NR_027883    | 1700096J18Rik | -2.20413 | 1 | -3.91589 | 7.36842  | 0.31626   | Down |
| NM_013912    | Apln          | -2.20186 | 1 | -3.58658 | 1.99249  | 0.136832  | Down |
| NM_001113424 | Amn1          | -2.20035 | 1 | -2.54911 | 42.4808  | 6.85055   | Down |
| NM_012031    | Spag1         | -2.19856 | 1 | -2.70748 | 6.71165  | 0.958997  | Down |
| NM_001163464 | Abi3          | -2.19821 | 1 | -2.71255 | 5.74631  | 0.817798  | Down |
| NM_028516    | 1700056E22Rik | -2.1938  | 1 | -3.64103 | 5.7657   | 0.371205  | Down |
| NR_003650    | Gm5972        | -2.1933  | 1 | -2.54219 | 54.0034  | 8.75064   | Down |
| NM_021546    | Necab3        | -2.19203 | 1 | -2.90322 | 6.50724  | 0.79327   | Down |
| NM_177674    | 2010015L04Rik | -2.19169 | 1 | -2.84962 | 4.47845  | 0.570713  | Down |
| NM_029528    | Fam131b       | -2.19078 | 1 | -3.43458 | 1.97132  | 0.157552  | Down |
| NM_145223    | Alms1         | -2.18754 | 1 | -2.35191 | 18.3098  | 3.40835   | Down |
| NM_145496    | Dak           | -2.18751 | 1 | -2.48881 | 25.3008  | 4.26418   | Down |
| NR_027825    | 4930470P17Rik | -2.18491 | 1 | -3.79304 | 2.94759  | 0.154389  | Down |
| NM_011366    | Sorbs3        | -2.18409 | 1 | -2.53653 | 14.5413  | 2.36511   | Down |
| NR_038058    | C030037D09Rik | -2.1832  | 1 | -2.89471 | 11.0875  | 1.35968   | Down |
| NR_027984    | 2810025M15Rik | -2.1813  | 1 | -2.52714 | 36.7143  | 6.01264   | Down |
| NM_023431    | Mum1          | -2.17921 | 1 | -2.35798 | 41.587   | 7.70638   | Down |
| NM_001177964 | Dcdc2c        | -2.1792  | 1 | -2.92362 | 7.53306  | 0.901142  | Down |
| NM_027001    | 2610034M16Rik | -2.1777  | 1 | -3.4222  | 1.92015  | 0.154796  | Down |
| NR_033388    | Gm3002        | -2.1774  | 1 | -2.54074 | 7.64417  | 1.23896   | Down |
| NM_025806    | Plbd1         | -2.17719 | 1 | -2.57756 | 16.8407  | 2.65488   | Down |
| NM_080788    | Ttbk2         | -2.17685 | 1 | -2.30306 | 27.8746  | 5.37149   | Down |
| NM_010316    | Gng3          | -2.17317 | 1 | -2.61821 | 16.0388  | 2.45078   | Down |
| NM_026814    | Dysfp1        | -2.17185 | 1 | -3.6935  | 6.20492  | 0.370534  | Down |
| NM_178680    | Unc45b        | -2.17185 | 1 | -3.6935  | 1.35383  | 0.0808457 | Down |
| NM_001081314 | C2cd4b        | -2.16757 | 1 | -5.01543 | 1.78162  | 0         | Down |
| NM_001177966 | 4930480E11Rik | -2.16757 | 1 | -5.01543 | 1.82695  | 0         | Down |
| NM_011964    | Psg19         | -2.16757 | 1 | -5.01543 | 0.930334 | 0         | Down |
| NM_026263    | 4930519G04Rik | -2.16757 | 1 | -4.01543 | 1.16098  | 0.0351744 | Down |
| NM_029105    | 4930404A10Rik | -2.16757 | 1 | -5.01543 | 1.69496  | 0         | Down |
| NM_172801    | Otop2         | -2.16757 | 1 | -5.01543 | 1.0148   | 0         | Down |
| NM_199021    | Dpp10         | -2.16757 | 1 | -5.01543 | 0.511784 | 0         | Down |
| NR_015458    | 1700047M11Rik | -2.16757 | 1 | -4.01543 | 3.45417  | 0.104652  | Down |
| NR_029452    | 4932416H05Rik | -2.16606 | 1 | -2.63396 | 8.0042   | 1.20774   | Down |
| NM_001045514 | Akna          | -2.16478 | 1 | -2.5935  | 5.30812  | 0.826088  | Down |
| NM_172920    | Dpy19l1       | -2.16425 | 1 | -2.46077 | 12.2555  | 2.1066    | Down |
| NM_177307    | Cyp4f39       | -2.16173 | 1 | -2.92567 | 3.91324  | 0.466175  | Down |
| NM_030072    | Plb1          | -2.15899 | 1 | -3.76879 | 1.28446  | 0.0684375 | Down |
| NR_033455    | Gm10536       | -2.15899 | 1 | -3.76879 | 0.949094 | 0.0505689 | Down |
| NM_018743    | Agpat6        | -2.15828 | 1 | -2.26802 | 100.281  | 19.8044   | Down |
| NM_001037940 | Dnajb6        | -2.15575 | 1 | -2.43328 | 24.1918  | 4.24171   | Down |
| NR_015574    | 4930513N10Rik | -2.15409 | 1 | -2.83832 | 4.40087  | 0.563468  | Down |
| NM_080468    | Rxfp2         | -2.15201 | 1 | -3.48606 | 1.97419  | 0.148285  | Down |
| NM_019864    | Atr           | -2.15054 | 1 | -2.29054 | 30.2889  | 5.88626   | Down |
| NM_001081671 | 1700042B14Rik | -2.14971 | 1 | -3.67274 | 4.4878   | 0.271936  | Down |
| NM_001043322 | Fmn1          | -2.14772 | 1 | -2.50979 | 3.33809  | 0.552846  | Down |
| NM_133821    | Phlpp1        | -2.14655 | 1 | -2.44336 | 9.39667  | 1.63482   | Down |
| NM_001163691 | Cacna1h       | -2.14539 | 1 | -2.4152  | 8.40578  | 1.4929    | Down |
| NM_207232    | Ptpdc1        | -2.13962 | 1 | -2.2972  | 44.7807  | 8.65955   | Down |
| NM_172950    | Lpin1         | -2.13897 | 1 | -2.26302 | 56.1154  | 11.1183   | Down |
| NM_080457    | Muc4          | -2.13719 | 1 | -2.82201 | 1.08123  | 0.140018  | Down |
| NM_001009978 | Pde1a         | -2.13716 | 1 | -2.35277 | 65.1966  | 12.1136   | Down |
| NM_028039    | Esco2         | -2.13616 | 1 | -3.47111 | 2.28383  | 0.173348  | Down |
| NM_173386    | E330016A19Rik | -2.13411 | 1 | -3.08052 | 2.05594  | 0.215373  | Down |
| NM_198292    | Tex2          | -2.12929 | 1 | -2.24409 | 72.0621  | 14.4686   | Down |
| NM_024474    | Emid2         | -2.12723 | 1 | -3.65168 | 1.72622  | 0.10616   | Down |
| NM_145530    | Rhov          | -2.12723 | 1 | -3.65168 | 2.818    | 0.173303  | Down |
| NM_001045521 | Prss38        | -2.12228 | 1 | -4.97361 | 1.85623  | 0         | Down |
| NM_001162955 | Gpr15         | -2.12228 | 1 | -4.97361 | 1.78284  | 0         | Down |
| NM_007562    | Bnc1          | -2.12228 | 1 | -4.97361 | 0.493216 | 0         | Down |
| NM_016908    | Syt5          | -2.12228 | 1 | -4.97361 | 1.31421  | 0         | Down |
| NM_029070    | Cldn26        | -2.12228 | 1 | -4.97361 | 1.63575  | 0         | Down |
| NM_174993    | Fmr1nb        | -2.12228 | 1 | -4.97361 | 2.47298  | 0         | Down |
| NM_175017    | 4933427D06Rik | -2.12228 | 1 | -4.97361 | 0.877477 | 0         | Down |
| NR_033556    | A630010A05Rik | -2.12228 | 1 | -3.97361 | 1.41792  | 0.0442608 | Down |
| NM_001163521 | 1700034F02Rik | -2.12185 | 1 | -2.77067 | 6.18557  | 0.834003  | Down |
| NM_001163608 | Plxdc1        | -2.12137 | 1 | -2.53081 | 10.6279  | 1.7299    | Down |
| NM_145588    | Kif22         | -2.12004 | 1 | -2.84962 | 5.23372  | 0.660867  | Down |
| NM_029602    | Znrd1as       | -2.11671 | 1 | -2.44179 | 48.5782  | 8.45032   | Down |
| NM_001163551 | 4930432K09Rik | -2.11363 | 1 | -2.71331 | 11.5191  | 1.62546   | Down |
| NM_001024712 | Gm3696        | -2.11228 | 1 | -2.68743 | 7.68936  | 1.10757   | Down |
| NM_001177858 | Trim43c       | -2.10392 | 1 | -3.44073 | 3.25701  | 0.252531  | Down |
| NM_028180    | 1700030F18Rik | -2.09462 | 1 | -2.90851 | 14.4773  | 1.73408   | Down |
| NM_144553    | Dlgap5        | -2.0909  | 1 | -2.8216  | 3.574    | 0.460199  | Down |
| NM_030263    | Psd3          | -2.09019 | 1 | -2.33327 | 8.50732  | 1.60087   | Down |
| NM_198092    | Usp2          | -2.08891 | 1 | -2.33093 | 21.1764  | 3.99148   | Down |

|              |               |          |   |          |          |           |      |
|--------------|---------------|----------|---|----------|----------|-----------|------|
| NM_177706    | Gm4922        | -2.08527 | 1 | -2.77197 | 5.00132  | 0.670659  | Down |
| NM_001003920 | Brsk1         | -2.0833  | 1 | -3.37443 | 2.3262   | 0.191698  | Down |
| NM_008545    | Mageb3        | -2.08119 | 1 | -3.60861 | 1.95092  | 0.123671  | Down |
| NM_175554    | Clspn         | -2.08119 | 1 | -3.60861 | 0.909282 | 0.0576403 | Down |
| NM_001177580 | Gm13308       | -2.07976 | 1 | -2.82804 | 24.5279  | 3.1365    | Down |
| NM_001081370 | Shank2        | -2.07915 | 1 | -3.47111 | 0.978271 | 0.0728473 | Down |
| NM_175124    | Lrrc28        | -2.07833 | 1 | -2.33718 | 24.4449  | 4.58501   | Down |
| NM_027418    | Mapk6         | -2.07713 | 1 | -2.19982 | 74.1915  | 15.3587   | Down |
| NM_009862    | Cdc45         | -2.07602 | 1 | -2.54624 | 10.8621  | 1.74201   | Down |
| NM_001136080 | Sgca          | -2.07555 | 1 | -3.53    | 3.52033  | 0.24502   | Down |
| NM_001013760 | Gm4937        | -2.07554 | 1 | -4.93054 | 2.20809  | 0         | Down |
| NM_001081388 | Rimbp2        | -2.07554 | 1 | -4.93054 | 0.523024 | 0         | Down |
| NM_001081661 | 4930524E20Rik | -2.07554 | 1 | -4.93054 | 3.00158  | 0         | Down |
| NM_010759    | Mageb1        | -2.07554 | 1 | -3.93054 | 1.95116  | 0.0628092 | Down |
| NM_028790    | Acot12        | -2.07554 | 1 | -4.93054 | 0.731444 | 0         | Down |
| NM_031171_2  | Mageb2        | -2.07554 | 1 | -3.93054 | 2.2459   | 0.0722971 | Down |
| NM_080728    | Myh7          | -2.07554 | 1 | -4.93054 | 0.36838  | 0         | Down |
| NM_199257    | Tpte          | -2.07554 | 1 | -3.93054 | 0.874921 | 0.0281644 | Down |
| NM_001163833 | Msl3l2        | -2.07319 | 1 | -2.51383 | 12.2451  | 2.01283   | Down |
| NM_009863    | Cdc7          | -2.07284 | 1 | -2.78845 | 3.67301  | 0.485074  | Down |
| NM_001145832 | Kifc3         | -2.07147 | 1 | -2.42789 | 13.2862  | 2.33008   | Down |
| NM_001168240 | Irak1bp1      | -2.07007 | 1 | -2.5364  | 12.8934  | 2.08261   | Down |
| NM_018797    | Plxnc1        | -2.06903 | 1 | -2.58153 | 2.80988  | 0.438247  | Down |
| NM_001110159 | Nxt1          | -2.06434 | 1 | -2.39311 | 41.9454  | 7.5464    | Down |
| NM_010637    | Klf4          | -2.06371 | 1 | -2.40552 | 13.76    | 2.45278   | Down |
| NM_026298    | Ift172        | -2.06258 | 1 | -2.19338 | 49.0995  | 10.2084   | Down |
| NM_013456    | Actn3         | -2.06073 | 1 | -3.45383 | 2.00169  | 0.150874  | Down |
| NM_023232    | Diablo        | -2.06061 | 1 | -2.21265 | 102.005  | 20.919    | Down |
| NM_029264    | Tll10         | -2.06027 | 1 | -2.3077  | 33.4719  | 6.41046   | Down |
| NM_022019    | Dusp10        | -2.05822 | 1 | -2.70927 | 4.70273  | 0.66179   | Down |
| NM_007525    | Bard1         | -2.05655 | 1 | -2.82474 | 1.75256  | 0.224017  | Down |
| NM_010900    | Nfatc2ip      | -2.05635 | 1 | -2.54911 | 6.23287  | 0.99592   | Down |
| NM_028050    | 1600016N20Rik | -2.05574 | 1 | -2.33571 | 29.7225  | 5.57634   | Down |
| NM_001004182 | Gm5567        | -2.05486 | 1 | -3.51064 | 1.6454   | 0.116091  | Down |
| NM_153409    | Csrnp3        | -2.0536  | 1 | -2.76995 | 1.00569  | 0.134541  | Down |
| NR_003523    | H2afy3        | -2.05353 | 1 | -3.08254 | 3.97516  | 0.41324   | Down |
| NM_010327    | Gp1bb         | -2.05266 | 1 | -3.34558 | 3.69784  | 0.310952  | Down |
| NM_019703    | Pfkip         | -2.05148 | 1 | -2.28159 | 22.1528  | 4.32259   | Down |
| NM_001081117 | Mki67         | -2.05086 | 1 | -2.31079 | 6.93817  | 1.32537   | Down |
| NM_177195    | Atp8b5        | -2.05066 | 1 | -2.58658 | 4.03453  | 0.625804  | Down |
| NM_013460    | Adra1d        | -2.05038 | 1 | -3.6675  | 1.57202  | 0.0899636 | Down |
| NM_183262    | Stk35         | -2.0502  | 1 | -2.28755 | 13.4254  | 2.60826   | Down |
| NM_001172107 | Gramd1c       | -2.04955 | 1 | -2.30884 | 21.4227  | 4.09796   | Down |
| NM_001081429 | Ccdc15        | -2.04804 | 1 | -2.51496 | 6.58376  | 1.07941   | Down |
| NM_153777    | Lrrc56        | -2.04393 | 1 | -2.41988 | 16.1857  | 2.85151   | Down |
| NM_009174    | Siah2         | -2.04244 | 1 | -2.40302 | 15.0422  | 2.6835    | Down |
| NM_001033345 | Gm216         | -2.04    | 1 | -3.29214 | 3.48299  | 0.307529  | Down |
| NM_027485    | Med26         | -2.03909 | 1 | -2.38452 | 13.324   | 2.40957   | Down |
| NR_033120    | Klk1b7-ps     | -2.03706 | 1 | -3.76061 | 6.68928  | 0.320495  | Down |
| NM_029408    | Iqcd          | -2.03434 | 1 | -2.39876 | 21.8939  | 3.91665   | Down |
| NM_027513    | Nup205        | -2.0343  | 1 | -2.19301 | 28.7813  | 5.98258   | Down |
| NM_058214    | Recql4        | -2.0341  | 1 | -2.75122 | 2.701    | 0.366094  | Down |
| NM_145526    | P2rx3         | -2.03173 | 1 | -2.52518 | 4.95668  | 0.805293  | Down |
| NM_027246    | Snrpf         | -2.02936 | 1 | -2.47111 | 31.289   | 5.29823   | Down |
| NM_001029837 | Pik3cd        | -2.02926 | 1 | -2.40971 | 6.86391  | 1.21754   | Down |
| NM_001012726 | Aym1          | -2.02724 | 1 | -4.88615 | 4.09182  | 0         | Down |
| NM_001104619 | Vmn2r6        | -2.02724 | 1 | -4.88615 | 0.869759 | 0         | Down |
| NM_001190333 | Ccr6          | -2.02724 | 1 | -3.88615 | 1.38938  | 0.0461678 | Down |
| NM_018781    | Egr3          | -2.02724 | 1 | -3.88615 | 1.52576  | 0.0506998 | Down |
| NM_022031    | Hapln2        | -2.02724 | 1 | -3.88615 | 1.05133  | 0.0349348 | Down |
| NM_028708    | Jakmip3       | -2.02724 | 1 | -3.88615 | 0.419104 | 0.0139265 | Down |
| NM_031389    | Nlrp4c        | -2.02724 | 1 | -4.88615 | 0.597809 | 0         | Down |
| NM_146663    | Olfir733      | -2.02724 | 1 | -3.88615 | 2.17352  | 0.0722243 | Down |
| NM_153589    | Ano2          | -2.02724 | 1 | -4.88615 | 0.550161 | 0         | Down |
| NM_177834    | Cpa6          | -2.02724 | 1 | -4.88615 | 1.11942  | 0         | Down |
| NM_207546    | Vmn1r181      | -2.02724 | 1 | -4.88615 | 1.98574  | 0         | Down |
| NM_028484    | 1700037C18Rik | -2.02304 | 1 | -2.38958 | 32.7182  | 5.88987   | Down |
| NM_178898    | Zfp956        | -2.02251 | 1 | -2.28026 | 25.3268  | 4.94213   | Down |
| NM_001081037 | Srgap1        | -2.02224 | 1 | -2.71131 | 3.30705  | 0.462625  | Down |
| NM_001166164 | Ccdc74a       | -2.02055 | 1 | -2.75404 | 7.90726  | 1.06731   | Down |
| NM_001141932 | Rbms1         | -2.02004 | 1 | -2.31218 | 21.6232  | 4.1217    | Down |
| NM_001142937 | Moap1         | -2.01928 | 1 | -2.29262 | 16.936   | 3.27474   | Down |
| NM_026239    | Tmem35        | -2.01309 | 1 | -2.65482 | 6.64953  | 0.973183  | Down |
| NM_008234    | Hells         | -2.013   | 1 | -2.70243 | 3.71665  | 0.523154  | Down |
| NM_146171    | Ncapd2        | -2.01185 | 1 | -2.29597 | 12.7837  | 2.46513   | Down |
| NM_026316    | Aldh3b1       | -2.01171 | 1 | -2.53134 | 10.1953  | 1.64586   | Down |

|              |               |          |   |          |          |           |      |
|--------------|---------------|----------|---|----------|----------|-----------|------|
| NM_178118    | Dixdc1        | -2.01143 | 1 | -2.43477 | 4.76648  | 0.828792  | Down |
| NM_028059    | Zfp654        | -2.01046 | 1 | -2.14747 | 49.6296  | 10.6514   | Down |
| NM_001122873 | Ubl7          | -2.0068  | 1 | -2.36458 | 27.2845  | 5.0001    | Down |
| NM_001190984 | Lancl1        | -2.00576 | 1 | -2.15441 | 47.223   | 10.0842   | Down |
| NM_175173    | Wdr27         | -2.00371 | 1 | -2.6935  | 4.04163  | 0.572454  | Down |
| NM_007694    | Chgb          | -2.00265 | 1 | -3.34558 | 2.21855  | 0.183877  | Down |
| NM_015803    | Atp8a2        | -2.00101 | 1 | -2.36068 | 9.96694  | 1.8313    | Down |
| NM_001159527 | Wdr35         | -1.99997 | 1 | -2.26137 | 15.4127  | 3.04688   | Down |
| NM_001110322 | Cd72          | -1.99926 | 1 | -2.37216 | 25.9765  | 4.73168   | Down |
| NM_001166659 | Lekr1         | -1.99793 | 1 | -2.50213 | 8.89764  | 1.46778   | Down |
| NM_007456    | Ap1m1         | -1.997   | 1 | -2.29542 | 26.5429  | 5.11748   | Down |
| NM_001167763 | Ift122        | -1.99533 | 1 | -2.27717 | 14.285   | 2.79109   | Down |
| NM_001163233 | Fancg         | -1.99525 | 1 | -2.37647 | 12.1485  | 2.20527   | Down |
| NM_026319    | Ift74         | -1.99432 | 1 | -2.3345  | 19.22    | 3.59974   | Down |
| NM_019930    | Ranbp9        | -1.99431 | 1 | -2.14455 | 63.6426  | 13.6834   | Down |
| NM_025766    | Fam187a       | -1.99287 | 1 | -3.61407 | 2.31864  | 0.137795  | Down |
| NR_027969    | 4930441O14Rik | -1.99287 | 1 | -3.61407 | 1.24623  | 0.0740622 | Down |
| NM_001040435 | Tacc3         | -1.99237 | 1 | -2.4222  | 9.98268  | 1.75033   | Down |
| NM_016692    | Incenp        | -1.99144 | 1 | -2.48606 | 6.28255  | 1.04886   | Down |
| NM_172746    | Hirip3        | -1.98501 | 1 | -2.34151 | 14.7379  | 2.7447    | Down |
| NM_001081089 | Gpat2         | -1.98468 | 1 | -2.54911 | 6.0199   | 0.95612   | Down |
| NM_001001496 | Gja6          | -1.98447 | 1 | -3.51841 | 2.10772  | 0.142372  | Down |
| NM_001195727 | Gm5901        | -1.98243 | 1 | -2.56967 | 14.6759  | 2.29273   | Down |
| NM_008168    | Grik5         | -1.98086 | 1 | -2.47111 | 5.32049  | 0.897855  | Down |
| NM_001173460 | Sirpb1b       | -1.97978 | 1 | -3.11321 | 4.75179  | 0.479886  | Down |
| NM_001038710 | Tmod2         | -1.97855 | 1 | -2.27144 | 5.36907  | 1.05278   | Down |
| NM_001114678 | Gm5072        | -1.97726 | 1 | -4.84034 | 2.02009  | 0         | Down |
| NM_008782    | Pax5          | -1.97726 | 1 | -4.84034 | 1.73078  | 0         | Down |
| NM_009292    | Stra8         | -1.97726 | 1 | -4.84034 | 1.43697  | 0         | Down |
| NM_010024    | Dct           | -1.97726 | 1 | -4.84034 | 0.923901 | 0         | Down |
| NM_011648    | Tshr          | -1.97726 | 1 | -3.84034 | 0.484877 | 0.0166491 | Down |
| NM_029465    | Clec4g        | -1.97726 | 1 | -4.84034 | 1.69295  | 0         | Down |
| NM_144817    | Camk1g        | -1.97726 | 1 | -3.84034 | 0.852339 | 0.0292666 | Down |
| NM_175007    | Amph          | -1.97726 | 1 | -3.84034 | 0.654394 | 0.0224698 | Down |
| NM_175235    | Celf6         | -1.97726 | 1 | -4.84034 | 0.756162 | 0         | Down |
| NM_011517    | Sycp3         | -1.97558 | 1 | -2.3806  | 25.8398  | 4.67089   | Down |
| NM_015736    | Galnt3        | -1.97358 | 1 | -2.17524 | 29.5684  | 6.21643   | Down |
| NM_198111    | Akap6         | -1.9731  | 1 | -3.27081 | 0.631535 | 0.055961  | Down |
| NM_023635    | Rab27a        | -1.97183 | 1 | -2.61507 | 4.17548  | 0.628262  | Down |
| NM_009584    | Dnajc2        | -1.97176 | 1 | -2.16024 | 60.8659  | 12.9344   | Down |
| NM_010785    | Mdm1          | -1.97119 | 1 | -2.337   | 11.4296  | 2.13426   | Down |
| NM_001173459 | LOC100038947  | -1.96904 | 1 | -3.43047 | 3.90326  | 0.291359  | Down |
| NM_010258    | Gata6         | -1.96904 | 1 | -3.43047 | 1.50558  | 0.112384  | Down |
| NR_015535    | 4930567H12Rik | -1.96904 | 1 | -3.43047 | 5.03541  | 0.375869  | Down |
| NM_001039228 | Gm6583        | -1.9677  | 1 | -3.00162 | 3.21468  | 0.35365   | Down |
| NM_026103    | Vsig1         | -1.96737 | 1 | -2.34712 | 13.1131  | 2.42967   | Down |
| NM_019445    | Fmn2          | -1.96446 | 1 | -3.6935  | 0.44356  | 0.0222884 | Down |
| NM_145158    | Emilin2       | -1.9624  | 1 | -2.55857 | 3.61833  | 0.569187  | Down |
| NM_172275    | Trafd1        | -1.96113 | 1 | -2.13823 | 56.1994  | 12.1296   | Down |
| NM_178252    | Arhgap33      | -1.96107 | 1 | -2.48225 | 4.10611  | 0.685901  | Down |
| NM_001146023 | Fam98c        | -1.95521 | 1 | -2.25439 | 39.9265  | 7.9202    | Down |
| NM_146240    | Rassf9        | -1.95488 | 1 | -2.72745 | 4.21185  | 0.576226  | Down |
| NR_033541    | Gm10389       | -1.95335 | 1 | -2.67374 | 2.89382  | 0.414019  | Down |
| NM_026507    | Zwilch        | -1.95329 | 1 | -2.40754 | 8.31108  | 1.46986   | Down |
| NM_011889    | Sept3         | -1.95289 | 1 | -2.98768 | 1.50257  | 0.16692   | Down |
| NM_025651    | Aste1         | -1.952   | 1 | -2.31455 | 12.7842  | 2.42519   | Down |
| NM_007658    | Cdc25a        | -1.95144 | 1 | -2.38865 | 6.84055  | 1.2272    | Down |
| NM_011012    | Oprl1         | -1.94923 | 1 | -3.29554 | 1.97911  | 0.169891  | Down |
| NM_026056    | Cap2          | -1.94539 | 1 | -2.51841 | 4.11527  | 0.667275  | Down |
| NM_133923    | Till3         | -1.94537 | 1 | -2.43211 | 6.51482  | 1.13002   | Down |
| NM_001142939 | AKO10878      | -1.9453  | 1 | -2.20965 | 16.6282  | 3.40703   | Down |
| NM_001170975 | Dbndd1        | -1.94448 | 1 | -2.50324 | 10.308   | 1.69141   | Down |
| NR_030763    | Smok4a        | -1.94323 | 1 | -2.89995 | 3.12686  | 0.371653  | Down |
| NM_001081411 | Scft1         | -1.93678 | 1 | -2.09908 | 53.7928  | 11.9335   | Down |
| NM_019832    | Gkap1         | -1.93405 | 1 | -2.08031 | 130.846  | 29.4163   | Down |
| NM_001167914 | Atxn3         | -1.93386 | 1 | -2.19568 | 64.4068  | 13.3265   | Down |
| NM_016912    | Cdkl2         | -1.93336 | 1 | -2.14645 | 24.1813  | 5.1849    | Down |
| NM_025740    | Ccdc104       | -1.93232 | 1 | -2.07012 | 146.341  | 33.1379   | Down |
| NM_134041    | 4930427A07Rik | -1.93225 | 1 | -2.52123 | 4.23766  | 0.684743  | Down |
| NM_001145895 | 1700019G17Rik | -1.93137 | 1 | -2.49758 | 13.5188  | 2.22558   | Down |
| NM_146142    | Tdrd7         | -1.92828 | 1 | -2.10828 | 37.6858  | 8.30403   | Down |
| NM_001177714 | Gm2897        | -1.92721 | 1 | -2.43869 | 9.20143  | 1.58574   | Down |
| NM_011537    | Tbx5          | -1.92673 | 1 | -3.65873 | 0.707363 | 0.0364329 | Down |
| NM_080856    | Asb14         | -1.92673 | 1 | -3.65873 | 1.53593  | 0.0791085 | Down |
| NM_001081099 | 2610002D18Rik | -1.92552 | 1 | -3.79304 | 1.59141  | 0.0565283 | Down |
| NM_001081263 | Slc44a5       | -1.92552 | 1 | -4.79304 | 0.493431 | 0         | Down |

|              |               |          |   |          |          |                 |
|--------------|---------------|----------|---|----------|----------|-----------------|
| NM_001105181 | Vmn2r68-ps    | -1.92552 | 1 | -4.79304 | 0.790726 | 0 Down          |
| NM_011635    | Trap1a        | -1.92552 | 1 | -4.79304 | 1.72155  | 0 Down          |
| NM_032005    | Tbx19         | -1.92552 | 1 | -4.79304 | 0.759239 | 0 Down          |
| NM_198598    | Rhox11        | -1.92552 | 1 | -4.79304 | 2.51068  | 0 Down          |
| NM_025751    | 4933425L06Rik | -1.92487 | 1 | -3.32672 | 2.42326  | 0.199697 Down   |
| NM_177083    | B430306N03Rik | -1.92487 | 1 | -3.32672 | 1.50981  | 0.124421 Down   |
| NM_029338    | Rsph9         | -1.92373 | 1 | -2.27986 | 38.0278  | 7.39249 Down    |
| NM_029017    | Mrpl47        | -1.92268 | 1 | -2.30995 | 35.0862  | 6.66866 Down    |
| NM_021436    | Tmeff1        | -1.92189 | 1 | -2.57802 | 4.76606  | 0.734961 Down   |
| NM_172450    | 4930539E08Rik | -1.91956 | 1 | -3.17893 | 1.47153  | 0.140644 Down   |
| NM_001199151 | Sncap         | -1.91894 | 1 | -3.05607 | 1.88463  | 0.198099 Down   |
| NM_001198808 | Sfmbt2        | -1.91781 | 1 | -2.18262 | 8.01438  | 1.67319 Down    |
| NM_133350    | Mapre3        | -1.91522 | 1 | -2.378   | 11.4814  | 2.07162 Down    |
| NM_010480    | Hsp90aa1      | -1.91245 | 1 | -1.97563 | 358.197  | 86.6782 Down    |
| NM_022419    | Abhd8         | -1.91195 | 1 | -2.19874 | 26.9994  | 5.56968 Down    |
| NM_053074    | Nup62         | -1.90994 | 1 | -2.16086 | 28.9705  | 6.14319 Down    |
| NM_001048008 | Agtpbp1       | -1.90985 | 1 | -2.10216 | 39.6157  | 8.76403 Down    |
| NM_144849    | Ankrd54       | -1.90838 | 1 | -2.10097 | 61.1205  | 13.5325 Down    |
| NM_001165919 | 1700123I01Rik | -1.90746 | 1 | -3.44686 | 2.50601  | 0.178031 Down   |
| NM_013866    | Zfp385a       | -1.90729 | 1 | -2.682   | 3.77212  | 0.532713 Down   |
| NM_026916    | 4930579G22Rik | -1.90657 | 1 | -2.31332 | 44.0575  | 8.34513 Down    |
| NM_177887    | Tmem150b      | -1.90437 | 1 | -3.30761 | 1.82623  | 0.15253 Down    |
| NM_029339    | Ccdc101       | -1.90421 | 1 | -2.32452 | 22.2946  | 4.18678 Down    |
| NM_019706    | Rnf138        | -1.90285 | 1 | -2.10921 | 33.3607  | 7.34172 Down    |
| NM_026785    | Ube2c         | -1.9021  | 1 | -3.53    | 3.66805  | 0.231335 Down   |
| NM_176829    | 4931440F15Rik | -1.90074 | 1 | -2.33932 | 7.32265  | 1.35951 Down    |
| NM_019934    | Sec1          | -1.89855 | 1 | -2.36966 | 11.206   | 2.03254 Down    |
| NM_027590    | Ints10        | -1.89377 | 1 | -2.20369 | 18.9993  | 3.90233 Down    |
| NM_145121    | Cacnb1        | -1.89355 | 1 | -2.38184 | 9.81148  | 1.7624 Down     |
| NM_025924    | Upf3a         | -1.89325 | 1 | -2.26466 | 23.231   | 4.5606 Down     |
| NM_009832    | Ccnk          | -1.89285 | 1 | -2.1995  | 17.741   | 3.65501 Down    |
| NM_027950    | Osgin1        | -1.89229 | 1 | -2.36768 | 10.4841  | 1.90369 Down    |
| NM_001136069 | Ldha          | -1.89208 | 1 | -2.01127 | 159.342  | 37.5954 Down    |
| NM_001039472 | Kif21b        | -1.89094 | 1 | -2.34335 | 2.46856  | 0.456615 Down   |
| NM_146116    | Tubb2c        | -1.89025 | 1 | -1.96984 | 399.515  | 97.0524 Down    |
| NM_027985    | Mad2l2        | -1.88974 | 1 | -2.39225 | 15.1457  | 2.69803 Down    |
| NM_001164170 | Pias2         | -1.88953 | 1 | -2.10146 | 45.2053  | 10.0006 Down    |
| NM_025789    | Rsph3a        | -1.88913 | 1 | -2.04272 | 89.8541  | 20.7315 Down    |
| NM_053269    | Rad51c        | -1.8885  | 1 | -2.47111 | 4.78933  | 0.801998 Down   |
| NM_008350    | Ii11          | -1.88801 | 1 | -3.62311 | 1.39816  | 0.073859 Down   |
| NM_013582    | Lhcgr         | -1.88801 | 1 | -3.62311 | 1.06464  | 0.0562405 Down  |
| NM_178888    | Garnl3        | -1.88715 | 1 | -2.21545 | 12.0785  | 2.45874 Down    |
| NM_001081337 | Sipa1l2       | -1.88703 | 1 | -2.22078 | 6.23021  | 1.26325 Down    |
| NM_001001178 | Ccdc148       | -1.88511 | 1 | -2.43912 | 3.9469   | 0.677619 Down   |
| NM_018827    | Crif1         | -1.88244 | 1 | -2.70632 | 4.74217  | 0.654231 Down   |
| NM_001146049 | Htatip2       | -1.87881 | 1 | -2.60235 | 6.51736  | 0.980082 Down   |
| NM_145522    | Rabepk        | -1.87876 | 1 | -2.09862 | 50.3539  | 11.1592 Down    |
| NM_172930    | Fam70a        | -1.87713 | 1 | -2.32993 | 6.50766  | 1.21502 Down    |
| NM_001013826 | Dupd1         | -1.87184 | 1 | -4.74413 | 1.76918  | 0 Down          |
| NM_001195710 | Tmem95        | -1.87184 | 1 | -3.74413 | 3.67496  | 0.1352 Down     |
| NM_008693    | Klk1b3        | -1.87184 | 1 | -4.74413 | 2.19753  | 0 Down          |
| NM_017383    | Cntn6         | -1.87184 | 1 | -4.74413 | 0.545237 | 0 Down          |
| NM_021544    | Scn5a         | -1.87184 | 1 | -3.74413 | 0.230881 | 0.00849396 Down |
| NM_138678    | Butr1         | -1.87184 | 1 | -4.74413 | 1.89825  | 0 Down          |
| NM_177664    | D3Bwg0562e    | -1.87184 | 1 | -4.74413 | 0.342953 | 0 Down          |
| NR_015580    | Sox2ot        | -1.87184 | 1 | -4.74413 | 0.657038 | 0 Down          |
| NR_033216    | 1700069L16Rik | -1.87184 | 1 | -4.74413 | 2.77188  | 0 Down          |
| NR_033618    | 1700128F08Rik | -1.87184 | 1 | -4.74413 | 1.75802  | 0 Down          |
| NM_007693    | Chga          | -1.87052 | 1 | -3.50086 | 1.7775   | 0.114438 Down   |
| NR_028286    | 1700026D11Rik | -1.87052 | 1 | -3.50086 | 3.94954  | 0.254277 Down   |
| NM_001029876 | Urb2          | -1.86952 | 1 | -2.08533 | 15.6215  | 3.49442 Down    |
| NM_001010833 | Mdc1          | -1.86845 | 1 | -2.06342 | 14.9112  | 3.38839 Down    |
| NM_144939    | Frs3          | -1.86726 | 1 | -2.57646 | 4.60267  | 0.706141 Down   |
| NM_178595    | Pthr1         | -1.85808 | 1 | -2.63508 | 9.16008  | 1.33674 Down    |
| NM_008663    | Myo7a         | -1.855   | 1 | -2.07139 | 12.0905  | 2.73081 Down    |
| NM_148958    | Osbpl10       | -1.85179 | 1 | -2.30893 | 11.541   | 2.18594 Down    |
| NM_053068    | Chrac1        | -1.84996 | 1 | -2.12472 | 66.0076  | 14.3413 Down    |
| NM_029434    | Lca5          | -1.8486  | 1 | -2.50763 | 5.51302  | 0.892923 Down   |
| NM_019464    | Sh3glb1       | -1.84842 | 1 | -1.96717 | 72.0402  | 17.5251 Down    |
| NM_026403    | 2610027L16Rik | -1.84833 | 1 | -2.13456 | 13.5635  | 2.92565 Down    |
| NR_027879    | 4930583K01Rik | -1.84823 | 1 | -3.58658 | 2.99924  | 0.162607 Down   |
| NM_028805    | Katnb1        | -1.84621 | 1 | -2.2446  | 8.11897  | 1.61399 Down    |
| NM_183046    | Kif20b        | -1.84585 | 1 | -2.28275 | 4.20939  | 0.81302 Down    |
| NM_021714    | Wbp11         | -1.84449 | 1 | -2.02883 | 44.2942  | 10.3124 Down    |
| NM_134095    | Pppde2        | -1.84434 | 1 | -2.07477 | 26.9339  | 6.06684 Down    |
| NM_172941    | Zkscan17      | -1.84429 | 1 | -2.06624 | 20.7585  | 4.70471 Down    |

|                |               |          |   |          |          |           |      |
|----------------|---------------|----------|---|----------|----------|-----------|------|
| NM_009266      | Sephs2        | -1.84175 | 1 | -2.03442 | 50.7265  | 11.762    | Down |
| NM_198607      | 4930572J05Rik | -1.8396  | 1 | -2.38865 | 10.3041  | 1.83337   | Down |
| NM_016795      | Srpk1         | -1.83956 | 1 | -1.98213 | 80.712   | 19.4251   | Down |
| NM_001083945   | Rsph3b        | -1.83916 | 1 | -1.95818 | 174.621  | 42.7454   | Down |
| NM_030724      | Uck2          | -1.83907 | 1 | -2.18111 | 27.6162  | 5.75403   | Down |
| NM_001081347   | Rhobtb1       | -1.83332 | 1 | -2.25272 | 5.80506  | 1.14613   | Down |
| NM_001005508   | Arhgap30      | -1.83257 | 1 | -2.26985 | 5.17222  | 1.00799   | Down |
| NM_028935      | Zfp558        | -1.83013 | 1 | -2.27734 | 5.7911   | 1.12203   | Down |
| NM_011481      | Srms          | -1.82998 | 1 | -3.30118 | 1.72385  | 0.140932  | Down |
| NM_028813      | Vit           | -1.82816 | 1 | -2.39094 | 5.35508  | 0.950175  | Down |
| NM_001168501   | Zfp57         | -1.82217 | 1 | -2.56422 | 5.16998  | 0.796746  | Down |
| NM_027049      | 1700008O03Rik | -1.81939 | 1 | -3.22854 | 5.35511  | 0.472827  | Down |
| NM_028492      | Ccdc103       | -1.81725 | 1 | -2.44602 | 6.58211  | 1.11675   | Down |
| NM_010050      | Dio2          | -1.81635 | 1 | -3.17155 | 0.922847 | 0.0864208 | Down |
| NM_001033425   | Zscan10       | -1.81612 | 1 | -3.6935  | 0.695641 | 0.0265401 | Down |
| NM_001141983   | Golga7b       | -1.81612 | 1 | -4.6935  | 0.664445 | 0         | Down |
| NM_008497      | Lhb           | -1.81612 | 1 | -4.6935  | 3.69687  | 0         | Down |
| NM_010611      | Kcnq2         | -1.81612 | 1 | -4.6935  | 0.677605 | 0         | Down |
| NM_130880      | Otud7a        | -1.81612 | 1 | -3.6935  | 0.543689 | 0.0207428 | Down |
| NM_133204      | Zscan5b       | -1.81612 | 1 | -4.6935  | 0.955668 | 0         | Down |
| NM_029852      | Ccdc41        | -1.81127 | 1 | -2.06998 | 20.6558  | 4.66425   | Down |
| NM_001081336   | Dgkh          | -1.8086  | 1 | -2.05607 | 16.9006  | 3.85467   | Down |
| NM_001145360   | Gm9047        | -1.80733 | 1 | -3.54911 | 3.9917   | 0.222263  | Down |
| NM_011374      | St8sia1       | -1.80733 | 1 | -3.54911 | 0.286675 | 0.0159624 | Down |
| NM_026862      | Cd177         | -1.80733 | 1 | -3.54911 | 0.950125 | 0.0529042 | Down |
| NM_052823      | Fxyd2         | -1.80733 | 1 | -3.54911 | 4.08012  | 0.227187  | Down |
| NM_010119      | Ehd1          | -1.8055  | 1 | -1.99943 | 33.6199  | 7.9868    | Down |
| NM_009109      | Ryr1          | -1.80526 | 1 | -3.44073 | 0.208689 | 0.0140198 | Down |
| NM_001171024   | Nup62-il4i1   | -1.80371 | 1 | -2.37443 | 6.09056  | 1.09247   | Down |
| NM_001025605   | Gm527         | -1.80237 | 1 | -2.4222  | 8.2412   | 1.42306   | Down |
| NM_001114131   | Ppp4r1        | -1.80176 | 1 | -2.00953 | 24.6007  | 5.80148   | Down |
| NM_001163378   | 2700049A03Rik | -1.80115 | 1 | -2.0545  | 11.0773  | 2.52882   | Down |
| NM_145990      | Cdk5rap2      | -1.80058 | 1 | -1.95017 | 31.5067  | 7.75184   | Down |
| NM_026883      | 1500011H22Rik | -1.80005 | 1 | -2.03925 | 72.458   | 16.7244   | Down |
| NM_001033259   | Ccdc109a      | -1.79969 | 1 | -2.40185 | 8.91364  | 1.56396   | Down |
| NM_001099637   | Cep170        | -1.79964 | 1 | -1.99234 | 15.5778  | 3.71904   | Down |
| NM_026502      | 1110004E09Rik | -1.79848 | 1 | -2.03145 | 64.3596  | 14.9384   | Down |
| NM_007389      | Chrna1        | -1.79796 | 1 | -3.34558 | 0.877663 | 0.0669692 | Down |
| NM_001034059   | Ccdc160       | -1.7958  | 1 | -2.84034 | 4.17432  | 0.514128  | Down |
| NM_212446      | Psmf1         | -1.79106 | 1 | -1.95824 | 39.9426  | 9.76941   | Down |
| NR_026907      | Wbscr25       | -1.79042 | 1 | -1.96273 | 64.2854  | 16.7229   | Down |
| NM_177922      | Mapk15        | -1.78968 | 1 | -2.65168 | 3.64714  | 0.520764  | Down |
| NM_178375      | Zswim3        | -1.78879 | 1 | -2.21225 | 8.94164  | 1.81547   | Down |
| NM_001042623   | Phc1          | -1.78855 | 1 | -2.01941 | 20.5692  | 4.81465   | Down |
| NM_008153      | Cmklr1        | -1.78826 | 1 | -2.39955 | 4.31141  | 0.757023  | Down |
| NM_001081072   | Slc27a6       | -1.78821 | 1 | -3.05607 | 2.38748  | 0.248699  | Down |
| NM_028759      | Dcaf6         | -1.78519 | 1 | -1.9298  | 56.5767  | 14.1193   | Down |
| NM_009878      | Cdkn2d        | -1.78464 | 1 | -2.23664 | 16.7373  | 3.33517   | Down |
| NM_177449      | Lrrc29        | -1.78272 | 1 | -2.15112 | 16.1638  | 3.43462   | Down |
| NM_175389      | Rg9mtd2       | -1.78251 | 1 | -2.1586  | 7.59997  | 1.6059    | Down |
| NM_001042699   | 4831426119Rik | -1.77818 | 1 | -2.30537 | 2.93592  | 0.554676  | Down |
| NM_029295      | Cklf          | -1.77533 | 1 | -2.2502  | 31.0869  | 6.12709   | Down |
| NM_026050      | 2810453I06Rik | -1.77361 | 1 | -2.00294 | 32.6489  | 7.73039   | Down |
| NM_016846      | Rgl1          | -1.77211 | 1 | -2.04094 | 14.4334  | 3.32451   | Down |
| NM_010116      | Klk1b9        | -1.77148 | 1 | -3.40971 | 3.60481  | 0.247555  | Down |
| NM_029354      | Mzt2          | -1.77128 | 1 | -2.0982  | 38.2966  | 8.45854   | Down |
| NM_008014      | Ppm1g         | -1.77122 | 1 | -1.90483 | 100.017  | 25.4004   | Down |
| NM_027918      | 1300017J02Rik | -1.77092 | 1 | -3.03995 | 2.69581  | 0.284008  | Down |
| NM_023579      | Ipo5          | -1.76672 | 1 | -1.89523 | 50.741   | 12.9733   | Down |
| NM_001111078   | Uhrf1         | -1.76454 | 1 | -2.13913 | 8.70653  | 1.86497   | Down |
| NM_175307      | Fam46b        | -1.76322 | 1 | -2.31499 | 6.36618  | 1.19233   | Down |
| NM_010598      | Kcnab2        | -1.76318 | 1 | -2.56687 | 2.13225  | 0.325398  | Down |
| NM_001145779   | Kif2a         | -1.76316 | 1 | -1.97801 | 23.1183  | 5.57149   | Down |
| NM_001166406   | Kif20a        | -1.76047 | 1 | -2.07431 | 11.6058  | 2.60766   | Down |
| NM_053208      | Egln2         | -1.75973 | 1 | -1.90075 | 91.9206  | 23.4079   | Down |
| NM_001033372   | Gm648         | -1.75818 | 1 | -4.64103 | 1.74232  | 0         | Down |
| NM_001168274   | Gsdmc2        | -1.75818 | 1 | -4.64103 | 0.783744 | 0         | Down |
| NM_007733      | Col19a1       | -1.75818 | 1 | -3.64103 | 0.171885 | 0.00681   | Down |
| NM_028066      | F11           | -1.75818 | 1 | -4.64103 | 0.807494 | 0         | Down |
| NM_146335      | Olfir19       | -1.75818 | 1 | -3.64103 | 1.9484   | 0.0771946 | Down |
| NR_027507      | Tspy-ps       | -1.75818 | 1 | -3.64103 | 5.64491  | 0.223648  | Down |
| NR_036631      | Zim3          | -1.75818 | 1 | -4.64103 | 0.56204  | 0         | Down |
| NM_015771      | Lats2         | -1.75724 | 1 | -2.04973 | 9.12949  | 2.08831   | Down |
| NM_008230      | Hdc           | -1.75556 | 1 | -2.40738 | 4.51334  | 0.784931  | Down |
| NM_173068      | Syt7          | -1.75547 | 1 | -2.66375 | 0.968807 | 0.136565  | Down |
| NM_001199961_2 | Ccl27b        | -1.75542 | 1 | -2.23504 | 29.2471  | 5.82392   | Down |

|                |               |          |   |          |          |           |      |
|----------------|---------------|----------|---|----------|----------|-----------|------|
| NM_001199962_2 | Gm13306       | -1.75542 | 1 | -2.23504 | 29.2471  | 5.82392   | Down |
| NM_001199964_2 | Gm2506        | -1.75542 | 1 | -2.23504 | 29.2471  | 5.82392   | Down |
| NM_172749      | Zfp646        | -1.75532 | 1 | -1.88116 | 38.2483  | 9.87553   | Down |
| NM_178278      | Caps2         | -1.75221 | 1 | -3.16625 | 1.69182  | 0.156067  | Down |
| NR_030773      | Zfp821        | -1.74825 | 1 | -2.09859 | 16.5134  | 3.6426    | Down |
| NM_133700      | Btbd10        | -1.74436 | 1 | -1.93887 | 40.1353  | 9.94374   | Down |
| NM_175535      | Arhgap20      | -1.74259 | 1 | -2.05021 | 6.71304  | 1.53419   | Down |
| NM_001174155   | Rasgrp4       | -1.74225 | 1 | -2.07377 | 8.00791  | 1.79865   | Down |
| NM_027664      | Rimklb        | -1.74187 | 1 | -1.94987 | 22.4676  | 5.52238   | Down |
| NM_025768      | Grtp1         | -1.7416  | 1 | -2.08896 | 25.9087  | 5.75424   | Down |
| NM_001159369   | Polc          | -1.73884 | 1 | -2.25133 | 2.13189  | 0.418742  | Down |
| NM_199306      | Wdtdc1        | -1.73817 | 1 | -1.94183 | 22.4687  | 5.55413   | Down |
| NM_023247      | Ndufaf3       | -1.7375  | 1 | -1.94027 | 88.6348  | 21.9343   | Down |
| NM_176844      | Chrna5        | -1.73692 | 1 | -3.378   | 1.11997  | 0.0786607 | Down |
| NM_010443      | Hmox2         | -1.73275 | 1 | -1.88492 | 131.112  | 33.7503   | Down |
| NM_011755      | Zfp35         | -1.73031 | 1 | -1.97915 | 20.9561  | 5.0417    | Down |
| NM_001195034   | Acpt          | -1.72927 | 1 | -3.20807 | 3.21744  | 0.280872  | Down |
| NM_025351      | Chchd6        | -1.72898 | 1 | -2.00225 | 47.1634  | 11.1576   | Down |
| NM_027354      | Poc1a         | -1.72787 | 1 | -2.77692 | 3.59284  | 0.462625  | Down |
| NM_144843      | Mtmr6         | -1.72473 | 1 | -1.88284 | 39.882   | 10.2801   | Down |
| NM_145076      | Trim24        | -1.724   | 1 | -1.93594 | 21.3656  | 5.30203   | Down |
| NM_182993      | Slc17a7       | -1.72386 | 1 | -3.03815 | 1.8727   | 0.19535   | Down |
| NM_001014900   | Zmynd12       | -1.72334 | 1 | -2.6935  | 4.16768  | 0.57242   | Down |
| NM_001162532   | Fam174b       | -1.72095 | 1 | -2.38538 | 3.79954  | 0.670192  | Down |
| NM_177052      | Kif6          | -1.72069 | 1 | -2.5266  | 2.07419  | 0.325583  | Down |
| NM_009359      | Tex9          | -1.72045 | 1 | -2.10854 | 21.5756  | 4.71785   | Down |
| NM_008568      | Mcm7          | -1.71976 | 1 | -2.00095 | 20.8846  | 4.94387   | Down |
| NM_008012      | Akr1b8        | -1.71928 | 1 | -2.48371 | 6.09279  | 0.99098   | Down |
| NM_178630      | Agbl3         | -1.71737 | 1 | -2.0717  | 8.67648  | 1.94969   | Down |
| NM_001033220   | AU021092      | -1.71209 | 1 | -2.30936 | 8.9402   | 1.67443   | Down |
| NM_178378      | lqcg          | -1.71167 | 1 | -1.9284  | 20.3697  | 5.08081   | Down |
| NM_198630      | 1810024B03Rik | -1.71006 | 1 | -3.26466 | 2.80754  | 0.226828  | Down |
| NM_057171      | Bag6          | -1.70908 | 1 | -1.90819 | 26.0127  | 6.58278   | Down |
| NM_028534      | Smap1         | -1.7082  | 1 | -1.89341 | 49.0843  | 12.5531   | Down |
| NM_001199736   | Gm9524        | -1.70781 | 1 | -2.12259 | 4.81076  | 1.04024   | Down |
| NM_029497      | Urb1          | -1.70734 | 1 | -1.91458 | 12.1123  | 3.05099   | Down |
| NM_001033290   | Gpr55         | -1.70628 | 1 | -2.67756 | 2.43242  | 0.33784   | Down |
| NM_001014394   | Gpr113        | -1.70625 | 1 | -2.51293 | 2.33884  | 0.370654  | Down |
| NM_001097644   | Ccny1         | -1.70466 | 1 | -1.97549 | 18.2274  | 4.39336   | Down |
| NM_177607      | 4933430I17Rik | -1.7043  | 1 | -3.02    | 3.04882  | 0.322113  | Down |
| NM_001164614   | Ccdc159       | -1.70358 | 1 | -2.30118 | 7.89402  | 1.48693   | Down |
| NM_025717      | Rbm4b         | -1.70177 | 1 | -1.88103 | 64.3583  | 16.6034   | Down |
| NM_133778      | Fam131a       | -1.70081 | 1 | -2.16259 | 8.5927   | 1.80189   | Down |
| NM_010322      | Gnpat         | -1.69957 | 1 | -1.90661 | 29.825   | 7.55441   | Down |
| NM_007957      | Esx1          | -1.69784 | 1 | -4.58658 | 1.08895  | 0         | Down |
| NM_019538      | Plac1         | -1.69784 | 1 | -4.58658 | 1.62834  | 0         | Down |
| NM_145493      | Cplx4         | -1.69784 | 1 | -4.58658 | 0.992212 | 0         | Down |
| NM_173779      | Ankrd58       | -1.69784 | 1 | -4.58658 | 1.10694  | 0         | Down |
| NM_021504      | Ngly1         | -1.69711 | 1 | -1.90579 | 30.1738  | 7.64682   | Down |
| NM_001033155   | Dnajb14       | -1.6955  | 1 | -2.00741 | 21.9132  | 5.1584    | Down |
| NM_138586      | Exosc5        | -1.69452 | 1 | -2.05445 | 30.0133  | 6.82397   | Down |
| NM_019691      | Gria4         | -1.69264 | 1 | -2.4584  | 1.43301  | 0.237238  | Down |
| NM_028947      | Arl13a        | -1.69264 | 1 | -2.4584  | 4.48083  | 0.741813  | Down |
| NM_001102615   | Kif19a        | -1.6919  | 1 | -3.05607 | 1.44136  | 0.146384  | Down |
| NM_177322      | Agtr1a        | -1.69166 | 1 | -2.49912 | 3.1429   | 0.502914  | Down |
| NM_134033      | Ccdc117       | -1.68954 | 1 | -1.90031 | 25.1436  | 6.39596   | Down |
| NM_177710      | Ssh2          | -1.68695 | 1 | -1.88308 | 22.4651  | 5.78535   | Down |
| NM_015755      | Hunk          | -1.68242 | 1 | -2.1687  | 3.50621  | 0.730952  | Down |
| NM_008052      | Dtx1          | -1.68085 | 1 | -2.5155  | 1.83847  | 0.289869  | Down |
| NM_011485      | Star          | -1.67875 | 1 | -1.97474 | 11.0792  | 2.66954   | Down |
| NM_008727      | Npr1          | -1.67837 | 1 | -2.06547 | 6.58354  | 1.4835    | Down |
| NM_001013774   | Kpna7         | -1.67722 | 1 | -3.43047 | 1.05407  | 0.063871  | Down |
| NM_001105561   | Gm11545       | -1.67722 | 1 | -3.43047 | 0.879896 | 0.0533167 | Down |
| NM_153572      | Katnal1       | -1.67666 | 1 | -1.91899 | 10.5496  | 2.64683   | Down |
| NM_001199265   | Epb4.1l2      | -1.6759  | 1 | -1.87272 | 22.0768  | 5.72626   | Down |
| NM_134092      | Mtbp          | -1.67557 | 1 | -2.26629 | 3.90139  | 0.753531  | Down |
| NM_009881      | Cdyl          | -1.67502 | 1 | -1.85504 | 33.4291  | 8.78094   | Down |
| NM_029122      | lqca          | -1.67284 | 1 | -2.1777  | 5.08042  | 1.05115   | Down |
| NM_011506      | Sucla2        | -1.67122 | 1 | -1.84615 | 57.5926  | 15.2232   | Down |
| NM_008258      | Hn1           | -1.67092 | 1 | -1.84662 | 88.6301  | 23.4193   | Down |
| NM_029749      | Usp42         | -1.66946 | 1 | -1.88022 | 16.4286  | 4.23776   | Down |
| NM_007976      | F5            | -1.66939 | 1 | -2.30429 | 1.44919  | 0.271421  | Down |
| NM_025275      | Amz2          | -1.66908 | 1 | -1.86387 | 34.9702  | 9.12684   | Down |
| NM_153129      | Pacs1         | -1.66814 | 1 | -1.89288 | 17.2065  | 4.39807   | Down |
| NR_028360      | 1700018L02Rik | -1.66672 | 1 | -2.29214 | 8.83038  | 1.66956   | Down |
| NM_198108      | Morn4         | -1.66533 | 1 | -1.96545 | 23.6403  | 5.73221   | Down |



|              |               |          |   |          |          |           |      |
|--------------|---------------|----------|---|----------|----------|-----------|------|
| NM_021488    | Ghrl          | -1.66532 | 1 | -2.50086 | 12.8277  | 2.04339   | Down |
| NM_172708    | Dok7          | -1.6652  | 1 | -3.31241 | 1.17886  | 0.086739  | Down |
| NM_173447    | Ephb1         | -1.6652  | 1 | -3.31241 | 0.627192 | 0.046148  | Down |
| NR_033117_2  | Gm3020        | -1.66456 | 1 | -2.53384 | 7.64321  | 1.18523   | Down |
| NM_011132    | Pole          | -1.66418 | 1 | -2.04341 | 3.87129  | 0.886184  | Down |
| NM_012046    | Spo11         | -1.66416 | 1 | -2.20119 | 8.44763  | 1.71529   | Down |
| NM_011766    | Zfpm2         | -1.66203 | 1 | -2.47111 | 1.41516  | 0.230932  | Down |
| NM_029881    | Tmem200a      | -1.66203 | 1 | -2.47111 | 1.71057  | 0.279139  | Down |
| NM_178608    | Reep1         | -1.65979 | 1 | -1.94468 | 12.438   | 3.06137   | Down |
| NM_011241    | Rangap1       | -1.65796 | 1 | -1.81099 | 52.0724  | 14.1095   | Down |
| NM_033217    | Ngfr          | -1.65707 | 1 | -2.44414 | 2.15165  | 0.358849  | Down |
| NM_009765    | Brca2         | -1.65613 | 1 | -1.89532 | 6.24856  | 1.59384   | Down |
| NM_024241    | Kif24         | -1.65506 | 1 | -2.04281 | 4.70595  | 1.07725   | Down |
| NM_009544    | Zfp105        | -1.65172 | 1 | -1.97634 | 18.3274  | 4.40633   | Down |
| NM_175646    | Txnl4b        | -1.65103 | 1 | -1.99168 | 18.665   | 4.43697   | Down |
| NM_008247    | Ppap2a        | -1.65014 | 1 | -2.02581 | 20.1425  | 4.66849   | Down |
| NM_016811    | Dgka          | -1.6498  | 1 | -1.86826 | 27.7731  | 7.22248   | Down |
| NM_009156    | Sepw1         | -1.64834 | 1 | -1.93431 | 66.1342  | 16.3948   | Down |
| NM_007671    | Cdkn2c        | -1.64779 | 1 | -1.98156 | 31.4437  | 7.52961   | Down |
| NM_007997    | Fdxr          | -1.64524 | 1 | -2.20807 | 7.05893  | 1.42351   | Down |
| NM_026714    | Ccdc163       | -1.64524 | 1 | -2.20807 | 10.8501  | 2.18803   | Down |
| NM_001205362 | Dcun1d1       | -1.64469 | 1 | -1.80666 | 31.3414  | 8.51648   | Down |
| NM_144527    | Ccdc21        | -1.64431 | 1 | -1.81503 | 32.4489  | 8.76496   | Down |
| NM_145475    | Cerk          | -1.64425 | 1 | -1.88615 | 14.0888  | 3.6164    | Down |
| NM_009764    | Brca1         | -1.6433  | 1 | -1.99628 | 4.69652  | 1.11228   | Down |
| NM_025386    | Fbxo36        | -1.64062 | 1 | -1.99208 | 34.9239  | 8.29585   | Down |
| NM_001025391 | Sufu          | -1.64049 | 1 | -2.12822 | 7.24736  | 1.55405   | Down |
| NM_010215    | Il4i1         | -1.64001 | 1 | -2.22447 | 5.99216  | 1.19242   | Down |
| NM_011693    | Vcam1         | -1.63998 | 1 | -1.95097 | 11.6497  | 2.8522    | Down |
| NM_001109747 | Cenpw         | -1.6399  | 1 | -2.27609 | 6.96008  | 1.32946   | Down |
| NR_003640    | 1700045I19Rik | -1.63921 | 1 | -2.3191  | 7.84778  | 1.44789   | Down |
| NM_011447    | Sox8          | -1.63822 | 1 | -2.6935  | 1.92881  | 0.263321  | Down |
| NM_198304    | Nup188        | -1.63633 | 1 | -1.96384 | 6.31784  | 1.53205   | Down |
| NM_001004193 | Rhox8         | -1.63487 | 1 | -4.53    | 1.38692  | 0         | Down |
| NM_001008424 | Cdsn          | -1.63487 | 1 | -4.53    | 0.624582 | 0         | Down |
| NM_001104573 | Vmn2r111      | -1.63487 | 1 | -4.53    | 0.649818 | 0         | Down |
| NM_001164171 | Myh6          | -1.63487 | 1 | -4.53    | 0.275149 | 0         | Down |
| NM_001191032 | Cypt14        | -1.63487 | 1 | -3.53    | 3.29258  | 0.141321  | Down |
| NM_029142    | 4930502E18Rik | -1.63487 | 1 | -4.53    | 1.39038  | 0         | Down |
| NM_029170    | 4930519F16Rik | -1.63487 | 1 | -3.53    | 1.4345   | 0.0615703 | Down |
| NM_146377    | Olf127        | -1.63487 | 1 | -4.53    | 1.72081  | 0         | Down |
| NR_028259    | 4932414J04Rik | -1.63487 | 1 | -4.53    | 0.546433 | 0         | Down |
| NM_026348    | Itgb3bp       | -1.63287 | 1 | -2.0052  | 10.2579  | 2.41226   | Down |
| NM_001127188 | Zfp534        | -1.63284 | 1 | -3.05607 | 1.49825  | 0.149357  | Down |
| NM_028713    | Rftn2         | -1.63246 | 1 | -2.22495 | 3.24197  | 0.644478  | Down |
| NM_020022    | Rfc2          | -1.6324  | 1 | -1.91379 | 31.4031  | 7.89795   | Down |
| NM_009626    | Adh7          | -1.63112 | 1 | -3.38865 | 1.10624  | 0.069063  | Down |
| NM_027116    | Nkpd1         | -1.63112 | 1 | -3.38865 | 0.835404 | 0.0521547 | Down |
| NM_177656    | 6820408C15Rik | -1.63078 | 1 | -2.32355 | 5.34506  | 0.981684  | Down |
| NM_026643    | Cep5711       | -1.63009 | 1 | -1.93297 | 19.5919  | 4.85855   | Down |
| NM_001033966 | Ak2           | -1.62829 | 1 | -2.11644 | 17.9781  | 3.88677   | Down |
| NM_153508    | Clstn3        | -1.62796 | 1 | -3.27846 | 0.713105 | 0.0537492 | Down |
| NM_013900    | Mfi2          | -1.62466 | 1 | -2.90407 | 1.34933  | 0.156369  | Down |
| NM_001098789 | Ndufa4I2      | -1.62335 | 1 | -2.94504 | 5.361    | 0.597014  | Down |
| NM_053178    | Acsbg1        | -1.62291 | 1 | -1.80449 | 39.6559  | 10.788    | Down |
| NM_008053    | Fxr1          | -1.62204 | 1 | -1.76362 | 86.399   | 24.1969   | Down |
| NM_177697    | Vwa3a         | -1.6215  | 1 | -2.26861 | 2.20933  | 0.423777  | Down |
| NM_026542    | Slc25a39      | -1.62142 | 1 | -1.75142 | 126.764  | 35.8091   | Down |
| NR_033307    | 4930592I03Rik | -1.6199  | 1 | -2.25698 | 10.521   | 2.03662   | Down |
| NM_026088    | 1700022I11Rik | -1.61908 | 1 | -2.31241 | 2.39418  | 0.443154  | Down |
| NM_008715    | Ints6         | -1.61883 | 1 | -1.77504 | 29.4399  | 8.17799   | Down |
| NM_198612    | Gxylt2        | -1.61783 | 1 | -2.5951  | 3.20603  | 0.471792  | Down |
| NM_026665    | Cep57         | -1.6168  | 1 | -1.78252 | 51.7806  | 14.3071   | Down |
| NM_027318    | Znhit1        | -1.61639 | 1 | -1.88615 | 49.636   | 12.7304   | Down |
| NM_176841    | Ccdc88a       | -1.61562 | 1 | -1.80445 | 10.9709  | 2.98419   | Down |
| NR_015459    | 4933431E20Rik | -1.61507 | 1 | -1.76785 | 28.3438  | 7.91334   | Down |
| NM_001081218 | Hcfc2         | -1.6134  | 1 | -1.93291 | 15.5392  | 3.85132   | Down |
| NM_025954    | Pgp           | -1.61314 | 1 | -1.80225 | 98.0563  | 26.7129   | Down |
| NM_011603    | Tbpl1         | -1.60628 | 1 | -1.75781 | 53.912   | 15.1573   | Down |
| NM_001033785 | Akap14        | -1.6053  | 1 | -2.88615 | 3.0724   | 0.360557  | Down |
| NM_028533    | 1700065D16Rik | -1.6053  | 1 | -2.88615 | 1.98692  | 0.233172  | Down |
| NM_027722    | Nudt4         | -1.60395 | 1 | -1.68676 | 156.577  | 46.2831   | Down |
| NM_025723    | 4921515J06Rik | -1.60276 | 1 | -2.33932 | 3.78694  | 0.684375  | Down |
| NM_026486    | Tctn2         | -1.60168 | 1 | -2.10433 | 5.98347  | 1.30332   | Down |
| NM_024472    | Gltpd1        | -1.60007 | 1 | -1.83325 | 25.212   | 6.71523   | Down |
| NM_198611    | B3gnt4        | -1.59684 | 1 | -2.17565 | 8.57081  | 1.76577   | Down |

|              |               |          |   |          |          |            |      |
|--------------|---------------|----------|---|----------|----------|------------|------|
| NM_024432    | Ubxn6         | -1.59536 | 1 | -1.73049 | 113.246  | 32.4558    | Down |
| NM_025421    | Acyp1         | -1.59398 | 1 | -1.80662 | 123.253  | 33.4581    | Down |
| NM_138581    | 1700088E04Rik | -1.59261 | 1 | -1.92119 | 27.7548  | 6.93273    | Down |
| NM_001008231 | Daam2         | -1.59238 | 1 | -1.86769 | 8.04726  | 2.09019    | Down |
| NM_177367    | Gemin4        | -1.59208 | 1 | -1.84872 | 16.1296  | 4.24749    | Down |
| NM_133777    | Ube2s         | -1.59055 | 1 | -1.76432 | 119.212  | 33.3523    | Down |
| NM_001163729 | Klhdc3        | -1.58945 | 1 | -1.79854 | 41.738   | 11.3948    | Down |
| NM_020032    | Poll          | -1.58868 | 1 | -1.88858 | 17.6695  | 4.5196     | Down |
| NM_026509    | Murc          | -1.58392 | 1 | -3.14918 | 1.60253  | 0.140491   | Down |
| NM_028897    | Mei1          | -1.58353 | 1 | -3.34558 | 0.558801 | 0.0359764  | Down |
| NM_170777    | Elof1         | -1.58326 | 1 | -1.72825 | 158.447  | 45.4744    | Down |
| NM_001136064 | Bsc12         | -1.5822  | 1 | -1.80601 | 36.6581  | 9.95267    | Down |
| NM_175563    | Prr11         | -1.58089 | 1 | -2.56074 | 1.49329  | 0.225109   | Down |
| NM_175198    | Prox2         | -1.58067 | 1 | -2.0257  | 7.30191  | 1.68637    | Down |
| NM_001033379 | Dcp1b         | -1.5803  | 1 | -2.00162 | 6.54621  | 1.53946    | Down |
| NM_025384    | Dnajc15       | -1.57997 | 1 | -1.77584 | 143.365  | 39.7731    | Down |
| NM_001013022 | Odf3b         | -1.57937 | 1 | -2.95223 | 4.42282  | 0.483208   | Down |
| NM_021790    | Cenpk         | -1.57937 | 1 | -2.95223 | 3.77957  | 0.412931   | Down |
| NM_146001    | Hip1          | -1.5763  | 1 | -1.89438 | 4.6669   | 1.18814    | Down |
| NM_008458    | Serpina3c     | -1.57607 | 1 | -2.31401 | 4.6187   | 0.849597   | Down |
| NM_024452    | Luzp1         | -1.57465 | 1 | -1.70482 | 27.2237  | 7.94287    | Down |
| NM_144914    | Tmem184a      | -1.57292 | 1 | -1.90073 | 18.5948  | 4.7114     | Down |
| NM_009274    | Srpk2         | -1.5723  | 1 | -1.69835 | 33.8719  | 9.92759    | Down |
| NM_001039934 | Mtap2         | -1.57206 | 1 | -1.99094 | 3.95179  | 0.936404   | Down |
| NM_001190786 | Ddx19b        | -1.57184 | 1 | -1.71408 | 26.1733  | 7.58624    | Down |
| NM_194335    | Naif1         | -1.57086 | 1 | -2.06547 | 5.0518   | 1.13128    | Down |
| NM_027455    | Qpct          | -1.57037 | 1 | -2.15774 | 6.08545  | 1.26866    | Down |
| NM_026641    | Ift80         | -1.57014 | 1 | -1.77923 | 19.9196  | 5.51158    | Down |
| NM_001033400 | Gm806         | -1.56906 | 1 | -4.47111 | 0.629096 | 0          | Down |
| NM_001042503 | Trim71        | -1.56906 | 1 | -4.47111 | 0.308732 | 0          | Down |
| NM_001081202 | L1td1         | -1.56906 | 1 | -3.47111 | 0.544846 | 0.0244021  | Down |
| NM_008421    | Kcnc1         | -1.56906 | 1 | -3.47111 | 0.205821 | 0.00921815 | Down |
| NM_010824    | Mpo           | -1.56906 | 1 | -4.47111 | 0.629591 | 0          | Down |
| NM_011077    | Phex          | -1.56906 | 1 | -4.47111 | 0.255856 | 0          | Down |
| NM_018826    | Irx5          | -1.56906 | 1 | -4.47111 | 0.667057 | 0          | Down |
| NM_020020    | Magea8        | -1.56906 | 1 | -4.47111 | 0.973838 | 0          | Down |
| NM_021323    | Usp29         | -1.56906 | 1 | -3.47111 | 0.21901  | 0.00980885 | Down |
| NM_029686    | Pkd112        | -1.56906 | 1 | -4.47111 | 0.217024 | 0          | Down |
| NM_198618    | Dlgap3        | -1.56906 | 1 | -4.47111 | 0.419947 | 0          | Down |
| NM_201531    | Kcnf1         | -1.56906 | 1 | -4.47111 | 0.334712 | 0          | Down |
| NR_015462    | Al314831      | -1.56906 | 1 | -4.47111 | 0.490645 | 0          | Down |
| NM_028077    | 1810055G02Rik | -1.569   | 1 | -1.85502 | 23.7371  | 6.21782    | Down |
| NM_029227    | Tom20l        | -1.56785 | 1 | -2.48818 | 9.82249  | 1.56591    | Down |
| NM_146127    | Fam110a       | -1.56638 | 1 | -1.9444  | 15.0193  | 3.68369    | Down |
| NM_009826    | Rb1cc1        | -1.56469 | 1 | -1.66801 | 45.4992  | 13.6226    | Down |
| NM_001035228 | St3gal5       | -1.56429 | 1 | -2.3191  | 3.33504  | 0.610031   | Down |
| NM_001024910 | Sept10        | -1.56366 | 1 | -1.80912 | 32.7607  | 8.87038    | Down |
| NM_001163004 | Pkd212        | -1.56069 | 1 | -2.15623 | 5.32831  | 1.11121    | Down |
| NM_025944    | 2810432L12Rik | -1.5601  | 1 | -2.10116 | 4.53249  | 0.986735   | Down |
| NM_021501    | Pias4         | -1.55846 | 1 | -1.8805  | 21.3312  | 5.48253    | Down |
| NM_021346    | Zfp318        | -1.55624 | 1 | -1.76784 | 20.1663  | 5.62384    | Down |
| NM_025920    | Thap4         | -1.55621 | 1 | -1.78885 | 30.4907  | 8.37561    | Down |
| NM_001100460 | Zbtb42        | -1.554   | 1 | -1.88615 | 9.59831  | 2.45633    | Down |
| NM_133672    | Vps26a        | -1.55306 | 1 | -1.67295 | 78.5224  | 23.425     | Down |
| NM_146096    | Fam108b       | -1.55179 | 1 | -1.80231 | 23.0339  | 6.26539    | Down |
| NM_001191044 | Ddx43         | -1.55067 | 1 | -3.11881 | 1.45128  | 0.129997   | Down |
| NM_001038998 | Ccdc23        | -1.54908 | 1 | -1.92957 | 32.1126  | 7.95691    | Down |
| NM_001162956 | Ccdc138       | -1.54792 | 1 | -2.2722  | 3.22181  | 0.611359   | Down |
| NM_001167922 | Gtf2e2        | -1.54535 | 1 | -1.82018 | 28.6059  | 7.67956    | Down |
| NM_013717    | B9d1          | -1.54503 | 1 | -2.02365 | 21.3962  | 4.93849    | Down |
| NM_133236    | Glcci1        | -1.54336 | 1 | -1.79573 | 9.02054  | 2.46478    | Down |
| NM_001142781 | Fam188b       | -1.54183 | 1 | -1.92656 | 5.89207  | 1.46272    | Down |
| NM_019995    | Fam48a        | -1.54171 | 1 | -1.78204 | 31.1989  | 8.60908    | Down |
| NM_001044704 | Zscan21       | -1.54012 | 1 | -1.7675  | 29.7166  | 8.28598    | Down |
| NM_024267    | Ipo4          | -1.53996 | 1 | -1.71103 | 32.7331  | 9.50321    | Down |
| NM_021452    | Kcnmb4        | -1.53967 | 1 | -1.90036 | 28.2239  | 7.14338    | Down |
| NM_011304    | Ruvbl2        | -1.53814 | 1 | -1.73572 | 53.3411  | 15.2154    | Down |
| NM_023879    | Rpgrip1       | -1.53772 | 1 | -1.72868 | 18.3023  | 5.24695    | Down |
| NM_001103171 | Myo15         | -1.53761 | 1 | -2.86597 | 0.416468 | 0.0490292  | Down |
| NM_009360    | Tfam          | -1.53592 | 1 | -1.72179 | 25.6323  | 7.38432    | Down |
| NR_024323    | 4930426L09Rik | -1.53431 | 1 | -3.30118 | 1.45389  | 0.0966231  | Down |
| NM_027269    | 1110034A24Rik | -1.53274 | 1 | -1.89703 | 10.5107  | 2.66598    | Down |
| NM_010804    | Mllt10        | -1.53016 | 1 | -1.69197 | 26.8159  | 7.89025    | Down |
| NM_001109657 | Gas7          | -1.53013 | 1 | -1.88615 | 4.09147  | 1.04604    | Down |
| NM_019641    | Stmn1         | -1.5277  | 1 | -1.75288 | 65.1563  | 18.3541    | Down |
| NM_011445    | Sox6          | -1.52685 | 1 | -1.76274 | 7.67495  | 2.14666    | Down |

|              |               |          |   |          |          |           |      |
|--------------|---------------|----------|---|----------|----------|-----------|------|
| NM_172287    | Spire2        | -1.52132 | 1 | -2.27846 | 3.10676  | 0.584667  | Down |
| NM_175021    | Samd4b        | -1.52119 | 1 | -1.72524 | 18.9509  | 5.44441   | Down |
| NM_145946    | Fanci         | -1.52007 | 1 | -1.9996  | 3.57593  | 0.839297  | Down |
| NM_152839    | Igj           | -1.51642 | 1 | -1.98078 | 8.32204  | 1.98091   | Down |
| NR_033145    | Dand5         | -1.51642 | 1 | -1.98078 | 14.2799  | 3.39908   | Down |
| NM_008507    | Sh2b3         | -1.51621 | 1 | -1.85471 | 12.7199  | 3.32633   | Down |
| NM_175482    | Usp28         | -1.51586 | 1 | -2.10559 | 2.67542  | 0.578411  | Down |
| NM_023314    | Eif4e2        | -1.51445 | 1 | -1.78427 | 14.2918  | 3.93433   | Down |
| NM_025911    | Ccdc91        | -1.51393 | 1 | -1.69903 | 40.6991  | 11.9116   | Down |
| NM_027198    | Zswim7        | -1.51311 | 1 | -2.05607 | 17.4232  | 3.91414   | Down |
| NM_027162    | Mif4gd        | -1.51283 | 1 | -1.71911 | 49.0167  | 14.1413   | Down |
| NM_175498    | Pnma2         | -1.51019 | 1 | -3.17155 | 0.586173 | 0.04767   | Down |
| NM_016872    | Vamp5         | -1.50767 | 1 | -2.23407 | 4.69412  | 0.914812  | Down |
| NM_029327    | Lymr7         | -1.50682 | 1 | -2.02792 | 6.45779  | 1.48192   | Down |
| NM_001159583 | 2310028H24Rik | -1.50668 | 1 | -2.0129  | 7.03869  | 1.63393   | Down |
| NM_029281    | Zfp820        | -1.50644 | 1 | -1.89019 | 6.71466  | 1.70977   | Down |
| NM_001007574 | A830010M20Rik | -1.50633 | 1 | -1.88226 | 3.81681  | 0.977615  | Down |
| NM_027268    | Scrn1         | -1.50568 | 1 | -2.30118 | 3.72585  | 0.686802  | Down |
| NR_024331    | 1700008J07Rik | -1.50462 | 1 | -1.89897 | 9.68594  | 2.4501    | Down |
| NM_029432    | 4930402H24Rik | -1.50423 | 1 | -1.73145 | 13.5416  | 3.87158   | Down |
| NM_001103182 | Lin9          | -1.50419 | 1 | -2.07285 | 4.02795  | 0.892562  | Down |
| NM_001198587 | Nrxn3         | -1.50405 | 1 | -2.48949 | 0.6849   | 0.108541  | Down |
| NM_027495    | Tmem144       | -1.50076 | 1 | -1.76815 | 21.3761  | 5.95126   | Down |
| NM_001008420 | Cdh12         | -1.50015 | 1 | -4.40971 | 0.2719   | 0         | Down |
| NM_001033539 | Bex6          | -1.50015 | 1 | -4.40971 | 1.55976  | 0         | Down |
| NM_001080811 | Gm5840        | -1.50015 | 1 | -4.40971 | 0.975346 | 0         | Down |
| NM_001205108 | Ssxb6         | -1.50015 | 1 | -3.40971 | 2.93725  | 0.137531  | Down |
| NM_007608    | Car5a         | -1.50015 | 1 | -3.40971 | 1.23749  | 0.0579427 | Down |
| NM_007959    | Etv2          | -1.50015 | 1 | -4.40971 | 1.46302  | 0         | Down |
| NM_023455    | Nat8          | -1.50015 | 1 | -3.40971 | 1.64511  | 0.0770289 | Down |
| NM_028914    | 4933406J08Rik | -1.50015 | 1 | -4.40971 | 0.726312 | 0         | Down |
| NM_029199    | 4930542N07Rik | -1.50015 | 1 | -3.40971 | 1.59215  | 0.0745493 | Down |
| NM_029971    | Pmch          | -1.50015 | 1 | -4.40971 | 2.04979  | 0         | Down |
| NM_145123    | Crtac1        | -1.50015 | 1 | -3.40971 | 0.586103 | 0.027443  | Down |
| NM_153396    | Mical3        | -1.49991 | 1 | -1.65046 | 51.2703  | 15.5291   | Down |
| NM_172660    | D2Wsu81e      | -1.49964 | 1 | -1.72695 | 36.3632  | 10.4288   | Down |
| NM_030188    | Ttc30a1       | -1.49764 | 1 | -1.71091 | 26.3723  | 7.65068   | Down |
| NR_033593    | 4930529C04Rik | -1.49656 | 1 | -2.196   | 2.32902  | 0.467627  | Down |
| NM_172407    | Cdkn2aip      | -1.49636 | 1 | -1.71452 | 20.6645  | 5.97916   | Down |
| NM_026063    | 2900010M23Rik | -1.49601 | 1 | -1.70227 | 170.033  | 49.6314   | Down |
| NM_007941    | Stx2          | -1.49593 | 1 | -1.88204 | 8.33933  | 2.13532   | Down |
| NM_183091    | Tonsl         | -1.49522 | 1 | -2.20807 | 1.88852  | 0.375422  | Down |
| NM_009793    | Camk4         | -1.49432 | 1 | -2.02663 | 1.09081  | 0.250346  | Down |
| NM_013908    | Fbxw5         | -1.49314 | 1 | -1.68102 | 40.7699  | 12.0818   | Down |
| NR_027699    | Serp2         | -1.49312 | 1 | -2.41864 | 6.19493  | 1.03698   | Down |
| NM_145409    | Chtf18        | -1.49293 | 1 | -2.23529 | 2.37845  | 0.462273  | Down |
| NM_008444    | Kif3b         | -1.49259 | 1 | -1.63802 | 28.0826  | 8.58024   | Down |
| NM_028908    | 4933403G14Rik | -1.49177 | 1 | -1.82956 | 8.81965  | 2.34717   | Down |
| NM_133728    | Asnsd1        | -1.48938 | 1 | -1.62085 | 81.3773  | 25.1664   | Down |
| NM_021557    | Rdh11         | -1.48917 | 1 | -1.65152 | 80.9394  | 24.4929   | Down |
| NM_013754    | Insl6         | -1.48762 | 1 | -1.73778 | 83.7371  | 23.8215   | Down |
| NM_001165953 | Trim45        | -1.48726 | 1 | -1.96015 | 3.58438  | 0.865138  | Down |
| NM_028354    | Tdp1          | -1.48548 | 1 | -1.99253 | 7.12191  | 1.67687   | Down |
| NM_008803    | Pde8a         | -1.48525 | 1 | -1.7675  | 16.3387  | 4.54881   | Down |
| NM_028833    | Iqce          | -1.48266 | 1 | -1.71802 | 14.2136  | 4.10093   | Down |
| NM_020333    | Slc12a5       | -1.48249 | 1 | -2.32909 | 0.995118 | 0.178792  | Down |
| NM_016707    | Bcl11a        | -1.48157 | 1 | -3.05607 | 0.895325 | 0.0838435 | Down |
| NM_010201    | Fgf14         | -1.48021 | 1 | -2.20807 | 2.68999  | 0.533856  | Down |
| NM_025638    | Gdpd1         | -1.47948 | 1 | -1.67537 | 35.4637  | 10.549    | Down |
| NM_153119    | Plekho2       | -1.47932 | 1 | -1.83676 | 8.55429  | 2.26338   | Down |
| NM_027604    | Usp15         | -1.47862 | 1 | -1.59223 | 79.1226  | 24.9649   | Down |
| NM_025852    | Rexo1         | -1.47851 | 1 | -1.73686 | 9.85181  | 2.8038    | Down |
| NM_010751    | Mxd1          | -1.47589 | 1 | -1.78551 | 7.84999  | 2.15635   | Down |
| NM_053072    | Fgd6          | -1.47558 | 1 | -1.77342 | 4.89514  | 1.35657   | Down |
| NM_001145100 | Gm13718       | -1.47533 | 1 | -2.91168 | 1.10875  | 0.122371  | Down |
| NM_024196    | Tbc1d20       | -1.47436 | 1 | -1.6894  | 37.9063  | 11.1617   | Down |
| NM_029508    | Pcgf5         | -1.47393 | 1 | -2.00162 | 8.95986  | 2.09331   | Down |
| NM_009022    | Aldh1a2       | -1.47344 | 1 | -1.82474 | 12.7134  | 3.39295   | Down |
| NM_008017    | Smc2          | -1.47187 | 1 | -1.8102  | 5.80229  | 1.56507   | Down |
| NM_001167697 | Gpr19         | -1.46892 | 1 | -2.0391  | 6.73672  | 1.52835   | Down |
| NM_001081051 | D130043K22Rik | -1.46872 | 1 | -3.13407 | 0.518111 | 0.0432736 | Down |
| NM_175207    | Ankrd9        | -1.46791 | 1 | -1.92009 | 7.00199  | 1.74005   | Down |
| NM_153098    | Cd109         | -1.46198 | 1 | -1.92831 | 2.87467  | 0.709711  | Down |
| NM_001163103 | Gm70          | -1.46155 | 1 | -1.79225 | 22.0638  | 6.02787   | Down |
| NM_027742    | Lrrfip2       | -1.45924 | 1 | -1.74209 | 13.3967  | 3.7961    | Down |
| NM_026473    | Tubb6         | -1.4585  | 1 | -1.86343 | 12.5479  | 3.252     | Down |

|              |               |          |   |          |          |           |      |
|--------------|---------------|----------|---|----------|----------|-----------|------|
| NM_001080793 | Ash2l         | -1.45791 | 1 | -1.63067 | 47.9045  | 14.7049   | Down |
| NM_145703    | Kcnip2        | -1.45739 | 1 | -2.84034 | 5.22911  | 0.618126  | Down |
| NM_010942    | Nsg1          | -1.45673 | 1 | -1.96492 | 6.70876  | 1.61026   | Down |
| NM_013629    | Phtf1         | -1.45555 | 1 | -1.73692 | 13.0386  | 3.70812   | Down |
| NM_013533    | Gpr162        | -1.45312 | 1 | -2.27442 | 2.2927   | 0.429404  | Down |
| NR_027359    | 5930416119Rik | -1.4529  | 1 | -1.84034 | 15.776   | 4.15833   | Down |
| NR_030669    | 1700034H15Rik | -1.45258 | 1 | -2.08778 | 2.18889  | 0.47729   | Down |
| NM_028696    | Obfc2a        | -1.44993 | 1 | -1.68684 | 21.1927  | 6.24819   | Down |
| NM_177588    | Thnsl1        | -1.44966 | 1 | -1.73274 | 10.975   | 3.13015   | Down |
| NM_018804    | Syt11         | -1.44885 | 1 | -1.77614 | 7.11121  | 1.96494   | Down |
| NM_009287    | Stim1         | -1.44849 | 1 | -1.74606 | 10.7904  | 3.04773   | Down |
| NM_010195    | Lgr5          | -1.4458  | 1 | -3.02365 | 0.636127 | 0.060956  | Down |
| NM_182745    | 1700028K03Rik | -1.4458  | 1 | -3.02365 | 3.76956  | 0.361212  | Down |
| NM_001038643 | Slco3a1       | -1.44575 | 1 | -1.93216 | 5.41541  | 1.33179   | Down |
| NM_013782    | Ptdss2        | -1.44491 | 1 | -1.71023 | 22.2363  | 6.44532   | Down |
| NM_001099307 | Gm7173        | -1.4445  | 1 | -2.14667 | 2.80544  | 0.583048  | Down |
| NM_001077499 | Scn8a         | -1.44363 | 1 | -2.43363 | 0.46285  | 0.0762855 | Down |
| NM_001033301 | Fhdc1         | -1.4428  | 1 | -1.74717 | 6.26414  | 1.76753   | Down |
| NM_029610    | Lymr1         | -1.44057 | 1 | -1.99885 | 9.39435  | 2.19424   | Down |
| NM_001172073 | Ttc4          | -1.43926 | 1 | -1.61354 | 42.0869  | 13.0732   | Down |
| NM_146152    | Ipo13         | -1.43712 | 1 | -1.66811 | 17.4815  | 5.22225   | Down |
| NM_027654    | Pcgf6         | -1.43593 | 1 | -1.7103  | 21.4925  | 6.22782   | Down |
| NR_028111    | 4930523C07Rik | -1.43495 | 1 | -2.3191  | 3.04004  | 0.548023  | Down |
| NM_027658    | Hexim2        | -1.43479 | 1 | -1.94386 | 7.338    | 1.78733   | Down |
| NM_026236    | Wdr48         | -1.43272 | 1 | -1.60377 | 29.2561  | 9.15001   | Down |
| NM_033079    | D6Mm5e        | -1.43191 | 1 | -2.04142 | 4.96108  | 1.12009   | Down |
| NM_001113323 | Glb1l3        | -1.43168 | 1 | -1.66193 | 25.5305  | 7.65965   | Down |
| NM_001164225 | Fbxl16        | -1.43061 | 1 | -3.20807 | 0.577621 | 0.0410351 | Down |
| NM_027239    | 1810065E05Rik | -1.43061 | 1 | -3.20807 | 2.18497  | 0.155224  | Down |
| NM_027740    | Poc1b         | -1.42982 | 1 | -1.83568 | 7.87144  | 2.07975   | Down |
| NM_013686    | Tcp1          | -1.42966 | 1 | -1.50964 | 209.256  | 69.9377   | Down |
| NM_001039106 | Ddhd1         | -1.42944 | 1 | -1.58042 | 28.3805  | 9.024     | Down |
| NM_029781    | Rab36         | -1.42835 | 1 | -2.27846 | 2.20783  | 0.411017  | Down |
| NM_001025565 | Lhx9          | -1.4278  | 1 | -3.34558 | 0.297228 | 0.0145798 | Down |
| NM_001044308 | Cacna1i       | -1.4278  | 1 | -3.34558 | 0.149434 | 0.0073301 | Down |
| NM_001163191 | Otud6a        | -1.4278  | 1 | -4.34558 | 1.67646  | 0         | Down |
| NM_007719    | Ccr7          | -1.4278  | 1 | -3.34558 | 0.741039 | 0.0363499 | Down |
| NM_007938    | Epha6         | -1.4278  | 1 | -4.34558 | 0.347389 | 0         | Down |
| NM_010278    | Gfi1          | -1.4278  | 1 | -3.34558 | 0.511195 | 0.0250754 | Down |
| NM_011388    | Slc10a2       | -1.4278  | 1 | -3.34558 | 0.898436 | 0.0440706 | Down |
| NM_021480    | Tdh           | -1.4278  | 1 | -3.34558 | 0.778071 | 0.0381664 | Down |
| NM_023493    | Cml5          | -1.4278  | 1 | -4.34558 | 1.48433  | 0         | Down |
| NM_026884    | Fam57b        | -1.4278  | 1 | -3.34558 | 0.772731 | 0.0379044 | Down |
| NM_029425    | 4833424O15Rik | -1.4278  | 1 | -3.34558 | 0.361907 | 0.0177525 | Down |
| NR_001581    | Speer6-ps1    | -1.4278  | 1 | -4.34558 | 1.49495  | 0         | Down |
| NR_015541    | 1700066O22Rik | -1.4278  | 1 | -4.34558 | 1.52453  | 0         | Down |
| NR_030735    | 1700086L19Rik | -1.42684 | 1 | -1.76505 | 36.8462  | 10.2559   | Down |
| NM_012034    | Tpsg1         | -1.42603 | 1 | -3.0956  | 2.06158  | 0.17697   | Down |
| NM_182992    | Mypn          | -1.42603 | 1 | -3.0956  | 0.478259 | 0.0410547 | Down |
| NM_001199060 | Wdr12         | -1.42445 | 1 | -1.70273 | 14.0463  | 4.09111   | Down |
| NM_028300    | Pih1d2        | -1.42357 | 1 | -1.99577 | 9.02299  | 2.10982   | Down |
| NM_001198789 | Gm5918        | -1.42316 | 1 | -1.67801 | 72.9459  | 21.6287   | Down |
| NM_001081012 | 4930473A06Rik | -1.41925 | 1 | -1.72226 | 8.17833  | 2.34808   | Down |
| NM_001033531 | Klhl32        | -1.41906 | 1 | -2.49101 | 2.19409  | 0.3453    | Down |
| NM_001111268 | Grik2         | -1.41906 | 1 | -2.49101 | 1.04867  | 0.165037  | Down |
| NM_028953    | Tmc1          | -1.41836 | 1 | -2.71396 | 1.19777  | 0.158635  | Down |
| NM_001130476 | Tpst1         | -1.41819 | 1 | -1.73356 | 17.7021  | 5.04056   | Down |
| NM_026653    | Rpa1          | -1.41814 | 1 | -1.58221 | 39.5301  | 12.551    | Down |
| NM_007603    | Capn6         | -1.41716 | 1 | -2.03589 | 2.76575  | 0.626378  | Down |
| NM_177628    | Fam167a       | -1.41625 | 1 | -1.86378 | 4.19639  | 1.08492   | Down |
| NM_007634    | Ccnf          | -1.41573 | 1 | -2.01785 | 3.32835  | 0.764473  | Down |
| NM_133347    | Dhx30         | -1.41533 | 1 | -1.55267 | 43.5157  | 14.108    | Down |
| NM_010629    | Kifap3        | -1.41504 | 1 | -1.62583 | 18.9261  | 5.82486   | Down |
| NM_017377    | B4galt2       | -1.41025 | 1 | -2.00479 | 4.37391  | 1.0145    | Down |
| NM_206882    | Hist3h2bb-ps  | -1.40912 | 1 | -2.99048 | 6.29485  | 0.617557  | Down |
| NM_138673    | Stab2         | -1.40883 | 1 | -2.10027 | 0.985453 | 0.211851  | Down |
| NM_030697    | Kank3         | -1.40835 | 1 | -1.7695  | 10.028   | 2.78006   | Down |
| NM_001134300 | 8430427H17Rik | -1.40796 | 1 | -1.57233 | 18.632   | 5.95641   | Down |
| NM_138657    | Socs7         | -1.40767 | 1 | -1.6032  | 12.1404  | 3.79679   | Down |
| NM_001034866 | Pnlnc1        | -1.40559 | 1 | -2.79304 | 2.43451  | 0.297535  | Down |
| NM_022420    | Gprc5b        | -1.4054  | 1 | -1.76831 | 5.77566  | 1.60241   | Down |
| NM_177613    | Cdc34         | -1.40372 | 1 | -1.73223 | 24.8825  | 7.08837   | Down |
| NM_009471    | Umps          | -1.40308 | 1 | -1.868   | 5.10952  | 1.31583   | Down |
| NM_172541    | Tmem120a      | -1.40168 | 1 | -1.67263 | 35.5009  | 10.5608   | Down |
| NM_010599    | Kcnab3        | -1.40032 | 1 | -2.22495 | 2.335    | 0.452761  | Down |
| NM_028315    | Dis3          | -1.40008 | 1 | -1.64831 | 14.3992  | 4.35915   | Down |

|              |               |          |   |          |          |           |      |
|--------------|---------------|----------|---|----------|----------|-----------|------|
| NM_001002898 | Sirpb1a       | -1.39871 | 1 | -2.73859 | 3.62041  | 0.466175  | Down |
| NM_001025779 | Cdc6          | -1.39871 | 1 | -2.73859 | 0.98419  | 0.126727  | Down |
| NM_009319    | Tarbp2        | -1.39869 | 1 | -1.7179  | 19.1094  | 5.50011   | Down |
| NR_029475    | 4930581F22Rik | -1.39845 | 1 | -1.8102  | 8.55929  | 2.30138   | Down |
| NM_026604    | Fam135a       | -1.39831 | 1 | -1.5393  | 24.7325  | 8.09272   | Down |
| NM_028170    | 1700030K09Rik | -1.39779 | 1 | -1.73414 | 12.3765  | 3.52004   | Down |
| NM_153287    | Csrnp1        | -1.39702 | 1 | -1.80637 | 7.18633  | 1.93761   | Down |
| NR_024558    | Gm11166       | -1.39563 | 1 | -2.08778 | 4.83566  | 1.04868   | Down |
| NM_001081242 | Tln2          | -1.39561 | 1 | -1.53915 | 12.7106  | 4.15931   | Down |
| NM_008893    | Pola2         | -1.39483 | 1 | -1.80918 | 8.3666   | 2.25087   | Down |
| NM_001167679 | Wdr67         | -1.39479 | 1 | -1.86737 | 4.53611  | 1.16817   | Down |
| NM_027182    | Trip13        | -1.39396 | 1 | -2.32672 | 2.30568  | 0.411682  | Down |
| NM_001110271 | Abhd14a       | -1.39292 | 1 | -1.70678 | 24.746   | 7.1791    | Down |
| NM_008774    | Pabpc1        | -1.39091 | 1 | -1.48882 | 115.413  | 39.1286   | Down |
| NM_178890    | Abtb2         | -1.38967 | 1 | -2.83368 | 0.810383 | 0.0945033 | Down |
| NR_030731    | Phf21b        | -1.38967 | 1 | -2.83368 | 0.997226 | 0.116292  | Down |
| NM_028377    | 2900006K08Rik | -1.38376 | 1 | -1.59199 | 34.0191  | 10.7195   | Down |
| NR_038030    | 4930562F07Rik | -1.38231 | 1 | -2.07518 | 9.48832  | 2.07588   | Down |
| NM_013868    | Hspb7         | -1.38228 | 1 | -2.20807 | 2.11496  | 0.414977  | Down |
| NM_001081387 | Ctcf1         | -1.38205 | 1 | -3.05607 | 0.758238 | 0.0669484 | Down |
| NM_001195674 | Gm600         | -1.38203 | 1 | -3.05607 | 0.950605 | 0.0839333 | Down |
| NM_029851    | Dync2h1       | -1.37934 | 1 | -1.47735 | 23.1096  | 7.89742   | Down |
| NM_008770    | Cldn11        | -1.37902 | 1 | -1.69653 | 17.7211  | 5.17723   | Down |
| NM_172813    | Enox1         | -1.37897 | 1 | -2.76879 | 1.30858  | 0.162686  | Down |
| NM_183112    | 1700029I15Rik | -1.37699 | 1 | -2.88615 | 8.99881  | 0.98614   | Down |
| NM_053273    | Ttyh2         | -1.37668 | 1 | -2.08254 | 2.19807  | 0.477776  | Down |
| NM_178638    | Tmem108       | -1.37584 | 1 | -3.15916 | 0.528549 | 0.03889   | Down |
| NM_175275    | Cntln         | -1.37574 | 1 | -1.72684 | 4.97626  | 1.42173   | Down |
| NM_017404    | Mrpl39        | -1.36869 | 1 | -1.58163 | 68.8794  | 21.8585   | Down |
| NM_027988    | Noxo1         | -1.36762 | 1 | -2.01685 | 3.92373  | 0.898189  | Down |
| NM_028453    | Otud3         | -1.36549 | 1 | -1.68009 | 20.0732  | 5.93243   | Down |
| NM_016723    | Uchl3         | -1.36461 | 1 | -1.831   | 17.2359  | 4.55448   | Down |
| NM_018862    | Agpat1        | -1.36397 | 1 | -1.54334 | 50.6727  | 16.5245   | Down |
| NM_011932    | Dapp1         | -1.36286 | 1 | -1.82577 | 5.25857  | 1.3949    | Down |
| NM_008487    | Arhgef2       | -1.36283 | 1 | -1.62311 | 11.1671  | 3.43929   | Down |
| NM_001111028 | Kctd9         | -1.36149 | 1 | -1.66218 | 11.0219  | 3.29974   | Down |
| NM_001081457 | Ppp2r5c       | -1.36082 | 1 | -1.51377 | 32.598   | 10.8552   | Down |
| NM_001013368 | E2f8          | -1.35997 | 1 | -2.80671 | 0.981857 | 0.116702  | Down |
| NM_175470    | Gpr61         | -1.35997 | 1 | -2.80671 | 0.983188 | 0.11686   | Down |
| NM_001170555 | Prkag2        | -1.35979 | 1 | -1.58122 | 28.9129  | 9.17629   | Down |
| NM_018808    | Dnajb1        | -1.3589  | 1 | -1.51825 | 54.5477  | 18.1063   | Down |
| NM_001080773 | Pdpk1         | -1.35826 | 1 | -1.55067 | 48.5834  | 15.759    | Down |
| NR_027488    | Senp2         | -1.35768 | 1 | -1.53734 | 21.4146  | 7.01243   | Down |
| NM_025576    | Ptpmt1        | -1.35631 | 1 | -1.63254 | 32.3405  | 9.89096   | Down |
| NM_030172    | 2610021K21Rik | -1.3563  | 1 | -2.24604 | 2.56001  | 0.485777  | Down |
| NM_001004366 | Scube3        | -1.35187 | 1 | -2.74413 | 1.33216  | 0.168523  | Down |
| NM_001025574 | 5430413K10Rik | -1.35169 | 1 | -3.27846 | 0.68126  | 0.0350885 | Down |
| NM_001030305 | Pmp2          | -1.35169 | 1 | -4.27846 | 1.02189  | 0         | Down |
| NM_001033266 | Gm525         | -1.35169 | 1 | -3.27846 | 2.39907  | 0.123564  | Down |
| NM_029172    | Fam164b       | -1.35169 | 1 | -3.27846 | 1.3237   | 0.0681776 | Down |
| NM_080853    | Slc17a6       | -1.35169 | 1 | -3.27846 | 0.322652 | 0.0166183 | Down |
| NM_152923    | Kcnq3         | -1.35169 | 1 | -4.27846 | 0.484315 | 0         | Down |
| NM_153100    | Rtp3          | -1.35169 | 1 | -4.27846 | 0.567763 | 0         | Down |
| NM_175167    | 4833413D08Rik | -1.35169 | 1 | -3.27846 | 0.683935 | 0.0352262 | Down |
| NR_033588    | AY512931      | -1.35169 | 1 | -4.27846 | 0.581987 | 0         | Down |
| NR_033785    | 1700044K03Rik | -1.35169 | 1 | -3.27846 | 3.69724  | 0.190427  | Down |
| NM_018740    | Rai12         | -1.35046 | 1 | -1.55146 | 54.5993  | 17.6978   | Down |
| NM_194257    | Fam118b       | -1.34966 | 1 | -1.53871 | 55.1101  | 18.0262   | Down |
| NM_146039    | Wdr60         | -1.34567 | 1 | -1.55742 | 18.9902  | 6.12873   | Down |
| NM_001039126 | Asb1          | -1.34557 | 1 | -1.5509  | 12.5706  | 4.07589   | Down |
| NM_027980    | 2310003H01Rik | -1.34499 | 1 | -1.68153 | 9.19727  | 2.71336   | Down |
| NM_024263    | Mxra8         | -1.34488 | 1 | -1.64885 | 15.6447  | 4.72685   | Down |
| NM_133201    | Mfn2          | -1.34477 | 1 | -1.50298 | 28.4058  | 9.52948   | Down |
| NM_153136    | Nudt18        | -1.3434  | 1 | -1.59886 | 13.2597  | 4.15368   | Down |
| NM_001014974 | Ttll4         | -1.34284 | 1 | -1.57401 | 14.0271  | 4.47322   | Down |
| NM_025329    | Tctex1d2      | -1.34163 | 1 | -1.92462 | 16.6777  | 4.09584   | Down |
| NM_028042    | Ercc8         | -1.34163 | 1 | -1.92462 | 4.99461  | 1.22661   | Down |
| NM_175199    | Hspa12a       | -1.34071 | 1 | -1.79761 | 2.86892  | 0.776389  | Down |
| NM_177261    | Kndc1         | -1.337   | 1 | -2.33545 | 0.668014 | 0.117964  | Down |
| NM_001081971 | Gm1337        | -1.3367  | 1 | -3.01543 | 0.487463 | 0.0443063 | Down |
| NM_001166705 | 1700101E01Rik | -1.3367  | 1 | -3.01543 | 2.54518  | 0.231335  | Down |
| NR_027986    | 4930474M22Rik | -1.3367  | 1 | -3.01543 | 3.86551  | 0.351342  | Down |
| NM_021788    | Sap30         | -1.3365  | 1 | -1.99765 | 7.06944  | 1.63851   | Down |
| NM_001081329 | Zkscan2       | -1.33596 | 1 | -2.22718 | 1.14251  | 0.219688  | Down |
| NM_173778    | Sh2d7         | -1.33596 | 1 | -2.22718 | 1.89452  | 0.364289  | Down |
| NM_027914    | Bbs10         | -1.33474 | 1 | -1.77596 | 6.35413  | 1.74718   | Down |

|                |               |          |   |          |          |           |      |
|----------------|---------------|----------|---|----------|----------|-----------|------|
| NM_029762      | Hyls1         | -1.3333  | 1 | -1.53488 | 47.0417  | 15.4244   | Down |
| NM_153600      | Ttc26         | -1.32972 | 1 | -1.70189 | 5.79091  | 1.68206   | Down |
| NM_001007154   | Phactr3       | -1.32964 | 1 | -2.77923 | 0.765527 | 0.0927732 | Down |
| NM_020026      | B3galnt1      | -1.32913 | 1 | -1.88615 | 5.97578  | 1.51059   | Down |
| NM_008550      | Man2b2        | -1.328   | 1 | -1.53663 | 21.0053  | 6.87805   | Down |
| NM_001013749   | Tmem151b      | -1.32774 | 1 | -1.80295 | 3.13194  | 0.843555  | Down |
| NM_010889      | Neb           | -1.32659 | 1 | -1.81776 | 0.635291 | 0.16919   | Down |
| NM_134063      | BC016423      | -1.32372 | 1 | -1.41945 | 39.4269  | 14.0258   | Down |
| NM_025979      | Mastl         | -1.32357 | 1 | -1.80671 | 3.16105  | 0.848775  | Down |
| NM_177616      | Ccdc157       | -1.32235 | 1 | -1.56765 | 10.2267  | 3.27463   | Down |
| NM_023884      | Ralgs2        | -1.32218 | 1 | -1.44977 | 26.9743  | 9.39331   | Down |
| NM_009900      | Cicn2         | -1.31907 | 1 | -1.67969 | 6.94061  | 2.04836   | Down |
| NM_008189      | Guca1a        | -1.31895 | 1 | -3.10854 | 2.15545  | 0.16447   | Down |
| NM_009384      | Tiam1         | -1.31873 | 1 | -1.61074 | 5.172    | 1.6052    | Down |
| NM_153413      | Dock3         | -1.31853 | 1 | -1.61666 | 3.99871  | 1.23573   | Down |
| NM_198421      | Usp49         | -1.31839 | 1 | -1.67429 | 4.64536  | 1.37639   | Down |
| NM_133791      | Wwc2          | -1.31728 | 1 | -1.53455 | 13.1983  | 4.32717   | Down |
| NM_178722      | Zfp438        | -1.31636 | 1 | -1.58268 | 13.9864  | 4.42961   | Down |
| NM_023058      | Pkmyt1        | -1.31569 | 1 | -1.88615 | 5.29789  | 1.33794   | Down |
| NM_001099298   | Scn2a1        | -1.3147  | 1 | -2.31499 | 0.553373 | 0.099136  | Down |
| NM_009358      | Ppp2r5d       | -1.31425 | 1 | -1.4844  | 36.3232  | 12.3414   | Down |
| NR_027414      | Fbxo34        | -1.31095 | 1 | -1.59901 | 10.835   | 3.39075   | Down |
| NM_174998      | Hpcal4        | -1.31084 | 1 | -2.06368 | 1.40824  | 0.308646  | Down |
| NM_023483      | 1110032A03Rik | -1.31074 | 1 | -1.45209 | 85.4149  | 29.6913   | Down |
| NM_144814      | Rcor3         | -1.3097  | 1 | -1.61175 | 22.0796  | 6.84581   | Down |
| NM_001033367   | Nlrc4         | -1.30945 | 1 | -2.24872 | 1.28926  | 0.243169  | Down |
| NM_026301      | Rnf125        | -1.30932 | 1 | -1.79304 | 10.9189  | 2.9599    | Down |
| NM_020570      | Xrcc2         | -1.30927 | 1 | -1.74555 | 5.48439  | 1.54077   | Down |
| NM_023277      | Jam3          | -1.30865 | 1 | -1.68698 | 11.6745  | 3.42556   | Down |
| NM_145078      | 2610305D13Rik | -1.30812 | 1 | -1.99306 | 3.02066  | 0.70081   | Down |
| NM_172705      | Phf13         | -1.30645 | 1 | -1.5891  | 12.7444  | 4.01644   | Down |
| NM_144898      | Msto1         | -1.30615 | 1 | -1.54284 | 30.6649  | 9.99173   | Down |
| NR_015524      | 4932415G12Rik | -1.30374 | 1 | -1.48647 | 22.2647  | 7.55238   | Down |
| NM_013780      | Npas3         | -1.30308 | 1 | -2.60861 | 0.770546 | 0.109903  | Down |
| NM_008162      | Gpx4          | -1.30305 | 1 | -1.41285 | 265.235  | 94.7763   | Down |
| NM_008948      | Psmc3         | -1.30182 | 1 | -1.45755 | 76.7262  | 26.5649   | Down |
| NM_199305      | Tmem39b       | -1.30166 | 1 | -1.69829 | 11.5898  | 3.3714    | Down |
| NM_001164220   | Trim13        | -1.30137 | 1 | -1.69587 | 12.9266  | 3.76695   | Down |
| NM_009975      | Csnk2b        | -1.30083 | 1 | -1.39254 | 314.269  | 113.908   | Down |
| NM_011956      | Nubp2         | -1.30078 | 1 | -1.52012 | 45.1786  | 14.9606   | Down |
| NM_020567      | Gmnn          | -1.29817 | 1 | -1.82341 | 12.7687  | 3.38013   | Down |
| NM_001081284   | Gm12695       | -1.29867 | 1 | -2.75122 | 2.12738  | 0.262971  | Down |
| NM_182927      | Spred3        | -1.29647 | 1 | -1.7585  | 3.88329  | 1.0797    | Down |
| NM_001161851   | Fbxo44        | -1.29453 | 1 | -1.5576  | 28.9057  | 9.31639   | Down |
| NM_029835      | 5730590G19Rik | -1.2944  | 1 | -2.18871 | 0.707002 | 0.139671  | Down |
| NM_198884      | B4galnt3      | -1.29356 | 1 | -2.15293 | 1.78881  | 0.363683  | Down |
| NR_029456      | A330050B17Rik | -1.29205 | 1 | -2.29423 | 1.06473  | 0.19355   | Down |
| NM_178693      | Coq4          | -1.29043 | 1 | -1.6675  | 11.5395  | 3.43238   | Down |
| NM_153092      | Nupl2         | -1.29037 | 1 | -1.63961 | 9.10392  | 2.76404   | Down |
| NM_027482      | 5730508B09Rik | -1.28995 | 1 | -1.93345 | 5.34762  | 1.29878   | Down |
| NM_008938      | Prph2         | -1.28991 | 1 | -2.97361 | 0.87381  | 0.0818286 | Down |
| NM_183224      | Fam19a3       | -1.28991 | 1 | -2.97361 | 0.53287  | 0.049901  | Down |
| NM_175106      | Tmem177       | -1.28974 | 1 | -1.71561 | 5.55002  | 1.59293   | Down |
| NM_172857      | Exd1          | -1.28852 | 1 | -1.74413 | 5.1222   | 1.43902   | Down |
| NR_027704      | Svip          | -1.2838  | 1 | -1.45393 | 35.4363  | 12.2973   | Down |
| NM_175751      | Zfp608        | -1.28197 | 1 | -1.54292 | 7.50294  | 2.44315   | Down |
| NM_183417      | Cdk2          | -1.27798 | 1 | -1.56853 | 15.3313  | 4.90021   | Down |
| NM_001039146   | Vmn1r90       | -1.2767  | 1 | -1.59375 | 8.05586  | 2.52798   | Down |
| NR_036607      | Gm3086        | -1.27379 | 1 | -2.79304 | 4.88294  | 0.571584  | Down |
| NR_033635      | 9130019P16Rik | -1.27186 | 1 | -2.01168 | 1.47589  | 0.33607   | Down |
| NM_022994      | Dap3          | -1.27183 | 1 | -1.43384 | 24.7268  | 8.70241   | Down |
| NM_001033880   | 4930415L06Rik | -1.27137 | 1 | -3.20807 | 0.505793 | 0.0274221 | Down |
| NM_001037248_2 | Gm5156        | -1.27137 | 1 | -4.20807 | 0.83755  | 0         | Down |
| NM_001126489   | Zfp735        | -1.27137 | 1 | -4.20807 | 0.352547 | 0         | Down |
| NM_001177691   | Gal3st1       | -1.27137 | 1 | -3.20807 | 0.817386 | 0.0443154 | Down |
| NM_001205075   | Phoc          | -1.27137 | 1 | -3.20807 | 0.630255 | 0.0341699 | Down |
| NM_010642      | Klk1b21       | -1.27137 | 1 | -4.20807 | 1.46641  | 0         | Down |
| NM_013873      | Sult4a1       | -1.27137 | 1 | -3.20807 | 0.555672 | 0.0301263 | Down |
| NM_021022      | Abcb11        | -1.27137 | 1 | -4.20807 | 0.270514 | 0         | Down |
| NM_022884      | Bhmt2         | -1.27137 | 1 | -4.20807 | 0.633572 | 0         | Down |
| NM_027126      | Hfe2          | -1.27137 | 1 | -3.20807 | 0.655203 | 0.0355225 | Down |
| NM_029844      | Mrap          | -1.27137 | 1 | -3.20807 | 1.33484  | 0.0723699 | Down |
| NM_182807      | Fam19a2       | -1.27137 | 1 | -3.20807 | 0.319924 | 0.017345  | Down |
| NR_036593      | 1700121N20Rik | -1.27137 | 1 | -4.20807 | 1.2881   | 0         | Down |
| NM_001014996   | Cenpj         | -1.27001 | 1 | -1.60235 | 6.59711  | 2.05681   | Down |
| NM_173449      | 4921523A10Rik | -1.26966 | 1 | -1.56043 | 14.9744  | 4.81313   | Down |

|                |               |          |   |          |          |           |      |
|----------------|---------------|----------|---|----------|----------|-----------|------|
| NM_029107      | 4930417G10Rik | -1.26623 | 1 | -1.58577 | 10.9226  | 3.44637   | Down |
| NM_177663      | lsg20I2       | -1.26544 | 1 | -1.51718 | 16.839   | 5.58347   | Down |
| NM_178872      | Trim36        | -1.26474 | 1 | -1.41464 | 29.1741  | 10.407    | Down |
| NM_021568      | Pcbp3         | -1.26404 | 1 | -1.44426 | 42.6168  | 14.8863   | Down |
| NM_031867      | Tas1r1        | -1.26377 | 1 | -1.785   | 4.45434  | 1.21155   | Down |
| NM_009797      | Capza1        | -1.26316 | 1 | -1.38121 | 66.3034  | 24.2157   | Down |
| NM_001081022   | D430042O09Rik | -1.26288 | 1 | -1.48405 | 10.0751  | 3.42083   | Down |
| NM_134152      | Lpxn          | -1.2593  | 1 | -1.75331 | 8.16486  | 2.27431   | Down |
| NM_019392      | Tyro3         | -1.25783 | 1 | -1.73976 | 3.58251  | 1.0081    | Down |
| NM_175494      | Zfp367        | -1.25714 | 1 | -1.50592 | 14.2182  | 4.75178   | Down |
| NM_178798      | Slc7a6        | -1.25666 | 1 | -1.58572 | 7.81009  | 2.4636    | Down |
| NM_144820      | Ccdc28a       | -1.25447 | 1 | -1.59109 | 23.9084  | 7.51158   | Down |
| NM_181316      | Bbs9          | -1.25434 | 1 | -1.5241  | 12.5497  | 4.13934   | Down |
| NM_009813      | Casq1         | -1.25429 | 1 | -2.56422 | 2.34293  | 0.344781  | Down |
| NM_001099738   | Dnajc28       | -1.2541  | 1 | -1.60743 | 7.19602  | 2.23395   | Down |
| NM_175664      | Hist1h2bb     | -1.25389 | 1 | -1.58064 | 62.9917  | 19.9419   | Down |
| NM_009025      | Rasa3         | -1.25314 | 1 | -1.48747 | 13.4884  | 4.56757   | Down |
| NM_019545      | Hao2          | -1.25241 | 1 | -2.84962 | 1.29693  | 0.140629  | Down |
| NM_177546      | Pcyt1b        | -1.25241 | 1 | -2.84962 | 0.544476 | 0.0590386 | Down |
| NM_001163487   | Pfkm          | -1.25233 | 1 | -1.58396 | 9.94576  | 3.14086   | Down |
| NM_172288      | Nup133        | -1.25116 | 1 | -1.46505 | 11.3875  | 3.91834   | Down |
| NM_010722      | Lmnb2         | -1.25065 | 1 | -1.51175 | 13.3762  | 4.451     | Down |
| NM_030046      | Dnajc21       | -1.24927 | 1 | -1.47992 | 27.8364  | 9.47655   | Down |
| NM_033602      | Peli2         | -1.24725 | 1 | -1.53861 | 6.24365  | 2.03749   | Down |
| NM_029858      | Ston1         | -1.2456  | 1 | -1.75799 | 4.25213  | 1.17927   | Down |
| NM_172385      | Zfp536        | -1.24468 | 1 | -2.00162 | 1.42198  | 0.325509  | Down |
| NM_175530      | Fbxo46        | -1.24449 | 1 | -1.62311 | 7.50576  | 2.30255   | Down |
| NM_133975      | Trip12        | -1.24421 | 1 | -1.29754 | 104.076  | 40.3004   | Down |
| NM_153144      | Ggnbp2        | -1.24317 | 1 | -1.3508  | 85.0018  | 31.7097   | Down |
| NR_038047      | D130020L05Rik | -1.24268 | 1 | -1.71396 | 5.19877  | 1.49038   | Down |
| NM_029337      | Ep400         | -1.24225 | 1 | -1.34957 | 23.345   | 8.71624   | Down |
| NM_009054      | Trim27        | -1.2395  | 1 | -1.44922 | 29.5667  | 10.2869   | Down |
| NM_145744      | Dusp15        | -1.23733 | 1 | -1.75008 | 23.4469  | 6.53858   | Down |
| NM_001195004   | Myst2         | -1.23596 | 1 | -1.3813  | 23.6263  | 8.62567   | Down |
| NM_001205306_2 | Gm3383        | -1.23486 | 1 | -1.9625  | 8.57759  | 2.02487   | Down |
| NM_012055      | Asns          | -1.23232 | 1 | -1.41079 | 48.2462  | 17.2492   | Down |
| NM_001166669   | Gemin5        | -1.2312  | 1 | -1.4164  | 13.9184  | 4.95628   | Down |
| NM_183020      | Atxn2l        | -1.23034 | 1 | -1.39383 | 29.6167  | 10.7165   | Down |
| NM_001135728   | Sh3kbp1       | -1.23023 | 1 | -1.83368 | 2.24115  | 0.585767  | Down |
| NM_011129      | Sept4         | -1.22906 | 1 | -1.68705 | 9.45711  | 2.76457   | Down |
| NM_001039578   | Evi5l         | -1.22859 | 1 | -1.69687 | 9.62685  | 2.79342   | Down |
| NM_001146012   | R3hcc1        | -1.22836 | 1 | -1.53264 | 19.312   | 6.32593   | Down |
| NM_010098      | Opn3          | -1.22766 | 1 | -1.98568 | 3.6062   | 0.834779  | Down |
| NM_028820      | 1700017B05Rik | -1.22691 | 1 | -1.50783 | 7.85352  | 2.61905   | Down |
| NM_146009      | Cep290        | -1.22591 | 1 | -1.42066 | 9.77581  | 3.47029   | Down |
| NM_001159591   | Csnk1g2       | -1.22505 | 1 | -1.36078 | 69.8472  | 25.8689   | Down |
| NR_002891_2    | Gm5512        | -1.2249  | 1 | -1.47975 | 26.5667  | 9.04034   | Down |
| NM_172593      | Mier3         | -1.22365 | 1 | -1.40339 | 17.3011  | 6.21726   | Down |
| NM_153791      | Flywch1       | -1.22143 | 1 | -1.40764 | 33.9437  | 12.1607   | Down |
| NR_027369      | C87436        | -1.22135 | 1 | -1.5062  | 15.5513  | 5.1915    | Down |
| NM_001033436   | Atxn7l1       | -1.22076 | 1 | -1.73904 | 4.77832  | 1.34241   | Down |
| NM_027430      | Brp44         | -1.21982 | 1 | -1.48784 | 49.4542  | 16.7288   | Down |
| NM_019729      | Usp8          | -1.21946 | 1 | -1.35519 | 38.1958  | 14.2014   | Down |
| NM_026169      | Frmf8         | -1.21917 | 1 | -1.53363 | 9.83978  | 3.21994   | Down |
| NM_133685      | Rab31         | -1.21828 | 1 | -1.47111 | 13.5737  | 4.647     | Down |
| NM_201361      | Fam82a1       | -1.21779 | 1 | -1.81425 | 5.25984  | 1.39439   | Down |
| NM_001025444   | Aptx          | -1.21719 | 1 | -1.42121 | 12.8405  | 4.55569   | Down |
| NM_178246      | Smg5          | -1.21455 | 1 | -1.38796 | 21.9093  | 7.95884   | Down |
| NM_020266      | Dnajb2        | -1.21424 | 1 | -1.46097 | 26.4288  | 9.11326   | Down |
| NM_010115      | Egfbp2        | -1.2114  | 1 | -2.30118 | 5.04673  | 0.907702  | Down |
| NM_010644      | Klk1b26       | -1.2114  | 1 | -2.30118 | 5.02939  | 0.904583  | Down |
| NM_207206      | Lpcat4        | -1.2114  | 1 | -2.30118 | 2.30844  | 0.415195  | Down |
| NM_008922      | Prim2         | -1.21106 | 1 | -1.60662 | 10.3982  | 3.22448   | Down |
| NM_001198998   | Vdac3         | -1.21061 | 1 | -1.37966 | 71.7989  | 26.2342   | Down |
| NM_001081172   | Frmf1         | -1.21046 | 1 | -2.81214 | 0.535877 | 0.0596766 | Down |
| NM_025451      | Camk2n1       | -1.20907 | 1 | -1.54078 | 7.75438  | 2.52351   | Down |
| NM_001024624   | Cdkl5         | -1.20893 | 1 | -1.63257 | 5.45348  | 1.65876   | Down |
| NM_001047436   | Pard6a        | -1.20832 | 1 | -1.63461 | 13.7307  | 4.16996   | Down |
| NM_026225      | Cog6          | -1.20665 | 1 | -1.33583 | 58.9765  | 22.2257   | Down |
| NM_009622      | Adcy1         | -1.20539 | 1 | -2.02    | 0.44347  | 0.0995633 | Down |
| NM_026892      | Eif1b         | -1.20438 | 1 | -1.52138 | 33.2124  | 10.9605   | Down |
| NM_198622      | H1fx          | -1.20381 | 1 | -2.51841 | 4.00308  | 0.608398  | Down |
| NM_152801      | Arhgef6       | -1.20363 | 1 | -1.51247 | 7.00133  | 2.32547   | Down |
| NM_178149      | Pik3ip1       | -1.20289 | 1 | -1.4489  | 21.9985  | 7.6496    | Down |
| NM_010852      | Myef2         | -1.20084 | 1 | -1.40717 | 23.0528  | 8.25871   | Down |
| NM_175238      | Rif1          | -1.20012 | 1 | -1.31699 | 24.5671  | 9.3813    | Down |

|              |               |          |   |          |          |           |      |
|--------------|---------------|----------|---|----------|----------|-----------|------|
| NM_001122675 | Zcchc2        | -1.19984 | 1 | -1.40504 | 10.4838  | 3.76145   | Down |
| NM_053122    | Immp2l        | -1.19971 | 1 | -1.91589 | 5.90412  | 1.44209   | Down |
| NM_010027    | Ddt           | -1.19922 | 1 | -1.42391 | 96.2426  | 34.0683   | Down |
| NM_134155    | Brms1         | -1.19922 | 1 | -1.54845 | 18.9077  | 6.11672   | Down |
| NM_177204    | Fam40b        | -1.19913 | 1 | -1.67593 | 2.63507  | 0.77554   | Down |
| NM_001033159 | Zfp597        | -1.19868 | 1 | -1.41595 | 11.1038  | 3.95297   | Down |
| NM_001034899 | Gm16432       | -1.19691 | 1 | -1.97361 | 3.52027  | 0.820222  | Down |
| NM_001170711 | Asb8          | -1.1951  | 1 | -1.43468 | 23.7648  | 8.34702   | Down |
| NM_001037134 | Ccne2         | -1.19457 | 1 | -1.58061 | 6.93922  | 2.19209   | Down |
| NR_027953    | Trmt61b       | -1.19428 | 1 | -1.65706 | 23.4133  | 6.9875    | Down |
| NM_176987    | 4732471D19Rik | -1.19381 | 1 | -1.45933 | 8.85521  | 3.05557   | Down |
| NM_001081074 | A1cf          | -1.19155 | 1 | -2.88615 | 0.564389 | 0.0562625 | Down |
| NM_007511    | Atp7b         | -1.19016 | 1 | -2.54911 | 0.828445 | 0.121912  | Down |
| NM_026350    | Ccdc130       | -1.18788 | 1 | -1.52399 | 12.8827  | 4.24111   | Down |
| NM_001081268 | Prss53        | -1.18786 | 1 | -1.60473 | 7.13175  | 2.21244   | Down |
| NM_010716    | Lig3          | -1.18773 | 1 | -1.35019 | 18.3581  | 6.84701   | Down |
| NM_001195298 | Kifc1         | -1.18746 | 1 | -2.38091 | 1.83087  | 0.309177  | Down |
| NM_023502    | Eif2          | -1.187   | 1 | -1.33572 | 48.4152  | 18.2428   | Down |
| NM_146150    | Nrd1          | -1.187   | 1 | -1.32916 | 34.0497  | 12.8895   | Down |
| NM_173028    | Vps13a        | -1.18696 | 1 | -1.27525 | 36.5375  | 14.3655   | Down |
| NM_001011800 | Olftr212      | -1.18639 | 1 | -4.13407 | 0.469488 | 0         | Down |
| NM_001038701 | Gabrb3        | -1.18639 | 1 | -4.13407 | 0.228127 | 0         | Down |
| NM_001085513 | Fam131c       | -1.18639 | 1 | -4.13407 | 0.875417 | 0         | Down |
| NM_001085535 | Cldn27        | -1.18639 | 1 | -4.13407 | 0.689271 | 0         | Down |
| NM_001162954 | Gm8267        | -1.18639 | 1 | -3.13407 | 1.01167  | 0.0578959 | Down |
| NM_001199224 | Agbl1         | -1.18639 | 1 | -4.13407 | 0.372358 | 0         | Down |
| NM_011686    | Vmn2r88       | -1.18639 | 1 | -4.13407 | 0.487363 | 0         | Down |
| NM_019494    | Cxcl11        | -1.18639 | 1 | -4.13407 | 0.791466 | 0         | Down |
| NM_020504    | Cldn13        | -1.18639 | 1 | -3.13407 | 1.1724   | 0.0670944 | Down |
| NM_021489    | F12           | -1.18639 | 1 | -4.13407 | 0.639711 | 0         | Down |
| NM_027979    | Chit1         | -1.18639 | 1 | -4.13407 | 0.733181 | 0         | Down |
| NM_146393    | Olftr1279     | -1.18639 | 1 | -4.13407 | 1.33171  | 0         | Down |
| NM_172378    | BC026439      | -1.18639 | 1 | -3.13407 | 0.529761 | 0.0303171 | Down |
| NM_198958    | Nox3          | -1.18639 | 1 | -4.13407 | 0.700041 | 0         | Down |
| NR_027836    | D730001G18Rik | -1.18639 | 1 | -4.13407 | 0.786997 | 0         | Down |
| NM_029210    | Sv2c          | -1.18638 | 1 | -2.27846 | 1.01622  | 0.185725  | Down |
| NM_133692    | Pold3         | -1.1848  | 1 | -1.38031 | 25.3513  | 9.25487   | Down |
| NM_153177    | Eif2c4        | -1.18398 | 1 | -1.4974  | 4.72386  | 1.58532   | Down |
| NM_026898    | Wdr53         | -1.1839  | 1 | -1.51516 | 19.898   | 6.592     | Down |
| NM_026314    | Dyx1c1        | -1.18363 | 1 | -1.76061 | 5.00323  | 1.3792    | Down |
| NM_025926    | Dnajb4        | -1.18324 | 1 | -1.34746 | 43.3104  | 16.1836   | Down |
| NM_001112721 | Ubr5          | -1.18192 | 1 | -1.24102 | 81.1682  | 32.685    | Down |
| NM_001168471 | Dynll2        | -1.1815  | 1 | -1.34029 | 50.1052  | 18.8175   | Down |
| NM_145480    | Rfc4          | -1.17958 | 1 | -1.56615 | 17.022   | 5.43155   | Down |
| NM_033607    | Uchl4         | -1.17932 | 1 | -1.54128 | 20.1522  | 6.54892   | Down |
| NM_001038624 | Ric3          | -1.17627 | 1 | -1.60921 | 3.17568  | 0.981384  | Down |
| NM_194339    | Bms1          | -1.17547 | 1 | -1.32207 | 30.897   | 11.7531   | Down |
| NM_028816    | Xpo6          | -1.17373 | 1 | -1.31488 | 32.013   | 12.2393   | Down |
| NM_008468    | Kpna6         | -1.17339 | 1 | -1.28635 | 38.5746  | 15.0471   | Down |
| NM_009097    | Rps6ka1       | -1.17248 | 1 | -1.50908 | 8.53383  | 2.83867   | Down |
| NM_007502    | Atp1b3        | -1.17212 | 1 | -1.28998 | 110.709  | 43.0746   | Down |
| NM_028279    | Naalad2       | -1.1684  | 1 | -1.55734 | 7.56518  | 2.42862   | Down |
| NM_012024    | Ppp2r5e       | -1.16522 | 1 | -1.34335 | 18.7635  | 7.02984   | Down |
| NR_030698    | A630066F11Rik | -1.16455 | 1 | -1.61246 | 12.4591  | 3.83878   | Down |
| NM_133248    | Glmn          | -1.16386 | 1 | -1.56114 | 9.68438  | 3.09966   | Down |
| NM_028963    | 4933427D14Rik | -1.16304 | 1 | -1.39196 | 12.8221  | 4.64023   | Down |
| NM_177431    | Adamts20      | -1.16271 | 1 | -2.6935  | 0.466973 | 0.0586623 | Down |
| NM_001039586 | Glyctk        | -1.16227 | 1 | -1.58514 | 4.24292  | 1.33401   | Down |
| NM_007550    | Blm           | -1.16205 | 1 | -1.47111 | 6.42681  | 2.19693   | Down |
| NM_172861    | Slc7a14       | -1.16154 | 1 | -2.35745 | 0.473029 | 0.0812115 | Down |
| NM_008403    | Itgb1bp1      | -1.15792 | 1 | -1.35745 | 38.5282  | 14.2832   | Down |
| NM_027435    | Atad2         | -1.1544  | 1 | -1.37932 | 10.0683  | 3.67608   | Down |
| NM_001042743 | Mast2         | -1.15419 | 1 | -1.34247 | 14.0871  | 5.28022   | Down |
| NM_001128597 | Gpank1        | -1.153   | 1 | -1.49022 | 17.5389  | 5.91108   | Down |
| NM_001190179 | Nup35         | -1.15294 | 1 | -1.50958 | 8.63564  | 2.86955   | Down |
| NM_001199843 | 1700019E19Rik | -1.15208 | 1 | -1.72409 | 12.2329  | 3.46088   | Down |
| NM_177412    | Tmcc1         | -1.15044 | 1 | -1.33223 | 15.0622  | 5.68654   | Down |
| NM_023516    | 2310016C08Rik | -1.14924 | 1 | -1.64394 | 13.0895  | 3.93575   | Down |
| NM_012018    | Cep110        | -1.14913 | 1 | -1.37055 | 7.72738  | 2.83882   | Down |
| NM_201232    | Nipbl         | -1.14853 | 1 | -1.22729 | 51.4491  | 20.9136   | Down |
| NM_144935    | BC018242      | -1.14802 | 1 | -1.78993 | 3.07312  | 0.825816  | Down |
| NM_177078    | Adrbk2        | -1.14762 | 1 | -1.36561 | 9.26467  | 3.41548   | Down |
| NM_001037709 | Rusc2         | -1.14552 | 1 | -1.56653 | 3.27734  | 1.04399   | Down |
| NM_029005    | Mikl          | -1.1453  | 1 | -1.96415 | 3.07108  | 0.717066  | Down |
| NM_001162998 | 1110017F19Rik | -1.14499 | 1 | -2.01543 | 4.93212  | 1.10448   | Down |
| NM_001081323 | Mphosph9      | -1.14465 | 1 | -1.34522 | 8.63325  | 3.22911   | Down |



|              |               |          |   |          |          |           |      |
|--------------|---------------|----------|---|----------|----------|-----------|------|
| NM_001029934 | Usp32         | -1.14332 | 1 | -1.25842 | 30.2164  | 12.017    | Down |
| NM_013853    | Abcf2         | -1.14302 | 1 | -1.27879 | 58.8584  | 23.0747   | Down |
| NM_001160019 | Tor1aip1      | -1.14126 | 1 | -1.26706 | 47.2622  | 18.6819   | Down |
| NM_178655    | Ank2          | -1.14124 | 1 | -1.33128 | 13.6366  | 5.15103   | Down |
| NM_026718    | Ankrd13a      | -1.14086 | 1 | -1.31043 | 30.1746  | 11.5678   | Down |
| NM_177606    | Plekhh2       | -1.14078 | 1 | -1.46077 | 4.21032  | 1.44916   | Down |
| NM_023129    | Pln           | -1.14047 | 1 | -1.71968 | 4.08739  | 1.1594    | Down |
| NM_172713    | Sdad1         | -1.14016 | 1 | -1.32156 | 17.1456  | 6.52125   | Down |
| NM_001037143 | 2310033E01Rik | -1.13977 | 1 | -2.84034 | 2.86409  | 0.295031  | Down |
| NM_001177951 | Rpgr          | -1.13801 | 1 | -1.43071 | 10.759   | 3.7844    | Down |
| NM_052994    | Spock2        | -1.13761 | 1 | -1.3924  | 11.4108  | 4.12592   | Down |
| NM_019726    | Gps2          | -1.13666 | 1 | -1.50834 | 17.8802  | 5.94335   | Down |
| NM_199042    | Thap1         | -1.13605 | 1 | -1.58824 | 6.67109  | 2.09008   | Down |
| NM_027411    | Ccdc99        | -1.13578 | 1 | -1.76061 | 3.33193  | 0.915263  | Down |
| NM_011160    | Prkg1         | -1.13565 | 1 | -1.60437 | 4.97982  | 1.54145   | Down |
| NM_177640    | D030056L22Rik | -1.13531 | 1 | -1.39867 | 25.6808  | 9.24347   | Down |
| NM_145579    | Mypop         | -1.13487 | 1 | -1.8422  | 3.0761   | 0.792176  | Down |
| NM_025699    | 3230401D17Rik | -1.13482 | 1 | -1.32543 | 49.9273  | 18.9359   | Down |
| NM_177049    | Jph4          | -1.13363 | 1 | -2.94504 | 0.372606 | 0.0319853 | Down |
| NM_001164059 | Sell          | -1.13313 | 1 | -2.60235 | 1.41716  | 0.194643  | Down |
| NM_182840    | Emilin3       | -1.13301 | 1 | -2.49758 | 1.06101  | 0.161919  | Down |
| NM_029025    | Tmem81        | -1.13229 | 1 | -1.57852 | 8.88165  | 2.8024    | Down |
| NM_017470    | Dnalc4        | -1.13164 | 1 | -1.42048 | 23.7504  | 8.41452   | Down |
| NM_134141    | Ciapi1        | -1.12804 | 1 | -1.38865 | 9.84336  | 3.56797   | Down |
| NM_138744    | Ssx2ip        | -1.12717 | 1 | -1.28365 | 33.5734  | 13.1144   | Down |
| NM_001146022 | Wdfy4         | -1.12682 | 1 | -1.45988 | 2.75719  | 0.949204  | Down |
| NM_001164369 | Bcas1         | -1.12466 | 1 | -2.44686 | 1.36931  | 0.218875  | Down |
| NM_001100187 | Gm9705        | -1.12373 | 1 | -2.65873 | 1.05515  | 0.135865  | Down |
| NM_145450    | BC022687      | -1.12362 | 1 | -1.47111 | 12.8468  | 4.38618   | Down |
| NM_007458    | Ap2a1         | -1.12235 | 1 | -1.27781 | 33.4397  | 13.1155   | Down |
| NM_001161824 | Mtx1          | -1.12227 | 1 | -1.33375 | 41.7515  | 15.7552   | Down |
| NM_022028    | Sav1          | -1.12112 | 1 | -1.35217 | 21.1785  | 7.8788    | Down |
| NM_008801    | Pde6d         | -1.11955 | 1 | -1.52725 | 16.6574  | 5.45664   | Down |
| NM_011818    | Gmcl1         | -1.1168  | 1 | -1.29881 | 28.7152  | 11.0954   | Down |
| NM_001164359 | Erlin1        | -1.11643 | 1 | -1.37067 | 13.7487  | 5.04693   | Down |
| NM_178686    | Cep120        | -1.11565 | 1 | -1.27394 | 24.3328  | 9.56898   | Down |
| NM_001112705 | Tlk2          | -1.1138  | 1 | -1.32188 | 11.9019  | 4.52381   | Down |
| NM_024199    | Cstf1         | -1.11367 | 1 | -1.38001 | 22.2864  | 8.12579   | Down |
| NM_028024    | Nkiras2       | -1.11306 | 1 | -1.33634 | 28.2511  | 10.6278   | Down |
| NM_198608    | Aars2         | -1.10994 | 1 | -1.60235 | 3.80824  | 1.17901   | Down |
| NM_007590    | Calm3         | -1.10991 | 1 | -1.20974 | 123.288  | 50.7219   | Down |
| NM_175749    | Nup153        | -1.10981 | 1 | -1.20381 | 50.8836  | 21.021    | Down |
| NM_008786    | Pcmt1         | -1.10761 | 1 | -1.26502 | 58.2047  | 23.0315   | Down |
| NM_172935    | Amdhd2        | -1.10616 | 1 | -1.39494 | 23.6756  | 8.53837   | Down |
| NM_133435    | Nmnat1        | -1.10483 | 1 | -1.77923 | 7.5245   | 2.03182   | Down |
| NM_009879    | Ift81         | -1.10465 | 1 | -1.27177 | 33.618   | 13.2387   | Down |
| NM_198659    | B930007M17Rik | -1.10401 | 1 | -1.78947 | 2.47313  | 0.662372  | Down |
| NM_183097    | 1700067K01Rik | -1.10357 | 1 | -2.47111 | 3.4075   | 0.529823  | Down |
| NM_001163627 | Fam151b       | -1.10224 | 1 | -1.7049  | 6.34947  | 1.81684   | Down |
| NM_146074    | Tfb1m         | -1.10092 | 1 | -1.42772 | 20.4795  | 7.21139   | Down |
| NM_016764    | Prdx4         | -1.10078 | 1 | -1.30118 | 71.4085  | 27.5383   | Down |
| NM_018855    | Gas8          | -1.09958 | 1 | -1.45805 | 13.6482  | 4.7006    | Down |
| NM_145425    | Wdpcp         | -1.09856 | 1 | -1.49209 | 7.87362  | 2.64478   | Down |
| NM_013684    | Tbp           | -1.09837 | 1 | -1.35745 | 23.0418  | 8.53541   | Down |
| NM_026418    | Rgs10         | -1.09766 | 1 | -1.58275 | 14.8944  | 4.67667   | Down |
| NR_033560    | 9230115E21Rik | -1.09765 | 1 | -2.57064 | 2.06637  | 0.29026   | Down |
| NM_001081087 | Kbtbd10       | -1.0973  | 1 | -2.4222  | 1.56521  | 0.254578  | Down |
| NM_013832    | Rasal1        | -1.0973  | 1 | -2.4222  | 1.23831  | 0.201409  | Down |
| NM_001167730 | Rad18         | -1.09659 | 1 | -1.36035 | 15.172   | 5.60825   | Down |
| NM_001004761 | Gpr158        | -1.09618 | 1 | -4.05607 | 0.165912 | 0         | Down |
| NM_001012623 | Rims1         | -1.09618 | 1 | -3.05607 | 0.311866 | 0.0188973 | Down |
| NM_001025607 | Gm5168        | -1.09618 | 1 | -4.05607 | 1.43784  | 0         | Down |
| NM_001042502 | Pitx2         | -1.09618 | 1 | -4.05607 | 0.513336 | 0         | Down |
| NM_001081257 | Hpse2         | -1.09618 | 1 | -4.05607 | 0.555974 | 0         | Down |
| NM_001126317 | Gm1140        | -1.09618 | 1 | -4.05607 | 1.51506  | 0         | Down |
| NM_001163175 | Begain        | -1.09618 | 1 | -3.05607 | 0.436866 | 0.0264716 | Down |
| NM_008751    | Nxph1         | -1.09618 | 1 | -3.05607 | 0.664487 | 0.0402641 | Down |
| NM_008780    | Pax1          | -1.09618 | 1 | -4.05607 | 0.449121 | 0         | Down |
| NM_020596    | Egr4          | -1.09618 | 1 | -4.05607 | 0.564181 | 0         | Down |
| NM_021406    | Trem1         | -1.09618 | 1 | -3.05607 | 0.39427  | 0.0238905 | Down |
| NM_026841    | 1110059M19Rik | -1.09618 | 1 | -4.05607 | 1.06833  | 0         | Down |
| NM_027928    | Chst13        | -1.09618 | 1 | -3.05607 | 0.717614 | 0.0434833 | Down |
| NM_029352    | Dusp9         | -1.09618 | 1 | -4.05607 | 0.438807 | 0         | Down |
| NM_031174    | Dscam         | -1.09618 | 1 | -4.05607 | 0.158393 | 0         | Down |
| NM_146890    | Olf126        | -1.09618 | 1 | -4.05607 | 1.23415  | 0         | Down |
| NM_172948    | Mgat5b        | -1.09618 | 1 | -4.05607 | 0.27851  | 0         | Down |

|              |               |          |   |          |          |           |      |
|--------------|---------------|----------|---|----------|----------|-----------|------|
| NM_173783    | Mageb18       | -1.09618 | 1 | -4.05607 | 0.548509 | 0         | Down |
| NM_175210    | Abca12        | -1.09618 | 1 | -4.05607 | 0.14235  | 0         | Down |
| NM_175642    | Bai3          | -1.09618 | 1 | -3.05607 | 0.214556 | 0.0130009 | Down |
| NR_027959    | B830017H08Rik | -1.09618 | 1 | -3.05607 | 1.05878  | 0.0641564 | Down |
| NR_036606    | 1700060C20Rik | -1.09618 | 1 | -3.05607 | 2.0081   | 0.12168   | Down |
| NM_138653    | Bspry         | -1.09524 | 1 | -1.27861 | 47.3016  | 18.5347   | Down |
| NM_028627    | Psd           | -1.09262 | 1 | -1.49912 | 4.62833  | 1.54627   | Down |
| NM_145549    | Efcab7        | -1.09168 | 1 | -1.62618 | 5.97696  | 1.81549   | Down |
| NM_025837    | Mpi           | -1.09044 | 1 | -1.23186 | 77.5864  | 31.4213   | Down |
| NM_001110315 | Kif1a         | -1.0884  | 1 | -1.50673 | 2.07394  | 0.688872  | Down |
| NM_001033142 | Rnf166        | -1.08801 | 1 | -1.32144 | 28.9247  | 10.9921   | Down |
| NM_001036684 | Atp2b2        | -1.0861  | 1 | -2.79304 | 0.2927   | 0.0311909 | Down |
| NM_001136060 | Dpp6          | -1.0861  | 1 | -2.79304 | 0.446059 | 0.0475332 | Down |
| NM_001163702 | Fbxo27        | -1.0861  | 1 | -2.79304 | 1.03646  | 0.110448  | Down |
| NM_001164491 | Ablim3        | -1.08369 | 1 | -2.62311 | 0.644846 | 0.0851613 | Down |
| NM_031379    | Tkt1          | -1.08369 | 1 | -2.62311 | 1.09997  | 0.145267  | Down |
| NM_054093    | Ube3b         | -1.08303 | 1 | -1.29473 | 11.9623  | 4.63301   | Down |
| NM_145128    | Mgat5         | -1.08244 | 1 | -1.67164 | 2.91884  | 0.855756  | Down |
| NM_009391    | Ran           | -1.08221 | 1 | -1.20446 | 78.8919  | 32.5695   | Down |
| NR_015614    | E230029C05Rik | -1.08181 | 1 | -2.18383 | 1.65596  | 0.323515  | Down |
| NM_008279    | Map4k1        | -1.08091 | 1 | -2.28469 | 1.47239  | 0.26609   | Down |
| NM_027975    | Fam83d        | -1.08091 | 1 | -2.28469 | 1.75774  | 0.317659  | Down |
| NM_026626    | Efcab2        | -1.08049 | 1 | -1.46126 | 7.9908   | 2.74378   | Down |
| NM_001163276 | Med16         | -1.07882 | 1 | -1.33955 | 12.9197  | 4.84561   | Down |
| NM_001085393 | Spaca5        | -1.07685 | 1 | -2.6935  | 3.70244  | 0.448694  | Down |
| NM_026235    | Larp6         | -1.07685 | 1 | -2.6935  | 1.02667  | 0.124421  | Down |
| NR_027643    | 4932435O22Rik | -1.07685 | 1 | -2.6935  | 0.69652  | 0.0844103 | Down |
| NM_172509    | Kctd7         | -1.07674 | 1 | -1.38641 | 7.0085   | 2.54112   | Down |
| NM_016684    | Zscan12       | -1.07641 | 1 | -1.34687 | 8.755    | 3.26618   | Down |
| NM_172723    | Adap1         | -1.07635 | 1 | -1.95223 | 1.91735  | 0.448881  | Down |
| NM_175195    | 3110056O03Rik | -1.07563 | 1 | -1.4396  | 7.67618  | 2.67746   | Down |
| NM_026073    | Rabl5         | -1.07463 | 1 | -1.42517 | 25.934   | 9.14133   | Down |
| NM_001039184 | Cep350        | -1.07368 | 1 | -1.15806 | 27.983   | 11.9337   | Down |
| NM_010229    | Flt3          | -1.07353 | 1 | -2.44414 | 0.990985 | 0.157049  | Down |
| NM_177780    | Dock5         | -1.07125 | 1 | -1.46581 | 1.82746  | 0.625175  | Down |
| NM_009817    | Cast          | -1.06825 | 1 | -1.19696 | 56.0144  | 23.244    | Down |
| NM_023043    | Prnd          | -1.06766 | 1 | -1.30888 | 15.0925  | 5.78486   | Down |
| NM_011732    | Ybx1          | -1.06715 | 1 | -1.15884 | 143.839  | 61.3058   | Down |
| NM_145553    | Fam76a        | -1.06646 | 1 | -1.2359  | 31.117   | 12.5622   | Down |
| NM_001033215 | Zfp957        | -1.06625 | 1 | -2.88615 | 0.582675 | 0.0521926 | Down |
| NM_007702    | Cidea         | -1.06625 | 1 | -2.88615 | 1.37709  | 0.123352  | Down |
| NM_009137    | Ccl22         | -1.06625 | 1 | -2.88615 | 0.885112 | 0.0792832 | Down |
| NM_138646    | Hps4          | -1.06576 | 1 | -1.47111 | 6.29342  | 2.14414   | Down |
| NM_001112701 | Cyth2         | -1.06467 | 1 | -1.26154 | 28.0539  | 11.1213   | Down |
| NM_019715    | Kcmf1         | -1.06328 | 1 | -1.22278 | 32.7349  | 13.338    | Down |
| NM_001168672 | Gtse1         | -1.06267 | 1 | -1.86704 | 1.89466  | 0.474738  | Down |
| NM_011643    | Trpc1         | -1.06111 | 1 | -1.88615 | 1.64283  | 0.405195  | Down |
| NM_028126    | Strada        | -1.05823 | 1 | -1.30874 | 22.032   | 8.4439    | Down |
| NM_013691    | Thbs3         | -1.05594 | 1 | -1.62663 | 2.97777  | 0.90218   | Down |
| NM_176976    | 5830418K08Rik | -1.05514 | 1 | -1.21741 | 13.9083  | 5.68796   | Down |
| NM_173402    | Rgs12         | -1.05484 | 1 | -1.31064 | 7.78899  | 2.98089   | Down |
| NM_001033532 | AW554918      | -1.05468 | 1 | -1.28297 | 9.89846  | 3.86391   | Down |
| NM_022816    | Acot10        | -1.05448 | 1 | -1.34633 | 21.5382  | 8.03386   | Down |
| NM_027481    | Sugp1         | -1.05448 | 1 | -1.4208  | 9.41632  | 3.32743   | Down |
| NM_001081756 | Nckap5        | -1.05445 | 1 | -2.15916 | 0.550741 | 0.109483  | Down |
| NM_011015    | Orc1          | -1.05302 | 1 | -2.2596  | 1.29575  | 0.23835   | Down |
| NM_008787    | Pcnt          | -1.05131 | 1 | -1.22568 | 9.33871  | 3.79671   | Down |
| NM_001081435 | Fbxo47        | -1.05123 | 1 | -1.77692 | 3.64841  | 0.982268  | Down |
| NM_009920    | Cnih2         | -1.05123 | 1 | -1.77692 | 4.95795  | 1.33484   | Down |
| NM_029794    | Cpsf4l        | -1.04991 | 1 | -1.47734 | 13.0251  | 4.41433   | Down |
| NM_133948    | Psip1         | -1.04954 | 1 | -1.15514 | 74.4253  | 31.7993   | Down |
| NM_028426    | 3110007F17Rik | -1.04889 | 1 | -2.47111 | 3.5604   | 0.546236  | Down |
| NM_028284    | Bbs5          | -1.04506 | 1 | -1.50763 | 9.77371  | 3.23793   | Down |
| NM_028479    | 1600027N09Rik | -1.04476 | 1 | -1.61606 | 7.89308  | 2.40909   | Down |
| NM_001081446 | lqck          | -1.04397 | 1 | -1.64248 | 4.26551  | 1.27565   | Down |
| NR_029438    | 4933406l18Rik | -1.04252 | 1 | -2.58658 | 2.53429  | 0.343497  | Down |
| NM_133922    | Krba1         | -1.04194 | 1 | -1.2777  | 7.06381  | 2.7671    | Down |
| NM_029341    | Capsl         | -1.04177 | 1 | -1.84767 | 5.378    | 1.366     | Down |
| NM_025968    | Ptgr1         | -1.04113 | 1 | -1.51765 | 6.22732  | 2.04727   | Down |
| NM_024250    | Phf10         | -1.04007 | 1 | -1.22311 | 49.2451  | 20.0541   | Down |
| NM_028634    | Cby1          | -1.03948 | 1 | -1.40007 | 19.6809  | 7.0572    | Down |
| NM_153424    | Nphp4         | -1.03928 | 1 | -1.86597 | 0.970268 | 0.24273   | Down |
| NM_001005223 | Znhit3        | -1.03884 | 1 | -1.37236 | 25.9487  | 9.49423   | Down |
| NM_011664    | Ubb           | -1.03775 | 1 | -1.07064 | 2030.73  | 920.342   | Down |
| NM_013744    | Zfp354b       | -1.03762 | 1 | -1.65168 | 3.29742  | 0.978706  | Down |
| NM_153505    | Nckap1l       | -1.03574 | 1 | -1.43794 | 3.79713  | 1.32411   | Down |

|              |               |           |   |          |          |           |           |
|--------------|---------------|-----------|---|----------|----------|-----------|-----------|
| NM_176972    | Usp37         | -1.03554  | 1 | -1.18506 | 16.5516  | 6.9237    | Down      |
| NM_025734    | Kcng4         | -1.03294  | 1 | -1.4928  | 3.66227  | 1.22607   | Down      |
| NM_001039104 | Trpm1         | -1.03038  | 1 | -2.74413 | 0.342652 | 0.0378179 | Down      |
| NM_080560    | Ube2n         | -1.03031  | 1 | -1.15833 | 41.7687  | 17.8033   | Down      |
| NM_001081170 | Pacs2         | -1.02853  | 1 | -1.273   | 8.36824  | 3.28824   | Down      |
| NM_027930    | Fam54a        | -1.02658  | 1 | -2.13407 | 1.69172  | 0.342306  | Down      |
| NM_001113423 | Slain2        | -1.02635  | 1 | -1.1649  | 28.5482  | 12.1117   | Down      |
| NM_177790    | Zfp385c       | -1.02628  | 1 | -1.27081 | 11.1952  | 4.40575   | Down      |
| NM_026101    | Herc4         | -1.02572  | 1 | -1.2464  | 13.8727  | 5.55536   | Down      |
| NM_029626    | Glt8d1        | -1.02566  | 1 | -1.22708 | 26.7554  | 10.8625   | Down      |
| NM_177758    | Zscan20       | -1.02522  | 1 | -1.38942 | 3.9958   | 1.4433    | Down      |
| NM_001159497 | Ppm1b         | -1.02509  | 1 | -1.20745 | 50.6062  | 20.8338   | Down      |
| NM_201385    | Plec          | -1.02468  | 1 | -1.11787 | 20.1348  | 8.8289    | Down      |
| NM_001033877 | Adamts17      | -1.02459  | 1 | -2.23407 | 0.635779 | 0.119076  | Down      |
| NM_022979    | Nup98         | -1.02388  | 1 | -1.12251 | 65.995   | 28.844    | Down      |
| NM_145824    | Ranbp10       | -1.0231   | 1 | -1.25932 | 9.20398  | 3.65176   | Down      |
| NM_001033474 | Atxn7l3b      | -1.02281  | 1 | -1.1267  | 67.0594  | 29.2231   | Down      |
| NM_027014    | Gins1         | -1.02174  | 1 | -1.98568 | 3.78278  | 0.858586  | Down      |
| NM_013881    | Ulk2          | -1.02119  | 1 | -1.15874 | 23.9423  | 10.2012   | Down      |
| NM_172124    | B3gat2        | -1.02102  | 1 | -1.26294 | 10.706   | 4.23657   | Down      |
| NM_027460    | Slc25a33      | -1.01874  | 1 | -1.36982 | 12.2158  | 4.47498   | Down      |
| NM_021493    | Arhgap23      | -1.01873  | 1 | -1.56226 | 1.867    | 0.592769  | Down      |
| NM_178708    | Pcid2         | -1.01849  | 1 | -1.30516 | 13.9791  | 5.36643   | Down      |
| NM_199447    | Rrp12         | -1.01819  | 1 | -1.30118 | 7.98565  | 3.07438   | Down      |
| NM_029716    | Chn1          | -1.01808  | 1 | -1.28637 | 11.7477  | 4.57113   | Down      |
| NM_027884    | Tns1          | -1.01715  | 1 | -1.13401 | 19.175   | 8.31294   | Down      |
| NM_178869    | Tll1          | -1.01659  | 1 | -1.44035 | 7.76233  | 2.69995   | Down      |
| NM_001110506 | BC060267      | -1.01647  | 1 | -1.34955 | 9.91711  | 3.68664   | Down      |
| NM_013559    | Hsp1          | -1.01602  | 1 | -1.26511 | 12.6441  | 4.99523   | Down      |
| NM_207530    | Osbpl1a       | -1.01534  | 1 | -1.20738 | 23.2459  | 9.56906   | Down      |
| NM_176848    | Fbxo2         | -1.01484  | 1 | -2.44073 | 2.59795  | 0.407242  | Down      |
| NM_172903    | Man2a2        | -1.01438  | 1 | -1.2237  | 9.36825  | 3.81191   | Down      |
| NM_001159647 | Cntn1         | -1.0128   | 1 | -1.7549  | 0.994415 | 0.271515  | Down      |
| NM_011496    | Aurkb         | -1.01152  | 1 | -2.38865 | 1.78061  | 0.293474  | Down      |
| NM_025735    | Map1lc3a      | -1.00846  | 1 | -1.19675 | 77.8539  | 32.2873   | Down      |
| NM_023651    | Pex13         | -1.00721  | 1 | -1.16625 | 25.2768  | 10.7112   | Down      |
| NM_172824    | Ccdc14        | -1.00701  | 1 | -1.38695 | 4.78534  | 1.73053   | Down      |
| NM_001100618 | Gm16378       | -1.00628  | 1 | -1.26666 | 57.777   | 22.7957   | Down      |
| NM_172692    | Gba2          | -1.00539  | 1 | -1.24163 | 13.702   | 5.50364   | Down      |
| NM_175034    | Slc24a5       | -1.00506  | 1 | -1.37647 | 10.5022  | 3.82689   | Down      |
| NM_029495    | Epsti1        | -1.00432  | 1 | -1.88615 | 2.3492   | 0.576172  | Down      |
| NM_008256    | Hmgcs2        | -1.00428  | 1 | -1.29214 | 10.071   | 3.90121   | Down      |
| NM_001039939 | Asxl1         | -1.00427  | 1 | -1.16336 | 15.5801  | 6.61544   | Down      |
| NR_015472    | 9530082P21Rik | -1.00424  | 1 | -1.23644 | 15.8253  | 6.37991   | Down      |
| NM_019468    | G6pd2         | -1.00349  | 1 | -1.40072 | 11.04    | 3.9518    | Down      |
| NM_026817    | Rabl2         | -1.00179  | 1 | -1.30452 | 18.2912  | 7.02208   | Down      |
| NM_001001804 | Ephx4         | -1.00006  | 1 | -2.97361 | 0.886397 | 0.0570675 | Down      |
| NM_001033214 | E330034G19Rik | -1.00006  | 1 | -3.97361 | 0.747377 | 0         | Down      |
| NM_001033229 | Cyp11b1       | -1.00006  | 1 | -3.97361 | 0.465007 | 0         | Down      |
| NM_001033768 | Pin1-ps1      | -1.00006  | 1 | -3.97361 | 1.02963  | 0         | Down      |
| NM_001048139 | Bdnf          | -1.00006  | 1 | -2.97361 | 0.267985 | 0.0172533 | Down      |
| NM_001081134 | Kcng1         | -1.00006  | 1 | -2.97361 | 0.481471 | 0.0309978 | Down      |
| NM_001142746 | Pcdh15        | -1.00006  | 1 | -2.97361 | 0.122201 | 0.0078675 | Down      |
| NM_001199311 | Gm17157       | -1.00006  | 1 | -3.97361 | 1.75328  | 0         | Down      |
| NM_009233    | Sox1          | -1.00006  | 1 | -3.97361 | 0.276217 | 0         | Down      |
| NM_009916    | Ccr4          | -1.00006  | 1 | -2.97361 | 0.400103 | 0.0257592 | Down      |
| NM_010487    | Elavl3        | -1.00006  | 1 | -2.97361 | 0.22182  | 0.0142811 | Down      |
| NM_011345    | Sele          | -1.00006  | 1 | -2.97361 | 0.382928 | 0.0246535 | Down      |
| NM_020016    | Magea2        | -1.00006  | 1 | -3.97361 | 0.661773 | 0         | Down      |
| NM_020018    | Magea5        | -1.00006  | 1 | -3.97361 | 0.713427 | 0         | Down      |
| NM_031493    | Xlr5c         | -1.00006  | 1 | -3.97361 | 2.06498  | 0         | Down      |
| NM_146255    | Slc1a7        | -1.00006  | 1 | -3.97361 | 0.371077 | 0         | Down      |
| NM_153598    | Ugt2b34       | -1.00006  | 1 | -3.97361 | 0.365842 | 0         | Down      |
| NM_173789    | Helt          | -1.00006  | 1 | -3.97361 | 0.727864 | 0         | Down      |
| NM_175424    | Prr9          | -1.00006  | 1 | -3.97361 | 0.942593 | 0         | Down      |
| NM_175628    | A2m           | -1.00006  | 1 | -2.97361 | 0.238726 | 0.0153695 | Down      |
| NM_183194    | Gsdmc3        | -1.00006  | 1 | -3.97361 | 0.520582 | 0         | Down      |
| NM_134013    | Psme4         | -0.998171 | 1 | -1.10457 | 35.3333  | 15.6353   | No change |
| NM_024284    | Hagh          | -0.996971 | 1 | -1.30346 | 24.6354  | 9.46363   | No change |
| NR_028592    | Gm10069       | -0.996777 | 1 | -1.37359 | 5.06438  | 1.84877   | No change |
| NM_178607    | Rnf24         | -0.996009 | 1 | -1.26308 | 6.85032  | 2.70909   | No change |
| NM_144813    | Slc24a1       | -0.995626 | 1 | -2.82474 | 0.294119 | 0.0275431 | No change |
| NM_010472    | Agfg1         | -0.99488  | 1 | -1.18077 | 24.3936  | 10.2297   | No change |
| NM_175026    | Pyhin1        | -0.994226 | 1 | -1.73762 | 1.63421  | 0.451645  | No change |
| NM_029522    | Gpsm2         | -0.992957 | 1 | -1.29247 | 8.77156  | 3.39608   | No change |
| NM_001039185 | Ceacam1       | -0.99195  | 1 | -1.55992 | 2.48104  | 0.787856  | No change |

|              |               |           |   |          |          |           |           |
|--------------|---------------|-----------|---|----------|----------|-----------|-----------|
| NM_008186    | Gtf2h1        | -0.991163 | 1 | -1.22329 | 18.1278  | 7.37525   | No change |
| NM_008943    | Psen1         | -0.990744 | 1 | -1.19011 | 22.0629  | 9.19057   | No change |
| NM_201364    | BC055324      | -0.990393 | 1 | -1.41525 | 5.43653  | 1.92429   | No change |
| NM_026644    | Agpat4        | -0.988984 | 1 | -1.6935  | 3.28396  | 0.939672  | No change |
| NM_001033449 | Als2cr4       | -0.988632 | 1 | -1.34221 | 11.9388  | 4.45811   | No change |
| NM_177461    | Micall1       | -0.988127 | 1 | -1.1878  | 9.92193  | 4.13972   | No change |
| NM_010710    | Lhx2          | -0.985713 | 1 | -2.47111 | 1.24996  | 0.188428  | No change |
| NM_009974    | Csnk2a2       | -0.985709 | 1 | -1.24835 | 10.4003  | 4.15572   | No change |
| NM_026097    | Rffl          | -0.985327 | 1 | -1.16331 | 23.5479  | 9.99647   | No change |
| NM_001159930 | Cenpl         | -0.984561 | 1 | -1.70172 | 3.38731  | 0.962561  | No change |
| NM_011158    | Prkar2b       | -0.984561 | 1 | -1.70172 | 1.80562  | 0.513098  | No change |
| NM_026106    | Dr1           | -0.984549 | 1 | -1.19779 | 18.9619  | 7.85505   | No change |
| NM_028120    | Ccdc123       | -0.983206 | 1 | -1.33986 | 8.52496  | 3.18822   | No change |
| NM_025854    | Cir1          | -0.982772 | 1 | -1.2826  | 15.6227  | 6.09024   | No change |
| NM_027285    | 1700029I01Rik | -0.981226 | 1 | -1.09688 | 40.253   | 17.9063   | No change |
| NM_175225    | Tasp1         | -0.980523 | 1 | -1.20906 | 20.5707  | 8.45281   | No change |
| NM_001012324 | Ecm2          | -0.980506 | 1 | -1.54911 | 2.55825  | 0.818529  | No change |
| NM_028028    | Zswim1        | -0.977608 | 1 | -1.33743 | 7.94721  | 2.97689   | No change |
| NM_029410    | Bcl2l12       | -0.976706 | 1 | -1.40726 | 14.2627  | 5.07545   | No change |
| NM_026212    | Agpat2        | -0.975666 | 1 | -1.27317 | 36.7199  | 14.4097   | No change |
| NR_015569    | 4732471J01Rik | -0.975415 | 1 | -1.72014 | 2.99159  | 0.836991  | No change |
| NM_011968    | Psmc6         | -0.975387 | 1 | -1.14965 | 86.19    | 36.9396   | No change |
| NM_008838    | Pigf          | -0.973888 | 1 | -1.20604 | 50.3496  | 20.7315   | No change |
| NM_007408    | Plin2         | -0.973402 | 1 | -1.34939 | 10.4521  | 3.88059   | No change |
| NM_013879    | Cabp1         | -0.972469 | 1 | -2.6935  | 1.59332  | 0.182365  | No change |
| NR_037998    | D030040B21Rik | -0.972469 | 1 | -2.6935  | 0.674932 | 0.07325   | No change |
| NM_153415    | Pomt2         | -0.972323 | 1 | -1.17309 | 12.8944  | 5.43505   | No change |
| NM_008008    | Fgf7          | -0.971756 | 1 | -1.80368 | 1.74754  | 0.456754  | No change |
| NM_172268    | Nup214        | -0.971431 | 1 | -1.21597 | 5.44277  | 2.22513   | No change |
| NM_153392    | Ttc39a        | -0.971364 | 1 | -1.28339 | 11.9576  | 4.65737   | No change |
| NM_177646    | Dgkd          | -0.970501 | 1 | -1.15997 | 12.8027  | 5.44673   | No change |
| NM_026179    | Abhd5         | -0.970118 | 1 | -1.1868  | 17.866   | 7.45732   | No change |
| NM_001081402 | Wdr70         | -0.96974  | 1 | -1.27802 | 13.3165  | 5.2066    | No change |
| NM_016716    | Cul3          | -0.967384 | 1 | -1.07045 | 86.385   | 39.1422   | No change |
| NM_019550    | Ptbp2         | -0.966903 | 1 | -1.12688 | 30.0401  | 13.082    | No change |
| NM_145404    | Prmt7         | -0.966537 | 1 | -1.29214 | 11.4403  | 4.42722   | No change |
| NM_009320    | Slc6a6        | -0.966142 | 1 | -1.22163 | 6.63151  | 2.69987   | No change |
| NR_038000    | 4921513I03Rik | -0.965995 | 1 | -2.1816  | 2.34373  | 0.455526  | No change |
| NM_134122    | Nrm           | -0.965204 | 1 | -1.38147 | 11.0918  | 4.02108   | No change |
| NM_009734    | Azi1          | -0.964916 | 1 | -1.32672 | 5.90189  | 2.22717   | No change |
| NM_175128    | 4930430F08Rik | -0.964311 | 1 | -1.25887 | 12.8784  | 5.10461   | No change |
| NM_001081073 | Cep76         | -0.963594 | 1 | -1.27023 | 7.25129  | 2.85071   | No change |
| NM_001115149 | Uspl1         | -0.962705 | 1 | -1.20475 | 12.0576  | 4.96823   | No change |
| NM_010046    | Dgat1         | -0.960375 | 1 | -1.19649 | 27.0432  | 11.2084   | No change |
| NM_145557    | 9430015G10Rik | -0.959315 | 1 | -1.22863 | 14.6883  | 5.94921   | No change |
| NR_037145    | Alg13         | -0.95911  | 1 | -1.43243 | 3.02008  | 1.054     | No change |
| NM_178218    | Hist3h2a      | -0.958804 | 1 | -1.2014  | 22.6239  | 9.34365   | No change |
| NM_028680    | Ift57         | -0.9588   | 1 | -1.43922 | 4.88399  | 1.69585   | No change |
| NM_029010    | Glb1l         | -0.958296 | 1 | -1.12859 | 25.8294  | 11.2336   | No change |
| NM_009352    | Terf1         | -0.957347 | 1 | -1.52725 | 5.54812  | 1.80247   | No change |
| NM_001042726 | Pcdh8         | -0.956527 | 1 | -2.51064 | 0.675901 | 0.0967012 | No change |
| NM_028227    | Brap          | -0.954745 | 1 | -1.10673 | 29.9086  | 13.2094   | No change |
| NM_001081265 | Heatr2        | -0.954545 | 1 | -1.49101 | 2.93337  | 0.979441  | No change |
| NM_028722    | Msl1          | -0.954228 | 1 | -1.13682 | 17.905   | 7.74151   | No change |
| NM_026562    | Cntd1         | -0.951681 | 1 | -1.14217 | 32.0938  | 13.8233   | No change |
| NM_001199283 | Slc43a2       | -0.951054 | 1 | -1.29129 | 3.29596  | 1.2757    | No change |
| NM_001004173 | Sgpp2         | -0.949453 | 1 | -1.44557 | 2.91114  | 1.00558   | No change |
| NM_001177391 | Gm6788        | -0.948285 | 1 | -1.15375 | 89.3888  | 38.1845   | No change |
| NM_001166414 | Rfx3          | -0.948062 | 1 | -1.23838 | 3.47474  | 1.3972    | No change |
| NM_001164195 | Pex3          | -0.948054 | 1 | -1.16032 | 41.9369  | 17.8308   | No change |
| NM_001174154 | Pcdha4-g      | -0.947179 | 1 | -1.58322 | 2.58664  | 0.804381  | No change |
| NR_015521    | 1700030C10Rik | -0.946743 | 1 | -1.53    | 5.01272  | 1.62404   | No change |
| NM_175143    | Qrich1        | -0.945938 | 1 | -1.0586  | 61.2988  | 28.0025   | No change |
| NM_001164610 | Smpd4         | -0.945338 | 1 | -1.19195 | 9.55245  | 3.97081   | No change |
| NM_001038695 | Kdm3a         | -0.945061 | 1 | -1.05452 | 43.6015  | 19.9751   | No change |
| NM_183037    | Trim46        | -0.944707 | 1 | -1.60861 | 2.18767  | 0.66686   | No change |
| NM_001077698 | Fmn1l         | -0.944232 | 1 | -2.378   | 0.81253  | 0.133158  | No change |
| NM_172809    | Sacs          | -0.944232 | 1 | -2.378   | 0.917287 | 0.150325  | No change |
| NM_028572    | Vgll3         | -0.944066 | 1 | -1.48109 | 3.01284  | 1.01296   | No change |
| NM_009822    | Runx1t1       | -0.942646 | 1 | -1.54706 | 1.3836   | 0.44232   | No change |
| NM_028041    | Ddx54         | -0.941579 | 1 | -1.2198  | 8.74043  | 3.56124   | No change |
| NM_144892    | Ncoa5         | -0.941404 | 1 | -1.1818  | 14.7007  | 6.15484   | No change |
| NM_001168248 | Rmi1          | -0.940469 | 1 | -1.18535 | 12.1533  | 5.07533   | No change |
| NM_144887    | Zdhhc5        | -0.940369 | 1 | -1.03233 | 62.2384  | 28.9587   | No change |
| NM_172703    | Eif4g3        | -0.937212 | 1 | -1.11939 | 14.0346  | 6.14199   | No change |
| NM_001008533 | Adora1        | -0.936371 | 1 | -1.2394  | 5.03833  | 2.02385   | No change |

|              |               |           |   |           |          |           |           |
|--------------|---------------|-----------|---|-----------|----------|-----------|-----------|
| NM_126165    | Vps4a         | -0.936158 | 1 | -1.15591  | 25.9627  | 11.0714   | No change |
| NM_145924    | Cenpi         | -0.935794 | 1 | -2.15463  | 1.15122  | 0.228053  | No change |
| NM_177090    | Cdh29         | -0.935794 | 1 | -2.15463  | 2.47206  | 0.489706  | No change |
| NM_029532    | Snmp35        | -0.935504 | 1 | -1.38156  | 12.8919  | 4.66773   | No change |
| NM_007633    | Ccne1         | -0.932511 | 1 | -1.74674  | 2.42286  | 0.660653  | No change |
| NM_010729    | Loxl1         | -0.932504 | 1 | -1.61795  | 1.92084  | 0.580694  | No change |
| NM_029406    | Pih1d1        | -0.930504 | 1 | -1.30817  | 17.4074  | 6.65093   | No change |
| NM_001034115 | Shank1        | -0.929818 | 1 | -2.56422  | 0.284424 | 0.0378046 | No change |
| NM_177267    | Dcaf5         | -0.927443 | 1 | -1.07652  | 19.9419  | 8.99431   | No change |
| NM_019718    | Arl3          | -0.926643 | 1 | -1.13534  | 72.0669  | 31.1793   | No change |
| NM_001081670 | Gm5936        | -0.926459 | 1 | -1.57265  | 2.48816  | 0.778971  | No change |
| NR_024720    | 2700099C18Rik | -0.926067 | 1 | -1.62311  | 4.86484  | 1.46397   | No change |
| NM_013636    | Ppp1cc        | -0.924941 | 1 | -1.01854  | 118.909  | 55.8575   | No change |
| NM_177318    | Zfp653        | -0.923515 | 1 | -1.37302  | 6.54611  | 2.38395   | No change |
| NM_146128    | Dlgap4        | -0.922719 | 1 | -1.17731  | 8.31833  | 3.49261   | No change |
| NM_028250    | Acbd6         | -0.922622 | 1 | -1.26642  | 15.2235  | 5.99457   | No change |
| NR_033764    | A730017C20Rik | -0.921424 | 1 | -2.76061  | 0.754019 | 0.0739732 | No change |
| NM_001128151 | Cecr2         | -0.920864 | 1 | -1.2437   | 2.78378  | 1.11431   | No change |
| NM_022433    | Sirt3         | -0.919382 | 1 | -1.25227  | 16.4737  | 6.55313   | No change |
| NM_001100449 | Taf4b         | -0.91661  | 1 | -1.35246  | 2.82886  | 1.0457    | No change |
| NM_007638    | Cct7          | -0.916447 | 1 | -1.0428   | 63.781   | 29.4542   | No change |
| NM_027081    | Fam116b       | -0.915985 | 1 | -1.20807  | 6.70938  | 2.7552    | No change |
| NM_177594    | Mtmr9         | -0.914988 | 1 | -1.13201  | 22.6907  | 9.83846   | No change |
| NM_001081155 | Rap1gap       | -0.913294 | 1 | -2.30118  | 1.01789  | 0.178474  | No change |
| NM_008446    | Kif4          | -0.913294 | 1 | -2.30118  | 0.695155 | 0.121886  | No change |
| NM_001030014 | Mcat          | -0.913246 | 1 | -1.18085  | 19.2917  | 8.07791   | No change |
| NM_001033980 | Fam92b        | -0.912177 | 1 | -2.64103  | 1.52398  | 0.181138  | No change |
| NM_008456    | Klk1b5        | -0.912177 | 1 | -2.64103  | 2.10455  | 0.250143  | No change |
| NR_038091    | A730098P11Rik | -0.91191  | 1 | -0.989148 | 79.5815  | 38.1568   | No change |
| NM_001163637 | Jakmp12       | -0.911557 | 1 | -2.47111  | 0.694746 | 0.102237  | No change |
| NM_001201322 | 4930415O20Rik | -0.911557 | 1 | -2.47111  | 4.30963  | 0.634196  | No change |
| NM_026891    | Cdan1         | -0.911305 | 1 | -1.16519  | 6.32084  | 2.67642   | No change |
| NM_001205330 | Mtap4         | -0.911282 | 1 | -1.05524  | 20.9344  | 9.5829    | No change |
| NM_008652    | Mybl2         | -0.910637 | 1 | -1.83724  | 1.07307  | 0.271495  | No change |
| NM_001015507 | Vprbp         | -0.909146 | 1 | -1.09655  | 13.4164  | 5.96483   | No change |
| NM_025543    | Mcts2         | -0.908865 | 1 | -1.25316  | 28.4032  | 11.2879   | No change |
| NM_010865    | Myoc          | -0.906041 | 1 | -2.40072  | 1.30674  | 0.207089  | No change |
| NM_180956    | Ndr3          | -0.905728 | 1 | -1.07117  | 34.288   | 15.5195   | No change |
| NM_011993    | Dpysl4        | -0.904963 | 1 | -2.12715  | 1.34685  | 0.272039  | No change |
| NM_134027    | Med1          | -0.904347 | 1 | -1.12225  | 19.1217  | 8.3472    | No change |
| NM_178405    | Atp1a2        | -0.903592 | 1 | -1.13179  | 7.92398  | 3.43564   | No change |
| NM_023113    | Aspa          | -0.902367 | 1 | -1.79304  | 2.6805   | 0.701998  | No change |
| NM_001163284 | Zbtb5         | -0.901682 | 1 | -1.13407  | 8.49247  | 3.67601   | No change |
| NM_146247    | Mettl22       | -0.901444 | 1 | -1.61197  | 4.51173  | 1.36693   | No change |
| NM_001159517 | Qk            | -0.900397 | 1 | -1.04035  | 27.2907  | 12.6228   | No change |
| NM_031166    | Id4           | -0.900051 | 1 | -1.45005  | 5.6678   | 1.94614   | No change |
| NM_001190466 | Dact1         | -0.89886  | 1 | -1.58658  | 1.66774  | 0.515383  | No change |
| NM_144851    | Senp1         | -0.898349 | 1 | -1.10912  | 15.2912  | 6.73698   | No change |
| NM_029624    | Lmf1          | -0.897888 | 1 | -1.26072  | 11.5758  | 4.57371   | No change |
| NM_019765    | Clp1          | -0.897874 | 1 | -1.02972  | 31.4856  | 14.6719   | No change |
| NM_001029936 | Specc1        | -0.89748  | 1 | -1.27646  | 2.80818  | 1.09687   | No change |
| NM_001033423 | Gm773         | -0.897194 | 1 | -3.88615  | 1.09926  | 0         | No change |
| NM_001034904 | Gm5891        | -0.897194 | 1 | -3.88615  | 0.605674 | 0         | No change |
| NM_001098528 | Kcnb2         | -0.897194 | 1 | -2.88615  | 0.19691  | 0.0135225 | No change |
| NM_001134752 | Gm16532       | -0.897194 | 1 | -2.88615  | 0.477349 | 0.0327813 | No change |
| NM_001163195 | Gm14692       | -0.897194 | 1 | -3.88615  | 1.51506  | 0         | No change |
| NM_001190373 | Kcng2         | -0.897194 | 1 | -3.88615  | 0.371366 | 0         | No change |
| NM_001201364 | Gm10662       | -0.897194 | 1 | -3.88615  | 0.606377 | 0         | No change |
| NM_007685    | Cfc1          | -0.897194 | 1 | -3.88615  | 1.00712  | 0         | No change |
| NM_008498    | Lhx1          | -0.897194 | 1 | -2.88615  | 0.380143 | 0.0261058 | No change |
| NM_008639    | Mtnr1a        | -0.897194 | 1 | -3.88615  | 0.695538 | 0         | No change |
| NM_010056    | Dlx5          | -0.897194 | 1 | -2.88615  | 0.743524 | 0.0510604 | No change |
| NM_010639    | Klk1          | -0.897194 | 1 | -3.88615  | 1.19337  | 0         | No change |
| NM_011392    | Slc34a1       | -0.897194 | 1 | -3.88615  | 0.339303 | 0         | No change |
| NM_011452    | Serp1b9b      | -0.897194 | 1 | -2.88615  | 0.541936 | 0.0372167 | No change |
| NM_013458    | Add2          | -0.897194 | 1 | -2.88615  | 0.33517  | 0.0230173 | No change |
| NM_022416    | Stk32b        | -0.897194 | 1 | -2.88615  | 0.303894 | 0.0208695 | No change |
| NM_025312    | Sostdc1       | -0.897194 | 1 | -3.88615  | 0.597027 | 0         | No change |
| NM_026200    | Kcnv1         | -0.897194 | 1 | -3.88615  | 0.232516 | 0         | No change |
| NM_028496    | 1700031F05Rik | -0.897194 | 1 | -3.88615  | 0.768672 | 0         | No change |
| NM_028992    | Gsdmc4        | -0.897194 | 1 | -3.88615  | 0.501629 | 0         | No change |
| NM_146908    | Olf1280       | -0.897194 | 1 | -3.88615  | 1.13877  | 0         | No change |
| NM_152811    | Ugt2b1        | -0.897194 | 1 | -2.88615  | 0.410764 | 0.0282086 | No change |
| NM_153568    | Lrrc66        | -0.897194 | 1 | -3.88615  | 0.337987 | 0         | No change |
| NM_177233    | Fam19a4       | -0.897194 | 1 | -3.88615  | 0.479099 | 0         | No change |
| NM_183179    | Kcnv2         | -0.897194 | 1 | -2.88615  | 0.205908 | 0.0141404 | No change |

|              |               |           |   |           |          |           |           |
|--------------|---------------|-----------|---|-----------|----------|-----------|-----------|
| NM_026370    | Myst1         | -0.89718  | 1 | -1.26466  | 13.2152  | 5.2064    | No change |
| NM_001080706 | Btaf1         | -0.896479 | 1 | -1.03167  | 15.9551  | 7.42462   | No change |
| NM_007691    | Chek1         | -0.896226 | 1 | -1.4962   | 2.35934  | 0.781945  | No change |
| NM_010778    | Cd46          | -0.896226 | 1 | -1.4962   | 6.60733  | 2.18983   | No change |
| NM_023536    | Mrto4         | -0.894938 | 1 | -1.26568  | 20.9828  | 8.25982   | No change |
| NM_018810    | Mkrn1         | -0.894859 | 1 | -0.992788 | 86.9263  | 41.5683   | No change |
| NM_027456    | Armc9         | -0.893692 | 1 | -1.44957  | 4.25507  | 1.46106   | No change |
| NM_009836    | Cct3          | -0.893364 | 1 | -1.05476  | 49.0379  | 22.4507   | No change |
| NM_001166388 | Ptp4a3        | -0.892749 | 1 | -1.38013  | 3.07469  | 1.11231   | No change |
| NM_138598    | D11Wsu99e     | -0.891822 | 1 | -1.07127  | 29.8494  | 13.5071   | No change |
| NM_009193    | Slbp          | -0.89124  | 1 | -1.11173  | 32.1331  | 14.1293   | No change |
| NM_013661    | Sema5b        | -0.890414 | 1 | -1.34748  | 2.89112  | 1.07151   | No change |
| NM_027999    | Haus5         | -0.890069 | 1 | -1.40615  | 4.79437  | 1.70074   | No change |
| NM_011138    | Pou2f2        | -0.889892 | 1 | -2.23664  | 1.05724  | 0.196031  | No change |
| NM_011988    | Slc27a3       | -0.889625 | 1 | -1.56732  | 2.83079  | 0.887482  | No change |
| NM_001033298 | Plk1s1        | -0.888573 | 1 | -1.0688   | 35.9486  | 16.2949   | No change |
| NM_207110    | Rnf216        | -0.888498 | 1 | -1.07279  | 15.8454  | 7.16219   | No change |
| NM_019986    | Habp4         | -0.888101 | 1 | -1.14263  | 15.4753  | 6.65612   | No change |
| NM_172652    | 4632411B12Rik | -0.887152 | 1 | -1.04777  | 20.7151  | 9.53005   | No change |
| NM_007771    | Cry1          | -0.885791 | 1 | -1.19874  | 8.87337  | 3.66572   | No change |
| NM_019785    | Actr10        | -0.885718 | 1 | -1.08762  | 15.4084  | 6.89165   | No change |
| NM_133801    | Gtf2f1        | -0.885536 | 1 | -1.01742  | 82.416   | 38.7337   | No change |
| NM_027973    | Mlf1ip        | -0.88474  | 1 | -1.26252  | 7.59927  | 2.99735   | No change |
| NM_026375    | Ahctf1        | -0.883268 | 1 | -0.955136 | 52.8912  | 25.9654   | No change |
| NM_001113326 | Msr1          | -0.882795 | 1 | -1.86015  | 2.56538  | 0.636184  | No change |
| NM_001081428 | Fam184a       | -0.882467 | 1 | -1.06943  | 18.1777  | 8.23533   | No change |
| NM_021529    | Ppp2r3c       | -0.882243 | 1 | -1.09755  | 22.8139  | 10.1317   | No change |
| NM_027090    | 2300009A05Rik | -0.880413 | 1 | -1.28693  | 27.2711  | 10.5646   | No change |
| NM_180588    | Reep4         | -0.880174 | 1 | -1.3177   | 8.51339  | 3.22415   | No change |
| NM_001044389 | Clpx          | -0.878012 | 1 | -1.09949  | 18.3846  | 8.15284   | No change |
| NM_028601    | Zmiz2         | -0.878006 | 1 | -1.17051  | 7.21305  | 3.0404    | No change |
| NM_013839    | Nr1h3         | -0.877397 | 1 | -1.42867  | 4.74126  | 1.65248   | No change |
| NM_001162943 | Dchs1         | -0.87736  | 1 | -1.35821  | 1.11891  | 0.411159  | No change |
| NM_145521    | Ppapdc3       | -0.877341 | 1 | -2.51841  | 1.14627  | 0.157436  | No change |
| NM_145456    | Zswim6        | -0.87578  | 1 | -1.191    | 4.81389  | 1.99931   | No change |
| NM_001001792 | Zfp239        | -0.875729 | 1 | -1.76879  | 1.43697  | 0.382817  | No change |
| NM_152895    | Kdm5b         | -0.874862 | 1 | -0.997029 | 26.0076  | 12.3982   | No change |
| NM_013862    | Rabgap1l      | -0.874634 | 1 | -1.14519  | 10.4136  | 4.46964   | No change |
| NM_001081315 | Brpf3         | -0.874338 | 1 | -1.14801  | 5.75232  | 2.46395   | No change |
| NM_017462    | Polg          | -0.873911 | 1 | -1.05443  | 16.6499  | 7.62271   | No change |
| NM_001145937 | Odz3          | -0.873336 | 1 | -1.21024  | 2.11693  | 0.867009  | No change |
| NR_027930    | 1110020A21Rik | -0.872909 | 1 | -1.53186  | 7.84352  | 2.52489   | No change |
| NM_001159556 | Cd36          | -0.872031 | 1 | -1.24208  | 5.7001   | 2.28109   | No change |
| NM_028232    | Sgol1         | -0.871719 | 1 | -1.91363  | 1.00417  | 0.238706  | No change |
| NM_001039050 | Pkib          | -0.870415 | 1 | -1.27317  | 2.95955  | 1.15771   | No change |
| NM_172681    | D930015E06Rik | -0.868998 | 1 | -1.04513  | 16.3123  | 7.51692   | No change |
| NM_001081100 | Morn1         | -0.868782 | 1 | -1.63617  | 3.06296  | 0.907652  | No change |
| NM_007829    | Daxx          | -0.865775 | 1 | -1.13659  | 13.5282  | 5.84119   | No change |
| NM_019682    | Dynll1        | -0.865542 | 1 | -0.981403 | 89.5559  | 43.1598   | No change |
| NM_181848    | Optn          | -0.864771 | 1 | -1.02892  | 37.9802  | 17.7023   | No change |
| NM_027290    | Mcm10         | -0.864532 | 1 | -1.72942  | 1.19679  | 0.328751  | No change |
| NM_025556    | 2410022L05Rik | -0.862991 | 1 | -1.16325  | 35.7155  | 15.128    | No change |
| NM_028977    | Lrrc17        | -0.861734 | 1 | -1.47111  | 3.50376  | 1.1812    | No change |
| NM_023178    | Dmap1         | -0.861257 | 1 | -1.15049  | 20.3137  | 8.68324   | No change |
| NM_001003918 | Usp7          | -0.861255 | 1 | -0.945113 | 62.8354  | 31.0605   | No change |
| NM_009410    | Top3a         | -0.861123 | 1 | -1.12615  | 9.70856  | 4.223     | No change |
| NM_001199330 | Al987944      | -0.859839 | 1 | -1.07357  | 18.7132  | 8.45032   | No change |
| NM_027263    | Apitd1        | -0.857708 | 1 | -2.20807  | 3.67199  | 0.694751  | No change |
| NM_013854    | Abcf1         | -0.856416 | 1 | -1.01634  | 30.4879  | 14.3354   | No change |
| NM_001146215 | Msh5          | -0.855945 | 1 | -1.4584   | 2.91798  | 0.992997  | No change |
| NM_008451    | Klc2          | -0.855202 | 1 | -1.09157  | 14.9458  | 6.66274   | No change |
| NM_026563    | Sdccag3       | -0.854704 | 1 | -0.963114 | 93.4743  | 45.6257   | No change |
| NM_010141    | Epha7         | -0.854694 | 1 | -1.78661  | 0.569387 | 0.149298  | No change |
| NM_031863    | Cenpq         | -0.85279  | 1 | -1.36217  | 7.34627  | 2.68843   | No change |
| NM_025414    | Myo19         | -0.850353 | 1 | -1.28927  | 3.55214  | 1.37215   | No change |
| NM_172438    | Thoc5         | -0.850327 | 1 | -1.22125  | 8.54401  | 3.46909   | No change |
| NM_001205226 | Cnot1         | -0.84981  | 1 | -0.913032 | 70.8005  | 35.7883   | No change |
| NM_025999    | Rnf141        | -0.849669 | 1 | -1.22718  | 19.3998  | 7.84271   | No change |
| NM_152922    | Egfl8         | -0.849579 | 1 | -1.38184  | 8.45495  | 3.04832   | No change |
| NM_181412    | Zbed4         | -0.849342 | 1 | -1.04488  | 12.0607  | 5.55732   | No change |
| NM_011724    | Xirp1         | -0.849303 | 1 | -2.58658  | 0.298394 | 0.0368852 | No change |
| NM_013487    | Cd3d          | -0.849303 | 1 | -2.58658  | 1.31002  | 0.161935  | No change |
| NM_008252    | Hmgb2         | -0.847565 | 1 | -1.10171  | 14.5237  | 6.42705   | No change |
| NM_007400    | Adam12        | -0.846421 | 1 | -1.58658  | 0.699291 | 0.215167  | No change |
| NM_028567    | 1700094D03Rik | -0.845846 | 1 | -1.18993  | 7.08856  | 2.94396   | No change |
| NM_027994    | Cand1         | -0.845159 | 1 | -0.949042 | 27.0571  | 13.3367   | No change |

|              |               |           |   |           |          |           |           |
|--------------|---------------|-----------|---|-----------|----------|-----------|-----------|
| NM_026539    | Chd1l         | -0.844565 | 1 | -1.02391  | 25.5782  | 11.9612   | No change |
| NM_009995    | Cyp21a1       | -0.843951 | 1 | -2.23978  | 1.63088  | 0.298662  | No change |
| NM_027057    | Wdfy1         | -0.843885 | 1 | -1.23782  | 23.717   | 9.51205   | No change |
| NM_001083918 | Gm13139       | -0.843404 | 1 | -0.972312 | 52.7119  | 25.5615   | No change |
| NM_001122754 | Txk           | -0.843288 | 1 | -2.6935   | 0.617845 | 0.0636445 | No change |
| NM_009317    | Tal2          | -0.843288 | 1 | -2.6935   | 1.21841  | 0.125509  | No change |
| NM_009522    | Wnt3a         | -0.843288 | 1 | -2.6935   | 0.506673 | 0.0521926 | No change |
| NM_175319    | C330005M16Rik | -0.843288 | 1 | -2.6935   | 0.724836 | 0.0746656 | No change |
| NM_023135    | Sult1e1       | -0.842791 | 1 | -1.35271  | 8.35209  | 3.07676   | No change |
| NM_001085421 | Tsply5        | -0.841699 | 1 | -1.19381  | 5.23262  | 2.1668    | No change |
| NM_001113399 | Zfp385b       | -0.840956 | 1 | -1.88615  | 1.33121  | 0.322656  | No change |
| NM_007645    | Cd37          | -0.840956 | 1 | -1.88615  | 2.89914  | 0.702685  | No change |
| NM_025343    | Rmnd1         | -0.839935 | 1 | -1.08215  | 23.1053  | 10.3668   | No change |
| NM_009743    | Bcl2l1        | -0.839513 | 1 | -1.05109  | 23.3682  | 10.7187   | No change |
| NR_002875    | Gm1821        | -0.839381 | 1 | -0.893933 | 1123.22  | 575.349   | No change |
| NM_010908    | Nfkbib        | -0.839373 | 1 | -1.18119  | 11.3945  | 4.76146   | No change |
| NM_001162503 | Sqrdl         | -0.838183 | 1 | -0.982242 | 70.1536  | 33.7814   | No change |
| NM_001162906 | 2410089E03Rik | -0.837589 | 1 | -1.04212  | 5.6452   | 2.60584   | No change |
| NM_138757    | 4933424B01Rik | -0.837499 | 1 | -1.00162  | 29.595   | 14.0578   | No change |
| NM_153078    | Ehbp1         | -0.835812 | 1 | -1.02663  | 14.008   | 6.53728   | No change |
| NM_175443    | Etnk2         | -0.835011 | 1 | -1.39429  | 3.88372  | 1.38605   | No change |
| NM_178691    | Yod1          | -0.834053 | 1 | -1.1028   | 9.12364  | 4.0332    | No change |
| NM_008188    | Thumpd3       | -0.833093 | 1 | -1.0393   | 28.168   | 13.0276   | No change |
| NM_172598    | Wdhd1         | -0.832584 | 1 | -1.24778  | 3.67332  | 1.46196   | No change |
| NM_010858    | Myl4          | -0.831521 | 1 | -2.27846  | 3.23603  | 0.569124  | No change |
| NM_011815    | Fyb           | -0.831225 | 1 | -1.40239  | 3.17614  | 1.12634   | No change |
| NM_028266    | Col16a1       | -0.829334 | 1 | -1.20272  | 3.58773  | 1.47553   | No change |
| NM_144879    | Vash2         | -0.827056 | 1 | -1.01912  | 16.4807  | 7.73134   | No change |
| NM_012027    | Mprlp         | -0.82347  | 1 | -0.930118 | 23.7784  | 11.8753   | No change |
| NM_001204973 | Brd2          | -0.821832 | 1 | -0.923321 | 49.2837  | 24.7301   | No change |
| NM_009769    | Klf5          | -0.821795 | 1 | -2.32672  | 1.49486  | 0.249708  | No change |
| NM_010626    | Klf7          | -0.821257 | 1 | -1.45689  | 1.5412   | 0.523906  | No change |
| NM_001033128 | Bbs1          | -0.82103  | 1 | -1.14114  | 4.44531  | 1.91118   | No change |
| NM_008384    | Inpp1         | -0.818953 | 1 | -1.18491  | 10.8822  | 4.53246   | No change |
| NM_029843    | 1700109H08Rik | -0.81869  | 1 | -1.39062  | 11.7942  | 4.21709   | No change |
| NM_029738    | Cluap1        | -0.818108 | 1 | -1.19195  | 11.6228  | 4.81607   | No change |
| NM_008415    | Jrk           | -0.81779  | 1 | -1.13212  | 4.65124  | 2.01259   | No change |
| NM_173428    | Sspo          | -0.817269 | 1 | -2.38865  | 0.147607 | 0.023038  | No change |
| NM_025680    | Ctnnb1        | -0.815303 | 1 | -1.18449  | 6.94122  | 2.89162   | No change |
| NM_029840    | 2610029I01Rik | -0.814399 | 1 | -1.63822  | 2.76664  | 0.814264  | No change |
| NM_001033139 | Al846148      | -0.814328 | 1 | -1.15463  | 6.94083  | 2.95464   | No change |
| NM_029278    | Nop14         | -0.814304 | 1 | -1.02974  | 19.577   | 9.11336   | No change |
| NM_026330    | Nsmce1        | -0.813986 | 1 | -0.99701  | 67.9931  | 32.3935   | No change |
| NM_010193    | Fem1b         | -0.813726 | 1 | -0.926911 | 28.5064  | 14.2675   | No change |
| NM_144536    | Cdkal1        | -0.813715 | 1 | -1.01501  | 23.7527  | 11.1731   | No change |
| NM_052992    | Fxyd1         | -0.81351  | 1 | -1.343    | 15.5495  | 5.76172   | No change |
| NM_134081    | Dnajc9        | -0.812414 | 1 | -1.04075  | 28.9711  | 13.381    | No change |
| NM_026872    | Ubap2         | -0.811977 | 1 | -1.01975  | 12.9687  | 6.0798    | No change |
| NM_153805    | Pkn3          | -0.811773 | 1 | -1.68133  | 1.37912  | 0.391899  | No change |
| NM_153515    | Ammecr1l      | -0.81091  | 1 | -1.03474  | 14.5547  | 6.75103   | No change |
| NM_010436    | H2afx         | -0.8109   | 1 | -1.1538   | 16.0001  | 6.8146    | No change |
| NR_028309    | Serpinc6a     | -0.810652 | 1 | -0.960994 | 72.7023  | 35.5264   | No change |
| NM_029441    | Cdyl2         | -0.810061 | 1 | -1.38865  | 3.41094  | 1.22083   | No change |
| NM_023197    | 2310008H09Rik | -0.809866 | 1 | -0.955031 | 21.0787  | 10.3434   | No change |
| NM_001039244 | Gm7120        | -0.809394 | 1 | -1.25856  | 14.3194  | 5.64913   | No change |
| NM_011890    | Sgcb          | -0.808825 | 1 | -1.11347  | 7.29279  | 3.19756   | No change |
| NM_172609    | Tommm2        | -0.808741 | 1 | -0.96905  | 91.3359  | 44.3786   | No change |
| NM_001039488 | 4933421E11Rik | -0.80808  | 1 | -0.989593 | 21.8685  | 10.4726   | No change |
| NM_011690    | Vars          | -0.807937 | 1 | -1.04317  | 10.543   | 4.86085   | No change |
| NM_023773    | Mphosph8      | -0.80264  | 1 | -1.03568  | 15.3951  | 7.13511   | No change |
| NM_146084    | Fam13b        | -0.802404 | 1 | -0.958689 | 29.3027  | 14.341    | No change |
| NM_010786    | Mdm2          | -0.80226  | 1 | -0.960756 | 31.4965  | 15.3923   | No change |
| NM_198022    | Tnrc6c        | -0.801975 | 1 | -0.993529 | 7.56351  | 3.61176   | No change |
| NM_001135577 | BC024659      | -0.801293 | 1 | -1.05477  | 8.58142  | 3.92344   | No change |
| NM_177263    | Zhx3          | -0.800754 | 1 | -0.973608 | 17.9677  | 8.70145   | No change |
| NM_201407    | Dennd4b       | -0.799726 | 1 | -1.24655  | 2.4397   | 0.970687  | No change |
| NM_001163511 | Spata5        | -0.799628 | 1 | -1.01018  | 18.8722  | 8.90603   | No change |
| NM_133755    | Tubgcp2       | -0.799318 | 1 | -0.995518 | 20.3996  | 9.72727   | No change |
| NM_009103    | Rrm1          | -0.799311 | 1 | -1.07277  | 8.31712  | 3.75389   | No change |
| NM_026605    | Sympk         | -0.798351 | 1 | -1.03267  | 10.8404  | 5.0346    | No change |
| NM_001037762 | Zdhhc12       | -0.798179 | 1 | -1.1903   | 14.5799  | 6.0449    | No change |
| NM_175367    | Ston2         | -0.796635 | 1 | -1.09998  | 2.75363  | 1.21876   | No change |
| NM_175510    | Unc80         | -0.796524 | 1 | -1.73414  | 0.272942 | 0.0742684 | No change |
| NM_001085522 | Gm13251       | -0.795763 | 1 | -0.931171 | 35.007   | 17.4663   | No change |
| NM_173018    | Myo9a         | -0.795299 | 1 | -0.900434 | 17.7113  | 9.02933   | No change |
| NM_008676    | Nbr1          | -0.795062 | 1 | -0.894702 | 53.0225  | 27.1397   | No change |

|              |                |           |   |           |          |           |           |
|--------------|----------------|-----------|---|-----------|----------|-----------|-----------|
| NM_021360    | Neurl1a        | -0.794208 | 1 | -1.55241  | 1.2068   | 0.379846  | No change |
| NM_199252    | Unc93a         | -0.793404 | 1 | -1.20165  | 5.88026  | 2.41748   | No change |
| NM_207213    | Snx25          | -0.793052 | 1 | -0.994093 | 19.5195  | 9.31621   | No change |
| NM_001033317 | Cnga4          | -0.792754 | 1 | -1.6935   | 1.54561  | 0.43422   | No change |
| NR_003368    | Pvt1           | -0.792754 | 1 | -1.6935   | 1.24695  | 0.350314  | No change |
| NM_021337    | Skiv2l         | -0.792169 | 1 | -0.943037 | 26.3613  | 13.043    | No change |
| NM_001159500 | Esrrb          | -0.791949 | 1 | -2.2437   | 0.648306 | 0.116869  | No change |
| NM_153534    | Adcy2          | -0.791854 | 1 | -1.58129  | 1.10886  | 0.340969  | No change |
| NM_001205181 | Abhd4          | -0.791368 | 1 | -0.945625 | 37.5834  | 18.5615   | No change |
| NM_178791    | E130203B14Rik  | -0.790957 | 1 | -1.45551  | 2.31209  | 0.785173  | No change |
| NM_001013616 | Trim6          | -0.789583 | 1 | -1.6155   | 1.12907  | 0.337663  | No change |
| NM_001198794 | AB124611       | -0.789583 | 1 | -1.6155   | 3.30602  | 0.988705  | No change |
| NM_009418    | Tpp2           | -0.789154 | 1 | -0.96302  | 17.0297  | 8.30792   | No change |
| NM_172304    | Tex10          | -0.788812 | 1 | -0.956181 | 26.6108  | 13.0448   | No change |
| NM_177673    | BC046331       | -0.788602 | 1 | -1.12511  | 6.80554  | 2.95752   | No change |
| NM_026005    | 2610301B20Rik  | -0.788244 | 1 | -1.0441   | 17.7358  | 8.16885   | No change |
| NM_001160108 | Zc3h14         | -0.7867   | 1 | -0.952597 | 36.7536  | 18.062    | No change |
| NM_001004147 | Fbll1          | -0.786598 | 1 | -3.79304  | 0.648306 | 0         | No change |
| NM_001029935 | Trim38         | -0.786598 | 1 | -3.79304  | 0.689054 | 0         | No change |
| NM_001085525 | Gm14511        | -0.786598 | 1 | -3.79304  | 1.15059  | 0         | No change |
| NM_001104623 | Vmn2r12        | -0.786598 | 1 | -3.79304  | 0.390906 | 0         | No change |
| NM_001111293 | Xlr5b          | -0.786598 | 1 | -2.79304  | 0.860407 | 0.0633077 | No change |
| NM_001126488 | Tex28          | -0.786598 | 1 | -3.79304  | 0.687113 | 0         | No change |
| NM_001126491 | Gm14459        | -0.786598 | 1 | -3.79304  | 1.80685  | 0         | No change |
| NM_001163318 | Gm11744        | -0.786598 | 1 | -2.79304  | 1.2181   | 0.0896267 | No change |
| NM_001170884 | Trim43b        | -0.786598 | 1 | -2.79304  | 0.431344 | 0.0317378 | No change |
| NM_001185002 | Rhox13         | -0.786598 | 1 | -3.79304  | 0.778071 | 0         | No change |
| NM_008919    | Ppyr1          | -0.786598 | 1 | -3.79304  | 0.512717 | 0         | No change |
| NM_010246    | Fzd9           | -0.786598 | 1 | -3.79304  | 0.462418 | 0         | No change |
| NM_011060    | Padi3          | -0.786598 | 1 | -2.79304  | 0.318025 | 0.0233999 | No change |
| NM_028638    | Gadl1          | -0.786598 | 1 | -2.79304  | 0.267169 | 0.019658  | No change |
| NM_029848    | Hyal4          | -0.786598 | 1 | -2.79304  | 0.46729  | 0.0343826 | No change |
| NM_033268    | Actn2          | -0.786598 | 1 | -2.79304  | 0.326978 | 0.0240586 | No change |
| NM_080854    | Slc34a3        | -0.786598 | 1 | -3.79304  | 0.481352 | 0         | No change |
| NM_144890    | BC018465       | -0.786598 | 1 | -3.79304  | 0.59603  | 0         | No change |
| NM_175086    | Agtr1b         | -0.786598 | 1 | -3.79304  | 0.454449 | 0         | No change |
| NM_175632    | Oscar          | -0.786598 | 1 | -2.79304  | 0.535805 | 0.0394239 | No change |
| NM_176847    | Ush1g          | -0.786598 | 1 | -3.79304  | 0.306535 | 0         | No change |
| NM_177075    | C030019I05Rik  | -0.786598 | 1 | -2.79304  | 0.431154 | 0.0317238 | No change |
| NM_177360    | Dmrt3          | -0.786598 | 1 | -3.79304  | 0.408072 | 0         | No change |
| NM_178915    | Tmem179        | -0.786598 | 1 | -2.79304  | 0.411168 | 0.0302533 | No change |
| NM_198667    | BC061212       | -0.786598 | 1 | -3.79304  | 0.612109 | 0         | No change |
| NM_198898    | Ssxb3          | -0.786598 | 1 | -3.79304  | 1.6154   | 0         | No change |
| NR_015560    | 2610028E06Rik  | -0.786598 | 1 | -2.79304  | 0.275388 | 0.0202628 | No change |
| NM_013763    | Tbl2           | -0.786356 | 1 | -0.995293 | 12.7781  | 6.09296   | No change |
| NM_153779    | Aifm2          | -0.786181 | 1 | -1.47111  | 4.51325  | 1.51367   | No change |
| NM_009801    | Car2           | -0.784354 | 1 | -1.08559  | 15.3402  | 6.85824   | No change |
| NM_001033794 | Fbxw18         | -0.783618 | 1 | -2.53     | 1.10114  | 0.141786  | No change |
| NM_025967    | D16Ert472e     | -0.783065 | 1 | -1.05457  | 5.63365  | 2.57519   | No change |
| NM_019683    | Ankrd49        | -0.782372 | 1 | -1.01949  | 24.5743  | 11.5175   | No change |
| NM_007403    | Adam8          | -0.782066 | 1 | -1.91589  | 1.10259  | 0.260284  | No change |
| NM_001039519 | Gtf2a2         | -0.781568 | 1 | -1.08628  | 30.7     | 13.7175   | No change |
| NM_007708    | Cit            | -0.781472 | 1 | -1.48881  | 0.818609 | 0.270674  | No change |
| NM_019639    | Ubc            | -0.780431 | 1 | -0.803783 | 1723.19  | 939.663   | No change |
| NM_001177371 | Dbn1           | -0.780365 | 1 | -1.31175  | 3.11374  | 1.17922   | No change |
| NM_026182    | Mtfr1          | -0.779988 | 1 | -0.93467  | 35.2561  | 17.5449   | No change |
| NM_025690    | Sltm           | -0.779753 | 1 | -0.955238 | 20.9777  | 10.2892   | No change |
| NM_178208    | Hist1h4c       | -0.779626 | 1 | -1.0129   | 143.183  | 67.4191   | No change |
| NM_009315    | Taf6           | -0.779058 | 1 | -0.966442 | 30.1059  | 14.6499   | No change |
| NM_001167592 | Pate-dj        | -0.77873  | 1 | -1.58658  | 3.35617  | 1.02636   | No change |
| NM_198162    | Morc2a         | -0.778258 | 1 | -1.02218  | 9.27767  | 4.33964   | No change |
| NM_008937    | Prox1          | -0.777779 | 1 | -2.28824  | 0.606758 | 0.104171  | No change |
| NR_033355    | 5430416O09Rik  | -0.777779 | 1 | -2.28824  | 0.614035 | 0.10542   | No change |
| NM_001164413 | Cnot4          | -0.777713 | 1 | -0.976717 | 17.1911  | 8.30471   | No change |
| NM_007435    | Abcd1          | -0.77734  | 1 | -1.24632  | 3.50411  | 1.39318   | No change |
| NM_019757    | Fzr1           | -0.777264 | 1 | -1.00985  | 19.9123  | 9.39589   | No change |
| NM_026592    | B230118H07Rik  | -0.777125 | 1 | -0.967357 | 29.1488  | 14.1747   | No change |
| NM_026819    | Dhrs1          | -0.776485 | 1 | -0.944939 | 56.9009  | 28.1112   | No change |
| NM_001033201 | Ncbp1          | -0.775389 | 1 | -0.981383 | 18.2129  | 8.76907   | No change |
| NM_175211    | Ralgps1        | -0.775048 | 1 | -1.03598  | 13.1342  | 6.08309   | No change |
| NM_001100116 | 1700047117Rik2 | -0.774829 | 1 | -0.970018 | 16.3663  | 7.94355   | No change |
| NM_028527    | Fam177a        | -0.774829 | 1 | -0.970018 | 16.3663  | 7.94355   | No change |
| NM_011849    | Nek4           | -0.774614 | 1 | -1.0324   | 13.5585  | 6.2956    | No change |
| NM_001146217 | Smoc1          | -0.774301 | 1 | -1.31583  | 2.61149  | 0.985688  | No change |
| NM_022989    | Arl6ip6        | -0.772765 | 1 | -1.07357  | 10.7283  | 4.83668   | No change |
| NM_001159328 | Hgs            | -0.771858 | 1 | -1.03025  | 12.5821  | 5.85091   | No change |



|              |               |           |   |           |          |           |           |
|--------------|---------------|-----------|---|-----------|----------|-----------|-----------|
| NM_019798    | Pde4a         | -0.771259 | 1 | -1.11321  | 5.17863  | 2.26891   | No change |
| NM_001122989 | Cdc14b        | -0.771177 | 1 | -0.968704 | 10.9615  | 5.32498   | No change |
| NM_019428    | Rpp30         | -0.769877 | 1 | -1.40072  | 5.96851  | 2.1115    | No change |
| NM_001044371 | Rad17         | -0.768965 | 1 | -0.984026 | 19.1213  | 9.1884    | No change |
| NM_016867    | Gipc2         | -0.768584 | 1 | -1.55992  | 3.63903  | 1.13593   | No change |
| NM_026391    | Ppp2r2d       | -0.768551 | 1 | -1.02102  | 18.6029  | 8.70723   | No change |
| NM_011351    | Sema6c        | -0.767761 | 1 | -2.34558  | 0.784444 | 0.126259  | No change |
| NM_177601    | Tmem60        | -0.767353 | 1 | -1.07879  | 28.9009  | 12.9792   | No change |
| NM_007870    | Dnase1l3      | -0.766402 | 1 | -2.4222   | 0.527549 | 0.0776328 | No change |
| NM_177861    | Tmem67        | -0.766145 | 1 | -1.05191  | 8.71666  | 3.9907    | No change |
| NM_011247    | Rbbp6         | -0.765736 | 1 | -0.90678  | 18.9888  | 9.63544   | No change |
| NM_177630    | Ldoc1l        | -0.763841 | 1 | -1.13206  | 4.20425  | 1.81667   | No change |
| NM_028777    | Sec14l1       | -0.763632 | 1 | -0.992892 | 15.984   | 7.63201   | No change |
| NM_001110163 | Pde4dip       | -0.763357 | 1 | -0.898842 | 15.4544  | 7.88567   | No change |
| NM_023060    | Eefsec        | -0.761811 | 1 | -1.04027  | 11.7846  | 5.43993   | No change |
| NM_021286    | Sez6          | -0.760759 | 1 | -2.62311  | 0.323757 | 0.0351056 | No change |
| NM_001039087 | Rapgef1       | -0.757685 | 1 | -1.01914  | 5.68603  | 2.66445   | No change |
| NM_020028    | Lpar2         | -0.757377 | 1 | -1.36614  | 1.28359  | 0.46593   | No change |
| NM_177566    | Arhgef15      | -0.756486 | 1 | -1.49022  | 1.26377  | 0.416582  | No change |
| NM_178202    | Hist1h2bp     | -0.756269 | 1 | -0.975627 | 83.7723  | 40.4882   | No change |
| NM_001025613 | Otd7b         | -0.755379 | 1 | -0.938192 | 8.73205  | 4.33351   | No change |
| NM_178211    | Hist1h4k      | -0.754788 | 1 | -1.01421  | 115.485  | 54.3034   | No change |
| NM_001110020 | Gm6900        | -0.754312 | 1 | -1.56422  | 6.33572  | 1.9683    | No change |
| NM_026689    | Mul1          | -0.753659 | 1 | -0.990365 | 11.5034  | 5.50167   | No change |
| NM_008563    | Mcm3          | -0.752183 | 1 | -1.18292  | 4.78143  | 1.99005   | No change |
| NM_019696    | Cpxm1         | -0.752166 | 1 | -1.11934  | 7.68609  | 3.35084   | No change |
| NM_001098231 | Pdp1          | -0.751754 | 1 | -1.02008  | 8.13     | 3.8067    | No change |
| NM_001195529 | Gm4980        | -0.751272 | 1 | -2.20807  | 0.89497  | 0.165471  | No change |
| NR_003652    | Gm7337        | -0.750689 | 1 | -1.51233  | 1.83817  | 0.595102  | No change |
| NM_001099633 | Dnahc9        | -0.750354 | 1 | -1.15434  | 1.12832  | 0.47951   | No change |
| NM_024219    | Hsbp1         | -0.750256 | 1 | -0.891313 | 100.322  | 51.4553   | No change |
| NM_009015    | Rad54l        | -0.749615 | 1 | -1.24081  | 3.51298  | 1.4008    | No change |
| NM_008636    | Mtf1          | -0.748471 | 1 | -0.930716 | 9.29726  | 4.63805   | No change |
| NM_001123372 | Gm3435        | -0.748247 | 1 | -0.975782 | 22.8745  | 11.053    | No change |
| NM_019702    | Hbs1l         | -0.747332 | 1 | -0.950434 | 20.586   | 10.1273   | No change |
| NM_199012    | Fchs2         | -0.746346 | 1 | -1.36319  | 1.61158  | 0.585916  | No change |
| NM_001205071 | Josd2         | -0.744536 | 1 | -1.4222   | 6.38295  | 2.21719   | No change |
| NR_027956    | 1700052K11Rik | -0.743815 | 1 | -1.09845  | 8.20257  | 3.62971   | No change |
| NM_019421    | Cd320         | -0.74351  | 1 | -0.972234 | 20.665   | 10.0098   | No change |
| NM_199032    | Cep135        | -0.74293  | 1 | -1.11994  | 3.31809  | 1.44555   | No change |
| NM_026231    | Gstdc         | -0.741934 | 1 | -1.03895  | 10.5644  | 4.87926   | No change |
| NR_027899    | 1700109F18Rik | -0.741462 | 1 | -1.13798  | 20.1881  | 8.68002   | No change |
| NM_028850    | Chic2         | -0.740517 | 1 | -1.07427  | 19.8766  | 8.94973   | No change |
| NM_027933    | Ranbp3        | -0.74012  | 1 | -0.984255 | 16.2214  | 7.79015   | No change |
| NM_011991    | Cops3         | -0.738976 | 1 | -0.892254 | 63.1509  | 32.3655   | No change |
| NM_133747    | Fam98a        | -0.737056 | 1 | -0.921551 | 24.468   | 12.2837   | No change |
| NM_001143849 | Pde2a         | -0.737032 | 1 | -1.43634  | 1.39351  | 0.478488  | No change |
| NM_001030306 | Fam193a       | -0.737024 | 1 | -0.93581  | 13.037   | 6.47939   | No change |
| NM_173431    | Rpgrip1l      | -0.736906 | 1 | -0.939519 | 8.25035  | 4.08969   | No change |
| NM_012048    | Polk          | -0.736895 | 1 | -0.947874 | 12.583   | 6.20059   | No change |
| NM_001127346 | Ndufaf2       | -0.736557 | 1 | -1.07744  | 31.2593  | 14.0415   | No change |
| NM_020255    | Scand1        | -0.734807 | 1 | -1.39394  | 8.25311  | 2.92832   | No change |
| NM_138674    | Pkhd1l1       | -0.734695 | 1 | -1.64103  | 0.289954 | 0.0845329 | No change |
| NM_148932    | Pom121        | -0.734692 | 1 | -1.02365  | 5.2073   | 2.43119   | No change |
| NM_001122963 | Gpbp1         | -0.733277 | 1 | -0.835219 | 61.48    | 32.7934   | No change |
| NM_022029    | Nrgn          | -0.732413 | 1 | -2.24872  | 1.88651  | 0.333137  | No change |
| NM_146105    | Cnst          | -0.732227 | 1 | -0.989239 | 7.989    | 3.82253   | No change |
| NM_177249    | Usp47         | -0.731524 | 1 | -0.830292 | 41.6042  | 22.268    | No change |
| NM_134003    | Zc3h10        | -0.730802 | 1 | -1.06052  | 10.8092  | 4.91437   | No change |
| NM_001033300 | Gmps          | -0.73071  | 1 | -0.871525 | 25.4539  | 13.2358   | No change |
| NM_028047    | 1500002O20Rik | -0.730299 | 1 | -1.04124  | 11.3032  | 5.21064   | No change |
| NM_010492    | Ica1          | -0.729885 | 1 | -0.908214 | 35.3671  | 17.9218   | No change |
| NM_025571    | Pam16         | -0.729113 | 1 | -1.13007  | 28.2812  | 12.2253   | No change |
| NM_008713    | Nos3          | -0.728884 | 1 | -1.60604  | 0.92969  | 0.278597  | No change |
| NM_028718    | Traf3ip1      | -0.728047 | 1 | -1.08469  | 5.55552  | 2.48192   | No change |
| NM_028476    | Atat1         | -0.727954 | 1 | -1.12318  | 8.11203  | 3.52415   | No change |
| NM_023727    | Rd3           | -0.727909 | 1 | -1.15496  | 3.7282   | 1.58249   | No change |
| NR_015540    | 4933400F21Rik | -0.726873 | 1 | -1.07057  | 5.77075  | 2.60444   | No change |
| NM_175104    | Fam53c        | -0.726319 | 1 | -0.953052 | 10.2943  | 5.05344   | No change |
| NM_025517    | Rtcd1         | -0.726176 | 1 | -0.953259 | 29.4408  | 14.4502   | No change |
| NM_172722    | Naa25         | -0.72604  | 1 | -1.04562  | 7.69877  | 3.53753   | No change |
| NM_018886    | Lgals8        | -0.725629 | 1 | -0.859091 | 46.0961  | 24.1787   | No change |
| NM_001038993 | Rnf38         | -0.725582 | 1 | -0.847465 | 31.0168  | 16.4023   | No change |
| NM_019816    | Aatf          | -0.724965 | 1 | -0.949691 | 26.0187  | 12.8027   | No change |
| NM_013715    | Cops5         | -0.724964 | 1 | -0.879895 | 77.6803  | 40.1543   | No change |
| NM_178192    | Hist1h4a      | -0.724315 | 1 | -0.979073 | 117.942  | 56.8345   | No change |

|              |               |           |   |           |          |           |           |
|--------------|---------------|-----------|---|-----------|----------|-----------|-----------|
| NM_018739    | Rp9           | -0.723891 | 1 | -0.937746 | 45.1385  | 22.3993   | No change |
| NM_001099302 | Gm5640        | -0.723028 | 1 | -1.28911  | 2.87444  | 1.10409   | No change |
| NM_011188    | Psmc2         | -0.721732 | 1 | -0.935933 | 28.7845  | 14.3018   | No change |
| NM_028336    | Tmem107       | -0.720849 | 1 | -1.28145  | 6.61119  | 2.55383   | No change |
| NM_007563    | Bpgm          | -0.720656 | 1 | -0.926683 | 26.7246  | 13.3653   | No change |
| NM_001033148 | 1700029J07Rik | -0.719452 | 1 | -0.97193  | 13.6334  | 6.60267   | No change |
| NM_028430    | Ppil6         | -0.719243 | 1 | -1.34558  | 6.38309  | 2.3483    | No change |
| NM_026191    | Dhx40         | -0.718461 | 1 | -0.840341 | 41.172   | 21.8804   | No change |
| NM_001164224 | Aspscr1       | -0.718455 | 1 | -0.984409 | 21.751   | 10.4406   | No change |
| NM_031998    | Tsga14        | -0.718143 | 1 | -0.966464 | 11.4024  | 5.54362   | No change |
| NM_173784    | Ubd2          | -0.715762 | 1 | -1.01135  | 9.10238  | 4.28567   | No change |
| NM_008467    | Kpna4         | -0.715353 | 1 | -0.835082 | 42.5527  | 22.6972   | No change |
| NM_009203    | Slc22a12      | -0.71486  | 1 | -2.47111  | 0.711468 | 0.0955938 | No change |
| NM_170673    | Cpne9         | -0.71486  | 1 | -2.47111  | 0.576804 | 0.0775001 | No change |
| NM_178662    | Atcay         | -0.71486  | 1 | -2.47111  | 0.435936 | 0.058573  | No change |
| NM_008990    | Pvrl2         | -0.713849 | 1 | -0.975046 | 12.7664  | 6.16851   | No change |
| NM_028151    | Skiv2l2       | -0.713491 | 1 | -0.837056 | 45.0087  | 23.9737   | No change |
| NM_152803    | Hpse          | -0.712905 | 1 | -1.4032   | 1.85426  | 0.652222  | No change |
| NM_173870    | Mgat4a        | -0.712296 | 1 | -1.08116  | 2.56878  | 1.15004   | No change |
| NM_001007589 | Akirin2       | -0.711797 | 1 | -0.979657 | 19.3389  | 9.3132    | No change |
| NM_001164053 | Pkig          | -0.710638 | 1 | -0.95783  | 33.7537  | 16.5094   | No change |
| NM_030689    | Nptxr         | -0.710371 | 1 | -1.16743  | 2.45031  | 1.02994   | No change |
| NM_145427    | Atpaf2        | -0.708834 | 1 | -0.987074 | 16.5722  | 7.93824   | No change |
| NM_001081238 | Palb2         | -0.708824 | 1 | -1.43363  | 1.39497  | 0.47899   | No change |
| NM_008443    | Kif3a         | -0.708369 | 1 | -1.00344  | 5.0751   | 2.40271   | No change |
| NM_015805    | Atp9b         | -0.70826  | 1 | -0.832843 | 27.082   | 14.4672   | No change |
| NM_001014836 | 4930404N11Rik | -0.708017 | 1 | -1.10228  | 22.9636  | 10.123    | No change |
| NM_054078    | Baz2a         | -0.707965 | 1 | -0.828913 | 18.5121  | 9.9164    | No change |
| NM_001007580 | Fndc3c1       | -0.707632 | 1 | -2.37157  | 0.391045 | 0.0596766 | No change |
| NM_001042617 | Cadps         | -0.707632 | 1 | -2.37157  | 0.344635 | 0.0525941 | No change |
| NM_025636    | Ntpcr         | -0.70574  | 1 | -1.13875  | 11.5853  | 4.97253   | No change |
| NM_001038627 | Smurf1        | -0.70493  | 1 | -0.897423 | 11.7353  | 5.99043   | No change |
| NM_025956    | 1700011H14Rik | -0.70475  | 1 | -0.97515  | 27.8891  | 13.4723   | No change |
| NM_019681    | Ncs1          | -0.704521 | 1 | -1.25538  | 2.12447  | 0.836227  | No change |
| NM_001168304 | Cdk19         | -0.703261 | 1 | -0.949339 | 6.70886  | 3.30088   | No change |
| NM_001082536 | Mkl1          | -0.701443 | 1 | -1.09599  | 3.63948  | 1.61143   | No change |
| NM_080562    | Ubox5         | -0.701295 | 1 | -1.05105  | 5.41047  | 2.47488   | No change |
| NM_027556    | Cep192        | -0.699755 | 1 | -0.881819 | 8.59429  | 4.43537   | No change |
| NM_177192    | Dennd5b       | -0.699514 | 1 | -0.870824 | 7.95944  | 4.13968   | No change |
| NM_001166033 | Gtf3c4        | -0.698245 | 1 | -0.866449 | 11.3742  | 5.93389   | No change |
| NM_013614    | Odc1          | -0.69823  | 1 | -0.821428 | 58.4195  | 31.4561   | No change |
| NM_001081270 | Dscaml1       | -0.69648  | 1 | -1.6935   | 0.485877 | 0.135553  | No change |
| NM_133839    | Mmadhc        | -0.696264 | 1 | -0.859482 | 65.946   | 34.5722   | No change |
| NM_023320    | Plekho1       | -0.695477 | 1 | -1.16878  | 8.31389  | 3.4891    | No change |
| NM_175265    | 6720463M24Rik | -0.694339 | 1 | -1.16133  | 5.04537  | 2.129     | No change |
| NM_016860    | Actr1a        | -0.694212 | 1 | -0.792601 | 84.2059  | 46.2635   | No change |
| NM_008231    | Hdgf          | -0.694096 | 1 | -0.826167 | 57.7411  | 30.9868   | No change |
| NM_001164597 | Znf512b       | -0.694011 | 1 | -0.842789 | 19.1227  | 10.1432   | No change |
| NM_011283    | Rp1           | -0.693999 | 1 | -1.38572  | 0.751882 | 0.267734  | No change |
| NM_009261    | Strbp         | -0.693883 | 1 | -0.785897 | 16.1102  | 8.89263   | No change |
| NM_001163019 | A430005L14Rik | -0.693759 | 1 | -1.02275  | 22.6874  | 10.5897   | No change |
| NM_011416    | Smarca2       | -0.692813 | 1 | -0.851964 | 15.49    | 8.1634    | No change |
| NM_183174    | Homez         | -0.690872 | 1 | -0.957137 | 5.9403   | 2.90595   | No change |
| NM_030266    | Inpp4a        | -0.690702 | 1 | -1.13212  | 2.25448  | 0.971854  | No change |
| NM_027494    | Zcchc8        | -0.690312 | 1 | -0.906494 | 11.5938  | 5.87929   | No change |
| NM_197997    | 4930422G04Rik | -0.690129 | 1 | -1.01406  | 3.25326  | 1.5279    | No change |
| NM_007415    | Parp1         | -0.688291 | 1 | -0.94767  | 9.14185  | 4.50218   | No change |
| NM_009171    | Shmt1         | -0.687108 | 1 | -0.990096 | 12.5886  | 6.01445   | No change |
| NM_145495    | Rin1          | -0.687048 | 1 | -1.26724  | 1.85247  | 0.722036  | No change |
| NM_134101    | Psm2          | -0.686437 | 1 | -0.814262 | 46.509   | 25.1668   | No change |
| NM_178748    | Egflam        | -0.685974 | 1 | -0.913112 | 9.43728  | 4.76303   | No change |
| NM_001134802 | Apol7e        | -0.685292 | 1 | -2.05607  | 1.37696  | 0.29013   | No change |
| NM_176979    | Topbp1        | -0.684899 | 1 | -0.913453 | 8.71332  | 4.39651   | No change |
| NM_028794    | Nudt9         | -0.684565 | 1 | -0.931192 | 28.8385  | 14.369    | No change |
| NM_001146048 | Lrrc1         | -0.684492 | 1 | -0.834897 | 32.2748  | 17.2132   | No change |
| NM_025821    | Carhsp1       | -0.683808 | 1 | -0.887961 | 19.423   | 9.97867   | No change |
| NM_026367    | Gpatch2       | -0.683802 | 1 | -0.913802 | 9.66723  | 4.87655   | No change |
| NM_019935    | Ovol1         | -0.683428 | 1 | -1.13612  | 4.20561  | 1.80715   | No change |
| NM_198014    | Slain1        | -0.68324  | 1 | -1.39804  | 1.93309  | 0.681228  | No change |
| NM_175251    | Arid2         | -0.682776 | 1 | -0.803538 | 17.0199  | 9.279     | No change |
| NM_026613    | Ccdc34        | -0.682671 | 1 | -1.12715  | 6.06754  | 2.62439   | No change |
| NR_026990    | Gm5577        | -0.682272 | 1 | -1.12152  | 9.06057  | 3.93513   | No change |
| NM_029409    | Mff           | -0.68182  | 1 | -0.854838 | 40.8442  | 21.4796   | No change |
| NM_010587    | Itsn1         | -0.681297 | 1 | -1.08447  | 1.0821   | 0.482853  | No change |
| NM_027088    | Bap1          | -0.680081 | 1 | -0.92553  | 11.3768  | 5.691     | No change |
| NM_146178    | Ccdc106       | -0.67884  | 1 | -1.38257  | 2.7126   | 0.967244  | No change |

|              |               |           |   |           |          |           |           |
|--------------|---------------|-----------|---|-----------|----------|-----------|-----------|
| NR_033484    | Gm10046       | -0.678509 | 1 | -1.49495  | 6.61642  | 2.15827   | No change |
| NM_138596    | Med10         | -0.677638 | 1 | -0.958209 | 34.7656  | 16.99     | No change |
| NM_010047    | Dgcr6         | -0.677459 | 1 | -0.951734 | 24.7957  | 12.1737   | No change |
| NM_001009573 | Unc13d        | -0.676631 | 1 | -1.74029  | 0.808136 | 0.217165  | No change |
| NM_011870    | Cib1          | -0.676344 | 1 | -0.880684 | 65.7795  | 33.9656   | No change |
| NM_008750    | Nxn           | -0.676165 | 1 | -0.842644 | 30.018   | 15.9214   | No change |
| NM_025907    | Mettl6        | -0.676035 | 1 | -0.931768 | 18.7677  | 9.34602   | No change |
| NM_027373    | Afap1         | -0.675909 | 1 | -1.02166  | 3.04387  | 1.42128   | No change |
| NM_177088    | Ccdc45        | -0.675909 | 1 | -1.02166  | 7.38587  | 3.4487    | No change |
| NM_144913    | Mepce         | -0.675524 | 1 | -0.884246 | 16.6858  | 8.59406   | No change |
| NM_022981    | Zfp110        | -0.67541  | 1 | -0.793825 | 44.8517  | 24.6181   | No change |
| NM_172814    | Lrp12         | -0.674913 | 1 | -1.06884  | 3.87564  | 1.74885   | No change |
| NM_025686    | Brf2          | -0.674427 | 1 | -1.12203  | 8.96988  | 3.89322   | No change |
| NM_001081203 | Sbno1         | -0.67416  | 1 | -0.748458 | 39.521   | 22.3906   | No change |
| NM_009746    | Bcl7c         | -0.673824 | 1 | -1.09651  | 14.2997  | 6.32356   | No change |
| NM_001033226 | Calr4         | -0.67333  | 1 | -2.54911  | 0.782578 | 0.0895708 | No change |
| NM_001081358 | Lrrc7         | -0.67333  | 1 | -2.54911  | 0.211976 | 0.0242619 | No change |
| NM_001161837 | Ptpr          | -0.67333  | 1 | -2.54911  | 0.438627 | 0.0502035 | No change |
| NM_009575    | Zic3          | -0.67333  | 1 | -2.54911  | 0.310898 | 0.0355841 | No change |
| NM_183281    | 2310005G13Rik | -0.67333  | 1 | -2.54911  | 0.409023 | 0.0468151 | No change |
| NM_001115009 | Synrg         | -0.672952 | 1 | -0.902188 | 11.0253  | 5.6067    | No change |
| NM_028407    | Gcap14        | -0.672424 | 1 | -0.805996 | 22.4985  | 12.2438   | No change |
| NM_001080926 | Lrp8          | -0.672267 | 1 | -0.925215 | 4.99581  | 2.4993    | No change |
| NM_001080929 | Cdr2l         | -0.671592 | 1 | -1.47111  | 1.16783  | 0.388059  | No change |
| NM_134040    | Ddx1          | -0.670369 | 1 | -0.775114 | 81.8306  | 45.5054   | No change |
| NM_027678    | Zranb3        | -0.670135 | 1 | -1.0487   | 4.07689  | 1.8665    | No change |
| NM_025435    | Thoc7         | -0.669707 | 1 | -0.890395 | 53.5917  | 27.4806   | No change |
| NM_028012    | Xrcc4         | -0.669628 | 1 | -0.952448 | 19.0113  | 9.32772   | No change |
| NM_053011    | Lrp1b         | -0.668811 | 1 | -1.91857  | 0.207996 | 0.048695  | No change |
| NM_001161624 | Cdkn1c        | -0.66724  | 1 | -1.28207  | 3.55283  | 1.3678    | No change |
| NM_001004153 | AU018091      | -0.667038 | 1 | -2.6935   | 0.262763 | 0.020821  | No change |
| NM_001081327 | Hs3st2        | -0.667038 | 1 | -3.6935   | 0.399123 | 0         | No change |
| NM_001163611 | Nps           | -0.667038 | 1 | -3.6935   | 1.0535   | 0         | No change |
| NM_001170918 | Olfrc1507     | -0.667038 | 1 | -3.6935   | 0.564491 | 0         | No change |
| NM_001201390 | LOC100502936  | -0.667038 | 1 | -3.6935   | 0.500281 | 0         | No change |
| NM_009426    | Trh           | -0.667038 | 1 | -3.6935   | 0.656052 | 0         | No change |
| NM_009877    | Cdkn2a        | -0.667038 | 1 | -3.6935   | 0.975251 | 0         | No change |
| NM_009892    | Chi3l3        | -0.667038 | 1 | -3.6935   | 0.588699 | 0         | No change |
| NM_010095    | Ebf2          | -0.667038 | 1 | -3.6935   | 0.208661 | 0         | No change |
| NM_010172    | F7            | -0.667038 | 1 | -2.6935   | 0.487363 | 0.0386181 | No change |
| NM_013731    | Sgk2          | -0.667038 | 1 | -2.6935   | 0.356415 | 0.0282419 | No change |
| NM_021879    | Oca2          | -0.667038 | 1 | -3.6935   | 0.290387 | 0         | No change |
| NM_025631    | Bpil1         | -0.667038 | 1 | -3.6935   | 0.523704 | 0         | No change |
| NM_053256    | Pth2          | -0.667038 | 1 | -3.6935   | 1.59228  | 0         | No change |
| NM_130456    | Nphs2         | -0.667038 | 1 | -2.6935   | 0.291508 | 0.0230988 | No change |
| NM_133190    | Cacng8        | -0.667038 | 1 | -3.6935   | 1.16904  | 0         | No change |
| NM_182959    | Slc17a8       | -0.667038 | 1 | -3.6935   | 0.203506 | 0         | No change |
| NM_207270    | Ptprh         | -0.667038 | 1 | -3.6935   | 0.225375 | 0         | No change |
| NM_213727    | Fam123c       | -0.667038 | 1 | -3.6935   | 0.207991 | 0         | No change |
| NR_002873    | Vax2os1       | -0.667038 | 1 | -3.6935   | 0.427766 | 0         | No change |
| NR_029549    | Mir135a-1     | -0.667038 | 1 | -2.6935   | 10.0668  | 0.797677  | No change |
| NR_030470_5  | Mir669a-2     | -0.667038 | 1 | -2.6935   | 9.53693  | 0.755694  | No change |
| NR_030471    | Mir669a-3     | -0.667038 | 1 | -2.6935   | 8.312    | 0.658633  | No change |
| NR_033647    | Mageb16-ps1   | -0.667038 | 1 | -2.6935   | 0.260198 | 0.0206177 | No change |
| NR_036591    | 1700028M03Rik | -0.667038 | 1 | -3.6935   | 1.93591  | 0         | No change |
| NR_037698    | 1500009C09Rik | -0.667038 | 1 | -3.6935   | 0.583768 | 0         | No change |
| NM_024239    | Stambp        | -0.666852 | 1 | -1.00814  | 9.53149  | 4.49318   | No change |
| NM_026808    | Fitm1         | -0.666382 | 1 | -2.13407  | 2.82745  | 0.551027  | No change |
| NM_008399    | Itgae         | -0.666355 | 1 | -0.962902 | 6.99473  | 3.40614   | No change |
| NM_009229    | Sntb2         | -0.665949 | 1 | -0.955819 | 6.33429  | 3.10018   | No change |
| NM_028048    | Slc25a35      | -0.665934 | 1 | -1.03379  | 9.7654   | 4.51886   | No change |
| NM_009532    | Xrcc1         | -0.665845 | 1 | -1.10854  | 5.85356  | 2.56515   | No change |
| NM_028903    | Scara5        | -0.665793 | 1 | -0.994812 | 5.80468  | 2.76265   | No change |
| NM_178620    | Mfsd11        | -0.665534 | 1 | -0.916345 | 11.8961  | 5.98836   | No change |
| NM_172503    | Zswim4        | -0.665065 | 1 | -1.03751  | 4.00718  | 1.84926   | No change |
| NM_010925    | Rrp1          | -0.663775 | 1 | -0.754818 | 132.167  | 74.5439   | No change |
| NM_001013780 | Slc25a34      | -0.663434 | 1 | -2.25538  | 0.779563 | 0.133839  | No change |
| NM_148942    | Serpinc6c     | -0.663318 | 1 | -1.19693  | 6.71739  | 2.75703   | No change |
| NM_178210    | Hist1h4j      | -0.663294 | 1 | -0.925018 | 109.007  | 54.5335   | No change |
| NM_011634    | Traip         | -0.662986 | 1 | -1.66375  | 1.21452  | 0.346045  | No change |
| NM_001033243 | Ccdc114       | -0.662139 | 1 | -1.31748  | 2.5002   | 0.936531  | No change |
| NM_001039231 | Zfp951        | -0.661029 | 1 | -1.05934  | 5.28159  | 2.3988    | No change |
| NM_001081963 | 9430020K01Rik | -0.66098  | 1 | -0.811234 | 14.7545  | 7.99929   | No change |
| NM_010065    | Dnm1          | -0.660571 | 1 | -1.24872  | 1.9707   | 0.777862  | No change |
| NM_001081243 | Filip1        | -0.659651 | 1 | -1.06994  | 3.44572  | 1.55288   | No change |
| NM_001164682 | Mpp4          | -0.659559 | 1 | -1.42867  | 1.5425   | 0.529645  | No change |

|              |               |           |   |           |          |           |           |
|--------------|---------------|-----------|---|-----------|----------|-----------|-----------|
| NM_026940    | Ydjc          | -0.659559 | 1 | -1.42867  | 3.48465  | 1.19652   | No change |
| NM_001166218 | Zfp712        | -0.658053 | 1 | -1.14353  | 2.66834  | 1.13925   | No change |
| NM_001160330 | Mocs3         | -0.657564 | 1 | -1.13294  | 6.54666  | 2.81701   | No change |
| NM_133945    | Vrk3          | -0.657564 | 1 | -1.13294  | 6.28509  | 2.70445   | No change |
| NM_011256    | Pitpnm2       | -0.657322 | 1 | -0.956535 | 3.96892  | 1.94118   | No change |
| NM_030713    | Zfp202        | -0.657277 | 1 | -1.10854  | 3.12782  | 1.37027   | No change |
| NM_153168    | Lars2         | -0.656892 | 1 | -0.696948 | 345.987  | 203.164   | No change |
| NM_012001    | Cops4         | -0.655858 | 1 | -0.840153 | 37.9854  | 20.1784   | No change |
| NM_001145676 | 2210408I21Rik | -0.655764 | 1 | -0.93323  | 6.12453  | 3.04568   | No change |
| NM_176833    | Ppm1f         | -0.655645 | 1 | -0.944444 | 5.69354  | 2.80877   | No change |
| NM_029342    | Nhej1         | -0.655281 | 1 | -1.28608  | 6.98415  | 2.67877   | No change |
| NM_183154    | Zfyve1        | -0.65499  | 1 | -0.832477 | 18.5175  | 9.89005   | No change |
| NM_008788    | Pcolce        | -0.653465 | 1 | -0.945955 | 17.7968  | 8.76979   | No change |
| NM_001081655 | Dact3         | -0.652285 | 1 | -1.33681  | 1.99616  | 0.736187  | No change |
| NM_053168    | Trim11        | -0.651834 | 1 | -0.905889 | 15.9068  | 8.06533   | No change |
| NM_027323    | Srrd          | -0.650232 | 1 | -1.07879  | 11.9814  | 5.36332   | No change |
| NM_011994    | Abcd2         | -0.649826 | 1 | -1.39204  | 0.880597 | 0.311008  | No change |
| NM_011130    | Polb          | -0.648913 | 1 | -0.794471 | 85.6536  | 46.983    | No change |
| NM_009499    | Vasp          | -0.648858 | 1 | -0.869172 | 20.8986  | 10.8755   | No change |
| NM_026543    | 3010026O09Rik | -0.648188 | 1 | -1.10854  | 10.2094  | 4.47119   | No change |
| NM_009011    | Rad23b        | -0.647932 | 1 | -0.760135 | 45.8646  | 25.7702   | No change |
| NM_019746    | Pcdcd5        | -0.647503 | 1 | -0.883706 | 64.048   | 32.9881   | No change |
| NM_011123    | Plp1          | -0.647367 | 1 | -1.24284  | 2.8502   | 1.12923   | No change |
| NM_008187    | Gtl3          | -0.64713  | 1 | -0.858739 | 39.2629  | 20.583    | No change |
| NM_198103    | Exoc8         | -0.646817 | 1 | -0.863554 | 6.54871  | 3.42139   | No change |
| NM_175391    | Apol7c        | -0.64642  | 1 | -2.3191   | 0.886505 | 0.140491  | No change |
| NM_175231    | Whsc1         | -0.645873 | 1 | -0.811651 | 11.7801  | 6.38396   | No change |
| NM_011249    | Rbl1          | -0.644985 | 1 | -0.933451 | 5.73757  | 2.85223   | No change |
| NM_134029    | Nt5m          | -0.644364 | 1 | -1.05963  | 10.7795  | 4.89234   | No change |
| NM_145377    | Trim41        | -0.644191 | 1 | -0.806584 | 24.4227  | 13.2824   | No change |
| NM_001199676 | Camkk2        | -0.643903 | 1 | -0.960822 | 4.79068  | 2.33526   | No change |
| NM_028235    | Ttc30b        | -0.643773 | 1 | -0.872427 | 16.7231  | 8.68195   | No change |
| NM_029756    | Sdccag8       | -0.64341  | 1 | -1.02988  | 6.14703  | 2.85081   | No change |
| NM_153802    | Zfp128        | -0.643002 | 1 | -1.06721  | 3.52738  | 1.59203   | No change |
| NM_001142410 | Gm14124       | -0.64275  | 1 | -2.40971  | 0.508033 | 0.0713628 | No change |
| NM_007419    | Adrb1         | -0.64275  | 1 | -2.40971  | 0.615514 | 0.0864604 | No change |
| NM_080437    | Celsr3        | -0.64275  | 1 | -2.40971  | 0.132783 | 0.0186519 | No change |
| NM_145993    | L3mbtl2       | -0.641398 | 1 | -0.972445 | 6.27846  | 3.0349    | No change |
| NM_010864    | Myo5a         | -0.641228 | 1 | -0.983558 | 1.72995  | 0.829563  | No change |
| NM_001191026 | Dync1i1       | -0.641001 | 1 | -1.5266   | 1.33335  | 0.422611  | No change |
| NM_009421    | Traf1         | -0.641001 | 1 | -1.5266   | 1.55872  | 0.494045  | No change |
| NM_201230    | Fgfr1op       | -0.640689 | 1 | -0.868055 | 14.2584  | 7.42505   | No change |
| NM_178193    | Hist1h4b      | -0.64014  | 1 | -0.901034 | 108.56   | 55.2238   | No change |
| NM_053089    | Naa15         | -0.639736 | 1 | -0.833558 | 9.85314  | 5.2576    | No change |
| NM_025830    | Wwp2          | -0.639469 | 1 | -0.878638 | 9.34449  | 4.82967   | No change |
| NM_181750    | R3hdm1        | -0.637987 | 1 | -0.847671 | 10.7031  | 5.65436   | No change |
| NM_173408    | Dcun1d3       | -0.637686 | 1 | -0.815553 | 12.5613  | 6.78811   | No change |
| NM_001162477 | Gab2          | -0.637667 | 1 | -0.880965 | 6.44123  | 3.32355   | No change |
| NM_025513    | Exosc3        | -0.637391 | 1 | -0.937324 | 25.0733  | 12.428    | No change |
| NM_019460    | Sfmbt1        | -0.637226 | 1 | -0.813825 | 9.32983  | 5.04795   | No change |
| NM_053271    | Rims2         | -0.63599  | 1 | -0.968331 | 4.44292  | 2.15373   | No change |
| NM_001177713 | Cyp26b1       | -0.635607 | 1 | -1.05791  | 2.89152  | 1.31362   | No change |
| NM_009376    | Ift88         | -0.634874 | 1 | -0.969448 | 6.83575  | 3.31092   | No change |
| NM_025471    | 1810030N24Rik | -0.6339   | 1 | -0.888994 | 38.0417  | 19.516    | No change |
| NM_172560    | Cntrob        | -0.633742 | 1 | -0.970596 | 5.25785  | 2.54449   | No change |
| NM_207239    | Gtf3c1        | -0.633473 | 1 | -0.760247 | 19.9065  | 11.183    | No change |
| NM_011048    | Pcsk6         | -0.631754 | 1 | -1.88615  | 0.697254 | 0.167033  | No change |
| NM_025427    | 1190002H23Rik | -0.631449 | 1 | -1.38865  | 5.10878  | 1.80656   | No change |
| NM_001012396 | Ptpla         | -0.630747 | 1 | -1.30699  | 6.45014  | 2.43085   | No change |
| NR_024200    | Rnu1b2        | -0.629629 | 1 | -0.692483 | 463.529  | 273.014   | No change |
| NM_001081068 | Ltn1          | -0.629407 | 1 | -0.744545 | 21.3033  | 12.0997   | No change |
| NM_172662    | Gtdc1         | -0.628946 | 1 | -0.919397 | 10.7514  | 5.39697   | No change |
| NM_025769    | Efcab1        | -0.628704 | 1 | -1.63338  | 2.84209  | 0.827378  | No change |
| NM_148938    | Slc1a3        | -0.628629 | 1 | -1.29554  | 1.39187  | 0.52913   | No change |
| NM_019439    | Gabbr1        | -0.628163 | 1 | -1.18383  | 1.81767  | 0.752157  | No change |
| NM_027530    | Rufy3         | -0.627982 | 1 | -1.1117   | 2.62369  | 1.14551   | No change |
| NM_133932    | Tada3         | -0.627556 | 1 | -0.906609 | 16.0192  | 8.11483   | No change |
| NM_025445    | Arfgap3       | -0.627461 | 1 | -0.785034 | 34.0745  | 18.8115   | No change |
| NM_001199045 | Tubd1         | -0.627341 | 1 | -1.05234  | 6.46427  | 2.94794   | No change |
| NM_001081682 | Gnb1l         | -0.62732  | 1 | -1.16792  | 2.40186  | 1.00576   | No change |
| NR_027010    | Gt(ROSA)26Sor | -0.627107 | 1 | -1.129    | 16.2964  | 7.02432   | No change |
| NM_025739    | Rnf220        | -0.625803 | 1 | -0.813571 | 21.9372  | 11.87     | No change |
| NM_021567    | Pcbp4         | -0.625053 | 1 | -1.27442  | 3.03763  | 1.1734    | No change |
| NM_207220    | Gpr137        | -0.625026 | 1 | -0.865825 | 21.2667  | 11.0897   | No change |
| NM_007996    | Fdx1          | -0.625006 | 1 | -0.969201 | 23.0691  | 11.173    | No change |
| NM_001113384 | Gnao1         | -0.624882 | 1 | -1.062    | 2.11226  | 0.956416  | No change |

|                |               |           |   |           |          |           |           |
|----------------|---------------|-----------|---|-----------|----------|-----------|-----------|
| NM_145396      | Tbl3          | -0.624823 | 1 | -0.855772 | 16.9037  | 8.87753   | No change |
| NM_178071      | Nme7          | -0.624399 | 1 | -1.06406  | 5.26647  | 2.38098   | No change |
| NM_001012401   | Hspb6         | -0.623443 | 1 | -1.06835  | 9.25733  | 4.172     | No change |
| NM_001081106   | Cytl1         | -0.622035 | 1 | -2.0956   | 2.57592  | 0.515952  | No change |
| NM_010816      | Morc1         | -0.622035 | 1 | -2.0956   | 0.822605 | 0.164766  | No change |
| NM_001081292   | Map3k10       | -0.62154  | 1 | -0.98409  | 4.87284  | 2.33467   | No change |
| NM_001159941   | Kctd10        | -0.620952 | 1 | -0.853087 | 13.5652  | 7.13739   | No change |
| NM_001164497   | Papd5         | -0.618108 | 1 | -0.820029 | 11.8767  | 6.3966    | No change |
| NM_001025365   | Miip          | -0.618039 | 1 | -0.874604 | 19.105   | 9.89947   | No change |
| NM_177644      | Rasal2        | -0.617484 | 1 | -0.794997 | 7.01369  | 3.84467   | No change |
| NM_028812      | Gtf2e1        | -0.616913 | 1 | -0.908513 | 8.86545  | 4.484     | No change |
| NM_177278      | L3mbtl4       | -0.616485 | 1 | -1.20135  | 1.61651  | 0.659786  | No change |
| NM_029231      | Pelp1         | -0.615585 | 1 | -0.94984  | 6.07787  | 2.98433   | No change |
| NM_008090      | Gata2         | -0.615183 | 1 | -1.13821  | 2.79373  | 1.19541   | No change |
| NM_007696      | Ovgp1         | -0.615038 | 1 | -1.17155  | 3.20173  | 1.33631   | No change |
| NM_001113351   | Synj2         | -0.61454  | 1 | -0.896612 | 7.22767  | 3.68666   | No change |
| NM_011258      | Rfc1          | -0.614332 | 1 | -0.746594 | 26.4449  | 14.997    | No change |
| NM_025892      | 1500031L02Rik | -0.613285 | 1 | -0.896714 | 16.7984  | 8.56765   | No change |
| NM_207302      | Zranb1        | -0.613131 | 1 | -0.813775 | 26.0816  | 14.1084   | No change |
| NM_001195049   | Pak3          | -0.613107 | 1 | -1.06672  | 1.367    | 0.616589  | No change |
| NM_001159948   | Als2          | -0.612821 | 1 | -0.840631 | 6.49883  | 3.44932   | No change |
| NM_017378      | Pcdh12        | -0.611775 | 1 | -1.38495  | 0.798344 | 0.282692  | No change |
| NM_001004155   | 9930012K11Rik | -0.611162 | 1 | -1.53     | 1.71951  | 0.542228  | No change |
| NM_016866      | Stk39         | -0.610632 | 1 | -0.707002 | 71.41    | 41.633    | No change |
| NM_019921      | Akap10        | -0.610571 | 1 | -0.788723 | 18.1296  | 9.98133   | No change |
| NM_001042707   | Ilf3          | -0.610485 | 1 | -0.829397 | 13.7021  | 7.33032   | No change |
| NM_001085515   | Al464131      | -0.610143 | 1 | -1.01673  | 3.45709  | 1.61715   | No change |
| NM_001085508   | Tmem8b        | -0.60857  | 1 | -0.925916 | 4.81748  | 2.40607   | No change |
| NM_001081078   | Lct           | -0.608375 | 1 | -2.20807  | 0.327781 | 0.0582152 | No change |
| NM_183014      | Zfp184        | -0.607976 | 1 | -1.02079  | 5.18249  | 2.41694   | No change |
| NM_133798      | Exd2          | -0.607848 | 1 | -0.865722 | 10.2767  | 5.35786   | No change |
| NM_145705      | Tinf2         | -0.60772  | 1 | -0.905615 | 14.917   | 7.55912   | No change |
| NM_001081373   | Cep164        | -0.607239 | 1 | -0.768565 | 15.3914  | 8.59451   | No change |
| NM_028771      | Ccdc97        | -0.606963 | 1 | -0.920702 | 7.86555  | 3.94297   | No change |
| NM_001080967   | Tmsb15b2      | -0.606807 | 1 | -1.04997  | 30.4366  | 13.895    | No change |
| NR_028142      | Pnpla2        | -0.606659 | 1 | -0.88966  | 10.5168  | 5.39027   | No change |
| NM_001177438   | Aldh3b2       | -0.605456 | 1 | -1.05399  | 5.54705  | 2.52481   | No change |
| NM_030016      | Ccdc76        | -0.605342 | 1 | -0.990168 | 5.05213  | 2.40894   | No change |
| NM_019570      | Rev1          | -0.604565 | 1 | -0.792835 | 14.6679  | 8.05164   | No change |
| NM_175091      | Tnks          | -0.604114 | 1 | -0.724374 | 23.231   | 13.38     | No change |
| NM_007589      | Calm2         | -0.603453 | 1 | -0.683501 | 273.957  | 162.356   | No change |
| NM_001033219   | Slc45a4       | -0.602995 | 1 | -0.870447 | 6.84618  | 3.55707   | No change |
| NM_026282      | Spc24         | -0.602974 | 1 | -1.44557  | 2.84145  | 0.957923  | No change |
| NM_145630      | Pdk3          | -0.602796 | 1 | -0.811556 | 25.5773  | 13.8557   | No change |
| NM_021530      | Slc4a8        | -0.601677 | 1 | -0.94213  | 1.70199  | 0.840088  | No change |
| NM_027603      | 4921511H03Rik | -0.601576 | 1 | -0.850723 | 34.7798  | 18.3252   | No change |
| NM_033398      | Jmjd6         | -0.601449 | 1 | -0.815658 | 29.1641  | 15.7527   | No change |
| NM_153808      | Smc5          | -0.601129 | 1 | -0.712378 | 50.9396  | 29.5857   | No change |
| NM_010813      | Mnt           | -0.600755 | 1 | -0.882656 | 6.26112  | 3.2248    | No change |
| NM_029985      | Lrrc42        | -0.600534 | 1 | -0.996118 | 8.6124   | 4.08832   | No change |
| NM_026447      | Ppm1m         | -0.599901 | 1 | -0.970679 | 9.47546  | 4.58155   | No change |
| NM_009088      | Polr1a        | -0.599727 | 1 | -0.870097 | 5.08724  | 2.64369   | No change |
| NM_008910      | Ppm1a         | -0.599121 | 1 | -0.743169 | 37.6327  | 21.3906   | No change |
| NM_025831      | 1300014I06Rik | -0.597461 | 1 | -1.30761  | 2.75496  | 1.03545   | No change |
| NM_016714      | Nup50         | -0.597157 | 1 | -0.776916 | 14.3524  | 7.9667    | No change |
| NM_019927      | Arih1         | -0.596614 | 1 | -0.707889 | 26.9999  | 15.7304   | No change |
| NM_011652      | Ttn           | -0.596484 | 1 | -0.69771  | 2.05774  | 1.20741   | No change |
| NM_144514      | Commd1        | -0.595637 | 1 | -0.847226 | 43.5368  | 22.9942   | No change |
| NM_001166581   | BC005561      | -0.595503 | 1 | -0.783607 | 12.0392  | 6.65116   | No change |
| NM_001164089   | Cops7a        | -0.595356 | 1 | -0.795071 | 42.0479  | 23.0427   | No change |
| NM_026545      | Psmd8         | -0.594457 | 1 | -0.709505 | 107.464  | 62.5383   | No change |
| NM_026944      | Alkbh3        | -0.594319 | 1 | -0.866605 | 24.8539  | 12.9469   | No change |
| NM_001099310   | Gm8787        | -0.593736 | 1 | -1.85298  | 2.10583  | 0.516482  | No change |
| NM_198620      | Rundc3b       | -0.592621 | 1 | -1.2718   | 1.51713  | 0.586049  | No change |
| NM_001033273   | 5031439G07Rik | -0.592258 | 1 | -0.803683 | 9.87501  | 5.37862   | No change |
| NM_021313      | Rnf25         | -0.592041 | 1 | -0.809377 | 31.9406  | 17.3272   | No change |
| NM_001146275   | Iigp1         | -0.591559 | 1 | -0.903219 | 7.56513  | 3.83897   | No change |
| NM_011103      | Prkcd         | -0.590606 | 1 | -0.720408 | 46.1857  | 26.6726   | No change |
| NM_001163528   | Itprip1       | -0.589412 | 1 | -0.957698 | 4.90013  | 2.39099   | No change |
| NM_001102650   | Nt5c3l        | -0.589216 | 1 | -0.837419 | 26.0353  | 13.8454   | No change |
| NM_028379      | Zdhhc4        | -0.588755 | 1 | -0.790948 | 40.6019  | 22.3134   | No change |
| NM_001166250   | Mgll          | -0.58843  | 1 | -1.14667  | 6.59883  | 2.80247   | No change |
| NM_001025388_2 | Gm5506        | -0.587789 | 1 | -0.684492 | 129.418  | 76.6395   | No change |
| NM_153391      | Wdr19         | -0.587762 | 1 | -0.941007 | 4.22621  | 2.08704   | No change |
| NM_019978      | Dclk1         | -0.587282 | 1 | -1.36258  | 0.559248 | 0.201172  | No change |
| NM_010154      | Erbp4         | -0.587276 | 1 | -2.12318  | 0.523884 | 0.101185  | No change |

|              |               |           |   |           |          |           |           |
|--------------|---------------|-----------|---|-----------|----------|-----------|-----------|
| NM_013633    | Pou5f1        | -0.587276 | 1 | -2.12318  | 1.65689  | 0.320019  | No change |
| NM_001081392 | Mdn1          | -0.586819 | 1 | -0.7111   | 7.75746  | 4.50917   | No change |
| NM_001159349 | Fytd1         | -0.586102 | 1 | -0.693636 | 43.0652  | 25.34     | No change |
| NM_019750    | Nat6          | -0.585132 | 1 | -0.854296 | 15.592   | 8.19236   | No change |
| NM_018770    | Cadm1         | -0.584961 | 1 | -0.797123 | 11.3007  | 6.18319   | No change |
| NM_173755    | Ube2o         | -0.583998 | 1 | -0.851531 | 6.06726  | 3.19409   | No change |
| NM_011588    | Trim28        | -0.583258 | 1 | -0.722776 | 34.2231  | 19.7303   | No change |
| NM_001166063 | Ccdc152       | -0.582564 | 1 | -2.26466  | 2.18336  | 0.359854  | No change |
| NM_030558    | Car15         | -0.582564 | 1 | -2.26466  | 1.57676  | 0.259877  | No change |
| NM_001039354 | Lin7a         | -0.582523 | 1 | -0.81949  | 6.74791  | 3.63406   | No change |
| NM_019713    | Rassf1        | -0.581846 | 1 | -0.827685 | 22.4149  | 12.0014   | No change |
| NM_172625    | Ino80c        | -0.581732 | 1 | -0.795633 | 20.4944  | 11.2249   | No change |
| NM_026893    | Dcaf12        | -0.581702 | 1 | -0.727447 | 29.4793  | 16.9397   | No change |
| NM_030243    | Rbm43         | -0.581153 | 1 | -0.87477  | 13.5028  | 6.99143   | No change |
| NM_010643    | Klk1b24       | -0.580411 | 1 | -2.47111  | 1.3988   | 0.169518  | No change |
| NR_024324    | E130201H02Rik | -0.580411 | 1 | -2.47111  | 1.39222  | 0.168721  | No change |
| NM_133925    | Rbm28         | -0.579828 | 1 | -0.767927 | 14.801   | 8.26642   | No change |
| NM_011274    | C80913        | -0.579786 | 1 | -0.735263 | 25.991   | 14.8533   | No change |
| NM_020586    | Herpud2       | -0.579725 | 1 | -0.808143 | 15.5184  | 8.42445   | No change |
| NM_021886    | Cenph         | -0.579337 | 1 | -1.47111  | 2.81247  | 0.927083  | No change |
| NM_001008785 | Kbtbd8        | -0.579225 | 1 | -0.88211  | 5.27887  | 2.71889   | No change |
| NM_023742    | Dtx2          | -0.57878  | 1 | -1.02875  | 4.59723  | 2.12963   | No change |
| NM_001081024 | Setdb2        | -0.57819  | 1 | -0.945524 | 5.67375  | 2.79213   | No change |
| NM_026921    | Isca1         | -0.576501 | 1 | -0.725681 | 50.6957  | 29.1663   | No change |
| NM_007931    | Endog         | -0.576424 | 1 | -0.978794 | 14.0466  | 6.74779   | No change |
| NM_027141    | Spsb3         | -0.575155 | 1 | -0.776071 | 33.4133  | 18.5537   | No change |
| NM_198654    | Nsl1          | -0.574265 | 1 | -1.41958  | 1.26587  | 0.434658  | No change |
| NM_001195617 | Dcdc2a        | -0.573182 | 1 | -1.25388  | 2.34987  | 0.919219  | No change |
| NM_173400    | Haus6         | -0.572877 | 1 | -0.886145 | 6.28085  | 3.22525   | No change |
| NM_177391    | Fam109b       | -0.572495 | 1 | -1.53384  | 1.1679   | 0.366147  | No change |
| NM_172806    | Btdb7         | -0.572314 | 1 | -0.729555 | 20.3123  | 11.6539   | No change |
| NM_009055    | Rfx1          | -0.572262 | 1 | -0.997791 | 3.12382  | 1.47987   | No change |
| NM_001005426 | Zcwpw1        | -0.572075 | 1 | -1.16625  | 3.17357  | 1.32706   | No change |
| NR_033540    | F630042J09Rik | -0.571699 | 1 | -2.00162  | 0.83702  | 0.18152   | No change |
| NM_133771    | Memo1         | -0.571635 | 1 | -0.803413 | 27.5238  | 14.9904   | No change |
| NM_008136    | Gn11          | -0.571431 | 1 | -0.860415 | 9.85454  | 5.15409   | No change |
| NM_199035    | Alg8          | -0.571295 | 1 | -1.18571  | 3.30876  | 1.36335   | No change |
| NM_010212    | Fhl2          | -0.571174 | 1 | -1.19281  | 4.1468   | 1.69947   | No change |
| NR_002889_2  | Gm5801        | -0.57082  | 1 | -0.9005   | 17.7017  | 8.99651   | No change |
| NM_134135    | Slc39a3       | -0.570231 | 1 | -0.870291 | 7.26723  | 3.77411   | No change |
| NR_037603    | Kat5          | -0.570037 | 1 | -0.775114 | 27.663   | 15.3702   | No change |
| NM_009837    | Cct4          | -0.569648 | 1 | -0.738368 | 38.7459  | 22.0923   | No change |
| NM_023764    | Tollip        | -0.569303 | 1 | -0.675172 | 51.1082  | 30.4603   | No change |
| NM_024258    | Usp16         | -0.569289 | 1 | -0.775619 | 17.668   | 9.81315   | No change |
| NM_133916    | Eif3b         | -0.568948 | 1 | -0.733141 | 27.0689  | 15.491    | No change |
| NM_139200    | Cytip         | -0.568408 | 1 | -1.09002  | 1.55548  | 0.688492  | No change |
| NR_028341    | Taf1b         | -0.56779  | 1 | -1.00296  | 6.49403  | 3.06448   | No change |
| NM_011055    | Pde3b         | -0.56733  | 1 | -0.769373 | 10.152   | 5.66342   | No change |
| NM_001039520 | Dnm2          | -0.567055 | 1 | -0.752692 | 18.1486  | 10.2441   | No change |
| NM_001163566 | Crb2          | -0.566938 | 1 | -2.34558  | 0.229685 | 0.0337999 | No change |
| NM_139299    | Il31ra        | -0.566938 | 1 | -2.34558  | 0.399114 | 0.0587327 | No change |
| NM_197993    | Tut1          | -0.566624 | 1 | -0.835296 | 11.2776  | 6.00434   | No change |
| NM_181594    | Edc4          | -0.566613 | 1 | -0.798539 | 8.85418  | 4.83862   | No change |
| NM_001080930 | Atxn1l        | -0.566353 | 1 | -0.724819 | 11.4179  | 6.57241   | No change |
| NM_001035854 | Ap2b1         | -0.564727 | 1 | -0.654407 | 48.4204  | 29.2791   | No change |
| NM_001039159 | Ube2j2        | -0.564258 | 1 | -0.873508 | 7.40025  | 3.83393   | No change |
| NM_001173506 | Mtap1a        | -0.562969 | 1 | -1.03102  | 0.942205 | 0.435512  | No change |
| NM_001083331 | Nup88         | -0.56272  | 1 | -0.693299 | 51.0892  | 30.0643   | No change |
| NM_001167829 | Fam45a        | -0.561798 | 1 | -0.776521 | 20.4381  | 11.3435   | No change |
| NM_172281    | Rnf40         | -0.561467 | 1 | -0.738507 | 16.6431  | 9.48802   | No change |
| NM_181452    | Fam89b        | -0.561123 | 1 | -0.841219 | 23.576   | 12.4983   | No change |
| NM_029759    | Fam54b        | -0.561003 | 1 | -0.689606 | 70.6094  | 41.6584   | No change |
| NM_134071    | Ankrd32       | -0.560985 | 1 | -0.765086 | 14.0243  | 7.84674   | No change |
| NM_001190733 | Dcun1d4       | -0.560982 | 1 | -0.815062 | 8.56     | 4.62304   | No change |
| NM_023119    | Eno1          | -0.559178 | 1 | -0.68988  | 70.2423  | 41.4334   | No change |
| NM_139143    | Slc39a6       | -0.558537 | 1 | -0.713599 | 23.0155  | 13.3522   | No change |
| NM_027310    | Meaf6         | -0.558265 | 1 | -1.01488  | 12.968   | 6.06453   | No change |
| NM_178741    | Klhl8         | -0.557812 | 1 | -0.877156 | 7.02879  | 3.63154   | No change |
| NM_011670    | Uchl1         | -0.557017 | 1 | -1.01654  | 9.78253  | 4.56909   | No change |
| NM_001081341 | Scaper        | -0.556228 | 1 | -0.680572 | 26.1199  | 15.5076   | No change |
| NR_002702    | Npm3-ps1      | -0.556109 | 1 | -0.848475 | 26.6473  | 14.0524   | No change |
| NM_023732    | Abcb6         | -0.554777 | 1 | -0.827252 | 10.2413  | 5.48284   | No change |
| NM_177645    | 1110028C15Rik | -0.55127  | 1 | -0.721488 | 16.0529  | 9.26085   | No change |
| NM_001081231 | Lhfpl3        | -0.551175 | 1 | -2.15916  | 0.654613 | 0.120414  | No change |
| NM_020506    | Xpo4          | -0.55075  | 1 | -0.769821 | 13.1884  | 7.35359   | No change |
| NM_001081252 | Uggt2         | -0.550498 | 1 | -0.787292 | 6.02351  | 3.31733   | No change |

|              |               |           |   |           |           |           |           |
|--------------|---------------|-----------|---|-----------|-----------|-----------|-----------|
| NM_027829    | Izumo4        | -0.549921 | 1 | -0.922982 | 17.609    | 8.80167   | No change |
| NM_027248    | Zfp219        | -0.548172 | 1 | -0.781002 | 13.782    | 7.62382   | No change |
| NM_001097979 | Hist1h2bq     | -0.547584 | 1 | -0.745833 | 26.024    | 14.7576   | No change |
| NM_001110555 | Hist1h2br     | -0.547584 | 1 | -0.745833 | 26.024    | 14.7576   | No change |
| NM_033570    | Cnm4          | -0.547405 | 1 | -0.91614  | 3.68086   | 1.84883   | No change |
| NM_001163160 | Pcyt1a        | -0.547279 | 1 | -0.726389 | 13.7531   | 7.90656   | No change |
| NM_011790    | Arih2         | -0.547266 | 1 | -0.690363 | 26.5057   | 15.6282   | No change |
| NM_133750    | Fam118a       | -0.546924 | 1 | -0.771023 | 17.1152   | 9.53452   | No change |
| NM_170755    | Fam134a       | -0.546715 | 1 | -0.717586 | 28.7821   | 16.6492   | No change |
| NM_022328    | Milt1         | -0.546146 | 1 | -0.798853 | 9.57819   | 5.23165   | No change |
| NM_001122780 | Kihl25        | -0.54523  | 1 | -0.779589 | 11.8358   | 6.55353   | No change |
| NM_178728    | Napepld       | -0.545145 | 1 | -0.843076 | 6.86873   | 3.63548   | No change |
| NM_010564    | Inha          | -0.544538 | 1 | -0.897116 | 12.5285   | 6.37924   | No change |
| NM_001039180 | Bicd2         | -0.540921 | 1 | -0.790204 | 7.81546   | 4.29478   | No change |
| NM_009058    | Ralgds        | -0.538558 | 1 | -0.698961 | 22.1159   | 12.9607   | No change |
| NM_026865    | 1700113I22Rik | -0.538025 | 1 | -0.934819 | 10.0175   | 4.96296   | No change |
| NM_010846    | Mx1           | -0.537037 | 1 | -1.31678  | 1.52375   | 0.566094  | No change |
| NM_001001446 | Cyp2c44       | -0.536955 | 1 | -3.58658  | 0.425822  | 0         | No change |
| NM_001004194 | Nlrp4e        | -0.536955 | 1 | -3.58658  | 0.247284  | 0         | No change |
| NM_001012305 | Slc39a12      | -0.536955 | 1 | -3.58658  | 0.312524  | 0         | No change |
| NM_001034869 | Gm4981        | -0.536955 | 1 | -3.58658  | 0.461288  | 0         | No change |
| NM_001081310 | Fam23a        | -0.536955 | 1 | -3.58658  | 0.228626  | 0         | No change |
| NM_001081406 | Lrr1          | -0.536955 | 1 | -2.58658  | 0.557172  | 0.0478288 | No change |
| NM_001081653 | Cntnap5c      | -0.536955 | 1 | -3.58658  | 0.213455  | 0         | No change |
| NM_001085524 | Gm5634        | -0.536955 | 1 | -3.58658  | 0.993249  | 0         | No change |
| NM_001100446 | Gm4297        | -0.536955 | 1 | -3.58658  | 0.324279  | 0         | No change |
| NM_001110240 | Slc24a2       | -0.536955 | 1 | -3.58658  | 0.0796339 | 0         | No change |
| NM_001122660 | Gm10639       | -0.536955 | 1 | -3.58658  | 0.956882  | 0         | No change |
| NM_001145863 | Gm14139       | -0.536955 | 1 | -2.58658  | 0.483979  | 0.0415457 | No change |
| NM_001159297 | Gcet2         | -0.536955 | 1 | -3.58658  | 0.248607  | 0         | No change |
| NM_001195074 | Kcnmb3        | -0.536955 | 1 | -2.58658  | 1.16155   | 0.0997097 | No change |
| NM_009243    | Serpina1a     | -0.536955 | 1 | -3.58658  | 0.5361    | 0         | No change |
| NM_009699    | Aqp2          | -0.536955 | 1 | -2.58658  | 0.590618  | 0.0506998 | No change |
| NM_010253    | Gal           | -0.536955 | 1 | -3.58658  | 1.19645   | 0         | No change |
| NM_016689    | Aqp3          | -0.536955 | 1 | -3.58658  | 0.474371  | 0         | No change |
| NM_020015    | Magea1        | -0.536955 | 1 | -3.58658  | 0.657481  | 0         | No change |
| NM_023898    | Pde6h         | -0.536955 | 1 | -3.58658  | 1.49877   | 0         | No change |
| NM_024449    | Sost          | -0.536955 | 1 | -3.58658  | 0.404799  | 0         | No change |
| NM_028325    | Zcchc12       | -0.536955 | 1 | -2.58658  | 0.382054  | 0.0327962 | No change |
| NM_173024    | Serpina3b     | -0.536955 | 1 | -3.58658  | 0.404017  | 0         | No change |
| NM_173421    | BC030476      | -0.536955 | 1 | -2.58658  | 0.351985  | 0.0302151 | No change |
| NR_033549    | Gm11190       | -0.536955 | 1 | -3.58658  | 0.244966  | 0         | No change |
| NR_035408_10 | Mir669a-1     | -0.536955 | 1 | -2.58658  | 8.62181   | 0.740113  | No change |
| NR_037250_10 | Mir669a-4     | -0.536955 | 1 | -2.58658  | 9.61282   | 0.825184  | No change |
| NR_037251_10 | Mir669a-5     | -0.536955 | 1 | -2.58658  | 9.61282   | 0.825184  | No change |
| NR_037253_10 | Mir669a-6     | -0.536955 | 1 | -2.58658  | 9.61282   | 0.825184  | No change |
| NR_037255_10 | Mir669a-7     | -0.536955 | 1 | -2.58658  | 9.61282   | 0.825184  | No change |
| NR_037259_10 | Mir669a-8     | -0.536955 | 1 | -2.58658  | 9.61282   | 0.825184  | No change |
| NR_037260_10 | Mir669a-9     | -0.536955 | 1 | -2.58658  | 9.61282   | 0.825184  | No change |
| NR_037264_10 | Mir669a-10    | -0.536955 | 1 | -2.58658  | 9.61282   | 0.825184  | No change |
| NR_037266_10 | Mir669a-11    | -0.536955 | 1 | -2.58658  | 9.61282   | 0.825184  | No change |
| NR_037268_10 | Mir669a-12    | -0.536955 | 1 | -2.58658  | 9.61282   | 0.825184  | No change |
| NM_023229    | Fastk         | -0.536771 | 1 | -0.758351 | 24.0895   | 13.5388   | No change |
| NM_133840    | Clp1          | -0.536687 | 1 | -0.791555 | 18.5086   | 10.1606   | No change |
| NM_146159    | Haus3         | -0.536217 | 1 | -0.891726 | 9.21619   | 4.71002   | No change |
| NM_172679    | 4932438A13Rik | -0.535591 | 1 | -0.630864 | 14.4581   | 8.8863    | No change |
| NM_001195229 | Nek10         | -0.535538 | 1 | -2.07879  | 0.645305  | 0.128658  | No change |
| NM_007837    | Ddit3         | -0.534885 | 1 | -0.831697 | 29.0454   | 15.4956   | No change |
| NR_037920    | Zfa           | -0.534287 | 1 | -0.957306 | 3.79032   | 1.84725   | No change |
| NR_027872    | 4930515G01Rik | -0.534054 | 1 | -1.27317  | 3.73256   | 1.43467   | No change |
| NM_172877    | Pramef8       | -0.529718 | 1 | -0.777621 | 9.1739    | 5.08566   | No change |
| NM_028872    | 5730559C18Rik | -0.529666 | 1 | -0.959726 | 4.19837   | 2.04225   | No change |
| NM_144792    | Sgms1         | -0.529341 | 1 | -0.632142 | 54.6801   | 33.5768   | No change |
| NM_001042528 | Cacna1b       | -0.529117 | 1 | -2.01543  | 0.339284  | 0.0719554 | No change |
| NM_013648    | Rtn2          | -0.529117 | 1 | -2.01543  | 1.21703   | 0.258108  | No change |
| NM_144926    | Sez6l2        | -0.529117 | 1 | -2.01543  | 0.72508   | 0.153775  | No change |
| NM_172684    | Rsbm1         | -0.529025 | 1 | -0.699318 | 10.93     | 6.40324   | No change |
| NM_031396    | Cnm1          | -0.528348 | 1 | -1.96415  | 0.511635  | 0.113954  | No change |
| NM_026577    | Arl13b        | -0.528092 | 1 | -0.743187 | 13.2701   | 7.53764   | No change |
| NM_001013375 | Utp18         | -0.527133 | 1 | -0.740051 | 18.2434   | 10.3854   | No change |
| NM_153053    | Sf3b4         | -0.526725 | 1 | -0.857194 | 12.1152   | 6.3457    | No change |
| NM_175123    | 1110051M20Rik | -0.526331 | 1 | -0.785382 | 16.5164   | 9.10537   | No change |
| NM_029865    | Ocel1         | -0.526042 | 1 | -1.06835  | 4.93588   | 2.21631   | No change |
| NM_172414    | Fam164c       | -0.525655 | 1 | -0.772829 | 7.9769    | 4.43688   | No change |
| NR_037999    | 4930558J18Rik | -0.523124 | 1 | -0.930089 | 6.75872   | 3.35864   | No change |
| NM_080288    | Elmo1         | -0.522875 | 1 | -0.940012 | 2.37476   | 1.17162   | No change |

|                |               |           |   |           |          |           |           |
|----------------|---------------|-----------|---|-----------|----------|-----------|-----------|
| NM_001198790   | Ak1           | -0.522459 | 1 | -0.724279 | 25.3034  | 14.5648   | No change |
| NM_001100596_2 | Gm2002        | -0.522    | 1 | -0.921421 | 5.35699  | 2.67877   | No change |
| NM_010550_2    | Il1ra2        | -0.522    | 1 | -0.921421 | 5.35699  | 2.67877   | No change |
| NM_025884      | Zfp830        | -0.521813 | 1 | -0.848426 | 6.3995   | 3.37273   | No change |
| NM_019758      | Mtch2         | -0.521375 | 1 | -0.707392 | 25.5157  | 14.8625   | No change |
| NM_001177364   | Heatr7b1      | -0.521313 | 1 | -0.660077 | 14.5109  | 8.73778   | No change |
| NM_028341      | Ttc39c        | -0.521222 | 1 | -0.951734 | 5.23062  | 2.55859   | No change |
| NM_028334      | Nup37         | -0.520659 | 1 | -1.14601  | 4.8623   | 2.05912   | No change |
| NM_027695      | Oxsm          | -0.519456 | 1 | -0.84419  | 5.64676  | 2.98491   | No change |
| NR_027827      | A030009H04Rik | -0.518288 | 1 | -1.15916  | 3.36908  | 1.41241   | No change |
| NM_009949      | Cpt2          | -0.517575 | 1 | -0.745789 | 17.6753  | 10.0202   | No change |
| NM_001190453   | Dctn2         | -0.517301 | 1 | -0.687994 | 37.853   | 22.3507   | No change |
| NM_001024508   | Brd9          | -0.516228 | 1 | -0.836314 | 9.03373  | 4.80197   | No change |
| NM_029291      | Ascc2         | -0.515504 | 1 | -0.922857 | 5.29923  | 2.64667   | No change |
| NM_001042653   | Oip5          | -0.51509  | 1 | -1.36614  | 2.32757  | 0.829953  | No change |
| NM_001081400   | 1810013L24Rik | -0.514883 | 1 | -0.664056 | 23.2139  | 13.9388   | No change |
| NR_027926      | 4930507D05Rik | -0.514623 | 1 | -1.78427  | 1.27061  | 0.327215  | No change |
| NM_001002764   | Smg6          | -0.514293 | 1 | -0.68951  | 11.922   | 7.03178   | No change |
| NM_001100606   | Adat3         | -0.514126 | 1 | -1.18993  | 3.85262  | 1.57726   | No change |
| NM_178399      | 3110035E14Rik | -0.513259 | 1 | -1.19874  | 1.66196  | 0.675786  | No change |
| NM_008566      | Mcm5          | -0.513222 | 1 | -1.09914  | 2.05698  | 0.902107  | No change |
| NM_145513      | Tipr1         | -0.512654 | 1 | -0.714731 | 11.9247  | 6.90957   | No change |
| NM_024255      | Hsd12         | -0.512588 | 1 | -0.715363 | 19.9009  | 11.5261   | No change |
| NM_134097      | Topors        | -0.512459 | 1 | -0.654284 | 27.1371  | 16.4062   | No change |
| NM_023190      | Acin1         | -0.512118 | 1 | -0.624124 | 34.9421  | 21.5752   | No change |
| NM_025429      | Serp1b1a      | -0.510817 | 1 | -1.27846  | 2.25285  | 0.860893  | No change |
| NM_019933      | Ptpn4         | -0.509919 | 1 | -0.672805 | 16.8975  | 10.0837   | No change |
| NM_027745      | Ccdc57        | -0.509761 | 1 | -0.752879 | 10.8137  | 6.09906   | No change |
| NM_011045      | Pcna          | -0.509324 | 1 | -0.718268 | 38.9395  | 22.5059   | No change |
| NM_178374      | Snupn         | -0.509146 | 1 | -0.945039 | 9.06321  | 4.4534    | No change |
| NM_030014      | Hook1         | -0.508914 | 1 | -0.627665 | 34.756   | 21.4069   | No change |
| NM_133872      | Kdm1a         | -0.50887  | 1 | -0.659276 | 30.7897  | 18.549    | No change |
| NM_008625      | Mrc1          | -0.508572 | 1 | -0.812564 | 4.49505  | 2.42993   | No change |
| NM_011807      | Dlg2          | -0.508312 | 1 | -1.11356  | 0.912966 | 0.395979  | No change |
| NM_177700      | Atmin         | -0.508258 | 1 | -0.70493  | 11.3035  | 6.5947    | No change |
| NM_144802      | Hnrp11        | -0.5082   | 1 | -0.678139 | 23.4845  | 13.9619   | No change |
| NM_027295      | Rab28         | -0.508197 | 1 | -0.722187 | 28.6269  | 16.4996   | No change |
| NM_027961      | Wfdc3         | -0.506561 | 1 | -0.892748 | 18.5281  | 9.4554    | No change |
| NM_207650      | Dtna          | -0.505889 | 1 | -0.989981 | 1.57666  | 0.749597  | No change |
| NM_001079824   | Hnrp3         | -0.505697 | 1 | -0.723121 | 20.9272  | 12.0535   | No change |
| NM_001122736   | Igf2          | -0.505048 | 1 | -1.1243   | 1.71361  | 0.737113  | No change |
| NM_170591      | Nupl1         | -0.504134 | 1 | -0.658544 | 36.7678  | 22.161    | No change |
| NM_013813      | Epb4.113      | -0.504062 | 1 | -0.739304 | 9.63124  | 5.48416   | No change |
| NM_175451      | Ckap4         | -0.503333 | 1 | -0.72169  | 15.4209  | 8.89075   | No change |
| NM_009147      | Sec23a        | -0.502881 | 1 | -0.625542 | 33.5741  | 20.7089   | No change |
| NM_019939      | Mpp6          | -0.501441 | 1 | -0.735678 | 17.9987  | 10.2747   | No change |
| NM_146193      | Btbd1         | -0.500928 | 1 | -0.608668 | 59.2193  | 36.96     | No change |
| NM_011972      | Poli          | -0.500277 | 1 | -0.807017 | 9.43466  | 5.11966   | No change |
| NM_177586      | Eif5a2        | -0.499947 | 1 | -0.812589 | 4.52334  | 2.4448    | No change |
| NM_001042557   | Map2k7        | -0.499617 | 1 | -0.886145 | 8.81829  | 4.52095   | No change |
| NM_025670      | 5730403B10Rik | -0.499572 | 1 | -0.61875  | 37.3853  | 23.1691   | No change |
| NM_026549      | Pdcd2l        | -0.498443 | 1 | -0.867998 | 12.8196  | 6.65871   | No change |
| NM_133762      | Ncapg2        | -0.498009 | 1 | -0.9005   | 2.12118  | 1.07621   | No change |
| NR_033224      | D330050L16Rik | -0.497591 | 1 | -1.04661  | 4.5417   | 2.0701    | No change |
| NM_178281      | Trim39        | -0.497332 | 1 | -0.695356 | 17.6389  | 10.3594   | No change |
| NR_033512      | Gm6194        | -0.49688  | 1 | -0.917509 | 7.53107  | 3.77406   | No change |
| NM_029036      | S100pbp       | -0.496368 | 1 | -0.755441 | 20.8718  | 11.7485   | No change |
| NM_033583      | Pcdhgc5       | -0.496154 | 1 | -0.730553 | 8.3063   | 4.75861   | No change |
| NM_146042      | Rnf144b       | -0.494323 | 1 | -0.744673 | 7.52367  | 4.2673    | No change |
| NM_001160319   | Ubr4          | -0.49345  | 1 | -0.594113 | 12.7557  | 8.04211   | No change |
| NM_001029982   | Sec23ip       | -0.493191 | 1 | -0.648439 | 18.9421  | 11.4972   | No change |
| NM_172256      | Dync2li1      | -0.492728 | 1 | -1.17988  | 3.93894  | 1.62301   | No change |
| NM_026456      | Tceb1         | -0.492609 | 1 | -0.685978 | 59.2572  | 35.031    | No change |
| NM_026824      | Dus1l         | -0.492203 | 1 | -0.702388 | 25.2267  | 14.7418   | No change |
| NM_001033168   | 1700066B19Rik | -0.491674 | 1 | -2.10854  | 0.751481 | 0.143353  | No change |
| NM_013724      | Nrk           | -0.491674 | 1 | -2.10854  | 0.285021 | 0.0543706 | No change |
| NM_025639      | Cenpm         | -0.491674 | 1 | -2.10854  | 1.56288  | 0.298135  | No change |
| NM_177473      | Tmem191c      | -0.491011 | 1 | -0.966316 | 7.27618  | 3.51817   | No change |
| NM_022423      | Rnf187        | -0.489752 | 1 | -0.640826 | 47.085   | 28.7312   | No change |
| NM_011432      | Snrpc         | -0.488528 | 1 | -0.901252 | 17.5149  | 8.87941   | No change |
| NM_021334      | Ilgax         | -0.488524 | 1 | -1.65873  | 0.692601 | 0.196199  | No change |
| NM_147151      | Ehmt2         | -0.488028 | 1 | -0.654475 | 20.1674  | 12.1888   | No change |
| NM_007740      | Col9a1        | -0.487025 | 1 | -2.27846  | 0.358503 | 0.0553943 | No change |
| NM_008685      | Nfe2          | -0.487025 | 1 | -2.27846  | 0.835647 | 0.12912   | No change |
| NM_001037166   | Gm4925        | -0.486897 | 1 | -1.2301   | 2.90201  | 1.14976   | No change |
| NM_001033192   | C78339        | -0.486744 | 1 | -0.861271 | 11.5566  | 6.03023   | No change |



|              |               |           |   |           |          |          |           |
|--------------|---------------|-----------|---|-----------|----------|----------|-----------|
| NM_199316    | 4922501C03Rik | -0.485278 | 1 | -0.670054 | 11.6352  | 6.95539  | No change |
| NM_016749    | Mybph         | -0.485001 | 1 | -1.26947  | 2.24816  | 0.863533 | No change |
| NM_029669    | Dnajc18       | -0.483943 | 1 | -0.65048  | 14.5806  | 8.83667  | No change |
| NM_024176    | Drap1         | -0.483587 | 1 | -0.644466 | 87.9531  | 53.5297  | No change |
| NM_001190444 | Aamp          | -0.483235 | 1 | -0.569784 | 149.112  | 95.6161  | No change |
| NM_001136259 | Tom1          | -0.482875 | 1 | -0.775846 | 10.7584  | 5.96736  | No change |
| NM_172392    | Zfp759        | -0.482631 | 1 | -0.765555 | 7.78591  | 4.35034  | No change |
| NM_007713    | Clk3          | -0.482569 | 1 | -0.660506 | 26.547   | 15.9759  | No change |
| NM_001162947 | Nek3          | -0.481919 | 1 | -2.03299  | 1.05118  | 0.216564 | No change |
| NM_009118    | Sag           | -0.481919 | 1 | -2.03299  | 1.21699  | 0.250725 | No change |
| NM_018757    | Nme6          | -0.481279 | 1 | -0.831697 | 17.6102  | 9.38536  | No change |
| NR_028384    | 4930528A17Rik | -0.481045 | 1 | -0.931093 | 5.32057  | 2.63888  | No change |
| NM_001033630 | 2310061I04Rik | -0.480986 | 1 | -0.849925 | 13.2079  | 6.94751  | No change |
| NM_011858    | Odz4          | -0.480722 | 1 | -0.78661  | 2.19572  | 1.20856  | No change |
| NM_025923    | Fancl         | -0.480612 | 1 | -0.956535 | 5.73249  | 2.79075  | No change |
| NM_001032727 | Sybu          | -0.480371 | 1 | -1.97361  | 0.787087 | 0.171984 | No change |
| NR_015533    | A230057D06Rik | -0.480371 | 1 | -1.97361  | 1.14764  | 0.250767 | No change |
| NR_033592    | 4933417G07Rik | -0.480371 | 1 | -1.97361  | 2.3932   | 0.522931 | No change |
| NR_033803    | 6030408B16Rik | -0.480371 | 1 | -1.97361  | 1.16923  | 0.255484 | No change |
| NM_009507    | Vhl           | -0.479646 | 1 | -0.674972 | 20.2186  | 12.0441  | No change |
| NM_145564    | Fbxo21        | -0.479582 | 1 | -0.722055 | 9.30665  | 5.36274  | No change |
| NM_025430    | Mrpl35        | -0.479406 | 1 | -0.748336 | 8.07269  | 4.56587  | No change |
| NM_020560    | Mrps31        | -0.479323 | 1 | -0.879056 | 9.16535  | 4.72063  | No change |
| NM_010127    | Pou6f1        | -0.479003 | 1 | -0.660378 | 13.9234  | 8.37954  | No change |
| NM_144550    | Spice1        | -0.478857 | 1 | -0.886145 | 3.12992  | 1.60381  | No change |
| NM_026295    | Ctdp1         | -0.478556 | 1 | -0.72146  | 9.83455  | 5.66925  | No change |
| NM_029663    | Eef1d         | -0.477326 | 1 | -0.567178 | 88.3218  | 56.7368  | No change |
| NM_028162    | Tbc1d5        | -0.476589 | 1 | -0.667233 | 10.2931  | 6.16484  | No change |
| NM_144835    | Heat1         | -0.475588 | 1 | -0.737345 | 4.62837  | 2.63813  | No change |
| NM_001039223 | Gm14137       | -0.475529 | 1 | -1.08318  | 2.11328  | 0.936302 | No change |
| NM_029721    | Snx27         | -0.475426 | 1 | -0.650356 | 10.9219  | 6.61943  | No change |
| NM_009780    | C4b           | -0.473754 | 1 | -0.641287 | 13.7499  | 8.38648  | No change |
| NM_023168    | Grina         | -0.473074 | 1 | -0.602294 | 72.6568  | 45.5425  | No change |
| NM_133895    | Slc15a4       | -0.472713 | 1 | -0.817558 | 6.85082  | 3.68771  | No change |
| NM_001163505 | Ati3          | -0.47264  | 1 | -0.577234 | 28.749   | 18.3386  | No change |
| NM_178186    | Hist1h2ag     | -0.472264 | 1 | -0.99577  | 17.9758  | 8.49957  | No change |
| NM_145122    | Pex16         | -0.471936 | 1 | -1.04908  | 4.8623   | 2.20971  | No change |
| NM_007637    | Cct5          | -0.471605 | 1 | -0.555207 | 163.457  | 105.881  | No change |
| NM_178086    | Fa2h          | -0.469447 | 1 | -0.799268 | 8.08237  | 4.40771  | No change |
| NM_026622    | 3110057O12Rik | -0.468645 | 1 | -0.961809 | 3.80347  | 1.84375  | No change |
| NM_001109910 | Srrt          | -0.468416 | 1 | -0.60929  | 34.6717  | 21.6261  | No change |
| NM_001145351 | 6430550D23Rik | -0.468062 | 1 | -1.17791  | 2.60465  | 1.07322  | No change |
| NM_030715    | Polh          | -0.465789 | 1 | -0.770668 | 9.04928  | 5.0365   | No change |
| NM_010345    | Grb10         | -0.465624 | 1 | -0.741249 | 5.5601   | 3.15999  | No change |
| NM_025646    | Crls1         | -0.46507  | 1 | -0.757315 | 15.8711  | 8.91757  | No change |
| NM_008567    | Mcm6          | -0.464039 | 1 | -0.785345 | 7.2792   | 4.00901  | No change |
| NM_021454    | Cdc42ep5      | -0.462736 | 1 | -1.20807  | 5.16244  | 2.07729  | No change |
| NM_011862    | Pacsin2       | -0.462206 | 1 | -0.664032 | 13.7817  | 8.27174  | No change |
| NM_018878    | Paxip1        | -0.461267 | 1 | -0.718646 | 6.37082  | 3.67904  | No change |
| NM_028141    | Zfp661        | -0.460709 | 1 | -0.894509 | 4.01043  | 2.04156  | No change |
| NM_175094    | Pdhx          | -0.46042  | 1 | -0.680309 | 17.2507  | 10.2355  | No change |
| NM_001162387 | Pex11b        | -0.459267 | 1 | -0.736297 | 13.8419  | 7.89381  | No change |
| NM_010807    | Marcks1       | -0.458706 | 1 | -0.689702 | 24.7255  | 14.5734  | No change |
| NM_010145    | Ephx1         | -0.458117 | 1 | -0.640331 | 37.5881  | 22.9386  | No change |
| NM_027355    | Rnf168        | -0.458    | 1 | -0.676507 | 9.86471  | 5.86869  | No change |
| NM_019586    | Ube2j1        | -0.456952 | 1 | -0.589505 | 33.0062  | 20.8728  | No change |
| NM_001005866 | Kdm2b         | -0.45603  | 1 | -0.6935   | 7.49297  | 4.40444  | No change |
| NM_029078    | Pcf11         | -0.455792 | 1 | -0.551997 | 37.5362  | 24.3674  | No change |
| NM_013785    | Ip6k1         | -0.454797 | 1 | -0.573275 | 32.793   | 20.9743  | No change |
| NM_001042672 | Gpcpd1        | -0.454366 | 1 | -0.698449 | 10.4786  | 6.13779  | No change |
| NM_199143    | Znrf2         | -0.45436  | 1 | -0.681833 | 15.5941  | 9.24206  | No change |
| NM_001159367 | Per1          | -0.453645 | 1 | -0.760614 | 4.93627  | 2.76654  | No change |
| NM_026355    | Ergic2        | -0.453238 | 1 | -0.626519 | 47.1944  | 29.0805  | No change |
| NM_011630    | Nr2c2         | -0.453118 | 1 | -0.578803 | 16.9019  | 10.7686  | No change |
| NM_028451    | Larp1         | -0.452802 | 1 | -0.554727 | 29.3627  | 19.0249  | No change |
| NM_146202    | Zfp768        | -0.452743 | 1 | -0.769952 | 9.58394  | 5.3356   | No change |
| NM_001081324 | Neto2         | -0.452708 | 1 | -0.969286 | 1.53063  | 0.737491 | No change |
| NM_026879    | Chmp2b        | -0.452209 | 1 | -0.641033 | 31.6993  | 19.3343  | No change |
| NM_011234    | Rad51         | -0.451585 | 1 | -1.54326  | 1.30389  | 0.402943 | No change |
| NM_053173    | Kifc5b        | -0.451365 | 1 | -1.33093  | 1.27341  | 0.464578 | No change |
| NM_001163531 | Tmem175       | -0.450795 | 1 | -0.677088 | 13.8539  | 8.23791  | No change |
| NM_016859    | Bysl          | -0.450546 | 1 | -0.705033 | 8.49914  | 4.95496  | No change |
| NM_001033222 | Pdzd8         | -0.45007  | 1 | -0.543679 | 32.4137  | 21.1639  | No change |
| NR_003634    | Rps4y2        | -0.449667 | 1 | -0.6935   | 37.7719  | 22.201   | No change |
| NM_178111    | Trp53inp2     | -0.448746 | 1 | -0.682475 | 9.79669  | 5.80313  | No change |
| NM_028431    | Pmpcb         | -0.448548 | 1 | -0.728986 | 17.0302  | 9.76105  | No change |

|              |               |           |   |           |          |           |           |
|--------------|---------------|-----------|---|-----------|----------|-----------|-----------|
| NM_021536    | Rhot1         | -0.447671 | 1 | -0.681787 | 9.28228  | 5.50102   | No change |
| NM_001110214 | Dclre1c       | -0.447591 | 1 | -1.01543  | 1.95313  | 0.909236  | No change |
| NM_001136062 | Eno3          | -0.447376 | 1 | -0.833196 | 10.3087  | 5.48403   | No change |
| NM_001163553 | Ap4b1         | -0.447179 | 1 | -0.686048 | 13.0705  | 7.72274   | No change |
| NR_028277    | Gm6644        | -0.446729 | 1 | -0.652702 | 36.3414  | 21.9833   | No change |
| NM_025755    | Pacrgl        | -0.446682 | 1 | -0.915489 | 7.04546  | 3.5307    | No change |
| NM_023595    | Dut           | -0.446201 | 1 | -0.927368 | 4.16739  | 2.07031   | No change |
| NM_001163818 | Ppp1r10       | -0.44609  | 1 | -0.627939 | 14.7998  | 9.10984   | No change |
| NM_013846    | Ror2          | -0.445929 | 1 | -2.14918  | 0.403763 | 0.0723335 | No change |
| NM_027644    | Prss41        | -0.445929 | 1 | -2.14918  | 1.44149  | 0.258241  | No change |
| NR_027477    | Chpt1         | -0.445864 | 1 | -0.613127 | 47.3141  | 29.4278   | No change |
| NM_147220    | Abca9         | -0.444903 | 1 | -0.749824 | 3.69146  | 2.08455   | No change |
| NM_001081680 | Zfp72         | -0.443932 | 1 | -0.915893 | 6.24627  | 3.12901   | No change |
| NM_009658    | Akr1b3        | -0.443405 | 1 | -0.64923  | 35.0453  | 21.2505   | No change |
| NM_178795    | Ppip5k1       | -0.443282 | 1 | -0.647461 | 9.0219   | 5.47745   | No change |
| NM_139229    | Cog8          | -0.44314  | 1 | -0.664424 | 20.305   | 12.1813   | No change |
| NM_011830    | Impdh2        | -0.442839 | 1 | -0.69578  | 20.3289  | 11.9283   | No change |
| NM_013515    | Stom          | -0.442752 | 1 | -0.668652 | 14.5771  | 8.71893   | No change |
| NM_029888    | Zfp142        | -0.442065 | 1 | -0.687764 | 4.67293  | 2.7575    | No change |
| NM_008246    | Hiat1         | -0.441959 | 1 | -0.577326 | 39.8998  | 25.4459   | No change |
| NM_028307    | Tdrkh         | -0.441864 | 1 | -0.869843 | 4.60236  | 2.384     | No change |
| NM_001081395 | Amotl1        | -0.441127 | 1 | -0.59206  | 10.014   | 6.32081   | No change |
| NM_019423    | Elov12        | -0.441029 | 1 | -0.56134  | 36.3813  | 23.4626   | No change |
| NM_012017    | Zfp346        | -0.440898 | 1 | -0.691266 | 9.35827  | 5.50857   | No change |
| NM_009427    | Tob1          | -0.440722 | 1 | -0.752347 | 9.69906  | 5.4668    | No change |
| NR_027810    | 1110006O24Rik | -0.440465 | 1 | -1.378    | 3.99282  | 1.40217   | No change |
| NM_172121    | Zc3h3         | -0.440339 | 1 | -0.877634 | 3.50761  | 1.8066    | No change |
| NM_145546    | Gtf2b         | -0.440272 | 1 | -0.687683 | 27.4987  | 16.2275   | No change |
| NM_026904    | Anapc10       | -0.440169 | 1 | -0.855448 | 4.60143  | 2.40841   | No change |
| NM_175107    | 2310022A10Rik | -0.438168 | 1 | -1.18571  | 1.66439  | 0.680354  | No change |
| NM_001199227 | Osbp15        | -0.437853 | 1 | -0.976748 | 2.09409  | 1.00288   | No change |
| NM_145532    | Mall          | -0.437629 | 1 | -1.88615  | 1.24009  | 0.291982  | No change |
| NM_028070    | Alkbh4        | -0.437573 | 1 | -0.929214 | 5.49244  | 2.72412   | No change |
| NM_173745    | Dusp18        | -0.437009 | 1 | -0.717874 | 5.82279  | 3.36326   | No change |
| NM_009594    | Abl1          | -0.436314 | 1 | -0.617265 | 10.8534  | 6.7304    | No change |
| NM_001143776 | Fam13c        | -0.435739 | 1 | -1.19649  | 1.2977   | 0.525941  | No change |
| NM_001101598 | Isoc2a        | -0.435069 | 1 | -1.02663  | 6.15503  | 2.83994   | No change |
| NM_172747    | Kctd13        | -0.434577 | 1 | -0.929867 | 5.60409  | 2.77789   | No change |
| NM_197990    | 1700025G04Rik | -0.434318 | 1 | -0.783245 | 1.82914  | 1.00834   | No change |
| NM_010576    | Iitga4        | -0.434141 | 1 | -0.944093 | 0.893136 | 0.438106  | No change |
| NM_009180    | St6galnac2    | -0.433193 | 1 | -0.557323 | 64.3794  | 41.6338   | No change |
| NM_175246    | Snip1         | -0.431871 | 1 | -0.6977   | 12.8595  | 7.53419   | No change |
| NM_013664    | Sh3gl1        | -0.43159  | 1 | -0.650296 | 21.593   | 13.0821   | No change |
| NM_025352    | Uqcrcq        | -0.431175 | 1 | -0.616424 | 120.112  | 74.5245   | No change |
| NM_198303    | Eif5b         | -0.430095 | 1 | -0.611846 | 7.97308  | 4.96285   | No change |
| NM_001001650 | Prss48        | -0.428801 | 1 | -1.23407  | 4.03911  | 1.58863   | No change |
| NM_011508    | Eif1          | -0.428598 | 1 | -0.586894 | 67.1032  | 42.5055   | No change |
| NM_001017985 | C2cd3         | -0.428056 | 1 | -0.639012 | 5.96017  | 3.63964   | No change |
| NM_001038625 | Sertad2       | -0.428032 | 1 | -0.620699 | 10.0517  | 6.21781   | No change |
| NM_133835    | Ubac1         | -0.427689 | 1 | -0.658628 | 11.3327  | 6.82534   | No change |
| NM_008369    | Il3ra         | -0.426293 | 1 | -1.98568  | 1.44985  | 0.309     | No change |
| NM_019936    | Cript         | -0.425734 | 1 | -0.653431 | 34.2811  | 20.7219   | No change |
| NM_033322    | Lztlf1        | -0.425116 | 1 | -0.57966  | 24.854   | 15.823    | No change |
| NM_153514    | Rhobtb2       | -0.424413 | 1 | -0.853355 | 2.30489  | 1.20772   | No change |
| NM_023662    | Pcm1          | -0.423935 | 1 | -0.52951  | 21.3711  | 14.0909   | No change |
| NM_021512    | Nup160        | -0.423901 | 1 | -0.754679 | 3.45767  | 1.94508   | No change |
| NM_025825    | Appbp2        | -0.423502 | 1 | -0.609118 | 24.7475  | 15.4328   | No change |
| NM_008723    | Npm3          | -0.423371 | 1 | -0.827847 | 15.6404  | 8.34779   | No change |
| NM_001130457 | Tbrg4         | -0.423316 | 1 | -0.741755 | 8.99359  | 5.10609   | No change |
| NM_178694    | Zer1          | -0.423068 | 1 | -0.633149 | 11.4228  | 7.004     | No change |
| NR_027892    | 5430402O13Rik | -0.422957 | 1 | -1.13669  | 5.04162  | 2.13845   | No change |
| NM_194345    | Fam160b2      | -0.422674 | 1 | -0.690932 | 7.25608  | 4.27115   | No change |
| NM_013646    | Rora          | -0.422501 | 1 | -1.009    | 4.11205  | 1.92141   | No change |
| NM_178380    | Dhx38         | -0.422235 | 1 | -0.628649 | 11.56    | 7.11056   | No change |
| NM_026411    | 1700021F05Rik | -0.421445 | 1 | -0.802206 | 16.7636  | 9.11378   | No change |
| NM_172428    | Ccdc134       | -0.420907 | 1 | -0.768089 | 8.75848  | 4.87968   | No change |
| NM_025485    | Mrps22        | -0.420003 | 1 | -0.719035 | 19.5599  | 11.2857   | No change |
| NM_011676    | Unc119        | -0.419805 | 1 | -0.919568 | 7.07266  | 3.5307    | No change |
| NM_001039000 | Kif5a         | -0.419721 | 1 | -1.14488  | 0.728844 | 0.307139  | No change |
| NM_010358    | Gstm1         | -0.419486 | 1 | -0.512085 | 178.81   | 119.337   | No change |
| NM_177068    | Olfml2b       | -0.418924 | 1 | -1.01168  | 2.1392   | 0.997419  | No change |
| NR_024093    | U05342        | -0.418768 | 1 | -0.576321 | 24.3821  | 15.5583   | No change |
| NM_001163073 | Lcorl         | -0.418366 | 1 | -0.610511 | 11.1761  | 6.96242   | No change |
| NM_172615    | 1700021K19Rik | -0.418298 | 1 | -0.574403 | 15.6934  | 10.0274   | No change |
| NM_175439    | Mars2         | -0.418235 | 1 | -0.838839 | 4.3286   | 2.29173   | No change |
| NM_001161626 | Tmem116       | -0.418101 | 1 | -1.30118  | 2.60172  | 0.969378  | No change |

|              |               |           |   |           |          |           |           |
|--------------|---------------|-----------|---|-----------|----------|-----------|-----------|
| NM_007984    | Fscn1         | -0.418101 | 1 | -1.30118  | 1.22818  | 0.45761   | No change |
| NM_001190817 | Dnajc1        | -0.417923 | 1 | -0.596639 | 12.5581  | 7.89997   | No change |
| NM_001199210 | 4931408A02Rik | -0.417778 | 1 | -1.04369  | 2.79813  | 1.2736    | No change |
| NM_134010    | Nup107        | -0.416868 | 1 | -0.653026 | 12.0588  | 7.29055   | No change |
| NM_008155    | Gpi1          | -0.416847 | 1 | -0.530042 | 54.5391  | 35.9458   | No change |
| NM_133738    | Anxr2         | -0.416806 | 1 | -0.741052 | 5.42531  | 3.0814    | No change |
| NM_001081678 | Zfp800        | -0.416486 | 1 | -0.613061 | 13.6344  | 8.47852   | No change |
| NM_009104    | Rrm2          | -0.41646  | 1 | -1.15363  | 2.04603  | 0.856223  | No change |
| NM_175260    | Myh10         | -0.416225 | 1 | -0.588415 | 8.82019  | 5.58057   | No change |
| NM_172768    | Gramd1b       | -0.415935 | 1 | -0.531257 | 53.347   | 35.1301   | No change |
| NM_008233    | Hdgfrp2       | -0.415551 | 1 | -0.665906 | 14.7993  | 8.86623   | No change |
| NM_207267    | Tmsb15l       | -0.415499 | 1 | -0.820391 | 16.8104  | 9.01897   | No change |
| NM_022018    | Fam129a       | -0.414833 | 1 | -0.705573 | 6.35181  | 3.69981   | No change |
| NM_010771    | Matr3         | -0.414724 | 1 | -0.492995 | 71.9215  | 48.6419   | No change |
| NM_001111017 | Serac1        | -0.414657 | 1 | -0.684814 | 5.11247  | 3.02211   | No change |
| NM_172117    | Entpd6        | -0.413797 | 1 | -0.666832 | 13.0465  | 7.81086   | No change |
| NM_172571    | Fbf1          | -0.413558 | 1 | -0.579921 | 13.6454  | 8.68493   | No change |
| NM_023305    | Ubap1         | -0.412964 | 1 | -0.633379 | 15.763   | 9.66263   | No change |
| NM_027883    | Dhx34         | -0.412912 | 1 | -0.752562 | 4.89556  | 2.75756   | No change |
| NM_001081220 | Gpr179        | -0.412757 | 1 | -1.32224  | 0.338096 | 0.123831  | No change |
| NM_023040    | Gfer          | -0.412231 | 1 | -0.653365 | 20.1422  | 12.1741   | No change |
| NM_133810    | Stk17b        | -0.411996 | 1 | -0.627648 | 13.5219  | 8.32232   | No change |
| NM_011952    | Mapk3         | -0.411427 | 1 | -0.703667 | 13.9622  | 8.14333   | No change |
| NM_001015046 | Rap1gap2      | -0.411349 | 1 | -1.0956   | 0.793695 | 0.347195  | No change |
| NM_001195672 | Gm221         | -0.41049  | 1 | -1.50763  | 1.26361  | 0.400508  | No change |
| NM_026623    | Nudt21        | -0.410193 | 1 | -0.71573  | 20.45    | 11.8252   | No change |
| NM_027376    | Fuz           | -0.410056 | 1 | -0.819031 | 7.7163   | 4.14341   | No change |
| NM_026389    | Poldip2       | -0.409096 | 1 | -0.631999 | 21.2901  | 13.0629   | No change |
| NM_138747    | Nop2          | -0.408728 | 1 | -0.737183 | 7.54586  | 4.29706   | No change |
| NM_207209    | Sec24b        | -0.408216 | 1 | -0.614784 | 10.2272  | 6.35156   | No change |
| NM_153521    | Lrrc41        | -0.407863 | 1 | -0.564707 | 28.5914  | 18.3919   | No change |
| NM_177111    | Ccdc66        | -0.407241 | 1 | -0.63781  | 13.2184  | 8.07709   | No change |
| NM_023815    | Trp53rk       | -0.407162 | 1 | -0.858838 | 2.46365  | 1.28518   | No change |
| NM_030261    | Sesn3         | -0.406909 | 1 | -0.741505 | 8.84887  | 5.02337   | No change |
| NM_001039147 | Morf4l1       | -0.4069   | 1 | -0.520878 | 77.1789  | 51.1913   | No change |
| NM_027715    | Otud1         | -0.404356 | 1 | -0.867036 | 4.10607  | 2.12903   | No change |
| NM_001177503 | 3830431G21Rik | -0.403991 | 1 | -0.858489 | 3.04301  | 1.58767   | No change |
| NM_001164427 | Kcnk13        | -0.403957 | 1 | -1.81214  | 0.828611 | 0.207622  | No change |
| NM_008000    | Fert2         | -0.403808 | 1 | -0.742781 | 7.86143  | 4.4585    | No change |
| NM_028306    | Hspa12b       | -0.403804 | 1 | -1.34558  | 1.01828  | 0.365907  | No change |
| NM_001160215 | Fcrla         | -0.402572 | 1 | -2.20807  | 0.79721  | 0.129665  | No change |
| NM_008286    | Hrh2          | -0.402572 | 1 | -2.20807  | 0.83808  | 0.136312  | No change |
| NM_009311    | Tac1          | -0.402572 | 1 | -2.20807  | 1.28062  | 0.208291  | No change |
| NM_010164    | Eya1          | -0.402572 | 1 | -2.20807  | 0.305812 | 0.0497397 | No change |
| NM_011532    | Tbx1          | -0.402572 | 1 | -2.20807  | 0.745169 | 0.1212    | No change |
| NM_013496    | Crabp1        | -0.402572 | 1 | -2.20807  | 1.787    | 0.290652  | No change |
| NM_146010    | Tspan8        | -0.402572 | 1 | -2.20807  | 0.870017 | 0.141507  | No change |
| NR_015474    | Gm14047       | -0.402572 | 1 | -2.20807  | 0.948543 | 0.154279  | No change |
| NM_001001180 | Zfp941        | -0.402551 | 1 | -0.973608 | 1.80071  | 0.863181  | No change |
| NM_001163728 | 4930563E22Rik | -0.402427 | 1 | -1.06064  | 1.64082  | 0.736762  | No change |
| NM_026536    | Atp5s         | -0.402191 | 1 | -0.787065 | 9.85557  | 5.41454   | No change |
| NM_001039522 | Leo1          | -0.401597 | 1 | -0.741755 | 8.42547  | 4.7817    | No change |
| NM_133833    | Dst           | -0.401288 | 1 | -0.500448 | 11.6695  | 7.85109   | No change |
| NM_198300    | Cpeb3         | -0.400722 | 1 | -0.710668 | 3.80231  | 2.20628   | No change |
| NM_001114125 | Dab2ip        | -0.400599 | 1 | -0.744126 | 3.36306  | 1.90537   | No change |
| NM_025697    | 6330409N04Rik | -0.400269 | 1 | -0.72335  | 12.0416  | 6.92422   | No change |
| NM_001195730 | Dcdc2b        | -0.399873 | 1 | -1.11563  | 5.40443  | 2.32656   | No change |
| NM_027532    | 3200002M19Rik | -0.399699 | 1 | -0.8972   | 11.3393  | 5.75047   | No change |
| NM_022004    | Fxyd6         | -0.399219 | 1 | -0.735203 | 10.5395  | 6.00929   | No change |
| NM_001009951 | BC088983      | -0.399167 | 1 | -0.730026 | 13.8987  | 7.95397   | No change |
| NM_175935    | G6pc3         | -0.39825  | 1 | -0.63011  | 24.8259  | 15.2509   | No change |
| NM_001081091 | Cep152        | -0.398186 | 1 | -0.722292 | 3.50398  | 2.01632   | No change |
| NM_001204907 | Recql         | -0.397532 | 1 | -0.627411 | 18.0113  | 11.0856   | No change |
| NM_025407    | Uqcrc1        | -0.396944 | 1 | -0.668838 | 17.0445  | 10.1877   | No change |
| NM_009447    | Tuba4a        | -0.396368 | 1 | -0.544357 | 44.5383  | 29.0591   | No change |
| NM_011396    | Slc22a5       | -0.396285 | 1 | -0.602952 | 15.3975  | 9.64149   | No change |
| NM_145354    | Nsun2         | -0.394438 | 1 | -0.560375 | 17.0893  | 11.0254   | No change |
| NM_001001445 | Trpv1         | -0.394394 | 1 | -2.47111  | 0.304215 | 0.0284885 | No change |
| NM_001009546 | Naaladl1      | -0.394394 | 1 | -2.47111  | 0.342548 | 0.0320782 | No change |
| NM_001011829 | Olf761        | -0.394394 | 1 | -3.47111  | 0.788706 | 0         | No change |
| NM_001033292 | Espnl         | -0.394394 | 1 | -3.47111  | 0.140871 | 0         | No change |
| NM_001033477 | Gm1322        | -0.394394 | 1 | -3.47111  | 0.38994  | 0         | No change |
| NM_001033979 | Ldlrad2       | -0.394394 | 1 | -2.47111  | 0.419378 | 0.039273  | No change |
| NM_001104614 | Vmn2r3        | -0.394394 | 1 | -3.47111  | 0.287124 | 0         | No change |
| NM_001115075 | H2-M5         | -0.394394 | 1 | -2.47111  | 0.655233 | 0.0613598 | No change |
| NM_001145406 | Rhox3g-ps     | -0.394394 | 1 | -3.47111  | 1.06623  | 0         | No change |

|              |               |           |   |           |          |           |           |
|--------------|---------------|-----------|---|-----------|----------|-----------|-----------|
| NM_001164681 | Ces3a         | -0.394394 | 1 | -2.47111  | 0.401794 | 0.0376263 | No change |
| NM_001166729 | Vmn1r31       | -0.394394 | 1 | -3.47111  | 0.840595 | 0         | No change |
| NM_001167937 | D6Erd527e     | -0.394394 | 1 | -3.47111  | 0.34424  | 0         | No change |
| NM_007677    | Psg17         | -0.394394 | 1 | -2.47111  | 0.367861 | 0.0344486 | No change |
| NM_008022    | Foxd4         | -0.394394 | 1 | -3.47111  | 0.326918 | 0         | No change |
| NM_008657    | Myf6          | -0.394394 | 1 | -3.47111  | 0.614281 | 0         | No change |
| NM_008712    | Nos1          | -0.394394 | 1 | -3.47111  | 0.174788 | 0         | No change |
| NM_009019    | Rag1          | -0.394394 | 1 | -3.47111  | 0.114988 | 0         | No change |
| NM_009844    | Cd19          | -0.394394 | 1 | -3.47111  | 0.314705 | 0         | No change |
| NM_012035    | Trpc7         | -0.394394 | 1 | -2.47111  | 0.229596 | 0.0215007 | No change |
| NM_020017    | Magea3        | -0.394394 | 1 | -3.47111  | 0.692522 | 0         | No change |
| NM_021447    | Trim54        | -0.394394 | 1 | -3.47111  | 0.500406 | 0         | No change |
| NM_027426    | 2610109H07Rik | -0.394394 | 1 | -2.47111  | 0.147427 | 0.013806  | No change |
| NM_027510    | 3830403N18Rik | -0.394394 | 1 | -2.47111  | 0.751591 | 0.0703833 | No change |
| NM_029692    | Upp2          | -0.394394 | 1 | -3.47111  | 0.471188 | 0         | No change |
| NM_139226    | Onecut3       | -0.394394 | 1 | -3.47111  | 0.163494 | 0         | No change |
| NM_153384    | Clrn1         | -0.394394 | 1 | -2.47111  | 0.404337 | 0.0378644 | No change |
| NM_177335    | D930020B18Rik | -0.394394 | 1 | -3.47111  | 0.223701 | 0         | No change |
| NM_177713    | Gap1          | -0.394394 | 1 | -3.47111  | 0.373052 | 0         | No change |
| NM_178401    | Ramp1         | -0.394394 | 1 | -2.47111  | 0.899791 | 0.0842617 | No change |
| NM_198250    | Lrrc4b        | -0.394394 | 1 | -3.47111  | 0.28195  | 0         | No change |
| NM_207550    | Ofrr199       | -0.394394 | 1 | -3.47111  | 0.826993 | 0         | No change |
| NR_001583    | Speer9-ps1    | -0.394394 | 1 | -3.47111  | 0.98919  | 0         | No change |
| NR_003372    | Gm7904        | -0.394394 | 1 | -2.47111  | 0.616752 | 0.0577562 | No change |
| NR_033301    | Gm5627        | -0.394394 | 1 | -3.47111  | 0.82344  | 0         | No change |
| NR_033476    | Gm10789       | -0.394394 | 1 | -2.47111  | 0.166984 | 0.0156373 | No change |
| NR_037257    | Mir699p-1     | -0.394394 | 1 | -3.47111  | 8.81175  | 0         | No change |
| NR_037262    | Mir699p-2     | -0.394394 | 1 | -3.47111  | 8.81175  | 0         | No change |
| NM_025707    | Kih128        | -0.392938 | 1 | -0.642354 | 11.648   | 7.09357   | No change |
| NM_010058    | Dmwd          | -0.392634 | 1 | -0.68156  | 9.95613  | 5.89712   | No change |
| NM_027427    | Taf15         | -0.392577 | 1 | -0.814592 | 5.98631  | 3.22341   | No change |
| NM_181470    | Ltv1          | -0.391492 | 1 | -0.654696 | 16.9502  | 10.2326   | No change |
| NM_001013376 | Rpp38         | -0.391322 | 1 | -0.783297 | 13.7079  | 7.54959   | No change |
| NM_033595    | Pcdhga12      | -0.391213 | 1 | -0.613461 | 8.16446  | 5.07442   | No change |
| NM_139150    | Carf          | -0.390412 | 1 | -0.787581 | 5.27247  | 2.8948    | No change |
| NM_001013753 | Pcdh17        | -0.390204 | 1 | -1.00433  | 0.644966 | 0.301992  | No change |
| NM_001048167 | Mtap6         | -0.390096 | 1 | -1.8455   | 0.477541 | 0.115745  | No change |
| NM_019795    | Dnajc7        | -0.389805 | 1 | -0.512714 | 56.7009  | 37.8207   | No change |
| NM_001127363 | Inpp5a        | -0.388327 | 1 | -0.826203 | 4.04446  | 2.15932   | No change |
| NM_011813    | Fiz1          | -0.38828  | 1 | -0.687112 | 8.89641  | 5.24836   | No change |
| NM_021383    | Rqcd1         | -0.388199 | 1 | -0.632859 | 10.5414  | 6.46251   | No change |
| NM_001195338 | Bbip1         | -0.388052 | 1 | -0.570525 | 24.1951  | 15.4984   | No change |
| NM_008924    | Prkar2a       | -0.387996 | 1 | -0.569821 | 15.1116  | 9.68467   | No change |
| NM_001093750 | Ptchd1        | -0.387399 | 1 | -1.67464  | 0.397386 | 0.110635  | No change |
| NM_153126    | Nat10         | -0.385681 | 1 | -0.605757 | 10.9347  | 6.8328    | No change |
| NM_009778    | C3            | -0.385563 | 1 | -0.503145 | 27.8066  | 18.6715   | No change |
| NM_008449    | Kif5c         | -0.384425 | 1 | -0.763973 | 2.18045  | 1.21751   | No change |
| NM_153489    | Ubap2l        | -0.383884 | 1 | -0.524917 | 25.2452  | 16.6956   | No change |
| NM_015769    | Ercc4         | -0.383409 | 1 | -0.654163 | 4.22129  | 2.54905   | No change |
| NM_175659    | Hist1h2ah     | -0.383008 | 1 | -0.925674 | 19.8094  | 9.83184   | No change |
| NM_013676    | Supt5h        | -0.382869 | 1 | -0.485104 | 53.4359  | 36.3351   | No change |
| NR_027380    | Gm3219        | -0.382703 | 1 | -0.780277 | 22.6156  | 12.4802   | No change |
| NM_026047    | Rnf219        | -0.382366 | 1 | -0.818241 | 3.32735  | 1.78647   | No change |
| NM_007446    | Amy1          | -0.382073 | 1 | -0.771209 | 8.02334  | 4.45655   | No change |
| NM_021498    | Pole3         | -0.381959 | 1 | -0.620334 | 60.2687  | 37.2738   | No change |
| NM_001081030 | Sbf1          | -0.381723 | 1 | -0.5365   | 13.4545  | 8.826     | No change |
| NM_175660    | Hist1h2ab     | -0.380772 | 1 | -0.898118 | 16.528   | 8.37088   | No change |
| NM_001001981 | Utp14b        | -0.380611 | 1 | -0.619395 | 9.73249  | 6.02306   | No change |
| NM_008999    | Rab23         | -0.380537 | 1 | -0.789183 | 2.99997  | 1.64483   | No change |
| NM_001012309 | Ccdc55        | -0.380438 | 1 | -0.618494 | 11.6155  | 7.19293   | No change |
| NM_001163013 | Ythdc2        | -0.380222 | 1 | -0.675785 | 3.795    | 2.25665   | No change |
| NM_027860    | 0610010F05Rik | -0.380197 | 1 | -0.547703 | 17.2381  | 11.2195   | No change |
| NM_008228    | Hdac1         | -0.37838  | 1 | -0.650961 | 14.1437  | 8.55955   | No change |
| NM_198248    | Zbtb40        | -0.378252 | 1 | -0.725083 | 2.45166  | 1.40747   | No change |
| NM_007879    | Drg1          | -0.378219 | 1 | -0.529353 | 57.1628  | 37.6855   | No change |
| NM_019673    | Actl6a        | -0.378091 | 1 | -0.704975 | 10.0168  | 5.8337    | No change |
| NM_001033270 | Slc4a7        | -0.377764 | 1 | -0.609935 | 5.131    | 3.19654   | No change |
| NM_025400    | Nat9          | -0.377722 | 1 | -0.616602 | 31.7627  | 19.6949   | No change |
| NM_026250    | Gin1          | -0.377558 | 1 | -0.91168  | 3.85855  | 1.93459   | No change |
| NM_009178    | St3gal4       | -0.377468 | 1 | -0.804615 | 5.87358  | 3.18442   | No change |
| NM_001164573 | Myo1h         | -0.377341 | 1 | -0.757247 | 3.20548  | 1.79826   | No change |
| NM_001040683 | Med15         | -0.376981 | 1 | -0.612284 | 11.32    | 7.04049   | No change |
| NM_153583    | Atg4d         | -0.376785 | 1 | -0.687732 | 8.52991  | 5.02904   | No change |
| NM_138585    | Cherp         | -0.376781 | 1 | -0.64407  | 7.6112   | 4.62863   | No change |
| NR_029419    | Tmem161b      | -0.376614 | 1 | -0.6935   | 7.61394  | 4.4706    | No change |
| NM_145578    | Ube2m         | -0.376265 | 1 | -0.546565 | 58.6202  | 38.1828   | No change |

|              |               |           |   |           |          |           |           |
|--------------|---------------|-----------|---|-----------|----------|-----------|-----------|
| NM_010191    | Fdft1         | -0.376255 | 1 | -0.471576 | 75.0258  | 51.4979   | No change |
| NM_145599    | Tmem184c      | -0.376038 | 1 | -0.571871 | 19.6336  | 12.5634   | No change |
| NM_025372    | Tipin         | -0.375965 | 1 | -0.74573  | 12.8912  | 7.29173   | No change |
| NM_001008423 | Gm1568        | -0.375038 | 1 | -2.30118  | 0.237644 | 0.0326397 | No change |
| NM_001033323 | Igsf9b        | -0.375038 | 1 | -2.30118  | 0.365906 | 0.0502562 | No change |
| NM_008792    | Pcsk2         | -0.375038 | 1 | -2.30118  | 0.220408 | 0.0302724 | No change |
| NM_009644    | Ahrr          | -0.375038 | 1 | -2.30118  | 0.22092  | 0.0303428 | No change |
| NM_172655    | Hecw2         | -0.375038 | 1 | -2.30118  | 0.925128 | 0.127064  | No change |
| NM_198656    | Cdh26         | -0.375038 | 1 | -2.30118  | 0.361603 | 0.0496651 | No change |
| NR_037973    | LOC100502868  | -0.375038 | 1 | -2.30118  | 0.190557 | 0.0261724 | No change |
| NR_038024    | 4930486F22Rik | -0.375038 | 1 | -2.30118  | 1.85683  | 0.25503   | No change |
| NM_138302    | Tymp          | -0.374952 | 1 | -0.772935 | 6.67819  | 3.7042    | No change |
| NM_025878    | Mrps18b       | -0.374837 | 1 | -0.641682 | 27.533   | 16.7717   | No change |
| NM_001170567 | Depdc5        | -0.374374 | 1 | -0.672315 | 2.95651  | 1.76224   | No change |
| NM_011594    | Timp2         | -0.374108 | 1 | -0.529848 | 22.6473  | 14.9251   | No change |
| NM_010752    | Mad11l        | -0.373888 | 1 | -0.670416 | 8.97561  | 5.35713   | No change |
| NM_001113574 | Brd3          | -0.373592 | 1 | -0.55562  | 11.4098  | 7.38468   | No change |
| NM_053128    | Pcdhb3        | -0.372581 | 1 | -2.08778  | 0.404871 | 0.0758289 | No change |
| NM_178746    | Slc38a9       | -0.372109 | 1 | -0.649445 | 3.01823  | 1.8284    | No change |
| NM_177292    | Wscd2         | -0.370639 | 1 | -1.1816   | 0.858607 | 0.350444  | No change |
| NM_001034085 | Ppp2r1b       | -0.369758 | 1 | -0.591773 | 11.328   | 7.14751   | No change |
| NM_007761    | Crp           | -0.368528 | 1 | -0.647167 | 18.1107  | 10.9884   | No change |
| NM_010441    | Hmga2         | -0.368497 | 1 | -1.93677  | 0.46729  | 0.103148  | No change |
| NM_139146    | Satb2         | -0.368497 | 1 | -1.93677  | 0.369164 | 0.0814881 | No change |
| NM_177354    | Vash1         | -0.36822  | 1 | -1.47111  | 0.427909 | 0.139197  | No change |
| NM_028677    | Ppih          | -0.368134 | 1 | -1.05607  | 6.36834  | 2.86425   | No change |
| NM_001037755 | Baiap2        | -0.367663 | 1 | -0.595244 | 19.001   | 11.9594   | No change |
| NM_001146025 | Rnf44         | -0.367618 | 1 | -0.6072   | 8.86811  | 5.53478   | No change |
| NM_030221    | Nadsyn1       | -0.367584 | 1 | -0.821605 | 4.02635  | 2.15564   | No change |
| NM_023323    | Rpf2          | -0.367317 | 1 | -0.749263 | 9.88886  | 5.57835   | No change |
| NM_001163042 | Haus8         | -0.367128 | 1 | -0.946266 | 4.04803  | 1.97748   | No change |
| NR_033457    | Gm6225        | -0.367124 | 1 | -1.02     | 3.19768  | 1.47805   | No change |
| NM_026570    | Yeats4        | -0.36706  | 1 | -0.613229 | 23.9569  | 14.8885   | No change |
| NM_012039    | Zw10          | -0.366898 | 1 | -0.731635 | 5.51094  | 3.14829   | No change |
| NM_011785    | Akt3          | -0.366405 | 1 | -0.551254 | 12.3784  | 8.03574   | No change |
| NM_172893    | Parp12        | -0.366032 | 1 | -0.625303 | 9.45355  | 5.8251    | No change |
| NM_001159672 | Eftud1        | -0.365999 | 1 | -0.681606 | 5.81418  | 3.44231   | No change |
| NM_172582    | Coq6          | -0.364617 | 1 | -0.967675 | 3.91533  | 1.88216   | No change |
| NM_026422    | Mrrf          | -0.364599 | 1 | -0.707548 | 7.96048  | 4.62653   | No change |
| NM_027242    | 2010007H12Rik | -0.362804 | 1 | -0.99306  | 6.16029  | 2.90528   | No change |
| NM_011752    | Zfp259        | -0.362587 | 1 | -0.650078 | 8.38745  | 5.07807   | No change |
| NM_001081567 | Mapk10        | -0.362266 | 1 | -0.639398 | 3.72767  | 2.27401   | No change |
| NM_007804    | Cux2          | -0.361215 | 1 | -1.20807  | 0.667896 | 0.266777  | No change |
| NM_133867    | Eps8l3        | -0.361096 | 1 | -0.782767 | 5.3421   | 2.94122   | No change |
| NM_010703    | Lef1          | -0.36027  | 1 | -0.707942 | 7.09126  | 4.11987   | No change |
| NM_020295    | Lmbr1         | -0.359073 | 1 | -0.545476 | 11.6579  | 7.59831   | No change |
| NM_027260    | Vrk2          | -0.358883 | 1 | -0.738212 | 7.81327  | 4.44185   | No change |
| NM_024471    | Lias          | -0.358737 | 1 | -0.675519 | 12.4511  | 7.40291   | No change |
| NM_024499    | Sgta          | -0.358655 | 1 | -0.547177 | 28.8866  | 18.805    | No change |
| NM_133803    | Dpp3          | -0.358181 | 1 | -0.537298 | 23.1444  | 15.1716   | No change |
| NM_144917    | Elmod3        | -0.358142 | 1 | -0.644524 | 11.6531  | 7.08267   | No change |
| NM_001081420 | BC026590      | -0.357888 | 1 | -0.652946 | 5.5281   | 3.33989   | No change |
| NM_026481    | Tppp3         | -0.357724 | 1 | -0.99577  | 5.51282  | 2.59401   | No change |
| NM_175551    | Dido1         | -0.357619 | 1 | -0.476583 | 16.2779  | 11.1334   | No change |
| NM_001008498 | Wdr34         | -0.357193 | 1 | -0.593139 | 20.2497  | 12.7628   | No change |
| NM_134012    | Mbt1          | -0.356205 | 1 | -0.528593 | 12.7768  | 8.42662   | No change |
| NM_024428    | Dpy30         | -0.356127 | 1 | -0.531163 | 81.2067  | 53.4614   | No change |
| NM_019396    | Cyhr1         | -0.355891 | 1 | -0.510636 | 51.9513  | 34.6967   | No change |
| NM_010222    | Fkbp7         | -0.355863 | 1 | -0.765851 | 14.2025  | 7.91459   | No change |
| NR_015579    | 2810032G03Rik | -0.355781 | 1 | -1.22318  | 2.60379  | 1.02722   | No change |
| NM_177805    | Fam179b       | -0.355579 | 1 | -0.498508 | 14.959   | 10.0757   | No change |
| NM_001081355 | Prdm2         | -0.355481 | 1 | -0.497724 | 13.2939  | 8.95914   | No change |
| NM_178762    | Fam113a       | -0.355393 | 1 | -0.688206 | 5.38853  | 3.17478   | No change |
| NM_178185    | Hist1h2ap     | -0.354744 | 1 | -0.886145 | 20.0389  | 10.2298   | No change |
| NM_023624    | Lrat          | -0.354686 | 1 | -0.713506 | 3.06185  | 1.77162   | No change |
| NM_019680    | Elf4          | -0.354627 | 1 | -0.971537 | 1.02507  | 0.49113   | No change |
| NM_026454    | Ube2f         | -0.354374 | 1 | -0.653854 | 16.9247  | 10.2182   | No change |
| NM_028639    | Ttc7          | -0.354221 | 1 | -0.642041 | 5.3912   | 3.28232   | No change |
| NM_027801    | 2610015P09Rik | -0.353845 | 1 | -0.710196 | 4.55309  | 2.64068   | No change |
| NM_013918    | Usp25         | -0.353844 | 1 | -0.526425 | 15.0978  | 9.97232   | No change |
| NM_028982    | 8430419L09Rik | -0.353688 | 1 | -0.609254 | 7.41802  | 4.62232   | No change |
| NM_021392    | Ap4m1         | -0.353355 | 1 | -0.747317 | 8.00088  | 4.51831   | No change |
| NM_009569    | Zfpm1         | -0.352503 | 1 | -0.950276 | 1.87302  | 0.911699  | No change |
| NM_011279    | Rnf7          | -0.351785 | 1 | -0.538725 | 50.3612  | 32.9782   | No change |
| NM_011691    | Vav1          | -0.351598 | 1 | -1.13407  | 0.936373 | 0.396159  | No change |
| NM_175437    | Pion          | -0.351598 | 1 | -1.13407  | 1.04214  | 0.440906  | No change |

|              |               |           |   |           |          |          |           |
|--------------|---------------|-----------|---|-----------|----------|----------|-----------|
| NM_173038    | Tbcel         | -0.351222 | 1 | -0.553209 | 9.87796  | 6.40294  | No change |
| NM_175665    | Hist1h2bk     | -0.351111 | 1 | -0.560282 | 120.362  | 77.6322  | No change |
| NM_010299    | Gm2a          | -0.350869 | 1 | -0.479178 | 27.8706  | 19.0273  | No change |
| NM_175436    | Zfp526        | -0.350136 | 1 | -0.745968 | 4.05433  | 2.29166  | No change |
| NM_026943    | Snrpd2        | -0.349848 | 1 | -0.544208 | 108.253  | 70.6141  | No change |
| NM_033580    | Pcdhgb8       | -0.349244 | 1 | -0.574906 | 8.57388  | 5.47334  | No change |
| NM_001081390 | Palld         | -0.349212 | 1 | -1.23978  | 0.879961 | 0.342437 | No change |
| NM_010791    | Meox1         | -0.349212 | 1 | -1.23978  | 1.42037  | 0.552738 | No change |
| NM_133757    | Pgs1          | -0.348616 | 1 | -0.665836 | 8.97698  | 5.37339  | No change |
| NM_153173    | Hist1h4h      | -0.347766 | 1 | -0.556793 | 95.9371  | 62.0286  | No change |
| NM_194348    | Atg2a         | -0.34729  | 1 | -0.681483 | 2.94601  | 1.74382  | No change |
| NM_010336    | Lpar1         | -0.347107 | 1 | -0.60565  | 9.05884  | 5.65872  | No change |
| NM_009242    | Sparc         | -0.347093 | 1 | -0.453121 | 74.8767  | 52.0555  | No change |
| NM_153387    | Tubgcp4       | -0.346977 | 1 | -0.712694 | 6.14538  | 3.55734  | No change |
| NM_021555    | Fam203a       | -0.346555 | 1 | -0.862298 | 4.2163   | 2.18986  | No change |
| NM_001161818 | Zfp639        | -0.34632  | 1 | -0.620653 | 14.1564  | 8.74952  | No change |
| NM_029344    | Acyp2         | -0.346226 | 1 | -1.14394  | 5.60867  | 2.3538   | No change |
| NM_198702    | Lphn3         | -0.346083 | 1 | -0.697941 | 2.91387  | 1.7046   | No change |
| NM_033588    | Pcdhga5       | -0.346019 | 1 | -0.566155 | 9.13377  | 5.86662  | No change |
| NM_020027    | Prrc2a        | -0.345666 | 1 | -0.464216 | 20.1518  | 13.9018  | No change |
| NM_020002    | Rec8          | -0.345643 | 1 | -0.740013 | 6.64711  | 3.77296  | No change |
| NM_030153    | Naa35         | -0.345427 | 1 | -0.694961 | 6.55871  | 3.84496  | No change |
| NM_009680    | Ap3b1         | -0.345253 | 1 | -0.525778 | 15.1348  | 10.0007  | No change |
| NM_025682    | Pspc1         | -0.345224 | 1 | -0.523755 | 26.1752  | 17.3205  | No change |
| NM_030238    | Dync1h1       | -0.344495 | 1 | -0.405532 | 35.4903  | 25.5043  | No change |
| NM_027995    | Paqr7         | -0.34423  | 1 | -0.665175 | 9.7442   | 5.83497  | No change |
| NM_026388    | Tprgl         | -0.343834 | 1 | -0.48079  | 59.8054  | 40.7819  | No change |
| NM_022880    | Slc29a1       | -0.343435 | 1 | -0.522313 | 30.4264  | 20.1537  | No change |
| NM_001081028 | Sipa1l3       | -0.343108 | 1 | -0.643784 | 2.9547   | 1.7964   | No change |
| NM_053204    | Erc1          | -0.342777 | 1 | -0.535026 | 6.14189  | 4.0321   | No change |
| NM_027656    | Zbtb46        | -0.342562 | 1 | -0.823861 | 4.67157  | 2.49522  | No change |
| NM_001039143 | Nlrp5         | -0.342437 | 1 | -1.63617  | 0.724501 | 0.207309 | No change |
| NM_033371    | Ppp1r16a      | -0.342235 | 1 | -0.57158  | 14.5869  | 9.3331   | No change |
| NM_001001884 | Nckap5l       | -0.342009 | 1 | -0.953259 | 1.24913  | 0.606393 | No change |
| NM_009840    | Cct8          | -0.341609 | 1 | -0.443853 | 77.1548  | 53.9859  | No change |
| NM_010267    | Gdap1         | -0.340987 | 1 | -1.80368  | 0.584167 | 0.14588  | No change |
| NR_028426    | Gm5129        | -0.340987 | 1 | -1.80368  | 3.81404  | 0.952451 | No change |
| NM_146073    | Zdhhc14       | -0.340675 | 1 | -1.15463  | 1.16341  | 0.483984 | No change |
| NM_175445    | Rassf2        | -0.340536 | 1 | -0.655532 | 4.3549   | 2.62558  | No change |
| NM_013415    | Atp1b2        | -0.340443 | 1 | -1.25811  | 1.01277  | 0.38819  | No change |
| NM_027201    | Zfp511        | -0.340174 | 1 | -0.90022  | 6.46244  | 3.26323  | No change |
| NM_007619    | Cbl           | -0.339149 | 1 | -0.515035 | 12.5593  | 8.36125  | No change |
| NM_172626    | Rbm27         | -0.338524 | 1 | -0.53765  | 8.01068  | 5.24908  | No change |
| NM_008379    | Kpnb1         | -0.338264 | 1 | -0.420803 | 47.5195  | 33.7876  | No change |
| NM_026305    | Tceb2         | -0.337212 | 1 | -0.477736 | 194.399  | 132.842  | No change |
| NM_016699    | Exosc10       | -0.336823 | 1 | -0.675646 | 6.49236  | 3.85835  | No change |
| NM_007856    | Dhcr7         | -0.336513 | 1 | -0.954858 | 2.10366  | 1.01976  | No change |
| NM_001008233 | Plekhn1       | -0.336203 | 1 | -0.873206 | 3.46888  | 1.78665  | No change |
| NM_007460    | Ap3d1         | -0.33584  | 1 | -0.44036  | 37.2629  | 26.1362  | No change |
| NM_001163701 | Rpap1         | -0.335637 | 1 | -0.66834  | 3.95098  | 2.36025  | No change |
| NR_033782    | 4921531C22Rik | -0.335611 | 1 | -0.748642 | 6.54858  | 3.69318  | No change |
| NM_145614    | Dlat          | -0.335136 | 1 | -0.503201 | 17.2548  | 11.5826  | No change |
| NM_145436    | Cdc27         | -0.334471 | 1 | -0.434601 | 33.1699  | 23.3588  | No change |
| NM_001039209 | Gm13152       | -0.33332  | 1 | -0.77923  | 8.69759  | 4.79763  | No change |
| NM_019825    | Ncoa6         | -0.330229 | 1 | -0.493959 | 10.6525  | 7.19688  | No change |
| NM_172280    | 2210018M11Rik | -0.329557 | 1 | -0.555531 | 9.75771  | 6.31346  | No change |
| NM_177343    | Camk1d        | -0.329527 | 1 | -0.917172 | 0.911467 | 0.454309 | No change |
| NM_026260    | Tctn3         | -0.329281 | 1 | -0.630528 | 8.28643  | 5.08465  | No change |
| NM_001164663 | 9830001H06Rik | -0.329183 | 1 | -0.721086 | 1.0376   | 0.596811 | No change |
| NM_001164643 | Trappc9       | -0.329063 | 1 | -0.625993 | 8.19193  | 5.04285  | No change |
| NM_001166666 | Rtel1         | -0.329007 | 1 | -0.624538 | 5.41805  | 3.33873  | No change |
| NM_010091    | Dvl1          | -0.328945 | 1 | -0.508647 | 18.2143  | 12.1796  | No change |
| NM_153580    | Ino80e        | -0.328254 | 1 | -0.685847 | 14.9479  | 8.81759  | No change |
| NM_197982    | Ddx39         | -0.327351 | 1 | -0.661439 | 11.1744  | 6.70741  | No change |
| NM_001035231 | Zfp748        | -0.327127 | 1 | -0.540521 | 9.49532  | 6.20878  | No change |
| NM_008889    | Ppp1r14b      | -0.326833 | 1 | -0.656974 | 20.6273  | 12.4209  | No change |
| NM_026114    | Eif2s1        | -0.326514 | 1 | -0.498676 | 21.0052  | 14.1441  | No change |
| NM_027619    | Ttc14         | -0.325158 | 1 | -0.432793 | 17.5674  | 12.3864  | No change |
| NM_011678    | Usp4          | -0.324273 | 1 | -0.494251 | 18.4872  | 12.4871  | No change |
| NM_001159538 | Fgd2          | -0.324104 | 1 | -0.936771 | 2.28327  | 1.12131  | No change |
| NM_001024717 | Gal3st3       | -0.32369  | 1 | -1.84034  | 0.863249 | 0.207488 | No change |
| NM_007891    | E2f1          | -0.32369  | 1 | -1.84034  | 0.849914 | 0.204283 | No change |
| NM_008297    | Hsf2          | -0.323628 | 1 | -0.673036 | 6.48306  | 3.85914  | No change |
| NM_030113    | Arhgap10      | -0.323628 | 1 | -0.673036 | 5.59746  | 3.33197  | No change |
| NM_009706    | Arhgap5       | -0.323584 | 1 | -0.415474 | 43.4843  | 31.032   | No change |
| NM_175360    | Obfc1         | -0.323368 | 1 | -0.739041 | 6.53139  | 3.70805  | No change |

|              |               |           |   |           |          |           |           |
|--------------|---------------|-----------|---|-----------|----------|-----------|-----------|
| NM_178719    | Smcr7l        | -0.323354 | 1 | -0.529064 | 9.20835  | 6.06963   | No change |
| NM_011413    | C4a           | -0.323138 | 1 | -0.75339  | 2.145    | 1.20522   | No change |
| NM_026042    | Med29         | -0.322892 | 1 | -0.639505 | 9.47721  | 5.77781   | No change |
| NM_177041    | Flad1         | -0.322868 | 1 | -0.583218 | 13.601   | 8.62935   | No change |
| NM_029157    | Sf3a3         | -0.322636 | 1 | -0.782037 | 5.99597  | 3.29976   | No change |
| NM_021449    | Crbn          | -0.322506 | 1 | -0.459473 | 25.5673  | 17.6943   | No change |
| NM_026021    | Zmynd19       | -0.3223   | 1 | -0.734142 | 10.1341  | 5.7736    | No change |
| NM_178182    | Hist1h2ai     | -0.322153 | 1 | -0.86015  | 19.3296  | 10.0471   | No change |
| NM_146122    | Dennd1a       | -0.320815 | 1 | -0.645532 | 4.48392  | 2.72185   | No change |
| NM_024274    | Fars2         | -0.320625 | 1 | -0.584424 | 13.637   | 8.64463   | No change |
| NM_018783    | Tfip11        | -0.320265 | 1 | -0.609436 | 6.85343  | 4.26822   | No change |
| NM_011869    | Med24         | -0.320199 | 1 | -0.466153 | 26.7122  | 18.4004   | No change |
| NM_027425    | Rufy2         | -0.319788 | 1 | -0.486125 | 7.90051  | 5.36665   | No change |
| NM_001033207 | Nlrc5         | -0.319724 | 1 | -0.802487 | 1.33465  | 0.723595  | No change |
| NM_001083928 | Tle3          | -0.318588 | 1 | -0.600945 | 4.94132  | 3.09588   | No change |
| NM_018817    | Smarcal1      | -0.318433 | 1 | -0.647985 | 2.82301  | 1.71058   | No change |
| NM_001127356 | Eif2b4        | -0.318243 | 1 | -0.513471 | 24.6131  | 16.4016   | No change |
| NM_025369    | Mrps36        | -0.318243 | 1 | -0.695202 | 20.538   | 12.032    | No change |
| NM_021537    | Stk25         | -0.31784  | 1 | -0.43008  | 46.7547  | 33.0274   | No change |
| NM_178751    | Orai2         | -0.317586 | 1 | -0.794353 | 2.46316  | 1.34328   | No change |
| NM_001031814 | Smg1          | -0.316819 | 1 | -0.38101  | 29.4088  | 21.4962   | No change |
| NM_001105667 | Dtymk         | -0.315875 | 1 | -0.606528 | 23.9721  | 14.9594   | No change |
| NM_172691    | B230312A22Rik | -0.315715 | 1 | -0.556659 | 11.6273  | 7.51611   | No change |
| NM_033579    | Pcdhgb7       | -0.315503 | 1 | -0.537158 | 8.92119  | 5.84658   | No change |
| NM_001004436 | Wapal         | -0.315197 | 1 | -0.43135  | 30.9932  | 21.8739   | No change |
| NM_177331    | Gen1          | -0.314915 | 1 | -0.817974 | 2.6111   | 1.39952   | No change |
| NM_172717    | Chfr          | -0.313805 | 1 | -0.575916 | 9.24543  | 5.89566   | No change |
| NM_025523    | Ndufc1        | -0.313453 | 1 | -0.653365 | 43.0952  | 26.0112   | No change |
| NM_001038698 | Elavl4        | -0.313022 | 1 | -2.13407  | 0.312992 | 0.0537358 | No change |
| NM_001080934 | Slc16a5       | -0.313022 | 1 | -2.13407  | 0.415388 | 0.0713155 | No change |
| NM_001081401 | Adamts3       | -0.313022 | 1 | -2.13407  | 0.16552  | 0.0284171 | No change |
| NM_001160402 | Tm4sf19       | -0.313022 | 1 | -2.13407  | 0.99799  | 0.171339  | No change |
| NM_008340    | Igfals        | -0.313022 | 1 | -2.13407  | 0.594255 | 0.102024  | No change |
| NM_001163775 | Taok2         | -0.31287  | 1 | -0.487704 | 12.1754  | 8.26095   | No change |
| NM_025317    | Mrpl54        | -0.312365 | 1 | -0.542029 | 64.2315  | 41.9494   | No change |
| NM_144831    | Dhx8          | -0.312365 | 1 | -0.542029 | 8.73179  | 5.70271   | No change |
| NM_008854    | Prkaca        | -0.31192  | 1 | -0.546569 | 15.7744  | 10.2693   | No change |
| NM_001171739 | Bag1          | -0.311548 | 1 | -0.406915 | 154.936  | 111.225   | No change |
| NM_026071    | Slc25a19      | -0.311205 | 1 | -0.661211 | 11.2739  | 6.7664    | No change |
| NM_001038593 | Glrx2         | -0.311109 | 1 | -0.57775  | 8.07055  | 5.13963   | No change |
| NM_008916    | Inpp5k        | -0.310862 | 1 | -0.540896 | 14.2236  | 9.29667   | No change |
| NM_177722    | 6030422M02Rik | -0.31059  | 1 | -1.02365  | 1.7744   | 0.815487  | No change |
| NM_024436    | Rab22a        | -0.310356 | 1 | -0.545401 | 18.8744  | 12.2974   | No change |
| NM_033575    | Pcdhgb2       | -0.310276 | 1 | -0.529545 | 8.89793  | 5.86239   | No change |
| NM_024221    | Pdhh          | -0.310234 | 1 | -0.490417 | 40.5486  | 27.4594   | No change |
| NM_178188    | Hist1h2ad     | -0.310216 | 1 | -0.836392 | 20.0389  | 10.5951   | No change |
| NM_033594    | Pcdhga11      | -0.309967 | 1 | -0.535648 | 8.26615  | 5.42279   | No change |
| NM_181730    | Polr1d        | -0.309559 | 1 | -0.507634 | 54.8841  | 36.7211   | No change |
| NM_177231    | Arrb1         | -0.309328 | 1 | -0.585636 | 3.71395  | 2.35198   | No change |
| NM_024222    | Stt3b         | -0.308544 | 1 | -0.373905 | 104.242  | 76.5714   | No change |
| NM_001001447 | Zscan22       | -0.308505 | 1 | -0.6935   | 5.37327  | 3.15113   | No change |
| NM_010572    | Irs4          | -0.308352 | 1 | -1.88615  | 0.30117  | 0.0689414 | No change |
| NM_010959    | Oit3          | -0.308352 | 1 | -1.88615  | 0.692824 | 0.158596  | No change |
| NM_181402    | Parp11        | -0.307527 | 1 | -0.623111 | 5.50207  | 3.39291   | No change |
| NM_001122604 | Dazap1        | -0.307497 | 1 | -0.595889 | 11.6824  | 7.34461   | No change |
| NM_001122685 | Rhbdd1        | -0.307278 | 1 | -0.539389 | 9.99934  | 6.54238   | No change |
| NM_010249    | Gabpb1        | -0.306688 | 1 | -0.746982 | 8.17772  | 4.61437   | No change |
| NM_024179    | 0610009O20Rik | -0.306674 | 1 | -0.569046 | 12.118   | 7.76441   | No change |
| NM_033582    | Pcdhgc4       | -0.304752 | 1 | -0.536286 | 7.3675   | 4.83085   | No change |
| NM_001081176 | Polr3g        | -0.304564 | 1 | -0.631881 | 6.24048  | 3.82416   | No change |
| NM_177604    | AA986860      | -0.303722 | 1 | -1.02816  | 1.50933  | 0.69101   | No change |
| NM_029437    | Ckap5         | -0.303138 | 1 | -0.463159 | 11.6084  | 8.01229   | No change |
| NM_001161536 | Islr2         | -0.30298  | 1 | -1.13768  | 0.793437 | 0.333601  | No change |
| NM_024124    | Hdac9         | -0.30298  | 1 | -1.13768  | 0.771218 | 0.324259  | No change |
| NM_009613    | Adam11        | -0.302902 | 1 | -1.22495  | 0.633572 | 0.248627  | No change |
| NM_011941    | Mapkbp1       | -0.302045 | 1 | -0.45193  | 12.3774  | 8.61036   | No change |
| NM_134091    | Sgsm3         | -0.300334 | 1 | -0.679694 | 4.81363  | 2.85056   | No change |
| NM_009986    | Cux1          | -0.300286 | 1 | -0.453006 | 16.4858  | 11.4597   | No change |
| NM_144911    | Rpap2         | -0.299628 | 1 | -0.618127 | 8.78021  | 5.433     | No change |
| NM_011836    | Lamc3         | -0.299447 | 1 | -0.703281 | 2.16248  | 1.25907   | No change |
| NM_001013414 | Neurl4        | -0.299397 | 1 | -0.556906 | 5.78654  | 3.73926   | No change |
| NM_028221    | Fam192a       | -0.299397 | 1 | -0.556906 | 16.7356  | 10.8145   | No change |
| NM_008664    | Myom2         | -0.299121 | 1 | -0.941998 | 1.09753  | 0.536294  | No change |
| NM_025666    | Ubr7          | -0.298776 | 1 | -0.478641 | 18.5233  | 12.6469   | No change |
| NM_178919    | Lmf2          | -0.298742 | 1 | -0.578323 | 8.84952  | 5.6326    | No change |
| NM_172490    | Sepsecs       | -0.298677 | 1 | -0.649287 | 8.68899  | 5.25846   | No change |

|              |               |           |   |           |          |           |           |
|--------------|---------------|-----------|---|-----------|----------|-----------|-----------|
| NM_146164    | Lrch4         | -0.298012 | 1 | -0.565653 | 9.07071  | 5.8253    | No change |
| NM_172310    | Tarsl2        | -0.297882 | 1 | -0.871348 | 2.09472  | 1.07889   | No change |
| NM_016698    | Rnf10         | -0.297567 | 1 | -0.428516 | 35.8542  | 25.3529   | No change |
| NM_009561    | Zfp61         | -0.297364 | 1 | -0.684511 | 5.9092   | 3.48708   | No change |
| NM_001163733 | Ush1c         | -0.297343 | 1 | -1.94504  | 0.544299 | 0.116809  | No change |
| NM_013669    | Snap91        | -0.297343 | 1 | -1.94504  | 0.402075 | 0.0862872 | No change |
| NR_015388    | Dlx6os1       | -0.297343 | 1 | -1.94504  | 0.393838 | 0.0845196 | No change |
| NM_011840    | Map2k5        | -0.297186 | 1 | -0.595436 | 10.062   | 6.32702   | No change |
| NM_025336    | Chchd3        | -0.29703  | 1 | -0.448537 | 58.5966  | 40.8587   | No change |
| NM_001104530 | Med7          | -0.296249 | 1 | -0.544454 | 13.4899  | 8.79379   | No change |
| NM_007943    | Eps15         | -0.295823 | 1 | -0.474409 | 11.7545  | 8.04912   | No change |
| NM_023290    | Mkxn2         | -0.295638 | 1 | -0.528795 | 16.2409  | 10.7045   | No change |
| NM_175681    | Glp2r         | -0.295429 | 1 | -2.02365  | 0.300339 | 0.0589296 | No change |
| NM_001033238 | Cblb          | -0.295393 | 1 | -0.605757 | 3.32921  | 2.0781    | No change |
| NM_001199433 | Dnm1          | -0.295063 | 1 | -0.481955 | 9.48849  | 6.46314   | No change |
| NM_001037736 | Arhgef10      | -0.295042 | 1 | -0.566433 | 5.07378  | 3.25653   | No change |
| NM_178622    | Suds3         | -0.294692 | 1 | -0.442337 | 36.4304  | 25.5125   | No change |
| NM_024177    | Mrpl38        | -0.294461 | 1 | -0.543137 | 22.77    | 14.8568   | No change |
| NM_027389    | Gon4l         | -0.294016 | 1 | -0.421726 | 15.5274  | 11.0316   | No change |
| NM_172870    | Bnc2          | -0.293977 | 1 | -0.686121 | 2.09522  | 1.2349    | No change |
| NM_001002927 | Penk          | -0.293276 | 1 | -0.448624 | 56.5145  | 39.4037   | No change |
| NM_033578    | Pcdhgb6       | -0.292916 | 1 | -0.51217  | 8.7358   | 5.82545   | No change |
| NM_001164365 | Nt5c2         | -0.292858 | 1 | -0.456545 | 18.7761  | 13.0189   | No change |
| NM_145494    | Me2           | -0.29256  | 1 | -0.636694 | 7.04026  | 4.29869   | No change |
| NM_130903    | Cd209c        | -0.292452 | 1 | -0.968607 | 3.19239  | 1.52845   | No change |
| NM_001142539 | Gm9992        | -0.291464 | 1 | -0.77923  | 5.64368  | 3.10959   | No change |
| NM_026274    | Rspry1        | -0.290485 | 1 | -0.518018 | 9.88629  | 6.56545   | No change |
| NM_199322    | Dot1l         | -0.289673 | 1 | -0.526102 | 6.20554  | 4.09766   | No change |
| NM_001159662 | Ppp1r16b      | -0.289524 | 1 | -0.886145 | 0.97038  | 0.494181  | No change |
| NM_001081084 | Cubn          | -0.289173 | 1 | -1.03815  | 0.36308  | 0.164818  | No change |
| NM_030176    | Spata2L       | -0.289101 | 1 | -0.643721 | 6.85216  | 4.16267   | No change |
| NM_028948    | Ccdc11        | -0.289063 | 1 | -0.55113  | 15.4543  | 10.0262   | No change |
| NM_001206335 | Itfg3         | -0.288546 | 1 | -0.500067 | 15.2872  | 10.2809   | No change |
| NM_178189    | Hist1h2ac     | -0.288511 | 1 | -0.764155 | 3.77399  | 2.10218   | No change |
| NM_008300    | Hspa4         | -0.288296 | 1 | -0.363658 | 70.9847  | 52.5126   | No change |
| NM_001145960 | Slc37a2       | -0.287928 | 1 | -0.78584  | 1.94813  | 1.06813   | No change |
| NM_175347    | Srl           | -0.287538 | 1 | -0.697536 | 2.49203  | 1.45659   | No change |
| NM_025547    | Mterfd1       | -0.287135 | 1 | -0.531325 | 22.3694  | 14.7164   | No change |
| NM_008923    | Prkar1b       | -0.286883 | 1 | -1.16178  | 1.19156  | 0.490972  | No change |
| NM_021793    | Tmem8         | -0.286696 | 1 | -0.507826 | 11.592   | 7.75334   | No change |
| NM_011499    | Strap         | -0.286417 | 1 | -0.443603 | 29.4165  | 20.5815   | No change |
| NM_001104617 | Rdx           | -0.285766 | 1 | -0.568219 | 13.6727  | 8.76358   | No change |
| NM_011760    | Zfp54         | -0.285652 | 1 | -0.646604 | 6.21081  | 3.76506   | No change |
| NM_027706    | Nbas          | -0.285506 | 1 | -0.473864 | 7.55649  | 5.17609   | No change |
| NM_001080390 | Mark2         | -0.285212 | 1 | -0.482155 | 11.48    | 7.81801   | No change |
| NM_175158    | Utp20         | -0.284893 | 1 | -0.455316 | 7.52093  | 5.21909   | No change |
| NM_028207    | Dusp3         | -0.28449  | 1 | -0.499963 | 10.0319  | 6.74695   | No change |
| NM_021422    | Dnaja4        | -0.283315 | 1 | -0.448499 | 23.4706  | 16.365    | No change |
| NM_080553    | Itpr3         | -0.283307 | 1 | -0.628987 | 1.89931  | 1.1659    | No change |
| NM_033589    | Pcdhga6       | -0.282898 | 1 | -0.505873 | 8.68859  | 5.81918   | No change |
| NM_133907    | Ube3c         | -0.282879 | 1 | -0.446233 | 14.318   | 9.9991    | No change |
| NM_001033988 | Ncoa4         | -0.282761 | 1 | -0.390288 | 46.0296  | 33.4255   | No change |
| NM_177464    | D19Ert386e    | -0.282569 | 1 | -0.523904 | 8.51238  | 5.62925   | No change |
| NM_019663    | Pias1         | -0.282329 | 1 | -0.399572 | 35.7233  | 25.774    | No change |
| NM_001038015 | Gnpda2        | -0.282145 | 1 | -0.524238 | 18.3143  | 12.1084   | No change |
| NM_008495    | Lgals1        | -0.282065 | 1 | -0.649705 | 18.9913  | 11.4866   | No change |
| NM_025820    | Crnk1l        | -0.282025 | 1 | -0.480268 | 15.9055  | 10.846    | No change |
| NM_172836    | 9930021J03Rik | -0.281389 | 1 | -0.442779 | 9.18703  | 6.43131   | No change |
| NM_019869    | Rbm14         | -0.281147 | 1 | -0.541155 | 10.4453  | 6.82385   | No change |
| NM_033134    | Inpp5e        | -0.280858 | 1 | -0.459533 | 14.6296  | 10.1219   | No change |
| NM_001109995 | Eftud2        | -0.28047  | 1 | -0.436892 | 23.5028  | 16.5208   | No change |
| NM_008775    | Pafah1b2      | -0.280213 | 1 | -0.38531  | 40.2119  | 29.3021   | No change |
| NR_033612    | Gm13238       | -0.279868 | 1 | -1.39516  | 3.24153  | 1.11304   | No change |
| NM_033574    | Pcdhgb1       | -0.279167 | 1 | -0.501969 | 8.76972  | 5.88948   | No change |
| NR_033619    | Gm6623        | -0.278973 | 1 | -0.689453 | 4.76648  | 2.80173   | No change |
| NM_025819    | 1200016B10Rik | -0.278763 | 1 | -0.470159 | 14.4212  | 9.90355   | No change |
| NM_177117    | Dlec1         | -0.278203 | 1 | -0.667965 | 2.5822   | 1.5414    | No change |
| NM_133879    | Zbtb48        | -0.277787 | 1 | -0.724682 | 4.7276   | 2.70909   | No change |
| NM_001122829 | Upf1          | -0.277044 | 1 | -0.476247 | 10.5989  | 7.24753   | No change |
| NM_009014    | Rad5111       | -0.276939 | 1 | -1.17565  | 1.61292  | 0.65686   | No change |
| NM_172724    | Baat1         | -0.276898 | 1 | -0.592154 | 5.2595   | 3.314     | No change |
| NM_133227    | Nup155        | -0.275857 | 1 | -0.523575 | 5.01693  | 3.31826   | No change |
| NM_010774    | Mbd4          | -0.275686 | 1 | -0.635878 | 4.3947   | 2.68415   | No change |
| NM_178184    | Hist1h2an     | -0.275181 | 1 | -0.855772 | 16.4922  | 8.58569   | No change |
| NM_023423    | Akirin1       | -0.275006 | 1 | -0.454429 | 25.26    | 17.5388   | No change |
| NM_212433    | Fbxo3         | -0.275006 | 1 | -0.454429 | 12.8496  | 8.92187   | No change |



|              |               |           |   |           |          |           |           |
|--------------|---------------|-----------|---|-----------|----------|-----------|-----------|
| NM_178616    | Psmid11       | -0.274661 | 1 | -0.65099  | 8.31677  | 5.02496   | No change |
| NM_033593    | Pcdhga10      | -0.273844 | 1 | -0.486313 | 9.51476  | 6.46024   | No change |
| NM_009525    | Wnt5b         | -0.273406 | 1 | -1.04964  | 1.61666  | 0.726691  | No change |
| NM_134117    | Pkdcc         | -0.273047 | 1 | -0.819031 | 2.95357  | 1.57975   | No change |
| NM_001081288 | Taf2          | -0.272147 | 1 | -0.415337 | 18.4306  | 13.1515   | No change |
| NM_001177544 | Hist1h2ao     | -0.271886 | 1 | -0.751603 | 17.8978  | 10.0563   | No change |
| NM_001005916 | Zbtb9         | -0.271569 | 1 | -0.548787 | 9.28739  | 6.03415   | No change |
| NM_028142    | Nsun4         | -0.271067 | 1 | -0.549436 | 7.30476  | 4.74381   | No change |
| NM_011708    | Vwf           | -0.270948 | 1 | -0.744789 | 1.06709  | 0.602533  | No change |
| NM_019766    | Ptges3        | -0.27016  | 1 | -0.382379 | 76.434   | 55.8088   | No change |
| NM_007916    | Ddx19a        | -0.270154 | 1 | -0.439792 | 25.8743  | 18.1499   | No change |
| NM_013823    | Kl            | -0.270125 | 1 | -1.47111  | 0.476603 | 0.154299  | No change |
| NM_026343    | Stx17         | -0.270058 | 1 | -0.463362 | 8.95294  | 6.1773    | No change |
| NM_028287    | Zufsp         | -0.269629 | 1 | -0.542533 | 11.2617  | 7.34916   | No change |
| NM_029148    | Tmx4          | -0.269224 | 1 | -0.422446 | 15.7869  | 11.2091   | No change |
| NM_033577    | Pcdhgb5       | -0.268895 | 1 | -0.488625 | 8.92353  | 6.04873   | No change |
| NM_023140    | Glrx3         | -0.268781 | 1 | -0.430466 | 44.281   | 31.2645   | No change |
| NM_018888    | Uqcc          | -0.268241 | 1 | -0.493455 | 14.4192  | 9.74075   | No change |
| NM_007569    | Btg1          | -0.267138 | 1 | -0.422008 | 15.8646  | 11.2675   | No change |
| NM_172464    | Daam1         | -0.266983 | 1 | -0.524324 | 5.07052  | 3.35163   | No change |
| NM_001014981 | Wdr7          | -0.266894 | 1 | -0.443596 | 8.64789  | 6.04991   | No change |
| NM_020559    | Alas1         | -0.266773 | 1 | -0.435121 | 24.9935  | 17.5891   | No change |
| NM_001103181 | Tulp4         | -0.266125 | 1 | -0.411454 | 10.154   | 7.26505   | No change |
| NM_001114312 | 4930506M07Rik | -0.265739 | 1 | -0.575805 | 5.10615  | 3.25443   | No change |
| NR_030673    | D930016D06Rik | -0.265704 | 1 | -0.538762 | 6.97112  | 4.56115   | No change |
| NM_025578    | Mrps25        | -0.264448 | 1 | -0.409498 | 14.8694  | 10.6532   | No change |
| NM_001014390 | Dyrk2         | -0.263644 | 1 | -0.559812 | 10.6317  | 6.85323   | No change |
| NM_020493    | Srf           | -0.263007 | 1 | -0.530456 | 6.74283  | 4.4376    | No change |
| NM_173413    | Rab8b         | -0.262595 | 1 | -0.502423 | 7.15853  | 4.80521   | No change |
| NM_008795    | Cdk18         | -0.26247  | 1 | -0.707808 | 3.4549   | 2.00336   | No change |
| NM_175684    | Fchs1         | -0.26247  | 1 | -0.707808 | 2.48962  | 1.44362   | No change |
| NM_026987    | Dhx16         | -0.26201  | 1 | -0.519088 | 8.77843  | 5.82375   | No change |
| NM_011721    | Wrn           | -0.26175  | 1 | -0.44366  | 9.08421  | 6.35468   | No change |
| NM_001033249 | Zfp583        | -0.261687 | 1 | -0.979255 | 1.58794  | 0.752961  | No change |
| NM_020557    | Cmpk2         | -0.261687 | 1 | -0.979255 | 1.37681  | 0.65285   | No change |
| NM_175089    | Nek1          | -0.261385 | 1 | -0.563301 | 5.13217  | 3.29996   | No change |
| NM_007467    | Aplp1         | -0.261289 | 1 | -1.11881  | 1.34025  | 0.570246  | No change |
| NM_001076554 | Spna2         | -0.260826 | 1 | -0.358313 | 24.462   | 18.1626   | No change |
| NM_001045533 | March4        | -0.260647 | 1 | -2.20807  | 0.233031 | 0.0342923 | No change |
| NM_008174    | Grm8          | -0.260647 | 1 | -2.20807  | 0.26528  | 0.039038  | No change |
| NM_023852    | Rab3c         | -0.260647 | 1 | -2.20807  | 0.114802 | 0.016894  | No change |
| NM_172830    | Slc4a9        | -0.260647 | 1 | -2.20807  | 0.331308 | 0.0487545 | No change |
| NM_033591    | Pcdhga8       | -0.260278 | 1 | -0.474683 | 8.9161   | 6.10276   | No change |
| NM_001004185 | Whamm         | -0.259633 | 1 | -0.5808   | 6.33572  | 4.02348   | No change |
| NM_007465    | Birc2         | -0.258992 | 1 | -0.377951 | 42.2375  | 30.9341   | No change |
| NM_001085507 | Zbtb34        | -0.258765 | 1 | -0.647985 | 2.04793  | 1.23965   | No change |
| NM_025931    | Ift27         | -0.258205 | 1 | -0.623111 | 15.052   | 9.27477   | No change |
| NM_011162    | Mapk8ip1      | -0.256942 | 1 | -0.629964 | 4.98825  | 3.05858   | No change |
| NM_172714    | Lin54         | -0.256831 | 1 | -0.511465 | 6.78482  | 4.52518   | No change |
| NM_001128609 | Dedd          | -0.256473 | 1 | -0.441069 | 20.5789  | 14.4212   | No change |
| NM_001164289 | Gm6907        | -0.256197 | 1 | -1.06302  | 2.23543  | 0.993334  | No change |
| NM_028412    | Ciz1          | -0.256055 | 1 | -0.52277  | 10.1163  | 6.69349   | No change |
| NM_025991    | Kbtbd4        | -0.255658 | 1 | -0.544886 | 9.90205  | 6.45009   | No change |
| NM_177214    | Snmp200       | -0.25564  | 1 | -0.392475 | 14.9416  | 10.8326   | No change |
| NM_023158    | Cxcl16        | -0.255587 | 1 | -0.601504 | 6.88958  | 4.31098   | No change |
| NM_198703    | Wnk1          | -0.255241 | 1 | -0.337743 | 25.7569  | 19.3995   | No change |
| NM_177721    | Ranbp6        | -0.255161 | 1 | -0.451181 | 10.2814  | 7.15402   | No change |
| NM_178363    | Ylpm1         | -0.254765 | 1 | -0.422794 | 9.59095  | 6.80759   | No change |
| NM_001170454 | Tada2b        | -0.254423 | 1 | -0.474889 | 10.5155  | 7.19614   | No change |
| NM_027541    | Prpf3         | -0.254077 | 1 | -0.562308 | 7.67847  | 4.94023   | No change |
| NM_008029    | Flt4          | -0.25363  | 1 | -1.0186   | 0.668403 | 0.307377  | No change |
| NM_028197    | 2510003E04Rik | -0.253261 | 1 | -0.438927 | 22.4698  | 15.7696   | No change |
| NM_145975    | Ddx46         | -0.252595 | 1 | -0.411892 | 13.1818  | 9.42786   | No change |
| NM_026658    | Mto1          | -0.252451 | 1 | -0.676222 | 4.86435  | 2.885     | No change |
| NM_181403    | Vps37c        | -0.251908 | 1 | -0.559464 | 8.71522  | 5.61842   | No change |
| NM_023403    | Mesdc2        | -0.251369 | 1 | -0.402451 | 18.4472  | 13.281    | No change |
| NM_173738    | Zfp940        | -0.251186 | 1 | -1.13007  | 1.10944  | 0.467524  | No change |
| NM_178930    | Gbf1          | -0.251135 | 1 | -0.396545 | 13.9473  | 10.0828   | No change |
| NM_025551    | Ndufa12       | -0.251085 | 1 | -0.448803 | 87.582   | 61.0415   | No change |
| NM_009828    | Ccna2         | -0.250919 | 1 | -0.640568 | 4.78504  | 2.91148   | No change |
| NM_001112731 | C030039L03Rik | -0.250331 | 1 | -0.750793 | 1.82925  | 1.02781   | No change |
| NM_030132    | Utp23         | -0.250331 | 1 | -0.750793 | 2.89093  | 1.62434   | No change |
| NM_001205341 | Ppfia2        | -0.250214 | 1 | -0.868867 | 0.887808 | 0.457267  | No change |
| NM_001162919 | Pgbd1         | -0.249602 | 1 | -0.743405 | 2.62992  | 1.48563   | No change |
| NM_001164156 | Mcrs1         | -0.249537 | 1 | -0.527064 | 14.2413  | 9.39358   | No change |
| NM_033581    | Pcdhgc3       | -0.249457 | 1 | -0.460691 | 9.221    | 6.37325   | No change |

|              |               |           |   |           |          |           |           |
|--------------|---------------|-----------|---|-----------|----------|-----------|-----------|
| NM_145552    | Gnl2          | -0.249419 | 1 | -0.480832 | 15.4214  | 10.509    | No change |
| NM_008146    | Golga3        | -0.248728 | 1 | -0.39934  | 17.2894  | 12.4744   | No change |
| NM_146251    | Pnpla7        | -0.248707 | 1 | -0.597187 | 3.6145   | 2.2684    | No change |
| NM_001039878 | Strn4         | -0.248434 | 1 | -0.433082 | 15.9457  | 11.2365   | No change |
| NR_004446    | H2-K2         | -0.248021 | 1 | -0.5186   | 20.2657  | 13.4473   | No change |
| NM_145970    | Cc2d1a        | -0.24781  | 1 | -0.501061 | 9.26272  | 6.22276   | No change |
| NM_020608    | Cramp11       | -0.247185 | 1 | -0.427335 | 7.81369  | 5.52826   | No change |
| NM_021328    | Bin3          | -0.246918 | 1 | -0.554694 | 12.1468  | 7.85668   | No change |
| NM_026184    | Ero1lb        | -0.246771 | 1 | -0.386984 | 22.5733  | 16.4278   | No change |
| NM_023434    | Tox4          | -0.246075 | 1 | -0.402199 | 17.3998  | 12.5288   | No change |
| NM_144912    | Rad9b         | -0.246037 | 1 | -0.575105 | 11.5936  | 7.39091   | No change |
| NM_010947    | Ntn3          | -0.245684 | 1 | -1.83368  | 0.370101 | 0.0879791 | No change |
| NM_028189    | B3gnt3        | -0.245684 | 1 | -1.83368  | 0.861634 | 0.204824  | No change |
| NM_175418    | Mybpc1        | -0.245684 | 1 | -1.83368  | 0.462485 | 0.10994   | No change |
| NM_181595    | Ppp1r9a       | -0.245536 | 1 | -0.429135 | 5.92759  | 4.1885    | No change |
| NR_033744    | Cbwd1         | -0.245155 | 1 | -0.491594 | 15.9417  | 10.7811   | No change |
| NM_025341    | Abhd6         | -0.244704 | 1 | -0.802081 | 3.41903  | 1.84992   | No change |
| NM_146235    | Ercc6l        | -0.244521 | 1 | -1.02365  | 0.896479 | 0.41043   | No change |
| NM_030265    | Kcnip4        | -0.242107 | 1 | -0.688699 | 4.746    | 2.78895   | No change |
| NM_139140    | Spats2        | -0.241009 | 1 | -0.584378 | 8.26291  | 5.23258   | No change |
| NM_017472    | Snx3          | -0.240877 | 1 | -0.427046 | 39.933   | 28.2576   | No change |
| NM_020035    | Pigo          | -0.240407 | 1 | -0.490604 | 7.33783  | 4.96571   | No change |
| NM_175656    | Hist1h4i      | -0.240017 | 1 | -0.523121 | 45.6833  | 30.2137   | No change |
| NM_172735    | Zc3hc1        | -0.23983  | 1 | -0.578023 | 9.47099  | 6.02469   | No change |
| NM_146258    | Stard13       | -0.239808 | 1 | -0.609628 | 2.64736  | 1.64652   | No change |
| NM_011211    | Ptpd          | -0.239652 | 1 | -0.538222 | 2.651    | 1.73466   | No change |
| NM_001146346 | Emp3          | -0.239582 | 1 | -0.762763 | 9.82963  | 5.47326   | No change |
| NM_001033348 | Ralgapa2      | -0.239498 | 1 | -0.389446 | 8.7098   | 6.32747   | No change |
| NM_001029993 | Zc3h18        | -0.239245 | 1 | -0.523575 | 6.39402  | 4.22744   | No change |
| NM_001172104 | Zbtb25        | -0.239132 | 1 | -0.611706 | 8.66498  | 5.38112   | No change |
| NM_008708    | Nmt2          | -0.238799 | 1 | -0.553276 | 10.6934  | 6.92284   | No change |
| NM_178879    | B3gnt9-ps     | -0.238773 | 1 | -0.754355 | 3.41573  | 1.9136    | No change |
| NM_001136065 | Hipk2         | -0.238214 | 1 | -0.548704 | 5.21283  | 3.38568   | No change |
| NM_177259    | Dab1          | -0.237611 | 1 | -1.71622  | 0.408023 | 0.108466  | No change |
| NM_011492    | Stk11         | -0.237408 | 1 | -0.549521 | 12.5542  | 8.14901   | No change |
| NM_026558    | Fam92a        | -0.23738  | 1 | -0.483708 | 24.1245  | 16.4047   | No change |
| NM_001164320 | Chadl         | -0.23706  | 1 | -1.07879  | 1.28655  | 0.563951  | No change |
| NM_018814    | Pcnx          | -0.236928 | 1 | -0.38304  | 7.24545  | 5.28718   | No change |
| NM_019811    | Acss2         | -0.236885 | 1 | -0.536273 | 7.77373  | 5.09354   | No change |
| NM_001033879 | Tubal3        | -0.236724 | 1 | -3.34558  | 0.225106 | 0         | No change |
| NM_001080963 | Ppapdc1a      | -0.236724 | 1 | -3.34558  | 0.64056  | 0         | No change |
| NM_001081299 | Cdh18         | -0.236724 | 1 | -3.34558  | 0.253983 | 0         | No change |
| NM_001085506 | Magea10       | -0.236724 | 1 | -3.34558  | 0.382718 | 0         | No change |
| NM_001099326 | Gm14458       | -0.236724 | 1 | -3.34558  | 0.81417  | 0         | No change |
| NM_001113471 | Plin1         | -0.236724 | 1 | -3.34558  | 0.374693 | 0         | No change |
| NM_001114157 | Rhox3h        | -0.236724 | 1 | -2.34558  | 0.661851 | 0.0681776 | No change |
| NM_001164594 | Pdzrn4        | -0.236724 | 1 | -2.34558  | 0.205402 | 0.0211586 | No change |
| NM_009314    | Tacr2         | -0.236724 | 1 | -3.34558  | 0.308649 | 0         | No change |
| NM_009527    | Wnt7a         | -0.236724 | 1 | -3.34558  | 0.219436 | 0         | No change |
| NM_016879    | Krt85         | -0.236724 | 1 | -2.34558  | 0.483307 | 0.0497857 | No change |
| NM_021344    | Tesc          | -0.236724 | 1 | -2.34558  | 0.73984  | 0.0762112 | No change |
| NM_023865    | 9530002B09Rik | -0.236724 | 1 | -3.34558  | 0.844763 | 0         | No change |
| NM_027150    | 2310046A06Rik | -0.236724 | 1 | -2.34558  | 0.569387 | 0.0586528 | No change |
| NM_031261    | Fthl17        | -0.236724 | 1 | -3.34558  | 0.821851 | 0         | No change |
| NM_053220    | Vmn1r43       | -0.236724 | 1 | -3.34558  | 0.73984  | 0         | No change |
| NM_130878    | Cdhr1         | -0.236724 | 1 | -3.34558  | 0.161926 | 0         | No change |
| NM_138649    | Syt17         | -0.236724 | 1 | -2.34558  | 0.431001 | 0.0443976 | No change |
| NM_144845    | Ugt3a2        | -0.236724 | 1 | -3.34558  | 0.317363 | 0         | No change |
| NM_146699    | Olfrr1445     | -0.236724 | 1 | -3.34558  | 0.737491 | 0         | No change |
| NM_172786    | Ii20ra        | -0.236724 | 1 | -2.34558  | 0.333778 | 0.0343826 | No change |
| NM_172802    | Fscn2         | -0.236724 | 1 | -3.34558  | 0.405663 | 0         | No change |
| NM_172890    | Slc6a11       | -0.236724 | 1 | -3.34558  | 0.171404 | 0         | No change |
| NM_174853    | Disc1         | -0.236724 | 1 | -2.34558  | 0.289423 | 0.0298135 | No change |
| NM_174995    | Mgst2         | -0.236724 | 1 | -3.34558  | 1.18324  | 0         | No change |
| NM_175631    | Cbln4         | -0.236724 | 1 | -3.34558  | 0.248992 | 0         | No change |
| NM_177024    | Tmprss11bnl   | -0.236724 | 1 | -3.34558  | 0.314499 | 0         | No change |
| NM_177448    | Mogat2        | -0.236724 | 1 | -3.34558  | 0.393301 | 0         | No change |
| NM_177585    | lqcj          | -0.236724 | 1 | -3.34558  | 0.441374 | 0         | No change |
| NM_212485    | Krt73         | -0.236724 | 1 | -3.34558  | 0.323551 | 0         | No change |
| NM_026937    | Ascc1         | -0.236463 | 1 | -0.642041 | 8.33692  | 5.0659    | No change |
| NM_148926    | Zfand3        | -0.236275 | 1 | -0.428125 | 19.7867  | 13.9906   | No change |
| NM_028355    | Tmem48        | -0.236161 | 1 | -0.789469 | 2.70547  | 1.47707   | No change |
| NM_025706    | Tbc1d15       | -0.236122 | 1 | -0.435893 | 12.6698  | 8.90976   | No change |
| NM_001159910 | Ccdc85c       | -0.234998 | 1 | -0.989239 | 2.56787  | 1.20657   | No change |
| NM_001113517 | Arhgef7       | -0.234348 | 1 | -0.65514  | 2.34713  | 1.41281   | No change |
| NM_199469    | Nploc4        | -0.234187 | 1 | -0.349448 | 30.4498  | 22.7466   | No change |

|              |               |           |   |           |          |           |           |
|--------------|---------------|-----------|---|-----------|----------|-----------|-----------|
| NM_001204229 | Clec16a       | -0.233953 | 1 | -0.543071 | 3.31818  | 2.16363   | No change |
| NM_021889    | Syt9          | -0.233629 | 1 | -1.35563  | 0.639217 | 0.225758  | No change |
| NM_009343    | Phf1          | -0.2336   | 1 | -0.52699  | 9.41099  | 6.20671   | No change |
| NM_030197    | 2700078E11Rik | -0.233591 | 1 | -0.376393 | 15.8645  | 11.6304   | No change |
| NM_001081322 | Myo5c         | -0.233097 | 1 | -1.28824  | 0.37269  | 0.138634  | No change |
| NM_008895    | Pomc          | -0.233097 | 1 | -1.28824  | 2.49151  | 0.926795  | No change |
| NM_011089    | Pira2         | -0.233097 | 1 | -1.28824  | 0.724292 | 0.269423  | No change |
| NM_173441    | lws1          | -0.232677 | 1 | -0.384442 | 8.47353  | 6.17717   | No change |
| NM_177694    | Ano5          | -0.232299 | 1 | -0.752128 | 1.00265  | 0.562524  | No change |
| NM_021441    | Taf1c         | -0.231863 | 1 | -0.60482  | 4.4535   | 2.77901   | No change |
| NM_027643    | Naa40         | -0.231328 | 1 | -0.397771 | 20.7908  | 15.0158   | No change |
| NM_001024922 | Ddx49         | -0.231198 | 1 | -0.40296  | 30.499   | 21.9475   | No change |
| NM_021324    | Ttyh1         | -0.23097  | 1 | -0.550835 | 4.98319  | 3.23133   | No change |
| NM_172823    | Lmln          | -0.230718 | 1 | -0.71622  | 2.153    | 1.23988   | No change |
| NM_173753    | Fnip1         | -0.230155 | 1 | -0.352817 | 19.6618  | 14.6531   | No change |
| NM_172719    | Gcn111        | -0.229107 | 1 | -0.373591 | 10.4874  | 7.70329   | No change |
| NM_007578    | Cacna1a       | -0.229015 | 1 | -0.787581 | 0.861383 | 0.47082   | No change |
| NM_053009    | Zfp91         | -0.228784 | 1 | -0.317973 | 41.1523  | 31.4221   | No change |
| NM_001162917 | Dennd4a       | -0.228768 | 1 | -0.495046 | 3.17262  | 2.14004   | No change |
| NM_001145800 | Igsf9         | -0.227751 | 1 | -0.566527 | 4.19675  | 2.69108   | No change |
| NM_009032    | Rbm4          | -0.227676 | 1 | -0.38091  | 30.8848  | 22.57     | No change |
| NM_001109750 | Dgcr2         | -0.2274   | 1 | -0.366966 | 23.5565  | 17.383    | No change |
| NM_010937    | Nras          | -0.227359 | 1 | -0.389702 | 15.9655  | 11.5958   | No change |
| NM_001122998 | Tiam2         | -0.226953 | 1 | -0.767501 | 1.17989  | 0.654451  | No change |
| NM_152817    | Ttc27         | -0.226868 | 1 | -0.67202  | 3.68236  | 2.18937   | No change |
| NR_033199    | 1700001G17Rik | -0.226486 | 1 | -1.88615  | 1.80308  | 0.403774  | No change |
| NM_009690    | Cd5i          | -0.226413 | 1 | -1.08778  | 1.53961  | 0.669626  | No change |
| NM_028835    | Atg7          | -0.225859 | 1 | -0.576601 | 5.30842  | 3.3795    | No change |
| NM_008866    | Lypla1        | -0.224989 | 1 | -0.432933 | 18.1322  | 12.7766   | No change |
| NM_027186    | Rpain         | -0.22491  | 1 | -0.734142 | 7.54844  | 4.29003   | No change |
| NM_001013389 | Mrs2          | -0.224775 | 1 | -0.443722 | 19.6236  | 13.7232   | No change |
| NM_176917    | Mettl4        | -0.223938 | 1 | -0.503621 | 11.6047  | 7.78014   | No change |
| NM_025595    | Mrpl51        | -0.223697 | 1 | -0.405228 | 37.8596  | 27.2      | No change |
| NM_173443    | Vcpip1        | -0.223375 | 1 | -0.381213 | 14.5474  | 10.6285   | No change |
| NM_011131    | Pold1         | -0.22321  | 1 | -0.657204 | 3.17526  | 1.908     | No change |
| NM_026173    | Poc5          | -0.222831 | 1 | -0.534008 | 6.70964  | 4.40261   | No change |
| NM_145130    | Lpcat3        | -0.222734 | 1 | -0.424565 | 18.6628  | 13.2277   | No change |
| NM_053126    | Pcdhb1        | -0.222686 | 1 | -1.22718  | 1.04951  | 0.409065  | No change |
| NM_032543    | Rnf123        | -0.222015 | 1 | -0.404517 | 13.1502  | 9.45231   | No change |
| NM_027871    | Arhgef3       | -0.221592 | 1 | -0.52306  | 6.02645  | 3.98505   | No change |
| NM_033592    | Pcdhga9       | -0.221455 | 1 | -0.44105  | 8.40689  | 5.88999   | No change |
| NM_010898    | Nf2           | -0.220726 | 1 | -0.355706 | 21.6717  | 16.1179   | No change |
| NM_019990    | Stard10       | -0.220678 | 1 | -0.348805 | 94.3007  | 70.4726   | No change |
| NM_025346    | Rmnd5b        | -0.220246 | 1 | -0.424513 | 23.422   | 16.6012   | No change |
| NM_001038653 | Slc16a3       | -0.219169 | 1 | -0.6935   | 3.70797  | 2.17022   | No change |
| NM_010952    | Oaz2-ps       | -0.218688 | 1 | -0.386758 | 36.0559  | 26.2403   | No change |
| NM_007422    | Adss          | -0.21797  | 1 | -0.354851 | 38.8457  | 28.9076   | No change |
| NM_001081385 | Pcdh11x       | -0.217755 | 1 | -2.05607  | 0.26446  | 0.0480743 | No change |
| NM_026180    | Abcg8         | -0.217755 | 1 | -2.05607  | 0.323976 | 0.0588933 | No change |
| NM_027222    | 2010001M09Rik | -0.217755 | 1 | -2.05607  | 1.3077   | 0.237718  | No change |
| NM_028877    | Paln3         | -0.217755 | 1 | -2.05607  | 0.483781 | 0.0879432 | No change |
| NM_176971    | Rab9b         | -0.217755 | 1 | -2.05607  | 0.315017 | 0.0572648 | No change |
| NM_178625    | Tmem209       | -0.216969 | 1 | -0.404461 | 15.79    | 11.3499   | No change |
| NM_001113562 | Cutc          | -0.21592  | 1 | -0.666579 | 7.7259   | 4.61043   | No change |
| NM_001024539 | Shc2          | -0.215718 | 1 | -0.90784  | 1.16243  | 0.580569  | No change |
| NM_033584    | Pcdhga1       | -0.215691 | 1 | -0.433059 | 8.89403  | 6.26608   | No change |
| NM_020009    | Mtor          | -0.215292 | 1 | -0.356375 | 10.8654  | 8.07701   | No change |
| NM_020494    | Ddx24         | -0.215117 | 1 | -0.333744 | 45.142   | 34.0908   | No change |
| NM_016805    | Hnrnpu        | -0.215103 | 1 | -0.281866 | 110.806  | 86.7556   | No change |
| NM_054095    | Necab2        | -0.215055 | 1 | -0.997177 | 1.87404  | 0.874167  | No change |
| NM_026993    | Ddah1         | -0.214211 | 1 | -0.644439 | 2.93875  | 1.78184   | No change |
| NM_207229_2  | Plac9         | -0.214126 | 1 | -0.680397 | 21.0161  | 12.4162   | No change |
| NM_001013751 | Gm52          | -0.214065 | 1 | -1.95653  | 0.751812 | 0.154889  | No change |
| NM_027363    | 2010110P09Rik | -0.214065 | 1 | -1.95653  | 1.19031  | 0.24523   | No change |
| NM_178609    | E2f7          | -0.214065 | 1 | -1.95653  | 0.25454  | 0.0524404 | No change |
| NM_025294    | Gm16515       | -0.213159 | 1 | -0.455809 | 7.84234  | 5.4374    | No change |
| NM_009728    | Atp10a        | -0.212983 | 1 | -0.434228 | 7.12349  | 5.01447   | No change |
| NM_033586    | Pcdhga3       | -0.212357 | 1 | -0.430361 | 8.54262  | 6.02977   | No change |
| NM_001110212 | Gigyf2        | -0.212341 | 1 | -0.383553 | 11.2361  | 8.19532   | No change |
| NM_001002791 | Defb22        | -0.212334 | 1 | -0.50729  | 35.9058  | 24.0069   | No change |
| NM_019637    | Styx          | -0.212054 | 1 | -0.403506 | 12.0956  | 8.69989   | No change |
| NM_198605    | F630043A04Rik | -0.211489 | 1 | -0.886145 | 2.12779  | 1.08004   | No change |
| NM_033587    | Pcdhga4       | -0.21145  | 1 | -0.429216 | 8.8538   | 6.2544    | No change |
| NM_177652    | Ryr3          | -0.211335 | 1 | -0.532966 | 1.23482  | 0.810724  | No change |
| NM_009884    | Cebpg         | -0.211235 | 1 | -0.371296 | 15.5038  | 11.4053   | No change |
| NM_011607    | Tnc           | -0.211098 | 1 | -0.933451 | 0.59877  | 0.293231  | No change |

|              |               |           |   |           |          |          |           |
|--------------|---------------|-----------|---|-----------|----------|----------|-----------|
| NM_181323    | Cwh43         | -0.211098 | 1 | -0.933451 | 1.567    | 0.767393 | No change |
| NM_170592    | Mettl11a      | -0.210943 | 1 | -0.582277 | 11.9114  | 7.55073  | No change |
| NM_001005511 | Lmtk3         | -0.209231 | 1 | -1.74413  | 0.404184 | 0.104088 | No change |
| NM_138628    | Txlnb         | -0.209231 | 1 | -1.74413  | 0.437829 | 0.112752 | No change |
| NM_177445    | Dars          | -0.20877  | 1 | -0.337988 | 49.5532  | 37.3107  | No change |
| NM_026487    | Atad1         | -0.208261 | 1 | -0.330076 | 44.1248  | 33.4072  | No change |
| NR_029465    | Gm11149       | -0.20815  | 1 | -0.677559 | 7.32459  | 4.33561  | No change |
| NM_026909    | Thap7         | -0.20804  | 1 | -0.499896 | 19.6386  | 13.1987  | No change |
| NM_173396    | Tgif2         | -0.207592 | 1 | -0.587487 | 4.96915  | 3.13812  | No change |
| NM_030147    | Brd8          | -0.206474 | 1 | -0.347743 | 19.8484  | 14.8432  | No change |
| NM_001111317 | BC048609      | -0.205437 | 1 | -0.770668 | 12.3293  | 6.81814  | No change |
| NM_144895    | Spg20         | -0.205292 | 1 | -0.456361 | 8.05709  | 5.58374  | No change |
| NM_001145936 | Zfp691        | -0.20494  | 1 | -0.760614 | 4.31453  | 2.40361  | No change |
| NM_052976    | Ophn1         | -0.20456  | 1 | -0.495281 | 5.8491   | 3.94376  | No change |
| NM_178187    | Hist1h2ae     | -0.204546 | 1 | -0.726365 | 10.8895  | 6.22052  | No change |
| NM_016680    | Clasrp        | -0.204476 | 1 | -0.537417 | 8.25056  | 5.39932  | No change |
| NM_011521    | Sdc4          | -0.204378 | 1 | -0.411126 | 17.9898  | 12.8698  | No change |
| NM_028866    | Wdr33         | -0.203973 | 1 | -0.41613  | 6.78288  | 4.83542  | No change |
| NR_033520    | Tmem181b-ps   | -0.203973 | 1 | -0.41613  | 8.93727  | 6.37126  | No change |
| NM_001159603 | Pum1          | -0.203536 | 1 | -0.376394 | 11.7155  | 8.5875   | No change |
| NM_023873    | Cep70         | -0.203357 | 1 | -0.485607 | 9.43111  | 6.40245  | No change |
| NR_033148    | Lrch4-sap25   | -0.202954 | 1 | -0.442716 | 7.36617  | 5.15406  | No change |
| NM_001003909 | Ankib1        | -0.202686 | 1 | -0.347279 | 13.4009  | 10.0247  | No change |
| NM_033576    | Pcdhgb4       | -0.202515 | 1 | -0.417202 | 9.17831  | 6.53811  | No change |
| NM_133255    | Hook2         | -0.202331 | 1 | -0.495731 | 8.6284   | 5.8157   | No change |
| NM_001190975 | Axl           | -0.202306 | 1 | -0.372507 | 13.45    | 9.88568  | No change |
| NM_176953    | Lig4          | -0.200899 | 1 | -0.53498  | 4.32059  | 2.83223  | No change |
| NM_001012517 | Fut10         | -0.200834 | 1 | -0.935055 | 1.31119  | 0.640991 | No change |
| NM_144920    | Plekha5       | -0.200411 | 1 | -0.403544 | 8.90679  | 6.40566  | No change |
| NM_001166590 | Eif5a         | -0.19924  | 1 | -0.29422  | 142.288  | 110.448  | No change |
| NM_033590    | Pcdhga7       | -0.198992 | 1 | -0.409855 | 9.12485  | 6.53346  | No change |
| NM_001081360 | Camsap111     | -0.19882  | 1 | -0.328288 | 14.0312  | 10.636   | No change |
| NM_026832    | Cgrrf1        | -0.198756 | 1 | -0.527251 | 15.133   | 9.97429  | No change |
| NM_027296    | Trnt1         | -0.198499 | 1 | -0.392156 | 22.7047  | 16.4596  | No change |
| NM_145617    | Herc1         | -0.198483 | 1 | -0.295946 | 12.5803  | 9.75347  | No change |
| NM_009517    | Zmat3         | -0.198394 | 1 | -0.536561 | 2.21205  | 1.44837  | No change |
| NM_001163471 | Hectd2        | -0.198088 | 1 | -0.440541 | 6.81715  | 4.77702  | No change |
| NM_008542    | Smad6         | -0.196974 | 1 | -0.748642 | 2.32232  | 1.30485  | No change |
| NM_134068    | Dusp22        | -0.196974 | 1 | -0.748642 | 6.52136  | 3.66419  | No change |
| NM_153407    | Csrnp2        | -0.196567 | 1 | -0.456998 | 6.85781  | 4.75011  | No change |
| NM_026954    | Tusc1         | -0.196348 | 1 | -0.967065 | 2.7591   | 1.31582  | No change |
| NM_001162539 | Odf2l         | -0.196109 | 1 | -0.585636 | 5.73692  | 3.62707  | No change |
| NM_013735    | Trp53bp1      | -0.195994 | 1 | -0.312387 | 17.5204  | 13.4288  | No change |
| NM_177992    | Gmpr2         | -0.195968 | 1 | -0.623111 | 7.17693  | 4.41719  | No change |
| NM_020625    | Zbtb22        | -0.195639 | 1 | -0.425697 | 13.7675  | 9.74837  | No change |
| NM_028774    | Rnf6          | -0.195605 | 1 | -0.337391 | 27.6296  | 20.8112  | No change |
| NM_178797    | Far2          | -0.195257 | 1 | -0.387006 | 15.0177  | 10.9261  | No change |
| NM_008630    | Mt2           | -0.194295 | 1 | -0.431579 | 60.7933  | 42.868   | No change |
| NM_001168540 | Tsku          | -0.194018 | 1 | -0.682004 | 3.29844  | 1.94548  | No change |
| NR_033611    | Gm12669       | -0.193613 | 1 | -0.422198 | 35.915   | 25.4925  | No change |
| NM_023831    | Ift46         | -0.193159 | 1 | -0.53997  | 4.90795  | 3.20553  | No change |
| NR_029447    | E130317F20Rik | -0.192266 | 1 | -0.530732 | 4.76897  | 3.13524  | No change |
| NM_181585    | Pik3r3        | -0.191737 | 1 | -0.343543 | 16.0305  | 12.0225  | No change |
| NM_026861    | Ubac2         | -0.191667 | 1 | -0.434349 | 15.0128  | 10.5653  | No change |
| NM_025914    | Actr6         | -0.191593 | 1 | -0.47317  | 14.2823  | 9.7801   | No change |
| NM_021494    | Dennd5a       | -0.191221 | 1 | -0.333604 | 18.341   | 13.8511  | No change |
| NM_029936    | Ddx10         | -0.191088 | 1 | -0.397791 | 13.0778  | 9.44281  | No change |
| NM_172049    | Tmem18        | -0.191079 | 1 | -0.426448 | 11.5919  | 8.2033   | No change |
| NM_145473    | Csdc2         | -0.190693 | 1 | -1.05607  | 1.23152  | 0.547803 | No change |
| NM_001198565 | Sulf1         | -0.189921 | 1 | -0.63979  | 2.1699   | 1.3194   | No change |
| NM_018765    | Wbp4          | -0.189786 | 1 | -0.371929 | 16.2926  | 11.979   | No change |
| NM_001080964 | Sp2           | -0.189551 | 1 | -0.728604 | 2.36754  | 1.34963  | No change |
| NM_007880    | Arid3a        | -0.189326 | 1 | -0.668554 | 1.67493  | 0.997471 | No change |
| NM_010069    | Doc2a         | -0.189326 | 1 | -0.668554 | 3.51485  | 2.0932   | No change |
| NM_146206    | Tpcn2         | -0.189249 | 1 | -0.737002 | 2.39577  | 1.35734  | No change |
| NM_027498    | Sik3          | -0.189241 | 1 | -0.537341 | 2.58286  | 1.69001  | No change |
| NM_177752    | Eme1          | -0.189241 | 1 | -0.537341 | 7.28835  | 4.76888  | No change |
| NM_016876    | Eif3g         | -0.188585 | 1 | -0.317333 | 103.495  | 79.0507  | No change |
| NM_027062    | C8g           | -0.187718 | 1 | -0.611285 | 10.8098  | 6.70879  | No change |
| NM_028091    | Osgep1        | -0.18768  | 1 | -0.570118 | 5.95275  | 3.80495  | No change |
| NM_007968    | Ewsr1         | -0.187656 | 1 | -0.287886 | 75.2393  | 58.6592  | No change |
| NM_007552    | Bmi1          | -0.187503 | 1 | -0.351809 | 19.1006  | 14.2423  | No change |
| NM_133815    | Lbr           | -0.18695  | 1 | -0.411892 | 10.5167  | 7.51865  | No change |
| NM_026028    | Ccdc77        | -0.186368 | 1 | -0.454299 | 12.3234  | 8.55128  | No change |
| NM_145711    | Tox           | -0.186202 | 1 | -0.846617 | 1.73499  | 0.906197 | No change |
| NM_016852    | Wbp2          | -0.185599 | 1 | -0.341297 | 42.437   | 31.876   | No change |

|              |               |           |   |           |          |           |           |
|--------------|---------------|-----------|---|-----------|----------|-----------|-----------|
| NM_153414    | Ints9         | -0.185261 | 1 | -0.633026 | 3.78766  | 2.3141    | No change |
| NM_053254    | Tle6          | -0.185133 | 1 | -0.909992 | 2.07522  | 1.03322   | No change |
| NM_146200    | Eif3c         | -0.184278 | 1 | -0.260649 | 106.909  | 84.9435   | No change |
| NM_001040691 | Ung           | -0.184169 | 1 | -1.12061  | 1.40539  | 0.593927  | No change |
| NM_175163    | Zfp689        | -0.183936 | 1 | -0.636626 | 2.73306  | 1.66541   | No change |
| NR_028359    | 5830417110Rik | -0.183667 | 1 | -0.294217 | 15.1251  | 11.74     | No change |
| NM_028751    | Tjap1         | -0.183247 | 1 | -0.575059 | 5.06957  | 3.22877   | No change |
| NM_013674    | Irf4          | -0.183091 | 1 | -1.67042  | 0.446463 | 0.122641  | No change |
| NM_133252    | Tram2         | -0.183091 | 1 | -1.67042  | 1.50092  | 0.412296  | No change |
| NM_153072    | Hus1b         | -0.183091 | 1 | -1.67042  | 1.76289  | 0.484256  | No change |
| NM_001024917 | N4bp2         | -0.183032 | 1 | -0.398595 | 7.06536  | 5.0984    | No change |
| NM_001164559 | Trmt1         | -0.183012 | 1 | -0.455636 | 11.9437  | 8.27974   | No change |
| NM_001037761 | Capzb         | -0.182798 | 1 | -0.352628 | 39.0145  | 29.0738   | No change |
| NM_001003949 | ORF61         | -0.182264 | 1 | -0.381394 | 21.2245  | 15.5014   | No change |
| NM_001110201 | Yif1b         | -0.180943 | 1 | -0.416333 | 30.0877  | 21.4424   | No change |
| NM_145947    | Slc26a7       | -0.180708 | 1 | -0.752879 | 2.70424  | 1.51394   | No change |
| NM_001033498 | Gramd2        | -0.180254 | 1 | -1.77923  | 1.27363  | 0.314873  | No change |
| NM_001195413 | Cngb1         | -0.180254 | 1 | -1.77923  | 0.281428 | 0.0695761 | No change |
| NR_024097    | Gm14057       | -0.180254 | 1 | -1.77923  | 0.815695 | 0.20166   | No change |
| NM_026836    | Taf11         | -0.179711 | 1 | -0.532785 | 12.9103  | 8.47369   | No change |
| NM_010897    | Nf1           | -0.179665 | 1 | -0.315417 | 8.38292  | 6.41131   | No change |
| NM_177660    | Zbtb10        | -0.17955  | 1 | -0.381208 | 6.1758   | 4.51103   | No change |
| NM_007917    | Eif4e         | -0.179352 | 1 | -0.330652 | 27.882   | 21.0989   | No change |
| NM_001170978 | Abat          | -0.179182 | 1 | -0.40918  | 7.98809  | 5.72142   | No change |
| NM_026189    | Eepd1         | -0.178756 | 1 | -0.938613 | 1.43401  | 0.698304  | No change |
| NM_001004435 | Pik3r6        | -0.178144 | 1 | -1.18871  | 0.777968 | 0.311651  | No change |
| NM_028022    | Gatsl3        | -0.178144 | 1 | -1.18871  | 1.62077  | 0.649272  | No change |
| NM_009010    | Rad23a        | -0.177729 | 1 | -0.38091  | 21.842   | 15.9574   | No change |
| NM_145407    | Usp19         | -0.177611 | 1 | -0.350879 | 13.3013  | 9.92409   | No change |
| NM_025994    | Efh2          | -0.177553 | 1 | -0.449877 | 10.8301  | 7.5379    | No change |
| NM_001077631 | 2010321M09Rik | -0.176995 | 1 | -0.46889  | 7.81603  | 5.36755   | No change |
| NM_020491    | Ssca1         | -0.175049 | 1 | -0.567323 | 18.6858  | 11.9652   | No change |
| NM_007497    | Atf1          | -0.174819 | 1 | -0.483513 | 8.70788  | 5.91836   | No change |
| NM_001007568 | Zfp251        | -0.174426 | 1 | -0.480889 | 5.87244  | 3.99864   | No change |
| NM_147155    | Tagap1        | -0.173999 | 1 | -0.361022 | 22.5216  | 16.6842   | No change |
| NM_020271    | Pdxp          | -0.173946 | 1 | -0.910807 | 2.02009  | 1.00457   | No change |
| NM_025695    | Smc6          | -0.173603 | 1 | -0.329966 | 13.4211  | 10.1607   | No change |
| NM_001113420 | Schip1        | -0.172878 | 1 | -1.38865  | 1.49828  | 0.514463  | No change |
| NM_177081    | Ptpn7         | -0.172878 | 1 | -1.38865  | 0.704616 | 0.241943  | No change |
| NM_018807    | Plagl2        | -0.172715 | 1 | -0.489386 | 3.57036  | 2.41649   | No change |
| NM_010424    | Hfe           | -0.171827 | 1 | -0.613461 | 5.98987  | 3.71045   | No change |
| NM_144922    | Hnrnpul1      | -0.171806 | 1 | -0.265591 | 71.1969  | 56.3733   | No change |
| NM_009681    | Ap3s1         | -0.171793 | 1 | -0.433633 | 18.7544  | 13.2029   | No change |
| NM_027009    | Rfc3          | -0.171778 | 1 | -0.579306 | 9.866    | 6.26325   | No change |
| NM_021464    | Ptprt         | -0.171766 | 1 | -0.771974 | 0.90777  | 0.500945  | No change |
| NM_001145164 | Tgtp2         | -0.171697 | 1 | -0.570643 | 4.42848  | 2.82882   | No change |
| NM_011579    | Tgtp1         | -0.171697 | 1 | -0.570643 | 4.4411   | 2.83688   | No change |
| NM_172765    | Zbtb44        | -0.171541 | 1 | -0.302767 | 12.0097  | 9.26624   | No change |
| NM_001114399 | Zmym4         | -0.170571 | 1 | -0.283567 | 20.2277  | 15.817    | No change |
| NM_145486    | March2        | -0.170543 | 1 | -0.433353 | 8.03758  | 5.65943   | No change |
| NM_030714    | Dtx3          | -0.170389 | 1 | -0.381673 | 21.546   | 15.732    | No change |
| NM_028053    | Tmem38b       | -0.17018  | 1 | -0.616538 | 3.53215  | 2.18309   | No change |
| NM_001174079 | Smarca4       | -0.169588 | 1 | -0.338412 | 10.1626  | 7.64838   | No change |
| NM_028193    | Brf1          | -0.16937  | 1 | -0.365755 | 17.5054  | 12.925    | No change |
| NM_031156    | Ide           | -0.169299 | 1 | -0.255448 | 48.6615  | 38.8024   | No change |
| NM_134046    | Cenpo         | -0.169283 | 1 | -0.434489 | 6.22631  | 4.38052   | No change |
| NM_018736    | Mre11a        | -0.168954 | 1 | -0.550961 | 4.50081  | 2.91561   | No change |
| NM_001110100 | Banp          | -0.168521 | 1 | -0.696875 | 1.35649  | 0.79094   | No change |
| NM_026450    | Zfp169        | -0.167799 | 1 | -0.476057 | 4.84487  | 3.31      | No change |
| NM_026448    | Kih1          | -0.1672   | 1 | -0.393683 | 10.6766  | 7.73005   | No change |
| NM_177128    | lqcb1         | -0.167187 | 1 | -0.515307 | 7.10149  | 4.71851   | No change |
| NM_025905    | Ttc23         | -0.166972 | 1 | -0.44842  | 10.2307  | 7.12732   | No change |
| NM_013753    | X99384        | -0.166885 | 1 | -0.595803 | 2.54378  | 1.59573   | No change |
| NM_145940    | Wipi1         | -0.166475 | 1 | -0.5114   | 9.01367  | 6.00563   | No change |
| NM_011078    | Phf2          | -0.166246 | 1 | -0.374855 | 8.14851  | 5.97803   | No change |
| NM_019656    | Tspan6        | -0.165787 | 1 | -0.342603 | 33.4827  | 25.1248   | No change |
| NM_172739    | Grf1          | -0.164411 | 1 | -0.27583  | 17.3215  | 13.6174   | No change |
| NM_023668    | Ndel1         | -0.16439  | 1 | -0.329158 | 28.6139  | 21.6739   | No change |
| NM_030135    | 8030411F24Rik | -0.164228 | 1 | -1.60861  | 3.71077  | 1.07507   | No change |
| NM_023503    | Ing2          | -0.164125 | 1 | -0.547865 | 4.75686  | 3.08806   | No change |
| NM_010364    | Gtf2h4        | -0.163587 | 1 | -0.554939 | 7.9933   | 5.1629    | No change |
| NM_026201    | Ccar1         | -0.162895 | 1 | -0.290668 | 24.8081  | 19.3024   | No change |
| NM_019413    | Robo1         | -0.162653 | 1 | -0.757821 | 0.782756 | 0.436362  | No change |
| NM_153140    | Rab11fip3     | -0.162595 | 1 | -0.388646 | 11.2071  | 8.1426    | No change |
| NM_026748    | Ints1         | -0.162519 | 1 | -0.349373 | 7.44645  | 5.5612    | No change |
| NM_015796    | Fbxo17        | -0.162268 | 1 | -1.13407  | 1.31028  | 0.547187  | No change |

|              |               |           |   |           |          |          |           |
|--------------|---------------|-----------|---|-----------|----------|----------|-----------|
| NM_030159    | Troap         | -0.162268 | 1 | -1.13407  | 1.13797  | 0.475227 | No change |
| NM_175407    | Sobp          | -0.162268 | 1 | -1.13407  | 0.517799 | 0.216238 | No change |
| NM_145416    | Kri1          | -0.162212 | 1 | -0.400286 | 12.769   | 9.20185  | No change |
| NM_175160    | Zdhhc1        | -0.162205 | 1 | -0.466291 | 10.1112  | 6.95541  | No change |
| NM_027816    | Cyp2u1        | -0.162188 | 1 | -0.91168  | 1.6743   | 0.831556 | No change |
| NM_001110017 | Dzip3         | -0.161747 | 1 | -0.34512  | 9.51621  | 7.12809  | No change |
| NM_001142441 | Gm10094       | -0.161604 | 1 | -0.392207 | 45.2691  | 32.8082  | No change |
| NM_181407    | Me3           | -0.1614   | 1 | -1.07377  | 0.637922 | 0.279278 | No change |
| NM_027911    | Raver1        | -0.160904 | 1 | -0.417828 | 8.31943  | 5.92176  | No change |
| NM_001163475 | Zfp746        | -0.160321 | 1 | -0.461647 | 5.78388  | 3.99166  | No change |
| NM_009911    | Cxcr4         | -0.160304 | 1 | -0.977293 | 1.84414  | 0.870673 | No change |
| NM_015767    | Ttpa          | -0.160304 | 1 | -0.977293 | 1.09573  | 0.517328 | No change |
| NM_172894    | Ppp6r1        | -0.160093 | 1 | -0.262771 | 44.9247  | 35.64    | No change |
| NM_033327    | Zfp423        | -0.159846 | 1 | -0.557819 | 2.54229  | 1.6386   | No change |
| NM_026508    | Trap1         | -0.159178 | 1 | -0.289867 | 46.2091  | 35.9736  | No change |
| NM_177324    | Sbf2          | -0.159089 | 1 | -0.258276 | 25.4526  | 20.2554  | No change |
| NM_016796    | Vamp4         | -0.158527 | 1 | -0.457168 | 8.47766  | 5.86917  | No change |
| NM_176962    | Zfp944        | -0.15827  | 1 | -0.440081 | 8.61148  | 6.03415  | No change |
| NM_015753    | Zeb2          | -0.157893 | 1 | -0.420734 | 3.00552  | 2.1349   | No change |
| NM_018877    | Setdb1        | -0.157394 | 1 | -0.315999 | 15.7269  | 12.0221  | No change |
| NM_010166    | Eya3          | -0.157337 | 1 | -0.40541  | 5.89844  | 4.23521  | No change |
| NM_011914    | Whsc2         | -0.157269 | 1 | -0.463766 | 9.44934  | 6.51135  | No change |
| NM_133992    | Pan2          | -0.157145 | 1 | -0.461458 | 4.66294  | 3.21838  | No change |
| NM_133716    | Smcp2         | -0.157072 | 1 | -0.431795 | 8.66064  | 6.10409  | No change |
| NM_146155    | Ahdc1         | -0.15697  | 1 | -0.407413 | 4.54978  | 3.26224  | No change |
| NM_172422    | Fastkd2       | -0.15682  | 1 | -0.452845 | 6.80621  | 4.72633  | No change |
| NM_007684    | Cetn3         | -0.156608 | 1 | -0.391858 | 33.4361  | 24.2374  | No change |
| NM_019982    | Sez6l         | -0.156169 | 1 | -0.863425 | 0.713383 | 0.367429 | No change |
| NM_172737    | Shisa7        | -0.156169 | 1 | -0.863425 | 0.719321 | 0.370488 | No change |
| NM_011894    | Sh3bp5        | -0.156035 | 1 | -0.425665 | 10.5399  | 7.46069  | No change |
| NM_145374    | Mios          | -0.155368 | 1 | -0.372078 | 10.7061  | 7.8691   | No change |
| NM_001033448 | Gm962         | -0.155349 | 1 | -0.52435  | 4.64319  | 3.06482  | No change |
| NM_175770    | Taf7          | -0.155289 | 1 | -0.439538 | 7.13392  | 5.00058  | No change |
| NM_153417    | Trpm6         | -0.155081 | 1 | -0.588944 | 1.62749  | 1.02574  | No change |
| NM_001110142 | Cul4b         | -0.154634 | 1 | -0.30581  | 15.7691  | 12.1403  | No change |
| NM_015830    | Solh          | -0.154558 | 1 | -0.506652 | 4.76913  | 3.1878   | No change |
| NM_145929    | Gga1          | -0.154403 | 1 | -0.471108 | 6.31693  | 4.33017  | No change |
| NM_009250    | Serpini1      | -0.154383 | 1 | -0.843076 | 1.44591  | 0.756177 | No change |
| NM_029012    | Sppl3         | -0.154263 | 1 | -0.429631 | 8.88171  | 6.26929  | No change |
| NM_178627    | Poldip3       | -0.153782 | 1 | -0.289633 | 30.2239  | 23.5326  | No change |
| NM_026696    | 0610030E20Rik | -0.153414 | 1 | -0.41193  | 6.09099  | 4.35332  | No change |
| NM_175277    | Bola3         | -0.15335  | 1 | -0.54845  | 23.8008  | 15.4418  | No change |
| NM_001002272 | Tro           | -0.153143 | 1 | -0.754901 | 0.874983 | 0.488669 | No change |
| NM_009628    | Adnp          | -0.153102 | 1 | -0.263101 | 30.2766  | 24.0133  | No change |
| NM_001081109 | Lmtk2         | -0.152921 | 1 | -0.374212 | 4.68971  | 3.44179  | No change |
| NM_178051    | Mterfd2       | -0.15247  | 1 | -0.433955 | 7.23209  | 5.08925  | No change |
| NM_026255    | Slc25a26      | -0.152243 | 1 | -0.793036 | 2.68748  | 1.45901  | No change |
| NM_001048176 | Cerkl         | -0.152091 | 1 | -1.82474  | 0.871657 | 0.204068 | No change |
| NM_010790    | Melk          | -0.152091 | 1 | -1.82474  | 0.526165 | 0.123183 | No change |
| NM_001001983 | Pi4ka         | -0.151777 | 1 | -0.260127 | 23.7656  | 18.8882  | No change |
| NM_001159383 | Gjc1          | -0.150993 | 1 | -0.66193  | 3.94821  | 2.36035  | No change |
| NM_153060    | Spns2         | -0.150993 | 1 | -0.66193  | 2.4084   | 1.43981  | No change |
| NM_001083114 | Pphln1        | -0.150398 | 1 | -0.405173 | 7.71481  | 5.54002  | No change |
| NM_172405    | Fam175a       | -0.150264 | 1 | -0.531862 | 5.38245  | 3.53353  | No change |
| NM_001035532 | Akap2         | -0.150168 | 1 | -0.406218 | 4.20402  | 3.01669  | No change |
| NM_008420    | Kcnb1         | -0.149811 | 1 | -0.912617 | 1.01167  | 0.501765 | No change |
| NM_001033228 | Itga1         | -0.149649 | 1 | -0.344544 | 8.12036  | 6.08459  | No change |
| NM_173189    | Mcp1          | -0.148656 | 1 | -0.521989 | 3.03275  | 2.00499  | No change |
| NM_028800    | Stk40         | -0.148556 | 1 | -0.406823 | 8.04837  | 5.77276  | No change |
| NM_009023    | Rapsn         | -0.148522 | 1 | -1.6935   | 1.16155  | 0.310208 | No change |
| NR_027966    | 4930429B21Rik | -0.148522 | 1 | -1.6935   | 0.964979 | 0.257711 | No change |
| NM_138953    | Eil2          | -0.148328 | 1 | -0.328755 | 15.4512  | 11.7061  | No change |
| NM_026283    | Samd8         | -0.147667 | 1 | -0.313306 | 9.51218  | 7.28478  | No change |
| NM_008033    | Fnta          | -0.14712  | 1 | -0.302972 | 39.8298  | 30.7239  | No change |
| NM_019840    | Pde4b         | -0.14705  | 1 | -0.539342 | 2.91782  | 1.90523  | No change |
| NM_029786    | Pomgnt1       | -0.146507 | 1 | -0.388646 | 12.183   | 8.85057  | No change |
| NM_172958    | Mttr12        | -0.145831 | 1 | -0.386574 | 7.14206  | 5.19603  | No change |
| NM_010434    | Hpk3          | -0.145398 | 1 | -0.239176 | 27.0181  | 21.7882  | No change |
| NM_001013405 | D9Ert402e     | -0.145268 | 1 | -0.528593 | 4.38017  | 2.88203  | No change |
| NM_024451    | Sun1          | -0.145172 | 1 | -0.31969  | 14.8115  | 11.2926  | No change |
| NM_001114097 | Smarcc2       | -0.145087 | 1 | -0.357897 | 8.28972  | 6.15351  | No change |
| NM_001134791 | Osbpl9        | -0.145045 | 1 | -0.26348  | 41.1791  | 32.6512  | No change |
| NM_175937    | Cpeb2         | -0.143981 | 1 | -0.307059 | 10.0408  | 7.72308  | No change |
| NM_028860    | Mttr3         | -0.14398  | 1 | -0.282467 | 16.6064  | 12.9942  | No change |
| NM_023854    | Arfgap2       | -0.143943 | 1 | -0.337902 | 14.5306  | 10.9382  | No change |
| NM_033585    | Pcdhga2       | -0.143633 | 1 | -0.356007 | 9.04764  | 6.72496  | No change |

|              |               |           |   |           |          |           |           |
|--------------|---------------|-----------|---|-----------|----------|-----------|-----------|
| NM_001164231 | Pwvwp2a       | -0.143433 | 1 | -0.453559 | 4.84924  | 3.3652    | No change |
| NM_001007220 | Adam22        | -0.143268 | 1 | -0.751844 | 2.03282  | 1.13749   | No change |
| NM_011908    | Ubl3          | -0.143015 | 1 | -0.259917 | 49.2058  | 39.1122   | No change |
| NM_172289    | Slc36a4       | -0.14278  | 1 | -0.841751 | 2.26673  | 1.18602   | No change |
| NM_007523    | Bak1          | -0.142762 | 1 | -0.619359 | 4.42108  | 2.72533   | No change |
| NM_009458    | Ube2b         | -0.142322 | 1 | -0.288244 | 40.0119  | 31.1826   | No change |
| NM_001039554 | Angptl7       | -0.141861 | 1 | -0.776521 | 2.5349   | 1.39265   | No change |
| NM_001025246 | Trp53i11      | -0.141858 | 1 | -0.44686  | 7.69712  | 5.36679   | No change |
| NM_146207    | Cul4a         | -0.141677 | 1 | -0.32141  | 15.6218  | 11.8959   | No change |
| NM_027937    | Caskin1       | -0.141103 | 1 | -0.663753 | 1.20783  | 0.720933  | No change |
| NM_001136082 | Timeless      | -0.141009 | 1 | -0.945039 | 0.766372 | 0.370555  | No change |
| NM_029153    | Scamp1        | -0.140827 | 1 | -0.25946  | 35.5069  | 28.2322   | No change |
| NM_009498    | Vamp3         | -0.139903 | 1 | -0.316038 | 27.8442  | 21.2827   | No change |
| NM_001081111 | Tmf1          | -0.139513 | 1 | -0.211147 | 50.6895  | 41.6813   | No change |
| NM_139228    | Rhbdl3        | -0.13943  | 1 | -1.20807  | 0.629031 | 0.247752  | No change |
| NR_033565    | BB019430      | -0.138586 | 1 | -1.03054  | 2.1647   | 0.978968  | No change |
| NM_173744    | 2610019F03Rik | -0.138528 | 1 | -0.32841  | 20.656   | 15.6524   | No change |
| NM_144525    | Tmem214       | -0.138497 | 1 | -0.337746 | 16.7798  | 12.6323   | No change |
| NM_001038708 | Cdc42se1      | -0.138392 | 1 | -0.444277 | 22.5614  | 15.759    | No change |
| NM_025389    | Anapc11       | -0.138251 | 1 | -0.483545 | 5.00736  | 3.40168   | No change |
| NM_172748    | Fbxl19        | -0.137683 | 1 | -0.432573 | 6.39704  | 4.50536   | No change |
| NM_001002004 | 2610507B11Rik | -0.137125 | 1 | -0.216873 | 37.3325  | 30.576    | No change |
| NM_011800    | Cdh20         | -0.136783 | 1 | -2.10854  | 0.24342  | 0.0385766 | No change |
| NM_028292    | Ppme1         | -0.136628 | 1 | -0.322916 | 22.3454  | 16.9975   | No change |
| NM_053092    | Kars          | -0.136355 | 1 | -0.285595 | 40.7387  | 31.807    | No change |
| NM_025555    | 2410004B18Rik | -0.136037 | 1 | -0.631216 | 8.43463  | 5.15422   | No change |
| NM_145421    | Fam108a       | -0.135891 | 1 | -0.32758  | 33.8765  | 25.6849   | No change |
| NM_025504    | Atp5sl        | -0.135813 | 1 | -0.460137 | 7.614    | 5.25886   | No change |
| NM_144932    | Acsf3         | -0.135806 | 1 | -0.589163 | 4.38936  | 2.76494   | No change |
| NM_172555    | Papolg        | -0.135517 | 1 | -0.381353 | 8.20244  | 5.98894   | No change |
| NR_038037    | E130307A14Rik | -0.135113 | 1 | -0.682612 | 4.10451  | 2.41604   | No change |
| NM_011762    | Zfp59         | -0.134605 | 1 | -0.418564 | 6.16882  | 4.38765   | No change |
| NM_011352    | Sema7a        | -0.133993 | 1 | -0.580337 | 3.04308  | 1.92904   | No change |
| NM_011701    | Vim           | -0.133752 | 1 | -0.401815 | 14.2502  | 10.2559   | No change |
| NM_001081557 | Camta1        | -0.133386 | 1 | -0.59186  | 1.12195  | 0.705333  | No change |
| NM_177030    | Dock6         | -0.132822 | 1 | -0.443435 | 3.00657  | 2.10122   | No change |
| NM_001013360 | Npcd          | -0.132476 | 1 | -0.495125 | 3.20934  | 2.16219   | No change |
| NM_029673    | Immt          | -0.132134 | 1 | -0.269064 | 34.8718  | 27.5416   | No change |
| NM_133726    | St13          | -0.132097 | 1 | -0.230162 | 113.777  | 92.328    | No change |
| NM_001172481 | Aspn          | -0.1319   | 1 | -0.760614 | 2.26935  | 1.26111   | No change |
| NM_007607    | Car4          | -0.131793 | 1 | -0.861898 | 3.10938  | 1.60149   | No change |
| NM_001033173 | Usp31         | -0.131714 | 1 | -0.335671 | 4.33274  | 3.26643   | No change |
| NM_016893    | Fut8          | -0.131168 | 1 | -0.356265 | 11.9696  | 8.89446   | No change |
| NM_199009    | Fam160a2      | -0.131059 | 1 | -0.374122 | 9.23518  | 6.7771    | No change |
| NM_020610    | Nrip3         | -0.130338 | 1 | -0.787965 | 1.24674  | 0.678831  | No change |
| NM_177857    | Dennd2c       | -0.130338 | 1 | -0.787965 | 0.980801 | 0.53403   | No change |
| NM_001159589 | Sirt1         | -0.130294 | 1 | -0.350183 | 10.069   | 7.51411   | No change |
| NM_178907    | Mapkapk3      | -0.129275 | 1 | -0.705573 | 2.20265  | 1.2747    | No change |
| NM_133834    | Hnrnpf        | -0.129179 | 1 | -0.200106 | 161.425  | 133.758   | No change |
| NM_028930    | Tmc5          | -0.12914  | 1 | -0.3667   | 11.2462  | 8.29585   | No change |
| NM_145471    | Lrrc14        | -0.12873  | 1 | -0.445018 | 8.35581  | 5.83282   | No change |
| NM_019674    | Ppp4c         | -0.128671 | 1 | -0.31098  | 41.1774  | 31.5837   | No change |
| NM_008260    | Foxa3         | -0.128001 | 1 | -1.88615  | 0.649419 | 0.140836  | No change |
| NM_173404    | Bmp3          | -0.128001 | 1 | -1.88615  | 0.425503 | 0.0922763 | No change |
| NM_001081199 | Mamdc4        | -0.127416 | 1 | -0.714379 | 1.50215  | 0.863651  | No change |
| NM_007772    | Hivep1        | -0.12738  | 1 | -0.354341 | 4.10052  | 3.0511    | No change |
| NM_001114098 | 1110012J17Rik | -0.12645  | 1 | -0.509378 | 1.81941  | 1.21329   | No change |
| NM_001177774 | Fbxw7         | -0.125774 | 1 | -0.352207 | 8.84637  | 6.59215   | No change |
| NM_146173    | Tspan33       | -0.125621 | 1 | -0.723874 | 2.95279  | 1.68575   | No change |
| NM_026033    | Gatad1        | -0.12548  | 1 | -0.272796 | 32.5617  | 25.6497   | No change |
| NM_016843    | Atxn10        | -0.125145 | 1 | -0.337877 | 16.755   | 12.6115   | No change |
| NM_001081213 | Ermp1         | -0.124527 | 1 | -0.31296  | 9.52238  | 7.29356   | No change |
| NM_145991    | Cdc73         | -0.12391  | 1 | -0.398417 | 9.29066  | 6.70192   | No change |
| NM_023440    | Tmem86b       | -0.123843 | 1 | -0.685847 | 5.30396  | 3.11368   | No change |
| NM_001037711 | Cgn           | -0.123555 | 1 | -0.298916 | 11.7169  | 9.06293   | No change |
| NM_145148    | Frm4b         | -0.123187 | 1 | -0.387397 | 5.32155  | 3.86863   | No change |
| NM_175647    | Dmrta1        | -0.123181 | 1 | -0.604002 | 2.12176  | 1.32196   | No change |
| NM_001024806 | Cebpz         | -0.123053 | 1 | -0.306123 | 13.3164  | 10.2483   | No change |
| NM_013917    | Pttg1         | -0.122973 | 1 | -0.352765 | 20.7017  | 15.4202   | No change |
| NM_001039198 | Zfhx2         | -0.122333 | 1 | -0.745283 | 0.615126 | 0.345624  | No change |
| NM_134048    | Cbl1          | -0.121941 | 1 | -0.562256 | 5.47641  | 3.51613   | No change |
| NM_145506    | Epb4.115      | -0.121809 | 1 | -0.322766 | 6.95859  | 5.29334   | No change |
| NM_146241    | Trhde         | -0.121762 | 1 | -1.34558  | 0.389754 | 0.138011  | No change |
| NR_029458    | A530088E08Rik | -0.121762 | 1 | -1.34558  | 1.24244  | 0.439945  | No change |
| NM_001024952 | Rc3h1         | -0.121299 | 1 | -0.264772 | 7.91807  | 6.27217   | No change |
| NM_007636    | Cct2          | -0.121059 | 1 | -0.202741 | 134.271  | 111.053   | No change |

|              |               |            |   |           |          |           |           |
|--------------|---------------|------------|---|-----------|----------|-----------|-----------|
| NM_001142727 | 1110065P20Rik | -0.121035  | 1 | -0.358214 | 43.1694  | 32.0327   | No change |
| NM_008398    | Itga7         | -0.120896  | 1 | -0.757412 | 1.2829   | 0.714338  | No change |
| NM_145359    | Fam100a       | -0.120809  | 1 | -0.441582 | 13.3251  | 9.3235    | No change |
| NM_139309    | Fktn          | -0.120712  | 1 | -0.392273 | 7.50095  | 5.43421   | No change |
| NM_010481    | Hspa9         | -0.120344  | 1 | -0.198209 | 95.1462  | 78.9417   | No change |
| NM_177372    | Dna2          | -0.12028   | 1 | -0.886145 | 0.8961   | 0.45283   | No change |
| NM_178878    | Hadha         | -0.119582  | 1 | -0.216523 | 48.994   | 40.1356   | No change |
| NM_001033331 | Gas2l3        | -0.118649  | 1 | -0.785216 | 0.702612 | 0.383169  | No change |
| NM_019499    | Mad2l1        | -0.117976  | 1 | -0.646194 | 4.20178  | 2.5387    | No change |
| NM_001171512 | Obscn         | -0.11786   | 1 | -1.0956   | 0.103877 | 0.0445851 | No change |
| NM_175290    | Nlrp4f        | -0.11786   | 1 | -1.0956   | 0.711354 | 0.30532   | No change |
| NR_015502    | E030003E18Rik | -0.11786   | 1 | -1.0956   | 2.31239  | 0.992502  | No change |
| NM_001081679 | Tomt          | -0.117832  | 1 | -0.838839 | 3.0481   | 1.59654   | No change |
| NM_181397    | Rftn1         | -0.117832  | 1 | -0.838839 | 1.46748  | 0.76864   | No change |
| NM_026493    | Cspp1         | -0.117776  | 1 | -0.361326 | 7.17098  | 5.3093    | No change |
| NM_178923    | Scaf4         | -0.116583  | 1 | -0.388315 | 6.05083  | 4.39572   | No change |
| NM_018868    | Nop58         | -0.116353  | 1 | -0.397107 | 12.027   | 8.68322   | No change |
| NM_145837    | Ii17d         | -0.116009  | 1 | -1.97361  | 0.91251  | 0.176246  | No change |
| NM_176942    | Gabra5        | -0.116009  | 1 | -1.97361  | 0.417011 | 0.0805433 | No change |
| NM_176963    | Galm          | -0.115733  | 1 | -0.474467 | 6.64334  | 4.5409    | No change |
| NM_173785    | A230051G13Rik | -0.115547  | 1 | -0.599841 | 2.11296  | 1.32021   | No change |
| NM_001081266 | Ccdc142       | -0.115285  | 1 | -0.55826  | 3.20735  | 2.06494   | No change |
| NM_001160039 | Ndufs1        | -0.114539  | 1 | -0.246747 | 36.8474  | 29.5564   | No change |
| NM_001145452 | Arhgef33      | -0.114231  | 1 | -0.681787 | 1.94482  | 1.14478   | No change |
| NM_009353    | Terf2         | -0.113983  | 1 | -0.40798  | 8.16224  | 5.84784   | No change |
| NM_146055    | 2610301G19Rik | -0.113908  | 1 | -0.281091 | 17.4232  | 13.6449   | No change |
| NM_027405    | 1700020O03Rik | -0.113612  | 1 | -0.34134  | 9.05172  | 6.79624   | No change |
| NM_028611    | 2410091C18Rik | -0.113609  | 1 | -0.467833 | 6.62734  | 4.55123   | No change |
| NM_153416    | Aaas          | -0.113479  | 1 | -0.423473 | 10.8224  | 7.6693    | No change |
| NM_018748    | Golga4        | -0.113444  | 1 | -0.183449 | 47.2916  | 39.6414   | No change |
| NM_026483    | Mphosph10     | -0.113249  | 1 | -0.373771 | 12.4384  | 9.12873   | No change |
| NM_027204    | Mrpl12        | -0.112912  | 1 | -0.435752 | 19.1674  | 13.4655   | No change |
| NM_172265    | Eif2b5        | -0.112471  | 1 | -0.337638 | 14.1785  | 10.6731   | No change |
| NM_026053    | Gemin6        | -0.112415  | 1 | -0.560159 | 9.04853  | 5.81732   | No change |
| NM_001077695 | Ncoa2         | -0.112397  | 1 | -0.224611 | 17.5582  | 14.3026   | No change |
| NM_001001980 | Limch1        | -0.111923  | 1 | -0.458562 | 2.5871   | 1.78835   | No change |
| NM_011372    | St6galnac3    | -0.111828  | 1 | -1.72265  | 0.430536 | 0.110874  | No change |
| NM_009212    | Ighmbp2       | -0.111418  | 1 | -0.552408 | 1.81688  | 1.17457   | No change |
| NM_173760    | Ppip5k2       | -0.111395  | 1 | -0.26031  | 14.5147  | 11.533    | No change |
| NM_001111291 | Caprin1       | -0.11095   | 1 | -0.195438 | 69.4367  | 57.7211   | No change |
| NM_027259    | Polr2i        | -0.109083  | 1 | -0.641908 | 10.3024  | 6.24269   | No change |
| NM_153530    | Dis3l2        | -0.108886  | 1 | -0.43278  | 5.76877  | 4.06104   | No change |
| NM_001081223 | Rbbp8         | -0.108356  | 1 | -0.400068 | 6.46593  | 4.65819   | No change |
| NM_145227    | Oas2          | -0.108306  | 1 | -0.915893 | 0.865751 | 0.427327  | No change |
| NM_033618    | Supt16h       | -0.108275  | 1 | -0.209537 | 38.2372  | 31.4755   | No change |
| NM_001048146 | Azi2          | -0.107651  | 1 | -0.381276 | 9.6473   | 7.0427    | No change |
| NM_029086    | 5830415F09Rik | -0.107632  | 1 | -0.546659 | 6.53092  | 4.23926   | No change |
| NM_013822    | Jag1          | -0.106597  | 1 | -0.358547 | 5.30341  | 3.93393   | No change |
| NM_172882    | Wdfy3         | -0.106508  | 1 | -0.222219 | 9.25041  | 7.54768   | No change |
| NR_028385    | Gm10190       | -0.106416  | 1 | -0.782309 | 2.72819  | 1.49032   | No change |
| NM_001024135 | Kbtbd7        | -0.10629   | 1 | -0.311253 | 9.57354  | 7.34082   | No change |
| NM_178242    | Tnrc18        | -0.105803  | 1 | -0.38054  | 3.97475  | 2.9031    | No change |
| NM_008575    | Mdm4          | -0.105546  | 1 | -0.226137 | 34.8864  | 28.3873   | No change |
| NM_001167918 | D830031N03Rik | -0.105347  | 1 | -0.355369 | 3.55551  | 2.64325   | No change |
| NM_010847    | Mxi1          | -0.104814  | 1 | -0.293321 | 10.1973  | 7.9177    | No change |
| NM_023625    | Pldb2         | -0.10476   | 1 | -0.301183 | 13.0856  | 10.1047   | No change |
| NM_178785    | Rasal3        | -0.104379  | 1 | -0.837236 | 1.08036  | 0.566206  | No change |
| NM_027727    | Dym           | -0.104199  | 1 | -0.423279 | 7.50236  | 5.31677   | No change |
| NM_134025    | Pex12         | -0.103587  | 1 | -0.39551  | 8.05329  | 5.82018   | No change |
| NM_011580    | Thbs1         | -0.102904  | 1 | -0.527691 | 1.86184  | 1.22498   | No change |
| NM_146218    | Rfwd3         | -0.102856  | 1 | -0.246234 | 19.5134  | 15.6573   | No change |
| NM_001045864 | Rdbp          | -0.102798  | 1 | -0.333604 | 21.384   | 16.1418   | No change |
| NM_011811    | Farsb         | -0.102639  | 1 | -0.277504 | 27.6222  | 21.6855   | No change |
| NM_172965    | Sap130        | -0.102541  | 1 | -0.381673 | 5.95384  | 4.34501   | No change |
| NM_001077595 | Shroom3       | -0.102302  | 1 | -0.326129 | 5.3453   | 4.05611   | No change |
| NM_138755    | Phf21a        | -0.102277  | 1 | -0.389383 | 3.57936  | 2.598     | No change |
| NM_145568    | Krcc1         | -0.101907  | 1 | -0.252358 | 45.1072  | 36.0392   | No change |
| NM_134089    | Scrib         | -0.101857  | 1 | -0.206509 | 28.9476  | 23.8786   | No change |
| NM_023456    | Npy           | -0.101459  | 1 | -0.685232 | 10.9974  | 6.4546    | No change |
| NM_001164561 | Exosc1        | -0.0998385 | 1 | -0.478602 | 8.92665  | 6.08236   | No change |
| NM_009504    | Vdr           | -0.099631  | 1 | -0.738047 | 1.16849  | 0.65954   | No change |
| NM_028925    | Polr3c        | -0.0995328 | 1 | -0.389777 | 12.3398  | 8.95389   | No change |
| NM_029320    | Pibf1         | -0.0994452 | 1 | -0.394085 | 6.58365  | 4.76265   | No change |
| NM_008452    | Klf2          | -0.0993388 | 1 | -1.04661  | 1.41996  | 0.63252   | No change |
| NM_026849    | Mtmt14        | -0.0992837 | 1 | -0.516622 | 4.16699  | 2.76325   | No change |
| NM_001113419 | Iqj-schip1    | -0.0990526 | 1 | -0.99577  | 1.163    | 0.539106  | No change |



|              |               |            |   |           |          |          |           |
|--------------|---------------|------------|---|-----------|----------|----------|-----------|
| NM_153394    | Gpr156        | -0.0990526 | 1 | -0.99577  | 0.608274 | 0.281963 | No change |
| NM_025822    | Rsrc1         | -0.0988368 | 1 | -0.32591  | 10.9758  | 8.32971  | No change |
| NM_010830    | Msh6          | -0.0979947 | 1 | -0.317124 | 8.90984  | 6.80355  | No change |
| NM_001167944 | Zkscan5       | -0.0970166 | 1 | -0.343916 | 8.43405  | 6.32033  | No change |
| NM_028868    | Cxxc1         | -0.0968457 | 1 | -0.41546  | 7.30718  | 5.20676  | No change |
| NM_028283    | Uaca          | -0.0961356 | 1 | -0.370757 | 5.55592  | 4.08567  | No change |
| NM_001159595 | Ints8         | -0.0959697 | 1 | -0.2831   | 11.0143  | 8.61307  | No change |
| NM_207541    | Zfp81         | -0.0956323 | 1 | -0.464018 | 6.24855  | 4.30172  | No change |
| NM_173741    | Wdr24         | -0.0953381 | 1 | -0.358821 | 8.59074  | 6.37061  | No change |
| NR_027957    | Ppp4r1l-ps    | -0.0951957 | 1 | -0.413076 | 4.1666   | 2.97388  | No change |
| NM_007983    | Faf1          | -0.0951066 | 1 | -0.339863 | 6.92366  | 5.20318  | No change |
| NM_001037865 | Col28a1       | -0.0939582 | 1 | -0.673151 | 1.4334   | 0.848593 | No change |
| NM_178577    | Tmem205       | -0.0932755 | 1 | -0.264822 | 77.5944  | 61.4567  | No change |
| NM_133240    | Acot8         | -0.0929161 | 1 | -0.512528 | 9.56688  | 6.36201  | No change |
| NM_029377    | Lin37         | -0.092908  | 1 | -0.506953 | 11.3129  | 7.55316  | No change |
| NM_001042499 | Rabl3         | -0.0925211 | 1 | -0.564217 | 4.37735  | 2.80489  | No change |
| NM_016813    | Nxf1          | -0.0924514 | 1 | -0.293711 | 19.5592  | 15.1817  | No change |
| NM_177771    | Kihl18        | -0.0918958 | 1 | -0.471108 | 2.93849  | 2.01268  | No change |
| NR_002888    | Vmn2r-ps14    | -0.0915571 | 1 | -0.274608 | 14.3027  | 11.2508  | No change |
| NM_145742    | Dhx35         | -0.0914584 | 1 | -0.614066 | 2.28751  | 1.41383  | No change |
| NR_027289    | Uckl1os       | -0.0909181 | 1 | -0.886145 | 7.7967   | 3.93375  | No change |
| NM_001081164 | Otud4         | -0.0906673 | 1 | -0.204035 | 18.6603  | 15.4188  | No change |
| NM_001205044 | Jarid2        | -0.0906491 | 1 | -0.323118 | 5.96139  | 4.53283  | No change |
| NM_145952    | Tbc1d12       | -0.090399  | 1 | -0.400718 | 4.6197   | 3.32603  | No change |
| NM_153404    | Liph          | -0.0902803 | 1 | -1.16625  | 1.12408  | 0.45615  | No change |
| NM_176840    | Osbp11        | -0.0899101 | 1 | -0.320865 | 7.56895  | 5.76424  | No change |
| NM_001037247 | Defb36        | -0.089741  | 1 | -0.519363 | 22.4864  | 14.8798  | No change |
| NM_013539    | Spsb2         | -0.089741  | 1 | -0.519363 | 8.9259   | 5.90647  | No change |
| NM_021305    | Sec61a2       | -0.0896421 | 1 | -0.287467 | 19.4752  | 15.1825  | No change |
| NM_013549    | Hist2h2aa1    | -0.0896411 | 1 | -0.232596 | 150.117  | 121.598  | No change |
| NM_008881    | Plxna1        | -0.0886013 | 1 | -0.251052 | 7.48888  | 5.98855  | No change |
| NM_025992    | Herc6         | -0.0885869 | 1 | -0.431243 | 3.04964  | 2.1487   | No change |
| NM_010432    | Hipk1         | -0.0885043 | 1 | -0.181353 | 25.1186  | 21.0851  | No change |
| NM_016750    | H2afz         | -0.0880932 | 1 | -0.216833 | 111.203  | 91.0703  | No change |
| NM_030703    | Cpn1          | -0.0878691 | 1 | -0.589752 | 4.39715  | 2.76582  | No change |
| NM_175930    | Rapgef5       | -0.0878691 | 1 | -0.589752 | 1.97525  | 1.24243  | No change |
| NM_009431    | Ctr9          | -0.0877343 | 1 | -0.275751 | 11.8316  | 9.29944  | No change |
| NM_026813    | Ppp6r2        | -0.0871883 | 1 | -0.347423 | 7.78581  | 5.81978  | No change |
| NM_007924    | Eil           | -0.0870754 | 1 | -0.406977 | 5.94141  | 4.25859  | No change |
| NM_172730    | C130022K22Rik | -0.0870009 | 1 | -0.492609 | 6.66387  | 4.4946   | No change |
| NM_001001176 | Taf9b         | -0.0862287 | 1 | -0.408667 | 6.98818  | 5.00286  | No change |
| NM_133805    | Cops8         | -0.0857059 | 1 | -0.352361 | 14.0672  | 10.4784  | No change |
| NM_181858    | Cd59b         | -0.0855843 | 1 | -1.2301   | 2.80173  | 1.08228  | No change |
| NM_011695    | Vdac2         | -0.0853129 | 1 | -0.191    | 94.1819  | 78.5295  | No change |
| NM_019687    | Slc22a4       | -0.0852427 | 1 | -1.64103  | 0.801777 | 0.222361 | No change |
| NM_177235    | Bend6         | -0.0852427 | 1 | -1.64103  | 0.790583 | 0.219257 | No change |
| NM_026107    | Zkscan6       | -0.084983  | 1 | -0.395557 | 8.41644  | 6.08134  | No change |
| NM_134034    | Smek2         | -0.0848673 | 1 | -0.205978 | 23.4538  | 19.3532  | No change |
| NM_134136    | Fbxo38        | -0.0847423 | 1 | -0.198784 | 30.6471  | 25.4158  | No change |
| NM_001081255 | Lrch3         | -0.0843045 | 1 | -0.277166 | 8.17285  | 6.41727  | No change |
| NM_144954    | Ppil2         | -0.084192  | 1 | -0.234068 | 36.0558  | 29.1753  | No change |
| NM_172254    | Dph3          | -0.0841886 | 1 | -0.29542  | 13.4487  | 10.4259  | No change |
| NM_009125    | Atxn2         | -0.0837513 | 1 | -0.363135 | 5.29866  | 3.91704  | No change |
| NM_178050    | Ati2          | -0.0836924 | 1 | -0.290886 | 12.4873  | 9.71127  | No change |
| NM_001177758 | Pfkfb3        | -0.083592  | 1 | -0.29461  | 8.72846  | 6.77041  | No change |
| NM_009186    | Tra2b         | -0.083232  | 1 | -0.215581 | 47.1366  | 38.636   | No change |
| NM_019571    | Tspan5        | -0.0830676 | 1 | -0.366367 | 7.2725   | 5.36395  | No change |
| NM_019652    | Asna1         | -0.0829749 | 1 | -0.265971 | 42.7168  | 33.8042  | No change |
| NM_028319    | Zfp518a       | -0.0827727 | 1 | -0.238041 | 10.7698  | 8.69049  | No change |
| NM_026002    | Mtdh          | -0.0826207 | 1 | -0.23245  | 21.4571  | 17.382   | No change |
| NM_001199203 | Spag9         | -0.0819069 | 1 | -0.210927 | 14.3044  | 11.7628  | No change |
| NM_026698    | Tmem129       | -0.0813924 | 1 | -0.340984 | 12.1435  | 9.11784  | No change |
| NM_013550    | Hist1h3a      | -0.0812354 | 1 | -0.707808 | 9.78833  | 5.64648  | No change |
| NM_153552    | Thoc1         | -0.080885  | 1 | -0.31095  | 8.91274  | 6.83458  | No change |
| NM_026068    | Med31         | -0.0804024 | 1 | -0.493406 | 9.7246   | 6.55456  | No change |
| NM_001164423 | Pqjc1         | -0.0803647 | 1 | -0.552902 | 2.69862  | 1.74293  | No change |
| NM_023200    | Ppp1r7        | -0.0802991 | 1 | -0.358214 | 6.54385  | 4.85419  | No change |
| NM_013625    | Pafah1b1      | -0.0802265 | 1 | -0.163496 | 45.2745  | 38.4785  | No change |
| NM_025910    | Mina          | -0.0798596 | 1 | -0.440519 | 6.77795  | 4.74375  | No change |
| NR_037971    | LOC100503197  | -0.0797818 | 1 | -0.504058 | 4.09333  | 2.73802  | No change |
| NM_213729    | Inca1         | -0.0794372 | 1 | -0.515962 | 8.354    | 5.54052  | No change |
| NM_023731    | Ccdc86        | -0.0793872 | 1 | -0.522455 | 3.2955   | 2.17548  | No change |
| NM_001005331 | Eif4g1        | -0.0791671 | 1 | -0.17409  | 35.7506  | 30.1613  | No change |
| NM_025570    | Mrpl20        | -0.0787167 | 1 | -0.348049 | 38.1477  | 28.5005  | No change |
| NM_010219    | Fkbp4         | -0.0786849 | 1 | -0.145437 | 178.269  | 153.421  | No change |
| NM_001001184 | Ccdc111       | -0.0785938 | 1 | -0.344135 | 6.86467  | 5.14278  | No change |

|              |               |            |   |           |          |           |           |
|--------------|---------------|------------|---|-----------|----------|-----------|-----------|
| NM_030074    | Zfp687        | -0.0781955 | 1 | -0.285346 | 9.07272  | 7.083     | No change |
| NM_138605    | Ppp1r3f       | -0.0780201 | 1 | -0.956535 | 0.858597 | 0.409864  | No change |
| NM_015751    | Abce1         | -0.077659  | 1 | -0.192152 | 34.9836  | 29.1457   | No change |
| NM_152825    | Usp45         | -0.0776203 | 1 | -0.344605 | 4.29272  | 3.21488   | No change |
| NM_001146707 | Nap1l1        | -0.0773894 | 1 | -0.257899 | 13.9421  | 11.0953   | No change |
| NM_001033150 | Plekhm2       | -0.0771602 | 1 | -0.263875 | 12.4277  | 9.84889   | No change |
| NM_024200    | Mfn1          | -0.0768377 | 1 | -0.327954 | 6.39865  | 4.84839   | No change |
| NM_025588    | Exoc2         | -0.0767687 | 1 | -0.234324 | 16.8083  | 13.5981   | No change |
| NM_013481    | Bop1          | -0.076636  | 1 | -0.271696 | 19.0558  | 15.0193   | No change |
| NM_019419    | Arl6ip1       | -0.0766094 | 1 | -0.180581 | 75.4708  | 63.3845   | No change |
| NM_001159536 | Adcy3         | -0.0765968 | 1 | -0.554939 | 1.83638  | 1.18421   | No change |
| NM_172463    | Sned1         | -0.076192  | 1 | -0.684511 | 1.23061  | 0.722082  | No change |
| NM_025358    | Ndufa9        | -0.0756166 | 1 | -0.227532 | 57.9896  | 47.1366   | No change |
| NM_029101    | Rrp7a         | -0.0751037 | 1 | -0.259691 | 26.926   | 21.401    | No change |
| NM_173426    | Fam110b       | -0.0748669 | 1 | -0.886145 | 1.64189  | 0.827665  | No change |
| NM_016881    | Pmm2          | -0.0747147 | 1 | -0.350235 | 13.459   | 10.0396   | No change |
| NM_001081340 | Setd2         | -0.0744695 | 1 | -0.179324 | 18.9632  | 15.9402   | No change |
| NM_029612    | Slamf9        | -0.0741553 | 1 | -0.577041 | 6.81713  | 4.32627   | No change |
| NM_001034906 | Trim43a       | -0.0737971 | 1 | -1.76061  | 0.797141 | 0.195509  | No change |
| NM_001081662 | C86695        | -0.0737971 | 1 | -1.76061  | 0.775597 | 0.190225  | No change |
| NM_018732    | Scn3a         | -0.0737971 | 1 | -1.76061  | 0.153091 | 0.0375476 | No change |
| NM_172610    | Mpped1        | -0.0737971 | 1 | -1.76061  | 0.449632 | 0.110278  | No change |
| NM_001145979 | Gtpbp2        | -0.0735969 | 1 | -0.284022 | 13.8863  | 10.8507   | No change |
| NM_001033172 | Rab11fip2     | -0.0732217 | 1 | -0.213107 | 16.9954  | 13.9541   | No change |
| NM_008861    | Pkd2          | -0.0730355 | 1 | -0.37553  | 3.89114  | 2.85125   | No change |
| NM_007672    | Cdr2          | -0.0727645 | 1 | -0.283905 | 16.0087  | 12.5101   | No change |
| NM_201352    | Gdpd5         | -0.0720744 | 1 | -1.05607  | 0.680785 | 0.300548  | No change |
| NR_038005    | 4933413J09Rik | -0.0720744 | 1 | -1.05607  | 0.720181 | 0.317941  | No change |
| NM_023248    | Sbds          | -0.0717645 | 1 | -0.235169 | 44.9069  | 36.3081   | No change |
| NM_001103166 | Pcbp2         | -0.0715823 | 1 | -0.265713 | 17.1281  | 13.5562   | No change |
| NM_013885    | Clic4         | -0.0715801 | 1 | -0.217508 | 20.3728  | 16.6759   | No change |
| NM_133735    | Ptcd1         | -0.07062   | 1 | -0.273168 | 13.5965  | 10.7051   | No change |
| NM_172536    | Zfp609        | -0.0696227 | 1 | -0.321018 | 3.36085  | 2.55889   | No change |
| NM_021499    | Wdr8          | -0.0688523 | 1 | -0.756862 | 2.74416  | 1.52556   | No change |
| NM_011091    | Pira4         | -0.0688289 | 1 | -1.30118  | 1.01574  | 0.371274  | No change |
| NM_011094    | Pira7         | -0.0688289 | 1 | -1.30118  | 1.00022  | 0.365602  | No change |
| NM_175452    | Gjc2          | -0.0688289 | 1 | -1.30118  | 0.986071 | 0.360429  | No change |
| NM_027807    | Cul5          | -0.0688045 | 1 | -0.210962 | 14.4523  | 11.8837   | No change |
| NM_010292    | Gck           | -0.0686118 | 1 | -0.608611 | 3.04228  | 1.88671   | No change |
| NM_145529    | Cstf3         | -0.0684504 | 1 | -0.459135 | 4.37414  | 3.02066   | No change |
| NM_001025427 | Hmga1         | -0.0683243 | 1 | -0.356324 | 13.2412  | 9.83438   | No change |
| NM_001166476 | Hmga1-rs1     | -0.0683243 | 1 | -0.356324 | 13.9037  | 10.3264   | No change |
| NM_008672    | Nap1l4        | -0.0683136 | 1 | -0.198189 | 45.4851  | 37.7351   | No change |
| NM_028411    | Tmem138       | -0.0682599 | 1 | -0.671406 | 6.07346  | 3.59737   | No change |
| NM_001164227 | Nrf1          | -0.0681074 | 1 | -0.52597  | 4.10321  | 2.7013    | No change |
| NM_028900    | Gcc1          | -0.0678932 | 1 | -0.287004 | 9.07793  | 7.07847   | No change |
| NM_144846    | Fam49b        | -0.0677497 | 1 | -0.29277  | 9.39021  | 7.29245   | No change |
| NM_008837    | Pick1         | -0.0652613 | 1 | -0.426714 | 7.08916  | 5.00949   | No change |
| NM_023211    | Usmg5         | -0.0644036 | 1 | -0.613127 | 19.4159  | 12.0003   | No change |
| NM_001177513 | Gm7102        | -0.0642875 | 1 | -0.679694 | 3.30441  | 1.94508   | No change |
| NM_007908    | Eef2k         | -0.0640336 | 1 | -0.543257 | 2.76146  | 1.79536   | No change |
| NM_021362    | Pappa         | -0.0640077 | 1 | -0.53498  | 0.796346 | 0.520838  | No change |
| NM_023858    | Mtmr2         | -0.063827  | 1 | -0.268657 | 14.1603  | 11.1839   | No change |
| NM_007688    | Cfl2          | -0.063592  | 1 | -0.217178 | 25.4291  | 20.8189   | No change |
| NR_024327    | Cnot2         | -0.0634903 | 1 | -0.217965 | 28.132   | 23.019    | No change |
| NM_172741    | 4931406P16Rik | -0.0629359 | 1 | -0.249275 | 8.83161  | 7.07032   | No change |
| NM_018786    | Prpf40b       | -0.0624072 | 1 | -0.352463 | 6.92738  | 5.15877   | No change |
| NM_018872    | Tmem131       | -0.0621118 | 1 | -0.234992 | 9.05753  | 7.32382   | No change |
| NM_025774    | Prkrip1       | -0.0618481 | 1 | -0.391569 | 10.3655  | 7.50897   | No change |
| NM_178934    | Slc2a12       | -0.0616879 | 1 | -0.725681 | 1.24121  | 0.706078  | No change |
| NM_010188    | Fcgr3         | -0.0614393 | 1 | -0.458724 | 8.91122  | 6.15503   | No change |
| NM_008044    | Fxn           | -0.0612021 | 1 | -0.809524 | 3.43691  | 1.83575   | No change |
| NM_001033318 | Cog7          | -0.0611217 | 1 | -0.260211 | 15.635   | 12.4215   | No change |
| NM_001033175 | Cln6          | -0.0611124 | 1 | -0.507634 | 4.53526  | 3.0249    | No change |
| NM_173185    | Csnk1g1       | -0.0611046 | 1 | -0.255734 | 6.55888  | 5.22716   | No change |
| NM_011959    | Orc5          | -0.0609646 | 1 | -0.322688 | 12.9299  | 9.83247   | No change |
| NM_001039239 | Zfp808        | -0.0606238 | 1 | -0.658735 | 1.81282  | 1.08355   | No change |
| NM_178076    | Mcf2l         | -0.0606238 | 1 | -0.658735 | 1.07465  | 0.642333  | No change |
| NR_038097    | Gm11696       | -0.0606238 | 1 | -0.658735 | 2.04164  | 1.22032   | No change |
| NM_011644    | Trpc2         | -0.0603102 | 1 | -0.564217 | 1.86408  | 1.19363   | No change |
| NM_026578    | Gar1          | -0.060251  | 1 | -0.688699 | 4.05765  | 2.37232   | No change |
| NM_207652    | Tsc22d1       | -0.0599852 | 1 | -0.156203 | 40.6492  | 34.7219   | No change |
| NM_001081362 | Trrap         | -0.0599514 | 1 | -0.189578 | 8.32897  | 6.95123   | No change |
| NM_177548    | Clasp1        | -0.0599387 | 1 | -0.237311 | 7.39625  | 5.97081   | No change |
| NM_001159963 | Fbxl5         | -0.0593958 | 1 | -0.174295 | 46.0877  | 38.8753   | No change |
| NM_025693    | Tmem41a       | -0.0593909 | 1 | -0.831697 | 2.61541  | 1.37348   | No change |

|              |               |            |   |           |          |          |           |
|--------------|---------------|------------|---|-----------|----------|----------|-----------|
| NM_025289    | Tbrg1         | -0.0591887 | 1 | -0.181094 | 74.8587  | 62.8458  | No change |
| NM_145621    | Camkv         | -0.0584374 | 1 | -0.960146 | 0.896742 | 0.42634  | No change |
| NR_015573    | 1700012D14Rik | -0.0584374 | 1 | -0.960146 | 4.32118  | 2.05443  | No change |
| NM_178035    | Fads6         | -0.0581844 | 1 | -0.856999 | 2.69997  | 1.39062  | No change |
| NM_023162    | Znrd1         | -0.0580791 | 1 | -0.379392 | 26.211   | 19.1512  | No change |
| NM_001145881 | Zfp212        | -0.057788  | 1 | -0.407261 | 5.67028  | 4.06214  | No change |
| NM_026327    | 1810048J11Rik | -0.057788  | 1 | -0.407261 | 3.46888  | 2.48507  | No change |
| NM_146092    | Taf6l         | -0.0574268 | 1 | -0.355259 | 9.42737  | 7.00638  | No change |
| NM_133865    | Dclre1b       | -0.0570364 | 1 | -0.508444 | 2.21041  | 1.47332  | No change |
| NM_011030    | P4ha1         | -0.0566548 | 1 | -0.422198 | 3.48206  | 2.4682   | No change |
| NM_080448    | Srgap3        | -0.0564079 | 1 | -0.373751 | 2.07055  | 1.51887  | No change |
| NM_133898    | N4bp211       | -0.0558974 | 1 | -0.566867 | 3.94902  | 2.52361  | No change |
| NM_025772    | Dtnbp1        | -0.0557695 | 1 | -0.257575 | 33.4633  | 26.6339  | No change |
| NM_025390    | Pop4          | -0.0555562 | 1 | -0.320653 | 21.3557  | 16.2624  | No change |
| NM_001136073 | Nfatc2        | -0.0550214 | 1 | -1.00814  | 0.377228 | 0.172704 | No change |
| NM_207105    | H2-Ab1        | -0.0549468 | 1 | -0.371572 | 15.4808  | 11.3734  | No change |
| NM_021565    | Midn          | -0.0548405 | 1 | -0.334383 | 6.31522  | 4.76283  | No change |
| NM_026436    | Tmem86a       | -0.0540553 | 1 | -0.458284 | 6.49845  | 4.48944  | No change |
| NM_144896    | Pet112l       | -0.0540553 | 1 | -0.458284 | 5.04496  | 3.4853   | No change |
| NM_133185    | Rogdi         | -0.0536453 | 1 | -0.249957 | 33.1943  | 26.5606  | No change |
| NM_030109    | Sf3b2         | -0.0535499 | 1 | -0.154271 | 52.5984  | 44.9887  | No change |
| NM_007632    | Ccmd3         | -0.0533066 | 1 | -0.261261 | 20.8832  | 16.5783  | No change |
| NM_173037    | Tmco7         | -0.0532665 | 1 | -0.646475 | 1.29617  | 0.781576 | No change |
| NM_011262    | Dpf2          | -0.0524059 | 1 | -0.26778  | 14.3531  | 11.3424  | No change |
| NM_001008232 | Asap3         | -0.0520112 | 1 | -0.709267 | 0.849    | 0.488724 | No change |
| NM_028768    | Armc8         | -0.0514209 | 1 | -0.249665 | 9.78833  | 7.83372  | No change |
| NM_012042    | Cul1          | -0.0510628 | 1 | -0.198999 | 25.3429  | 21.012   | No change |
| NM_008217    | Has3          | -0.0507487 | 1 | -0.471108 | 1.8272   | 1.25076  | No change |
| NM_153585    | Cnot10        | -0.0505519 | 1 | -0.211403 | 22.7793  | 18.7239  | No change |
| NM_024172    | Hspbp1        | -0.0504829 | 1 | -0.396146 | 10.4914  | 7.57472  | No change |
| NM_008951    | Psm4          | -0.049363  | 1 | -0.176906 | 85.3349  | 71.8483  | No change |
| NM_019794    | Dnaja2        | -0.0492747 | 1 | -0.160978 | 48.8022  | 41.5472  | No change |
| NM_130895    | Adarb1        | -0.0491113 | 1 | -0.415074 | 2.13671  | 1.52211  | No change |
| NM_001025093 | Atf2          | -0.0489631 | 1 | -0.179717 | 23.796   | 19.996   | No change |
| NM_176958    | Hif1an        | -0.0486649 | 1 | -0.251705 | 6.98055  | 5.57859  | No change |
| NR_027388    | 1700096K18Rik | -0.0486313 | 1 | -0.653484 | 3.79968  | 2.27908  | No change |
| NM_016682    | Uba2          | -0.0485214 | 1 | -0.160439 | 54.672   | 46.5617  | No change |
| NM_009562    | Zfp62         | -0.048103  | 1 | -0.201979 | 18.8474  | 15.594   | No change |
| NM_001005507 | Smg7          | -0.0479969 | 1 | -0.148012 | 29.7137  | 25.5254  | No change |
| NM_001039084 | Mrpl1         | -0.0478448 | 1 | -0.46652  | 6.88543  | 4.72847  | No change |
| NM_001033210 | Pls1          | -0.0478401 | 1 | -0.721086 | 1.22533  | 0.699074 | No change |
| NM_172726    | E130309D02Rik | -0.0475617 | 1 | -0.442539 | 5.17566  | 3.61559  | No change |
| NM_001114140 | Tcf20         | -0.0474014 | 1 | -0.124784 | 38.7952  | 33.869   | No change |
| NM_008455    | Kikb1         | -0.0472706 | 1 | -0.524879 | 3.45491  | 2.27537  | No change |
| NM_026149    | Nudcd1        | -0.0472501 | 1 | -0.247743 | 12.8387  | 10.2886  | No change |
| NM_001033294 | Ddx31         | -0.0471326 | 1 | -0.584764 | 2.05226  | 1.29431  | No change |
| NM_010500    | Ier5          | -0.0471326 | 1 | -0.584764 | 2.08866  | 1.31727  | No change |
| NM_133748    | Insig2        | -0.0468516 | 1 | -0.268516 | 14.969   | 11.8227  | No change |
| NM_028072    | Sulf2         | -0.0466991 | 1 | -0.315911 | 5.48643  | 4.1916   | No change |
| NM_001081217 | Zfp174        | -0.0466786 | 1 | -0.471108 | 1.78279  | 1.22028  | No change |
| NM_010418    | Herc2         | -0.0466295 | 1 | -0.14329  | 11.9849  | 10.3294  | No change |
| NM_011299    | Rps6ka2       | -0.0466112 | 1 | -0.356031 | 3.55813  | 2.64269  | No change |
| NM_008845    | Pip4k2a       | -0.0466079 | 1 | -0.572646 | 2.04802  | 1.30303  | No change |
| NM_013827    | Mtf2          | -0.0463679 | 1 | -0.259314 | 9.70343  | 7.71337  | No change |
| NM_025676    | Mcm8          | -0.0463318 | 1 | -0.551278 | 2.4002   | 1.5509   | No change |
| NM_016688    | Pdcd7         | -0.0455782 | 1 | -0.428842 | 5.22342  | 3.68459  | No change |
| NM_133649    | Slc12a6       | -0.0450473 | 1 | -0.196014 | 11.5962  | 9.63433  | No change |
| NM_001081163 | Chsy1         | -0.044368  | 1 | -0.617656 | 1.45194  | 0.893949 | No change |
| NM_027275    | Ptcd3         | -0.0443568 | 1 | -0.215624 | 23.1236  | 18.9506  | No change |
| NM_178212_2  | Hist2h2aa2    | -0.0442784 | 1 | -0.249736 | 107.288  | 85.8569  | No change |
| NM_146151    | Tesk2         | -0.0442374 | 1 | -0.252928 | 13.4927  | 10.7734  | No change |
| NM_025580    | Pnkd          | -0.043938  | 1 | -0.394146 | 23.9261  | 17.2977  | No change |
| NM_012050    | Omd           | -0.0438614 | 1 | -0.661079 | 3.02494  | 1.804    | No change |
| NM_001112700 | Cyth1         | -0.043461  | 1 | -0.313289 | 7.99938  | 6.1226   | No change |
| NM_153501    | Pank2         | -0.043203  | 1 | -0.253716 | 9.42635  | 7.5224   | No change |
| NM_001166402 | Tnfaip3       | -0.0430796 | 1 | -0.602352 | 1.46265  | 0.910633 | No change |
| NM_027338    | Vps36         | -0.0427657 | 1 | -0.6935   | 3.76571  | 2.19252  | No change |
| NM_001163441 | Mov10         | -0.0424924 | 1 | -0.471108 | 2.99776  | 2.05176  | No change |
| NM_019993    | Aldh9a1       | -0.0423293 | 1 | -0.330298 | 7.77373  | 5.87911  | No change |
| NM_199018    | Stard8        | -0.0421886 | 1 | -0.457561 | 2.21872  | 1.53332  | No change |
| NM_011936    | Fto           | -0.0421698 | 1 | -0.241659 | 12.5361  | 10.0887  | No change |
| NM_011405    | Slc7a7        | -0.0417353 | 1 | -0.543753 | 3.39592  | 2.20604  | No change |
| NM_009795    | Capns1        | -0.0417329 | 1 | -0.141609 | 120.379  | 103.871  | No change |
| NM_175111    | Hspbp1        | -0.0417144 | 1 | -0.575805 | 1.49796  | 0.950771 | No change |
| NM_019879    | Suclg1        | -0.0412911 | 1 | -0.283801 | 21.9793  | 17.1741  | No change |
| NM_008013    | Fgl2          | -0.0410728 | 1 | -0.221046 | 14.4415  | 11.7906  | No change |

|              |               |            |   |            |          |           |           |
|--------------|---------------|------------|---|------------|----------|-----------|-----------|
| NM_019828    | Trpc4ap       | -0.0410285 | 1 | -0.168545  | 33.5729  | 28.4314   | No change |
| NM_001039045 | Pigc          | -0.0408297 | 1 | -0.301183  | 8.11813  | 6.26643   | No change |
| NM_194051    | Rtn4          | -0.0407211 | 1 | -0.220564  | 9.80566  | 8.00835   | No change |
| NM_080464    | Ppp1r3a       | -0.0406494 | 1 | -0.855772  | 0.450263 | 0.231909  | No change |
| NM_018784    | St3gal6       | -0.0402789 | 1 | -0.505055  | 5.60345  | 3.74287   | No change |
| NM_011087    | Pira1         | -0.0396985 | 1 | -1.38091   | 0.607787 | 0.208695  | No change |
| NM_001081058 | Cdk13         | -0.0395748 | 1 | -0.154078  | 18.5723  | 15.8871   | No change |
| NM_133744    | Ccdc71        | -0.0394909 | 1 | -0.284542  | 9.6422   | 7.5302    | No change |
| NM_001013777 | Zfp488        | -0.0394445 | 1 | -1.12318   | 0.518525 | 0.216992  | No change |
| NM_001034859 | Gm4841        | -0.0394445 | 1 | -1.12318   | 0.785826 | 0.328852  | No change |
| NM_024229    | Pcyt2         | -0.0393979 | 1 | -0.238782  | 24.3071  | 19.6007   | No change |
| NM_146028    | Stac2         | -0.0393706 | 1 | -0.886145  | 0.982878 | 0.494461  | No change |
| NM_011767    | Zfr           | -0.0393426 | 1 | -0.170458  | 21.9373  | 18.5529   | No change |
| NM_133763    | Dnttip1       | -0.0393385 | 1 | -0.623111  | 4.70595  | 2.88549   | No change |
| NM_001029979 | Safb2         | -0.0383967 | 1 | -0.243623  | 12.8864  | 10.3562   | No change |
| NM_001122765 | Sirt2         | -0.0382886 | 1 | -0.31228   | 13.3169  | 10.1994   | No change |
| NM_001024474 | Diras2        | -0.0380723 | 1 | -0.704307  | 1.0579   | 0.610917  | No change |
| NM_026666    | Ubn1          | -0.0376935 | 1 | -0.197483  | 10.6132  | 8.80844   | No change |
| NM_025708    | Tmem186       | -0.0374919 | 1 | -0.290535  | 9.78316  | 7.60815   | No change |
| NM_178065    | 1110018G07Rik | -0.0374046 | 1 | -0.148889  | 25.4887  | 21.8822   | No change |
| NM_030203    | Tspy14        | -0.0372444 | 1 | -0.253622  | 9.75701  | 7.78656   | No change |
| NM_001033185 | 1700084C01Rik | -0.0367063 | 1 | -1.81214   | 0.871162 | 0.199419  | No change |
| NM_008319    | Icam5         | -0.0367063 | 1 | -1.81214   | 0.420682 | 0.0962991 | No change |
| NM_009858    | Cd8b1         | -0.0367063 | 1 | -1.81214   | 0.885927 | 0.202799  | No change |
| NM_173415    | Nyx           | -0.0367063 | 1 | -1.81214   | 0.346444 | 0.0793051 | No change |
| NM_177328    | Grm7          | -0.0367063 | 1 | -1.81214   | 0.300041 | 0.0686831 | No change |
| NM_001166416 | Med23         | -0.0365927 | 1 | -0.280329  | 6.11539  | 4.78994   | No change |
| NR_028304    | C4bp-ps1      | -0.0360282 | 1 | -0.964148  | 3.41995  | 1.61863   | No change |
| NM_172605    | Tdrd3         | -0.0358018 | 1 | -0.293803  | 9.97812  | 7.7419    | No change |
| NM_028785    | Dock8         | -0.0355596 | 1 | -0.481524  | 1.23145  | 0.836489  | No change |
| NM_019580    | Gde1          | -0.0355374 | 1 | -0.182451  | 52.7369  | 44.2296   | No change |
| NM_001010836 | Ppp1r13l      | -0.035503  | 1 | -0.764839  | 1.2469   | 0.688092  | No change |
| NM_010483    | Htr5b         | -0.035503  | 1 | -0.764839  | 1.94751  | 1.07472   | No change |
| NM_174847    | C2cd2         | -0.0342196 | 1 | -0.360076  | 2.64697  | 1.96013   | No change |
| NM_023464    | Ssna1         | -0.034218  | 1 | -0.283905  | 33.3945  | 26.0907   | No change |
| NM_029090    | Nat15         | -0.0339554 | 1 | -0.279942  | 12.243   | 9.59187   | No change |
| NM_019973    | Son           | -0.0335176 | 1 | -0.0983058 | 55.3163  | 49.1876   | No change |
| NM_001171801 | Gm11818       | -0.032896  | 1 | -0.529211  | 5.2467   | 3.44367   | No change |
| NM_178279    | Pxk           | -0.0328751 | 1 | -0.326718  | 7.43555  | 5.63711   | No change |
| NM_026911    | Spcs1         | -0.0328145 | 1 | -0.139594  | 149.57   | 129.238   | No change |
| NM_133795    | Ttc1          | -0.0326656 | 1 | -0.252213  | 25.7942  | 20.6048   | No change |
| NM_001081128 | Mtr           | -0.0322951 | 1 | -0.208966  | 13.7444  | 11.316    | No change |
| NM_007434    | Akt2          | -0.0322083 | 1 | -0.250248  | 12.8124  | 10.2488   | No change |
| NM_026156    | Xab2          | -0.0321038 | 1 | -0.19049   | 26.2071  | 21.8565   | No change |
| NM_008079    | Galc          | -0.03198   | 1 | -0.280621  | 7.8461   | 6.1441    | No change |
| NM_025579    | Taf12         | -0.0317242 | 1 | -0.388076  | 10.8411  | 7.87042   | No change |
| NM_013651    | Sf3a2         | -0.0316964 | 1 | -0.547976  | 4.37142  | 2.83047   | No change |
| NM_020616    | D930014E17Rik | -0.0313493 | 1 | -0.558571  | 7.23431  | 4.64834   | No change |
| NM_010382    | H2-Eb1        | -0.0311332 | 1 | -0.288904  | 16.2436  | 12.6462   | No change |
| NM_173019    | Pfkfb4        | -0.0310283 | 1 | -0.261092  | 10.0361  | 7.96728   | No change |
| NM_011273    | Xpr1          | -0.030899  | 1 | -0.168694  | 11.9237  | 10.0963   | No change |
| NM_025277    | Gng10         | -0.0307171 | 1 | -0.410672  | 11.574   | 8.26878   | No change |
| NM_177715    | Kctd12        | -0.0301674 | 1 | -0.314645  | 3.70499  | 2.83276   | No change |
| NM_134149    | Al837181      | -0.0297884 | 1 | -0.333604  | 12.928   | 9.75344   | No change |
| NM_021350    | Chml          | -0.0297341 | 1 | -0.311451  | 3.73762  | 2.86413   | No change |
| NM_177150    | Cenpt         | -0.0296362 | 1 | -0.514176  | 4.65408  | 3.08778   | No change |
| NM_026331    | Slc25a37      | -0.0293104 | 1 | -0.335948  | 4.67187  | 3.51883   | No change |
| NM_001162870 | Spast         | -0.0288007 | 1 | -0.242807  | 8.25155  | 6.63486   | No change |
| NR_028507    | Prr3          | -0.0282219 | 1 | -0.378205  | 7.80762  | 5.7077    | No change |
| NM_013919    | Usp21         | -0.0281946 | 1 | -0.396561  | 6.29505  | 4.54248   | No change |
| NM_001145807 | Fam5c         | -0.0279755 | 1 | -0.803683  | 1.26255  | 0.676292  | No change |
| NM_009396    | Tnfaip2       | -0.0273823 | 1 | -0.318404  | 6.01272  | 4.58497   | No change |
| NM_139059    | Csnk1d        | -0.0272655 | 1 | -0.146681  | 32.7099  | 28.1243   | No change |
| NM_028546    | 1700066M21Rik | -0.0268828 | 1 | -0.228414  | 14.4624  | 11.7463   | No change |
| NM_007951    | Erh           | -0.0261437 | 1 | -0.255502  | 41.7128  | 33.2431   | No change |
| NM_001081029 | 4930420K17Rik | -0.0261277 | 1 | -0.481996  | 9.3112   | 6.32167   | No change |
| NM_010733    | Lrrn3         | -0.0259043 | 1 | -0.586585  | 1.96935  | 1.23972   | No change |
| NM_026721    | Slc39a13      | -0.0256977 | 1 | -0.295789  | 10.8847  | 8.43299   | No change |
| NM_026027    | Pfdn1         | -0.0253125 | 1 | -0.214199  | 45.7501  | 37.5286   | No change |
| NM_001037926 | Gm13051       | -0.0247007 | 1 | -0.827252  | 1.15622  | 0.608183  | No change |
| NM_011592    | Timm44        | -0.0237941 | 1 | -0.228452  | 23.6612  | 19.2168   | No change |
| NM_008721    | Npdc1         | -0.0237154 | 1 | -0.744126  | 2.69688  | 1.51088   | No change |
| NM_009702    | Aqr           | -0.0235971 | 1 | -0.183549  | 13.9243  | 11.6688   | No change |
| NM_145378    | Pla2g4b       | -0.0234633 | 1 | -0.69906   | 1.15613  | 0.6699    | No change |
| NM_153516    | Bcl2l13       | -0.0231675 | 1 | -0.259035  | 4.62408  | 3.67601   | No change |
| NM_022011    | Gtf2h2        | -0.0211325 | 1 | -0.343448  | 10.3294  | 7.73845   | No change |

|              |               |             |   |            |          |           |           |
|--------------|---------------|-------------|---|------------|----------|-----------|-----------|
| NM_013752    | Nbn           | -0.0209174  | 1 | -0.336081  | 7.38616  | 5.56229   | No change |
| NM_172429    | Smndc1        | -0.0204875  | 1 | -0.287959  | 11.8396  | 9.22303   | No change |
| NM_053195    | Slc24a3       | -0.0204542  | 1 | -0.508582  | 2.36247  | 1.57344   | No change |
| NM_013818    | Gtpbp1        | -0.020319   | 1 | -0.274842  | 8.14247  | 6.40161   | No change |
| NM_001029983 | Man1b1        | -0.0201451  | 1 | -0.189926  | 16.1661  | 13.4872   | No change |
| NM_172892    | Slc13a4       | -0.0195261  | 1 | -0.886145  | 0.834037 | 0.419095  | No change |
| NM_016737    | Stip1         | -0.0192085  | 1 | -0.154296  | 43.4579  | 37.1674   | No change |
| NM_001048145 | Syce1l        | -0.0191639  | 1 | -1.58658   | 2.08163  | 0.600402  | No change |
| NM_008599    | Cxcl9         | -0.0191639  | 1 | -1.58658   | 0.599767 | 0.17299   | No change |
| NM_001033352 | Klhl21        | -0.0186828  | 1 | -0.34705   | 4.36587  | 3.26239   | No change |
| NM_009361    | Tfdp1         | -0.0186828  | 1 | -0.34705   | 10.003   | 7.47471   | No change |
| NM_027946    | Dcaf7         | -0.0185802  | 1 | -0.13227   | 23.0209  | 19.9926   | No change |
| NM_029274    | Wbp7          | -0.0182369  | 1 | -0.206054  | 5.87573  | 4.84719   | No change |
| NM_023799    | Mgea5         | -0.0181828  | 1 | -0.110914  | 41.1736  | 36.2921   | No change |
| NM_198026    | Iqcc          | -0.0180769  | 1 | -0.288974  | 11.4528  | 8.91522   | No change |
| NM_145505    | Fam160b1      | -0.0180489  | 1 | -0.240718  | 6.35035  | 5.11335   | No change |
| NM_001081132 | Upf2          | -0.0176358  | 1 | -0.191615  | 11.1396  | 9.2826    | No change |
| NM_175565    | Cdv3          | -0.0176114  | 1 | -0.140377  | 28.2053  | 24.3573   | No change |
| NM_030262    | Pofut2        | -0.0173587  | 1 | -0.27041   | 12.5944  | 9.93232   | No change |
| NM_172554    | Zdhhc17       | -0.0165799  | 1 | -0.294065  | 5.14882  | 3.99365   | No change |
| NM_001134829 | Lpgat1        | -0.0163618  | 1 | -0.131402  | 18.2914  | 15.8948   | No change |
| NM_172149    | Bnip1         | -0.0162852  | 1 | -0.465813  | 8.67147  | 5.95501   | No change |
| NM_009230    | Soat1         | -0.016235   | 1 | -0.15312   | 19.2111  | 16.4437   | No change |
| NM_011568    | Thoc4         | -0.0159432  | 1 | -0.240576  | 31.0294  | 24.9873   | No change |
| NM_054087    | Slc19a2       | -0.0159086  | 1 | -0.298235  | 6.38934  | 4.94133   | No change |
| NM_010072    | Dpm1          | -0.0157715  | 1 | -0.183826  | 26.8681  | 22.511    | No change |
| NM_008710    | Nnt           | -0.0156561  | 1 | -0.15987   | 17.9897  | 15.326    | No change |
| NM_008549    | Man2a1        | -0.0155971  | 1 | -0.194355  | 8.98968  | 7.47675   | No change |
| NM_027445    | Rnf167        | -0.0153128  | 1 | -0.265359  | 18.7494  | 14.8387   | No change |
| NM_173363    | Eif5          | -0.0151156  | 1 | -0.0902187 | 75.3865  | 67.4104   | No change |
| NM_178648    | Ubxn8         | -0.0149411  | 1 | -0.245291  | 11.8753  | 9.53135   | No change |
| NM_016882    | Sart1         | -0.0144345  | 1 | -0.205462  | 9.43202  | 7.78405   | No change |
| NM_001025378 | Orc2          | -0.0143305  | 1 | -0.238205  | 22.2649  | 17.9591   | No change |
| NM_172788    | Sh3rf3        | -0.0142986  | 1 | -0.595096  | 1.01266  | 0.63334   | No change |
| NM_001166391 | F13a1         | -0.0142266  | 1 | -0.406619  | 3.14649  | 2.25395   | No change |
| NM_026873    | Ptcd2         | -0.0141338  | 1 | -0.298199  | 13.3561  | 10.3293   | No change |
| NM_026964    | Ccdc124       | -0.0140105  | 1 | -0.29533   | 25.016   | 19.3859   | No change |
| NM_001024927 | Pitpnm3       | -0.0139465  | 1 | -1.25538   | 0.31365  | 0.118467  | No change |
| NM_011041    | Pax9          | -0.0139465  | 1 | -1.25538   | 0.812272 | 0.306799  | No change |
| NM_001081750 | Zfp664        | -0.0138383  | 1 | -0.179722  | 15.4835  | 13.0097   | No change |
| NM_148928    | Gtf3c5        | -0.0133401  | 1 | -0.372973  | 5.12632  | 3.76085   | No change |
| NM_170757    | A630007B06Rik | -0.0132891  | 1 | -0.152106  | 32.4424  | 27.7884   | No change |
| NM_130454    | Recql5        | -0.0132313  | 1 | -0.239621  | 8.67228  | 6.98818   | No change |
| NM_001109913 | Hnrnpm        | -0.0131496  | 1 | -0.140303  | 43.9224  | 37.9318   | No change |
| NM_001003912 | Arhgef11      | -0.0129732  | 1 | -0.281228  | 4.45537  | 3.48699   | No change |
| NM_029169    | Rbm6          | -0.0129561  | 1 | -0.142159  | 25.7766  | 22.2322   | No change |
| NM_133216    | Xpnp1         | -0.0129469  | 1 | -0.154316  | 35.8313  | 30.6439   | No change |
| NM_028291    | Pan3          | -0.0128174  | 1 | -0.14197   | 22.227   | 19.1732   | No change |
| NM_025481    | Smurf2        | -0.0127866  | 1 | -0.144517  | 18.5639  | 15.985    | No change |
| NM_025334    | Txndc12       | -0.0126809  | 1 | -0.326718  | 14.4966  | 10.9884   | No change |
| NM_177003    | 9630033F20Rik | -0.0125231  | 1 | -0.362294  | 4.12091  | 3.04615   | No change |
| NM_133788    | Icmt          | -0.0117483  | 1 | -0.148308  | 18.6761  | 16.0392   | No change |
| NM_015735    | Ddb1          | -0.0115557  | 1 | -0.116343  | 37.2153  | 32.6793   | No change |
| NM_146238    | Gemin8        | -0.0113496  | 1 | -0.657876  | 2.61918  | 1.56407   | No change |
| NM_027558    | Pgrmc2        | -0.0105026  | 1 | -0.212757  | 14.277   | 11.7224   | No change |
| NM_001163574 | Tjp1          | -0.00935905 | 1 | -0.132244  | 16.4753  | 14.3081   | No change |
| NM_001163449 | Mapk8ip3      | -0.00896248 | 1 | -0.191     | 9.54958  | 7.96085   | No change |
| NM_001083121 | Enah          | -0.00890351 | 1 | -0.157138  | 22.5048  | 19.2088   | No change |
| NM_175557    | Zfp384        | -0.0088451  | 1 | -0.304414  | 6.7621   | 5.20666   | No change |
| NM_025748    | Adat2         | -0.00857255 | 1 | -0.616959  | 3.69329  | 2.2728    | No change |
| NM_028083    | Chaf1b        | -0.00812475 | 1 | -0.6935    | 2.25874  | 1.31348   | No change |
| NM_001161411 | Ttc15         | -0.00773429 | 1 | -0.250137  | 10.4515  | 8.3599    | No change |
| NM_001080748 | Gtf2i         | -0.00766903 | 1 | -0.108338  | 38.7416  | 34.2091   | No change |
| NM_019667    | Stam2         | -0.00763992 | 1 | -0.160352  | 17.9471  | 15.2843   | No change |
| NM_178347    | Cdc23         | -0.00709587 | 1 | -0.188329  | 12.8293  | 10.7148   | No change |
| NM_175419    | Actr5         | -0.0070445  | 1 | -0.450497  | 4.04612  | 2.80882   | No change |
| NM_001034900 | Zfp345        | -0.00685515 | 1 | -1.88615   | 0.386324 | 0.0795909 | No change |
| NM_001164518 | Igln5         | -0.00685515 | 1 | -1.88615   | 0.407244 | 0.0839006 | No change |
| NM_031877    | Wasf1         | -0.00685515 | 1 | -1.88615   | 0.409958 | 0.08446   | No change |
| NM_138951    | Ttc36         | -0.00685515 | 1 | -1.88615   | 1.36832  | 0.281902  | No change |
| NM_177060    | Rnf222        | -0.00685515 | 1 | -1.88615   | 0.38704  | 0.0797382 | No change |
| NM_178385    | Tbcc          | -0.00662114 | 1 | -0.289357  | 12.2142  | 9.50461   | No change |
| NM_181344    | C1rl          | -0.00647943 | 1 | -1.52358   | 0.625153 | 0.190807  | No change |
| NM_026876    | 1190005F20Rik | -0.0061091  | 1 | -0.323551  | 6.77316  | 5.14524   | No change |
| NM_029654    | Atg2b         | -0.00605188 | 1 | -0.122983  | 12.256   | 10.7125   | No change |
| NM_172685    | Slc25a24      | -0.0058874  | 1 | -0.46557   | 2.65752  | 1.82501   | No change |

|              |               |              |   |            |           |            |           |
|--------------|---------------|--------------|---|------------|-----------|------------|-----------|
| NM_028792    | Josd1         | -0.00567938  | 1 | -0.215647  | 11.7455   | 9.62431    | No change |
| NM_001081169 | Aspg          | -0.00562386  | 1 | -0.824745  | 1.14794   | 0.60439    | No change |
| NM_001197322 | Foxp1         | -0.00553915  | 1 | -0.248715  | 4.5292    | 3.62635    | No change |
| NM_028906    | Dpp8          | -0.00544719  | 1 | -0.126063  | 24.6207   | 21.474     | No change |
| NM_008389    | Ipp           | -0.00535943  | 1 | -0.37013   | 6.54811   | 4.81318    | No change |
| NM_001170540 | Btf3          | -0.00487485  | 1 | -0.147515  | 95.1214   | 81.735     | No change |
| NM_001163300 | Safb          | -0.0042637   | 1 | -0.250675  | 9.19605   | 7.35277    | No change |
| NM_001083912 | Plekhg2       | -0.00389149  | 1 | -0.353076  | 2.98152   | 2.21814    | No change |
| NM_133360    | Acaca         | -0.00387559  | 1 | -0.157447  | 8.09432   | 6.90726    | No change |
| NM_028014    | 2310067B10Rik | -0.00364819  | 1 | -0.264657  | 5.24511   | 4.15284    | No change |
| NM_172645    | Al848100      | -0.00329273  | 1 | -0.0687795 | 61.8707   | 56.1536    | No change |
| NM_177242    | Pptc7         | -0.0030705   | 1 | -0.214471  | 8.52458   | 6.99071    | No change |
| NM_008942    | Npepps        | -0.00224045  | 1 | -0.177028  | 13.7197   | 11.549     | No change |
| NM_001039562 | Ankrd37       | -0.00200617  | 1 | -0.705573  | 4.54854   | 2.62069    | No change |
| NM_001029985 | Kcp           | -0.00176549  | 1 | -2.00162   | 0.171096  | 0.0293744  | No change |
| NM_001033325 | A630095E13Rik | -0.00176549  | 1 | -2.00162   | 1.35107   | 0.231958   | No change |
| NM_001081338 | L3mbtl1       | -0.00176549  | 1 | -2.00162   | 0.306006  | 0.0525364  | No change |
| NM_007972    | F10           | -0.00176549  | 1 | -2.00162   | 0.409356  | 0.07028    | No change |
| NM_023893    | Ng23          | -0.00176549  | 1 | -2.00162   | 0.892546  | 0.153236   | No change |
| NM_153288    | Npb           | -0.00176549  | 1 | -2.00162   | 1.52334   | 0.261534   | No change |
| NR_027924    | 2010204K13Rik | -0.00176549  | 1 | -2.00162   | 1.01249   | 0.173828   | No change |
| NM_001146711 | 2310014H01Rik | -0.00148872  | 1 | -0.319944  | 6.70827   | 5.10872    | No change |
| NM_013507    | Eif4g2        | -0.00148655  | 1 | -0.0482278 | 98.0281   | 90.2475    | No change |
| NM_027007    | Zfp397        | -0.00125087  | 1 | -0.155581  | 13.1865   | 11.2672    | No change |
| NM_011284    | Rpa2          | -0.00119339  | 1 | -0.440734  | 5.47532   | 3.82724    | No change |
| NM_133966    | Taf5l         | -0.00105734  | 1 | -0.226221  | 12.046    | 9.79759    | No change |
| NM_001033321 | Tmem231       | -0.000690491 | 1 | -0.274787  | 8.25597   | 6.49028    | No change |
| NM_026175    | Sf3a1         | -0.000324169 | 1 | -0.248715  | 5.855     | 4.68773    | No change |
| NM_001037725 | Fam117b       | -0.000174561 | 1 | -0.182035  | 9.499     | 7.96812    | No change |
| NM_001080814 | Fat3          | -0.000144434 | 1 | -0.282074  | 1.22268   | 0.95628    | No change |
| NM_001001130 | Zfp85-rs1     | 0            | 1 | -0.0116761 | 3.3621    | 3.17201    | No change |
| NM_001001160 | Fbxo41        | 0            | 1 | -1.14918   | 0.116828  | 0.0437616  | No change |
| NM_001001182 | Baz2b         | 0            | 1 | 0.0659136  | 12.55     | 12.5049    | No change |
| NM_001001183 | Tmem204       | 0            | 1 | -0.0521551 | 5.36702   | 4.92327    | No change |
| NM_001001319 | Pram14        | 0            | 1 | 0.698817   | 0.0290508 | 0.0598507  | No change |
| NM_001001320 | Tbx10         | 0            | 1 | 0.698817   | 0.0391974 | 0.0807547  | No change |
| NM_001001321 | Slc35d2       | 0            | 1 | -0.185705  | 0.949245  | 0.788565   | No change |
| NM_001001322 | Adamts13      | 0            | 1 | 1.69882    | 0.0608672 | 0.219448   | No change |
| NM_001001326 | St5           | 0            | 1 | 0.00775899 | 11.0723   | 10.5957    | No change |
| NM_001001332 | BC117090      | 0            | 1 | 0.113855   | 0         | 0          | No change |
| NM_001001335 | Plekha8       | 0            | 1 | -0.0145095 | 8.76026   | 8.25482    | No change |
| NM_001001451 | Tas2r138      | 0            | 1 | 0.113855   | 0         | 0          | No change |
| NM_001001452 | Tas2r143      | 0            | 1 | -0.471108  | 0.158034  | 0.0813957  | No change |
| NM_001001453 | Tas2r144      | 0            | 1 | 1.11385    | 0         | 0.0747823  | No change |
| NM_001001489 | BC021785      | 0            | 1 | -2.47111   | 0.146908  | 0          | No change |
| NM_001001495 | Trip3         | 0            | 1 | 0.698817   | 0.0554733 | 0.0952388  | No change |
| NM_001001559 | Dub2a         | 0            | 1 | 0.113855   | 0         | 0          | No change |
| NM_001001565 | Chpf          | 0            | 1 | 0.0507761  | 8.03569   | 7.92253    | No change |
| NM_001001796 | Prrxl1        | 0            | 1 | 0.113855   | 0         | 0          | No change |
| NM_001001798 | Atp11c        | 0            | 1 | 0.119524   | 5.94654   | 6.14971    | No change |
| NM_001001803 | Spink7        | 0            | 1 | 0.113855   | 0         | 0          | No change |
| NM_001001805 | Olf576        | 0            | 1 | 0.113855   | 0         | 0          | No change |
| NM_001001807 | Olf279        | 0            | 1 | -1.47111   | 0.149395  | 0          | No change |
| NM_001001808 | Olf221        | 0            | 1 | -1.20807   | 0.297833  | 0.0766998  | No change |
| NM_001001809 | Olf218        | 0            | 1 | 0.113855   | 0         | 0          | No change |
| NM_001001810 | Olf1206       | 0            | 1 | 0.113855   | 0         | 0          | No change |
| NM_001001885 | Tmem151a      | 0            | 1 | -0.623111  | 0.0706646 | 0.0363959  | No change |
| NM_001001979 | Megf10        | 0            | 1 | -1.47111   | 0.0463754 | 0.00955429 | No change |
| NM_001001982 | A430105I19Rik | 0            | 1 | 0.0847085  | 1.46302   | 1.47662    | No change |
| NM_001001985 | Nat8l         | 0            | 1 | -1.34558   | 0.224162  | 0.07697    | No change |
| NM_001002005 | Panx2         | 0            | 1 | 0.229332   | 0.960014  | 1.07308    | No change |
| NM_001002842 | Pram1         | 0            | 1 | -0.486538  | 1.40732   | 0.945447   | No change |
| NM_001002846 | Fbxl12        | 0            | 1 | 0.210473   | 7.78881   | 8.58143    | No change |
| NM_001002896 | Bfsp2         | 0            | 1 | 1.69882    | 0         | 0.0914535  | No change |
| NM_001002897 | Atg9b         | 0            | 1 | -1.20807   | 0.250052  | 0.0919925  | No change |
| NM_001002900 | Higd1c        | 0            | 1 | 0.113855   | 0         | 0          | No change |
| NM_001002929 | Nup85         | 0            | 1 | 0.00560192 | 5.32623   | 5.08755    | No change |
| NM_001003393 | Igf13         | 0            | 1 | 0.113855   | 0         | 0          | No change |
| NM_001003405 | Try5          | 0            | 1 | -3.20807   | 0.783067  | 0          | No change |
| NM_001003664 | Gm5409        | 0            | 1 | 0.113855   | 0         | 0          | No change |
| NM_001003666 | Zfp457        | 0            | 1 | 0.721537   | 0.658723  | 1.05176    | No change |
| NM_001003667 | Krt77         | 0            | 1 | -1.88615   | 0.121628  | 0          | No change |
| NM_001003668 | Krt83         | 0            | 1 | 1.92121    | 0.038167  | 0.235896   | No change |
| NM_001003670 | Gm5414        | 0            | 1 | 0.113855   | 0         | 0          | No change |
| NM_001003685 | Ghrhr         | 0            | 1 | -1.88615   | 0.130838  | 0          | No change |
| NM_001003815 | Epb4.111      | 0            | 1 | 0.12793    | 1.11588   | 1.16086    | No change |

|              |               |   |   |             |           |           |           |
|--------------|---------------|---|---|-------------|-----------|-----------|-----------|
| NM_001003911 | Adamts7       | 0 | 1 | -1.60235    | 0.286802  | 0.0805735 | No change |
| NM_001003913 | Mars          | 0 | 1 | 0.0292032   | 17.4529   | 16.9523   | No change |
| NM_001003915 | Slc5a12       | 0 | 1 | 0.113855    | 0.0136546 | 0.0140656 | No change |
| NM_001003916 | Zc4h2         | 0 | 1 | 0.726832    | 1.0727    | 1.70771   | No change |
| NM_001003947 | Cyp4x1        | 0 | 1 | -0.886145   | 0.0457303 | 0         | No change |
| NM_001003952 | Sval3         | 0 | 1 | 0.113855    | 0         | 0         | No change |
| NM_001003960 | Dnmt3b        | 0 | 1 | -0.453186   | 0.638184  | 0.438264  | No change |
| NM_001003972 | Senp7         | 0 | 1 | 0.599282    | 2.28405   | 3.31807   | No change |
| NM_001004139 | Zfp619        | 0 | 1 | 0.490709    | 0.77125   | 1.03522   | No change |
| NM_001004141 | Cyp2j11       | 0 | 1 | 1.28378     | 0.108051  | 0.29681   | No change |
| NM_001004142 | Nlrp1a        | 0 | 1 | 0.961852    | 0.0580049 | 0.119502  | No change |
| NM_001004149 | Zfp366        | 0 | 1 | 0.251358    | 0.227424  | 0.260301  | No change |
| NM_001004151 | Rtp1          | 0 | 1 | -2.6935     | 0.134025  | 0         | No change |
| NM_001004152 | Psg22         | 0 | 1 | -0.886145   | 0.037249  | 0         | No change |
| NM_001004154 | Rragb         | 0 | 1 | 0.136938    | 3.7581    | 3.93418   | No change |
| NM_001004157 | Scarf1        | 0 | 1 | 0.251358    | 0.459142  | 0.52275   | No change |
| NM_001004159 | Clec4b2       | 0 | 1 | 0.113855    | 0         | 0         | No change |
| NM_001004164 | Gnptab        | 0 | 1 | 0.103208    | 5.45062   | 5.57332   | No change |
| NM_001004177 | Celsr2        | 0 | 1 | 0.205304    | 3.26989   | 3.5892    | No change |
| NM_001004178 | AA415398      | 0 | 1 | 0.446981    | 2.78919   | 3.62924   | No change |
| NM_001004184 | Slc28a1       | 0 | 1 | -1.00162    | 0.293856  | 0.126126  | No change |
| NM_001004190 | Zfp560        | 0 | 1 | 0.32798     | 2.19447   | 2.62465   | No change |
| NM_001004363 | Nuak1         | 0 | 1 | 0.406036    | 0.666652  | 0.844095  | No change |
| NM_001004365 | Actr3b        | 0 | 1 | -0.273168   | 0.651717  | 0.503502  | No change |
| NM_001004367 | Cxxc4         | 0 | 1 | 0.403361    | 0.25332   | 0.322346  | No change |
| NM_001004455 | Cys1          | 0 | 1 | -0.14918    | 0.433855  | 0.365659  | No change |
| NM_001004721 | Pigu          | 0 | 1 | 0.0490037   | 11.6943   | 11.5149   | No change |
| NM_001004762 | Pla2g4c       | 0 | 1 | 0.741886    | 0.433773  | 0.702164  | No change |
| NM_001005225 | Olf1197       | 0 | 1 | 0.113855    | 0         | 0         | No change |
| NM_001005227 | Olf1200       | 0 | 1 | 0.113855    | 0         | 0         | No change |
| NM_001005230 | Olf1024       | 0 | 1 | 0.113855    | 0         | 0         | No change |
| NM_001005232 | Dbx1          | 0 | 1 | 0.113855    | 0         | 0         | No change |
| NM_001005247 | Hps5          | 0 | 1 | -0.0424872  | 8.03201   | 7.42253   | No change |
| NM_001005342 | Ypel4         | 0 | 1 | -0.985681   | 1.29747   | 0.5728    | No change |
| NM_001005343 | Sp9           | 0 | 1 | 0.113855    | 0         | 0         | No change |
| NM_001005371 | Gm13084       | 0 | 1 | 0.113855    | 0         | 0         | No change |
| NM_001005420 | Gm347         | 0 | 1 | -0.280719   | 3.55732   | 2.78443   | No change |
| NM_001005422 | Gm1574        | 0 | 1 | -0.886145   | 0.25566   | 0.105343  | No change |
| NM_001005424 | Gm996         | 0 | 1 | 0.58334     | 0.178547  | 0.260556  | No change |
| NM_001005425 | Zfp663        | 0 | 1 | 1.11385     | 0         | 0.0216826 | No change |
| NM_001005475 | lqsec2        | 0 | 1 | 0.13985     | 0.722761  | 0.758307  | No change |
| NM_001005477 | Barhl2        | 0 | 1 | -1.88615    | 0.0903539 | 0         | No change |
| NM_001005481 | Olf132        | 0 | 1 | 0.113855    | 0         | 0         | No change |
| NM_001005485 | Olf111        | 0 | 1 | 0.113855    | 0.0669481 | 0.0689635 | No change |
| NM_001005488 | Olf1467       | 0 | 1 | -0.886145   | 0.529697  | 0.233847  | No change |
| NM_001005520 | Olf231        | 0 | 1 | -0.886145   | 0.0754253 | 0         | No change |
| NM_001005523 | Rsrc2         | 0 | 1 | 0.0943226   | 13.4481   | 13.6664   | No change |
| NM_001005524 | Olf194        | 0 | 1 | -2.6935     | 0.454026  | 0         | No change |
| NM_001005568 | Olf1281       | 0 | 1 | -0.886145   | 0.0759182 | 0         | No change |
| NM_001005569 | Olf1366       | 0 | 1 | 0.113855    | 0         | 0         | No change |
| NM_001005570 | Olf1707       | 0 | 1 | 0.113855    | 0         | 0         | No change |
| NM_001005608 | Itgb4         | 0 | 1 | 0.236339    | 0.882476  | 0.990622  | No change |
| NM_001005740 | Phactr1       | 0 | 1 | -0.264657   | 1.3562    | 1.07151   | No change |
| NM_001005767 | Parl          | 0 | 1 | -0.00823699 | 22.036    | 20.8531   | No change |
| NM_001005788 | Zfp69         | 0 | 1 | -0.181601   | 0.766504  | 0.637737  | No change |
| NM_001005846 | Mcoln2        | 0 | 1 | -1.88615    | 0.307633  | 0.0576172 | No change |
| NM_001005854 | Gm609         | 0 | 1 | -0.400718   | 0.952448  | 0.676635  | No change |
| NM_001005858 | I830012O16Rik | 0 | 1 | 0.224886    | 2.56199   | 2.85309   | No change |
| NM_001005860 | Clec4a4       | 0 | 1 | -0.886145   | 0.319107  | 0.131485  | No change |
| NM_001007077 | Gm13023       | 0 | 1 | 0.113855    | 0         | 0         | No change |
| NM_001007222 | Tdpoz2        | 0 | 1 | 0.113855    | 0         | 0         | No change |
| NM_001007223 | Clec3a        | 0 | 1 | -2.20807    | 0.0951439 | 0         | No change |
| NM_001007266 | Taar2         | 0 | 1 | 0.113855    | 0         | 0         | No change |
| NM_001007460 | Zdhhc23       | 0 | 1 | -0.41666    | 0.654394  | 0.449396  | No change |
| NM_001007461 | Gsdma3        | 0 | 1 | -0.886145   | 0.0471855 | 0         | No change |
| NM_001007462 | Pabpn1l       | 0 | 1 | -0.886145   | 0.0609204 | 0         | No change |
| NM_001007472 | Noto          | 0 | 1 | 0.113855    | 0         | 0         | No change |
| NM_001007567 | Slc7a6os      | 0 | 1 | 0.188237    | 8.59165   | 9.32106   | No change |
| NM_001007570 | Slc25a42      | 0 | 1 | 0.241234    | 1.40616   | 1.58429   | No change |
| NM_001007572 | Trpv5         | 0 | 1 | -0.886145   | 0.026805  | 0         | No change |
| NM_001007575 | Zfp58         | 0 | 1 | -0.12828    | 6.85407   | 5.96483   | No change |
| NM_001007576 | Gucy2f        | 0 | 1 | 0.988324    | 0.0348534 | 0.0718053 | No change |
| NM_001007579 | BC080695      | 0 | 1 | 0.113855    | 0         | 0         | No change |
| NM_001007581 | 2810408M09Rik | 0 | 1 | -0.00529245 | 6.08134   | 5.7648    | No change |
| NM_001007582 | AY761184      | 0 | 1 | 0.476425    | 0.836315  | 1.14866   | No change |
| NM_001007583 | Best3         | 0 | 1 | 0.376889    | 0.230686  | 0.290438  | No change |

|              |             |   |   |            |           |           |           |
|--------------|-------------|---|---|------------|-----------|-----------|-----------|
| NM_001007584 | Gm11541     | 0 | 1 | -0.623111  | 0.165837  | 0.0854146 | No change |
| NM_001008230 | Rtp2        | 0 | 1 | -0.886145  | 0.0287038 | 0         | No change |
| NM_001008238 | Bnip2       | 0 | 1 | 0.0448132  | 7.81741   | 7.6729    | No change |
| NM_001008419 | Aox311      | 0 | 1 | -2.6935    | 0.0875539 | 0         | No change |
| NM_001008421 | Nol10       | 0 | 1 | -0.262012  | 2.52071   | 1.99553   | No change |
| NM_001008425 | Thoc6       | 0 | 1 | -0.0116761 | 5.21114   | 4.9165    | No change |
| NM_001008427 | Gm5595      | 0 | 1 | 0.277045   | 3.67855   | 4.24583   | No change |
| NM_001008428 | Fbxw20      | 0 | 1 | -1.47111   | 0.0941161 | 0         | No change |
| NM_001008429 | Taar3       | 0 | 1 | 0.113855   | 0         | 0         | No change |
| NM_001008497 | P2ry14      | 0 | 1 | -0.284695  | 2.3759    | 1.8463    | No change |
| NM_001008499 | Taar4       | 0 | 1 | 0.113855   | 0         | 0         | No change |
| NM_001008502 | Bbs12       | 0 | 1 | 0.310443   | 3.8941    | 4.60123   | No change |
| NM_001008549 | Zfp658      | 0 | 1 | 0.510745   | 1.21617   | 1.65622   | No change |
| NM_001008550 | Zfyve26     | 0 | 1 | 0.0891159  | 4.8059    | 4.86628   | No change |
| NM_001008705 | Bud31       | 0 | 1 | -0.150026  | 33.6108   | 28.8182   | No change |
| NM_001008706 | Calm5       | 0 | 1 | 0.113855   | 0         | 0         | No change |
| NM_001008791 | Whrn        | 0 | 1 | 0.0728275  | 1.82451   | 1.82625   | No change |
| NM_001009549 | Zfp36l3     | 0 | 1 | -2.20807   | 0.106686  | 0         | No change |
| NM_001009550 | Mup21       | 0 | 1 | 0.113855   | 0         | 0         | No change |
| NM_001009574 | Taar5       | 0 | 1 | 0.113855   | 0         | 0         | No change |
| NM_001009818 | Sept11      | 0 | 1 | 0.127091   | 3.00593   | 3.12509   | No change |
| NM_001009819 | A3galt2     | 0 | 1 | 0.791927   | 0.185026  | 0.317659  | No change |
| NM_001009927 | Smcr7       | 0 | 1 | -0.139902  | 2.54233   | 2.19187   | No change |
| NM_001009940 | Il19        | 0 | 1 | 0.113855   | 0         | 0         | No change |
| NM_001009947 | Dock11      | 0 | 1 | 0.314153   | 0.481002  | 0.570881  | No change |
| NM_001009948 | Nrsn2       | 0 | 1 | -1.20807   | 0.202009  | 0.0520224 | No change |
| NM_001009950 | Slc38a8     | 0 | 1 | 1.11385    | 0.0265801 | 0.0821407 | No change |
| NM_001009952 | Abpd        | 0 | 1 | 0.113855   | 0         | 0         | No change |
| NM_001010826 | Kctd14      | 0 | 1 | -0.0236487 | 5.27748   | 4.93932   | No change |
| NM_001010827 | Taar7b      | 0 | 1 | 0.113855   | 0         | 0         | No change |
| NM_001010828 | Taar6       | 0 | 1 | 0.113855   | 0         | 0         | No change |
| NM_001010829 | Taar7a      | 0 | 1 | 0.113855   | 0         | 0         | No change |
| NM_001010830 | Taar8a      | 0 | 1 | 0.113855   | 0         | 0         | No change |
| NM_001010831 | Taar9       | 0 | 1 | -0.886145  | 0.0665644 | 0         | No change |
| NM_001010834 | Slc10a5     | 0 | 1 | -0.14918   | 0.302009  | 0.2562    | No change |
| NM_001010835 | Taar7e      | 0 | 1 | 0.113855   | 0.0647102 | 0.0666583 | No change |
| NM_001010837 | Taar8b      | 0 | 1 | 0.113855   | 0         | 0         | No change |
| NM_001010838 | Taar7d      | 0 | 1 | 1.11385    | 0.0647102 | 0.199975  | No change |
| NM_001010839 | Taar7f      | 0 | 1 | 0.113855   | 0.12942   | 0.133317  | No change |
| NM_001010840 | Taar8c      | 0 | 1 | 0.113855   | 0         | 0         | No change |
| NM_001010941 | Gpr12       | 0 | 1 | -0.886145  | 0.0282272 | 0         | No change |
| NM_001011517 | Olf1193     | 0 | 1 | 0.113855   | 0         | 0         | No change |
| NM_001011518 | Olf194      | 0 | 1 | 0.113855   | 0         | 0         | No change |
| NM_001011519 | Olf1148     | 0 | 1 | 0.113855   | 0         | 0         | No change |
| NM_001011520 | Olf1310     | 0 | 1 | 0.113855   | 0         | 0         | No change |
| NM_001011523 | Olf1913     | 0 | 1 | 0.113855   | 0         | 0         | No change |
| NM_001011524 | Olf1418     | 0 | 1 | 1.11385    | 0         | 0.0750167 | No change |
| NM_001011525 | Olf1415     | 0 | 1 | 0.113855   | 0         | 0         | No change |
| NM_001011527 | Olf1503     | 0 | 1 | 1.11385    | 0         | 0.073859  | No change |
| NM_001011528 | Olf1456     | 0 | 1 | 1.69882    | 0         | 0.136485  | No change |
| NM_001011529 | Olf1251     | 0 | 1 | 0.113855   | 0         | 0         | No change |
| NM_001011530 | Olf1723     | 0 | 1 | -0.886145  | 0.0692773 | 0         | No change |
| NM_001011531 | Olf1329-ps  | 0 | 1 | -1.47111   | 0.10722   | 0         | No change |
| NM_001011532 | Olf1037     | 0 | 1 | -0.886145  | 0.0619493 | 0         | No change |
| NM_001011533 | Olf1688     | 0 | 1 | -0.886145  | 0.0721459 | 0         | No change |
| NM_001011534 | Olf1988     | 0 | 1 | 0.113855   | 0         | 0         | No change |
| NM_001011535 | Olf1182     | 0 | 1 | -0.886145  | 0.0591621 | 0         | No change |
| NM_001011536 | Olf1566     | 0 | 1 | 0.113855   | 0         | 0         | No change |
| NM_001011542 | Olf1532-ps1 | 0 | 1 | 0.113855   | 0         | 0         | No change |
| NM_001011662 | Olf180      | 0 | 1 | -1.47111   | 0.122054  | 0         | No change |
| NM_001011684 | Nms         | 0 | 1 | 0.113855   | 0         | 0         | No change |
| NM_001011695 | Olf1000     | 0 | 1 | 0.113855   | 0         | 0         | No change |
| NM_001011707 | Cyp2c66     | 0 | 1 | -1.88615   | 0.128269  | 0         | No change |
| NM_001011721 | Olf102      | 0 | 1 | 0.113855   | 0         | 0         | No change |
| NM_001011733 | Olf1288     | 0 | 1 | -0.886145  | 0.100374  | 0.0344652 | No change |
| NM_001011734 | Olf1116-ps  | 0 | 1 | 0.113855   | 0         | 0         | No change |
| NM_001011735 | Olf1066     | 0 | 1 | 0.113855   | 0         | 0         | No change |
| NM_001011736 | Olf1205     | 0 | 1 | 0.113855   | 0         | 0         | No change |
| NM_001011737 | Olf1357     | 0 | 1 | -0.886145  | 0.0600801 | 0         | No change |
| NM_001011738 | Olf1744     | 0 | 1 | 0.113855   | 0         | 0         | No change |
| NM_001011739 | Olf1885     | 0 | 1 | 0.113855   | 0         | 0         | No change |
| NM_001011740 | Olf1225     | 0 | 1 | 0.113855   | 0         | 0         | No change |
| NM_001011741 | Olf1386     | 0 | 1 | 0.113855   | 0         | 0         | No change |
| NM_001011742 | Olf1479     | 0 | 1 | 0.113855   | 0         | 0         | No change |
| NM_001011743 | Olf1324     | 0 | 1 | 0.113855   | 0         | 0         | No change |
| NM_001011744 | Olf105      | 0 | 1 | 1.11385    | 0         | 0.0764547 | No change |



|              |          |   |   |           |           |           |           |
|--------------|----------|---|---|-----------|-----------|-----------|-----------|
| NM_001011748 | Olfr867  | 0 | 1 | 0.113855  | 0         | 0         | No change |
| NM_001011749 | Olfr704  | 0 | 1 | 0.113855  | 0         | 0         | No change |
| NM_001011750 | Olfr294  | 0 | 1 | 0.113855  | 0         | 0         | No change |
| NM_001011751 | Olfr298  | 0 | 1 | 0.113855  | 0         | 0         | No change |
| NM_001011752 | Olfr293  | 0 | 1 | 0.113855  | 0         | 0         | No change |
| NM_001011753 | Olfr115  | 0 | 1 | 0.113855  | 0         | 0         | No change |
| NM_001011754 | Olfr735  | 0 | 1 | -2.47111  | 0.327197  | 0         | No change |
| NM_001011755 | Olfr671  | 0 | 1 | 0.113855  | 0         | 0         | No change |
| NM_001011756 | Olfr948  | 0 | 1 | 0.113855  | 0         | 0         | No change |
| NM_001011757 | Olfr663  | 0 | 1 | 0.113855  | 0         | 0         | No change |
| NM_001011758 | Olfr1016 | 0 | 1 | 0.113855  | 0         | 0         | No change |
| NM_001011759 | Olfr1031 | 0 | 1 | 0.113855  | 0         | 0         | No change |
| NM_001011760 | Olfr314  | 0 | 1 | -1.47111  | 0.123241  | 0         | No change |
| NM_001011761 | Olfr1229 | 0 | 1 | 0.113855  | 0         | 0         | No change |
| NM_001011764 | Olfr106  | 0 | 1 | 0.113855  | 0         | 0         | No change |
| NM_001011767 | Olfr299  | 0 | 1 | 0.113855  | 0         | 0         | No change |
| NM_001011769 | Olfr317  | 0 | 1 | -1.47111  | 0.123569  | 0         | No change |
| NM_001011770 | Olfr332  | 0 | 1 | -0.371572 | 0.416077  | 0.285735  | No change |
| NM_001011771 | Olfr1089 | 0 | 1 | 0.113855  | 0         | 0         | No change |
| NM_001011773 | Olfr1287 | 0 | 1 | -1.47111  | 0.151836  | 0         | No change |
| NM_001011774 | Olfr1028 | 0 | 1 | 0.113855  | 0         | 0         | No change |
| NM_001011775 | Olfr1419 | 0 | 1 | 0.113855  | 0         | 0         | No change |
| NM_001011776 | Olfr527  | 0 | 1 | 0.113855  | 0         | 0         | No change |
| NM_001011777 | Olfr1042 | 0 | 1 | 0.113855  | 0         | 0         | No change |
| NM_001011778 | Olfr285  | 0 | 1 | -1.47111  | 0.145194  | 0         | No change |
| NM_001011779 | Olfr286  | 0 | 1 | -1.47111  | 0.0960619 | 0         | No change |
| NM_001011780 | Olfr287  | 0 | 1 | -2.20807  | 0.156966  | 0         | No change |
| NM_001011782 | Olfr543  | 0 | 1 | 0.611354  | 0.986803  | 1.46123   | No change |
| NM_001011783 | Olfr104  | 0 | 1 | 0.113855  | 0         | 0         | No change |
| NM_001011784 | Olfr1039 | 0 | 1 | 0.113855  | 0         | 0         | No change |
| NM_001011785 | Olfr987  | 0 | 1 | -0.886145 | 0.0749386 | 0         | No change |
| NM_001011787 | Olfr1307 | 0 | 1 | 0.113855  | 0         | 0         | No change |
| NM_001011789 | Olfr222  | 0 | 1 | 0.113855  | 0         | 0         | No change |
| NM_001011790 | Olfr1382 | 0 | 1 | -0.886145 | 0.0744583 | 0         | No change |
| NM_001011791 | Olfr193  | 0 | 1 | -0.886145 | 0.224816  | 0.0771946 | No change |
| NM_001011792 | Olfr207  | 0 | 1 | 0.113855  | 0         | 0         | No change |
| NM_001011793 | Olfr598  | 0 | 1 | 0.113855  | 0         | 0         | No change |
| NM_001011794 | Olfr1322 | 0 | 1 | 0.113855  | 0         | 0         | No change |
| NM_001011795 | Olfr1275 | 0 | 1 | -0.886145 | 0.0742204 | 0         | No change |
| NM_001011796 | Olfr1249 | 0 | 1 | 0.113855  | 0         | 0         | No change |
| NM_001011797 | Olfr782  | 0 | 1 | 0.113855  | 0         | 0         | No change |
| NM_001011798 | Olfr884  | 0 | 1 | 0.113855  | 0         | 0         | No change |
| NM_001011799 | Olfr453  | 0 | 1 | 0.113855  | 0         | 0         | No change |
| NM_001011801 | Olfr213  | 0 | 1 | 0.113855  | 0         | 0         | No change |
| NM_001011802 | Olfr1318 | 0 | 1 | -0.471108 | 0.125573  | 0.0646766 | No change |
| NM_001011803 | Olfr1306 | 0 | 1 | 0.113855  | 0         | 0         | No change |
| NM_001011804 | Olfr1211 | 0 | 1 | 0.113855  | 0         | 0         | No change |
| NM_001011805 | Olfr1385 | 0 | 1 | 0.113855  | 0         | 0         | No change |
| NM_001011806 | Olfr901  | 0 | 1 | 0.113855  | 0         | 0         | No change |
| NM_001011807 | Olfr191  | 0 | 1 | -2.20807  | 0.299755  | 0         | No change |
| NM_001011808 | Olfr198  | 0 | 1 | -0.886145 | 0.0756709 | 0         | No change |
| NM_001011809 | Olfr728  | 0 | 1 | 0.113855  | 0         | 0         | No change |
| NM_001011810 | Olfr485  | 0 | 1 | 0.113855  | 0         | 0         | No change |
| NM_001011811 | Olfr487  | 0 | 1 | 0.113855  | 0         | 0         | No change |
| NM_001011812 | Olfr951  | 0 | 1 | 0.113855  | 0         | 0         | No change |
| NM_001011813 | Olfr93   | 0 | 1 | -1.47111  | 0.148441  | 0         | No change |
| NM_001011814 | Olfr524  | 0 | 1 | 1.11385   | 0         | 0.0750167 | No change |
| NM_001011815 | Olfr533  | 0 | 1 | 0.113855  | 0         | 0         | No change |
| NM_001011816 | Olfr1181 | 0 | 1 | 0.113855  | 0         | 0         | No change |
| NM_001011818 | Olfr316  | 0 | 1 | -2.88615  | 0.529697  | 0         | No change |
| NM_001011819 | Olfr312  | 0 | 1 | 0.113855  | 0         | 0         | No change |
| NM_001011820 | Olfr1359 | 0 | 1 | 0.113855  | 0         | 0         | No change |
| NM_001011821 | Olfr804  | 0 | 1 | 0.113855  | 0         | 0         | No change |
| NM_001011822 | Olfr787  | 0 | 1 | -2.88615  | 0.519543  | 0         | No change |
| NM_001011823 | Olfr834  | 0 | 1 | 0.113855  | 0.0742204 | 0.0764547 | No change |
| NM_001011824 | Olfr832  | 0 | 1 | 0.113855  | 0.0742204 | 0.0764547 | No change |
| NM_001011825 | Olfr1105 | 0 | 1 | 0.113855  | 0         | 0         | No change |
| NM_001011826 | Olfr967  | 0 | 1 | 0.113855  | 0         | 0         | No change |
| NM_001011827 | Olfr963  | 0 | 1 | 0.113855  | 0         | 0         | No change |
| NM_001011828 | Olfr304  | 0 | 1 | 0.113855  | 0         | 0         | No change |
| NM_001011830 | Olfr119  | 0 | 1 | 0.113855  | 0         | 0         | No change |
| NM_001011831 | Olfr1500 | 0 | 1 | 0.113855  | 0         | 0         | No change |
| NM_001011832 | Olfr1490 | 0 | 1 | -0.886145 | 0.0732838 | 0         | No change |
| NM_001011833 | Olfr1137 | 0 | 1 | -0.886145 | 0.0746977 | 0         | No change |
| NM_001011834 | Olfr1152 | 0 | 1 | 0.113855  | 0         | 0         | No change |
| NM_001011835 | Olfr1162 | 0 | 1 | 0.113855  | 0         | 0         | No change |

|              |               |   |   |            |           |           |           |
|--------------|---------------|---|---|------------|-----------|-----------|-----------|
| NM_001011836 | Olfr1129      | 0 | 1 | 0.113855   | 0         | 0         | No change |
| NM_001011837 | Olfr748       | 0 | 1 | 0.113855   | 0         | 0         | No change |
| NM_001011839 | Olfr1437      | 0 | 1 | 0.113855   | 0         | 0         | No change |
| NM_001011840 | Olfr1463      | 0 | 1 | 0.113855   | 0         | 0         | No change |
| NM_001011841 | Olfr1465      | 0 | 1 | 0.113855   | 0         | 0         | No change |
| NM_001011842 | Olfr1474      | 0 | 1 | 0.113855   | 0         | 0         | No change |
| NM_001011845 | Olfr597       | 0 | 1 | 0.113855   | 0         | 0         | No change |
| NM_001011846 | Olfr517       | 0 | 1 | 0.113855   | 0         | 0         | No change |
| NM_001011847 | Olfr591       | 0 | 1 | 0.113855   | 0         | 0         | No change |
| NM_001011848 | Olfr675       | 0 | 1 | 0.113855   | 0         | 0         | No change |
| NM_001011849 | Olfr792       | 0 | 1 | -1.47111   | 0.148917  | 0         | No change |
| NM_001011850 | Olfr1505      | 0 | 1 | 1.11385    | 0         | 0.07549   | No change |
| NM_001011851 | Olfr412       | 0 | 1 | -0.886145  | 0.0742204 | 0         | No change |
| NM_001011852 | Olfr1029      | 0 | 1 | 0.113855   | 0         | 0         | No change |
| NM_001011853 | Olfr1425      | 0 | 1 | 1.69882    | 0         | 0.1534    | No change |
| NM_001011854 | Olfr605       | 0 | 1 | 0.113855   | 0         | 0         | No change |
| NM_001011855 | Olfr169       | 0 | 1 | 0.113855   | 0         | 0         | No change |
| NM_001011856 | Olfr1331      | 0 | 1 | 0.113855   | 0         | 0         | No change |
| NM_001011857 | Olfr685       | 0 | 1 | 0.113855   | 0         | 0         | No change |
| NM_001011858 | Olfr504       | 0 | 1 | 0.113855   | 0         | 0         | No change |
| NM_001011859 | Olfr965       | 0 | 1 | -0.886145  | 0.0742204 | 0         | No change |
| NM_001011860 | Olfr1222      | 0 | 1 | 0.113855   | 0         | 0         | No change |
| NM_001011861 | Olfr331       | 0 | 1 | -1.47111   | 0.147498  | 0         | No change |
| NM_001011862 | Olfr699       | 0 | 1 | -2.20807   | 0.293135  | 0         | No change |
| NM_001011863 | Olfr406-ps    | 0 | 1 | 0.113855   | 0         | 0         | No change |
| NM_001011864 | Olfr917       | 0 | 1 | 0.113855   | 0         | 0         | No change |
| NM_001011865 | Olfr624       | 0 | 1 | 0.113855   | 0         | 0         | No change |
| NM_001011866 | Olfr309       | 0 | 1 | 0.113855   | 0         | 0         | No change |
| NM_001011867 | Olfr538       | 0 | 1 | -1.47111   | 0.149395  | 0         | No change |
| NM_001011868 | Olfr1178      | 0 | 1 | 0.113855   | 0         | 0         | No change |
| NM_001011869 | Olfr452       | 0 | 1 | 0.113855   | 0         | 0         | No change |
| NM_001011870 | Olfr1329      | 0 | 1 | 0.113855   | 0         | 0         | No change |
| NM_001011871 | Olfr506       | 0 | 1 | 0.113855   | 0         | 0         | No change |
| NM_001011872 | Olfr1034      | 0 | 1 | -0.14918   | 0.34063   | 0.280708  | No change |
| NM_001011873 | Xkr9          | 0 | 1 | -0.301183  | 0.108556  | 0.0745493 | No change |
| NM_001011874 | Xkr4          | 0 | 1 | 0.435783   | 0.134246  | 0.177798  | No change |
| NM_001011876 | Ang6          | 0 | 1 | 0.113855   | 0         | 0         | No change |
| NM_001012236 | Trex1         | 0 | 1 | 0.432216   | 5.25984   | 6.77273   | No change |
| NM_001012265 | Olfr857       | 0 | 1 | -0.886145  | 0.0749386 | 0         | No change |
| NM_001012266 | Olfr835       | 0 | 1 | 0.113855   | 0         | 0         | No change |
| NM_001012269 | Olfr1513      | 0 | 1 | 0.113855   | 0         | 0         | No change |
| NM_001012307 | Defa23        | 0 | 1 | 1.11385    | 0         | 0.171749  | No change |
| NM_001012322 | Sctr          | 0 | 1 | -0.886145  | 0.181303  | 0.0747044 | No change |
| NM_001012323 | Mup20         | 0 | 1 | 0.113855   | 0         | 0         | No change |
| NM_001012325 | Zfp708        | 0 | 1 | -0.162476  | 2.96566   | 2.51749   | No change |
| NM_001012335 | Mdk           | 0 | 1 | -0.533843  | 3.73645   | 2.4265    | No change |
| NM_001012392 | U46068        | 0 | 1 | -1.88615   | 0.124972  | 0         | No change |
| NM_001012400 | AU022252      | 0 | 1 | -0.371572  | 7.01782   | 5.15265   | No change |
| NM_001012450 | Ankrd6        | 0 | 1 | 0.289297   | 1.69336   | 1.97186   | No change |
| NM_001012477 | Cxcl12        | 0 | 1 | 0.330666   | 2.26164   | 2.70957   | No change |
| NM_001012520 | Klri1         | 0 | 1 | 0.435783   | 0.249497  | 0.342678  | No change |
| NM_001012638 | Acd           | 0 | 1 | -0.232073  | 9.58584   | 7.75846   | No change |
| NM_001012723 | Wfdc16        | 0 | 1 | 0.0250455  | 16.5995   | 16.0745   | No change |
| NM_001012765 | Adcy5         | 0 | 1 | -0.125972  | 1.51506   | 1.31948   | No change |
| NM_001012766 | Ear12         | 0 | 1 | -0.886145  | 0.443904  | 0.152422  | No change |
| NM_001013013 | Dhrs7c        | 0 | 1 | 0.113855   | 0         | 0         | No change |
| NM_001013019 | Lrrn4cl       | 0 | 1 | -0.793036  | 0.37774   | 0.194555  | No change |
| NM_001013023 | Mterf         | 0 | 1 | -0.0478963 | 3.29218   | 3.02607   | No change |
| NM_001013024 | Usp13         | 0 | 1 | -0.471108  | 0.0297452 | 0.0153203 | No change |
| NM_001013026 | Ttf2          | 0 | 1 | -0.249616  | 3.49923   | 2.79828   | No change |
| NM_001013256 | 1500010J02Rik | 0 | 1 | -0.167327  | 4.80007   | 4.06592   | No change |
| NM_001013365 | Osm           | 0 | 1 | -0.301183  | 0.109638  | 0.0752921 | No change |
| NM_001013366 | Wdr91         | 0 | 1 | 0.376889   | 2.7486    | 3.40306   | No change |
| NM_001013367 | Prkaa1        | 0 | 1 | 0.0949463  | 5.73413   | 5.82964   | No change |
| NM_001013369 | Pfdn4         | 0 | 1 | -0.232321  | 6.29704   | 5.0841    | No change |
| NM_001013371 | Dtx3l         | 0 | 1 | 0.141467   | 2.77104   | 2.90988   | No change |
| NM_001013372 | Nrp           | 0 | 1 | 0.403361   | 2.08483   | 2.63847   | No change |
| NM_001013373 | Tmprss13      | 0 | 1 | -0.264657  | 0.816378  | 0.641781  | No change |
| NM_001013374 | Lman2l        | 0 | 1 | -0.323725  | 5.35618   | 4.06547   | No change |
| NM_001013380 | Dync1li2      | 0 | 1 | -0.0229382 | 33.5754   | 31.456    | No change |
| NM_001013384 | Podn1         | 0 | 1 | -0.301183  | 0.234544  | 0.172574  | No change |
| NM_001013385 | Grm4          | 0 | 1 | -0.886145  | 0.0234262 | 0         | No change |
| NM_001013386 | Rasl10b       | 0 | 1 | -1.26466   | 0.240251  | 0.0824947 | No change |
| NM_001013390 | Scn4b         | 0 | 1 | -0.301183  | 0.180637  | 0.135327  | No change |
| NM_001013393 | Gm11487       | 0 | 1 | 0.113855   | 0         | 0         | No change |
| NM_001013411 | Nkain2        | 0 | 1 | -0.0877791 | 0.478391  | 0.425594  | No change |

|              |               |   |   |            |           |           |           |
|--------------|---------------|---|---|------------|-----------|-----------|-----------|
| NM_001013412 | Ccl26         | 0 | 1 | 0.113855   | 0         | 0         | No change |
| NM_001013577 | 1110054O05Rik | 0 | 1 | 0.125978   | 5.11428   | 5.31289   | No change |
| NM_001013607 | Vmo1          | 0 | 1 | -0.886145  | 0.10371   | 0         | No change |
| NM_001013741 | Ddn           | 0 | 1 | 1.49237    | 0.0745379 | 0.230345  | No change |
| NM_001013756 | Grlh3         | 0 | 1 | -2.6935    | 0.150471  | 0         | No change |
| NM_001013757 | Vwde          | 0 | 1 | 0.113855   | 0         | 0         | No change |
| NM_001013758 | Lingo3        | 0 | 1 | 0.113855   | 0.0202773 | 0.0208877 | No change |
| NM_001013759 | Gas2l2        | 0 | 1 | 0.336247   | 0.133511  | 0.165037  | No change |
| NM_001013761 | Gm606         | 0 | 1 | -0.301183  | 0.187714  | 0.140629  | No change |
| NM_001013762 | Gm4952        | 0 | 1 | 1.11385    | 0         | 0.0455238 | No change |
| NM_001013764 | Ces1a         | 0 | 1 | -0.784266  | 1.40865   | 0.761804  | No change |
| NM_001013765 | Zscan4c       | 0 | 1 | -2.88615   | 0.214346  | 0         | No change |
| NM_001013766 | Samd3         | 0 | 1 | -0.886145  | 0.0266004 | 0         | No change |
| NM_001013776 | Fbxw24        | 0 | 1 | -1.10854   | 0.608876  | 0.241233  | No change |
| NM_001013778 | Fam18a        | 0 | 1 | 0.0900081  | 2.55463   | 2.58804   | No change |
| NM_001013779 | Aim2          | 0 | 1 | 0.113855   | 0.357118  | 0.367869  | No change |
| NM_001013784 | E130309D14Rik | 0 | 1 | 0.0358523  | 0.644338  | 0.627857  | No change |
| NM_001013787 | Vmn1r209      | 0 | 1 | -0.886145  | 0.0742204 | 0         | No change |
| NM_001013797 | Spink6        | 0 | 1 | 0.765932   | 0.712364  | 1.22301   | No change |
| NM_001013799 | A530098C11Rik | 0 | 1 | 0.435783   | 0.449218  | 0.594953  | No change |
| NM_001013802 | Macrod2       | 0 | 1 | -0.353271  | 1.69354   | 1.25151   | No change |
| NM_001013804 | Flg2          | 0 | 1 | 0.113855   | 0         | 0         | No change |
| NM_001013811 | Fam169b       | 0 | 1 | -0.608611  | 0.791122  | 0.48387   | No change |
| NM_001013817 | Sp140         | 0 | 1 | 0.265858   | 1.78848   | 2.05032   | No change |
| NM_001013820 | Gm5631        | 0 | 1 | 0.113855   | 0         | 0         | No change |
| NM_001013823 | Krtap4-16     | 0 | 1 | 0.113855   | 0         | 0         | No change |
| NM_001013824 | Gm5662        | 0 | 1 | 1.11385    | 0         | 0.0389956 | No change |
| NM_001013829 | Shf           | 0 | 1 | -0.230974  | 5.63627   | 4.56181   | No change |
| NM_001013832 | Gpr31c        | 0 | 1 | -0.371572  | 0.435581  | 0.299129  | No change |
| NM_001014395 | Fbxw22        | 0 | 1 | 0.113855   | 0         | 0         | No change |
| NM_001014397 | Gm13154       | 0 | 1 | -0.0560702 | 0.197221  | 0.177763  | No change |
| NM_001014398 | Trcg1         | 0 | 1 | -0.886145  | 0.129013  | 0.0531588 | No change |
| NM_001014399 | Abi3bp        | 0 | 1 | 0.413415   | 1.14839   | 1.46022   | No change |
| NM_001014995 | Fam189b       | 0 | 1 | 0.229332   | 0.250612  | 0.281625  | No change |
| NM_001014997 | Gm156         | 0 | 1 | 0.113855   | 0         | 0         | No change |
| NM_001015039 | Zfyve28       | 0 | 1 | -0.886145  | 0.43777   | 0.216455  | No change |
| NM_001015099 | G2e3          | 0 | 1 | -0.0525385 | 4.81148   | 4.41524   | No change |
| NM_001015681 | E130308A19Rik | 0 | 1 | 0.20079    | 3.09403   | 3.38637   | No change |
| NM_001015876 | Tyw1          | 0 | 1 | 0.158249   | 3.63794   | 3.86531   | No change |
| NM_001017362 | Arid3c        | 0 | 1 | -2.47111   | 0.199009  | 0         | No change |
| NM_001017422 | Ear4          | 0 | 1 | 0.113855   | 0         | 0         | No change |
| NM_001017525 | Btbd11        | 0 | 1 | 1.05245    | 0.194821  | 0.401373  | No change |
| NM_001017955 | Zscan18       | 0 | 1 | 0.191299   | 5.20871   | 5.6625    | No change |
| NM_001017968 | Zdhhc18       | 0 | 1 | 0.439625   | 1.81148   | 2.34512   | No change |
| NM_001018002 | Dppa4         | 0 | 1 | -3.05607   | 0.404603  | 0         | No change |
| NM_001018019 | Grxcr1        | 0 | 1 | 0.113855   | 0         | 0         | No change |
| NM_001018031 | Otol1         | 0 | 1 | 0.113855   | 0         | 0         | No change |
| NM_001018063 | Cxx1b         | 0 | 1 | 0.13247    | 4.29924   | 4.48694   | No change |
| NM_001018079 | Lce3f         | 0 | 1 | 0.113855   | 0         | 0         | No change |
| NM_001018087 | Ldoc1         | 0 | 1 | 0.113855   | 0         | 0         | No change |
| NM_001024134 | Trim15        | 0 | 1 | 0.239386   | 0.378149  | 0.428487  | No change |
| NM_001024136 | Anks6         | 0 | 1 | 0.288533   | 1.96208   | 2.28389   | No change |
| NM_001024138 | Gpr139        | 0 | 1 | 0.113855   | 0         | 0         | No change |
| NM_001024147 | Gm5868        | 0 | 1 | -0.886145  | 0.0505021 | 0         | No change |
| NM_001024148 | Ugt2a2        | 0 | 1 | 0.113855   | 0         | 0         | No change |
| NM_001024225 | Defa24        | 0 | 1 | -0.886145  | 0.166332  | 0         | No change |
| NM_001024230 | Gm5431        | 0 | 1 | -0.14918   | 0.961767  | 0.821573  | No change |
| NM_001024468 | Bcat1         | 0 | 1 | -0.0381483 | 0.346997  | 0.320782  | No change |
| NM_001024478 | Cdhr3         | 0 | 1 | -0.181601  | 0.613619  | 0.510535  | No change |
| NM_001024512 | Fam149b       | 0 | 1 | -0.143704  | 7.51422   | 6.47005   | No change |
| NM_001024602 | AW555464      | 0 | 1 | 0.133709   | 4.53424   | 4.73561   | No change |
| NM_001024616 | B230208H17Rik | 0 | 1 | 0.137291   | 22.907    | 23.9834   | No change |
| NM_001024617 | Inpp4b        | 0 | 1 | -0.371572  | 0.574857  | 0.417997  | No change |
| NM_001024618 | Xirp2         | 0 | 1 | 0.113855   | 0         | 0         | No change |
| NM_001024645 | Lrrc16b       | 0 | 1 | 0.113855   | 0.106101  | 0.109295  | No change |
| NM_001024673 | Il28a         | 0 | 1 | -0.886145  | 0.119747  | 0         | No change |
| NM_001024698 | Cpa2          | 0 | 1 | 0.28378    | 0.368189  | 0.433455  | No change |
| NM_001024699 | Zbtb45        | 0 | 1 | 0.508714   | 1.72604   | 2.3483    | No change |
| NM_001024702 | C1ql4         | 0 | 1 | 0.599282   | 0.388803  | 0.600761  | No change |
| NM_001024705 | Prpmp5        | 0 | 1 | 0.113855   | 0         | 0         | No change |
| NM_001024707 | Lrp3          | 0 | 1 | -0.137684  | 0.424741  | 0.364606  | No change |
| NM_001024709 | Krtap10-10    | 0 | 1 | 0.113855   | 0.0534046 | 0.0550122 | No change |
| NM_001024714 | Cma2          | 0 | 1 | 0.113855   | 0         | 0         | No change |
| NM_001024719 | Cyp2c67       | 0 | 1 | 0.113855   | 0         | 0         | No change |
| NM_001024721 | BC094916      | 0 | 1 | -0.886145  | 0.269293  | 0.11096   | No change |
| NM_001024726 | Zfp607        | 0 | 1 | 0.0549611  | 2.95763   | 2.92398   | No change |

|              |               |   |   |            |           |           |           |
|--------------|---------------|---|---|------------|-----------|-----------|-----------|
| NM_001024842 | Hoxc11        | 0 | 1 | 0.113855   | 0         | 0         | No change |
| NM_001024850 | Rhox10        | 0 | 1 | -1.47111   | 0.183402  | 0         | No change |
| NM_001024851 | Ankrd34a      | 0 | 1 | 2.11385    | 0         | 0.0832842 | No change |
| NM_001024853 | Timm9         | 0 | 1 | -0.18745   | 13.4981   | 11.2699   | No change |
| NM_001024919 | Bod1          | 0 | 1 | -0.0719067 | 34.1008   | 30.8773   | No change |
| NM_001024920 | Trp53i13      | 0 | 1 | -0.579484  | 3.82648   | 2.41756   | No change |
| NM_001024926 | Cyb5d2        | 0 | 1 | -0.235834  | 6.51171   | 5.25742   | No change |
| NM_001024928 | Zfp667        | 0 | 1 | -0.0503746 | 2.9806    | 2.73787   | No change |
| NM_001024932 | Pilrb2        | 0 | 1 | -1.76061   | 0.385683  | 0.0794587 | No change |
| NM_001024950 | Zfp563        | 0 | 1 | 0.265098   | 2.06392   | 2.36229   | No change |
| NM_001025074 | Ntrk2         | 0 | 1 | 0.215734   | 0.605368  | 0.670361  | No change |
| NM_001025083 | Rhox12        | 0 | 1 | -0.886145  | 0.0745379 | 0         | No change |
| NM_001025084 | Rhox1         | 0 | 1 | -1.47111   | 0.158034  | 0         | No change |
| NM_001025086 | Rhox7         | 0 | 1 | -0.886145  | 0.0708982 | 0         | No change |
| NM_001025102 | 2700007P21Rik | 0 | 1 | -0.15122   | 11.9034   | 10.2      | No change |
| NM_001025106 | Tmem201       | 0 | 1 | 0.308358   | 1.44816   | 1.70931   | No change |
| NM_001025156 | Ccdc93        | 0 | 1 | -0.130071  | 3.01593   | 2.62191   | No change |
| NM_001025163 | Zfp78         | 0 | 1 | -0.279809  | 0.968161  | 0.755535  | No change |
| NM_001025244 | Krtap31-2     | 0 | 1 | 0.113855   | 0         | 0         | No change |
| NM_001025245 | Mbp           | 0 | 1 | 0.245099   | 1.20011   | 1.35539   | No change |
| NM_001025296 | Dffa          | 0 | 1 | 0.269506   | 2.21608   | 2.54619   | No change |
| NM_001025310 | St6galnac6    | 0 | 1 | 0.181418   | 4.20711   | 4.54298   | No change |
| NM_001025313 | Tapbp         | 0 | 1 | 0.100109   | 29.3724   | 29.9695   | No change |
| NM_001025351 | Defb46        | 0 | 1 | 1.11385    | 0         | 0.412592  | No change |
| NM_001025371 | Serinc4       | 0 | 1 | 0.127167   | 23.7077   | 24.648    | No change |
| NM_001025372 | Adcyap1r1     | 0 | 1 | -0.166253  | 0.18105   | 0.151532  | No change |
| NM_001025381 | Gpr17         | 0 | 1 | -0.123184  | 0.429458  | 0.373263  | No change |
| NM_001025382 | Fam196b       | 0 | 1 | -0.368014  | 1.03806   | 0.761885  | No change |
| NM_001025383 | Gm14685       | 0 | 1 | 0.00915743 | 2.48814   | 2.38181   | No change |
| NM_001025384 | DXBay18       | 0 | 1 | 0.00915743 | 2.41076   | 2.30775   | No change |
| NM_001025385 | Tas2r137      | 0 | 1 | -1.10854   | 0.417323  | 0.143295  | No change |
| NM_001025386 | Olftr243      | 0 | 1 | 0.113855   | 0         | 0         | No change |
| NM_001025435 | BC053393      | 0 | 1 | 0.113855   | 0         | 0         | No change |
| NM_001025561 | Pus1          | 0 | 1 | 0.290178   | 3.69358   | 4.30438   | No change |
| NM_001025567 | Dmbx1         | 0 | 1 | -0.886145  | 0.0173495 | 0         | No change |
| NM_001025571 | Sh2d2a        | 0 | 1 | -1.14918   | 0.16194   | 0.0606599 | No change |
| NM_001025573 | 2010107G12Rik | 0 | 1 | 0.976351   | 0.322952  | 0.63208   | No change |
| NM_001025576 | Ccdc141       | 0 | 1 | 0.403361   | 1.27736   | 1.61073   | No change |
| NM_001025577 | Maf           | 0 | 1 | 0.218824   | 2.00927   | 2.22745   | No change |
| NM_001025581 | Kcnc2         | 0 | 1 | 0.0685308  | 1.07981   | 1.07756   | No change |
| NM_001025594 | Zbtb43        | 0 | 1 | 0.113855   | 5.52299   | 5.68926   | No change |
| NM_001025602 | Il1r1         | 0 | 1 | -0.400718  | 0.123691  | 0.084943  | No change |
| NM_001025606 | Tmem171       | 0 | 1 | -1.47111   | 0.12068   | 0         | No change |
| NM_001025608 | D4Erttd22e    | 0 | 1 | 0.193237   | 10.5608   | 11.4954   | No change |
| NM_001025610 | Ms4a7         | 0 | 1 | 0.320306   | 5.09754   | 6.07147   | No change |
| NM_001025617 | Cant1         | 0 | 1 | -0.0758629 | 15.331    | 13.8434   | No change |
| NM_001026211 | Dnajc19       | 0 | 1 | -0.175652  | 3.86683   | 3.24217   | No change |
| NM_001029836 | Npnt          | 0 | 1 | 0.328359   | 2.46936   | 2.9546    | No change |
| NM_001029841 | Sla           | 0 | 1 | 0.0329348  | 1.34025   | 1.3039    | No change |
| NM_001029842 | Slc16a6       | 0 | 1 | -0.18213   | 2.03326   | 1.70282   | No change |
| NM_001029843 | Vrk1          | 0 | 1 | -0.301183  | 2.30189   | 1.77357   | No change |
| NM_001029856 | Atad5         | 0 | 1 | -0.301183  | 1.83049   | 1.41173   | No change |
| NM_001029867 | Ugt2b36       | 0 | 1 | 0.113855   | 0         | 0         | No change |
| NM_001029868 | Pdzd4         | 0 | 1 | 0.113855   | 0.947487  | 0.97601   | No change |
| NM_001029877 | Nova2         | 0 | 1 | -0.216294  | 0.357955  | 0.291554  | No change |
| NM_001029878 | Lonrf2        | 0 | 1 | 0.0245875  | 0.672632  | 0.65046   | No change |
| NM_001029890 | Mex3a         | 0 | 1 | 0.397162   | 1.26692   | 1.59094   | No change |
| NM_001029893 | Psg26         | 0 | 1 | 0.113855   | 0         | 0         | No change |
| NM_001029895 | Ate1          | 0 | 1 | -0.139002  | 30.838    | 26.6518   | No change |
| NM_001029912 | Zswim5        | 0 | 1 | -0.075623  | 1.66581   | 1.50313   | No change |
| NM_001029933 | Zfp114        | 0 | 1 | -1.47111   | 0.342854  | 0.0963206 | No change |
| NM_001029937 | Sec14i3       | 0 | 1 | -3.05607   | 0.141941  | 0         | No change |
| NM_001029938 | Rilp          | 0 | 1 | 0.666396   | 0.656154  | 1.01386   | No change |
| NM_001029984 | Fcrfb         | 0 | 1 | -0.886145  | 0.054278  | 0         | No change |
| NM_001029987 | Doxl2         | 0 | 1 | 1.69882    | 0.0304602 | 0.156886  | No change |
| NM_001029990 | Mettl17       | 0 | 1 | 0.184244   | 2.53351   | 2.74244   | No change |
| NM_001030274 | Ndufs5        | 0 | 1 | 0.113855   | 39.981    | 41.1846   | No change |
| NM_001030289 | Mmp27         | 0 | 1 | 1.11385    | 0         | 0.043352  | No change |
| NM_001030290 | Rdh8          | 0 | 1 | -0.886145  | 0.0480641 | 0         | No change |
| NM_001030291 | Enpp7         | 0 | 1 | 0.113855   | 0         | 0         | No change |
| NM_001030292 | Kcnk15        | 0 | 1 | 0.113855   | 0         | 0         | No change |
| NM_001030294 | Olfm4         | 0 | 1 | 0.113855   | 0.0424957 | 0.043775  | No change |
| NM_001030296 | Prr7          | 0 | 1 | -1.62311   | 0.461203  | 0.105575  | No change |
| NM_001030297 | Tmprss11c     | 0 | 1 | 0.113855   | 0         | 0         | No change |
| NM_001031622 | Gm16367       | 0 | 1 | -2.6935    | 0.205888  | 0         | No change |
| NM_001031667 | Gsk3a         | 0 | 1 | 0.023657   | 18.2948   | 17.7014   | No change |

|              |               |   |   |             |           |           |           |
|--------------|---------------|---|---|-------------|-----------|-----------|-----------|
| NM_001031851 | Agxt2         | 0 | 1 | 1.11385     | 0         | 0.0393375 | No change |
| NM_001033041 | Acmsd         | 0 | 1 | -0.301183   | 0.0907854 | 0.0623456 | No change |
| NM_001033042 | Lrrc14b       | 0 | 1 | 0.336247    | 1.49741   | 1.80392   | No change |
| NM_001033122 | Cd69          | 0 | 1 | -1.62311    | 0.387183  | 0.0886308 | No change |
| NM_001033124 | Ntrk1         | 0 | 1 | 0.435783    | 0.296222  | 0.388359  | No change |
| NM_001033126 | Cd27          | 0 | 1 | -0.383645   | 1.01709   | 0.728842  | No change |
| NM_001033131 | Krtdap        | 0 | 1 | 0.113855    | 0         | 0         | No change |
| NM_001033141 | Ecscr         | 0 | 1 | 0.403361    | 2.76012   | 3.48939   | No change |
| NM_001033145 | 1190002N15Rik | 0 | 1 | 0.0414463   | 2.50542   | 2.45362   | No change |
| NM_001033156 | Fbxo33        | 0 | 1 | 0.204482    | 10.2739   | 11.2707   | No change |
| NM_001033157 | 5730507C01Rik | 0 | 1 | -0.118806   | 1.29793   | 1.13354   | No change |
| NM_001033158 | Rasl12        | 0 | 1 | -0.281283   | 2.72574   | 2.12802   | No change |
| NM_001033163 | Ephx3         | 0 | 1 | 1.03985     | 0.259618  | 0.534867  | No change |
| NM_001033165 | Dnajc25       | 0 | 1 | 0.451724    | 2.70837   | 3.5365    | No change |
| NM_001033167 | Slc22a23      | 0 | 1 | -0.135505   | 0.691243  | 0.597205  | No change |
| NM_001033177 | Krt76         | 0 | 1 | -2.20807    | 0.120576  | 0         | No change |
| NM_001033178 | Tmem181a      | 0 | 1 | 0.418709    | 2.49836   | 3.18815   | No change |
| NM_001033194 | Gtf3c3        | 0 | 1 | 0.170562    | 10.3902   | 11.133    | No change |
| NM_001033196 | Znfx1         | 0 | 1 | -0.00155239 | 16.5779   | 15.7634   | No change |
| NM_001033197 | AU015228      | 0 | 1 | 1.11385     | 0         | 0.0240748 | No change |
| NM_001033199 | Al747448      | 0 | 1 | 1.69882     | 0         | 0.0479086 | No change |
| NM_001033202 | Usp30         | 0 | 1 | -0.082655   | 6.64456   | 5.96972   | No change |
| NM_001033204 | Rpusd3        | 0 | 1 | 0.349668    | 5.82147   | 7.07161   | No change |
| NM_001033205 | Zfp575        | 0 | 1 | 0.698817    | 0.12713   | 0.209532  | No change |
| NM_001033209 | Xylb          | 0 | 1 | -0.0399505  | 1.58885   | 1.4693    | No change |
| NM_001033211 | AU022751      | 0 | 1 | -0.433633   | 0.681779  | 0.468202  | No change |
| NM_001033217 | Prickle1      | 0 | 1 | 0.0999156   | 3.53156   | 3.60273   | No change |
| NM_001033221 | AU023871      | 0 | 1 | 0.528892    | 0.804625  | 1.11576   | No change |
| NM_001033227 | Slc5a10       | 0 | 1 | -0.0787903  | 0.462359  | 0.412774  | No change |
| NM_001033231 | Fam195b       | 0 | 1 | 0.0707861   | 35.3381   | 35.3295   | No change |
| NM_001033233 | Tmprss11a     | 0 | 1 | -2.20807    | 0.10492   | 0         | No change |
| NM_001033235 | Trim40        | 0 | 1 | -0.886145   | 0.0317219 | 0         | No change |
| NM_001033236 | Mettl21d      | 0 | 1 | -0.0116761  | 4.00378   | 3.77479   | No change |
| NM_001033239 | Csta          | 0 | 1 | 0.528892    | 0.0510384 | 0.0788623 | No change |
| NM_001033245 | Hk3           | 0 | 1 | -1.17565    | 0.45466   | 0.178418  | No change |
| NM_001033251 | Gpr174        | 0 | 1 | -1.34558    | 0.138006  | 0.0426481 | No change |
| NM_001033254 | Pak6          | 0 | 1 | -0.638218   | 0.522234  | 0.312361  | No change |
| NM_001033263 | Agap2         | 0 | 1 | -0.139902   | 0.371168  | 0.318618  | No change |
| NM_001033264 | Gis2          | 0 | 1 | 0.467492    | 0.481618  | 0.642033  | No change |
| NM_001033269 | Eif4e1b       | 0 | 1 | -0.886145   | 0.0367579 | 0         | No change |
| NM_001033279 | D17Wsu92e     | 0 | 1 | 0.12895     | 24.3349   | 25.3313   | No change |
| NM_001033280 | Gm94          | 0 | 1 | 0.113855    | 0         | 0         | No change |
| NM_001033281 | Prdm6         | 0 | 1 | -1.14918    | 0.294741  | 0.110405  | No change |
| NM_001033283 | Gm97          | 0 | 1 | 0.113855    | 0         | 0         | No change |
| NM_001033286 | Slc30a10      | 0 | 1 | 0.113855    | 0         | 0         | No change |
| NM_001033291 | Usp40         | 0 | 1 | 0.109555    | 9.26202   | 9.51241   | No change |
| NM_001033302 | Gm129         | 0 | 1 | -0.670416   | 3.0475    | 1.80121   | No change |
| NM_001033303 | Ampd1         | 0 | 1 | -1.30118    | 0.208305  | 0.0613074 | No change |
| NM_001033306 | Shb           | 0 | 1 | 0.400953    | 2.74302   | 3.4535    | No change |
| NM_001033308 | BC013712      | 0 | 1 | -0.54911    | 1.01441   | 0.649564  | No change |
| NM_001033310 | Cox18         | 0 | 1 | 0.113855    | 4.30657   | 4.43622   | No change |
| NM_001033311 | Vsig10        | 0 | 1 | 0.113855    | 5.46679   | 5.63136   | No change |
| NM_001033312 | Fbxl18        | 0 | 1 | -0.554524   | 2.16636   | 1.39474   | No change |
| NM_001033313 | Pdap1         | 0 | 1 | 0.00693961  | 22.5561   | 21.5731   | No change |
| NM_001033314 | Ccdc61        | 0 | 1 | -0.301183   | 3.98741   | 3.07165   | No change |
| NM_001033316 | Ffar3         | 0 | 1 | 0.113855    | 0         | 0         | No change |
| NM_001033320 | Rltpr         | 0 | 1 | -0.803683   | 0.445322  | 0.229364  | No change |
| NM_001033322 | Gucy1a2       | 0 | 1 | 0.637417    | 0.409725  | 0.612667  | No change |
| NM_001033324 | Zbtb16        | 0 | 1 | -0.133363   | 1.71711   | 1.48804   | No change |
| NM_001033333 | Gm239         | 0 | 1 | -1.47111    | 0.111903  | 0.0230543 | No change |
| NM_001033335 | Serpina3f     | 0 | 1 | -0.886145   | 0.472388  | 0.227084  | No change |
| NM_001033339 | Mmp25         | 0 | 1 | -1.6935     | 0.268606  | 0.063852  | No change |
| NM_001033340 | Lrrc30        | 0 | 1 | 1.11385     | 0         | 0.0408135 | No change |
| NM_001033341 | Zfp407        | 0 | 1 | -0.150253   | 7.10325   | 6.09152   | No change |
| NM_001033343 | Sec31b        | 0 | 1 | 0.229332    | 0.834965  | 0.933301  | No change |
| NM_001033346 | Lrrc55        | 0 | 1 | -1.54911    | 0.432577  | 0.123778  | No change |
| NM_001033349 | Gm410         | 0 | 1 | -0.14918    | 0.198104  | 0.163254  | No change |
| NM_001033350 | Bank1         | 0 | 1 | -0.709267   | 0.472203  | 0.265319  | No change |
| NM_001033351 | Grin3a        | 0 | 1 | -0.301183   | 0.0624489 | 0.0428859 | No change |
| NM_001033354 | Iqsec3        | 0 | 1 | -3.05607    | 0.0815122 | 0         | No change |
| NM_001033355 | Zfp568        | 0 | 1 | 0.154882    | 2.01037   | 2.13092   | No change |
| NM_001033356 | Ntn5          | 0 | 1 | -1.07057    | 1.06266   | 0.456105  | No change |
| NM_001033360 | Gpr101        | 0 | 1 | -0.886145   | 0.0128822 | 0         | No change |
| NM_001033364 | Cdhr2         | 0 | 1 | 0.0336845   | 0.607935  | 0.591445  | No change |
| NM_001033366 | Dpcr1         | 0 | 1 | 0.113855    | 0         | 0         | No change |
| NM_001033373 | Cdk15         | 0 | 1 | -0.886145   | 0.0471855 | 0         | No change |

|              |               |   |   |            |           |           |           |
|--------------|---------------|---|---|------------|-----------|-----------|-----------|
| NM_001033374 | Gm694         | 0 | 1 | -0.301183  | 0.231026  | 0.158654  | No change |
| NM_001033378 | A430078G23Rik | 0 | 1 | -1.38865   | 0.37583   | 0.120982  | No change |
| NM_001033380 | Itpril2       | 0 | 1 | 0.298887   | 0.95442   | 1.11912   | No change |
| NM_001033382 | Cacna2d4      | 0 | 1 | -2.88615   | 0.0840687 | 0         | No change |
| NM_001033383 | Zfp865        | 0 | 1 | 0.0980875  | 1.60234   | 1.63244   | No change |
| NM_001033385 | D630037F22Rik | 0 | 1 | 0.0917948  | 6.33485   | 6.42638   | No change |
| NM_001033391 | Ipcef1        | 0 | 1 | 0.34832    | 1.959     | 2.38488   | No change |
| NM_001033393 | Tmem104       | 0 | 1 | 0.0657605  | 0.915807  | 0.911931  | No change |
| NM_001033394 | Tmem88b       | 0 | 1 | -1.6935    | 0.401573  | 0.103415  | No change |
| NM_001033397 | Krt26         | 0 | 1 | 0.113855   | 0         | 0         | No change |
| NM_001033399 | Gfod1         | 0 | 1 | -0.471108  | 0.27232   | 0.183415  | No change |
| NM_001033404 | Gm813         | 0 | 1 | -0.886145  | 0.0992777 | 0         | No change |
| NM_001033405 | Trem12        | 0 | 1 | 2.69882    | 0         | 0.0796085 | No change |
| NM_001033407 | Gm815         | 0 | 1 | 0.113855   | 0         | 0         | No change |
| NM_001033410 | Gm757         | 0 | 1 | -3.05607   | 0.275875  | 0         | No change |
| NM_001033411 | Gm826         | 0 | 1 | 0.113855   | 0.0635305 | 0.065443  | No change |
| NM_001033412 | Gm829         | 0 | 1 | 0.113855   | 0         | 0         | No change |
| NM_001033419 | Ceacam16      | 0 | 1 | -1.47111   | 0.0852513 | 0         | No change |
| NM_001033424 | Fnd3c2        | 0 | 1 | -0.886145  | 0.0190522 | 0         | No change |
| NM_001033426 | Grxcr2        | 0 | 1 | 0.113855   | 0         | 0         | No change |
| NM_001033427 | Lyg2          | 0 | 1 | -0.886145  | 0.081544  | 0.0279996 | No change |
| NM_001033428 | Tmem211       | 0 | 1 | 0.113855   | 0         | 0         | No change |
| NM_001033429 | Trim75        | 0 | 1 | -1.88615   | 0.0834979 | 0         | No change |
| NM_001033431 | Nlrp12        | 0 | 1 | -1.47111   | 0.0321982 | 0         | No change |
| NM_001033432 | Heca          | 0 | 1 | 0.163653   | 10.2629   | 10.9439   | No change |
| NM_001033435 | Gm885         | 0 | 1 | 0.988324   | 0.263988  | 0.543871  | No change |
| NM_001033437 | Gm889         | 0 | 1 | -1.47111   | 0.11491   | 0         | No change |
| NM_001033439 | Lrch1         | 0 | 1 | 0.252561   | 1.59907   | 1.81498   | No change |
| NM_001033440 | Gm1587        | 0 | 1 | -0.886145  | 0.0514719 | 0         | No change |
| NM_001033442 | Gm1604b       | 0 | 1 | -0.886145  | 0.267707  | 0.0919219 | No change |
| NM_001033444 | Capn13        | 0 | 1 | 0.251358   | 0.239953  | 0.27464   | No change |
| NM_001033450 | Mnda          | 0 | 1 | -0.0436865 | 3.63028   | 3.34822   | No change |
| NM_001033451 | Zfp408        | 0 | 1 | 0.277635   | 3.39147   | 3.91587   | No change |
| NM_001033452 | Accsl         | 0 | 1 | 0.113855   | 0         | 0         | No change |
| NM_001033457 | Nom1          | 0 | 1 | 0.285679   | 4.95839   | 5.75625   | No change |
| NM_001033458 | Gm1673        | 0 | 1 | -0.645137  | 3.41154   | 2.00814   | No change |
| NM_001033463 | Tatdn2        | 0 | 1 | 0.106713   | 10.6409   | 10.907    | No change |
| NM_001033464 | Efcab4b       | 0 | 1 | -0.886145  | 0.445933  | 0.196867  | No change |
| NM_001033468 | Gpr114        | 0 | 1 | -0.471108  | 0.123921  | 0.0765907 | No change |
| NM_001033469 | Foxr1         | 0 | 1 | -3.05607   | 0.33466   | 0         | No change |
| NM_001033473 | Odf3l2        | 0 | 1 | 1.11385    | 0         | 0.0575248 | No change |
| NM_001033478 | Fam47e        | 0 | 1 | 0.113855   | 0.277846  | 0.28621   | No change |
| NM_001033481 | Gm98          | 0 | 1 | -0.752879  | 0.373555  | 0.205227  | No change |
| NM_001033484 | Iqgap3        | 0 | 1 | -0.936771  | 0.343799  | 0.164426  | No change |
| NM_001033488 | Mfsd2b        | 0 | 1 | -0.395159  | 0.802863  | 0.574328  | No change |
| NM_001033489 | Rnf207        | 0 | 1 | 0.791927   | 0.67472   | 1.12943   | No change |
| NM_001033491 | Gm1965        | 0 | 1 | -0.208073  | 0.264489  | 0.204339  | No change |
| NM_001033493 | Gpr111        | 0 | 1 | 0.113855   | 0.0636853 | 0.0656025 | No change |
| NM_001033499 | Sh2d1b2       | 0 | 1 | 0.113855   | 0         | 0         | No change |
| NM_001033500 | Wdr72         | 0 | 1 | 0.661343   | 0.507538  | 0.770467  | No change |
| NM_001033525 | Kcnk6         | 0 | 1 | -0.351809  | 0.971508  | 0.719841  | No change |
| NM_001033533 | Ccdc102a      | 0 | 1 | 0.34518    | 0.665471  | 0.810141  | No change |
| NM_001033534 | Layn          | 0 | 1 | -0.0329866 | 1.17065   | 1.08531   | No change |
| NM_001033535 | Tnfaip8l3     | 0 | 1 | 1.11385    | 0.156613  | 0.354922  | No change |
| NM_001033538 | Cass4         | 0 | 1 | 0.229332   | 0.205474  | 0.230901  | No change |
| NM_001033541 | Gm5127        | 0 | 1 | 1.11385    | 0         | 0.0396854 | No change |
| NM_001033606 | Acsl3         | 0 | 1 | 0.176743   | 7.37172   | 7.93281   | No change |
| NM_001033621 | Myot          | 0 | 1 | -0.208073  | 0.126313  | 0.0975863 | No change |
| NM_001033632 | Ifitm6        | 0 | 1 | 0.92121    | 0.386467  | 0.796203  | No change |
| NM_001033638 | Crxos1        | 0 | 1 | 0.113855   | 0         | 0         | No change |
| NM_001033654 | Pus10         | 0 | 1 | -0.244078  | 7.7656    | 6.2368    | No change |
| NM_001033711 | Evi2a         | 0 | 1 | 0.333421   | 2.18549   | 2.6265    | No change |
| NM_001033767 | Gm4951        | 0 | 1 | 0.144228   | 1.21068   | 1.27424   | No change |
| NM_001033776 | Vrtn          | 0 | 1 | -2.47111   | 0.115081  | 0         | No change |
| NM_001033779 | Gm5544        | 0 | 1 | 0.113855   | 0.469313  | 0.483441  | No change |
| NM_001033780 | I830077J02Rik | 0 | 1 | 0.113855   | 0.784536  | 0.808154  | No change |
| NM_001033783 | Gm5615        | 0 | 1 | 0.113855   | 0         | 0         | No change |
| NM_001033786 | 4930428E23Rik | 0 | 1 | -1.47111   | 1.0905    | 0.306363  | No change |
| NM_001033789 | Gm5820        | 0 | 1 | 0.413415   | 0.382403  | 0.492393  | No change |
| NM_001033790 | B020004J07Rik | 0 | 1 | -0.471108  | 0.388163  | 0.254449  | No change |
| NM_001033791 | Gm12888       | 0 | 1 | -2.20807   | 0.236047  | 0         | No change |
| NM_001033793 | Ubtfl1        | 0 | 1 | -3.05607   | 0.211271  | 0         | No change |
| NM_001033795 | Zcchc16       | 0 | 1 | -0.748642  | 0.364382  | 0.197554  | No change |
| NM_001033805 | G630016D24Rik | 0 | 1 | 0.3065     | 2.32878   | 2.74994   | No change |
| NM_001033819 | 9130409I23Rik | 0 | 1 | 0.113855   | 0         | 0         | No change |
| NM_001033851 | Cpne8         | 0 | 1 | -0.301183  | 2.68816   | 2.05117   | No change |

|              |               |   |   |            |           |           |           |
|--------------|---------------|---|---|------------|-----------|-----------|-----------|
| NM_001033875 | Ctrc          | 0 | 1 | 0.113855   | 0         | 0         | No change |
| NM_001033876 | Kcnk9         | 0 | 1 | 0.113855   | 0         | 0         | No change |
| NM_001033878 | Vmn2r66       | 0 | 1 | 0.113855   | 0         | 0         | No change |
| NM_001033904 | Khdc1c        | 0 | 1 | 0.113855   | 0         | 0         | No change |
| NM_001033922 | Trem14        | 0 | 1 | -1.47111   | 0.0805699 | 0         | No change |
| NM_001033954 | Calca         | 0 | 1 | -0.471108  | 0.140227  | 0.0722243 | No change |
| NM_001033960 | Rabgap1       | 0 | 1 | 0.147252   | 7.00547   | 7.38576   | No change |
| NM_001033978 | H2-Eb2        | 0 | 1 | -1.47111   | 0.0412384 | 0         | No change |
| NM_001033981 | Hbq1b         | 0 | 1 | -0.471108  | 0.186345  | 0.0959772 | No change |
| NM_001033983 | 7420426K07Rik | 0 | 1 | 0.113855   | 0         | 0         | No change |
| NM_001034013 | Accn1         | 0 | 1 | 0.265858   | 0.210951  | 0.244464  | No change |
| NM_001034029 | Il17re        | 0 | 1 | -0.301183  | 1.13829   | 0.869964  | No change |
| NM_001034060 | Rufy4         | 0 | 1 | -2.20807   | 0.12089   | 0         | No change |
| NM_001034097 | BC096441      | 0 | 1 | -0.2301    | 3.05589   | 2.47334   | No change |
| NM_001034101 | Gm13119       | 0 | 1 | 0.113855   | 0         | 0         | No change |
| NM_001034857 | C330019L16Rik | 0 | 1 | 0.182296   | 3.52187   | 3.80486   | No change |
| NM_001034860 | Gm4858        | 0 | 1 | 0.113855   | 0         | 0         | No change |
| NM_001034862 | Erich1        | 0 | 1 | -0.263215  | 4.3696    | 3.45542   | No change |
| NM_001034863 | Tmem136       | 0 | 1 | 1.29828    | 0.199123  | 0.492281  | No change |
| NM_001034868 | Mrgprx2       | 0 | 1 | 0.113855   | 0         | 0         | No change |
| NM_001034872 | Gm853         | 0 | 1 | 0.113855   | 0         | 0         | No change |
| NM_001034873 | Ksr2          | 0 | 1 | 0.902351   | 0.305269  | 0.566026  | No change |
| NM_001034874 | Shisa6        | 0 | 1 | -1.6935    | 0.186171  | 0.0479438 | No change |
| NM_001034875 | Gm1006        | 0 | 1 | -0.886145  | 0.0329517 | 0         | No change |
| NM_001034877 | Gm5155        | 0 | 1 | 0.113855   | 0         | 0         | No change |
| NM_001034885 | Pnpla1        | 0 | 1 | 0.3023     | 0.652934  | 0.768674  | No change |
| NM_001034891 | 2210404J11Rik | 0 | 1 | 0.0943586  | 6.5282    | 6.63385   | No change |
| NM_001034894 | Foxr2         | 0 | 1 | 0.113855   | 0.0217247 | 0.0223787 | No change |
| NM_001034895 | Zfr2          | 0 | 1 | 0.0248498  | 2.41975   | 2.34218   | No change |
| NM_001034896 | Tmem92-ps     | 0 | 1 | 0.113855   | 0         | 0         | No change |
| NM_001034898 | Ms4a15        | 0 | 1 | -1.20807   | 0.162739  | 0.0419095 | No change |
| NM_001034903 | Gm5887        | 0 | 1 | 1.28378    | 0.186179  | 0.511423  | No change |
| NM_001034907 | Zc3h12b       | 0 | 1 | 0.872847   | 0.248534  | 0.448027  | No change |
| NM_001034909 | Gm6034        | 0 | 1 | -0.301183  | 0.128034  | 0.0879253 | No change |
| NM_001035123 | Setd6         | 0 | 1 | 0.351546   | 2.75598   | 3.35512   | No change |
| NM_001036740 | B3gnt8        | 0 | 1 | 0.294427   | 1.37023   | 1.60617   | No change |
| NM_001037127 | Musk          | 0 | 1 | 0.961852   | 0.183295  | 0.356647  | No change |
| NM_001037168 | Psg27         | 0 | 1 | 0.113855   | 0         | 0         | No change |
| NM_001037294 | Alpk2         | 0 | 1 | -0.886145  | 0.0865512 | 0.0396252 | No change |
| NM_001037321 | Fbxo40        | 0 | 1 | -0.301183  | 0.0830337 | 0.0570222 | No change |
| NM_001037493 | Slc41a3       | 0 | 1 | 0.222496   | 11.0334   | 12.257    | No change |
| NM_001037634 | Plac1l        | 0 | 1 | 0.113855   | 0         | 0         | No change |
| NM_001037707 | Zfp27         | 0 | 1 | 0.28378    | 2.98204   | 3.45834   | No change |
| NM_001037712 | Kcnh6         | 0 | 1 | 0.573286   | 0.170996  | 0.251633  | No change |
| NM_001037713 | Xaf1          | 0 | 1 | -0.336807  | 1.07302   | 0.801362  | No change |
| NM_001037717 | Slc38a6       | 0 | 1 | -0.264657  | 1.44245   | 1.13395   | No change |
| NM_001037722 | Adam15        | 0 | 1 | 0.180007   | 7.9276    | 8.55055   | No change |
| NM_001037727 | Arhgap25      | 0 | 1 | -0.156234  | 0.984711  | 0.836843  | No change |
| NM_001037737 | Arnt          | 0 | 1 | 0.181832   | 3.62103   | 3.91079   | No change |
| NM_001037742 | 1110034B05Rik | 0 | 1 | 0.0451421  | 4.19243   | 4.11541   | No change |
| NM_001037747 | Card9         | 0 | 1 | 0.515217   | 2.24955   | 3.07485   | No change |
| NM_001037756 | Brms1l        | 0 | 1 | -0.0308803 | 5.94807   | 5.5396    | No change |
| NM_001037757 | ORF19         | 0 | 1 | 0.0242176  | 3.98314   | 3.85438   | No change |
| NM_001037758 | Btrc          | 0 | 1 | -0.0680253 | 5.66358   | 5.14171   | No change |
| NM_001037800 | Cd209b        | 0 | 1 | 0.85082    | 0.150362  | 0.309778  | No change |
| NM_001037801 | Cd6           | 0 | 1 | -0.623111  | 0.453948  | 0.270724  | No change |
| NM_001037810 | Spn           | 0 | 1 | -0.264657  | 0.566993  | 0.438047  | No change |
| NM_001037822 | Krtap5-5      | 0 | 1 | 0.113855   | 0         | 0         | No change |
| NM_001037842 | Cml3          | 0 | 1 | -0.886145  | 0.113692  | 0.039038  | No change |
| NM_001037859 | Csf1r         | 0 | 1 | 0.266502   | 4.01072   | 4.59462   | No change |
| NM_001037906 | Nell1         | 0 | 1 | -0.0381483 | 0.223057  | 0.204242  | No change |
| NM_001037907 | Ripply2       | 0 | 1 | 0.113855   | 0         | 0         | No change |
| NM_001037909 | C130026I21Rik | 0 | 1 | 0.113855   | 0.480132  | 0.494585  | No change |
| NM_001037915 | Ripply1       | 0 | 1 | 0.85082    | 0.205281  | 0.422922  | No change |
| NM_001037917 | Gm6377        | 0 | 1 | 0.435783   | 0.17417   | 0.230674  | No change |
| NM_001037918 | Lipt1         | 0 | 1 | -0.361483  | 2.50984   | 1.84671   | No change |
| NM_001037922 | Gm6531        | 0 | 1 | -2.47111   | 0.145375  | 0         | No change |
| NM_001037929 | Gm14092       | 0 | 1 | -0.0381483 | 0.345775  | 0.316608  | No change |
| NM_001037931 | Gm6878        | 0 | 1 | -1.47111   | 0.0690713 | 0         | No change |
| NM_001037932 | Gm11437       | 0 | 1 | -1.47111   | 0.113599  | 0         | No change |
| NM_001037937 | Deptor        | 0 | 1 | 0.508134   | 1.45722   | 1.97969   | No change |
| NM_001037939 | Bglap         | 0 | 1 | 0.698817   | 0.595666  | 1.02266   | No change |
| NM_001037987 | Edil3         | 0 | 1 | -1.30118   | 0.0910509 | 0.0267977 | No change |
| NM_001038010 | Kat2a         | 0 | 1 | -0.236278  | 6.77475   | 5.46979   | No change |
| NM_001038231 | Banf1         | 0 | 1 | 0.227313   | 30.86     | 34.3978   | No change |
| NM_001038499 | Arsi          | 0 | 1 | 0.113855   | 0.121416  | 0.125071  | No change |

|              |               |   |   |            |           |           |           |
|--------------|---------------|---|---|------------|-----------|-----------|-----------|
| NM_001038500 | Gm6084        | 0 | 1 | -0.886145  | 0.0664375 | 0         | No change |
| NM_001038590 | Cldn19        | 0 | 1 | 0.113855   | 0         | 0         | No change |
| NM_001038604 | Clec5a        | 0 | 1 | 0.561314   | 0.182442  | 0.263108  | No change |
| NM_001038607 | Kcnh1         | 0 | 1 | 0.508134   | 0.335537  | 0.457462  | No change |
| NM_001038609 | Mapt          | 0 | 1 | 0.147643   | 2.71834   | 2.86684   | No change |
| NM_001038612 | Olfm1         | 0 | 1 | -0.623111  | 0.598508  | 0.342514  | No change |
| NM_001038641 | 2210009G21Rik | 0 | 1 | -0.283293  | 4.5644    | 3.56427   | No change |
| NM_001038642 | Ets1          | 0 | 1 | 0.293833   | 2.06218   | 2.40849   | No change |
| NM_001038655 | Gng7          | 0 | 1 | 0.184244   | 0.793584  | 0.859396  | No change |
| NM_001038658 | Faim2         | 0 | 1 | 0.285466   | 1.461     | 1.69711   | No change |
| NM_001038660 | Slc7a15       | 0 | 1 | -1.20807   | 0.427564  | 0.146812  | No change |
| NM_001038664 | Gngt2         | 0 | 1 | 0.435783   | 1.34495   | 1.76329   | No change |
| NM_001038676 | Gm4745        | 0 | 1 | 0.113855   | 0         | 0         | No change |
| NM_001038697 | Gm5635        | 0 | 1 | -2.6935    | 0.570474  | 0         | No change |
| NM_001038699 | Fn3k          | 0 | 1 | 0.933283   | 0.289182  | 0.539922  | No change |
| NM_001038703 | Gpr146        | 0 | 1 | 0.390065   | 1.81588   | 2.26891   | No change |
| NM_001038845 | P2rx7         | 0 | 1 | 0.396255   | 1.5364    | 1.93436   | No change |
| NM_001038996 | Try10         | 0 | 1 | 0.113855   | 0         | 0         | No change |
| NM_001038997 | Gm5771        | 0 | 1 | 0.113855   | 0         | 0         | No change |
| NM_001039038 | Nhlrc4        | 0 | 1 | 0.113855   | 0.292964  | 0.301784  | No change |
| NM_001039042 | Klk13         | 0 | 1 | 0.113855   | 0         | 0         | No change |
| NM_001039047 | Trim58        | 0 | 1 | 0.113855   | 0         | 0         | No change |
| NM_001039048 | Trim63        | 0 | 1 | -0.208073  | 0.332575  | 0.266456  | No change |
| NM_001039059 | Kihl15        | 0 | 1 | -0.0893595 | 3.02143   | 2.70046   | No change |
| NM_001039071 | Ldb3          | 0 | 1 | -0.166253  | 0.229725  | 0.192271  | No change |
| NM_001039077 | Prosc         | 0 | 1 | 0.320306   | 4.96087   | 5.90403   | No change |
| NM_001039079 | Prkcz         | 0 | 1 | 0.368276   | 2.36738   | 2.91234   | No change |
| NM_001039094 | Negr1         | 0 | 1 | 0.58334    | 0.167766  | 0.244824  | No change |
| NM_001039103 | Rasa4         | 0 | 1 | 0.28378    | 0.577427  | 0.672394  | No change |
| NM_001039105 | Kcnrg         | 0 | 1 | 0.698817   | 0.407085  | 0.670944  | No change |
| NM_001039118 | Klra33        | 0 | 1 | 0.113855   | 0         | 0         | No change |
| NM_001039120 | Defb26        | 0 | 1 | 0.0207454  | 5.0627    | 4.88223   | No change |
| NM_001039121 | Defb43        | 0 | 1 | -0.0683485 | 9.90733   | 8.97387   | No change |
| NM_001039124 | Kncn          | 0 | 1 | 1.69882    | 0         | 0.15098   | No change |
| NM_001039128 | Tas2r122      | 0 | 1 | 0.113855   | 0         | 0         | No change |
| NM_001039149 | Cd226         | 0 | 1 | 0.413415   | 0.389346  | 0.501334  | No change |
| NM_001039150 | Cd44          | 0 | 1 | 0.372942   | 0.827707  | 1.02315   | No change |
| NM_001039153 | Tctn1         | 0 | 1 | 0.0911942  | 13.0547   | 13.2376   | No change |
| NM_001039154 | Cdh8          | 0 | 1 | 0.113855   | 0         | 0         | No change |
| NM_001039155 | Triobp        | 0 | 1 | -0.886145  | 0.0915326 | 0.0377152 | No change |
| NM_001039173 | Dok6          | 0 | 1 | -0.886145  | 0.0699728 | 0         | No change |
| NM_001039175 | Elovl1        | 0 | 1 | 0.171188   | 3.21389   | 3.44669   | No change |
| NM_001039181 | Npr3          | 0 | 1 | -0.264657  | 0.775149  | 0.611825  | No change |
| NM_001039192 | Gmfg          | 0 | 1 | -0.14918   | 1.20527   | 1.02246   | No change |
| NM_001039201 | Hdhd2         | 0 | 1 | -0.0512044 | 6.53464   | 6.00035   | No change |
| NM_001039214 | Mex3c         | 0 | 1 | -0.118141  | 17.577    | 15.4139   | No change |
| NM_001039218 | Spink14       | 0 | 1 | 0.113855   | 0         | 0         | No change |
| NM_001039219 | Gm6086        | 0 | 1 | 0.113855   | 0.1717    | 0.176869  | No change |
| NM_001039222 | Gm6289        | 0 | 1 | 0.113855   | 0         | 0         | No change |
| NM_001039238 | Dcpp2         | 0 | 1 | 0.113855   | 0         | 0         | No change |
| NM_001039243 | Gm7092        | 0 | 1 | -0.108538  | 0.459514  | 0.394456  | No change |
| NM_001039351 | Nolc1         | 0 | 1 | 0.202962   | 6.9117    | 7.57464   | No change |
| NM_001039364 | Mobp          | 0 | 1 | 1.11385    | 0         | 0.0223857 | No change |
| NM_001039368 | Polr2k        | 0 | 1 | 0.604841   | 4.05322   | 5.91493   | No change |
| NM_001039385 | Vgf           | 0 | 1 | -1.88615   | 0.0818953 | 0         | No change |
| NM_001039388 | Wdr37         | 0 | 1 | -0.125073  | 12.3236   | 10.7547   | No change |
| NM_001039474 | Tcerg1        | 0 | 1 | -0.180179  | 7.27121   | 6.10606   | No change |
| NM_001039482 | Kihl20        | 0 | 1 | 0.0338327  | 4.782     | 4.65921   | No change |
| NM_001039484 | Kcnj10        | 0 | 1 | -1.37157   | 0.167562  | 0.0531097 | No change |
| NM_001039485 | Fam38b        | 0 | 1 | 0.483089   | 0.149472  | 0.200833  | No change |
| NM_001039493 | Plekhm3       | 0 | 1 | 0.24086    | 2.64543   | 2.97662   | No change |
| NM_001039502 | Krtap1-4      | 0 | 1 | 0.113855   | 0         | 0         | No change |
| NM_001039514 | Dhps          | 0 | 1 | -0.04421   | 5.49381   | 5.06633   | No change |
| NM_001039518 | B020018G12Rik | 0 | 1 | 0.193082   | 6.39242   | 6.9596    | No change |
| NM_001039532 | Zfp784        | 0 | 1 | 0.0406058  | 3.24757   | 3.17807   | No change |
| NM_001039536 | Pigl          | 0 | 1 | -0.203335  | 3.15448   | 2.59955   | No change |
| NM_001039537 | Lif           | 0 | 1 | 1.49237    | 0.0733996 | 0.226828  | No change |
| NM_001039544 | Mup3          | 0 | 1 | 0.113855   | 0         | 0         | No change |
| NM_001039545 | Myh2          | 0 | 1 | -0.471108  | 0.022914  | 0.0118019 | No change |
| NM_001039551 | Cnmn3         | 0 | 1 | 0.376889   | 1.56984   | 1.94323   | No change |
| NM_001039555 | Cyp2c68       | 0 | 1 | 0.435783   | 0.11819   | 0.162331  | No change |
| NM_001039560 | Gcnt7         | 0 | 1 | -0.14918   | 1.8522    | 1.58458   | No change |
| NM_001039594 | Lce3a         | 0 | 1 | 0.113855   | 0         | 0         | No change |
| NM_001039595 | Gm13043       | 0 | 1 | 0.113855   | 0         | 0         | No change |
| NM_001039645 | Asphd1        | 0 | 1 | -1.47111   | 0.672712  | 0.138593  | No change |
| NM_001039646 | Gbp10         | 0 | 1 | -0.0342438 | 1.60009   | 1.48547   | No change |



|              |               |   |   |            |           |           |           |
|--------------|---------------|---|---|------------|-----------|-----------|-----------|
| NM_001039647 | Gbp11         | 0 | 1 | -0.0787903 | 0.180152  | 0.159064  | No change |
| NM_001039652 | Oprm1         | 0 | 1 | -0.0381483 | 0.23768   | 0.217631  | No change |
| NM_001039653 | Lhx3          | 0 | 1 | -2.20807   | 0.126255  | 0         | No change |
| NM_001039666 | Krt40         | 0 | 1 | 1.11385    | 0         | 0.0543871 | No change |
| NM_001039676 | Slc39a2       | 0 | 1 | -0.14918   | 0.149299  | 0.123035  | No change |
| NM_001039678 | Prhoxnb       | 0 | 1 | 0.113855   | 0         | 0         | No change |
| NM_001039684 | Mks1          | 0 | 1 | -0.111705  | 2.21014   | 1.94276   | No change |
| NM_001039688 | Rhox4a        | 0 | 1 | -0.886145  | 0.0782188 | 0         | No change |
| NM_001039689 | Rhox4c        | 0 | 1 | 0.113855   | 0         | 0         | No change |
| NM_001039695 | Rhox4d        | 0 | 1 | 0.113855   | 0         | 0         | No change |
| NM_001039696 | Rhox4f        | 0 | 1 | 0.113855   | 0         | 0         | No change |
| NM_001039698 | Rhox4g        | 0 | 1 | 0.113855   | 0         | 0         | No change |
| NM_001039701 | Il1rn         | 0 | 1 | -0.471108  | 0.056204  | 0.028948  | No change |
| NM_001039710 | Coq10b        | 0 | 1 | -0.111705  | 15.2416   | 13.422    | No change |
| NM_001039720 | 9030619P08Rik | 0 | 1 | 0.113855   | 0         | 0         | No change |
| NM_001039824 | Fdx1l         | 0 | 1 | 0.342386   | 11.8531   | 14.3215   | No change |
| NM_001040085 | Syt12         | 0 | 1 | -0.0868425 | 1.39754   | 1.25019   | No change |
| NM_001040089 | Rhox3f        | 0 | 1 | -2.88615   | 0.585655  | 0         | No change |
| NM_001040106 | Aak1          | 0 | 1 | 0.136869   | 3.58102   | 3.7482    | No change |
| NM_001040397 | Filip1l       | 0 | 1 | 0.113855   | 3.07313   | 3.16564   | No change |
| NM_001040403 | Flot2         | 0 | 1 | -0.158348  | 5.87675   | 5.00803   | No change |
| NM_001040426 | Thsd4         | 0 | 1 | 0.254717   | 0.610091  | 0.693751  | No change |
| NM_001040434 | Rgag1         | 0 | 1 | 1.11385    | 0.0168626 | 0.0521106 | No change |
| NM_001040461 | Dear1         | 0 | 1 | -0.208073  | 4.51345   | 3.69211   | No change |
| NM_001040682 | Clmn          | 0 | 1 | 0.0177892  | 9.74726   | 9.39349   | No change |
| NM_001040689 | Rspo4         | 0 | 1 | 0.113855   | 0.0293939 | 0.0302788 | No change |
| NM_001040696 | Nlrp1b        | 0 | 1 | -0.71622   | 0.787586  | 0.448801  | No change |
| NM_001040699 | Mttr7         | 0 | 1 | 0.313164   | 3.80217   | 4.49996   | No change |
| NM_001040700 | BC051019      | 0 | 1 | -0.196485  | 1.07662   | 0.887221  | No change |
| NM_001042411 | Lepre1        | 0 | 1 | -0.358898  | 1.65173   | 1.21895   | No change |
| NM_001042438 | Zhx1          | 0 | 1 | 0.0430394  | 20.365    | 19.9725   | No change |
| NM_001042451 | Snca          | 0 | 1 | 0.528892   | 0.109066  | 0.168523  | No change |
| NM_001042484 | Golga7        | 0 | 1 | 0.12703    | 25.0327   | 26.0232   | No change |
| NM_001042485 | Tmem183a      | 0 | 1 | -0.0495767 | 18.8871   | 17.3695   | No change |
| NM_001042501 | Fam133b       | 0 | 1 | 0.0732128  | 9.77881   | 9.79251   | No change |
| NM_001042558 | Apaf1         | 0 | 1 | 0.364262   | 1.61558   | 1.98172   | No change |
| NM_001042591 | Arrdc3        | 0 | 1 | -0.116099  | 23.3503   | 20.5067   | No change |
| NM_001042605 | Cd74          | 0 | 1 | -0.11349   | 26.3011   | 23.1355   | No change |
| NM_001042606 | Sstr2         | 0 | 1 | -0.6935    | 0.376719  | 0.19403   | No change |
| NM_001042612 | Nlrp9c        | 0 | 1 | 0.113855   | 0         | 0         | No change |
| NM_001042615 | Htra3         | 0 | 1 | -0.269474  | 0.914109  | 0.714338  | No change |
| NM_001042620 | Dhx15         | 0 | 1 | 0.0955399  | 40.736    | 41.4327   | No change |
| NM_001042670 | Gm9897        | 0 | 1 | -0.138911  | 2.80198   | 2.41402   | No change |
| NM_001042673 | Fancc         | 0 | 1 | -0.385378  | 3.21186   | 2.33411   | No change |
| NM_001042674 | Rbpms         | 0 | 1 | 0.270131   | 6.70399   | 7.69924   | No change |
| NM_001042714 | Ankdd1b       | 0 | 1 | 0.0329348  | 1.13527   | 1.10448   | No change |
| NM_001042725 | Calcr         | 0 | 1 | 0.113855   | 0.14055   | 0.144782  | No change |
| NM_001042752 | Neo1          | 0 | 1 | 0.0282945  | 9.9316    | 9.64092   | No change |
| NM_001042760 | Slc22a18      | 0 | 1 | -0.634606  | 1.85065   | 1.11592   | No change |
| NM_001042767 | Proc          | 0 | 1 | -0.594682  | 2.93163   | 1.83024   | No change |
| NM_001043228 | Dntt          | 0 | 1 | -1.47111   | 0.0673362 | 0         | No change |
| NM_001043317 | Cd22          | 0 | 1 | -0.71622   | 0.255161  | 0.140183  | No change |
| NM_001043354 | Rorb          | 0 | 1 | 1.11385    | 0.0209288 | 0.0646766 | No change |
| NM_001044380 | Hhip1         | 0 | 1 | -0.0116761 | 0.294289  | 0.275589  | No change |
| NM_001044382 | Prok1         | 0 | 1 | 1.11385    | 0         | 0.173408  | No change |
| NM_001044720 | Abcc9         | 0 | 1 | 0.357524   | 1.15241   | 1.40729   | No change |
| NM_001044741 | Cacnb3        | 0 | 1 | 0.0289659  | 0.887476  | 0.860416  | No change |
| NM_001045481 | Ifi203        | 0 | 1 | -0.208073  | 1.42074   | 1.16685   | No change |
| NM_001045483 | Mapk1ip1      | 0 | 1 | -0.0644824 | 7.81988   | 7.11315   | No change |
| NM_001045484 | Mef2b         | 0 | 1 | -2.6935    | 0.318718  | 0         | No change |
| NM_001045486 | Zfp180        | 0 | 1 | 0.251797   | 6.13908   | 6.96052   | No change |
| NM_001045515 | Synj1         | 0 | 1 | -0.0483389 | 4.38314   | 4.03389   | No change |
| NM_001045523 | Bahd1         | 0 | 1 | 0.160776   | 3.79313   | 4.03703   | No change |
| NM_001045525 | Cyb5d1        | 0 | 1 | 0.0610029  | 12.5556   | 12.465    | No change |
| NM_001045526 | A430084P05Rik | 0 | 1 | 0.113855   | 0.330298  | 0.340242  | No change |
| NM_001045529 | Morc3         | 0 | 1 | -0.171547  | 11.6905   | 9.87792   | No change |
| NM_001045530 | Ccnjl         | 0 | 1 | 0.146276   | 1.12156   | 1.18219   | No change |
| NM_001045532 | Prl2c1        | 0 | 1 | 0.113855   | 0         | 0         | No change |
| NM_001045535 | Serpnb6e      | 0 | 1 | -1.6935    | 0.606431  | 0.144159  | No change |
| NM_001045540 | Gm12185       | 0 | 1 | -0.734142  | 0.105916  | 0.0545524 | No change |
| NM_001045542 | Gm12253       | 0 | 1 | -0.886145  | 0.051396  | 0         | No change |
| NM_001045544 | Vmn1r204      | 0 | 1 | 0.113855   | 0         | 0         | No change |
| NM_001045550 | Mup2          | 0 | 1 | 0.113855   | 0         | 0         | No change |
| NM_001045807 | Rbm15         | 0 | 1 | 0.0847575  | 12.7877   | 12.9092   | No change |
| NM_001046637 | Snrpa         | 0 | 1 | -0.150766  | 19.6265   | 16.8199   | No change |
| NM_001048054 | Dusp16        | 0 | 1 | 0.157041   | 6.07562   | 6.44923   | No change |

|              |               |   |   |            |           |           |           |
|--------------|---------------|---|---|------------|-----------|-----------|-----------|
| NM_001048143 | Mon1b         | 0 | 1 | 0.0613874  | 2.80556   | 2.78627   | No change |
| NM_001048147 | Ghr           | 0 | 1 | 0.320306   | 2.47508   | 2.95215   | No change |
| NM_001048148 | Zgpat         | 0 | 1 | 0.267826   | 9.85489   | 11.2988   | No change |
| NM_001048196 | Krtap4-1      | 0 | 1 | 0.113855   | 0         | 0         | No change |
| NM_001048207 | Gypc          | 0 | 1 | -0.172449  | 1.56506   | 1.31606   | No change |
| NM_001048219 | Nlrp9a        | 0 | 1 | 0.698817   | 0.0211704 | 0.0436154 | No change |
| NM_001048227 | Dbnnd2        | 0 | 1 | -0.0536019 | 1.40282   | 1.28449   | No change |
| NM_001076679 | Gm9733        | 0 | 1 | 0.113855   | 0         | 0         | No change |
| NM_001076790 | Serpnb6d      | 0 | 1 | -1.47111   | 0.0950142 | 0         | No change |
| NM_001077202 | Hs6st2        | 0 | 1 | -1.73414   | 0.280953  | 0.0680967 | No change |
| NM_001077348 | Plin5         | 0 | 1 | 0.435783   | 3.04382   | 3.92832   | No change |
| NM_001077359 | Git2          | 0 | 1 | 0.145664   | 4.41219   | 4.64666   | No change |
| NM_001077398 | Ldb2          | 0 | 1 | 0.140327   | 1.40874   | 1.47853   | No change |
| NM_001077403 | Nrp2          | 0 | 1 | -0.102637  | 1.25135   | 1.10792   | No change |
| NM_001077410 | Gimap8        | 0 | 1 | -0.0116761 | 1.35419   | 1.27707   | No change |
| NM_001077421 | Sbpl          | 0 | 1 | 0.113855   | 0         | 0         | No change |
| NM_001077424 | A4gnt         | 0 | 1 | 0.113855   | 0         | 0         | No change |
| NM_001077425 | Cntnap5a      | 0 | 1 | -2.20807   | 0.160214  | 0.0183374 | No change |
| NM_001077496 | Evi2b         | 0 | 1 | 0.130157   | 1.71813   | 1.7902    | No change |
| NM_001077508 | Tnfrsf9       | 0 | 1 | -3.05607   | 0.278911  | 0         | No change |
| NM_001077632 | Nkx2-2        | 0 | 1 | 0.113855   | 0         | 0         | No change |
| NM_001077633 | Dcpp3         | 0 | 1 | 0.113855   | 0         | 0         | No change |
| NM_001077636 | Pigw          | 0 | 1 | 0.449458   | 1.26546   | 1.65329   | No change |
| NM_001077696 | Hdac5         | 0 | 1 | 0.0933907  | 9.10155   | 9.24323   | No change |
| NM_001077713 | Acn9          | 0 | 1 | 0.34518    | 5.70215   | 6.91804   | No change |
| NM_001079690 | Slc12a1       | 0 | 1 | -1.88615   | 0.0450213 | 0         | No change |
| NM_001079822 | Tcf7l1        | 0 | 1 | 0.113855   | 0.876168  | 0.902545  | No change |
| NM_001079830 | Trim33        | 0 | 1 | -0.029598  | 9.59592   | 8.94843   | No change |
| NM_001079849 | Paip1         | 0 | 1 | 0.159338   | 8.77615   | 9.33041   | No change |
| NM_001079865 | Ces2f         | 0 | 1 | 1.69882    | 0.0382298 | 0.196903  | No change |
| NM_001079883 | Bcl11b        | 0 | 1 | 0.313164   | 0.228703  | 0.271833  | No change |
| NM_001079932 | Trim72        | 0 | 1 | 0.34832    | 0.451087  | 0.551791  | No change |
| NM_001079933 | Defa26        | 0 | 1 | 0.113855   | 0         | 0         | No change |
| NM_001080127 | Rnps1         | 0 | 1 | -0.243908  | 16.5327   | 13.2813   | No change |
| NM_001080134 | Tmpo          | 0 | 1 | 0.257956   | 6.40699   | 7.29606   | No change |
| NM_001080381 | Fam65b        | 0 | 1 | 0.872847   | 0.244608  | 0.440951  | No change |
| NM_001080549 | Hdx           | 0 | 1 | -1.53822   | 0.343476  | 0.10109   | No change |
| NM_001080708 | Fam65c        | 0 | 1 | 1.11385    | 0.0949819 | 0.220143  | No change |
| NM_001080710 | Sdr16c6       | 0 | 1 | -2.20807   | 0.236247  | 0         | No change |
| NM_001080711 | Dfnb59        | 0 | 1 | 0.573286   | 0.400206  | 0.588933  | No change |
| NM_001080712 | Gm7534        | 0 | 1 | -0.886145  | 0.0298088 | 0         | No change |
| NM_001080754 | Ambra1        | 0 | 1 | -0.182843  | 8.05699   | 6.7541    | No change |
| NM_001080769 | Uhrf1bp1      | 0 | 1 | -0.0622563 | 3.3191    | 3.02516   | No change |
| NM_001080771 | Prdm13        | 0 | 1 | 0.113855   | 0         | 0         | No change |
| NM_001080774 | Myo1c         | 0 | 1 | -0.207237  | 5.64475   | 4.65174   | No change |
| NM_001080776 | Gm1123        | 0 | 1 | 0.698817   | 0.0521264 | 0.107391  | No change |
| NM_001080809 | Cps1          | 0 | 1 | -0.886145  | 0.0148157 | 0         | No change |
| NM_001080810 | Zscan30       | 0 | 1 | -0.123184  | 3.31378   | 2.88017   | No change |
| NM_001080812 | Cib3          | 0 | 1 | 0.113855   | 0         | 0         | No change |
| NM_001080817 | Prdm10        | 0 | 1 | -0.471108  | 1.26789   | 0.863682  | No change |
| NM_001080924 | Znrf3         | 0 | 1 | 0.173892   | 3.89025   | 4.17813   | No change |
| NM_001080925 | Rapgef1       | 0 | 1 | 0.184244   | 0.31808   | 0.3449    | No change |
| NM_001080932 | Foxk2         | 0 | 1 | -0.0743489 | 13.4621   | 12.1697   | No change |
| NM_001080933 | Ankfn1        | 0 | 1 | 0.632322   | 1.12458   | 1.6733    | No change |
| NM_001080935 | B230217C12Rik | 0 | 1 | -0.734142  | 0.468918  | 0.241517  | No change |
| NM_001080940 | Gm6484        | 0 | 1 | 0.599282   | 0.322279  | 0.497972  | No change |
| NM_001080941 | Zfp429        | 0 | 1 | 0.541276   | 1.95593   | 2.72177   | No change |
| NM_001080942 | 9230107M04Rik | 0 | 1 | -0.594682  | 8.67874   | 5.41819   | No change |
| NM_001080943 | Zdhhc22       | 0 | 1 | 0.113855   | 0         | 0         | No change |
| NM_001080944 | Atp8b4        | 0 | 1 | -0.0381483 | 0.239495  | 0.220735  | No change |
| NM_001080945 | Nanogpd       | 0 | 1 | 0.113855   | 0         | 0         | No change |
| NM_001080968 | Golga2        | 0 | 1 | -0.0196075 | 11.3784   | 10.6839   | No change |
| NM_001080969 | Thg1l         | 0 | 1 | -0.298123  | 11.5784   | 8.9452    | No change |
| NM_001080971 | Tubb1         | 0 | 1 | 1.11385    | 0         | 0.0510604 | No change |
| NM_001080972 | Vmn1r194      | 0 | 1 | 0.113855   | 0         | 0         | No change |
| NM_001080979 | Tead4         | 0 | 1 | 0.961852   | 0.0945951 | 0.194886  | No change |
| NM_001081010 | Olf367-ps     | 0 | 1 | 0.113855   | 0         | 0         | No change |
| NM_001081013 | Rif           | 0 | 1 | 0.0535806  | 10.5942   | 10.4661   | No change |
| NM_001081014 | Dennd4c       | 0 | 1 | 0.0619537  | 6.97176   | 6.92742   | No change |
| NM_001081016 | Zc3h7b        | 0 | 1 | -0.100474  | 6.59732   | 5.85606   | No change |
| NM_001081017 | Unc79         | 0 | 1 | -0.400718  | 0.227857  | 0.161874  | No change |
| NM_001081021 | Zfp780b       | 0 | 1 | 0.120324   | 5.61489   | 5.80998   | No change |
| NM_001081027 | Kcnt2         | 0 | 1 | 0.528892   | 0.193738  | 0.272142  | No change |
| NM_001081033 | Pde11a        | 0 | 1 | 0.611354   | 0.391533  | 0.579773  | No change |
| NM_001081041 | 1110014N23Rik | 0 | 1 | 0.176364   | 7.15207   | 7.69481   | No change |
| NM_001081043 | Ptpn23        | 0 | 1 | 0.0534433  | 4.12724   | 4.07659   | No change |

|              |               |   |   |            |           |           |           |
|--------------|---------------|---|---|------------|-----------|-----------|-----------|
| NM_001081044 | Mylk2         | 0 | 1 | 0.765932   | 0.30733   | 0.511401  | No change |
| NM_001081045 | 1700081L11Rik | 0 | 1 | -0.10559   | 16.4809   | 14.5797   | No change |
| NM_001081050 | Pard3b        | 0 | 1 | 0.104866   | 1.32875   | 1.3602    | No change |
| NM_001081052 | Nhs           | 0 | 1 | -0.345577  | 0.777022  | 0.578761  | No change |
| NM_001081053 | Itga10        | 0 | 1 | -0.248715  | 0.110536  | 0.0853977 | No change |
| NM_001081054 | Qrs1          | 0 | 1 | 0.305475   | 6.191     | 7.28842   | No change |
| NM_001081057 | Tecpr2        | 0 | 1 | -0.11764   | 3.29328   | 2.88814   | No change |
| NM_001081060 | Slc9a3        | 0 | 1 | -0.0381483 | 0.251902  | 0.230654  | No change |
| NM_001081064 | Pdzd2         | 0 | 1 | -0.194141  | 2.8058    | 2.33362   | No change |
| NM_001081065 | Zfp707        | 0 | 1 | -0.221329  | 3.10855   | 2.53008   | No change |
| NM_001081066 | Dennd3        | 0 | 1 | 0.360948   | 1.18369   | 1.44964   | No change |
| NM_001081067 | A1bg          | 0 | 1 | -3.05607   | 0.305838  | 0         | No change |
| NM_001081070 | Pdia2         | 0 | 1 | 0.113855   | 0.202478  | 0.208573  | No change |
| NM_001081075 | 5730455O13Rik | 0 | 1 | 0.264921   | 7.62734   | 8.72995   | No change |
| NM_001081082 | Alpi          | 0 | 1 | -2.88615   | 0.208751  | 0         | No change |
| NM_001081085 | 2010317E24Rik | 0 | 1 | -0.0667174 | 0.357285  | 0.322036  | No change |
| NM_001081092 | Taf4a         | 0 | 1 | 0.137442   | 2.85265   | 2.98723   | No change |
| NM_001081094 | Znhit6        | 0 | 1 | -0.228251  | 2.205     | 1.78648   | No change |
| NM_001081097 | Grik3         | 0 | 1 | -0.400718  | 0.0709383 | 0.0487159 | No change |
| NM_001081101 | 4933407H18Rik | 0 | 1 | -0.0232854 | 7.54388   | 7.06542   | No change |
| NM_001081104 | Chrna9        | 0 | 1 | -1.54911   | 0.626297  | 0.179209  | No change |
| NM_001081105 | Rhoh          | 0 | 1 | 0.616355   | 0.154561  | 0.231584  | No change |
| NM_001081107 | Helq          | 0 | 1 | -0.147411  | 3.06135   | 2.62792   | No change |
| NM_001081110 | Cd8a          | 0 | 1 | -0.0877791 | 0.489855  | 0.435792  | No change |
| NM_001081114 | Clip3         | 0 | 1 | -0.301183  | 0.570215  | 0.435097  | No change |
| NM_001081115 | Nccrp1        | 0 | 1 | 1.11385    | 0         | 0.0469222 | No change |
| NM_001081118 | Phrf1         | 0 | 1 | -0.062087  | 11.2826   | 10.2864   | No change |
| NM_001081120 | Fam89a        | 0 | 1 | -0.0787903 | 2.49093   | 2.23835   | No change |
| NM_001081123 | Arhgap36      | 0 | 1 | 0.265858   | 0.183463  | 0.212609  | No change |
| NM_001081125 | Gli2          | 0 | 1 | 0.290733   | 0.22857   | 0.267557  | No change |
| NM_001081126 | Gpr161        | 0 | 1 | 1.19186    | 0.28695   | 0.665073  | No change |
| NM_001081127 | Adamts14      | 0 | 1 | 0.0524543  | 0.30897   | 0.304434  | No change |
| NM_001081129 | Cntnap3       | 0 | 1 | -0.208073  | 0.200432  | 0.162223  | No change |
| NM_001081130 | Ogdhl         | 0 | 1 | 0.103586   | 2.82894   | 2.89329   | No change |
| NM_001081131 | Dhtkd1        | 0 | 1 | -0.306048  | 3.88388   | 2.98537   | No change |
| NM_001081136 | Awat1         | 0 | 1 | 0.113855   | 0         | 0         | No change |
| NM_001081137 | Sis           | 0 | 1 | 0.113855   | 0         | 0         | No change |
| NM_001081139 | Ankrd35       | 0 | 1 | -1.34558   | 0.171912  | 0.053126  | No change |
| NM_001081140 | Kcna10        | 0 | 1 | 0.113855   | 0         | 0         | No change |
| NM_001081141 | Gabbr2        | 0 | 1 | -0.945039  | 0.418367  | 0.197524  | No change |
| NM_001081142 | Kcnq4         | 0 | 1 | 0.113855   | 0.721344  | 0.743059  | No change |
| NM_001081143 | Gnat3         | 0 | 1 | 0.113855   | 0         | 0         | No change |
| NM_001081144 | Zfp518b       | 0 | 1 | 0.245699   | 2.10638   | 2.37843   | No change |
| NM_001081148 | Cyp2b23       | 0 | 1 | 0.670248   | 0.511039  | 0.789635  | No change |
| NM_001081150 | Lonrf1        | 0 | 1 | 0.3065     | 1.47189   | 1.73541   | No change |
| NM_001081151 | Gan           | 0 | 1 | 0.0385667  | 1.5242    | 1.48888   | No change |
| NM_001081152 | Npat          | 0 | 1 | 0.0574819  | 5.18879   | 5.13979   | No change |
| NM_001081153 | Unc13c        | 0 | 1 | -0.345577  | 0.276046  | 0.204381  | No change |
| NM_001081156 | Trnp1         | 0 | 1 | 0.472936   | 1.89612   | 2.51746   | No change |
| NM_001081157 | Lmod3         | 0 | 1 | 0.113855   | 0.0310852 | 0.032021  | No change |
| NM_001081158 | 1300001I01Rik | 0 | 1 | -0.032755  | 5.73137   | 5.33213   | No change |
| NM_001081160 | Mdga1         | 0 | 1 | 0.113855   | 0.027634  | 0.0284659 | No change |
| NM_001081162 | Slc4a11       | 0 | 1 | 0.628428   | 0.740256  | 1.09896   | No change |
| NM_001081165 | Fam26d        | 0 | 1 | 0.113855   | 0         | 0         | No change |
| NM_001081167 | B3gnt6        | 0 | 1 | -1.10854   | 0.176661  | 0.0606599 | No change |
| NM_001081173 | Lrch2         | 0 | 1 | 0.113855   | 0.250555  | 0.258098  | No change |
| NM_001081174 | 6330545A04Rik | 0 | 1 | -0.471108  | 0.146568  | 0.07549   | No change |
| NM_001081175 | Itpkb         | 0 | 1 | 0.180969   | 5.72463   | 6.17844   | No change |
| NM_001081177 | Kif13b        | 0 | 1 | 0.113855   | 3.91813   | 4.03608   | No change |
| NM_001081179 | Heatr5b       | 0 | 1 | -0.0733482 | 6.12804   | 5.54297   | No change |
| NM_001081182 | Atp8b2        | 0 | 1 | 0.0284193  | 9.76068   | 9.47565   | No change |
| NM_001081183 | 1110037F02Rik | 0 | 1 | -0.0433926 | 11.0882   | 10.2414   | No change |
| NM_001081184 | BC057079      | 0 | 1 | 0.0891928  | 2.11628   | 2.14283   | No change |
| NM_001081185 | Finc          | 0 | 1 | -0.438686  | 0.828773  | 0.579591  | No change |
| NM_001081186 | D630042F21Rik | 0 | 1 | -0.886145  | 0.024241  | 0         | No change |
| NM_001081187 | Htra4         | 0 | 1 | 0.599282   | 0.127818  | 0.197499  | No change |
| NM_001081188 | Exosc7        | 0 | 1 | 0.0753807  | 5.04047   | 5.05375   | No change |
| NM_001081189 | Uppt          | 0 | 1 | 0.573286   | 1.94288   | 2.77609   | No change |
| NM_001081190 | Gabbr3        | 0 | 1 | -0.886145  | 0.047866  | 0         | No change |
| NM_001081191 | Emi5          | 0 | 1 | -0.0607295 | 11.4551   | 10.4542   | No change |
| NM_001081192 | Hcn4          | 0 | 1 | 0.865927   | 0.330298  | 0.585972  | No change |
| NM_001081193 | Lemd3         | 0 | 1 | -0.170926  | 7.44978   | 6.29666   | No change |
| NM_001081194 | Kcnh4         | 0 | 1 | 0.872847   | 0.221014  | 0.398417  | No change |
| NM_001081195 | Arid4a        | 0 | 1 | -0.02101   | 5.25711   | 4.93097   | No change |
| NM_001081198 | Tmem182       | 0 | 1 | 1.43578    | 0.0635884 | 0.262011  | No change |
| NM_001081200 | Crnn          | 0 | 1 | 0.113855   | 0         | 0         | No change |

|              |               |   |   |            |           |           |           |
|--------------|---------------|---|---|------------|-----------|-----------|-----------|
| NM_001081205 | Nipal1        | 0 | 1 | 0.765932   | 0.331477  | 0.546328  | No change |
| NM_001081208 | Hs3st5        | 0 | 1 | 0.113855   | 0.0713336 | 0.073481  | No change |
| NM_001081209 | Prdm14        | 0 | 1 | 0.113855   | 0.0268773 | 0.0276865 | No change |
| NM_001081210 | Mrpl44        | 0 | 1 | 0.291393   | 8.17326   | 9.52844   | No change |
| NM_001081211 | Ptafr         | 0 | 1 | 0.00693961 | 1.03391   | 0.98614   | No change |
| NM_001081214 | Pprc1         | 0 | 1 | -0.0745903 | 1.94034   | 1.75233   | No change |
| NM_001081215 | Ddx60         | 0 | 1 | -0.0428707 | 0.779667  | 0.719228  | No change |
| NM_001081221 | Ercc6         | 0 | 1 | 0.122692   | 5.37882   | 5.57484   | No change |
| NM_001081224 | Prr16         | 0 | 1 | -0.886145  | 0.0313368 | 0         | No change |
| NM_001081229 | Tsc22d2       | 0 | 1 | -0.041176  | 4.17574   | 3.86235   | No change |
| NM_001081234 | Pigg          | 0 | 1 | 0.207238   | 6.25083   | 6.87089   | No change |
| NM_001081236 | 2410131K14Rik | 0 | 1 | 0.30925    | 3.39329   | 4.00631   | No change |
| NM_001081239 | Lilra5        | 0 | 1 | -0.0976493 | 0.693955  | 0.612725  | No change |
| NM_001081244 | BY080835      | 0 | 1 | -0.400718  | 0.548763  | 0.376855  | No change |
| NM_001081247 | Polr3a        | 0 | 1 | 0.0484449  | 8.37863   | 8.24761   | No change |
| NM_001081248 | Gm13177       | 0 | 1 | 0.113855   | 0         | 0         | No change |
| NM_001081250 | Myh13         | 0 | 1 | 0.0632287  | 0.335465  | 0.333223  | No change |
| NM_001081259 | Mfsd7b        | 0 | 1 | 0.318786   | 3.22289   | 3.82932   | No change |
| NM_001081269 | Whsc111       | 0 | 1 | 0.0588341  | 5.42407   | 5.37801   | No change |
| NM_001081271 | Calhm1        | 0 | 1 | 0.113855   | 0         | 0         | No change |
| NM_001081272 | Ldlrad1       | 0 | 1 | 1.11385    | 0.0735934 | 0.227427  | No change |
| NM_001081273 | 1600015I10Rik | 0 | 1 | 0.113855   | 0.112227  | 0.115605  | No change |
| NM_001081277 | Ak5           | 0 | 1 | 0.113855   | 0.741175  | 0.763488  | No change |
| NM_001081280 | Nlrc3         | 0 | 1 | -0.127153  | 0.42704   | 0.369512  | No change |
| NM_001081281 | Trim55        | 0 | 1 | -1.20807   | 0.156     | 0.040174  | No change |
| NM_001081283 | Tmem28        | 0 | 1 | -0.886145  | 0.0492182 | 0         | No change |
| NM_001081285 | Mup6          | 0 | 1 | 0.397648   | 2.83934   | 3.58955   | No change |
| NM_001081289 | 9030418K01Rik | 0 | 1 | -0.741755  | 1.13897   | 0.634196  | No change |
| NM_001081293 | Rprd2         | 0 | 1 | -0.0631208 | 5.29795   | 4.82643   | No change |
| NM_001081301 | Olfr455       | 0 | 1 | 0.113855   | 0         | 0         | No change |
| NM_001081306 | Ptprz1        | 0 | 1 | 0.85082    | 0.0172764 | 0.0355929 | No change |
| NM_001081307 | Ppp1r12b      | 0 | 1 | 0.0640063  | 5.86514   | 5.83573   | No change |
| NM_001081308 | Taok3         | 0 | 1 | -0.215453  | 1.59439   | 1.30375   | No change |
| NM_001081325 | Sult2a6       | 0 | 1 | 1.11385    | 0         | 0.0740877 | No change |
| NM_001081328 | Chsy3         | 0 | 1 | 0.413415   | 0.215434  | 0.277399  | No change |
| NM_001081335 | Cul9          | 0 | 1 | -0.115627  | 4.23435   | 3.71903   | No change |
| NM_001081342 | Gpr133        | 0 | 1 | 0.0245875  | 0.661428  | 0.639625  | No change |
| NM_001081343 | 3110043O21Rik | 0 | 1 | -0.0707529 | 7.77998   | 7.04889   | No change |
| NM_001081346 | Rtkn2         | 0 | 1 | -0.301183  | 0.19497   | 0.146065  | No change |
| NM_001081349 | Slc43a1       | 0 | 1 | 0.376889   | 0.384286  | 0.48068   | No change |
| NM_001081354 | Mamid1        | 0 | 1 | 0.414514   | 1.68411   | 2.14174   | No change |
| NM_001081365 | 0610010O12Rik | 0 | 1 | 0.218306   | 34.2022   | 37.8863   | No change |
| NM_001081368 | Tbccd1        | 0 | 1 | -0.144297  | 9.10496   | 7.83802   | No change |
| NM_001081369 | Ccdc153       | 0 | 1 | -0.269474  | 1.86105   | 1.45433   | No change |
| NM_001081372 | Ces1b         | 0 | 1 | 0.569534   | 1.20588   | 1.71714   | No change |
| NM_001081375 | Cnfn          | 0 | 1 | -1.47111   | 0.262992  | 0         | No change |
| NM_001081377 | Pcdh9         | 0 | 1 | 0.395626   | 1.27402   | 1.59824   | No change |
| NM_001081381 | 2610002I17Rik | 0 | 1 | 0.361782   | 1.587     | 1.94782   | No change |
| NM_001081382 | Zfp777        | 0 | 1 | 0.272401   | 4.41321   | 5.07683   | No change |
| NM_001081386 | Cdh19         | 0 | 1 | 0.113855   | 0.114101  | 0.117536  | No change |
| NM_001081389 | Nlrp6         | 0 | 1 | 0.206964   | 0.255219  | 0.281681  | No change |
| NM_001081397 | Myo16         | 0 | 1 | 0.479139   | 0.642025  | 0.855197  | No change |
| NM_001081399 | Prss33        | 0 | 1 | 0.85082    | 0.554318  | 0.986282  | No change |
| NM_001081403 | Klhl14        | 0 | 1 | 0.0519271  | 2.04673   | 2.01901   | No change |
| NM_001081405 | Vmn2r28       | 0 | 1 | 0.113855   | 0         | 0         | No change |
| NM_001081408 | Agmat         | 0 | 1 | -2.20807   | 0.198555  | 0         | No change |
| NM_001081414 | Grm5          | 0 | 1 | -1.76061   | 0.0826921 | 0.0170363 | No change |
| NM_001081415 | Samd1         | 0 | 1 | 0.129974   | 2.96136   | 3.08517   | No change |
| NM_001081416 | Fndc1         | 0 | 1 | 0.573286   | 0.369566  | 0.528055  | No change |
| NM_001081417 | Chd7          | 0 | 1 | -0.152578  | 1.87462   | 1.60414   | No change |
| NM_001081418 | Gltscl1       | 0 | 1 | 0.0918285  | 0.845157  | 0.857206  | No change |
| NM_001081419 | Dip2a         | 0 | 1 | 0.0472793  | 5.58114   | 5.48937   | No change |
| NM_001081421 | Galnt11       | 0 | 1 | -0.85138   | 0.711152  | 0.36628   | No change |
| NM_001081422 | Bod11         | 0 | 1 | 0.0542731  | 16.1751   | 15.9876   | No change |
| NM_001081424 | Chrna10       | 0 | 1 | -2.6935    | 0.166398  | 0         | No change |
| NM_001081425 | Rbm24         | 0 | 1 | 0.315489   | 0.84306   | 1.00205   | No change |
| NM_001081426 | Dip2c         | 0 | 1 | 0.215625   | 2.60567   | 2.88094   | No change |
| NM_001081433 | Ankrd44       | 0 | 1 | -0.119885  | 2.6447    | 2.31508   | No change |
| NM_001081434 | Osbpl7        | 0 | 1 | -0.0720707 | 6.01311   | 5.44271   | No change |
| NM_001081441 | Wdr86         | 0 | 1 | -1.6935    | 0.234131  | 0.0401965 | No change |
| NM_001081448 | Vmn2r84       | 0 | 1 | -0.886145  | 0.0819917 | 0.0281533 | No change |
| NM_001081449 | Vmn2r54       | 0 | 1 | -1.47111   | 0.0575737 | 0         | No change |
| NM_001081452 | LOC100009614  | 0 | 1 | 0.113855   | 0         | 0         | No change |
| NM_001081453 | Nin           | 0 | 1 | 0.229332   | 1.80805   | 2.01831   | No change |
| NM_001081459 | Sh2b1         | 0 | 1 | -0.0663947 | 6.15303   | 5.59133   | No change |
| NM_001081477 | Brwd3         | 0 | 1 | -0.14126   | 3.53122   | 3.04615   | No change |

|              |               |   |   |            |           |           |           |
|--------------|---------------|---|---|------------|-----------|-----------|-----------|
| NM_001081490 | Fbxo9         | 0 | 1 | 0.219757   | 15.3695   | 17.0411   | No change |
| NM_001081493 | Cartpt        | 0 | 1 | -0.623111  | 0.333858  | 0.171954  | No change |
| NM_001081564 | Gm6592        | 0 | 1 | -1.30118   | 0.96223   | 0.283199  | No change |
| NM_001081565 | Ssxb8         | 0 | 1 | -0.471108  | 0.672712  | 0.415778  | No change |
| NM_001081633 | Dgcr14        | 0 | 1 | -0.282373  | 6.25703   | 4.89137   | No change |
| NM_001081644 | Gm428         | 0 | 1 | 0.113855   | 0         | 0         | No change |
| NM_001081651 | Rab42-ps      | 0 | 1 | 0.471407   | 5.97368   | 7.91166   | No change |
| NM_001081652 | Nacad         | 0 | 1 | 0.58334    | 0.356085  | 0.513526  | No change |
| NM_001081654 | Tex264        | 0 | 1 | 0.00582719 | 24.2707   | 23.194    | No change |
| NM_001081656 | Neurl1b       | 0 | 1 | 0.274319   | 0.371666  | 0.429261  | No change |
| NM_001081658 | Dytn          | 0 | 1 | -2.20807   | 0.114863  | 0         | No change |
| NM_001081663 | Btln7         | 0 | 1 | -0.886145  | 0.119337  | 0.0409766 | No change |
| NM_001081664 | 4833423E24Rik | 0 | 1 | 1.69882    | 0         | 0.0852118 | No change |
| NM_001081665 | Ccdc129       | 0 | 1 | 0.637417   | 0.318329  | 0.480938  | No change |
| NM_001081669 | Rhox2d        | 0 | 1 | -0.886145  | 0.0876641 | 0         | No change |
| NM_001081672 | Fam43b        | 0 | 1 | -0.886145  | 0.0294436 | 0         | No change |
| NM_001081684 | Zfp295        | 0 | 1 | 0.186718   | 5.26141   | 5.70119   | No change |
| NM_001081687 | Gm5150        | 0 | 1 | -1.88615   | 0.229002  | 0         | No change |
| NM_001081688 | Tmprss9       | 0 | 1 | -1.60235   | 0.443904  | 0.124709  | No change |
| NM_001081695 | Dnmt3l        | 0 | 1 | -1.65168   | 0.614373  | 0.158217  | No change |
| NM_001081746 | Gm7609        | 0 | 1 | 0.325359   | 0.778692  | 0.935823  | No change |
| NM_001081956 | Akap17b       | 0 | 1 | -0.106535  | 2.70707   | 2.39187   | No change |
| NM_001081957 | Gm11428       | 0 | 1 | 0.698817   | 2.82338   | 4.4391    | No change |
| NM_001081961 | 2300005B03Rik | 0 | 1 | 0.113855   | 0         | 0         | No change |
| NM_001081962 | Sap25         | 0 | 1 | 0.0192179  | 4.05724   | 3.90974   | No change |
| NM_001081970 | Apol8         | 0 | 1 | -0.886145  | 0.113753  | 0.0390593 | No change |
| NM_001081978 | Amelx         | 0 | 1 | 1.11385    | 0.257804  | 0.619651  | No change |
| NM_001081983 | Tmsb15b1      | 0 | 1 | -0.382103  | 17.3042   | 12.592    | No change |
| NM_001081984 | Popdc2        | 0 | 1 | 0.358967   | 0.822522  | 1.01022   | No change |
| NM_001082412 | Mcart6        | 0 | 1 | 0.461778   | 0.698895  | 0.922416  | No change |
| NM_001082531 | Pla2g2a       | 0 | 1 | 0.113855   | 0         | 0         | No change |
| NM_001082542 | Gm5416        | 0 | 1 | 0.113855   | 0         | 0         | No change |
| NM_001082543 | Stfa1         | 0 | 1 | 0.113855   | 0         | 0         | No change |
| NM_001082545 | Stfa2         | 0 | 1 | 0.113855   | 0         | 0         | No change |
| NM_001082546 | BC100530      | 0 | 1 | -2.20807   | 0.632135  | 0         | No change |
| NM_001082547 | Gm5483        | 0 | 1 | 0.113855   | 0         | 0         | No change |
| NM_001082552 | Trim21        | 0 | 1 | 0.376889   | 3.45117   | 4.27138   | No change |
| NM_001082573 | Crygc         | 0 | 1 | 0.113855   | 0         | 0         | No change |
| NM_001082960 | Ilgam         | 0 | 1 | 0.318213   | 0.669838  | 0.797337  | No change |
| NM_001082974 | Neurl2        | 0 | 1 | 0.48825    | 1.56749   | 2.1115    | No change |
| NM_001082975 | Sdr39u1       | 0 | 1 | 0.0434655  | 19.0278   | 18.6645   | No change |
| NM_001083125 | Lhx6          | 0 | 1 | 0.62405    | 0.660205  | 0.977615  | No change |
| NM_001083188 | Lig1          | 0 | 1 | -0.216791  | 1.80335   | 1.47252   | No change |
| NM_001083311 | Vmn1r223      | 0 | 1 | -1.88615   | 0.192522  | 0         | No change |
| NM_001083312 | Gbp7          | 0 | 1 | 0.161949   | 2.21647   | 2.36103   | No change |
| NM_001083315 | St7           | 0 | 1 | -0.360076  | 2.37663   | 1.75342   | No change |
| NM_001083318 | Etv3          | 0 | 1 | 0.232383   | 4.41935   | 4.9434    | No change |
| NM_001083319 | Ubp1          | 0 | 1 | 0.0385163  | 9.22726   | 9.02046   | No change |
| NM_001083322 | Klrk1         | 0 | 1 | -1.14918   | 0.242756  | 0.0909322 | No change |
| NM_001083328 | Gtpbp5        | 0 | 1 | 0.143602   | 4.24412   | 4.46393   | No change |
| NM_001083342 | Ptchd2        | 0 | 1 | 0.435783   | 0.0240625 | 0.0330491 | No change |
| NM_001083628 | Greb1l        | 0 | 1 | -0.0116761 | 0.984854  | 0.92925   | No change |
| NM_001083810 | Prr5l         | 0 | 1 | 0.34518    | 0.730024  | 0.885689  | No change |
| NM_001083880 | 1600012H06Rik | 0 | 1 | 0.093487   | 11.8845   | 12.0703   | No change |
| NM_001083887 | Pars2         | 0 | 1 | 0.309111   | 1.54118   | 1.82104   | No change |
| NM_001083895 | SrpX2         | 0 | 1 | -0.409707  | 0.533488  | 0.374692  | No change |
| NM_001083902 | Slc12a8       | 0 | 1 | -0.471108  | 0.319902  | 0.211842  | No change |
| NM_001083903 | Sbsn          | 0 | 1 | -0.0466099 | 1.71376   | 1.5692    | No change |
| NM_001083917 | Scn3b         | 0 | 1 | -0.430466  | 0.570841  | 0.397782  | No change |
| NM_001083921 | Rbck1         | 0 | 1 | 0.10995    | 10.7287   | 11.0217   | No change |
| NM_001083925 | Oas1b         | 0 | 1 | 0.772818   | 0.684009  | 1.13519   | No change |
| NM_001083935 | Pth1r         | 0 | 1 | 0.467492   | 0.533204  | 0.710802  | No change |
| NM_001083957 | Car1          | 0 | 1 | -0.886145  | 0.0588623 | 0         | No change |
| NM_001083958 | Zfp655        | 0 | 1 | 0.448839   | 3.43529   | 4.47422   | No change |
| NM_001083967 | Tcf4          | 0 | 1 | -0.0944294 | 4.13176   | 3.68262   | No change |
| NM_001085348 | Rhox2e        | 0 | 1 | -1.47111   | 0.178929  | 0         | No change |
| NM_001085356 | Rhox2f        | 0 | 1 | -0.886145  | 0.0894646 | 0         | No change |
| NM_001085370 | Speg          | 0 | 1 | -0.0194117 | 0.232662  | 0.217879  | No change |
| NM_001085378 | Myh7b         | 0 | 1 | 0.336247   | 0.32794   | 0.396056  | No change |
| NM_001085385 | 1600014C10Rik | 0 | 1 | 0.21007    | 3.61201   | 3.97883   | No change |
| NM_001085390 | Dusp5         | 0 | 1 | 0.138517   | 3.43939   | 3.60509   | No change |
| NM_001085409 | Steap3        | 0 | 1 | 0.235845   | 0.735252  | 0.826239  | No change |
| NM_001085412 | Gm13078       | 0 | 1 | 0.113855   | 0         | 0         | No change |
| NM_001085414 | Pramef6       | 0 | 1 | 0.113855   | 0         | 0         | No change |
| NM_001085415 | Zfp467        | 0 | 1 | 0.113855   | 0.59749   | 0.615477  | No change |
| NM_001085418 | Pramel5       | 0 | 1 | 0.113855   | 0         | 0         | No change |

|                |               |   |   |            |           |           |           |
|----------------|---------------|---|---|------------|-----------|-----------|-----------|
| NM_001085419   | Gm13102       | 0 | 1 | 0.698817   | 0.0289784 | 0.0597014 | No change |
| NM_001085477   | Olfir765      | 0 | 1 | 0.113855   | 0         | 0         | No change |
| NM_001085497   | Slc25a43      | 0 | 1 | -2.47111   | 0.31365   | 0         | No change |
| NM_001085498   | Chmp6         | 0 | 1 | 0.0229086  | 13.8404   | 13.3832   | No change |
| NM_001085500   | Cisd3         | 0 | 1 | 0.476425   | 7.79584   | 10.3526   | No change |
| NM_001085501   | Ppp1r3d       | 0 | 1 | 0.397648   | 0.469456  | 0.593495  | No change |
| NM_001085502   | Nt5c1a        | 0 | 1 | 0.113855   | 0         | 0         | No change |
| NM_001085503   | Aadacl3       | 0 | 1 | -2.88615   | 0.154726  | 0         | No change |
| NM_001085504   | Gm436         | 0 | 1 | 0.113855   | 0         | 0         | No change |
| NM_001085505   | Gm572         | 0 | 1 | 0.113855   | 0         | 0         | No change |
| NM_001085509   | Myom3         | 0 | 1 | -0.538222  | 0.12501   | 0.0772638 | No change |
| NM_001085510   | Gm4987        | 0 | 1 | 1.69882    | 0         | 0.283759  | No change |
| NM_001085512   | E030025P04Rik | 0 | 1 | 0.113855   | 0         | 0         | No change |
| NM_001085516   | Gm12794       | 0 | 1 | 0.113855   | 0         | 0         | No change |
| NM_001085517   | Gm5132        | 0 | 1 | -0.886145  | 0.161326  | 0         | No change |
| NM_001085518   | Gm14085       | 0 | 1 | -0.886145  | 0.0931724 | 0.0383909 | No change |
| NM_001085520   | Gm12789       | 0 | 1 | 0.113855   | 0         | 0         | No change |
| NM_001085521   | Tmem90b       | 0 | 1 | 0.599282   | 0.135655  | 0.209609  | No change |
| NM_001085526   | Krtap1-3      | 0 | 1 | -0.886145  | 0.0794674 | 0         | No change |
| NM_001085527   | Krtap9-5      | 0 | 1 | -0.886145  | 0.0647102 | 0         | No change |
| NM_001085528   | Gm13271       | 0 | 1 | 0.336247   | 0.634726  | 0.784601  | No change |
| NM_001085529   | Slc2a7        | 0 | 1 | 0.113855   | 0         | 0         | No change |
| NM_001085533   | Gm13275       | 0 | 1 | 0.910321   | 0.806217  | 1.47642   | No change |
| NM_001085534   | Gm5938        | 0 | 1 | 0.113855   | 0         | 0         | No change |
| NM_001085536   | Gm13178       | 0 | 1 | 0.113855   | 0         | 0         | No change |
| NM_001085538   | Gm11757       | 0 | 1 | -0.886145  | 0.0526382 | 0         | No change |
| NM_001085539   | Gm13101       | 0 | 1 | 0.113855   | 0         | 0         | No change |
| NM_001085540   | Pramef17      | 0 | 1 | 0.113855   | 0         | 0         | No change |
| NM_001085541   | Gm13128       | 0 | 1 | 0.113855   | 0         | 0         | No change |
| NM_001085542   | Gm13124       | 0 | 1 | -0.886145  | 0.0570786 | 0         | No change |
| NM_001085544   | Gm14744       | 0 | 1 | 0.85082    | 0.435581  | 0.807648  | No change |
| NM_001085547   | Krtap4-8      | 0 | 1 | 0.113855   | 0         | 0         | No change |
| NM_001085548   | Krtap4-9      | 0 | 1 | 0.113855   | 0         | 0         | No change |
| NM_001085549   | Gm12824       | 0 | 1 | -1.37157   | 0.284375  | 0.0976453 | No change |
| NM_001093749   | Mpzl3         | 0 | 1 | -0.264657  | 2.06192   | 1.61423   | No change |
| NM_001093752   | Srsf11        | 0 | 1 | -0.0590789 | 36.5628   | 33.4063   | No change |
| NM_001093764   | Myadm         | 0 | 1 | 0.220244   | 4.5225    | 5.01701   | No change |
| NM_001097621   | Kif26a        | 0 | 1 | -0.278463  | 0.201483  | 0.155661  | No change |
| NM_001097623   | Trefl1        | 0 | 1 | 0.113855   | 0.460019  | 0.473868  | No change |
| NM_001097978   | Gm11758       | 0 | 1 | -0.886145  | 0.0744583 | 0         | No change |
| NM_001098203   | Hic1          | 0 | 1 | 0.735343   | 0.53792   | 0.864417  | No change |
| NM_001098226   | Tead3         | 0 | 1 | 0.41425    | 3.04373   | 3.86792   | No change |
| NM_001098233   | Purg          | 0 | 1 | -0.104785  | 2.44333   | 2.15732   | No change |
| NM_001098404   | Nr1i2         | 0 | 1 | -0.208073  | 0.115962  | 0.0895894 | No change |
| NM_001098669   | Klrc2         | 0 | 1 | -0.886145  | 0.0985756 | 0         | No change |
| NM_001098723   | Yy2           | 0 | 1 | -0.0204463 | 2.16347   | 2.02828   | No change |
| NM_001098799   | Tox2          | 0 | 1 | -1.20807   | 0.166431  | 0.0428603 | No change |
| NM_001098810   | Pthr2         | 0 | 1 | 0.17881    | 7.17776   | 7.73547   | No change |
| NM_001098841_2 | Gm13278       | 0 | 1 | 0.863877   | 1.00106   | 1.76777   | No change |
| NM_001099288   | Arhgap44      | 0 | 1 | -0.0550221 | 2.96308   | 2.71313   | No change |
| NM_001099296   | Grrp1         | 0 | 1 | 0.113855   | 0.511612  | 0.527014  | No change |
| NM_001099297   | Duox1         | 0 | 1 | 0.336247   | 0.06616   | 0.081782  | No change |
| NM_001099299   | Ajap1         | 0 | 1 | 1.20132    | 0.159064  | 0.374521  | No change |
| NM_001099301   | Lcn14         | 0 | 1 | 1.11385    | 0.285627  | 0.686526  | No change |
| NM_001099303   | Fam159a       | 0 | 1 | -0.471108  | 0.235052  | 0.121064  | No change |
| NM_001099309   | Gm12887       | 0 | 1 | 0.113855   | 0         | 0         | No change |
| NM_001099311   | Gm11596       | 0 | 1 | 0.113855   | 0         | 0         | No change |
| NM_001099312   | Gm11569       | 0 | 1 | 0.113855   | 0         | 0         | No change |
| NM_001099313   | Gm11554       | 0 | 1 | 0.113855   | 0         | 0         | No change |
| NM_001099314   | Msmg          | 0 | 1 | -0.220564  | 10.7869   | 8.7927    | No change |
| NM_001099316   | Rhox2b        | 0 | 1 | -0.886145  | 0.0915807 | 0         | No change |
| NM_001099318   | Rhox2c        | 0 | 1 | -0.886145  | 0.0894646 | 0         | No change |
| NM_001099324   | Gm15217       | 0 | 1 | 2.43578    | 0         | 0.392837  | No change |
| NM_001099328   | Zfp831        | 0 | 1 | -1.47111   | 0.0995106 | 0.0292875 | No change |
| NM_001099329   | Gm12769       | 0 | 1 | 0.113855   | 0         | 0         | No change |
| NM_001099330   | Gm12776       | 0 | 1 | 0.113855   | 0         | 0         | No change |
| NM_001099331   | R3hdml        | 0 | 1 | 0.113855   | 0         | 0         | No change |
| NM_001099332   | Cd101         | 0 | 1 | -0.886145  | 0.108018  | 0.0445077 | No change |
| NM_001099346   | Gm11937       | 0 | 1 | 0.113855   | 0         | 0         | No change |
| NM_001099348   | Gm13305       | 0 | 1 | 0.189143   | 5.95941   | 6.46964   | No change |
| NM_001099631   | Sh2d5         | 0 | 1 | 0.226749   | 1.88659   | 2.10343   | No change |
| NM_001099632   | Rnf39         | 0 | 1 | -0.108538  | 0.289182  | 0.24824   | No change |
| NM_001099635   | Myh3          | 0 | 1 | 0.113855   | 0.023262  | 0.0239623 | No change |
| NM_001099641   | Gabra6        | 0 | 1 | 0.113855   | 0         | 0         | No change |
| NM_001099644   | Htr3a         | 0 | 1 | -2.47111   | 0.168748  | 0         | No change |
| NM_001099664   | Npw           | 0 | 1 | -1.47111   | 0.23001   | 0         | No change |

|              |               |   |   |            |           |           |           |
|--------------|---------------|---|---|------------|-----------|-----------|-----------|
| NM_001099742 | Scgb1c1       | 0 | 1 | -1.20807   | 0.637922  | 0.164281  | No change |
| NM_001099774 | Krtap17-1     | 0 | 1 | -2.6935    | 0.549484  | 0         | No change |
| NM_001099779 | Pklr          | 0 | 1 | -0.301183  | 0.49762   | 0.377705  | No change |
| NM_001099918 | 4930431A04Rik | 0 | 1 | -1.88615   | 0.324153  | 0         | No change |
| NM_001100109 | Srp54b        | 0 | 1 | 0.024266   | 48.5899   | 47.0377   | No change |
| NM_001100110 | Srp54c        | 0 | 1 | -0.0282184 | 50.7739   | 47.3946   | No change |
| NM_001100177 | Calcoco2      | 0 | 1 | -1.30118   | 0.346239  | 0.101903  | No change |
| NM_001100180 | Cyp3a57       | 0 | 1 | 0.113855   | 0.0438596 | 0.04518   | No change |
| NM_001100181 | Cyp4a32       | 0 | 1 | -1.47111   | 0.0728244 | 0         | No change |
| NM_001100182 | Cyp2j12       | 0 | 1 | -0.886145  | 0.0358503 | 0         | No change |
| NM_001100183 | Cyp4a29-ps    | 0 | 1 | -0.886145  | 0.0455509 | 0         | No change |
| NM_001100184 | Cyp2t4        | 0 | 1 | -0.734142  | 0.368746  | 0.189923  | No change |
| NM_001100185 | Cyp4a30b-ps   | 0 | 1 | 0.92121    | 0.136921  | 0.282086  | No change |
| NM_001100186 | Zscan4d       | 0 | 1 | -1.88615   | 0.104959  | 0         | No change |
| NM_001100451 | Msl2          | 0 | 1 | 0.151885   | 8.46565   | 8.95382   | No change |
| NM_001100452 | BC032203      | 0 | 1 | -0.14002   | 4.97882   | 4.29938   | No change |
| NM_001100454 | Wfikkn1       | 0 | 1 | -0.35563   | 0.96185   | 0.707719  | No change |
| NM_001100455 | Lcn11         | 0 | 1 | -0.886145  | 0.106891  | 0         | No change |
| NM_001100461 | Pnma5         | 0 | 1 | 0.236712   | 1.34083   | 1.50676   | No change |
| NM_001100464 | Abpb          | 0 | 1 | 0.113855   | 0         | 0         | No change |
| NM_001100465 | Rhox2h        | 0 | 1 | -1.47111   | 0.178929  | 0         | No change |
| NM_001100466 | Skint8        | 0 | 1 | -2.20807   | 0.218131  | 0         | No change |
| NM_001100614 | Gm11564       | 0 | 1 | 0.113855   | 0         | 0         | No change |
| NM_001100616 | Vmn2r121      | 0 | 1 | -0.886145  | 0.0227606 | 0         | No change |
| NM_001101038 | Siglec15      | 0 | 1 | -0.345577  | 0.677288  | 0.488374  | No change |
| NM_001101430 | Psmg4         | 0 | 1 | 0.363214   | 6.69877   | 8.22743   | No change |
| NM_001101431 | 2510049J12Rik | 0 | 1 | 0.998378   | 0.329388  | 0.650332  | No change |
| NM_001101433 | Zcchc24       | 0 | 1 | -0.12061   | 3.17003   | 2.77318   | No change |
| NM_001101443 | Prrt4         | 0 | 1 | -0.14918   | 0.102099  | 0.0841383 | No change |
| NM_001101450 | Gm44          | 0 | 1 | 0.113855   | 0         | 0         | No change |
| NM_001101452 | Gm4794        | 0 | 1 | -0.886145  | 0.0790169 | 0         | No change |
| NM_001101461 | 9130204L05Rik | 0 | 1 | -2.6935    | 0.851645  | 0         | No change |
| NM_001101464 | Foxi3         | 0 | 1 | 0.113855   | 0         | 0         | No change |
| NM_001101467 | Cyp2a22       | 0 | 1 | 0.113855   | 0         | 0         | No change |
| NM_001101471 | Akap5         | 0 | 1 | 0.239386   | 0.333609  | 0.375869  | No change |
| NM_001101472 | Serpina3j     | 0 | 1 | -0.886145  | 0.0348639 | 0         | No change |
| NM_001101475 | F830016B08Rik | 0 | 1 | -0.530001  | 1.03578   | 0.675014  | No change |
| NM_001101482 | Mrap2         | 0 | 1 | 1.11385    | 0.21655   | 0.483316  | No change |
| NM_001101488 | Gsg1l         | 0 | 1 | -0.471108  | 0.0888034 | 0.0548861 | No change |
| NM_001101502 | Zfp703        | 0 | 1 | -0.0116761 | 0.505499  | 0.475437  | No change |
| NM_001101503 | A230065H16Rik | 0 | 1 | 0.113855   | 0.106078  | 0.109271  | No change |
| NM_001101506 | Gm5151        | 0 | 1 | -1.47111   | 0.252877  | 0.0520979 | No change |
| NM_001101516 | Gpr25         | 0 | 1 | -0.886145  | 0.0355576 | 0         | No change |
| NM_001101519 | 4932443I19Rik | 0 | 1 | -1.88615   | 0.624649  | 0.0919219 | No change |
| NM_001101533 | Vmn1r20       | 0 | 1 | 0.113855   | 0         | 0         | No change |
| NM_001101534 | Sult2a4       | 0 | 1 | 0.376889   | 0.289182  | 0.37236   | No change |
| NM_001101535 | Ccdc8         | 0 | 1 | -0.208073  | 0.982068  | 0.802329  | No change |
| NM_001101546 | Tmem233       | 0 | 1 | 0.113855   | 0         | 0         | No change |
| NM_001101560 | Cldn20        | 0 | 1 | -0.301183  | 1.58393   | 1.19652   | No change |
| NM_001101562 | Vmn1r167      | 0 | 1 | 0.113855   | 0         | 0         | No change |
| NM_001101572 | Vmn2r82       | 0 | 1 | 0.113855   | 0         | 0         | No change |
| NM_001101579 | Vmn1r12       | 0 | 1 | 0.113855   | 0         | 0         | No change |
| NM_001101585 | Gm6927        | 0 | 1 | -1.88615   | 0.327197  | 0         | No change |
| NM_001101586 | Sult2a3       | 0 | 1 | 0.113855   | 0         | 0         | No change |
| NM_001101588 | Cyp4f40       | 0 | 1 | 2.43578    | 0         | 0.18198   | No change |
| NM_001101597 | Gm7244        | 0 | 1 | 0.113855   | 0         | 0         | No change |
| NM_001101600 | Gm7616        | 0 | 1 | 0.113855   | 0         | 0         | No change |
| NM_001101605 | Gm14446       | 0 | 1 | 0.961852   | 0.283177  | 0.550992  | No change |
| NM_001101606 | Gm8817        | 0 | 1 | 1.11385    | 0         | 0.125949  | No change |
| NM_001101609 | Gm9376        | 0 | 1 | 0.113855   | 0         | 0         | No change |
| NM_001101613 | Gm11567       | 0 | 1 | 0.113855   | 0         | 0         | No change |
| NM_001101620 | Klra8         | 0 | 1 | -1.10854   | 0.354973  | 0.121886  | No change |
| NM_001101630 | Gm3238        | 0 | 1 | 1.11385    | 0         | 0.103594  | No change |
| NM_001101631 | Gm3285        | 0 | 1 | 0.113855   | 0.104959  | 0.108119  | No change |
| NM_001101640 | Tmem207       | 0 | 1 | -1.47111   | 0.090628  | 0         | No change |
| NM_001101647 | Prlh          | 0 | 1 | 0.113855   | 0         | 0         | No change |
| NM_001101656 | Gm11710       | 0 | 1 | -0.433633  | 3.02657   | 2.10654   | No change |
| NM_001101657 | Gm11711       | 0 | 1 | -0.433633  | 3.02657   | 2.10654   | No change |
| NM_001102409 | Kng2          | 0 | 1 | 1.11385    | 0.475572  | 1.02431   | No change |
| NM_001102411 | Kng1          | 0 | 1 | 0.528892   | 0.0606289 | 0.0936811 | No change |
| NM_001102446 | Alas2         | 0 | 1 | -0.192476  | 4.10806   | 3.41508   | No change |
| NM_001102455 | Aplp2         | 0 | 1 | 0.0224875  | 59.9001   | 57.9156   | No change |
| NM_001102457 | Rhox3c        | 0 | 1 | -2.47111   | 0.537754  | 0         | No change |
| NM_001102468 | Calml4        | 0 | 1 | 0.277354   | 4.74959   | 5.49166   | No change |
| NM_001102474 | Skint3        | 0 | 1 | 0.113855   | 0.0482638 | 0.0497167 | No change |
| NM_001102563 | Prrt2         | 0 | 1 | 0.654423   | 0.587772  | 0.893783  | No change |

|              |          |   |   |            |           |           |           |
|--------------|----------|---|---|------------|-----------|-----------|-----------|
| NM_001102565 | Alkbh1   | 0 | 1 | 0.161949   | 8.40752   | 8.95544   | No change |
| NM_001102578 | Vmn2r75  | 0 | 1 | 0.113855   | 0         | 0         | No change |
| NM_001102579 | Vmn2r67  | 0 | 1 | -2.20807   | 0.109066  | 0         | No change |
| NM_001102580 | Vmn2r76  | 0 | 1 | -0.886145  | 0.0272026 | 0         | No change |
| NM_001102581 | Vmn2r95  | 0 | 1 | 0.113855   | 0         | 0         | No change |
| NM_001102582 | Vmn2r18  | 0 | 1 | -0.471108  | 0.146107  | 0.0903031 | No change |
| NM_001102584 | Vmn2r114 | 0 | 1 | -0.886145  | 0.0271073 | 0         | No change |
| NM_001102602 | Vmn2r85  | 0 | 1 | -2.20807   | 0.109194  | 0         | No change |
| NM_001102607 | Col6a6   | 0 | 1 | 0.0434655  | 0.196373  | 0.192171  | No change |
| NM_001102611 | Smyd4    | 0 | 1 | 0.0440334  | 2.49682   | 2.44951   | No change |
| NM_001102613 | Phldb3   | 0 | 1 | -0.0236487 | 0.977289  | 0.91233   | No change |
| NM_001102660 | Gm2663   | 0 | 1 | 0.113855   | 0         | 0         | No change |
| NM_001102662 | Skint1   | 0 | 1 | 0.113855   | 0         | 0         | No change |
| NM_001102665 | Gm14920  | 0 | 1 | -3.20807   | 1.8024    | 0         | No change |
| NM_001103153 | Gm10334  | 0 | 1 | 0.113855   | 0         | 0         | No change |
| NM_001103156 | Steap2   | 0 | 1 | -0.220263  | 1.39696   | 1.14009   | No change |
| NM_001103168 | Zglp1    | 0 | 1 | -1.62311   | 0.621026  | 0.14216   | No change |
| NM_001103199 | Skint6   | 0 | 1 | 0.113855   | 0         | 0         | No change |
| NM_001103365 | Vmn2r86  | 0 | 1 | -2.20807   | 0.246265  | 0.0281865 | No change |
| NM_001103366 | Vmn2r87  | 0 | 1 | -0.886145  | 0.0273628 | 0         | No change |
| NM_001103367 | Rai2     | 0 | 1 | 0.347054   | 1.77562   | 2.15569   | No change |
| NM_001103368 | Vmn2r80  | 0 | 1 | 0.113855   | 0         | 0         | No change |
| NM_001104525 | Cyp2c69  | 0 | 1 | -0.886145  | 0.0393745 | 0         | No change |
| NM_001104529 | Gpr35    | 0 | 1 | -0.117471  | 0.453344  | 0.395147  | No change |
| NM_001104531 | Cyp2d11  | 0 | 1 | 0.113855   | 0.043832  | 0.0451516 | No change |
| NM_001104537 | Vmn2r83  | 0 | 1 | 0.113855   | 0         | 0         | No change |
| NM_001104539 | Vmn2r90  | 0 | 1 | -0.886145  | 0.0268877 | 0         | No change |
| NM_001104540 | Vmn2r91  | 0 | 1 | 0.113855   | 0         | 0         | No change |
| NM_001104541 | Vmn2r92  | 0 | 1 | 0.113855   | 0         | 0         | No change |
| NM_001104542 | Vmn2r93  | 0 | 1 | 0.113855   | 0         | 0         | No change |
| NM_001104543 | Vmn2r94  | 0 | 1 | 0.113855   | 0         | 0         | No change |
| NM_001104547 | Vmn2r96  | 0 | 1 | 0.113855   | 0         | 0         | No change |
| NM_001104549 | Vmn2r97  | 0 | 1 | -0.886145  | 0.0269501 | 0         | No change |
| NM_001104550 | Vmn2r98  | 0 | 1 | 0.113855   | 0         | 0         | No change |
| NM_001104551 | Vmn2r99  | 0 | 1 | -0.886145  | 0.0271073 | 0         | No change |
| NM_001104562 | Vmn2r100 | 0 | 1 | 0.113855   | 0         | 0         | No change |
| NM_001104563 | Vmn2r101 | 0 | 1 | -1.47111   | 0.0541515 | 0         | No change |
| NM_001104564 | Vmn2r102 | 0 | 1 | -0.886145  | 0.0270757 | 0         | No change |
| NM_001104565 | Vmn2r103 | 0 | 1 | 0.113855   | 0         | 0         | No change |
| NM_001104566 | Vmn2r104 | 0 | 1 | 0.113855   | 0         | 0         | No change |
| NM_001104567 | Vmn2r105 | 0 | 1 | 0.113855   | 0         | 0         | No change |
| NM_001104568 | Vmn2r106 | 0 | 1 | 0.113855   | 0         | 0         | No change |
| NM_001104570 | Vmn2r108 | 0 | 1 | 0.113855   | 0         | 0         | No change |
| NM_001104571 | Vmn2r109 | 0 | 1 | -1.88615   | 0.0811326 | 0         | No change |
| NM_001104572 | Vmn2r110 | 0 | 1 | -1.47111   | 0.0540884 | 0         | No change |
| NM_001104575 | Vmn2r112 | 0 | 1 | -2.6935    | 0.162454  | 0         | No change |
| NM_001104578 | Vmn2r113 | 0 | 1 | 0.113855   | 0         | 0         | No change |
| NM_001104579 | Vmn2r115 | 0 | 1 | -2.20807   | 0.108303  | 0         | No change |
| NM_001104580 | Vmn2r116 | 0 | 1 | 0.113855   | 0         | 0         | No change |
| NM_001104581 | Vmn2r117 | 0 | 1 | -0.886145  | 0.0812272 | 0.0278908 | No change |
| NM_001104582 | Vmn2r118 | 0 | 1 | -3.05607   | 0.21762   | 0         | No change |
| NM_001104591 | Vmn2r120 | 0 | 1 | 0.113855   | 0         | 0         | No change |
| NM_001104592 | Vmn2r2   | 0 | 1 | -1.6935    | 0.364738  | 0.0867041 | No change |
| NM_001104620 | Vmn2r8   | 0 | 1 | -1.88615   | 0.0820883 | 0         | No change |
| NM_001104621 | Vmn2r9   | 0 | 1 | -1.47111   | 0.0547255 | 0         | No change |
| NM_001104622 | Vmn2r11  | 0 | 1 | -2.20807   | 0.1078    | 0         | No change |
| NM_001104624 | Vmn2r13  | 0 | 1 | -2.47111   | 0.139609  | 0         | No change |
| NM_001104625 | Vmn2r14  | 0 | 1 | -1.47111   | 0.0547255 | 0         | No change |
| NM_001104626 | Vmn2r15  | 0 | 1 | -1.88615   | 0.081417  | 0         | No change |
| NM_001104627 | Vmn2r16  | 0 | 1 | -0.886145  | 0.0272984 | 0         | No change |
| NM_001104628 | Vmn2r17  | 0 | 1 | -0.886145  | 0.0273306 | 0         | No change |
| NM_001104632 | Vmn2r19  | 0 | 1 | -2.20807   | 0.108683  | 0         | No change |
| NM_001104634 | Vmn2r20  | 0 | 1 | 0.113855   | 0         | 0         | No change |
| NM_001104635 | Vmn2r21  | 0 | 1 | 0.113855   | 0         | 0         | No change |
| NM_001104637 | Vmn2r22  | 0 | 1 | 0.113855   | 0         | 0         | No change |
| NM_001104638 | Vmn2r23  | 0 | 1 | 0.113855   | 0         | 0         | No change |
| NM_001104639 | Vmn2r24  | 0 | 1 | -0.886145  | 0.0271707 | 0         | No change |
| NM_001104641 | Vmn2r25  | 0 | 1 | -0.886145  | 0.027139  | 0         | No change |
| NM_001104642 | Vmn2r27  | 0 | 1 | -2.20807   | 0.108303  | 0         | No change |
| NM_001104644 | Vmn2r53  | 0 | 1 | -2.88615   | 0.201508  | 0         | No change |
| NM_001104645 | Vmn2r55  | 0 | 1 | -0.886145  | 0.0297071 | 0         | No change |
| NM_001104648 | Vmn2r56  | 0 | 1 | -1.47111   | 0.0595666 | 0         | No change |
| NM_001104926 | Cyp2j7   | 0 | 1 | 1.11385    | 0         | 0.0473868 | No change |
| NM_001104927 | Cyp2j8   | 0 | 1 | 1.11385    | 0.0458506 | 0.141693  | No change |
| NM_001105055 | Vmn2r58  | 0 | 1 | -2.20807   | 0.107675  | 0         | No change |
| NM_001105056 | Vmn2r59  | 0 | 1 | 0.113855   | 0         | 0         | No change |



|              |               |   |   |            |           |           |           |
|--------------|---------------|---|---|------------|-----------|-----------|-----------|
| NM_001105057 | Vmn2r60       | 0 | 1 | 0.113855   | 0         | 0         | No change |
| NM_001105058 | Vmn2r61       | 0 | 1 | 0.113855   | 0         | 0         | No change |
| NM_001105059 | Vmn2r62       | 0 | 1 | -1.20807   | 0.108051  | 0.027826  | No change |
| NM_001105060 | Vmn2r63       | 0 | 1 | 0.113855   | 0.108051  | 0.111304  | No change |
| NM_001105061 | Gm9268        | 0 | 1 | -0.886145  | 0.0271707 | 0         | No change |
| NM_001105062 | Vmn2r31       | 0 | 1 | 0.791927   | 0.1078    | 0.19433   | No change |
| NM_001105063 | Vmn2r32       | 0 | 1 | -0.886145  | 0.0272344 | 0         | No change |
| NM_001105065 | Vmn2r33       | 0 | 1 | 0.113855   | 0.188651  | 0.19433   | No change |
| NM_001105066 | Vmn2r34       | 0 | 1 | 2.11385    | 0         | 0.0841629 | No change |
| NM_001105067 | Vmn2r35       | 0 | 1 | 0.528892   | 0.0539002 | 0.0832842 | No change |
| NM_001105068 | Vmn2r36       | 0 | 1 | 1.33625    | 0.0544689 | 0.168326  | No change |
| NM_001105070 | Vmn2r38       | 0 | 1 | 0.336247   | 0.13475   | 0.166568  | No change |
| NM_001105071 | Vmn2r39       | 0 | 1 | 1.11385    | 0         | 0.0277614 | No change |
| NM_001105072 | Vmn2r40       | 0 | 1 | 0.85082    | 0.0544689 | 0.112217  | No change |
| NM_001105073 | Vmn2r41       | 0 | 1 | 0.85082    | 0.0544689 | 0.112217  | No change |
| NM_001105074 | Vmn2r44       | 0 | 1 | 1.11385    | 0.0539002 | 0.138807  | No change |
| NM_001105075 | Vmn2r45       | 0 | 1 | 2.69882    | 0         | 0.140272  | No change |
| NM_001105076 | Vmn2r46       | 0 | 1 | 0.409311   | 1.23325   | 1.56581   | No change |
| NM_001105151 | Vmn2r47       | 0 | 1 | 0.85082    | 0.0544689 | 0.112217  | No change |
| NM_001105152 | Vmn2r48       | 0 | 1 | 1.11385    | 0.054278  | 0.13978   | No change |
| NM_001105156 | Vmn2r49       | 0 | 1 | 0.113855   | 0         | 0         | No change |
| NM_001105159 | Cyp3a41b      | 0 | 1 | 0.113855   | 0         | 0         | No change |
| NM_001105160 | Cyp3a59       | 0 | 1 | 0.113855   | 0         | 0         | No change |
| NM_001105178 | Vmn2r50       | 0 | 1 | 0.113855   | 0         | 0         | No change |
| NM_001105179 | Vmn2r51       | 0 | 1 | 0.113855   | 0.0272344 | 0.0280543 | No change |
| NM_001105180 | Vmn2r65       | 0 | 1 | -0.886145  | 0.0274598 | 0         | No change |
| NM_001105182 | Vmn2r69       | 0 | 1 | -2.47111   | 0.136492  | 0         | No change |
| NM_001105183 | Vmn2r70       | 0 | 1 | 0.113855   | 0         | 0         | No change |
| NM_001105184 | Vmn2r71       | 0 | 1 | -3.05607   | 0.217112  | 0         | No change |
| NM_001105185 | Vmn2r72-ps    | 0 | 1 | -0.886145  | 0.0271073 | 0         | No change |
| NM_001105186 | Vmn2r73       | 0 | 1 | 0.113855   | 0         | 0         | No change |
| NM_001105187 | Vmn2r74       | 0 | 1 | -0.886145  | 0.0272026 | 0         | No change |
| NM_001105188 | Vmn2r77       | 0 | 1 | 1.11385    | 0         | 0.0279887 | No change |
| NM_001105189 | Vmn2r78       | 0 | 1 | 0.113855   | 0.190418  | 0.19615   | No change |
| NM_001105190 | Vmn2r79       | 0 | 1 | 0.113855   | 0         | 0         | No change |
| NM_001105191 | Vmn2r52       | 0 | 1 | -1.88615   | 0.0817033 | 0         | No change |
| NM_001105201 | Cyp26c1       | 0 | 1 | 0.528892   | 0.0895221 | 0.138326  | No change |
| NM_001105254 | Gm10436       | 0 | 1 | 0.113855   | 0         | 0         | No change |
| NM_001109626 | Cdk12         | 0 | 1 | -0.0784428 | 10.7688   | 9.70755   | No change |
| NM_001109661 | Bach2         | 0 | 1 | 0.202391   | 0.640062  | 0.701596  | No change |
| NM_001109743 | Skor2         | 0 | 1 | 0.113855   | 0         | 0         | No change |
| NM_001109748 | Tomm40        | 0 | 1 | 0.22077    | 12.4661   | 13.8325   | No change |
| NM_001109749 | Cntn4         | 0 | 1 | -2.20807   | 0.0529783 | 0         | No change |
| NM_001109752 | Dlg4          | 0 | 1 | -0.0787903 | 0.483249  | 0.432867  | No change |
| NM_001109753 | Sv2b          | 0 | 1 | -0.546659  | 0.629282  | 0.405141  | No change |
| NM_001109758 | Bcan          | 0 | 1 | 0.113855   | 0         | 0         | No change |
| NM_001109873 | Cbfa2t3       | 0 | 1 | -0.169938  | 0.245366  | 0.205946  | No change |
| NM_001109914 | Apold1        | 0 | 1 | 0.634687   | 0.466883  | 0.699547  | No change |
| NM_001109973 | Mdfi          | 0 | 1 | 0.791927   | 0.163311  | 0.294398  | No change |
| NM_001109975 | Synpo         | 0 | 1 | 0.0871375  | 1.68047   | 1.699     | No change |
| NM_001109985 | Nos1ap        | 0 | 1 | -0.0116761 | 0.539165  | 0.507101  | No change |
| NM_001110015 | Wdr36         | 0 | 1 | -0.0482507 | 4.37572   | 4.02607   | No change |
| NM_001110131 | Cic           | 0 | 1 | 0.181283   | 4.76738   | 5.14643   | No change |
| NM_001110146 | Prg4          | 0 | 1 | 0.288942   | 1.10976   | 1.29559   | No change |
| NM_001110160 | Lrrc61        | 0 | 1 | -0.191199  | 11.0219   | 9.18475   | No change |
| NM_001110203 | Trim9         | 0 | 1 | 0.497183   | 0.64757   | 0.874596  | No change |
| NM_001110209 | Lnp           | 0 | 1 | 0.0821191  | 9.483     | 9.55577   | No change |
| NM_001110222 | Dcx           | 0 | 1 | 0.113855   | 0         | 0         | No change |
| NM_001110227 | Kcnj13        | 0 | 1 | -0.435484  | 3.0481    | 2.12872   | No change |
| NM_001110242 | 1810043H04Rik | 0 | 1 | -0.137684  | 13.9668   | 12.062    | No change |
| NM_001110252 | Hpn           | 0 | 1 | 0.517752   | 2.43735   | 3.33455   | No change |
| NM_001110253 | Fyco1         | 0 | 1 | -0.0642059 | 21.1298   | 19.2376   | No change |
| NM_001110273 | Slc14a2       | 0 | 1 | 0.620815   | 0.431832  | 0.642535  | No change |
| NM_001110305 | Keap1         | 0 | 1 | -0.130629  | 13.7803   | 11.9791   | No change |
| NM_001110309 | Zfp426        | 0 | 1 | 0.203056   | 8.9282    | 9.78491   | No change |
| NM_001110316 | Zscan4f       | 0 | 1 | -3.05607   | 0.304835  | 0         | No change |
| NM_001110323 | Klra7         | 0 | 1 | 1.11385    | 0         | 0.0688973 | No change |
| NM_001110327 | Dmtf1         | 0 | 1 | -0.087476  | 14.0808   | 12.6128   | No change |
| NM_001110350 | Sin3a         | 0 | 1 | -0.0969924 | 11.0178   | 9.80436   | No change |
| NM_001110513 | Ebf4          | 0 | 1 | 0.113855   | 0.313227  | 0.322656  | No change |
| NM_001110779 | Gm7714        | 0 | 1 | 2.11385    | 0         | 0.314413  | No change |
| NM_001110783 | Ank1          | 0 | 1 | -0.973608  | 0.135688  | 0.0611507 | No change |
| NM_001110791 | Sf1           | 0 | 1 | 0.0670826  | 11.5063   | 11.474    | No change |
| NM_001110807 | Capn12        | 0 | 1 | 0.308671   | 2.0208    | 2.38626   | No change |
| NM_001110809 | Gpatch4       | 0 | 1 | -0.0270077 | 1.79357   | 1.6716    | No change |
| NM_001110824 | Foxp4         | 0 | 1 | 0.113855   | 1.31594   | 1.35556   | No change |

|              |                |   |   |            |           |           |           |
|--------------|----------------|---|---|------------|-----------|-----------|-----------|
| NM_001110831 | Dnpep          | 0 | 1 | -0.10877   | 39.6165   | 34.968    | No change |
| NM_001110832 | Nfya           | 0 | 1 | -0.133238  | 6.06597   | 5.26196   | No change |
| NM_001111015 | Syn2           | 0 | 1 | 0.142424   | 1.02152   | 1.07375   | No change |
| NM_001111043 | Serpinh1       | 0 | 1 | 0.18275    | 11.2527   | 12.1599   | No change |
| NM_001111058 | Cd33           | 0 | 1 | 0.0119752  | 1.16562   | 1.11693   | No change |
| NM_001111073 | Fxyd5          | 0 | 1 | 0.317388   | 3.95983   | 4.70658   | No change |
| NM_001111075 | Cdc25b         | 0 | 1 | 0.0524543  | 0.529372  | 0.521599  | No change |
| NM_001111094 | Btnl3          | 0 | 1 | 1.11385    | 0.0329829 | 0.101928  | No change |
| NM_001111099 | Cdkn1a         | 0 | 1 | 0.316672   | 3.77983   | 4.48694   | No change |
| NM_001111100 | Lipa           | 0 | 1 | 0.320817   | 4.39251   | 5.22644   | No change |
| NM_001111107 | Zfp322a        | 0 | 1 | 0.0497245  | 7.16509   | 7.05925   | No change |
| NM_001111110 | Cmah           | 0 | 1 | -0.114414  | 0.286596  | 0.25094   | No change |
| NM_001111111 | Atg16l2        | 0 | 1 | 0.322441   | 1.41705   | 1.69193   | No change |
| NM_001111140 | Lrrc10b        | 0 | 1 | 0.144882   | 3.05347   | 3.21452   | No change |
| NM_001111143 | Cym            | 0 | 1 | 0.113855   | 0         | 0         | No change |
| NM_001111145 | Gm514          | 0 | 1 | -0.14918   | 0.252328  | 0.207939  | No change |
| NM_001111277 | Eif2b3         | 0 | 1 | 0.367611   | 3.4644    | 4.26389   | No change |
| NM_001111286 | Omt2a          | 0 | 1 | 0.113855   | 0         | 0         | No change |
| NM_001111288 | Sco2           | 0 | 1 | -0.0466099 | 10.3474   | 9.53033   | No change |
| NM_001111296 | Sult2a1        | 0 | 1 | 1.11385    | 0         | 0.0703144 | No change |
| NM_001111316 | Ptprc          | 0 | 1 | -0.0489403 | 4.02359   | 3.70109   | No change |
| NM_001111318 | Cldn24         | 0 | 1 | -1.62311   | 0.946058  | 0.216564  | No change |
| NM_001111320 | ldh1           | 0 | 1 | -0.159878  | 23.0886   | 19.6679   | No change |
| NM_001111330 | Gm16379        | 0 | 1 | 0.189406   | 12.1435   | 13.1889   | No change |
| NM_001111336 | Hsd3b4         | 0 | 1 | -1.15916   | 1.15468   | 0.467279  | No change |
| NM_001112668 | Gm9790         | 0 | 1 | -0.173026  | 49.9685   | 42.1603   | No change |
| NM_001112697 | Chrm1          | 0 | 1 | 0.113855   | 0.155218  | 0.159891  | No change |
| NM_001112698 | Ngf            | 0 | 1 | 0.354863   | 0.657481  | 0.812728  | No change |
| NM_001112702 | Tnni1          | 0 | 1 | -1.88615   | 0.201425  | 0         | No change |
| NM_001112725 | Aldh3a1        | 0 | 1 | -0.157447  | 1.48562   | 1.26028   | No change |
| NM_001112729 | BC019943       | 0 | 1 | -0.102279  | 4.75682   | 4.2163    | No change |
| NM_001112813 | Cacna1g        | 0 | 1 | -0.812145  | 0.316242  | 0.167283  | No change |
| NM_001113187 | Khdc1b         | 0 | 1 | 0.698817   | 0.15508   | 0.255598  | No change |
| NM_001113198 | Mitf           | 0 | 1 | 0.561314   | 0.769615  | 1.08641   | No change |
| NM_001113208 | Ncam2          | 0 | 1 | -0.886145  | 0.0195492 | 0         | No change |
| NM_001113238 | Fcrl5          | 0 | 1 | -0.886145  | 0.0262299 | 0         | No change |
| NM_001113283 | BC031353       | 0 | 1 | -0.142862  | 10.1939   | 8.78636   | No change |
| NM_001113325 | Gria1          | 0 | 1 | -0.0496439 | 0.332164  | 0.304145  | No change |
| NM_001113330 | Crx            | 0 | 1 | 0.113855   | 0         | 0         | No change |
| NM_001113333 | Cry2           | 0 | 1 | 0.144661   | 4.3856    | 4.61584   | No change |
| NM_001113345 | Gatad2a        | 0 | 1 | -0.090753  | 18.5178   | 16.5512   | No change |
| NM_001113356 | C1rb           | 0 | 1 | 0.0737774  | 2.31666   | 2.32011   | No change |
| NM_001113360 | Plch2          | 0 | 1 | 0.113855   | 0.689619  | 0.71038   | No change |
| NM_001113379 | Lrrc32         | 0 | 1 | 0.435783   | 0.420057  | 0.545581  | No change |
| NM_001113386 | Lifr           | 0 | 1 | 0.100115   | 5.1461    | 5.25054   | No change |
| NM_001113387 | Myl1           | 0 | 1 | -1.88615   | 0.25591   | 0         | No change |
| NM_001113391 | Cd247          | 0 | 1 | -0.208073  | 0.372026  | 0.298065  | No change |
| NM_001113395 | Gm16501        | 0 | 1 | -2.20807   | 0.829678  | 0         | No change |
| NM_001113401 | Eaf2           | 0 | 1 | 0.278914   | 1.18124   | 1.3689    | No change |
| NM_001113406 | Krtap11-1      | 0 | 1 | 1.69882    | 0         | 0.142442  | No change |
| NM_001113414 | Ebf3           | 0 | 1 | -0.564217  | 0.209246  | 0.129327  | No change |
| NM_001113418 | Ppara          | 0 | 1 | 0.0242176  | 1.59558   | 1.544     | No change |
| NM_001113468 | Vmn2r29        | 0 | 1 | 0.427013   | 1.77024   | 2.2724    | No change |
| NM_001113478 | Frrs1          | 0 | 1 | 0.487313   | 1.17706   | 1.57906   | No change |
| NM_001113481 | Sema4f         | 0 | 1 | -1.30118   | 0.178373  | 0.052498  | No change |
| NM_001113486 | Sept9          | 0 | 1 | 0.201522   | 7.97922   | 8.73563   | No change |
| NM_001113514 | Itga9          | 0 | 1 | 0.0112851  | 1.35888   | 1.30277   | No change |
| NM_001113529 | Csf1           | 0 | 1 | 0.288251   | 3.76948   | 4.38468   | No change |
| NM_001113548 | Adamts15       | 0 | 1 | 0.791927   | 0.551276  | 0.926528  | No change |
| NM_001113550 | 4833420G17Rik  | 0 | 1 | 0.26243    | 7.96027   | 9.09241   | No change |
| NM_001113556 | A530064D06Rik  | 0 | 1 | -1.88615   | 0.121841  | 0         | No change |
| NM_001113558 | Ucma           | 0 | 1 | 0.113855   | 0         | 0         | No change |
| NM_001113569 | Stxbp1         | 0 | 1 | -0.132583  | 2.08818   | 1.81046   | No change |
| NM_001113735 | Gm13057        | 0 | 1 | 0.113855   | 0         | 0         | No change |
| NM_001113736 | Gm13040        | 0 | 1 | 0.113855   | 0         | 0         | No change |
| NM_001114084 | Dgat2l6        | 0 | 1 | 0.113855   | 0         | 0         | No change |
| NM_001114087 | Pdlim7         | 0 | 1 | 0.498519   | 2.4223    | 3.27943   | No change |
| NM_001114116 | Syt3           | 0 | 1 | 0.554427   | 0.761517  | 1.07498   | No change |
| NM_001114153 | Rhox2g         | 0 | 1 | 0.113855   | 0         | 0         | No change |
| NM_001114339 | Pank1          | 0 | 1 | 0.160059   | 13.5962   | 14.4619   | No change |
| NM_001114529 | Gm4906         | 0 | 1 | 0.113855   | 0         | 0         | No change |
| NM_001114637 | Jmjd7          | 0 | 1 | 0.371013   | 2.0157    | 2.49166   | No change |
| NM_001114679 | 9930111J21Rik1 | 0 | 1 | 0.113855   | 3.08504   | 3.17791   | No change |
| NM_001115077 | Gm13125        | 0 | 1 | 0.113855   | 0         | 0         | No change |
| NM_001115087 | Fancf          | 0 | 1 | 0.528892   | 0.57768   | 0.807595  | No change |
| NM_001122594 | Phlpp2         | 0 | 1 | 0.175584   | 1.61643   | 1.73828   | No change |

|              |               |   |   |            |           |           |           |
|--------------|---------------|---|---|------------|-----------|-----------|-----------|
| NM_001122595 | A630033H20Rik | 0 | 1 | 1.33625    | 0.0465085 | 0.143726  | No change |
| NM_001122603 | Fcgbp         | 0 | 1 | 0.435783   | 0.0615196 | 0.0814778 | No change |
| NM_001122639 | Galnt9        | 0 | 1 | 1.05727    | 0.5361    | 1.10448   | No change |
| NM_001122647 | Mup10         | 0 | 1 | -1.47111   | 0.158034  | 0         | No change |
| NM_001122662 | Gm2016        | 0 | 1 | -1.88615   | 0.118391  | 0         | No change |
| NM_001122667 | Mkl2          | 0 | 1 | -0.0941823 | 5.88279   | 5.24496   | No change |
| NM_001122668 | E330014E10Rik | 0 | 1 | -0.886145  | 0.0329051 | 0         | No change |
| NM_001122678 | Gm3286        | 0 | 1 | -0.886145  | 0.0348291 | 0         | No change |
| NM_001122682 | Vmn1r132      | 0 | 1 | 0.113855   | 0         | 0         | No change |
| NM_001122733 | Kit           | 0 | 1 | 0.0849034  | 4.04894   | 4.08769   | No change |
| NM_001122759 | Pde7a         | 0 | 1 | -0.179462  | 13.4471   | 11.2997   | No change |
| NM_001122768 | Lrrc8d        | 0 | 1 | 0.0240581  | 4.10376   | 3.9711    | No change |
| NM_001122892 | Fyn           | 0 | 1 | -0.155332  | 3.77756   | 3.22539   | No change |
| NM_001122949 | Mpl           | 0 | 1 | 0.113855   | 0         | 0         | No change |
| NM_001122950 | Hoxa10        | 0 | 1 | 0.28378    | 0.741757  | 0.863751  | No change |
| NM_001122960 | Ccdc53        | 0 | 1 | -0.063023  | 6.86926   | 6.25165   | No change |
| NM_001122978 | Casp8ap2      | 0 | 1 | 0.0288853  | 5.75017   | 5.58386   | No change |
| NM_001122982 | Ccnc          | 0 | 1 | -0.242289  | 3.01142   | 2.41273   | No change |
| NM_001122993 | B3galt5       | 0 | 1 | -0.623111  | 0.0527877 | 0.0271884 | No change |
| NM_001123327 | Qser1         | 0 | 1 | 0.113855   | 5.29825   | 5.45775   | No change |
| NM_001123362 | Prdm12        | 0 | 1 | 0.113855   | 0         | 0         | No change |
| NM_001123394 | Ang3          | 0 | 1 | 0.113855   | 0         | 0         | No change |
| NM_001126047 | Sema4c        | 0 | 1 | 0.113855   | 4.26766   | 4.39614   | No change |
| NM_001126182 | Naip2         | 0 | 1 | -0.309357  | 0.850629  | 0.649624  | No change |
| NM_001126314 | Mboat4        | 0 | 1 | 1.28378    | 0.113692  | 0.312304  | No change |
| NM_001126315 | Gm13109       | 0 | 1 | 0.113855   | 0         | 0         | No change |
| NM_001126316 | Gm438         | 0 | 1 | -0.886145  | 0.0486683 | 0         | No change |
| NM_001126318 | Gm13011       | 0 | 1 | -1.88615   | 0.218245  | 0         | No change |
| NM_001126319 | Mup9          | 0 | 1 | -1.47111   | 0.193591  | 0         | No change |
| NM_001126320 | Gm11563       | 0 | 1 | 0.113855   | 0         | 0         | No change |
| NM_001126321 | Gm14743       | 0 | 1 | 0.113855   | 0         | 0         | No change |
| NM_001126322 | Gm11595       | 0 | 1 | 0.113855   | 0         | 0         | No change |
| NM_001126323 | Gm11565       | 0 | 1 | -2.47111   | 0.378355  | 0         | No change |
| NM_001126324 | Gm13083       | 0 | 1 | 0.113855   | 0         | 0         | No change |
| NM_001126325 | Gm13088       | 0 | 1 | 0.113855   | 0         | 0         | No change |
| NM_001126326 | Gm11756       | 0 | 1 | 0.113855   | 0         | 0         | No change |
| NM_001126330 | Trp73         | 0 | 1 | -1.41666   | 0.366342  | 0.120759  | No change |
| NM_001127169 | Tceal7        | 0 | 1 | 0.113855   | 0         | 0         | No change |
| NM_001127177 | Ptpn2         | 0 | 1 | -0.08843   | 5.50644   | 4.92901   | No change |
| NM_001127233 | Trp53         | 0 | 1 | 0.404756   | 3.46972   | 4.38125   | No change |
| NM_001127318 | Gucy2c        | 0 | 1 | -1.58658   | 0.212478  | 0.0547187 | No change |
| NM_001127324 | Ercc1         | 0 | 1 | -0.431141  | 4.94595   | 3.47376   | No change |
| NM_001127330 | Pparg         | 0 | 1 | -0.0560702 | 0.300239  | 0.270618  | No change |
| NM_001127354 | Gm11938       | 0 | 1 | 0.113855   | 0         | 0         | No change |
| NM_001127376 | Wisp3         | 0 | 1 | -0.886145  | 0.245744  | 0.101257  | No change |
| NM_001127685 | BC048943      | 0 | 1 | -2.20807   | 0.366323  | 0         | No change |
| NM_001127686 | Gm5736        | 0 | 1 | 0.113855   | 0         | 0         | No change |
| NM_001127725 | Sec145        | 0 | 1 | 0.113855   | 0.119286  | 0.122877  | No change |
| NM_001128080 | Tspan32       | 0 | 1 | 0.988324   | 0.220408  | 0.454086  | No change |
| NM_001128090 | Rergl         | 0 | 1 | 1.11385    | 0.306567  | 0.736857  | No change |
| NM_001128091 | Aadacl2       | 0 | 1 | 0.113855   | 0         | 0         | No change |
| NM_001128092 | Gm765         | 0 | 1 | 0.113855   | 0         | 0         | No change |
| NM_001128093 | Siah3         | 0 | 1 | -1.47111   | 0.154018  | 0         | No change |
| NM_001128132 | Cd200r3       | 0 | 1 | -1.47111   | 0.0859346 | 0         | No change |
| NM_001128145 | 5830411N06Rik | 0 | 1 | -2.05607   | 0.186407  | 0.0240023 | No change |
| NM_001128180 | Dlgap1        | 0 | 1 | 0.40198    | 1.23467   | 1.55597   | No change |
| NM_001128510 | Gm9513        | 0 | 1 | 0.113855   | 0         | 0         | No change |
| NM_001128599 | Opn4          | 0 | 1 | 0.113855   | 0         | 0         | No change |
| NM_001129803 | Pcp2          | 0 | 1 | -0.538222  | 1.39108   | 0.859772  | No change |
| NM_001130149 | Drosha        | 0 | 1 | -0.132785  | 2.1193    | 1.83757   | No change |
| NM_001130150 | Arhgef1       | 0 | 1 | 0.287503   | 1.72106   | 2.0023    | No change |
| NM_001130174 | Trnt2         | 0 | 1 | 0.735343   | 1.5072    | 2.42201   | No change |
| NM_001130187 | Smarcd2       | 0 | 1 | -0.147625  | 18.745    | 16.1041   | No change |
| NM_001130188 | Sgce          | 0 | 1 | 0.0932445  | 5.40854   | 5.49177   | No change |
| NM_001130193 | Best2         | 0 | 1 | 0.113855   | 0         | 0         | No change |
| NM_001130409 | Ptk2          | 0 | 1 | -0.0667174 | 15.7865   | 14.3462   | No change |
| NM_001130416 | Hdac6         | 0 | 1 | -0.0485808 | 25.0874   | 23.0889   | No change |
| NM_001130419 | Hpca          | 0 | 1 | -1.6935    | 0.556858  | 0.132374  | No change |
| NM_001130456 | Sema6b        | 0 | 1 | 0.738346   | 0.429052  | 0.691776  | No change |
| NM_001130693 | Gucy2d        | 0 | 1 | -2.20807   | 0.0788382 | 0         | No change |
| NM_001131020 | Gfap          | 0 | 1 | -0.886145  | 0.241245  | 0.110448  | No change |
| NM_001131068 | Rfesp         | 0 | 1 | 0.175255   | 7.45126   | 8.01062   | No change |
| NM_001134399 | Megf11        | 0 | 1 | 0.130928   | 0.961202  | 1.00207   | No change |
| NM_001134457 | Fam55c        | 0 | 1 | -0.212575  | 3.46839   | 2.84708   | No change |
| NM_001134458 | Ilr           | 0 | 1 | -1.62311   | 0.203252  | 0.0465269 | No change |
| NM_001134459 | Prickle2      | 0 | 1 | 0.335108   | 1.59237   | 1.9137    | No change |

|              |               |   |   |             |           |           |           |
|--------------|---------------|---|---|-------------|-----------|-----------|-----------|
| NM_001134480 | Plcxd2        | 0 | 1 | -0.203627   | 0.759907  | 0.626226  | No change |
| NM_001134644 | LOC100048885  | 0 | 1 | -1.47111    | 0.157855  | 0         | No change |
| NM_001134660 | Prr23a        | 0 | 1 | -0.886145   | 0.0658101 | 0         | No change |
| NM_001134661 | Gm6406        | 0 | 1 | 0.113855    | 0         | 0         | No change |
| NM_001134674 | Mup13         | 0 | 1 | -1.47111    | 0.141652  | 0         | No change |
| NM_001134675 | Mup7          | 0 | 1 | -1.20807    | 0.269866  | 0.0694976 | No change |
| NM_001134676 | Mup8          | 0 | 1 | -1.47111    | 0.141365  | 0         | No change |
| NM_001134697 | Ctxn3         | 0 | 1 | -1.14918    | 0.520803  | 0.195084  | No change |
| NM_001134717 | 2810006K23Rik | 0 | 1 | 0.426239    | 3.72026   | 4.76903   | No change |
| NM_001135093 | Klf14         | 0 | 1 | -0.886145   | 0.0703969 | 0.024172  | No change |
| NM_001135115 | Gm12250       | 0 | 1 | -0.301183   | 0.902758  | 0.690809  | No change |
| NM_001135127 | Mup19         | 0 | 1 | -1.47111    | 0.158754  | 0         | No change |
| NM_001135151 | Slc39a14      | 0 | 1 | 0.27813     | 2.80073   | 3.23475   | No change |
| NM_001135172 | C1qtnf7       | 0 | 1 | 0.368428    | 2.39289   | 2.94911   | No change |
| NM_001135567 | 1190007I07Rik | 0 | 1 | 0.538353    | 3.44738   | 4.79886   | No change |
| NM_001135611 | 3110062M04Rik | 0 | 1 | 0.257691    | 2.52124   | 2.87164   | No change |
| NM_001135688 | Ly6h          | 0 | 1 | -1.20807    | 0.283017  | 0.0728842 | No change |
| NM_001135991 | Krtap10-4     | 0 | 1 | 0.113855    | 0.0772649 | 0.0795909 | No change |
| NM_001136056 | Cntfr         | 0 | 1 | -0.0236487  | 0.348814  | 0.323383  | No change |
| NM_001136057 | Cpne6         | 0 | 1 | 0.113855    | 0         | 0         | No change |
| NM_001136058 | Crmp1         | 0 | 1 | -1.37157    | 0.297149  | 0.094183  | No change |
| NM_001136059 | Cyp1a1        | 0 | 1 | 0.544489    | 0.584985  | 0.82172   | No change |
| NM_001136063 | Gfra4         | 0 | 1 | -1.3191     | 2.05444   | 0.732561  | No change |
| NM_001136068 | Klrc1         | 0 | 1 | 0.113855    | 0         | 0         | No change |
| NM_001136070 | Eif2d         | 0 | 1 | 0.343056    | 5.29046   | 6.39434   | No change |
| NM_001136071 | Lsp1          | 0 | 1 | -0.116443   | 2.98045   | 2.60965   | No change |
| NM_001136074 | Nrl           | 0 | 1 | 0.113855    | 0.0362418 | 0.0373328 | No change |
| NM_001136075 | Numb          | 0 | 1 | 0.0725666   | 11.2958   | 11.3065   | No change |
| NM_001136078 | Pitpnm1       | 0 | 1 | -0.0787903  | 2.02923   | 1.82683   | No change |
| NM_001136081 | Ssrp1         | 0 | 1 | 0.13101     | 21.3868   | 22.2945   | No change |
| NM_001136084 | Tph1          | 0 | 1 | 0.435783    | 0.120715  | 0.165799  | No change |
| NM_001136089 | Anxa10        | 0 | 1 | 0.113855    | 0         | 0         | No change |
| NM_001136091 | Tcirg1        | 0 | 1 | -0.00398168 | 3.94097   | 3.73911   | No change |
| NM_001136104 | Abl2          | 0 | 1 | 0.156973    | 5.73516   | 6.08726   | No change |
| NM_001136117 | C2cd4d        | 0 | 1 | -0.886145   | 0.0529582 | 0         | No change |
| NM_001136181 | Hsbp111       | 0 | 1 | 0.0456833   | 10.7904   | 10.5996   | No change |
| NM_001136227 | Rtkn          | 0 | 1 | 0.200566    | 3.55609   | 3.89208   | No change |
| NM_001136236 | Fcrl1         | 0 | 1 | 1.28378     | 0.263276  | 0.658633  | No change |
| NM_001136237 | Slc39a5       | 0 | 1 | 0.698817    | 0.179528  | 0.295893  | No change |
| NM_001136471 | Ccdc9         | 0 | 1 | -0.227182   | 8.46021   | 6.87325   | No change |
| NM_001136476 | Slx           | 0 | 1 | -0.886145   | 0.0754253 | 0         | No change |
| NM_001136496 | Zfp935        | 0 | 1 | 0.258245    | 6.56172   | 7.47388   | No change |
| NM_001139509 | Nr4a2         | 0 | 1 | 0.936977    | 0.276376  | 0.521944  | No change |
| NM_001139511 | Raly          | 0 | 1 | 0.171659    | 12.9121   | 13.8463   | No change |
| NM_001139519 | Zbp1          | 0 | 1 | 0.492366    | 0.80312   | 1.10306   | No change |
| NM_001139520 | Samhd1        | 0 | 1 | 0.161587    | 5.66581   | 6.03331   | No change |
| NM_001141933 | Nkain4        | 0 | 1 | 0.933283    | 1.28912   | 2.40686   | No change |
| NM_001141965 | Naa20         | 0 | 1 | -0.0271891  | 12.3885   | 11.567    | No change |
| NM_001141971 | 5730494N06Rik | 0 | 1 | -0.0274503  | 18.9576   | 17.7019   | No change |
| NM_001142322 | Myo9b         | 0 | 1 | 0.0710599   | 4.56533   | 4.56503   | No change |
| NM_001142335 | Lmo2          | 0 | 1 | 0.13939     | 2.52344   | 2.64667   | No change |
| NM_001142357 | Alg12         | 0 | 1 | -0.0617838  | 8.24149   | 7.51262   | No change |
| NM_001142580 | Vipar         | 0 | 1 | 0.059486    | 19.171    | 19.0167   | No change |
| NM_001142647 | Tmem194b      | 0 | 1 | -0.246547   | 1.93021   | 1.54412   | No change |
| NM_001142690 | Dmrta1c2      | 0 | 1 | -2.88615    | 0.302825  | 0         | No change |
| NM_001142691 | Dmrta1c1      | 0 | 1 | -2.88615    | 0.302825  | 0         | No change |
| NM_001142701 | Hmha1         | 0 | 1 | -0.255379   | 1.0823    | 0.859006  | No change |
| NM_001142706 | Cfb           | 0 | 1 | 0.123874    | 7.26656   | 7.53766   | No change |
| NM_001142724 | Kbtbd12       | 0 | 1 | -1.62311    | 0.382695  | 0.0876034 | No change |
| NM_001142734 | Gm8994        | 0 | 1 | 0.182568    | 3.58877   | 3.87936   | No change |
| NM_001142775 | Skint7        | 0 | 1 | 0.113855    | 0         | 0         | No change |
| NM_001142809 | Slc6a8        | 0 | 1 | 0.440356    | 1.09005   | 1.41264   | No change |
| NM_001142916 | Plod2         | 0 | 1 | -0.387043   | 1.38973   | 1.00596   | No change |
| NM_001142918 | Tcf7l2        | 0 | 1 | -0.400718   | 0.822484  | 0.587884  | No change |
| NM_001142943 | Zfp949        | 0 | 1 | 0.119591    | 4.98234   | 5.15286   | No change |
| NM_001142957 | Zfp955b       | 0 | 1 | -0.12061    | 10.7468   | 9.40648   | No change |
| NM_001142965 | 6430704M03Rik | 0 | 1 | 0.113855    | 0.1085    | 0.111766  | No change |
| NM_001142968 | BC024139      | 0 | 1 | 0.113855    | 1.29403   | 1.33299   | No change |
| NM_001142969 | A630073D07Rik | 0 | 1 | 0.113855    | 0         | 0         | No change |
| NM_001143671 | Fam70b        | 0 | 1 | -0.208073   | 0.227941  | 0.176102  | No change |
| NM_001143686 | Apol11b       | 0 | 1 | 0.113855    | 0.135523  | 0.139603  | No change |
| NM_001143689 | H2-Gs10       | 0 | 1 | 0.0168304   | 4.74207   | 4.56451   | No change |
| NM_001143802 | Fam196a       | 0 | 1 | 0.163323    | 1.27753   | 1.36243   | No change |
| NM_001143956 | Mettl11b      | 0 | 1 | 0.872847    | 0.794222  | 1.43173   | No change |
| NM_001144855 | Ppfa4         | 0 | 1 | -0.425304   | 1.05682   | 0.745481  | No change |
| NM_001144948 | Gm12886       | 0 | 1 | 1.11385     | 0         | 0.0624813 | No change |

|              |               |   |   |              |           |           |           |
|--------------|---------------|---|---|--------------|-----------|-----------|-----------|
| NM_001144953 | Vva5b2        | 0 | 1 | 0.698817     | 0.0153949 | 0.0317168 | No change |
| NM_001145013 | Rfp14         | 0 | 1 | 0.113855     | 0.0482304 | 0.0496823 | No change |
| NM_001145015 | Arhgap40      | 0 | 1 | 1.11385      | 0.103096  | 0.247799  | No change |
| NM_001145034 | Gm13889       | 0 | 1 | -0.886145    | 1.34959   | 0.667306  | No change |
| NM_001145060 | Glyat13       | 0 | 1 | -1.47111     | 0.159663  | 0         | No change |
| NM_001145096 | Hhla1         | 0 | 1 | -1.88615     | 0.092431  | 0         | No change |
| NM_001145162 | Ube2q11       | 0 | 1 | -0.301183    | 0.0779563 | 0.0535354 | No change |
| NM_001145192 | A330050F15Rik | 0 | 1 | 0.113855     | 0         | 0         | No change |
| NM_001145198 | 1500009L16Rik | 0 | 1 | -0.0313431   | 5.42834   | 5.05062   | No change |
| NM_001145259 | 1700018A14Rik | 0 | 1 | -1.37157     | 1.27427   | 0.403887  | No change |
| NM_001145390 | Gm766         | 0 | 1 | -1.47111     | 0.0944989 | 0         | No change |
| NM_001145403 | Kcnt1         | 0 | 1 | 0.292192     | 0.683808  | 0.799581  | No change |
| NM_001145552 | 2310045N01Rik | 0 | 1 | 0.0549611    | 5.69159   | 5.62363   | No change |
| NM_001145644 | Phgr1         | 0 | 1 | 0.113855     | 0         | 0         | No change |
| NM_001145801 | Ctla2b        | 0 | 1 | 0.461778     | 1.27598   | 1.68994   | No change |
| NM_001145806 | Capn8         | 0 | 1 | 0.0720346    | 0.954313  | 0.954129  | No change |
| NM_001145826 | Specc11       | 0 | 1 | -0.115707    | 13.7702   | 12.0964   | No change |
| NM_001145830 | Plcb1         | 0 | 1 | 0.0649452    | 0.886349  | 0.882255  | No change |
| NM_001145874 | Muc20         | 0 | 1 | -0.125816    | 1.84052   | 1.60274   | No change |
| NM_001145878 | Gm5082        | 0 | 1 | -2.20807     | 0.194673  | 0         | No change |
| NM_001145884 | Itgb5         | 0 | 1 | -0.185025    | 6.90134   | 5.77478   | No change |
| NM_001145888 | Zfat          | 0 | 1 | 0.0279547    | 2.6829    | 2.60299   | No change |
| NM_001145898 | BC052040      | 0 | 1 | 0.557461     | 0.603838  | 0.855272  | No change |
| NM_001145900 | Btbd6         | 0 | 1 | 0.203122     | 8.21569   | 9.00552   | No change |
| NM_001145924 | 5730528L13Rik | 0 | 1 | -0.533843    | 1.86497   | 1.21113   | No change |
| NM_001145926 | C530028O21Rik | 0 | 1 | 0.92121      | 0.235449  | 0.450426  | No change |
| NM_001145953 | Lgals3        | 0 | 1 | 0.591177     | 2.47841   | 3.57423   | No change |
| NM_001145955 | Pigv          | 0 | 1 | 0.205777     | 5.02321   | 5.51711   | No change |
| NM_001145965 | Dlgap2        | 0 | 1 | -1.47111     | 0.0316068 | 0         | No change |
| NM_001145967 | Atg4c         | 0 | 1 | 0.268775     | 6.13178   | 7.03531   | No change |
| NM_001146005 | Gpr77         | 0 | 1 | 1.11385      | 0.121947  | 0.272173  | No change |
| NM_001146013 | Slc6a5        | 0 | 1 | 0.113855     | 0         | 0         | No change |
| NM_001146024 | Zfp444        | 0 | 1 | -0.0837451   | 1.99536   | 1.79022   | No change |
| NM_001146031 | Nrcam         | 0 | 1 | -0.886145    | 0.123065  | 0.0585093 | No change |
| NM_001146059 | Als2cl        | 0 | 1 | 0.209012     | 1.19168   | 1.31222   | No change |
| NM_001146084 | Fastkd5       | 0 | 1 | 0.172407     | 3.7443    | 4.01772   | No change |
| NM_001146087 | Il1f5         | 0 | 1 | -0.471108    | 0.0754253 | 0.0388479 | No change |
| NM_001146089 | Ascc3         | 0 | 1 | -0.0555868   | 10.4209   | 9.54397   | No change |
| NM_001146107 | Gm10696       | 0 | 1 | -1.88615     | 0.093048  | 0         | No change |
| NM_001146153 | Homer3        | 0 | 1 | 0.0235524    | 12.6559   | 12.2441   | No change |
| NM_001146198 | Nkx2-1        | 0 | 1 | 1.11385      | 0         | 0.0317238 | No change |
| NM_001146199 | Ptpn21        | 0 | 1 | -0.0688375   | 2.83182   | 2.56857   | No change |
| NM_001146200 | Pik3cg        | 0 | 1 | 0.113855     | 0.61982   | 0.638479  | No change |
| NM_001146268 | Pdgfrb        | 0 | 1 | 0.173356     | 1.21026   | 1.29974   | No change |
| NM_001146287 | Cables1       | 0 | 1 | -0.278463    | 0.416948  | 0.322125  | No change |
| NM_001146295 | Celf4         | 0 | 1 | -3.05607     | 0.246919  | 0         | No change |
| NM_001146298 | Wac           | 0 | 1 | 0.0242613    | 12.0376   | 11.6525   | No change |
| NM_001146307 | Clnka         | 0 | 1 | 0.92121      | 0.0869351 | 0.179104  | No change |
| NM_001146325 | Tigit         | 0 | 1 | 0.698817     | 0.217112  | 0.372746  | No change |
| NM_001146329 | Sbk2          | 0 | 1 | 2.43578      | 0         | 0.252119  | No change |
| NM_001146330 | Gpr52         | 0 | 1 | -0.371572    | 0.834262  | 0.594953  | No change |
| NM_001146348 | Eng           | 0 | 1 | 0.286691     | 1.09721   | 1.27675   | No change |
| NM_001159284 | Smtn          | 0 | 1 | 0.425056     | 2.2017    | 2.81907   | No change |
| NM_001159299 | Itih4         | 0 | 1 | 1.69882      | 0         | 0.0456976 | No change |
| NM_001159301 | Lgals9        | 0 | 1 | 0.152329     | 5.13478   | 5.43361   | No change |
| NM_001159317 | Il1rap        | 0 | 1 | 0.44643      | 0.44952   | 0.587721  | No change |
| NM_001159321 | Grid2ip       | 0 | 1 | 0.113855     | 0.0182204 | 0.0187689 | No change |
| NM_001159329 | Gtpbp8        | 0 | 1 | 0.0891928    | 7.39263   | 7.48501   | No change |
| NM_001159344 | Casz1         | 0 | 1 | -0.0101339   | 0.734899  | 0.693937  | No change |
| NM_001159351 | Ube2v2        | 0 | 1 | 0.100703     | 6.64778   | 6.78565   | No change |
| NM_001159354 | Magj3         | 0 | 1 | 0.158943     | 6.6672    | 7.08629   | No change |
| NM_001159361 | Dip2b         | 0 | 1 | -0.000639979 | 5.73086   | 5.45238   | No change |
| NM_001159364 | Cep97         | 0 | 1 | -0.16178     | 2.83817   | 2.40386   | No change |
| NM_001159374 | Krt32         | 0 | 1 | 0.113855     | 0         | 0         | No change |
| NM_001159389 | Rfx6          | 0 | 1 | -3.05607     | 0.16128   | 0         | No change |
| NM_001159401 | Upp1          | 0 | 1 | -0.623111    | 0.221952  | 0.114317  | No change |
| NM_001159407 | B3gnt5        | 0 | 1 | -0.471108    | 0.0286096 | 0.0147354 | No change |
| NM_001159415 | Ces3b         | 0 | 1 | -1.88615     | 0.254752  | 0.0374888 | No change |
| NM_001159419 | Sidt1         | 0 | 1 | 0.435783     | 0.049022  | 0.0673303 | No change |
| NM_001159421 | Ccdc58        | 0 | 1 | -0.0358923   | 5.02939   | 4.66271   | No change |
| NM_001159424 | Il12a         | 0 | 1 | 1.11385      | 0         | 0.0550967 | No change |
| NM_001159487 | Rbp4          | 0 | 1 | -0.564217    | 0.392478  | 0.231025  | No change |
| NM_001159492 | Gpatch8       | 0 | 1 | -0.0553127   | 7.27648   | 6.66503   | No change |
| NM_001159505 | Tnfsf13       | 0 | 1 | -0.406402    | 4.49095   | 3.2126    | No change |
| NM_001159507 | Grip2         | 0 | 1 | -0.0381483   | 0.121959  | 0.111672  | No change |
| NM_001159519 | Pfas          | 0 | 1 | 0.0763192    | 6.80625   | 6.83079   | No change |

|              |               |   |   |             |           |           |           |
|--------------|---------------|---|---|-------------|-----------|-----------|-----------|
| NM_001159520 | Pax3          | 0 | 1 | 0.113855    | 0         | 0         | No change |
| NM_001159521 | Plxnb2        | 0 | 1 | -0.0160609  | 22.3858   | 21.073    | No change |
| NM_001159523 | Shd           | 0 | 1 | 0.113855    | 0.090746  | 0.0934778 | No change |
| NM_001159533 | Cacna1c       | 0 | 1 | 0.28378     | 0.668984  | 0.776354  | No change |
| NM_001159559 | Xrcc6bp1      | 0 | 1 | 0.0649452   | 1.89418   | 1.88392   | No change |
| NM_001159564 | Itgb6         | 0 | 1 | 0.265858    | 0.88291   | 1.01217   | No change |
| NM_001159573 | Fip1l1        | 0 | 1 | 0.285679    | 5.69845   | 6.61539   | No change |
| NM_001159581 | Mutyh         | 0 | 1 | 0.557461    | 0.963497  | 1.36469   | No change |
| NM_001159593 | Slc20a1       | 0 | 1 | 0.13247     | 2.62341   | 2.73794   | No change |
| NM_001159598 | Axin1         | 0 | 1 | -0.0540083  | 8.27734   | 7.58782   | No change |
| NM_001159602 | Tmem8c        | 0 | 1 | 0.113855    | 0         | 0         | No change |
| NM_001159630 | Scmh1         | 0 | 1 | -0.26279    | 7.43005   | 5.88939   | No change |
| NM_001159632 | Atp6v1c2      | 0 | 1 | 0.286494    | 5.10587   | 5.93388   | No change |
| NM_001159649 | Lax1          | 0 | 1 | -0.0787903  | 0.911211  | 0.817527  | No change |
| NM_001159650 | Crybb3        | 0 | 1 | 0.113855    | 0.183886  | 0.189422  | No change |
| NM_001159657 | 5430407P10Rik | 0 | 1 | 0.170438    | 0.461415  | 0.49511   | No change |
| NM_001159658 | Aqp12         | 0 | 1 | 0.113855    | 0         | 0         | No change |
| NM_001159693 | Zar1l         | 0 | 1 | 0.113855    | 0         | 0         | No change |
| NM_001159696 | Tcfap2c       | 0 | 1 | 0.719576    | 0.551924  | 0.878651  | No change |
| NM_001159711 | Ly96          | 0 | 1 | 0.765932    | 1.65029   | 2.7461    | No change |
| NM_001159714 | Prpf31        | 0 | 1 | 0.0536197   | 5.97878   | 5.90598   | No change |
| NM_001159717 | Sept2         | 0 | 1 | 0.026392    | 49.3135   | 47.8086   | No change |
| NM_001159725 | Rab17         | 0 | 1 | 0.712492    | 1.51992   | 2.39457   | No change |
| NM_001159730 | Pdc           | 0 | 1 | -1.47111    | 0.111777  | 0         | No change |
| NM_001159731 | Rxrg          | 0 | 1 | -2.20807    | 0.166332  | 0         | No change |
| NM_001159738 | Ccl20         | 0 | 1 | 0.113855    | 0         | 0         | No change |
| NM_001159745 | St8sia4       | 0 | 1 | -0.0496439  | 1.34986   | 1.236     | No change |
| NM_001159748 | Serpib8       | 0 | 1 | 0.698817    | 0.509534  | 0.816469  | No change |
| NM_001159769 | Nr5a2         | 0 | 1 | -0.400718   | 0.172555  | 0.1185    | No change |
| NM_001159775 | Olf391-ps     | 0 | 1 | 0.113855    | 0         | 0         | No change |
| NM_001159850 | Kcnk2         | 0 | 1 | 0.00693961  | 1.41187   | 1.34898   | No change |
| NM_001159864 | Kctd18        | 0 | 1 | -0.0493755  | 5.70336   | 5.24362   | No change |
| NM_001159866 | Uchl5         | 0 | 1 | -0.254533   | 5.31748   | 4.23442   | No change |
| NM_001159888 | Ociad1        | 0 | 1 | 0.180224    | 30.1627   | 32.5358   | No change |
| NM_001159925 | Pax4          | 0 | 1 | 0.113855    | 0         | 0         | No change |
| NM_001159934 | Oas1h         | 0 | 1 | -0.471108   | 0.10632   | 0.0547605 | No change |
| NM_001159940 | 2310007B03Rik | 0 | 1 | -0.6935     | 0.18165   | 0.093559  | No change |
| NM_001160112 | Foxg1         | 0 | 1 | 0.113855    | 0         | 0         | No change |
| NM_001160139 | Kcnq5         | 0 | 1 | -1.62311    | 0.089862  | 0.0205705 | No change |
| NM_001160149 | Cgref1        | 0 | 1 | 0.393963    | 0.72655   | 0.921135  | No change |
| NM_001160163 | Neu2          | 0 | 1 | 0.884373    | 0.649439  | 1.17073   | No change |
| NM_001160178 | Klhdc7b       | 0 | 1 | -1.47111    | 0.0766699 | 0         | No change |
| NM_001160208 | Blzf1         | 0 | 1 | -0.155606   | 9.5657    | 8.17178   | No change |
| NM_001160211 | Cnih3         | 0 | 1 | -1.47111    | 0.0522044 | 0         | No change |
| NM_001160214 | Smek1         | 0 | 1 | -0.00398168 | 13.9113   | 13.2049   | No change |
| NM_001160251 | Zfp281        | 0 | 1 | -0.192984   | 5.64149   | 4.69533   | No change |
| NM_001160252 | Cabp2         | 0 | 1 | 0.113855    | 0         | 0         | No change |
| NM_001160261 | Fam78b        | 0 | 1 | 0.180969    | 0.298727  | 0.323106  | No change |
| NM_001160265 | Cyp2w1        | 0 | 1 | -0.886145   | 0.0460932 | 0         | No change |
| NM_001160307 | Serpib10-ps   | 0 | 1 | -0.623111   | 0.0841194 | 0.0433259 | No change |
| NM_001160316 | Nfasc         | 0 | 1 | -0.14918    | 0.126175  | 0.107037  | No change |
| NM_001160353 | Grm2          | 0 | 1 | 0.113855    | 0         | 0         | No change |
| NM_001160359 | A130010J15Rik | 0 | 1 | 0.228719    | 3.31696   | 3.70154   | No change |
| NM_001160363 | 5430405G05Rik | 0 | 1 | -1.47111    | 0.097133  | 0         | No change |
| NM_001160369 | A830018L16Rik | 0 | 1 | -0.471108   | 0.049977  | 0.0257408 | No change |
| NM_001160385 | Tmem196       | 0 | 1 | 0.528892    | 0.119337  | 0.184395  | No change |
| NM_001160399 | Ccdc112       | 0 | 1 | -0.208073   | 2.58767   | 2.12733   | No change |
| NM_001160403 | Il1rapl1      | 0 | 1 | 0.528892    | 0.0508893 | 0.078632  | No change |
| NM_001160406 | Gfi1b         | 0 | 1 | -0.471108   | 0.420759  | 0.275816  | No change |
| NM_001160412 | Triml2        | 0 | 1 | -0.886145   | 0.0475071 | 0         | No change |
| NM_001160422 | Optc          | 0 | 1 | 0.735343    | 1.48917   | 2.39303   | No change |
| NM_001160424 | Tgm7          | 0 | 1 | -0.301183   | 0.0984827 | 0.0676316 | No change |
| NM_001160711 | Cd300lg       | 0 | 1 | -0.383645   | 0.586727  | 0.420445  | No change |
| NM_001161111 | Pqhc3         | 0 | 1 | 0.229332    | 0.755293  | 0.84876   | No change |
| NM_001161365 | Rin3          | 0 | 1 | -0.48881    | 0.742599  | 0.49722   | No change |
| NM_001161428 | Unc93b1       | 0 | 1 | 0.254032    | 3.39368   | 3.85624   | No change |
| NM_001161431 | Slitrk2       | 0 | 1 | -1.47111    | 0.152324  | 0.04615   | No change |
| NM_001161432 | Eda2r         | 0 | 1 | 0.259706    | 0.669425  | 0.764531  | No change |
| NM_001161608 | Gm13272       | 0 | 1 | 1.03139     | 0.687477  | 1.41634   | No change |
| NM_001161609 | Gm13285       | 0 | 1 | 0.239386    | 1.26945   | 1.43843   | No change |
| NM_001161610 | Gm13287       | 0 | 1 | 0.92121     | 0.888617  | 1.69997   | No change |
| NM_001161621 | Abp1          | 0 | 1 | 0.542698    | 0.615445  | 0.862202  | No change |
| NM_001161667 | Acox2         | 0 | 1 | 1.52889     | 0.0569387 | 0.205285  | No change |
| NM_001161714 | Tgm1          | 0 | 1 | -0.267235   | 1.39234   | 1.09525   | No change |
| NM_001161737 | Siva1         | 0 | 1 | 0.0863741   | 6.17382   | 6.23738   | No change |
| NM_001161741 | Reg3d         | 0 | 1 | 0.113855    | 0         | 0         | No change |

|              |               |   |   |             |           |           |           |
|--------------|---------------|---|---|-------------|-----------|-----------|-----------|
| NM_001161747 | Palm          | 0 | 1 | -0.656663   | 1.57701   | 0.940493  | No change |
| NM_001161763 | Fmo5          | 0 | 1 | 0.407586    | 0.817237  | 1.03505   | No change |
| NM_001161782 | Trim32        | 0 | 1 | -0.0922678  | 7.35563   | 6.56529   | No change |
| NM_001161790 | Mefv          | 0 | 1 | 0.698817    | 0.0214506 | 0.0441927 | No change |
| NM_001161796 | Gucy1b3       | 0 | 1 | 0.180969    | 0.883553  | 0.954549  | No change |
| NM_001161797 | Phactr4       | 0 | 1 | -0.0082923  | 4.19182   | 3.96618   | No change |
| NM_001161798 | Mthfr         | 0 | 1 | -0.154302   | 9.0366    | 7.72771   | No change |
| NM_001161799 | Mfap2         | 0 | 1 | 0.294427    | 0.925713  | 1.08981   | No change |
| NM_001161802 | Zscan4e       | 0 | 1 | -1.88615    | 0.119816  | 0         | No change |
| NM_001161822 | Rgs17         | 0 | 1 | -0.803683   | 0.280814  | 0.149017  | No change |
| NM_001161832 | T2            | 0 | 1 | -1.6935     | 0.238538  | 0.0409532 | No change |
| NM_001161842 | Il18r1        | 0 | 1 | 0.988324    | 0.181587  | 0.374106  | No change |
| NM_001161847 | Sgk1          | 0 | 1 | 0.413415    | 3.10222   | 3.93941   | No change |
| NM_001161853 | Smarcb1       | 0 | 1 | -0.031862   | 19.5397   | 18.19     | No change |
| NM_001161854 | Csde1         | 0 | 1 | -0.00615199 | 88.8297   | 84.1989   | No change |
| NM_001162381 | Fam166b       | 0 | 1 | -0.301183   | 1.04183   | 0.790774  | No change |
| NM_001162412 | Cysltr2       | 0 | 1 | 0.698817    | 0.199693  | 0.329128  | No change |
| NM_001162415 | Pfkfb2        | 0 | 1 | 0.0304388   | 16.7951   | 16.3276   | No change |
| NM_001162423 | Arhgap4       | 0 | 1 | 0.569534    | 0.720669  | 1.02621   | No change |
| NM_001162432 | Lck           | 0 | 1 | 0.113855    | 1.0417    | 1.07306   | No change |
| NM_001162465 | Dtnb          | 0 | 1 | -0.153467   | 9.94345   | 8.50517   | No change |
| NM_001162475 | Stra6         | 0 | 1 | -0.333604   | 0.352621  | 0.259454  | No change |
| NM_001162489 | Heatr7a       | 0 | 1 | -0.0225644  | 3.61351   | 3.38517   | No change |
| NM_001162523 | Ceacam12      | 0 | 1 | -0.886145   | 0.0463076 | 0         | No change |
| NM_001162540 | Stk32c        | 0 | 1 | -0.21372    | 2.33173   | 1.90629   | No change |
| NM_001162903 | 2010109K11Rik | 0 | 1 | 0.113855    | 2.16375   | 2.22889   | No change |
| NM_001162909 | Ncrna00085    | 0 | 1 | 0.225646    | 13.2809   | 14.7882   | No change |
| NM_001162910 | Gm3604        | 0 | 1 | 0.190476    | 1.28928   | 1.40188   | No change |
| NM_001162911 | Zfp934        | 0 | 1 | -0.514176   | 1.55913   | 1.02788   | No change |
| NM_001162918 | Ccdc90b       | 0 | 1 | -0.252928   | 6.81069   | 5.42997   | No change |
| NM_001162925 | Nudt17        | 0 | 1 | -0.886145   | 0.782481  | 0.37615   | No change |
| NM_001162932 | A630055G03Rik | 0 | 1 | -1.40072    | 0.35415   | 0.115203  | No change |
| NM_001162934 | Ctxn2         | 0 | 1 | -2.47111    | 0.338315  | 0         | No change |
| NM_001162937 | Bet3l         | 0 | 1 | 0.113855    | 0         | 0         | No change |
| NM_001162938 | Pydc3         | 0 | 1 | -1.88615    | 0.163325  | 0.0240345 | No change |
| NM_001162940 | Gm10081       | 0 | 1 | 0.113855    | 0         | 0         | No change |
| NM_001162944 | Gm10318       | 0 | 1 | 0.113855    | 0.0749386 | 0.0771946 | No change |
| NM_001162950 | Hif3a         | 0 | 1 | 0.0358523   | 0.564315  | 0.550162  | No change |
| NM_001162957 | Rsph4a        | 0 | 1 | 0.243138    | 0.591913  | 0.668738  | No change |
| NM_001162970 | Aim1l         | 0 | 1 | 0.265858    | 0.117106  | 0.135711  | No change |
| NM_001162983 | Lrrc38        | 0 | 1 | -0.886145   | 0.0299497 | 0         | No change |
| NM_001162996 | Eml2          | 0 | 1 | 0.443162    | 2.37976   | 3.08813   | No change |
| NM_001162999 | Fnip2         | 0 | 1 | 0.183303    | 3.57551   | 3.86528   | No change |
| NM_001163006 | 2310028O11Rik | 0 | 1 | -0.0695125  | 16.9243   | 15.3496   | No change |
| NM_001163007 | Tnik          | 0 | 1 | -0.141274   | 3.5677    | 3.07777   | No change |
| NM_001163010 | Mup1          | 0 | 1 | -1.47111    | 0.175108  | 0         | No change |
| NM_001163014 | Gp6           | 0 | 1 | -0.886145   | 0.0604973 | 0         | No change |
| NM_001163015 | Gprasp2       | 0 | 1 | 0.12549     | 9.00855   | 9.35504   | No change |
| NM_001163018 | Suz12         | 0 | 1 | 0.189188    | 8.744     | 9.49095   | No change |
| NM_001163027 | Hctr1         | 0 | 1 | 0.85082     | 0.161252  | 0.298991  | No change |
| NM_001163032 | Synpr         | 0 | 1 | 0.765932    | 0.15738   | 0.270196  | No change |
| NM_001163104 | Fam46d        | 0 | 1 | -0.0420161  | 11.5304   | 10.6587   | No change |
| NM_001163105 | Krtap27-1     | 0 | 1 | -1.47111    | 0.228877  | 0         | No change |
| NM_001163138 | Card6         | 0 | 1 | -0.391673   | 2.43025   | 1.75873   | No change |
| NM_001163141 | Krtap24-1     | 0 | 1 | -3.05607    | 0.354897  | 0         | No change |
| NM_001163143 | C2cd4a        | 0 | 1 | 0.113855    | 0         | 0         | No change |
| NM_001163145 | 1810041L15Rik | 0 | 1 | -1.37157    | 0.15312   | 0.048532  | No change |
| NM_001163155 | Col4a5        | 0 | 1 | 0.276126    | 1.79306   | 2.06823   | No change |
| NM_001163161 | Clec4d        | 0 | 1 | 0.113855    | 0.104566  | 0.107713  | No change |
| NM_001163170 | Lix1l         | 0 | 1 | 0.332865    | 3.36104   | 4.03449   | No change |
| NM_001163192 | Ly6g6f        | 0 | 1 | 0.113855    | 0.0652556 | 0.06722   | No change |
| NM_001163194 | Sfta2         | 0 | 1 | 0.113855    | 0         | 0         | No change |
| NM_001163218 | Prl3c1        | 0 | 1 | -2.20807    | 0.327197  | 0         | No change |
| NM_001163239 | Nqo2          | 0 | 1 | -0.234068   | 5.11155   | 4.13308   | No change |
| NM_001163247 | Birc7         | 0 | 1 | -0.886145   | 0.0591621 | 0         | No change |
| NM_001163262 | 4933407C03Rik | 0 | 1 | 0.35343     | 2.3703    | 2.88559   | No change |
| NM_001163266 | Lsm10         | 0 | 1 | -0.297776   | 12.0308   | 9.29476   | No change |
| NM_001163268 | Lpar5         | 0 | 1 | -0.14918    | 0.239002  | 0.196957  | No change |
| NM_001163270 | Baiap3        | 0 | 1 | 0.205278    | 1.59041   | 1.74648   | No change |
| NM_001163282 | Gdf1          | 0 | 1 | -0.234068   | 0.332602  | 0.26355   | No change |
| NM_001163310 | Rit1          | 0 | 1 | 0.155849    | 6.9575    | 7.37953   | No change |
| NM_001163311 | Srr           | 0 | 1 | 0.0772362   | 15.9935   | 16.0615   | No change |
| NM_001163316 | Get4          | 0 | 1 | -0.227182   | 9.64419   | 7.83515   | No change |
| NM_001163317 | Clrn2         | 0 | 1 | -0.886145   | 0.0738273 | 0         | No change |
| NM_001163328 | Raly1         | 0 | 1 | -0.564217   | 0.201093  | 0.118369  | No change |
| NM_001163332 | Cttnbp2nl     | 0 | 1 | 0.0331235   | 6.33834   | 6.17301   | No change |

|              |               |   |   |            |           |           |           |
|--------------|---------------|---|---|------------|-----------|-----------|-----------|
| NM_001163336 | Atp2a3        | 0 | 1 | -0.183127  | 1.3106    | 1.09592   | No change |
| NM_001163348 | Ntng1         | 0 | 1 | 1.11385    | 0.080741  | 0.180205  | No change |
| NM_001163353 | Gm12171       | 0 | 1 | 0.113855   | 0         | 0         | No change |
| NM_001163357 | Gm12169       | 0 | 1 | 0.113855   | 0         | 0         | No change |
| NM_001163358 | Dppa1         | 0 | 1 | 0.113855   | 0         | 0         | No change |
| NM_001163388 | 2810002N01Rik | 0 | 1 | -0.0436865 | 5.80774   | 5.35284   | No change |
| NM_001163394 | Evl           | 0 | 1 | -0.493828  | 2.01129   | 1.34834   | No change |
| NM_001163416 | Ptx4          | 0 | 1 | 0.698817   | 0.0467111 | 0.0962345 | No change |
| NM_001163421 | Tatdn3        | 0 | 1 | 0.0646673  | 9.89262   | 9.84693   | No change |
| NM_001163427 | 1700040I03Rik | 0 | 1 | -0.27471   | 4.5732    | 3.58291   | No change |
| NM_001163432 | Clk2          | 0 | 1 | 0.023657   | 7.94506   | 7.68633   | No change |
| NM_001163454 | Prorsd1       | 0 | 1 | 0.297938   | 5.50207   | 6.44364   | No change |
| NM_001163455 | Tbck          | 0 | 1 | 0.34832    | 3.11935   | 3.78404   | No change |
| NM_001163457 | Mttp          | 0 | 1 | 0.184967   | 7.73278   | 8.36889   | No change |
| NM_001163472 | Cyp2d22       | 0 | 1 | -0.301183  | 2.69017   | 2.07189   | No change |
| NM_001163473 | 1810010H24Rik | 0 | 1 | 0.765932   | 1.2683    | 2.09036   | No change |
| NM_001163481 | Fkbp10        | 0 | 1 | 0.293561   | 2.60008   | 3.03731   | No change |
| NM_001163486 | Hsd17b13      | 0 | 1 | 0.113855   | 0         | 0         | No change |
| NM_001163498 | Rundc2a       | 0 | 1 | -0.108538  | 2.77615   | 2.44268   | No change |
| NM_001163503 | 2010001E11Rik | 0 | 1 | -1.30118   | 0.213501  | 0.0628367 | No change |
| NM_001163504 | Nr1h4         | 0 | 1 | -0.623111  | 0.127351  | 0.0655925 | No change |
| NM_001163510 | Kcnn4         | 0 | 1 | -0.523575  | 0.444776  | 0.281948  | No change |
| NM_001163518 | 2410075B13Rik | 0 | 1 | -0.293055  | 3.37783   | 2.61707   | No change |
| NM_001163522 | Emcn          | 0 | 1 | 0.251358   | 1.86039   | 2.11294   | No change |
| NM_001163530 | Prl           | 0 | 1 | -0.886145  | 0.0782188 | 0         | No change |
| NM_001163539 | 5430427O19Rik | 0 | 1 | 0.868742   | 0.272593  | 0.486718  | No change |
| NM_001163548 | Cyth3         | 0 | 1 | 0.0244878  | 10.5569   | 10.2205   | No change |
| NM_001163564 | Naf1          | 0 | 1 | -0.261654  | 2.21432   | 1.75276   | No change |
| NM_001163570 | Exosc8        | 0 | 1 | -0.252017  | 13.5363   | 10.8078   | No change |
| NM_001163571 | Senp3         | 0 | 1 | -0.0683485 | 18.4077   | 16.7083   | No change |
| NM_001163573 | Scnm1         | 0 | 1 | 0.0729245  | 14.618    | 14.6339   | No change |
| NM_001163575 | Parp10        | 0 | 1 | -0.0230808 | 5.35774   | 5.0173    | No change |
| NM_001163587 | Agxt2l1       | 0 | 1 | 0.698817   | 0.0262695 | 0.0541206 | No change |
| NM_001163588 | Prph          | 0 | 1 | 1.11385    | 0         | 0.0385558 | No change |
| NM_001163590 | Stx11         | 0 | 1 | -0.886145  | 0.339063  | 0.158759  | No change |
| NM_001163615 | Krtap20-2     | 0 | 1 | -0.886145  | 0.130511  | 0         | No change |
| NM_001163616 | 1810011H11Rik | 0 | 1 | 0.354863   | 0.473136  | 0.584855  | No change |
| NM_001163617 | Tars2         | 0 | 1 | -0.185959  | 12.5046   | 10.4584   | No change |
| NM_001163621 | Apol6         | 0 | 1 | 0.320306   | 0.410562  | 0.493409  | No change |
| NM_001163625 | Suit6b1       | 0 | 1 | -0.248715  | 0.87962   | 0.697     | No change |
| NM_001163626 | Noxa1         | 0 | 1 | 1.43578    | 0.127022  | 0.392539  | No change |
| NM_001163634 | Wnt7b         | 0 | 1 | 0.517752   | 1.27657   | 1.74649   | No change |
| NM_001163643 | Map3k12       | 0 | 1 | 0.111927   | 9.43023   | 9.70113   | No change |
| NM_001163645 | Osbpl3        | 0 | 1 | 0.0524543  | 0.483193  | 0.476559  | No change |
| NM_001163664 | Tnnt3         | 0 | 1 | -0.886145  | 0.0645305 | 0         | No change |
| NM_001163671 | Mapk9         | 0 | 1 | 0.0174012  | 12.4276   | 11.9728   | No change |
| NM_001163684 | Nosip         | 0 | 1 | -0.0458019 | 7.07422   | 6.52011   | No change |
| NM_001163685 | Psg18         | 0 | 1 | 0.113855   | 0         | 0         | No change |
| NM_001163686 | Dok5          | 0 | 1 | 0.751285   | 0.315353  | 0.527875  | No change |
| NM_001163687 | Naaa          | 0 | 1 | 0.211466   | 2.85343   | 3.14716   | No change |
| NM_001163695 | 4932438H23Rik | 0 | 1 | 0.175916   | 7.78181   | 8.36972   | No change |
| NM_001163709 | Bri3          | 0 | 1 | -0.0999756 | 16.045    | 14.2395   | No change |
| NM_001163713 | Tufm          | 0 | 1 | 0.13484    | 10.6677   | 11.1504   | No change |
| NM_001163718 | 0610007P22Rik | 0 | 1 | 0.258245   | 7.84938   | 8.94324   | No change |
| NM_001163730 | Gm9125        | 0 | 1 | 0.113855   | 0         | 0         | No change |
| NM_001163731 | Gm10697       | 0 | 1 | -0.886145  | 0.068126  | 0         | No change |
| NM_001163732 | Frmd3         | 0 | 1 | 0.113855   | 0         | 0         | No change |
| NM_001163734 | Rrp1b         | 0 | 1 | 0.324422   | 2.15609   | 2.57252   | No change |
| NM_001163741 | 1110021J02Rik | 0 | 1 | 0.182568   | 6.18585   | 6.68366   | No change |
| NM_001163748 | Pde9a         | 0 | 1 | -0.564217  | 0.236706  | 0.139332  | No change |
| NM_001163753 | Rab37         | 0 | 1 | -0.623111  | 0.243021  | 0.139076  | No change |
| NM_001163754 | Rab3gap2      | 0 | 1 | 0.192828   | 3.88956   | 4.23267   | No change |
| NM_001163755 | Skor1         | 0 | 1 | -3.20807   | 0.173461  | 0         | No change |
| NM_001163756 | Ces2e         | 0 | 1 | 0.515953   | 0.937573  | 1.28773   | No change |
| NM_001163759 | Dhx57         | 0 | 1 | 0.0430817  | 7.72841   | 7.57927   | No change |
| NM_001163762 | 6430548M08Rik | 0 | 1 | 0.413415   | 3.04561   | 3.87068   | No change |
| NM_001163763 | Tcf19         | 0 | 1 | 0.206964   | 1.72955   | 1.90309   | No change |
| NM_001163766 | Wdr90         | 0 | 1 | -0.16539   | 4.10026   | 3.47834   | No change |
| NM_001163769 | U2af1         | 0 | 1 | -0.0173897 | 6.99235   | 6.56963   | No change |
| NM_001163770 | Dom3z         | 0 | 1 | -0.258478  | 11.174    | 8.88085   | No change |
| NM_001163772 | Scpppg1       | 0 | 1 | -2.47111   | 0.66628   | 0         | No change |
| NM_001163776 | Tmprss3       | 0 | 1 | 0.113855   | 0         | 0         | No change |
| NM_001163791 | Orc6          | 0 | 1 | -0.208073  | 4.5273    | 3.72145   | No change |
| NM_001163847 | Tbc1d24       | 0 | 1 | 0.275136   | 1.66837   | 1.92297   | No change |
| NM_001164034 | Ntf3          | 0 | 1 | -0.471108  | 0.0976092 | 0.0502738 | No change |
| NM_001164058 | Prl7a1        | 0 | 1 | 0.113855   | 0         | 0         | No change |



|              |               |   |   |            |           |           |           |
|--------------|---------------|---|---|------------|-----------|-----------|-----------|
| NM_001164071 | Tank          | 0 | 1 | -0.222327  | 5.54411   | 4.51718   | No change |
| NM_001164074 | Tgif1         | 0 | 1 | 0.21239    | 24.241    | 26.7395   | No change |
| NM_001164096 | Poir3e        | 0 | 1 | 0.224354   | 6.72446   | 7.47967   | No change |
| NM_001164099 | Add3          | 0 | 1 | 0.0468823  | 14.9408   | 14.6917   | No change |
| NM_001164107 | Ripk3         | 0 | 1 | -0.613127  | 1.75446   | 1.07667   | No change |
| NM_001164109 | Nfatc1        | 0 | 1 | 0.138946   | 0.813593  | 0.853051  | No change |
| NM_001164159 | Ppp6r3        | 0 | 1 | 0.0970257  | 28.289    | 28.8025   | No change |
| NM_001164173 | Cpsf1         | 0 | 1 | -8.02E-05  | 14.4941   | 13.7955   | No change |
| NM_001164186 | Barhl1        | 0 | 1 | 0.113855   | 0.061657  | 0.0635131 | No change |
| NM_001164187 | Nagk          | 0 | 1 | -0.128603  | 9.49639   | 8.26058   | No change |
| NM_001164190 | Mtm1          | 0 | 1 | -0.0858175 | 2.91719   | 2.61395   | No change |
| NM_001164197 | Mmp19         | 0 | 1 | -0.383645  | 1.5109    | 1.09605   | No change |
| NM_001164202 | Gm8369        | 0 | 1 | -2.05607   | 0.405781  | 0.0522496 | No change |
| NM_001164210 | 1110032A04Rik | 0 | 1 | 0.698817   | 0.0390437 | 0.0804381 | No change |
| NM_001164222 | Col4a3bp      | 0 | 1 | -0.175652  | 8.54513   | 7.19947   | No change |
| NM_001164237 | Rnf41         | 0 | 1 | -0.103162  | 12.0693   | 10.694    | No change |
| NM_001164242 | Prpsap2       | 0 | 1 | 0.232966   | 9.56261   | 10.7018   | No change |
| NM_001164259 | Fgfr11        | 0 | 1 | -0.327983  | 4.73783   | 3.58503   | No change |
| NM_001164268 | Kalrn         | 0 | 1 | 0.158593   | 1.36568   | 1.45145   | No change |
| NM_001164284 | C87414        | 0 | 1 | 0.113855   | 0         | 0         | No change |
| NM_001164311 | Loxl4         | 0 | 1 | -0.656663  | 0.730641  | 0.435737  | No change |
| NM_001164312 | Gm4847        | 0 | 1 | 1.11385    | 0.0231384 | 0.071505  | No change |
| NM_001164327 | Gm4902        | 0 | 1 | 0.170438   | 1.4382    | 1.54323   | No change |
| NM_001164329 | Gm6904        | 0 | 1 | -0.0787903 | 0.543263  | 0.479672  | No change |
| NM_001164336 | March5        | 0 | 1 | -0.32543   | 8.42035   | 6.38263   | No change |
| NM_001164357 | Slc25a25      | 0 | 1 | -0.1807    | 10.709    | 8.99016   | No change |
| NM_001164370 | Mipol1        | 0 | 1 | -0.516196  | 3.06764   | 2.02437   | No change |
| NM_001164374 | LOC100302688  | 0 | 1 | 0.113855   | 0         | 0         | No change |
| NM_001164433 | Mical1        | 0 | 1 | 0.716519   | 0.541871  | 0.858744  | No change |
| NM_001164437 | Tmem212       | 0 | 1 | 0.651512   | 2.91602   | 4.40558   | No change |
| NM_001164441 | Ankrd33b      | 0 | 1 | -0.55357   | 0.241699  | 0.153215  | No change |
| NM_001164466 | Dpys          | 0 | 1 | -1.10854   | 0.198179  | 0.0680483 | No change |
| NM_001164480 | Sipa1         | 0 | 1 | -0.360076  | 0.944924  | 0.695264  | No change |
| NM_001164493 | Klhl29        | 0 | 1 | -0.423802  | 0.435272  | 0.30571   | No change |
| NM_001164504 | Rnf165        | 0 | 1 | 0.435783   | 0.0286409 | 0.0393375 | No change |
| NM_001164524 | Serpinb9c     | 0 | 1 | -2.47111   | 0.182061  | 0         | No change |
| NM_001164525 | Tstd1         | 0 | 1 | 0.741886   | 2.65617   | 4.29964   | No change |
| NM_001164526 | Mup11         | 0 | 1 | -1.47111   | 0.152668  | 0         | No change |
| NM_001164531 | Zfyve27       | 0 | 1 | 0.107703   | 5.97004   | 6.12354   | No change |
| NM_001164557 | Pdzk1ip1      | 0 | 1 | 0.210977   | 22.0993   | 24.3542   | No change |
| NM_001164562 | Sec22c        | 0 | 1 | 0.19711    | 1.23176   | 1.34497   | No change |
| NM_001164566 | Spats2l       | 0 | 1 | 0.679452   | 0.446869  | 0.690482  | No change |
| NM_001164572 | Snrk          | 0 | 1 | -0.0147873 | 6.11903   | 5.76424   | No change |
| NM_001164583 | Dnajc6        | 0 | 1 | -0.14918   | 0.388075  | 0.330834  | No change |
| NM_001164600 | Puf60         | 0 | 1 | -0.111381  | 54.6745   | 48.174    | No change |
| NM_001164607 | Maf1          | 0 | 1 | -0.0278063 | 11.0377   | 10.3028   | No change |
| NM_001164621 | Rnf14         | 0 | 1 | 0.11222    | 18.3326   | 18.8631   | No change |
| NM_001164624 | Zfp809        | 0 | 1 | 0.214315   | 8.99965   | 9.94236   | No change |
| NM_001164625 | 2210021J22Rik | 0 | 1 | 0.0165576  | 12.066    | 11.6142   | No change |
| NM_001164627 | Arhgap8       | 0 | 1 | 0.421036   | 2.64715   | 3.38504   | No change |
| NM_001164630 | Mum11         | 0 | 1 | 0.026526   | 20.3625   | 19.7425   | No change |
| NM_001164634 | Slc22a8       | 0 | 1 | -0.886145  | 0.020504  | 0         | No change |
| NM_001164636 | A730011L01Rik | 0 | 1 | 0.278914   | 3.58553   | 4.14287   | No change |
| NM_001164640 | Apol7a        | 0 | 1 | -2.20807   | 0.121628  | 0         | No change |
| NM_001164655 | 9530053A07Rik | 0 | 1 | 0.654423   | 0.0879739 | 0.135933  | No change |
| NM_001164684 | Tmem29        | 0 | 1 | 0.809      | 0.994193  | 1.6898    | No change |
| NM_001164696 | Klk6          | 0 | 1 | 0.113855   | 0         | 0         | No change |
| NM_001164708 | Hspb2         | 0 | 1 | 0.791927   | 0.499591  | 0.900604  | No change |
| NM_001164717 | Sh3pxd2a      | 0 | 1 | 0.218349   | 1.4234    | 1.57691   | No change |
| NM_001164725 | Fcrl6         | 0 | 1 | 0.113855   | 0         | 0         | No change |
| NM_001164735 | Crlf2         | 0 | 1 | -0.0201625 | 6.30311   | 5.9122    | No change |
| NM_001164743 | Slc17a3       | 0 | 1 | 0.113855   | 0         | 0         | No change |
| NM_001164767 | Robo3         | 0 | 1 | -1.88615   | 0.0442401 | 0         | No change |
| NM_001164787 | Sprr2a2       | 0 | 1 | 0.113855   | 0.0392968 | 0.0404798 | No change |
| NM_001164789 | Eomes         | 0 | 1 | -3.05607   | 0.152418  | 0         | No change |
| NM_001164790 | Scg3          | 0 | 1 | -0.886145  | 0.0953827 | 0.0327514 | No change |
| NM_001164792 | Tpbp          | 0 | 1 | 1.20132    | 0.139028  | 0.327346  | No change |
| NM_001164797 | Heph11        | 0 | 1 | -0.886145  | 0.0927296 | 0.0409376 | No change |
| NM_001164801 | Slc38a10      | 0 | 1 | 0.124641   | 18.9942   | 19.7131   | No change |
| NM_001164804 | Coro2a        | 0 | 1 | 0.0273612  | 28.329    | 27.4826   | No change |
| NM_001164806 | Bend4         | 0 | 1 | 0.052267   | 5.87581   | 5.79937   | No change |
| NM_001164813 | Pet117        | 0 | 1 | 1.33625    | 0.432875  | 1.33772   | No change |
| NM_001164818 | 0610011L14Rik | 0 | 1 | -0.182803  | 7.39638   | 6.19922   | No change |
| NM_001164823 | Tmem42        | 0 | 1 | 0.367611   | 3.73889   | 4.62174   | No change |
| NM_001164827 | Zfyve19       | 0 | 1 | -0.264657  | 6.45803   | 5.10813   | No change |
| NM_001164833 | P2rx2         | 0 | 1 | 0.0515126  | 29.7986   | 29.3957   | No change |

|              |               |   |   |            |           |           |           |
|--------------|---------------|---|---|------------|-----------|-----------|-----------|
| NM_001164885 | Lpin2         | 0 | 1 | 0.0948021  | 8.28095   | 8.41816   | No change |
| NM_001165939 | Tshb          | 0 | 1 | -2.47111   | 0.576928  | 0         | No change |
| NM_001165941 | Nsun6         | 0 | 1 | -0.107469  | 5.13189   | 4.53119   | No change |
| NM_001165944 | Olfr819       | 0 | 1 | 0.113855   | 0         | 0         | No change |
| NM_001165948 | Pogz          | 0 | 1 | 0.223586   | 3.00266   | 3.33824   | No change |
| NM_001165950 | Gm10267       | 0 | 1 | 1.11385    | 0         | 0.27826   | No change |
| NM_001165951 | Vangl1        | 0 | 1 | 0.392156   | 2.00788   | 2.51313   | No change |
| NM_001165957 | Txndc6        | 0 | 1 | 0.85082    | 0.175992  | 0.362581  | No change |
| NM_001165965 | Fndc7         | 0 | 1 | -0.287508  | 0.988654  | 0.767502  | No change |
| NM_001165968 | Pglyrp4       | 0 | 1 | 0.413415   | 0.375198  | 0.483116  | No change |
| NM_001165981 | Dcaf17        | 0 | 1 | -0.075623  | 2.29678   | 2.07018   | No change |
| NM_001165991 | Arfrp1        | 0 | 1 | 0.12491    | 6.95319   | 7.21781   | No change |
| NM_001165997 | Spopl         | 0 | 1 | 0.18334    | 7.38872   | 7.98794   | No change |
| NM_001165999 | Lingo2        | 0 | 1 | -0.886145  | 0.0150168 | 0         | No change |
| NM_001166009 | Tmem215       | 0 | 1 | 0.113855   | 0         | 0         | No change |
| NM_001166027 | Skint11       | 0 | 1 | -1.88615   | 0.150092  | 0         | No change |
| NM_001166028 | Sfnf14-ps     | 0 | 1 | -0.886145  | 0.0188156 | 0         | No change |
| NM_001166030 | Mylk4         | 0 | 1 | -0.471108  | 0.0617736 | 0.0381799 | No change |
| NM_001166062 | Gm16381       | 0 | 1 | -0.886145  | 0.14051   | 0         | No change |
| NM_001166067 | Slc4a5        | 0 | 1 | 0.647287   | 0.503247  | 0.756579  | No change |
| NM_001166157 | Krt81         | 0 | 1 | -0.886145  | 0.11259   | 0.0386597 | No change |
| NM_001166172 | Lce6a         | 0 | 1 | -3.20807   | 0.792966  | 0         | No change |
| NM_001166173 | Dmkn          | 0 | 1 | -0.886145  | 0.303013  | 0.138727  | No change |
| NM_001166177 | Arsg          | 0 | 1 | 0.141336   | 2.29312   | 2.40847   | No change |
| NM_001166206 | Erv3          | 0 | 1 | 0.599282   | 0.0825257 | 0.127515  | No change |
| NM_001166213 | Fam129c       | 0 | 1 | -1.47111   | 0.814301  | 0.260322  | No change |
| NM_001166273 | Cspg5         | 0 | 1 | -0.175652  | 0.180039  | 0.148367  | No change |
| NM_001166350 | Serpina11     | 0 | 1 | 0.113855   | 0         | 0         | No change |
| NM_001166361 | Fgf8          | 0 | 1 | 0.113855   | 0         | 0         | No change |
| NM_001166365 | Fam122b       | 0 | 1 | 0.60366    | 0.740216  | 1.07744   | No change |
| NM_001166370 | Trmt112       | 0 | 1 | 0.0526172  | 25.9323   | 25.5999   | No change |
| NM_001166372 | March1        | 0 | 1 | 0.0806879  | 0.709637  | 0.714     | No change |
| NM_001166376 | Ms4a6c        | 0 | 1 | 0.561314   | 1.00134   | 1.44407   | No change |
| NM_001166381 | Rad52         | 0 | 1 | 0.205777   | 3.07831   | 3.38238   | No change |
| NM_001166413 | Arhgef25      | 0 | 1 | -0.0550742 | 5.70474   | 5.22354   | No change |
| NM_001166437 | Tbc1d25       | 0 | 1 | -0.38091   | 3.51177   | 2.55871   | No change |
| NM_001166450 | Slc25a14      | 0 | 1 | 0.556373   | 1.74462   | 2.45924   | No change |
| NM_001166456 | Slc38a1       | 0 | 1 | 0.158709   | 0.928054  | 0.986503  | No change |
| NM_001166459 | Brcc3         | 0 | 1 | 0.454892   | 2.69463   | 3.53277   | No change |
| NM_001166482 | Mthfsd        | 0 | 1 | 0.113855   | 11.9563   | 12.3162   | No change |
| NM_001166547 | Eif4eni1f1    | 0 | 1 | -0.0279192 | 7.6721    | 7.16153   | No change |
| NM_001166556 | Abca6         | 0 | 1 | 0.654423   | 0.960966  | 1.46127   | No change |
| NM_001166580 | 8430408G22Rik | 0 | 1 | 1.29828    | 0.530388  | 1.31125   | No change |
| NM_001166625 | Ccr9          | 0 | 1 | 0.92121    | 0.17455   | 0.326917  | No change |
| NM_001166631 | Havcr1        | 0 | 1 | -0.886145  | 0.0351275 | 0         | No change |
| NM_001166633 | Gylt1b        | 0 | 1 | 0.304377   | 2.52445   | 2.97194   | No change |
| NM_001166634 | Gm4302        | 0 | 1 | 0.92121    | 0.225543  | 0.464666  | No change |
| NM_001166636 | Gm4312        | 0 | 1 | 1.28378    | 0.228751  | 0.628367  | No change |
| NM_001166637 | Gm4301        | 0 | 1 | 1.28378    | 0.228751  | 0.628367  | No change |
| NM_001166638 | Gm4303        | 0 | 1 | 0.92121    | 0.229757  | 0.473347  | No change |
| NM_001166639 | Gm4305        | 0 | 1 | 0.92121    | 0.229757  | 0.473347  | No change |
| NM_001166641 | Gm4307        | 0 | 1 | 0.92121    | 0.229757  | 0.473347  | No change |
| NM_001166644 | Zfp651        | 0 | 1 | 0.365918   | 1.19574   | 1.46904   | No change |
| NM_001166645 | Zfp882        | 0 | 1 | 0.161473   | 1.82526   | 1.94373   | No change |
| NM_001166648 | Zfp280c       | 0 | 1 | 0.0907712  | 4.34823   | 4.40775   | No change |
| NM_001166651 | Klhl33        | 0 | 1 | 1.69882    | 0         | 0.0896267 | No change |
| NM_001166658 | Cdr1          | 0 | 1 | -0.886145  | 0.030131  | 0         | No change |
| NM_001166661 | Ccdc85a       | 0 | 1 | 0.354863   | 0.131397  | 0.162423  | No change |
| NM_001166672 | Gm14548       | 0 | 1 | -1.20807   | 0.785273  | 0.303342  | No change |
| NM_001166706 | Vmn1r55       | 0 | 1 | 0.113855   | 0         | 0         | No change |
| NM_001166707 | Vmn1r123      | 0 | 1 | 0.113855   | 0         | 0         | No change |
| NM_001166708 | Vmn1r119      | 0 | 1 | 0.113855   | 0         | 0         | No change |
| NM_001166709 | Vmn1r207-ps   | 0 | 1 | 0.113855   | 0         | 0         | No change |
| NM_001166710 | Vmn1r7        | 0 | 1 | -0.886145  | 0.0744583 | 0         | No change |
| NM_001166711 | Gm5725        | 0 | 1 | 0.113855   | 0         | 0         | No change |
| NM_001166712 | Vmn1r151      | 0 | 1 | -0.886145  | 0.0759182 | 0         | No change |
| NM_001166713 | Gm5728        | 0 | 1 | -0.886145  | 0.0759182 | 0         | No change |
| NM_001166714 | Vmn1r122      | 0 | 1 | -0.886145  | 0.0759182 | 0         | No change |
| NM_001166715 | Vmn1r120      | 0 | 1 | -0.886145  | 0.0759182 | 0         | No change |
| NM_001166716 | Vmn1r113      | 0 | 1 | 0.113855   | 0         | 0         | No change |
| NM_001166718 | Vmn1r173      | 0 | 1 | -0.886145  | 0.073984  | 0         | No change |
| NM_001166719 | Vmn1r34       | 0 | 1 | -0.886145  | 0.0749386 | 0         | No change |
| NM_001166720 | Vmn1r39       | 0 | 1 | 0.113855   | 0         | 0         | No change |
| NM_001166721 | Vmn1r176      | 0 | 1 | 0.113855   | 0         | 0         | No change |
| NM_001166722 | Vmn1r170      | 0 | 1 | 0.113855   | 0         | 0         | No change |
| NM_001166723 | Vmn1r94       | 0 | 1 | -0.886145  | 0.0759182 | 0         | No change |

|              |          |   |   |           |           |           |           |
|--------------|----------|---|---|-----------|-----------|-----------|-----------|
| NM_001166724 | Vmn1r160 | 0 | 1 | 0.113855  | 0         | 0         | No change |
| NM_001166725 | Vmn1r129 | 0 | 1 | 0.113855  | 0         | 0         | No change |
| NM_001166726 | Vmn1r127 | 0 | 1 | -1.47111  | 0.151836  | 0         | No change |
| NM_001166727 | Vmn1r175 | 0 | 1 | 0.113855  | 0         | 0         | No change |
| NM_001166728 | Vmn1r1   | 0 | 1 | 0.113855  | 0         | 0         | No change |
| NM_001166731 | Vmn1r77  | 0 | 1 | 0.113855  | 0         | 0         | No change |
| NM_001166732 | Vmn1r60  | 0 | 1 | -0.886145 | 0.0771793 | 0         | No change |
| NM_001166733 | Vmn1r61  | 0 | 1 | 0.113855  | 0         | 0         | No change |
| NM_001166734 | Vmn1r57  | 0 | 1 | 0.113855  | 0         | 0         | No change |
| NM_001166735 | Vmn1r224 | 0 | 1 | -2.6935   | 0.466174  | 0         | No change |
| NM_001166736 | Vmn1r91  | 0 | 1 | 2.11385   | 0         | 0.233088  | No change |
| NM_001166737 | Vmn1r103 | 0 | 1 | -0.886145 | 0.0759182 | 0         | No change |
| NM_001166738 | Vmn1r104 | 0 | 1 | 0.113855  | 0         | 0         | No change |
| NM_001166739 | Vmn1r128 | 0 | 1 | 0.113855  | 0         | 0         | No change |
| NM_001166740 | Vmn1r125 | 0 | 1 | -0.886145 | 0.0754253 | 0         | No change |
| NM_001166741 | Vmn1r121 | 0 | 1 | 0.113855  | 0         | 0         | No change |
| NM_001166742 | Vmn1r118 | 0 | 1 | 0.113855  | 0         | 0         | No change |
| NM_001166743 | Vmn1r117 | 0 | 1 | -0.886145 | 0.0754253 | 0         | No change |
| NM_001166744 | Vmn1r116 | 0 | 1 | -0.886145 | 0.0754253 | 0         | No change |
| NM_001166745 | Vmn1r115 | 0 | 1 | -1.47111  | 0.156966  | 0         | No change |
| NM_001166746 | Vmn1r111 | 0 | 1 | 0.113855  | 0         | 0         | No change |
| NM_001166747 | Vmn1r135 | 0 | 1 | 0.113855  | 0         | 0         | No change |
| NM_001166748 | Vmn1r139 | 0 | 1 | 0.113855  | 0         | 0         | No change |
| NM_001166749 | Vmn1r142 | 0 | 1 | -0.886145 | 0.0759182 | 0         | No change |
| NM_001166750 | Vmn1r143 | 0 | 1 | -0.886145 | 0.0754253 | 0         | No change |
| NM_001166751 | Gm8660   | 0 | 1 | -0.886145 | 0.0759182 | 0         | No change |
| NM_001166752 | Vmn1r152 | 0 | 1 | 0.113855  | 0         | 0         | No change |
| NM_001166753 | Vmn1r155 | 0 | 1 | -0.886145 | 0.0754253 | 0         | No change |
| NM_001166754 | Vmn1r157 | 0 | 1 | 0.113855  | 0         | 0         | No change |
| NM_001166755 | Vmn1r163 | 0 | 1 | 0.113855  | 0         | 0         | No change |
| NM_001166756 | Gm8720   | 0 | 1 | 0.113855  | 0         | 0         | No change |
| NM_001166757 | Vmn1r124 | 0 | 1 | 1.11385   | 0         | 0.0776959 | No change |
| NM_001166758 | Vmn1r159 | 0 | 1 | -0.886145 | 0.0759182 | 0         | No change |
| NM_001166759 | Vmn1r107 | 0 | 1 | -0.886145 | 0.0754253 | 0         | No change |
| NM_001166835 | Vmn1r79  | 0 | 1 | -0.886145 | 0.0756709 | 0         | No change |
| NM_001166836 | Vmn1r101 | 0 | 1 | 0.113855  | 0         | 0         | No change |
| NM_001166837 | Vmn1r114 | 0 | 1 | -0.886145 | 0.0721459 | 0         | No change |
| NM_001166838 | Vmn1r126 | 0 | 1 | 0.113855  | 0         | 0         | No change |
| NM_001166839 | Gm4172   | 0 | 1 | 0.113855  | 0         | 0         | No change |
| NM_001166840 | Vmn1r149 | 0 | 1 | 0.113855  | 0         | 0         | No change |
| NM_001166841 | Vmn1r158 | 0 | 1 | 0.113855  | 0         | 0         | No change |
| NM_001166842 | Vmn1r168 | 0 | 1 | 0.113855  | 0         | 0         | No change |
| NM_001166843 | Vmn1r169 | 0 | 1 | 0.113855  | 0         | 0         | No change |
| NM_001166844 | Vmn1r100 | 0 | 1 | 0.113855  | 0         | 0         | No change |
| NM_001166845 | Vmn1r109 | 0 | 1 | 0.113855  | 0         | 0         | No change |
| NM_001166846 | Vmn1r110 | 0 | 1 | -0.886145 | 0.0754253 | 0         | No change |
| NM_001166847 | Vmn1r112 | 0 | 1 | 0.113855  | 0         | 0         | No change |
| NM_001166848 | Vmn1r130 | 0 | 1 | -0.886145 | 0.0754253 | 0         | No change |
| NM_001166849 | Vmn1r137 | 0 | 1 | -0.886145 | 0.0754253 | 0         | No change |
| NM_001166850 | Vmn1r165 | 0 | 1 | -0.886145 | 0.0754253 | 0         | No change |
| NM_001167146 | Gm5726   | 0 | 1 | 0.113855  | 0         | 0         | No change |
| NM_001167147 | Gm8677   | 0 | 1 | 0.113855  | 0         | 0         | No change |
| NM_001167148 | Gm16442  | 0 | 1 | 0.113855  | 0         | 0         | No change |
| NM_001167149 | Gm16451  | 0 | 1 | 0.113855  | 0         | 0         | No change |
| NM_001167150 | Gm8453   | 0 | 1 | 0.113855  | 0         | 0         | No change |
| NM_001167151 | Gm4498   | 0 | 1 | 0.113855  | 0         | 0         | No change |
| NM_001167153 | Gm6164   | 0 | 1 | -0.886145 | 0.0754253 | 0         | No change |
| NM_001167154 | Gm8693   | 0 | 1 | 0.113855  | 0         | 0         | No change |
| NM_001167155 | Gm4144   | 0 | 1 | 0.113855  | 0         | 0         | No change |
| NM_001167158 | Gm4133   | 0 | 1 | 0.113855  | 0         | 0         | No change |
| NM_001167159 | Gm4187   | 0 | 1 | 0.113855  | 0         | 0         | No change |
| NM_001167160 | Gm10665  | 0 | 1 | 0.113855  | 0         | 0         | No change |
| NM_001167161 | Gm10670  | 0 | 1 | 0.113855  | 0         | 0         | No change |
| NM_001167162 | Gm4201   | 0 | 1 | 0.113855  | 0         | 0         | No change |
| NM_001167163 | Gm4141   | 0 | 1 | 0.113855  | 0         | 0         | No change |
| NM_001167164 | Gm4214   | 0 | 1 | 0.113855  | 0         | 0         | No change |
| NM_001167165 | Gm4175   | 0 | 1 | 0.113855  | 0         | 0         | No change |
| NM_001167166 | Gm4216   | 0 | 1 | -0.886145 | 0.0759182 | 0         | No change |
| NM_001167167 | Gm4177   | 0 | 1 | -0.886145 | 0.0759182 | 0         | No change |
| NM_001167168 | Gm4220   | 0 | 1 | 0.113855  | 0         | 0         | No change |
| NM_001167169 | Gm4179   | 0 | 1 | 0.113855  | 0         | 0         | No change |
| NM_001167534 | Vmn1r2   | 0 | 1 | -0.886145 | 0.0756709 | 0         | No change |
| NM_001167535 | Vmn1r3   | 0 | 1 | -1.47111  | 0.151342  | 0         | No change |
| NM_001167536 | Vmn1r86  | 0 | 1 | 0.113855  | 0         | 0         | No change |
| NM_001167537 | Vmn1r88  | 0 | 1 | 0.113855  | 0         | 0         | No change |
| NM_001167538 | Vmn1r95  | 0 | 1 | -0.886145 | 0.0754253 | 0         | No change |

|              |               |   |   |            |           |           |           |
|--------------|---------------|---|---|------------|-----------|-----------|-----------|
| NM_001167539 | Vmn1r238      | 0 | 1 | -0.886145  | 0.0756709 | 0         | No change |
| NM_001167540 | Vmn1r184      | 0 | 1 | 0.113855   | 0         | 0         | No change |
| NM_001167541 | Vmn1r196      | 0 | 1 | 1.11385    | 0         | 0.0792395 | No change |
| NM_001167542 | Vmn1r221      | 0 | 1 | -1.88615   | 0.222661  | 0         | No change |
| NM_001167567 | Vmn1r186      | 0 | 1 | -0.886145  | 0.0771793 | 0         | No change |
| NM_001167568 | Vmn1r187      | 0 | 1 | 0.113855   | 0         | 0         | No change |
| NM_001167573 | Gm10666       | 0 | 1 | -0.886145  | 0.0721459 | 0         | No change |
| NM_001167584 | Pate-g        | 0 | 1 | 0.113855   | 0         | 0         | No change |
| NM_001167586 | Gm7257        | 0 | 1 | 1.11385    | 0         | 0.138326  | No change |
| NM_001167603 | Gm6762        | 0 | 1 | 0.113855   | 0.542357  | 0.558685  | No change |
| NM_001167691 | Sirt4         | 0 | 1 | 0.037906   | 6.56681   | 6.41536   | No change |
| NM_001167743 | Sifn8         | 0 | 1 | 0.162764   | 1.28852   | 1.37388   | No change |
| NM_001167745 | Wasl          | 0 | 1 | 0.556373   | 2.03093   | 2.86283   | No change |
| NM_001167748 | Egfem1        | 0 | 1 | -0.734142  | 0.221335  | 0.113999  | No change |
| NM_001167751 | Ccdc132       | 0 | 1 | 0.082146   | 3.44884   | 3.47501   | No change |
| NM_001167777 | Asxl3         | 0 | 1 | -1.40971   | 0.13108   | 0.0429629 | No change |
| NM_001167790 | Defa17        | 0 | 1 | -0.208073  | 0.678277  | 0.524022  | No change |
| NM_001167828 | Trim30d       | 0 | 1 | 0.221658   | 2.44276   | 2.71322   | No change |
| NM_001167875 | Cyp2c50       | 0 | 1 | 0.113855   | 0         | 0         | No change |
| NM_001167876 | Skint5        | 0 | 1 | 0.113855   | 0         | 0         | No change |
| NM_001167879 | Fam59b        | 0 | 1 | -1.62311   | 0.163684  | 0.0374692 | No change |
| NM_001167891 | Nrg2          | 0 | 1 | 0.113855   | 0.49253   | 0.507357  | No change |
| NM_001167920 | Slc8a3        | 0 | 1 | 0.528892   | 0.0281986 | 0.0435713 | No change |
| NM_001167923 | Col6a5        | 0 | 1 | -0.14239   | 3.17059   | 2.73328   | No change |
| NM_001167936 | Zyg11a        | 0 | 1 | 0.0445921  | 1.91815   | 1.88181   | No change |
| NM_001167939 | Mau2          | 0 | 1 | -0.0266491 | 18.745    | 17.5162   | No change |
| NM_001167967 | Ankrd10       | 0 | 1 | 0.181362   | 8.97091   | 9.68498   | No change |
| NM_001167983 | Sipa1l1       | 0 | 1 | 0.00870473 | 6.81631   | 6.5273    | No change |
| NM_001168223 | Clec2g        | 0 | 1 | 1.69882    | 0         | 0.0626448 | No change |
| NM_001168276 | Zfp647        | 0 | 1 | 0.528892   | 0.424587  | 0.593572  | No change |
| NM_001168281 | Wwtr1         | 0 | 1 | 0.00740387 | 7.11701   | 6.80869   | No change |
| NM_001168289 | Pdss2         | 0 | 1 | -0.282074  | 2.16      | 1.68012   | No change |
| NM_001168346 | Nfatc4        | 0 | 1 | 0.622868   | 0.433522  | 0.643064  | No change |
| NM_001168354 | Kcnj1         | 0 | 1 | -1.88615   | 0.0680595 | 0         | No change |
| NM_001168356 | Bnpl          | 0 | 1 | 0.595388   | 2.3231    | 3.35945   | No change |
| NM_001168358 | Tyw3          | 0 | 1 | 0.113855   | 1.14251   | 1.1769    | No change |
| NM_001168470 | Tmem93        | 0 | 1 | 0.11864    | 14.9129   | 15.413    | No change |
| NM_001168488 | Men1          | 0 | 1 | 0.0997796  | 5.35898   | 5.46645   | No change |
| NM_001168491 | Pdcd4         | 0 | 1 | 0.00160036 | 21.1472   | 20.1508   | No change |
| NM_001168503 | Olf78         | 0 | 1 | 0.113855   | 0.106118  | 0.109312  | No change |
| NM_001168509 | Ffar2         | 0 | 1 | 0.274319   | 1.16804   | 1.34904   | No change |
| NM_001168521 | Sarm1         | 0 | 1 | -1.37157   | 0.36439   | 0.12512   | No change |
| NM_001168536 | Cdadcl        | 0 | 1 | 0.284619   | 6.94371   | 8.05625   | No change |
| NM_001168561 | Zfp446        | 0 | 1 | -0.301183  | 2.09172   | 1.61202   | No change |
| NM_001168564 | Kcns3         | 0 | 1 | 0.0129259  | 1.77268   | 1.70097   | No change |
| NM_001168590 | 2010106E10Rik | 0 | 1 | 0.113855   | 0         | 0         | No change |
| NM_001168615 | Tifab         | 0 | 1 | -0.422198  | 0.557862  | 0.389945  | No change |
| NM_001168624 | C2cd4c        | 0 | 1 | -2.47111   | 0.0526302 | 0         | No change |
| NM_001168660 | Apo19b        | 0 | 1 | 0.910321   | 0.811431  | 1.48597   | No change |
| NM_001168684 | Tmcc3         | 0 | 1 | 0.218882   | 5.57441   | 6.17684   | No change |
| NM_001168693 | Endou         | 0 | 1 | 1.17275    | 0.318762  | 0.716417  | No change |
| NM_001169114 | B3gnt2        | 0 | 1 | 0.193708   | 3.30067   | 3.59512   | No change |
| NM_001169153 | Cd300lf       | 0 | 1 | -0.208073  | 0.14789   | 0.114256  | No change |
| NM_001170332 | Clec4a2       | 0 | 1 | -0.471108  | 0.580533  | 0.388706  | No change |
| NM_001170395 | Cd163         | 0 | 1 | 0.0289659  | 0.527507  | 0.511423  | No change |
| NM_001170479 | Loh12cr1      | 0 | 1 | 0.457339   | 3.96032   | 5.18811   | No change |
| NM_001170489 | Aplf          | 0 | 1 | 0.135071   | 2.93306   | 3.06645   | No change |
| NM_001170537 | Mef2c         | 0 | 1 | 0.297301   | 1.26872   | 1.48564   | No change |
| NM_001170552 | Krit1         | 0 | 1 | -0.199434  | 3.83461   | 3.1767    | No change |
| NM_001170591 | Nfu1          | 0 | 1 | -0.198089  | 5.18136   | 4.28491   | No change |
| NM_001170632 | Fcamr         | 0 | 1 | 1.11385    | 0.0729387 | 0.187836  | No change |
| NM_001170638 | Slc17a1       | 0 | 1 | 0.113855   | 0         | 0         | No change |
| NM_001170669 | Pde8b         | 0 | 1 | 0.176251   | 2.7159    | 2.922     | No change |
| NM_001170694 | Rcbtb2        | 0 | 1 | 0.0410219  | 6.65307   | 6.51491   | No change |
| NM_001170705 | Dthd1         | 0 | 1 | 1.11385    | 0         | 0.0294587 | No change |
| NM_001170742 | Wdr59         | 0 | 1 | 0.163854   | 5.39981   | 5.75901   | No change |
| NM_001170744 | Ctbp2         | 0 | 1 | 0.0805444  | 11.6991   | 11.7758   | No change |
| NM_001170745 | Magi2         | 0 | 1 | -0.0877791 | 1.46216   | 1.30829   | No change |
| NM_001170847 | Rbm20         | 0 | 1 | 0.0410985  | 0.634341  | 0.620765  | No change |
| NM_001170848 | Luc712        | 0 | 1 | 0.0188282  | 19.4612   | 18.7675   | No change |
| NM_001170851 | Klra2         | 0 | 1 | -0.134073  | 0.66515   | 0.570978  | No change |
| NM_001170853 | Mndal         | 0 | 1 | -0.0445746 | 4.52931   | 4.17652   | No change |
| NM_001170858 | BC068281      | 0 | 1 | 0.419958   | 1.70909   | 2.18438   | No change |
| NM_001170869 | Wibg          | 0 | 1 | 0.34832    | 8.60013   | 10.434    | No change |
| NM_001170935 | BC005764      | 0 | 1 | 0.31953    | 2.74136   | 3.2601    | No change |
| NM_001170955 | Gm15299       | 0 | 1 | 0.113855   | 0         | 0         | No change |

|              |               |   |   |            |           |           |           |
|--------------|---------------|---|---|------------|-----------|-----------|-----------|
| NM_001170959 | Pde6c         | 0 | 1 | 1.69882    | 0         | 0.0497167 | No change |
| NM_001170985 | Kirrel        | 0 | 1 | 0.0123168  | 0.975529  | 0.935933  | No change |
| NM_001171003 | Mgam          | 0 | 1 | -0.985681  | 0.150386  | 0.0663912 | No change |
| NM_001171010 | Slc14a1       | 0 | 1 | -0.127153  | 0.216102  | 0.185506  | No change |
| NM_001172055 | Bdh2          | 0 | 1 | -0.0560702 | 0.476126  | 0.429152  | No change |
| NM_001172072 | Vmn1r68       | 0 | 1 | 0.113855   | 0         | 0         | No change |
| NM_001172074 | 3110009E18Rik | 0 | 1 | -0.65168   | 1.10734   | 0.641627  | No change |
| NM_001172092 | Depdc1a       | 0 | 1 | -1.34558   | 0.209729  | 0.0648128 | No change |
| NM_001172117 | Hck           | 0 | 1 | 0.45089    | 0.599652  | 0.789289  | No change |
| NM_001172146 | Aimp2         | 0 | 1 | 0.152329   | 10.8215   | 11.4502   | No change |
| NM_001172148 | Rbm41         | 0 | 1 | 0.664052   | 0.844194  | 1.28831   | No change |
| NM_001172160 | Flrt3         | 0 | 1 | 0.0712943  | 2.62673   | 2.62669   | No change |
| NM_001172205 | Arid5a        | 0 | 1 | 0.0726321  | 0.856028  | 0.856604  | No change |
| NM_001172207 | Lrtm2         | 0 | 1 | -1.88615   | 0.0613674 | 0         | No change |
| NM_001172216 | D330028D13Rik | 0 | 1 | -0.198089  | 2.45934   | 2.03384   | No change |
| NM_001172472 | Sphk1         | 0 | 1 | 0.113855   | 2.26131   | 2.32939   | No change |
| NM_001172561 | Sphk2         | 0 | 1 | 0.213836   | 8.62903   | 9.52813   | No change |
| NM_001172588 | Mrgpra2a      | 0 | 1 | -2.05607   | 0.449995  | 0.0579427 | No change |
| NM_001172686 | Olfir376      | 0 | 1 | 0.113855   | 0         | 0         | No change |
| NM_001173372 | Fxyd4         | 0 | 1 | 0.376889   | 0.505938  | 0.651461  | No change |
| NM_001173483 | Rlbp1         | 0 | 1 | -2.20807   | 0.131434  | 0         | No change |
| NM_001173500 | G630090E17Rik | 0 | 1 | 0.113855   | 0.430203  | 0.443154  | No change |
| NM_001173505 | Thpo          | 0 | 1 | 0.113855   | 0.154052  | 0.158689  | No change |
| NM_001173550 | C5ar1         | 0 | 1 | 0.113855   | 0.356696  | 0.367434  | No change |
| NM_001174047 | Cacna2d2      | 0 | 1 | -1.07879   | 0.188733  | 0.077766  | No change |
| NM_001174086 | Shisa9        | 0 | 1 | -0.0532552 | 0.915483  | 0.915483  | No change |
| NM_001174099 | Krt36         | 0 | 1 | 0.113855   | 0.0418576 | 0.0431177 | No change |
| NM_001174107 | Map3k9        | 0 | 1 | 0.1028     | 0.853195  | 0.872119  | No change |
| NM_001174170 | Serpib2       | 0 | 1 | -2.47111   | 0.176706  | 0         | No change |
| NM_001176528 | Rara          | 0 | 1 | -0.0761161 | 3.35421   | 3.02611   | No change |
| NM_001177319 | Tfpi          | 0 | 1 | 0.3065     | 1.91097   | 2.2531    | No change |
| NM_001177348 | Gm3646        | 0 | 1 | 0.113855   | 0         | 0         | No change |
| NM_001177349 | Pydc4         | 0 | 1 | 0.64437    | 0.208039  | 0.321452  | No change |
| NM_001177351 | AW112010      | 0 | 1 | -0.0925961 | 6.65455   | 5.92854   | No change |
| NM_001177352 | Myc           | 0 | 1 | 0.735343   | 0.34861   | 0.568582  | No change |
| NM_001177356 | Gm3852        | 0 | 1 | -1.47111   | 0.194402  | 0         | No change |
| NM_001177366 | Fut7          | 0 | 1 | -0.301183  | 0.118593  | 0.0814418 | No change |
| NM_001177373 | Klk11         | 0 | 1 | -1.47111   | 0.107385  | 0         | No change |
| NM_001177390 | Gm6985        | 0 | 1 | 0.113855   | 0         | 0         | No change |
| NM_001177394 | Gm13476       | 0 | 1 | -0.0466099 | 0.963497  | 0.882224  | No change |
| NM_001177401 | Spint3        | 0 | 1 | 0.316672   | 19.8763   | 23.5848   | No change |
| NM_001177412 | Usp35         | 0 | 1 | 0.336247   | 0.927606  | 1.11779   | No change |
| NM_001177418 | Gm13698       | 0 | 1 | 0.310892   | 4.29527   | 5.07525   | No change |
| NM_001177419 | Fbxw28        | 0 | 1 | 0.113855   | 0         | 0         | No change |
| NM_001177422 | Gm13693       | 0 | 1 | 0.310892   | 4.29527   | 5.07525   | No change |
| NM_001177424 | Gm13696       | 0 | 1 | 0.310892   | 4.29527   | 5.07525   | No change |
| NM_001177427 | Eid2b         | 0 | 1 | -0.0586124 | 2.01258   | 1.83624   | No change |
| NM_001177429 | Gm13694       | 0 | 1 | 0.310892   | 4.29527   | 5.07525   | No change |
| NM_001177430 | Gm13697       | 0 | 1 | 0.310892   | 4.29527   | 5.07525   | No change |
| NM_001177432 | Gm13691       | 0 | 1 | 0.310892   | 4.29527   | 5.07525   | No change |
| NM_001177434 | Gm13695       | 0 | 1 | 0.310892   | 4.29527   | 5.07525   | No change |
| NM_001177439 | Gm1332        | 0 | 1 | 0.113855   | 0         | 0         | No change |
| NM_001177464 | Zfp516        | 0 | 1 | 0.00389973 | 7.26515   | 6.93398   | No change |
| NM_001177468 | Gm7325        | 0 | 1 | -1.47111   | 0.172507  | 0         | No change |
| NM_001177481 | Gm10104       | 0 | 1 | 0.113855   | 0         | 0         | No change |
| NM_001177482 | Gm14851       | 0 | 1 | -0.886145  | 0.153509  | 0         | No change |
| NM_001177484 | Gm11559       | 0 | 1 | 0.113855   | 0         | 0         | No change |
| NM_001177485 | Gm15284       | 0 | 1 | -0.886145  | 0.1787    | 0         | No change |
| NM_001177486 | Gm15293       | 0 | 1 | 0.113855   | 0         | 0         | No change |
| NM_001177487 | Gm15292       | 0 | 1 | 0.113855   | 0         | 0         | No change |
| NM_001177505 | Zfp167        | 0 | 1 | 0.0119752  | 12.3558   | 11.8578   | No change |
| NM_001177508 | Olfir743      | 0 | 1 | 0.113855   | 0         | 0         | No change |
| NM_001177511 | Npffr1        | 0 | 1 | -0.471108  | 0.106646  | 0.0549281 | No change |
| NM_001177518 | Gm7849        | 0 | 1 | 0.113855   | 0         | 0         | No change |
| NM_001177521 | Gm15308       | 0 | 1 | 0.113855   | 0         | 0         | No change |
| NM_001177522 | Gm14850       | 0 | 1 | 0.113855   | 0         | 0         | No change |
| NM_001177523 | Gm6696        | 0 | 1 | -0.886145  | 0.244537  | 0         | No change |
| NM_001177525 | EU599041      | 0 | 1 | -1.88615   | 0.53685   | 0.100548  | No change |
| NM_001177526 | Gm7861        | 0 | 1 | 0.113855   | 0         | 0         | No change |
| NM_001177528 | Gm15315       | 0 | 1 | 0.113855   | 0         | 0         | No change |
| NM_001177529 | Gm5494        | 0 | 1 | -0.886145  | 0.105595  | 0         | No change |
| NM_001177533 | Apol11a       | 0 | 1 | -2.20807   | 0.246265  | 0         | No change |
| NM_001177535 | Gm4340        | 0 | 1 | 1.11385    | 0         | 0.0570675 | No change |
| NM_001177536 | Prdm11        | 0 | 1 | -0.788848  | 1.5653    | 0.8446    | No change |
| NM_001177537 | Gm11562       | 0 | 1 | -1.47111   | 0.28102   | 0         | No change |
| NM_001177538 | Gm10394       | 0 | 1 | 0.85082    | 0.0597197 | 0.123035  | No change |

|              |               |   |   |             |           |           |           |
|--------------|---------------|---|---|-------------|-----------|-----------|-----------|
| NM_001177539 | Gm10391       | 0 | 1 | 0.85082     | 0.0597197 | 0.123035  | No change |
| NM_001177542 | C87977        | 0 | 1 | 0.113855    | 0         | 0         | No change |
| NM_001177550 | Zfp442        | 0 | 1 | 0.387778    | 2.7464    | 3.42603   | No change |
| NM_001177551 | Trim61        | 0 | 1 | 0.113855    | 0         | 0         | No change |
| NM_001177561 | Slc10a1       | 0 | 1 | 0.290733    | 0.915917  | 1.07215   | No change |
| NM_001177565 | Gm8300        | 0 | 1 | 0.94393     | 0.297833  | 0.575248  | No change |
| NM_001177566 | Mrgpra9       | 0 | 1 | 0.528892    | 0.132875  | 0.205313  | No change |
| NM_001177569 | Gm6026        | 0 | 1 | -2.20807    | 0.829678  | 0         | No change |
| NM_001177570 | Zfp616        | 0 | 1 | 0.113855    | 0         | 0         | No change |
| NM_001177571 | Ccdc162       | 0 | 1 | 0.413415    | 0.633803  | 0.809574  | No change |
| NM_001177574 | Gm2022        | 0 | 1 | -2.05607    | 0.306006  | 0.0394023 | No change |
| NM_001177577 | Gm1045        | 0 | 1 | -1.47111    | 0.183644  | 0         | No change |
| NM_001177578 | Gm13871       | 0 | 1 | -0.886145   | 0.0525984 | 0         | No change |
| NM_001177581 | 7420461P10Rik | 0 | 1 | -2.47111    | 0.470263  | 0         | No change |
| NM_001177582 | Esp23         | 0 | 1 | -1.88615    | 0.323651  | 0         | No change |
| NM_001177583 | Esp4          | 0 | 1 | 0.113855    | 0         | 0         | No change |
| NM_001177584 | Esp8          | 0 | 1 | 0.113855    | 0         | 0         | No change |
| NM_001177585 | Esp34         | 0 | 1 | 0.113855    | 0         | 0         | No change |
| NM_001177586 | Esp31         | 0 | 1 | 0.113855    | 0         | 0         | No change |
| NM_001177587 | Esp36         | 0 | 1 | 0.113855    | 0         | 0         | No change |
| NM_001177588 | Gm8882        | 0 | 1 | 0.113855    | 0         | 0         | No change |
| NM_001177589 | Gm3985        | 0 | 1 | 0.113855    | 0         | 0         | No change |
| NM_001177594 | Slc24a6       | 0 | 1 | 0.466157    | 1.13563   | 1.50041   | No change |
| NM_001177600 | Adam23        | 0 | 1 | 0.476425    | 0.145295  | 0.199558  | No change |
| NM_001177609 | Ube2i         | 0 | 1 | 0.102211    | 26.8448   | 27.4305   | No change |
| NM_001177615 | Arpp21        | 0 | 1 | -0.886145   | 0.020384  | 0         | No change |
| NM_001177621 | Slc5a6        | 0 | 1 | 0.372388    | 2.15001   | 2.65351   | No change |
| NM_001177627 | Slc2a6        | 0 | 1 | 0.801911    | 0.600801  | 1.01934   | No change |
| NM_001177652 | Gm5886        | 0 | 1 | 0.113855    | 0         | 0         | No change |
| NM_001177656 | Grin1         | 0 | 1 | -1.62311    | 0.161617  | 0.0369961 | No change |
| NM_001177658 | Mrpl15        | 0 | 1 | -0.168545   | 5.95283   | 5.03886   | No change |
| NM_001177673 | Gpr68         | 0 | 1 | -0.581291   | 0.787626  | 0.491719  | No change |
| NM_001177750 | Gm10767       | 0 | 1 | 0.22077     | 3.79683   | 4.21533   | No change |
| NM_001177775 | H60b          | 0 | 1 | -0.471108   | 0.806122  | 0.52843   | No change |
| NM_001177783 | Rfpl4b        | 0 | 1 | 0.113855    | 0         | 0         | No change |
| NM_001177795 | Rgs20         | 0 | 1 | -0.471108   | 0.0655934 | 0.033784  | No change |
| NM_001177810 | Rapgef3       | 0 | 1 | -0.0116761  | 3.26145   | 3.0781    | No change |
| NM_001177838 | Smox          | 0 | 1 | 0.262998    | 5.57098   | 6.36994   | No change |
| NM_001177843 | Frm4a         | 0 | 1 | 0.367956    | 1.38149   | 1.69919   | No change |
| NM_001177857 | Olf1053       | 0 | 1 | 0.113855    | 0         | 0         | No change |
| NM_001177874 | Gps1          | 0 | 1 | -0.086643   | 40.3919   | 36.2043   | No change |
| NM_001177878 | Phka2         | 0 | 1 | 0.137314    | 1.9426    | 2.03416   | No change |
| NM_001177883 | Elavl2        | 0 | 1 | -0.409707   | 0.759366  | 0.538867  | No change |
| NM_001177896 | 9830107B12Rik | 0 | 1 | 0.113855    | 0         | 0         | No change |
| NM_001177901 | Zfp513        | 0 | 1 | -0.206324   | 6.45014   | 5.31545   | No change |
| NM_001177937 | Eda           | 0 | 1 | 0.300268    | 0.394302  | 0.464197  | No change |
| NM_001177955 | Gpm6b         | 0 | 1 | 0.0138076   | 8.27179   | 7.94851   | No change |
| NM_001177977 | Acsm2         | 0 | 1 | 0.113855    | 0         | 0         | No change |
| NM_001178038 | Fmo6          | 0 | 1 | 0.113855    | 0         | 0         | No change |
| NM_001184964 | Rhox3b        | 0 | 1 | -2.20807    | 0.430203  | 0         | No change |
| NM_001184969 | Rhox3e        | 0 | 1 | -2.20807    | 0.430203  | 0         | No change |
| NM_001184980 | Sult2a5       | 0 | 1 | 1.69882     | 0.066628  | 0.343169  | No change |
| NM_001184981 | Sult2a7       | 0 | 1 | -1.88615    | 0.233087  | 0         | No change |
| NM_001185040 | Gm5885        | 0 | 1 | 0.113855    | 0         | 0         | No change |
| NM_001185083 | Ins2          | 0 | 1 | -1.47111    | 0.30906   | 0         | No change |
| NM_001185164 | Vegfb         | 0 | 1 | 0.476425    | 2.41948   | 3.22178   | No change |
| NM_001185173 | Zscan4b       | 0 | 1 | -1.88615    | 0.119201  | 0         | No change |
| NM_001185182 | H2-Ke2        | 0 | 1 | -0.16413    | 39.2446   | 33.3166   | No change |
| NM_001190161 | Psyc1         | 0 | 1 | 0.113855    | 0.320059  | 0.329694  | No change |
| NM_001190187 | Nrg3          | 0 | 1 | -3.05607    | 0.139073  | 0         | No change |
| NM_001190310 | Clec4b1       | 0 | 1 | 0.113855    | 0.266682  | 0.27471   | No change |
| NM_001190320 | Clec4n        | 0 | 1 | -0.0116761  | 0.663742  | 0.621567  | No change |
| NM_001190325 | Igll1         | 0 | 1 | 0.698817    | 0.0801068 | 0.165037  | No change |
| NM_001190330 | Ces2a         | 0 | 1 | -0.208073   | 0.149475  | 0.115481  | No change |
| NM_001190356 | Gm4832        | 0 | 1 | 0.113855    | 0         | 0         | No change |
| NM_001190374 | Adamts13      | 0 | 1 | 0.319324    | 0.927964  | 1.10372   | No change |
| NM_001190376 | Camta2        | 0 | 1 | 0.335027    | 2.52772   | 3.03779   | No change |
| NM_001190381 | Olf1596       | 0 | 1 | 0.113855    | 0         | 0         | No change |
| NM_001190385 | Caly          | 0 | 1 | -2.05607    | 0.442495  | 0.056977  | No change |
| NM_001190401 | Usp34         | 0 | 1 | -0.036739   | 16.9892   | 15.7653   | No change |
| NM_001190437 | Abhd11        | 0 | 1 | 0.041705    | 16.8059   | 16.4639   | No change |
| NM_001190473 | Dapk3         | 0 | 1 | 0.156083    | 4.15829   | 4.41198   | No change |
| NM_001190490 | Dmpk          | 0 | 1 | -0.00588443 | 2.91037   | 2.75707   | No change |
| NM_001190703 | Dlk1          | 0 | 1 | 1.33625     | 0.0343823 | 0.106252  | No change |
| NM_001190718 | Dcaf12l1      | 0 | 1 | -0.256983   | 1.47435   | 1.16984   | No change |
| NM_001190732 | Mtrnr2l       | 0 | 1 | 0.113855    | 0         | 0         | No change |

|              |               |   |   |            |           |           |           |
|--------------|---------------|---|---|------------|-----------|-----------|-----------|
| NM_001190795 | Ddx55         | 0 | 1 | -0.0950921 | 2.20057   | 1.9577    | No change |
| NM_001190846 | Kat2b         | 0 | 1 | 0.0493333  | 8.53314   | 8.4048    | No change |
| NM_001190885 | Kcnip1        | 0 | 1 | 0.0467406  | 1.30922   | 1.2859    | No change |
| NM_001191001 | Lins          | 0 | 1 | 0.167543   | 2.79945   | 2.99358   | No change |
| NM_001191004 | Lsm6          | 0 | 1 | 0.25885    | 4.14381   | 4.72185   | No change |
| NM_001191008 | Sstr5         | 0 | 1 | -0.886145  | 0.0270023 | 0         | No change |
| NM_001191018 | Krtap22-2     | 0 | 1 | 0.113855   | 0         | 0         | No change |
| NM_001193305 | Mical2        | 0 | 1 | 0.0891928  | 2.21578   | 2.24347   | No change |
| NM_001193666 | Gm13304       | 0 | 1 | 0.279278   | 8.52071   | 9.85366   | No change |
| NM_001193668 | Gm10591       | 0 | 1 | 0.279278   | 8.52071   | 9.85366   | No change |
| NM_001194921 | Cldn18        | 0 | 1 | -0.886145  | 0.0251327 | 0         | No change |
| NM_001194940 | Dlc1          | 0 | 1 | 0.271136   | 1.84527   | 2.12092   | No change |
| NM_001195025 | Nuak2         | 0 | 1 | 0.00850181 | 1.55763   | 1.48991   | No change |
| NM_001195031 | Pag1          | 0 | 1 | -0.339051  | 1.62136   | 1.21783   | No change |
| NM_001195033 | Abhd12b       | 0 | 1 | 0.113855   | 0         | 0         | No change |
| NM_001195036 | Ect2l         | 0 | 1 | 1.00694    | 0.144192  | 0.297066  | No change |
| NM_001195083 | Phc2          | 0 | 1 | 0.222004   | 9.10465   | 10.111    | No change |
| NM_001195088 | Tmc8          | 0 | 1 | 0.0358523  | 0.449632  | 0.437436  | No change |
| NM_001195091 | Gm6537        | 0 | 1 | -0.623111  | 0.265497  | 0.136745  | No change |
| NM_001195097 | 3425401B19Rik | 0 | 1 | 0.113855   | 0.0125641 | 0.0129423 | No change |
| NM_001195128 | Gm5294        | 0 | 1 | -0.886145  | 0.107055  | 0         | No change |
| NM_001195244 | 2900053A13Rik | 0 | 1 | 0.259194   | 12.6183   | 14.3823   | No change |
| NM_001195253 | Gm3336        | 0 | 1 | 0.791927   | 0.544476  | 0.934778  | No change |
| NM_001195258 | Gm14378       | 0 | 1 | -0.137684  | 1.55594   | 1.33565   | No change |
| NM_001195383 | 2300003K06Rik | 0 | 1 | 0.113855   | 0         | 0         | No change |
| NM_001195435 | 1190003K10Rik | 0 | 1 | 0.113855   | 0         | 0         | No change |
| NM_001195437 | Gm590         | 0 | 1 | -0.886145  | 0.139665  | 0         | No change |
| NM_001195485 | Srsf7         | 0 | 1 | -0.0177892 | 36.7883   | 34.5882   | No change |
| NM_001195496 | Dclk2         | 0 | 1 | -0.514176  | 0.272504  | 0.175442  | No change |
| NM_001195531 | Gm5741        | 0 | 1 | -0.886145  | 0.637435  | 0.218875  | No change |
| NM_001195544 | Gm12          | 0 | 1 | 0.113855   | 0         | 0         | No change |
| NM_001195596 | 2010003K15Rik | 0 | 1 | -0.886145  | 0.103402  | 0         | No change |
| NM_001195681 | Gm684         | 0 | 1 | 0.363214   | 2.86938   | 3.52418   | No change |
| NM_001195687 | Gm4975        | 0 | 1 | 0.113855   | 0         | 0         | No change |
| NM_001195693 | Plscr5        | 0 | 1 | -1.88615   | 0.187179  | 0         | No change |
| NM_001195717 | Gm12034       | 0 | 1 | 0.339736   | 8.67423   | 10.4759   | No change |
| NM_001195732 | Fam150a       | 0 | 1 | 0.113855   | 0         | 0         | No change |
| NM_001195760 | S100a2        | 0 | 1 | 0.113855   | 0         | 0         | No change |
| NM_001195816 | Pld5          | 0 | 1 | 0.113855   | 0.0426648 | 0.0439492 | No change |
| NM_001198560 | H2-Q7         | 0 | 1 | 0.113855   | 9.77371   | 10.0679   | No change |
| NM_001198635 | Mtap7         | 0 | 1 | 0.0738016  | 15.0122   | 15.0402   | No change |
| NM_001198785 | Aatk          | 0 | 1 | 0.554427   | 0.167593  | 0.239038  | No change |
| NM_001198835 | Coch          | 0 | 1 | -0.345577  | 0.897816  | 0.664731  | No change |
| NM_001198839 | Bcar1         | 0 | 1 | 0.126833   | 7.39845   | 7.69025   | No change |
| NM_001198841 | Csrp3         | 0 | 1 | 0.113855   | 0         | 0         | No change |
| NM_001198866 | Dctn1         | 0 | 1 | -0.0287973 | 6.5202    | 6.08253   | No change |
| NM_001198872 | Dync1i2       | 0 | 1 | 0.0357541  | 21.3694   | 20.8513   | No change |
| NM_001198914 | Myb           | 0 | 1 | 0.0782309  | 0.738077  | 0.741289  | No change |
| NM_001198955 | Gm7694        | 0 | 1 | 0.421977   | 0.745476  | 0.955215  | No change |
| NM_001198971 | BC049352      | 0 | 1 | -0.471108  | 0.0830172 | 0.0427582 | No change |
| NM_001198984 | Tcof1         | 0 | 1 | 0.0199369  | 3.56821   | 3.44299   | No change |
| NM_001199003 | Rgs7          | 0 | 1 | 0.791927   | 0.112092  | 0.202065  | No change |
| NM_001199004 | Golga5        | 0 | 1 | 0.0215476  | 20.637    | 19.9391   | No change |
| NM_001199015 | Slc7a9        | 0 | 1 | 0.971836   | 0.576292  | 1.10813   | No change |
| NM_001199020 | Angel2        | 0 | 1 | 0.0980009  | 12.3398   | 12.5721   | No change |
| NM_001199048 | Zfp942        | 0 | 1 | -0.234068  | 9.81021   | 7.93537   | No change |
| NM_001199062 | Gm4461        | 0 | 1 | 0.113855   | 0         | 0         | No change |
| NM_001199122 | Ghitm         | 0 | 1 | -0.0305907 | 64.4264   | 60.0407   | No change |
| NM_001199137 | Macf1         | 0 | 1 | 0.0564652  | 23.4965   | 23.2597   | No change |
| NM_001199146 | Gpsm1         | 0 | 1 | -0.398958  | 2.53747   | 1.82519   | No change |
| NM_001199186 | Slc44a2       | 0 | 1 | -0.104325  | 6.87454   | 6.08468   | No change |
| NM_001199213 | Serpnb12      | 0 | 1 | -0.471108  | 0.0860938 | 0.0443428 | No change |
| NM_001199217 | Slc38a3       | 0 | 1 | -0.227182  | 0.513707  | 0.411578  | No change |
| NM_001199306 | 2810007J24Rik | 0 | 1 | -0.886145  | 0.0332346 | 0         | No change |
| NM_001199321 | Zfp94         | 0 | 1 | -0.371572  | 2.35803   | 1.7273    | No change |
| NM_001199333 | LOC100048884  | 0 | 1 | -1.47111   | 0.157143  | 0         | No change |
| NM_001199334 | Gm10229       | 0 | 1 | 0.113855   | 0         | 0         | No change |
| NM_001199336 | Gm5894        | 0 | 1 | 0.113855   | 0         | 0         | No change |
| NM_001199351 | Pnck          | 0 | 1 | 0.528892   | 1.11577   | 1.54722   | No change |
| NM_001199484 | 4931406C07Rik | 0 | 1 | 0.0711052  | 6.90355   | 6.90298   | No change |
| NM_001199556 | AW551984      | 0 | 1 | 1.69882    | 0         | 0.0333679 | No change |
| NM_001199696 | Bai2          | 0 | 1 | 1.28378    | 0.0413118 | 0.113481  | No change |
| NM_001199840 | Olf1354       | 0 | 1 | 0.113855   | 0         | 0         | No change |
| NM_001199927 | Fam198a       | 0 | 1 | 0.323308   | 0.774089  | 0.926003  | No change |
| NM_001199940 | Serpina3i     | 0 | 1 | -0.333604  | 0.921612  | 0.687465  | No change |
| NM_001199945 | Serpine3      | 0 | 1 | -0.886145  | 0.347968  | 0.153618  | No change |

|              |               |   |   |            |           |           |           |
|--------------|---------------|---|---|------------|-----------|-----------|-----------|
| NM_001199953 | Pate          | 0 | 1 | -0.154078  | 10.3912   | 8.85853   | No change |
| NM_001199971 | Tac2          | 0 | 1 | 0.765932   | 0.49022   | 0.841629  | No change |
| NM_001199995 | Mup12         | 0 | 1 | -1.47111   | 0.158034  | 0         | No change |
| NM_001199999 | Mup14         | 0 | 1 | -1.88615   | 0.225787  | 0         | No change |
| NM_001200004 | Mup15         | 0 | 1 | 1.11385    | 0         | 0.0807547 | No change |
| NM_001200006 | Mup17         | 0 | 1 | -1.47111   | 0.15732   | 0         | No change |
| NM_001200023 | Zfp963        | 0 | 1 | 0.32798    | 1.4906    | 1.78616   | No change |
| NM_001200027 | Olf612        | 0 | 1 | 0.113855   | 0         | 0         | No change |
| NM_001200041 | Gm1078        | 0 | 1 | -0.471108  | 0.0442214 | 0.0227763 | No change |
| NM_001200055 | AU018829      | 0 | 1 | -2.6935    | 0.144143  | 0         | No change |
| NM_001201323 | 5430421N21Rik | 0 | 1 | 0.113855   | 0         | 0         | No change |
| NM_001201332 | 2410004P03Rik | 0 | 1 | 0.21339    | 0.503898  | 0.558995  | No change |
| NM_001201367 | Tmem200b      | 0 | 1 | -0.638218  | 1.57699   | 0.943239  | No change |
| NM_001201389 | LOC100504710  | 0 | 1 | -1.47111   | 0.101519  | 0         | No change |
| NM_001201460 | H2-Q9         | 0 | 1 | 0.0994995  | 9.20991   | 9.39277   | No change |
| NM_001204129 | C1qtnf1       | 0 | 1 | 0.429357   | 0.69804   | 0.898817  | No change |
| NM_001204134 | C1qtnf3       | 0 | 1 | -0.433633  | 3.09564   | 2.17292   | No change |
| NM_001204152 | C1qtnf6       | 0 | 1 | -0.829562  | 0.739448  | 0.380854  | No change |
| NM_001204165 | Rapgef4       | 0 | 1 | -0.317861  | 0.944483  | 0.716886  | No change |
| NM_001204201 | Spp1          | 0 | 1 | -0.725681  | 1.55923   | 0.876093  | No change |
| NM_001204239 | Clec1b        | 0 | 1 | 0.113855   | 0.064891  | 0.0668445 | No change |
| NM_001204241 | Clec4a3       | 0 | 1 | 0.698817   | 0.41768   | 0.676114  | No change |
| NM_001204252 | Clec10a       | 0 | 1 | -0.77923   | 0.557172  | 0.286973  | No change |
| NM_001204333 | Cyp4f14       | 0 | 1 | -0.0116761 | 0.376349  | 0.352435  | No change |
| NM_001204340 | Gucy1b2       | 0 | 1 | -1.88615   | 0.0782481 | 0         | No change |
| NM_001204371 | Oprk1         | 0 | 1 | 0.113855   | 0         | 0         | No change |
| NM_001204427 | Sprr3         | 0 | 1 | 0.113855   | 0         | 0         | No change |
| NM_001204820 | Myadml2       | 0 | 1 | -0.886145  | 0.0627864 | 0         | No change |
| NM_001204910 | Al607873      | 0 | 1 | 0.177985   | 0.860407  | 0.927532  | No change |
| NM_001204913 | LOC100504323  | 0 | 1 | -0.886145  | 0.0449342 | 0         | No change |
| NM_001204916 | H60c          | 0 | 1 | -0.886145  | 0.0649515 | 0         | No change |
| NM_001204920 | Gm5780        | 0 | 1 | 0.113855   | 1.54873   | 1.59535   | No change |
| NM_001204921 | Gm4799        | 0 | 1 | 0.210716   | 34.2268   | 37.7124   | No change |
| NM_001204959 | Retn          | 0 | 1 | -3.20807   | 1.07773   | 0         | No change |
| NM_001205009 | Gm2696        | 0 | 1 | -0.886145  | 0.0963941 | 0         | No change |
| NM_001205011 | LOC100504232  | 0 | 1 | 0.113855   | 0         | 0         | No change |
| NM_001205025 | Jagn1         | 0 | 1 | 0.176682   | 21.5823   | 23.2245   | No change |
| NM_001205030 | Gm11568       | 0 | 1 | 0.113855   | 0         | 0         | No change |
| NM_001205032 | LOC100502831  | 0 | 1 | 0.113855   | 0         | 0         | No change |
| NM_001205033 | LOC100502953  | 0 | 1 | 0.113855   | 0         | 0         | No change |
| NM_001205034 | LOC100503388  | 0 | 1 | -0.886145  | 0.0932971 | 0         | No change |
| NM_001205035 | LOC100502921  | 0 | 1 | 1.11385    | 0         | 0.197771  | No change |
| NM_001205036 | LOC100504608  | 0 | 1 | 1.85082    | 0.199408  | 0.924347  | No change |
| NM_001205037 | Gm11544       | 0 | 1 | 0.113855   | 0         | 0         | No change |
| NM_001205052 | Jdp2          | 0 | 1 | 0.77682    | 0.489229  | 0.824657  | No change |
| NM_001205068 | Jmjd4         | 0 | 1 | 0.0751743  | 2.97171   | 2.97976   | No change |
| NM_001205076 | Jph2          | 0 | 1 | -0.400718  | 0.82189   | 0.587459  | No change |
| NM_001205082 | Scarb1        | 0 | 1 | 0.00832615 | 32.603    | 31.2135   | No change |
| NM_001205085 | Tbx20         | 0 | 1 | -0.886145  | 0.0488388 | 0         | No change |
| NM_001205102 | Lrit3         | 0 | 1 | -1.47111   | 0.0828199 | 0         | No change |
| NM_001205132 | Yes1          | 0 | 1 | 0.158544   | 7.4635    | 7.9306    | No change |
| NM_001205156 | Yipf1         | 0 | 1 | 0.168303   | 11.6248   | 12.4376   | No change |
| NM_001205173 | Iffo2         | 0 | 1 | 0.454892   | 1.08514   | 1.41924   | No change |
| NM_001205188 | Ppp2r2a       | 0 | 1 | -0.0396197 | 2.84892   | 2.63578   | No change |
| NM_001205204 | Astn1         | 0 | 1 | -0.663753  | 0.106122  | 0.0596271 | No change |
| NM_001205214 | Rxb           | 0 | 1 | 0.326849   | 4.63208   | 5.53497   | No change |
| NM_001205234 | Nrxn2         | 0 | 1 | -1.47111   | 0.0837152 | 0.0215589 | No change |
| NM_001205239 | Parp6         | 0 | 1 | -0.145665  | 4.18568   | 3.59748   | No change |
| NM_001205242 | A430107P09Rik | 0 | 1 | 0.113855   | 0         | 0         | No change |
| NM_001205243 | Fasl          | 0 | 1 | 0.113855   | 0.40605   | 0.418274  | No change |
| NM_001205249 | Gm9994        | 0 | 1 | 0.229332   | 0.646939  | 0.726997  | No change |
| NM_001205253 | Thsd1         | 0 | 1 | -0.602352  | 0.731556  | 0.452147  | No change |
| NM_001205282 | Gm14496       | 0 | 1 | 0.113855   | 0         | 0         | No change |
| NM_001205311 | Slc12a3       | 0 | 1 | -1.26466   | 0.253506  | 0.0870457 | No change |
| NM_001205312 | Tyk2          | 0 | 1 | 0.202769   | 5.83516   | 6.39386   | No change |
| NM_001205313 | Stat1         | 0 | 1 | -0.10661   | 5.06241   | 4.47383   | No change |
| NM_001205321 | Scn10a        | 0 | 1 | -3.05607   | 0.0868989 | 0         | No change |
| NM_001205322 | Prf3d1        | 0 | 1 | 0.113855   | 0         | 0         | No change |
| NM_001205343 | Papln         | 0 | 1 | -0.505541  | 1.67263   | 1.11584   | No change |
| NM_001205349 | Lipk          | 0 | 1 | -0.22318   | 0.715597  | 0.576892  | No change |
| NM_001205363 | Clec9a        | 0 | 1 | -0.0305351 | 0.423151  | 0.3923    | No change |
| NM_001205396 | Gprc5d        | 0 | 1 | -0.886145  | 0.0503198 | 0         | No change |
| NM_001206661 | Tmem200c      | 0 | 1 | 0.0524543  | 0.498891  | 0.491566  | No change |
| NM_007378    | Abca4         | 0 | 1 | -0.886145  | 0.0673083 | 0.0297148 | No change |
| NM_007385    | Apoc4         | 0 | 1 | 0.632322   | 5.40721   | 8.04554   | No change |
| NM_007390    | Chrna7        | 0 | 1 | -2.20807   | 0.29997   | 0.0343333 | No change |



|           |          |   |   |            |           |           |           |
|-----------|----------|---|---|------------|-----------|-----------|-----------|
| NM_007397 | Acvr2b   | 0 | 1 | 0.998378   | 0.491661  | 0.970719  | No change |
| NM_007412 | Gpr182   | 0 | 1 | 0.113855   | 0.205705  | 0.211898  | No change |
| NM_007413 | Adora2b  | 0 | 1 | 0.87939    | 0.34015   | 0.622915  | No change |
| NM_007414 | Adprh    | 0 | 1 | -0.142615  | 13.4719   | 11.6099   | No change |
| NM_007416 | Adra1b   | 0 | 1 | -0.208073  | 0.0914906 | 0.0706836 | No change |
| NM_007417 | Adra2a   | 0 | 1 | 0.113855   | 0.128348  | 0.132212  | No change |
| NM_007420 | Adrb2    | 0 | 1 | 0.389489   | 0.585109  | 0.736661  | No change |
| NM_007421 | Adssl1   | 0 | 1 | 0.365394   | 0.778257  | 0.962023  | No change |
| NM_007423 | Afp      | 0 | 1 | 0.113855   | 0         | 0         | No change |
| NM_007424 | Acan     | 0 | 1 | -1.47111   | 0.104231  | 0.0292825 | No change |
| NM_007425 | Ager     | 0 | 1 | 0.34832    | 0.813932  | 0.995641  | No change |
| NM_007426 | Angpt2   | 0 | 1 | -0.471108  | 2.16822   | 1.47933   | No change |
| NM_007427 | Agrp     | 0 | 1 | -0.824745  | 2.31958   | 1.19471   | No change |
| NM_007429 | Agtr2    | 0 | 1 | 0.258245   | 0.437403  | 0.500634  | No change |
| NM_007432 | Akp3     | 0 | 1 | -2.20807   | 0.165936  | 0         | No change |
| NM_007439 | Alk      | 0 | 1 | -2.88615   | 0.082435  | 0         | No change |
| NM_007441 | Alx3     | 0 | 1 | 0.113855   | 0         | 0         | No change |
| NM_007442 | Alx4     | 0 | 1 | -0.208073  | 0.053579  | 0.041394  | No change |
| NM_007443 | Ambp     | 0 | 1 | -1.6935    | 0.339138  | 0.0582246 | No change |
| NM_007445 | Amh      | 0 | 1 | 0.528892   | 0.0837152 | 0.129353  | No change |
| NM_007448 | Ang5     | 0 | 1 | 0.113855   | 0         | 0         | No change |
| NM_007449 | Ang2     | 0 | 1 | 0.113855   | 0         | 0         | No change |
| NM_007457 | Ap1s1    | 0 | 1 | 0.082146   | 9.98732   | 10.0631   | No change |
| NM_007461 | Apba2    | 0 | 1 | 0.824348   | 0.209982  | 0.367715  | No change |
| NM_007466 | Api5     | 0 | 1 | -0.0819025 | 21.1978   | 19.0628   | No change |
| NM_007468 | Apoa4    | 0 | 1 | 0.113855   | 0         | 0         | No change |
| NM_007477 | Arf2     | 0 | 1 | 0.0452677  | 7.31265   | 7.1818    | No change |
| NM_007482 | Arg1     | 0 | 1 | 0.113855   | 0.330298  | 0.340242  | No change |
| NM_007485 | Rhod     | 0 | 1 | 0.329244   | 6.09423   | 7.29714   | No change |
| NM_007486 | Arhgdib  | 0 | 1 | 0.273053   | 7.53951   | 8.68018   | No change |
| NM_007489 | Arltl    | 0 | 1 | 0.454892   | 1.77592   | 2.32381   | No change |
| NM_007490 | Art2a-ps | 0 | 1 | 0.376889   | 0.322652  | 0.415457  | No change |
| NM_007492 | Arx      | 0 | 1 | 0.113855   | 0.306455  | 0.31568   | No change |
| NM_007493 | Asgr2    | 0 | 1 | 0.113855   | 0         | 0         | No change |
| NM_007494 | Ass1     | 0 | 1 | -0.0173897 | 3.88845   | 3.65337   | No change |
| NM_007496 | Zfhx3    | 0 | 1 | 0.0448132  | 1.35664   | 1.33197   | No change |
| NM_007500 | Atoh1    | 0 | 1 | 0.113855   | 0         | 0         | No change |
| NM_007501 | Neurod4  | 0 | 1 | 0.113855   | 0         | 0         | No change |
| NM_007504 | Atp2a1   | 0 | 1 | -0.760614  | 0.648306  | 0.354781  | No change |
| NM_007512 | Atpif1   | 0 | 1 | -0.00134   | 164.987   | 156.901   | No change |
| NM_007515 | Slc7a3   | 0 | 1 | -0.371572  | 0.382121  | 0.272509  | No change |
| NM_007517 | Aup1     | 0 | 1 | 0.0763801  | 10.7468   | 10.7853   | No change |
| NM_007519 | Baat     | 0 | 1 | -0.886145  | 0.0358134 | 0         | No change |
| NM_007522 | Bad      | 0 | 1 | -0.180328  | 9.83957   | 8.25695   | No change |
| NM_007524 | Nkx3-2   | 0 | 1 | 0.113855   | 0         | 0         | No change |
| NM_007526 | Barx1    | 0 | 1 | -1.47111   | 0.102414  | 0         | No change |
| NM_007528 | Bcl6b    | 0 | 1 | 0.176139   | 1.36294   | 1.46683   | No change |
| NM_007533 | Bckdha   | 0 | 1 | 0.0793341  | 28.2231   | 28.3844   | No change |
| NM_007535 | Bcl2a1c  | 0 | 1 | 0.113855   | 0         | 0         | No change |
| NM_007538 | Opn1sw   | 0 | 1 | 0.336247   | 0.318101  | 0.387254  | No change |
| NM_007539 | Bdkrb1   | 0 | 1 | -1.05607   | 0.416699  | 0.160966  | No change |
| NM_007542 | Bgn      | 0 | 1 | 0.266836   | 8.57669   | 9.82656   | No change |
| NM_007545 | Hrk      | 0 | 1 | -1.47111   | 0.0259758 | 0         | No change |
| NM_007546 | Bik      | 0 | 1 | -1.15916   | 2.06936   | 0.837434  | No change |
| NM_007549 | Blk      | 0 | 1 | -2.88615   | 0.197111  | 0         | No change |
| NM_007551 | Cxcr5    | 0 | 1 | -0.99306   | 0.719583  | 0.329442  | No change |
| NM_007553 | Bmp2     | 0 | 1 | -0.301183  | 0.193976  | 0.142726  | No change |
| NM_007555 | Bmp5     | 0 | 1 | 0.528892   | 0.0551368 | 0.085195  | No change |
| NM_007556 | Bmp6     | 0 | 1 | 0.528892   | 0.404855  | 0.565987  | No change |
| NM_007558 | Bmp8a    | 0 | 1 | -0.181601  | 0.947707  | 0.788499  | No change |
| NM_007559 | Bmp8b    | 0 | 1 | -0.538222  | 0.237051  | 0.146512  | No change |
| NM_007564 | Zfp361l1 | 0 | 1 | 0.159984   | 6.44613   | 6.85671   | No change |
| NM_007568 | Btc      | 0 | 1 | 0.791927   | 0.218093  | 0.374431  | No change |
| NM_007575 | Ciita    | 0 | 1 | -0.41666   | 0.689761  | 0.487616  | No change |
| NM_007582 | Cacng1   | 0 | 1 | 0.85082    | 0.289663  | 0.53709   | No change |
| NM_007583 | Cacng2   | 0 | 1 | 0.113855   | 0         | 0         | No change |
| NM_007586 | Calb2    | 0 | 1 | -1.47111   | 0.0974045 | 0         | No change |
| NM_007592 | Car8     | 0 | 1 | 0.528892   | 0.0243596 | 0.0376394 | No change |
| NM_007596 | Cam1     | 0 | 1 | 0.136153   | 16.0791   | 16.822    | No change |
| NM_007606 | Car3     | 0 | 1 | -1.88615   | 0.501388  | 0.0939058 | No change |
| NM_007609 | Casp4    | 0 | 1 | 0.28378    | 0.730024  | 0.852267  | No change |
| NM_007611 | Casp7    | 0 | 1 | 0.358274   | 3.82733   | 4.67604   | No change |
| NM_007618 | Serpina6 | 0 | 1 | -1.88615   | 0.143009  | 0         | No change |
| NM_007622 | Cbx1     | 0 | 1 | -0.0160255 | 8.20561   | 7.72007   | No change |
| NM_007623 | Cbx2     | 0 | 1 | -0.127153  | 0.950358  | 0.825404  | No change |
| NM_007625 | Cbx4     | 0 | 1 | 0.129452   | 2.45407   | 2.55558   | No change |

|           |         |   |   |             |           |           |           |
|-----------|---------|---|---|-------------|-----------|-----------|-----------|
| NM_007627 | Cckbr   | 0 | 1 | 1.43578     | 0.028068  | 0.115652  | No change |
| NM_007640 | Cd1d2   | 0 | 1 | 1.37689     | 0.224093  | 0.634808  | No change |
| NM_007641 | Ms4a1   | 0 | 1 | -3.05607    | 0.271047  | 0         | No change |
| NM_007642 | Cd28    | 0 | 1 | 0.421977    | 0.322877  | 0.415746  | No change |
| NM_007646 | Cd38    | 0 | 1 | -0.200254   | 1.04714   | 0.86293   | No change |
| NM_007648 | Cd3e    | 0 | 1 | 0.698817    | 0.53386   | 0.849893  | No change |
| NM_007649 | Cd48    | 0 | 1 | 0.476425    | 1.64773   | 2.20025   | No change |
| NM_007650 | Cd5     | 0 | 1 | 0.113855    | 0.404212  | 0.416381  | No change |
| NM_007651 | Cd53    | 0 | 1 | -0.00813571 | 2.73598   | 2.58775   | No change |
| NM_007655 | Cd79a   | 0 | 1 | -0.886145   | 0.262596  | 0.1082    | No change |
| NM_007661 | Cdk11b  | 0 | 1 | -0.0713601  | 4.44161   | 4.02074   | No change |
| NM_007662 | Cdh15   | 0 | 1 | -0.886145   | 0.0245139 | 0         | No change |
| NM_007666 | Cdh6    | 0 | 1 | -0.0236487  | 0.264791  | 0.245486  | No change |
| NM_007670 | Cdkn2b  | 0 | 1 | -0.278463   | 2.05126   | 1.59765   | No change |
| NM_007673 | Cdx2    | 0 | 1 | 1.11385     | 0         | 0.033469  | No change |
| NM_007674 | Cdx4    | 0 | 1 | 0.113855    | 0         | 0         | No change |
| NM_007676 | Psg16   | 0 | 1 | -1.47111    | 0.152635  | 0.0314459 | No change |
| NM_007681 | Cenpa   | 0 | 1 | 0.561314    | 0.521264  | 0.751738  | No change |
| NM_007683 | Cenpc1  | 0 | 1 | -0.176696   | 13.3882   | 11.2715   | No change |
| NM_007689 | Chad    | 0 | 1 | 0.361782    | 0.632422  | 0.781753  | No change |
| NM_007690 | Chd1    | 0 | 1 | -0.0138137  | 5.39553   | 5.08648   | No change |
| NM_007692 | Chkb    | 0 | 1 | -0.267339   | 12.8016   | 10.1154   | No change |
| NM_007695 | Chi3l1  | 0 | 1 | -0.0116761  | 0.453891  | 0.42505   | No change |
| NM_007701 | Vsx2    | 0 | 1 | -0.886145   | 0.021916  | 0         | No change |
| NM_007703 | Elovl3  | 0 | 1 | 0.113855    | 0.0370904 | 0.038207  | No change |
| NM_007707 | Socs3   | 0 | 1 | -0.171547   | 0.972222  | 0.817004  | No change |
| NM_007709 | Cited1  | 0 | 1 | -0.11903    | 11.4485   | 10.0242   | No change |
| NM_007710 | Ckm     | 0 | 1 | 0.628428    | 0.295518  | 0.456621  | No change |
| NM_007718 | Ccr11   | 0 | 1 | -0.471108   | 0.0954698 | 0.0491719 | No change |
| NM_007720 | Ccr8    | 0 | 1 | 0.113855    | 0         | 0         | No change |
| NM_007721 | Ccr10   | 0 | 1 | -0.00162241 | 0.48482   | 0.457798  | No change |
| NM_007723 | Cnga1   | 0 | 1 | -1.88615    | 0.0763619 | 0         | No change |
| NM_007726 | Cnr1    | 0 | 1 | -0.288904   | 0.924119  | 0.717044  | No change |
| NM_007729 | Col11a1 | 0 | 1 | 0.026392    | 0.478989  | 0.463804  | No change |
| NM_007731 | Col13a1 | 0 | 1 | 0.58334     | 0.288385  | 0.420844  | No change |
| NM_007734 | Col4a3  | 0 | 1 | 0.0611745   | 2.02384   | 2.00971   | No change |
| NM_007735 | Col4a4  | 0 | 1 | 0.0608364   | 3.4543    | 3.42956   | No change |
| NM_007739 | Col8a1  | 0 | 1 | 0.347527    | 1.22747   | 1.48921   | No change |
| NM_007741 | Col9a2  | 0 | 1 | -0.208073   | 0.101519  | 0.0784315 | No change |
| NM_007745 | Cort    | 0 | 1 | 0.113855    | 0         | 0         | No change |
| NM_007747 | Cox5a   | 0 | 1 | -0.374892   | 17.4232   | 12.7605   | No change |
| NM_007751 | Cox8b   | 0 | 1 | 1.69882     | 0         | 0.395543  | No change |
| NM_007753 | Cpa3    | 0 | 1 | 0.528892    | 0.0959297 | 0.148226  | No change |
| NM_007756 | Cplx1   | 0 | 1 | -1.88615    | 0.0953827 | 0         | No change |
| NM_007758 | Cr2     | 0 | 1 | 0.0799075   | 0.471581  | 0.474211  | No change |
| NM_007759 | Crabp2  | 0 | 1 | -0.0787903  | 0.542056  | 0.478606  | No change |
| NM_007762 | Crhr1   | 0 | 1 | -0.471108   | 0.0574077 | 0.0295679 | No change |
| NM_007764 | Crkl    | 0 | 1 | 0.213991    | 5.75512   | 6.35581   | No change |
| NM_007768 | Crp     | 0 | 1 | 0.113855    | 0.205221  | 0.211399  | No change |
| NM_007769 | Dmbt1   | 0 | 1 | -1.88615    | 0.122797  | 0.0229989 | No change |
| NM_007773 | Crybb2  | 0 | 1 | -0.886145   | 0.096261  | 0         | No change |
| NM_007774 | Cryga   | 0 | 1 | -0.886145   | 0.113322  | 0         | No change |
| NM_007776 | Crygd   | 0 | 1 | 0.113855    | 0         | 0         | No change |
| NM_007777 | Cryge   | 0 | 1 | -0.886145   | 0.108556  | 0         | No change |
| NM_007780 | Csf2rb  | 0 | 1 | -0.720135   | 0.58504   | 0.331459  | No change |
| NM_007781 | Csf2rb2 | 0 | 1 | -0.393105   | 0.392296  | 0.279766  | No change |
| NM_007782 | Csf3r   | 0 | 1 | 0.274319    | 0.33069   | 0.383226  | No change |
| NM_007784 | Csn1s1  | 0 | 1 | 0.113855    | 0         | 0         | No change |
| NM_007785 | Csn1s2a | 0 | 1 | -2.6935     | 0.454519  | 0         | No change |
| NM_007786 | Csn3    | 0 | 1 | -1.6935     | 0.261839  | 0.0449536 | No change |
| NM_007790 | Smc3    | 0 | 1 | -0.189053   | 9.99923   | 8.34675   | No change |
| NM_007792 | Csrp2   | 0 | 1 | -0.276935   | 4.5469    | 3.55321   | No change |
| NM_007799 | Ctse    | 0 | 1 | -0.14918    | 0.16437   | 0.135455  | No change |
| NM_007800 | Ctsg    | 0 | 1 | 0.113855    | 0.0695538 | 0.0716477 | No change |
| NM_007806 | Cyba    | 0 | 1 | 0.0944895   | 6.79483   | 6.9048    | No change |
| NM_007807 | Cybb    | 0 | 1 | 0.228254    | 3.00653   | 3.35387   | No change |
| NM_007811 | Cyp26a1 | 0 | 1 | -0.886145   | 0.430445  | 0.201547  | No change |
| NM_007812 | Cyp2a5  | 0 | 1 | 0.113855    | 0.0406373 | 0.0418606 | No change |
| NM_007813 | Cyp2b13 | 0 | 1 | 0.113855    | 0         | 0         | No change |
| NM_007814 | Cyp2b19 | 0 | 1 | -1.47111    | 0.0517202 | 0         | No change |
| NM_007815 | Cyp2c29 | 0 | 1 | -0.886145   | 0.0390218 | 0         | No change |
| NM_007817 | Cyp2f2  | 0 | 1 | -1.88615    | 0.114878  | 0         | No change |
| NM_007818 | Cyp3a11 | 0 | 1 | 0.113855    | 0         | 0         | No change |
| NM_007819 | Cyp3a13 | 0 | 1 | 1.11385     | 0         | 0.0242947 | No change |
| NM_007820 | Cyp3a16 | 0 | 1 | 0.113855    | 0         | 0         | No change |
| NM_007822 | Cyp4a14 | 0 | 1 | -0.886145   | 0.0837991 | 0.0287739 | No change |

|           |          |   |   |            |           |           |           |
|-----------|----------|---|---|------------|-----------|-----------|-----------|
| NM_007823 | Cyp4b1   | 0 | 1 | 0.616355   | 0.856728  | 1.26622   | No change |
| NM_007824 | Cyp7a1   | 0 | 1 | -1.47111   | 0.0334098 | 0         | No change |
| NM_007831 | Dcc      | 0 | 1 | -2.47111   | 0.0337496 | 0         | No change |
| NM_007832 | Dck      | 0 | 1 | -0.0536019 | 1.64144   | 1.50298   | No change |
| NM_007844 | Defa-rs1 | 0 | 1 | 0.113855   | 0         | 0         | No change |
| NM_007848 | Defa-rs7 | 0 | 1 | 1.11385    | 0         | 0.171339  | No change |
| NM_007849 | Defa25   | 0 | 1 | 0.113855   | 0         | 0         | No change |
| NM_007850 | Defa3    | 0 | 1 | -0.208073  | 0.679931  | 0.5253    | No change |
| NM_007851 | Defa5    | 0 | 1 | 0.113855   | 0         | 0         | No change |
| NM_007852 | Defa6    | 0 | 1 | -0.886145  | 0.247138  | 0         | No change |
| NM_007854 | Slc29a2  | 0 | 1 | -0.14918   | 0.140908  | 0.11612   | No change |
| NM_007855 | Twist2   | 0 | 1 | 0.599282   | 0.212478  | 0.328312  | No change |
| NM_007859 | Dffb     | 0 | 1 | 0.0129259  | 2.48417   | 2.38368   | No change |
| NM_007860 | Dio1     | 0 | 1 | -0.430466  | 1.42401   | 0.992303  | No change |
| NM_007861 | Dld      | 0 | 1 | -0.0175197 | 32.8113   | 30.8544   | No change |
| NM_007867 | Dlx4     | 0 | 1 | -1.20807   | 0.153171  | 0.0394456 | No change |
| NM_007873 | Doc2b    | 0 | 1 | -0.812145  | 0.607453  | 0.321326  | No change |
| NM_007877 | Drd3     | 0 | 1 | 0.113855   | 0         | 0         | No change |
| NM_007878 | Drd4     | 0 | 1 | -0.596639  | 0.886811  | 0.537358  | No change |
| NM_007881 | Atn1     | 0 | 1 | 0.24556    | 2.14025   | 2.41698   | No change |
| NM_007882 | Dsc3     | 0 | 1 | -2.20807   | 0.0525489 | 0         | No change |
| NM_007887 | Dub1     | 0 | 1 | 0.698817   | 0.0263092 | 0.0542023 | No change |
| NM_007888 | Dvl2     | 0 | 1 | -0.321647  | 3.34811   | 2.54387   | No change |
| NM_007889 | Dvl3     | 0 | 1 | 0.442478   | 0.99123   | 1.28849   | No change |
| NM_007893 | E4f1     | 0 | 1 | 0.252561   | 8.82669   | 10.0128   | No change |
| NM_007894 | Ear1     | 0 | 1 | -2.47111   | 0.489417  | 0         | No change |
| NM_007895 | Ear2     | 0 | 1 | -1.6935    | 0.584019  | 0.100267  | No change |
| NM_007897 | Ebf1     | 0 | 1 | -0.234068  | 0.403567  | 0.319782  | No change |
| NM_007902 | Edn2     | 0 | 1 | -0.886145  | 0.0560233 | 0         | No change |
| NM_007906 | Eef1a2   | 0 | 1 | 0.113855   | 0         | 0         | No change |
| NM_007909 | Efna2    | 0 | 1 | 0.336247   | 0.163522  | 0.202133  | No change |
| NM_007911 | Efnb3    | 0 | 1 | -0.6935    | 0.281807  | 0.15631   | No change |
| NM_007918 | Eif4ebp1 | 0 | 1 | 0.194775   | 7.3174    | 7.97677   | No change |
| NM_007919 | Cela2a   | 0 | 1 | 0.698817   | 0.382088  | 0.629745  | No change |
| NM_007925 | Eln      | 0 | 1 | 0.0407913  | 1.47459   | 1.44303   | No change |
| NM_007930 | Enc1     | 0 | 1 | -0.205214  | 3.68816   | 3.04238   | No change |
| NM_007934 | Enpep    | 0 | 1 | -0.153626  | 1.05997   | 0.904211  | No change |
| NM_007935 | Epc1     | 0 | 1 | -0.0661967 | 10.1528   | 9.22919   | No change |
| NM_007937 | Epha5    | 0 | 1 | -0.596639  | 0.152148  | 0.0921934 | No change |
| NM_007939 | Epha8    | 0 | 1 | -2.47111   | 0.0739369 | 0         | No change |
| NM_007942 | Epo      | 0 | 1 | -0.886145  | 0.0974726 | 0         | No change |
| NM_007946 | Epx      | 0 | 1 | 0.113855   | 0         | 0         | No change |
| NM_007949 | Ercc2    | 0 | 1 | -0.144321  | 8.13445   | 7.00301   | No change |
| NM_007950 | Ereg     | 0 | 1 | -0.6935    | 0.101102  | 0.0520728 | No change |
| NM_007953 | Esrra    | 0 | 1 | 0.179443   | 9.32555   | 10.0546   | No change |
| NM_007954 | Ces1c    | 0 | 1 | 0.656997   | 1.2885    | 1.9519    | No change |
| NM_007967 | Evx2     | 0 | 1 | 0.113855   | 0         | 0         | No change |
| NM_007969 | Expi     | 0 | 1 | -0.471108  | 0.256224  | 0.131969  | No change |
| NM_007975 | F2rl3    | 0 | 1 | -0.371572  | 0.23732   | 0.162976  | No change |
| NM_007979 | F9       | 0 | 1 | -0.886145  | 0.0255005 | 0         | No change |
| NM_007980 | Fabp2    | 0 | 1 | -1.20807   | 0.432204  | 0.111304  | No change |
| NM_007986 | Fap      | 0 | 1 | 0.113855   | 0.0517202 | 0.0532772 | No change |
| NM_007991 | Fbl      | 0 | 1 | 0.100916   | 6.67465   | 6.81364   | No change |
| NM_007994 | Fbp2     | 0 | 1 | -0.301183  | 1.02331   | 0.776718  | No change |
| NM_007999 | Fen1     | 0 | 1 | -0.228469  | 11.7361   | 9.52891   | No change |
| NM_008001 | Fgd1     | 0 | 1 | 0.480637   | 0.736123  | 0.983719  | No change |
| NM_008003 | Fgf15    | 0 | 1 | 0.113855   | 0         | 0         | No change |
| NM_008004 | Fgf17    | 0 | 1 | -2.47111   | 0.206559  | 0         | No change |
| NM_008005 | Fgf18    | 0 | 1 | -1.47111   | 0.513865  | 0.132334  | No change |
| NM_008006 | Fgf2     | 0 | 1 | -0.371572  | 1.30361   | 0.929667  | No change |
| NM_008007 | Fgf3     | 0 | 1 | 0.113855   | 0         | 0         | No change |
| NM_008011 | Fgfr4    | 0 | 1 | -1.20807   | 0.420905  | 0.159738  | No change |
| NM_008019 | Fkbp1a   | 0 | 1 | 0.117249   | 36.0144   | 37.1861   | No change |
| NM_008023 | Foxb2    | 0 | 1 | -1.47111   | 0.0920039 | 0         | No change |
| NM_008024 | Foxl1    | 0 | 1 | 0.113855   | 0         | 0         | No change |
| NM_008026 | Fli1     | 0 | 1 | 0.0887638  | 1.28685   | 1.30233   | No change |
| NM_008027 | Flot1    | 0 | 1 | 0.430114   | 4.15525   | 5.33982   | No change |
| NM_008030 | Fmo3     | 0 | 1 | 0.765932   | 0.208039  | 0.357169  | No change |
| NM_008035 | Folr2    | 0 | 1 | 0.113855   | 1.96481   | 2.02396   | No change |
| NM_008036 | Fosb     | 0 | 1 | 0.254717   | 0.701359  | 0.798522  | No change |
| NM_008039 | Fpr2     | 0 | 1 | -0.301183  | 0.161326  | 0.110789  | No change |
| NM_008040 | Fpr-rs3  | 0 | 1 | -0.886145  | 0.0675319 | 0         | No change |
| NM_008041 | Fpr-rs4  | 0 | 1 | 0.113855   | 0         | 0         | No change |
| NM_008042 | Fpr3     | 0 | 1 | 0.113855   | 0         | 0         | No change |
| NM_008045 | Fshb     | 0 | 1 | 0.113855   | 0         | 0         | No change |
| NM_008046 | Fst      | 0 | 1 | 0.354863   | 0.298215  | 0.368631  | No change |

|           |          |   |   |            |           |           |           |
|-----------|----------|---|---|------------|-----------|-----------|-----------|
| NM_008055 | Fzd4     | 0 | 1 | -0.0654689 | 1.43736   | 1.30529   | No change |
| NM_008057 | Fzd7     | 0 | 1 | 0.168303   | 0.739102  | 0.791208  | No change |
| NM_008058 | Fzd8     | 0 | 1 | 0.449039   | 1.33304   | 1.73792   | No change |
| NM_008059 | G0s2     | 0 | 1 | 0.346516   | 3.22423   | 3.91742   | No change |
| NM_008061 | G6pc     | 0 | 1 | -2.47111   | 0.155218  | 0         | No change |
| NM_008065 | Gabpa    | 0 | 1 | 0.186005   | 7.07273   | 7.66001   | No change |
| NM_008066 | Gabra2   | 0 | 1 | 0.698817   | 0.0291358 | 0.0600259 | No change |
| NM_008072 | Gabrd    | 0 | 1 | 0.698817   | 0.185452  | 0.305656  | No change |
| NM_008073 | Gabrg2   | 0 | 1 | 0.113855   | 0         | 0         | No change |
| NM_008074 | Gabrg3   | 0 | 1 | -0.886145  | 0.0416575 | 0         | No change |
| NM_008076 | Gabbr2   | 0 | 1 | -0.886145  | 0.114878  | 0.0394456 | No change |
| NM_008077 | Gad1     | 0 | 1 | -0.41666   | 0.539252  | 0.37773   | No change |
| NM_008078 | Gad2     | 0 | 1 | -1.88615   | 0.0371696 | 0         | No change |
| NM_008082 | Galr1    | 0 | 1 | 1.02075    | 0.169924  | 0.350078  | No change |
| NM_008083 | Gap43    | 0 | 1 | -1.20807   | 0.214275  | 0.0551814 | No change |
| NM_008087 | Gas2     | 0 | 1 | -0.307283  | 2.54378   | 1.94847   | No change |
| NM_008093 | Gata5    | 0 | 1 | -1.88615   | 0.0633188 | 0         | No change |
| NM_008100 | Gcg      | 0 | 1 | 0.113855   | 0         | 0         | No change |
| NM_008101 | Gcgr     | 0 | 1 | 0.698817   | 0.0361291 | 0.0744334 | No change |
| NM_008102 | Gch1     | 0 | 1 | 0.247121   | 0.756436  | 0.857128  | No change |
| NM_008103 | Gcm1     | 0 | 1 | -0.886145  | 0.102792  | 0.0352955 | No change |
| NM_008104 | Gcm2     | 0 | 1 | 0.113855   | 0         | 0         | No change |
| NM_008106 | Opn1mw   | 0 | 1 | 0.376889   | 0.228501  | 0.294225  | No change |
| NM_008108 | Gdf3     | 0 | 1 | -0.886145  | 0.0991365 | 0.0340403 | No change |
| NM_008109 | Gdf5     | 0 | 1 | -1.47111   | 0.0602099 | 0         | No change |
| NM_008113 | Arhgdig  | 0 | 1 | -0.301183  | 1.01298   | 0.765214  | No change |
| NM_008117 | Gh       | 0 | 1 | 0.113855   | 0         | 0         | No change |
| NM_008118 | Gif      | 0 | 1 | -1.6935    | 0.272949  | 0.0468609 | No change |
| NM_008119 | Gip      | 0 | 1 | -1.88615   | 0.751696  | 0.110618  | No change |
| NM_008120 | Gja4     | 0 | 1 | 0.32166    | 3.00401   | 3.58071   | No change |
| NM_008121 | Gja5     | 0 | 1 | -0.471108  | 0.650079  | 0.438735  | No change |
| NM_008123 | Gja8     | 0 | 1 | -1.05607   | 0.399959  | 0.1545    | No change |
| NM_008130 | Gli3     | 0 | 1 | -0.050532  | 0.529355  | 0.48565   | No change |
| NM_008134 | Glycam1  | 0 | 1 | -0.886145  | 0.111509  | 0         | No change |
| NM_008135 | Slc6a9   | 0 | 1 | -0.232321  | 3.17367   | 2.5671    | No change |
| NM_008137 | Gna14    | 0 | 1 | -0.218221  | 2.1837    | 1.78257   | No change |
| NM_008140 | Gnat1    | 0 | 1 | 0.113855   | 0         | 0         | No change |
| NM_008145 | Gnrh1    | 0 | 1 | -0.248715  | 1.06809   | 0.825184  | No change |
| NM_008147 | Gp49a    | 0 | 1 | 0.0680511  | 1.65554   | 1.65037   | No change |
| NM_008148 | Gp5      | 0 | 1 | -0.886145  | 0.159189  | 0.0655925 | No change |
| NM_008152 | Gpr65    | 0 | 1 | 0.258245   | 1.91784   | 2.18724   | No change |
| NM_008154 | Gpr3     | 0 | 1 | -1.88615   | 0.357733  | 0.0670004 | No change |
| NM_008158 | Gpr27    | 0 | 1 | 0.528892   | 0.122268  | 0.188924  | No change |
| NM_008159 | Gpr33    | 0 | 1 | 1.69882    | 0         | 0.10352   | No change |
| NM_008166 | Grid1    | 0 | 1 | -0.886145  | 0.223635  | 0.104713  | No change |
| NM_008167 | Grid2    | 0 | 1 | 0.113855   | 0         | 0         | No change |
| NM_008170 | Grin2a   | 0 | 1 | -1.6935    | 0.0926768 | 0.0159111 | No change |
| NM_008176 | Cxcl1    | 0 | 1 | -0.301183  | 0.220315  | 0.151298  | No change |
| NM_008178 | Gsx1     | 0 | 1 | 0.113855   | 0         | 0         | No change |
| NM_008181 | Gsta1    | 0 | 1 | -2.88615   | 0.566609  | 0         | No change |
| NM_008190 | Guca2a   | 0 | 1 | -1.47111   | 0.248903  | 0         | No change |
| NM_008191 | Guca2b   | 0 | 1 | 1.11385    | 0         | 0.119652  | No change |
| NM_008192 | Gucy2e   | 0 | 1 | -0.471108  | 0.0418275 | 0.025852  | No change |
| NM_008196 | Gzmk     | 0 | 1 | -1.47111   | 0.439981  | 0.0906452 | No change |
| NM_008199 | H2-BI    | 0 | 1 | 1.11385    | 0         | 0.0616761 | No change |
| NM_008204 | H2-M2    | 0 | 1 | -1.30118   | 0.319274  | 0.0939672 | No change |
| NM_008205 | H2-M9    | 0 | 1 | 1.11385    | 0         | 0.0697677 | No change |
| NM_008206 | H2-Oa    | 0 | 1 | 0.113855   | 0.199313  | 0.205313  | No change |
| NM_008207 | H2-T24   | 0 | 1 | 0.347652   | 3.41757   | 4.14558   | No change |
| NM_008208 | H2-T3    | 0 | 1 | -0.886145  | 0.0319986 | 0         | No change |
| NM_008211 | H3f3b    | 0 | 1 | 0.0184905  | 171.627   | 165.483   | No change |
| NM_008213 | Hand1    | 0 | 1 | -0.886145  | 0.0367191 | 0         | No change |
| NM_008215 | Has1     | 0 | 1 | 0.765932   | 0.199884  | 0.343169  | No change |
| NM_008216 | Has2     | 0 | 1 | 1.43578    | 0.0164215 | 0.0676635 | No change |
| NM_008219 | Hbb-bh1  | 0 | 1 | 0.113855   | 0         | 0         | No change |
| NM_008221 | Hbb-y    | 0 | 1 | 0.113855   | 0         | 0         | No change |
| NM_008223 | Serpind1 | 0 | 1 | 0.397648   | 0.700752  | 0.885903  | No change |
| NM_008225 | Hcls1    | 0 | 1 | -0.371572  | 0.932463  | 0.675931  | No change |
| NM_008226 | Hcn2     | 0 | 1 | -0.208073  | 0.0872525 | 0.0674094 | No change |
| NM_008227 | Hcn3     | 0 | 1 | 0.229332   | 0.235016  | 0.264099  | No change |
| NM_008229 | Hdac2    | 0 | 1 | 0.0790894  | 10.1896   | 10.2456   | No change |
| NM_008236 | Hes2     | 0 | 1 | 0.336247   | 0.138225  | 0.170863  | No change |
| NM_008237 | Hes3     | 0 | 1 | -2.47111   | 0.190522  | 0         | No change |
| NM_008238 | Foxn1    | 0 | 1 | 0.113855   | 0         | 0         | No change |
| NM_008239 | Foxq1    | 0 | 1 | -0.546659  | 1.19261   | 0.767818  | No change |
| NM_008242 | Foxd1    | 0 | 1 | 0.113855   | 0         | 0         | No change |

|           |         |   |   |            |           |           |           |
|-----------|---------|---|---|------------|-----------|-----------|-----------|
| NM_008243 | Mst1    | 0 | 1 | 0.528892   | 0.426816  | 0.596688  | No change |
| NM_008245 | Hhex    | 0 | 1 | -0.586585  | 0.472228  | 0.283759  | No change |
| NM_008250 | Hlx     | 0 | 1 | 1.33625    | 0.0649212 | 0.200627  | No change |
| NM_008257 | Hmx3    | 0 | 1 | 0.113855   | 0         | 0         | No change |
| NM_008259 | Foxa1   | 0 | 1 | -0.471108  | 0.0437358 | 0.0225262 | No change |
| NM_008261 | Hnf4a   | 0 | 1 | 0.229332   | 0.367815  | 0.411834  | No change |
| NM_008262 | Onecut1 | 0 | 1 | -0.886145  | 0.0382298 | 0         | No change |
| NM_008264 | Hoxa13  | 0 | 1 | 0.113855   | 0         | 0         | No change |
| NM_008266 | Hoxb1   | 0 | 1 | 1.11385    | 0.301992  | 0.65673   | No change |
| NM_008267 | Hoxb13  | 0 | 1 | 0.113855   | 0         | 0         | No change |
| NM_008272 | Hoxc9   | 0 | 1 | -0.793036  | 0.567598  | 0.292343  | No change |
| NM_008273 | Hoxd11  | 0 | 1 | 0.113855   | 0         | 0         | No change |
| NM_008274 | Hoxd12  | 0 | 1 | 0.113855   | 0         | 0         | No change |
| NM_008275 | Hoxd13  | 0 | 1 | -0.886145  | 0.0280793 | 0         | No change |
| NM_008277 | Hpd     | 0 | 1 | -2.6935    | 0.306792  | 0         | No change |
| NM_008285 | Hrh1    | 0 | 1 | -1.34558   | 0.184275  | 0.0569468 | No change |
| NM_008290 | Hsd17b2 | 0 | 1 | -2.88615   | 0.381133  | 0         | No change |
| NM_008295 | Hsd3b5  | 0 | 1 | -2.20807   | 0.173473  | 0         | No change |
| NM_008296 | Hsf1    | 0 | 1 | -0.109978  | 5.73292   | 5.05169   | No change |
| NM_008304 | Sdc2    | 0 | 1 | 0.255469   | 4.67004   | 5.30902   | No change |
| NM_008308 | Htr1a   | 0 | 1 | -1.20807   | 0.376634  | 0.145489  | No change |
| NM_008309 | Htr1d   | 0 | 1 | 0.113855   | 0         | 0         | No change |
| NM_008310 | Htr1f   | 0 | 1 | -1.20807   | 0.111109  | 0.0286134 | No change |
| NM_008311 | Htr2b   | 0 | 1 | 0.0657605  | 2.01814   | 2.00959   | No change |
| NM_008312 | Htr2c   | 0 | 1 | -0.886145  | 0.0146722 | 0         | No change |
| NM_008313 | Htr4    | 0 | 1 | 0.113855   | 0         | 0         | No change |
| NM_008314 | Htr5a   | 0 | 1 | 0.113855   | 0         | 0         | No change |
| NM_008315 | Htr7    | 0 | 1 | -0.301183  | 0.0678387 | 0.0465873 | No change |
| NM_008317 | Hyal1   | 0 | 1 | 0.378752   | 4.10147   | 5.08313   | No change |
| NM_008318 | Ibsp    | 0 | 1 | 0.113855   | 0         | 0         | No change |
| NM_008320 | Irf8    | 0 | 1 | 0.170438   | 1.82429   | 1.9554    | No change |
| NM_008321 | Id3     | 0 | 1 | 0.023657   | 2.34016   | 2.25995   | No change |
| NM_008327 | Ifi202b | 0 | 1 | 1.11385    | 0         | 0.0399727 | No change |
| NM_008329 | Ifi204  | 0 | 1 | 0.236712   | 2.70269   | 3.0343    | No change |
| NM_008330 | Ifi47   | 0 | 1 | 0.151823   | 3.08265   | 3.26128   | No change |
| NM_008333 | Ifna11  | 0 | 1 | 0.113855   | 0         | 0         | No change |
| NM_008334 | Ifna7   | 0 | 1 | 0.113855   | 0         | 0         | No change |
| NM_008336 | Ifnab   | 0 | 1 | -1.47111   | 0.208039  | 0         | No change |
| NM_008337 | Ifnf    | 0 | 1 | 1.11385    | 0         | 0.0594789 | No change |
| NM_008339 | Cd79b   | 0 | 1 | 0.22077    | 0.698093  | 0.779034  | No change |
| NM_008341 | Igfbp1  | 0 | 1 | 0.528892   | 0.0917012 | 0.141693  | No change |
| NM_008342 | Igfbp2  | 0 | 1 | 0.0782309  | 6.52035   | 6.55148   | No change |
| NM_008344 | Igfbp6  | 0 | 1 | 0.273333   | 8.27232   | 9.52386   | No change |
| NM_008348 | Il10ra  | 0 | 1 | -0.418366  | 1.85555   | 1.31538   | No change |
| NM_008352 | Il12b   | 0 | 1 | -1.47111   | 0.0714433 | 0         | No change |
| NM_008353 | Il12rb1 | 0 | 1 | 0.512404   | 0.509593  | 0.699912  | No change |
| NM_008354 | Il12rb2 | 0 | 1 | 0.717926   | 0.567571  | 0.901346  | No change |
| NM_008355 | Il13    | 0 | 1 | -1.88615   | 0.173366  | 0         | No change |
| NM_008357 | Il15    | 0 | 1 | 0.765932   | 1.51263   | 2.48152   | No change |
| NM_008358 | Il15ra  | 0 | 1 | 1.03139    | 0.703969  | 1.45032   | No change |
| NM_008360 | Il18    | 0 | 1 | -0.14918   | 0.885245  | 0.746096  | No change |
| NM_008361 | Il1b    | 0 | 1 | -0.945039  | 1.26046   | 0.595102  | No change |
| NM_008366 | Il2     | 0 | 1 | -0.208073  | 0.295936  | 0.228634  | No change |
| NM_008367 | Il2ra   | 0 | 1 | 1.11385    | 0.0157391 | 0.0486389 | No change |
| NM_008368 | Il2rb   | 0 | 1 | 0.385157   | 0.723814  | 0.905376  | No change |
| NM_008370 | Il5ra   | 0 | 1 | -1.47111   | 0.0392305 | 0         | No change |
| NM_008371 | Il7     | 0 | 1 | 0.628428   | 0.563175  | 0.841187  | No change |
| NM_008372 | Il7r    | 0 | 1 | 0.637417   | 0.325668  | 0.492025  | No change |
| NM_008373 | Il9     | 0 | 1 | 0.113855   | 0         | 0         | No change |
| NM_008375 | Fabp6   | 0 | 1 | 0.113855   | 0         | 0         | No change |
| NM_008376 | Gimap1  | 0 | 1 | 0.113855   | 0.509384  | 0.524718  | No change |
| NM_008382 | Inhbe   | 0 | 1 | 0.113855   | 0.0652861 | 0.0672515 | No change |
| NM_008385 | Inpp5b  | 0 | 1 | 0.0454138  | 4.75556   | 4.67088   | No change |
| NM_008386 | Ins1    | 0 | 1 | 0.113855   | 0         | 0         | No change |
| NM_008391 | Irf2    | 0 | 1 | 0.347345   | 2.04814   | 2.48552   | No change |
| NM_008392 | Irg1    | 0 | 1 | -0.886145  | 0.0269293 | 0         | No change |
| NM_008393 | Irx3    | 0 | 1 | -0.886145  | 0.169569  | 0.0698696 | No change |
| NM_008396 | Itga2   | 0 | 1 | 0.202664   | 1.02441   | 1.12333   | No change |
| NM_008400 | Itgal   | 0 | 1 | -0.973608  | 0.286507  | 0.12912   | No change |
| NM_008404 | Itgb2   | 0 | 1 | -0.168545  | 1.07145   | 0.903031  | No change |
| NM_008406 | Itih1   | 0 | 1 | 0.113855   | 0         | 0         | No change |
| NM_008407 | Itih3   | 0 | 1 | 0.113855   | 0.717464  | 0.739062  | No change |
| NM_008412 | Ivl     | 0 | 1 | 0.113855   | 0         | 0         | No change |
| NM_008417 | Kcna2   | 0 | 1 | -0.127153  | 0.241989  | 0.207729  | No change |
| NM_008418 | Kcna3   | 0 | 1 | -0.0787903 | 0.247892  | 0.218875  | No change |
| NM_008423 | Kcnd1   | 0 | 1 | 0.891462   | 0.712607  | 1.2846    | No change |

|           |         |   |   |            |           |           |           |
|-----------|---------|---|---|------------|-----------|-----------|-----------|
| NM_008424 | Kcne1   | 0 | 1 | -2.47111   | 0.110448  | 0         | No change |
| NM_008426 | Kcnj3   | 0 | 1 | 1.61636    | 0.207543  | 0.684131  | No change |
| NM_008427 | Kcnj4   | 0 | 1 | -0.471108  | 0.0647704 | 0.0333601 | No change |
| NM_008431 | Kcnk4   | 0 | 1 | -0.623111  | 0.160675  | 0.0827562 | No change |
| NM_008435 | Kcns1   | 0 | 1 | -0.0116761 | 0.282678  | 0.264716  | No change |
| NM_008437 | Napsa   | 0 | 1 | 0.168303   | 1.17804   | 1.26205   | No change |
| NM_008438 | Kera    | 0 | 1 | 0.113855   | 0.03574   | 0.0368159 | No change |
| NM_008441 | Kif1b   | 0 | 1 | 0.130177   | 7.79188   | 8.11789   | No change |
| NM_008454 | Klk1b16 | 0 | 1 | -0.886145  | 0.857915  | 0.415878  | No change |
| NM_008459 | Klra10  | 0 | 1 | 1.11385    | 0         | 0.0872308 | No change |
| NM_008461 | Klra14  | 0 | 1 | -1.20807   | 0.350656  | 0.0903031 | No change |
| NM_008463 | Klra5   | 0 | 1 | 0.113855   | 0         | 0         | No change |
| NM_008464 | Klra6   | 0 | 1 | 1.69882    | 0         | 0.128658  | No change |
| NM_008466 | Kpna3   | 0 | 1 | 0.187436   | 8.61336   | 9.33782   | No change |
| NM_008470 | Krt16   | 0 | 1 | 0.113855   | 0.222804  | 0.229511  | No change |
| NM_008473 | Krt1    | 0 | 1 | -0.886145  | 0.028481  | 0         | No change |
| NM_008474 | Krt84   | 0 | 1 | 0.113855   | 0         | 0         | No change |
| NM_008475 | Krt4    | 0 | 1 | 0.113855   | 0         | 0         | No change |
| NM_008476 | Krt6a   | 0 | 1 | -0.564217  | 0.216054  | 0.127176  | No change |
| NM_008478 | L1cam   | 0 | 1 | -0.0667174 | 0.210871  | 0.190067  | No change |
| NM_008479 | Lag3    | 0 | 1 | 0.791927   | 0.139177  | 0.250892  | No change |
| NM_008482 | Lamb1   | 0 | 1 | 0.0083204  | 2.89483   | 2.77075   | No change |
| NM_008484 | Lamb3   | 0 | 1 | 0.339923   | 1.90775   | 2.30156   | No change |
| NM_008486 | Anpep   | 0 | 1 | 0.316672   | 1.05873   | 1.25839   | No change |
| NM_008490 | Lcat    | 0 | 1 | -0.248715  | 0.409356  | 0.31626   | No change |
| NM_008493 | Lep     | 0 | 1 | 0.628428   | 0.128387  | 0.198378  | No change |
| NM_008496 | Lgals7  | 0 | 1 | 1.11385    | 0.233477  | 0.601264  | No change |
| NM_008499 | Lhx5    | 0 | 1 | 0.113855   | 0         | 0         | No change |
| NM_008504 | Gzmm    | 0 | 1 | 0.476425   | 0.325161  | 0.4466    | No change |
| NM_008508 | Lor     | 0 | 1 | 1.33625    | 0.195877  | 0.524611  | No change |
| NM_008509 | Lpl     | 0 | 1 | 0.595388   | 0.895044  | 1.29433   | No change |
| NM_008510 | Xcl1    | 0 | 1 | 0.113855   | 0.694153  | 0.71505   | No change |
| NM_008511 | Lrmp    | 0 | 1 | -0.400718  | 0.572488  | 0.403494  | No change |
| NM_008513 | Lrp5    | 0 | 1 | 0.0776498  | 10.8609   | 10.9102   | No change |
| NM_008518 | Ltb     | 0 | 1 | -1.14918   | 0.700112  | 0.26225   | No change |
| NM_008521 | Ltc4s   | 0 | 1 | 0.467492   | 2.01493   | 2.68606   | No change |
| NM_008522 | Ltf     | 0 | 1 | -0.333604  | 0.355836  | 0.26182   | No change |
| NM_008523 | Ltk     | 0 | 1 | -0.886145  | 0.218375  | 0.0964069 | No change |
| NM_008524 | Lum     | 0 | 1 | 0.292825   | 3.52663   | 4.11717   | No change |
| NM_008530 | Ly6f    | 0 | 1 | -0.442539  | 5.88059   | 4.09299   | No change |
| NM_008533 | Cd180   | 0 | 1 | 0.94393    | 0.509364  | 0.956801  | No change |
| NM_008534 | Ly9     | 0 | 1 | -0.507634  | 1.10985   | 0.73286   | No change |
| NM_008535 | Lyl1    | 0 | 1 | -0.371572  | 1.04481   | 0.757373  | No change |
| NM_008537 | Amacr   | 0 | 1 | 0.374091   | 2.30054   | 2.84376   | No change |
| NM_008538 | Marcks  | 0 | 1 | 0.0786654  | 6.89271   | 6.9287    | No change |
| NM_008553 | Ascl1   | 0 | 1 | 0.113855   | 0         | 0         | No change |
| NM_008554 | Ascl2   | 0 | 1 | 0.94393    | 0.345871  | 0.66803   | No change |
| NM_008555 | Masp1   | 0 | 1 | 1.69882    | 0         | 0.0521737 | No change |
| NM_008559 | Mc1r    | 0 | 1 | -0.886145  | 0.0190106 | 0         | No change |
| NM_008560 | Mc2r    | 0 | 1 | -0.886145  | 0.0443904 | 0         | No change |
| NM_008561 | Mc3r    | 0 | 1 | -0.886145  | 0.0265699 | 0         | No change |
| NM_008564 | Mcm2    | 0 | 1 | 0.233649   | 4.75508   | 5.32416   | No change |
| NM_008565 | Mcm4    | 0 | 1 | 0.179852   | 4.54393   | 4.90075   | No change |
| NM_008569 | Anapc1  | 0 | 1 | 0.0795988  | 15.5599   | 15.652    | No change |
| NM_008570 | Mcpt1   | 0 | 1 | 0.113855   | 0         | 0         | No change |
| NM_008571 | Mcpt2   | 0 | 1 | 0.113855   | 0         | 0         | No change |
| NM_008572 | Mcpt8   | 0 | 1 | 0.113855   | 0         | 0         | No change |
| NM_008584 | Meox2   | 0 | 1 | 0.113855   | 0.0593637 | 0.0611507 | No change |
| NM_008585 | Mep1a   | 0 | 1 | 0.274319   | 0.381487  | 0.442093  | No change |
| NM_008586 | Mep1b   | 0 | 1 | 0.113855   | 0         | 0         | No change |
| NM_008589 | Mesp2   | 0 | 1 | -0.507634  | 0.68397   | 0.444985  | No change |
| NM_008592 | Foxc1   | 0 | 1 | 0.251358   | 0.50654   | 0.575767  | No change |
| NM_008593 | Foxd2   | 0 | 1 | 0.113855   | 0         | 0         | No change |
| NM_008595 | Mfng    | 0 | 1 | 0.628428   | 0.494007  | 0.743745  | No change |
| NM_008596 | Sypl2   | 0 | 1 | 0.497183   | 0.472203  | 0.641188  | No change |
| NM_008598 | Mgmt    | 0 | 1 | 0.461778   | 2.72305   | 3.59393   | No change |
| NM_008600 | Mip     | 0 | 1 | 0.113855   | 0.130085  | 0.134001  | No change |
| NM_008605 | Mmp12   | 0 | 1 | 1.69882    | 0.0193216 | 0.0995162 | No change |
| NM_008606 | Mmp11   | 0 | 1 | -0.208073  | 1.67486   | 1.37384   | No change |
| NM_008607 | Mmp13   | 0 | 1 | 1.69882    | 0         | 0.0536755 | No change |
| NM_008610 | Mmp2    | 0 | 1 | -0.0116761 | 1.62716   | 1.5345    | No change |
| NM_008611 | Mmp8    | 0 | 1 | 0.113855   | 0.0852339 | 0.0877998 | No change |
| NM_008612 | Mnat1   | 0 | 1 | 0.219983   | 3.6168    | 4.01227   | No change |
| NM_008620 | Gbp4    | 0 | 1 | -0.203486  | 2.42952   | 2.00533   | No change |
| NM_008621 | Mpp1    | 0 | 1 | 0.311794   | 2.8637    | 3.38802   | No change |
| NM_008623 | Mpz     | 0 | 1 | -1.6935    | 0.209813  | 0.0360216 | No change |

|           |           |   |   |            |           |           |           |
|-----------|-----------|---|---|------------|-----------|-----------|-----------|
| NM_008626 | Mrc2      | 0 | 1 | 0.229332   | 0.564656  | 0.631157  | No change |
| NM_008627 | Meis3     | 0 | 1 | 0.814295   | 0.274073  | 0.483984  | No change |
| NM_008631 | Mt4       | 0 | 1 | 0.113855   | 0         | 0         | No change |
| NM_008637 | Nudt1     | 0 | 1 | 0.561314   | 4.0079    | 5.65765   | No change |
| NM_008644 | Prol1     | 0 | 1 | -0.886145  | 0.179313  | 0.0615703 | No change |
| NM_008645 | Mug1      | 0 | 1 | 0.698817   | 0.0149652 | 0.0308314 | No change |
| NM_008646 | Mug2      | 0 | 1 | -2.20807   | 0.0613494 | 0         | No change |
| NM_008649 | Mup5      | 0 | 1 | 0.113855   | 0         | 0         | No change |
| NM_008653 | Mybpc3    | 0 | 1 | 2.11385    | 0         | 0.0518971 | No change |
| NM_008655 | Gadd45b   | 0 | 1 | -0.319105  | 1.43129   | 1.07743   | No change |
| NM_008656 | Myf5      | 0 | 1 | 0.113855   | 0         | 0         | No change |
| NM_008670 | Naip1     | 0 | 1 | -0.0690092 | 0.533     | 0.482088  | No change |
| NM_008671 | Nap1l2    | 0 | 1 | 1.11385    | 0.0802298 | 0.192838  | No change |
| NM_008673 | Nat1      | 0 | 1 | -0.471108  | 0.103556  | 0.0533365 | No change |
| NM_008674 | Nat3      | 0 | 1 | -3.05607   | 0.399673  | 0         | No change |
| NM_008677 | Ncf4      | 0 | 1 | 1.11385    | 0.239659  | 0.543123  | No change |
| NM_008682 | Nedd1     | 0 | 1 | -0.0159406 | 12.1317   | 11.4199   | No change |
| NM_008688 | Nfic      | 0 | 1 | -0.208073  | 2.92279   | 2.40634   | No change |
| NM_008690 | Nfkbie    | 0 | 1 | 0.396255   | 2.10144   | 2.63916   | No change |
| NM_008691 | Nefm      | 0 | 1 | 0.113855   | 0.0215768 | 0.0222263 | No change |
| NM_008694 | Ngp       | 0 | 1 | -0.886145  | 0.0600284 | 0         | No change |
| NM_008695 | Nid2      | 0 | 1 | -0.0160255 | 2.14045   | 2.01379   | No change |
| NM_008699 | Nkx2-3    | 0 | 1 | 0.113855   | 0         | 0         | No change |
| NM_008700 | Nkx2-5    | 0 | 1 | 0.113855   | 0         | 0         | No change |
| NM_008701 | Nkx2-9    | 0 | 1 | 0.113855   | 0         | 0         | No change |
| NM_008707 | Nmt1      | 0 | 1 | -0.209415  | 20.3619   | 16.7564   | No change |
| NM_008711 | Nog       | 0 | 1 | 0.528892   | 0.0725213 | 0.112057  | No change |
| NM_008718 | Npas1     | 0 | 1 | -1.14918   | 0.36663   | 0.137333  | No change |
| NM_008719 | Npas2     | 0 | 1 | -0.234068  | 0.45017   | 0.360672  | No change |
| NM_008725 | Nppa      | 0 | 1 | 0.376889   | 0.336275  | 0.432997  | No change |
| NM_008726 | Nppb      | 0 | 1 | -0.886145  | 0.0893499 | 0         | No change |
| NM_008729 | Ctnnd2    | 0 | 1 | 0.241234   | 0.750143  | 0.845168  | No change |
| NM_008738 | Nrtn      | 0 | 1 | 0.113855   | 0.34063   | 0.350885  | No change |
| NM_008741 | Nsg2      | 0 | 1 | -0.886145  | 0.0310713 | 0         | No change |
| NM_008746 | Ntrk3     | 0 | 1 | 0.168996   | 1.7786    | 1.90446   | No change |
| NM_008748 | Dusp8     | 0 | 1 | 0.393963   | 0.795416  | 0.998131  | No change |
| NM_008752 | Nxph2     | 0 | 1 | -0.886145  | 0.0270232 | 0         | No change |
| NM_008754 | Obp1a     | 0 | 1 | 0.113855   | 0         | 0         | No change |
| NM_008759 | Sebox     | 0 | 1 | 1.43578    | 0.0541936 | 0.2233    | No change |
| NM_008762 | Olfrl5    | 0 | 1 | 0.113855   | 0         | 0         | No change |
| NM_008763 | Olfrl6    | 0 | 1 | 0.113855   | 0         | 0         | No change |
| NM_008764 | Tnfrsf11b | 0 | 1 | 1.43578    | 0.173119  | 0.484041  | No change |
| NM_008766 | Slc22a6   | 0 | 1 | -1.88615   | 0.0519321 | 0         | No change |
| NM_008768 | Orm1      | 0 | 1 | -1.47111   | 0.181492  | 0         | No change |
| NM_008769 | Otc       | 0 | 1 | 1.69882    | 0         | 0.0633916 | No change |
| NM_008771 | P2rx1     | 0 | 1 | 0.628428   | 0.171306  | 0.264694  | No change |
| NM_008773 | P2ry2     | 0 | 1 | -0.333604  | 0.325234  | 0.239303  | No change |
| NM_008777 | Pah       | 0 | 1 | -0.886145  | 0.0325212 | 0         | No change |
| NM_008779 | Cntn3     | 0 | 1 | 0.3065     | 0.551304  | 0.651008  | No change |
| NM_008791 | Pcp4      | 0 | 1 | 1.21339    | 0.652352  | 1.56798   | No change |
| NM_008798 | Pdcd1     | 0 | 1 | -0.301183  | 0.108331  | 0.0743948 | No change |
| NM_008800 | Pde1b     | 0 | 1 | -1.53      | 0.566226  | 0.170121  | No change |
| NM_008806 | Pde6b     | 0 | 1 | -1.10854   | 0.148493  | 0.0509879 | No change |
| NM_008808 | Pdgfa     | 0 | 1 | 0.191857   | 7.34694   | 7.99249   | No change |
| NM_008814 | Pdx1      | 0 | 1 | 0.113855   | 0         | 0         | No change |
| NM_008817 | Peg3      | 0 | 1 | -0.121773  | 2.29364   | 2.00503   | No change |
| NM_008823 | Cfp       | 0 | 1 | 0.487313   | 1.9664    | 2.63799   | No change |
| NM_008824 | Pfkfb1    | 0 | 1 | -0.284695  | 1.13388   | 0.876008  | No change |
| NM_008829 | Pgr       | 0 | 1 | -0.623111  | 0.091049  | 0.0521055 | No change |
| NM_008830 | Abcb4     | 0 | 1 | -1.76061   | 0.171026  | 0.0352348 | No change |
| NM_008843 | Pip       | 0 | 1 | 0.113855   | 0         | 0         | No change |
| NM_008847 | Pip5k1a   | 0 | 1 | 0.24556    | 7.45629   | 8.41765   | No change |
| NM_008848 | Pira6     | 0 | 1 | -0.371572  | 0.219736  | 0.150901  | No change |
| NM_008849 | Pou1f1    | 0 | 1 | 1.11385    | 0         | 0.0819532 | No change |
| NM_008850 | Pitpna    | 0 | 1 | 0.176061   | 9.77127   | 10.5098   | No change |
| NM_008852 | Pitx3     | 0 | 1 | -0.886145  | 0.0505754 | 0         | No change |
| NM_008855 | Prkcb     | 0 | 1 | -0.100884  | 1.47611   | 1.30913   | No change |
| NM_008865 | Prl3b1    | 0 | 1 | 0.113855   | 0         | 0         | No change |
| NM_008871 | Serpine1  | 0 | 1 | -0.301183  | 0.530423  | 0.403854  | No change |
| NM_008872 | Plat      | 0 | 1 | 0.132591   | 4.18378   | 4.36643   | No change |
| NM_008873 | Plau      | 0 | 1 | -0.278463  | 3.71815   | 2.91086   | No change |
| NM_008877 | Plg       | 0 | 1 | 0.113855   | 0         | 0         | No change |
| NM_008882 | Plxna2    | 0 | 1 | -0.15149   | 2.36204   | 2.02329   | No change |
| NM_008886 | Pms2      | 0 | 1 | 0.25358    | 2.52214   | 2.86453   | No change |
| NM_008887 | Phox2a    | 0 | 1 | 0.654423   | 0.433144  | 0.669276  | No change |
| NM_008888 | Phox2b    | 0 | 1 | 0.113855   | 0         | 0         | No change |

|           |          |   |   |            |           |           |           |
|-----------|----------|---|---|------------|-----------|-----------|-----------|
| NM_008890 | Pnmt     | 0 | 1 | 0.113855   | 0.549381  | 0.56592   | No change |
| NM_008894 | Pold2    | 0 | 1 | -0.0286843 | 12.3802   | 11.549    | No change |
| NM_008899 | Pou3f2   | 0 | 1 | 0.113855   | 0         | 0         | No change |
| NM_008901 | Pou3f4   | 0 | 1 | 0.113855   | 0         | 0         | No change |
| NM_008904 | Ppargc1a | 0 | 1 | 0.376889   | 0.797846  | 0.988459  | No change |
| NM_008913 | Ppp3ca   | 0 | 1 | -0.185927  | 15.8826   | 13.2849   | No change |
| NM_008917 | Ppt1     | 0 | 1 | 0.0944523  | 43.918    | 44.6354   | No change |
| NM_008920 | Prg2     | 0 | 1 | -0.471108  | 0.415829  | 0.257008  | No change |
| NM_008921 | Prim1    | 0 | 1 | -0.564217  | 1.40932   | 0.889777  | No change |
| NM_008928 | Map2k3   | 0 | 1 | 0.0776346  | 7.75439   | 7.78896   | No change |
| NM_008936 | Prop1    | 0 | 1 | 0.113855   | 0         | 0         | No change |
| NM_008940 | Klk8     | 0 | 1 | 1.11385    | 0         | 0.0543048 | No change |
| NM_008941 | Tmprss15 | 0 | 1 | -0.886145  | 0.0187296 | 0         | No change |
| NM_008946 | Psmb6    | 0 | 1 | 0.0687028  | 47.9643   | 47.8837   | No change |
| NM_008950 | Psmc5    | 0 | 1 | 0.0552427  | 23.2492   | 22.9933   | No change |
| NM_008952 | Pipox    | 0 | 1 | 0.291642   | 2.35715   | 2.75185   | No change |
| NM_008953 | Psp      | 0 | 1 | 0.113855   | 0         | 0         | No change |
| NM_008954 | Pspn     | 0 | 1 | 0.85082    | 0.735158  | 1.36312   | No change |
| NM_008955 | Rhox6    | 0 | 1 | 0.113855   | 0         | 0         | No change |
| NM_008959 | Ptdss1   | 0 | 1 | 0.00600986 | 12.1311   | 11.5947   | No change |
| NM_008960 | Pten     | 0 | 1 | 0.0948967  | 19.494    | 19.8186   | No change |
| NM_008962 | Ptgdr    | 0 | 1 | -1.6935    | 0.437358  | 0.112631  | No change |
| NM_008964 | Ptger2   | 0 | 1 | 0.814295   | 0.129472  | 0.228634  | No change |
| NM_008965 | Ptger4   | 0 | 1 | 0.431337   | 1.82651   | 2.35187   | No change |
| NM_008966 | Ptgfr    | 0 | 1 | 0.698817   | 0.0157891 | 0.0325288 | No change |
| NM_008967 | Ptgir    | 0 | 1 | 0.891462   | 0.125422  | 0.236863  | No change |
| NM_008968 | Ptgis    | 0 | 1 | 0.13939    | 4.418     | 4.633     | No change |
| NM_008970 | Pthlh    | 0 | 1 | 0.113855   | 0         | 0         | No change |
| NM_008973 | Ptn      | 0 | 1 | 0.201318   | 0.517266  | 0.56836   | No change |
| NM_008984 | Ptprm    | 0 | 1 | 0.00584762 | 3.80439   | 3.63531   | No change |
| NM_008985 | Ptpn     | 0 | 1 | -1.20807   | 0.177436  | 0.0609259 | No change |
| NM_008987 | Ptx3     | 0 | 1 | 1.43578    | 0.108782  | 0.33617   | No change |
| NM_008988 | Igdcc3   | 0 | 1 | 0.113855   | 0.0886679 | 0.0913371 | No change |
| NM_008989 | Pura     | 0 | 1 | 0.334934   | 6.79082   | 8.16112   | No change |
| NM_008995 | Pex5     | 0 | 1 | -0.0660543 | 12.8184   | 11.6535   | No change |
| NM_008997 | Rab11b   | 0 | 1 | 0.0546156  | 7.98625   | 7.89523   | No change |
| NM_009003 | Rab4a    | 0 | 1 | 0.0156744  | 3.70182   | 3.55904   | No change |
| NM_009006 | Map4k2   | 0 | 1 | 0.286691   | 1.52612   | 1.77585   | No change |
| NM_009008 | Rac2     | 0 | 1 | -0.224314  | 1.51506   | 1.22962   | No change |
| NM_009009 | Rad21    | 0 | 1 | 0.0353344  | 29.9071   | 29.1744   | No change |
| NM_009016 | Raet1a   | 0 | 1 | -0.471108  | 0.36087   | 0.232333  | No change |
| NM_009017 | Raet1b   | 0 | 1 | -0.471108  | 0.448908  | 0.289014  | No change |
| NM_009018 | Raet1c   | 0 | 1 | -1.20807   | 0.225726  | 0.0581303 | No change |
| NM_009020 | Rag2     | 0 | 1 | -2.20807   | 0.184862  | 0.0211586 | No change |
| NM_009030 | Rbbp4    | 0 | 1 | -0.0918292 | 41.1642   | 36.767    | No change |
| NM_009034 | Rbp2     | 0 | 1 | -0.471108  | 0.518549  | 0.320495  | No change |
| NM_009036 | Rbpjl    | 0 | 1 | 0.113855   | 0         | 0         | No change |
| NM_009038 | Rcvrn    | 0 | 1 | 0.113855   | 0         | 0         | No change |
| NM_009040 | Rdh16    | 0 | 1 | 0.52048    | 0.912439  | 1.25321   | No change |
| NM_009042 | Reg1     | 0 | 1 | 0.113855   | 0         | 0         | No change |
| NM_009043 | Reg2     | 0 | 1 | 0.113855   | 0         | 0         | No change |
| NM_009044 | Rel      | 0 | 1 | -0.602352  | 0.593361  | 0.361177  | No change |
| NM_009045 | Rela     | 0 | 1 | -0.115815  | 6.79178   | 5.96271   | No change |
| NM_009046 | Relb     | 0 | 1 | 0.201318   | 2.50261   | 2.74111   | No change |
| NM_009049 | Resp18   | 0 | 1 | -0.886145  | 0.0981591 | 0         | No change |
| NM_009059 | Rgl2     | 0 | 1 | 0.173837   | 5.00177   | 5.37211   | No change |
| NM_009061 | Rgs2     | 0 | 1 | 0.3065     | 4.35436   | 5.12963   | No change |
| NM_009062 | Rgs4     | 0 | 1 | 0.517211   | 0.710911  | 0.976416  | No change |
| NM_009065 | Rit2     | 0 | 1 | 0.113855   | 0         | 0         | No change |
| NM_009066 | Ring1    | 0 | 1 | 0.106242   | 6.47589   | 6.63555   | No change |
| NM_009071 | Rock1    | 0 | 1 | -0.0685293 | 15.5449   | 14.1099   | No change |
| NM_009073 | Rom1     | 0 | 1 | -0.063023  | 2.32919   | 2.11703   | No change |
| NM_009074 | Mst1r    | 0 | 1 | 0.265858   | 0.385044  | 0.442401  | No change |
| NM_009075 | Rpia     | 0 | 1 | 0.167436   | 7.23674   | 7.73819   | No change |
| NM_009085 | Polr1c   | 0 | 1 | 0.0487989  | 30.227    | 29.7616   | No change |
| NM_009086 | Polr1b   | 0 | 1 | 0.366621   | 2.44047   | 2.99877   | No change |
| NM_009089 | Polr2a   | 0 | 1 | -0.0505826 | 11.8138   | 10.8572   | No change |
| NM_009090 | Polr2c   | 0 | 1 | 0.0709993  | 9.00973   | 9.00799   | No change |
| NM_009100 | Rptn     | 0 | 1 | 1.69882    | 0         | 0.0346314 | No change |
| NM_009101 | Rras     | 0 | 1 | 0.376889   | 3.97824   | 4.93278   | No change |
| NM_009102 | Rrh      | 0 | 1 | 2.43578    | 0         | 0.206     | No change |
| NM_009113 | S100a13  | 0 | 1 | -0.301183  | 2.7591    | 2.10531   | No change |
| NM_009114 | S100a9   | 0 | 1 | 1.11385    | 0         | 0.147113  | No change |
| NM_009115 | S100b    | 0 | 1 | 0.372167   | 2.09792   | 2.59329   | No change |
| NM_009116 | Prrx2    | 0 | 1 | -0.886145  | 0.432109  | 0.190764  | No change |
| NM_009117 | Saa1     | 0 | 1 | -2.20807   | 0.459262  | 0         | No change |



|           |           |   |   |             |           |           |           |
|-----------|-----------|---|---|-------------|-----------|-----------|-----------|
| NM_009119 | Sap18     | 0 | 1 | -0.00783984 | 14.4303   | 13.6606   | No change |
| NM_009123 | Nkx1-2    | 0 | 1 | -1.88615    | 0.109868  | 0         | No change |
| NM_009126 | Serpib3a  | 0 | 1 | 0.113855    | 0         | 0         | No change |
| NM_009129 | Scg2      | 0 | 1 | -0.886145   | 0.0280454 | 0         | No change |
| NM_009132 | Scin      | 0 | 1 | 0.564516    | 1.52461   | 2.15612   | No change |
| NM_009133 | Stmn3     | 0 | 1 | 1.11385     | 0.122699  | 0.315981  | No change |
| NM_009135 | Scn7a     | 0 | 1 | 0.297719    | 1.94832   | 2.2811    | No change |
| NM_009136 | Scrg1     | 0 | 1 | 0.113855    | 0         | 0         | No change |
| NM_009138 | Ccl25     | 0 | 1 | -0.709267   | 1.44919   | 0.814264  | No change |
| NM_009139 | Ccl6      | 0 | 1 | 0.300268    | 1.35892   | 1.5998    | No change |
| NM_009140 | Cxcl2     | 0 | 1 | -0.886145   | 0.193055  | 0.066289  | No change |
| NM_009141 | Cxcl5     | 0 | 1 | 1.11385     | 0         | 0.0433782 | No change |
| NM_009144 | Sfrp2     | 0 | 1 | 0.528892    | 0.174145  | 0.251143  | No change |
| NM_009150 | Selenbp1  | 0 | 1 | 0.312539    | 6.1214    | 7.24301   | No change |
| NM_009151 | Selpg     | 0 | 1 | -0.482248   | 1.71288   | 1.15792   | No change |
| NM_009152 | Sema3a    | 0 | 1 | -0.538222   | 0.117407  | 0.072565  | No change |
| NM_009160 | Sftpd     | 0 | 1 | 0.113855    | 0.262794  | 0.270705  | No change |
| NM_009164 | Sh3bp1    | 0 | 1 | -0.426714   | 0.550207  | 0.377847  | No change |
| NM_009167 | Shc3      | 0 | 1 | -1.05607    | 0.362984  | 0.140217  | No change |
| NM_009170 | Shh       | 0 | 1 | 0.361782    | 1.64629   | 2.01887   | No change |
| NM_009172 | Siah1a    | 0 | 1 | -0.106646   | 12.5573   | 11.0971   | No change |
| NM_009173 | Siah1b    | 0 | 1 | -0.432114   | 2.9293    | 2.05357   | No change |
| NM_009184 | Ptk6      | 0 | 1 | -1.47111    | 0.0609737 | 0         | No change |
| NM_009189 | Six1      | 0 | 1 | -1.20807    | 0.22016   | 0.075596  | No change |
| NM_009194 | Slc12a2   | 0 | 1 | 0.108766    | 3.02502   | 3.10507   | No change |
| NM_009195 | Slc12a4   | 0 | 1 | 0.268365    | 2.12036   | 2.43327   | No change |
| NM_009200 | Slc1a6    | 0 | 1 | 0.113855    | 0.0333619 | 0.0343662 | No change |
| NM_009202 | Slc22a1   | 0 | 1 | 1.11385     | 0.0349689 | 0.108065  | No change |
| NM_009204 | Slc2a4    | 0 | 1 | 0.442478    | 2.09918   | 2.72205   | No change |
| NM_009205 | Slc3a1    | 0 | 1 | 0.260076    | 2.23743   | 2.55395   | No change |
| NM_009206 | Slc4a1ap  | 0 | 1 | -0.281117   | 6.81123   | 5.32881   | No change |
| NM_009207 | Slc4a2    | 0 | 1 | -0.0344979  | 5.10681   | 4.74481   | No change |
| NM_009208 | Slc4a3    | 0 | 1 | -0.224947   | 1.33391   | 1.08309   | No change |
| NM_009209 | Slc6a2    | 0 | 1 | 0.654423    | 0.114759  | 0.17732   | No change |
| NM_009211 | Smarcc1   | 0 | 1 | 0.117493    | 4.85258   | 5.01132   | No change |
| NM_009214 | Sms       | 0 | 1 | -0.518413   | 1.25889   | 0.829093  | No change |
| NM_009215 | Sst       | 0 | 1 | 0.113855    | 0         | 0         | No change |
| NM_009218 | Sstr3     | 0 | 1 | -0.886145   | 0.0532278 | 0.0182767 | No change |
| NM_009219 | Sstr4     | 0 | 1 | 0.113855    | 0.100422  | 0.103445  | No change |
| NM_009223 | Snn       | 0 | 1 | 0.00792137  | 8.11164   | 7.76252   | No change |
| NM_009226 | Snrpd1    | 0 | 1 | 0.113855    | 15.7371   | 16.2109   | No change |
| NM_009228 | Snta1     | 0 | 1 | -0.383645   | 2.33957   | 1.69719   | No change |
| NM_009231 | Sos1      | 0 | 1 | 0.16855     | 5.04783   | 5.40103   | No change |
| NM_009234 | Sox11     | 0 | 1 | -2.88615    | 0.057727  | 0         | No change |
| NM_009235 | Sox15     | 0 | 1 | -1.76061    | 1.00134   | 0.206296  | No change |
| NM_009236 | Sox18     | 0 | 1 | -0.326718   | 0.774844  | 0.576456  | No change |
| NM_009237 | Sox3      | 0 | 1 | -0.886145   | 0.0337496 | 0         | No change |
| NM_009244 | Serpina1b | 0 | 1 | -1.6935     | 0.293444  | 0.0503796 | No change |
| NM_009245 | Serpina1c | 0 | 1 | -2.20807    | 0.440475  | 0.050415  | No change |
| NM_009246 | Serpina1d | 0 | 1 | -2.6935     | 0.289984  | 0         | No change |
| NM_009247 | Serpina1e | 0 | 1 | -2.20807    | 0.203038  | 0         | No change |
| NM_009252 | Serpina3n | 0 | 1 | -0.169317   | 3.34259   | 2.82343   | No change |
| NM_009253 | Serpina3m | 0 | 1 | -1.47111    | 0.210045  | 0.0432736 | No change |
| NM_009258 | Spink3    | 0 | 1 | -1.47111    | 0.330298  | 0         | No change |
| NM_009264 | Spr1a     | 0 | 1 | 0.113855    | 0         | 0         | No change |
| NM_009265 | Spr1b     | 0 | 1 | 0.113855    | 0         | 0         | No change |
| NM_009270 | Sqle      | 0 | 1 | 0.0916984   | 21.6079   | 21.9187   | No change |
| NM_009273 | Srp14     | 0 | 1 | 0.0611189   | 122.801   | 121.954   | No change |
| NM_009281 | Zfp143    | 0 | 1 | -0.170448   | 2.82195   | 2.38271   | No change |
| NM_009286 | Sult2a2   | 0 | 1 | 0.698817    | 0.0940525 | 0.193768  | No change |
| NM_009290 | Wnt8a     | 0 | 1 | -1.47111    | 0.0917616 | 0         | No change |
| NM_009297 | Supt6h    | 0 | 1 | -0.102818   | 22.152    | 19.6351   | No change |
| NM_009299 | Sva       | 0 | 1 | 0.891462    | 0.642331  | 1.21306   | No change |
| NM_009300 | Svs4      | 0 | 1 | -1.47111    | 0.24241   | 0         | No change |
| NM_009301 | Svs5      | 0 | 1 | -2.88615    | 0.811731  | 0         | No change |
| NM_009303 | Syng1     | 0 | 1 | 0.85082     | 0.425996  | 0.789876  | No change |
| NM_009308 | Syt4      | 0 | 1 | 0.113855    | 0         | 0         | No change |
| NM_009309 | T         | 0 | 1 | 1.11385     | 0         | 0.0350885 | No change |
| NM_009313 | Tacr1     | 0 | 1 | 1.25136     | 0.0554659 | 0.142839  | No change |
| NM_009322 | Tbr1      | 0 | 1 | -2.47111    | 0.087642  | 0         | No change |
| NM_009323 | Tbx15     | 0 | 1 | -1.47111    | 0.156306  | 0.0402529 | No change |
| NM_009325 | Tbxa2r    | 0 | 1 | -0.523575   | 0.472125  | 0.299285  | No change |
| NM_009327 | Hnf1a     | 0 | 1 | -0.14918    | 0.240622  | 0.202799  | No change |
| NM_009328 | Tcf15     | 0 | 1 | -1.47111    | 0.149716  | 0         | No change |
| NM_009329 | Zfp354a   | 0 | 1 | 0.113855    | 1.21085   | 1.2473    | No change |
| NM_009336 | Vps72     | 0 | 1 | 0.170438    | 6.01805   | 6.44919   | No change |

|           |           |   |   |              |           |           |           |
|-----------|-----------|---|---|--------------|-----------|-----------|-----------|
| NM_009337 | Tcl1      | 0 | 1 | -0.886145    | 0.0500308 | 0         | No change |
| NM_009348 | Tectb     | 0 | 1 | 0.336247     | 0.127877  | 0.158072  | No change |
| NM_009351 | Tep1      | 0 | 1 | 0.0577429    | 3.12478   | 3.09573   | No change |
| NM_009354 | Tert      | 0 | 1 | 0.747727     | 0.569586  | 0.922009  | No change |
| NM_009357 | Tex261    | 0 | 1 | -0.0583915   | 29.7657   | 27.2055   | No change |
| NM_009362 | Tff1      | 0 | 1 | 0.113855     | 0         | 0         | No change |
| NM_009363 | Tff2      | 0 | 1 | 0.113855     | 0         | 0         | No change |
| NM_009364 | Tfpi2     | 0 | 1 | 1.11385      | 0.0462155 | 0.14282   | No change |
| NM_009365 | Tgfb1i1   | 0 | 1 | 0.561314     | 0.737004  | 1.04389   | No change |
| NM_009368 | Tgfb3     | 0 | 1 | 0.0132509    | 3.95304   | 3.79633   | No change |
| NM_009369 | Tgfb1     | 0 | 1 | 0.193289     | 4.11183   | 4.47688   | No change |
| NM_009374 | Tgm3      | 0 | 1 | -0.326718    | 0.305225  | 0.227076  | No change |
| NM_009377 | Th        | 0 | 1 | -2.20807     | 0.158663  | 0         | No change |
| NM_009378 | Thbd      | 0 | 1 | 0.113855     | 4.47999   | 4.61486   | No change |
| NM_009382 | Thy1      | 0 | 1 | -0.130071    | 1.76743   | 1.53099   | No change |
| NM_009387 | Tk1       | 0 | 1 | 0.564516     | 1.47633   | 2.09762   | No change |
| NM_009390 | Tll1      | 0 | 1 | 1.11385      | 0.0989957 | 0.21852   | No change |
| NM_009392 | Tlx2      | 0 | 1 | -0.886145    | 0.0486004 | 0         | No change |
| NM_009393 | Tnnc1     | 0 | 1 | 0.113855     | 0.0991365 | 0.102121  | No change |
| NM_009394 | Tnnc2     | 0 | 1 | -1.88615     | 0.302137  | 0         | No change |
| NM_009398 | Tnfaip6   | 0 | 1 | -0.748642    | 0.827087  | 0.448413  | No change |
| NM_009399 | Tnfrsf11a | 0 | 1 | 0.427963     | 0.499591  | 0.643288  | No change |
| NM_009400 | Tnfrsf18  | 0 | 1 | 0.246305     | 3.52963   | 3.99235   | No change |
| NM_009401 | Tnfrsf8   | 0 | 1 | -0.886145    | 0.309746  | 0.136745  | No change |
| NM_009402 | Pglyrp1   | 0 | 1 | 0.376889     | 0.409356  | 0.5271    | No change |
| NM_009403 | Tnfsf8    | 0 | 1 | 0.376889     | 0.125122  | 0.161111  | No change |
| NM_009404 | Tnfsf9    | 0 | 1 | 0.113855     | 0.0566609 | 0.0583666 | No change |
| NM_009405 | Tnni2     | 0 | 1 | -0.886145    | 0.104487  | 0         | No change |
| NM_009411 | Tpbpa     | 0 | 1 | 0.113855     | 0         | 0         | No change |
| NM_009415 | Tpi1      | 0 | 1 | 0.07077      | 118.317   | 118.291   | No change |
| NM_009417 | Tpo       | 0 | 1 | 0.85082      | 0.106174  | 0.196867  | No change |
| NM_009422 | Traf2     | 0 | 1 | -0.131722    | 7.99679   | 6.94442   | No change |
| NM_009425 | Tnfsf10   | 0 | 1 | -0.000101379 | 1.09952   | 1.0455    | No change |
| NM_009428 | Trpc5     | 0 | 1 | -0.14918     | 0.0838058 | 0.069063  | No change |
| NM_009430 | Prss2     | 0 | 1 | 0.113855     | 0         | 0         | No change |
| NM_009437 | Tst       | 0 | 1 | -0.119818    | 13.5443   | 11.856    | No change |
| NM_009442 | Ttf1      | 0 | 1 | -0.0610194   | 7.33345   | 6.68989   | No change |
| NM_009451 | Tubb4     | 0 | 1 | 0.113855     | 0.062561  | 0.0644443 | No change |
| NM_009452 | Tnfsf4    | 0 | 1 | 0.113855     | 0.0433144 | 0.0446184 | No change |
| NM_009453 | Zrsr2     | 0 | 1 | 0.419481     | 2.181     | 2.78279   | No change |
| NM_009454 | Ube2e3    | 0 | 1 | 0.133395     | 9.91732   | 10.3558   | No change |
| NM_009456 | Ube2l3    | 0 | 1 | 0.0171788    | 25.9378   | 24.9851   | No change |
| NM_009463 | Ucp1      | 0 | 1 | -0.471108    | 0.0847846 | 0.0436685 | No change |
| NM_009464 | Ucp3      | 0 | 1 | -0.564217    | 0.199285  | 0.117306  | No change |
| NM_009467 | Ugt2b5    | 0 | 1 | 0.113855     | 0         | 0         | No change |
| NM_009470 | Umod      | 0 | 1 | -0.127153    | 0.338315  | 0.290417  | No change |
| NM_009474 | Uox       | 0 | 1 | 0.590293     | 1.70167   | 2.45406   | No change |
| NM_009475 | Prap1     | 0 | 1 | -0.886145    | 0.112047  | 0         | No change |
| NM_009476 | Upk2      | 0 | 1 | 1.37689      | 0.318961  | 0.903548  | No change |
| NM_009479 | Uros      | 0 | 1 | 0.177141     | 8.54325   | 9.19686   | No change |
| NM_009482 | Utf1      | 0 | 1 | -0.886145    | 0.0600801 | 0         | No change |
| NM_009486 | Vmn2r89   | 0 | 1 | -2.6935      | 0.154018  | 0         | No change |
| NM_009489 | Vmn2r37   | 0 | 1 | 2.11385      | 0         | 0.0699717 | No change |
| NM_009490 | Vmn2r30   | 0 | 1 | 1.33625      | 0.0544689 | 0.168326  | No change |
| NM_009491 | Vmn2r10   | 0 | 1 | -1.47111     | 0.05479   | 0         | No change |
| NM_009493 | Vmn2r42   | 0 | 1 | -0.886145    | 0.0192575 | 0         | No change |
| NM_009500 | Vav2      | 0 | 1 | 0.161242     | 11.3686   | 12.1026   | No change |
| NM_009501 | Vax1      | 0 | 1 | -0.886145    | 0.068528  | 0         | No change |
| NM_009506 | Vegfc     | 0 | 1 | -0.0381483   | 0.333459  | 0.305331  | No change |
| NM_009508 | Slc32a1   | 0 | 1 | 0.113855     | 0         | 0         | No change |
| NM_009509 | Vil1      | 0 | 1 | -0.770668    | 0.514257  | 0.276385  | No change |
| NM_009511 | Vipr2     | 0 | 1 | 0.92121      | 0.144121  | 0.275711  | No change |
| NM_009512 | Slc27a5   | 0 | 1 | -1.47111     | 0.059848  | 0         | No change |
| NM_009513 | Nrsn1     | 0 | 1 | -0.886145    | 0.163063  | 0.0671886 | No change |
| NM_009514 | Vpreb3    | 0 | 1 | -3.05607     | 0.926152  | 0         | No change |
| NM_009516 | Wee1      | 0 | 1 | -0.240118    | 4.85139   | 3.90556   | No change |
| NM_009518 | Wnt10a    | 0 | 1 | 1.03139      | 0.284316  | 0.58575   | No change |
| NM_009519 | Wnt11     | 0 | 1 | -1.20807     | 0.0999899 | 0.02575   | No change |
| NM_009523 | Wnt4      | 0 | 1 | 0.830062     | 0.822896  | 1.43452   | No change |
| NM_009526 | Wnt6      | 0 | 1 | -0.175652    | 1.44913   | 1.21503   | No change |
| NM_009536 | Ywhae     | 0 | 1 | -0.0525036   | 54.1646   | 49.7147   | No change |
| NM_009538 | Plagl1    | 0 | 1 | 0.101576     | 1.54991   | 1.58292   | No change |
| NM_009541 | Zbtb17    | 0 | 1 | -0.10992     | 3.53056   | 3.11129   | No change |
| NM_009558 | Zfp51     | 0 | 1 | -0.19569     | 7.7526    | 6.43853   | No change |
| NM_009566 | Zfp92     | 0 | 1 | 0.22077      | 0.145471  | 0.162338  | No change |
| NM_009567 | Zfp93     | 0 | 1 | -0.343827    | 4.07039   | 3.04754   | No change |

|           |         |   |   |             |           |           |           |
|-----------|---------|---|---|-------------|-----------|-----------|-----------|
| NM_009573 | Zic1    | 0 | 1 | -0.886145   | 0.0208039 | 0         | No change |
| NM_009574 | Zic2    | 0 | 1 | 0.113855    | 0         | 0         | No change |
| NM_009576 | Zic4    | 0 | 1 | -1.47111    | 0.0340963 | 0         | No change |
| NM_009577 | Zik1    | 0 | 1 | -0.296933   | 1.86247   | 1.4389    | No change |
| NM_009579 | Slc30a1 | 0 | 1 | -0.0395429  | 7.6489    | 7.08301   | No change |
| NM_009580 | Zp1     | 0 | 1 | 0.113855    | 0         | 0         | No change |
| NM_009591 | Aanat   | 0 | 1 | -0.301183   | 0.15453   | 0.106121  | No change |
| NM_009593 | Abcg1   | 0 | 1 | 0.255662    | 2.53952   | 2.88743   | No change |
| NM_009596 | Abpa    | 0 | 1 | 0.113855    | 0         | 0         | No change |
| NM_009597 | Accn2   | 0 | 1 | 0.204053    | 0.55547   | 0.610338  | No change |
| NM_009599 | Ache    | 0 | 1 | -0.623111   | 0.127701  | 0.0657728 | No change |
| NM_009601 | Chrb1   | 0 | 1 | 0.54012     | 2.04312   | 2.83957   | No change |
| NM_009602 | Chrb2   | 0 | 1 | -0.353271   | 1.20383   | 0.893387  | No change |
| NM_009604 | Chrng   | 0 | 1 | -0.471108   | 0.072559  | 0.0373717 | No change |
| NM_009606 | Acta1   | 0 | 1 | 1.26586     | 0.389074  | 0.951869  | No change |
| NM_009608 | Actc1   | 0 | 1 | 1.11385     | 0         | 0.0516482 | No change |
| NM_009616 | Adam19  | 0 | 1 | 0.400736    | 0.534673  | 0.67441   | No change |
| NM_009625 | Adcyap1 | 0 | 1 | 0.113855    | 0         | 0         | No change |
| NM_009630 | Adora2a | 0 | 1 | 1.33625     | 0.0550063 | 0.169987  | No change |
| NM_009633 | Adra2b  | 0 | 1 | -0.400718   | 0.159359  | 0.109437  | No change |
| NM_009634 | Adsl    | 0 | 1 | -0.152319   | 6.04732   | 5.17412   | No change |
| NM_009635 | Avil    | 0 | 1 | 0.403361    | 0.183826  | 0.2367    | No change |
| NM_009636 | Aebp1   | 0 | 1 | 0.237369    | 3.0638    | 3.43973   | No change |
| NM_009637 | Aebp2   | 0 | 1 | 0.30094     | 4.89073   | 5.74643   | No change |
| NM_009640 | Angpt1  | 0 | 1 | 0.528892    | 0.444558  | 0.616458  | No change |
| NM_009641 | Angpt4  | 0 | 1 | 0.730526    | 0.637713  | 1.03229   | No change |
| NM_009645 | Aicda   | 0 | 1 | -0.886145   | 0.0290751 | 0         | No change |
| NM_009646 | Aire    | 0 | 1 | -0.471108   | 0.289032  | 0.186083  | No change |
| NM_009654 | Alb     | 0 | 1 | 0.113855    | 0         | 0         | No change |
| NM_009659 | Alox12b | 0 | 1 | -0.886145   | 0.0296945 | 0         | No change |
| NM_009660 | Alox15  | 0 | 1 | -0.400718   | 0.259833  | 0.178437  | No change |
| NM_009661 | Alox8   | 0 | 1 | 0.698817    | 0.0213193 | 0.0439223 | No change |
| NM_009663 | Alox5ap | 0 | 1 | -0.108538   | 1.63215   | 1.42909   | No change |
| NM_009664 | Ambn    | 0 | 1 | 0.113855    | 0         | 0         | No change |
| NM_009667 | Ampd3   | 0 | 1 | -0.0150429  | 1.97953   | 1.86333   | No change |
| NM_009675 | Aoc3    | 0 | 1 | 0.287884    | 0.602441  | 0.702232  | No change |
| NM_009676 | Aox1    | 0 | 1 | -0.16032    | 1.63815   | 1.39257   | No change |
| NM_009685 | Apbb1   | 0 | 1 | -0.259763   | 5.50985   | 4.37446   | No change |
| NM_009692 | Apoa1   | 0 | 1 | -0.886145   | 0.0707543 | 0         | No change |
| NM_009693 | Apob    | 0 | 1 | -0.0955986  | 0.180383  | 0.160006  | No change |
| NM_009694 | Apobec2 | 0 | 1 | -0.950276   | 1.25882   | 0.589417  | No change |
| NM_009695 | Apoc2   | 0 | 1 | -0.734142   | 0.883587  | 0.455093  | No change |
| NM_009700 | Aqp4    | 0 | 1 | 0.0743264   | 0.493693  | 0.494428  | No change |
| NM_009701 | Aqp5    | 0 | 1 | -0.471108   | 0.0898684 | 0.0462869 | No change |
| NM_009704 | Areg    | 0 | 1 | 0.113855    | 0         | 0         | No change |
| NM_009707 | Arhgap6 | 0 | 1 | 0.421036    | 0.73361   | 0.938103  | No change |
| NM_009708 | Rnd2    | 0 | 1 | -0.886145   | 2.95482   | 1.46941   | No change |
| NM_009711 | Artn    | 0 | 1 | -0.752879   | 0.960399  | 0.527632  | No change |
| NM_009714 | Asgr1   | 0 | 1 | -1.47111    | 0.111957  | 0         | No change |
| NM_009717 | Neurod6 | 0 | 1 | 0.113855    | 0         | 0         | No change |
| NM_009718 | Neurog2 | 0 | 1 | 0.113855    | 0         | 0         | No change |
| NM_009719 | Neurog3 | 0 | 1 | -1.47111    | 0.0905103 | 0         | No change |
| NM_009724 | Atp4b   | 0 | 1 | 1.69882     | 0         | 0.1082    | No change |
| NM_009731 | Akr1b7  | 0 | 1 | -0.00162241 | 1.39609   | 1.32307   | No change |
| NM_009732 | Avp     | 0 | 1 | -0.886145   | 0.137461  | 0         | No change |
| NM_009737 | Bcat2   | 0 | 1 | -0.301183   | 6.03499   | 4.65099   | No change |
| NM_009745 | Bcl7b   | 0 | 1 | -0.237407   | 9.83064   | 7.92889   | No change |
| NM_009747 | Bdkrb2  | 0 | 1 | 1.52889     | 0.0829678 | 0.299129  | No change |
| NM_009751 | Bfsp1   | 0 | 1 | 0.454892    | 0.411341  | 0.544788  | No change |
| NM_009756 | Bmp10   | 0 | 1 | 0.113855    | 0         | 0         | No change |
| NM_009757 | Bmp15   | 0 | 1 | 0.403361    | 0.182025  | 0.234381  | No change |
| NM_009759 | Bmx     | 0 | 1 | 0.760218    | 0.510231  | 0.836168  | No change |
| NM_009763 | Bst1    | 0 | 1 | 0.336247    | 0.149172  | 0.184395  | No change |
| NM_009766 | Brs3    | 0 | 1 | 0.113855    | 0         | 0         | No change |
| NM_009774 | Bub3    | 0 | 1 | -0.125124   | 15.2951   | 13.3451   | No change |
| NM_009779 | C3ar1   | 0 | 1 | 0.288185    | 1.75083   | 2.03733   | No change |
| NM_009782 | Cacna1e | 0 | 1 | -0.426714   | 0.25798   | 0.180933  | No change |
| NM_009786 | Cacybp  | 0 | 1 | -0.107801   | 21.4845   | 18.9745   | No change |
| NM_009788 | Calb1   | 0 | 1 | 0.113855    | 0         | 0         | No change |
| NM_009789 | S100g   | 0 | 1 | 1.11385     | 0.725968  | 1.64521   | No change |
| NM_009790 | Calm1   | 0 | 1 | -0.0155947  | 117.908   | 111.033   | No change |
| NM_009792 | Camk2a  | 0 | 1 | 0.113855    | 0.0163292 | 0.0168208 | No change |
| NM_009802 | Car6    | 0 | 1 | 1.11385     | 0         | 0.0524404 | No change |
| NM_009803 | Nr1i3   | 0 | 1 | 1.92121     | 0.0493227 | 0.304845  | No change |
| NM_009807 | Casp1   | 0 | 1 | -1.01168    | 1.05944   | 0.474494  | No change |
| NM_009808 | Casp12  | 0 | 1 | 0.274319    | 1.79249   | 2.06692   | No change |

|           |         |   |   |            |           |           |           |
|-----------|---------|---|---|------------|-----------|-----------|-----------|
| NM_009809 | Casp14  | 0 | 1 | 1.11385    | 0         | 0.0307984 | No change |
| NM_009810 | Casp3   | 0 | 1 | 0.430712   | 2.67866   | 3.44912   | No change |
| NM_009811 | Casp6   | 0 | 1 | 0.343337   | 4.11931   | 4.98343   | No change |
| NM_009814 | Casq2   | 0 | 1 | 0.130534   | 2.40907   | 2.51079   | No change |
| NM_009823 | Cbfa2t2 | 0 | 1 | -0.0958458 | 6.2617    | 5.576     | No change |
| NM_009827 | Cckar   | 0 | 1 | 0.113855   | 0         | 0         | No change |
| NM_009829 | Ccnd2   | 0 | 1 | 0.304798   | 2.54812   | 2.99803   | No change |
| NM_009833 | Ccnt1   | 0 | 1 | 0.0500582  | 12.5608   | 12.3778   | No change |
| NM_009834 | Ccrn4l  | 0 | 1 | 0.0393079  | 3.1338    | 3.06439   | No change |
| NM_009838 | Cct6a   | 0 | 1 | 0.0220033  | 36.2715   | 35.0566   | No change |
| NM_009843 | Ctla4   | 0 | 1 | -1.88615   | 0.108275  | 0         | No change |
| NM_009848 | Entpd1  | 0 | 1 | 0.085995   | 6.06098   | 6.1237    | No change |
| NM_009850 | Cd3g    | 0 | 1 | 0.461778   | 1.43065   | 1.89478   | No change |
| NM_009854 | Cd7     | 0 | 1 | 0.528892   | 0.5361    | 0.759328  | No change |
| NM_009855 | Cd80    | 0 | 1 | 0.599282   | 0.163983  | 0.25338   | No change |
| NM_009856 | Cd83    | 0 | 1 | 0.0665491  | 0.974726  | 0.970601  | No change |
| NM_009865 | Cdh10   | 0 | 1 | 1.11385    | 0         | 0.021084  | No change |
| NM_009866 | Cdh11   | 0 | 1 | 0.148206   | 2.72755   | 2.87777   | No change |
| NM_009867 | Cdh4    | 0 | 1 | -0.371572  | 0.0659243 | 0.0452726 | No change |
| NM_009868 | Cdh5    | 0 | 1 | 0.274319   | 2.06316   | 2.37742   | No change |
| NM_009869 | Cdh9    | 0 | 1 | -1.47111   | 0.192124  | 0.0494769 | No change |
| NM_009871 | Cdk5r1  | 0 | 1 | -0.608611  | 0.539471  | 0.329954  | No change |
| NM_009872 | Cdk5r2  | 0 | 1 | -1.47111   | 0.051548  | 0         | No change |
| NM_009873 | Cdk6    | 0 | 1 | -0.0357215 | 3.69627   | 3.42969   | No change |
| NM_009880 | Cdx1    | 0 | 1 | 0.113855   | 0         | 0         | No change |
| NM_009885 | Cel     | 0 | 1 | 0.113855   | 0.0683935 | 0.0704524 | No change |
| NM_009887 | Cer1    | 0 | 1 | 0.113855   | 0         | 0         | No change |
| NM_009889 | Cga     | 0 | 1 | 0.113855   | 0         | 0         | No change |
| NM_009890 | Ch25h   | 0 | 1 | -1.01168   | 1.1856    | 0.530998  | No change |
| NM_009891 | Chat    | 0 | 1 | -0.886145  | 0.0248018 | 0         | No change |
| NM_009893 | Chrd    | 0 | 1 | 0.224886   | 0.510727  | 0.569944  | No change |
| NM_009894 | Cideb   | 0 | 1 | -0.705573  | 1.72301   | 0.979246  | No change |
| NM_009895 | Cish    | 0 | 1 | 0.331446   | 1.35451   | 1.62784   | No change |
| NM_009896 | Socs1   | 0 | 1 | -0.538222  | 0.571722  | 0.35336   | No change |
| NM_009897 | Ckmt1   | 0 | 1 | 1.36178    | 0.307017  | 0.813239  | No change |
| NM_009898 | Coro1a  | 0 | 1 | -0.0737722 | 5.32407   | 4.81004   | No change |
| NM_009909 | Cxcr2   | 0 | 1 | 1.11385    | 0         | 0.0235922 | No change |
| NM_009910 | Cxcr3   | 0 | 1 | -0.409707  | 0.95351   | 0.669692  | No change |
| NM_009912 | Ccr1    | 0 | 1 | 0.698817   | 0.467738  | 0.735407  | No change |
| NM_009914 | Ccr3    | 0 | 1 | -0.886145  | 0.0212933 | 0         | No change |
| NM_009915 | Ccr2    | 0 | 1 | -0.100739  | 2.36906   | 2.10032   | No change |
| NM_009917 | Ccr5    | 0 | 1 | -0.320042  | 1.81021   | 1.37399   | No change |
| NM_009921 | Camp    | 0 | 1 | 0.113855   | 0.116349  | 0.119851  | No change |
| NM_009924 | Cnr2    | 0 | 1 | -0.886145  | 0.415269  | 0.204586  | No change |
| NM_009925 | Col10a1 | 0 | 1 | 0.54012    | 1.40277   | 1.9496    | No change |
| NM_009926 | Col11a2 | 0 | 1 | -0.623111  | 0.111907  | 0.0640419 | No change |
| NM_009928 | Col15a1 | 0 | 1 | -0.286683  | 1.28406   | 0.998784  | No change |
| NM_009932 | Col4a2  | 0 | 1 | 0.0867187  | 1.73527   | 1.754     | No change |
| NM_009937 | Colq    | 0 | 1 | -2.6935    | 0.147498  | 0         | No change |
| NM_009942 | Cox5b   | 0 | 1 | 0.0212055  | 51.0755   | 49.3326   | No change |
| NM_009943 | Cox6a2  | 0 | 1 | -2.20807   | 0.9518    | 0.108939  | No change |
| NM_009944 | Cox7a1  | 0 | 1 | -0.564217  | 1.33293   | 0.784601  | No change |
| NM_009945 | Cox7a2  | 0 | 1 | -0.022499  | 185.416   | 173.765   | No change |
| NM_009953 | Crhr2   | 0 | 1 | -1.47111   | 0.0525192 | 0         | No change |
| NM_009962 | Gpr44   | 0 | 1 | -0.964148  | 0.47446   | 0.217219  | No change |
| NM_009964 | Cryab   | 0 | 1 | 0.113855   | 2.17607   | 2.24157   | No change |
| NM_009965 | Cryba1  | 0 | 1 | 0.113855   | 0.408158  | 0.420445  | No change |
| NM_009967 | Crygs   | 0 | 1 | -0.886145  | 0.295309  | 0.1014    | No change |
| NM_009969 | Csf2    | 0 | 1 | 0.113855   | 0.404799  | 0.416985  | No change |
| NM_009970 | Csf2ra  | 0 | 1 | 0.323778   | 3.09076   | 3.68856   | No change |
| NM_009971 | Csf3    | 0 | 1 | -0.471108  | 0.715848  | 0.474042  | No change |
| NM_009972 | Csn2    | 0 | 1 | 0.113855   | 0         | 0         | No change |
| NM_009973 | Csn1s2b | 0 | 1 | -3.20807   | 0.819917  | 0         | No change |
| NM_009977 | Cst7    | 0 | 1 | -0.886145  | 0.494777  | 0.218431  | No change |
| NM_009985 | Ctsw    | 0 | 1 | 0.637417   | 0.848534  | 1.28198   | No change |
| NM_009991 | Cyp11b2 | 0 | 1 | -2.20807   | 0.385992  | 0.0441791 | No change |
| NM_009993 | Cyp1a2  | 0 | 1 | -1.47111   | 0.0736712 | 0         | No change |
| NM_009996 | Cyp24a1 | 0 | 1 | -2.47111   | 0.105724  | 0         | No change |
| NM_009997 | Cyp2a4  | 0 | 1 | -0.886145  | 0.0406373 | 0         | No change |
| NM_009999 | Cyp2b10 | 0 | 1 | -0.623111  | 0.148917  | 0.0766998 | No change |
| NM_010000 | Cyp2b9  | 0 | 1 | 0.113855   | 0         | 0         | No change |
| NM_010001 | Cyp2c37 | 0 | 1 | 0.113855   | 0         | 0         | No change |
| NM_010002 | Cyp2c38 | 0 | 1 | -0.886145  | 0.0242917 | 0         | No change |
| NM_010003 | Cyp2c39 | 0 | 1 | 1.11385    | 0         | 0.0386597 | No change |
| NM_010004 | Cyp2c40 | 0 | 1 | 0.698817   | 0.0386968 | 0.0797235 | No change |
| NM_010005 | Cyp2d10 | 0 | 1 | -2.47111   | 0.211575  | 0         | No change |

|           |          |   |   |              |           |           |           |
|-----------|----------|---|---|--------------|-----------|-----------|-----------|
| NM_010006 | Cyp2d9   | 0 | 1 | 0.113855     | 0.0422126 | 0.0434833 | No change |
| NM_010007 | Cyp2j5   | 0 | 1 | 0.113855     | 0         | 0         | No change |
| NM_010009 | Cyp27b1  | 0 | 1 | 1.43578      | 0.0863605 | 0.266881  | No change |
| NM_010010 | Cyp46a1  | 0 | 1 | -1.07057     | 0.789722  | 0.338956  | No change |
| NM_010011 | Cyp4a10  | 0 | 1 | 0.113855     | 0         | 0         | No change |
| NM_010012 | Cyp8b1   | 0 | 1 | 1.69882      | 0         | 0.0736318 | No change |
| NM_010019 | Dapk2    | 0 | 1 | 0.661343     | 0.472762  | 0.73049   | No change |
| NM_010020 | Slc6a3   | 0 | 1 | 1.11385      | 0         | 0.0207729 | No change |
| NM_010039 | Defa4    | 0 | 1 | 0.113855     | 0         | 0         | No change |
| NM_010045 | Darc     | 0 | 1 | 0.891462     | 0.361103  | 0.681952  | No change |
| NM_010049 | Dhfr     | 0 | 1 | 0.416924     | 1.00126   | 1.27568   | No change |
| NM_010051 | Dkk1     | 0 | 1 | 0.365394     | 0.623093  | 0.770221  | No change |
| NM_010053 | Dlx1     | 0 | 1 | -1.47111     | 0.0501568 | 0         | No change |
| NM_010054 | Dlx2     | 0 | 1 | 0.113855     | 0         | 0         | No change |
| NM_010055 | Dlx3     | 0 | 1 | -0.208073    | 0.107055  | 0.0827085 | No change |
| NM_010057 | Dlx6     | 0 | 1 | -1.47111     | 0.520582  | 0.134063  | No change |
| NM_010061 | Dnase1   | 0 | 1 | -0.000316209 | 4.85981   | 4.62103   | No change |
| NM_010067 | Trdmt1   | 0 | 1 | 0.00492044   | 2.88075   | 2.74967   | No change |
| NM_010071 | Dok2     | 0 | 1 | -0.301183    | 0.771209  | 0.585366  | No change |
| NM_010076 | Drd1a    | 0 | 1 | 0.113855     | 0.0197542 | 0.0203489 | No change |
| NM_010077 | Drd2     | 0 | 1 | -2.88615     | 0.314945  | 0         | No change |
| NM_010078 | Drp2     | 0 | 1 | -0.973608    | 0.329352  | 0.154212  | No change |
| NM_010080 | Dspp     | 0 | 1 | 0.113855     | 0         | 0         | No change |
| NM_010088 | Prl8a2   | 0 | 1 | 0.113855     | 0         | 0         | No change |
| NM_010089 | Usp1715  | 0 | 1 | 0.113855     | 0         | 0         | No change |
| NM_010090 | Dusp2    | 0 | 1 | -0.0560702   | 0.73225   | 0.665553  | No change |
| NM_010094 | Lefty1   | 0 | 1 | -0.301183    | 0.304146  | 0.223787  | No change |
| NM_010101 | S1pr3    | 0 | 1 | 0.20827      | 3.20177   | 3.5223    | No change |
| NM_010102 | S1pr4    | 0 | 1 | 0.528892     | 0.145618  | 0.210003  | No change |
| NM_010104 | Edn1     | 0 | 1 | -0.0612319   | 1.0109    | 0.918826  | No change |
| NM_010108 | Efna3    | 0 | 1 | -0.581291    | 1.87744   | 1.1721    | No change |
| NM_010109 | Efna5    | 0 | 1 | 0.92121      | 0.201891  | 0.374345  | No change |
| NM_010110 | Efnb1    | 0 | 1 | 0.201318     | 3.74348   | 4.09856   | No change |
| NM_010114 | Klk1b22  | 0 | 1 | -0.886145    | 0.0872252 | 0         | No change |
| NM_010124 | Eif4ebp2 | 0 | 1 | 0.25698      | 6.32153   | 7.19518   | No change |
| NM_010130 | Emr1     | 0 | 1 | 0.302616     | 1.97589   | 2.32297   | No change |
| NM_010131 | Emx1     | 0 | 1 | 0.113855     | 0         | 0         | No change |
| NM_010133 | En1      | 0 | 1 | -0.886145    | 0.0272878 | 0         | No change |
| NM_010134 | En2      | 0 | 1 | -1.47111     | 0.0985198 | 0.0202971 | No change |
| NM_010139 | Epha2    | 0 | 1 | -0.574201    | 0.499463  | 0.312374  | No change |
| NM_010140 | Epha3    | 0 | 1 | -0.760614    | 0.560627  | 0.306799  | No change |
| NM_010147 | Epn1     | 0 | 1 | 0.108002     | 13.782    | 14.1393   | No change |
| NM_010148 | Epn2     | 0 | 1 | -0.0291798   | 12.965    | 12.0931   | No change |
| NM_010149 | Epor     | 0 | 1 | -1.24872     | 0.647775  | 0.235509  | No change |
| NM_010151 | Nr2f1    | 0 | 1 | 1.49237      | 0.114721  | 0.354523  | No change |
| NM_010158 | Khdrbs3  | 0 | 1 | 0.16852      | 18.0767   | 19.3415   | No change |
| NM_010168 | F2       | 0 | 1 | -1.47111     | 0.0701136 | 0         | No change |
| NM_010169 | F2r      | 0 | 1 | 0.125827     | 2.51622   | 2.61375   | No change |
| NM_010171 | F3       | 0 | 1 | 0.330347     | 3.86357   | 4.63044   | No change |
| NM_010175 | Fadd     | 0 | 1 | 0.449458     | 2.01481   | 2.62558   | No change |
| NM_010180 | Fbln1    | 0 | 1 | 0.326849     | 0.892169  | 1.06864   | No change |
| NM_010183 | Fbrs     | 0 | 1 | -0.298839    | 5.36504   | 4.14491   | No change |
| NM_010184 | Fcer1a   | 0 | 1 | 1.11385      | 0         | 0.0699717 | No change |
| NM_010185 | Fcer1g   | 0 | 1 | -0.0295094   | 7.73189   | 7.20092   | No change |
| NM_010190 | Fcnb     | 0 | 1 | 0.113855     | 0         | 0         | No change |
| NM_010194 | Fes      | 0 | 1 | 0.113855     | 0.933613  | 0.961718  | No change |
| NM_010198 | Fgf11    | 0 | 1 | 1.33625      | 0.51396   | 1.37652   | No change |
| NM_010200 | Fgf13    | 0 | 1 | -0.108538    | 0.167733  | 0.143985  | No change |
| NM_010202 | Fgf4     | 0 | 1 | 0.113855     | 0         | 0         | No change |
| NM_010203 | Fgf5     | 0 | 1 | 0.113855     | 0         | 0         | No change |
| NM_010204 | Fgf6     | 0 | 1 | 0.113855     | 0         | 0         | No change |
| NM_010210 | Fhit     | 0 | 1 | -0.0737722   | 2.82444   | 2.54578   | No change |
| NM_010213 | Fhl3     | 0 | 1 | 0.201318     | 0.620412  | 0.681695  | No change |
| NM_010216 | Figf     | 0 | 1 | 0.521513     | 1.78319   | 2.44916   | No change |
| NM_010217 | Ctgf     | 0 | 1 | 0.28806      | 5.39671   | 6.27648   | No change |
| NM_010225 | Foxf2    | 0 | 1 | 0.113855     | 0         | 0         | No change |
| NM_010226 | Foxs1    | 0 | 1 | -0.234068    | 1.43532   | 1.14997   | No change |
| NM_010228 | Flt1     | 0 | 1 | 0.300623     | 1.35391   | 1.589     | No change |
| NM_010231 | Fmo1     | 0 | 1 | 0.269506     | 2.33708   | 2.68522   | No change |
| NM_010233 | Fn1      | 0 | 1 | 0.0925862    | 1.71046   | 1.73604   | No change |
| NM_010234 | Fos      | 0 | 1 | 0.22177      | 3.39641   | 3.77306   | No change |
| NM_010235 | Fosl1    | 0 | 1 | -0.208073    | 0.776637  | 0.631592  | No change |
| NM_010243 | Fut9     | 0 | 1 | 0.34832      | 0.191815  | 0.233515  | No change |
| NM_010244 | Fv1      | 0 | 1 | -0.349117    | 5.10072   | 3.79764   | No change |
| NM_010247 | Xrcc6    | 0 | 1 | -0.0352886   | 7.35519   | 6.82915   | No change |
| NM_010252 | Gabrg1   | 0 | 1 | 0.113855     | 0         | 0         | No change |

|           |          |   |   |            |           |           |           |
|-----------|----------|---|---|------------|-----------|-----------|-----------|
| NM_010254 | Galr2    | 0 | 1 | 0.409311   | 0.754408  | 0.962147  | No change |
| NM_010257 | Gast     | 0 | 1 | 0.113855   | 0         | 0         | No change |
| NM_010259 | Gbp1     | 0 | 1 | -1.20807   | 0.0988552 | 0.0254578 | No change |
| NM_010260 | Gbp2     | 0 | 1 | 0.156499   | 2.81043   | 2.98276   | No change |
| NM_010262 | Gbx2     | 0 | 1 | 1.69882    | 0         | 0.0675362 | No change |
| NM_010269 | Gdap2    | 0 | 1 | 0.0500083  | 5.5832    | 5.50122   | No change |
| NM_010272 | Gdf11    | 0 | 1 | -0.0116761 | 0.423314  | 0.396416  | No change |
| NM_010275 | Gdnf     | 0 | 1 | 0.461778   | 0.417085  | 0.552396  | No change |
| NM_010276 | Gem      | 0 | 1 | -0.141402  | 4.53915   | 3.9124    | No change |
| NM_010280 | Gfra3    | 0 | 1 | 0.113855   | 0.0349864 | 0.0360396 | No change |
| NM_010285 | Ghrh     | 0 | 1 | -0.886145  | 0.134803  | 0         | No change |
| NM_010287 | Gpr83    | 0 | 1 | 0.113855   | 0.0309471 | 0.0318788 | No change |
| NM_010289 | Gja10    | 0 | 1 | -2.47111   | 0.229555  | 0         | No change |
| NM_010290 | Gjd2     | 0 | 1 | -1.88615   | 0.072622  | 0         | No change |
| NM_010297 | Glra4    | 0 | 1 | 0.698817   | 0.345748  | 0.559674  | No change |
| NM_010304 | Gna15    | 0 | 1 | -0.371572  | 0.71079   | 0.512531  | No change |
| NM_010307 | Gnal     | 0 | 1 | 0.266934   | 1.77502   | 2.03467   | No change |
| NM_010311 | Gnaz     | 0 | 1 | 0.504645   | 1.25934   | 1.71001   | No change |
| NM_010312 | Gnb2     | 0 | 1 | 0.0625938  | 64.5223   | 64.143    | No change |
| NM_010313 | Gnb5     | 0 | 1 | 0.679452   | 1.41031   | 2.17915   | No change |
| NM_010314 | Gngt1    | 0 | 1 | 0.113855   | 0         | 0         | No change |
| NM_010317 | Gng4     | 0 | 1 | 0.361782   | 1.85503   | 2.2737    | No change |
| NM_010320 | Gng8     | 0 | 1 | 0.961852   | 0.303013  | 0.624269  | No change |
| NM_010323 | Gnrhr    | 0 | 1 | 1.11385    | 0         | 0.0594789 | No change |
| NM_010324 | Got1     | 0 | 1 | 0.3065     | 7.0811    | 8.34129   | No change |
| NM_010326 | Gp1ba    | 0 | 1 | -0.141402  | 0.919365  | 0.789201  | No change |
| NM_010331 | Gpaa1    | 0 | 1 | 0.393315   | 4.44994   | 5.57121   | No change |
| NM_010332 | Ednra    | 0 | 1 | -0.427854  | 2.18089   | 1.53711   | No change |
| NM_010333 | S1pr2    | 0 | 1 | 0.587786   | 0.86652   | 1.24965   | No change |
| NM_010340 | Gpr50    | 0 | 1 | 0.528892   | 0.0773936 | 0.119585  | No change |
| NM_010342 | Npbwr1   | 0 | 1 | 0.113855   | 0.0566302 | 0.058335  | No change |
| NM_010348 | Grik1    | 0 | 1 | -1.10854   | 0.117033  | 0.0401853 | No change |
| NM_010350 | Grin2c   | 0 | 1 | -3.20807   | 0.128138  | 0         | No change |
| NM_010351 | Gsc      | 0 | 1 | -1.88615   | 0.415546  | 0.0611507 | No change |
| NM_010359 | Gstm3    | 0 | 1 | 0.364987   | 8.17529   | 10.034    | No change |
| NM_010361 | Gstt2    | 0 | 1 | 0.194586   | 21.1622   | 23.057    | No change |
| NM_010362 | Gsto1    | 0 | 1 | 0.34832    | 4.0219    | 4.885     | No change |
| NM_010363 | Gstz1    | 0 | 1 | 0.173131   | 19.0225   | 20.4188   | No change |
| NM_010369 | Gypa     | 0 | 1 | -0.886145  | 0.114438  | 0.0392945 | No change |
| NM_010370 | Gzma     | 0 | 1 | -1.05607   | 0.635015  | 0.245299  | No change |
| NM_010371 | Gzmc     | 0 | 1 | 1.11385    | 0         | 0.076864  | No change |
| NM_010372 | Gzmd     | 0 | 1 | 0.113855   | 0         | 0         | No change |
| NM_010373 | Gzme     | 0 | 1 | 0.113855   | 0         | 0         | No change |
| NM_010374 | Gzmf     | 0 | 1 | -0.886145  | 0.0766699 | 0         | No change |
| NM_010375 | Gzmg     | 0 | 1 | 0.113855   | 0         | 0         | No change |
| NM_010378 | H2-Aa    | 0 | 1 | -0.0458368 | 57.1756   | 52.7183   | No change |
| NM_010381 | H2-Ea-ps | 0 | 1 | 0.113855   | 0         | 0         | No change |
| NM_010386 | H2-DMa   | 0 | 1 | 0.376889   | 7.94196   | 9.83564   | No change |
| NM_010389 | H2-Ob    | 0 | 1 | 0.113855   | 0.182716  | 0.188216  | No change |
| NM_010391 | H2-Q10   | 0 | 1 | 0.698817   | 0.0473136 | 0.0974759 | No change |
| NM_010392 | H2-Q2    | 0 | 1 | -0.185705  | 0.951223  | 0.783887  | No change |
| NM_010402 | Hand2    | 0 | 1 | -0.208073  | 0.12473   | 0.0963637 | No change |
| NM_010403 | Hao1     | 0 | 1 | -2.88615   | 0.240439  | 0         | No change |
| NM_010405 | Hba-x    | 0 | 1 | 0.113855   | 0         | 0         | No change |
| NM_010406 | Hc       | 0 | 1 | -1.88615   | 0.0895467 | 0.0131775 | No change |
| NM_010408 | Hcn1     | 0 | 1 | -0.886145  | 0.0969059 | 0.0453741 | No change |
| NM_010410 | Hcrt     | 0 | 1 | -1.47111   | 0.238674  | 0         | No change |
| NM_010414 | Htt      | 0 | 1 | -0.0667174 | 6.09536   | 5.53953   | No change |
| NM_010419 | Hes5     | 0 | 1 | -1.47111   | 0.273735  | 0.0563951 | No change |
| NM_010420 | Hesx1    | 0 | 1 | 0.113855   | 0         | 0         | No change |
| NM_010421 | Hexa     | 0 | 1 | 0.15133    | 17.0028   | 17.9766   | No change |
| NM_010423 | Hey1     | 0 | 1 | -0.793036  | 1.3907    | 0.74884   | No change |
| NM_010425 | Foxd3    | 0 | 1 | -0.886145  | 0.0293691 | 0         | No change |
| NM_010426 | Foxf1a   | 0 | 1 | 1.11385    | 0.0656242 | 0.202799  | No change |
| NM_010427 | Hgf      | 0 | 1 | 0.0497245  | 0.556532  | 0.547227  | No change |
| NM_010442 | Hmox1    | 0 | 1 | 0.137314   | 2.65328   | 2.77871   | No change |
| NM_010444 | Nr4a1    | 0 | 1 | 0.327159   | 5.09468   | 6.0889    | No change |
| NM_010446 | Foxa2    | 0 | 1 | 0.113855   | 0         | 0         | No change |
| NM_010449 | Hoxa1    | 0 | 1 | 1.69882    | 0.0845104 | 0.3192    | No change |
| NM_010450 | Hoxa11   | 0 | 1 | 0.528892   | 0.0621149 | 0.0959772 | No change |
| NM_010451 | Hoxa2    | 0 | 1 | 0.654423   | 0.870643  | 1.32393   | No change |
| NM_010452 | Hoxa3    | 0 | 1 | 0.215734   | 1.09623   | 1.21393   | No change |
| NM_010454 | Hoxa6    | 0 | 1 | 0.872847   | 1.19645   | 2.15681   | No change |
| NM_010455 | Hoxa7    | 0 | 1 | 1.02075    | 0.535825  | 1.06711   | No change |
| NM_010456 | Hoxa9    | 0 | 1 | -0.679694  | 0.766868  | 0.442374  | No change |
| NM_010462 | Hoxc10   | 0 | 1 | 0.113855   | 0         | 0         | No change |

|           |           |   |   |            |           |           |           |
|-----------|-----------|---|---|------------|-----------|-----------|-----------|
| NM_010463 | Hoxc12    | 0 | 1 | 0.113855   | 0         | 0         | No change |
| NM_010464 | Hoxc13    | 0 | 1 | 0.113855   | 0         | 0         | No change |
| NM_010465 | Hoxc6     | 0 | 1 | 0.528892   | 1.53219   | 2.11946   | No change |
| NM_010467 | Hoxd1     | 0 | 1 | 0.92121    | 0.262004  | 0.501226  | No change |
| NM_010473 | Hrc       | 0 | 1 | -0.14918   | 0.143401  | 0.118174  | No change |
| NM_010474 | Hs3st1    | 0 | 1 | 0.535681   | 2.15076   | 2.98241   | No change |
| NM_010475 | Hsd17b1   | 0 | 1 | -0.886145  | 0.370426  | 0.163533  | No change |
| NM_010479 | Hspa1a    | 0 | 1 | 0.00339816 | 12.479    | 11.9053   | No change |
| NM_010482 | Htr1b     | 0 | 1 | 0.113855   | 0.0600284 | 0.0618355 | No change |
| NM_010484 | Slc6a4    | 0 | 1 | -1.47111   | 0.202965  | 0.0522686 | No change |
| NM_010485 | Elavl1    | 0 | 1 | -0.0871579 | 13.4069   | 12.0128   | No change |
| NM_010493 | Icam1     | 0 | 1 | 0.414364   | 2.5802    | 3.27993   | No change |
| NM_010494 | Icam2     | 0 | 1 | 0.22077    | 0.732325  | 0.817235  | No change |
| NM_010501 | Ifit3     | 0 | 1 | 0.264721   | 4.39505   | 5.0304    | No change |
| NM_010502 | Ifna1     | 0 | 1 | 0.113855   | 0         | 0         | No change |
| NM_010503 | Ifna2     | 0 | 1 | 0.113855   | 0         | 0         | No change |
| NM_010504 | Ifna4     | 0 | 1 | 0.113855   | 0         | 0         | No change |
| NM_010505 | Ifna5     | 0 | 1 | 0.113855   | 0         | 0         | No change |
| NM_010507 | Ifna9     | 0 | 1 | 0.113855   | 0         | 0         | No change |
| NM_010510 | Ifnb1     | 0 | 1 | 0.113855   | 0         | 0         | No change |
| NM_010516 | Cyr61     | 0 | 1 | 0.224038   | 2.13065   | 2.37179   | No change |
| NM_010517 | Igfbp4    | 0 | 1 | 0.255211   | 6.84785   | 7.78373   | No change |
| NM_010518 | Igfbp5    | 0 | 1 | 0.245452   | 2.10722   | 2.37913   | No change |
| NM_010531 | Il18bp    | 0 | 1 | 0.0376192  | 6.7108    | 6.55438   | No change |
| NM_010544 | Ilhh      | 0 | 1 | 0.611354   | 0.456255  | 0.675611  | No change |
| NM_010548 | Il10      | 0 | 1 | -2.20807   | 0.213455  | 0         | No change |
| NM_010551 | Il16      | 0 | 1 | -0.341825  | 1.32709   | 0.9929    | No change |
| NM_010552 | Il17a     | 0 | 1 | -0.886145  | 0.0595157 | 0         | No change |
| NM_010553 | Il18rap   | 0 | 1 | 0.336247   | 0.140453  | 0.173618  | No change |
| NM_010554 | Il1a      | 0 | 1 | -0.765851  | 1.58874   | 0.872839  | No change |
| NM_010555 | Il1r2     | 0 | 1 | 0.113855   | 0.0518935 | 0.0534557 | No change |
| NM_010556 | Il3       | 0 | 1 | -1.02365   | 0.820883  | 0.338238  | No change |
| NM_010558 | Il5       | 0 | 1 | 1.11385    | 0.0908643 | 0.233999  | No change |
| NM_010565 | Inhbc     | 0 | 1 | 0.113855   | 0         | 0         | No change |
| NM_010569 | Invs      | 0 | 1 | -0.150073  | 3.98457   | 3.41619   | No change |
| NM_010570 | Irs1      | 0 | 1 | 0.349922   | 1.01919   | 1.23791   | No change |
| NM_010571 | Irs3      | 0 | 1 | 0.599282   | 0.119286  | 0.184316  | No change |
| NM_010574 | Irx2      | 0 | 1 | 0.243915   | 1.47139   | 1.66142   | No change |
| NM_010577 | Irga5     | 0 | 1 | 0.00693961 | 0.430992  | 0.41108   | No change |
| NM_010583 | Irk       | 0 | 1 | 0.376889   | 0.228394  | 0.285685  | No change |
| NM_010584 | Irln1     | 0 | 1 | 0.113855   | 0         | 0         | No change |
| NM_010585 | Irtpr1    | 0 | 1 | 0.160397   | 5.15904   | 5.48883   | No change |
| NM_010593 | Jup       | 0 | 1 | 0.106902   | 11.5622   | 11.8529   | No change |
| NM_010594 | Kap       | 0 | 1 | -2.05607   | 0.917012  | 0.118077  | No change |
| NM_010596 | Kcna7     | 0 | 1 | 0.113855   | 0.259304  | 0.26711   | No change |
| NM_010604 | Kcnj16    | 0 | 1 | 0.0687669  | 1.23146   | 1.22889   | No change |
| NM_010608 | Kcnk3     | 0 | 1 | -1.10854   | 0.237797  | 0.0942139 | No change |
| NM_010609 | Kcnk7     | 0 | 1 | -1.65168   | 0.998287  | 0.257085  | No change |
| NM_010610 | Kcnma1    | 0 | 1 | 0.258535   | 3.25629   | 3.70965   | No change |
| NM_010612 | Kdr       | 0 | 1 | 0.146719   | 2.76366   | 2.91276   | No change |
| NM_010613 | Khsrp     | 0 | 1 | 0.101255   | 10.0034   | 10.2148   | No change |
| NM_010616 | Kif12     | 0 | 1 | -1.79304   | 0.433645  | 0.0957213 | No change |
| NM_010630 | Kifc2     | 0 | 1 | -0.256514  | 1.15305   | 0.913662  | No change |
| NM_010635 | Kif1      | 0 | 1 | 0.3065     | 0.272593  | 0.327599  | No change |
| NM_010636 | Kif12     | 0 | 1 | -0.222194  | 0.924213  | 0.751607  | No change |
| NM_010638 | Kif9      | 0 | 1 | -0.0910616 | 10.7861   | 9.63667   | No change |
| NM_010640 | Klik1b11  | 0 | 1 | -1.88615   | 0.242833  | 0         | No change |
| NM_010645 | Klik1b1   | 0 | 1 | 0.113855   | 0         | 0         | No change |
| NM_010646 | Klra12    | 0 | 1 | 1.11385    | 0         | 0.0828039 | No change |
| NM_010648 | Klra3     | 0 | 1 | -0.886145  | 0.0539419 | 0         | No change |
| NM_010649 | Klra4     | 0 | 1 | 0.113855   | 0         | 0         | No change |
| NM_010651 | Klra9     | 0 | 1 | 0.113855   | 0.233477  | 0.240506  | No change |
| NM_010654 | Klrd1     | 0 | 1 | 0.113855   | 0         | 0         | No change |
| NM_010657 | Hivep3    | 0 | 1 | 0.296719   | 0.278123  | 0.326286  | No change |
| NM_010658 | Mafb      | 0 | 1 | -0.634606  | 0.843143  | 0.508405  | No change |
| NM_010659 | Krt31     | 0 | 1 | -0.886145  | 0.0440816 | 0         | No change |
| NM_010660 | Krt10     | 0 | 1 | 0.265858   | 1.7648    | 2.02373   | No change |
| NM_010661 | Krt12     | 0 | 1 | 1.11385    | 0         | 0.0387222 | No change |
| NM_010662 | Krt13     | 0 | 1 | 0.476425   | 0.318233  | 0.437084  | No change |
| NM_010666 | Krt27     | 0 | 1 | 0.113855   | 0         | 0         | No change |
| NM_010667 | Krt86     | 0 | 1 | 1.69882    | 0         | 0.0732561 | No change |
| NM_010668 | Krt2      | 0 | 1 | 0.113855   | 0         | 0         | No change |
| NM_010669 | Krt6b     | 0 | 1 | 0.113855   | 0         | 0         | No change |
| NM_010670 | Krtap12-1 | 0 | 1 | 0.113855   | 0         | 0         | No change |
| NM_010671 | Krtap13   | 0 | 1 | 0.113855   | 0         | 0         | No change |
| NM_010672 | Krtap6-1  | 0 | 1 | -0.886145  | 0.117328  | 0         | No change |

|           |          |   |   |              |           |           |           |
|-----------|----------|---|---|--------------|-----------|-----------|-----------|
| NM_010673 | Krtap6-2 | 0 | 1 | 0.113855     | 0         | 0         | No change |
| NM_010675 | Krtap8-1 | 0 | 1 | 0.113855     | 0.120368  | 0.123991  | No change |
| NM_010676 | Krtap8-2 | 0 | 1 | 0.113855     | 0         | 0         | No change |
| NM_010678 | Aff3     | 0 | 1 | -0.345577    | 1.39154   | 1.03924   | No change |
| NM_010679 | Lalba    | 0 | 1 | 0.113855     | 0         | 0         | No change |
| NM_010681 | Lama4    | 0 | 1 | 0.237844     | 0.887588  | 0.997427  | No change |
| NM_010687 | Large    | 0 | 1 | 0.0635816    | 2.75429   | 2.73937   | No change |
| NM_010691 | Lbx1     | 0 | 1 | 0.113855     | 0         | 0         | No change |
| NM_010692 | Lbx2     | 0 | 1 | -2.47111     | 0.426517  | 0         | No change |
| NM_010694 | Lcn3     | 0 | 1 | 0.698817     | 0.10189   | 0.209915  | No change |
| NM_010695 | Lcn4     | 0 | 1 | 0.113855     | 0         | 0         | No change |
| NM_010696 | Lcp2     | 0 | 1 | -0.321361    | 1.97755   | 1.50101   | No change |
| NM_010701 | Lect1    | 0 | 1 | -1.05607     | 0.388261  | 0.149981  | No change |
| NM_010702 | Lect2    | 0 | 1 | 0.113855     | 0         | 0         | No change |
| NM_010704 | Lepr     | 0 | 1 | 0.484223     | 0.818232  | 1.09572   | No change |
| NM_010706 | Lgals4   | 0 | 1 | -0.679694    | 2.86409   | 1.67763   | No change |
| NM_010707 | Lgals6   | 0 | 1 | -0.815756    | 3.01668   | 1.59358   | No change |
| NM_010712 | Lhx4     | 0 | 1 | 0.325359     | 0.677727  | 0.814484  | No change |
| NM_010713 | Lhx8     | 0 | 1 | -2.6935      | 0.211511  | 0         | No change |
| NM_010717 | Limk1    | 0 | 1 | -0.383645    | 2.49577   | 1.81476   | No change |
| NM_010721 | Lmnb1    | 0 | 1 | 0.0250455    | 1.61735   | 1.56506   | No change |
| NM_010725 | Lmx1b    | 0 | 1 | 0.113855     | 0         | 0         | No change |
| NM_010728 | Lox      | 0 | 1 | 0.313164     | 0.502779  | 0.597594  | No change |
| NM_010732 | Lrrn2    | 0 | 1 | 0.682139     | 0.583205  | 0.901142  | No change |
| NM_010734 | Lst1     | 0 | 1 | -0.248715    | 1.34025   | 1.03545   | No change |
| NM_010735 | Lta      | 0 | 1 | 0.113855     | 0         | 0         | No change |
| NM_010739 | Muc13    | 0 | 1 | 2.69882      | 0         | 0.120901  | No change |
| NM_010745 | Ly86     | 0 | 1 | 0.60366      | 3.21552   | 4.68045   | No change |
| NM_010746 | Ncr1     | 0 | 1 | 2.92121      | 0         | 0.294426  | No change |
| NM_010748 | Lyst     | 0 | 1 | 0.0113072    | 4.03777   | 3.87353   | No change |
| NM_010750 | Mab2111  | 0 | 1 | 0.28378      | 0.978411  | 1.13708   | No change |
| NM_010753 | Mxd4     | 0 | 1 | -0.0469778   | 40.8463   | 37.6309   | No change |
| NM_010755 | Maff     | 0 | 1 | 0.393963     | 1.04539   | 1.31617   | No change |
| NM_010757 | Mafk     | 0 | 1 | -0.0100578   | 5.97016   | 5.64163   | No change |
| NM_010765 | Mapkapk5 | 0 | 1 | -0.165347    | 10.7317   | 9.10393   | No change |
| NM_010766 | Marco    | 0 | 1 | -1.30118     | 0.245769  | 0.0723335 | No change |
| NM_010767 | Masp2    | 0 | 1 | 0.113855     | 0.0936733 | 0.0964932 | No change |
| NM_010768 | Matk     | 0 | 1 | -1.10854     | 0.522496  | 0.20701   | No change |
| NM_010769 | Matn1    | 0 | 1 | 0.113855     | 0         | 0         | No change |
| NM_010770 | Matn3    | 0 | 1 | -0.886145    | 0.0231231 | 0         | No change |
| NM_010772 | Maz      | 0 | 1 | -0.154634    | 13.9915   | 11.9601   | No change |
| NM_010775 | Mbl1     | 0 | 1 | 0.113855     | 0         | 0         | No change |
| NM_010776 | Mbl2     | 0 | 1 | 0.113855     | 0         | 0         | No change |
| NM_010779 | Mcpt4    | 0 | 1 | -0.301183    | 0.211191  | 0.145032  | No change |
| NM_010780 | Cma1     | 0 | 1 | 0.113855     | 0.0647704 | 0.0667202 | No change |
| NM_010781 | Tpsb2    | 0 | 1 | 0.113855     | 0.064056  | 0.0659843 | No change |
| NM_010782 | Mcpt9    | 0 | 1 | 0.113855     | 0         | 0         | No change |
| NM_010795 | Mgat3    | 0 | 1 | -0.000101379 | 1.16528   | 1.10803   | No change |
| NM_010797 | Mid1     | 0 | 1 | 0.712492     | 0.621769  | 0.979567  | No change |
| NM_010799 | Minpp1   | 0 | 1 | 0.185113     | 8.38231   | 9.07324   | No change |
| NM_010800 | Bhlha15  | 0 | 1 | -0.77923     | 0.239358  | 0.123282  | No change |
| NM_010809 | Mmp3     | 0 | 1 | -0.886145    | 0.0387183 | 0         | No change |
| NM_010814 | Mog      | 0 | 1 | -0.471108    | 0.0816555 | 0.0420568 | No change |
| NM_010815 | Grap2    | 0 | 1 | -0.127153    | 0.286507  | 0.245944  | No change |
| NM_010817 | Psmc7    | 0 | 1 | 0.0291045    | 27.4416   | 26.6524   | No change |
| NM_010820 | Mpdz     | 0 | 1 | -0.18857     | 3.2273    | 2.69395   | No change |
| NM_010821 | Mpeg1    | 0 | 1 | 0.152458     | 9.46705   | 10.017    | No change |
| NM_010827 | Msc      | 0 | 1 | 1.11385      | 0         | 0.0418606 | No change |
| NM_010828 | Cited2   | 0 | 1 | -0.180593    | 2.26529   | 1.89595   | No change |
| NM_010831 | Sik1     | 0 | 1 | 0.227961     | 3.74045   | 4.17149   | No change |
| NM_010833 | Msn      | 0 | 1 | 0.191074     | 5.26327   | 5.72084   | No change |
| NM_010834 | Mstn     | 0 | 1 | -1.88615     | 0.0779563 | 0         | No change |
| NM_010835 | Msx1     | 0 | 1 | 0.85082      | 0.288733  | 0.520494  | No change |
| NM_010836 | Msx3     | 0 | 1 | -2.6935      | 0.182841  | 0         | No change |
| NM_010844 | Muc5ac   | 0 | 1 | -1.47111     | 0.0163887 | 0         | No change |
| NM_010850 | Mycs     | 0 | 1 | -2.47111     | 0.14753   | 0         | No change |
| NM_010855 | Myh4     | 0 | 1 | 0.113855     | 0         | 0         | No change |
| NM_010859 | Myl3     | 0 | 1 | -0.886145    | 0.0776091 | 0         | No change |
| NM_010861 | Myl2     | 0 | 1 | 0.113855     | 0         | 0         | No change |
| NM_010866 | Myod1    | 0 | 1 | 0.113855     | 0         | 0         | No change |
| NM_010870 | Naip5    | 0 | 1 | 0.263602     | 0.829678  | 0.949616  | No change |
| NM_010871 | Naip6    | 0 | 1 | 0.256299     | 1.09139   | 1.24202   | No change |
| NM_010882 | Ndn      | 0 | 1 | 0.476425     | 2.91267   | 3.87002   | No change |
| NM_010883 | Ndp      | 0 | 1 | 0.92121      | 0.108443  | 0.223416  | No change |
| NM_010887 | Ndufs4   | 0 | 1 | 0.0351595    | 36.7546   | 35.8487   | No change |
| NM_010888 | Ndufs6   | 0 | 1 | 0.140007     | 45.0387   | 47.2458   | No change |



|           |              |   |   |            |           |           |           |
|-----------|--------------|---|---|------------|-----------|-----------|-----------|
| NM_010894 | Neurod1      | 0 | 1 | 0.113855   | 0         | 0         | No change |
| NM_010895 | Neurod2      | 0 | 1 | 0.113855   | 0         | 0         | No change |
| NM_010896 | Neurog1      | 0 | 1 | -1.47111   | 0.0837152 | 0         | No change |
| NM_010904 | Nefh         | 0 | 1 | -0.788848  | 0.733242  | 0.395642  | No change |
| NM_010909 | Nfkbil1      | 0 | 1 | -0.165528  | 6.68483   | 5.66514   | No change |
| NM_010910 | Nefl         | 0 | 1 | 0.113855   | 0         | 0         | No change |
| NM_010911 | Nfs1         | 0 | 1 | 0.0728047  | 20.5379   | 20.5617   | No change |
| NM_010915 | Klk1b4       | 0 | 1 | -1.20807   | 0.332267  | 0.0855673 | No change |
| NM_010916 | Nhlh1        | 0 | 1 | -0.886145  | 0.0280229 | 0         | No change |
| NM_010917 | Nid1         | 0 | 1 | -0.0347893 | 4.93361   | 4.58341   | No change |
| NM_010918 | Nktr         | 0 | 1 | 0.0271432  | 35.7555   | 34.6828   | No change |
| NM_010921 | Nkx3-1       | 0 | 1 | -0.383645  | 0.510978  | 0.366164  | No change |
| NM_010922 | Mrpl40       | 0 | 1 | 0.147149   | 16.9113   | 17.8287   | No change |
| NM_010923 | Nnat         | 0 | 1 | 0.783706   | 1.20955   | 2.01727   | No change |
| NM_010924 | Nnmt         | 0 | 1 | -1.60235   | 1.60717   | 0.451516  | No change |
| NM_010927 | Nos2         | 0 | 1 | -0.886145  | 0.0174669 | 0         | No change |
| NM_010929 | Notch4       | 0 | 1 | 0.354863   | 0.802039  | 0.978375  | No change |
| NM_010930 | Nov          | 0 | 1 | 0.698817   | 0.0294685 | 0.0607112 | No change |
| NM_010933 | Nppc         | 0 | 1 | 0.113855   | 0         | 0         | No change |
| NM_010935 | Npy6r        | 0 | 1 | 0.166322   | 0.705889  | 0.755106  | No change |
| NM_010945 | Nsmaf        | 0 | 1 | -0.0146054 | 19.5744   | 18.4442   | No change |
| NM_010946 | Ntan1        | 0 | 1 | 0.240452   | 20.4586   | 23.0131   | No change |
| NM_010948 | Nudc         | 0 | 1 | -0.119942  | 32.8028   | 28.727    | No change |
| NM_010950 | Numb1        | 0 | 1 | 0.113855   | 1.35153   | 1.39221   | No change |
| NM_010951 | Gpr143       | 0 | 1 | 0.113855   | 0         | 0         | No change |
| NM_010953 | Oc90         | 0 | 1 | -1.88615   | 0.271179  | 0.039906  | No change |
| NM_010957 | Ogg1         | 0 | 1 | -0.445573  | 5.01356   | 3.48952   | No change |
| NM_010970 | Olfir23      | 0 | 1 | -2.88615   | 0.498825  | 0         | No change |
| NM_010974 | Olfir242     | 0 | 1 | -1.47111   | 0.152002  | 0         | No change |
| NM_010980 | Olfir32      | 0 | 1 | -1.47111   | 0.150362  | 0         | No change |
| NM_010983 | Olfir2       | 0 | 1 | 0.113855   | 0         | 0         | No change |
| NM_010984 | Olfir263-ps1 | 0 | 1 | 0.113855   | 0         | 0         | No change |
| NM_010990 | Olfir48      | 0 | 1 | 0.113855   | 0         | 0         | No change |
| NM_010991 | Olfir49      | 0 | 1 | 0.113855   | 0.270652  | 0.2788    | No change |
| NM_010997 | Olfir54      | 0 | 1 | 0.113855   | 0         | 0         | No change |
| NM_010998 | Olfir55      | 0 | 1 | -0.886145  | 0.0735158 | 0         | No change |
| NM_010999 | Olfir56      | 0 | 1 | 2.43578    | 0         | 0.14879   | No change |
| NM_011001 | Olfir58      | 0 | 1 | 0.113855   | 0         | 0         | No change |
| NM_011002 | Olfir59      | 0 | 1 | 0.113855   | 0         | 0         | No change |
| NM_011016 | Orm2         | 0 | 1 | -2.88615   | 0.630298  | 0         | No change |
| NM_011021 | Otp          | 0 | 1 | 0.113855   | 0         | 0         | No change |
| NM_011023 | Otx1         | 0 | 1 | -1.47111   | 0.0493401 | 0         | No change |
| NM_011025 | Oxt          | 0 | 1 | 0.113855   | 0         | 0         | No change |
| NM_011036 | Reg3b        | 0 | 1 | 1.11385    | 0         | 0.0945863 | No change |
| NM_011037 | Pax2         | 0 | 1 | 0.353321   | 1.63469   | 1.99222   | No change |
| NM_011039 | Pax7         | 0 | 1 | 0.113855   | 0         | 0         | No change |
| NM_011044 | Pck1         | 0 | 1 | 0.113855   | 0.133205  | 0.137215  | No change |
| NM_011053 | Pdcd11       | 0 | 1 | 0.118129   | 3.87503   | 4.00357   | No change |
| NM_011057 | Pdgfb        | 0 | 1 | 0.395626   | 2.39259   | 3.00146   | No change |
| NM_011059 | Padi1        | 0 | 1 | -0.0236487 | 0.185551  | 0.172023  | No change |
| NM_011061 | Padi4        | 0 | 1 | -1.00162   | 0.316786  | 0.135968  | No change |
| NM_011066 | Per2         | 0 | 1 | 0.183117   | 1.44472   | 1.56201   | No change |
| NM_011068 | Pex11a       | 0 | 1 | -0.0737722 | 6.42222   | 5.79882   | No change |
| NM_011070 | Pfdn2        | 0 | 1 | 0.222108   | 8.51554   | 9.4644    | No change |
| NM_011073 | Prf1         | 0 | 1 | -0.208073  | 0.135721  | 0.104855  | No change |
| NM_011074 | Cdk14        | 0 | 1 | 0.259194   | 3.0653    | 3.4938    | No change |
| NM_011075 | Abcb1b       | 0 | 1 | 0.723908   | 0.288783  | 0.462741  | No change |
| NM_011076 | Abcb1a       | 0 | 1 | 0.3065     | 1.35829   | 1.60112   | No change |
| NM_011079 | Phkg1        | 0 | 1 | 0.113855   | 0.295309  | 0.304199  | No change |
| NM_011081 | Piga         | 0 | 1 | 0.20027    | 6.26519   | 6.85341   | No change |
| NM_011082 | Pigr         | 0 | 1 | -0.208073  | 0.0724271 | 0.0559556 | No change |
| NM_011088 | Pira11       | 0 | 1 | -1.37157   | 0.895626  | 0.307529  | No change |
| NM_011090 | Lilra6       | 0 | 1 | -0.301183  | 0.201258  | 0.148084  | No change |
| NM_011095 | Lilrb3       | 0 | 1 | 0.010019   | 1.81386   | 1.73688   | No change |
| NM_011097 | Pitx1        | 0 | 1 | 0.698817   | 0.0284693 | 0.0586528 | No change |
| NM_011101 | Prkca        | 0 | 1 | 0.262499   | 1.06592   | 1.2181    | No change |
| NM_011102 | Prkcc        | 0 | 1 | -2.20807   | 0.103671  | 0         | No change |
| NM_011107 | Pla2g1b      | 0 | 1 | 0.113855   | 0         | 0         | No change |
| NM_011109 | Pla2g2d      | 0 | 1 | -0.371572  | 0.615662  | 0.443937  | No change |
| NM_011112 | Papola       | 0 | 1 | 0.0383174  | 17.5624   | 17.1674   | No change |
| NM_011113 | Plaur        | 0 | 1 | 1.69882    | 0.0998466 | 0.41141   | No change |
| NM_011118 | Pr12c3       | 0 | 1 | -0.208073  | 0.736193  | 0.589832  | No change |
| NM_011119 | Pa2g4        | 0 | 1 | -0.0621854 | 32.1527   | 29.3127   | No change |
| NM_011120 | Pr17d1       | 0 | 1 | 0.113855   | 0         | 0         | No change |
| NM_011126 | Plunc        | 0 | 1 | -0.886145  | 0.0631277 | 0         | No change |
| NM_011128 | Pnliprp2     | 0 | 1 | -0.886145  | 0.044447  | 0         | No change |

|           |          |   |   |             |           |           |           |
|-----------|----------|---|---|-------------|-----------|-----------|-----------|
| NM_011133 | Pole2    | 0 | 1 | 0.135881    | 2.63147   | 2.75305   | No change |
| NM_011134 | Pon1     | 0 | 1 | 0.113855    | 0         | 0         | No change |
| NM_011136 | Pou2af1  | 0 | 1 | -1.47111    | 0.298762  | 0.0839333 | No change |
| NM_011137 | Pou2f1   | 0 | 1 | -0.307181   | 6.29282   | 4.83468   | No change |
| NM_011139 | Pou2f3   | 0 | 1 | -2.47111    | 0.13817   | 0         | No change |
| NM_011143 | Pou4f1   | 0 | 1 | 0.435783    | 0.0550642 | 0.0756292 | No change |
| NM_011148 | Ppef2    | 0 | 1 | -0.886145   | 0.153239  | 0.0631407 | No change |
| NM_011150 | Lgals3bp | 0 | 1 | 0.162875    | 13.9193   | 14.835    | No change |
| NM_011153 | Gsbs     | 0 | 1 | 0.113855    | 0.0400995 | 0.0413067 | No change |
| NM_011155 | Ppp5c    | 0 | 1 | -0.0971328  | 14.8211   | 13.1854   | No change |
| NM_011165 | Prl4a1   | 0 | 1 | 0.113855    | 0         | 0         | No change |
| NM_011166 | Prl6a1   | 0 | 1 | -1.47111    | 0.160583  | 0         | No change |
| NM_011167 | Prl8a6   | 0 | 1 | 0.113855    | 0         | 0         | No change |
| NM_011168 | Prl7a2   | 0 | 1 | 0.113855    | 0         | 0         | No change |
| NM_011169 | Prlr     | 0 | 1 | 0.0744401   | 4.75056   | 4.7615    | No change |
| NM_011171 | Procr    | 0 | 1 | 0.654423    | 0.463384  | 0.716     | No change |
| NM_011173 | Pros1    | 0 | 1 | 0.118067    | 7.26767   | 7.50841   | No change |
| NM_011174 | Prh1     | 0 | 1 | 0.113855    | 0         | 0         | No change |
| NM_011178 | Prtn3    | 0 | 1 | 0.113855    | 0.215545  | 0.222034  | No change |
| NM_011184 | Psma3    | 0 | 1 | 0.162764    | 14.184    | 15.1165   | No change |
| NM_011187 | Psmb7    | 0 | 1 | 0.12413     | 100.548   | 104.315   | No change |
| NM_011192 | Psme3    | 0 | 1 | -0.202232   | 13.0924   | 10.8276   | No change |
| NM_011195 | Ptcra    | 0 | 1 | -1.6935     | 0.325922  | 0.0559556 | No change |
| NM_011196 | Ptger3   | 0 | 1 | 0.376889    | 0.138143  | 0.177877  | No change |
| NM_011198 | Ptgs2    | 0 | 1 | 0.494945    | 0.706177  | 0.952594  | No change |
| NM_011201 | Ptpn1    | 0 | 1 | -0.0796676  | 7.75836   | 6.98654   | No change |
| NM_011206 | Ptpn18   | 0 | 1 | 0.528892    | 0.487363  | 0.684593  | No change |
| NM_011223 | Pxn      | 0 | 1 | 0.0897759   | 13.7151   | 13.8938   | No change |
| NM_011224 | Pygm     | 0 | 1 | -0.220564   | 0.686147  | 0.555345  | No change |
| NM_011228 | Rab33a   | 0 | 1 | 0.113855    | 0.0716269 | 0.0737831 | No change |
| NM_011232 | Rad1     | 0 | 1 | 0.113855    | 2.60187   | 2.6802    | No change |
| NM_011242 | Rasgrp2  | 0 | 1 | 0.239386    | 0.317797  | 0.360101  | No change |
| NM_011243 | Rarb     | 0 | 1 | 0.113855    | 0.954698  | 0.983438  | No change |
| NM_011246 | Rasgrp1  | 0 | 1 | -0.770668   | 0.313994  | 0.168754  | No change |
| NM_011250 | Rbl2     | 0 | 1 | -0.036439   | 14.6857   | 13.6297   | No change |
| NM_011259 | Reg3a    | 0 | 1 | 0.113855    | 0         | 0         | No change |
| NM_011260 | Reg3g    | 0 | 1 | 0.113855    | 0         | 0         | No change |
| NM_011261 | Reln     | 0 | 1 | 0.113855    | 2.35924   | 2.43026   | No change |
| NM_011264 | Rev3l    | 0 | 1 | -0.00113258 | 16.0297   | 15.2467   | No change |
| NM_011267 | Rgs16    | 0 | 1 | 0.239386    | 0.298471  | 0.338202  | No change |
| NM_011269 | Rhag     | 0 | 1 | 1.11385     | 0         | 0.0309978 | No change |
| NM_011270 | Rhd      | 0 | 1 | 0.3065      | 0.276194  | 0.331927  | No change |
| NM_011271 | Rnase1   | 0 | 1 | 0.113855    | 0.0718484 | 0.0740113 | No change |
| NM_011272 | Rln1     | 0 | 1 | 0.113855    | 0.0999899 | 0.103     | No change |
| NM_011280 | Trim10   | 0 | 1 | -0.6935     | 0.186262  | 0.0959345 | No change |
| NM_011286 | Rph3a    | 0 | 1 | -3.05607    | 0.135031  | 0         | No change |
| NM_011302 | Rs1      | 0 | 1 | -1.60235    | 0.262542  | 0.0737578 | No change |
| NM_011308 | Ncor1    | 0 | 1 | 0.0707715   | 23.8423   | 23.8372   | No change |
| NM_011310 | S100a3   | 0 | 1 | 0.113855    | 0         | 0         | No change |
| NM_011311 | S100a4   | 0 | 1 | -1.16625    | 2.23464   | 0.863218  | No change |
| NM_011312 | S100a5   | 0 | 1 | -0.886145   | 0.161326  | 0         | No change |
| NM_011314 | Saa2     | 0 | 1 | 0.113855    | 0         | 0         | No change |
| NM_011315 | Saa3     | 0 | 1 | -1.47111    | 0.656242  | 0.1352    | No change |
| NM_011316 | Saa4     | 0 | 1 | -1.88615    | 0.102843  | 0         | No change |
| NM_011317 | Khdrbs1  | 0 | 1 | -0.14051    | 18.9293   | 16.3429   | No change |
| NM_011318 | Apcs     | 0 | 1 | 0.113855    | 0         | 0         | No change |
| NM_011321 | Sbp      | 0 | 1 | 0.113855    | 0         | 0         | No change |
| NM_011322 | Scn1b    | 0 | 1 | 0.454892    | 0.644027  | 0.852962  | No change |
| NM_011325 | Scnn1b   | 0 | 1 | 0.113855    | 0.289302  | 0.298012  | No change |
| NM_011326 | Scnn1g   | 0 | 1 | -0.623111   | 0.0940208 | 0.0484256 | No change |
| NM_011328 | Sct      | 0 | 1 | 0.418709    | 2.19938   | 2.83199   | No change |
| NM_011329 | Ccl1     | 0 | 1 | -1.88615    | 0.414017  | 0         | No change |
| NM_011330 | Ccl11    | 0 | 1 | -0.0381483  | 0.584563  | 0.535254  | No change |
| NM_011331 | Ccl12    | 0 | 1 | 0.22077     | 1.56029   | 1.7412    | No change |
| NM_011332 | Ccl17    | 0 | 1 | -0.108538   | 0.813536  | 0.698356  | No change |
| NM_011333 | Ccl2     | 0 | 1 | 0.113855    | 0.172935  | 0.178141  | No change |
| NM_011335 | Ccl21b   | 0 | 1 | 0.292825    | 8.80597   | 10.2805   | No change |
| NM_011337 | Ccl3     | 0 | 1 | 0.698817    | 0.441095  | 0.726997  | No change |
| NM_011338 | Ccl9     | 0 | 1 | 0.413415    | 0.27803   | 0.358     | No change |
| NM_011339 | Cxcl15   | 0 | 1 | 0.113855    | 0.0655317 | 0.0675044 | No change |
| NM_011340 | Serpinf1 | 0 | 1 | 0.150197    | 9.09647   | 9.61057   | No change |
| NM_011347 | Selp     | 0 | 1 | -0.0787903  | 0.30407   | 0.271461  | No change |
| NM_011348 | Sema3e   | 0 | 1 | -0.248715   | 0.172683  | 0.136027  | No change |
| NM_011349 | Sema3f   | 0 | 1 | -0.153249   | 1.43781   | 1.2272    | No change |
| NM_011355 | Sfpi1    | 0 | 1 | -0.54911    | 0.94109   | 0.592424  | No change |
| NM_011359 | Sftpc    | 0 | 1 | -0.886145   | 0.0867907 | 0         | No change |

|           |            |   |   |            |           |           |           |
|-----------|------------|---|---|------------|-----------|-----------|-----------|
| NM_011364 | Sh2d1a     | 0 | 1 | 0.113855   | 0.0850952 | 0.0876569 | No change |
| NM_011371 | St6galnac1 | 0 | 1 | 0.113855   | 0         | 0         | No change |
| NM_011377 | Sim2       | 0 | 1 | 0.113855   | 0         | 0         | No change |
| NM_011380 | Six2       | 0 | 1 | -3.05607   | 0.264489  | 0         | No change |
| NM_011381 | Six3       | 0 | 1 | 0.113855   | 0         | 0         | No change |
| NM_011384 | Six6       | 0 | 1 | -0.886145  | 0.017617  | 0         | No change |
| NM_011390 | Slc12a7    | 0 | 1 | 0.262865   | 2.60839   | 2.98079   | No change |
| NM_011395 | Slc22a3    | 0 | 1 | -0.608611  | 0.637375  | 0.389834  | No change |
| NM_011397 | Slc23a1    | 0 | 1 | 0.180969   | 0.949621  | 1.02593   | No change |
| NM_011402 | Slc34a2    | 0 | 1 | -0.0859306 | 14.9604   | 13.4157   | No change |
| NM_011403 | Slc4a1     | 0 | 1 | -3.20807   | 0.137854  | 0         | No change |
| NM_011407 | Sfn1       | 0 | 1 | 0.528892   | 0.300239  | 0.425256  | No change |
| NM_011408 | Sfn2       | 0 | 1 | -0.154078  | 2.4292    | 2.07089   | No change |
| NM_011410 | Sfn4       | 0 | 1 | -0.623111  | 0.0704325 | 0.0362764 | No change |
| NM_011415 | Snai2      | 0 | 1 | -0.471108  | 1.00502   | 0.678284  | No change |
| NM_011420 | Smn1       | 0 | 1 | 0.0726321  | 3.97596   | 3.97864   | No change |
| NM_011422 | Smr3a      | 0 | 1 | 0.113855   | 0         | 0         | No change |
| NM_011426 | Siglec1    | 0 | 1 | -0.275557  | 1.00388   | 0.786812  | No change |
| NM_011427 | Snai1      | 0 | 1 | 0.435783   | 0.307598  | 0.407389  | No change |
| NM_011428 | Snap25     | 0 | 1 | 0.113855   | 0.0328895 | 0.0338796 | No change |
| NM_011430 | Sncg       | 0 | 1 | 0.113855   | 0.380836  | 0.3923    | No change |
| NM_011435 | Sod3       | 0 | 1 | -0.538222  | 2.21518   | 1.43933   | No change |
| NM_011437 | Sox10      | 0 | 1 | -1.26466   | 0.308262  | 0.105847  | No change |
| NM_011440 | Sox14      | 0 | 1 | -2.88615   | 0.236247  | 0         | No change |
| NM_011441 | Sox17      | 0 | 1 | -0.0512044 | 0.80158   | 0.733965  | No change |
| NM_011443 | Sox2       | 0 | 1 | -0.886145  | 0.0283766 | 0         | No change |
| NM_011446 | Sox7       | 0 | 1 | 0.320306   | 0.256067  | 0.307738  | No change |
| NM_011455 | Serpib9g   | 0 | 1 | 0.113855   | 0         | 0         | No change |
| NM_011456 | Serpib9e   | 0 | 1 | 0.113855   | 0         | 0         | No change |
| NM_011458 | Serpina3k  | 0 | 1 | 0.113855   | 0.042187  | 0.043457  | No change |
| NM_011460 | Serpib9d   | 0 | 1 | -1.47111   | 0.0663426 | 0         | No change |
| NM_011461 | Spic       | 0 | 1 | -1.47111   | 0.110186  | 0         | No change |
| NM_011463 | Spink4     | 0 | 1 | -0.301183  | 1.95069   | 1.46139   | No change |
| NM_011468 | Sprr2a1    | 0 | 1 | 0.113855   | 0.0392968 | 0.0404798 | No change |
| NM_011469 | Sprr2b     | 0 | 1 | 0.113855   | 0         | 0         | No change |
| NM_011470 | Sprr2d     | 0 | 1 | 0.113855   | 0         | 0         | No change |
| NM_011471 | Sprr2e     | 0 | 1 | 0.113855   | 0         | 0         | No change |
| NM_011472 | Sprr2f     | 0 | 1 | 0.113855   | 0         | 0         | No change |
| NM_011474 | Sprr2h     | 0 | 1 | 0.113855   | 0         | 0         | No change |
| NM_011475 | Sprr2i     | 0 | 1 | 0.113855   | 0         | 0         | No change |
| NM_011477 | Sprr2k     | 0 | 1 | 0.113855   | 0         | 0         | No change |
| NM_011494 | Stk16      | 0 | 1 | -0.146381  | 9.92853   | 8.53529   | No change |
| NM_011505 | Stxbp4     | 0 | 1 | 0.026392   | 1.566     | 1.51755   | No change |
| NM_011507 | Suclg2     | 0 | 1 | 0.0224318  | 6.94177   | 6.70973   | No change |
| NM_011510 | Abcc8      | 0 | 1 | -0.127153  | 0.351842  | 0.304445  | No change |
| NM_011514 | Suv39h1    | 0 | 1 | 0.224886   | 5.01002   | 5.57555   | No change |
| NM_011520 | Sdc3       | 0 | 1 | 0.073327   | 5.04615   | 5.05367   | No change |
| NM_011522 | Syngn3     | 0 | 1 | -1.47111   | 0.0711515 | 0         | No change |
| NM_011527 | Tal1       | 0 | 1 | -0.14918   | 0.18424   | 0.15528   | No change |
| NM_011530 | Tap2       | 0 | 1 | 0.194025   | 2.91087   | 3.17149   | No change |
| NM_011536 | Tbx4       | 0 | 1 | -2.47111   | 0.115731  | 0         | No change |
| NM_011538 | Tbx6       | 0 | 1 | 0.476425   | 0.243824  | 0.334885  | No change |
| NM_011539 | Tbxas1     | 0 | 1 | 0.599282   | 0.317106  | 0.471831  | No change |
| NM_011540 | Tcap       | 0 | 1 | 1.11385    | 0.0735158 | 0.227187  | No change |
| NM_011542 | Tcea3      | 0 | 1 | 0.251358   | 2.17965   | 2.47555   | No change |
| NM_011545 | Tcf21      | 0 | 1 | 0.242588   | 4.19632   | 4.73154   | No change |
| NM_011546 | Zeb1       | 0 | 1 | -0.0683485 | 3.13872   | 2.84797   | No change |
| NM_011562 | Tdgf1      | 0 | 1 | -0.471108  | 0.0723331 | 0.0372553 | No change |
| NM_011564 | Sry        | 0 | 1 | -0.886145  | 0.0586641 | 0         | No change |
| NM_011565 | Tead2      | 0 | 1 | 0.0467406  | 4.31668   | 4.24297   | No change |
| NM_011574 | Cirh1a     | 0 | 1 | -0.261903  | 4.83419   | 3.83055   | No change |
| NM_011575 | Tff3       | 0 | 1 | 0.113855   | 0         | 0         | No change |
| NM_011577 | Tgfb1      | 0 | 1 | 0.464352   | 1.29801   | 1.71421   | No change |
| NM_011582 | Thbs4      | 0 | 1 | -2.47111   | 0.108827  | 0         | No change |
| NM_011586 | Myo18a     | 0 | 1 | 0.278486   | 2.59536   | 2.99784   | No change |
| NM_011587 | Tie1       | 0 | 1 | 0.382344   | 1.56311   | 1.9433    | No change |
| NM_011590 | Timm17a    | 0 | 1 | -0.189695  | 29.5644   | 24.661    | No change |
| NM_011600 | Tle4       | 0 | 1 | 0.122267   | 2.60105   | 2.69512   | No change |
| NM_011604 | Tlr6       | 0 | 1 | 0.34518    | 0.589709  | 0.71791   | No change |
| NM_011606 | Clec3b     | 0 | 1 | 0.464352   | 2.73994   | 3.6185    | No change |
| NM_011608 | Tnfrsf17   | 0 | 1 | 1.11385    | 0         | 0.0884125 | No change |
| NM_011611 | Cd40       | 0 | 1 | 0.92121    | 0.12423   | 0.255939  | No change |
| NM_011613 | Tnfsf11    | 0 | 1 | -0.471108  | 0.062365  | 0.0321212 | No change |
| NM_011614 | Tnfsf12    | 0 | 1 | 0.799746   | 0.905103  | 1.52566   | No change |
| NM_011616 | Cd40lg     | 0 | 1 | -0.886145  | 0.0557544 | 0         | No change |
| NM_011617 | Cd70       | 0 | 1 | -0.886145  | 0.0827707 | 0         | No change |

|           |          |   |   |            |           |            |           |
|-----------|----------|---|---|------------|-----------|------------|-----------|
| NM_011618 | Tnnt1    | 0 | 1 | 0.761553   | 2.16391   | 3.53574    | No change |
| NM_011624 | Top3b    | 0 | 1 | -0.170119  | 8.14929   | 6.89038    | No change |
| NM_011629 | Nr2c1    | 0 | 1 | 0.0272671  | 3.73323   | 3.6205     | No change |
| NM_011636 | Plscr1   | 0 | 1 | 0.744621   | 0.976547  | 1.57598    | No change |
| NM_011645 | Prss3    | 0 | 1 | 0.113855   | 0         | 0          | No change |
| NM_011646 | Try4     | 0 | 1 | -2.6935    | 0.523351  | 0          | No change |
| NM_011653 | Tuba1a   | 0 | 1 | 0.0945413  | 98.7791   | 100.399    | No change |
| NM_011656 | Tuft1    | 0 | 1 | 0.142088   | 13.7266   | 14.4198    | No change |
| NM_011658 | Twist1   | 0 | 1 | -0.471108  | 0.47032   | 0.308305   | No change |
| NM_011659 | Tnfrsf4  | 0 | 1 | 0.492366   | 0.543062  | 0.74588    | No change |
| NM_011661 | Tyr      | 0 | 1 | 1.11385    | 0         | 0.0217088  | No change |
| NM_011662 | Tyrobp   | 0 | 1 | -0.217351  | 9.48119   | 7.73719    | No change |
| NM_011669 | Usp12    | 0 | 1 | 0.091487   | 21.1818   | 21.4835    | No change |
| NM_011672 | Ufd1l    | 0 | 1 | -0.166797  | 13.1984   | 11.1859    | No change |
| NM_011673 | Ugcg     | 0 | 1 | -0.0111578 | 4.7224    | 4.45919    | No change |
| NM_011681 | Scgb1a1  | 0 | 1 | 1.11385    | 0         | 0.1534     | No change |
| NM_011683 | Vmn1r51  | 0 | 1 | -0.886145  | 0.0295434 | 0          | No change |
| NM_011684 | Vmn1r45  | 0 | 1 | -0.886145  | 0.0214506 | 0          | No change |
| NM_011698 | Lin7b    | 0 | 1 | 0.361782   | 1.46005   | 1.8048     | No change |
| NM_011703 | Vipr1    | 0 | 1 | -0.0656946 | 1.3222    | 1.20091    | No change |
| NM_011704 | Vnn1     | 0 | 1 | -1.62311   | 0.259618  | 0.0594296  | No change |
| NM_011706 | Trpv2    | 0 | 1 | -0.351809  | 0.709343  | 0.521926   | No change |
| NM_011707 | Vtn      | 0 | 1 | 0.294427   | 0.559141  | 0.658255   | No change |
| NM_011709 | Wap      | 0 | 1 | 0.113855   | 0.248018  | 0.255484   | No change |
| NM_011711 | Fmnl3    | 0 | 1 | -0.0653698 | 6.74958   | 6.13862    | No change |
| NM_011717 | Wiz      | 0 | 1 | -0.107054  | 2.642     | 2.33274    | No change |
| NM_011718 | Wnt10b   | 0 | 1 | 0.336247   | 0.532007  | 0.644733   | No change |
| NM_011719 | Wnt9b    | 0 | 1 | 0.113855   | 0.0616888 | 0.0635459  | No change |
| NM_011720 | Wnt8b    | 0 | 1 | -0.208073  | 0.0825746 | 0.0637953  | No change |
| NM_011722 | Dctn6    | 0 | 1 | 0.0689732  | 40.0518   | 39.9914    | No change |
| NM_011725 | Xlr      | 0 | 1 | -0.564217  | 0.472723  | 0.27826    | No change |
| NM_011731 | Slc6a20b | 0 | 1 | -0.101874  | 0.742091  | 0.655226   | No change |
| NM_011734 | Siae     | 0 | 1 | 0.145448   | 5.48124   | 5.77172    | No change |
| NM_011737 | Ysk4     | 0 | 1 | -0.0667174 | 0.283305  | 0.255354   | No change |
| NM_011739 | Ywhaq    | 0 | 1 | -0.0727853 | 72.3684   | 65.4965    | No change |
| NM_011746 | Mkrm3    | 0 | 1 | 0.0773289  | 1.06715   | 1.07109    | No change |
| NM_011747 | Zfp13    | 0 | 1 | -0.0639933 | 12.6092   | 11.4785    | No change |
| NM_011748 | Zfp14    | 0 | 1 | 0.417636   | 1.25771   | 1.60404    | No change |
| NM_011764 | Zfp90    | 0 | 1 | 0.328449   | 2.7803    | 3.3277     | No change |
| NM_011769 | Zim1     | 0 | 1 | 1.11385    | 0.0398132 | 0.102529   | No change |
| NM_011771 | Ikzf3    | 0 | 1 | -0.940593  | 0.442171  | 0.210222   | No change |
| NM_011772 | Ikzf4    | 0 | 1 | 0.675734   | 0.389346  | 0.6016     | No change |
| NM_011775 | Zp2      | 0 | 1 | 0.113855   | 0         | 0          | No change |
| NM_011776 | Zp3      | 0 | 1 | -0.886145  | 0.0529179 | 0          | No change |
| NM_011779 | Coro1c   | 0 | 1 | 0.219267   | 6.93684   | 7.68891    | No change |
| NM_011782 | Adamts5  | 0 | 1 | 0.231312   | 1.91776   | 2.14381    | No change |
| NM_011784 | Aplnr    | 0 | 1 | 0.45089    | 0.351985  | 0.463298   | No change |
| NM_011786 | Aloxe3   | 0 | 1 | -0.326718  | 0.494276  | 0.367724   | No change |
| NM_011789 | Apc2     | 0 | 1 | -0.163679  | 0.29954   | 0.253175   | No change |
| NM_011795 | C1ql1    | 0 | 1 | 1.11385    | 0         | 0.0576172  | No change |
| NM_011798 | Xcr1     | 0 | 1 | -0.0560702 | 0.125206  | 0.112854   | No change |
| NM_011812 | Fbln5    | 0 | 1 | 0.309579   | 1.38692   | 1.63805    | No change |
| NM_011814 | Fxr2     | 0 | 1 | -0.204321  | 11.24     | 9.28207    | No change |
| NM_011819 | Gdf15    | 0 | 1 | 0.528892   | 0.128585  | 0.198684   | No change |
| NM_011820 | Ggt5     | 0 | 1 | 0.251358   | 0.320079  | 0.364421   | No change |
| NM_011824 | Grem1    | 0 | 1 | 0.354863   | 0.425216  | 0.52562    | No change |
| NM_011826 | Hax1     | 0 | 1 | -0.18499   | 28.9503   | 24.2303    | No change |
| NM_011827 | Hcst     | 0 | 1 | 0.85082    | 0.788382  | 1.46181    | No change |
| NM_011831 | Insl5    | 0 | 1 | -2.47111   | 0.508708  | 0          | No change |
| NM_011832 | Insr     | 0 | 1 | 0.258245   | 0.505417  | 0.576917   | No change |
| NM_011834 | Aadat    | 0 | 1 | -1.20807   | 0.156613  | 0.040332   | No change |
| NM_011835 | Katna1   | 0 | 1 | 0.298966   | 6.55703   | 7.68467    | No change |
| NM_011838 | Lynx1    | 0 | 1 | -0.239782  | 1.60477   | 1.28977    | No change |
| NM_011839 | Mab21l2  | 0 | 1 | 0.587786   | 0.902424  | 1.30143    | No change |
| NM_011841 | Mapk7    | 0 | 1 | 0.0786654  | 1.95312   | 1.96284    | No change |
| NM_011846 | Mmp17    | 0 | 1 | -0.284695  | 0.559301  | 0.432104   | No change |
| NM_011850 | Nr0b2    | 0 | 1 | 0.113855   | 0.124674  | 0.128427   | No change |
| NM_011852 | Oas1g    | 0 | 1 | 0.393963   | 1.43372   | 1.80108    | No change |
| NM_011854 | Oasl2    | 0 | 1 | -0.192807  | 2.06679   | 1.71694    | No change |
| NM_011855 | Odz1     | 0 | 1 | -1.20807   | 0.0333339 | 0.00858436 | No change |
| NM_011859 | Osr1     | 0 | 1 | 0.628428   | 0.450526  | 0.678284   | No change |
| NM_011865 | Pcbp1    | 0 | 1 | 0.0203905  | 22.5907   | 21.8083    | No change |
| NM_011867 | Slc26a4  | 0 | 1 | 0.113855   | 0.0904222 | 0.0931443  | No change |
| NM_011872 | Klk7     | 0 | 1 | -0.886145  | 0.0399386 | 0          | No change |
| NM_011875 | Psmd13   | 0 | 1 | 0.210392   | 12.8417   | 14.1469    | No change |
| NM_011879 | Ik       | 0 | 1 | -0.0851925 | 21.3688   | 19.1706    | No change |

|           |            |   |   |            |           |           |           |
|-----------|------------|---|---|------------|-----------|-----------|-----------|
| NM_011881 | Grk1       | 0 | 1 | 0.791927   | 0.0375248 | 0.0676453 | No change |
| NM_011884 | Rngtt      | 0 | 1 | 0.147486   | 3.54086   | 3.73389   | No change |
| NM_011886 | Scamp3     | 0 | 1 | 0.00888525 | 5.31397   | 5.0864    | No change |
| NM_011887 | Scn11a     | 0 | 1 | -3.20807   | 0.107496  | 0         | No change |
| NM_011888 | Ccl19      | 0 | 1 | -1.07057   | 2.3231    | 0.997097  | No change |
| NM_011891 | Sgcd       | 0 | 1 | 0.590293   | 1.09596   | 1.59079   | No change |
| NM_011892 | Sgcg       | 0 | 1 | -3.05607   | 0.158618  | 0         | No change |
| NM_011899 | Srp54a     | 0 | 1 | 0.0753807  | 40.9757   | 41.098    | No change |
| NM_011904 | Tll2       | 0 | 1 | -1.88615   | 0.144806  | 0.0213093 | No change |
| NM_011905 | Tlr2       | 0 | 1 | 0.698817   | 0.805558  | 1.25728   | No change |
| NM_011907 | Trex2      | 0 | 1 | 0.77682    | 0.75455   | 1.27189   | No change |
| NM_011909 | Usp18      | 0 | 1 | 0.281312   | 2.51855   | 2.91866   | No change |
| NM_011910 | Uts2       | 0 | 1 | 0.113855   | 0         | 0         | No change |
| NM_011911 | Vmn1r49    | 0 | 1 | 0.113855   | 0         | 0         | No change |
| NM_011912 | Vax2       | 0 | 1 | -2.6935    | 0.339138  | 0         | No change |
| NM_011915 | Wif1       | 0 | 1 | 0.528892   | 0.0621703 | 0.0960629 | No change |
| NM_011917 | Xrn2       | 0 | 1 | 0.103538   | 8.69351   | 8.89125   | No change |
| NM_011919 | Ing1       | 0 | 1 | -0.164163  | 13.4034   | 11.3824   | No change |
| NM_011920 | Abcg2      | 0 | 1 | -0.19149   | 4.8122    | 4.006     | No change |
| NM_011923 | Angptl2    | 0 | 1 | 0.305514   | 3.68296   | 4.33581   | No change |
| NM_011924 | Avpr1b     | 0 | 1 | 0.113855   | 0         | 0         | No change |
| NM_011927 | Ceacam9    | 0 | 1 | -0.471108  | 0.101445  | 0.0522496 | No change |
| NM_011929 | Clcn6      | 0 | 1 | 0.0659203  | 3.64032   | 3.62655   | No change |
| NM_011931 | Rfwd2      | 0 | 1 | 0.102336   | 6.91967   | 7.07118   | No change |
| NM_011937 | Gnpda1     | 0 | 1 | -0.0551843 | 12.3023   | 11.2681   | No change |
| NM_011939 | Hsf4       | 0 | 1 | 1.11385    | 0.0884428 | 0.227763  | No change |
| NM_011942 | Lypla2     | 0 | 1 | 0.285466   | 8.26865   | 9.59917   | No change |
| NM_011947 | Map3k3     | 0 | 1 | 0.122986   | 6.94938   | 7.20418   | No change |
| NM_011948 | Map3k4     | 0 | 1 | -0.0598901 | 6.81822   | 6.22504   | No change |
| NM_011954 | Prl2c4     | 0 | 1 | -0.208073  | 0.750283  | 0.601121  | No change |
| NM_011955 | Nubp1      | 0 | 1 | 0.388962   | 3.86455   | 4.8243    | No change |
| NM_011957 | Creb3l1    | 0 | 1 | -0.301183  | 0.583076  | 0.442569  | No change |
| NM_011960 | Parg       | 0 | 1 | -0.11108   | 9.00134   | 7.93135   | No change |
| NM_011962 | Plod3      | 0 | 1 | 0.0675612  | 1.99852   | 1.99298   | No change |
| NM_011966 | Psma4      | 0 | 1 | 0.18292    | 36.2454   | 39.1706   | No change |
| NM_011976 | Sema4g     | 0 | 1 | 0.435783   | 1.3443    | 1.73513   | No change |
| NM_011979 | Vnn3       | 0 | 1 | -0.623111  | 0.346348  | 0.198208  | No change |
| NM_011982 | Homer1     | 0 | 1 | 0.244111   | 4.21976   | 4.76077   | No change |
| NM_011985 | Mmp23      | 0 | 1 | 0.391389   | 1.55521   | 1.95247   | No change |
| NM_011998 | Chst4      | 0 | 1 | 0.113855   | 0         | 0         | No change |
| NM_012002 | Cops6      | 0 | 1 | -0.0667174 | 10.7661   | 9.77775   | No change |
| NM_012007 | Ctsj       | 0 | 1 | 0.113855   | 0         | 0         | No change |
| NM_012009 | Sh2d1b1    | 0 | 1 | -1.88615   | 0.34044   | 0.0500984 | No change |
| NM_012013 | Figla      | 0 | 1 | -1.20807   | 0.367288  | 0.0945863 | No change |
| NM_012014 | Gprin1     | 0 | 1 | -0.208073  | 0.0673199 | 0.0520099 | No change |
| NM_012016 | Ern2       | 0 | 1 | 0.113855   | 0.023442  | 0.0241477 | No change |
| NM_012020 | Foxl2      | 0 | 1 | 0.698817   | 0.0829678 | 0.142442  | No change |
| NM_012028 | St6galnac5 | 0 | 1 | -0.208073  | 0.139456  | 0.10774   | No change |
| NM_012029 | Ecsit      | 0 | 1 | -0.27001   | 14.9831   | 11.8182   | No change |
| NM_012030 | Slc9a3r1   | 0 | 1 | 0.138035   | 12.8363   | 13.4468   | No change |
| NM_012033 | Tinag      | 0 | 1 | -0.14918   | 0.448842  | 0.37829   | No change |
| NM_012038 | Vsnl1      | 0 | 1 | 0.113855   | 0.215991  | 0.222493  | No change |
| NM_012044 | Pla2g2e    | 0 | 1 | 0.113855   | 0         | 0         | No change |
| NM_012045 | Pla2g2f    | 0 | 1 | 0.113855   | 0         | 0         | No change |
| NM_012047 | Brd7       | 0 | 1 | -0.119723  | 19.6434   | 17.2056   | No change |
| NM_012054 | Aoah       | 0 | 1 | 0.421977   | 0.478168  | 0.615703  | No change |
| NM_012057 | Irf5       | 0 | 1 | 0.189804   | 1.20564   | 1.31094   | No change |
| NM_012065 | Pde6g      | 0 | 1 | -0.471108  | 0.155045  | 0.0798565 | No change |
| NM_013459 | Cfd        | 0 | 1 | 0.528892   | 0.377535  | 0.54446   | No change |
| NM_013461 | Adra1a     | 0 | 1 | 0.113855   | 0.859159  | 0.885023  | No change |
| NM_013462 | Adrb3      | 0 | 1 | 0.113855   | 0.0249349 | 0.0256855 | No change |
| NM_013465 | Ahsg       | 0 | 1 | -1.88615   | 0.141845  | 0         | No change |
| NM_013468 | Ankrd1     | 0 | 1 | 2.69882    | 0         | 0.203374  | No change |
| NM_013469 | Anxa11     | 0 | 1 | -0.335276  | 4.5395    | 3.41719   | No change |
| NM_013473 | Anxa8      | 0 | 1 | 0.476425   | 0.223853  | 0.307456  | No change |
| NM_013474 | Apoa2      | 0 | 1 | -2.20807   | 0.535071  | 0         | No change |
| NM_013479 | Bcl2l10    | 0 | 1 | 0.113855   | 0         | 0         | No change |
| NM_013482 | Btk        | 0 | 1 | 1.11385    | 0.192446  | 0.424799  | No change |
| NM_013483 | Btn1a1     | 0 | 1 | -0.886145  | 0.0202126 | 0         | No change |
| NM_013484 | C2         | 0 | 1 | -0.239324  | 9.19926   | 7.41261   | No change |
| NM_013485 | C9         | 0 | 1 | -1.47111   | 0.0788828 | 0         | No change |
| NM_013486 | Cd2        | 0 | 1 | 0.45089    | 1.09657   | 1.44335   | No change |
| NM_013488 | Cd4        | 0 | 1 | -0.471108  | 0.653019  | 0.44072   | No change |
| NM_013489 | Cd84       | 0 | 1 | 0.161161   | 1.24943   | 1.33067   | No change |
| NM_013490 | Chka       | 0 | 1 | -0.20176   | 15.4241   | 12.761    | No change |
| NM_013491 | Clcn1      | 0 | 1 | 0.961852   | 0.078638  | 0.162011  | No change |

|           |           |   |   |            |           |            |           |
|-----------|-----------|---|---|------------|-----------|------------|-----------|
| NM_013500 | Hapln1    | 0 | 1 | 0.113855   | 0.0275739 | 0.0284039  | No change |
| NM_013501 | Cryaa     | 0 | 1 | -2.20807   | 0.237051  | 0          | No change |
| NM_013503 | Drd5      | 0 | 1 | 0.113855   | 0         | 0          | No change |
| NM_013504 | Dsc1      | 0 | 1 | -2.20807   | 0.0738468 | 0          | No change |
| NM_013508 | Elk3      | 0 | 1 | 0.199585   | 2.4032    | 2.62815    | No change |
| NM_013512 | Epb4.114a | 0 | 1 | 0.271136   | 3.43671   | 3.95009    | No change |
| NM_013513 | Epb4.2    | 0 | 1 | -0.208073  | 0.0802914 | 0.0620314  | No change |
| NM_013514 | Epb4.9    | 0 | 1 | -1.3336    | 0.764987  | 0.27173    | No change |
| NM_013516 | Ms4a2     | 0 | 1 | 0.113855   | 0         | 0          | No change |
| NM_013517 | Fcer2a    | 0 | 1 | 0.961852   | 0.124396  | 0.256282   | No change |
| NM_013518 | Fgf9      | 0 | 1 | 0.814295   | 0.252572  | 0.433625   | No change |
| NM_013519 | Foxc2     | 0 | 1 | 1.11385    | 0         | 0.026355   | No change |
| NM_013520 | Flt3l     | 0 | 1 | 0.271396   | 1.62077   | 1.8699     | No change |
| NM_013521 | Fpr1      | 0 | 1 | 0.85082    | 0.105356  | 0.217055   | No change |
| NM_013522 | Frg1      | 0 | 1 | -0.126725  | 19.5371   | 17.024     | No change |
| NM_013523 | Fshr      | 0 | 1 | -3.05607   | 0.236247  | 0          | No change |
| NM_013526 | Gdf6      | 0 | 1 | -1.88615   | 0.0591956 | 0          | No change |
| NM_013527 | Gdf7      | 0 | 1 | 0.113855   | 0         | 0          | No change |
| NM_013529 | Gfpt2     | 0 | 1 | 0.469999   | 0.560158  | 0.745318   | No change |
| NM_013530 | Gnb3      | 0 | 1 | -2.20807   | 0.151014  | 0          | No change |
| NM_013531 | Gnb4      | 0 | 1 | 0.141336   | 1.29202   | 1.35701    | No change |
| NM_013532 | Lilrb4    | 0 | 1 | 0.0410985  | 2.94893   | 2.88581    | No change |
| NM_013536 | Emg1      | 0 | 1 | 0.210285   | 28.8776   | 31.8079    | No change |
| NM_013542 | Gzmb      | 0 | 1 | 0.389489   | 0.885927  | 1.1154     | No change |
| NM_013544 | H2-M10.1  | 0 | 1 | 0.113855   | 0         | 0          | No change |
| NM_013547 | Hgd       | 0 | 1 | -1.88615   | 0.122411  | 0          | No change |
| NM_013553 | Hoxc4     | 0 | 1 | 0.628428   | 0.456888  | 0.687861   | No change |
| NM_013554 | Hoxd10    | 0 | 1 | -0.722646  | 0.934953  | 0.521678   | No change |
| NM_013557 | Eif2ak1   | 0 | 1 | -0.0781788 | 8.40216   | 7.57321    | No change |
| NM_013560 | Hspb1     | 0 | 1 | 0.298279   | 10.1105   | 11.8459    | No change |
| NM_013562 | lfrd1     | 0 | 1 | 0.141547   | 9.86293   | 10.3575    | No change |
| NM_013563 | Il2rg     | 0 | 1 | -0.638218  | 1.34025   | 0.801636   | No change |
| NM_013566 | Itgb7     | 0 | 1 | 0.3065     | 1.43347   | 1.69141    | No change |
| NM_013568 | Kcna6     | 0 | 1 | -1.20807   | 0.107422  | 0.0368852  | No change |
| NM_013569 | Kcnh2     | 0 | 1 | 0.188623   | 3.08756   | 3.35059    | No change |
| NM_013570 | Krt33b    | 0 | 1 | 0.113855   | 0         | 0          | No change |
| NM_013571 | Ksr1      | 0 | 1 | -0.108538  | 0.700174  | 0.615703   | No change |
| NM_013581 | Cog1      | 0 | 1 | -0.191274  | 14.2193   | 11.8506    | No change |
| NM_013586 | Lox3      | 0 | 1 | 0.357309   | 2.32367   | 2.83689    | No change |
| NM_013590 | Lyz1      | 0 | 1 | 0.206964   | 0.771305  | 0.851276   | No change |
| NM_013591 | Madcam1   | 0 | 1 | -2.20807   | 0.441716  | 0.050557   | No change |
| NM_013592 | Matn4     | 0 | 1 | 1.11385    | 0         | 0.031227   | No change |
| NM_013595 | Mbd3      | 0 | 1 | -0.142193  | 18.0263   | 15.5419    | No change |
| NM_013596 | Mc5r      | 0 | 1 | 0.92121    | 0.17993   | 0.370693   | No change |
| NM_013598 | Kitl      | 0 | 1 | -0.204922  | 4.37339   | 3.60931    | No change |
| NM_013599 | Mmp9      | 0 | 1 | 0.833747   | 0.355236  | 0.617508   | No change |
| NM_013601 | Msx2      | 0 | 1 | -0.471108  | 0.161177  | 0.0996174  | No change |
| NM_013602 | Mt1       | 0 | 1 | -0.0974769 | 169.732   | 150.999    | No change |
| NM_013603 | Mt3       | 0 | 1 | 0.113855   | 0.906785  | 0.934083   | No change |
| NM_013606 | Mx2       | 0 | 1 | -0.273168  | 0.461352  | 0.35643    | No change |
| NM_013610 | Ninj1     | 0 | 1 | 0.286691   | 6.71072   | 7.80061    | No change |
| NM_013611 | Nodal     | 0 | 1 | -1.47111   | 0.0665644 | 0          | No change |
| NM_013612 | Slc11a1   | 0 | 1 | -0.393105  | 0.786465  | 0.560867   | No change |
| NM_013616 | Olfrr65   | 0 | 1 | 0.113855   | 0         | 0          | No change |
| NM_013617 | Olfrr64   | 0 | 1 | 0.113855   | 0         | 0          | No change |
| NM_013618 | Olfrr66   | 0 | 1 | 0.113855   | 0         | 0          | No change |
| NM_013619 | Olfrr67   | 0 | 1 | 0.113855   | 0         | 0          | No change |
| NM_013620 | Olfrr68   | 0 | 1 | 0.113855   | 0         | 0          | No change |
| NM_013621 | Olfrr69   | 0 | 1 | 0.113855   | 0         | 0          | No change |
| NM_013622 | Oprd1     | 0 | 1 | -2.6935    | 0.103993  | 0          | No change |
| NM_013623 | Orm3      | 0 | 1 | -1.47111   | 0.180318  | 0          | No change |
| NM_013624 | Otog      | 0 | 1 | -0.886145  | 0.0208184 | 0.00714836 | No change |
| NM_013627 | Pax6      | 0 | 1 | -0.471108  | 0.136653  | 0.08446    | No change |
| NM_013628 | Pcsk1     | 0 | 1 | -2.88615   | 0.193899  | 0          | No change |
| NM_013640 | Psmb10    | 0 | 1 | 0.282361   | 6.14615   | 7.12257    | No change |
| NM_013641 | Ptger1    | 0 | 1 | 0.278486   | 3.01266   | 3.48266    | No change |
| NM_013642 | Dusp1     | 0 | 1 | -0.335948  | 3.98348   | 2.99437    | No change |
| NM_013645 | Pvalb     | 0 | 1 | 0.85082    | 0.156262  | 0.321933   | No change |
| NM_013650 | S100a8    | 0 | 1 | 2.11385    | 0         | 0.549421   | No change |
| NM_013652 | Ccl4      | 0 | 1 | -0.208073  | 0.422381  | 0.326323   | No change |
| NM_013653 | Ccl5      | 0 | 1 | -0.734142  | 4.5937    | 2.56879    | No change |
| NM_013654 | Ccl7      | 0 | 1 | -0.371572  | 0.523351  | 0.359404   | No change |
| NM_013665 | Shox2     | 0 | 1 | 0.698817   | 0.043777  | 0.0901897  | No change |
| NM_013666 | St8sia5   | 0 | 1 | -0.528593  | 2.08781   | 1.3655     | No change |
| NM_013667 | Slc22a2   | 0 | 1 | 0.113855   | 0         | 0          | No change |
| NM_013673 | Sp100     | 0 | 1 | -0.282074  | 1.58246   | 1.23089    | No change |

|           |          |   |   |            |           |           |           |
|-----------|----------|---|---|------------|-----------|-----------|-----------|
| NM_013675 | Spnb1    | 0 | 1 | -0.205269  | 1.71651   | 1.41593   | No change |
| NM_013679 | Svs6     | 0 | 1 | -0.886145  | 0.131002  | 0         | No change |
| NM_013690 | Tek      | 0 | 1 | 0.0907712  | 0.928441  | 0.940965  | No change |
| NM_013693 | Trnf     | 0 | 1 | -0.108538  | 0.258441  | 0.221851  | No change |
| NM_013696 | Trhr     | 0 | 1 | -0.886145  | 0.0525852 | 0.0180561 | No change |
| NM_013697 | Trr      | 0 | 1 | 0.113855   | 0.114157  | 0.117594  | No change |
| NM_013701 | Ugt1a2   | 0 | 1 | 0.054659   | 12.956    | 12.8086   | No change |
| NM_013702 | Uncx     | 0 | 1 | 0.113855   | 0         | 0         | No change |
| NM_013705 | Zfp30    | 0 | 1 | 0.751285   | 0.21411   | 0.358403  | No change |
| NM_013707 | Krtap14  | 0 | 1 | 0.113855   | 0         | 0         | No change |
| NM_013708 | Nr2e3    | 0 | 1 | 0.113855   | 0         | 0         | No change |
| NM_013711 | Txnrd2   | 0 | 1 | 0.445061   | 1.09753   | 1.43205   | No change |
| NM_013712 | Itgb1bp2 | 0 | 1 | 0.64437    | 0.431201  | 0.666274  | No change |
| NM_013713 | Krtap15  | 0 | 1 | 0.113855   | 0         | 0         | No change |
| NM_013723 | Podxl    | 0 | 1 | 0.119904   | 3.09892   | 3.20568   | No change |
| NM_013728 | Olf154   | 0 | 1 | 0.113855   | 0         | 0         | No change |
| NM_013729 | Mixl1    | 0 | 1 | 0.113855   | 0         | 0         | No change |
| NM_013730 | Slamf1   | 0 | 1 | -2.47111   | 0.129637  | 0         | No change |
| NM_013736 | Tceb3    | 0 | 1 | -0.0704541 | 17.1956   | 15.587    | No change |
| NM_013739 | Dok3     | 0 | 1 | -1.54911   | 0.811431  | 0.232183  | No change |
| NM_013742 | Cars     | 0 | 1 | 0.120368   | 11.3874   | 11.7834   | No change |
| NM_013743 | Pdk4     | 0 | 1 | 0.00693961 | 0.544949  | 0.519772  | No change |
| NM_013745 | Nufip1   | 0 | 1 | 0.435783   | 1.38544   | 1.78845   | No change |
| NM_013748 | Clnk     | 0 | 1 | -2.88615   | 0.308181  | 0         | No change |
| NM_013750 | Phlda3   | 0 | 1 | 0.528892   | 2.6604    | 3.6703    | No change |
| NM_013756 | Defb3    | 0 | 1 | 0.85082    | 0.432875  | 0.891813  | No change |
| NM_013768 | Prmt5    | 0 | 1 | 0.170261   | 16.5194   | 17.6963   | No change |
| NM_013772 | Tcl1b3   | 0 | 1 | 0.113855   | 0         | 0         | No change |
| NM_013773 | Tcl1b1   | 0 | 1 | 0.113855   | 0         | 0         | No change |
| NM_013774 | Tcl1b4   | 0 | 1 | -1.47111   | 0.135195  | 0         | No change |
| NM_013775 | Tcl1b2   | 0 | 1 | -0.886145  | 0.0690713 | 0         | No change |
| NM_013776 | Tcl1b5   | 0 | 1 | 0.113855   | 0         | 0         | No change |
| NM_013779 | Magel2   | 0 | 1 | -0.886145  | 0.0149492 | 0         | No change |
| NM_013781 | Sh2d3c   | 0 | 1 | 0.457809   | 0.566609  | 0.747093  | No change |
| NM_013784 | Pign     | 0 | 1 | -0.0398446 | 14.5945   | 13.5128   | No change |
| NM_013786 | Hsd17b6  | 0 | 1 | -2.20807   | 0.19107   | 0         | No change |
| NM_013788 | Peg12    | 0 | 1 | 0.28378    | 0.184792  | 0.217548  | No change |
| NM_013792 | Naglu    | 0 | 1 | 0.137986   | 11.6483   | 12.2019   | No change |
| NM_013793 | Klra15   | 0 | 1 | 0.113855   | 0         | 0         | No change |
| NM_013800 | Barx2    | 0 | 1 | -0.623111  | 0.155651  | 0.0801686 | No change |
| NM_013803 | Casr     | 0 | 1 | -1.10854   | 0.199825  | 0.0791696 | No change |
| NM_013805 | Cldn5    | 0 | 1 | 0.361782   | 2.31325   | 2.83919   | No change |
| NM_013806 | Abcc2    | 0 | 1 | 0.85082    | 0.0258649 | 0.053287  | No change |
| NM_013809 | Cyp2g1   | 0 | 1 | 1.69882    | 0         | 0.0774862 | No change |
| NM_013819 | H2-M3    | 0 | 1 | -0.301183  | 2.29864   | 1.76329   | No change |
| NM_013825 | Ly75     | 0 | 1 | 0.180969   | 0.552477  | 0.59687   | No change |
| NM_013829 | Plcb4    | 0 | 1 | 0.0112851  | 1.90655   | 1.82783   | No change |
| NM_013831 | Pstpip2  | 0 | 1 | 0.113855   | 0.431344  | 0.44433   | No change |
| NM_013833 | Rax      | 0 | 1 | 0.113855   | 0         | 0         | No change |
| NM_013838 | Trpc6    | 0 | 1 | 1.11385    | 0.256617  | 0.550713  | No change |
| NM_013845 | Ror1     | 0 | 1 | -0.314988  | 0.668989  | 0.506712  | No change |
| NM_013848 | Ermap    | 0 | 1 | -0.886145  | 0.0459413 | 0.0157748 | No change |
| NM_013850 | Abca7    | 0 | 1 | -0.248715  | 0.465042  | 0.370169  | No change |
| NM_013852 | Abcf3    | 0 | 1 | -0.0611548 | 12.7813   | 11.6595   | No change |
| NM_013863 | Bag3     | 0 | 1 | -0.0376783 | 9.1383    | 8.47205   | No change |
| NM_013867 | Bcar3    | 0 | 1 | -0.408098  | 2.34422   | 1.67512   | No change |
| NM_013874 | Dpf1     | 0 | 1 | -1.08778   | 0.673066  | 0.283634  | No change |
| NM_013877 | Cabp5    | 0 | 1 | 0.113855   | 0         | 0         | No change |
| NM_013880 | Plcl2    | 0 | 1 | 0.248156   | 2.09887   | 2.37472   | No change |
| NM_013891 | Spdef    | 0 | 1 | -0.14918   | 0.878804  | 0.747823  | No change |
| NM_013892 | Pcsk1n   | 0 | 1 | -1.6935    | 0.190678  | 0.0327364 | No change |
| NM_013897 | Timm8b   | 0 | 1 | 0.0676974  | 121.665   | 121.377   | No change |
| NM_013899 | Timm10   | 0 | 1 | 0.478427   | 8.26688   | 10.995    | No change |
| NM_013903 | Mmp20    | 0 | 1 | 0.113855   | 0         | 0         | No change |
| NM_013905 | Heyl     | 0 | 1 | 0.435783   | 0.599741  | 0.776204  | No change |
| NM_013906 | Adamts8  | 0 | 1 | -0.0877791 | 0.422149  | 0.375559  | No change |
| NM_013907 | Fbxw4    | 0 | 1 | 0.291498   | 5.15713   | 6.01332   | No change |
| NM_013914 | Snai3    | 0 | 1 | 0.336247   | 0.745614  | 0.903599  | No change |
| NM_013920 | Hnf4g    | 0 | 1 | 0.64437    | 0.133384  | 0.206098  | No change |
| NM_013921 | Prss30   | 0 | 1 | 0.113855   | 0.0948849 | 0.0977413 | No change |
| NM_013922 | Zfp354c  | 0 | 1 | 0.223479   | 0.973909  | 1.08349   | No change |
| NM_013924 | Abt1     | 0 | 1 | 0.277635   | 2.84652   | 3.28666   | No change |
| NM_013925 | Adat1    | 0 | 1 | -0.139529  | 3.26513   | 2.81801   | No change |
| NM_015730 | Chrna4   | 0 | 1 | -1.20807   | 0.0628289 | 0.0161801 | No change |
| NM_015734 | Col5a1   | 0 | 1 | -0.139432  | 0.970492  | 0.837362  | No change |
| NM_015738 | Galr3    | 0 | 1 | 0.528892   | 0.279891  | 0.403644  | No change |

|           |          |   |   |             |           |           |           |
|-----------|----------|---|---|-------------|-----------|-----------|-----------|
| NM_015739 | Gbx1     | 0 | 1 | 0.113855    | 0         | 0         | No change |
| NM_015741 | Krtap9-1 | 0 | 1 | 0.113855    | 0         | 0         | No change |
| NM_015743 | Nr4a3    | 0 | 1 | -2.20807    | 0.147968  | 0         | No change |
| NM_015745 | Rbp3     | 0 | 1 | -1.47111    | 0.0264189 | 0         | No change |
| NM_015748 | Slit1    | 0 | 1 | -0.116013   | 1.70307   | 1.49393   | No change |
| NM_015758 | Foxe3    | 0 | 1 | 0.113855    | 0         | 0         | No change |
| NM_015759 | Fgd3     | 0 | 1 | 0.113855    | 0.605051  | 0.623266  | No change |
| NM_015760 | Nox4     | 0 | 1 | 0.239386    | 0.198952  | 0.225436  | No change |
| NM_015766 | Ebi3     | 0 | 1 | 0.751285    | 0.476126  | 0.796996  | No change |
| NM_015770 | a        | 0 | 1 | -2.47111    | 0.503562  | 0         | No change |
| NM_015776 | Mfap5    | 0 | 1 | -0.581291   | 1.63111   | 1.01831   | No change |
| NM_015779 | Elane    | 0 | 1 | 0.113855    | 0         | 0         | No change |
| NM_015783 | Isg15    | 0 | 1 | 0.633229    | 2.67341   | 3.98839   | No change |
| NM_015793 | Fbxw14   | 0 | 1 | 0.113855    | 0         | 0         | No change |
| NM_015795 | Fbxo16   | 0 | 1 | 0.599282    | 2.49511   | 3.62168   | No change |
| NM_015799 | Trfr2    | 0 | 1 | -1.6935     | 0.142911  | 0.0245355 | No change |
| NM_015807 | Nt5c     | 0 | 1 | -0.352845   | 17.1632   | 12.7688   | No change |
| NM_015808 | Krtap5-1 | 0 | 1 | 0.113855    | 0         | 0         | No change |
| NM_015809 | Krtap5-4 | 0 | 1 | 0.113855    | 0         | 0         | No change |
| NM_015810 | Polg2    | 0 | 1 | 0.113855    | 2.51902   | 2.59485   | No change |
| NM_015811 | Rgs1     | 0 | 1 | 0.113855    | 1.20522   | 1.2415    | No change |
| NM_015812 | Rgs6     | 0 | 1 | -0.108538   | 0.345015  | 0.300724  | No change |
| NM_015816 | Lsm4     | 0 | 1 | -0.257512   | 20.7895   | 16.5378   | No change |
| NM_015820 | Hs6st3   | 0 | 1 | -0.886145   | 0.195328  | 0.0804832 | No change |
| NM_015821 | Fbxl8    | 0 | 1 | 0.461778    | 0.366612  | 0.490943  | No change |
| NM_015825 | Sh3bgr   | 0 | 1 | 0.320306    | 1.31894   | 1.57603   | No change |
| NM_016659 | Klra1    | 0 | 1 | 1.11385     | 0         | 0.043066  | No change |
| NM_016669 | Crym     | 0 | 1 | -0.301183   | 0.388416  | 0.285792  | No change |
| NM_016670 | Pknx1    | 0 | 1 | 0.0648622   | 9.89233   | 9.84932   | No change |
| NM_016671 | Il27ra   | 0 | 1 | 0.265858    | 0.209761  | 0.243085  | No change |
| NM_016678 | Reck     | 0 | 1 | -0.354821   | 2.13811   | 1.58708   | No change |
| NM_016687 | Sirp4    | 0 | 1 | 0.528892    | 0.198217  | 0.285857  | No change |
| NM_016694 | Park2    | 0 | 1 | -0.252928   | 3.17875   | 2.53433   | No change |
| NM_016700 | Mapk8    | 0 | 1 | 0.129248    | 10.1464   | 10.5641   | No change |
| NM_016702 | Agxt     | 0 | 1 | -0.886145   | 0.0459413 | 0         | No change |
| NM_016704 | C6       | 0 | 1 | -1.30118    | 0.171718  | 0.0505392 | No change |
| NM_016708 | Npy5r    | 0 | 1 | 0.113855    | 0         | 0         | No change |
| NM_016712 | Tmod4    | 0 | 1 | -1.20807    | 0.786222  | 0.289246  | No change |
| NM_016717 | Scly     | 0 | 1 | -0.179876   | 3.56833   | 2.99265   | No change |
| NM_016718 | Ninj2    | 0 | 1 | -0.623111   | 0.339138  | 0.174674  | No change |
| NM_016719 | Grb14    | 0 | 1 | -0.85138    | 1.42013   | 0.731441  | No change |
| NM_016721 | Iqgap1   | 0 | 1 | 0.00453518  | 27.1139   | 25.8912   | No change |
| NM_016736 | Nub1     | 0 | 1 | -0.00341124 | 16.2583   | 15.4387   | No change |
| NM_016751 | Clec4f   | 0 | 1 | 0.113855    | 0         | 0         | No change |
| NM_016753 | Lxn      | 0 | 1 | 0.173976    | 5.93539   | 6.37704   | No change |
| NM_016754 | Mylpf    | 0 | 1 | -2.05607    | 0.738468  | 0.0950874 | No change |
| NM_016755 | Atp5j    | 0 | 1 | 0.0118202   | 83.3925   | 80.0308   | No change |
| NM_016758 | Rgs14    | 0 | 1 | -0.301183   | 0.0887431 | 0.0609431 | No change |
| NM_016767 | Batf     | 0 | 1 | -0.886145   | 0.38547   | 0.15883   | No change |
| NM_016768 | Pbx3     | 0 | 1 | 0.373098    | 3.66958   | 4.53006   | No change |
| NM_016771 | Sult1d1  | 0 | 1 | 0.0549611   | 0.698676  | 0.689721  | No change |
| NM_016779 | Dmp1     | 0 | 1 | 0.113855    | 0         | 0         | No change |
| NM_016780 | Itgb3    | 0 | 1 | 0.00423032  | 0.482388  | 0.459641  | No change |
| NM_016782 | Cntnap1  | 0 | 1 | 0.528892    | 0.416077  | 0.575935  | No change |
| NM_016784 | Plrg1    | 0 | 1 | 0.189307    | 5.82414   | 6.32377   | No change |
| NM_016786 | Ube2k    | 0 | 1 | -0.162938   | 8.43591   | 7.17025   | No change |
| NM_016798 | Pdlim3   | 0 | 1 | 0.595388    | 2.2966    | 3.32113   | No change |
| NM_016801 | Stx1a    | 0 | 1 | -0.134073   | 1.24512   | 1.07461   | No change |
| NM_016803 | Chst3    | 0 | 1 | 0.435783    | 0.0798185 | 0.105713  | No change |
| NM_016810 | Gosr1    | 0 | 1 | 0.0170463   | 12.3209   | 11.867    | No change |
| NM_016849 | Irf3     | 0 | 1 | -0.0514298  | 13.3587   | 12.2674   | No change |
| NM_016850 | Irf7     | 0 | 1 | 0.37042     | 5.63637   | 6.94372   | No change |
| NM_016853 | Stac     | 0 | 1 | 0.435783    | 0.0831327 | 0.11418   | No change |
| NM_016854 | Ppp1r3c  | 0 | 1 | 0.300268    | 2.23976   | 2.62912   | No change |
| NM_016856 | Cpsf2    | 0 | 1 | -0.132616   | 5.6646    | 4.91663   | No change |
| NM_016858 | Rab33b   | 0 | 1 | 0.280213    | 5.3996    | 6.24449   | No change |
| NM_016864 | Atoh7    | 0 | 1 | 0.113855    | 0         | 0         | No change |
| NM_016870 | Acsm3    | 0 | 1 | 0.039087    | 2.47281   | 2.41729   | No change |
| NM_016873 | Wisp2    | 0 | 1 | -0.159164   | 1.09938   | 0.930249  | No change |
| NM_016880 | Krt35    | 0 | 1 | 1.11385     | 0         | 0.0416905 | No change |
| NM_016889 | Insm1    | 0 | 1 | -0.886145   | 0.0230619 | 0         | No change |
| NM_016892 | Ccs      | 0 | 1 | -0.0577218  | 28.7475   | 26.2849   | No change |
| NM_016896 | Map3k14  | 0 | 1 | 0.368038    | 1.8037    | 2.21928   | No change |
| NM_016897 | Timm23   | 0 | 1 | 0.10512     | 29.7484   | 30.4586   | No change |
| NM_016909 | Tsnax    | 0 | 1 | 0.113855    | 20.0247   | 20.6275   | No change |
| NM_016914 | Prg3     | 0 | 1 | -2.20807    | 0.293753  | 0         | No change |



|           |          |   |   |             |           |           |           |
|-----------|----------|---|---|-------------|-----------|-----------|-----------|
| NM_016916 | Bicap    | 0 | 1 | 0.0118339   | 8.30954   | 7.97294   | No change |
| NM_016917 | Slc40a1  | 0 | 1 | 0.404904    | 1.73201   | 2.18771   | No change |
| NM_016919 | Col5a3   | 0 | 1 | 0.461778    | 0.240478  | 0.318494  | No change |
| NM_016924 | Rwdd2b   | 0 | 1 | 0.301482    | 2.35181   | 2.76382   | No change |
| NM_016926 | Sart3    | 0 | 1 | 0.0114392   | 7.63785   | 7.32724   | No change |
| NM_016933 | Ptprcap  | 0 | 1 | 1.11385     | 0.741414  | 1.61233   | No change |
| NM_016967 | Olig2    | 0 | 1 | 1.69882     | 0         | 0.0589175 | No change |
| NM_016968 | Olig1    | 0 | 1 | -0.471108   | 0.449425  | 0.297613  | No change |
| NM_016970 | Klrg1    | 0 | 1 | -1.47111    | 0.10249   | 0         | No change |
| NM_016971 | Ii22     | 0 | 1 | -0.886145   | 0.0641149 | 0         | No change |
| NM_016972 | Slc7a8   | 0 | 1 | 0.0785937   | 8.56909   | 8.61349   | No change |
| NM_016975 | Gja3     | 0 | 1 | 0.113855    | 0         | 0         | No change |
| NM_016977 | Mc4r     | 0 | 1 | -2.88615    | 0.176438  | 0         | No change |
| NM_016981 | Slc9a1   | 0 | 1 | -0.178699   | 4.76623   | 4.00571   | No change |
| NM_016982 | Vpreb1   | 0 | 1 | 0.113855    | 0         | 0         | No change |
| NM_016983 | Vpreb2   | 0 | 1 | -0.886145   | 0.162454  | 0         | No change |
| NM_016984 | Trpc4    | 0 | 1 | 0.435783    | 0.0610984 | 0.083917  | No change |
| NM_017369 | Gabre    | 0 | 1 | 1.49237     | 0.0998824 | 0.308668  | No change |
| NM_017370 | Hp       | 0 | 1 | -0.71622    | 0.777245  | 0.42701   | No change |
| NM_017371 | Hpx      | 0 | 1 | 0.599282    | 0.188359  | 0.291044  | No change |
| NM_017373 | Nfil3    | 0 | 1 | 0.351354    | 3.28872   | 4.0004    | No change |
| NM_017374 | Ppp2cb   | 0 | 1 | 0.0580439   | 16.9677   | 16.8138   | No change |
| NM_017382 | Rab11a   | 0 | 1 | 0.0901005   | 31.0676   | 31.4797   | No change |
| NM_017385 | Ear7     | 0 | 1 | 0.113855    | 0         | 0         | No change |
| NM_017388 | Ear3     | 0 | 1 | -0.886145   | 0.443904  | 0.152422  | No change |
| NM_017389 | Ear14    | 0 | 1 | 0.113855    | 0         | 0         | No change |
| NM_017390 | Svs2     | 0 | 1 | -0.886145   | 0.0443904 | 0         | No change |
| NM_017394 | Slc7a10  | 0 | 1 | -0.108538   | 0.21444   | 0.184079  | No change |
| NM_017395 | Rfx5     | 0 | 1 | -0.22318    | 5.17415   | 4.21594   | No change |
| NM_017396 | Cyp3a41a | 0 | 1 | 0.113855    | 0         | 0         | No change |
| NM_017399 | Fabp1    | 0 | 1 | -0.886145   | 0.141652  | 0         | No change |
| NM_017461 | Sept1    | 0 | 1 | 0.509783    | 0.863367  | 1.18581   | No change |
| NM_017466 | Ccrl2    | 0 | 1 | 0.435783    | 0.495447  | 0.646459  | No change |
| NM_017468 | Enam     | 0 | 1 | -1.47111    | 0.025389  | 0         | No change |
| NM_017471 | Pbsn     | 0 | 1 | 0.113855    | 0         | 0         | No change |
| NM_017474 | Cica3    | 0 | 1 | -1.47111    | 0.0474909 | 0         | No change |
| NM_017480 | Icos     | 0 | 1 | 1.33625     | 0.0428352 | 0.132374  | No change |
| NM_018729 | Cd244    | 0 | 1 | 0.113855    | 0.203997  | 0.210139  | No change |
| NM_018733 | Scn1a    | 0 | 1 | -0.645137   | 0.176608  | 0.103957  | No change |
| NM_018734 | Gbp3     | 0 | 1 | -0.236088   | 1.69017   | 1.36019   | No change |
| NM_018738 | Igtp     | 0 | 1 | 0.248504    | 6.3044    | 7.13296   | No change |
| NM_018741 | Igfbpl1  | 0 | 1 | 1.11385     | 0         | 0.0263067 | No change |
| NM_018747 | Akap7    | 0 | 1 | 0.0317058   | 6.02533   | 5.86189   | No change |
| NM_018749 | Eif3d    | 0 | 1 | -0.12144    | 55.9733   | 48.9757   | No change |
| NM_018750 | Rassf5   | 0 | 1 | 0.0707861   | 2.06725   | 2.06623   | No change |
| NM_018751 | Sult1c1  | 0 | 1 | 0.113855    | 0         | 0         | No change |
| NM_018758 | Apba3    | 0 | 1 | -0.0892371  | 6.51614   | 5.82641   | No change |
| NM_018759 | Zfp326   | 0 | 1 | 0.0168931   | 5.20019   | 5.00679   | No change |
| NM_018762 | Gp9      | 0 | 1 | 0.528892    | 0.171869  | 0.265565  | No change |
| NM_018763 | Chst2    | 0 | 1 | 0.235845    | 0.36845   | 0.414046  | No change |
| NM_018768 | Stx8     | 0 | 1 | 0.158249    | 2.15668   | 2.29157   | No change |
| NM_018769 | Dfna5    | 0 | 1 | -0.760614   | 1.40497   | 0.774117  | No change |
| NM_018776 | Crif3    | 0 | 1 | 0.0890514   | 5.18108   | 5.24556   | No change |
| NM_018777 | Cldn6    | 0 | 1 | 0.403361    | 0.369969  | 0.476383  | No change |
| NM_018779 | Pde3a    | 0 | 1 | 0.467492    | 0.281755  | 0.375601  | No change |
| NM_018780 | Sfrp5    | 0 | 1 | -0.471108   | 0.073361  | 0.0377847 | No change |
| NM_018785 | Prpf40a  | 0 | 1 | 0.0482098   | 34.6999   | 34.1536   | No change |
| NM_018787 | Npff     | 0 | 1 | 0.528892    | 1.2501    | 1.77063   | No change |
| NM_018795 | Abcc6    | 0 | 1 | -2.20807    | 0.0562267 | 0         | No change |
| NM_018800 | Syt6     | 0 | 1 | -0.301183   | 0.0473457 | 0.032514  | No change |
| NM_018802 | Syt8     | 0 | 1 | -0.471108   | 0.0926152 | 0.0477016 | No change |
| NM_018803 | Syt10    | 0 | 1 | -1.10854    | 0.755479  | 0.311289  | No change |
| NM_018809 | Ptf1a    | 0 | 1 | 0.113855    | 0         | 0         | No change |
| NM_018816 | Apom     | 0 | 1 | 0.113855    | 0.487363  | 0.502035  | No change |
| NM_018820 | Sertad1  | 0 | 1 | -0.216618   | 7.39168   | 6.04301   | No change |
| NM_018822 | Sgsh     | 0 | 1 | 0.113855    | 3.67484   | 3.78546   | No change |
| NM_018825 | Sh2b2    | 0 | 1 | -0.886145   | 0.562829  | 0.277283  | No change |
| NM_018828 | Fnbp4    | 0 | 1 | 0.0114075   | 11.0409   | 10.5926   | No change |
| NM_018832 | Magix    | 0 | 1 | 0.503801    | 0.696432  | 0.947989  | No change |
| NM_018852 | Scn9a    | 0 | 1 | 0.528892    | 0.0142057 | 0.02195   | No change |
| NM_018857 | Msln     | 0 | 1 | 0.902351    | 0.329517  | 0.610987  | No change |
| NM_018859 | Akr1e1   | 0 | 1 | 0.0137268   | 21.1967   | 20.368    | No change |
| NM_018863 | Pdyn     | 0 | 1 | 0.113855    | 0         | 0         | No change |
| NM_018865 | Wisp1    | 0 | 1 | -0.00162241 | 0.527346  | 0.500335  | No change |
| NM_018866 | Cxcl13   | 0 | 1 | -0.748642   | 1.13956   | 0.617822  | No change |
| NM_018869 | Grk5     | 0 | 1 | 0.137125    | 2.68473   | 2.81089   | No change |

|           |          |   |   |            |           |           |           |
|-----------|----------|---|---|------------|-----------|-----------|-----------|
| NM_018874 | Pnliplr1 | 0 | 1 | 0.113855   | 0         | 0         | No change |
| NM_018876 | Fut2     | 0 | 1 | 0.21339    | 1.67847   | 1.85429   | No change |
| NM_018879 | Npri2    | 0 | 1 | -0.446233  | 5.44924   | 3.79143   | No change |
| NM_018884 | Pdzrn3   | 0 | 1 | 0.0626295  | 1.44274   | 1.43372   | No change |
| NM_018885 | Irx4     | 0 | 1 | 0.113855   | 0         | 0         | No change |
| NM_018887 | Cyp39a1  | 0 | 1 | 0.395268   | 1.46097   | 1.83416   | No change |
| NM_018889 | Pigb     | 0 | 1 | 0.261953   | 4.67162   | 5.33604   | No change |
| NM_019388 | Cd86     | 0 | 1 | 0.613426   | 0.768571  | 1.13101   | No change |
| NM_019393 | Exosc9   | 0 | 1 | -0.0456234 | 7.37013   | 6.79284   | No change |
| NM_019398 | Ear5     | 0 | 1 | 0.113855   | 0         | 0         | No change |
| NM_019404 | Avpr2    | 0 | 1 | 0.113855   | 0.115449  | 0.118925  | No change |
| NM_019406 | Fnbp1    | 0 | 1 | 0.354169   | 5.59938   | 6.81996   | No change |
| NM_019409 | Omg      | 0 | 1 | 0.0903958  | 1.90982   | 1.93507   | No change |
| NM_019412 | Prx      | 0 | 1 | 0.579518   | 0.543234  | 0.777963  | No change |
| NM_019414 | Selenbp2 | 0 | 1 | 0.175916   | 3.70051   | 3.98133   | No change |
| NM_019418 | Tnfsf14  | 0 | 1 | 0.113855   | 0.11265   | 0.116041  | No change |
| NM_019420 | B3galt4  | 0 | 1 | -0.645137  | 1.90031   | 1.13809   | No change |
| NM_019426 | Atf7ip   | 0 | 1 | -0.150834  | 10.7303   | 9.19787   | No change |
| NM_019429 | Prss16   | 0 | 1 | -0.623111  | 0.129541  | 0.0667202 | No change |
| NM_019430 | Cacng3   | 0 | 1 | 0.113855   | 0         | 0         | No change |
| NM_019431 | Cacng4   | 0 | 1 | -0.108538  | 0.424957  | 0.364792  | No change |
| NM_019434 | Mcm3ap   | 0 | 1 | 0.158879   | 3.77781   | 4.01526   | No change |
| NM_019436 | Sit1     | 0 | 1 | 1.11385    | 0.116058  | 0.29888   | No change |
| NM_019440 | Irgm2    | 0 | 1 | 0.127862   | 4.04592   | 4.20858   | No change |
| NM_019442 | Stk19    | 0 | 1 | 0.0865475  | 10.2794   | 10.389    | No change |
| NM_019444 | Ramp2    | 0 | 1 | 0.485824   | 1.27877   | 1.72891   | No change |
| NM_019450 | Il1f6    | 0 | 1 | 0.113855   | 0         | 0         | No change |
| NM_019454 | Dll4     | 0 | 1 | 0.172748   | 0.464485  | 0.499271  | No change |
| NM_019455 | Hpgds    | 0 | 1 | 0.167294   | 2.21885   | 2.37272   | No change |
| NM_019456 | Apbb1ip  | 0 | 1 | 0.113855   | 0.274382  | 0.282642  | No change |
| NM_019458 | Paf1     | 0 | 1 | 0.0486196  | 16.9147   | 16.652    | No change |
| NM_019459 | Nphs1    | 0 | 1 | 0.113855   | 0         | 0         | No change |
| NM_019461 | Usp27x   | 0 | 1 | -0.236642  | 1.07551   | 0.864151  | No change |
| NM_019471 | Mmp10    | 0 | 1 | -0.886145  | 0.040661  | 0         | No change |
| NM_019472 | Myo10    | 0 | 1 | -0.201564  | 3.32199   | 2.74823   | No change |
| NM_019473 | Olf155   | 0 | 1 | 0.113855   | 0         | 0         | No change |
| NM_019474 | Olf156   | 0 | 1 | 0.113855   | 0         | 0         | No change |
| NM_019475 | Olf157   | 0 | 1 | 0.113855   | 0         | 0         | No change |
| NM_019476 | Olf159   | 0 | 1 | 0.113855   | 0         | 0         | No change |
| NM_019480 | Ebag9    | 0 | 1 | 0.0239127  | 8.07065   | 7.80836   | No change |
| NM_019481 | Slc13a1  | 0 | 1 | 0.113855   | 0         | 0         | No change |
| NM_019482 | Panx1    | 0 | 1 | 0.677756   | 0.738913  | 1.14174   | No change |
| NM_019483 | Smad9    | 0 | 1 | 0.0649452  | 0.376508  | 0.374469  | No change |
| NM_019484 | Refbp2   | 0 | 1 | 0.443162   | 2.08039   | 2.70697   | No change |
| NM_019485 | Olf170   | 0 | 1 | 0.698817   | 0.0296314 | 0.0610467 | No change |
| NM_019486 | Olf171   | 0 | 1 | 1.11385    | 0         | 0.0764547 | No change |
| NM_019488 | Slc2a8   | 0 | 1 | -0.190013  | 8.5987    | 7.16876   | No change |
| NM_019489 | Ppie     | 0 | 1 | -0.118806  | 11.158    | 9.77291   | No change |
| NM_019491 | Rala     | 0 | 1 | 0.145884   | 12.8023   | 13.4844   | No change |
| NM_019496 | Ammecr1  | 0 | 1 | -0.130564  | 1.70365   | 1.47785   | No change |
| NM_019501 | Pdss1    | 0 | 1 | 0.201318   | 2.00341   | 2.19544   | No change |
| NM_019506 | Gdf2     | 0 | 1 | 0.113855   | 0         | 0         | No change |
| NM_019507 | Tbx21    | 0 | 1 | 1.69882    | 0.0273091 | 0.140656  | No change |
| NM_019508 | Il17b    | 0 | 1 | -0.886145  | 0.100712  | 0         | No change |
| NM_019510 | Trpc3    | 0 | 1 | 0.393963   | 0.245265  | 0.310952  | No change |
| NM_019514 | Astn2    | 0 | 1 | -0.760614  | 0.149076  | 0.0767818 | No change |
| NM_019515 | Nmu      | 0 | 1 | -2.47111   | 0.426517  | 0         | No change |
| NM_019516 | Lgals12  | 0 | 1 | 0.528892   | 0.126484  | 0.182409  | No change |
| NM_019517 | Bace2    | 0 | 1 | 0.624817   | 0.727523  | 1.0761    | No change |
| NM_019518 | Grasp    | 0 | 1 | 0.64437    | 0.276834  | 0.427752  | No change |
| NM_019519 | Rabggta  | 0 | 1 | 0.0771223  | 9.7685    | 9.8089    | No change |
| NM_019521 | Gas6     | 0 | 1 | -0.118526  | 20.7493   | 18.19     | No change |
| NM_019537 | Psmg1    | 0 | 1 | 0.0555562  | 14.2216   | 14.0667   | No change |
| NM_019539 | Cts7     | 0 | 1 | 0.113855   | 0         | 0         | No change |
| NM_019540 | Pfpl     | 0 | 1 | -0.886145  | 0.0533637 | 0.0183234 | No change |
| NM_019541 | Cts8     | 0 | 1 | 0.113855   | 0         | 0         | No change |
| NM_019544 | Msgn1    | 0 | 1 | 0.113855   | 0         | 0         | No change |
| NM_019546 | Prodh2   | 0 | 1 | -2.6935    | 0.230136  | 0         | No change |
| NM_019547 | Rbm38    | 0 | 1 | 0.059407   | 2.08215   | 2.06389   | No change |
| NM_019549 | Plek     | 0 | 1 | 0.383315   | 1.87902   | 2.33665   | No change |
| NM_019551 | Tdp2     | 0 | 1 | -0.0750479 | 7.72016   | 6.97211   | No change |
| NM_019553 | Ddx21    | 0 | 1 | -0.073059  | 18.9698   | 17.1644   | No change |
| NM_019564 | Htra1    | 0 | 1 | 0.370195   | 4.88773   | 6.02072   | No change |
| NM_019566 | Rhog     | 0 | 1 | 0.356898   | 5.95478   | 7.26997   | No change |
| NM_019573 | Wwox     | 0 | 1 | -0.151735  | 3.46762   | 2.96604   | No change |
| NM_019575 | Scamp4   | 0 | 1 | -0.0612319 | 8.08314   | 7.37033   | No change |

|           |               |   |   |             |           |           |           |
|-----------|---------------|---|---|-------------|-----------|-----------|-----------|
| NM_019577 | Ccl24         | 0 | 1 | -0.0787903  | 0.378472  | 0.334171  | No change |
| NM_019582 | Cacna1f       | 0 | 1 | -0.886145   | 0.0114721 | 0         | No change |
| NM_019584 | Becn1         | 0 | 1 | -0.00458233 | 61.3545   | 58.2175   | No change |
| NM_019587 | Plxnb3        | 0 | 1 | -0.371572   | 0.0694383 | 0.0476858 | No change |
| NM_019588 | Plce1         | 0 | 1 | -0.173026   | 2.22806   | 1.8799    | No change |
| NM_019626 | Cbln1         | 0 | 1 | 0.765932    | 0.805871  | 1.32206   | No change |
| NM_019631 | Tmem45a       | 0 | 1 | 0.824348    | 0.542458  | 0.931314  | No change |
| NM_019640 | Pitpnb        | 0 | 1 | 0.274049    | 7.06774   | 8.13856   | No change |
| NM_019645 | Pkp1          | 0 | 1 | 0.183117    | 0.932139  | 1.00821   | No change |
| NM_019648 | Metap2        | 0 | 1 | 0.0131139   | 31.0538   | 29.8302   | No change |
| NM_019649 | Clptm1        | 0 | 1 | 0.0587285   | 20.6835   | 20.5067   | No change |
| NM_019650 | Gosr2         | 0 | 1 | -0.0105217  | 53.9792   | 51.0094   | No change |
| NM_019654 | Socs5         | 0 | 1 | -0.184585   | 3.1246    | 2.61415   | No change |
| NM_019660 | Mycbp         | 0 | 1 | 0.113855    | 16.8953   | 17.4039   | No change |
| NM_019662 | Rrad          | 0 | 1 | -0.0612319  | 1.50448   | 1.36745   | No change |
| NM_019665 | Arl6          | 0 | 1 | -0.0544167  | 20.265    | 18.5716   | No change |
| NM_019675 | Stmn4         | 0 | 1 | -0.886145   | 0.0565689 | 0         | No change |
| NM_019684 | Srpk3         | 0 | 1 | 1.61636     | 0.177516  | 0.585153  | No change |
| NM_019685 | Ruvbl1        | 0 | 1 | -0.173722   | 6.94824   | 5.85606   | No change |
| NM_019686 | Cib2          | 0 | 1 | 0.288942    | 5.77618   | 6.7304    | No change |
| NM_019690 | Gnas          | 0 | 1 | -0.371572   | 1.73703   | 1.26562   | No change |
| NM_019697 | Kcnd2         | 0 | 1 | -1.02365    | 0.153306  | 0.0631685 | No change |
| NM_019704 | Tmem115       | 0 | 1 | -0.1096     | 14.47     | 12.7621   | No change |
| NM_019707 | Cdh13         | 0 | 1 | 0.814295    | 0.699973  | 1.19129   | No change |
| NM_019720 | Cyb561d2      | 0 | 1 | 0.245415    | 7.74366   | 8.74222   | No change |
| NM_019724 | Mmp16         | 0 | 1 | 0.28378     | 0.106611  | 0.125509  | No change |
| NM_019728 | Defb4         | 0 | 1 | -0.886145   | 0.152168  | 0         | No change |
| NM_019731 | Nme4          | 0 | 1 | 0.0572713   | 2.01891   | 1.9965    | No change |
| NM_019732 | Runx3         | 0 | 1 | -1.27846    | 0.358226  | 0.129154  | No change |
| NM_019735 | Apip          | 0 | 1 | 0.216948    | 8.0705    | 8.93502   | No change |
| NM_019736 | Acot9         | 0 | 1 | -0.199961   | 5.94281   | 4.91592   | No change |
| NM_019737 | B4galt6       | 0 | 1 | -0.514176   | 0.803965  | 0.53151   | No change |
| NM_019739 | Foxo1         | 0 | 1 | 0.317786    | 2.38502   | 2.83181   | No change |
| NM_019740 | Foxo3         | 0 | 1 | 0.101646    | 8.56386   | 8.74712   | No change |
| NM_019743 | Rybp          | 0 | 1 | 0.0700286   | 10.0972   | 10.0895   | No change |
| NM_019747 | Zfp113        | 0 | 1 | 0.264218    | 2.83296   | 3.24003   | No change |
| NM_019748 | Sae1          | 0 | 1 | -0.151966   | 34.7161   | 29.737    | No change |
| NM_019752 | Htra2         | 0 | 1 | 0.0527792   | 7.76613   | 7.66659   | No change |
| NM_019754 | Tagln3        | 0 | 1 | -1.47111    | 0.479401  | 0.123458  | No change |
| NM_019759 | Dpt           | 0 | 1 | 0.484223    | 1.70398   | 2.28186   | No change |
| NM_019763 | Spn           | 0 | 1 | -0.118655   | 2.69728   | 2.36404   | No change |
| NM_019775 | Cpb2          | 0 | 1 | -0.6935     | 0.283497  | 0.146016  | No change |
| NM_019781 | Pex14         | 0 | 1 | -0.0787903  | 12.0222   | 10.8315   | No change |
| NM_019790 | Tmeff2        | 0 | 1 | -0.0787903  | 0.146107  | 0.129004  | No change |
| NM_019792 | Cyp3a25       | 0 | 1 | -0.886145   | 0.0348117 | 0         | No change |
| NM_019797 | Trip4         | 0 | 1 | 0.144004    | 7.82367   | 8.2296    | No change |
| NM_019803 | Ube2g2        | 0 | 1 | -0.26635    | 11.9554   | 9.45381   | No change |
| NM_019810 | Slc5a1        | 0 | 1 | 0.698817    | 0.01772   | 0.036507  | No change |
| NM_019814 | Higd1a        | 0 | 1 | 0.174441    | 16.4465   | 17.6699   | No change |
| NM_019820 | Cbln3         | 0 | 1 | -0.248715   | 0.118049  | 0.0912017 | No change |
| NM_019822 | Adrm1         | 0 | 1 | -0.229447   | 12.3877   | 10.0477   | No change |
| NM_019826 | Ivd           | 0 | 1 | 0.184244    | 12.7787   | 13.8233   | No change |
| NM_019836 | 2610024G14Rik | 0 | 1 | -0.408566   | 2.36042   | 1.68333   | No change |
| NM_019837 | Nudt3         | 0 | 1 | -0.0702676  | 34.7983   | 31.547    | No change |
| NM_019866 | Spib          | 0 | 1 | -0.886145   | 0.125077  | 0.051537  | No change |
| NM_019874 | Dnajb5        | 0 | 1 | -0.153841   | 3.71253   | 3.17136   | No change |
| NM_019875 | Abcb9         | 0 | 1 | 0.102359    | 10.5146   | 10.745    | No change |
| NM_019878 | Sult1b1       | 0 | 1 | -1.47111    | 0.0535276 | 0         | No change |
| NM_019910 | Dcpp1         | 0 | 1 | -2.20807    | 0.451818  | 0         | No change |
| NM_019911 | Tdo2          | 0 | 1 | 1.11385     | 0.128034  | 0.307738  | No change |
| NM_019912 | Ube2d2        | 0 | 1 | 0.124092    | 27.5628   | 28.595    | No change |
| NM_019915 | Art2b         | 0 | 1 | 0.528892    | 0.160214  | 0.247555  | No change |
| NM_019916 | Tlx3          | 0 | 1 | 0.113855    | 0         | 0         | No change |
| NM_019917 | Vmn2r26       | 0 | 1 | -1.88615    | 0.081417  | 0         | No change |
| NM_019918 | Vmn2r1        | 0 | 1 | 0.113855    | 0.559783  | 0.576634  | No change |
| NM_019919 | Ltp1          | 0 | 1 | -0.0656946  | 0.96565   | 0.877065  | No change |
| NM_019922 | Crtap         | 0 | 1 | -0.23041    | 7.23766   | 5.86391   | No change |
| NM_019924 | Rps6ka4       | 0 | 1 | -0.146535   | 4.86908   | 4.18357   | No change |
| NM_019925 | Gpr132        | 0 | 1 | -0.41666    | 0.71436   | 0.500388  | No change |
| NM_019928 | Klk4          | 0 | 1 | 0.113855    | 0         | 0         | No change |
| NM_019931 | Kcnd3         | 0 | 1 | 0.341661    | 2.65598   | 3.21017   | No change |
| NM_019932 | Pf4           | 0 | 1 | -0.00162241 | 1.4223    | 1.34303   | No change |
| NM_019944 | Mnx1          | 0 | 1 | -1.47111    | 0.0957321 | 0         | No change |
| NM_019948 | Clec4e        | 0 | 1 | 0.113855    | 0.0276669 | 0.0284998 | No change |
| NM_019950 | Chst5         | 0 | 1 | -1.88615    | 0.108051  | 0         | No change |
| NM_019952 | Cicf1         | 0 | 1 | -0.208073   | 0.766793  | 0.614348  | No change |

|           |           |   |   |             |           |           |           |
|-----------|-----------|---|---|-------------|-----------|-----------|-----------|
| NM_019956 | Krt71     | 0 | 1 | 0.113855    | 0         | 0         | No change |
| NM_019957 | Dnase2b   | 0 | 1 | 0.48825     | 0.788176  | 1.06172   | No change |
| NM_019960 | Hspb3     | 0 | 1 | -3.05607    | 0.713884  | 0         | No change |
| NM_019965 | Dnajb12   | 0 | 1 | 0.0994517   | 11.825    | 12.0596   | No change |
| NM_019967 | Dbc1      | 0 | 1 | -1.88615    | 0.145453  | 0.0214046 | No change |
| NM_019975 | Hacl1     | 0 | 1 | -0.112314   | 6.76165   | 5.95059   | No change |
| NM_019977 | Miox      | 0 | 1 | 0.113855    | 0         | 0         | No change |
| NM_019988 | Mlst8     | 0 | 1 | 0.242841    | 5.74552   | 6.47401   | No change |
| NM_019991 | Prl2a1    | 0 | 1 | 0.113855    | 0         | 0         | No change |
| NM_020000 | Med8      | 0 | 1 | 0.0256276   | 8.87688   | 8.59935   | No change |
| NM_020013 | Fgf21     | 0 | 1 | 0.320306    | 0.883121  | 1.06132   | No change |
| NM_020019 | Magea6    | 0 | 1 | -3.20807    | 0.522262  | 0         | No change |
| NM_020021 | Mos       | 0 | 1 | -1.76061    | 0.481305  | 0.0991588 | No change |
| NM_020024 | Taf10     | 0 | 1 | 0.156394    | 36.8259   | 39.0725   | No change |
| NM_020025 | B3galt2   | 0 | 1 | -0.0466099  | 2.87723   | 2.65021   | No change |
| NM_020030 | Raet1d    | 0 | 1 | -0.734142   | 0.438665  | 0.225935  | No change |
| NM_020033 | Ankrd2    | 0 | 1 | -2.6935     | 0.380143  | 0         | No change |
| NM_020034 | Hist1h1b  | 0 | 1 | -1.16625    | 1.65936   | 0.640991  | No change |
| NM_020036 | Calm4     | 0 | 1 | 0.113855    | 0         | 0         | No change |
| NM_020043 | Igdcc4    | 0 | 1 | -0.208073   | 0.493481  | 0.404359  | No change |
| NM_020044 | Lat2      | 0 | 1 | -0.596639   | 2.44942   | 1.52342   | No change |
| NM_020051 | Ascl3     | 0 | 1 | -2.20807    | 0.394861  | 0         | No change |
| NM_020257 | Clec2i    | 0 | 1 | -1.47111    | 0.358134  | 0.0737831 | No change |
| NM_020261 | Psg23     | 0 | 1 | -0.208073   | 0.127936  | 0.0988403 | No change |
| NM_020262 | Zfp109    | 0 | 1 | 0.0434655   | 1.04019   | 1.01924   | No change |
| NM_020264 | Pate4     | 0 | 1 | 0.485824    | 1.09753   | 1.48387   | No change |
| NM_020265 | Dkk2      | 0 | 1 | 0.730526    | 0.263347  | 0.426289  | No change |
| NM_020268 | Klk1b27   | 0 | 1 | -1.58658    | 0.941796  | 0.242537  | No change |
| NM_020274 | Htr3b     | 0 | 1 | -1.47111    | 0.0578125 | 0         | No change |
| NM_020275 | Tnfrsf10b | 0 | 1 | -0.500855   | 1.0523    | 0.700069  | No change |
| NM_020277 | Trpm5     | 0 | 1 | -1.20807    | 0.302114  | 0.114656  | No change |
| NM_020278 | Lgi1      | 0 | 1 | -0.0667174  | 0.261819  | 0.235988  | No change |
| NM_020280 | Magea4    | 0 | 1 | -3.05607    | 0.588126  | 0         | No change |
| NM_020284 | Ctsr      | 0 | 1 | 0.113855    | 0         | 0         | No change |
| NM_020287 | Insm2     | 0 | 1 | -1.47111    | 0.112372  | 0.0231509 | No change |
| NM_020288 | Olfir749  | 0 | 1 | 0.113855    | 0         | 0         | No change |
| NM_020289 | Olfir544  | 0 | 1 | -1.6935     | 0.354071  | 0.0607883 | No change |
| NM_020290 | Olfir690  | 0 | 1 | -1.47111    | 0.131248  | 0         | No change |
| NM_020291 | Olfir480  | 0 | 1 | 0.113855    | 0         | 0         | No change |
| NM_020293 | Cldn9     | 0 | 1 | 0.113855    | 0.627864  | 0.646766  | No change |
| NM_020329 | Dolpp1    | 0 | 1 | -0.292138   | 5.27623   | 4.0935    | No change |
| NM_020488 | Gabrq     | 0 | 1 | 1.69882     | 0         | 0.071791  | No change |
| NM_020490 | Ltb4r2    | 0 | 1 | -0.14918    | 0.532747  | 0.449005  | No change |
| NM_020492 | Glra1     | 0 | 1 | 0.113855    | 0.049533  | 0.0510241 | No change |
| NM_020495 | Slco1b2   | 0 | 1 | -2.20807    | 0.0845788 | 0         | No change |
| NM_020501 | Tas2r105  | 0 | 1 | 0.113855    | 0         | 0         | No change |
| NM_020502 | Tas2r108  | 0 | 1 | -1.88615    | 0.545694  | 0.0803031 | No change |
| NM_020503 | Tas2r119  | 0 | 1 | 0.113855    | 0         | 0         | No change |
| NM_020509 | Retnla    | 0 | 1 | 0.00693961  | 1.51506   | 1.44062   | No change |
| NM_020510 | Fzd2      | 0 | 1 | 0.54012     | 0.595502  | 0.831097  | No change |
| NM_020514 | Olfir1509 | 0 | 1 | -2.88615    | 0.48302   | 0         | No change |
| NM_020515 | Olfir140  | 0 | 1 | 0.113855    | 0         | 0         | No change |
| NM_020516 | Slc16a8   | 0 | 1 | -1.10854    | 0.233477  | 0.0801686 | No change |
| NM_020517 | Lenep     | 0 | 1 | 0.313164    | 2.7126    | 3.22415   | No change |
| NM_020518 | Vsig2     | 0 | 1 | -0.301183   | 0.893499  | 0.674958  | No change |
| NM_020519 | Slurp1    | 0 | 1 | 0.113855    | 0         | 0         | No change |
| NM_020520 | Slc25a20  | 0 | 1 | -0.00519786 | 7.85658   | 7.44887   | No change |
| NM_020563 | Apbh      | 0 | 1 | 0.113855    | 0         | 0         | No change |
| NM_020565 | Sult3a1   | 0 | 1 | 0.113855    | 0         | 0         | No change |
| NM_020566 | Dnajc4    | 0 | 1 | -0.257626   | 28.7898   | 22.9047   | No change |
| NM_020576 | Psors1c2  | 0 | 1 | -2.47111    | 0.413363  | 0         | No change |
| NM_020577 | As3mt     | 0 | 1 | 0.00321075  | 5.89067   | 5.617     | No change |
| NM_020580 | Th1l      | 0 | 1 | -0.354989   | 5.25984   | 3.90613   | No change |
| NM_020587 | Srsf4     | 0 | 1 | -0.199148   | 8.68843   | 7.19821   | No change |
| NM_020594 | Zc3h8     | 0 | 1 | -0.425511   | 4.80334   | 3.39026   | No change |
| NM_020595 | Otor      | 0 | 1 | -0.886145   | 0.076084  | 0         | No change |
| NM_020597 | Msemb     | 0 | 1 | -0.471108   | 0.267535  | 0.137795  | No change |
| NM_020598 | Olfir17   | 0 | 1 | 0.113855    | 0         | 0         | No change |
| NM_020603 | Wdr46     | 0 | 1 | -0.193327   | 2.3188    | 1.92416   | No change |
| NM_020618 | Smarce1   | 0 | 1 | 0.00556321  | 11.5359   | 11.0221   | No change |
| NM_020621 | P2ry4     | 0 | 1 | 0.113855    | 0         | 0         | No change |
| NM_020623 | Pth       | 0 | 1 | -2.6935     | 0.583205  | 0         | No change |
| NM_020626 | Tmem27    | 0 | 1 | 1.43578     | 0.0552242 | 0.227547  | No change |
| NM_021272 | Fabp7     | 0 | 1 | -0.886145   | 0.0914605 | 0         | No change |
| NM_021274 | Cxcl10    | 0 | 1 | -0.808143   | 2.29469   | 1.21565   | No change |
| NM_021275 | Kcna4     | 0 | 1 | -1.47111    | 0.028775  | 0         | No change |

|           |               |   |   |             |           |           |           |
|-----------|---------------|---|---|-------------|-----------|-----------|-----------|
| NM_021279 | Wnt1          | 0 | 1 | -1.47111    | 0.0587878 | 0         | No change |
| NM_021282 | Cyp2e1        | 0 | 1 | -0.840341   | 1.20437   | 0.620314  | No change |
| NM_021283 | Il4           | 0 | 1 | -0.886145   | 0.119133  | 0         | No change |
| NM_021288 | Tyms          | 0 | 1 | 0.239386    | 1.39459   | 1.56889   | No change |
| NM_021289 | Smr2          | 0 | 1 | 0.113855    | 0         | 0         | No change |
| NM_021290 | Ucn           | 0 | 1 | -0.886145   | 0.108219  | 0         | No change |
| NM_021292 | Evc           | 0 | 1 | 0.421036    | 0.937428  | 1.19874   | No change |
| NM_021300 | Rhox4b        | 0 | 1 | -0.886145   | 0.0786602 | 0         | No change |
| NM_021306 | Ecel1         | 0 | 1 | -2.20807    | 0.103325  | 0         | No change |
| NM_021315 | Noc3l         | 0 | 1 | -0.00279011 | 5.39739   | 5.12664   | No change |
| NM_021316 | Cend1         | 0 | 1 | -1.88615    | 0.294418  | 0.0433259 | No change |
| NM_021319 | Pglyrp2       | 0 | 1 | -0.538222   | 0.337006  | 0.208291  | No change |
| NM_021320 | Ntn4          | 0 | 1 | 0.368428    | 1.61875   | 1.99502   | No change |
| NM_021325 | Cd200r1       | 0 | 1 | -0.248715   | 0.294841  | 0.227787  | No change |
| NM_021331 | G6pc2         | 0 | 1 | -0.886145   | 0.0346386 | 0         | No change |
| NM_021332 | Glp1r         | 0 | 1 | 0.113855    | 0         | 0         | No change |
| NM_021335 | Snrpb2        | 0 | 1 | -0.0632494  | 15.6384   | 14.2415   | No change |
| NM_021336 | Snrpa1        | 0 | 1 | -0.487596   | 4.85063   | 3.27367   | No change |
| NM_021340 | Rgr           | 0 | 1 | 0.113855    | 0         | 0         | No change |
| NM_021342 | Kcne4         | 0 | 1 | 0.435783    | 2.57493   | 3.32285   | No change |
| NM_021349 | Tnfrsf13b     | 0 | 1 | -0.886145   | 0.0929239 | 0         | No change |
| NM_021354 | Drg2          | 0 | 1 | 0.273431    | 6.9164    | 7.9628    | No change |
| NM_021358 | Htr6          | 0 | 1 | -0.471108   | 0.102339  | 0.05271   | No change |
| NM_021361 | Nova1         | 0 | 1 | -0.216294   | 0.428114  | 0.348699  | No change |
| NM_021363 | Svs3a         | 0 | 1 | 0.113855    | 0         | 0         | No change |
| NM_021367 | Tslp          | 0 | 1 | -0.886145   | 0.67663   | 0.316818  | No change |
| NM_021368 | Olfrl264      | 0 | 1 | 0.113855    | 0         | 0         | No change |
| NM_021369 | Chrna6        | 0 | 1 | 0.113855    | 0         | 0         | No change |
| NM_021370 | Accn5         | 0 | 1 | 0.113855    | 0         | 0         | No change |
| NM_021371 | Caln1         | 0 | 1 | -1.88615    | 0.189899  | 0.0279451 | No change |
| NM_021377 | Sorcs1        | 0 | 1 | 1.69882     | 0         | 0.0199253 | No change |
| NM_021378 | Klrc3         | 0 | 1 | 0.113855    | 0         | 0         | No change |
| NM_021380 | Il20          | 0 | 1 | -0.886145   | 0.0845788 | 0         | No change |
| NM_021382 | Tacr3         | 0 | 1 | 2.11385     | 0.0185157 | 0.133511  | No change |
| NM_021384 | Rsad2         | 0 | 1 | 0.517211    | 1.12319   | 1.53635   | No change |
| NM_021387 | Vstm2b        | 0 | 1 | 0.113855    | 0.191596  | 0.197363  | No change |
| NM_021390 | Sall1         | 0 | 1 | -0.54911    | 0.238674  | 0.150247  | No change |
| NM_021391 | Ppp1r1a       | 0 | 1 | 0.113855    | 0         | 0         | No change |
| NM_021393 | Cobra1        | 0 | 1 | 0.201762    | 10.0694   | 11.0259   | No change |
| NM_021396 | Pdcd1lg2      | 0 | 1 | -1.34558    | 0.204079  | 0.0630667 | No change |
| NM_021398 | Slc43a3       | 0 | 1 | 0.0790894   | 2.23254   | 2.24433   | No change |
| NM_021403 | Srrm3         | 0 | 1 | -0.886145   | 0.0177246 | 0         | No change |
| NM_021405 | Cst10         | 0 | 1 | 0.113855    | 0         | 0         | No change |
| NM_021407 | Trem3         | 0 | 1 | 0.113855    | 0         | 0         | No change |
| NM_021409 | Pard6b        | 0 | 1 | 0.147022    | 1.74284   | 1.83754   | No change |
| NM_021419 | Rnf8          | 0 | 1 | -0.183277   | 9.36788   | 7.84717   | No change |
| NM_021420 | Stk4          | 0 | 1 | 0.0376926   | 12.2624   | 11.9813   | No change |
| NM_021423 | Shank3        | 0 | 1 | 0.528892    | 0.166168  | 0.231584  | No change |
| NM_021424 | Pvrl1         | 0 | 1 | -0.363467   | 0.963941  | 0.709257  | No change |
| NM_021427 | Fam181b       | 0 | 1 | -0.14918    | 0.189075  | 0.155813  | No change |
| NM_021428 | Dexi          | 0 | 1 | 0.252683    | 4.91714   | 5.58202   | No change |
| NM_021432 | Nap1l5        | 0 | 1 | 0.751285    | 0.294374  | 0.492757  | No change |
| NM_021434 | Gpr180        | 0 | 1 | 0.00321075  | 7.19458   | 6.86219   | No change |
| NM_021437 | 1700123O20Rik | 0 | 1 | 0.21369     | 11.8061   | 13.0356   | No change |
| NM_021438 | Fibp          | 0 | 1 | 0.163608    | 7.33268   | 7.8208    | No change |
| NM_021439 | Chst11        | 0 | 1 | 0.373241    | 0.820808  | 1.01462   | No change |
| NM_021442 | Mecom         | 0 | 1 | 0.85082     | 0.129661  | 0.267129  | No change |
| NM_021443 | Ccl8          | 0 | 1 | 0.0297905   | 7.09204   | 6.88407   | No change |
| NM_021445 | Cts6          | 0 | 1 | 0.113855    | 0         | 0         | No change |
| NM_021453 | Pga5          | 0 | 1 | 0.113855    | 0         | 0         | No change |
| NM_021456 | Ces1g         | 0 | 1 | -1.88615    | 0.0913407 | 0         | No change |
| NM_021459 | Isl1          | 0 | 1 | -0.471108   | 0.0551805 | 0.0284208 | No change |
| NM_021461 | Mknk1         | 0 | 1 | -0.159469   | 5.47927   | 4.66512   | No change |
| NM_021463 | Prps1         | 0 | 1 | 0.201318    | 4.48152   | 4.90723   | No change |
| NM_021476 | Cysl1r1       | 0 | 1 | 0.85082     | 0.506122  | 0.886308  | No change |
| NM_021477 | Rbfox1        | 0 | 1 | 0.791927    | 0.0537443 | 0.0968839 | No change |
| NM_021478 | Tulp1         | 0 | 1 | -0.208073   | 0.138831  | 0.107257  | No change |
| NM_021481 | Treh          | 0 | 1 | 1.11385     | 0         | 0.0351572 | No change |
| NM_021487 | Kcne1l        | 0 | 1 | 0.113855    | 0.0963941 | 0.099296  | No change |
| NM_021500 | Maea          | 0 | 1 | -0.0616166  | 27.7069   | 25.2685   | No change |
| NM_021502 | Trappc2l      | 0 | 1 | -0.310401   | 17.8231   | 13.6521   | No change |
| NM_021503 | Myoz2         | 0 | 1 | 0.113855    | 0.302224  | 0.311323  | No change |
| NM_021508 | Myoz1         | 0 | 1 | 0.113855    | 0.215434  | 0.22192   | No change |
| NM_021509 | Moxd1         | 0 | 1 | -0.127153   | 0.565139  | 0.489008  | No change |
| NM_021510 | Hnrmp1        | 0 | 1 | 0.059116    | 59.6742   | 59.1808   | No change |
| NM_021511 | Rrs1          | 0 | 1 | 0.142855    | 6.66983   | 7.01084   | No change |

|           |               |   |   |             |           |           |           |
|-----------|---------------|---|---|-------------|-----------|-----------|-----------|
| NM_021519 | Edf1          | 0 | 1 | -0.0853541  | 55.6293   | 49.8996   | No change |
| NM_021521 | Med12         | 0 | 1 | 0.265858    | 2.36793   | 2.71118   | No change |
| NM_021528 | Chst12        | 0 | 1 | 0.637417    | 1.20968   | 1.80884   | No change |
| NM_021531 | Carm1         | 0 | 1 | 0.163767    | 16.5894   | 17.6912   | No change |
| NM_021541 | Cryba2        | 0 | 1 | -1.76061    | 0.992777  | 0.204533  | No change |
| NM_021545 | Naip7         | 0 | 1 | 0.331446    | 1.22344   | 1.46785   | No change |
| NM_021549 | Pnkp          | 0 | 1 | 0.167097    | 4.38279   | 4.68574   | No change |
| NM_021556 | Mrps30        | 0 | 1 | -0.282074   | 12.01     | 9.39152   | No change |
| NM_021562 | Tas2r140      | 0 | 1 | -1.88615    | 0.222661  | 0         | No change |
| NM_021600 | Chrnd         | 0 | 1 | 0.113855    | 0         | 0         | No change |
| NM_021608 | Dctn5         | 0 | 1 | -0.0398854  | 12.5556   | 11.6215   | No change |
| NM_021609 | Ccbp2         | 0 | 1 | -0.471108   | 0.200267  | 0.128935  | No change |
| NM_021712 | Slc18a3       | 0 | 1 | -3.05607    | 0.230963  | 0         | No change |
| NM_021715 | Chst7         | 0 | 1 | -0.371572   | 0.190505  | 0.130826  | No change |
| NM_021718 | Ms4a4b        | 0 | 1 | -0.6935     | 1.49579   | 0.856013  | No change |
| NM_021719 | Cldn15        | 0 | 1 | -0.985681   | 0.527121  | 0.23271   | No change |
| NM_021782 | Il21          | 0 | 1 | -2.6935     | 0.136119  | 0         | No change |
| NM_021791 | Doc2g         | 0 | 1 | -0.208073   | 0.947864  | 0.770841  | No change |
| NM_021876 | Eed           | 0 | 1 | -0.0748646  | 12.3823   | 11.1868   | No change |
| NM_021877 | Hr            | 0 | 1 | -0.0925961  | 1.13167   | 1.00856   | No change |
| NM_021884 | Tsg101        | 0 | 1 | 0.189188    | 20.5427   | 22.2975   | No change |
| NM_021888 | Qtrt1         | 0 | 1 | -0.0737722  | 2.11031   | 1.90211   | No change |
| NM_021892 | Npvf          | 0 | 1 | 0.113855    | 0         | 0         | No change |
| NM_021893 | Cd274         | 0 | 1 | 0.611354    | 0.632179  | 0.927481  | No change |
| NM_021896 | Gucy1a3       | 0 | 1 | -0.115086   | 2.7404    | 2.4064    | No change |
| NM_021901 | Tlx1          | 0 | 1 | -2.47111    | 0.171657  | 0         | No change |
| NM_022007 | Fxyd7         | 0 | 1 | -1.05607    | 0.822336  | 0.317659  | No change |
| NM_022012 | Map3k11       | 0 | 1 | -0.0227501  | 5.86425   | 5.49334   | No change |
| NM_022015 | Taf8          | 0 | 1 | 0.252017    | 4.96553   | 5.63168   | No change |
| NM_022016 | Impg1         | 0 | 1 | -0.886145   | 0.0582879 | 0.0200142 | No change |
| NM_022017 | Trpv4         | 0 | 1 | -0.314988   | 1.49064   | 1.13495   | No change |
| NM_022020 | Rbp7          | 0 | 1 | 0.376889    | 0.469313  | 0.604301  | No change |
| NM_022023 | Gmfb          | 0 | 1 | -0.0208808  | 36.5257   | 34.269    | No change |
| NM_022025 | Slc5a7        | 0 | 1 | 0.113855    | 0         | 0         | No change |
| NM_022030 | Sv2a          | 0 | 1 | 0.336247    | 0.302471  | 0.366561  | No change |
| NM_022312 | Tnr           | 0 | 1 | 0.528892    | 0.0258361 | 0.0399208 | No change |
| NM_022313 | Eral1         | 0 | 1 | -0.0361706  | 5.57128   | 5.16866   | No change |
| NM_022319 | Clstn2        | 0 | 1 | 0.3065      | 0.20823   | 0.247498  | No change |
| NM_022322 | Tnmd          | 0 | 1 | 1.11385     | 0.0525984 | 0.162546  | No change |
| NM_022326 | Ctsm          | 0 | 1 | 0.113855    | 0         | 0         | No change |
| NM_022327 | Ralb          | 0 | 1 | 0.0640357   | 11.692    | 11.6341   | No change |
| NM_022331 | Herpud1       | 0 | 1 | 0.126064    | 39.4095   | 40.9412   | No change |
| NM_022378 | Foxb1         | 0 | 1 | 0.113855    | 0         | 0         | No change |
| NM_022409 | Zfp296        | 0 | 1 | -0.798682   | 1.41208   | 0.750755  | No change |
| NM_022411 | Slc13a2       | 0 | 1 | 0.399257    | 0.986071  | 1.24512   | No change |
| NM_022414 | Ngb           | 0 | 1 | -1.14918    | 0.474395  | 0.1777    | No change |
| NM_022418 | Tmub1         | 0 | 1 | 0.476425    | 4.01262   | 5.32994   | No change |
| NM_022422 | Gng13         | 0 | 1 | -0.371572   | 1.01004   | 0.693633  | No change |
| NM_022424 | Fndc4         | 0 | 1 | 0.113855    | 0.828947  | 0.853901  | No change |
| NM_022427 | Gpr88         | 0 | 1 | -0.65168    | 0.323214  | 0.187281  | No change |
| NM_022428 | Irx6          | 0 | 1 | -1.47111    | 0.0585655 | 0         | No change |
| NM_022430 | Ms4a8a        | 0 | 1 | -0.886145   | 0.0644112 | 0         | No change |
| NM_022435 | Sp5           | 0 | 1 | 1.43578     | 0.166173  | 0.479291  | No change |
| NM_022654 | Lrdd          | 0 | 1 | -0.345577   | 1.03338   | 0.767421  | No change |
| NM_022657 | Fgf23         | 0 | 1 | 0.113855    | 0         | 0         | No change |
| NM_022811 | Polr1e        | 0 | 1 | 0.154497    | 1.63343   | 1.73137   | No change |
| NM_022813 | Scamp2        | 0 | 1 | -0.088104   | 19.789    | 17.7178   | No change |
| NM_022879 | Myl7          | 0 | 1 | 1.11385     | 0         | 0.12168   | No change |
| NM_022881 | Rgs18         | 0 | 1 | -2.88615    | 0.262426  | 0         | No change |
| NM_022888 | Folr4         | 0 | 1 | 0.599282    | 0.212803  | 0.328814  | No change |
| NM_022889 | Pes1          | 0 | 1 | -0.00890508 | 7.90061   | 7.47257   | No change |
| NM_022982 | Rtn4r         | 0 | 1 | 2.11385     | 0.0371894 | 0.268163  | No change |
| NM_022985 | Zfand6        | 0 | 1 | -0.0921318  | 50.189    | 44.8152   | No change |
| NM_022999 | Prrg2         | 0 | 1 | 0.216338    | 8.67814   | 9.60156   | No change |
| NM_023044 | Slc15a3       | 0 | 1 | -0.371572   | 0.594396  | 0.428603  | No change |
| NM_023049 | Asb2          | 0 | 1 | -0.0560702  | 2.30583   | 2.10836   | No change |
| NM_023052 | Ccl21c        | 0 | 1 | 0.279278    | 8.52071   | 9.85366   | No change |
| NM_023057 | B230120H23Rik | 0 | 1 | 0.440665    | 1.21241   | 1.57191   | No change |
| NM_023114 | Apoc3         | 0 | 1 | -0.471108   | 0.266004  | 0.137006  | No change |
| NM_023116 | Cacnb2        | 0 | 1 | 0.277354    | 0.563175  | 0.652645  | No change |
| NM_023124 | H2-Q8         | 0 | 1 | -0.623111   | 1.70845   | 1.03165   | No change |
| NM_023131 | Rce1          | 0 | 1 | 0.183117    | 11.7119   | 12.6602   | No change |
| NM_023134 | Sftpa1        | 0 | 1 | -1.47111    | 0.0502291 | 0         | No change |
| NM_023137 | Ubd           | 0 | 1 | -0.886145   | 0.371894  | 0.153236  | No change |
| NM_023138 | Map2k2        | 0 | 1 | -0.0386212  | 9.92676   | 9.19699   | No change |
| NM_023141 | Tor3a         | 0 | 1 | 0.209274    | 2.4738    | 2.72401   | No change |

|           |               |   |   |            |           |           |           |
|-----------|---------------|---|---|------------|-----------|-----------|-----------|
| NM_023143 | C1ra          | 0 | 1 | 0.0756716  | 6.73715   | 6.75802   | No change |
| NM_023153 | Cwc15         | 0 | 1 | 0.237976   | 15.4268   | 17.3246   | No change |
| NM_023154 | Ethe1         | 0 | 1 | 0.485824   | 0.751406  | 1.01591   | No change |
| NM_023167 | Mrpl4         | 0 | 1 | 0.037906   | 6.28157   | 6.13598   | No change |
| NM_023182 | Ctrl          | 0 | 1 | -0.208073  | 0.313932  | 0.242537  | No change |
| NM_023215 | 2500003M10Rik | 0 | 1 | -0.0456955 | 27.86     | 25.6917   | No change |
| NM_023256 | Krt20         | 0 | 1 | 1.43578    | 0.0361103 | 0.14879   | No change |
| NM_023260 | Mrps34        | 0 | 1 | 0.336247   | 12.9607   | 15.5894   | No change |
| NM_023289 | Ceacam11      | 0 | 1 | 0.113855   | 0         | 0         | No change |
| NM_023292 | Pus3          | 0 | 1 | 0.0302682  | 10.4262   | 10.1335   | No change |
| NM_023304 | Fgf22         | 0 | 1 | 1.69882    | 0         | 0.293624  | No change |
| NM_023312 | Ndufa13       | 0 | 1 | -0.0510481 | 77.9512   | 71.6185   | No change |
| NM_023331 | Mrpl46        | 0 | 1 | -0.118979  | 14.0199   | 12.2791   | No change |
| NM_023332 | Prf8a9        | 0 | 1 | 0.113855   | 0         | 0         | No change |
| NM_023333 | 2210010C04Rik | 0 | 1 | 0.113855   | 0         | 0         | No change |
| NM_023348 | Snap29        | 0 | 1 | -0.157085  | 11.1281   | 9.49682   | No change |
| NM_023371 | Pin1          | 0 | 1 | 0.134794   | 6.24089   | 6.52302   | No change |
| NM_023374 | Sdhd          | 0 | 1 | -0.0279779 | 17.2771   | 16.1245   | No change |
| NM_023377 | Stard5        | 0 | 1 | 0.255583   | 4.42586   | 5.03277   | No change |
| NM_023380 | Samsn1        | 0 | 1 | 0.196317   | 0.604383  | 0.661489  | No change |
| NM_023383 | Aadac         | 0 | 1 | 0.435783   | 0.37701   | 0.499319  | No change |
| NM_023386 | Rtp4          | 0 | 1 | 0.0107613  | 2.52543   | 2.41889   | No change |
| NM_023395 | Wfdc1         | 0 | 1 | -0.35563   | 4.23285   | 3.13203   | No change |
| NM_023438 | Tmem132e      | 0 | 1 | -1.6935    | 0.101865  | 0.0174887 | No change |
| NM_023449 | Slc9a3r2      | 0 | 1 | 0.495284   | 3.09655   | 4.16796   | No change |
| NM_023472 | Ankra2        | 0 | 1 | 0.319603   | 5.41614   | 6.44068   | No change |
| NM_023475 | Serhl         | 0 | 1 | 0.216283   | 15.1928   | 16.8055   | No change |
| NM_023478 | Upk3a         | 0 | 1 | 1.25136    | 0.252054  | 0.649105  | No change |
| NM_023479 | Elac2         | 0 | 1 | -0.268393  | 2.88194   | 2.2717    | No change |
| NM_023480 | Fahd1         | 0 | 1 | 0.0637313  | 10.1047   | 10.0518   | No change |
| NM_023504 | Nkx2-4        | 0 | 1 | -0.886145  | 0.0654394 | 0         | No change |
| NM_023511 | Krtap3-1      | 0 | 1 | 0.113855   | 0         | 0         | No change |
| NM_023514 | Mrps9         | 0 | 1 | -0.0537451 | 7.56357   | 6.93119   | No change |
| NM_023524 | Tfpt          | 0 | 1 | 0.1028     | 8.30438   | 8.48858   | No change |
| NM_023529 | Ms4a10        | 0 | 1 | -2.6935    | 0.414428  | 0         | No change |
| NM_023530 | Pla2g12b      | 0 | 1 | 2.43578    | 0         | 0.269385  | No change |
| NM_023537 | Rab3b         | 0 | 1 | 0.476425   | 0.419837  | 0.562218  | No change |
| NM_023538 | Agk           | 0 | 1 | -0.266176  | 2.94433   | 2.32312   | No change |
| NM_023547 | Ino80b        | 0 | 1 | 0.0119752  | 11.7498   | 11.2735   | No change |
| NM_023554 | Nol7          | 0 | 1 | -0.0762481 | 9.31292   | 8.40402   | No change |
| NM_023565 | Cse1l         | 0 | 1 | 0.0331568  | 12.0667   | 11.7527   | No change |
| NM_023566 | Muc2          | 0 | 1 | -0.371572  | 0.139407  | 0.0994182 | No change |
| NM_023608 | Gdpd2         | 0 | 1 | 0.28378    | 0.187996  | 0.221321  | No change |
| NM_023612 | Esm1          | 0 | 1 | 1.02075    | 0.497097  | 0.989985  | No change |
| NM_023623 | Cyp2d40       | 0 | 1 | 0.113855   | 0         | 0         | No change |
| NM_023626 | Ing3          | 0 | 1 | -0.0877791 | 2.96961   | 2.65751   | No change |
| NM_023631 | Aox4          | 0 | 1 | -2.6935    | 0.0841025 | 0         | No change |
| NM_023633 | 2410016O06Rik | 0 | 1 | -0.0594768 | 3.11925   | 2.84593   | No change |
| NM_023637 | Sars2         | 0 | 1 | -0.379185  | 1.35007   | 0.977259  | No change |
| NM_023653 | Wnt2          | 0 | 1 | -0.927965  | 1.12036   | 0.5431    | No change |
| NM_023655 | Trim29        | 0 | 1 | 0.36077    | 1.82236   | 2.23237   | No change |
| NM_023671 | Clns1a        | 0 | 1 | 0.262718   | 13.245    | 15.1322   | No change |
| NM_023672 | Ssbp3         | 0 | 1 | -0.19583   | 1.89774   | 1.57289   | No change |
| NM_023680 | Tnfrsf22      | 0 | 1 | -0.471108  | 0.153171  | 0.0946694 | No change |
| NM_023684 | Lime1         | 0 | 1 | 0.324329   | 6.7594    | 8.06228   | No change |
| NM_023689 | Spock3        | 0 | 1 | -0.886145  | 0.0224165 | 0         | No change |
| NM_023695 | Crybb1        | 0 | 1 | 0.726832   | 1.2773    | 2.05587   | No change |
| NM_023697 | Rdh14         | 0 | 1 | -0.139594  | 8.47489   | 7.31566   | No change |
| NM_023707 | 1810009J06Rik | 0 | 1 | 0.113855   | 0         | 0         | No change |
| NM_023709 | Capn9         | 0 | 1 | -1.47111   | 0.0598223 | 0         | No change |
| NM_023734 | Pi16          | 0 | 1 | -0.122213  | 1.61427   | 1.40704   | No change |
| NM_023738 | Uba7          | 0 | 1 | 0.347527   | 1.98367   | 2.40665   | No change |
| NM_023741 | Prf8a8        | 0 | 1 | 0.113855   | 0         | 0         | No change |
| NM_023746 | Prf5a1        | 0 | 1 | 0.113855   | 0         | 0         | No change |
| NM_023784 | Yipf7         | 0 | 1 | -2.47111   | 0.285861  | 0         | No change |
| NM_023785 | Pbbp          | 0 | 1 | 0.113855   | 0.0645305 | 0.0664731 | No change |
| NM_023824 | Paqr4         | 0 | 1 | 0.323308   | 3.53052   | 4.20952   | No change |
| NM_023844 | Jam2          | 0 | 1 | 0.150381   | 3.37107   | 3.56198   | No change |
| NM_023860 | Krtap5-3      | 0 | 1 | 0.113855   | 0         | 0         | No change |
| NM_023868 | Ryr2          | 0 | 1 | 0.0632287  | 0.116065  | 0.115289  | No change |
| NM_023876 | Elp4          | 0 | 1 | 0.152674   | 3.91152   | 4.13966   | No change |
| NM_023881 | Retnlb        | 0 | 1 | -1.47111   | 0.200267  | 0         | No change |
| NM_023892 | Icam4         | 0 | 1 | 0.113855   | 0.076839  | 0.0791521 | No change |
| NM_023894 | Rhox9         | 0 | 1 | -0.886145  | 0.0790169 | 0         | No change |
| NM_023900 | Plekhj1       | 0 | 1 | 0.210259   | 13.5514   | 14.928    | No change |
| NM_023903 | Lipm          | 0 | 1 | 0.891462   | 0.154816  | 0.292373  | No change |

|           |               |   |   |             |           |           |           |
|-----------|---------------|---|---|-------------|-----------|-----------|-----------|
| NM_023906 | Asb3          | 0 | 1 | -0.0814015  | 5.10001   | 4.58572   | No change |
| NM_024170 | Cxx1a         | 0 | 1 | 0.0555562   | 5.46611   | 5.40544   | No change |
| NM_024174 | Mrps23        | 0 | 1 | 0.287306    | 12.0972   | 14.0604   | No change |
| NM_024185 | Fam188a       | 0 | 1 | 0.124347    | 12.2478   | 12.7088   | No change |
| NM_024194 | Lrrc40        | 0 | 1 | 0.0347109   | 4.76882   | 4.64922   | No change |
| NM_024195 | Cyb5r4        | 0 | 1 | -0.229153   | 7.74071   | 6.28069   | No change |
| NM_024203 | Fam120b       | 0 | 1 | -0.132266   | 13.0626   | 11.3429   | No change |
| NM_024208 | Echdc3        | 0 | 1 | 0.321796    | 4.92312   | 5.86372   | No change |
| NM_024215 | Zfp593        | 0 | 1 | 0.143299    | 3.38589   | 3.56048   | No change |
| NM_024216 | Gpn3          | 0 | 1 | 0.416924    | 3.77793   | 4.81337   | No change |
| NM_024217 | Cmtm3         | 0 | 1 | -0.0436865  | 2.45823   | 2.26568   | No change |
| NM_024228 | Gdpd3         | 0 | 1 | -0.0381483  | 0.5873    | 0.53776   | No change |
| NM_024231 | Zfp1          | 0 | 1 | 0.168679    | 15.9831   | 17.1042   | No change |
| NM_024233 | Rexo2         | 0 | 1 | -0.0436865  | 30.0166   | 27.7147   | No change |
| NM_024240 | Gins4         | 0 | 1 | -0.152425   | 18.1386   | 15.5266   | No change |
| NM_024242 | Riok1         | 0 | 1 | 0.130065    | 4.4701    | 4.65699   | No change |
| NM_024246 | Tmem79        | 0 | 1 | 0.216948    | 3.99609   | 4.42358   | No change |
| NM_024248 | Cars2         | 0 | 1 | 0.24237     | 6.0275    | 6.79104   | No change |
| NM_024253 | Nkg7          | 0 | 1 | -0.886145   | 0.942955  | 0.441519  | No change |
| NM_024262 | 1200011M11Rik | 0 | 1 | 0.0700597   | 6.49112   | 6.48593   | No change |
| NM_024264 | Cyp27a1       | 0 | 1 | 0.28617     | 4.90432   | 5.6977    | No change |
| NM_024283 | 1500015O10Rik | 0 | 1 | 0.265858    | 0.627864  | 0.727611  | No change |
| NM_024285 | Bves          | 0 | 1 | 0.113855    | 0.346947  | 0.357391  | No change |
| NM_024286 | Popdc3        | 0 | 1 | -0.886145   | 0.112955  | 0.038785  | No change |
| NM_024290 | Tnfrsf23      | 0 | 1 | -0.400718   | 0.191056  | 0.131205  | No change |
| NM_024291 | Ky            | 0 | 1 | -2.20807    | 0.11511   | 0.0131751 | No change |
| NM_024406 | Fabp4         | 0 | 1 | -1.16625    | 1.73961   | 0.67199   | No change |
| NM_024413 | Plekhf1       | 0 | 1 | 0.0504294   | 4.11273   | 4.05234   | No change |
| NM_024414 | Stx1b         | 0 | 1 | 0.741886    | 0.442776  | 0.729768  | No change |
| NM_024435 | Nts           | 0 | 1 | -0.886145   | 0.0590618 | 0         | No change |
| NM_024438 | Dusp19        | 0 | 1 | -0.400718   | 7.57428   | 5.44689   | No change |
| NM_024439 | H47           | 0 | 1 | -0.0417644  | 33.7054   | 31.1637   | No change |
| NM_024444 | Cyp4f18       | 0 | 1 | 0.239386    | 0.409477  | 0.463984  | No change |
| NM_024448 | Rab12         | 0 | 1 | 0.254717    | 6.72658   | 7.64342   | No change |
| NM_024467 | Zfp319        | 0 | 1 | 0.00388197  | 1.83269   | 1.74801   | No change |
| NM_024470 | Klra23        | 0 | 1 | 0.698817    | 0.073984  | 0.152422  | No change |
| NM_024473 | BC005537      | 0 | 1 | -0.0708574  | 31.1173   | 28.1986   | No change |
| NM_024477 | Ttc28         | 0 | 1 | -0.183531   | 1.31228   | 1.09874   | No change |
| NM_025274 | Dppa5a        | 0 | 1 | -2.20807    | 0.436263  | 0         | No change |
| NM_025276 | Evgl          | 0 | 1 | -0.256983   | 0.806077  | 0.639588  | No change |
| NM_025280 | Kin           | 0 | 1 | 0.441909    | 4.7001    | 6.09104   | No change |
| NM_025285 | Stmn2         | 0 | 1 | 0.92121     | 0.10981   | 0.226232  | No change |
| NM_025288 | Stfa3         | 0 | 1 | 0.113855    | 0         | 0         | No change |
| NM_025292 | Synj2bp       | 0 | 1 | -0.0442374  | 7.4197    | 6.84907   | No change |
| NM_025297 | Mecr          | 0 | 1 | 0.225748    | 3.17971   | 3.54391   | No change |
| NM_025299 | Txn14a        | 0 | 1 | -0.0549643  | 2.77334   | 2.5394    | No change |
| NM_025315 | Med21         | 0 | 1 | -0.111112   | 16.6191   | 14.6343   | No change |
| NM_025316 | Ndufb5        | 0 | 1 | -0.0654689  | 26.7889   | 24.3615   | No change |
| NM_025319 | 0610009B22Rik | 0 | 1 | 0.0352144   | 32.9617   | 32.1479   | No change |
| NM_025324 | Zfp524        | 0 | 1 | 0.503267    | 4.41494   | 5.97717   | No change |
| NM_025325 | Haao          | 0 | 1 | 0.28378     | 0.398571  | 0.469222  | No change |
| NM_025330 | Hsd17b14      | 0 | 1 | -0.471108   | 0.102114  | 0.0525941 | No change |
| NM_025331 | Gng11         | 0 | 1 | 0.590293    | 1.83402   | 2.66211   | No change |
| NM_025347 | Ypel3         | 0 | 1 | 0.278914    | 11.9933   | 13.861    | No change |
| NM_025350 | Cpa1          | 0 | 1 | 0.113855    | 0         | 0         | No change |
| NM_025355 | Tceal6        | 0 | 1 | 0.631703    | 2.68771   | 3.99196   | No change |
| NM_025362 | Dnajc30       | 0 | 1 | 0.352862    | 6.60881   | 8.04554   | No change |
| NM_025363 | 1110001J03Rik | 0 | 1 | 0.352015    | 18.3319   | 22.3024   | No change |
| NM_025364 | Sarnp         | 0 | 1 | -0.122751   | 7.74366   | 6.75998   | No change |
| NM_025373 | 1110008L16Rik | 0 | 1 | 0.141336    | 4.62831   | 4.85977   | No change |
| NM_025375 | Wbscr22       | 0 | 1 | 0.180045    | 11.2958   | 12.1847   | No change |
| NM_025377 | Fam33a        | 0 | 1 | -0.138911   | 2.84145   | 2.44802   | No change |
| NM_025380 | Eef1e1        | 0 | 1 | 0.12793     | 6.77477   | 7.04781   | No change |
| NM_025382 | Tmem57        | 0 | 1 | 0.0999425   | 18.9724   | 19.3558   | No change |
| NM_025394 | Tomm7         | 0 | 1 | -0.00372732 | 68.1847   | 64.7349   | No change |
| NM_025396 | Pgls          | 0 | 1 | 0.140572    | 8.36631   | 8.78078   | No change |
| NM_025397 | Med11         | 0 | 1 | 0.329584    | 4.78208   | 5.73359   | No change |
| NM_025404 | Arl4d         | 0 | 1 | 0.0876233   | 5.54719   | 5.61029   | No change |
| NM_025411 | 1110049F12Rik | 0 | 1 | 0.0349471   | 28.0494   | 27.3534   | No change |
| NM_025413 | Lce1g         | 0 | 1 | 0.113855    | 0         | 0         | No change |
| NM_025416 | Them5         | 0 | 1 | 0.113855    | 0         | 0         | No change |
| NM_025419 | 1110059G10Rik | 0 | 1 | 0.227065    | 3.02742   | 3.37488   | No change |
| NM_025420 | Lce1m         | 0 | 1 | 0.113855    | 0         | 0         | No change |
| NM_025422 | Cd302         | 0 | 1 | -0.384951   | 7.15226   | 5.19728   | No change |
| NM_025423 | 1110059E24Rik | 0 | 1 | 0.230331    | 16.2031   | 18.0986   | No change |
| NM_025444 | Taf13         | 0 | 1 | 0.271396    | 14.0035   | 16.0959   | No change |



|           |               |   |   |             |           |           |           |
|-----------|---------------|---|---|-------------|-----------|-----------|-----------|
| NM_025447 | Dimt1         | 0 | 1 | 0.162764    | 2.35505   | 2.51057   | No change |
| NM_025449 | Nicn1         | 0 | 1 | -0.0256965  | 9.31228   | 8.70504   | No change |
| NM_025450 | Mrps17        | 0 | 1 | 0.159369    | 18.1225   | 19.2683   | No change |
| NM_025452 | Tmem54        | 0 | 1 | 0.265858    | 0.514339  | 0.596051  | No change |
| NM_025453 | Tm4sf20       | 0 | 1 | -0.175652   | 0.463692  | 0.382121  | No change |
| NM_025456 | Eapp          | 0 | 1 | -0.200405   | 34.4121   | 28.4961   | No change |
| NM_025459 | Fam134b       | 0 | 1 | -0.190606   | 19.7678   | 16.4797   | No change |
| NM_025463 | 1810009A15Rik | 0 | 1 | 0.0932935   | 23.9109   | 24.2805   | No change |
| NM_025465 | 1810029B16Rik | 0 | 1 | -0.351809   | 7.36644   | 5.4767    | No change |
| NM_025466 | Gkn1          | 0 | 1 | 0.113855    | 0         | 0         | No change |
| NM_025467 | Gkn2          | 0 | 1 | -0.886145   | 0.0896949 | 0         | No change |
| NM_025469 | Clps          | 0 | 1 | -2.6935     | 0.846473  | 0         | No change |
| NM_025470 | 1810030J14Rik | 0 | 1 | 0.113855    | 0         | 0         | No change |
| NM_025475 | Haus2         | 0 | 1 | 0.182386    | 5.43599   | 5.87353   | No change |
| NM_025479 | 2810021B07Rik | 0 | 1 | 0.154931    | 7.19882   | 7.63048   | No change |
| NM_025501 | Lce3b         | 0 | 1 | 0.113855    | 0         | 0         | No change |
| NM_025507 | Snw1          | 0 | 1 | 0.105795    | 44.3108   | 45.3902   | No change |
| NM_025508 | Gmpr          | 0 | 1 | -0.533843   | 2.06298   | 1.33973   | No change |
| NM_025518 | Dus2l         | 0 | 1 | 0.149924    | 2.92261   | 3.08778   | No change |
| NM_025524 | Krtap3-3      | 0 | 1 | 1.52889     | 0.476045  | 1.47113   | No change |
| NM_025525 | Rnf113a2      | 0 | 1 | -0.0646205  | 13.8476   | 12.5986   | No change |
| NM_025526 | Iscu          | 0 | 1 | -0.00823699 | 32.8429   | 31.0797   | No change |
| NM_025527 | Srp19         | 0 | 1 | 0.143602    | 19.0144   | 19.9966   | No change |
| NM_025531 | Slmo2         | 0 | 1 | 0.149834    | 19.8191   | 20.9326   | No change |
| NM_025532 | Prl2b1        | 0 | 1 | 0.113855    | 0         | 0         | No change |
| NM_025537 | Tsfm          | 0 | 1 | 0.223479    | 6.67398   | 7.42246   | No change |
| NM_025538 | Alkbh7        | 0 | 1 | -0.235479   | 6.85749   | 5.52829   | No change |
| NM_025540 | Sln           | 0 | 1 | -0.471108   | 0.26805   | 0.13806   | No change |
| NM_025544 | Mrps15        | 0 | 1 | 0.456743    | 6.01826   | 7.88323   | No change |
| NM_025548 | Tbcb          | 0 | 1 | 0.128627    | 34.5791   | 35.9873   | No change |
| NM_025553 | Mrpl11        | 0 | 1 | 0.143001    | 5.90044   | 6.20262   | No change |
| NM_025557 | Pcp4l1        | 0 | 1 | -0.301183   | 2.43372   | 1.86884   | No change |
| NM_025563 | 2010012O05Rik | 0 | 1 | 0.190476    | 3.49105   | 3.7941    | No change |
| NM_025564 | Magohb        | 0 | 1 | 0.0459507   | 7.82453   | 7.6852    | No change |
| NM_025569 | Mgst3         | 0 | 1 | 0.169998    | 13.7191   | 14.6974   | No change |
| NM_025583 | Ctrb1         | 0 | 1 | 1.69882     | 0         | 0.161874  | No change |
| NM_025587 | Rps21         | 0 | 1 | 0.320306    | 2.13891   | 2.57052   | No change |
| NM_025590 | Acot11        | 0 | 1 | 0.113855    | 0.762343  | 0.785293  | No change |
| NM_025599 | 2610528E23Rik | 0 | 1 | 0.445061    | 5.47545   | 7.11166   | No change |
| NM_025600 | Dda1          | 0 | 1 | 0.152125    | 11.3653   | 12.023    | No change |
| NM_025604 | Psmg3         | 0 | 1 | 0.286691    | 4.4856    | 5.21961   | No change |
| NM_025606 | Mrpl16        | 0 | 1 | 0.178625    | 12.0909   | 13.0297   | No change |
| NM_025614 | Rwdd1         | 0 | 1 | -0.00279011 | 19.8387   | 18.8435   | No change |
| NM_025615 | 2810004N23Rik | 0 | 1 | 0.224137    | 10.7414   | 11.9478   | No change |
| NM_025617 | 2210012G02Rik | 0 | 1 | -0.107703   | 3.20389   | 2.82886   | No change |
| NM_025620 | Rep15         | 0 | 1 | -0.127153   | 0.851645  | 0.731069  | No change |
| NM_025621 | 2310050C09Rik | 0 | 1 | 0.113855    | 0         | 0         | No change |
| NM_025622 | Lgals2        | 0 | 1 | -0.371572   | 0.706347  | 0.485074  | No change |
| NM_025630 | Aggf1         | 0 | 1 | 0.166825    | 13.3849   | 14.3043   | No change |
| NM_025633 | Metap1d       | 0 | 1 | 0.28378     | 3.04457   | 3.53538   | No change |
| NM_025634 | 2310042E22Rik | 0 | 1 | 0.113855    | 0         | 0         | No change |
| NM_025642 | 2610039C10Rik | 0 | 1 | -0.24124    | 5.84348   | 4.69403   | No change |
| NM_025645 | Snrnp40       | 0 | 1 | -0.191      | 9.17243   | 7.64022   | No change |
| NM_025648 | Farsa         | 0 | 1 | -0.243697   | 7.7733    | 6.24099   | No change |
| NM_025649 | Mad2l1bp      | 0 | 1 | -0.123474   | 9.69784   | 8.46592   | No change |
| NM_025652 | Gtf3a         | 0 | 1 | 0.0281249   | 5.53033   | 5.36496   | No change |
| NM_025653 | 3110001I22Rik | 0 | 1 | 0.233436    | 3.46085   | 3.87698   | No change |
| NM_025655 | Tmigd1        | 0 | 1 | 1.11385     | 0.510197  | 1.10367   | No change |
| NM_025656 | Sip1          | 0 | 1 | -0.6935     | 2.58355   | 1.49294   | No change |
| NM_025658 | Ms4a4d        | 0 | 1 | -0.0342438  | 1.90418   | 1.76535   | No change |
| NM_025665 | Snrnp27       | 0 | 1 | 0.0966181   | 35.0132   | 35.6379   | No change |
| NM_025671 | Ogfod2        | 0 | 1 | 0.120944    | 9.0943    | 9.41445   | No change |
| NM_025677 | Tsen15        | 0 | 1 | 0.350461    | 6.15662   | 7.48351   | No change |
| NM_025684 | Nepn          | 0 | 1 | -0.886145   | 0.114689  | 0.0393807 | No change |
| NM_025685 | Col27a1       | 0 | 1 | 0.0763801   | 1.059     | 1.06266   | No change |
| NM_025689 | Ccdc51        | 0 | 1 | 0.476425    | 2.00618   | 2.66558   | No change |
| NM_025696 | Sorcs3        | 0 | 1 | 0.476425    | 0.0742204 | 0.10194   | No change |
| NM_025700 | Pgm1          | 0 | 1 | 0.323308    | 0.992868  | 1.18772   | No change |
| NM_025710 | Uqcrrf1       | 0 | 1 | -0.147248   | 55.4146   | 47.6237   | No change |
| NM_025712 | Snx31         | 0 | 1 | -1.88615    | 0.181021  | 0.0266386 | No change |
| NM_025720 | Krtap3-2      | 0 | 1 | 0.476425    | 0.405585  | 0.557059  | No change |
| NM_025722 | 4921524J17Rik | 0 | 1 | -0.235479   | 8.08351   | 6.52645   | No change |
| NM_025730 | Lrrk2         | 0 | 1 | -0.0601746  | 1.85453   | 1.69228   | No change |
| NM_025736 | Ttc35         | 0 | 1 | 0.297977    | 10.6359   | 12.4553   | No change |
| NM_025757 | 4933439F18Rik | 0 | 1 | 0.0719587   | 8.83833   | 8.84334   | No change |
| NM_025773 | Ube2w         | 0 | 1 | 0.0705398   | 20.9908   | 20.9822   | No change |

|           |               |   |   |            |           |           |           |
|-----------|---------------|---|---|------------|-----------|-----------|-----------|
| NM_025776 | Rbm22         | 0 | 1 | 0.29492    | 5.73232   | 6.69911   | No change |
| NM_025777 | Duoxa2        | 0 | 1 | 0.113855   | 0         | 0         | No change |
| NM_025779 | Ccdc109b      | 0 | 1 | -0.345577  | 0.528778  | 0.381287  | No change |
| NM_025781 | Tmem170       | 0 | 1 | -0.238719  | 8.07046   | 6.50294   | No change |
| NM_025784 | Bcs1l         | 0 | 1 | 0.258245   | 2.85783   | 3.25787   | No change |
| NM_025807 | Slc16a9       | 0 | 1 | 0.0873826  | 1.05625   | 1.0679    | No change |
| NM_025808 | Lztr1         | 0 | 1 | 0.189686   | 7.04105   | 7.64569   | No change |
| NM_025816 | Tax1bp1       | 0 | 1 | -0.0847286 | 53.1186   | 47.6785   | No change |
| NM_025817 | Tril          | 0 | 1 | 0.60366    | 0.598334  | 0.870924  | No change |
| NM_025829 | Eif4e3        | 0 | 1 | 0.239386   | 1.49758   | 1.6855    | No change |
| NM_025832 | Naa16         | 0 | 1 | -0.258114  | 2.75175   | 2.18615   | No change |
| NM_025834 | Proz          | 0 | 1 | 0.265858   | 0.232504  | 0.269441  | No change |
| NM_025839 | Nudt16l1      | 0 | 1 | 0.108712   | 15.3171   | 15.7219   | No change |
| NM_025842 | Vps28         | 0 | 1 | -0.0848563 | 56.2268   | 50.4565   | No change |
| NM_025843 | Ndufb7        | 0 | 1 | 0.2305     | 37.1347   | 41.4852   | No change |
| NM_025849 | 3110001D03Rik | 0 | 1 | 0.216425   | 18.2437   | 20.185    | No change |
| NM_025859 | Arl1          | 0 | 1 | 0.143299   | 24.0035   | 25.2377   | No change |
| NM_025860 | Ddx18         | 0 | 1 | -0.219932  | 12.2714   | 10.0233   | No change |
| NM_025864 | Tmem206       | 0 | 1 | 0.168821   | 6.81346   | 7.2918    | No change |
| NM_025866 | Cdca7         | 0 | 1 | -0.103737  | 1.4464    | 1.27709   | No change |
| NM_025867 | Serpib1       | 0 | 1 | 0.113855   | 0         | 0         | No change |
| NM_025869 | Dusp26        | 0 | 1 | 0.113855   | 0.119679  | 0.123282  | No change |
| NM_025881 | Luc7l         | 0 | 1 | 0.169708   | 9.32251   | 9.98389   | No change |
| NM_025885 | Med19         | 0 | 1 | -0.0868425 | 15.6039   | 13.9816   | No change |
| NM_025888 | Kctd20        | 0 | 1 | -0.0555304 | 9.6699    | 8.85422   | No change |
| NM_025890 | 2410004A20Rik | 0 | 1 | -0.886145  | 0.124009  | 0.0425806 | No change |
| NM_025894 | Psmd12        | 0 | 1 | 0.125053   | 15.5323   | 16.1248   | No change |
| NM_025895 | Med28         | 0 | 1 | 0.0555562  | 12.3122   | 12.1799   | No change |
| NM_025896 | Prl3a1        | 0 | 1 | 0.113855   | 0         | 0         | No change |
| NM_025899 | Uqcrc2        | 0 | 1 | -0.0781234 | 22.8483   | 20.5989   | No change |
| NM_025903 | Ifrd2         | 0 | 1 | 0.326849   | 3.06227   | 3.66206   | No change |
| NM_025904 | 1600012F09Rik | 0 | 1 | 0.0440334  | 7.7076    | 7.56354   | No change |
| NM_025915 | Tmem88        | 0 | 1 | 0.00547865 | 6.63952   | 6.34116   | No change |
| NM_025927 | Mrpl45        | 0 | 1 | -0.110932  | 5.73368   | 5.04988   | No change |
| NM_025928 | Pmf1          | 0 | 1 | -0.41666   | 6.32295   | 4.48694   | No change |
| NM_025933 | Higd2a        | 0 | 1 | -0.0341212 | 36.0402   | 33.4946   | No change |
| NM_025935 | Tbc1d7        | 0 | 1 | -0.350651  | 11.2449   | 8.3767    | No change |
| NM_025957 | Ceacam14      | 0 | 1 | 0.113855   | 0         | 0         | No change |
| NM_025962 | Mmachc        | 0 | 1 | -0.101989  | 14.5164   | 12.8703   | No change |
| NM_025969 | 1700034H14Rik | 0 | 1 | -0.0158363 | 11.6597   | 10.9734   | No change |
| NM_025970 | Zbtb8os       | 0 | 1 | 0.435783   | 10.4539   | 13.488    | No change |
| NM_025973 | Pgc           | 0 | 1 | -0.886145  | 0.0503562 | 0         | No change |
| NM_025980 | Nrarp         | 0 | 1 | 0.00138008 | 1.05554   | 1.00368   | No change |
| NM_025984 | Lce1a1        | 0 | 1 | -3.05607   | 0.787491  | 0         | No change |
| NM_025989 | Gp2           | 0 | 1 | -0.886145  | 0.035234  | 0         | No change |
| NM_025990 | 2310021H06Rik | 0 | 1 | 0.113855   | 0         | 0         | No change |
| NM_025995 | Fbxo5         | 0 | 1 | -0.112916  | 2.08269   | 1.82755   | No change |
| NM_025996 | Tommm34       | 0 | 1 | 0.0884397  | 25.9872   | 26.3015   | No change |
| NM_025998 | Nkain1        | 0 | 1 | -0.754901  | 1.11967   | 0.618888  | No change |
| NM_026000 | Psmd9         | 0 | 1 | 0.119829   | 6.45554   | 6.67759   | No change |
| NM_026001 | Rnaseh2b      | 0 | 1 | -0.0787903 | 0.717498  | 0.640551  | No change |
| NM_026004 | Nt5c3         | 0 | 1 | 0.255707   | 11.2341   | 12.7724   | No change |
| NM_026006 | Sft2d3        | 0 | 1 | 0.314674   | 3.79467   | 4.49652   | No change |
| NM_026011 | Arl8b         | 0 | 1 | 0.0251455  | 32.7043   | 31.6783   | No change |
| NM_026014 | Cdt1          | 0 | 1 | -0.0116761 | 0.349896  | 0.327663  | No change |
| NM_026015 | Zmat5         | 0 | 1 | -0.208073  | 5.21151   | 4.27652   | No change |
| NM_026017 | Ctdnep1       | 0 | 1 | -0.146909  | 5.44071   | 4.67042   | No change |
| NM_026025 | Zcrb1         | 0 | 1 | -0.102957  | 25.3122   | 22.4238   | No change |
| NM_026031 | Utp11l        | 0 | 1 | 0.225646   | 15.3573   | 17.1003   | No change |
| NM_026032 | Lsm1          | 0 | 1 | 0.198517   | 5.34509   | 5.84062   | No change |
| NM_026035 | Mrpl55        | 0 | 1 | 0.104753   | 14.1173   | 14.4502   | No change |
| NM_026039 | Med18         | 0 | 1 | 0.370491   | 4.65451   | 5.73643   | No change |
| NM_026040 | Srfbp1        | 0 | 1 | 0.245766   | 4.43024   | 5.00525   | No change |
| NM_026041 | Rrp15         | 0 | 1 | -0.326187  | 11.0888   | 8.40422   | No change |
| NM_026043 | Rnpc3         | 0 | 1 | 0.18655    | 12.0311   | 13.0354   | No change |
| NM_026045 | Prpf18        | 0 | 1 | 0.0394049  | 13.7834   | 13.4832   | No change |
| NM_026058 | Lass4         | 0 | 1 | 0.454892   | 1.69102   | 2.21166   | No change |
| NM_026061 | Ndufb8        | 0 | 1 | -0.10679   | 119.489   | 105.614   | No change |
| NM_026066 | Cmtm5         | 0 | 1 | -0.886145  | 0.0783067 | 0         | No change |
| NM_026075 | Srek1ip1      | 0 | 1 | 0.138837   | 9.4135    | 9.86701   | No change |
| NM_026083 | Zc3h13        | 0 | 1 | 0.243138   | 3.61438   | 4.07333   | No change |
| NM_026085 | Pblid2        | 0 | 1 | -0.0512044 | 1.13476   | 1.03904   | No change |
| NM_026095 | Snrpd3        | 0 | 1 | -0.0740781 | 15.0001   | 13.55     | No change |
| NM_026109 | Tmed11        | 0 | 1 | -0.886145  | 0.0913407 | 0         | No change |
| NM_026110 | Gcfc1         | 0 | 1 | 0.137148   | 17.9676   | 18.81     | No change |
| NM_026115 | Hat1          | 0 | 1 | -0.118947  | 11.2322   | 9.83937   | No change |

|           |               |   |   |            |           |           |           |
|-----------|---------------|---|---|------------|-----------|-----------|-----------|
| NM_026116 | Bbs2          | 0 | 1 | 0.0212887  | 16.7197   | 16.1511   | No change |
| NM_026119 | Med4          | 0 | 1 | 0.0929458  | 14.8044   | 15.0299   | No change |
| NM_026120 | 2410127L17Rik | 0 | 1 | 0.128428   | 13.0799   | 13.6108   | No change |
| NM_026122 | Hmgn3         | 0 | 1 | 0.393009   | 6.73214   | 8.43209   | No change |
| NM_026138 | 6330407J23Rik | 0 | 1 | 1.69882    | 0         | 0.0363867 | No change |
| NM_026140 | Ears2         | 0 | 1 | 0.281799   | 6.07831   | 7.03909   | No change |
| NM_026146 | Eps81         | 0 | 1 | 0.489364   | 0.994824  | 1.3379    | No change |
| NM_026152 | Hoga1         | 0 | 1 | 0.528892   | 2.51491   | 3.4688    | No change |
| NM_026154 | Mrpl10        | 0 | 1 | 0.0950368  | 19.1428   | 19.463    | No change |
| NM_026157 | Mtpap         | 0 | 1 | 0.13786    | 7.80792   | 8.17838   | No change |
| NM_026159 | Retsat        | 0 | 1 | 0.301715   | 5.39698   | 6.33777   | No change |
| NM_026165 | Slc25a46      | 0 | 1 | -0.0403408 | 13.9832   | 12.9424   | No change |
| NM_026167 | Kihl13        | 0 | 1 | 0.179443   | 0.908474  | 0.980386  | No change |
| NM_026171 | Nvl           | 0 | 1 | -0.107075  | 11.2055   | 9.90059   | No change |
| NM_026174 | Entpd4        | 0 | 1 | -0.101401  | 31.1178   | 27.6083   | No change |
| NM_026181 | Gpatch1       | 0 | 1 | -0.065593  | 3.87563   | 3.52262   | No change |
| NM_026183 | Slc47a1       | 0 | 1 | 0.628428   | 0.529179  | 0.790409  | No change |
| NM_026186 | Cwc25         | 0 | 1 | 0.241345   | 3.85661   | 4.34176   | No change |
| NM_026187 | Ankzf1        | 0 | 1 | -0.124151  | 12.0821   | 10.5491   | No change |
| NM_026194 | 1810074P20Rik | 0 | 1 | 0.0675757  | 17.2986   | 17.2563   | No change |
| NM_026197 | Mettl16       | 0 | 1 | 0.0182026  | 6.76929   | 6.52405   | No change |
| NM_026206 | Pr17c1        | 0 | 1 | 0.113855   | 0         | 0         | No change |
| NM_026214 | Kctd4         | 0 | 1 | 0.385157   | 1.31758   | 1.64298   | No change |
| NM_026217 | Atg12         | 0 | 1 | 0.0972979  | 26.9319   | 27.4258   | No change |
| NM_026234 | Pigm          | 0 | 1 | 0.0765095  | 5.3957    | 5.41586   | No change |
| NM_026238 | Narfl         | 0 | 1 | -0.301183  | 6.1919    | 4.7767    | No change |
| NM_026240 | Gramd3        | 0 | 1 | 0.0161581  | 4.46784   | 4.29919   | No change |
| NM_026241 | Ankrd39       | 0 | 1 | 0.0253181  | 3.23881   | 3.13533   | No change |
| NM_026251 | Patl2         | 0 | 1 | -0.886145  | 0.257698  | 0.11798   | No change |
| NM_026254 | Tbc1d23       | 0 | 1 | -0.0501209 | 18.4639   | 16.9741   | No change |
| NM_026270 | Akt1s1        | 0 | 1 | 0.165694   | 7.19895   | 7.68864   | No change |
| NM_026271 | Fibin         | 0 | 1 | -0.433633  | 1.88632   | 1.31854   | No change |
| NM_026277 | Nob1          | 0 | 1 | -0.085454  | 6.51652   | 5.84092   | No change |
| NM_026279 | Bend5         | 0 | 1 | 0.410837   | 2.63352   | 3.34186   | No change |
| NM_026280 | Mxra7         | 0 | 1 | 0.00888525 | 2.2625    | 2.16413   | No change |
| NM_026302 | Dctn4         | 0 | 1 | 0.0459322  | 17.5264   | 17.2229   | No change |
| NM_026304 | I7Rn6         | 0 | 1 | 0.295185   | 7.40279   | 8.65614   | No change |
| NM_026308 | Rpp21         | 0 | 1 | -0.123942  | 28.2953   | 24.6961   | No change |
| NM_026309 | Lsm3          | 0 | 1 | -0.206186  | 20.9852   | 17.2935   | No change |
| NM_026318 | 2310003F16Rik | 0 | 1 | 0.278242   | 26.6541   | 30.7845   | No change |
| NM_026321 | Fam174a       | 0 | 1 | 0.157947   | 9.55921   | 10.1536   | No change |
| NM_026328 | Reg4          | 0 | 1 | -1.88615   | 0.204778  | 0         | No change |
| NM_026334 | Lipf          | 0 | 1 | -1.65168   | 0.824159  | 0.212242  | No change |
| NM_026335 | Lce1h         | 0 | 1 | 0.113855   | 0         | 0         | No change |
| NM_026336 | 2310057J18Rik | 0 | 1 | 1.11385    | 0         | 0.0544283 | No change |
| NM_026344 | Dph2          | 0 | 1 | -0.310285  | 2.89697   | 2.21682   | No change |
| NM_026352 | Ppid          | 0 | 1 | -0.197678  | 9.71991   | 8.05987   | No change |
| NM_026360 | Ddx47         | 0 | 1 | -0.0646833 | 7.42759   | 6.75584   | No change |
| NM_026364 | Prpsap1       | 0 | 1 | -0.116999  | 14.8489   | 13.0284   | No change |
| NM_026374 | Ilf2          | 0 | 1 | 0.139111   | 15.9661   | 16.7379   | No change |
| NM_026376 | Plxnd1        | 0 | 1 | 0.176139   | 2.04831   | 2.20352   | No change |
| NM_026377 | 6330577E15Rik | 0 | 1 | -0.167795  | 20.5601   | 17.4149   | No change |
| NM_026380 | Rgs8          | 0 | 1 | -1.88615   | 0.0360232 | 0         | No change |
| NM_026385 | Plip          | 0 | 1 | -0.65168   | 1.8447    | 1.10214   | No change |
| NM_026390 | Ubxn4         | 0 | 1 | 0.0995642  | 18.9855   | 19.3641   | No change |
| NM_026392 | Tmem70        | 0 | 1 | 0.144749   | 9.25484   | 9.74069   | No change |
| NM_026394 | Lce1f         | 0 | 1 | 0.113855   | 0         | 0         | No change |
| NM_026396 | Brix1         | 0 | 1 | -0.229823  | 10.5038   | 8.52078   | No change |
| NM_026401 | Mrp63         | 0 | 1 | -0.0520571 | 10.7497   | 9.86701   | No change |
| NM_026405 | Rab32         | 0 | 1 | 0.215734   | 1.35721   | 1.50293   | No change |
| NM_026414 | Asprv1        | 0 | 1 | -0.6935    | 0.273127  | 0.140675  | No change |
| NM_026415 | 2310002J15Rik | 0 | 1 | -0.886145  | 0.267707  | 0.0919219 | No change |
| NM_026419 | Cela3b        | 0 | 1 | -1.47111   | 0.155391  | 0         | No change |
| NM_026420 | Paip2         | 0 | 1 | 0.128754   | 56.5276   | 58.8343   | No change |
| NM_026421 | Enoph1        | 0 | 1 | 0.25079    | 8.76401   | 9.93063   | No change |
| NM_026429 | Tpbpb         | 0 | 1 | 0.113855   | 0         | 0         | No change |
| NM_026431 | 1810043G02Rik | 0 | 1 | -0.214378  | 7.02682   | 5.75682   | No change |
| NM_026439 | Ccdc80        | 0 | 1 | 0.134033   | 1.33731   | 1.39725   | No change |
| NM_026443 | Mtfp1         | 0 | 1 | -0.586585  | 3.84409   | 2.41703   | No change |
| NM_026445 | Sumf2         | 0 | 1 | 0.427963   | 2.35427   | 3.02313   | No change |
| NM_026446 | Rgs19         | 0 | 1 | -0.305684  | 5.07032   | 3.89258   | No change |
| NM_026453 | Mak16         | 0 | 1 | 0.0525847  | 18.0143   | 17.7834   | No change |
| NM_026460 | Serpini2      | 0 | 1 | -2.47111   | 0.247138  | 0         | No change |
| NM_026464 | Wdr55         | 0 | 1 | 0.425056   | 4.97807   | 6.37396   | No change |
| NM_026474 | Sugt1         | 0 | 1 | -0.116151  | 10.1449   | 8.90488   | No change |
| NM_026479 | Zcchc10       | 0 | 1 | -0.886145  | 1.94054   | 0.97092   | No change |

|           |               |   |   |             |           |           |           |
|-----------|---------------|---|---|-------------|-----------|-----------|-----------|
| NM_026480 | Ooep          | 0 | 1 | 0.113855    | 0.0577406 | 0.0594789 | No change |
| NM_026492 | Ssxb1         | 0 | 1 | -1.10854    | 0.477894  | 0.164094  | No change |
| NM_026498 | Mrps11        | 0 | 1 | -0.499963   | 6.68197   | 4.47403   | No change |
| NM_026500 | Ddx59         | 0 | 1 | 0.240612    | 3.03421   | 3.41555   | No change |
| NM_026501 | Fam134c       | 0 | 1 | 0.0413754   | 20.2116   | 19.7988   | No change |
| NM_026503 | 1110058L19Rik | 0 | 1 | 0.0984248   | 19.5391   | 19.912    | No change |
| NM_026504 | Coq5          | 0 | 1 | 0.296547    | 6.93098   | 8.10833   | No change |
| NM_026505 | Bambi         | 0 | 1 | -0.222012   | 3.58144   | 2.92007   | No change |
| NM_026506 | Snrpg         | 0 | 1 | 0.238867    | 40.9646   | 46.0339   | No change |
| NM_026510 | Ftsj2         | 0 | 1 | 0.376889    | 2.36657   | 2.93532   | No change |
| NM_026513 | Pdf           | 0 | 1 | 0.237726    | 6.53371   | 7.33801   | No change |
| NM_026515 | 2810417H13Rik | 0 | 1 | -0.129416   | 1.66422   | 1.44364   | No change |
| NM_026516 | Tmem178       | 0 | 1 | -0.623111   | 0.16437   | 0.0846592 | No change |
| NM_026517 | Rpl22l1       | 0 | 1 | 0.27923     | 35.9423   | 41.5394   | No change |
| NM_026519 | Tmem85        | 0 | 1 | 0.193958    | 41.2439   | 44.9154   | No change |
| NM_026520 | Fam122a       | 0 | 1 | 0.330666    | 4.52018   | 5.41819   | No change |
| NM_026523 | Nmb           | 0 | 1 | -0.365313   | 4.47387   | 3.27719   | No change |
| NM_026527 | Chac2         | 0 | 1 | -0.0667174  | 3.51613   | 3.18951   | No change |
| NM_026529 | 2700062C07Rik | 0 | 1 | -0.00694333 | 16.7479   | 15.8608   | No change |
| NM_026534 | Ubxn2b        | 0 | 1 | 0.210789    | 3.79742   | 4.18465   | No change |
| NM_026535 | Serpina12     | 0 | 1 | 0.113855    | 0         | 0         | No change |
| NM_026547 | 1520402A15Rik | 0 | 1 | -0.310643   | 7.42349   | 5.68492   | No change |
| NM_026557 | Rchy1         | 0 | 1 | 0.0532285   | 17.1841   | 16.9714   | No change |
| NM_026571 | Lhfp15        | 0 | 1 | -0.886145   | 0.0558885 | 0         | No change |
| NM_026574 | Ino80         | 0 | 1 | -0.0578197  | 7.9823    | 7.29884   | No change |
| NM_026576 | Etaa1         | 0 | 1 | 0.180197    | 2.80966   | 3.03125   | No change |
| NM_026588 | Stx19         | 0 | 1 | 0.376889    | 3.46118   | 4.29054   | No change |
| NM_026591 | Mrpl24        | 0 | 1 | -0.220693   | 35.7644   | 29.2005   | No change |
| NM_026597 | 6230427J02Rik | 0 | 1 | 1.00694     | 0.853919  | 1.69159   | No change |
| NM_026598 | Ebpl          | 0 | 1 | 0.336247    | 1.77839   | 2.14301   | No change |
| NM_026599 | Cgnl1         | 0 | 1 | 0.0799768   | 10.2156   | 10.2786   | No change |
| NM_026601 | Hyi           | 0 | 1 | 0.528892    | 1.75761   | 2.44026   | No change |
| NM_026602 | Bcas2         | 0 | 1 | -0.102326   | 15.1914   | 13.464    | No change |
| NM_026610 | Ndufb4        | 0 | 1 | 0.225301    | 59.1008   | 65.782    | No change |
| NM_026612 | Ndufb2        | 0 | 1 | 0.573286    | 4.74831   | 6.78464   | No change |
| NM_026614 | Ndufa5        | 0 | 1 | 0.127176    | 68.2965   | 71.0064   | No change |
| NM_026620 | Fam98b        | 0 | 1 | 0.541948    | 2.02226   | 2.81609   | No change |
| NM_026629 | 2410066E13Rik | 0 | 1 | 0.12793     | 4.11637   | 4.28227   | No change |
| NM_026633 | Fam195a       | 0 | 1 | -0.371572   | 7.08887   | 5.19077   | No change |
| NM_026635 | Fam96a        | 0 | 1 | 0.206964    | 18.2993   | 20.1106   | No change |
| NM_026636 | 5430437P03Rik | 0 | 1 | 0.138623    | 10.0687   | 10.5522   | No change |
| NM_026640 | Fam111a       | 0 | 1 | 0.476425    | 0.89322   | 1.18941   | No change |
| NM_026642 | Trmt12        | 0 | 1 | -0.0477343  | 2.52938   | 2.3276    | No change |
| NM_026655 | 2310057M21Rik | 0 | 1 | -0.163679   | 5.00505   | 4.24779   | No change |
| NM_026664 | Vps53         | 0 | 1 | 0.220537    | 10.939    | 12.1351   | No change |
| NM_026670 | Zmyrn1        | 0 | 1 | -0.273627   | 4.38309   | 3.44717   | No change |
| NM_026671 | Lypd2         | 0 | 1 | -0.886145   | 0.141652  | 0         | No change |
| NM_026674 | Aph1c         | 0 | 1 | 0.0222243   | 2.6076    | 2.51995   | No change |
| NM_026677 | Rab13         | 0 | 1 | 0.229332    | 2.27755   | 2.54721   | No change |
| NM_026678 | Blvra         | 0 | 1 | 0.481587    | 3.63356   | 4.84742   | No change |
| NM_026685 | Tmem174       | 0 | 1 | 0.113855    | 0         | 0         | No change |
| NM_026690 | Aspdh         | 0 | 1 | -1.10854    | 0.432875  | 0.148636  | No change |
| NM_026700 | Dopey2        | 0 | 1 | 0.331446    | 3.58275   | 4.3057    | No change |
| NM_026701 | Pbld1         | 0 | 1 | 0.573286    | 0.251081  | 0.369485  | No change |
| NM_026703 | Ndufa8        | 0 | 1 | 0.175916    | 42.8154   | 46.0473   | No change |
| NM_026712 | Zfp414        | 0 | 1 | 0.376889    | 5.18071   | 6.41672   | No change |
| NM_026713 | Mogat1        | 0 | 1 | -0.301183   | 0.173366  | 0.119056  | No change |
| NM_026716 | Sycn          | 0 | 1 | 0.113855    | 0         | 0         | No change |
| NM_026730 | Gpihbp1       | 0 | 1 | 1.3065      | 0.524665  | 1.35115   | No change |
| NM_026731 | Ppp1r14a      | 0 | 1 | 0.376889    | 0.524994  | 0.675998  | No change |
| NM_026741 | Zfp579        | 0 | 1 | 0.613426    | 0.903845  | 1.33008   | No change |
| NM_026743 | Tspan11       | 0 | 1 | 0.714247    | 0.496742  | 0.784601  | No change |
| NM_026744 | Mrpl53        | 0 | 1 | -0.0392619  | 32.2611   | 29.8743   | No change |
| NM_026746 | Nsmce2        | 0 | 1 | 0.177985    | 7.98755   | 8.60487   | No change |
| NM_026753 | Fam96b        | 0 | 1 | -0.0550221  | 17.5257   | 16.0474   | No change |
| NM_026759 | Mrpl13        | 0 | 1 | -0.158979   | 28.7284   | 24.4783   | No change |
| NM_026760 | 2310036O22Rik | 0 | 1 | -0.131111   | 28.4397   | 24.7083   | No change |
| NM_026768 | Mrps18a       | 0 | 1 | -0.247482   | 13.3901   | 10.7188   | No change |
| NM_026772 | Cdc42ep2      | 0 | 1 | 0.509783    | 0.841363  | 1.15559   | No change |
| NM_026778 | Cthrc1        | 0 | 1 | -0.208073   | 0.838231  | 0.678437  | No change |
| NM_026788 | Mthfd2l       | 0 | 1 | 0.409311    | 2.01873   | 2.55939   | No change |
| NM_026790 | Ifi271l       | 0 | 1 | 0.311301    | 4.8977    | 5.79509   | No change |
| NM_026791 | Fbxw9         | 0 | 1 | -0.173722   | 9.3832    | 7.91182   | No change |
| NM_026792 | Agpat5        | 0 | 1 | 0.219348    | 2.62099   | 2.90614   | No change |
| NM_026793 | Myct1         | 0 | 1 | 0.833747    | 0.401544  | 0.698004  | No change |
| NM_026796 | Smyd2         | 0 | 1 | 0.148206    | 10.7688   | 11.3613   | No change |

|           |               |   |   |            |           |           |           |
|-----------|---------------|---|---|------------|-----------|-----------|-----------|
| NM_026798 | Tmem216       | 0 | 1 | 0.0365491  | 7.24908   | 7.07429   | No change |
| NM_026806 | Klk5          | 0 | 1 | 0.113855   | 0         | 0         | No change |
| NM_026807 | Krtap4-2      | 0 | 1 | 0.113855   | 0         | 0         | No change |
| NM_026811 | Lce1e         | 0 | 1 | 0.113855   | 0         | 0         | No change |
| NM_026812 | Hddc3         | 0 | 1 | 0.44102    | 4.37607   | 5.6765    | No change |
| NM_026816 | Gif2f2        | 0 | 1 | -0.129416  | 21.9958   | 19.1345   | No change |
| NM_026818 | Cilp2         | 0 | 1 | 1.98832    | 0.0346559 | 0.178496  | No change |
| NM_026822 | Lce1b         | 0 | 1 | -2.47111   | 0.538585  | 0         | No change |
| NM_026826 | Mrps18c       | 0 | 1 | 0.276126   | 5.69205   | 6.57846   | No change |
| NM_026827 | Tmem219       | 0 | 1 | 0.0653563  | 26.7255   | 26.6174   | No change |
| NM_026831 | Mybphl        | 0 | 1 | 1.69882    | 0         | 0.112525  | No change |
| NM_026834 | Krtap4-6      | 0 | 1 | 0.113855   | 0         | 0         | No change |
| NM_026835 | Ms4a6d        | 0 | 1 | 0.158249   | 1.57584   | 1.67565   | No change |
| NM_026844 | 2310061C15Rik | 0 | 1 | -0.352463  | 5.03338   | 3.73911   | No change |
| NM_026855 | Arv1          | 0 | 1 | -0.484047  | 3.29022   | 2.21843   | No change |
| NM_026860 | Gkn3          | 0 | 1 | 2.11385    | 0         | 0.271593  | No change |
| NM_026869 | Pygo2         | 0 | 1 | 0.21007    | 8.30761   | 9.14959   | No change |
| NM_026886 | Srrm4         | 0 | 1 | 0.528892   | 0.0186469 | 0.0288124 | No change |
| NM_026890 | Ngdn          | 0 | 1 | 0.186611   | 6.67891   | 7.23892   | No change |
| NM_026894 | 1500001M20Rik | 0 | 1 | 0.499746   | 4.42305   | 5.97232   | No change |
| NM_026896 | Med27         | 0 | 1 | -0.0180569 | 5.77003   | 5.41929   | No change |
| NM_026897 | Haghl         | 0 | 1 | -0.107703  | 15.8493   | 13.9941   | No change |
| NM_026900 | Zfp580        | 0 | 1 | 0.274319   | 1.01188   | 1.17263   | No change |
| NM_026906 | Cts3          | 0 | 1 | 0.113855   | 0         | 0         | No change |
| NM_026907 | Sectm1b       | 0 | 1 | 0.515953   | 0.810383  | 1.11304   | No change |
| NM_026912 | Snx15         | 0 | 1 | -0.257401  | 5.33664   | 4.23944   | No change |
| NM_026918 | Zg16          | 0 | 1 | 0.113855   | 0         | 0         | No change |
| NM_026922 | Atp2c2        | 0 | 1 | -0.6935    | 0.129742  | 0.0668237 | No change |
| NM_026925 | Phlip         | 0 | 1 | -1.47111   | 0.0937363 | 0         | No change |
| NM_026929 | Chac1         | 0 | 1 | 0.330666   | 1.59907   | 1.92175   | No change |
| NM_026942 | Stoml1        | 0 | 1 | 0.140086   | 3.78614   | 3.97234   | No change |
| NM_026945 | Adh6a         | 0 | 1 | 0.113855   | 0         | 0         | No change |
| NM_026947 | Eci3          | 0 | 1 | -0.191     | 5.38489   | 4.48027   | No change |
| NM_026951 | Pex11c        | 0 | 1 | 0.073308   | 26.7383   | 26.7782   | No change |
| NM_026956 | Cd209f        | 0 | 1 | -0.491866  | 2.13666   | 1.42417   | No change |
| NM_026959 | Stx18         | 0 | 1 | 0.122844   | 7.09422   | 7.35375   | No change |
| NM_026960 | Gsdmd         | 0 | 1 | -0.659869  | 2.04056   | 1.21269   | No change |
| NM_026963 | Lzic          | 0 | 1 | -0.357217  | 5.4515    | 4.04001   | No change |
| NM_026967 | Rhebl1        | 0 | 1 | 0.113855   | 1.32147   | 1.36125   | No change |
| NM_026968 | Manbal        | 0 | 1 | 0.378997   | 7.11409   | 8.81985   | No change |
| NM_026975 | Bola1         | 0 | 1 | 0.14862    | 15.5829   | 16.4459   | No change |
| NM_026976 | Faim3         | 0 | 1 | -0.345577  | 1.49576   | 1.10744   | No change |
| NM_026977 | 1810031K17Rik | 0 | 1 | -0.0741588 | 15.8069   | 14.29     | No change |
| NM_026979 | C1qtnf2       | 0 | 1 | 0.45089    | 1.0359    | 1.36349   | No change |
| NM_026981 | Dtdw1         | 0 | 1 | -0.44874   | 4.92988   | 3.42116   | No change |
| NM_026983 | Erp27         | 0 | 1 | -2.20807   | 0.29252   | 0         | No change |
| NM_026985 | 1810033B17Rik | 0 | 1 | -1.10854   | 0.369397  | 0.126839  | No change |
| NM_026991 | Sat2          | 0 | 1 | 0.430328   | 4.10888   | 5.29072   | No change |
| NM_026994 | Cryz1         | 0 | 1 | -0.017184  | 13.2843   | 12.4925   | No change |
| NM_026999 | Zfp688        | 0 | 1 | 0.100308   | 7.27111   | 7.41934   | No change |
| NM_027000 | Gtpbp4        | 0 | 1 | -0.0070327 | 22.9593   | 21.7472   | No change |
| NM_027002 | Polr2d        | 0 | 1 | 0.230264   | 8.60227   | 9.61218   | No change |
| NM_027010 | Crygf         | 0 | 1 | 0.113855   | 0         | 0         | No change |
| NM_027017 | 3300002I08Rik | 0 | 1 | 0.435783   | 0.752856  | 0.997097  | No change |
| NM_027030 | Dcps          | 0 | 1 | 0.0383038  | 17.1022   | 16.7152   | No change |
| NM_027060 | Btbd9         | 0 | 1 | -0.155933  | 10.0011   | 8.5433    | No change |
| NM_027067 | 1700014N06Rik | 0 | 1 | -3.05607   | 0.5315    | 0         | No change |
| NM_027087 | Krtap4-13     | 0 | 1 | 0.113855   | 0         | 0         | No change |
| NM_027093 | 2310003L22Rik | 0 | 1 | -0.0381483 | 0.994885  | 0.919723  | No change |
| NM_027097 | Klk12         | 0 | 1 | -0.886145  | 0.0749386 | 0         | No change |
| NM_027102 | Esam          | 0 | 1 | 0.464762   | 2.55616   | 3.36883   | No change |
| NM_027104 | 2310002L09Rik | 0 | 1 | 0.113855   | 0         | 0         | No change |
| NM_027105 | Krtap26-1     | 0 | 1 | -1.88615   | 0.214881  | 0         | No change |
| NM_027111 | Lyg1          | 0 | 1 | 0.113855   | 0         | 0         | No change |
| NM_027112 | Capns2        | 0 | 1 | -1.47111   | 0.961282  | 0.28292   | No change |
| NM_027113 | Wdr5b         | 0 | 1 | 0.252683   | 3.82628   | 4.34366   | No change |
| NM_027117 | Klhdc2        | 0 | 1 | 0.0799075  | 13.824    | 13.9081   | No change |
| NM_027120 | Itgb1bp3      | 0 | 1 | -0.819031  | 0.757532  | 0.390168  | No change |
| NM_027122 | Mfsd3         | 0 | 1 | -0.367272  | 2.12067   | 1.55564   | No change |
| NM_027123 | Fastkd3       | 0 | 1 | 0.238551   | 4.21934   | 4.74149   | No change |
| NM_027128 | Odum          | 0 | 1 | 0.435783   | 0.882189  | 1.15659   | No change |
| NM_027129 | 2310035K24Rik | 0 | 1 | 0.499746   | 3.60145   | 4.86294   | No change |
| NM_027130 | Afg3l2        | 0 | 1 | 0.10402    | 16.7509   | 17.1378   | No change |
| NM_027132 | Otop3         | 0 | 1 | -2.20807   | 0.1151    | 0         | No change |
| NM_027134 | Mtfmt         | 0 | 1 | 0.286691   | 1.84301   | 2.14459   | No change |
| NM_027137 | Lce1d         | 0 | 1 | 0.113855   | 0         | 0         | No change |

|           |               |   |   |              |           |           |           |
|-----------|---------------|---|---|--------------|-----------|-----------|-----------|
| NM_027147 | Enho          | 0 | 1 | -0.484047    | 3.07387   | 2.07255   | No change |
| NM_027149 | Wdr20a        | 0 | 1 | -0.22318     | 10.9981   | 8.96278   | No change |
| NM_027152 | Cd164l2       | 0 | 1 | 0.620815     | 1.27228   | 1.89307   | No change |
| NM_027153 | Pir           | 0 | 1 | 0.599282     | 0.391778  | 0.582937  | No change |
| NM_027155 | 2310061N02Rik | 0 | 1 | -1.88615     | 0.263988  | 0         | No change |
| NM_027156 | Ddx51         | 0 | 1 | -0.0310188   | 2.24352   | 2.08884   | No change |
| NM_027157 | Krtap1-5      | 0 | 1 | 0.113855     | 0         | 0         | No change |
| NM_027159 | Ccdc115       | 0 | 1 | 0.251358     | 8.13425   | 9.22125   | No change |
| NM_027161 | Tmem52        | 0 | 1 | -1.20807     | 2.51068   | 0.980995  | No change |
| NM_027163 | Il1f8         | 0 | 1 | 0.113855     | 0         | 0         | No change |
| NM_027170 | 2310057N15Rik | 0 | 1 | -0.886145    | 0.0679268 | 0         | No change |
| NM_027173 | 2310079G19Rik | 0 | 1 | -0.886145    | 0.0792866 | 0         | No change |
| NM_027175 | Ndufaf1       | 0 | 1 | 0.28554      | 8.69361   | 10.0933   | No change |
| NM_027184 | lpmk          | 0 | 1 | 0.17596      | 4.3743    | 4.70478   | No change |
| NM_027189 | Gemin7        | 0 | 1 | -0.396629    | 13.7011   | 9.87949   | No change |
| NM_027194 | Tm2d2         | 0 | 1 | 0.097795     | 29.4332   | 29.983    | No change |
| NM_027206 | Tnfaip8l2     | 0 | 1 | 0.245099     | 1.2423    | 1.40767   | No change |
| NM_027209 | Ms4a6b        | 0 | 1 | 0.113855     | 1.94165   | 2.0001    | No change |
| NM_027210 | Ceacam13      | 0 | 1 | 0.113855     | 0         | 0         | No change |
| NM_027211 | Anxa13        | 0 | 1 | 0.755401     | 1.35107   | 2.2036    | No change |
| NM_027213 | Med6          | 0 | 1 | 0.297773     | 15.7573   | 18.4483   | No change |
| NM_027217 | 1810046K07Rik | 0 | 1 | -0.400718    | 0.4759    | 0.326818  | No change |
| NM_027219 | Cdc42ep1      | 0 | 1 | -0.0745903   | 1.316     | 1.18616   | No change |
| NM_027220 | Prss32        | 0 | 1 | -0.886145    | 0.0477349 | 0         | No change |
| NM_027221 | Krtcap3       | 0 | 1 | 0.296058     | 3.93179   | 4.60606   | No change |
| NM_027227 | Glod5         | 0 | 1 | 0.113855     | 0.10371   | 0.106832  | No change |
| NM_027231 | Polr2f        | 0 | 1 | 0.635808     | 5.09295   | 7.59328   | No change |
| NM_027236 | Eif1ad        | 0 | 1 | 0.17607      | 8.29879   | 8.92662   | No change |
| NM_027237 | 2010003K11Rik | 0 | 1 | -3.05607     | 0.477758  | 0         | No change |
| NM_027238 | Ttc39b        | 0 | 1 | -0.000136296 | 4.49298   | 4.276     | No change |
| NM_027241 | Polr3gl       | 0 | 1 | -0.333604    | 6.66109   | 5.0182    | No change |
| NM_027249 | Tlcd2         | 0 | 1 | 0.239386     | 1.28382   | 1.44841   | No change |
| NM_027250 | 2010305A19Rik | 0 | 1 | 0.34832      | 2.44749   | 2.97049   | No change |
| NM_027256 | Ints4         | 0 | 1 | -0.102279    | 9.86099   | 8.7415    | No change |
| NM_027261 | Taf1d         | 0 | 1 | 0.299158     | 10.0292   | 11.7543   | No change |
| NM_027266 | Rg9mtd3       | 0 | 1 | -0.360826    | 3.65173   | 2.69704   | No change |
| NM_027276 | Cdc16         | 0 | 1 | 0.206421     | 10.3399   | 11.3591   | No change |
| NM_027278 | 2810432D09Rik | 0 | 1 | 0.273796     | 11.9616   | 13.7763   | No change |
| NM_027286 | Ace2          | 0 | 1 | 0.541948     | 1.10106   | 1.53328   | No change |
| NM_027292 | Tspo2         | 0 | 1 | 1.11385      | 0         | 0.0767818 | No change |
| NM_027301 | Sdr9c7        | 0 | 1 | 0.113855     | 0.269085  | 0.277185  | No change |
| NM_027308 | 2210010C17Rik | 0 | 1 | -0.471108    | 0.0735546 | 0.0378844 | No change |
| NM_027309 | Lysmd2        | 0 | 1 | 0.113855     | 1.33578   | 1.37599   | No change |
| NM_027315 | Ube2q1        | 0 | 1 | -0.04197     | 9.47788   | 8.76125   | No change |
| NM_027321 | Lrrc39        | 0 | 1 | -1.38865     | 0.387183  | 0.124637  | No change |
| NM_027340 | Lipn          | 0 | 1 | 0.113855     | 0         | 0         | No change |
| NM_027343 | Cd209g        | 0 | 1 | -1.76061     | 0.837656  | 0.172574  | No change |
| NM_027344 | Ctsll3        | 0 | 1 | 0.113855     | 0         | 0         | No change |
| NM_027346 | Taco1         | 0 | 1 | 0.409311     | 2.24143   | 2.84587   | No change |
| NM_027349 | Rbm25         | 0 | 1 | -0.0829017   | 20.5926   | 18.506    | No change |
| NM_027351 | Ppil3         | 0 | 1 | 0.309642     | 13.2417   | 15.6345   | No change |
| NM_027356 | Ufsp1         | 0 | 1 | 0.517211     | 4.26834   | 5.83842   | No change |
| NM_027381 | 2510012J08Rik | 0 | 1 | 0.0723355    | 3.58187   | 3.58428   | No change |
| NM_027384 | Tet1          | 0 | 1 | 0.313792     | 0.363763  | 0.431177  | No change |
| NM_027391 | lyd           | 0 | 1 | -0.514176    | 1.49342   | 0.978968  | No change |
| NM_027394 | Ube2cbp       | 0 | 1 | -0.0925961   | 1.10563   | 0.981824  | No change |
| NM_027397 | Isl2          | 0 | 1 | -0.886145    | 0.112955  | 0.038785  | No change |
| NM_027399 | Steap1        | 0 | 1 | 0.265858     | 0.974326  | 1.12173   | No change |
| NM_027403 | Psg21         | 0 | 1 | -0.886145    | 0.0322802 | 0         | No change |
| NM_027410 | Tecpr1        | 0 | 1 | 0.0242795    | 4.99003   | 4.82976   | No change |
| NM_027421 | Ints2         | 0 | 1 | 0.0709462    | 9.62662   | 9.62547   | No change |
| NM_027422 | Mier2         | 0 | 1 | 0.0207454    | 4.76045   | 4.59552   | No change |
| NM_027423 | Polr3b        | 0 | 1 | 0.244749     | 5.15122   | 5.81165   | No change |
| NM_027432 | Wdr77         | 0 | 1 | -0.0306891   | 9.6507    | 8.99155   | No change |
| NM_027444 | Bbx           | 0 | 1 | 0.00216107   | 40.9771   | 39.0654   | No change |
| NM_027450 | Glipr2        | 0 | 1 | 0.38037      | 2.34726   | 2.91573   | No change |
| NM_027452 | Lrln2         | 0 | 1 | -1.47111     | 0.0464465 | 0         | No change |
| NM_027454 | Chrn3         | 0 | 1 | -2.20807     | 0.0613494 | 0         | No change |
| NM_027457 | 5730437N04Rik | 0 | 1 | 0.0883197    | 40.8396   | 41.3297   | No change |
| NM_027464 | 5730469M10Rik | 0 | 1 | 0.0721058    | 26.9794   | 26.9975   | No change |
| NM_027469 | Gfod2         | 0 | 1 | -0.0601746   | 1.4719    | 1.33991   | No change |
| NM_027475 | Ecd           | 0 | 1 | 0.0424358    | 20.2946   | 19.8947   | No change |
| NM_027477 | Zfp398        | 0 | 1 | 0.2786       | 4.94944   | 5.71768   | No change |
| NM_027491 | Rragd         | 0 | 1 | 0.227437     | 4.03217   | 4.49494   | No change |
| NM_027493 | Actr8         | 0 | 1 | -0.218721    | 11.139    | 9.10503   | No change |
| NM_027500 | 4933434E20Rik | 0 | 1 | -0.0966439   | 19.0359   | 16.938    | No change |

|           |               |   |   |            |           |           |           |
|-----------|---------------|---|---|------------|-----------|-----------|-----------|
| NM_027511 | Hrct1         | 0 | 1 | -0.108538  | 0.458004  | 0.39316   | No change |
| NM_027514 | Pvr           | 0 | 1 | 0.330347   | 2.50972   | 3.00786   | No change |
| NM_027518 | Gpr137c       | 0 | 1 | 0.350894   | 0.76993   | 0.93998   | No change |
| NM_027519 | 6330406115Rik | 0 | 1 | 0.364398   | 1.38126   | 1.69742   | No change |
| NM_027526 | Rasgef1a      | 0 | 1 | 0.113855   | 0         | 0         | No change |
| NM_027533 | Tspan2        | 0 | 1 | 0.292561   | 1.47829   | 1.72583   | No change |
| NM_027543 | Gpr173        | 0 | 1 | 0.698817   | 0.0650525 | 0.111685  | No change |
| NM_027545 | Cwf1912       | 0 | 1 | 0.14986    | 4.86599   | 5.1396    | No change |
| NM_027547 | Prdm5         | 0 | 1 | -0.284695  | 0.894318  | 0.690931  | No change |
| NM_027548 | Serpnb7       | 0 | 1 | -0.886145  | 0.0369332 | 0         | No change |
| NM_027551 | Klhl30        | 0 | 1 | -0.6935    | 0.138463  | 0.0713155 | No change |
| NM_027552 | Kynu          | 0 | 1 | -2.20807   | 0.102002  | 0         | No change |
| NM_027554 | Usp38         | 0 | 1 | 0.115793   | 11.0527   | 11.4007   | No change |
| NM_027563 | Krt34         | 0 | 1 | 0.113855   | 0         | 0         | No change |
| NM_027568 | Krtap31-1     | 0 | 1 | 0.113855   | 0         | 0         | No change |
| NM_027571 | P2ry12        | 0 | 1 | 0.55126    | 1.40101   | 1.96519   | No change |
| NM_027574 | Krt28         | 0 | 1 | -1.88615   | 0.140416  | 0         | No change |
| NM_027671 | Sntg1         | 0 | 1 | 0.482242   | 0.897548  | 1.19851   | No change |
| NM_027698 | Eri2          | 0 | 1 | 0.0125715  | 5.74103   | 5.51155   | No change |
| NM_027700 | 4933416108Rik | 0 | 1 | -2.47111   | 0.276121  | 0         | No change |
| NM_027748 | Taf3          | 0 | 1 | -0.337709  | 2.30618   | 1.73314   | No change |
| NM_027762 | Tchhl1        | 0 | 1 | 0.698817   | 0.708399  | 1.11196   | No change |
| NM_027763 | Trem1         | 0 | 1 | 0.113855   | 0         | 0         | No change |
| NM_027768 | 5430402E10Rik | 0 | 1 | 0.528892   | 0.436673  | 0.629745  | No change |
| NM_027770 | Col24a1       | 0 | 1 | -1.76061   | 0.0976502 | 0.020118  | No change |
| NM_027771 | Krtap7-1      | 0 | 1 | 0.113855   | 0         | 0         | No change |
| NM_027773 | Fam57a        | 0 | 1 | 0.3065     | 0.449632  | 0.540362  | No change |
| NM_027782 | Kctd6         | 0 | 1 | 0.364178   | 3.9752    | 4.879     | No change |
| NM_027784 | 5530400C23Rik | 0 | 1 | 0.113855   | 0         | 0         | No change |
| NM_027788 | Fam83c        | 0 | 1 | -0.400718  | 0.268394  | 0.184316  | No change |
| NM_027790 | Dhrs2         | 0 | 1 | -3.20807   | 0.492723  | 0         | No change |
| NM_027793 | Amtn          | 0 | 1 | 3.11385    | 0         | 0.491719  | No change |
| NM_027799 | Ankrd40       | 0 | 1 | -0.0758787 | 9.85637   | 8.89937   | No change |
| NM_027800 | Krtap2-4      | 0 | 1 | -1.88615   | 0.251902  | 0         | No change |
| NM_027802 | Obox1         | 0 | 1 | 0.113855   | 0         | 0         | No change |
| NM_027817 | Grap          | 0 | 1 | 0.557461   | 1.04605   | 1.48161   | No change |
| NM_027827 | Afmid         | 0 | 1 | -0.16032   | 1.52416   | 1.29298   | No change |
| NM_027832 | Sval1         | 0 | 1 | 0.113855   | 0         | 0         | No change |
| NM_027837 | Isx           | 0 | 1 | 0.113855   | 0         | 0         | No change |
| NM_027839 | Ceacam20      | 0 | 1 | -1.20807   | 0.33703   | 0.123991  | No change |
| NM_027840 | Snx20         | 0 | 1 | 0.528892   | 0.680405  | 0.951205  | No change |
| NM_027843 | Arl14         | 0 | 1 | 1.11385    | 0         | 0.0598258 | No change |
| NM_027844 | Krtap5-2      | 0 | 1 | 0.113855   | 0         | 0         | No change |
| NM_027853 | Mettl7b       | 0 | 1 | -0.886145  | 0.397596  | 0.175528  | No change |
| NM_027859 | Rnf215        | 0 | 1 | 0.138517   | 4.13982   | 4.33861   | No change |
| NM_027865 | Tmem25        | 0 | 1 | 0.611354   | 0.473699  | 0.701441  | No change |
| NM_027866 | Colec11       | 0 | 1 | -1.07879   | 0.755889  | 0.311458  | No change |
| NM_027869 | Pnpt1         | 0 | 1 | -0.178596  | 2.78359   | 2.33639   | No change |
| NM_027873 | Ubiad1        | 0 | 1 | 0.00951815 | 5.02165   | 4.81024   | No change |
| NM_027886 | Stk11ip       | 0 | 1 | 0.0912534  | 3.00158   | 3.04363   | No change |
| NM_027895 | Ulk3          | 0 | 1 | 0.423183   | 2.24418   | 2.87062   | No change |
| NM_027897 | Rhpn2         | 0 | 1 | 0.00621409 | 3.08035   | 2.94345   | No change |
| NM_027898 | Gramd1a       | 0 | 1 | -0.0555707 | 9.35825   | 8.56886   | No change |
| NM_027901 | Gtf3c2        | 0 | 1 | -0.159414  | 14.7165   | 12.5409   | No change |
| NM_027902 | Tmprss6       | 0 | 1 | -0.208073  | 0.196503  | 0.157436  | No change |
| NM_027903 | Dhdh          | 0 | 1 | 0.134916   | 5.16715   | 5.40137   | No change |
| NM_027904 | Cpn2          | 0 | 1 | -0.886145  | 0.0152102 | 0         | No change |
| NM_027906 | 1300010F03Rik | 0 | 1 | 0.0145827  | 3.92325   | 3.77193   | No change |
| NM_027909 | C2cd2l        | 0 | 1 | 0.219649   | 2.94273   | 3.26323   | No change |
| NM_027912 | Tysnd1        | 0 | 1 | -0.0850493 | 3.99378   | 3.58013   | No change |
| NM_027913 | Vvce          | 0 | 1 | -3.20807   | 0.177185  | 0         | No change |
| NM_027921 | Slc16a14      | 0 | 1 | -1.32672   | 0.534046  | 0.183374  | No change |
| NM_027922 | Ankle2        | 0 | 1 | -0.0605576 | 12.8937   | 11.7679   | No change |
| NM_027926 | Cpa4          | 0 | 1 | 0.113855   | 0         | 0         | No change |
| NM_027927 | Ints12        | 0 | 1 | 0.219389   | 5.20654   | 5.77214   | No change |
| NM_027976 | Acs15         | 0 | 1 | 0.0756716  | 5.90543   | 5.92372   | No change |
| NM_027983 | Krt33a        | 0 | 1 | 1.11385    | 0         | 0.0427582 | No change |
| NM_027990 | Lypd6b        | 0 | 1 | -0.301183  | 0.457503  | 0.345602  | No change |
| NM_027996 | 2310021P13Rik | 0 | 1 | 0.00956307 | 9.20516   | 8.82017   | No change |
| NM_027997 | Serpina9      | 0 | 1 | -1.88615   | 0.123423  | 0         | No change |
| NM_027998 | Cldn23        | 0 | 1 | 0.561314   | 1.20485   | 1.70654   | No change |
| NM_028001 | Jsrp1         | 0 | 1 | -2.20807   | 0.56204   | 0.0643288 | No change |
| NM_028003 | Rpap3         | 0 | 1 | 0.270111   | 8.32615   | 9.56154   | No change |
| NM_028005 | 2310047M10Rik | 0 | 1 | -0.224015  | 7.00023   | 5.69706   | No change |
| NM_028006 | Tube1         | 0 | 1 | -0.38091   | 0.713823  | 0.514718  | No change |
| NM_028009 | Rpusd1        | 0 | 1 | 0.62405    | 1.30956   | 1.93916   | No change |

|           |               |   |   |             |           |           |           |
|-----------|---------------|---|---|-------------|-----------|-----------|-----------|
| NM_028011 | Tom11l        | 0 | 1 | 0.279706    | 6.52643   | 7.54611   | No change |
| NM_028016 | Nanog         | 0 | 1 | 0.113855    | 0         | 0         | No change |
| NM_028020 | Cpsf3l        | 0 | 1 | 0.13939     | 4.95898   | 5.20003   | No change |
| NM_028021 | Myh14         | 0 | 1 | 0.267101    | 1.25721   | 1.44145   | No change |
| NM_028023 | Cdca4         | 0 | 1 | -0.234501   | 8.70081   | 7.03368   | No change |
| NM_028026 | Wdr73         | 0 | 1 | 0.203231    | 8.73634   | 9.57666   | No change |
| NM_028030 | Rbpms2        | 0 | 1 | -0.248715   | 1.24706   | 0.99098   | No change |
| NM_028033 | 2410012M07Rik | 0 | 1 | -0.886145   | 0.0384195 | 0         | No change |
| NM_028037 | Acad10        | 0 | 1 | 0.247948    | 5.90879   | 6.68146   | No change |
| NM_028038 | Ddx28         | 0 | 1 | -0.346986   | 4.73063   | 3.53007   | No change |
| NM_028040 | Rpusd4        | 0 | 1 | 0.315489    | 4.61517   | 5.47321   | No change |
| NM_028055 | Btbd17        | 0 | 1 | 0.403361    | 0.524239  | 0.667084  | No change |
| NM_028056 | 1600002H07Rik | 0 | 1 | 0.563162    | 1.65858   | 2.34502   | No change |
| NM_028057 | Cyb5r1        | 0 | 1 | 0.314768    | 7.41505   | 8.78623   | No change |
| NM_028071 | Cott1         | 0 | 1 | 0.192806    | 6.76094   | 7.35868   | No change |
| NM_028074 | Ddx42         | 0 | 1 | 0.0693025   | 14.8349   | 14.8163   | No change |
| NM_028079 | 2010111I01Rik | 0 | 1 | 0.186408    | 6.9117    | 7.48803   | No change |
| NM_028085 | Anks4b        | 0 | 1 | -0.139902   | 1.02994   | 0.884125  | No change |
| NM_028089 | Cyp2c55       | 0 | 1 | -0.301183   | 0.105118  | 0.072188  | No change |
| NM_028093 | Entpd8        | 0 | 1 | 0.85082     | 0.241779  | 0.435852  | No change |
| NM_028094 | Ugt2a3        | 0 | 1 | 0.113855    | 0         | 0         | No change |
| NM_028104 | Ppp1r14d      | 0 | 1 | 1.3065      | 0.563555  | 1.4513    | No change |
| NM_028105 | Adck1         | 0 | 1 | -0.367035   | 3.83966   | 2.82518   | No change |
| NM_028112 | Seh1l         | 0 | 1 | -0.0950106  | 8.95103   | 7.9723    | No change |
| NM_028116 | Pygo1         | 0 | 1 | 0.113855    | 0.479264  | 0.493691  | No change |
| NM_028117 | Chst14        | 0 | 1 | -0.00643942 | 0.801452  | 0.756781  | No change |
| NM_028127 | Frm6          | 0 | 1 | 0.144069    | 2.81044   | 2.95664   | No change |
| NM_028135 | Tmem163       | 0 | 1 | -0.886145   | 0.138444  | 0.0570449 | No change |
| NM_028138 | Thumpd2       | 0 | 1 | 0.457157    | 2.4783    | 3.24916   | No change |
| NM_028140 | Mfsd8         | 0 | 1 | 0.0610029   | 3.15229   | 3.12953   | No change |
| NM_028145 | Kihl35        | 0 | 1 | -1.30118    | 0.249923  | 0.0735563 | No change |
| NM_028150 | Supt7l        | 0 | 1 | 0.331446    | 4.45181   | 5.33672   | No change |
| NM_028177 | Ndufab1       | 0 | 1 | 0.0524543   | 2.00367   | 1.97425   | No change |
| NM_028179 | 2200002D01Rik | 0 | 1 | -0.187012   | 11.5468   | 9.62877   | No change |
| NM_028182 | Sh2d4a        | 0 | 1 | -0.127153   | 1.93941   | 1.68645   | No change |
| NM_028184 | Oraov1        | 0 | 1 | 0.0181715   | 6.61709   | 6.37653   | No change |
| NM_028185 | Lsm11         | 0 | 1 | -0.0583262  | 0.853207  | 0.778765  | No change |
| NM_028186 | Nkd2          | 0 | 1 | -0.124305   | 0.973365  | 0.846697  | No change |
| NM_028191 | Cyp2c65       | 0 | 1 | -1.88615    | 0.107717  | 0         | No change |
| NM_028195 | Cyth4         | 0 | 1 | -0.383645   | 2.37221   | 1.72339   | No change |
| NM_028198 | Xpo5          | 0 | 1 | 0.197861    | 8.75624   | 9.56181   | No change |
| NM_028200 | 1300018I17Rik | 0 | 1 | 0.101088    | 5.66772   | 5.78668   | No change |
| NM_028202 | Kbtbd5        | 0 | 1 | -0.886145   | 0.0283882 | 0         | No change |
| NM_028208 | Ptar1         | 0 | 1 | -0.0295094  | 7.46228   | 6.95649   | No change |
| NM_028216 | Psca          | 0 | 1 | -1.14918    | 0.895587  | 0.335472  | No change |
| NM_028226 | Rbm12b        | 0 | 1 | 0.104024    | 12.4823   | 12.7706   | No change |
| NM_028228 | Pinx1         | 0 | 1 | -0.0436865  | 4.43641   | 4.09171   | No change |
| NM_028231 | Kcnmb2        | 0 | 1 | -0.301183   | 0.0716269 | 0.0491887 | No change |
| NM_028233 | Lrpprc        | 0 | 1 | -0.10332    | 14.5539   | 12.8947   | No change |
| NM_028234 | Rbm33         | 0 | 1 | 0.153383    | 6.33039   | 6.7023    | No change |
| NM_028236 | Ceacam18      | 0 | 1 | -2.20807    | 0.143919  | 0         | No change |
| NM_028238 | Rab38         | 0 | 1 | 0.435783    | 0.839674  | 1.09257   | No change |
| NM_028243 | Prcp          | 0 | 1 | -0.0725583  | 4.63209   | 4.19023   | No change |
| NM_028258 | Dzip1l        | 0 | 1 | 0.236712    | 0.780674  | 0.877283  | No change |
| NM_028260 | Immp1l        | 0 | 1 | -0.100996   | 11.5304   | 10.2236   | No change |
| NM_028263 | Fgfbp3        | 0 | 1 | 0.187855    | 0.714392  | 0.776782  | No change |
| NM_028275 | 1700112E06Rik | 0 | 1 | -0.108538   | 0.459009  | 0.394023  | No change |
| NM_028281 | Pcbd2         | 0 | 1 | 0.622868    | 3.19107   | 4.73347   | No change |
| NM_028296 | Car10         | 0 | 1 | 0.113855    | 0         | 0         | No change |
| NM_028299 | 2700029M09Rik | 0 | 1 | 0.14926     | 9.42593   | 9.95243   | No change |
| NM_028312 | Ccdc12        | 0 | 1 | 0.160776    | 10.1865   | 10.843    | No change |
| NM_028317 | 2810030E01Rik | 0 | 1 | -0.0173897  | 0.35142   | 0.32909   | No change |
| NM_028326 | Zfp618        | 0 | 1 | -0.0414234  | 2.35712   | 2.17776   | No change |
| NM_028333 | Angptl1       | 0 | 1 | 0.0641018   | 1.84575   | 1.83575   | No change |
| NM_028335 | Zfp248        | 0 | 1 | 0.310892    | 0.761463  | 0.902044  | No change |
| NM_028347 | Neil1         | 0 | 1 | 0.3065      | 2.02526   | 2.39303   | No change |
| NM_028357 | Vep1          | 0 | 1 | 0.245099    | 0.887119  | 1.00298   | No change |
| NM_028370 | Pot1b         | 0 | 1 | 0.192926    | 2.80843   | 3.05712   | No change |
| NM_028375 | Cxx1c         | 0 | 1 | 0.461778    | 3.1479    | 4.14759   | No change |
| NM_028381 | Ccdc94        | 0 | 1 | 0.0773289   | 2.07009   | 2.07773   | No change |
| NM_028386 | Asphd2        | 0 | 1 | -0.886145   | 0.0439426 | 0         | No change |
| NM_028388 | Ndufv2        | 0 | 1 | -0.0292834  | 94.6915   | 88.3244   | No change |
| NM_028394 | Hspb11        | 0 | 1 | 0.546814    | 2.36881   | 3.33911   | No change |
| NM_028398 | Agxt2l2       | 0 | 1 | 0.376889    | 4.55798   | 5.6418    | No change |
| NM_028402 | Zfp493        | 0 | 1 | 0.166322    | 0.553795  | 0.592407  | No change |
| NM_028404 | Top1mt        | 0 | 1 | -0.404874   | 5.44304   | 3.9021    | No change |



|           |               |   |   |             |           |           |           |
|-----------|---------------|---|---|-------------|-----------|-----------|-----------|
| NM_028416 | Kremen2       | 0 | 1 | -0.886145   | 0.230444  | 0.101735  | No change |
| NM_028417 | Ttc9b         | 0 | 1 | 0.113855    | 0         | 0         | No change |
| NM_028420 | Camk2n2       | 0 | 1 | -1.14918    | 0.597989  | 0.223997  | No change |
| NM_028450 | Gulp1         | 0 | 1 | 0.317388    | 0.749386  | 0.892562  | No change |
| NM_028462 | Fzef1         | 0 | 1 | 0.113855    | 0         | 0         | No change |
| NM_028469 | 3110082117Rik | 0 | 1 | 0.222561    | 5.43805   | 6.044     | No change |
| NM_028472 | Bmper         | 0 | 1 | -0.564217   | 0.128619  | 0.0757089 | No change |
| NM_028473 | 3110079O15Rik | 0 | 1 | 1.11385     | 0         | 0.155392  | No change |
| NM_028474 | 3110082D06Rik | 0 | 1 | 0.113855    | 0.0404603 | 0.0416784 | No change |
| NM_028477 | Prl8a1        | 0 | 1 | 0.113855    | 0         | 0         | No change |
| NM_028480 | Ceacam5       | 0 | 1 | 0.113855    | 0         | 0         | No change |
| NM_028523 | Dcbld2        | 0 | 1 | -0.230299   | 2.97594   | 2.41258   | No change |
| NM_028538 | 1700049G17Rik | 0 | 1 | -0.196485   | 5.85053   | 4.85751   | No change |
| NM_028544 | Rasip1        | 0 | 1 | 0.281582    | 1.59197   | 1.84488   | No change |
| NM_028576 | 1700106N22Rik | 0 | 1 | 0.201318    | 1.50138   | 1.64635   | No change |
| NM_028593 | Cybrd1        | 0 | 1 | -0.606037   | 0.361311  | 0.220556  | No change |
| NM_028597 | Thoc3         | 0 | 1 | -0.164278   | 10.9064   | 9.25937   | No change |
| NM_028598 | 2410076I21Rik | 0 | 1 | -0.224947   | 3.31495   | 2.68301   | No change |
| NM_028599 | Wdr75         | 0 | 1 | 0.194543    | 6.00341   | 6.54144   | No change |
| NM_028604 | Trmt11        | 0 | 1 | 0.246103    | 3.66338   | 4.13886   | No change |
| NM_028607 | Bloc1s2       | 0 | 1 | -0.123837   | 12.1982   | 10.6446   | No change |
| NM_028608 | Glipr1        | 0 | 1 | 0.288353    | 4.44849   | 5.18011   | No change |
| NM_028615 | Dppa2         | 0 | 1 | -1.47111    | 0.0718114 | 0         | No change |
| NM_028621 | Krtap16-7     | 0 | 1 | 0.113855    | 0         | 0         | No change |
| NM_028622 | Lce1c         | 0 | 1 | -1.88615    | 0.288783  | 0         | No change |
| NM_028625 | Lce1a2        | 0 | 1 | 0.113855    | 0         | 0         | No change |
| NM_028628 | Lce1l         | 0 | 1 | 0.113855    | 0         | 0         | No change |
| NM_028629 | Kprp          | 0 | 1 | 0.113855    | 0         | 0         | No change |
| NM_028632 | Fcf1          | 0 | 1 | -0.166253   | 4.86683   | 4.11094   | No change |
| NM_028633 | Haus7         | 0 | 1 | -0.222111   | 14.4492   | 11.7811   | No change |
| NM_028636 | Man2c1        | 0 | 1 | -0.0700094  | 7.57297   | 6.86483   | No change |
| NM_028637 | 1110034G24Rik | 0 | 1 | 0.487313    | 2.03725   | 2.73303   | No change |
| NM_028657 | F630110N24Rik | 0 | 1 | -0.124009   | 5.07751   | 4.42894   | No change |
| NM_028659 | Eif3k         | 0 | 1 | 0.0551087   | 146.779   | 145.161   | No change |
| NM_028660 | Klk9          | 0 | 1 | 0.113855    | 0         | 0         | No change |
| NM_028707 | Psd2          | 0 | 1 | 0.376889    | 0.211879  | 0.265026  | No change |
| NM_028719 | Cpne4         | 0 | 1 | -2.20807    | 0.0762922 | 0         | No change |
| NM_028721 | Nphp3         | 0 | 1 | 0.25946     | 1.32433   | 1.51036   | No change |
| NM_028727 | Nol9          | 0 | 1 | 0.0675612   | 2.87331   | 2.86534   | No change |
| NM_028728 | Nfam1         | 0 | 1 | -0.636167   | 0.909368  | 0.546434  | No change |
| NM_028746 | Slc7a13       | 0 | 1 | 0.113855    | 0         | 0         | No change |
| NM_028754 | 0610037L13Rik | 0 | 1 | 0.0133279   | 9.30138   | 8.93337   | No change |
| NM_028756 | Slc35a5       | 0 | 1 | -0.108237   | 13.2417   | 11.6917   | No change |
| NM_028762 | Rbm19         | 0 | 1 | -0.458724   | 2.02801   | 1.39876   | No change |
| NM_028765 | Acox1         | 0 | 1 | 0.579518    | 0.487193  | 0.702603  | No change |
| NM_028770 | Krt80         | 0 | 1 | 0.698817    | 0.275     | 0.445153  | No change |
| NM_028772 | Dmgdh         | 0 | 1 | -0.886145   | 0.0233947 | 0         | No change |
| NM_028773 | Sash3         | 0 | 1 | -0.22318    | 0.620332  | 0.500092  | No change |
| NM_028775 | Cyp2s1        | 0 | 1 | 0.187855    | 0.478624  | 0.520423  | No change |
| NM_028776 | Scyl3         | 0 | 1 | 0.067713    | 7.05665   | 7.03971   | No change |
| NM_028783 | Robo4         | 0 | 1 | -0.127153   | 0.472302  | 0.408677  | No change |
| NM_028788 | 1300002K09Rik | 0 | 1 | 0.113855    | 0.0579808 | 0.0597263 | No change |
| NM_028791 | Ftsjd2        | 0 | 1 | 0.0799739   | 9.57953   | 9.63843   | No change |
| NM_028798 | Crct1         | 0 | 1 | 0.113855    | 0         | 0         | No change |
| NM_028799 | Tgm5          | 0 | 1 | -1.47111    | 0.0550715 | 0         | No change |
| NM_028803 | Gbe1          | 0 | 1 | -0.327983   | 3.96706   | 3.0018    | No change |
| NM_028804 | Ccdc3         | 0 | 1 | -0.748642   | 0.498181  | 0.270094  | No change |
| NM_028808 | P2ry13        | 0 | 1 | 0.315489    | 1.62654   | 1.93109   | No change |
| NM_028809 | Arpc5l        | 0 | 1 | 0.00928022  | 41.5087   | 39.7646   | No change |
| NM_028821 | Dnalc1        | 0 | 1 | -0.00617589 | 5.74924   | 5.44853   | No change |
| NM_028832 | Mterfd3       | 0 | 1 | -0.0185955  | 5.02572   | 4.71887   | No change |
| NM_028836 | Ctbs          | 0 | 1 | -0.165121   | 12.0352   | 10.2129   | No change |
| NM_028838 | Lrrc2         | 0 | 1 | -2.6935     | 0.114407  | 0         | No change |
| NM_028841 | Tspan17       | 0 | 1 | -0.482789   | 2.73218   | 1.84553   | No change |
| NM_028846 | Usp20         | 0 | 1 | -0.0366368  | 10.6459   | 9.87838   | No change |
| NM_028863 | Isca2         | 0 | 1 | 0.222054    | 25.6932   | 28.5344   | No change |
| NM_028865 | 1110005A03Rik | 0 | 1 | 0.0799075   | 8.58585   | 8.63703   | No change |
| NM_028874 | Snx19         | 0 | 1 | -0.105948   | 10.4898   | 9.27673   | No change |
| NM_028875 | Xrcc3         | 0 | 1 | 0.341522    | 3.33789   | 4.0312    | No change |
| NM_028878 | Slc6a19       | 0 | 1 | -0.234068   | 0.371467  | 0.294346  | No change |
| NM_028880 | Lrrtm1        | 0 | 1 | -0.185705   | 0.414674  | 0.341726  | No change |
| NM_028881 | Crtc2         | 0 | 1 | -0.130768   | 2.863     | 2.48497   | No change |
| NM_028883 | 4632415K11Rik | 0 | 1 | -0.0695913  | 3.60107   | 3.26323   | No change |
| NM_028890 | 4931414P19Rik | 0 | 1 | 0.285807    | 2.10292   | 2.44395   | No change |
| NM_028898 | Rptor         | 0 | 1 | 0.17289     | 4.08184   | 4.38078   | No change |
| NM_028923 | Gle1          | 0 | 1 | -0.283829   | 6.77197   | 5.28962   | No change |

|           |               |   |   |            |           |           |           |
|-----------|---------------|---|---|------------|-----------|-----------|-----------|
| NM_028924 | Tc2n          | 0 | 1 | 0.264721   | 7.10121   | 8.12455   | No change |
| NM_028934 | 4930452B06Rik | 0 | 1 | 0.0313927  | 4.53473   | 4.41028   | No change |
| NM_028964 | Snx29         | 0 | 1 | -0.314988  | 1.46089   | 1.10652   | No change |
| NM_028967 | Batf2         | 0 | 1 | 0.113855   | 0.203335  | 0.209456  | No change |
| NM_028973 | Lrrc15        | 0 | 1 | -1.88615   | 0.0393894 | 0         | No change |
| NM_028974 | Kbtbd13       | 0 | 1 | 0.528892   | 0.187788  | 0.265982  | No change |
| NM_028986 | Gzf1          | 0 | 1 | 0.155907   | 11.9498   | 12.6741   | No change |
| NM_028995 | Nipal3        | 0 | 1 | 0.347445   | 2.27456   | 2.75734   | No change |
| NM_028998 | 9130404H23Rik | 0 | 1 | -0.886145  | 0.0387614 | 0         | No change |
| NM_029002 | Nkx6-3        | 0 | 1 | 0.113855   | 0         | 0         | No change |
| NM_029004 | Rasgef1c      | 0 | 1 | -0.623111  | 0.12423   | 0.0639848 | No change |
| NM_029006 | Kcnk16        | 0 | 1 | 0.113855   | 0         | 0         | No change |
| NM_029008 | 4833403115Rik | 0 | 1 | 0.988324   | 0.108252  | 0.223023  | No change |
| NM_029020 | Abcb8         | 0 | 1 | -0.107398  | 4.97807   | 4.39537   | No change |
| NM_029021 | 4833422F24Rik | 0 | 1 | -1.47111   | 0.0712607 | 0         | No change |
| NM_029023 | Scpep1        | 0 | 1 | -0.0481127 | 11.3579   | 10.4537   | No change |
| NM_029035 | Spsb1         | 0 | 1 | 0.10414    | 6.7776    | 6.93462   | No change |
| NM_029074 | Tmem188       | 0 | 1 | 0.315489   | 7.57036   | 8.97387   | No change |
| NM_029077 | Trim14        | 0 | 1 | 0.125632   | 5.88886   | 6.11627   | No change |
| NM_029084 | Slamf8        | 0 | 1 | -0.77923   | 0.409958  | 0.21115   | No change |
| NM_029091 | Klc4          | 0 | 1 | 0.0575474  | 12.5159   | 12.398    | No change |
| NM_029094 | Pik3cb        | 0 | 1 | 0.122099   | 4.99653   | 5.17652   | No change |
| NM_029095 | Hhat1         | 0 | 1 | 0.0657605  | 2.23614   | 2.22667   | No change |
| NM_029100 | Sepn1         | 0 | 1 | 0.541276   | 1.15312   | 1.60462   | No change |
| NM_029102 | Glt8d2        | 0 | 1 | -0.578023  | 2.68672   | 1.70058   | No change |
| NM_029104 | Zmynd17       | 0 | 1 | -0.365313  | 1.7147    | 1.25605   | No change |
| NM_029106 | 4930408F14Rik | 0 | 1 | -3.20807   | 0.806217  | 0         | No change |
| NM_029128 | Qtrtd1        | 0 | 1 | 0.247121   | 3.80188   | 4.29779   | No change |
| NM_029162 | Zbtb49        | 0 | 1 | -0.208073  | 2.5449    | 2.0924    | No change |
| NM_029166 | Uhrf1bp1l     | 0 | 1 | -0.0473    | 15.9474   | 14.6901   | No change |
| NM_029173 | Nxnl2         | 0 | 1 | 0.265858   | 2.09738   | 2.40744   | No change |
| NM_029182 | Rasd2         | 0 | 1 | 0.276126   | 1.01687   | 1.17523   | No change |
| NM_029186 | Tmem180       | 0 | 1 | 0.528892   | 1.62006   | 2.2356    | No change |
| NM_029203 | Rhox2a        | 0 | 1 | -1.88615   | 0.267023  | 0         | No change |
| NM_029211 | Rnf121        | 0 | 1 | 0.218998   | 13.5826   | 15.0529   | No change |
| NM_029236 | Bcdin3d       | 0 | 1 | 0.132714   | 4.11249   | 4.29277   | No change |
| NM_029238 | Slc35f4       | 0 | 1 | 1.22933    | 0.185255  | 0.457997  | No change |
| NM_029269 | Spp2          | 0 | 1 | 1.11385    | 0         | 0.0825184 | No change |
| NM_029270 | Arhgap24      | 0 | 1 | -0.142921  | 1.89541   | 1.63064   | No change |
| NM_029271 | Mrp132        | 0 | 1 | 0.107978   | 22.2328   | 22.8086   | No change |
| NM_029272 | Ndufs7        | 0 | 1 | 0.247121   | 14.1593   | 16.0062   | No change |
| NM_029279 | Secisbp2      | 0 | 1 | -0.371572  | 3.99544   | 2.93276   | No change |
| NM_029282 | Tti1          | 0 | 1 | -0.0958458 | 10.0881   | 8.98339   | No change |
| NM_029293 | Phpt1         | 0 | 1 | -0.181005  | 39.3293   | 33.0017   | No change |
| NM_029345 | 2310007L24Rik | 0 | 1 | 1.11385    | 0.176661  | 0.454949  | No change |
| NM_029346 | 2310002L13Rik | 0 | 1 | 0.113855   | 0         | 0         | No change |
| NM_029351 | Krtap9-3      | 0 | 1 | -0.886145  | 0.0918221 | 0         | No change |
| NM_029353 | 2410003K15Rik | 0 | 1 | 0.346218   | 9.05564   | 10.9744   | No change |
| NM_029355 | Prl7b1        | 0 | 1 | 0.113855   | 0         | 0         | No change |
| NM_029360 | Tm4sf5        | 0 | 1 | -1.47111   | 0.142813  | 0         | No change |
| NM_029365 | Med25         | 0 | 1 | 0.0266438  | 10.9557   | 10.6216   | No change |
| NM_029383 | Cldn22        | 0 | 1 | -0.985681  | 0.981591  | 0.433346  | No change |
| NM_029385 | Nudt16        | 0 | 1 | 0.649908   | 1.69242   | 2.548     | No change |
| NM_029393 | Krt24         | 0 | 1 | 0.113855   | 0         | 0         | No change |
| NM_029402 | Cul2          | 0 | 1 | 0.25856    | 3.63717   | 4.14378   | No change |
| NM_029415 | Slc10a6       | 0 | 1 | -0.175652  | 0.328121  | 0.270399  | No change |
| NM_029422 | Tm7sf4        | 0 | 1 | 0.3065     | 0.209813  | 0.252151  | No change |
| NM_029427 | Pnpla5        | 0 | 1 | 0.113855   | 0         | 0         | No change |
| NM_029431 | Them4         | 0 | 1 | -0.0355228 | 7.33186   | 6.80562   | No change |
| NM_029440 | Wdr95         | 0 | 1 | -1.47111   | 0.308873  | 0.0867739 | No change |
| NM_029469 | Gsc2          | 0 | 1 | -2.47111   | 0.480641  | 0         | No change |
| NM_029475 | Adal          | 0 | 1 | 0.0173468  | 5.08334   | 4.89554   | No change |
| NM_029491 | Trappc8       | 0 | 1 | -0.0427853 | 14.2583   | 13.1736   | No change |
| NM_029498 | Zmym2         | 0 | 1 | 0.103513   | 15.5988   | 15.9535   | No change |
| NM_029499 | Ms4a4c        | 0 | 1 | -0.674641  | 0.728075  | 0.416663  | No change |
| NM_029509 | Gbp8          | 0 | 1 | 0.291642   | 1.70052   | 1.98527   | No change |
| NM_029529 | Slc35d3       | 0 | 1 | 1.11385    | 0         | 0.0273073 | No change |
| NM_029530 | 6330527O06Rik | 0 | 1 | 0.573286   | 0.534728  | 0.771156  | No change |
| NM_029536 | Gpr165        | 0 | 1 | 0.698817   | 0.02182   | 0.0449536 | No change |
| NM_029537 | Tmem98        | 0 | 1 | -0.301183  | 1.15071   | 0.876128  | No change |
| NM_029545 | 6530401N04Rik | 0 | 1 | 0.255874   | 3.91411   | 4.45194   | No change |
| NM_029546 | Pwp2          | 0 | 1 | -0.0283438 | 4.96907   | 4.63646   | No change |
| NM_029548 | Rph3al        | 0 | 1 | -0.725681  | 2.47032   | 1.38801   | No change |
| NM_029550 | Keg1          | 0 | 1 | 1.43578    | 0.125497  | 0.387826  | No change |
| NM_029553 | Ttc8          | 0 | 1 | 0.0863741  | 3.21236   | 3.24604   | No change |
| NM_029554 | 0610040J01Rik | 0 | 1 | 0.251358   | 0.335421  | 0.383909  | No change |

|           |               |   |   |             |           |           |           |
|-----------|---------------|---|---|-------------|-----------|-----------|-----------|
| NM_029556 | Clybl         | 0 | 1 | -0.0448429  | 2.63946   | 2.42967   | No change |
| NM_029557 | Tsen54        | 0 | 1 | 0.528892    | 2.19116   | 3.02163   | No change |
| NM_029568 | Mfap4         | 0 | 1 | 0.210531    | 4.60627   | 5.07709   | No change |
| NM_029569 | Asb5          | 0 | 1 | -0.530001   | 1.0593    | 0.681992  | No change |
| NM_029570 | Atp11b        | 0 | 1 | 0.153656    | 6.13252   | 6.49425   | No change |
| NM_029571 | Kti12         | 0 | 1 | 0.230264    | 5.2852    | 5.90568   | No change |
| NM_029580 | Trmt5         | 0 | 1 | -0.151334   | 11.1492   | 9.54919   | No change |
| NM_029581 | Mtif3         | 0 | 1 | -0.0745903  | 10.3813   | 9.37991   | No change |
| NM_029584 | Zfp773        | 0 | 1 | 1.22933     | 0.115195  | 0.284791  | No change |
| NM_029585 | Det1          | 0 | 1 | 0.336247    | 3.92946   | 4.72778   | No change |
| NM_029613 | Krtap4-7      | 0 | 1 | 0.113855    | 0         | 0         | No change |
| NM_029619 | Msrb2         | 0 | 1 | 0.545966    | 3.63106   | 5.0676    | No change |
| NM_029620 | Pcolce2       | 0 | 1 | -0.538222   | 0.784326  | 0.500151  | No change |
| NM_029623 | 3110002H16Rik | 0 | 1 | 0.428365    | 2.5206    | 3.23717   | No change |
| NM_029628 | Ppp1r3g       | 0 | 1 | -0.886145   | 0.0301962 | 0         | No change |
| NM_029629 | Fahd2a        | 0 | 1 | 0.135485    | 18.7591   | 19.6166   | No change |
| NM_029635 | Commd9        | 0 | 1 | 0.333636    | 9.31216   | 11.1811   | No change |
| NM_029636 | Ctsq          | 0 | 1 | 1.52889     | 0.105118  | 0.378987  | No change |
| NM_029643 | Gpr172b       | 0 | 1 | 0.0841075   | 3.76858   | 3.80226   | No change |
| NM_029645 | Gatc          | 0 | 1 | 0.000198029 | 10.3147   | 9.81722   | No change |
| NM_029665 | Ipo11         | 0 | 1 | -0.0955986  | 12.0278   | 10.7133   | No change |
| NM_029667 | Lce1i         | 0 | 1 | 0.113855    | 0         | 0         | No change |
| NM_029706 | Cpb1          | 0 | 1 | -1.47111    | 0.0932971 | 0         | No change |
| NM_029720 | Crel2         | 0 | 1 | 0.113855    | 33.518    | 34.527    | No change |
| NM_029722 | Gje1          | 0 | 1 | -1.76061    | 0.471855  | 0.0972119 | No change |
| NM_029726 | Trdn          | 0 | 1 | -1.88615    | 0.108075  | 0.0159041 | No change |
| NM_029727 | Gsdma2        | 0 | 1 | -0.886145   | 0.0418325 | 0         | No change |
| NM_029733 | 2010005H15Rik | 0 | 1 | 0.113855    | 0         | 0         | No change |
| NM_029741 | Ppfia3        | 0 | 1 | 0.791927    | 0.272126  | 0.457361  | No change |
| NM_029746 | Cog2          | 0 | 1 | -0.257401   | 5.84888   | 4.65218   | No change |
| NM_029747 | 2410137M14Rik | 0 | 1 | -2.20807    | 0.322279  | 0         | No change |
| NM_029760 | Nubpl         | 0 | 1 | -0.192807   | 2.68724   | 2.22654   | No change |
| NM_029771 | Gpr30         | 0 | 1 | 0.325359    | 3.66659   | 4.37785   | No change |
| NM_029775 | Dcun1d5       | 0 | 1 | 0.0124528   | 12.7664   | 12.2541   | No change |
| NM_029784 | Fam81a        | 0 | 1 | 0.659289    | 0.870255  | 1.31978   | No change |
| NM_029788 | Rnft1         | 0 | 1 | -0.0950544  | 7.79605   | 6.94595   | No change |
| NM_029793 | Golga1        | 0 | 1 | 0.127705    | 14.8094   | 15.4025   | No change |
| NM_029797 | Mnd1          | 0 | 1 | -0.679694   | 1.99351   | 1.14997   | No change |
| NM_029798 | Flywch2       | 0 | 1 | 0.290178    | 10.0285   | 11.6869   | No change |
| NM_029803 | Ifi2712a      | 0 | 1 | 0.173976    | 6.92414   | 7.44269   | No change |
| NM_029806 | Lypd5         | 0 | 1 | -1.88615    | 0.223614  | 0         | No change |
| NM_029809 | 2310014L17Rik | 0 | 1 | 0.576827    | 0.774605  | 1.10823   | No change |
| NM_029821 | 1190003J15Rik | 0 | 1 | -1.88615    | 1.13574   | 0.212714  | No change |
| NM_029825 | Scfd1         | 0 | 1 | 0.124995    | 4.26623   | 4.429     | No change |
| NM_029834 | Ppp1r12c      | 0 | 1 | -0.0817631  | 16.1962   | 14.5652   | No change |
| NM_029838 | Col25a1       | 0 | 1 | -0.886145   | 0.0264289 | 0         | No change |
| NM_029841 | 2510039O18Rik | 0 | 1 | 0.117245    | 10.8201   | 11.1722   | No change |
| NM_029842 | Jmjd5         | 0 | 1 | -0.171547   | 1.08361   | 0.910606  | No change |
| NM_029861 | Cnrip1        | 0 | 1 | -0.14918    | 0.769838  | 0.653069  | No change |
| NM_029868 | Gpbp111       | 0 | 1 | -0.0178314  | 21.5476   | 20.2582   | No change |
| NM_029870 | A930001N09Rik | 0 | 1 | 0.0337981   | 23.7235   | 23.118    | No change |
| NM_029875 | Slc35e3       | 0 | 1 | 0.293404    | 1.64078   | 1.9169    | No change |
| NM_029879 | Rgs7bp        | 0 | 1 | 0.765932    | 0.155458  | 0.258684  | No change |
| NM_029894 | Fam162b       | 0 | 1 | 0.113855    | 0         | 0         | No change |
| NM_029901 | Akr1c21       | 0 | 1 | 0.113855    | 0.345871  | 0.356283  | No change |
| NM_029906 | 9530003J23Rik | 0 | 1 | -1.88615    | 0.171517  | 0         | No change |
| NM_029909 | C330018D20Rik | 0 | 1 | 0.311087    | 4.50564   | 5.32556   | No change |
| NM_029921 | Tmem213       | 0 | 1 | 1.43578     | 0.131496  | 0.541819  | No change |
| NM_029924 | Mbd5          | 0 | 1 | 0.136223    | 3.78347   | 3.95842   | No change |
| NM_029926 | Irak4         | 0 | 1 | 0.666396    | 0.715685  | 1.09313   | No change |
| NM_029932 | Spns3         | 0 | 1 | -0.886145   | 0.421453  | 0.197336  | No change |
| NM_029933 | Bcl9          | 0 | 1 | 0.0524543   | 1.42322   | 1.40434   | No change |
| NM_029935 | Chst15        | 0 | 1 | -0.138532   | 1.30725   | 1.12778   | No change |
| NM_029938 | H2afv         | 0 | 1 | 0.234569    | 11.6723   | 13.0768   | No change |
| NM_029942 | Preli2        | 0 | 1 | 0.809       | 1.92522   | 3.27224   | No change |
| NM_029943 | Apex2         | 0 | 1 | 0.379445    | 3.43843   | 4.26556   | No change |
| NM_029949 | Snappc3       | 0 | 1 | 0.167294    | 5.28358   | 5.64998   | No change |
| NM_029952 | Zfp955a       | 0 | 1 | 0.155594    | 9.46562   | 10.0374   | No change |
| NM_029961 | Abcb5         | 0 | 1 | 0.154804    | 9.34993   | 9.90923   | No change |
| NM_029963 | Mrps5         | 0 | 1 | -0.10027    | 4.17963   | 3.70469   | No change |
| NM_029964 | 6030468B19Rik | 0 | 1 | -0.886145   | 0.0646502 | 0         | No change |
| NM_029967 | Adamts1       | 0 | 1 | -0.02587    | 1.14688   | 1.07151   | No change |
| NM_029972 | Ernm          | 0 | 1 | 0.113855    | 0         | 0         | No change |
| NM_029981 | Adamts2       | 0 | 1 | 0.528892    | 0.300957  | 0.420737  | No change |
| NM_029984 | Fam159b       | 0 | 1 | 0.113855    | 0         | 0         | No change |
| NM_029987 | Rpe65         | 0 | 1 | 0.113855    | 0         | 0         | No change |

|           |               |   |   |             |           |           |           |
|-----------|---------------|---|---|-------------|-----------|-----------|-----------|
| NM_029993 | Mlana         | 0 | 1 | 0.113855    | 0         | 0         | No change |
| NM_030018 | Tmem50b       | 0 | 1 | 0.0794499   | 30.5808   | 30.7583   | No change |
| NM_030022 | Grifin        | 0 | 1 | 0.113855    | 0         | 0         | No change |
| NM_030037 | Mospd3        | 0 | 1 | 0.497183    | 1.05741   | 1.43582   | No change |
| NM_030060 | Batf3         | 0 | 1 | -0.301183   | 0.29365   | 0.20166   | No change |
| NM_030064 | Phf23         | 0 | 1 | 0.0318392   | 13.115    | 12.7613   | No change |
| NM_030067 | Gpr115        | 0 | 1 | -2.20807    | 0.0911019 | 0         | No change |
| NM_030075 | Klhdc8b       | 0 | 1 | 0.305336    | 3.63451   | 4.27877   | No change |
| NM_030081 | Zfyve20       | 0 | 1 | 0.106425    | 7.78371   | 7.97677   | No change |
| NM_030083 | Lsmc1         | 0 | 1 | -0.16178    | 33.9047   | 28.8273   | No change |
| NM_030093 | Snmp25        | 0 | 1 | -0.0319961  | 4.27204   | 3.96921   | No change |
| NM_030096 | Ddx52         | 0 | 1 | 0.0911347   | 8.43628   | 8.55411   | No change |
| NM_030098 | Rnase6        | 0 | 1 | 0.381788    | 3.12349   | 3.88784   | No change |
| NM_030101 | Pgpep1l       | 0 | 1 | -1.47111    | 0.364884  | 0.0751738 | No change |
| NM_030110 | Efha2         | 0 | 1 | -0.0612319  | 2.9643    | 2.70205   | No change |
| NM_030112 | Rtf1          | 0 | 1 | -0.159827   | 4.04948   | 3.44794   | No change |
| NM_030133 | Srbd1         | 0 | 1 | 0.160548    | 5.98214   | 6.3656    | No change |
| NM_030139 | Zfp449        | 0 | 1 | 0.504314    | 1.36104   | 1.84375   | No change |
| NM_030152 | Nol3          | 0 | 1 | 0.224886    | 1.79759   | 2.00184   | No change |
| NM_030166 | Galntl2       | 0 | 1 | 0.67457     | 1.16105   | 1.77867   | No change |
| NM_030174 | Mctp1         | 0 | 1 | 0.298279    | 0.341234  | 0.401721  | No change |
| NM_030178 | Brpf1         | 0 | 1 | -0.11501    | 7.59858   | 6.67672   | No change |
| NM_030180 | Usp54         | 0 | 1 | -0.126132   | 8.25156   | 7.19568   | No change |
| NM_030185 | Zcchc4        | 0 | 1 | -0.426714   | 1.12291   | 0.783581  | No change |
| NM_030198 | Gins3         | 0 | 1 | -0.241626   | 2.48491   | 1.99419   | No change |
| NM_030208 | 2310079F23Rik | 0 | 1 | -0.202619   | 3.62831   | 2.99761   | No change |
| NM_030218 | 9130017N09Rik | 0 | 1 | -0.793036   | 0.402019  | 0.207061  | No change |
| NM_030225 | Dlst          | 0 | 1 | -0.0539365  | 23.3737   | 21.4309   | No change |
| NM_030229 | Polr3h        | 0 | 1 | -0.188993   | 9.34229   | 7.79592   | No change |
| NM_030233 | Saal1         | 0 | 1 | -0.229447   | 2.50651   | 2.03196   | No change |
| NM_030234 | Wdr76         | 0 | 1 | 0.0372335   | 0.936027  | 0.913457  | No change |
| NM_030239 | Abcg3         | 0 | 1 | -0.00162241 | 0.275648  | 0.260284  | No change |
| NM_030240 | 2900092E17Rik | 0 | 1 | -0.0603961  | 8.19336   | 7.47399   | No change |
| NM_030244 | Ier5l         | 0 | 1 | 0.113855    | 0.357629  | 0.368395  | No change |
| NM_030245 | Tada1         | 0 | 1 | -0.269474   | 8.74412   | 6.89783   | No change |
| NM_030248 | Cdk5rap3      | 0 | 1 | 0.0634184   | 30.256    | 30.0948   | No change |
| NM_030251 | Abtb1         | 0 | 1 | -0.0522786  | 10.5281   | 9.66123   | No change |
| NM_030252 | BC003266      | 0 | 1 | 0.0244197   | 12.4111   | 12.012    | No change |
| NM_030254 | Tusc3         | 0 | 1 | 0.120858    | 18.8857   | 19.5492   | No change |
| NM_030257 | Lysmd3        | 0 | 1 | 0.165385    | 4.88252   | 5.21323   | No change |
| NM_030259 | Rilpl2        | 0 | 1 | -0.234068   | 10.0114   | 8.09073   | No change |
| NM_030553 | Olfrl160      | 0 | 1 | 0.113855    | 0         | 0         | No change |
| NM_030559 | Vps16         | 0 | 1 | 0.0994995   | 4.3694    | 4.45615   | No change |
| NM_030564 | Rnf34         | 0 | 1 | -0.122918   | 27.5348   | 24.065    | No change |
| NM_030566 | Rabep2        | 0 | 1 | -0.0800871  | 4.33694   | 3.90199   | No change |
| NM_030596 | Dsg3          | 0 | 1 | 0.113855    | 0         | 0         | No change |
| NM_030599 | Klrb1b        | 0 | 1 | -0.108538   | 0.409588  | 0.357008  | No change |
| NM_030610 | Fgf20         | 0 | 1 | 0.113855    | 0         | 0         | No change |
| NM_030611 | Akr1c6        | 0 | 1 | 0.113855    | 0         | 0         | No change |
| NM_030614 | Fgf16         | 0 | 1 | 0.113855    | 0.0229253 | 0.0236155 | No change |
| NM_030677 | Gpx2          | 0 | 1 | 1.69882     | 0.0653167 | 0.336415  | No change |
| NM_030679 | Myh1          | 0 | 1 | -1.47111    | 0.266313  | 0.0834917 | No change |
| NM_030686 | Dhrs4         | 0 | 1 | 0.559655    | 4.2037    | 5.9256    | No change |
| NM_030688 | Il1rapl2      | 0 | 1 | 0.113855    | 0         | 0         | No change |
| NM_030691 | Igsf6         | 0 | 1 | 0.329123    | 2.80994   | 3.36573   | No change |
| NM_030701 | Niacr1        | 0 | 1 | 1.11385     | 0.178975  | 0.405599  | No change |
| NM_030709 | Tmprss5       | 0 | 1 | -2.05607    | 0.271972  | 0.03502   | No change |
| NM_030712 | Cxcr6         | 0 | 1 | 0.162218    | 3.203     | 3.4132    | No change |
| NM_030719 | Gatsl2        | 0 | 1 | 0.397162    | 1.5422    | 1.93662   | No change |
| NM_030720 | Gpr84         | 0 | 1 | -0.175652   | 0.449342  | 0.370295  | No change |
| NM_030725 | Syt13         | 0 | 1 | -0.886145   | 0.315857  | 0.153113  | No change |
| NM_030726 | Mrgprh        | 0 | 1 | 0.113855    | 0.0385257 | 0.0396854 | No change |
| NM_030727 | Slc26a5       | 0 | 1 | 0.113855    | 0         | 0         | No change |
| NM_030728 | 9930013L23Rik | 0 | 1 | 0.180306    | 2.89979   | 3.12837   | No change |
| NM_030731 | Trim23        | 0 | 1 | 0.00908249  | 6.75979   | 6.47434   | No change |
| NM_030734 | Defb5         | 0 | 1 | 0.113855    | 0         | 0         | No change |
| NM_030735 | Vmn1r172      | 0 | 1 | 0.113855    | 0         | 0         | No change |
| NM_030736 | Vmn1r148      | 0 | 1 | -0.886145   | 0.0285861 | 0         | No change |
| NM_030737 | Vmn1r171      | 0 | 1 | 0.113855    | 0         | 0         | No change |
| NM_030738 | Vmn1r65       | 0 | 1 | -2.47111    | 0.129927  | 0         | No change |
| NM_030739 | Vmn1r58       | 0 | 1 | 0.113855    | 0.104019  | 0.107151  | No change |
| NM_030740 | Vmn1r56       | 0 | 1 | 0.113855    | 0.038042  | 0.0391872 | No change |
| NM_030741 | Vmn1r62       | 0 | 1 | -1.47111    | 0.0699026 | 0         | No change |
| NM_030742 | Vmn1r63       | 0 | 1 | 0.113855    | 0         | 0         | No change |
| NM_030746 | Btn3a3        | 0 | 1 | 0.113855    | 0         | 0         | No change |
| NM_030747 | Btnl6         | 0 | 1 | -0.886145   | 0.0430203 | 0         | No change |

|           |          |   |   |            |           |           |           |
|-----------|----------|---|---|------------|-----------|-----------|-----------|
| NM_030749 | Sil1     | 0 | 1 | 0.0362108  | 64.1552   | 62.6217   | No change |
| NM_030889 | Sorcs2   | 0 | 1 | 0.0186976  | 3.99568   | 3.85244   | No change |
| NM_030890 | Prrt1    | 0 | 1 | 0.715305   | 2.11879   | 3.3518    | No change |
| NM_031161 | Cck      | 0 | 1 | 0.113855   | 0         | 0         | No change |
| NM_031164 | F13b     | 0 | 1 | -2.20807   | 0.11723   | 0         | No change |
| NM_031168 | Il6      | 0 | 1 | -1.47111   | 0.12823   | 0         | No change |
| NM_031169 | Kcnmb1   | 0 | 1 | 0.146276   | 0.715567  | 0.754251  | No change |
| NM_031178 | Tlr9     | 0 | 1 | -0.264657  | 0.501966  | 0.392979  | No change |
| NM_031180 | Klb      | 0 | 1 | -1.88615   | 0.22292   | 0.0417511 | No change |
| NM_031181 | Siglece  | 0 | 1 | 0.599282   | 0.527691  | 0.776538  | No change |
| NM_031183 | Sp6      | 0 | 1 | 0.785232   | 0.536894  | 0.893399  | No change |
| NM_031184 | Glis2    | 0 | 1 | 0.136575   | 1.19397   | 1.24975   | No change |
| NM_031187 | Tpsab1   | 0 | 1 | 0.113855   | 0         | 0         | No change |
| NM_031189 | Myog     | 0 | 1 | 0.113855   | 0         | 0         | No change |
| NM_031191 | Prl2c2   | 0 | 1 | -0.248715  | 0.705751  | 0.545248  | No change |
| NM_031192 | Ren1     | 0 | 1 | -2.20807   | 0.196042  | 0         | No change |
| NM_031193 | Ren2     | 0 | 1 | -2.20807   | 0.182801  | 0         | No change |
| NM_031197 | Slc2a2   | 0 | 1 | -0.314988  | 0.922008  | 0.698356  | No change |
| NM_031198 | Tcfec    | 0 | 1 | -0.6935    | 0.235052  | 0.121064  | No change |
| NM_031199 | Tgfa     | 0 | 1 | 0.157247   | 2.14237   | 2.27477   | No change |
| NM_031202 | Tyrp1    | 0 | 1 | 0.113855   | 0         | 0         | No change |
| NM_031247 | Gimap3   | 0 | 1 | 0.143001   | 1.55956   | 1.63998   | No change |
| NM_031249 | Cstf2t   | 0 | 1 | -0.0942534 | 17.4047   | 15.5177   | No change |
| NM_031250 | Ucn3     | 0 | 1 | 0.113855   | 0         | 0         | No change |
| NM_031251 | Ctns     | 0 | 1 | 0.0297905  | 6.1126    | 5.93885   | No change |
| NM_031252 | Il23a    | 0 | 1 | 0.698817   | 0.256413  | 0.422611  | No change |
| NM_031367 | H28      | 0 | 1 | 0.113855   | 0         | 0         | No change |
| NM_031373 | Ogfr     | 0 | 1 | 0.155785   | 11.3312   | 12.0175   | No change |
| NM_031376 | Pik3ap1  | 0 | 1 | -0.55357   | 2.1321    | 1.37268   | No change |
| NM_031378 | Gsdmc    | 0 | 1 | -3.05607   | 0.234065  | 0         | No change |
| NM_031397 | Bicc1    | 0 | 1 | -0.194776  | 3.01545   | 2.50353   | No change |
| NM_031404 | Actf6b   | 0 | 1 | -0.886145  | 0.0450213 | 0         | No change |
| NM_031499 | Prp2     | 0 | 1 | 0.113855   | 0         | 0         | No change |
| NM_031842 | Smarcd1  | 0 | 1 | -0.162355  | 2.89558   | 2.45906   | No change |
| NM_031843 | Dpp7     | 0 | 1 | 0.225748   | 2.56874   | 2.86296   | No change |
| NM_031872 | Tas1r3   | 0 | 1 | -0.262294  | 2.40115   | 1.90107   | No change |
| NM_031873 | Tas1r2   | 0 | 1 | 1.11385    | 0         | 0.0235689 | No change |
| NM_031884 | Abcg5    | 0 | 1 | 0.961852   | 0.123187  | 0.25379   | No change |
| NM_032006 | Mmp1a    | 0 | 1 | 0.113855   | 0         | 0         | No change |
| NM_032007 | Mmp1b    | 0 | 1 | -0.623111  | 0.139595  | 0.0718988 | No change |
| NM_032397 | Kcnn1    | 0 | 1 | -0.319105  | 0.448297  | 0.337464  | No change |
| NM_032398 | Plvap    | 0 | 1 | 0.296719   | 1.24452   | 1.46003   | No change |
| NM_032399 | Gpr87    | 0 | 1 | 0.34832    | 0.958802  | 1.17285   | No change |
| NM_032400 | Sucnr1   | 0 | 1 | 1.11385    | 0         | 0.0456976 | No change |
| NM_032540 | Kel      | 0 | 1 | -2.88615   | 0.193899  | 0         | No change |
| NM_032541 | Hamp     | 0 | 1 | -1.47111   | 0.353771  | 0         | No change |
| NM_032542 | Sval2    | 0 | 1 | -0.886145  | 0.160214  | 0         | No change |
| NM_032544 | Gtpbp3   | 0 | 1 | 0.425799   | 2.14057   | 2.74344   | No change |
| NM_033039 | Ocm      | 0 | 1 | 0.113855   | 0         | 0         | No change |
| NM_033041 | Hes7     | 0 | 1 | 0.113855   | 0         | 0         | No change |
| NM_033042 | Tnfrsf25 | 0 | 1 | -0.793036  | 0.608672  | 0.313498  | No change |
| NM_033072 | Mbd6     | 0 | 1 | -0.0690092 | 3.60006   | 3.26484   | No change |
| NM_033144 | Sept8    | 0 | 1 | 0.197919   | 2.27575   | 2.48586   | No change |
| NM_033175 | Lce3c    | 0 | 1 | 0.113855   | 0         | 0         | No change |
| NM_033269 | Chrm3    | 0 | 1 | -1.47111   | 0.0439981 | 0         | No change |
| NM_033321 | P2rx5    | 0 | 1 | -1.6935    | 0.182761  | 0.0313772 | No change |
| NM_033324 | Dgcr8    | 0 | 1 | -0.061995  | 9.03946   | 8.24109   | No change |
| NM_033374 | Dock2    | 0 | 1 | -0.277724  | 2.692     | 2.11116   | No change |
| NM_033476 | Tcfcp2   | 0 | 1 | 0.144716   | 8.05661   | 8.47907   | No change |
| NM_033509 | Vangl2   | 0 | 1 | 0.585923   | 0.925128  | 1.33417   | No change |
| NM_033521 | Laptm4b  | 0 | 1 | -0.0253906 | 24.3209   | 22.7445   | No change |
| NM_033522 | Ferd3l   | 0 | 1 | -0.886145  | 0.0787491 | 0         | No change |
| NM_033523 | Spred2   | 0 | 1 | 0.385157   | 2.08691   | 2.59967   | No change |
| NM_033526 | Ubqln4   | 0 | 1 | 0.0693802  | 11.5535   | 11.5394   | No change |
| NM_033541 | Oas1c    | 0 | 1 | 0.361782   | 1.43288   | 1.75866   | No change |
| NM_033552 | Slc4a10  | 0 | 1 | 0.528892   | 0.218715  | 0.304817  | No change |
| NM_033561 | Eif4h    | 0 | 1 | 0.0397651  | 73.9457   | 72.3572   | No change |
| NM_033567 | Cecr6    | 0 | 1 | -0.886145  | 0.0429408 | 0.0147445 | No change |
| NM_033568 | Snf8     | 0 | 1 | 0.0006442  | 11.6278   | 11.0681   | No change |
| NM_033573 | Prcc     | 0 | 1 | -0.0733151 | 8.89408   | 8.04283   | No change |
| NM_033601 | Bcl3     | 0 | 1 | -0.964148  | 0.683636  | 0.312985  | No change |
| NM_033603 | Amn      | 0 | 1 | -1.47111   | 0.206804  | 0.0426059 | No change |
| NM_033605 | Dach2    | 0 | 1 | 0.528892   | 0.670569  | 0.928948  | No change |
| NM_033606 | Dqx1     | 0 | 1 | 0.566367   | 0.397237  | 0.568326  | No change |
| NM_033610 | Sncb     | 0 | 1 | -0.886145  | 0.0582717 | 0         | No change |
| NM_033622 | Tnfsf13b | 0 | 1 | 0.376889   | 0.574618  | 0.718755  | No change |

|           |               |   |   |            |           |           |           |
|-----------|---------------|---|---|------------|-----------|-----------|-----------|
| NM_033652 | Lmx1a         | 0 | 1 | 0.113855   | 0         | 0         | No change |
| NM_052977 | Adarb2        | 0 | 1 | 0.85082    | 0.0255473 | 0.0526327 | No change |
| NM_053008 | Olig3         | 0 | 1 | 0.113855   | 0         | 0         | No change |
| NM_053014 | Agpat3        | 0 | 1 | 0.034471   | 87.0402   | 84.8591   | No change |
| NM_053077 | Slc45a2       | 0 | 1 | -1.47111   | 0.0467267 | 0         | No change |
| NM_053079 | Slc15a1       | 0 | 1 | -0.0560702 | 0.379372  | 0.344817  | No change |
| NM_053080 | Aldh1a3       | 0 | 1 | 0.192465   | 2.54174   | 2.76606   | No change |
| NM_053082 | Tspan4        | 0 | 1 | 0.396585   | 4.57941   | 5.74917   | No change |
| NM_053085 | Tcf23         | 0 | 1 | 0.318213   | 0.764736  | 0.910298  | No change |
| NM_053087 | Epgn          | 0 | 1 | -0.886145  | 0.0408996 | 0         | No change |
| NM_053088 | Ifitm5        | 0 | 1 | 0.92121    | 0.294893  | 0.60754   | No change |
| NM_053091 | Cox4i2        | 0 | 1 | -0.623111  | 0.383455  | 0.197499  | No change |
| NM_053093 | Tac4          | 0 | 1 | -0.388646  | 0.894216  | 0.63328   | No change |
| NM_053095 | Il24          | 0 | 1 | 1.11385    | 0         | 0.0643288 | No change |
| NM_053096 | Cml2          | 0 | 1 | -0.493828  | 0.658683  | 0.43775   | No change |
| NM_053098 | Lmod2         | 0 | 1 | 1.69882    | 0         | 0.0729954 | No change |
| NM_053105 | Klhl1         | 0 | 1 | 0.113855   | 0         | 0         | No change |
| NM_053106 | Lmod1         | 0 | 1 | 0.435783   | 1.60884   | 2.07615   | No change |
| NM_053107 | Gpr45         | 0 | 1 | 0.113855   | 0.0180552 | 0.0185987 | No change |
| NM_053111 | Ear6          | 0 | 1 | 0.113855   | 0         | 0         | No change |
| NM_053112 | Ear10         | 0 | 1 | -0.886145  | 0.147968  | 0         | No change |
| NM_053113 | Ear11         | 0 | 1 | 0.113855   | 0         | 0         | No change |
| NM_053114 | Pabpc5        | 0 | 1 | -0.108538  | 0.171799  | 0.147475  | No change |
| NM_053116 | Wnt16         | 0 | 1 | 1.11385    | 0.083665  | 0.215459  | No change |
| NM_053117 | Pard6g        | 0 | 1 | 0.0898093  | 2.66088   | 2.6953    | No change |
| NM_053123 | Smarca1       | 0 | 1 | 0.025386   | 4.60609   | 4.46149   | No change |
| NM_053124 | Smarca5       | 0 | 1 | -0.0665582 | 18.137    | 16.485    | No change |
| NM_053127 | Pcdhb2        | 0 | 1 | -0.14918   | 0.125573  | 0.103482  | No change |
| NM_053129 | Pcdhb4        | 0 | 1 | -1.20807   | 0.356054  | 0.135127  | No change |
| NM_053130 | Pcdhb5        | 0 | 1 | 1.52889    | 0.0986314 | 0.304802  | No change |
| NM_053131 | Pcdhb6        | 0 | 1 | 0.476425   | 0.180318  | 0.247662  | No change |
| NM_053133 | Pcdhb8        | 0 | 1 | -0.400718  | 0.26805   | 0.184079  | No change |
| NM_053134 | Pcdhb9        | 0 | 1 | 0.476425   | 0.456255  | 0.610987  | No change |
| NM_053135 | Pcdhb10       | 0 | 1 | 0.435783   | 0.0735934 | 0.101078  | No change |
| NM_053136 | Pcdhb11       | 0 | 1 | 0.884373   | 0.308461  | 0.556057  | No change |
| NM_053137 | Pcdhb12       | 0 | 1 | -0.156234  | 0.918826  | 0.780851  | No change |
| NM_053138 | Pcdhb13       | 0 | 1 | -0.433633  | 0.339689  | 0.233277  | No change |
| NM_053140 | Pcdhb15       | 0 | 1 | 0.661343   | 0.299218  | 0.462339  | No change |
| NM_053145 | Pcdhb20       | 0 | 1 | 0.206964   | 0.902705  | 0.993281  | No change |
| NM_053146 | Pcdhb21       | 0 | 1 | 0.113855   | 0.693846  | 0.714733  | No change |
| NM_053151 | Klra21        | 0 | 1 | -1.88615   | 0.428315  | 0.0630298 | No change |
| NM_053152 | Klra22        | 0 | 1 | 1.11385    | 0         | 0.0582246 | No change |
| NM_053153 | Klra18        | 0 | 1 | 0.113855   | 0         | 0         | No change |
| NM_053154 | Klra19        | 0 | 1 | 1.69882    | 0         | 0.129821  | No change |
| NM_053159 | Mrpl3         | 0 | 1 | 0.124197   | 6.28192   | 6.51793   | No change |
| NM_053165 | Clec2h        | 0 | 1 | 1.11385    | 0.0322652 | 0.0997097 | No change |
| NM_053166 | Trim7         | 0 | 1 | 0.0438923  | 8.57131   | 8.4089    | No change |
| NM_053171 | Csmd1         | 0 | 1 | 0.310078   | 0.732171  | 0.86483   | No change |
| NM_053172 | Mepe          | 0 | 1 | -0.886145  | 0.0414346 | 0         | No change |
| NM_053176 | Hrg           | 0 | 1 | 0.113855   | 0.0401226 | 0.0413304 | No change |
| NM_053184 | Ugt2a1        | 0 | 1 | 0.113855   | 0         | 0         | No change |
| NM_053190 | S1pr5         | 0 | 1 | -2.20807   | 0.111732  | 0         | No change |
| NM_053198 | Sfxn4         | 0 | 1 | 0.537663   | 1.02077   | 1.41952   | No change |
| NM_053199 | Cadm3         | 0 | 1 | 0.791927   | 0.150814  | 0.258924  | No change |
| NM_053200 | Ces1d         | 0 | 1 | 0.161344   | 17.9727   | 19.1345   | No change |
| NM_053205 | Taar1         | 0 | 1 | 0.113855   | 0         | 0         | No change |
| NM_053211 | Tas2r103      | 0 | 1 | 0.113855   | 0         | 0         | No change |
| NM_053212 | Tas2r116      | 0 | 1 | 0.113855   | 0         | 0         | No change |
| NM_053214 | Myo1f         | 0 | 1 | 0.113855   | 0.418194  | 0.430783  | No change |
| NM_053215 | Ugt2b37       | 0 | 1 | 0.113855   | 0         | 0         | No change |
| NM_053217 | 2010002M12Rik | 0 | 1 | 0.988324   | 0.103556  | 0.213346  | No change |
| NM_053218 | Vmn1r48       | 0 | 1 | 0.113855   | 0         | 0         | No change |
| NM_053219 | Vmn1r47       | 0 | 1 | 0.113855   | 0         | 0         | No change |
| NM_053221 | Vmn1r42       | 0 | 1 | -0.886145  | 0.073984  | 0         | No change |
| NM_053222 | Vmn1r52       | 0 | 1 | -2.20807   | 0.299755  | 0         | No change |
| NM_053223 | V1ra8         | 0 | 1 | -3.05607   | 0.663742  | 0         | No change |
| NM_053224 | Vmn1r54       | 0 | 1 | -0.886145  | 0.0735158 | 0         | No change |
| NM_053225 | Vmn1r50       | 0 | 1 | -0.886145  | 0.0746977 | 0         | No change |
| NM_053226 | Vmn1r53       | 0 | 1 | -3.20807   | 0.559034  | 0         | No change |
| NM_053227 | Vmn1r44       | 0 | 1 | -0.886145  | 0.0746977 | 0         | No change |
| NM_053228 | Vmn1r40       | 0 | 1 | -1.47111   | 0.149395  | 0         | No change |
| NM_053229 | Vmn1r46       | 0 | 1 | 0.113855   | 0         | 0         | No change |
| NM_053230 | Vmn1r41       | 0 | 1 | -0.886145  | 0.0746977 | 0         | No change |
| NM_053231 | Vmn1r10       | 0 | 1 | 0.113855   | 0         | 0         | No change |
| NM_053232 | Vmn1r29       | 0 | 1 | 1.11385    | 0         | 0.0787182 | No change |
| NM_053233 | Vmn1r11       | 0 | 1 | 0.113855   | 0         | 0         | No change |

|           |               |   |   |             |           |           |           |
|-----------|---------------|---|---|-------------|-----------|-----------|-----------|
| NM_053235 | Vmn1r13       | 0 | 1 | 0.113855    | 0         | 0         | No change |
| NM_053236 | Vmn1r15       | 0 | 1 | 0.113855    | 0         | 0         | No change |
| NM_053237 | Vmn1r14       | 0 | 1 | 0.113855    | 0         | 0         | No change |
| NM_053238 | Vmn1r25       | 0 | 1 | 0.113855    | 0         | 0         | No change |
| NM_053241 | Cldn16        | 0 | 1 | 1.57329     | 0.178395  | 0.612551  | No change |
| NM_053242 | Foxp2         | 0 | 1 | -1.20807    | 0.0927865 | 0.0318599 | No change |
| NM_053243 | Prss1         | 0 | 1 | 0.113855    | 0         | 0         | No change |
| NM_053244 | Kiss1r        | 0 | 1 | 0.435783    | 0.242449  | 0.31786   | No change |
| NM_053245 | Aipl1         | 0 | 1 | -2.20807    | 0.177562  | 0         | No change |
| NM_053247 | Lyve1         | 0 | 1 | 0.52103     | 1.20299   | 1.65227   | No change |
| NM_053248 | Slc5a5        | 0 | 1 | -1.30118    | 0.166616  | 0.0490375 | No change |
| NM_053249 | Krt82         | 0 | 1 | 0.113855    | 0         | 0         | No change |
| NM_053250 | Crip3         | 0 | 1 | -0.663753   | 0.756038  | 0.424799  | No change |
| NM_053251 | Gm4736        | 0 | 1 | 0.113855    | 0         | 0         | No change |
| NM_053255 | Elac1         | 0 | 1 | 0.282831    | 2.35534   | 2.72953   | No change |
| NM_053259 | Prss28        | 0 | 1 | 0.113855    | 0         | 0         | No change |
| NM_053260 | Prss29        | 0 | 1 | 0.113855    | 0         | 0         | No change |
| NM_053262 | Hsd17b11      | 0 | 1 | 0.216338    | 6.64524   | 7.35234   | No change |
| NM_053266 | Gtf2ird2      | 0 | 1 | -0.232205   | 4.22016   | 3.41566   | No change |
| NM_053268 | Rasa2         | 0 | 1 | -0.11132    | 4.219     | 3.71615   | No change |
| NM_054037 | Scgb3a1       | 0 | 1 | 2.92121     | 0         | 0.873724  | No change |
| NM_054038 | Scgb3a2       | 0 | 1 | 0.113855    | 0         | 0         | No change |
| NM_054041 | Antr1         | 0 | 1 | -0.234068   | 2.211     | 1.78659   | No change |
| NM_054044 | Gpr124        | 0 | 1 | 0.420516    | 0.94743   | 1.21018   | No change |
| NM_054045 | Hist2h3c2-ps  | 0 | 1 | -0.0787903  | 3.78766   | 3.40511   | No change |
| NM_054048 | Rcor2         | 0 | 1 | 0.271396    | 0.865106  | 0.998087  | No change |
| NM_054049 | Osr2          | 0 | 1 | -0.00350214 | 2.56763   | 2.43502   | No change |
| NM_054055 | Slc13a3       | 0 | 1 | -1.6935     | 0.129701  | 0.0222677 | No change |
| NM_054058 | Psg20         | 0 | 1 | -0.886145   | 0.0488046 | 0         | No change |
| NM_054059 | Ceacam3       | 0 | 1 | -1.47111    | 0.0657171 | 0         | No change |
| NM_054060 | Psg25         | 0 | 1 | 0.113855    | 0         | 0         | No change |
| NM_054063 | Psg28         | 0 | 1 | 0.113855    | 0         | 0         | No change |
| NM_054064 | Psg29         | 0 | 1 | -1.47111    | 0.0256177 | 0         | No change |
| NM_054068 | Vsx1          | 0 | 1 | 0.113855    | 0.0195437 | 0.0201321 | No change |
| NM_054070 | Afg3l1        | 0 | 1 | 0.220426    | 4.88242   | 5.41628   | No change |
| NM_054074 | Defb6         | 0 | 1 | -0.400718   | 1.94191   | 1.33358   | No change |
| NM_054077 | Prep          | 0 | 1 | 0.245099    | 3.63851   | 4.1069    | No change |
| NM_054079 | Il1fib        | 0 | 1 | 0.113855    | 0         | 0         | No change |
| NM_054080 | Akr1c20       | 0 | 1 | -0.886145   | 0.0533637 | 0         | No change |
| NM_054081 | Mta1          | 0 | 1 | -0.33112    | 5.27406   | 3.98408   | No change |
| NM_054084 | Calcb         | 0 | 1 | 0.113855    | 0         | 0         | No change |
| NM_054085 | Alpk3         | 0 | 1 | -1.20807    | 0.0984827 | 0.0338158 | No change |
| NM_054088 | Pnpla3        | 0 | 1 | 0.698817    | 0.014991  | 0.0308845 | No change |
| NM_054090 | Olf1r73       | 0 | 1 | 0.113855    | 0         | 0         | No change |
| NM_054091 | Olf1r74       | 0 | 1 | 0.113855    | 0         | 0         | No change |
| NM_054094 | Acsm1         | 0 | 1 | 0.113855    | 0         | 0         | No change |
| NM_054098 | Steap4        | 0 | 1 | 0.0933907   | 3.12952   | 3.17801   | No change |
| NM_054100 | 2310034C09Rik | 0 | 1 | 0.113855    | 0         | 0         | No change |
| NM_057173 | Lmo1          | 0 | 1 | 0.52194     | 3.31871   | 4.55816   | No change |
| NM_078484 | Slc35a2       | 0 | 1 | 0.427013    | 4.39222   | 5.63247   | No change |
| NM_079835 | Btnl2         | 0 | 1 | 1.11385     | 0         | 0.0280105 | No change |
| NM_080419 | Igsf8         | 0 | 1 | 0.275493    | 6.02632   | 6.94751   | No change |
| NM_080420 | Lpo           | 0 | 1 | 1.43578     | 0.0238104 | 0.0981086 | No change |
| NM_080433 | Fezf2         | 0 | 1 | 0.113855    | 0.0302487 | 0.0311593 | No change |
| NM_080434 | Apoa5         | 0 | 1 | 0.113855    | 0         | 0         | No change |
| NM_080435 | Adcy4         | 0 | 1 | 1.39396     | 0.123169  | 0.338337  | No change |
| NM_080436 | Rdh1          | 0 | 1 | -0.65168    | 0.286655  | 0.166097  | No change |
| NM_080438 | Glra3         | 0 | 1 | 0.113855    | 0         | 0         | No change |
| NM_080444 | Asb10         | 0 | 1 | -1.76061    | 0.30066   | 0.0619422 | No change |
| NM_080450 | Gjc3          | 0 | 1 | 1.11385     | 0.0198273 | 0.0612725 | No change |
| NM_080453 | Mmp28         | 0 | 1 | -0.0560702  | 0.51267   | 0.465973  | No change |
| NM_080459 | Strc          | 0 | 1 | -1.10854    | 0.0726346 | 0.0249404 | No change |
| NM_080466 | Kcnn3         | 0 | 1 | 0.0680511   | 0.283639  | 0.282753  | No change |
| NM_080469 | Eri3          | 0 | 1 | -0.0139007  | 15.63     | 14.7322   | No change |
| NM_080633 | Aco2          | 0 | 1 | 0.107709    | 23.6674   | 24.2761   | No change |
| NM_080639 | Timp4         | 0 | 1 | -0.829562   | 1.18124   | 0.608398  | No change |
| NM_080640 | Baalc         | 0 | 1 | -0.248715   | 0.24084   | 0.186067  | No change |
| NM_080641 | Bhlhe23       | 0 | 1 | 0.113855    | 0         | 0         | No change |
| NM_080708 | Bmp2k         | 0 | 1 | 0.101407    | 6.16498   | 6.29592   | No change |
| NM_080726 | Rem2          | 0 | 1 | -0.538222   | 0.369332  | 0.22827   | No change |
| NM_080729 | Il25          | 0 | 1 | -0.886145   | 0.0655625 | 0         | No change |
| NM_080795 | Lnx2          | 0 | 1 | 0.069655    | 3.54371   | 3.53977   | No change |
| NM_080843 | Socs4         | 0 | 1 | 0.237087    | 5.0474    | 5.66595   | No change |
| NM_080844 | Serpinc1      | 0 | 1 | -1.02365    | 0.322503  | 0.132885  | No change |
| NM_080845 | Ftcd          | 0 | 1 | -3.05607    | 0.205736  | 0         | No change |
| NM_080846 | Higd1b        | 0 | 1 | -0.803683   | 1.51919   | 0.782463  | No change |

|           |           |   |   |            |           |           |           |
|-----------|-----------|---|---|------------|-----------|-----------|-----------|
| NM_080848 | Wdr5      | 0 | 1 | -0.224386  | 9.06008   | 7.37714   | No change |
| NM_080849 | Nek8      | 0 | 1 | -0.108538  | 5.55054   | 4.89717   | No change |
| NM_080852 | Slc7a12   | 0 | 1 | 0.113855   | 0         | 0         | No change |
| NM_080855 | Zcchc14   | 0 | 1 | -0.133111  | 4.02489   | 3.49199   | No change |
| NM_130448 | Pcdh18    | 0 | 1 | -0.175652  | 0.283195  | 0.236155  | No change |
| NM_130452 | Bbox1     | 0 | 1 | -0.414077  | 2.61134   | 1.8521    | No change |
| NM_130453 | Gpha2     | 0 | 1 | -1.20807   | 0.474102  | 0.122093  | No change |
| NM_130455 | Grin3b    | 0 | 1 | -0.319105  | 0.553456  | 0.416624  | No change |
| NM_130457 | Cntnap4   | 0 | 1 | -0.471108  | 0.114957  | 0.0740113 | No change |
| NM_130458 | Sp7       | 0 | 1 | 0.113855   | 0         | 0         | No change |
| NM_130856 | Krtap16-8 | 0 | 1 | 0.113855   | 0         | 0         | No change |
| NM_130857 | Krtap16-5 | 0 | 1 | 0.113855   | 0         | 0         | No change |
| NM_130858 | Nxph3     | 0 | 1 | -0.722646  | 0.799155  | 0.445907  | No change |
| NM_130859 | Card10    | 0 | 1 | 0.452271   | 1.26768   | 1.65508   | No change |
| NM_130860 | Cdk9      | 0 | 1 | -0.0931668 | 7.97901   | 7.11766   | No change |
| NM_130868 | Olfr138   | 0 | 1 | 0.113855   | 0         | 0         | No change |
| NM_130869 | Nobox     | 0 | 1 | 0.113855   | 0         | 0         | No change |
| NM_130870 | Krtap16-1 | 0 | 1 | 0.113855   | 0         | 0         | No change |
| NM_130873 | Krtap16-4 | 0 | 1 | 0.113855   | 0         | 0         | No change |
| NM_130876 | Krtap16-9 | 0 | 1 | 0.113855   | 0         | 0         | No change |
| NM_130884 | ldh3b     | 0 | 1 | 0.074422   | 47.5929   | 47.7032   | No change |
| NM_130886 | Card14    | 0 | 1 | 0.239386   | 1.14453   | 1.28781   | No change |
| NM_130888 | Nxf7      | 0 | 1 | 1.28378    | 0.112227  | 0.308281  | No change |
| NM_130889 | Anp32b    | 0 | 1 | -0.044293  | 9.2788    | 8.5603    | No change |
| NM_130904 | Cd209d    | 0 | 1 | -0.471108  | 0.161513  | 0.0831877 | No change |
| NM_130905 | Cd209e    | 0 | 1 | -1.47111   | 0.0787046 | 0         | No change |
| NM_133167 | Parvb     | 0 | 1 | -0.301183  | 0.282158  | 0.213145  | No change |
| NM_133183 | Cacng6    | 0 | 1 | 0.113855   | 0         | 0         | No change |
| NM_133184 | Slc5a4a   | 0 | 1 | 0.113855   | 0         | 0         | No change |
| NM_133187 | Fam198b   | 0 | 1 | 0.238113   | 1.9771    | 2.22079   | No change |
| NM_133189 | Cacng7    | 0 | 1 | 1.11385    | 0         | 0.0867041 | No change |
| NM_133191 | Eps8l2    | 0 | 1 | -0.208073  | 1.00049   | 0.819799  | No change |
| NM_133192 | Npffr2    | 0 | 1 | -2.20807   | 0.169672  | 0         | No change |
| NM_133193 | Il1rl2    | 0 | 1 | 0.698817   | 1.03646   | 1.6199    | No change |
| NM_133197 | Mcf2      | 0 | 1 | 0.113855   | 4.58963   | 4.7278    | No change |
| NM_133199 | Scn4a     | 0 | 1 | -1.07879   | 0.158441  | 0.0652843 | No change |
| NM_133202 | Trhr2     | 0 | 1 | -0.471108  | 0.104019  | 0.0535754 | No change |
| NM_133203 | Klra17    | 0 | 1 | 0.113855   | 0.118425  | 0.12199   | No change |
| NM_133205 | Arr3      | 0 | 1 | 1.11385    | 0.0512825 | 0.158479  | No change |
| NM_133207 | Kcnh7     | 0 | 1 | -1.88615   | 0.0550497 | 0         | No change |
| NM_133208 | Zfp287    | 0 | 1 | -0.414524  | 2.06816   | 1.47271   | No change |
| NM_133209 | Pilrb1    | 0 | 1 | -0.471108  | 0.546611  | 0.351917  | No change |
| NM_133210 | Sertad3   | 0 | 1 | 0.140822   | 2.88308   | 3.02699   | No change |
| NM_133212 | Tlr8      | 0 | 1 | -0.581291  | 0.728267  | 0.454661  | No change |
| NM_133213 | Xpnpep2   | 0 | 1 | 0.528892   | 0.0398473 | 0.0615703 | No change |
| NM_133215 | Mtmr4     | 0 | 1 | -0.0413419 | 14.754    | 13.6468   | No change |
| NM_133217 | Bco2      | 0 | 1 | -0.945039  | 0.806087  | 0.380579  | No change |
| NM_133224 | Atp13a1   | 0 | 1 | 0.107623   | 4.1132    | 4.21868   | No change |
| NM_133228 | Zfp87     | 0 | 1 | 0.14687    | 5.53119   | 5.8302    | No change |
| NM_133229 | Ripply3   | 0 | 1 | 0.265858   | 0.364646  | 0.422576  | No change |
| NM_133231 | Rfxap     | 0 | 1 | -0.390376  | 4.44849   | 3.22096   | No change |
| NM_133234 | Bbc3      | 0 | 1 | -0.400718  | 0.317427  | 0.217989  | No change |
| NM_133235 | Khdrbs2   | 0 | 1 | -0.886145  | 0.0512825 | 0         | No change |
| NM_133237 | Apcdd1    | 0 | 1 | -0.630888  | 1.51885   | 0.923357  | No change |
| NM_133238 | Cd209a    | 0 | 1 | 1.22933    | 0.234814  | 0.58052   | No change |
| NM_133246 | Ms4a3     | 0 | 1 | 0.113855   | 0         | 0         | No change |
| NM_133249 | Ppargc1b  | 0 | 1 | -0.0725583 | 0.610004  | 0.549821  | No change |
| NM_133251 | Vgll1     | 0 | 1 | -0.886145  | 0.0587135 | 0         | No change |
| NM_133254 | Slc5a2    | 0 | 1 | 0.522967   | 1.85107   | 2.5424    | No change |
| NM_133256 | Gsx2      | 0 | 1 | 0.113855   | 0         | 0         | No change |
| NM_133346 | Asb6      | 0 | 1 | 0.21339    | 6.89343   | 7.61059   | No change |
| NM_133353 | Oosp1     | 0 | 1 | 0.113855   | 0         | 0         | No change |
| NM_133357 | Krt75     | 0 | 1 | 0.113855   | 0         | 0         | No change |
| NM_133359 | AY026312  | 0 | 1 | 0.113855   | 0         | 0         | No change |
| NM_133363 | Myoz3     | 0 | 1 | 0.113855   | 0.0410321 | 0.0422673 | No change |
| NM_133364 | Prima1    | 0 | 1 | -0.886145  | 0.231026  | 0.079327  | No change |
| NM_133365 | Dnahc5    | 0 | 1 | -0.266749  | 0.611459  | 0.482744  | No change |
| NM_133485 | Ppp1r14c  | 0 | 1 | -2.05607   | 0.220897  | 0.0284433 | No change |
| NM_133500 | Ntng2     | 0 | 1 | -1.14918   | 0.481244  | 0.180266  | No change |
| NM_133653 | Mat1a     | 0 | 1 | -0.175652  | 0.217247  | 0.17903   | No change |
| NM_133659 | Erg       | 0 | 1 | -0.0381483 | 0.91287   | 0.843074  | No change |
| NM_133660 | Ces1e     | 0 | 1 | -0.734142  | 0.571529  | 0.311683  | No change |
| NM_133661 | Slc6a12   | 0 | 1 | 0.579518   | 0.543839  | 0.784295  | No change |
| NM_133665 | Mef2d     | 0 | 1 | -0.0560702 | 2.77751   | 2.53998   | No change |
| NM_133666 | Ndufv1    | 0 | 1 | -0.047462  | 57.3681   | 52.8385   | No change |
| NM_133669 | Rp2h      | 0 | 1 | -0.171547  | 7.87865   | 6.65574   | No change |



|           |               |   |   |             |           |           |           |
|-----------|---------------|---|---|-------------|-----------|-----------|-----------|
| NM_133670 | Sult1a1       | 0 | 1 | 0.259154    | 7.63061   | 8.69876   | No change |
| NM_133676 | Osgep         | 0 | 1 | 0.107066    | 9.18837   | 9.42033   | No change |
| NM_133678 | Sac3d1        | 0 | 1 | -0.114414   | 4.10854   | 3.60522   | No change |
| NM_133686 | Qprt          | 0 | 1 | 1.11385     | 0.058223  | 0.179927  | No change |
| NM_133687 | Cxxc5         | 0 | 1 | 0.00105421  | 21.9938   | 20.9496   | No change |
| NM_133690 | Atp1b4        | 0 | 1 | 1.11385     | 0.0171573 | 0.0530214 | No change |
| NM_133693 | Rbm42         | 0 | 1 | 0.0441137   | 18.1915   | 17.8528   | No change |
| NM_133694 | Fbxl15        | 0 | 1 | -0.127153   | 3.30886   | 2.8759    | No change |
| NM_133698 | Hrnr          | 0 | 1 | -0.253088   | 1.53667   | 1.22593   | No change |
| NM_133709 | Chrdl2        | 0 | 1 | 0.00693961  | 0.596058  | 0.566771  | No change |
| NM_133710 | Ctdspl        | 0 | 1 | -0.0250685  | 4.57892   | 4.28232   | No change |
| NM_133712 | Klk10         | 0 | 1 | 0.113855    | 0         | 0         | No change |
| NM_133719 | Metrn         | 0 | 1 | -0.0436865  | 1.4317    | 1.31678   | No change |
| NM_133724 | Cno           | 0 | 1 | 0.0965768   | 4.42918   | 4.50755   | No change |
| NM_133727 | Kptn          | 0 | 1 | -0.41666    | 2.15545   | 1.52376   | No change |
| NM_133730 | Krt25         | 0 | 1 | 0.113855    | 0         | 0         | No change |
| NM_133731 | Prss22        | 0 | 1 | 0.698817    | 0.0526382 | 0.108446  | No change |
| NM_133733 | 9030425E11Rik | 0 | 1 | -0.268016   | 0.999352  | 0.784333  | No change |
| NM_133740 | Prmt3         | 0 | 1 | 0.136223    | 1.75978   | 1.84153   | No change |
| NM_133746 | Calhm2        | 0 | 1 | 0.232499    | 1.15645   | 1.29637   | No change |
| NM_133756 | Gpn1          | 0 | 1 | -0.402269   | 4.98076   | 3.57594   | No change |
| NM_133766 | Efr3a         | 0 | 1 | -0.121821   | 13.1226   | 11.4783   | No change |
| NM_133767 | Mtif2         | 0 | 1 | 0.15912     | 6.34033   | 6.7402    | No change |
| NM_133769 | Cyfp2         | 0 | 1 | 0.186005    | 1.27293   | 1.37907   | No change |
| NM_133770 | Adck4         | 0 | 1 | 0.418709    | 3.21415   | 4.09766   | No change |
| NM_133776 | Gpr110        | 0 | 1 | -0.208073   | 0.0795581 | 0.0614649 | No change |
| NM_133779 | Pigt          | 0 | 1 | 0.295795    | 5.04231   | 5.89601   | No change |
| NM_133787 | Nmd3          | 0 | 1 | -0.276092   | 6.05503   | 4.75027   | No change |
| NM_133800 | Nol12         | 0 | 1 | 0.165849    | 3.77664   | 4.03441   | No change |
| NM_133807 | Lrrc59        | 0 | 1 | -0.0341815  | 31.3368   | 29.1296   | No change |
| NM_133809 | Kmo           | 0 | 1 | -0.426714   | 0.418492  | 0.287394  | No change |
| NM_133816 | Sh3bp4        | 0 | 1 | 0.291853    | 3.73796   | 4.35867   | No change |
| NM_133818 | Al597479      | 0 | 1 | -0.193859   | 10.1606   | 8.4521    | No change |
| NM_133832 | Rdh10         | 0 | 1 | -0.433633   | 3.4315    | 2.40867   | No change |
| NM_133849 | Hrh3          | 0 | 1 | 0.156924    | 0.917012  | 0.974137  | No change |
| NM_133858 | Fam63a        | 0 | 1 | 0.156924    | 10.6265   | 11.2789   | No change |
| NM_133880 | Pafah2        | 0 | 1 | 0.152437    | 15.5962   | 16.5018   | No change |
| NM_133884 | Gpn2          | 0 | 1 | -0.157447   | 5.34518   | 4.55311   | No change |
| NM_133889 | Bsdcl1        | 0 | 1 | 0.0358523   | 15.4116   | 15.0386   | No change |
| NM_133892 | Lao1          | 0 | 1 | -1.47111    | 0.0711879 | 0         | No change |
| NM_133893 | Oas1d         | 0 | 1 | 0.113855    | 0         | 0         | No change |
| NM_133894 | Ugt2b38       | 0 | 1 | 0.113855    | 0         | 0         | No change |
| NM_133902 | Sdsl          | 0 | 1 | 0.224886    | 1.38348   | 1.54389   | No change |
| NM_133903 | Spon2         | 0 | 1 | 0.568421    | 0.810021  | 1.15533   | No change |
| NM_133904 | Acacb         | 0 | 1 | -0.227182   | 0.459965  | 0.372281  | No change |
| NM_133911 | Gpr125        | 0 | 1 | -0.0870971  | 6.57216   | 5.88766   | No change |
| NM_133921 | Nfxl1         | 0 | 1 | -0.0259126  | 10.8812   | 10.172    | No change |
| NM_133924 | Snx21         | 0 | 1 | -0.0589818  | 5.63963   | 5.14817   | No change |
| NM_133927 | Itfg2         | 0 | 1 | 0.29921     | 3.72868   | 4.37179   | No change |
| NM_133928 | Chchd4        | 0 | 1 | 0.249738    | 9.0125    | 10.2064   | No change |
| NM_133939 | Naa38         | 0 | 1 | 0.312184    | 17.5626   | 20.7715   | No change |
| NM_133941 | Dhx32         | 0 | 1 | 0.0088492   | 17.7409   | 16.9904   | No change |
| NM_133952 | Unc45a        | 0 | 1 | 0.138205    | 4.99943   | 5.23797   | No change |
| NM_133954 | AA960436      | 0 | 1 | -0.400718   | 5.49168   | 3.94769   | No change |
| NM_133962 | Arhgef18      | 0 | 1 | 0.165637    | 3.94488   | 4.21264   | No change |
| NM_133967 | Zdhhc7        | 0 | 1 | -0.0348806  | 5.95833   | 5.53399   | No change |
| NM_133972 | Armc6         | 0 | 1 | 0.187855    | 1.77562   | 1.92706   | No change |
| NM_133973 | Cog4          | 0 | 1 | -0.00984717 | 16.2971   | 15.4061   | No change |
| NM_133980 | Slc22a13      | 0 | 1 | -1.05607    | 0.278215  | 0.107472  | No change |
| NM_133981 | Alg9          | 0 | 1 | 0.120033    | 6.31099   | 6.529     | No change |
| NM_133982 | Rpp25         | 0 | 1 | -0.471108   | 0.258889  | 0.16001   | No change |
| NM_133984 | Hemk1         | 0 | 1 | -0.21067    | 4.3836    | 3.59937   | No change |
| NM_133986 | Tcta          | 0 | 1 | 0.102058    | 26.2258   | 26.7949   | No change |
| NM_133993 | Pwp1          | 0 | 1 | 0.276584    | 5.40465   | 6.23543   | No change |
| NM_133995 | Upb1          | 0 | 1 | 1.92121     | 0.1457    | 0.650371  | No change |
| NM_133996 | Apon          | 0 | 1 | -1.47111    | 0.086147  | 0         | No change |
| NM_133997 | Apof          | 0 | 1 | -0.208073   | 0.144441  | 0.111592  | No change |
| NM_133998 | 1810008A18Rik | 0 | 1 | 0.0485141   | 7.75004   | 7.62853   | No change |
| NM_134009 | Ncln          | 0 | 1 | -0.0906601  | 9.68294   | 8.65282   | No change |
| NM_134023 | Tbc1d10a      | 0 | 1 | 0.130065    | 6.4119    | 6.67998   | No change |
| NM_134024 | Tubg1         | 0 | 1 | -0.26585    | 5.19773   | 4.10489   | No change |
| NM_134028 | Tubg2         | 0 | 1 | 0.274319    | 0.627511  | 0.727202  | No change |
| NM_134058 | Pelo          | 0 | 1 | 0.178464    | 5.76341   | 6.21092   | No change |
| NM_134059 | Ddx41         | 0 | 1 | -0.118668   | 16.5303   | 14.4884   | No change |
| NM_134066 | Akr1c18       | 0 | 1 | 1.11385     | 0         | 0.0612551 | No change |
| NM_134072 | Akr1c14       | 0 | 1 | 0.0358523   | 0.513077  | 0.49916   | No change |

|           |             |   |   |            |           |           |           |
|-----------|-------------|---|---|------------|-----------|-----------|-----------|
| NM_134078 | Chmp7       | 0 | 1 | 0.129452   | 11.8215   | 12.3101   | No change |
| NM_134079 | Adk         | 0 | 1 | 0.113855   | 8.15817   | 8.40377   | No change |
| NM_134084 | Ppif        | 0 | 1 | 0.33807    | 5.04564   | 6.07926   | No change |
| NM_134093 | Letmd1      | 0 | 1 | -0.0519959 | 5.94511   | 5.456     | No change |
| NM_134096 | Fam19a5     | 0 | 1 | 0.988324   | 0.294515  | 0.579182  | No change |
| NM_134110 | Kcne2       | 0 | 1 | 0.654423   | 0.41141   | 0.635693  | No change |
| NM_134114 | Sft2d1      | 0 | 1 | 0.38279    | 8.04661   | 10.0014   | No change |
| NM_134115 | Stk38       | 0 | 1 | 0.0968388  | 12.6329   | 12.8604   | No change |
| NM_134125 | Trip10      | 0 | 1 | 0.245099   | 2.8693    | 3.24056   | No change |
| NM_134130 | Abhd3       | 0 | 1 | 0.320306   | 7.16504   | 8.52209   | No change |
| NM_134134 | Hmgxb3      | 0 | 1 | -0.0126422 | 9.25961   | 8.73647   | No change |
| NM_134138 | Psmg2       | 0 | 1 | -0.443202  | 8.35789   | 5.83005   | No change |
| NM_134139 | Wdr74       | 0 | 1 | -0.0223496 | 6.3673    | 5.96271   | No change |
| NM_134147 | Macrocl1    | 0 | 1 | 0.487313   | 2.35043   | 3.15317   | No change |
| NM_134148 | Carns1      | 0 | 1 | 0.279865   | 0.70255   | 0.814162  | No change |
| NM_134154 | Slc25a45    | 0 | 1 | 0.0828279  | 5.32297   | 5.36572   | No change |
| NM_134156 | Actn1       | 0 | 1 | 0.277974   | 4.62259   | 5.33776   | No change |
| NM_134157 | Atp6v1b1    | 0 | 1 | -0.350092  | 1.4105    | 1.04315   | No change |
| NM_134159 | Ii17rc      | 0 | 1 | 0.682139   | 0.858892  | 1.32712   | No change |
| NM_134165 | Vmn1r37     | 0 | 1 | 0.113855   | 0         | 0         | No change |
| NM_134166 | Vmn1r36     | 0 | 1 | 0.113855   | 0         | 0         | No change |
| NM_134167 | Vmn1r35     | 0 | 1 | -0.886145  | 0.0782188 | 0         | No change |
| NM_134168 | Vmn1r38     | 0 | 1 | 0.113855   | 0         | 0         | No change |
| NM_134169 | Vmn1r33     | 0 | 1 | 0.113855   | 0         | 0         | No change |
| NM_134170 | Vmn1r32     | 0 | 1 | -2.20807   | 0.114157  | 0         | No change |
| NM_134171 | Vmn1r17     | 0 | 1 | 0.113855   | 0         | 0         | No change |
| NM_134172 | Vmn1r26     | 0 | 1 | 0.113855   | 0         | 0         | No change |
| NM_134173 | Vmn1r24     | 0 | 1 | 0.113855   | 0         | 0         | No change |
| NM_134174 | Vmn1r5      | 0 | 1 | -1.88615   | 0.220547  | 0         | No change |
| NM_134175 | Vmn1r6      | 0 | 1 | -0.471108  | 0.152835  | 0.0787182 | No change |
| NM_134176 | Vmn1r4      | 0 | 1 | -0.886145  | 0.233869  | 0.0803031 | No change |
| NM_134177 | Vmn1r30     | 0 | 1 | -0.886145  | 0.0766699 | 0         | No change |
| NM_134178 | Vmn1r22     | 0 | 1 | 0.113855   | 0         | 0         | No change |
| NM_134179 | Vmn1r23     | 0 | 1 | 0.113855   | 0         | 0         | No change |
| NM_134180 | Vmn1r28     | 0 | 1 | 0.113855   | 0         | 0         | No change |
| NM_134181 | Vmn1r18     | 0 | 1 | 0.113855   | 0         | 0         | No change |
| NM_134182 | Vmn1r19     | 0 | 1 | 0.113855   | 0         | 0         | No change |
| NM_134183 | Vmn1r21     | 0 | 1 | -1.47111   | 0.155913  | 0         | No change |
| NM_134184 | Vmn1r16     | 0 | 1 | 0.113855   | 0         | 0         | No change |
| NM_134185 | Vmn1r9      | 0 | 1 | 0.113855   | 0         | 0         | No change |
| NM_134187 | Vmn1r8      | 0 | 1 | -1.47111   | 0.11491   | 0         | No change |
| NM_134190 | Vmn1r229    | 0 | 1 | 0.113855   | 0         | 0         | No change |
| NM_134191 | Vmn1r226    | 0 | 1 | -0.886145  | 0.0776956 | 0         | No change |
| NM_134192 | Vmn1r228    | 0 | 1 | 0.113855   | 0         | 0         | No change |
| NM_134193 | Vmn1r232    | 0 | 1 | 0.113855   | 0         | 0         | No change |
| NM_134194 | Vmn1r225    | 0 | 1 | 0.113855   | 0         | 0         | No change |
| NM_134195 | Vmn1r227    | 0 | 1 | 0.113855   | 0         | 0         | No change |
| NM_134196 | Vmn1r231    | 0 | 1 | 0.113855   | 0         | 0         | No change |
| NM_134197 | Vmn1r230    | 0 | 1 | 0.113855   | 0         | 0         | No change |
| NM_134198 | Vmn1r234    | 0 | 1 | -0.886145  | 0.0703969 | 0         | No change |
| NM_134199 | Vmn1r235    | 0 | 1 | 1.11385    | 0         | 0.0403094 | No change |
| NM_134200 | Vmn1r237    | 0 | 1 | 0.113855   | 0         | 0         | No change |
| NM_134201 | Vmn1r236    | 0 | 1 | 0.113855   | 0         | 0         | No change |
| NM_134202 | Vmn1r233    | 0 | 1 | 0.113855   | 0         | 0         | No change |
| NM_134203 | Vmn1r73     | 0 | 1 | 0.113855   | 0         | 0         | No change |
| NM_134204 | Vmn1r80     | 0 | 1 | 0.113855   | 0         | 0         | No change |
| NM_134205 | Vmn1r76     | 0 | 1 | 0.113855   | 0         | 0         | No change |
| NM_134206 | Vmn1r74     | 0 | 1 | 0.113855   | 0         | 0         | No change |
| NM_134207 | Vmn1r75     | 0 | 1 | 0.113855   | 0         | 0         | No change |
| NM_134208 | Vmn1r78     | 0 | 1 | 0.113855   | 0         | 0         | No change |
| NM_134209 | Vmn1r83     | 0 | 1 | 0.113855   | 0         | 0         | No change |
| NM_134210 | Vmn1r81     | 0 | 1 | 0.113855   | 0         | 0         | No change |
| NM_134211 | Vmn1r-ps103 | 0 | 1 | 0.113855   | 0         | 0         | No change |
| NM_134212 | Vmn1r200    | 0 | 1 | 0.113855   | 0         | 0         | No change |
| NM_134213 | Vmn1r199    | 0 | 1 | 0.113855   | 0         | 0         | No change |
| NM_134214 | Vmn1r214    | 0 | 1 | 1.11385    | 0         | 0.0650281 | No change |
| NM_134215 | Vmn1r213    | 0 | 1 | 0.113855   | 0         | 0         | No change |
| NM_134216 | Vmn1r206    | 0 | 1 | 0.113855   | 0         | 0         | No change |
| NM_134217 | Vmn1r205    | 0 | 1 | 0.113855   | 0         | 0         | No change |
| NM_134218 | Vmn1r208    | 0 | 1 | -0.886145  | 0.0751812 | 0         | No change |
| NM_134219 | Vmn1r215    | 0 | 1 | 0.113855   | 0         | 0         | No change |
| NM_134220 | Vmn1r198    | 0 | 1 | 0.113855   | 0         | 0         | No change |
| NM_134221 | Vmn1r201    | 0 | 1 | 0.113855   | 0         | 0         | No change |
| NM_134222 | Vmn1r218    | 0 | 1 | 0.113855   | 0         | 0         | No change |
| NM_134223 | Vmn1r195    | 0 | 1 | 0.113855   | 0         | 0         | No change |
| NM_134224 | Vmn1r202    | 0 | 1 | 0.113855   | 0         | 0         | No change |

|           |               |   |   |             |           |           |           |
|-----------|---------------|---|---|-------------|-----------|-----------|-----------|
| NM_134225 | Vmn1r193      | 0 | 1 | 0.113855    | 0         | 0         | No change |
| NM_134226 | Vmn1r89       | 0 | 1 | 0.113855    | 0         | 0         | No change |
| NM_134227 | Vmn1r87       | 0 | 1 | 0.113855    | 0         | 0         | No change |
| NM_134228 | Vmn1r70       | 0 | 1 | 0.113855    | 0         | 0         | No change |
| NM_134229 | Vmn1r67       | 0 | 1 | 0.113855    | 0         | 0         | No change |
| NM_134230 | Vmn1r66       | 0 | 1 | 0.113855    | 0         | 0         | No change |
| NM_134231 | Vmn1r185      | 0 | 1 | 0.113855    | 0         | 0         | No change |
| NM_134233 | Vmn1r84       | 0 | 1 | 0.113855    | 0         | 0         | No change |
| NM_134234 | Vmn1r82       | 0 | 1 | 0.113855    | 0         | 0         | No change |
| NM_134235 | Vmn1r210      | 0 | 1 | 0.113855    | 0         | 0         | No change |
| NM_134236 | Vmn1r203      | 0 | 1 | 1.11385     | 0         | 0.0766998 | No change |
| NM_134237 | Vmn1r220      | 0 | 1 | 0.113855    | 0         | 0         | No change |
| NM_134238 | Vmn1r219      | 0 | 1 | 0.113855    | 0         | 0         | No change |
| NM_134239 | Vmn1r217      | 0 | 1 | 0.113855    | 0         | 0         | No change |
| NM_134240 | Vmn1r222      | 0 | 1 | -2.47111    | 0.375906  | 0         | No change |
| NM_134241 | Vmn1r212      | 0 | 1 | 0.113855    | 0         | 0         | No change |
| NM_134243 | Vmn1r211      | 0 | 1 | 0.113855    | 0         | 0         | No change |
| NM_134244 | Vmn1r197      | 0 | 1 | 0.113855    | 0         | 0         | No change |
| NM_134245 | Vmn1r216      | 0 | 1 | 0.113855    | 0         | 0         | No change |
| NM_134246 | Acot3         | 0 | 1 | 1.69882     | 0         | 0.0553729 | No change |
| NM_134247 | Acot4         | 0 | 1 | 0.92121     | 0.209828  | 0.401412  | No change |
| NM_134250 | Havcr2        | 0 | 1 | 0.354863    | 0.53728   | 0.658875  | No change |
| NM_134255 | Elov15        | 0 | 1 | -0.186805   | 17.6926   | 14.7919   | No change |
| NM_134256 | AB056442      | 0 | 1 | 0.113855    | 0.0324003 | 0.0333756 | No change |
| NM_134420 | Slc26a6       | 0 | 1 | 0.113855    | 0.510002  | 0.525356  | No change |
| NM_134436 | Vmn1r27       | 0 | 1 | 0.113855    | 0         | 0         | No change |
| NM_134437 | Il17rd        | 0 | 1 | -0.065314   | 1.15307   | 1.04804   | No change |
| NM_134438 | Gpr3711       | 0 | 1 | 0.698817    | 0.0928002 | 0.159323  | No change |
| NM_138301 | Trpm2         | 0 | 1 | -0.0270077  | 0.401413  | 0.374116  | No change |
| NM_138311 | H1foo         | 0 | 1 | 0.113855    | 0         | 0         | No change |
| NM_138582 | D17H6S56E-3   | 0 | 1 | -0.234068   | 0.436288  | 0.34955   | No change |
| NM_138583 | D16H22S680E   | 0 | 1 | 0.429357    | 4.09688   | 5.26341   | No change |
| NM_138590 | Zcchc7        | 0 | 1 | 0.0883891   | 20.4963   | 20.7434   | No change |
| NM_138591 | Gfm1          | 0 | 1 | -0.298586   | 4.93591   | 3.81338   | No change |
| NM_138592 | Usp39         | 0 | 1 | -0.0231901  | 19.5651   | 18.3248   | No change |
| NM_138595 | Gldc          | 0 | 1 | -0.218309   | 7.19938   | 5.88701   | No change |
| NM_138597 | Atp5o         | 0 | 1 | -0.00778258 | 75.8317   | 71.791    | No change |
| NM_138599 | Tomm70a       | 0 | 1 | -0.0546282  | 20.7345   | 19.0024   | No change |
| NM_138607 | Fam50a        | 0 | 1 | 0.461778    | 3.82984   | 5.03523   | No change |
| NM_138631 | Tssc4         | 0 | 1 | 0.351798    | 11.2132   | 13.6363   | No change |
| NM_138647 | Lass1         | 0 | 1 | -0.234068   | 0.332602  | 0.26355   | No change |
| NM_138648 | Olr1          | 0 | 1 | -0.471108   | 0.0390655 | 0.0201208 | No change |
| NM_138652 | Atp12a        | 0 | 1 | -0.674641   | 0.317508  | 0.181703  | No change |
| NM_138654 | 5033411D12Rik | 0 | 1 | 0.0900081   | 2.42692   | 2.45831   | No change |
| NM_138655 | Tmc2          | 0 | 1 | -1.62311    | 0.195036  | 0.0446461 | No change |
| NM_138659 | Prpf8         | 0 | 1 | -0.0518342  | 19.3959   | 17.811    | No change |
| NM_138660 | Casc3         | 0 | 1 | -0.0230551  | 4.50713   | 4.22074   | No change |
| NM_138669 | Eif4a3        | 0 | 1 | 0.174502    | 26.5814   | 28.5594   | No change |
| NM_138672 | Stab1         | 0 | 1 | 0.153383    | 3.44324   | 3.64567   | No change |
| NM_138675 | Med9          | 0 | 1 | 0.0329348   | 11.4266   | 11.1272   | No change |
| NM_138682 | Lrrc4         | 0 | 1 | 0.113855    | 2.21278   | 2.27939   | No change |
| NM_138683 | Rspo1         | 0 | 1 | 0.329584    | 1.14002   | 1.37006   | No change |
| NM_138684 | Wfdc12        | 0 | 1 | 0.113855    | 0         | 0         | No change |
| NM_138743 | Fam165b       | 0 | 1 | 0.515953    | 7.66622   | 10.4815   | No change |
| NM_138748 | Ppp2r4        | 0 | 1 | -0.103046   | 23.6096   | 20.9216   | No change |
| NM_138942 | Dbh           | 0 | 1 | 0.698817    | 0.0305403 | 0.0629193 | No change |
| NM_138944 | Pou4f2        | 0 | 1 | 0.113855    | 0         | 0         | No change |
| NM_138945 | Pou4f3        | 0 | 1 | 0.113855    | 0         | 0         | No change |
| NM_138948 | Cabp7         | 0 | 1 | 0.113855    | 0         | 0         | No change |
| NM_138955 | Abcg4         | 0 | 1 | -1.34558    | 0.192203  | 0.0593968 | No change |
| NM_139001 | Cspg4         | 0 | 1 | 0.301927    | 0.675286  | 0.793714  | No change |
| NM_139063 | Muted         | 0 | 1 | -0.0353387  | 11.1887   | 10.3892   | No change |
| NM_139128 | Coro6         | 0 | 1 | -1.47111    | 0.393745  | 0.1014    | No change |
| NM_139134 | Chodl         | 0 | 1 | 0.85082     | 0.0550932 | 0.113504  | No change |
| NM_139138 | Emr4          | 0 | 1 | -0.623111   | 0.0798544 | 0.0411292 | No change |
| NM_139142 | Slc6a20a      | 0 | 1 | -0.538222   | 0.772731  | 0.492757  | No change |
| NM_139148 | Clca4         | 0 | 1 | 0.113855    | 0         | 0         | No change |
| NM_139149 | Fus           | 0 | 1 | 0.159841    | 9.29743   | 9.88878   | No change |
| NM_139153 | Agap3         | 0 | 1 | 0.0207454   | 3.45531   | 3.33547   | No change |
| NM_139154 | Rab40c        | 0 | 1 | 0.108208    | 7.20669   | 7.39453   | No change |
| NM_139197 | Gbg1          | 0 | 1 | -0.65168    | 0.835271  | 0.483984  | No change |
| NM_139218 | Dppa3         | 0 | 1 | 0.113855    | 0         | 0         | No change |
| NM_139219 | Defb9         | 0 | 1 | 2.11385     | 0         | 0.666789  | No change |
| NM_139220 | Defb7         | 0 | 1 | 0.113855    | 0         | 0         | No change |
| NM_139221 | Defb11        | 0 | 1 | 0.622002    | 9.04569   | 13.3417   | No change |
| NM_139223 | Defb13        | 0 | 1 | 1.05245     | 3.42242   | 7.0509    | No change |

|           |               |   |   |             |           |           |           |
|-----------|---------------|---|---|-------------|-----------|-----------|-----------|
| NM_139224 | Defb35        | 0 | 1 | 1.06495     | 3.65431   | 7.52864   | No change |
| NM_139227 | Atxn7         | 0 | 1 | -0.114263   | 5.55347   | 4.88246   | No change |
| NM_139236 | Nol6          | 0 | 1 | 0.201762    | 5.92304   | 6.48569   | No change |
| NM_139269 | Pla2g16       | 0 | 1 | -0.0787903  | 1.24628   | 1.12078   | No change |
| NM_139270 | Pth2r         | 0 | 1 | -3.05607    | 0.230963  | 0         | No change |
| NM_139291 | Cdc26         | 0 | 1 | 0.260696    | 22.0314   | 25.1359   | No change |
| NM_139293 | Ece2          | 0 | 1 | -0.886145   | 0.0668197 | 0.0229437 | No change |
| NM_139296 | Moxd2         | 0 | 1 | -2.20807    | 0.149877  | 0         | No change |
| NM_139304 | Gatad2b       | 0 | 1 | -0.236902   | 5.04597   | 4.0679    | No change |
| NM_139305 | Car9          | 0 | 1 | 0.265858    | 0.284606  | 0.329821  | No change |
| NM_139306 | Acer2         | 0 | 1 | 0.0388928   | 1.29307   | 1.26369   | No change |
| NM_139307 | Vasn          | 0 | 1 | 0.123944    | 6.20658   | 6.43845   | No change |
| NM_139310 | Otoa          | 0 | 1 | -0.471108   | 0.0381984 | 0.0196741 | No change |
| NM_144491 | Dph1          | 0 | 1 | 0.254146    | 7.75471   | 8.80745   | No change |
| NM_144509 | Arl6ip4       | 0 | 1 | 0.127152    | 12.6768   | 13.1799   | No change |
| NM_144512 | Slc6a13       | 0 | 1 | 0.747727    | 0.907629  | 1.46921   | No change |
| NM_144517 | Tbc1d19       | 0 | 1 | 0.176865    | 2.87795   | 3.09812   | No change |
| NM_144526 | Fam64a        | 0 | 1 | 0.113855    | 0.142619  | 0.146912  | No change |
| NM_144531 | 9030409G11Rik | 0 | 1 | 0.3065      | 2.04387   | 2.40845   | No change |
| NM_144532 | Cabp4         | 0 | 1 | 1.11385     | 0.145903  | 0.350689  | No change |
| NM_144533 | Nmnat3        | 0 | 1 | 0.092716    | 8.84068   | 8.97387   | No change |
| NM_144544 | 2210407C18Rik | 0 | 1 | -0.886145   | 0.23786   | 0.0816735 | No change |
| NM_144545 | Eif3j         | 0 | 1 | -0.0495336  | 15.3695   | 14.1338   | No change |
| NM_144548 | Il23r         | 0 | 1 | 0.113855    | 0.0560233 | 0.0577098 | No change |
| NM_144559 | Fcgr4         | 0 | 1 | -0.824745   | 1.2266    | 0.631761  | No change |
| NM_144761 | Crygb         | 0 | 1 | 0.113855    | 0         | 0         | No change |
| NM_144785 | Slc22a19      | 0 | 1 | -0.886145   | 0.0351452 | 0         | No change |
| NM_144790 | Ankrd33       | 0 | 1 | 0.113855    | 0         | 0         | No change |
| NM_144793 | Slc25a38      | 0 | 1 | -0.0715002  | 6.17142   | 5.58526   | No change |
| NM_144795 | Pycr1         | 0 | 1 | 0.561314    | 0.502248  | 0.714461  | No change |
| NM_144798 | Slc30a6       | 0 | 1 | -0.104325   | 3.69386   | 3.26629   | No change |
| NM_144799 | Lmcd1         | 0 | 1 | 0.168303    | 2.05691   | 2.20192   | No change |
| NM_144803 | Chrna2        | 0 | 1 | -0.250909   | 1.83766   | 1.46554   | No change |
| NM_144809 | Prdm9         | 0 | 1 | -0.411774   | 2.61852   | 1.8674    | No change |
| NM_144810 | Klhdc8a       | 0 | 1 | -0.663753   | 0.179579  | 0.100901  | No change |
| NM_144811 | Cbx7          | 0 | 1 | -0.172966   | 11.4669   | 9.67801   | No change |
| NM_144815 | Cecr5         | 0 | 1 | -0.19317    | 11.3963   | 9.48183   | No change |
| NM_144821 | Al317395      | 0 | 1 | -0.371572   | 0.702392  | 0.509156  | No change |
| NM_144824 | Wrap53        | 0 | 1 | -0.0963629  | 4.30067   | 3.82431   | No change |
| NM_144828 | Ppp1r1b       | 0 | 1 | 0.113855    | 1.17131   | 1.20657   | No change |
| NM_144830 | Tmem106a      | 0 | 1 | -0.270809   | 1.39325   | 1.092     | No change |
| NM_144834 | Serpina10     | 0 | 1 | -1.47111    | 0.221952  | 0.0457267 | No change |
| NM_144836 | Slc17a2       | 0 | 1 | -1.88615    | 0.0703022 | 0         | No change |
| NM_144838 | Sgtb          | 0 | 1 | 0.60418     | 1.05634   | 1.53933   | No change |
| NM_144841 | Otx2          | 0 | 1 | 0.113855    | 0         | 0         | No change |
| NM_144844 | Pcca          | 0 | 1 | -0.0545427  | 3.13257   | 2.86833   | No change |
| NM_144853 | Cyrr1         | 0 | 1 | -0.326718   | 0.617055  | 0.459067  | No change |
| NM_144854 | ORF63         | 0 | 1 | 0.48825     | 1.09686   | 1.47754   | No change |
| NM_144855 | Cbs           | 0 | 1 | 0.435783    | 1.12408   | 1.45482   | No change |
| NM_144856 | Slc22a7       | 0 | 1 | -1.88615    | 0.104175  | 0         | No change |
| NM_144858 | Dus3l         | 0 | 1 | 0.337895    | 3.75084   | 4.5181    | No change |
| NM_144860 | Mib1          | 0 | 1 | 0.0833435   | 12.2739   | 12.3784   | No change |
| NM_144862 | Lims2         | 0 | 1 | -0.41666    | 2.64239   | 1.87133   | No change |
| NM_144866 | Etf1          | 0 | 1 | 0.0491012   | 41.5524   | 40.9238   | No change |
| NM_144869 | BC021614      | 0 | 1 | 1.52889     | 0.206498  | 0.744499  | No change |
| NM_144877 | Mettl13       | 0 | 1 | -0.161005   | 2.42302   | 2.05852   | No change |
| NM_144878 | Fmo4          | 0 | 1 | -0.886145   | 0.117     | 0.040174  | No change |
| NM_144881 | Hhat          | 0 | 1 | 0.34518     | 1.67165   | 2.02585   | No change |
| NM_144886 | Exosc2        | 0 | 1 | 0.0757197   | 4.89827   | 4.91295   | No change |
| NM_144891 | Gdap111       | 0 | 1 | 0.528892    | 0.135064  | 0.194782  | No change |
| NM_144893 | Slc35c2       | 0 | 1 | 0.145865    | 11.7732   | 12.4006   | No change |
| NM_144903 | Aldob         | 0 | 1 | -0.181601   | 1.89131   | 1.58065   | No change |
| NM_144907 | Sesn2         | 0 | 1 | -0.264657   | 4.75119   | 3.75855   | No change |
| NM_144909 | Gckr          | 0 | 1 | -1.30118    | 0.24223   | 0.0712919 | No change |
| NM_144916 | Tmem150a      | 0 | 1 | 0.226623    | 11.3078   | 12.5991   | No change |
| NM_144918 | Smyd5         | 0 | 1 | -0.00643942 | 3.46648   | 3.28286   | No change |
| NM_144919 | Hdac11        | 0 | 1 | 0.00295692  | 24.1438   | 23.0284   | No change |
| NM_144921 | Atp1a3        | 0 | 1 | -1.88615    | 0.0537063 | 0         | No change |
| NM_144923 | Blvrb         | 0 | 1 | 0.453705    | 5.0759    | 6.63963   | No change |
| NM_144929 | Rtbdn         | 0 | 1 | -1.05607    | 0.292214  | 0.112879  | No change |
| NM_144930 | Ces1f         | 0 | 1 | 0.898126    | 0.618684  | 1.12466   | No change |
| NM_144933 | Med17         | 0 | 1 | 0.0906652   | 7.82705   | 7.93382   | No change |
| NM_144934 | Mbd3l2        | 0 | 1 | -2.6935     | 0.194041  | 0         | No change |
| NM_144936 | Tmem45b       | 0 | 1 | -0.321082   | 3.18596   | 2.41582   | No change |
| NM_144940 | Uroc1         | 0 | 1 | 0.85082     | 0.228026  | 0.405719  | No change |
| NM_144943 | Cd207         | 0 | 1 | 0.113855    | 0         | 0         | No change |

|           |               |   |   |            |           |           |           |
|-----------|---------------|---|---|------------|-----------|-----------|-----------|
| NM_144944 | Prokr2        | 0 | 1 | -1.47111   | 0.0307491 | 0         | No change |
| NM_144945 | Lgi2          | 0 | 1 | 0.361782   | 0.542498  | 0.670595  | No change |
| NM_144946 | Neto1         | 0 | 1 | 1.11385    | 0         | 0.0203316 | No change |
| NM_144948 | Rbm7          | 0 | 1 | 0.0730852  | 37.2722   | 37.3234   | No change |
| NM_144955 | Nkx6-1        | 0 | 1 | -1.47111   | 0.0776523 | 0         | No change |
| NM_145066 | Gpr85         | 0 | 1 | 0.3065     | 0.1417    | 0.170294  | No change |
| NM_145073 | Hist1h3g      | 0 | 1 | 0.223479   | 5.24114   | 5.83666   | No change |
| NM_145077 | Ucn2          | 0 | 1 | -0.301183  | 0.208661  | 0.143295  | No change |
| NM_145099 | Trpv3         | 0 | 1 | 0.961852   | 0.114251  | 0.23538   | No change |
| NM_145100 | Lypd1         | 0 | 1 | 0.309111   | 2.31855   | 2.73958   | No change |
| NM_145124 | Mib2          | 0 | 1 | -0.0348469 | 6.94954   | 6.45582   | No change |
| NM_145126 | Chi3l4        | 0 | 1 | -0.886145  | 0.0461543 | 0         | No change |
| NM_145129 | Chrna3        | 0 | 1 | -0.886145  | 0.022316  | 0         | No change |
| NM_145132 | Mchr1         | 0 | 1 | 1.11385    | 0.159189  | 0.360759  | No change |
| NM_145134 | Spsb4         | 0 | 1 | 0.573286   | 0.218571  | 0.321644  | No change |
| NM_145137 | Mgl2          | 0 | 1 | 0.113855   | 0.539558  | 0.555801  | No change |
| NM_145138 | Nek9          | 0 | 1 | 0.0920853  | 18.9954   | 19.274    | No change |
| NM_145140 | Abcc10        | 0 | 1 | 0.472309   | 0.983389  | 1.30242   | No change |
| NM_145142 | Chst10        | 0 | 1 | 0.0785217  | 2.74839   | 2.76208   | No change |
| NM_145144 | Aif1l         | 0 | 1 | -0.234068  | 0.96763   | 0.777958  | No change |
| NM_145146 | Afm           | 0 | 1 | -2.6935    | 0.206804  | 0         | No change |
| NM_145152 | Lrrc3         | 0 | 1 | 0.134613   | 1.10315   | 1.15307   | No change |
| NM_145153 | Oas1f         | 0 | 1 | 0.113855   | 0         | 0         | No change |
| NM_145154 | Angptl6       | 0 | 1 | 0.511614   | 2.76276   | 3.76398   | No change |
| NM_145155 | Wasf3         | 0 | 1 | -0.371572  | 0.882518  | 0.641707  | No change |
| NM_145156 | Slc25a28      | 0 | 1 | -0.105402  | 17.3551   | 15.3504   | No change |
| NM_145157 | Defb19        | 0 | 1 | -0.0193763 | 232.428   | 218.288   | No change |
| NM_145209 | Oasl1         | 0 | 1 | -0.886145  | 0.426558  | 0.202799  | No change |
| NM_145210 | Oas1e         | 0 | 1 | 0.113855   | 0         | 0         | No change |
| NM_145211 | Oas1a         | 0 | 1 | 0.565234   | 1.77185   | 2.50964   | No change |
| NM_145217 | Diras1        | 0 | 1 | -0.886145  | 0.0238674 | 0         | No change |
| NM_145218 | Wbscr17       | 0 | 1 | -1.10854   | 0.448453  | 0.188203  | No change |
| NM_145226 | Oas3          | 0 | 1 | 0.113855   | 0.192032  | 0.197813  | No change |
| NM_145229 | AY074887      | 0 | 1 | 0.113855   | 0.0998466 | 0.102852  | No change |
| NM_145353 | Yipf3         | 0 | 1 | 0.140948   | 7.1919    | 7.54952   | No change |
| NM_145355 | Rnf185        | 0 | 1 | 0.0418912  | 14.4637   | 14.1729   | No change |
| NM_145356 | Zbtb7c        | 0 | 1 | -0.371572  | 0.198165  | 0.141321  | No change |
| NM_145360 | Idi1          | 0 | 1 | 0.0472451  | 23.1418   | 22.7618   | No change |
| NM_145363 | Tspan10       | 0 | 1 | -0.623111  | 0.135064  | 0.0695649 | No change |
| NM_145364 | Akr1d1        | 0 | 1 | 0.113855   | 0         | 0         | No change |
| NM_145365 | Creb3l3       | 0 | 1 | -1.20807   | 0.122108  | 0.0314459 | No change |
| NM_145368 | Acnat2        | 0 | 1 | -0.345577  | 0.42009   | 0.302915  | No change |
| NM_145369 | Wfdc5         | 0 | 1 | -2.88615   | 0.209918  | 0         | No change |
| NM_145371 | Eif2b1        | 0 | 1 | 0.00380127 | 12.6943   | 12.1133   | No change |
| NM_145373 | Sectm1a       | 0 | 1 | -0.54101   | 3.15021   | 2.04482   | No change |
| NM_145376 | Lpcat1        | 0 | 1 | 0.721537   | 0.868448  | 1.38662   | No change |
| NM_145379 | Mrgprf        | 0 | 1 | 0.492366   | 0.31268   | 0.429457  | No change |
| NM_145383 | Rho           | 0 | 1 | -1.30118   | 0.323051  | 0.110925  | No change |
| NM_145389 | BC016579      | 0 | 1 | 0.830062   | 0.413325  | 0.72053   | No change |
| NM_145395 | Duoxa1        | 0 | 1 | 0.113855   | 0.139665  | 0.14387   | No change |
| NM_145403 | Tmprss4       | 0 | 1 | 1.11385    | 0         | 0.0316678 | No change |
| NM_145414 | Nsun5         | 0 | 1 | 0.00138008 | 3.69913   | 3.5223    | No change |
| NM_145415 | Diexf         | 0 | 1 | 0.102173   | 1.5451    | 1.57868   | No change |
| NM_145419 | Hkdc1         | 0 | 1 | -0.471108  | 0.0400189 | 0.0206118 | No change |
| NM_145423 | Slc5a8        | 0 | 1 | -0.0116761 | 0.143805  | 0.134667  | No change |
| NM_145424 | BC089597      | 0 | 1 | -0.471108  | 0.110186  | 0.0567518 | No change |
| NM_145426 | Mfap3         | 0 | 1 | 0.0694607  | 7.07819   | 7.06988   | No change |
| NM_145430 | BC017647      | 0 | 1 | 0.282126   | 3.46311   | 4.01098   | No change |
| NM_145431 | Nle1          | 0 | 1 | 0.371653   | 1.77486   | 2.19395   | No change |
| NM_145432 | Heatr6        | 0 | 1 | 0.0329348  | 2.01474   | 1.9615    | No change |
| NM_145434 | Nr1d1         | 0 | 1 | -0.242289  | 3.36924   | 2.70548   | No change |
| NM_145435 | Pyy           | 0 | 1 | -0.886145  | 0.139946  | 0         | No change |
| NM_145437 | Cd300ld       | 0 | 1 | -0.248715  | 0.486363  | 0.383121  | No change |
| NM_145439 | Tmc6          | 0 | 1 | 0.177549   | 6.86878   | 7.39605   | No change |
| NM_145440 | Uts2r         | 0 | 1 | 0.113855   | 0         | 0         | No change |
| NM_145442 | Mbip          | 0 | 1 | -0.0560702 | 7.44069   | 6.80776   | No change |
| NM_145444 | Acot5         | 0 | 1 | 1.11385    | 0.0918221 | 0.236466  | No change |
| NM_145449 | Ifi27l2b      | 0 | 1 | -1.47111   | 0.127526  | 0         | No change |
| NM_145460 | Oxnad1        | 0 | 1 | 0.0272671  | 6.92874   | 6.71952   | No change |
| NM_145462 | Haus4         | 0 | 1 | 0.0887638  | 43.2562   | 43.7893   | No change |
| NM_145467 | Itgbl1        | 0 | 1 | 0.393963   | 2.86814   | 3.59412   | No change |
| NM_145472 | C030006K11Rik | 0 | 1 | 0.290733   | 1.78293   | 2.08149   | No change |
| NM_145474 | Cyp2d34       | 0 | 1 | -2.47111   | 0.214836  | 0         | No change |
| NM_145482 | Setd4         | 0 | 1 | 0.204053   | 2.32946   | 2.55694   | No change |
| NM_145484 | Zfp758        | 0 | 1 | -0.0450488 | 7.61607   | 7.0246    | No change |
| NM_145488 | Pex6          | 0 | 1 | -0.118319  | 3.20152   | 2.80433   | No change |

|           |               |   |   |            |           |           |           |
|-----------|---------------|---|---|------------|-----------|-----------|-----------|
| NM_145489 | Al661453      | 0 | 1 | 0.113855   | 0.1108    | 0.114135  | No change |
| NM_145492 | Zfp521        | 0 | 1 | 0.175255   | 0.509865  | 0.548557  | No change |
| NM_145499 | Cyp2c70       | 0 | 1 | 0.113855   | 0         | 0         | No change |
| NM_145501 | Pi4k2a        | 0 | 1 | -0.128301  | 6.3206    | 5.50188   | No change |
| NM_145509 | 5430435G22Rik | 0 | 1 | 0.67457    | 1.0773    | 1.65037   | No change |
| NM_145510 | Rabif         | 0 | 1 | 0.220164   | 12.0602   | 13.3761   | No change |
| NM_145519 | Farp2         | 0 | 1 | -0.168288  | 2.69009   | 2.27558   | No change |
| NM_145523 | Gca           | 0 | 1 | 0.0682579  | 4.74794   | 4.73803   | No change |
| NM_145528 | Atg13         | 0 | 1 | 0.149774   | 9.3409    | 9.86518   | No change |
| NM_145536 | BC020535      | 0 | 1 | 0.113855   | 0.226066  | 0.232872  | No change |
| NM_145540 | Ints3         | 0 | 1 | 0.119637   | 11.6572   | 12.0564   | No change |
| NM_145551 | Slc5a9        | 0 | 1 | 0.546814   | 0.303708  | 0.428111  | No change |
| NM_145558 | Hadhb         | 0 | 1 | -0.164366  | 27.2836   | 23.1691   | No change |
| NM_145561 | Tmprss11d     | 0 | 1 | 1.11385    | 0         | 0.0350885 | No change |
| NM_145565 | Sds           | 0 | 1 | -0.371572  | 0.359242  | 0.246704  | No change |
| NM_145572 | Gys2          | 0 | 1 | 2.11385    | 0         | 0.0810587 | No change |
| NM_145575 | Cald1         | 0 | 1 | 0.183352   | 6.63249   | 7.1702    | No change |
| NM_145580 | Tmem149       | 0 | 1 | 0.656997   | 1.99794   | 3.0266    | No change |
| NM_145581 | Siglec5       | 0 | 1 | -1.47111   | 0.0569852 | 0         | No change |
| NM_145584 | Spon1         | 0 | 1 | 0.0355878  | 3.41344   | 3.32991   | No change |
| NM_145589 | Prr14         | 0 | 1 | -0.164301  | 6.42472   | 5.45208   | No change |
| NM_145592 | Dkk4          | 0 | 1 | 1.11385    | 0         | 0.0546354 | No change |
| NM_145598 | Nxn1          | 0 | 1 | 0.113855   | 0.2007    | 0.206741  | No change |
| NM_145600 | Zfp330        | 0 | 1 | -0.0659662 | 27.1217   | 24.659    | No change |
| NM_145603 | Ces2c         | 0 | 1 | 0.113855   | 0         | 0         | No change |
| NM_145604 | D230025D16Rik | 0 | 1 | -0.175652  | 4.24809   | 3.5758    | No change |
| NM_145605 | Klhdc4        | 0 | 1 | 0.15671    | 6.62468   | 7.0309    | No change |
| NM_145610 | Ppan          | 0 | 1 | 0.0171788  | 4.46268   | 4.29629   | No change |
| NM_145611 | Kank2         | 0 | 1 | 0.236061   | 2.58494   | 2.89945   | No change |
| NM_145618 | Narg2         | 0 | 1 | 0.268577   | 4.56663   | 5.23866   | No change |
| NM_145620 | Rrp9          | 0 | 1 | -0.264657  | 2.90198   | 2.28872   | No change |
| NM_145635 | Adig          | 0 | 1 | 0.0733757  | 27.789    | 27.8304   | No change |
| NM_145636 | Il27          | 0 | 1 | -1.88615   | 0.296566  | 0         | No change |
| NM_145706 | Nup43         | 0 | 1 | -0.159164  | 4.6462    | 3.95129   | No change |
| NM_145707 | Obox3         | 0 | 1 | 0.113855   | 0         | 0         | No change |
| NM_145708 | Obox2         | 0 | 1 | 0.113855   | 0         | 0         | No change |
| NM_145709 | Obox5         | 0 | 1 | 0.113855   | 0         | 0         | No change |
| NM_145710 | Obox6         | 0 | 1 | 0.113855   | 0         | 0         | No change |
| NM_145712 | Mtnr1b        | 0 | 1 | 0.113855   | 0         | 0         | No change |
| NM_145741 | Gdf10         | 0 | 1 | 0.712492   | 0.944424  | 1.4879    | No change |
| NM_145743 | Lace1         | 0 | 1 | 0.322172   | 2.82876   | 3.371     | No change |
| NM_145819 | Mzf1          | 0 | 1 | -0.0787903 | 0.936679  | 0.841701  | No change |
| NM_145827 | Nlrp3         | 0 | 1 | -0.127153  | 0.207987  | 0.17854   | No change |
| NM_145829 | Nags          | 0 | 1 | -0.248715  | 0.747967  | 0.589194  | No change |
| NM_145834 | Il17c         | 0 | 1 | 0.113855   | 0         | 0         | No change |
| NM_145835 | Lctl          | 0 | 1 | -1.20807   | 0.770442  | 0.297613  | No change |
| NM_145840 | Rgs9bp        | 0 | 1 | 0.757711   | 0.158657  | 0.261494  | No change |
| NM_145841 | Sgcz          | 0 | 1 | 0.113855   | 0         | 0         | No change |
| NM_145842 | Vmn1r69       | 0 | 1 | 0.113855   | 0         | 0         | No change |
| NM_145843 | Vmn1r72       | 0 | 1 | 0.113855   | 0         | 0         | No change |
| NM_145844 | Vmn1r189      | 0 | 1 | 1.11385    | 0         | 0.0764547 | No change |
| NM_145845 | Vmn1r192      | 0 | 1 | 0.113855   | 0         | 0         | No change |
| NM_145847 | Vmn1r85       | 0 | 1 | 0.113855   | 0         | 0         | No change |
| NM_145848 | Vmn1r71       | 0 | 1 | 0.113855   | 0         | 0         | No change |
| NM_145849 | Vmn1r191      | 0 | 1 | 0.113855   | 0         | 0         | No change |
| NM_145850 | Vmn1r188      | 0 | 1 | 0.113855   | 0         | 0         | No change |
| NM_145856 | Il17f         | 0 | 1 | -0.886145  | 0.0593131 | 0         | No change |
| NM_145857 | Nod2          | 0 | 1 | 0.113855   | 0.135736  | 0.139822  | No change |
| NM_145920 | Evc2          | 0 | 1 | -0.22318   | 0.796781  | 0.646136  | No change |
| NM_145921 | Olah          | 0 | 1 | -1.6935    | 0.277293  | 0.0476067 | No change |
| NM_145927 | Fntb          | 0 | 1 | 0.326158   | 2.20513   | 2.63607   | No change |
| NM_145932 | Osta          | 0 | 1 | -1.20807   | 0.180552  | 0.0464967 | No change |
| NM_145935 | Glyat         | 0 | 1 | 0.698817   | 0.0532007 | 0.109605  | No change |
| NM_145938 | Rpp40         | 0 | 1 | 0.397648   | 2.318     | 2.91257   | No change |
| NM_145939 | Alg3          | 0 | 1 | 0.0777856  | 3.91259   | 3.92961   | No change |
| NM_145950 | Osgin2        | 0 | 1 | -0.16032   | 5.45011   | 4.6378    | No change |
| NM_145960 | Mtrf1         | 0 | 1 | -0.134073  | 2.09603   | 1.81212   | No change |
| NM_145967 | Vstm2a        | 0 | 1 | -0.191     | 0.384089  | 0.316521  | No change |
| NM_145968 | Tagap         | 0 | 1 | -0.218601  | 10.105    | 8.26203   | No change |
| NM_145972 | BC027231      | 0 | 1 | -0.347372  | 5.13581   | 3.83555   | No change |
| NM_145974 | N4bp3         | 0 | 1 | 0.242803   | 6.63871   | 7.48055   | No change |
| NM_145978 | Pdlim2        | 0 | 1 | -0.301183  | 2.90004   | 2.22865   | No change |
| NM_145979 | Chd4          | 0 | 1 | 0.0630902  | 28.2243   | 28.0683   | No change |
| NM_145981 | Phyhip        | 0 | 1 | 0.568421   | 0.649701  | 0.926667  | No change |
| NM_145983 | Kcna5         | 0 | 1 | 1.11385    | 0         | 0.0238905 | No change |
| NM_145998 | Hmx2          | 0 | 1 | 0.113855   | 0         | 0         | No change |

|           |               |   |   |            |           |           |           |
|-----------|---------------|---|---|------------|-----------|-----------|-----------|
| NM_145999 | Rhot2         | 0 | 1 | -0.0213726 | 9.40656   | 8.82047   | No change |
| NM_146000 | Bud13         | 0 | 1 | -0.388646  | 2.65136   | 1.91833   | No change |
| NM_146002 | Rhbdd2        | 0 | 1 | -0.0661239 | 5.39698   | 4.9054    | No change |
| NM_146003 | Senp6         | 0 | 1 | 0.036913   | 13.8454   | 13.5208   | No change |
| NM_146004 | Mfsd6l        | 0 | 1 | -0.127153  | 4.36427   | 3.79865   | No change |
| NM_146008 | Tcp11l2       | 0 | 1 | 0.336247   | 4.84947   | 5.83302   | No change |
| NM_146016 | Eml6          | 0 | 1 | 0.183477   | 5.39948   | 5.83746   | No change |
| NM_146017 | Gabrp         | 0 | 1 | -1.88615   | 0.0637435 | 0         | No change |
| NM_146018 | Ficn          | 0 | 1 | 0.132838   | 11.0492   | 11.5329   | No change |
| NM_146020 | Gltpd2        | 0 | 1 | 0.113855   | 0         | 0         | No change |
| NM_146027 | Scrn2         | 0 | 1 | 0.400736   | 4.54519   | 5.72247   | No change |
| NM_146032 | Srp68         | 0 | 1 | 0.0551503  | 26.2659   | 25.9766   | No change |
| NM_146036 | Ahsa1         | 0 | 1 | 0.132411   | 16.2617   | 16.9688   | No change |
| NM_146045 | B4gal7        | 0 | 1 | 0.233436   | 3.49338   | 3.91342   | No change |
| NM_146051 | 3830406C13Rik | 0 | 1 | -0.150348  | 20.8207   | 17.8535   | No change |
| NM_146052 | Lrrc3b        | 0 | 1 | 2.43578    | 0.0419837 | 0.389228  | No change |
| NM_146063 | Krt79         | 0 | 1 | 1.69882    | 0         | 0.0684702 | No change |
| NM_146064 | Soat2         | 0 | 1 | -0.14918   | 0.163906  | 0.135072  | No change |
| NM_146065 | Atf7          | 0 | 1 | 0.0704622  | 3.2722    | 3.27009   | No change |
| NM_146067 | Cpped1        | 0 | 1 | 0.275822   | 5.26034   | 6.0657    | No change |
| NM_146068 | 2310008H04Rik | 0 | 1 | -0.0603499 | 4.48805   | 4.09479   | No change |
| NM_146069 | Lrrc33        | 0 | 1 | 0.0425961  | 1.60574   | 1.57339   | No change |
| NM_146075 | Lemd2         | 0 | 1 | -0.0529643 | 9.31566   | 8.54523   | No change |
| NM_146077 | Trim31        | 0 | 1 | 0.113855   | 0.0310022 | 0.0319355 | No change |
| NM_146079 | Guca1b        | 0 | 1 | 0.113855   | 0.0417823 | 0.0430402 | No change |
| NM_146085 | Apbb3         | 0 | 1 | 0.0870548  | 5.47539   | 5.53577   | No change |
| NM_146086 | Pde6a         | 0 | 1 | 0.113855   | 0.0830073 | 0.0855062 | No change |
| NM_146093 | Ubxn1         | 0 | 1 | 0.0903321  | 24.9626   | 25.2971   | No change |
| NM_146100 | Ina           | 0 | 1 | 1.03985    | 0.277661  | 0.57204   | No change |
| NM_146101 | Habp2         | 0 | 1 | 0.85082    | 0.0674665 | 0.138995  | No change |
| NM_146103 | Tmem185b      | 0 | 1 | -0.362583  | 5.37921   | 3.9729    | No change |
| NM_146117 | Lrrc26        | 0 | 1 | -2.88615   | 0.404184  | 0         | No change |
| NM_146125 | Itпка         | 0 | 1 | -1.60235   | 0.848034  | 0.238244  | No change |
| NM_146129 | Pcif1         | 0 | 1 | 0.27058    | 4.60905   | 5.29563   | No change |
| NM_146139 | Vav3          | 0 | 1 | 0.402286   | 2.78956   | 3.51474   | No change |
| NM_146140 | Tram111       | 0 | 1 | -1.20807   | 0.125347  | 0.0322801 | No change |
| NM_146141 | Ppa2          | 0 | 1 | -0.283293  | 10.7043   | 8.35882   | No change |
| NM_146148 | C8a           | 0 | 1 | -0.54911   | 0.345109  | 0.217249  | No change |
| NM_146149 | Fam151a       | 0 | 1 | 0.376889   | 0.514339  | 0.643356  | No change |
| NM_146154 | Ppp1r8        | 0 | 1 | 0.118287   | 11.0635   | 11.4317   | No change |
| NM_146167 | Gimap7        | 0 | 1 | 0.354863   | 0.549196  | 0.678874  | No change |
| NM_146169 | Paip2b        | 0 | 1 | -0.0430512 | 21.952    | 20.2803   | No change |
| NM_146176 | Cnot3         | 0 | 1 | 0.228314   | 2.59099   | 2.89141   | No change |
| NM_146182 | Klc3          | 0 | 1 | 0.152587   | 17.1888   | 18.1892   | No change |
| NM_146188 | Kctd15        | 0 | 1 | 0.403361   | 1.27187   | 1.60793   | No change |
| NM_146189 | Mybpc2        | 0 | 1 | -0.623111  | 0.173078  | 0.0990494 | No change |
| NM_146190 | Tubgcp5       | 0 | 1 | 0.0538727  | 4.16529   | 4.11516   | No change |
| NM_146194 | Picalm        | 0 | 1 | -0.0538377 | 21.5041   | 19.7185   | No change |
| NM_146198 | Slc5a11       | 0 | 1 | 0.113855   | 0         | 0         | No change |
| NM_146205 | Armc5         | 0 | 1 | -0.105458  | 2.81753   | 2.4904    | No change |
| NM_146213 | Ces4a         | 0 | 1 | -0.886145  | 0.0859346 | 0.0295072 | No change |
| NM_146214 | Tat           | 0 | 1 | 1.11385    | 0         | 0.0302023 | No change |
| NM_146217 | Aars          | 0 | 1 | -0.118534  | 15.1184   | 13.2544   | No change |
| NM_146219 | Klhl36        | 0 | 1 | -0.152425  | 2.8632    | 2.44666   | No change |
| NM_146222 | BC024479      | 0 | 1 | -0.18645   | 4.50221   | 3.76033   | No change |
| NM_146223 | Cplx3         | 0 | 1 | -0.886145  | 0.0243767 | 0         | No change |
| NM_146232 | BC014805      | 0 | 1 | -0.886145  | 0.0347769 | 0         | No change |
| NM_146239 | Cdk17         | 0 | 1 | 0.0475123  | 6.79138   | 6.68052   | No change |
| NM_146242 | Lrrc10        | 0 | 1 | -1.20807   | 0.195218  | 0.0502738 | No change |
| NM_146244 | Rps6kl1       | 0 | 1 | 0.735343   | 0.330038  | 0.538291  | No change |
| NM_146245 | Lrit1         | 0 | 1 | -1.88615   | 0.0484315 | 0         | No change |
| NM_146246 | Rp11l         | 0 | 1 | -0.471108  | 0.0206223 | 0.0106215 | No change |
| NM_146250 | Gpr1          | 0 | 1 | -1.88615   | 0.13043   | 0         | No change |
| NM_146252 | Tbc1d13       | 0 | 1 | -0.063023  | 4.67967   | 4.26194   | No change |
| NM_146257 | Slc29a4       | 0 | 1 | 1.05245    | 0.274874  | 0.566297  | No change |
| NM_146259 | Zfp668        | 0 | 1 | 0.316163   | 1.85794   | 2.20511   | No change |
| NM_146260 | Tmie          | 0 | 1 | 0.320306   | 0.343174  | 0.412422  | No change |
| NM_146262 | Olf1290       | 0 | 1 | 0.113855   | 0         | 0         | No change |
| NM_146263 | Olf1274-ps    | 0 | 1 | 0.113855   | 0         | 0         | No change |
| NM_146265 | Olf1506       | 0 | 1 | 0.113855   | 0         | 0         | No change |
| NM_146266 | Olf1772       | 0 | 1 | -0.886145  | 0.0694153 | 0         | No change |
| NM_146267 | Olf1769       | 0 | 1 | 0.113855   | 0         | 0         | No change |
| NM_146269 | Olf1247       | 0 | 1 | 0.113855   | 0         | 0         | No change |
| NM_146270 | Olf1370       | 0 | 1 | 0.113855   | 0         | 0         | No change |
| NM_146271 | Olf1511       | 0 | 1 | 0.113855   | 0         | 0         | No change |
| NM_146272 | Olf1930       | 0 | 1 | -1.47111   | 0.375906  | 0.0774444 | No change |

|           |          |   |   |           |           |           |           |
|-----------|----------|---|---|-----------|-----------|-----------|-----------|
| NM_146273 | Olfr448  | 0 | 1 | 0.113855  | 0         | 0         | No change |
| NM_146274 | Olfr1311 | 0 | 1 | 0.113855  | 0         | 0         | No change |
| NM_146275 | Olfr1402 | 0 | 1 | 0.113855  | 0         | 0         | No change |
| NM_146276 | Olfr1394 | 0 | 1 | 0.113855  | 0         | 0         | No change |
| NM_146277 | Olfr1412 | 0 | 1 | 0.113855  | 0         | 0         | No change |
| NM_146278 | Olfr729  | 0 | 1 | 0.113855  | 0         | 0         | No change |
| NM_146279 | Olfr960  | 0 | 1 | -0.886145 | 0.0732838 | 0         | No change |
| NM_146280 | Olfr281  | 0 | 1 | 0.113855  | 0         | 0         | No change |
| NM_146281 | Olfr284  | 0 | 1 | 0.113855  | 0         | 0         | No change |
| NM_146282 | Olfr846  | 0 | 1 | 0.113855  | 0         | 0         | No change |
| NM_146283 | Olfr1366 | 0 | 1 | 1.11385   | 0         | 0.0681129 | No change |
| NM_146284 | Olfr780  | 0 | 1 | 0.113855  | 0         | 0         | No change |
| NM_146285 | Olfr801  | 0 | 1 | 0.113855  | 0         | 0         | No change |
| NM_146286 | Olfr981  | 0 | 1 | -2.20807  | 0.298791  | 0         | No change |
| NM_146287 | Olfr114  | 0 | 1 | 0.113855  | 0         | 0         | No change |
| NM_146288 | Olfr122  | 0 | 1 | 0.113855  | 0         | 0         | No change |
| NM_146289 | Olfr113  | 0 | 1 | -2.20807  | 0.296882  | 0         | No change |
| NM_146290 | Olfr125  | 0 | 1 | -0.886145 | 0.0623372 | 0         | No change |
| NM_146291 | Olfr1484 | 0 | 1 | 0.113855  | 0         | 0         | No change |
| NM_146292 | Olfr1324 | 0 | 1 | 0.113855  | 0         | 0         | No change |
| NM_146293 | Olfr1143 | 0 | 1 | 0.113855  | 0         | 0         | No change |
| NM_146294 | Olfr1167 | 0 | 1 | 0.113855  | 0         | 0         | No change |
| NM_146295 | Olfr446  | 0 | 1 | -1.47111  | 0.150362  | 0         | No change |
| NM_146296 | Olfr437  | 0 | 1 | -0.886145 | 0.0746977 | 0         | No change |
| NM_146297 | Olfr1115 | 0 | 1 | 0.113855  | 0         | 0         | No change |
| NM_146298 | Olfr746  | 0 | 1 | 0.113855  | 0         | 0         | No change |
| NM_146299 | Olfr745  | 0 | 1 | 0.113855  | 0         | 0         | No change |
| NM_146300 | Olfr827  | 0 | 1 | 0.113855  | 0         | 0         | No change |
| NM_146301 | Olfr1475 | 0 | 1 | 0.113855  | 0         | 0         | No change |
| NM_146302 | Olfr1461 | 0 | 1 | 0.113855  | 0         | 0         | No change |
| NM_146303 | Olfr1449 | 0 | 1 | 0.113855  | 0         | 0         | No change |
| NM_146304 | Olfr1340 | 0 | 1 | -1.47111  | 0.147032  | 0         | No change |
| NM_146305 | Olfr420  | 0 | 1 | -1.88615  | 0.199884  | 0         | No change |
| NM_146306 | Olfr518  | 0 | 1 | 0.113855  | 0         | 0         | No change |
| NM_146307 | Olfr498  | 0 | 1 | 0.113855  | 0         | 0         | No change |
| NM_146308 | Olfr1356 | 0 | 1 | 0.113855  | 0         | 0         | No change |
| NM_146309 | Olfr1337 | 0 | 1 | 0.376889  | 0.294063  | 0.378644  | No change |
| NM_146310 | Olfr493  | 0 | 1 | 0.113855  | 0         | 0         | No change |
| NM_146311 | Olfr510  | 0 | 1 | 0.113855  | 0         | 0         | No change |
| NM_146312 | Olfr657  | 0 | 1 | 0.698817  | 0.0725968 | 0.149565  | No change |
| NM_146313 | Olfr145  | 0 | 1 | 0.113855  | 0         | 0         | No change |
| NM_146314 | Olfr601  | 0 | 1 | 0.113855  | 0         | 0         | No change |
| NM_146315 | Olfr62   | 0 | 1 | -1.47111  | 0.147032  | 0         | No change |
| NM_146316 | Olfr726  | 0 | 1 | 0.113855  | 0         | 0         | No change |
| NM_146317 | Olfr725  | 0 | 1 | 0.113855  | 0         | 0         | No change |
| NM_146318 | Olfr767  | 0 | 1 | 0.113855  | 0         | 0         | No change |
| NM_146319 | Olfr727  | 0 | 1 | 0.113855  | 0         | 0         | No change |
| NM_146320 | Olfr1145 | 0 | 1 | 0.113855  | 0         | 0         | No change |
| NM_146321 | Olfr186  | 0 | 1 | -0.886145 | 0.374693  | 0.154389  | No change |
| NM_146322 | Olfr187  | 0 | 1 | -2.20807  | 0.25646   | 0         | No change |
| NM_146323 | Olfr1232 | 0 | 1 | 0.113855  | 0         | 0         | No change |
| NM_146324 | Olfr809  | 0 | 1 | 0.113855  | 0         | 0         | No change |
| NM_146325 | Olfr554  | 0 | 1 | -3.20807  | 0.657481  | 0         | No change |
| NM_146326 | Olfr943  | 0 | 1 | 0.113855  | 0         | 0         | No change |
| NM_146327 | Olfr129  | 0 | 1 | -0.886145 | 0.0562948 | 0         | No change |
| NM_146328 | Olfr110  | 0 | 1 | -0.886145 | 0.0630135 | 0         | No change |
| NM_146329 | Olfr642  | 0 | 1 | -0.886145 | 0.0737491 | 0         | No change |
| NM_146330 | Olfr958  | 0 | 1 | 0.113855  | 0         | 0         | No change |
| NM_146331 | Olfr954  | 0 | 1 | 0.113855  | 0         | 0         | No change |
| NM_146332 | Olfr135  | 0 | 1 | 0.113855  | 0         | 0         | No change |
| NM_146334 | Olfr1330 | 0 | 1 | -1.47111  | 0.147032  | 0         | No change |
| NM_146336 | Olfr893  | 0 | 1 | -0.886145 | 0.073984  | 0         | No change |
| NM_146337 | Olfr1396 | 0 | 1 | 1.69882   | 0         | 0.146363  | No change |
| NM_146338 | Olfr374  | 0 | 1 | -1.47111  | 0.129061  | 0         | No change |
| NM_146339 | Olfr77   | 0 | 1 | 0.113855  | 0         | 0         | No change |
| NM_146341 | Olfr1259 | 0 | 1 | 0.113855  | 0         | 0         | No change |
| NM_146342 | Olfr1269 | 0 | 1 | 0.113855  | 0         | 0         | No change |
| NM_146343 | Olfr1265 | 0 | 1 | 0.113855  | 0         | 0         | No change |
| NM_146344 | Olfr1495 | 0 | 1 | -1.47111  | 0.145194  | 0         | No change |
| NM_146345 | Olfr1491 | 0 | 1 | 0.113855  | 0         | 0         | No change |
| NM_146346 | Olfr397  | 0 | 1 | 0.113855  | 0         | 0         | No change |
| NM_146347 | Olfr390  | 0 | 1 | 0.113855  | 0         | 0         | No change |
| NM_146348 | Olfr1121 | 0 | 1 | 0.113855  | 0         | 0         | No change |
| NM_146349 | Olfr1128 | 0 | 1 | 0.113855  | 0         | 0         | No change |
| NM_146350 | Olfr1123 | 0 | 1 | 0.113855  | 0         | 0         | No change |
| NM_146351 | Olfr1133 | 0 | 1 | 0.113855  | 0         | 0         | No change |



|           |          |   |   |           |           |           |           |
|-----------|----------|---|---|-----------|-----------|-----------|-----------|
| NM_146353 | Olfr706  | 0 | 1 | 0.113855  | 0         | 0         | No change |
| NM_146354 | Olfr633  | 0 | 1 | 0.113855  | 0         | 0         | No change |
| NM_146355 | Olfr692  | 0 | 1 | -0.886145 | 0.351985  | 0.145032  | No change |
| NM_146356 | Olfr521  | 0 | 1 | 0.113855  | 0.0721459 | 0.0743178 | No change |
| NM_146357 | Olfr168  | 0 | 1 | 0.113855  | 0         | 0         | No change |
| NM_146358 | Olfr677  | 0 | 1 | 0.113855  | 0         | 0         | No change |
| NM_146359 | Olfr564  | 0 | 1 | 0.113855  | 0         | 0         | No change |
| NM_146360 | Olfr574  | 0 | 1 | 0.113855  | 0         | 0         | No change |
| NM_146361 | Olfr557  | 0 | 1 | 0.113855  | 0         | 0         | No change |
| NM_146362 | Olfr1312 | 0 | 1 | 0.113855  | 0         | 0         | No change |
| NM_146363 | Olfr731  | 0 | 1 | -2.20807  | 0.284171  | 0         | No change |
| NM_146364 | Olfr495  | 0 | 1 | 0.113855  | 0         | 0         | No change |
| NM_146365 | Olfr1094 | 0 | 1 | 0.113855  | 0         | 0         | No change |
| NM_146366 | Olfr1093 | 0 | 1 | 0.113855  | 0         | 0         | No change |
| NM_146367 | Olfr976  | 0 | 1 | -3.20807  | 0.222978  | 0         | No change |
| NM_146368 | Olfr361  | 0 | 1 | -3.20807  | 0.647303  | 0         | No change |
| NM_146369 | Olfr434  | 0 | 1 | 0.113855  | 0         | 0         | No change |
| NM_146370 | Olfr47   | 0 | 1 | 1.11385   | 0         | 0.0743178 | No change |
| NM_146371 | Olfr1450 | 0 | 1 | 0.113855  | 0         | 0         | No change |
| NM_146372 | Olfr509  | 0 | 1 | 0.113855  | 0         | 0         | No change |
| NM_146373 | Olfr1253 | 0 | 1 | 0.113855  | 0         | 0         | No change |
| NM_146374 | Olfr368  | 0 | 1 | -1.47111  | 0.141652  | 0         | No change |
| NM_146375 | Olfr918  | 0 | 1 | 0.113855  | 0         | 0         | No change |
| NM_146376 | Olfr323  | 0 | 1 | 0.113855  | 0         | 0         | No change |
| NM_146378 | Olfr794  | 0 | 1 | 0.113855  | 0         | 0         | No change |
| NM_146379 | Olfr654  | 0 | 1 | -0.208073 | 0.271707  | 0.209915  | No change |
| NM_146380 | Olfr593  | 0 | 1 | -0.886145 | 0.0708262 | 0         | No change |
| NM_146381 | Olfr1284 | 0 | 1 | -0.886145 | 0.0744583 | 0         | No change |
| NM_146382 | Olfr461  | 0 | 1 | 0.113855  | 0.147968  | 0.152422  | No change |
| NM_146383 | Olfr460  | 0 | 1 | 0.113855  | 0         | 0         | No change |
| NM_146384 | Olfr208  | 0 | 1 | 0.113855  | 0         | 0         | No change |
| NM_146385 | Olfr1347 | 0 | 1 | -0.301183 | 0.21779   | 0.149565  | No change |
| NM_146386 | Myocd    | 0 | 1 | 0.68322   | 0.420343  | 0.649496  | No change |
| NM_146389 | Olfr1350 | 0 | 1 | 0.113855  | 0.0751812 | 0.0774444 | No change |
| NM_146390 | Olfr1323 | 0 | 1 | -1.88615  | 0.224816  | 0         | No change |
| NM_146391 | Olfr1058 | 0 | 1 | 0.113855  | 0         | 0         | No change |
| NM_146392 | Olfr720  | 0 | 1 | 0.113855  | 0         | 0         | No change |
| NM_146394 | Olfr1278 | 0 | 1 | -3.05607  | 0.591872  | 0         | No change |
| NM_146395 | Olfr1276 | 0 | 1 | -2.20807  | 0.296882  | 0         | No change |
| NM_146396 | Olfr1277 | 0 | 1 | -1.47111  | 0.152835  | 0         | No change |
| NM_146397 | Olfr190  | 0 | 1 | -2.20807  | 0.301701  | 0         | No change |
| NM_146398 | Olfr1325 | 0 | 1 | 0.113855  | 0         | 0         | No change |
| NM_146399 | Olfr1328 | 0 | 1 | -0.886145 | 0.073984  | 0         | No change |
| NM_146400 | Olfr1288 | 0 | 1 | 0.113855  | 0         | 0         | No change |
| NM_146401 | Olfr1305 | 0 | 1 | 0.113855  | 0         | 0         | No change |
| NM_146402 | Olfr1303 | 0 | 1 | 0.113855  | 0         | 0         | No change |
| NM_146403 | Olfr1295 | 0 | 1 | 0.113855  | 0         | 0         | No change |
| NM_146404 | Olfr1289 | 0 | 1 | 0.113855  | 0         | 0         | No change |
| NM_146405 | Olfr228  | 0 | 1 | 0.113855  | 0         | 0         | No change |
| NM_146406 | Olfr1076 | 0 | 1 | 0.113855  | 0         | 0         | No change |
| NM_146407 | Olfr1079 | 0 | 1 | -1.47111  | 0.147032  | 0         | No change |
| NM_146408 | Olfr1065 | 0 | 1 | 0.113855  | 0         | 0         | No change |
| NM_146409 | Olfr1080 | 0 | 1 | 0.113855  | 0         | 0         | No change |
| NM_146410 | Olfr1420 | 0 | 1 | 0.3065    | 0.449632  | 0.540362  | No change |
| NM_146411 | Olfr462  | 0 | 1 | 0.113855  | 0         | 0         | No change |
| NM_146412 | Olfr464  | 0 | 1 | 0.113855  | 0         | 0         | No change |
| NM_146413 | Olfr463  | 0 | 1 | 0.113855  | 0         | 0         | No change |
| NM_146414 | Olfr1431 | 0 | 1 | -0.886145 | 0.0742204 | 0         | No change |
| NM_146415 | Olfr291  | 0 | 1 | 0.113855  | 0         | 0         | No change |
| NM_146416 | Olfr290  | 0 | 1 | 0.113855  | 0         | 0         | No change |
| NM_146417 | Olfr877  | 0 | 1 | 0.113855  | 0         | 0         | No change |
| NM_146418 | Olfr881  | 0 | 1 | 0.113855  | 0         | 0         | No change |
| NM_146419 | Olfr883  | 0 | 1 | 0.113855  | 0         | 0         | No change |
| NM_146420 | Olfr738  | 0 | 1 | 0.113855  | 0         | 0         | No change |
| NM_146423 | Olfr887  | 0 | 1 | 0.113855  | 0         | 0         | No change |
| NM_146424 | Olfr888  | 0 | 1 | 0.113855  | 0         | 0         | No change |
| NM_146425 | Olfr470  | 0 | 1 | 1.11385   | 0         | 0.0759693 | No change |
| NM_146426 | Olfr469  | 0 | 1 | 0.85082   | 0.147498  | 0.303877  | No change |
| NM_146429 | Olfr223  | 0 | 1 | 0.113855  | 0         | 0         | No change |
| NM_146430 | Olfr742  | 0 | 1 | 0.113855  | 0         | 0         | No change |
| NM_146431 | Olfr1510 | 0 | 1 | 0.113855  | 0         | 0         | No change |
| NM_146432 | Olfr1512 | 0 | 1 | -1.47111  | 0.147968  | 0         | No change |
| NM_146433 | Olfr994  | 0 | 1 | 0.113855  | 0         | 0         | No change |
| NM_146434 | Olfr995  | 0 | 1 | 0.113855  | 0         | 0         | No change |
| NM_146435 | Olfr993  | 0 | 1 | -0.886145 | 0.0737491 | 0         | No change |
| NM_146436 | Olfr998  | 0 | 1 | 0.113855  | 0         | 0         | No change |

|           |          |   |   |           |           |           |           |
|-----------|----------|---|---|-----------|-----------|-----------|-----------|
| NM_146437 | Olfr996  | 0 | 1 | 1.11385   | 0         | 0.06722   | No change |
| NM_146438 | Olfr938  | 0 | 1 | 0.113855  | 0         | 0         | No change |
| NM_146439 | Olfr937  | 0 | 1 | 0.113855  | 0         | 0         | No change |
| NM_146440 | Olfr919  | 0 | 1 | 0.113855  | 0         | 0         | No change |
| NM_146441 | Olfr933  | 0 | 1 | -0.886145 | 0.0751812 | 0         | No change |
| NM_146442 | Olfr934  | 0 | 1 | 0.113855  | 0         | 0         | No change |
| NM_146443 | Olfr382  | 0 | 1 | 0.113855  | 0         | 0         | No change |
| NM_146444 | Olfr458  | 0 | 1 | 1.11385   | 0         | 0.0762112 | No change |
| NM_146445 | Olfr450  | 0 | 1 | 0.113855  | 0         | 0         | No change |
| NM_146446 | Olfr215  | 0 | 1 | -2.47111  | 0.373488  | 0         | No change |
| NM_146447 | Olfr1309 | 0 | 1 | 0.113855  | 0         | 0         | No change |
| NM_146448 | Olfr1317 | 0 | 1 | -0.471108 | 0.146568  | 0.07549   | No change |
| NM_146449 | Olfr1310 | 0 | 1 | 0.113855  | 0         | 0         | No change |
| NM_146450 | Olfr1314 | 0 | 1 | 0.113855  | 0         | 0         | No change |
| NM_146451 | Olfr164  | 0 | 1 | 0.113855  | 0         | 0         | No change |
| NM_146452 | Olfr694  | 0 | 1 | 0.113855  | 0         | 0         | No change |
| NM_146453 | Olfr693  | 0 | 1 | 0.113855  | 0         | 0         | No change |
| NM_146454 | Olfr1231 | 0 | 1 | 0.113855  | 0         | 0         | No change |
| NM_146455 | Olfr1241 | 0 | 1 | 0.113855  | 0         | 0         | No change |
| NM_146456 | Olfr92   | 0 | 1 | 0.113855  | 0         | 0         | No change |
| NM_146457 | Olfr282  | 0 | 1 | 0.113855  | 0         | 0         | No change |
| NM_146458 | Olfr1199 | 0 | 1 | 0.113855  | 0         | 0         | No change |
| NM_146459 | Olfr1215 | 0 | 1 | 0.113855  | 0         | 0         | No change |
| NM_146461 | Olfr1209 | 0 | 1 | 0.113855  | 0         | 0         | No change |
| NM_146462 | Olfr1202 | 0 | 1 | 0.113855  | 0         | 0         | No change |
| NM_146463 | Olfr1204 | 0 | 1 | 0.113855  | 0         | 0         | No change |
| NM_146464 | Olfr1196 | 0 | 1 | -0.886145 | 0.0737491 | 0         | No change |
| NM_146465 | Olfr108  | 0 | 1 | 0.113855  | 0         | 0         | No change |
| NM_146466 | Olfr165  | 0 | 1 | 1.11385   | 0         | 0.0762112 | No change |
| NM_146467 | Olfr1388 | 0 | 1 | 0.113855  | 0         | 0         | No change |
| NM_146468 | Olfr1391 | 0 | 1 | 0.113855  | 0         | 0         | No change |
| NM_146469 | Olfr1381 | 0 | 1 | 0.113855  | 0         | 0         | No change |
| NM_146470 | Olfr1392 | 0 | 1 | -1.47111  | 0.135854  | 0         | No change |
| NM_146471 | Olfr1393 | 0 | 1 | -1.76061  | 0.744583  | 0.1534    | No change |
| NM_146472 | Olfr1384 | 0 | 1 | 0.113855  | 0         | 0         | No change |
| NM_146473 | Olfr1387 | 0 | 1 | 0.113855  | 0         | 0         | No change |
| NM_146474 | Olfr1261 | 0 | 1 | 0.113855  | 0         | 0         | No change |
| NM_146476 | Olfr1254 | 0 | 1 | 0.113855  | 0         | 0         | No change |
| NM_146477 | Olfr90   | 0 | 1 | 0.113855  | 0         | 0         | No change |
| NM_146478 | Olfr891  | 0 | 1 | 0.113855  | 0         | 0         | No change |
| NM_146479 | Olfr899  | 0 | 1 | 0.113855  | 0         | 0         | No change |
| NM_146481 | Olfr890  | 0 | 1 | 0.113855  | 0         | 0         | No change |
| NM_146482 | Olfr889  | 0 | 1 | 0.113855  | 0         | 0         | No change |
| NM_146484 | Olfr197  | 0 | 1 | -0.886145 | 0.0752624 | 0         | No change |
| NM_146485 | Olfr183  | 0 | 1 | -2.20807  | 0.233087  | 0         | No change |
| NM_146486 | Olfr203  | 0 | 1 | -1.47111  | 0.151342  | 0         | No change |
| NM_146487 | Olfr130  | 0 | 1 | 1.11385   | 0         | 0.0752526 | No change |
| NM_146488 | Olfr137  | 0 | 1 | 0.113855  | 0         | 0         | No change |
| NM_146489 | Olfr266  | 0 | 1 | 0.113855  | 0         | 0         | No change |
| NM_146490 | Olfr1411 | 0 | 1 | 0.113855  | 0         | 0         | No change |
| NM_146491 | Olfr1410 | 0 | 1 | -0.886145 | 0.0719225 | 0         | No change |
| NM_146492 | Olfr724  | 0 | 1 | -1.88615  | 0.207832  | 0         | No change |
| NM_146493 | Olfr730  | 0 | 1 | 0.113855  | 0         | 0         | No change |
| NM_146494 | Olfr722  | 0 | 1 | -1.47111  | 0.0881074 | 0         | No change |
| NM_146495 | Olfr474  | 0 | 1 | 0.113855  | 0         | 0         | No change |
| NM_146496 | Olfr486  | 0 | 1 | 0.113855  | 0         | 0         | No change |
| NM_146497 | Olfr492  | 0 | 1 | 0.113855  | 0         | 0         | No change |
| NM_146498 | Olfr490  | 0 | 1 | 0.113855  | 0         | 0         | No change |
| NM_146499 | Olfr484  | 0 | 1 | 0.113855  | 0         | 0         | No change |
| NM_146500 | Olfr319  | 0 | 1 | 0.113855  | 0         | 0         | No change |
| NM_146501 | Olfr318  | 0 | 1 | -0.886145 | 0.0679268 | 0         | No change |
| NM_146502 | Olfr328  | 0 | 1 | -1.47111  | 0.149395  | 0         | No change |
| NM_146503 | Olfr952  | 0 | 1 | -0.886145 | 0.0737491 | 0         | No change |
| NM_146504 | Olfr961  | 0 | 1 | 0.113855  | 0         | 0         | No change |
| NM_146505 | Olfr148  | 0 | 1 | 0.113855  | 0         | 0         | No change |
| NM_146506 | Olfr945  | 0 | 1 | 0.113855  | 0         | 0         | No change |
| NM_146507 | Olfr944  | 0 | 1 | 0.113855  | 0         | 0         | No change |
| NM_146508 | Olfr959  | 0 | 1 | 0.113855  | 0         | 0         | No change |
| NM_146510 | Olfr98   | 0 | 1 | -0.886145 | 0.0749386 | 0         | No change |
| NM_146511 | Olfr107  | 0 | 1 | 0.113855  | 0         | 0         | No change |
| NM_146512 | Olfr97   | 0 | 1 | -0.886145 | 0.0746977 | 0         | No change |
| NM_146513 | Olfr95   | 0 | 1 | 0.113855  | 0         | 0         | No change |
| NM_146514 | Olfr96   | 0 | 1 | 1.11385   | 0         | 0.0762112 | No change |
| NM_146515 | Olfr99   | 0 | 1 | 0.85082   | 0.151836  | 0.312815  | No change |
| NM_146518 | Olfr523  | 0 | 1 | 0.113855  | 0         | 0         | No change |
| NM_146519 | Olfr530  | 0 | 1 | 0.113855  | 0         | 0         | No change |

|           |          |   |   |           |           |           |           |
|-----------|----------|---|---|-----------|-----------|-----------|-----------|
| NM_146520 | Olfr536  | 0 | 1 | 0.113855  | 0.018088  | 0.0186325 | No change |
| NM_146522 | Olfr854  | 0 | 1 | 0.113855  | 0         | 0         | No change |
| NM_146523 | Olfr850  | 0 | 1 | 0.113855  | 0         | 0         | No change |
| NM_146524 | Olfr855  | 0 | 1 | 0.113855  | 0         | 0         | No change |
| NM_146525 | Olfr847  | 0 | 1 | 0.113855  | 0         | 0         | No change |
| NM_146526 | Olfr859  | 0 | 1 | 0.113855  | 0         | 0         | No change |
| NM_146527 | Olfr849  | 0 | 1 | 0.113855  | 0         | 0         | No change |
| NM_146528 | Olfr860  | 0 | 1 | -2.20807  | 0.228689  | 0         | No change |
| NM_146529 | Olfr1183 | 0 | 1 | 0.113855  | 0         | 0         | No change |
| NM_146530 | Olfr1186 | 0 | 1 | 0.113855  | 0         | 0         | No change |
| NM_146531 | Olfr1168 | 0 | 1 | 0.113855  | 0         | 0         | No change |
| NM_146532 | Olfr1170 | 0 | 1 | 0.113855  | 0         | 0         | No change |
| NM_146533 | Olfr1367 | 0 | 1 | 0.113855  | 0         | 0         | No change |
| NM_146534 | Olfr1368 | 0 | 1 | -0.886145 | 0.0737491 | 0         | No change |
| NM_146535 | Olfr1370 | 0 | 1 | 0.113855  | 0         | 0         | No change |
| NM_146536 | Olfr313  | 0 | 1 | 0.113855  | 0         | 0         | No change |
| NM_146537 | Olfr311  | 0 | 1 | 0.113855  | 0         | 0         | No change |
| NM_146538 | Olfr315  | 0 | 1 | -2.88615  | 0.488828  | 0         | No change |
| NM_146539 | Olfr373  | 0 | 1 | -0.471108 | 0.147498  | 0.0759693 | No change |
| NM_146540 | Olfr1364 | 0 | 1 | 0.113855  | 0         | 0         | No change |
| NM_146541 | Olfr1361 | 0 | 1 | 0.113855  | 0         | 0         | No change |
| NM_146542 | Olfr11   | 0 | 1 | 0.113855  | 0         | 0         | No change |
| NM_146543 | Olfr1360 | 0 | 1 | 0.113855  | 0         | 0         | No change |
| NM_146544 | Olfr777  | 0 | 1 | 0.113855  | 0         | 0         | No change |
| NM_146545 | Olfr775  | 0 | 1 | 0.113855  | 0         | 0         | No change |
| NM_146547 | Olfr771  | 0 | 1 | 0.113855  | 0         | 0         | No change |
| NM_146548 | Olfr800  | 0 | 1 | 0.113855  | 0         | 0         | No change |
| NM_146549 | Olfr786  | 0 | 1 | 0.113855  | 0         | 0         | No change |
| NM_146550 | Olfr810  | 0 | 1 | 0.113855  | 0         | 0         | No change |
| NM_146551 | Olfr788  | 0 | 1 | -1.88615  | 0.223375  | 0         | No change |
| NM_146552 | Olfr811  | 0 | 1 | 0.113855  | 0         | 0         | No change |
| NM_146553 | Olfr806  | 0 | 1 | 0.113855  | 0         | 0         | No change |
| NM_146554 | Olfr803  | 0 | 1 | 0.113855  | 0         | 0         | No change |
| NM_146555 | Olfr805  | 0 | 1 | 0.113855  | 0         | 0         | No change |
| NM_146556 | Olfr798  | 0 | 1 | 0.113855  | 0         | 0         | No change |
| NM_146557 | Olfr869  | 0 | 1 | 0.113855  | 0         | 0         | No change |
| NM_146558 | Olfr866  | 0 | 1 | 0.113855  | 0         | 0         | No change |
| NM_146559 | Olfr868  | 0 | 1 | 0.113855  | 0         | 0         | No change |
| NM_146560 | Olfr872  | 0 | 1 | -2.47111  | 0.310022  | 0         | No change |
| NM_146561 | Olfr873  | 0 | 1 | -2.20807  | 0.290387  | 0         | No change |
| NM_146562 | Olfr862  | 0 | 1 | 0.113855  | 0         | 0         | No change |
| NM_146563 | Olfr18   | 0 | 1 | -1.47111  | 0.120576  | 0         | No change |
| NM_146564 | Olfr836  | 0 | 1 | -0.886145 | 0.0729769 | 0         | No change |
| NM_146565 | Olfr837  | 0 | 1 | 0.113855  | 0         | 0         | No change |
| NM_146566 | Olfr830  | 0 | 1 | 0.113855  | 0         | 0         | No change |
| NM_146567 | Olfr843  | 0 | 1 | 0.113855  | 0         | 0         | No change |
| NM_146568 | Olfr1012 | 0 | 1 | 0.113855  | 0         | 0         | No change |
| NM_146569 | Olfr1014 | 0 | 1 | 0.113855  | 0         | 0         | No change |
| NM_146570 | Olfr1006 | 0 | 1 | 0.113855  | 0         | 0         | No change |
| NM_146571 | Olfr1015 | 0 | 1 | 0.113855  | 0         | 0         | No change |
| NM_146572 | Olfr1009 | 0 | 1 | 0.113855  | 0         | 0         | No change |
| NM_146573 | Olfr1002 | 0 | 1 | 0.113855  | 0         | 0         | No change |
| NM_146575 | Olfr1457 | 0 | 1 | 0.113855  | 0         | 0         | No change |
| NM_146576 | Olfr459  | 0 | 1 | 0.113855  | 0         | 0         | No change |
| NM_146577 | Olfr1043 | 0 | 1 | 0.113855  | 0         | 0         | No change |
| NM_146578 | Olfr1033 | 0 | 1 | 0.354863  | 0.80064   | 0.978183  | No change |
| NM_146579 | Olfr1032 | 0 | 1 | 0.113855  | 0         | 0         | No change |
| NM_146580 | Olfr1020 | 0 | 1 | 0.113855  | 0         | 0         | No change |
| NM_146582 | Olfr1046 | 0 | 1 | 0.113855  | 0         | 0         | No change |
| NM_146583 | Olfr52   | 0 | 1 | 0.113855  | 0         | 0         | No change |
| NM_146584 | Olfr1026 | 0 | 1 | 0.113855  | 0         | 0         | No change |
| NM_146586 | Olfr1018 | 0 | 1 | 0.113855  | 0         | 0         | No change |
| NM_146587 | Olfr1023 | 0 | 1 | 0.113855  | 0         | 0         | No change |
| NM_146588 | Olfr1030 | 0 | 1 | 0.113855  | 0         | 0         | No change |
| NM_146589 | Olfr1022 | 0 | 1 | 0.113855  | 0         | 0         | No change |
| NM_146590 | Olfr1085 | 0 | 1 | 0.113855  | 0         | 0         | No change |
| NM_146591 | Olfr1101 | 0 | 1 | 0.113855  | 0         | 0         | No change |
| NM_146592 | Olfr1086 | 0 | 1 | 0.113855  | 0         | 0         | No change |
| NM_146593 | Olfr1111 | 0 | 1 | 0.113855  | 0         | 0         | No change |
| NM_146594 | Olfr1100 | 0 | 1 | 0.113855  | 0         | 0         | No change |
| NM_146596 | Olfr703  | 0 | 1 | 0.113855  | 0         | 0         | No change |
| NM_146597 | Olfr702  | 0 | 1 | -2.88615  | 0.361907  | 0         | No change |
| NM_146598 | Olfr695  | 0 | 1 | -0.886145 | 0.0580291 | 0         | No change |
| NM_146599 | Olfr697  | 0 | 1 | -0.886145 | 0.0664375 | 0         | No change |
| NM_146600 | Olfr700  | 0 | 1 | -0.886145 | 0.0732838 | 0         | No change |
| NM_146601 | Olfr710  | 0 | 1 | 0.113855  | 0         | 0         | No change |

|           |             |   |   |           |           |           |           |
|-----------|-------------|---|---|-----------|-----------|-----------|-----------|
| NM_146602 | Olfr698     | 0 | 1 | 1.11385   | 0         | 0.0766998 | No change |
| NM_146604 | Olfr716     | 0 | 1 | 0.113855  | 0         | 0         | No change |
| NM_146605 | Olfr828     | 0 | 1 | 0.113855  | 0         | 0         | No change |
| NM_146606 | Olfr24      | 0 | 1 | -2.20807  | 0.295936  | 0         | No change |
| NM_146607 | Olfr270     | 0 | 1 | 0.113855  | 0.148441  | 0.152909  | No change |
| NM_146608 | Olfr984     | 0 | 1 | 1.11385   | 0         | 0.0759693 | No change |
| NM_146609 | Olfr150     | 0 | 1 | 0.113855  | 0         | 0         | No change |
| NM_146610 | Olfr972     | 0 | 1 | 0.113855  | 0         | 0         | No change |
| NM_146611 | Olfr970     | 0 | 1 | 0.113855  | 0         | 0         | No change |
| NM_146612 | Olfr968     | 0 | 1 | 0.113855  | 0         | 0         | No change |
| NM_146613 | Olfr229     | 0 | 1 | 0.113855  | 0         | 0         | No change |
| NM_146614 | Olfr971     | 0 | 1 | 0.113855  | 0         | 0         | No change |
| NM_146615 | Olfr986     | 0 | 1 | -0.471108 | 0.137191  | 0.0706604 | No change |
| NM_146616 | Olfr305     | 0 | 1 | -0.886145 | 0.0725968 | 0         | No change |
| NM_146617 | Olfr307     | 0 | 1 | -1.47111  | 0.147968  | 0         | No change |
| NM_146618 | Olfr297     | 0 | 1 | 0.113855  | 0         | 0         | No change |
| NM_146619 | Olfr303     | 0 | 1 | -2.88615  | 0.508178  | 0         | No change |
| NM_146620 | Olfr292     | 0 | 1 | 0.113855  | 0         | 0         | No change |
| NM_146621 | Olfr308     | 0 | 1 | -0.886145 | 0.0751812 | 0         | No change |
| NM_146622 | Olfr360     | 0 | 1 | -2.6935   | 0.43832   | 0         | No change |
| NM_146623 | Olfr357     | 0 | 1 | -0.886145 | 0.0751812 | 0         | No change |
| NM_146624 | Olfr356     | 0 | 1 | 0.113855  | 0         | 0         | No change |
| NM_146625 | Olfr355     | 0 | 1 | 0.113855  | 0         | 0         | No change |
| NM_146627 | Olfr350     | 0 | 1 | 0.113855  | 0         | 0         | No change |
| NM_146628 | Olfr344     | 0 | 1 | 0.113855  | 0         | 0         | No change |
| NM_146629 | Olfr121     | 0 | 1 | 0.113855  | 0         | 0         | No change |
| NM_146630 | Olfr123     | 0 | 1 | -0.886145 | 0.0749386 | 0         | No change |
| NM_146631 | Olfr120     | 0 | 1 | 0.113855  | 0         | 0         | No change |
| NM_146632 | Olfr116     | 0 | 1 | -0.886145 | 0.0721459 | 0         | No change |
| NM_146633 | Olfr1501    | 0 | 1 | 0.113855  | 0         | 0         | No change |
| NM_146634 | Olfr1504    | 0 | 1 | -0.886145 | 0.0735158 | 0         | No change |
| NM_146635 | Olfr1489    | 0 | 1 | 0.113855  | 0         | 0         | No change |
| NM_146636 | Olfr1487    | 0 | 1 | 0.113855  | 0         | 0         | No change |
| NM_146637 | Olfr1141    | 0 | 1 | 0.113855  | 0         | 0         | No change |
| NM_146638 | Olfr1151    | 0 | 1 | 0.113855  | 0         | 0         | No change |
| NM_146639 | Olfr1138    | 0 | 1 | 0.113855  | 0         | 0         | No change |
| NM_146640 | Olfr1153    | 0 | 1 | 0.113855  | 0         | 0         | No change |
| NM_146641 | Olfr1164    | 0 | 1 | 0.113855  | 0         | 0         | No change |
| NM_146642 | Olfr1140    | 0 | 1 | 0.113855  | 0         | 0         | No change |
| NM_146643 | Olfr1155    | 0 | 1 | 0.113855  | 0         | 0         | No change |
| NM_146644 | Olfr1163    | 0 | 1 | 0.113855  | 0         | 0         | No change |
| NM_146645 | Olfr1158    | 0 | 1 | 0.113855  | 0         | 0         | No change |
| NM_146646 | Olfr152     | 0 | 1 | 0.113855  | 0         | 0         | No change |
| NM_146647 | Olfr1154    | 0 | 1 | -1.47111  | 0.149395  | 0         | No change |
| NM_146648 | Olfr1165-ps | 0 | 1 | 0.113855  | 0         | 0         | No change |
| NM_146649 | Olfr1160    | 0 | 1 | 0.113855  | 0         | 0         | No change |
| NM_146650 | Olfr1166    | 0 | 1 | 0.113855  | 0         | 0         | No change |
| NM_146651 | Olfr418-ps1 | 0 | 1 | 0.113855  | 0         | 0         | No change |
| NM_146652 | Olfr13      | 0 | 1 | -2.20807  | 0.298791  | 0         | No change |
| NM_146653 | Olfr435     | 0 | 1 | 0.113855  | 0         | 0         | No change |
| NM_146654 | Olfr237-ps1 | 0 | 1 | -0.886145 | 0.0746977 | 0         | No change |
| NM_146655 | Olfr441     | 0 | 1 | 0.113855  | 0         | 0         | No change |
| NM_146656 | Olfr444     | 0 | 1 | 0.113855  | 0         | 0         | No change |
| NM_146658 | Olfr1131    | 0 | 1 | 0.113855  | 0         | 0         | No change |
| NM_146659 | Olfr1136    | 0 | 1 | 0.113855  | 0         | 0         | No change |
| NM_146660 | Olfr1135    | 0 | 1 | 0.113855  | 0         | 0         | No change |
| NM_146661 | Olfr1112    | 0 | 1 | 0.113855  | 0         | 0         | No change |
| NM_146662 | Olfr365     | 0 | 1 | -2.20807  | 0.296882  | 0         | No change |
| NM_146664 | Olfr734     | 0 | 1 | -3.05607  | 0.591872  | 0         | No change |
| NM_146665 | Olfr732     | 0 | 1 | -2.6935   | 0.400534  | 0         | No change |
| NM_146666 | Olfr736     | 0 | 1 | -0.886145 | 0.0742204 | 0         | No change |
| NM_146667 | Olfr740     | 0 | 1 | -0.886145 | 0.0744583 | 0         | No change |
| NM_146668 | Olfr739     | 0 | 1 | 0.113855  | 0         | 0         | No change |
| NM_146670 | Olfr815     | 0 | 1 | 0.113855  | 0         | 0         | No change |
| NM_146671 | Olfr822     | 0 | 1 | 0.113855  | 0         | 0         | No change |
| NM_146672 | Olfr816     | 0 | 1 | 0.113855  | 0         | 0         | No change |
| NM_146673 | Olfr823     | 0 | 1 | 0.528892  | 0.147032  | 0.227187  | No change |
| NM_146674 | Olfr824     | 0 | 1 | -0.886145 | 0.220547  | 0.0757289 | No change |
| NM_146675 | Olfr820     | 0 | 1 | 0.113855  | 0         | 0         | No change |
| NM_146676 | Olfr826     | 0 | 1 | 0.113855  | 0         | 0         | No change |
| NM_146677 | Olfr825     | 0 | 1 | 0.113855  | 0         | 0         | No change |
| NM_146678 | Olfr1428    | 0 | 1 | 0.113855  | 0         | 0         | No change |
| NM_146679 | Olfr1427    | 0 | 1 | 0.113855  | 0.0744583 | 0.0766998 | No change |
| NM_146680 | Olfr1423    | 0 | 1 | 0.113855  | 0         | 0         | No change |
| NM_146681 | Olfr1424    | 0 | 1 | 1.69882   | 0         | 0.152422  | No change |
| NM_146682 | Olfr76      | 0 | 1 | 0.113855  | 0         | 0         | No change |

|           |          |   |   |           |           |           |             |
|-----------|----------|---|---|-----------|-----------|-----------|-------------|
| NM_146683 | Olfr1441 | 0 | 1 | 1.11385   | 0         | 0.0750167 | No change   |
| NM_146684 | Olfr1440 | 0 | 1 | 0.113855  | 0         |           | 0 No change |
| NM_146685 | Olfr1433 | 0 | 1 | 0.113855  | 0         |           | 0 No change |
| NM_146686 | Olfr235  | 0 | 1 | 0.113855  | 0         |           | 0 No change |
| NM_146687 | Olfr1436 | 0 | 1 | 0.113855  | 0         |           | 0 No change |
| NM_146688 | Olfr262  | 0 | 1 | -1.88615  | 0.222661  |           | 0 No change |
| NM_146689 | Olfr1459 | 0 | 1 | 0.113855  | 0         |           | 0 No change |
| NM_146690 | Olfr1472 | 0 | 1 | 0.113855  | 0         |           | 0 No change |
| NM_146691 | Olfr1467 | 0 | 1 | 0.113855  | 0         |           | 0 No change |
| NM_146692 | Olfr1454 | 0 | 1 | 0.113855  | 0         |           | 0 No change |
| NM_146693 | Olfr1462 | 0 | 1 | 0.113855  | 0         |           | 0 No change |
| NM_146694 | Olfr1466 | 0 | 1 | 0.113855  | 0         |           | 0 No change |
| NM_146695 | Olfr1469 | 0 | 1 | 0.113855  | 0         |           | 0 No change |
| NM_146696 | Olfr1477 | 0 | 1 | 0.113855  | 0         |           | 0 No change |
| NM_146697 | Olfr1442 | 0 | 1 | 0.113855  | 0         |           | 0 No change |
| NM_146698 | Olfr1443 | 0 | 1 | 0.113855  | 0         |           | 0 No change |
| NM_146700 | Olfr1453 | 0 | 1 | 0.113855  | 0         |           | 0 No change |
| NM_146701 | Olfr1448 | 0 | 1 | -0.886145 | 0.0737491 |           | 0 No change |
| NM_146702 | Olfr1444 | 0 | 1 | -2.88615  | 0.508178  |           | 0 No change |
| NM_146703 | Olfr1447 | 0 | 1 | 0.113855  | 0         |           | 0 No change |
| NM_146704 | Olfr1446 | 0 | 1 | -1.6935   | 0.451087  | 0.0774444 | No change   |
| NM_146705 | Olfr1451 | 0 | 1 | 0.113855  | 0         |           | 0 No change |
| NM_146706 | Olfr401  | 0 | 1 | 0.113855  | 0         |           | 0 No change |
| NM_146707 | Olfr410  | 0 | 1 | 0.113855  | 0         |           | 0 No change |
| NM_146708 | Olfr402  | 0 | 1 | -1.47111  | 0.147032  |           | 0 No change |
| NM_146709 | Olfr411  | 0 | 1 | -0.886145 | 0.0664375 |           | 0 No change |
| NM_146710 | Olfr398  | 0 | 1 | 0.113855  | 0         |           | 0 No change |
| NM_146711 | Olfr43   | 0 | 1 | 0.113855  | 0         |           | 0 No change |
| NM_146713 | Olfr1342 | 0 | 1 | 0.113855  | 0         |           | 0 No change |
| NM_146714 | Olfr248  | 0 | 1 | 0.113855  | 0         |           | 0 No change |
| NM_146715 | Olfr419  | 0 | 1 | 0.113855  | 0         |           | 0 No change |
| NM_146716 | Olfr432  | 0 | 1 | 0.113855  | 0         |           | 0 No change |
| NM_146717 | Olfr433  | 0 | 1 | 1.11385   | 0         | 0.071505  | No change   |
| NM_146718 | Olfr430  | 0 | 1 | 0.113855  | 0         |           | 0 No change |
| NM_146720 | Olfr421  | 0 | 1 | -1.88615  | 0.199123  |           | 0 No change |
| NM_146721 | Olfr424  | 0 | 1 | -0.886145 | 0.0735158 |           | 0 No change |
| NM_146722 | Olfr429  | 0 | 1 | 0.113855  | 0         |           | 0 No change |
| NM_146723 | Olfr513  | 0 | 1 | 0.113855  | 0         |           | 0 No change |
| NM_146724 | Olfr512  | 0 | 1 | 0.113855  | 0         |           | 0 No change |
| NM_146725 | Olfr516  | 0 | 1 | -0.886145 | 0.0737491 |           | 0 No change |
| NM_146726 | Olfr514  | 0 | 1 | 0.113855  | 0         |           | 0 No change |
| NM_146727 | Olfr611  | 0 | 1 | 0.113855  | 0         |           | 0 No change |
| NM_146728 | Olfr781  | 0 | 1 | -0.886145 | 0.0744583 |           | 0 No change |
| NM_146729 | Olfr784  | 0 | 1 | 0.113855  | 0         |           | 0 No change |
| NM_146730 | Olfr1095 | 0 | 1 | 0.113855  | 0         |           | 0 No change |
| NM_146731 | Olfr599  | 0 | 1 | 0.113855  | 0         |           | 0 No change |
| NM_146732 | Olfr488  | 0 | 1 | 0.113855  | 0         |           | 0 No change |
| NM_146733 | Olfr482  | 0 | 1 | 0.113855  | 0         |           | 0 No change |
| NM_146734 | Olfr478  | 0 | 1 | 0.113855  | 0         |           | 0 No change |
| NM_146735 | Olfr483  | 0 | 1 | 0.113855  | 0         |           | 0 No change |
| NM_146736 | Olfr491  | 0 | 1 | 0.113855  | 0         |           | 0 No change |
| NM_146737 | Olfr494  | 0 | 1 | 0.113855  | 0         |           | 0 No change |
| NM_146738 | Olfr497  | 0 | 1 | 0.113855  | 0         |           | 0 No change |
| NM_146739 | Olfr502  | 0 | 1 | 0.113855  | 0         |           | 0 No change |
| NM_146741 | Olfr1497 | 0 | 1 | -1.47111  | 0.147498  |           | 0 No change |
| NM_146742 | Olfr1316 | 0 | 1 | 0.113855  | 0         |           | 0 No change |
| NM_146743 | Olfr507  | 0 | 1 | 0.113855  | 0         |           | 0 No change |
| NM_146744 | Olfr1362 | 0 | 1 | 0.113855  | 0         |           | 0 No change |
| NM_146745 | Olfr957  | 0 | 1 | 0.113855  | 0         |           | 0 No change |
| NM_146746 | Olfr935  | 0 | 1 | 0.113855  | 0         |           | 0 No change |
| NM_146747 | Olfr146  | 0 | 1 | 0.113855  | 0         |           | 0 No change |
| NM_146748 | Olfr661  | 0 | 1 | 0.113855  | 0         |           | 0 No change |
| NM_146749 | Olfr875  | 0 | 1 | -0.886145 | 0.0694153 |           | 0 No change |
| NM_146750 | Olfr689  | 0 | 1 | -0.886145 | 0.0723707 |           | 0 No change |
| NM_146751 | Olfr648  | 0 | 1 | -0.886145 | 0.0732838 |           | 0 No change |
| NM_146752 | Olfr1106 | 0 | 1 | 0.113855  | 0         |           | 0 No change |
| NM_146753 | Olfr1195 | 0 | 1 | 0.113855  | 0         |           | 0 No change |
| NM_146754 | Olfr556  | 0 | 1 | 1.11385   | 0         | 0.0701769 | No change   |
| NM_146755 | Olfr551  | 0 | 1 | 0.113855  | 0         |           | 0 No change |
| NM_146756 | Olfr608  | 0 | 1 | 0.113855  | 0         |           | 0 No change |
| NM_146757 | Olfr583  | 0 | 1 | 0.113855  | 0         |           | 0 No change |
| NM_146758 | Olfr678  | 0 | 1 | 0.113855  | 0         |           | 0 No change |
| NM_146759 | Olfr214  | 0 | 1 | 0.113855  | 0         |           | 0 No change |
| NM_146760 | Olfr672  | 0 | 1 | 0.113855  | 0         |           | 0 No change |
| NM_146761 | Olfr414  | 0 | 1 | 0.113855  | 0         |           | 0 No change |
| NM_146762 | Olfr1013 | 0 | 1 | 0.113855  | 0         |           | 0 No change |

|           |          |   |   |           |           |           |           |
|-----------|----------|---|---|-----------|-----------|-----------|-----------|
| NM_146763 | Olfr1406 | 0 | 1 | 0.113855  | 0         | 0         | No change |
| NM_146764 | Olfr1408 | 0 | 1 | 0.113855  | 0         | 0         | No change |
| NM_146766 | Olfr1109 | 0 | 1 | 0.113855  | 0         | 0         | No change |
| NM_146767 | Olfr1104 | 0 | 1 | 0.113855  | 0         | 0         | No change |
| NM_146768 | Olfr1099 | 0 | 1 | 0.113855  | 0         | 0         | No change |
| NM_146769 | Olfr1110 | 0 | 1 | 0.113855  | 0         | 0         | No change |
| NM_146770 | Olfr259  | 0 | 1 | 0.113855  | 0         | 0         | No change |
| NM_146771 | Olfr1176 | 0 | 1 | 0.113855  | 0         | 0         | No change |
| NM_146772 | Olfr1189 | 0 | 1 | 0.113855  | 0         | 0         | No change |
| NM_146773 | Olfr508  | 0 | 1 | 0.113855  | 0         | 0         | No change |
| NM_146774 | Olfr472  | 0 | 1 | -0.886145 | 0.0746977 | 0         | No change |
| NM_146775 | Olfr473  | 0 | 1 | 0.113855  | 0         | 0         | No change |
| NM_146776 | Olfr821  | 0 | 1 | 0.113855  | 0         | 0         | No change |
| NM_146777 | Olfr818  | 0 | 1 | 0.113855  | 0         | 0         | No change |
| NM_146778 | Olfr1208 | 0 | 1 | 0.113855  | 0         | 0         | No change |
| NM_146779 | Olfr196  | 0 | 1 | 0.113855  | 0         | 0         | No change |
| NM_146780 | Olfr715  | 0 | 1 | 0.113855  | 0         | 0         | No change |
| NM_146781 | Olfr922  | 0 | 1 | -1.88615  | 0.184699  | 0         | No change |
| NM_146782 | Olfr921  | 0 | 1 | 0.113855  | 0         | 0         | No change |
| NM_146783 | Olfr26   | 0 | 1 | 0.113855  | 0         | 0         | No change |
| NM_146784 | Olfr916  | 0 | 1 | 0.113855  | 0         | 0         | No change |
| NM_146785 | Olfr915  | 0 | 1 | 0.113855  | 0         | 0         | No change |
| NM_146786 | Olfr914  | 0 | 1 | 0.113855  | 0         | 0         | No change |
| NM_146787 | Olfr920  | 0 | 1 | 0.492366  | 0.320019  | 0.439537  | No change |
| NM_146788 | Olfr1245 | 0 | 1 | 0.113855  | 0         | 0         | No change |
| NM_146789 | Olfr1230 | 0 | 1 | 0.113855  | 0         | 0         | No change |
| NM_146790 | Olfr1238 | 0 | 1 | 0.113855  | 0         | 0         | No change |
| NM_146791 | Olfr1248 | 0 | 1 | 0.113855  | 0         | 0         | No change |
| NM_146792 | Olfr1246 | 0 | 1 | 0.113855  | 0         | 0         | No change |
| NM_146793 | Olfr1271 | 0 | 1 | 0.113855  | 0         | 0         | No change |
| NM_146794 | Olfr1263 | 0 | 1 | 0.113855  | 0         | 0         | No change |
| NM_146795 | Olfr812  | 0 | 1 | 0.113855  | 0         | 0         | No change |
| NM_146796 | Olfr1499 | 0 | 1 | 0.113855  | 0         | 0         | No change |
| NM_146797 | Olfr1502 | 0 | 1 | 0.113855  | 0         | 0         | No change |
| NM_146798 | Olfr878  | 0 | 1 | 0.113855  | 0         | 0         | No change |
| NM_146801 | Olfr904  | 0 | 1 | 0.113855  | 0         | 0         | No change |
| NM_146802 | Olfr902  | 0 | 1 | 0.113855  | 0         | 0         | No change |
| NM_146803 | Olfr906  | 0 | 1 | -0.886145 | 0.0744583 | 0         | No change |
| NM_146804 | Olfr905  | 0 | 1 | 0.113855  | 0         | 0         | No change |
| NM_146805 | Olfr907  | 0 | 1 | 0.113855  | 0         | 0         | No change |
| NM_146806 | Olfr143  | 0 | 1 | 0.113855  | 0         | 0         | No change |
| NM_146807 | Olfr136  | 0 | 1 | 0.113855  | 0         | 0         | No change |
| NM_146808 | Olfr1240 | 0 | 1 | 0.113855  | 0         | 0         | No change |
| NM_146809 | Olfr1426 | 0 | 1 | 1.43578   | 0.0416575 | 0.171646  | No change |
| NM_146810 | Olfr912  | 0 | 1 | 0.113855  | 0         | 0         | No change |
| NM_146811 | Olfr910  | 0 | 1 | 0.113855  | 0         | 0         | No change |
| NM_146812 | Olfr620  | 0 | 1 | 0.113855  | 0         | 0         | No change |
| NM_146813 | Olfr651  | 0 | 1 | 0.113855  | 0         | 0         | No change |
| NM_146814 | Olfr665  | 0 | 1 | 1.11385   | 0         | 0.07549   | No change |
| NM_146815 | Olfr926  | 0 | 1 | -0.886145 | 0.0751812 | 0         | No change |
| NM_146816 | Olfr923  | 0 | 1 | 1.11385   | 0         | 0.06722   | No change |
| NM_146817 | Olfr1156 | 0 | 1 | 0.113855  | 0         | 0         | No change |
| NM_146818 | Olfr1218 | 0 | 1 | 0.113855  | 0         | 0         | No change |
| NM_146819 | Olfr466  | 0 | 1 | -0.886145 | 0.0751812 | 0         | No change |
| NM_146820 | Olfr655  | 0 | 1 | 0.113855  | 0.0751812 | 0.0774444 | No change |
| NM_146821 | Olfr629  | 0 | 1 | 0.113855  | 0         | 0         | No change |
| NM_146822 | Olfr640  | 0 | 1 | 0.113855  | 0         | 0         | No change |
| NM_146823 | Olfr1184 | 0 | 1 | 0.113855  | 0         | 0         | No change |
| NM_146824 | Olfr273  | 0 | 1 | -1.47111  | 0.146107  | 0         | No change |
| NM_146825 | Olfr39   | 0 | 1 | -2.88615  | 0.444308  | 0         | No change |
| NM_146826 | Olfr969  | 0 | 1 | 0.113855  | 0         | 0         | No change |
| NM_146827 | Olfr983  | 0 | 1 | 0.113855  | 0         | 0         | No change |
| NM_146828 | Olfr975  | 0 | 1 | -2.20807  | 0.298791  | 0         | No change |
| NM_146829 | Olfr27   | 0 | 1 | -1.47111  | 0.134154  | 0         | No change |
| NM_146830 | Olfr44   | 0 | 1 | 0.113855  | 0         | 0         | No change |
| NM_146831 | Olfr133  | 0 | 1 | 0.113855  | 0         | 0         | No change |
| NM_146832 | Olfr134  | 0 | 1 | 0.113855  | 0         | 0         | No change |
| NM_146833 | Olfr103  | 0 | 1 | 0.113855  | 0         | 0         | No change |
| NM_146834 | Olfr101  | 0 | 1 | 1.11385   | 0         | 0.0774444 | No change |
| NM_146835 | Olfr109  | 0 | 1 | 0.113855  | 0         | 0         | No change |
| NM_146836 | Olfr1132 | 0 | 1 | 0.113855  | 0         | 0         | No change |
| NM_146837 | Olfr1126 | 0 | 1 | 0.113855  | 0         | 0         | No change |
| NM_146838 | Olfr1130 | 0 | 1 | 0.113855  | 0         | 0         | No change |
| NM_146839 | Olfr272  | 0 | 1 | 1.69882   | 0.145194  | 0.598258  | No change |
| NM_146840 | Olfr545  | 0 | 1 | -2.47111  | 0.366419  | 0         | No change |
| NM_146841 | Olfr617  | 0 | 1 | 0.113855  | 0         | 0         | No change |

|           |             |   |   |           |           |           |           |
|-----------|-------------|---|---|-----------|-----------|-----------|-----------|
| NM_146843 | Olfr1097    | 0 | 1 | 0.113855  | 0         | 0         | No change |
| NM_146844 | Olfr1107    | 0 | 1 | 0.113855  | 0         | 0         | No change |
| NM_146845 | Olfr1098    | 0 | 1 | 0.113855  | 0         | 0         | No change |
| NM_146846 | Olfr1087    | 0 | 1 | 0.113855  | 0         | 0         | No change |
| NM_146847 | Olfr1090    | 0 | 1 | 0.113855  | 0         | 0         | No change |
| NM_146848 | Olfr1161    | 0 | 1 | 0.113855  | 0         | 0         | No change |
| NM_146849 | Olfr1157    | 0 | 1 | 0.113855  | 0         | 0         | No change |
| NM_146851 | Olfr295     | 0 | 1 | 0.113855  | 0         | 0         | No change |
| NM_146852 | Olfr1339    | 0 | 1 | -0.886145 | 0.0735158 | 0         | No change |
| NM_146853 | Olfr1341    | 0 | 1 | 0.113855  | 0.0742204 | 0.0764547 | No change |
| NM_146854 | Olfr982     | 0 | 1 | 0.113855  | 0         | 0         | No change |
| NM_146855 | Olfr985     | 0 | 1 | 0.113855  | 0         | 0         | No change |
| NM_146858 | Olfr275     | 0 | 1 | -2.47111  | 0.362984  | 0         | No change |
| NM_146859 | Olfr371     | 0 | 1 | -3.20807  | 0.667983  | 0         | No change |
| NM_146860 | Olfr161     | 0 | 1 | -3.05607  | 0.591872  | 0         | No change |
| NM_146861 | Olfr9       | 0 | 1 | 0.113855  | 0         | 0         | No change |
| NM_146862 | Olfr763     | 0 | 1 | 0.113855  | 0         | 0         | No change |
| NM_146863 | Olfr770     | 0 | 1 | 0.113855  | 0         | 0         | No change |
| NM_146864 | Olfr768     | 0 | 1 | 0.113855  | 0         | 0         | No change |
| NM_146865 | Olfr992     | 0 | 1 | -0.886145 | 0.0749386 | 0         | No change |
| NM_146866 | Olfr1008    | 0 | 1 | 0.113855  | 0         | 0         | No change |
| NM_146867 | Olfr131     | 0 | 1 | 0.113855  | 0         | 0         | No change |
| NM_146868 | Olfr894     | 0 | 1 | 0.113855  | 0         | 0         | No change |
| NM_146869 | Olfr147     | 0 | 1 | 0.113855  | 0         | 0         | No change |
| NM_146870 | Olfr25      | 0 | 1 | -3.20807  | 0.5873    | 0         | No change |
| NM_146871 | Olfr898     | 0 | 1 | -0.886145 | 0.0732838 | 0         | No change |
| NM_146872 | Olfr908     | 0 | 1 | 0.113855  | 0         | 0         | No change |
| NM_146873 | Olfr911-ps1 | 0 | 1 | 0.113855  | 0         | 0         | No change |
| NM_146874 | Olfr900     | 0 | 1 | -0.886145 | 0.0732838 | 0         | No change |
| NM_146875 | Olfr895     | 0 | 1 | 0.113855  | 0         | 0         | No change |
| NM_146877 | Olfr1395    | 0 | 1 | 0.113855  | 0         | 0         | No change |
| NM_146878 | Olfr30      | 0 | 1 | -1.47111  | 0.130756  | 0         | No change |
| NM_146879 | Olfr330     | 0 | 1 | -1.47111  | 0.128822  | 0         | No change |
| NM_146881 | Olfr1404    | 0 | 1 | 0.113855  | 0         | 0         | No change |
| NM_146882 | Olfr874     | 0 | 1 | -0.886145 | 0.0746977 | 0         | No change |
| NM_146883 | Olfr876     | 0 | 1 | 0.113855  | 0         | 0         | No change |
| NM_146884 | Olfr1299    | 0 | 1 | 0.113855  | 0         | 0         | No change |
| NM_146885 | Olfr1294    | 0 | 1 | 0.113855  | 0         | 0         | No change |
| NM_146886 | Olfr1298    | 0 | 1 | -0.886145 | 0.0742204 | 0         | No change |
| NM_146887 | Olfr1301    | 0 | 1 | 0.113855  | 0         | 0         | No change |
| NM_146888 | Olfr1297    | 0 | 1 | 0.113855  | 0         | 0         | No change |
| NM_146889 | Olfr1302    | 0 | 1 | 0.113855  | 0         | 0         | No change |
| NM_146891 | Olfr1225    | 0 | 1 | -0.886145 | 0.0678607 | 0         | No change |
| NM_146892 | Olfr1223    | 0 | 1 | 0.113855  | 0         | 0         | No change |
| NM_146893 | Olfr1216    | 0 | 1 | 0.113855  | 0         | 0         | No change |
| NM_146895 | Olfr1201    | 0 | 1 | 0.113855  | 0         | 0         | No change |
| NM_146896 | Olfr1205    | 0 | 1 | 0.113855  | 0         | 0         | No change |
| NM_146897 | Olfr1214    | 0 | 1 | 0.113855  | 0         | 0         | No change |
| NM_146898 | Olfr1213    | 0 | 1 | 0.113855  | 0         | 0         | No change |
| NM_146899 | Olfr1219    | 0 | 1 | 0.113855  | 0         | 0         | No change |
| NM_146900 | Olfr1220    | 0 | 1 | 0.113855  | 0         | 0         | No change |
| NM_146901 | Olfr1217    | 0 | 1 | 0.113855  | 0         | 0         | No change |
| NM_146902 | Olfr1221    | 0 | 1 | 0.113855  | 0         | 0         | No change |
| NM_146903 | Olfr871     | 0 | 1 | 0.113855  | 0         | 0         | No change |
| NM_146904 | Olfr870     | 0 | 1 | 0.113855  | 0         | 0         | No change |
| NM_146905 | Olfr851     | 0 | 1 | 0.113855  | 0         | 0         | No change |
| NM_146906 | Olfr853     | 0 | 1 | 0.113855  | 0         | 0         | No change |
| NM_146907 | Olfr1282    | 0 | 1 | -1.47111  | 0.151836  | 0         | No change |
| NM_146909 | Olfr51      | 0 | 1 | 0.113855  | 0         | 0         | No change |
| NM_146910 | Olfr1378    | 0 | 1 | -0.886145 | 0.0735158 | 0         | No change |
| NM_146911 | Olfr1377    | 0 | 1 | 0.113855  | 0         | 0         | No change |
| NM_146912 | Olfr211     | 0 | 1 | 0.113855  | 0         | 0         | No change |
| NM_146913 | Olfr1348    | 0 | 1 | 1.11385   | 0         | 0.0764547 | No change |
| NM_146914 | Olfr5       | 0 | 1 | -0.301183 | 0.222661  | 0.152909  | No change |
| NM_146915 | Olfr1336    | 0 | 1 | -1.47111  | 0.147498  | 0         | No change |
| NM_146916 | Olfr1346    | 0 | 1 | -0.886145 | 0.073984  | 0         | No change |
| NM_146917 | Olfr1179    | 0 | 1 | 0.113855  | 0         | 0         | No change |
| NM_146918 | Olfr1180    | 0 | 1 | 0.113855  | 0         | 0         | No change |
| NM_146919 | Olfr1188    | 0 | 1 | 0.113855  | 0         | 0         | No change |
| NM_146920 | Olfr267     | 0 | 1 | -0.538222 | 0.73984   | 0.457267  | No change |
| NM_146921 | Olfr1       | 0 | 1 | 0.113855  | 0         | 0         | No change |
| NM_146923 | Olfr20      | 0 | 1 | -2.6935   | 0.393745  | 0         | No change |
| NM_146924 | Olfr476     | 0 | 1 | 0.113855  | 0         | 0         | No change |
| NM_146925 | Olfr481     | 0 | 1 | 0.113855  | 0         | 0         | No change |
| NM_146926 | Olfr477     | 0 | 1 | 0.113855  | 0         | 0         | No change |
| NM_146927 | Olfr799     | 0 | 1 | 0.113855  | 0         | 0         | No change |

|           |             |   |   |           |           |           |           |
|-----------|-------------|---|---|-----------|-----------|-----------|-----------|
| NM_146928 | Olfr808     | 0 | 1 | 0.113855  | 0         | 0         | No change |
| NM_146929 | Olfr807     | 0 | 1 | 0.113855  | 0         | 0         | No change |
| NM_146930 | Olfr791     | 0 | 1 | 0.113855  | 0         | 0         | No change |
| NM_146931 | Olfr796     | 0 | 1 | 0.113855  | 0         | 0         | No change |
| NM_146932 | Olfr802     | 0 | 1 | 0.113855  | 0         | 0         | No change |
| NM_146933 | Olfr790     | 0 | 1 | -1.88615  | 0.215768  | 0         | No change |
| NM_146934 | Olfr46      | 0 | 1 | -1.88615  | 0.218473  | 0         | No change |
| NM_146935 | Olfr167     | 0 | 1 | 0.113855  | 0         | 0         | No change |
| NM_146936 | Olfr1417    | 0 | 1 | 0.113855  | 0         | 0         | No change |
| NM_146937 | Olfr63      | 0 | 1 | 0.113855  | 0         | 0         | No change |
| NM_146938 | Olfr346     | 0 | 1 | 0.113855  | 0         | 0         | No change |
| NM_146939 | Olfr354     | 0 | 1 | 0.113855  | 0         | 0         | No change |
| NM_146940 | Olfr352     | 0 | 1 | 0.113855  | 0         | 0         | No change |
| NM_146941 | Olfr353     | 0 | 1 | 0.113855  | 0         | 0         | No change |
| NM_146942 | Olfr351     | 0 | 1 | 0.113855  | 0         | 0         | No change |
| NM_146943 | Olfr347     | 0 | 1 | 0.113855  | 0         | 0         | No change |
| NM_146944 | Olfr348     | 0 | 1 | 0.113855  | 0         | 0         | No change |
| NM_146945 | Olfr345     | 0 | 1 | 0.113855  | 0         | 0         | No change |
| NM_146946 | Olfr50      | 0 | 1 | 0.113855  | 0         | 0         | No change |
| NM_146947 | Olfr338     | 0 | 1 | 0.113855  | 0         | 0         | No change |
| NM_146948 | Olfr342     | 0 | 1 | 0.113855  | 0         | 0         | No change |
| NM_146949 | Olfr339     | 0 | 1 | 0.113855  | 0         | 0         | No change |
| NM_146950 | Olfr341     | 0 | 1 | 0.113855  | 0         | 0         | No change |
| NM_146951 | Olfr340     | 0 | 1 | 0.113855  | 0         | 0         | No change |
| NM_146952 | Olfr522     | 0 | 1 | 0.113855  | 0         | 0         | No change |
| NM_146953 | Olfr531     | 0 | 1 | 0.113855  | 0         | 0         | No change |
| NM_146954 | Olfr535     | 0 | 1 | 1.11385   | 0         | 0.0764547 | No change |
| NM_146955 | Olfr60      | 0 | 1 | -0.886145 | 0.0744583 | 0         | No change |
| NM_146956 | Olfr525     | 0 | 1 | 0.113855  | 0         | 0         | No change |
| NM_146957 | Olfr170     | 0 | 1 | 0.113855  | 0         | 0         | No change |
| NM_146958 | Olfr171     | 0 | 1 | 0.113855  | 0         | 0         | No change |
| NM_146959 | Olfr631     | 0 | 1 | -1.47111  | 0.0936104 | 0         | No change |
| NM_146960 | Olfr53      | 0 | 1 | 0.113855  | 0         | 0         | No change |
| NM_146961 | Olfr539     | 0 | 1 | 0.113855  | 0         | 0         | No change |
| NM_146962 | Olfr541     | 0 | 1 | 0.113855  | 0         | 0         | No change |
| NM_146963 | Olfr45      | 0 | 1 | -0.886145 | 0.0744583 | 0         | No change |
| NM_146964 | Olfr61      | 0 | 1 | 0.113855  | 0         | 0         | No change |
| NM_146965 | Olfr1250    | 0 | 1 | 0.113855  | 0         | 0         | No change |
| NM_146966 | Olfr1247    | 0 | 1 | 0.113855  | 0         | 0         | No change |
| NM_146967 | Olfr1226    | 0 | 1 | 0.113855  | 0         | 0         | No change |
| NM_146968 | Olfr1242    | 0 | 1 | 0.113855  | 0         | 0         | No change |
| NM_146969 | Olfr1243    | 0 | 1 | 0.113855  | 0         | 0         | No change |
| NM_146970 | Olfr1239    | 0 | 1 | 0.113855  | 0         | 0         | No change |
| NM_146971 | Olfr1228    | 0 | 1 | 0.113855  | 0         | 0         | No change |
| NM_146972 | Olfr1233    | 0 | 1 | -0.886145 | 0.0759182 | 0         | No change |
| NM_146973 | Olfr1234    | 0 | 1 | 0.113855  | 0         | 0         | No change |
| NM_146974 | Olfr1262    | 0 | 1 | 0.113855  | 0         | 0         | No change |
| NM_146975 | Olfr1273-ps | 0 | 1 | -0.886145 | 0.0754253 | 0         | No change |
| NM_146977 | Olfr1255    | 0 | 1 | 0.113855  | 0         | 0         | No change |
| NM_146978 | Olfr1258    | 0 | 1 | 1.11385   | 0         | 0.0766998 | No change |
| NM_146980 | Olfr1272    | 0 | 1 | -1.47111  | 0.150362  | 0         | No change |
| NM_146981 | Olfr1260    | 0 | 1 | 0.113855  | 0         | 0         | No change |
| NM_146982 | Olfr1257    | 0 | 1 | 0.113855  | 0         | 0         | No change |
| NM_146983 | Olfr1256    | 0 | 1 | 0.113855  | 0         | 0         | No change |
| NM_146984 | Olfr142     | 0 | 1 | 0.113855  | 0         | 0         | No change |
| NM_146985 | Olfr1270    | 0 | 1 | 0.113855  | 0         | 0         | No change |
| NM_146986 | Olfr38      | 0 | 1 | 0.113855  | 0         | 0         | No change |
| NM_146987 | Olfr457     | 0 | 1 | 1.69882   | 0         | 0.152422  | No change |
| NM_146988 | Olfr447     | 0 | 1 | 0.113855  | 0         | 0         | No change |
| NM_146989 | Olfr1496    | 0 | 1 | -0.886145 | 0.0653167 | 0         | No change |
| NM_146990 | Olfr1494    | 0 | 1 | 0.113855  | 0         | 0         | No change |
| NM_146991 | Olfr206     | 0 | 1 | -1.47111  | 0.151342  | 0         | No change |
| NM_146992 | Olfr204     | 0 | 1 | 0.113855  | 0         | 0         | No change |
| NM_146993 | Olfr176     | 0 | 1 | 0.113855  | 0.0746177 | 0.076864  | No change |
| NM_146994 | Olfr201     | 0 | 1 | -1.47111  | 0.150362  | 0         | No change |
| NM_146995 | Olfr202     | 0 | 1 | 0.113855  | 0         | 0         | No change |
| NM_146996 | Olfr177     | 0 | 1 | 0.113855  | 0.0749386 | 0.0771946 | No change |
| NM_146997 | Olfr178     | 0 | 1 | -0.886145 | 0.0725968 | 0         | No change |
| NM_146998 | Olfr195     | 0 | 1 | -2.20807  | 0.300725  | 0         | No change |
| NM_146999 | Olfr181     | 0 | 1 | -2.88615  | 0.350719  | 0         | No change |
| NM_147000 | Olfr173     | 0 | 1 | -0.886145 | 0.0598737 | 0         | No change |
| NM_147001 | Olfr172     | 0 | 1 | -2.20807  | 0.576504  | 0.0659843 | No change |
| NM_147002 | Olfr175-ps1 | 0 | 1 | 1.69882   | 0         | 0.139535  | No change |
| NM_147003 | Olfr139     | 0 | 1 | 0.113855  | 0         | 0         | No change |
| NM_147004 | Olfr399     | 0 | 1 | 0.113855  | 0         | 0         | No change |
| NM_147005 | Olfr395     | 0 | 1 | 0.113855  | 0         | 0         | No change |



|           |             |   |   |           |           |           |           |
|-----------|-------------|---|---|-----------|-----------|-----------|-----------|
| NM_147006 | Olfr392     | 0 | 1 | 0.113855  | 0         | 0         | No change |
| NM_147007 | Olfr394     | 0 | 1 | 0.113855  | 0         | 0         | No change |
| NM_147008 | Olfr393     | 0 | 1 | 0.113855  | 0         | 0         | No change |
| NM_147009 | Olfr389     | 0 | 1 | -1.47111  | 0.0999182 | 0         | No change |
| NM_147010 | Olfr1052    | 0 | 1 | 0.113855  | 0         | 0         | No change |
| NM_147011 | Olfr1044    | 0 | 1 | 0.113855  | 0         | 0         | No change |
| NM_147012 | Olfr1047    | 0 | 1 | 0.113855  | 0         | 0         | No change |
| NM_147013 | Olfr1038-ps | 0 | 1 | 0.113855  | 0         | 0         | No change |
| NM_147014 | Olfr1048    | 0 | 1 | 0.113855  | 0         | 0         | No change |
| NM_147015 | Olfr1019    | 0 | 1 | 0.113855  | 0         | 0         | No change |
| NM_147016 | Olfr1049    | 0 | 1 | 0.113855  | 0         | 0         | No change |
| NM_147017 | Olfr1045    | 0 | 1 | 0.113855  | 0         | 0         | No change |
| NM_147018 | Olfr1056    | 0 | 1 | 0.113855  | 0         | 0         | No change |
| NM_147019 | Olfr1054    | 0 | 1 | -0.886145 | 0.0742204 | 0         | No change |
| NM_147021 | Olfr1055    | 0 | 1 | 0.113855  | 0         | 0         | No change |
| NM_147022 | Olfr381     | 0 | 1 | 0.113855  | 0         | 0         | No change |
| NM_147023 | Olfr385     | 0 | 1 | 0.113855  | 0         | 0         | No change |
| NM_147024 | Olfr378     | 0 | 1 | 0.113855  | 0         | 0         | No change |
| NM_147025 | Olfr380     | 0 | 1 | 0.113855  | 0         | 0         | No change |
| NM_147026 | Olfr532     | 0 | 1 | 0.113855  | 0         | 0         | No change |
| NM_147027 | Olfr31      | 0 | 1 | -3.05607  | 0.584427  | 0         | No change |
| NM_147028 | Olfr1124    | 0 | 1 | 0.113855  | 0         | 0         | No change |
| NM_147029 | Olfr1120    | 0 | 1 | 0.113855  | 0         | 0         | No change |
| NM_147030 | Olfr1134    | 0 | 1 | -0.886145 | 0.0619493 | 0         | No change |
| NM_147031 | Olfr1122    | 0 | 1 | -0.886145 | 0.0710428 | 0         | No change |
| NM_147032 | Olfr705     | 0 | 1 | 0.113855  | 0         | 0         | No change |
| NM_147033 | Olfr714     | 0 | 1 | 0.113855  | 0         | 0         | No change |
| NM_147034 | Olfr713     | 0 | 1 | 0.113855  | 0         | 0         | No change |
| NM_147035 | Olfr711     | 0 | 1 | 0.113855  | 0         | 0         | No change |
| NM_147036 | Olfr283     | 0 | 1 | 0.113855  | 0         | 0         | No change |
| NM_147037 | Olfr1413    | 0 | 1 | -1.88615  | 0.193234  | 0         | No change |
| NM_147038 | Olfr1416    | 0 | 1 | 0.113855  | 0         | 0         | No change |
| NM_147039 | Olfr1414    | 0 | 1 | 1.81429   | 0.175844  | 0.724551  | No change |
| NM_147040 | Olfr1351    | 0 | 1 | -1.88615  | 0.508178  | 0.0747823 | No change |
| NM_147041 | Olfr57      | 0 | 1 | -2.6935   | 0.387183  | 0         | No change |
| NM_147042 | Olfr1353    | 0 | 1 | -1.47111  | 0.110099  | 0         | No change |
| NM_147043 | Olfr669     | 0 | 1 | 2.43578   | 0         | 0.30101   | No change |
| NM_147044 | Olfr679     | 0 | 1 | -0.886145 | 0.0735158 | 0         | No change |
| NM_147045 | Olfr683     | 0 | 1 | 0.113855  | 0         | 0         | No change |
| NM_147046 | Olfr600     | 0 | 1 | 0.113855  | 0         | 0         | No change |
| NM_147047 | Olfr618     | 0 | 1 | 0.113855  | 0         | 0         | No change |
| NM_147048 | Olfr652     | 0 | 1 | -1.47111  | 0.131372  | 0         | No change |
| NM_147049 | Olfr658     | 0 | 1 | -0.301183 | 0.071799  | 0.049307  | No change |
| NM_147050 | Olfr659     | 0 | 1 | 0.113855  | 0         | 0         | No change |
| NM_147051 | Olfr362     | 0 | 1 | -1.47111  | 0.146107  | 0         | No change |
| NM_147052 | Olfr589     | 0 | 1 | 0.113855  | 0         | 0         | No change |
| NM_147053 | Olfr582     | 0 | 1 | 0.113855  | 0         | 0         | No change |
| NM_147054 | Olfr584     | 0 | 1 | 0.113855  | 0         | 0         | No change |
| NM_147055 | Olfr649     | 0 | 1 | 0.113855  | 0         | 0         | No change |
| NM_147056 | Olfr646     | 0 | 1 | 0.113855  | 0         | 0         | No change |
| NM_147059 | Olfr668     | 0 | 1 | 0.698817  | 0.0728244 | 0.150033  | No change |
| NM_147060 | Olfr667     | 0 | 1 | 1.11385   | 0         | 0.0731814 | No change |
| NM_147061 | Olfr691     | 0 | 1 | -1.47111  | 0.359613  | 0.0740877 | No change |
| NM_147062 | Olfr124     | 0 | 1 | 0.113855  | 0         | 0         | No change |
| NM_147063 | Olfr520     | 0 | 1 | 0.113855  | 0         | 0         | No change |
| NM_147064 | Olfr449     | 0 | 1 | 0.113855  | 0         | 0         | No change |
| NM_147065 | Olfr1390    | 0 | 1 | 0.113855  | 0         | 0         | No change |
| NM_147066 | Olfr1389    | 0 | 1 | -1.47111  | 0.129903  | 0         | No change |
| NM_147067 | Olfr829     | 0 | 1 | 0.113855  | 0         | 0         | No change |
| NM_147068 | Olfr166     | 0 | 1 | 0.113855  | 0         | 0         | No change |
| NM_147069 | Olfr686     | 0 | 1 | 0.113855  | 0         | 0         | No change |
| NM_147070 | Olfr603     | 0 | 1 | 0.113855  | 0         | 0         | No change |
| NM_147071 | Olfr1352    | 0 | 1 | -1.88615  | 0.178091  | 0         | No change |
| NM_147072 | Olfr641     | 0 | 1 | 0.113855  | 0         | 0         | No change |
| NM_147073 | Olfr33      | 0 | 1 | 0.113855  | 0         | 0         | No change |
| NM_147074 | Olfr653     | 0 | 1 | 1.69882   | 0         | 0.137268  | No change |
| NM_147075 | Olfr656     | 0 | 1 | -0.886145 | 0.211191  | 0.0725161 | No change |
| NM_147076 | Olfr619     | 0 | 1 | 0.113855  | 0         | 0         | No change |
| NM_147077 | Olfr643     | 0 | 1 | 0.113855  | 0         | 0         | No change |
| NM_147078 | Olfr1062    | 0 | 1 | 0.113855  | 0         | 0         | No change |
| NM_147079 | Olfr547     | 0 | 1 | 0.113855  | 0         | 0         | No change |
| NM_147080 | Olfr615     | 0 | 1 | 0.113855  | 0         | 0         | No change |
| NM_147081 | Olfr610     | 0 | 1 | 0.113855  | 0         | 0         | No change |
| NM_147082 | Olfr609     | 0 | 1 | 0.113855  | 0         | 0         | No change |
| NM_147083 | Olfr622     | 0 | 1 | 0.113855  | 0         | 0         | No change |
| NM_147084 | Olfr639     | 0 | 1 | 0.113855  | 0         | 0         | No change |

|           |          |   |   |            |           |           |           |
|-----------|----------|---|---|------------|-----------|-----------|-----------|
| NM_147085 | Olfr571  | 0 | 1 | 0.113855   | 0         | 0         | No change |
| NM_147087 | Olfr585  | 0 | 1 | 0.113855   | 0         | 0         | No change |
| NM_147088 | Olfr569  | 0 | 1 | 0.113855   | 0         | 0         | No change |
| NM_147089 | Olfr572  | 0 | 1 | 0.113855   | 0         | 0         | No change |
| NM_147091 | Olfr568  | 0 | 1 | -0.886145  | 0.073984  | 0         | No change |
| NM_147092 | Olfr561  | 0 | 1 | 0.113855   | 0         | 0         | No change |
| NM_147093 | Olfr558  | 0 | 1 | 0.113855   | 0.190744  | 0.196486  | No change |
| NM_147094 | Olfr606  | 0 | 1 | 0.113855   | 0         | 0         | No change |
| NM_147095 | Olfr676  | 0 | 1 | 0.113855   | 0         | 0         | No change |
| NM_147096 | Olfr666  | 0 | 1 | -0.248715  | 0.582595  | 0.4501    | No change |
| NM_147097 | Olfr628  | 0 | 1 | 0.113855   | 0         | 0         | No change |
| NM_147098 | Olfr630  | 0 | 1 | 0.113855   | 0         | 0         | No change |
| NM_147099 | Olfr616  | 0 | 1 | 0.113855   | 0         | 0         | No change |
| NM_147100 | Olfr613  | 0 | 1 | -1.05607   | 0.108535  | 0.0419258 | No change |
| NM_147101 | Olfr549  | 0 | 1 | 0.113855   | 0         | 0         | No change |
| NM_147102 | Olfr552  | 0 | 1 | 0.113855   | 0         | 0         | No change |
| NM_147103 | Olfr555  | 0 | 1 | 0.113855   | 0         | 0         | No change |
| NM_147104 | Olfr550  | 0 | 1 | 0.113855   | 0         | 0         | No change |
| NM_147105 | Olfr978  | 0 | 1 | -1.47111   | 0.148917  | 0         | No change |
| NM_147106 | Olfr980  | 0 | 1 | -1.88615   | 0.201814  | 0         | No change |
| NM_147107 | Olfr974  | 0 | 1 | -0.886145  | 0.0746977 | 0         | No change |
| NM_147108 | Olfr979  | 0 | 1 | -3.05607   | 0.533534  | 0         | No change |
| NM_147109 | Olfr577  | 0 | 1 | 0.113855   | 0         | 0         | No change |
| NM_147110 | Olfr570  | 0 | 1 | 0.113855   | 0         | 0         | No change |
| NM_147111 | Olfr586  | 0 | 1 | 0.113855   | 0         | 0         | No change |
| NM_147112 | Olfr559  | 0 | 1 | 0.113855   | 0         | 0         | No change |
| NM_147113 | Olfr560  | 0 | 1 | 1.69882    | 0         | 0.151939  | No change |
| NM_147114 | Olfr575  | 0 | 1 | 0.113855   | 0         | 0         | No change |
| NM_147115 | Olfr578  | 0 | 1 | 0.113855   | 0         | 0         | No change |
| NM_147118 | Olfr635  | 0 | 1 | -1.88615   | 0.216438  | 0         | No change |
| NM_147119 | Olfr632  | 0 | 1 | -0.886145  | 0.0730534 | 0         | No change |
| NM_147120 | Olfr638  | 0 | 1 | -0.886145  | 0.0721459 | 0         | No change |
| NM_147121 | Olfr644  | 0 | 1 | 0.113855   | 0         | 0         | No change |
| NM_147122 | Olfr623  | 0 | 1 | 0.113855   | 0         | 0         | No change |
| NM_147221 | Glis1    | 0 | 1 | -0.175652  | 0.239989  | 0.197771  | No change |
| NM_147222 | Rdh19    | 0 | 1 | -0.886145  | 0.110682  | 0.0380047 | No change |
| NM_147776 | Vwa1     | 0 | 1 | 0.121717   | 4.03953   | 4.184     | No change |
| NM_147779 | Sftpb    | 0 | 1 | 0.113855   | 0.0372093 | 0.0383294 | No change |
| NM_148413 | Myo3a    | 0 | 1 | -1.88615   | 0.0959958 | 0.0141265 | No change |
| NM_148924 | Zfp263   | 0 | 1 | -0.16093   | 15.3488   | 13.065    | No change |
| NM_148927 | Plekha4  | 0 | 1 | -0.156234  | 2.12223   | 1.80827   | No change |
| NM_148929 | Slc9a8   | 0 | 1 | -0.171206  | 6.10393   | 5.15749   | No change |
| NM_148930 | Rbm5     | 0 | 1 | -0.0159505 | 40.9082   | 38.5118   | No change |
| NM_148934 | Gm16517  | 0 | 1 | 0.391389   | 4.11448   | 5.15121   | No change |
| NM_148935 | Foxn4    | 0 | 1 | 0.113855   | 0         | 0         | No change |
| NM_148944 | Chrb4    | 0 | 1 | -1.88615   | 0.0599767 | 0         | No change |
| NM_148949 | Tdpoz1   | 0 | 1 | 0.113855   | 0         | 0         | No change |
| NM_148951 | Gipc3    | 0 | 1 | -0.564217  | 0.476417  | 0.280433  | No change |
| NM_148952 | E2f4     | 0 | 1 | -0.186269  | 6.8539    | 5.72743   | No change |
| NM_148953 | Asb16    | 0 | 1 | 0.113855   | 0         | 0         | No change |
| NM_152229 | Nr2e1    | 0 | 1 | -0.886145  | 0.0215567 | 0         | No change |
| NM_152804 | Plk2     | 0 | 1 | 0.301788   | 2.83649   | 3.33196   | No change |
| NM_152823 | Unc5cl   | 0 | 1 | 0.265858   | 0.196595  | 0.227827  | No change |
| NM_152824 | Rbm17    | 0 | 1 | 0.105935   | 24.8514   | 25.4591   | No change |
| NM_152944 | Mmp21    | 0 | 1 | 0.698817   | 0.0375097 | 0.0772777 | No change |
| NM_153054 | Slc18a1  | 0 | 1 | 0.508714   | 1.18465   | 1.61173   | No change |
| NM_153057 | Nomo1    | 0 | 1 | -0.209154  | 5.44911   | 4.48378   | No change |
| NM_153065 | Ddx27    | 0 | 1 | -0.0453438 | 3.57607   | 3.29596   | No change |
| NM_153067 | Mrgpra3  | 0 | 1 | 0.113855   | 0.0538169 | 0.055437  | No change |
| NM_153068 | Ehd2     | 0 | 1 | 0.390065   | 2.46136   | 3.07541   | No change |
| NM_153069 | Leap2    | 0 | 1 | 0.961852   | 0.560909  | 1.15559   | No change |
| NM_153071 | Gprc6a   | 0 | 1 | -1.88615   | 0.0732069 | 0         | No change |
| NM_153074 | Lrrc25   | 0 | 1 | -0.709267  | 1.20443   | 0.676741  | No change |
| NM_153076 | Crygn    | 0 | 1 | 0.528892   | 1.26924   | 1.78289   | No change |
| NM_153077 | Il1f10   | 0 | 1 | 0.113855   | 0         | 0         | No change |
| NM_153079 | Nmur2    | 0 | 1 | -1.47111   | 0.0425476 | 0         | No change |
| NM_153086 | Gjd4     | 0 | 1 | -1.47111   | 0.052381  | 0         | No change |
| NM_153087 | Hrh4     | 0 | 1 | -3.20807   | 0.408091  | 0         | No change |
| NM_153094 | Klr1f    | 0 | 1 | -0.471108  | 0.0816077 | 0.0420322 | No change |
| NM_153095 | Mrgpra1  | 0 | 1 | 0.113855   | 0         | 0         | No change |
| NM_153096 | Zfp353   | 0 | 1 | -0.964148  | 0.245638  | 0.112459  | No change |
| NM_153097 | Trim60   | 0 | 1 | -1.47111   | 0.0383666 | 0         | No change |
| NM_153101 | Mrgpra2b | 0 | 1 | -2.20807   | 0.497807  | 0.056977  | No change |
| NM_153102 | Zfp352   | 0 | 1 | 0.113855   | 0         | 0         | No change |
| NM_153108 | Defb8    | 0 | 1 | 1.11385    | 0         | 0.251017  | No change |
| NM_153111 | Fev      | 0 | 1 | -1.47111   | 0.0942433 | 0         | No change |

|           |          |   |   |            |           |           |           |
|-----------|----------|---|---|------------|-----------|-----------|-----------|
| NM_153112 | Cadm4    | 0 | 1 | 0.3065     | 0.646802  | 0.766215  | No change |
| NM_153114 | Otos     | 0 | 1 | -1.47111   | 0.197991  | 0         | No change |
| NM_153121 | Lysmd1   | 0 | 1 | -0.155664  | 6.44391   | 5.50168   | No change |
| NM_153128 | Klhl12   | 0 | 1 | 0.0289659  | 13.7162   | 13.3204   | No change |
| NM_153133 | Rdh9     | 0 | 1 | 0.320306   | 0.309976  | 0.372525  | No change |
| NM_153135 | Unc5d    | 0 | 1 | -1.79304   | 0.105824  | 0.0233593 | No change |
| NM_153137 | Traf3ip3 | 0 | 1 | 0.503801   | 0.920039  | 1.25236   | No change |
| NM_153139 | Slc36a1  | 0 | 1 | -0.382571  | 1.03073   | 0.748673  | No change |
| NM_153142 | Slc35e4  | 0 | 1 | 0.138102   | 1.32141   | 1.38466   | No change |
| NM_153151 | Acat3    | 0 | 1 | -0.0680533 | 151.252   | 137.344   | No change |
| NM_153154 | Tcfap2d  | 0 | 1 | 1.11385    | 0         | 0.0410939 | No change |
| NM_153155 | C1ql3    | 0 | 1 | 1.22933    | 0.110169  | 0.272365  | No change |
| NM_153156 | Stoml3   | 0 | 1 | 0.113855   | 0.0806631 | 0.0830914 | No change |
| NM_153157 | Olfm3    | 0 | 1 | -1.47111   | 0.0354852 | 0         | No change |
| NM_153159 | Zc3h12a  | 0 | 1 | 0.289705   | 1.31684   | 1.53564   | No change |
| NM_153166 | Cpne5    | 0 | 1 | 0.233997   | 6.04985   | 6.77459   | No change |
| NM_153169 | Pnma3    | 0 | 1 | 1.11385    | 0.0818713 | 0.189756  | No change |
| NM_153170 | Slc36a2  | 0 | 1 | 0.113855   | 0.143342  | 0.147657  | No change |
| NM_153171 | Rgs13    | 0 | 1 | 0.698817   | 0.0465551 | 0.0959131 | No change |
| NM_153175 | Gimap6   | 0 | 1 | 0.186367   | 4.15045   | 4.49807   | No change |
| NM_153176 | Spg7     | 0 | 1 | -0.112847  | 12.1513   | 10.6929   | No change |
| NM_153178 | Eif2c2   | 0 | 1 | 0.0229884  | 4.82496   | 4.66628   | No change |
| NM_153195 | Fbxo7    | 0 | 1 | 0.0192918  | 12.1944   | 11.7621   | No change |
| NM_153196 | Rbks     | 0 | 1 | -0.146909  | 8.56713   | 7.3542    | No change |
| NM_153389 | Atp10d   | 0 | 1 | -0.310643  | 1.7594    | 1.34735   | No change |
| NM_153402 | Eif2c3   | 0 | 1 | 0.070969   | 4.3541    | 4.35353   | No change |
| NM_153408 | Neur13   | 0 | 1 | 0.313164   | 0.701516  | 0.833809  | No change |
| NM_153419 | Grwd1    | 0 | 1 | -0.443835  | 4.76345   | 3.32156   | No change |
| NM_153423 | Wasf2    | 0 | 1 | -0.201868  | 4.92692   | 4.07424   | No change |
| NM_153502 | Ankrd23  | 0 | 1 | -0.350813  | 2.42534   | 1.80029   | No change |
| NM_153503 | Rnf113a1 | 0 | 1 | 0.814295   | 0.930894  | 1.5982    | No change |
| NM_153504 | Rnf183   | 0 | 1 | 0.187855   | 0.893499  | 0.97153   | No change |
| NM_153506 | Clec2e   | 0 | 1 | 1.43578    | 0.0306882 | 0.126448  | No change |
| NM_153507 | Cpne2    | 0 | 1 | 0.113855   | 0.18165   | 0.187118  | No change |
| NM_153509 | AF529169 | 0 | 1 | 0.599282   | 0.0656706 | 0.101471  | No change |
| NM_153510 | Pilra    | 0 | 1 | -0.371572  | 1.48111   | 1.08186   | No change |
| NM_153511 | Il1f9    | 0 | 1 | 0.85082    | 0.0846302 | 0.174356  | No change |
| NM_153513 | BC028528 | 0 | 1 | 0.265858   | 2.65051   | 3.05152   | No change |
| NM_153520 | Opalin   | 0 | 1 | 0.113855   | 0         | 0         | No change |
| NM_153524 | Mrgpra4  | 0 | 1 | 0.113855   | 0         | 0         | No change |
| NM_153525 | Tmem41b  | 0 | 1 | 0.00586176 | 13.8654   | 13.2513   | No change |
| NM_153529 | Nrn1     | 0 | 1 | -1.1399    | 1.31084   | 0.54012   | No change |
| NM_153537 | Phldb1   | 0 | 1 | 0.261197   | 1.17496   | 1.34189   | No change |
| NM_153540 | C85492   | 0 | 1 | 0.327562   | 3.47141   | 4.15169   | No change |
| NM_153541 | Zbtb8b   | 0 | 1 | 0.180969   | 1.31416   | 1.41923   | No change |
| NM_153542 | Lrrc20   | 0 | 1 | -0.0594768 | 2.79197   | 2.54733   | No change |
| NM_153551 | Dennd1c  | 0 | 1 | 0.539161   | 0.939929  | 1.30995   | No change |
| NM_153553 | Npas4    | 0 | 1 | 0.528892   | 0.0425346 | 0.0657226 | No change |
| NM_153562 | Rrnad1   | 0 | 1 | 0.0205986  | 16.0095   | 15.4576   | No change |
| NM_153564 | Gbp5     | 0 | 1 | -0.388646  | 0.369112  | 0.261404  | No change |
| NM_153565 | Pcsk9    | 0 | 1 | -0.264657  | 0.238131  | 0.183975  | No change |
| NM_153566 | Yrdc     | 0 | 1 | 0.249738   | 7.22044   | 8.17696   | No change |
| NM_153570 | Noc4l    | 0 | 1 | -0.199085  | 6.80181   | 5.63343   | No change |
| NM_153574 | Fam13a   | 0 | 1 | 0.329584   | 1.49354   | 1.78934   | No change |
| NM_153576 | Cxcl17   | 0 | 1 | -2.6935    | 0.550207  | 0         | No change |
| NM_153577 | Al428936 | 0 | 1 | -0.400718  | 0.463247  | 0.318128  | No change |
| NM_153578 | Nipa1    | 0 | 1 | 0.534993   | 2.1444    | 2.97066   | No change |
| NM_153581 | Gpm6a    | 0 | 1 | -0.388646  | 0.334159  | 0.23665   | No change |
| NM_153587 | Rps6ka5  | 0 | 1 | -0.220881  | 3.11609   | 2.54185   | No change |
| NM_153590 | Klre1    | 0 | 1 | 0.113855   | 0.076334  | 0.078632  | No change |
| NM_153596 | Tmem17   | 0 | 1 | 0.0289659  | 1.72961   | 1.67687   | No change |
| NM_153597 | Trpt1    | 0 | 1 | 0.3065     | 2.49774   | 2.94945   | No change |
| NM_153744 | Prkag3   | 0 | 1 | 0.765932   | 0.147655  | 0.253499  | No change |
| NM_153749 | Mill1    | 0 | 1 | -0.248715  | 0.224003  | 0.17306   | No change |
| NM_153760 | Mill2    | 0 | 1 | 0.698817   | 1.23178   | 1.93669   | No change |
| NM_153762 | Rnf26    | 0 | 1 | -0.0207947 | 6.16833   | 5.78501   | No change |
| NM_153774 | Ipo9     | 0 | 1 | 0.137493   | 10.1365   | 10.6144   | No change |
| NM_153776 | Tmem121  | 0 | 1 | 0.528892   | 0.0871162 | 0.134608  | No change |
| NM_153784 | Ccdc64b  | 0 | 1 | 0.376889   | 0.688952  | 0.859101  | No change |
| NM_153786 | Vgll2    | 0 | 1 | -0.471108  | 0.237698  | 0.146912  | No change |
| NM_153790 | Scarf2   | 0 | 1 | -0.6935    | 0.865358  | 0.500058  | No change |
| NM_153793 | Rel12    | 0 | 1 | -0.471108  | 1.26212   | 0.853203  | No change |
| NM_153795 | Fermt3   | 0 | 1 | 0.29941    | 1.34698   | 1.58179   | No change |
| NM_153799 | Edc3     | 0 | 1 | 0.298561   | 4.25415   | 4.98369   | No change |
| NM_153800 | Arhgap22 | 0 | 1 | -0.115627  | 0.885245  | 0.773729  | No change |
| NM_153801 | Tecrl    | 0 | 1 | 0.113855   | 0         | 0         | No change |

|           |               |   |   |            |           |           |           |
|-----------|---------------|---|---|------------|-----------|-----------|-----------|
| NM_153806 | Dnttip2       | 0 | 1 | -0.0966439 | 17.4885   | 15.5652   | No change |
| NM_153807 | Acsf2         | 0 | 1 | 0.0549611  | 1.11273   | 1.09944   | No change |
| NM_153820 | Arhgap15      | 0 | 1 | 0.0680511  | 0.815276  | 0.812728  | No change |
| NM_170593 | Disp2         | 0 | 1 | 1.3065     | 0.06308   | 0.162448  | No change |
| NM_170684 | Cpne7         | 0 | 1 | 0.113855   | 0.724459  | 0.746268  | No change |
| NM_170756 | Spata2        | 0 | 1 | 0.122417   | 2.91259   | 3.01824   | No change |
| NM_170759 | Zfp628        | 0 | 1 | -0.341825  | 0.929503  | 0.692648  | No change |
| NM_170760 | U2af1l4       | 0 | 1 | 0.373918   | 6.45305   | 7.97677   | No change |
| NM_170778 | Dpyd          | 0 | 1 | 0.146769   | 2.02623   | 2.13577   | No change |
| NM_170786 | Cntf          | 0 | 1 | -0.313566  | 2.19779   | 1.66817   | No change |
| NM_171826 | Cldnd1        | 0 | 1 | -0.22467   | 10.6335   | 8.65514   | No change |
| NM_172015 | lars          | 0 | 1 | -0.156066  | 3.97928   | 3.39684   | No change |
| NM_172050 | Cd300e        | 0 | 1 | -1.47111   | 0.0715166 | 0         | No change |
| NM_172054 | Txndc9        | 0 | 1 | -0.133825  | 11.0393   | 9.57525   | No change |
| NM_172132 | Kdm4b         | 0 | 1 | 0.199798   | 5.89593   | 6.44717   | No change |
| NM_172133 | Adap2         | 0 | 1 | 0.3065     | 0.872798  | 1.03393   | No change |
| NM_172142 | Nfkbid        | 0 | 1 | 0.751285   | 0.277385  | 0.46432   | No change |
| NM_172143 | Ofcc1         | 0 | 1 | -0.886145  | 0.0247489 | 0         | No change |
| NM_172145 | Fam176b       | 0 | 1 | 0.580423   | 2.76113   | 3.95035   | No change |
| NM_172148 | B9d2          | 0 | 1 | 0.140822   | 3.54949   | 3.72666   | No change |
| NM_172150 | Ift52         | 0 | 1 | 0.173051   | 12.5014   | 13.4186   | No change |
| NM_172151 | Zdhhc8        | 0 | 1 | 0.147407   | 3.6364    | 3.83436   | No change |
| NM_172152 | Slc24a4       | 0 | 1 | -0.623111  | 0.133256  | 0.0686338 | No change |
| NM_172155 | Pr13d2        | 0 | 1 | 0.113855   | 0         | 0         | No change |
| NM_172156 | Pr13d3        | 0 | 1 | 0.113855   | 0         | 0         | No change |
| NM_172162 | Hinfp         | 0 | 1 | 0.163243   | 6.63742   | 7.07654   | No change |
| NM_172203 | Nox1          | 0 | 1 | 0.113855   | 0.0823794 | 0.0848593 | No change |
| NM_172252 | Mrpl21        | 0 | 1 | 0.476425   | 1.89688   | 2.53295   | No change |
| NM_172259 | Myl6b         | 0 | 1 | -0.574201  | 3.87183   | 2.44901   | No change |
| NM_172260 | Cep68         | 0 | 1 | 0.228222   | 5.78118   | 6.44775   | No change |
| NM_172261 | Ppp1r9b       | 0 | 1 | -0.0026592 | 5.58509   | 5.30557   | No change |
| NM_172267 | Phyhd1        | 0 | 1 | 0.624817   | 2.04056   | 3.01824   | No change |
| NM_172269 | Vps18         | 0 | 1 | -0.0438847 | 4.79633   | 4.42717   | No change |
| NM_172276 | Sfswap        | 0 | 1 | 0.12535    | 5.25387   | 5.45551   | No change |
| NM_172277 | Snx8          | 0 | 1 | 0.136755   | 3.30855   | 3.46312   | No change |
| NM_172279 | Mark4         | 0 | 1 | -0.248715  | 2.4681    | 1.97036   | No change |
| NM_172282 | Tmco3         | 0 | 1 | 0.031819   | 3.04417   | 2.9616    | No change |
| NM_172296 | Dmrta2        | 0 | 1 | -1.62311   | 0.212839  | 0.0487214 | No change |
| NM_172306 | Cyp4a12b      | 0 | 1 | -1.47111   | 0.145497  | 0.0299754 | No change |
| NM_172309 | Arntl2        | 0 | 1 | -0.0381483 | 0.360481  | 0.330073  | No change |
| NM_172338 | Dnajc16       | 0 | 1 | -0.0431543 | 7.40922   | 6.84335   | No change |
| NM_172391 | Ahsa2         | 0 | 1 | -0.0778266 | 20.6526   | 18.625    | No change |
| NM_172399 | A930038C07Rik | 0 | 1 | -0.208073  | 0.0595157 | 0.0459806 | No change |
| NM_172403 | 2810021J22Rik | 0 | 1 | 0.166535   | 3.43336   | 3.66879   | No change |
| NM_172409 | Fmnl2         | 0 | 1 | 0.21416    | 1.477     | 1.63189   | No change |
| NM_172410 | Nup93         | 0 | 1 | -0.0776263 | 4.18919   | 3.77589   | No change |
| NM_172417 | 2310042D19Rik | 0 | 1 | -0.251795  | 1.19722   | 0.952978  | No change |
| NM_172418 | Mamstr        | 0 | 1 | 0.544489   | 0.703646  | 0.988403  | No change |
| NM_172419 | 9030612E09Rik | 0 | 1 | 0.113855   | 0.0374895 | 0.0386181 | No change |
| NM_172421 | Asxl2         | 0 | 1 | -0.0964565 | 9.50001   | 8.45743   | No change |
| NM_172435 | P2ry10        | 0 | 1 | 1.28378    | 0.172568  | 0.431711  | No change |
| NM_172437 | Pus7l         | 0 | 1 | -0.244599  | 1.19907   | 0.957885  | No change |
| NM_172439 | Inpp5j        | 0 | 1 | -1.00162   | 0.501677  | 0.227383  | No change |
| NM_172443 | Tbc1d16       | 0 | 1 | 0.28378    | 1.42617   | 1.65403   | No change |
| NM_172449 | Bzrap1        | 0 | 1 | -0.118806  | 0.85103   | 0.744681  | No change |
| NM_172453 | Pif1          | 0 | 1 | -1.76061   | 0.189383  | 0.0390168 | No change |
| NM_172454 | Panx3         | 0 | 1 | -2.6935    | 0.166067  | 0         | No change |
| NM_172455 | Tmprss7       | 0 | 1 | -0.886145  | 0.404408  | 0.194405  | No change |
| NM_172457 | Mobkl2a       | 0 | 1 | -0.146146  | 7.47744   | 6.42783   | No change |
| NM_172462 | Zfp11         | 0 | 1 | -0.0466099 | 1.33477   | 1.22829   | No change |
| NM_172465 | Zdhhc9        | 0 | 1 | 0.356425   | 1.62888   | 1.98953   | No change |
| NM_172466 | Adamts18      | 0 | 1 | 1.11385    | 0         | 0.014787  | No change |
| NM_172467 | Zc3hav1l      | 0 | 1 | 0.34832    | 0.532984  | 0.647854  | No change |
| NM_172469 | Clic6         | 0 | 1 | -0.0925961 | 2.21573   | 1.97555   | No change |
| NM_172473 | Hace1         | 0 | 1 | -0.0426497 | 1.95177   | 1.80189   | No change |
| NM_172477 | Dennd2a       | 0 | 1 | -0.154962  | 1.55572   | 1.32736   | No change |
| NM_172481 | Nlrp4b        | 0 | 1 | 0.113855   | 0         | 0         | No change |
| NM_172486 | Zfp677        | 0 | 1 | -0.0370871 | 3.58995   | 3.32822   | No change |
| NM_172487 | Prrt3         | 0 | 1 | -0.538222  | 0.210935  | 0.130371  | No change |
| NM_172493 | Diap2         | 0 | 1 | 0.0812869  | 1.84119   | 1.8541    | No change |
| NM_172495 | Ncoa7         | 0 | 1 | 0.00210645 | 4.38054   | 4.17504   | No change |
| NM_172499 | Mfsd9         | 0 | 1 | 0.0878596  | 3.69249   | 3.73532   | No change |
| NM_172506 | Boc           | 0 | 1 | 0.253741   | 4.31253   | 4.89631   | No change |
| NM_172508 | Dse           | 0 | 1 | 0.0447305  | 2.80421   | 2.7527    | No change |
| NM_172511 | Abhd10        | 0 | 1 | -0.159164  | 5.66849   | 4.82657   | No change |
| NM_172514 | Tmem71        | 0 | 1 | -0.471108  | 0.261557  | 0.171456  | No change |

|           |               |   |   |            |           |           |           |
|-----------|---------------|---|---|------------|-----------|-----------|-----------|
| NM_172518 | Fbxo42        | 0 | 1 | -0.238967  | 3.45818   | 2.78682   | No change |
| NM_172520 | Arhgef19      | 0 | 1 | 0.988324   | 0.225676  | 0.443806  | No change |
| NM_172523 | Slc18a2       | 0 | 1 | 0.224279   | 1.59434   | 1.77448   | No change |
| NM_172527 | Nudt15        | 0 | 1 | 0.0604156  | 1.45194   | 1.44025   | No change |
| NM_172530 | She           | 0 | 1 | 0.342124   | 0.412456  | 0.49985   | No change |
| NM_172534 | 4932411E22Rik | 0 | 1 | -0.623111  | 1.54292   | 0.942846  | No change |
| NM_172537 | Sema6d        | 0 | 1 | 0.248784   | 0.551717  | 0.625159  | No change |
| NM_172539 | Astl          | 0 | 1 | 0.113855   | 0         | 0         | No change |
| NM_172543 | Fam117a       | 0 | 1 | 0.0883197  | 5.11342   | 5.1744    | No change |
| NM_172546 | Cnksr3        | 0 | 1 | -0.301183  | 1.67764   | 1.2909    | No change |
| NM_172549 | Cabin1        | 0 | 1 | 0.0944374  | 6.97864   | 7.09249   | No change |
| NM_172551 | Polrmt        | 0 | 1 | -0.135621  | 4.29792   | 3.72122   | No change |
| NM_172564 | Tns4          | 0 | 1 | 0.435783   | 0.337106  | 0.437842  | No change |
| NM_172565 | Kihl11        | 0 | 1 | 0.155932   | 18.3387   | 19.4508   | No change |
| NM_172567 | Mettl2        | 0 | 1 | 0.0558492  | 5.37532   | 5.31785   | No change |
| NM_172573 | Engase        | 0 | 1 | 0.466736   | 1.45712   | 1.92199   | No change |
| NM_172590 | Wdr41         | 0 | 1 | 0.267012   | 5.66554   | 6.49236   | No change |
| NM_172599 | Atg14         | 0 | 1 | 0.247308   | 4.56407   | 5.15913   | No change |
| NM_172601 | Rab2b         | 0 | 1 | -0.329197  | 5.23456   | 3.95944   | No change |
| NM_172603 | Phf11         | 0 | 1 | -0.175652  | 0.514719  | 0.424171  | No change |
| NM_172604 | Scara3        | 0 | 1 | 0.236866   | 3.88889   | 4.36439   | No change |
| NM_172607 | Naprt1        | 0 | 1 | 0.670248   | 1.21686   | 1.86125   | No change |
| NM_172608 | Tmem184b      | 0 | 1 | 0.383315   | 2.30167   | 2.86224   | No change |
| NM_172612 | Rnd1          | 0 | 1 | -0.760614  | 0.316355  | 0.162939  | No change |
| NM_172614 | Tmem44        | 0 | 1 | 0.417247   | 0.755924  | 0.964887  | No change |
| NM_172617 | Zfp523        | 0 | 1 | 0.094226   | 7.58091   | 7.70323   | No change |
| NM_172619 | Adamts10      | 0 | 1 | 0.215393   | 1.62874   | 1.8014    | No change |
| NM_172620 | Vps52         | 0 | 1 | -0.0482507 | 5.19044   | 4.77568   | No change |
| NM_172621 | Clic5         | 0 | 1 | -0.075623  | 0.759855  | 0.684888  | No change |
| NM_172632 | Mapk4         | 0 | 1 | -0.471108  | 0.528778  | 0.357943  | No change |
| NM_172633 | Cbln2         | 0 | 1 | 0.113855   | 0.0316642 | 0.0326174 | No change |
| NM_172635 | Pat11         | 0 | 1 | 0.380959   | 1.93179   | 2.39813   | No change |
| NM_172639 | Dpcd          | 0 | 1 | -0.348772  | 5.76911   | 4.29791   | No change |
| NM_172644 | Dars2         | 0 | 1 | 0.336247   | 3.48367   | 4.18998   | No change |
| NM_172648 | Ifi205        | 0 | 1 | -0.0381483 | 2.11714   | 1.95834   | No change |
| NM_172663 | Epc2          | 0 | 1 | 0.132591   | 7.32432   | 7.64365   | No change |
| NM_172667 | Cwc22         | 0 | 1 | 0.308176   | 4.4256    | 5.21922   | No change |
| NM_172673 | Frmd5         | 0 | 1 | 0.208492   | 0.962426  | 1.05977   | No change |
| NM_172676 | Samd10        | 0 | 1 | 0.0956157  | 13.1878   | 13.4138   | No change |
| NM_172687 | Coq3          | 0 | 1 | 0.366836   | 3.17392   | 3.90138   | No change |
| NM_172690 | N28178        | 0 | 1 | -0.208073  | 0.595666  | 0.486647  | No change |
| NM_172694 | Megf9         | 0 | 1 | 0.0903958  | 4.21071   | 4.26713   | No change |
| NM_172697 | Prpf38a       | 0 | 1 | -0.185112  | 25.6932   | 21.5042   | No change |
| NM_172706 | 9330182L06Rik | 0 | 1 | 0.45089    | 0.557303  | 0.729236  | No change |
| NM_172709 | Otop1         | 0 | 1 | -2.05607   | 0.176942  | 0.0227836 | No change |
| NM_172712 | Uba6          | 0 | 1 | 0.10575    | 9.76633   | 10.0039   | No change |
| NM_172728 | Creb5         | 0 | 1 | 0.92121    | 0.169805  | 0.324846  | No change |
| NM_172731 | Fgd5          | 0 | 1 | 0.231212   | 0.718995  | 0.804488  | No change |
| NM_172734 | Stk38l        | 0 | 1 | 0.235845   | 3.57748   | 4.01171   | No change |
| NM_172736 | Leng8         | 0 | 1 | 0.03509    | 24.4486   | 23.8458   | No change |
| NM_172743 | Plekha7       | 0 | 1 | 0.334882   | 2.42438   | 2.91359   | No change |
| NM_172750 | Adprhl1       | 0 | 1 | -1.47111   | 0.102114  | 0         | No change |
| NM_172756 | Ankle1        | 0 | 1 | 1.36178    | 0.228609  | 0.605547  | No change |
| NM_172760 | Elmo3         | 0 | 1 | 0.0738567  | 5.80774   | 5.81835   | No change |
| NM_172766 | Nfrkb         | 0 | 1 | 0.148773   | 6.04969   | 6.38482   | No change |
| NM_172771 | Dmxl2         | 0 | 1 | 0.0911693  | 13.0403   | 13.2232   | No change |
| NM_172774 | Atrip         | 0 | 1 | 0.183865   | 4.87742   | 5.27546   | No change |
| NM_172775 | Plxnb1        | 0 | 1 | 0.158249   | 1.80715   | 1.91999   | No change |
| NM_172776 | D630002G06Rik | 0 | 1 | -0.886145  | 0.157819  | 0.0650281 | No change |
| NM_172777 | Gbp9          | 0 | 1 | 0.308671   | 3.16524   | 3.73479   | No change |
| NM_172781 | Kihl4         | 0 | 1 | 0.454892   | 0.298745  | 0.395664  | No change |
| NM_172784 | Lrp11         | 0 | 1 | -0.347725  | 1.70283   | 1.26802   | No change |
| NM_172785 | Zc3h12d       | 0 | 1 | 0.599282   | 0.57893   | 0.841917  | No change |
| NM_172791 | Pla2g3        | 0 | 1 | -0.663753  | 0.611108  | 0.355807  | No change |
| NM_172793 | Btnl9         | 0 | 1 | 1.69882    | 0.028296  | 0.145739  | No change |
| NM_172794 | Zfp454        | 0 | 1 | 0.512404   | 0.711844  | 0.977698  | No change |
| NM_172796 | Sifn9         | 0 | 1 | 0.113855   | 0.542217  | 0.55854   | No change |
| NM_172800 | Sdk2          | 0 | 1 | 0.179818   | 1.79403   | 1.93501   | No change |
| NM_172804 | Syt16         | 0 | 1 | -0.248715  | 0.206116  | 0.159241  | No change |
| NM_172805 | Kcnh5         | 0 | 1 | 1.11385    | 0         | 0.0176782 | No change |
| NM_172807 | Ppww1         | 0 | 1 | -0.0513676 | 7.86476   | 7.22158   | No change |
| NM_172812 | Htr2a         | 0 | 1 | -0.0236487 | 0.234577  | 0.217475  | No change |
| NM_172815 | Rspo2         | 0 | 1 | 0.3065     | 0.125197  | 0.15046   | No change |
| NM_172816 | Slc30a8       | 0 | 1 | 0.113855   | 0         | 0         | No change |
| NM_172822 | Pigz          | 0 | 1 | -0.0236487 | 0.319107  | 0.295842  | No change |
| NM_172825 | Gpr128        | 0 | 1 | 0.509783   | 0.954698  | 1.30239   | No change |

|           |               |   |   |            |           |           |           |
|-----------|---------------|---|---|------------|-----------|-----------|-----------|
| NM_172829 | St6gal2       | 0 | 1 | 0.113855   | 0         | 0         | No change |
| NM_172831 | E230025N22Rik | 0 | 1 | -0.886145  | 0.0345699 | 0         | No change |
| NM_172832 | Pcyox1l       | 0 | 1 | 0.293561   | 3.35162   | 3.91522   | No change |
| NM_172833 | Malt1         | 0 | 1 | 0.264414   | 4.16098   | 4.75931   | No change |
| NM_172835 | Peli3         | 0 | 1 | 0.113855   | 0.935476  | 0.963637  | No change |
| NM_172839 | Ccnj          | 0 | 1 | 0.237237   | 1.00422   | 1.12849   | No change |
| NM_172841 | Slco5a1       | 0 | 1 | -0.663753  | 0.384863  | 0.227747  | No change |
| NM_172843 | Tor1aip2      | 0 | 1 | -0.0553879 | 12.5697   | 11.5135   | No change |
| NM_172844 | Fmo9          | 0 | 1 | -0.886145  | 0.0227383 | 0         | No change |
| NM_172845 | Adamts4       | 0 | 1 | -0.886145  | 0.208718  | 0.097728  | No change |
| NM_172849 | 9430031J16Rik | 0 | 1 | 0.698817   | 0.0142057 | 0.0292666 | No change |
| NM_172852 | Serpnb13      | 0 | 1 | 0.113855   | 0         | 0         | No change |
| NM_172853 | Cdh7          | 0 | 1 | 0.113855   | 0         | 0         | No change |
| NM_172854 | Olfml2a       | 0 | 1 | -0.192807  | 1.33079   | 1.10264   | No change |
| NM_172855 | Galnt5        | 0 | 1 | 0.85082    | 0.0429276 | 0.0884398 | No change |
| NM_172858 | Pak7          | 0 | 1 | 0.698817   | 0.39424   | 0.616683  | No change |
| NM_172859 | 6330439K17Rik | 0 | 1 | -0.290343  | 2.24454   | 1.74459   | No change |
| NM_172862 | Frem2         | 0 | 1 | 0.386108   | 0.728085  | 0.90698   | No change |
| NM_172866 | Rgp1          | 0 | 1 | 0.0716023  | 6.98355   | 6.9858    | No change |
| NM_172867 | Zfp462        | 0 | 1 | -0.168039  | 1.52719   | 1.29273   | No change |
| NM_172868 | Palm2         | 0 | 1 | -0.301183  | 0.331669  | 0.25405   | No change |
| NM_172872 | Kank4         | 0 | 1 | 0.499509   | 0.885497  | 1.19627   | No change |
| NM_172873 | Cdcp2         | 0 | 1 | 1.69882    | 0         | 0.0549912 | No change |
| NM_172874 | Podn          | 0 | 1 | 0.48825    | 0.571975  | 0.770484  | No change |
| NM_172876 | Gpatch3       | 0 | 1 | -0.484783  | 1.8093    | 1.21862   | No change |
| NM_172880 | Tmprss11e     | 0 | 1 | -0.471108  | 0.0408996 | 0.0210654 | No change |
| NM_172881 | Ugt2b35       | 0 | 1 | 0.113855   | 0         | 0         | No change |
| NM_172884 | 2900026A02Rik | 0 | 1 | 0.313164   | 2.24431   | 2.65619   | No change |
| NM_172885 | Tmem132d      | 0 | 1 | -1.47111   | 0.081455  | 0.0167814 | No change |
| NM_172887 | Fry           | 0 | 1 | -0.276292  | 1.6108    | 1.26454   | No change |
| NM_172888 | Svs1          | 0 | 1 | 0.528892   | 0.050193  | 0.077556  | No change |
| NM_172896 | Nlrp4a        | 0 | 1 | -0.886145  | 0.0194945 | 0         | No change |
| NM_172898 | Kirrel2       | 0 | 1 | -0.886145  | 0.0223232 | 0         | No change |
| NM_172900 | Siglecg       | 0 | 1 | 0.113855   | 0.0280567 | 0.0289014 | No change |
| NM_172905 | E030002O03Rik | 0 | 1 | -0.886145  | 0.0309334 | 0         | No change |
| NM_172907 | Olfml1        | 0 | 1 | 0.449904   | 2.12371   | 2.77101   | No change |
| NM_172909 | Cd16311       | 0 | 1 | -0.886145  | 0.100887  | 0.0415698 | No change |
| NM_172919 | Zfp846        | 0 | 1 | -0.304647  | 3.49097   | 2.68402   | No change |
| NM_172922 | Ankk1         | 0 | 1 | -1.20807   | 0.233521  | 0.0801835 | No change |
| NM_172923 | Al118078      | 0 | 1 | -0.108538  | 0.173726  | 0.14913   | No change |
| NM_172925 | Klhl31        | 0 | 1 | 0.551976   | 0.334152  | 0.470422  | No change |
| NM_172931 | Hsf1          | 0 | 1 | -0.471108  | 0.0706825 | 0.0364052 | No change |
| NM_172932 | Nlgn3         | 0 | 1 | 0.85082    | 0.0359149 | 0.0739922 | No change |
| NM_172939 | Ankrd57       | 0 | 1 | 0.214941   | 3.81519   | 4.21645   | No change |
| NM_172945 | Ankrd13b      | 0 | 1 | 0.0524543  | 0.480497  | 0.473442  | No change |
| NM_172946 | Krt222        | 0 | 1 | -0.886145  | 0.280301  | 0.131245  | No change |
| NM_172947 | Lsm12         | 0 | 1 | -0.288244  | 12.5834   | 9.79501   | No change |
| NM_172951 | Sntg2         | 0 | 1 | 0.424195   | 0.715717  | 0.921579  | No change |
| NM_172964 | Arhgap28      | 0 | 1 | 0.135714   | 1.70463   | 1.78296   | No change |
| NM_172974 | Cops7b        | 0 | 1 | -0.157107  | 4.52957   | 3.86146   | No change |
| NM_172980 | Slc28a2       | 0 | 1 | 0.113855   | 0.232072  | 0.239058  | No change |
| NM_172987 | Nkain3        | 0 | 1 | 1.11385    | 0.0482471 | 0.124249  | No change |
| NM_172990 | Pank4         | 0 | 1 | 0.113855   | 3.8039    | 3.91842   | No change |
| NM_172991 | C030048B08Rik | 0 | 1 | 0.100308   | 6.37107   | 6.50124   | No change |
| NM_172992 | Phtf2         | 0 | 1 | 0.108049   | 3.57178   | 3.66447   | No change |
| NM_172994 | Ppp2r2c       | 0 | 1 | 0.196317   | 0.570545  | 0.62334   | No change |
| NM_173008 | A430110N23Rik | 0 | 1 | 0.616355   | 0.572595  | 0.842617  | No change |
| NM_173013 | Mtap1s        | 0 | 1 | -0.478487  | 2.06482   | 1.40337   | No change |
| NM_173016 | Vat1l         | 0 | 1 | -1.47111   | 0.26695   | 0.0785674 | No change |
| NM_173022 | BC048403      | 0 | 1 | 0.461778   | 0.961436  | 1.26676   | No change |
| NM_173026 | Zbtb11        | 0 | 1 | 0.00182819 | 7.26491   | 6.92342   | No change |
| NM_173027 | Ip6k3         | 0 | 1 | -1.47111   | 0.151178  | 0.0311458 | No change |
| NM_173030 | Galnt13       | 0 | 1 | 0.68322    | 0.300142  | 0.463766  | No change |
| NM_173036 | Gpr97         | 0 | 1 | -0.108538  | 0.371619  | 0.323913  | No change |
| NM_173048 | Gga3          | 0 | 1 | 0.00817673 | 5.08791   | 4.8695    | No change |
| NM_173051 | Serpnb1c      | 0 | 1 | 0.113855   | 0         | 0         | No change |
| NM_173070 | Sprr4         | 0 | 1 | 0.113855   | 0         | 0         | No change |
| NM_173180 | Pmpca         | 0 | 1 | -0.115561  | 16.8155   | 14.7717   | No change |
| NM_173184 | Rln3          | 0 | 1 | 1.11385    | 0         | 0.151139  | No change |
| NM_173347 | Prune         | 0 | 1 | -0.245688  | 9.03345   | 7.24769   | No change |
| NM_173365 | Gpr20         | 0 | 1 | 0.113855   | 0.423171  | 0.43591   | No change |
| NM_173372 | Grm6          | 0 | 1 | -2.47111   | 0.0804397 | 0         | No change |
| NM_173375 | Fam180a       | 0 | 1 | -0.175652  | 0.456106  | 0.375869  | No change |
| NM_173376 | Rbmx2         | 0 | 1 | 0.684171   | 1.2795    | 1.97703   | No change |
| NM_173377 | Svs3b         | 0 | 1 | -1.47111   | 0.111331  | 0         | No change |
| NM_173379 | Leprel1       | 0 | 1 | 0.499145   | 1.48811   | 2.01194   | No change |

|           |                |   |   |            |           |           |           |
|-----------|----------------|---|---|------------|-----------|-----------|-----------|
| NM_173381 | 6720489N17Rik  | 0 | 1 | 0.500878   | 0.317026  | 0.435427  | No change |
| NM_173382 | 2810046L04Rik  | 0 | 1 | 0.353042   | 0.967733  | 1.17962   | No change |
| NM_173383 | Dnd1           | 0 | 1 | -0.709267  | 2.13491   | 1.22177   | No change |
| NM_173387 | Zfp879         | 0 | 1 | -0.670416  | 0.868268  | 0.50683   | No change |
| NM_173391 | Tph2           | 0 | 1 | -2.6935    | 0.159237  | 0         | No change |
| NM_173392 | Zfyve16        | 0 | 1 | 0.0361951  | 11.9415   | 11.6557   | No change |
| NM_173393 | Xkr6           | 0 | 1 | -0.886145  | 0.961471  | 0.481059  | No change |
| NM_173394 | Ticam2         | 0 | 1 | -0.523575  | 0.277576  | 0.175958  | No change |
| NM_173395 | Fam132b        | 0 | 1 | 0.639924   | 0.594185  | 0.892605  | No change |
| NM_173398 | Gpr171         | 0 | 1 | 0.251358   | 1.22158   | 1.38742   | No change |
| NM_173403 | Slc10a4        | 0 | 1 | 0.113855   | 0         | 0         | No change |
| NM_173405 | Amz1           | 0 | 1 | -0.0925961 | 0.36339   | 0.320854  | No change |
| NM_173410 | Gpr26          | 0 | 1 | 0.113855   | 0         | 0         | No change |
| NM_173411 | BC030500       | 0 | 1 | 0.113855   | 0         | 0         | No change |
| NM_173414 | Lanc13         | 0 | 1 | -0.153626  | 1.13784   | 0.970643  | No change |
| NM_173418 | Lrit2          | 0 | 1 | -0.886145  | 0.0250604 | 0         | No change |
| NM_173419 | Dleu7          | 0 | 1 | 0.435783   | 0.156966  | 0.215589  | No change |
| NM_173420 | D930020E02Rik  | 0 | 1 | -0.471108  | 0.0464465 | 0.0239223 | No change |
| NM_173422 | Colec10        | 0 | 1 | -0.886145  | 0.0151936 | 0         | No change |
| NM_173424 | Zbtb37         | 0 | 1 | 0.226983   | 5.92291   | 6.60041   | No change |
| NM_173434 | 9930111J21Rik2 | 0 | 1 | 0.0289659  | 3.01626   | 2.9278    | No change |
| NM_173437 | Nav1           | 0 | 1 | 0.0503519  | 1.13544   | 1.11901   | No change |
| NM_173439 | Fbxo45         | 0 | 1 | 0.271396   | 4.90917   | 5.64249   | No change |
| NM_173446 | Fam155a        | 0 | 1 | -0.886145  | 0.0221811 | 0         | No change |
| NM_173450 | Rpusd2         | 0 | 1 | -0.480889  | 0.990959  | 0.671205  | No change |
| NM_173451 | Arjsj          | 0 | 1 | 0.765932   | 0.113322  | 0.194555  | No change |
| NM_173731 | Hmgcl1         | 0 | 1 | -1.37157   | 0.250625  | 0.0794368 | No change |
| NM_173735 | 2310044G17Rik  | 0 | 1 | -0.0318449 | 13.7856   | 12.8348   | No change |
| NM_173737 | 8430410A17Rik  | 0 | 1 | 0.327562   | 5.84489   | 6.99031   | No change |
| NM_173756 | Lin52          | 0 | 1 | -0.201019  | 8.25653   | 6.83086   | No change |
| NM_173757 | Mrps27         | 0 | 1 | 0.0979133  | 3.39414   | 3.45747   | No change |
| NM_173763 | Ccbl2          | 0 | 1 | 0.612661   | 1.39634   | 2.04569   | No change |
| NM_173767 | Insc           | 0 | 1 | -2.6935    | 0.180163  | 0         | No change |
| NM_173769 | Zfp641         | 0 | 1 | -0.438686  | 0.815899  | 0.566822  | No change |
| NM_173770 | Fam69c         | 0 | 1 | 0.528892   | 0.0647403 | 0.100034  | No change |
| NM_173772 | Neu4           | 0 | 1 | 1.11385    | 0         | 0.0159288 | No change |
| NM_173773 | Oog4           | 0 | 1 | 0.113855   | 0         | 0         | No change |
| NM_173777 | Olfm2          | 0 | 1 | -0.0236487 | 0.457003  | 0.423684  | No change |
| NM_173780 | Klf8           | 0 | 1 | 0.153383   | 0.547286  | 0.579869  | No change |
| NM_173788 | Npr2           | 0 | 1 | 0.35778    | 0.705317  | 0.864005  | No change |
| NM_173862 | Fam83a         | 0 | 1 | -1.37157   | 0.434536  | 0.137728  | No change |
| NM_173863 | Crtc3          | 0 | 1 | -0.310898  | 2.0185    | 1.5454    | No change |
| NM_173868 | St18           | 0 | 1 | 0.113855   | 0.0951115 | 0.0979747 | No change |
| NM_173869 | Stfa211        | 0 | 1 | 0.698817   | 0.16834   | 0.346816  | No change |
| NM_174850 | Micall2        | 0 | 1 | 0.157356   | 2.02039   | 2.14558   | No change |
| NM_174852 | Phf12          | 0 | 1 | 0.228948   | 4.57003   | 5.09991   | No change |
| NM_174857 | Mamdc2         | 0 | 1 | -0.324266  | 0.856025  | 0.645215  | No change |
| NM_174865 | Klk15          | 0 | 1 | -1.47111   | 0.182204  | 0         | No change |
| NM_174866 | Klk14          | 0 | 1 | 0.113855   | 0         | 0         | No change |
| NM_174874 | Atg4b          | 0 | 1 | 0.0567109  | 7.24205   | 7.16941   | No change |
| NM_174876 | Impg2          | 0 | 1 | -0.208073  | 0.746134  | 0.612799  | No change |
| NM_174877 | Zar1           | 0 | 1 | 0.113855   | 0         | 0         | No change |
| NM_174985 | Gpbar1         | 0 | 1 | -0.0116761 | 0.774366  | 0.725161  | No change |
| NM_174987 | 1810063B05Rik  | 0 | 1 | -0.108538  | 8.86005   | 7.8095    | No change |
| NM_174988 | Cdh22          | 0 | 1 | 0.113855   | 0         | 0         | No change |
| NM_174990 | Gimap4         | 0 | 1 | 0.260696   | 3.19586   | 3.64904   | No change |
| NM_174991 | Bai1           | 0 | 1 | -0.610511  | 0.414106  | 0.253638  | No change |
| NM_175000 | Hbq1a          | 0 | 1 | 0.113855   | 0.461543  | 0.475437  | No change |
| NM_175001 | Mrpl22         | 0 | 1 | 0.0841075  | 9.08631   | 9.16686   | No change |
| NM_175006 | Pou6f2         | 0 | 1 | -1.88615   | 0.230881  | 0.0339759 | No change |
| NM_175011 | E330017A01Rik  | 0 | 1 | 0.113855   | 0         | 0         | No change |
| NM_175012 | Grp            | 0 | 1 | 1.11385    | 0.0807566 | 0.249563  | No change |
| NM_175022 | Prr12          | 0 | 1 | 0.328449   | 1.06378   | 1.27322   | No change |
| NM_175024 | Nrn11          | 0 | 1 | -0.564217  | 0.805034  | 0.473868  | No change |
| NM_175030 | Tctex1d4       | 0 | 1 | 0.399257   | 2.20008   | 2.77806   | No change |
| NM_175035 | Gimap5         | 0 | 1 | -0.564217  | 0.824981  | 0.517279  | No change |
| NM_175087 | Aqp6           | 0 | 1 | -0.564217  | 1.04878   | 0.66215   | No change |
| NM_175088 | Mdfic          | 0 | 1 | 0.322802   | 3.10423   | 3.69927   | No change |
| NM_175092 | Rhof           | 0 | 1 | 0.170438   | 0.780509  | 0.837506  | No change |
| NM_175093 | Trib3          | 0 | 1 | -0.0381483 | 0.30582   | 0.280023  | No change |
| NM_175096 | Stbd1          | 0 | 1 | -0.0771935 | 4.49405   | 4.05067   | No change |
| NM_175101 | Tmem111        | 0 | 1 | 0.146942   | 29.1158   | 30.689    | No change |
| NM_175103 | Bola2          | 0 | 1 | 0.338286   | 20.6804   | 24.9245   | No change |
| NM_175112 | Rae1           | 0 | 1 | 0.0867187  | 6.40119   | 6.47025   | No change |
| NM_175114 | Trak1          | 0 | 1 | 0.212345   | 5.23589   | 5.77561   | No change |
| NM_175126 | Zcchc3         | 0 | 1 | 0.374244   | 2.03055   | 2.51001   | No change |

|           |               |   |   |             |           |           |           |
|-----------|---------------|---|---|-------------|-----------|-----------|-----------|
| NM_175127 | Fbxo28        | 0 | 1 | 0.177334    | 8.18498   | 8.81131   | No change |
| NM_175132 | Synpo2l       | 0 | 1 | 0.765932    | 0.106618  | 0.183047  | No change |
| NM_175136 | Rnf122        | 0 | 1 | 0.3065      | 0.255429  | 0.303599  | No change |
| NM_175137 | Vars2         | 0 | 1 | 0.0472571   | 2.07945   | 2.04468   | No change |
| NM_175140 | Chst8         | 0 | 1 | 0.113855    | 0.0290751 | 0.0299503 | No change |
| NM_175145 | Tmem127       | 0 | 1 | -0.026548   | 16.5483   | 15.4642   | No change |
| NM_175148 | 2300002M23Rik | 0 | 1 | 0.113855    | 0.167531  | 0.172574  | No change |
| NM_175149 | 2310022B05Rik | 0 | 1 | 0.172748    | 3.01363   | 3.23461   | No change |
| NM_175151 | Tatdn1        | 0 | 1 | 0.326849    | 6.68358   | 7.98845   | No change |
| NM_175154 | Galk2         | 0 | 1 | 0.217963    | 12.1686   | 13.4751   | No change |
| NM_175164 | Arhgap26      | 0 | 1 | 0.14687     | 1.89695   | 1.9995    | No change |
| NM_175165 | Tprg          | 0 | 1 | 0.113855    | 0.25717   | 0.264911  | No change |
| NM_175166 | 5430419D17Rik | 0 | 1 | -0.886145   | 0.0238022 | 0         | No change |
| NM_175171 | Mast4         | 0 | 1 | -0.0709544  | 2.22077   | 2.01176   | No change |
| NM_175174 | Klh5          | 0 | 1 | -0.0387443  | 5.48055   | 5.07677   | No change |
| NM_175175 | Plekhf2       | 0 | 1 | -0.114414   | 9.76178   | 8.5805    | No change |
| NM_175178 | Aifm3         | 0 | 1 | -0.819031   | 0.524599  | 0.270196  | No change |
| NM_175183 | Atxn7l2       | 0 | 1 | -0.16032    | 1.18045   | 1.0014    | No change |
| NM_175191 | Gpr22         | 0 | 1 | 0.370195    | 1.07874   | 1.33033   | No change |
| NM_175204 | Psemb11       | 0 | 1 | -2.20807    | 0.0656397 | 0         | No change |
| NM_175206 | Fbxl22        | 0 | 1 | -0.243302   | 2.00135   | 1.60549   | No change |
| NM_175213 | Mei4          | 0 | 1 | -1.6935     | 0.136608  | 0.0234534 | No change |
| NM_175228 | 4930578C19Rik | 0 | 1 | 0.85082     | 0.309919  | 0.558685  | No change |
| NM_175234 | 6230409E13Rik | 0 | 1 | -0.00398168 | 0.373009  | 0.353499  | No change |
| NM_175247 | Zfp28         | 0 | 1 | -0.320241   | 2.11802   | 1.61036   | No change |
| NM_175249 | Psap11        | 0 | 1 | 0.698817    | 0.136814  | 0.225492  | No change |
| NM_175256 | Heg1          | 0 | 1 | -0.236938   | 5.32174   | 4.29544   | No change |
| NM_175259 | Shisa4        | 0 | 1 | 1.49237     | 0.527089  | 1.50821   | No change |
| NM_175263 | Notum         | 0 | 1 | 0.528892    | 0.276148  | 0.391135  | No change |
| NM_175268 | Fam53b        | 0 | 1 | -0.308272   | 3.72667   | 2.86144   | No change |
| NM_175270 | Ankrd56       | 0 | 1 | 0.741886    | 0.1787    | 0.294527  | No change |
| NM_175271 | Lpar4         | 0 | 1 | 1.52889     | 0.0328973 | 0.118607  | No change |
| NM_175284 | Fzd10         | 0 | 1 | 0.113855    | 0.186594  | 0.192211  | No change |
| NM_175293 | D630023F18Rik | 0 | 1 | -0.886145   | 0.0319692 | 0         | No change |
| NM_175300 | Anapc2        | 0 | 1 | -0.0815409  | 6.90692   | 6.21062   | No change |
| NM_175303 | Sall4         | 0 | 1 | -1.56422    | 0.20607   | 0.0566063 | No change |
| NM_175305 | Lrrc19        | 0 | 1 | -0.201019   | 1.25663   | 1.03557   | No change |
| NM_175309 | Upk3b         | 0 | 1 | 0.113855    | 0.171152  | 0.176304  | No change |
| NM_175310 | Pds5b         | 0 | 1 | -0.07742    | 4.29085   | 3.86997   | No change |
| NM_175315 | Ceacam15      | 0 | 1 | 0.113855    | 0         | 0         | No change |
| NM_175325 | Bbs4          | 0 | 1 | -0.0729137  | 11.4875   | 10.393    | No change |
| NM_175327 | B630019K06Rik | 0 | 1 | 0.755401    | 0.637193  | 1.03926   | No change |
| NM_175332 | E130012A19Rik | 0 | 1 | 0.528892    | 0.0598223 | 0.0924347 | No change |
| NM_175342 | Cphx          | 0 | 1 | 1.11385     | 0.126484  | 0.304015  | No change |
| NM_175362 | Card11        | 0 | 1 | -0.191      | 0.338973  | 0.279342  | No change |
| NM_175369 | Ccdc122       | 0 | 1 | 0.113855    | 2.30825   | 2.37774   | No change |
| NM_175382 | Fam72a        | 0 | 1 | -0.273168   | 0.529733  | 0.40926   | No change |
| NM_175383 | B3gnt1        | 0 | 1 | 0.0333649   | 4.38363   | 4.26865   | No change |
| NM_175386 | Lhfp          | 0 | 1 | -0.122751   | 3.9367    | 3.43662   | No change |
| NM_175397 | Sp110         | 0 | 1 | -0.388646   | 1.18611   | 0.851569  | No change |
| NM_175399 | Exosc4        | 0 | 1 | 0.0488994   | 6.15511   | 6.0595    | No change |
| NM_175401 | Fbxw17        | 0 | 1 | -0.6935     | 1.8741    | 1.08591   | No change |
| NM_175402 | Rbm15b        | 0 | 1 | 0.238636    | 7.39448   | 8.30738   | No change |
| NM_175423 | Orai1         | 0 | 1 | -0.220564   | 6.44408   | 5.25674   | No change |
| NM_175427 | Fam163b       | 0 | 1 | -2.20807    | 0.0946272 | 0         | No change |
| NM_175431 | A830093l24Rik | 0 | 1 | -0.224561   | 5.28855   | 4.30348   | No change |
| NM_175434 | Slc35f3       | 0 | 1 | 0.251358    | 0.225381  | 0.257963  | No change |
| NM_175440 | Prss27        | 0 | 1 | -1.88615    | 0.181966  | 0         | No change |
| NM_175441 | Mylk3         | 0 | 1 | -0.65168    | 0.363221  | 0.210462  | No change |
| NM_175448 | Clvs2         | 0 | 1 | -1.88615    | 0.0836315 | 0         | No change |
| NM_175449 | Fam26f        | 0 | 1 | 0.467492    | 1.09499   | 1.45971   | No change |
| NM_175450 | Wdr18         | 0 | 1 | -0.234522   | 6.79471   | 5.49247   | No change |
| NM_175454 | C630004H02Rik | 0 | 1 | -0.139902   | 0.645903  | 0.554456  | No change |
| NM_175456 | Abra          | 0 | 1 | 1.11385     | 0.11866   | 0.285208  | No change |
| NM_175459 | Glis3         | 0 | 1 | 0.207977    | 1.56573   | 1.72284   | No change |
| NM_175466 | Zfp770        | 0 | 1 | -0.199303   | 3.33506   | 2.76184   | No change |
| NM_175472 | Zcchc11       | 0 | 1 | -0.0563489  | 7.43668   | 6.80674   | No change |
| NM_175478 | Lrfr3         | 0 | 1 | 0.229332    | 0.267956  | 0.301116  | No change |
| NM_175480 | Zfp612        | 0 | 1 | 0.175977    | 7.09441   | 7.63017   | No change |
| NM_175481 | Grik4         | 0 | 1 | 0.546814    | 0.77925   | 1.09086   | No change |
| NM_175483 | Snx33         | 0 | 1 | 0.036252    | 6.10806   | 5.96161   | No change |
| NM_175485 | Prtg          | 0 | 1 | -0.117471   | 0.206757  | 0.180215  | No change |
| NM_175486 | 6430571L13Rik | 0 | 1 | -0.471108   | 0.300401  | 0.196919  | No change |
| NM_175490 | Gpr75         | 0 | 1 | 0.325359    | 0.42932   | 0.515952  | No change |
| NM_175491 | Smcr8         | 0 | 1 | 0.271767    | 5.25205   | 6.0383    | No change |
| NM_175495 | Gpr150        | 0 | 1 | 0.698817    | 0.0324757 | 0.0669068 | No change |



|           |               |   |   |             |           |           |           |
|-----------|---------------|---|---|-------------|-----------|-----------|-----------|
| NM_175497 | Actb2         | 0 | 1 | 0.113855    | 0         | 0         | No change |
| NM_175500 | Gpc5          | 0 | 1 | 0.936977    | 0.289884  | 0.547453  | No change |
| NM_175501 | Adamts12      | 0 | 1 | 0.113855    | 0.357744  | 0.368513  | No change |
| NM_175502 | Tmem74        | 0 | 1 | -1.47111    | 0.0946915 | 0         | No change |
| NM_175506 | Adamts19      | 0 | 1 | -0.273168   | 0.238981  | 0.184632  | No change |
| NM_175512 | Dhrs9         | 0 | 1 | -1.47111    | 0.0494803 | 0         | No change |
| NM_175513 | Zfp804a       | 0 | 1 | 0.113855    | 0         | 0         | No change |
| NM_175514 | Fam171b       | 0 | 1 | 0.22077     | 0.24641   | 0.27498   | No change |
| NM_175519 | Kctd8         | 0 | 1 | -0.886145   | 0.0723707 | 0.0248498 | No change |
| NM_175520 | Gpr81         | 0 | 1 | 0.698817    | 0.0636465 | 0.109271  | No change |
| NM_175523 | Ppm1k         | 0 | 1 | 0.197225    | 4.41221   | 4.81619   | No change |
| NM_175524 | C130060K24Rik | 0 | 1 | 0.698817    | 0.0236007 | 0.0486224 | No change |
| NM_175525 | D630042P16Rik | 0 | 1 | 0.961852    | 0.211031  | 0.434767  | No change |
| NM_175526 | Clec1a        | 0 | 1 | -0.00162241 | 0.25591   | 0.241646  | No change |
| NM_175528 | E330009J07Rik | 0 | 1 | 0.371653    | 3.25067   | 4.01087   | No change |
| NM_175529 | Leng9         | 0 | 1 | 0.0398542   | 4.0826    | 3.99311   | No change |
| NM_175531 | Mrgprb2       | 0 | 1 | -2.47111    | 0.167854  | 0         | No change |
| NM_175534 | Mrgpre        | 0 | 1 | 1.11385     | 0         | 0.0190883 | No change |
| NM_175539 | Dcaf12l2      | 0 | 1 | -0.886145   | 0.0241905 | 0         | No change |
| NM_175542 | Rttn          | 0 | 1 | -0.23247    | 1.56279   | 1.26417   | No change |
| NM_175546 | Wdfy2         | 0 | 1 | 3.49E-05    | 4.99044   | 4.74799   | No change |
| NM_175548 | Lsamp         | 0 | 1 | -1.88615    | 0.0847502 | 0         | No change |
| NM_175550 | Ap4e1         | 0 | 1 | -0.0478963  | 2.80951   | 2.58597   | No change |
| NM_175561 | Pcnxl2        | 0 | 1 | -0.679694   | 0.492837  | 0.288677  | No change |
| NM_175562 | Rab39         | 0 | 1 | -0.248715   | 0.398782  | 0.314131  | No change |
| NM_175564 | Tmem169       | 0 | 1 | -0.886145   | 0.0247577 | 0         | No change |
| NM_175643 | Adamts2       | 0 | 1 | 0.113855    | 0.782439  | 0.805993  | No change |
| NM_175644 | Gphb5         | 0 | 1 | -0.886145   | 0.0431803 | 0         | No change |
| NM_175645 | Xylt1         | 0 | 1 | -0.0787903  | 0.340519  | 0.304001  | No change |
| NM_175648 | Trim30b       | 0 | 1 | 1.11385     | 0.100603  | 0.233172  | No change |
| NM_175649 | Tnfrsf26      | 0 | 1 | -0.301183   | 0.0702314 | 0.0482304 | No change |
| NM_175650 | Atp13a5       | 0 | 1 | -1.20807    | 0.13831   | 0.0474913 | No change |
| NM_175651 | Cnpy1         | 0 | 1 | 0.113855    | 0         | 0         | No change |
| NM_175652 | Hist4h4       | 0 | 1 | 0.0657605   | 13.4025   | 13.3458   | No change |
| NM_175653 | Hist1h3c      | 0 | 1 | 0.506172    | 4.501     | 6.13215   | No change |
| NM_175655 | Hist1h4f      | 0 | 1 | -0.181152   | 32.3893   | 27.1517   | No change |
| NM_175661 | Hist1h2af     | 0 | 1 | -0.663753   | 10.4628   | 6.21092   | No change |
| NM_175662 | Hist2h2ac     | 0 | 1 | 0.0325547   | 12.8664   | 12.5174   | No change |
| NM_175668 | Gpr4          | 0 | 1 | -0.314988   | 0.821623  | 0.622321  | No change |
| NM_175678 | Npsr1         | 0 | 1 | 0.113855    | 0         | 0         | No change |
| NM_175682 | 9930021D14Rik | 0 | 1 | 0.232499    | 4.82328   | 5.40052   | No change |
| NM_175688 | A530099J19Rik | 0 | 1 | 1.43578     | 0.0251327 | 0.103557  | No change |
| NM_175692 | Shhg11        | 0 | 1 | 0.0111691   | 1.54503   | 1.48136   | No change |
| NM_175730 | Hoxc5         | 0 | 1 | 0.22633     | 0.919028  | 1.02559   | No change |
| NM_175731 | Acer1         | 0 | 1 | 0.113855    | 0         | 0         | No change |
| NM_175750 | Plxna4        | 0 | 1 | -0.309088   | 0.670018  | 0.513363  | No change |
| NM_175936 | Vmn2r81       | 0 | 1 | 0.113855    | 0         | 0         | No change |
| NM_175938 | Btn2a2        | 0 | 1 | -0.886145   | 0.116817  | 0.0481334 | No change |
| NM_176835 | Dnajc22       | 0 | 1 | 0.364398    | 2.71717   | 3.33911   | No change |
| NM_176843 | Ints5         | 0 | 1 | 0.184628    | 3.76604   | 4.07557   | No change |
| NM_176850 | Bptf          | 0 | 1 | -0.0686529  | 13.2676   | 12.0422   | No change |
| NM_176860 | Ubash3b       | 0 | 1 | -0.307609   | 1.59028   | 1.21755   | No change |
| NM_176913 | Dpep2         | 0 | 1 | -1.88615    | 0.276246  | 0.0406517 | No change |
| NM_176919 | Ppm1h         | 0 | 1 | 0.296232    | 3.31083   | 3.87335   | No change |
| NM_176921 | 6030419C18Rik | 0 | 1 | -0.400718   | 0.293238  | 0.201377  | No change |
| NM_176922 | Itga11        | 0 | 1 | -0.507634   | 0.268213  | 0.174497  | No change |
| NM_176931 | Syt15         | 0 | 1 | 1.52889     | 0.0773936 | 0.279032  | No change |
| NM_176933 | Dusp4         | 0 | 1 | -0.140462   | 5.65699   | 4.88072   | No change |
| NM_176959 | Fbxl7         | 0 | 1 | 0.023657    | 0.48314   | 0.466579  | No change |
| NM_176968 | Nt5dc1        | 0 | 1 | 0.048955    | 8.72445   | 8.5906    | No change |
| NM_176982 | Fbxo48        | 0 | 1 | -1.37157    | 0.427968  | 0.135647  | No change |
| NM_177000 | C130050O18Rik | 0 | 1 | -1.24872    | 0.590618  | 0.214729  | No change |
| NM_177001 | 9130023H24Rik | 0 | 1 | -0.067061   | 5.42986   | 4.93175   | No change |
| NM_177002 | C730048C13Rik | 0 | 1 | -0.886145   | 0.0348988 | 0         | No change |
| NM_177013 | Tmem229a      | 0 | 1 | 0.0398542   | 0.26563   | 0.259225  | No change |
| NM_177016 | Slc17a4       | 0 | 1 | 0.113855    | 0         | 0         | No change |
| NM_177028 | 5330437I02Rik | 0 | 1 | -1.47111    | 0.101564  | 0.0209242 | No change |
| NM_177033 | Vwc2          | 0 | 1 | -0.728604   | 0.993387  | 0.561807  | No change |
| NM_177036 | Ceacam19      | 0 | 1 | -0.564217   | 0.14515   | 0.08544   | No change |
| NM_177039 | A530016L24Rik | 0 | 1 | -1.88615    | 0.0793167 | 0         | No change |
| NM_177045 | Cc2d1b        | 0 | 1 | -0.171169   | 7.55042   | 6.37948   | No change |
| NM_177055 | A630001G21Rik | 0 | 1 | 0.113855    | 0.863962  | 0.889971  | No change |
| NM_177056 | Tmem198       | 0 | 1 | -0.54911    | 0.574129  | 0.361419  | No change |
| NM_177059 | Fstl4         | 0 | 1 | 0.698817    | 0.111795  | 0.184257  | No change |
| NM_177061 | Olfrl344      | 0 | 1 | -3.05607    | 0.577167  | 0         | No change |
| NM_177066 | Tnni3k        | 0 | 1 | 0.113855    | 0         | 0         | No change |

|           |               |   |   |             |           |           |           |
|-----------|---------------|---|---|-------------|-----------|-----------|-----------|
| NM_177069 | Fbxw21        | 0 | 1 | -0.886145   | 0.0468997 | 0         | No change |
| NM_177070 | Fbxw16        | 0 | 1 | -0.886145   | 0.0461237 | 0         | No change |
| NM_177073 | Relt          | 0 | 1 | 0.152329    | 0.890645  | 0.942941  | No change |
| NM_177074 | Slc38a11      | 0 | 1 | -0.886145   | 0.477349  | 0.223509  | No change |
| NM_177077 | Exoc6b        | 0 | 1 | 0.137981    | 7.58423   | 7.94452   | No change |
| NM_177082 | Sp8           | 0 | 1 | 1.11385     | 0         | 0.0160248 | No change |
| NM_177084 | Slc9a4        | 0 | 1 | -0.269474   | 0.528806  | 0.41324   | No change |
| NM_177087 | Fam179a       | 0 | 1 | -0.351809   | 0.557066  | 0.409883  | No change |
| NM_177092 | Msrb3         | 0 | 1 | -0.108751   | 21.1447   | 18.6641   | No change |
| NM_177099 | Lefty2        | 0 | 1 | -2.6935     | 0.169914  | 0         | No change |
| NM_177101 | 4833442J19Rik | 0 | 1 | -0.00782375 | 6.37004   | 6.02714   | No change |
| NM_177102 | Tmem91        | 0 | 1 | -1.23407    | 2.14807   | 0.819532  | No change |
| NM_177115 | March3        | 0 | 1 | -0.748642   | 1.54961   | 0.859527  | No change |
| NM_177129 | Cntn2         | 0 | 1 | 0.255874    | 0.204657  | 0.233405  | No change |
| NM_177139 | Lypd6         | 0 | 1 | 0.528892    | 0.342719  | 0.477637  | No change |
| NM_177152 | Lrig3         | 0 | 1 | 0.223479    | 0.636701  | 0.709047  | No change |
| NM_177155 | Klri2         | 0 | 1 | 2.11385     | 0         | 0.0550404 | No change |
| NM_177158 | Rinl          | 0 | 1 | -0.159164   | 0.679221  | 0.574728  | No change |
| NM_177161 | P4ha3         | 0 | 1 | -1.47111    | 0.0590368 | 0         | No change |
| NM_177162 | 9930032O22Rik | 0 | 1 | -0.886145   | 0.0242663 | 0         | No change |
| NM_177164 | Vvc2l         | 0 | 1 | -2.20807    | 0.0598865 | 0         | No change |
| NM_177167 | Ppm1e         | 0 | 1 | -0.253088   | 2.59348   | 2.06904   | No change |
| NM_177182 | Bhlha9        | 0 | 1 | -1.88615    | 0.173222  | 0         | No change |
| NM_177187 | D5ErtD577e    | 0 | 1 | -0.886145   | 0.0280229 | 0         | No change |
| NM_177197 | Idi2          | 0 | 1 | -0.471108   | 0.0621426 | 0.0320067 | No change |
| NM_177200 | Svopl         | 0 | 1 | -0.0950921  | 2.59213   | 2.30605   | No change |
| NM_177201 | Phf8          | 0 | 1 | 0.152329    | 6.19991   | 6.55968   | No change |
| NM_177208 | Dopey1        | 0 | 1 | 0.00155812  | 8.35643   | 7.96279   | No change |
| NM_177225 | Samd12        | 0 | 1 | 0.320306    | 0.895412  | 1.0761    | No change |
| NM_177226 | Zfp629        | 0 | 1 | 0.173709    | 7.52082   | 8.0759    | No change |
| NM_177243 | Slc26a9       | 0 | 1 | -0.301183   | 0.0574392 | 0.0394456 | No change |
| NM_177244 | Fastkd1       | 0 | 1 | -0.267235   | 5.44171   | 4.29841   | No change |
| NM_177250 | Lingo4        | 0 | 1 | -0.208073   | 0.213128  | 0.170757  | No change |
| NM_177265 | 6330512M04Rik | 0 | 1 | 1.43578     | 0.0215768 | 0.0889052 | No change |
| NM_177268 | Ankrd16       | 0 | 1 | 0.278242    | 5.12187   | 5.9165    | No change |
| NM_177301 | Hnrnp1        | 0 | 1 | 0.124036    | 22.9382   | 23.7963   | No change |
| NM_177304 | Enpp6         | 0 | 1 | -0.385716   | 0.909533  | 0.655839  | No change |
| NM_177310 | Xpnpep3       | 0 | 1 | -0.0433849  | 3.94123   | 3.63836   | No change |
| NM_177312 | 6330408A02Rik | 0 | 1 | 0.230894    | 1.45714   | 1.62966   | No change |
| NM_177316 | Fpr-rs6       | 0 | 1 | 0.113855    | 0         | 0         | No change |
| NM_177320 | Pik3r5        | 0 | 1 | 0.206964    | 0.223631  | 0.246817  | No change |
| NM_177330 | Ghsr          | 0 | 1 | 0.113855    | 0         | 0         | No change |
| NM_177333 | Exoc3         | 0 | 1 | -0.146348   | 15.4216   | 13.2616   | No change |
| NM_177338 | Hmbox1        | 0 | 1 | 0.137013    | 7.32358   | 7.66652   | No change |
| NM_177342 | Taf5          | 0 | 1 | -0.175274   | 9.04853   | 7.62421   | No change |
| NM_177344 | Tmem203       | 0 | 1 | 0.172153    | 7.32005   | 7.85459   | No change |
| NM_177345 | Mapkap1       | 0 | 1 | -0.126058   | 16.5573   | 14.4391   | No change |
| NM_177346 | Gpr149        | 0 | 1 | -0.886145   | 0.0208912 | 0         | No change |
| NM_177347 | Ifna13        | 0 | 1 | 1.11385     | 0         | 0.0876569 | No change |
| NM_177348 | Ifne          | 0 | 1 | -0.886145   | 0.104959  | 0         | No change |
| NM_177350 | Gldn          | 0 | 1 | 0.504645    | 0.659602  | 0.89565   | No change |
| NM_177351 | Agphd1        | 0 | 1 | 0.479139    | 0.79212   | 1.05513   | No change |
| NM_177356 | Lamp3         | 0 | 1 | -0.545108   | 0.604575  | 0.38655   | No change |
| NM_177361 | Ifna12        | 0 | 1 | 0.113855    | 0         | 0         | No change |
| NM_177362 | Zfp771        | 0 | 1 | 0.417247    | 2.6064    | 3.3269    | No change |
| NM_177363 | Tarm1         | 0 | 1 | -2.88615    | 0.509771  | 0         | No change |
| NM_177364 | Sh3pxd2b      | 0 | 1 | 0.288533    | 0.937741  | 1.09155   | No change |
| NM_177369 | Myh8          | 0 | 1 | 0.113855    | 0         | 0         | No change |
| NM_177371 | Tnfsf15       | 0 | 1 | -0.063023   | 0.298957  | 0.271002  | No change |
| NM_177378 | Rnf150        | 0 | 1 | 0.320306    | 0.460542  | 0.548532  | No change |
| NM_177380 | Cyp3a44       | 0 | 1 | 0.113855    | 0.0355214 | 0.0365907 | No change |
| NM_177382 | Cyp2r1        | 0 | 1 | 0.135071    | 5.74699   | 6.00835   | No change |
| NM_177383 | Gpr21         | 0 | 1 | 0.410837    | 2.09352   | 2.65661   | No change |
| NM_177387 | Ust           | 0 | 1 | -0.424565   | 0.976092  | 0.687075  | No change |
| NM_177392 | Tmem220       | 0 | 1 | 0.950356    | 0.789894  | 1.50217   | No change |
| NM_177393 | Nalcn         | 0 | 1 | 0.420516    | 0.734641  | 0.938378  | No change |
| NM_177396 | Il28b         | 0 | 1 | -0.886145   | 0.119747  | 0         | No change |
| NM_177406 | Cyp4a12a      | 0 | 1 | -1.62311    | 0.258975  | 0.0592824 | No change |
| NM_177446 | Abpz          | 0 | 1 | 0.113855    | 0         | 0         | No change |
| NM_177462 | Zmym6         | 0 | 1 | 0.140595    | 9.89593   | 10.3849   | No change |
| NM_177469 | Gpr123        | 0 | 1 | 0.113855    | 0.0439426 | 0.0452654 | No change |
| NM_177471 | Ccdc69        | 0 | 1 | -0.0787903  | 1.12962   | 1.01185   | No change |
| NM_177475 | Zfp280b       | 0 | 1 | -0.120157   | 2.6596    | 2.32724   | No change |
| NM_177544 | Ang4          | 0 | 1 | -1.88615    | 0.300833  | 0         | No change |
| NM_177561 | Usp46         | 0 | 1 | -0.0339518  | 17.2882   | 16.0723   | No change |
| NM_177564 | Dhrs11        | 0 | 1 | -0.244939   | 5.29686   | 4.2438    | No change |

|           |               |   |   |             |           |           |           |
|-----------|---------------|---|---|-------------|-----------|-----------|-----------|
| NM_177571 | Gm13103       | 0 | 1 | 0.113855    | 0         | 0         | No change |
| NM_177572 | Rimk1a        | 0 | 1 | -0.471108   | 0.137191  | 0.0883255 | No change |
| NM_177573 | 9930104L06Rik | 0 | 1 | 0.10414     | 3.50597   | 3.58711   | No change |
| NM_177580 | Baiap212      | 0 | 1 | -0.886145   | 0.100907  | 0.0346482 | No change |
| NM_177582 | Mlxip         | 0 | 1 | -0.158225   | 1.97599   | 1.68008   | No change |
| NM_177591 | Igsf1         | 0 | 1 | 1.69882     | 0         | 0.032514  | No change |
| NM_177595 | Mkx           | 0 | 1 | 0.87939     | 0.19595   | 0.358843  | No change |
| NM_177598 | Fbxw13        | 0 | 1 | -1.47111    | 0.0938625 | 0         | No change |
| NM_177600 | Ccdc73        | 0 | 1 | -0.078164   | 5.79596   | 5.22414   | No change |
| NM_177610 | Duox2         | 0 | 1 | -0.471108   | 0.0306074 | 0.0157644 | No change |
| NM_177615 | Slc26a10      | 0 | 1 | -1.3191     | 0.818066  | 0.291701  | No change |
| NM_177618 | Wscd1         | 0 | 1 | 0.661343    | 0.305448  | 0.471964  | No change |
| NM_177624 | Sntn          | 0 | 1 | 0.506172    | 0.84306   | 1.15792   | No change |
| NM_177629 | AU021034      | 0 | 1 | 0.500878    | 0.373689  | 0.513251  | No change |
| NM_177632 | Fam43a        | 0 | 1 | 0.594982    | 1.06523   | 1.54088   | No change |
| NM_177634 | H2-M10.4      | 0 | 1 | -1.47111    | 0.139946  | 0         | No change |
| NM_177635 | H2-M11        | 0 | 1 | 0.113855    | 0         | 0         | No change |
| NM_177636 | H2-M1         | 0 | 1 | 0.113855    | 0         | 0         | No change |
| NM_177637 | H2-M10.5      | 0 | 1 | 0.113855    | 0         | 0         | No change |
| NM_177642 | Igfn1         | 0 | 1 | -1.53822    | 0.162689  | 0.0478819 | No change |
| NM_177653 | F830045P16Rik | 0 | 1 | -0.886145   | 0.0362041 | 0         | No change |
| NM_177661 | C130079G13Rik | 0 | 1 | 0.113855    | 0         | 0         | No change |
| NM_177665 | Gm4861        | 0 | 1 | 0.576198    | 3.20427   | 4.57602   | No change |
| NM_177667 | Ttc22         | 0 | 1 | 0.113855    | 0.0274923 | 0.0283199 | No change |
| NM_177668 | Skint10       | 0 | 1 | -1.47111    | 0.0806165 | 0         | No change |
| NM_177671 | Epha10        | 0 | 1 | 0.113855    | 0         | 0         | No change |
| NM_177680 | Ythdc1        | 0 | 1 | 0.0772628   | 12.8176   | 12.8722   | No change |
| NM_177681 | Zfp12         | 0 | 1 | 0.0946952   | 6.16809   | 6.26973   | No change |
| NM_177682 | Ccz1          | 0 | 1 | -0.0790269  | 34.2752   | 30.8835   | No change |
| NM_177683 | Vgll4         | 0 | 1 | 0.28378     | 10.7261   | 12.4371   | No change |
| NM_177686 | Clec12a       | 0 | 1 | -0.0725583  | 1.00368   | 0.904657  | No change |
| NM_177690 | Nlrp2         | 0 | 1 | 0.113855    | 0         | 0         | No change |
| NM_177691 | Ppm1n         | 0 | 1 | 1.11385     | 0         | 0.0440165 | No change |
| NM_177693 | Lim2          | 0 | 1 | 0.113855    | 0         | 0         | No change |
| NM_177695 | Tmc3          | 0 | 1 | 0.255874    | 0.452132  | 0.515644  | No change |
| NM_177699 | Fhod1         | 0 | 1 | -0.331556   | 2.2419    | 1.69112   | No change |
| NM_177701 | Gm4894        | 0 | 1 | 0.113855    | 0         | 0         | No change |
| NM_177703 | Fbxw19        | 0 | 1 | 0.113855    | 0         | 0         | No change |
| NM_177707 | Stac3         | 0 | 1 | -0.0560702  | 0.311477  | 0.280747  | No change |
| NM_177708 | Rtn4rl1       | 0 | 1 | 0.0388928   | 1.6433    | 1.60596   | No change |
| NM_177709 | Tusc5         | 0 | 1 | 1.25136     | 0.0861204 | 0.221782  | No change |
| NM_177717 | 4732456N10Rik | 0 | 1 | 0.85082     | 0.0550063 | 0.113324  | No change |
| NM_177718 | 1600021P15Rik | 0 | 1 | 0.153383    | 1.60656   | 1.70154   | No change |
| NM_177723 | Vsig8         | 0 | 1 | -1.27846    | 0.773936  | 0.279032  | No change |
| NM_177725 | Lrrc8a        | 0 | 1 | 0.143808    | 4.66913   | 4.91095   | No change |
| NM_177726 | Tgm6          | 0 | 1 | -0.886145   | 0.0210553 | 0         | No change |
| NM_177727 | Lsm14b        | 0 | 1 | 0.0734657   | 8.93852   | 8.95262   | No change |
| NM_177732 | Slc35d1       | 0 | 1 | 0.310252    | 1.13224   | 1.34003   | No change |
| NM_177733 | E2f2          | 0 | 1 | -0.471108   | 0.205931  | 0.13637   | No change |
| NM_177739 | Zfp507        | 0 | 1 | -0.00162241 | 7.84906   | 7.46257   | No change |
| NM_177740 | Rgma          | 0 | 1 | -0.0236487  | 0.621911  | 0.580574  | No change |
| NM_177744 | Apol10a       | 0 | 1 | -2.47111    | 0.114891  | 0         | No change |
| NM_177746 | Awat2         | 0 | 1 | -0.752879   | 1.31248   | 0.721064  | No change |
| NM_177748 | Kir3dl2       | 0 | 1 | -0.886145   | 0.040192  | 0         | No change |
| NM_177749 | Kir3dl1       | 0 | 1 | 0.113855    | 0         | 0         | No change |
| NM_177750 | Frpm3         | 0 | 1 | -2.47111    | 0.110941  | 0         | No change |
| NM_177753 | Sox21         | 0 | 1 | 1.69882     | 0         | 0.0378146 | No change |
| NM_177755 | Klh38         | 0 | 1 | -0.264657   | 0.378081  | 0.292097  | No change |
| NM_177756 | Glit25d2      | 0 | 1 | 0.113855    | 0.154644  | 0.159299  | No change |
| NM_177763 | Lhfp14        | 0 | 1 | -0.623111   | 0.058504  | 0.0301326 | No change |
| NM_177764 | Vmn2r57       | 0 | 1 | -0.248715   | 0.457091  | 0.360063  | No change |
| NM_177769 | Elmod1        | 0 | 1 | 0.492366    | 0.508317  | 0.688973  | No change |
| NM_177774 | Srsf12        | 0 | 1 | 1.19186     | 0.189705  | 0.439686  | No change |
| NM_177775 | Esy13         | 0 | 1 | -0.0523945  | 11.3905   | 10.4545   | No change |
| NM_177781 | Trpa1         | 0 | 1 | 0.113855    | 0         | 0         | No change |
| NM_177787 | Slc15a5       | 0 | 1 | -1.47111    | 0.0566379 | 0         | No change |
| NM_177789 | Vsig4         | 0 | 1 | -1.47111    | 0.389346  | 0.100267  | No change |
| NM_177793 | 9030224M15Rik | 0 | 1 | -2.6935     | 0.273484  | 0         | No change |
| NM_177794 | Tmem26        | 0 | 1 | 0.94393     | 0.110361  | 0.213156  | No change |
| NM_177809 | Slc25a48      | 0 | 1 | -1.88615    | 0.139572  | 0         | No change |
| NM_177811 | Zfp459        | 0 | 1 | 0.698817    | 0.648988  | 1.01357   | No change |
| NM_177816 | Sh2d4b        | 0 | 1 | -0.71622    | 0.806631  | 0.443154  | No change |
| NM_177820 | Apol10b       | 0 | 1 | -0.471108   | 0.807119  | 0.542228  | No change |
| NM_177821 | Ep300         | 0 | 1 | 0.145333    | 6.49214   | 6.83528   | No change |
| NM_177822 | Msln1         | 0 | 1 | 0.113855    | 0.0530388 | 0.0546354 | No change |
| NM_177823 | Ubash3a       | 0 | 1 | -1.20807    | 0.212407  | 0.0729336 | No change |

|           |               |   |   |             |           |           |           |
|-----------|---------------|---|---|-------------|-----------|-----------|-----------|
| NM_177828 | Arhgef37      | 0 | 1 | 0.413415    | 1.93951   | 2.46407   | No change |
| NM_177832 | Zfp236        | 0 | 1 | 0.0184352   | 8.26928   | 7.97256   | No change |
| NM_177838 | Fam163a       | 0 | 1 | -1.47111    | 0.0359057 | 0         | No change |
| NM_177839 | Tnn           | 0 | 1 | -0.886145   | 0.0359922 | 0.0123586 | No change |
| NM_177843 | Gm14461       | 0 | 1 | -1.47111    | 0.0783067 | 0         | No change |
| NM_177845 | Pla2g4e       | 0 | 1 | -1.10854    | 0.0934013 | 0.032071  | No change |
| NM_177854 | 6030405A18Rik | 0 | 1 | 0.113855    | 0         | 0         | No change |
| NM_177855 | Med12l        | 0 | 1 | -0.0336125  | 1.67345   | 1.55565   | No change |
| NM_177856 | E130311K13Rik | 0 | 1 | 0.336247    | 3.21103   | 3.86674   | No change |
| NM_177860 | Gm5105        | 0 | 1 | 0.113855    | 0.0418576 | 0.0431177 | No change |
| NM_177864 | Skint9        | 0 | 1 | -2.20807    | 0.203186  | 0         | No change |
| NM_177865 | Skint2        | 0 | 1 | 0.113855    | 0         | 0         | No change |
| NM_177869 | Fam185a       | 0 | 1 | -0.0107718  | 3.25626   | 3.07476   | No change |
| NM_177876 | Vps37b        | 0 | 1 | 0.165916    | 10.5427   | 11.2602   | No change |
| NM_177878 | Mblac1        | 0 | 1 | 0.143602    | 2.50426   | 2.63453   | No change |
| NM_177879 | Sdk1          | 0 | 1 | 0.324622    | 0.720425  | 0.860176  | No change |
| NM_177882 | Zfp786        | 0 | 1 | 0.0868878   | 1.30566   | 1.31959   | No change |
| NM_177884 | AW146020      | 0 | 1 | 0.13939     | 2.29212   | 2.40367   | No change |
| NM_177889 | Zfp82         | 0 | 1 | 0.0006442   | 1.74484   | 1.65911   | No change |
| NM_177894 | Fam154b       | 0 | 1 | -0.49758    | 1.34986   | 0.90125   | No change |
| NM_177897 | B4galnt4      | 0 | 1 | -0.189214   | 2.10987   | 1.7572    | No change |
| NM_177898 | Nek5          | 0 | 1 | 0.542698    | 0.72476   | 1.01535   | No change |
| NM_177900 | Haplh4        | 0 | 1 | -1.20807    | 0.0779563 | 0.0200758 | No change |
| NM_177909 | Slc9a9        | 0 | 1 | -0.0732307  | 1.45693   | 1.31576   | No change |
| NM_177913 | A430089I19Rik | 0 | 1 | -2.20807    | 0.150851  | 0         | No change |
| NM_177914 | Dgkk          | 0 | 1 | 0.113855    | 0.0389564 | 0.0401291 | No change |
| NM_177920 | Serpina7      | 0 | 1 | -0.886145   | 0.266004  | 0.121783  | No change |
| NM_177921 | E230019M04Rik | 0 | 1 | 0.85082     | 0.0923697 | 0.190301  | No change |
| NM_177923 | H2-M10.2      | 0 | 1 | 0.628428    | 0.422381  | 0.652645  | No change |
| NM_178020 | Hyal3         | 0 | 1 | 0.0613874   | 1.02826   | 1.01998   | No change |
| NM_178028 | Galp          | 0 | 1 | -0.886145   | 0.10722   | 0         | No change |
| NM_178029 | Setd1a        | 0 | 1 | -0.291558   | 2.91415   | 2.26352   | No change |
| NM_178060 | Thra          | 0 | 1 | 0.215734    | 2.51341   | 2.78086   | No change |
| NM_178061 | Mobkl2b       | 0 | 1 | -0.514176   | 1.46291   | 0.964446  | No change |
| NM_178066 | 1110012D08Rik | 0 | 1 | 0.268577    | 3.13394   | 3.59724   | No change |
| NM_178069 | Lsg1          | 0 | 1 | -0.0384632  | 15.3797   | 14.2522   | No change |
| NM_178070 | Vps33b        | 0 | 1 | 0.173561    | 1.89973   | 2.04079   | No change |
| NM_178079 | Pm20d1        | 0 | 1 | 0.413415    | 0.236247  | 0.304199  | No change |
| NM_178098 | 4930486L24Rik | 0 | 1 | -1.47111    | 0.406077  | 0.104575  | No change |
| NM_178110 | Trim62        | 0 | 1 | -0.663753   | 0.762743  | 0.448974  | No change |
| NM_178115 | 2700050L05Rik | 0 | 1 | 0.00739066  | 6.4105    | 6.13276   | No change |
| NM_178183 | Hist1h2ak     | 0 | 1 | -1.17565    | 3.72405   | 1.46139   | No change |
| NM_178197 | Hist1h2bh     | 0 | 1 | -0.0725583  | 17.9263   | 16.2048   | No change |
| NM_178199 | Hist1h2bl     | 0 | 1 | -0.182035   | 82.6803   | 69.3414   | No change |
| NM_178201 | Hist1h2bn     | 0 | 1 | -0.168635   | 79.0219   | 66.8919   | No change |
| NM_178203 | Hist1h3b      | 0 | 1 | 0.580423    | 9.15674   | 13.1005   | No change |
| NM_178204 | Hist1h3d      | 0 | 1 | 0.685012    | 5.76535   | 8.90837   | No change |
| NM_178206 | Hist1h3h      | 0 | 1 | -0.102957   | 5.99816   | 5.29606   | No change |
| NM_178207 | Hist1h3i      | 0 | 1 | -0.514176   | 4.76163   | 3.12135   | No change |
| NM_178213 | Hist2h2ab     | 0 | 1 | -0.00162241 | 4.43339   | 4.20151   | No change |
| NM_178214 | Hist2h2be     | 0 | 1 | 0.219517    | 8.73158   | 9.67999   | No change |
| NM_178215 | Hist2h3b      | 0 | 1 | 0.315489    | 3.22181   | 3.84283   | No change |
| NM_178216 | Hist2h3c1     | 0 | 1 | 0.0649452   | 3.70164   | 3.68159   | No change |
| NM_178240 | Trim50        | 0 | 1 | -1.47111    | 0.383983  | 0.0988856 | No change |
| NM_178241 | Cxcr1         | 0 | 1 | 0.113855    | 0         | 0         | No change |
| NM_178245 | Bsx           | 0 | 1 | 0.113855    | 0         | 0         | No change |
| NM_178249 | Pramel6       | 0 | 1 | 0.113855    | 0         | 0         | No change |
| NM_178250 | Pramel7       | 0 | 1 | -2.6935     | 0.224816  | 0         | No change |
| NM_178253 | Klhdc1        | 0 | 1 | -0.371572   | 3.21825   | 2.35743   | No change |
| NM_178255 | Haplh3        | 0 | 1 | 0.961852    | 0.437709  | 0.851672  | No change |
| NM_178257 | Il22ra1       | 0 | 1 | 1.11385     | 0.0798315 | 0.205587  | No change |
| NM_178258 | Il22ra2       | 0 | 1 | -0.471108   | 0.310625  | 0.203621  | No change |
| NM_178259 | Abca13        | 0 | 1 | -1.79304    | 0.0609394 | 0.0134516 | No change |
| NM_178260 | Kiss1         | 0 | 1 | 0.698817    | 0.70255   | 1.15792   | No change |
| NM_178308 | Abpg          | 0 | 1 | 0.113855    | 0         | 0         | No change |
| NM_178357 | Klf11         | 0 | 1 | 0.322441    | 1.55768   | 1.85697   | No change |
| NM_178358 | Lhfpl1        | 0 | 1 | 0.791927    | 0.157143  | 0.283279  | No change |
| NM_178365 | Pacsin1       | 0 | 1 | 0.452657    | 2.67896   | 3.50099   | No change |
| NM_178372 | Prss34        | 0 | 1 | 0.113855    | 0         | 0         | No change |
| NM_178373 | Cidec         | 0 | 1 | 1.11385     | 0         | 0.0421804 | No change |
| NM_178379 | Cox10         | 0 | 1 | -0.244599   | 5.94096   | 4.76804   | No change |
| NM_178381 | Ano9          | 0 | 1 | -0.413392   | 1.11064   | 0.786554  | No change |
| NM_178390 | Fam53a        | 0 | 1 | 0.216581    | 9.39446   | 10.3941   | No change |
| NM_178395 | Zdhhc2        | 0 | 1 | -0.886145   | 1.03228   | 0.517309  | No change |
| NM_178397 | Faf2          | 0 | 1 | -0.0426497  | 12.0616   | 11.1457   | No change |
| NM_178398 | Wipi2         | 0 | 1 | 0.0391239   | 14.8082   | 14.483    | No change |

|           |               |   |   |             |           |           |           |
|-----------|---------------|---|---|-------------|-----------|-----------|-----------|
| NM_178404 | Zc3h6         | 0 | 1 | 0.177686    | 5.94006   | 6.39635   | No change |
| NM_178411 | Zfp334        | 0 | 1 | 0.0111691   | 1.80014   | 1.72595   | No change |
| NM_178412 | BC051070      | 0 | 1 | 0.113855    | 0.0417823 | 0.0430402 | No change |
| NM_178414 | Acsm4         | 0 | 1 | -1.47111    | 0.0647403 | 0         | No change |
| NM_178417 | Zfp867        | 0 | 1 | -0.212956   | 4.51411   | 3.70317   | No change |
| NM_178421 | Nanos1        | 0 | 1 | -0.168545   | 0.780674  | 0.657962  | No change |
| NM_178440 | Myo1g         | 0 | 1 | -0.16178    | 0.463636  | 0.390758  | No change |
| NM_178576 | Cpsf4         | 0 | 1 | -0.11011    | 6.6002    | 5.81485   | No change |
| NM_178591 | Nrg1          | 0 | 1 | 0.376889    | 0.132559  | 0.170687  | No change |
| NM_178592 | Abhd16a       | 0 | 1 | 0.204801    | 10.4271   | 11.4423   | No change |
| NM_178594 | Vtcn1         | 0 | 1 | -0.123184   | 0.850562  | 0.739266  | No change |
| NM_178596 | Gjd3          | 0 | 1 | -0.886145   | 0.0832652 | 0         | No change |
| NM_178605 | Nop16         | 0 | 1 | 0.0884695   | 6.87283   | 6.95553   | No change |
| NM_178610 | Krr1          | 0 | 1 | 0.154689    | 5.82404   | 6.17201   | No change |
| NM_178614 | Samm50        | 0 | 1 | 0.276126    | 5.20718   | 6.00761   | No change |
| NM_178618 | Fam83g        | 0 | 1 | 0.211466    | 1.44162   | 1.59002   | No change |
| NM_178624 | Fbxl2         | 0 | 1 | 0.338415    | 2.04531   | 2.4655    | No change |
| NM_178629 | Ispd          | 0 | 1 | -0.507634   | 1.52858   | 1.01415   | No change |
| NM_178632 | Ints7         | 0 | 1 | -0.282074   | 5.87204   | 4.5918    | No change |
| NM_178639 | Sfxn5         | 0 | 1 | 0.452657    | 0.629411  | 0.825184  | No change |
| NM_178643 | C230052I12Rik | 0 | 1 | -0.121773   | 2.80643   | 2.44924   | No change |
| NM_178645 | Blmh          | 0 | 1 | 0.177985    | 5.17888   | 5.57866   | No change |
| NM_178646 | Tigd5         | 0 | 1 | -0.00432662 | 1.27744   | 1.21122   | No change |
| NM_178650 | Tbc1d10c      | 0 | 1 | 0.164481    | 1.06976   | 1.14278   | No change |
| NM_178652 | Supt3h        | 0 | 1 | 0.161949    | 2.72568   | 2.90456   | No change |
| NM_178654 | Pkn2          | 0 | 1 | 0.0218088   | 17.2464   | 16.6668   | No change |
| NM_178657 | Oog1          | 0 | 1 | -0.886145   | 0.0384619 | 0         | No change |
| NM_178666 | Themis        | 0 | 1 | -0.301183   | 0.262596  | 0.198367  | No change |
| NM_178669 | Clrn3         | 0 | 1 | -0.345577   | 0.441494  | 0.324846  | No change |
| NM_178670 | 8030462N17Rik | 0 | 1 | -0.241878   | 8.56379   | 6.88924   | No change |
| NM_178673 | Fstl5         | 0 | 1 | -2.47111    | 0.0731301 | 0         | No change |
| NM_178674 | Fbxl21        | 0 | 1 | 0.573286    | 0.815744  | 1.16912   | No change |
| NM_178675 | Slc35f1       | 0 | 1 | -0.371572   | 0.0840856 | 0.0577446 | No change |
| NM_178676 | Entpd3        | 0 | 1 | -0.803683   | 0.323026  | 0.166375  | No change |
| NM_178681 | Dgkb          | 0 | 1 | -0.0787903  | 0.0879961 | 0.0776959 | No change |
| NM_178685 | Pcdh20        | 0 | 1 | -0.886145   | 0.0133078 | 0         | No change |
| NM_178692 | C130074G19Rik | 0 | 1 | 0.231781    | 7.71923   | 8.63102   | No change |
| NM_178697 | Clca5         | 0 | 1 | 1.98832     | 0.0355486 | 0.183094  | No change |
| NM_178703 | Slc6a1        | 0 | 1 | -2.20807    | 0.0649061 | 0         | No change |
| NM_178705 | Luzp2         | 0 | 1 | 0.587786    | 0.224645  | 0.326694  | No change |
| NM_178706 | Siglech       | 0 | 1 | 0.393963    | 0.377976  | 0.479205  | No change |
| NM_178707 | Zfp592        | 0 | 1 | 0.0890107   | 3.909     | 3.95776   | No change |
| NM_178709 | Rnf214        | 0 | 1 | 0.19202     | 8.58723   | 9.33928   | No change |
| NM_178710 | Sik2          | 0 | 1 | -0.0497878  | 7.8483    | 7.21548   | No change |
| NM_178711 | Plscr4        | 0 | 1 | 0.201318    | 1.00508   | 1.10143   | No change |
| NM_178713 | Aldh8a1       | 0 | 1 | -1.56422    | 0.46607   | 0.128027  | No change |
| NM_178714 | Lrfn5         | 0 | 1 | 1.33625     | 0.037409  | 0.115605  | No change |
| NM_178717 | Rxfp3         | 0 | 1 | 0.113855    | 0         | 0         | No change |
| NM_178720 | Zpld1         | 0 | 1 | 0.113855    | 0         | 0         | No change |
| NM_178724 | Harbi1        | 0 | 1 | 0.191023    | 5.48215   | 5.95918   | No change |
| NM_178725 | Lrrc4c        | 0 | 1 | 0.94393     | 0.160444  | 0.309889  | No change |
| NM_178726 | Ppm1l         | 0 | 1 | -0.489486   | 1.37482   | 0.925984  | No change |
| NM_178730 | Tmprss11f     | 0 | 1 | -3.20807    | 0.146653  | 0         | No change |
| NM_178731 | Lrrtm4        | 0 | 1 | 0.113855    | 0         | 0         | No change |
| NM_178740 | Slitrk4       | 0 | 1 | 1.69882     | 0         | 0.0364884 | No change |
| NM_178743 | Slc26a11      | 0 | 1 | 0.0814333   | 1.13911   | 1.14674   | No change |
| NM_178747 | Gulo          | 0 | 1 | 1.98832     | 0.061539  | 0.316958  | No change |
| NM_178749 | Stk32a        | 0 | 1 | -1.20807    | 0.166597  | 0.057204  | No change |
| NM_178752 | D330012F22Rik | 0 | 1 | 0.0497245   | 1.34634   | 1.32569   | No change |
| NM_178753 | Spin4         | 0 | 1 | 0.290733    | 0.367156  | 0.429783  | No change |
| NM_178756 | E130309F12Rik | 0 | 1 | -1.88615    | 0.0555765 | 0         | No change |
| NM_178757 | Irf2bp1       | 0 | 1 | 0.261953    | 2.84039   | 3.24509   | No change |
| NM_178758 | Acsm5         | 0 | 1 | -1.47111    | 0.0559558 | 0         | No change |
| NM_178759 | Timd4         | 0 | 1 | -2.6935     | 0.192256  | 0         | No change |
| NM_178760 | Gpr107        | 0 | 1 | 0.0874901   | 8.80481   | 8.9053    | No change |
| NM_178766 | Slc25a40      | 0 | 1 | -0.212539   | 2.80777   | 3.09889   | No change |
| NM_178768 | Tmem72        | 0 | 1 | -1.88615    | 0.0626923 | 0         | No change |
| NM_178773 | Ano4          | 0 | 1 | -0.564217   | 0.118497  | 0.0697508 | No change |
| NM_178774 | Prr18         | 0 | 1 | 0.113855    | 0.192877  | 0.198684  | No change |
| NM_178777 | Nhlh2         | 0 | 1 | 0.113855    | 0         | 0         | No change |
| NM_178782 | Bcor1         | 0 | 1 | -0.530001   | 0.842004  | 0.550886  | No change |
| NM_178786 | Skint4        | 0 | 1 | 1.11385     | 0         | 0.0179612 | No change |
| NM_178793 | Ccbe1         | 0 | 1 | -0.130564   | 1.85702   | 1.61286   | No change |
| NM_178848 | Sirt5         | 0 | 1 | 0.557461    | 1.22807   | 1.73943   | No change |
| NM_178856 | Gins2         | 0 | 1 | -0.024592   | 10.2055   | 9.54446   | No change |
| NM_178874 | Tmcc2         | 0 | 1 | 0.366621    | 0.940139  | 1.15792   | No change |

|           |           |   |   |            |           |           |           |
|-----------|-----------|---|---|------------|-----------|-----------|-----------|
| NM_178877 | Nhedc2    | 0 | 1 | -1.20807   | 0.124285  | 0.0320067 | No change |
| NM_178882 | D2hgdh    | 0 | 1 | 0.0829938  | 4.28459   | 4.31967   | No change |
| NM_178884 | Obsl1     | 0 | 1 | -0.285501  | 2.93508   | 2.28935   | No change |
| NM_178885 | Al182371  | 0 | 1 | 0.113855   | 0.4102    | 0.422548  | No change |
| NM_178887 | Fibcd1    | 0 | 1 | -0.663753  | 0.513419  | 0.302214  | No change |
| NM_178889 | Zscan29   | 0 | 1 | 0.166322   | 2.98799   | 3.19233   | No change |
| NM_178891 | Prmt6     | 0 | 1 | 0.384307   | 2.72749   | 3.39493   | No change |
| NM_178894 | AA792892  | 0 | 1 | -1.20807   | 0.23001   | 0.0592335 | No change |
| NM_178901 | Al467606  | 0 | 1 | 0.406902   | 3.99699   | 5.05307   | No change |
| NM_178906 | Al593442  | 0 | 1 | -2.05607   | 0.09926   | 0.012781  | No change |
| NM_178908 | Fam26e    | 0 | 1 | 0.113855   | 0.507283  | 0.522555  | No change |
| NM_178909 | Wdr92     | 0 | 1 | -0.158517  | 5.64694   | 4.81257   | No change |
| NM_178911 | Pld4      | 0 | 1 | -0.309357  | 2.04357   | 1.56067   | No change |
| NM_178922 | Hic2      | 0 | 1 | 0.103731   | 1.56119   | 1.59686   | No change |
| NM_178929 | Kazald1   | 0 | 1 | -0.538222  | 1.06054   | 0.676292  | No change |
| NM_178931 | Tnfrsf14  | 0 | 1 | 0.00693961 | 1.01457   | 0.964716  | No change |
| NM_178932 | Aoc2      | 0 | 1 | -0.670416  | 1.67703   | 0.991197  | No change |
| NM_178933 | Ostb      | 0 | 1 | -1.10854   | 0.85688   | 0.294225  | No change |
| NM_180600 | Ube2q2    | 0 | 1 | 0.0980133  | 15.1661   | 15.4518   | No change |
| NM_181039 | Lphn1     | 0 | 1 | 0.0200466  | 7.02207   | 6.77753   | No change |
| NM_181040 | Atpaf1    | 0 | 1 | -0.104917  | 6.4603    | 5.7137    | No change |
| NM_181071 | Tanc2     | 0 | 1 | 0.0870548  | 4.78371   | 4.83692   | No change |
| NM_181273 | Heph      | 0 | 1 | 0.397648   | 0.797808  | 1.00445   | No change |
| NM_181275 | Tas2r139  | 0 | 1 | -1.20807   | 0.290387  | 0.0747823 | No change |
| NM_181276 | Tas2r136  | 0 | 1 | 0.113855   | 0         | 0         | No change |
| NM_181317 | Kcns2     | 0 | 1 | -0.734142  | 0.127877  | 0.0658633 | No change |
| NM_181390 | Mustn1    | 0 | 1 | 0.698817   | 1.4778    | 2.31387   | No change |
| NM_181395 | Pxdn      | 0 | 1 | 0.245099   | 0.874586  | 0.98775   | No change |
| NM_181400 | Wdr47     | 0 | 1 | -0.192711  | 6.53526   | 5.44      | No change |
| NM_181405 | Rnpepl1   | 0 | 1 | -0.0371211 | 7.13212   | 6.6145    | No change |
| NM_181406 | Rars2     | 0 | 1 | 0.301482   | 2.65035   | 3.11466   | No change |
| NM_181410 | Gtf2h3    | 0 | 1 | 0.24237    | 4.18576   | 4.716     | No change |
| NM_181411 | Aftph     | 0 | 1 | 0.106535   | 35.3658   | 36.246    | No change |
| NM_181413 | Anks1     | 0 | 1 | 0.173976   | 2.88844   | 3.10255   | No change |
| NM_181415 | Atrnl1    | 0 | 1 | 0.077213   | 3.3666    | 3.38071   | No change |
| NM_181420 | Fn3krp    | 0 | 1 | 0.190476   | 5.63592   | 6.12418   | No change |
| NM_181422 | Pkd2l1    | 0 | 1 | -0.211985  | 5.79201   | 4.7558    | No change |
| NM_181423 | Supv3l1   | 0 | 1 | -0.111705  | 8.83555   | 7.77986   | No change |
| NM_181444 | Gprc5a    | 0 | 1 | 0.824348   | 0.336518  | 0.589303  | No change |
| NM_181490 | Cldn17    | 0 | 1 | 0.113855   | 0         | 0         | No change |
| NM_181540 | Tm6sf2    | 0 | 1 | -1.62311   | 0.442339  | 0.101257  | No change |
| NM_181541 | Caprin2   | 0 | 1 | 0.243024   | 7.07483   | 7.9723    | No change |
| NM_181542 | Sifn10-ps | 0 | 1 | -0.0466099 | 0.358626  | 0.328375  | No change |
| NM_181543 | Gpr151    | 0 | 1 | 0.435783   | 0.469456  | 0.615477  | No change |
| NM_181546 | Syt14     | 0 | 1 | -0.38091   | 1.20785   | 0.870948  | No change |
| NM_181547 | Nostrin   | 0 | 1 | 0.476425   | 0.23141   | 0.317835  | No change |
| NM_181548 | Eras      | 0 | 1 | -1.47111   | 0.12942   | 0         | No change |
| NM_181564 | Dsg4      | 0 | 1 | 0.113855   | 0         | 0         | No change |
| NM_181569 | Nprl3     | 0 | 1 | -0.103502  | 12.8794   | 11.4072   | No change |
| NM_181579 | Pof1b     | 0 | 1 | -1.88615   | 0.125411  | 0.0184553 | No change |
| NM_181584 | Gab3      | 0 | 1 | -0.886145  | 0.491719  | 0.236377  | No change |
| NM_181588 | Cmb1      | 0 | 1 | -0.108538  | 3.21351   | 2.8275    | No change |
| NM_181590 | Shq1      | 0 | 1 | -0.191     | 5.8486    | 4.87024   | No change |
| NM_181593 | Itpkc     | 0 | 1 | -0.152127  | 4.22316   | 3.61409   | No change |
| NM_181596 | Retnlg    | 0 | 1 | -1.6935    | 0.687759  | 0.118077  | No change |
| NM_181650 | Prdm4     | 0 | 1 | -0.0300901 | 15.1514   | 14.1237   | No change |
| NM_181680 | Dsg1c     | 0 | 1 | -0.886145  | 0.30403   | 0.144546  | No change |
| NM_181729 | Muc6      | 0 | 1 | -0.31678   | 0.255973  | 0.193365  | No change |
| NM_181749 | Gpr142    | 0 | 1 | 0.698817   | 0.317363  | 0.523067  | No change |
| NM_181751 | Gpr119    | 0 | 1 | 0.113855   | 0         | 0         | No change |
| NM_181752 | Gpr135    | 0 | 1 | -1.02365   | 0.507227  | 0.208998  | No change |
| NM_181753 | Opn5      | 0 | 1 | 0.113855   | 0         | 0         | No change |
| NM_181754 | Gpr141    | 0 | 1 | 0.113855   | 0.0406018 | 0.041824  | No change |
| NM_181817 | Rxfp4     | 0 | 1 | 0.698817   | 0.0559783 | 0.115327  | No change |
| NM_181818 | Olfir141  | 0 | 1 | 0.113855   | 0         | 0         | No change |
| NM_181819 | Wfikkn2   | 0 | 1 | 0.224886   | 0.49311   | 0.550285  | No change |
| NM_181849 | Fgb       | 0 | 1 | -0.886145  | 0.132917  | 0.0456395 | No change |
| NM_181850 | Grm3      | 0 | 1 | -1.30118   | 0.137967  | 0.0406058 | No change |
| NM_181852 | Pr12c5    | 0 | 1 | 0.113855   | 0         | 0         | No change |
| NM_181854 | Zfp828    | 0 | 1 | 0.144515   | 7.25932   | 7.63886   | No change |
| NM_181989 | Sdr16c5   | 0 | 1 | -1.47111   | 0.101078  | 0         | No change |
| NM_182714 | Olfir91   | 0 | 1 | -0.886145  | 0.0742204 | 0         | No change |
| NM_182783 | Fam167b   | 0 | 1 | -0.248715  | 0.590618  | 0.456299  | No change |
| NM_182805 | Gpt       | 0 | 1 | -0.0787903 | 1.23456   | 1.10763   | No change |
| NM_182806 | Gpr18     | 0 | 1 | -0.309953  | 2.87284   | 2.19209   | No change |
| NM_182808 | Fam19a1   | 0 | 1 | -0.301183  | 0.0643122 | 0.0441655 | No change |

|           |               |   |   |             |           |           |           |
|-----------|---------------|---|---|-------------|-----------|-----------|-----------|
| NM_182839 | Tppp          | 0 | 1 | -0.0216602  | 1.97167   | 1.84767   | No change |
| NM_182928 | Adm2          | 0 | 1 | 0.698817    | 0.0666918 | 0.137399  | No change |
| NM_182929 | Rims3         | 0 | 1 | -2.20807    | 0.642003  | 0.073481  | No change |
| NM_182997 | Prkab2        | 0 | 1 | -0.301183   | 4.17078   | 3.21804   | No change |
| NM_183000 | Accn3         | 0 | 1 | 0.723908    | 0.64597   | 1.03509   | No change |
| NM_183017 | Ttl12         | 0 | 1 | 0.175694    | 2.51412   | 2.70406   | No change |
| NM_183022 | Accn4         | 0 | 1 | -3.05607    | 0.210394  | 0         | No change |
| NM_183023 | Rims4         | 0 | 1 | -1.47111    | 0.418828  | 0.0862872 | No change |
| NM_183026 | Defb14        | 0 | 1 | -0.623111   | 1.90072   | 1.08774   | No change |
| NM_183029 | Igf2bp2       | 0 | 1 | 0.698817    | 0.125122  | 0.202539  | No change |
| NM_183031 | Gpr183        | 0 | 1 | 0.386873    | 1.68192   | 2.09858   | No change |
| NM_183035 | Defb34        | 0 | 1 | 1.00694     | 1.69983   | 3.502     | No change |
| NM_183036 | Defb38        | 0 | 1 | -0.505055   | 15.2453   | 10.0956   | No change |
| NM_183039 | Defb40        | 0 | 1 | 0.177985    | 5.87772   | 6.34298   | No change |
| NM_183087 | Fam189a1      | 0 | 1 | 0.298279    | 0.630374  | 0.739957  | No change |
| NM_183116 | 1110021L09Rik | 0 | 1 | 0.470789    | 1.37568   | 1.82198   | No change |
| NM_183126 | 6030498E09Rik | 0 | 1 | -2.20807    | 0.235449  | 0         | No change |
| NM_183137 | 2410002I01Rik | 0 | 1 | -0.245395   | 4.63951   | 3.72001   | No change |
| NM_183147 | Sprn          | 0 | 1 | 2.69882     | 0         | 0.113737  | No change |
| NM_183149 | Zfp598        | 0 | 1 | -0.114173   | 7.23009   | 6.3557    | No change |
| NM_183152 | Plk5          | 0 | 1 | -0.886145   | 0.23099   | 0.101976  | No change |
| NM_183155 | BC002230      | 0 | 1 | -0.043014   | 6.18365   | 5.71153   | No change |
| NM_183158 | Cyp2ab1       | 0 | 1 | -1.88615    | 0.178373  | 0.026249  | No change |
| NM_183162 | BC006779      | 0 | 1 | -0.0319961  | 1.06859   | 0.994236  | No change |
| NM_183163 | Rhbdl2        | 0 | 1 | 0.649908    | 1.08806   | 1.65172   | No change |
| NM_183168 | P2ry6         | 0 | 1 | -0.543257   | 1.45421   | 0.936241  | No change |
| NM_183171 | Fez1          | 0 | 1 | -0.574201   | 1.5186    | 0.949764  | No change |
| NM_183173 | Ankrd43       | 0 | 1 | -0.886145   | 0.0577885 | 0.0198427 | No change |
| NM_183177 | Zfp811        | 0 | 1 | 1.55443     | 0.191027  | 0.590332  | No change |
| NM_183178 | Fsd1          | 0 | 1 | -0.301183   | 0.279091  | 0.205352  | No change |
| NM_183180 | Tspan18       | 0 | 1 | -0.557522   | 0.780353  | 0.497618  | No change |
| NM_183186 | Foxn3         | 0 | 1 | 0.24698     | 7.98092   | 9.01855   | No change |
| NM_183187 | Fam107a       | 0 | 1 | -0.234068   | 1.21918   | 0.981874  | No change |
| NM_183189 | Krtap13-1     | 0 | 1 | 0.113855    | 0         | 0         | No change |
| NM_183193 | Foxi2         | 0 | 1 | 0.113855    | 0         | 0         | No change |
| NM_183197 | Serpinc9f     | 0 | 1 | -1.47111    | 0.0730534 | 0         | No change |
| NM_183201 | Sfn5          | 0 | 1 | 0.16094     | 2.44373   | 2.60121   | No change |
| NM_183204 | Rnf182        | 0 | 1 | -2.88615    | 0.14116   | 0         | No change |
| NM_183209 | Gprn2         | 0 | 1 | 0.85082     | 0.217654  | 0.403572  | No change |
| NM_183216 | Scd4          | 0 | 1 | 0.037906    | 0.862087  | 0.8413    | No change |
| NM_183225 | Usp24         | 0 | 1 | 0.0152759   | 6.36381   | 6.12197   | No change |
| NM_183249 | 1100001G20Rik | 0 | 1 | 0.113855    | 0         | 0         | No change |
| NM_183250 | Ccdc72        | 0 | 1 | -0.0582223  | 64.1131   | 58.6049   | No change |
| NM_183253 | Defa21        | 0 | 1 | 0.113855    | 0         | 0         | No change |
| NM_183257 | Hamp2         | 0 | 1 | -1.47111    | 0.318961  | 0         | No change |
| NM_183259 | 2210020M01Rik | 0 | 1 | 0.376889    | 4.74505   | 5.88075   | No change |
| NM_183263 | Rnmt1         | 0 | 1 | -0.164446   | 2.61582   | 2.21339   | No change |
| NM_183264 | 5830405N20Rik | 0 | 1 | -1.10854    | 0.246846  | 0.0847591 | No change |
| NM_183268 | Defa20        | 0 | 1 | 0.113855    | 0         | 0         | No change |
| NM_183270 | Chchd8        | 0 | 1 | -0.0342438  | 10.1949   | 9.46883   | No change |
| NM_183276 | Nbeal2        | 0 | 1 | 0.291853    | 1.55964   | 1.81863   | No change |
| NM_183278 | Fam25c        | 0 | 1 | 1.11385     | 0         | 0.195616  | No change |
| NM_183283 | 2310010M20Rik | 0 | 1 | -0.886145   | 0.275031  | 0.113324  | No change |
| NM_183285 | Kctd2         | 0 | 1 | -0.108538   | 6.3142    | 5.56929   | No change |
| NM_183286 | Dhrs13        | 0 | 1 | -0.65168    | 1.31873   | 0.782126  | No change |
| NM_183288 | Arhgap27      | 0 | 1 | 1.35486     | 0.332188  | 0.855469  | No change |
| NM_183289 | Tcerg11       | 0 | 1 | -0.301183   | 0.0813853 | 0.0558902 | No change |
| NM_183296 | Krtap16-10    | 0 | 1 | -0.886145   | 0.122268  | 0         | No change |
| NM_183298 | Foxe1         | 0 | 1 | 0.113855    | 0         | 0         | No change |
| NM_183309 | Gm5111        | 0 | 1 | -2.47111    | 0.361478  | 0         | No change |
| NM_183311 | Tmem145       | 0 | 1 | 0.113855    | 0         | 0         | No change |
| NM_183312 | Synm          | 0 | 1 | 0.127275    | 4.94167   | 5.13815   | No change |
| NM_183315 | Ctxn1         | 0 | 1 | 0.113855    | 3.01283   | 3.10352   | No change |
| NM_183316 | Snappc5       | 0 | 1 | 0.0497245   | 10.4402   | 10.2828   | No change |
| NM_183321 | BC053749      | 0 | 1 | -0.54911    | 2.11961   | 1.36828   | No change |
| NM_183322 | Khdc1a        | 0 | 1 | 1.69882     | 0         | 0.0736318 | No change |
| NM_183358 | Gadd45gip1    | 0 | 1 | -0.02587    | 15.6347   | 14.6149   | No change |
| NM_183389 | Duxbl         | 0 | 1 | 0.85082     | 0.0693462 | 0.142868  | No change |
| NM_183391 | Tnfsf18       | 0 | 1 | 0.698817    | 0.033766  | 0.0695649 | No change |
| NM_183392 | Nup54         | 0 | 1 | 0.23043     | 6.00698   | 6.71116   | No change |
| NM_183424 | Qrpf          | 0 | 1 | -0.65482    | 1.09542   | 0.651961  | No change |
| NM_183426 | Sbno2         | 0 | 1 | -0.00465966 | 4.74633   | 4.50241   | No change |
| NM_183427 | Glra2         | 0 | 1 | 0.113855    | 0         | 0         | No change |
| NM_184052 | Igf1          | 0 | 1 | 0.21339     | 0.833494  | 0.924631  | No change |
| NM_184109 | Rtl1          | 0 | 1 | -0.208073   | 0.18638   | 0.15085   | No change |
| NM_194057 | Ffar1         | 0 | 1 | -1.88615    | 0.231538  | 0         | No change |

|           |               |   |   |             |           |           |           |
|-----------|---------------|---|---|-------------|-----------|-----------|-----------|
| NM_194058 | Nlrp9b        | 0 | 1 | 0.625355    | 0.958695  | 1.41693   | No change |
| NM_194059 | Nanos3        | 0 | 1 | -1.00162    | 1.14564   | 0.491719  | No change |
| NM_194060 | Foxo6         | 0 | 1 | -0.886145   | 0.192979  | 0.085195  | No change |
| NM_194063 | Rhox3a        | 0 | 1 | -2.88615    | 0.465506  | 0         | No change |
| NM_194064 | Nanos2        | 0 | 1 | -1.88615    | 0.145295  | 0         | No change |
| NM_194262 | Arid4b        | 0 | 1 | 0.0938917   | 10.7879   | 10.9597   | No change |
| NM_194268 | Onecut2       | 0 | 1 | -2.6935     | 0.0312268 | 0         | No change |
| NM_194336 | Gbp6          | 0 | 1 | -0.200781   | 2.37369   | 1.96277   | No change |
| NM_194340 | C330019G07Rik | 0 | 1 | -0.00628982 | 11.0758   | 10.497    | No change |
| NM_194346 | Rnf31         | 0 | 1 | 0.309775    | 2.24683   | 2.65421   | No change |
| NM_194347 | AY358078      | 0 | 1 | 0.435783    | 1.66958   | 2.16208   | No change |
| NM_194350 | Mafa          | 0 | 1 | 1.11385     | 0         | 0.0664731 | No change |
| NM_194357 | Rya3          | 0 | 1 | -1.47111    | 0.191359  | 0.0394239 | No change |
| NM_194444 | Cdk10         | 0 | 1 | -0.0741349  | 9.51735   | 8.60066   | No change |
| NM_197889 | Irfz          | 0 | 1 | 0.868742    | 0.715044  | 1.27672   | No change |
| NM_197940 | Wipf2         | 0 | 1 | -0.0319961  | 1.90097   | 1.769     | No change |
| NM_197943 | Sgsm2         | 0 | 1 | 0.0531589   | 7.80385   | 7.70697   | No change |
| NM_197944 | Hsh2d         | 0 | 1 | 0.113855    | 0         | 0         | No change |
| NM_197945 | Prosapip1     | 0 | 1 | -0.00689735 | 2.25458   | 2.1346    | No change |
| NM_197980 | Cox19         | 0 | 1 | -0.0267435  | 12.7297   | 11.8865   | No change |
| NM_197986 | Tmem140       | 0 | 1 | 0.301482    | 2.85277   | 3.35061   | No change |
| NM_197992 | Pcgf1         | 0 | 1 | 0.300268    | 2.23273   | 2.6285    | No change |
| NM_197995 | Arl16         | 0 | 1 | 0.397648    | 3.92733   | 4.93275   | No change |
| NM_197999 | Ces2g         | 0 | 1 | -0.471108   | 0.633794  | 0.426879  | No change |
| NM_198017 | Fam175b       | 0 | 1 | -0.0633189  | 10.1937   | 9.28417   | No change |
| NM_198019 | Cep78         | 0 | 1 | -0.340711   | 6.04242   | 4.53446   | No change |
| NM_198021 | Scyl2         | 0 | 1 | 0.152458    | 17.9564   | 18.9992   | No change |
| NM_198023 | Rcor1         | 0 | 1 | -0.0880088  | 8.01392   | 7.17382   | No change |
| NM_198027 | Alkbh6        | 0 | 1 | 0.457809    | 5.67868   | 7.44499   | No change |
| NM_198094 | Brd4          | 0 | 1 | 0.28554     | 4.61898   | 5.36264   | No change |
| NM_198095 | Bst2          | 0 | 1 | 0.361165    | 11.0999   | 13.5897   | No change |
| NM_198100 | Tbkbp1        | 0 | 1 | -0.0787903  | 0.480641  | 0.430531  | No change |
| NM_198101 | Gmip          | 0 | 1 | -0.124932   | 1.02986   | 0.896244  | No change |
| NM_198102 | Tra2a         | 0 | 1 | 0.0531526   | 34.1983   | 33.7747   | No change |
| NM_198112 | Ostn          | 0 | 1 | 0.113855    | 0         | 0         | No change |
| NM_198114 | Dagla         | 0 | 1 | 0.0195274   | 0.964865  | 0.930199  | No change |
| NM_198119 | Lrrc24        | 0 | 1 | -0.788848   | 1.53734   | 0.829518  | No change |
| NM_198166 | Uts2d         | 0 | 1 | 0.113855    | 0         | 0         | No change |
| NM_198169 | Gmeb2         | 0 | 1 | -0.0224109  | 3.99229   | 3.74022   | No change |
| NM_198170 | Szt2          | 0 | 1 | 0.171062    | 2.82513   | 3.02816   | No change |
| NM_198171 | Ces2b         | 0 | 1 | -1.47111    | 0.0735546 | 0         | No change |
| NM_198190 | Ntf5          | 0 | 1 | 0.658175    | 0.816575  | 1.24345   | No change |
| NM_198192 | Qrfpr         | 0 | 1 | 0.113855    | 0         | 0         | No change |
| NM_198193 | Raet1e        | 0 | 1 | -1.20807    | 0.218816  | 0.0563508 | No change |
| NM_198214 | Snpb          | 0 | 1 | 0.537663    | 0.594523  | 0.826767  | No change |
| NM_198246 | Yars2         | 0 | 1 | -0.100884   | 4.08409   | 3.61895   | No change |
| NM_198296 | 9130011E15Rik | 0 | 1 | 0.299646    | 5.0537    | 5.92474   | No change |
| NM_198297 | Tra1          | 0 | 1 | -0.471108   | 0.509451  | 0.314873  | No change |
| NM_198298 | Helz          | 0 | 1 | -0.120412   | 4.77472   | 4.17953   | No change |
| NM_198305 | Klhl17        | 0 | 1 | 0.244187    | 6.33572   | 7.14575   | No change |
| NM_198308 | Pdpr          | 0 | 1 | -0.125436   | 5.47176   | 4.77123   | No change |
| NM_198322 | Zfp273        | 0 | 1 | 0.218191    | 3.57323   | 3.95917   | No change |
| NM_198408 | Crhbp         | 0 | 1 | 0.791927    | 0.165837  | 0.298951  | No change |
| NM_198410 | Paqr6         | 0 | 1 | 0.113855    | 2.37874   | 2.45035   | No change |
| NM_198411 | Inf2          | 0 | 1 | 0.38037     | 1.03002   | 1.27947   | No change |
| NM_198422 | Paqr3         | 0 | 1 | 0.342124    | 3.49732   | 4.22914   | No change |
| NM_198423 | Bahcc1        | 0 | 1 | 0.489364    | 0.474278  | 0.635792  | No change |
| NM_198425 | Eid2          | 0 | 1 | 0.20027     | 4.32875   | 4.73776   | No change |
| NM_198599 | Map6d1        | 0 | 1 | -0.22318    | 0.489596  | 0.394697  | No change |
| NM_198604 | Plekhg6       | 0 | 1 | 0.698817    | 0.392441  | 0.618273  | No change |
| NM_198606 | Dcaf13        | 0 | 1 | 0.287186    | 6.33161   | 7.36079   | No change |
| NM_198609 | Rsl24d1       | 0 | 1 | 0.145448    | 12.3634   | 13.0186   | No change |
| NM_198610 | Igsf21        | 0 | 1 | -1.88615    | 0.104539  | 0         | No change |
| NM_198613 | Ap2s1         | 0 | 1 | 0.145967    | 27.0737   | 28.5185   | No change |
| NM_198617 | Tspyl3        | 0 | 1 | 0.396255    | 0.816714  | 1.02826   | No change |
| NM_198625 | Mtss1l        | 0 | 1 | 0.225748    | 1.82039   | 2.02765   | No change |
| NM_198626 | Al480653      | 0 | 1 | 0.393237    | 2.59864   | 3.25379   | No change |
| NM_198627 | Vstm2l        | 0 | 1 | -2.88615    | 0.357924  | 0         | No change |
| NM_198631 | Zc3h4         | 0 | 1 | -0.0947318  | 4.18089   | 3.7254    | No change |
| NM_198632 | Trim67        | 0 | 1 | 0.891462    | 0.102862  | 0.187465  | No change |
| NM_198633 | Gm5124        | 0 | 1 | 1.69882     | 0.0353412 | 0.182026  | No change |
| NM_198634 | Tigd3         | 0 | 1 | -1.60235    | 0.724938  | 0.203662  | No change |
| NM_198642 | 5031414D18Rik | 0 | 1 | 0.265858    | 0.446918  | 0.514534  | No change |
| NM_198647 | Tbc1d22b      | 0 | 1 | -0.26012    | 2.51541   | 1.99476   | No change |
| NM_198650 | Slc22a20      | 0 | 1 | 1.11385     | 0         | 0.0378445 | No change |
| NM_198658 | Nr1h5         | 0 | 1 | -0.0705698  | 0.589993  | 0.531785  | No change |



|           |               |   |   |            |           |           |           |
|-----------|---------------|---|---|------------|-----------|-----------|-----------|
| NM_198661 | Oog2          | 0 | 1 | 0.113855   | 0         | 0         | No change |
| NM_198662 | 9430007A20Rik | 0 | 1 | 0.113855   | 0         | 0         | No change |
| NM_198663 | C87499        | 0 | 1 | 0.113855   | 0         | 0         | No change |
| NM_198664 | Tbc1d2        | 0 | 1 | 0.159514   | 5.01854   | 5.33638   | No change |
| NM_198669 | Prb1          | 0 | 1 | 0.113855   | 0         | 0         | No change |
| NM_198674 | Fbxw26        | 0 | 1 | -1.62311   | 0.34388   | 0.0787182 | No change |
| NM_198675 | Fdxacb1       | 0 | 1 | -0.187526  | 4.26332   | 3.55688   | No change |
| NM_198680 | Serpib3b      | 0 | 1 | 0.113855   | 0         | 0         | No change |
| NM_198858 | Ctf2          | 0 | 1 | 0.85082    | 0.154873  | 0.319071  | No change |
| NM_198861 | BC046404      | 0 | 1 | -0.157447  | 4.88272   | 4.16127   | No change |
| NM_198864 | Slitr3        | 0 | 1 | 1.11385    | 0.0373488 | 0.096183  | No change |
| NM_198927 | Smgc          | 0 | 1 | 0.113855   | 0         | 0         | No change |
| NM_198960 | Tcfap2e       | 0 | 1 | 1.11385    | 0         | 0.0339117 | No change |
| NM_198961 | Vmn2r43       | 0 | 1 | 1.11385    | 0         | 0.0252696 | No change |
| NM_198962 | Hctr2         | 0 | 1 | 0.113855   | 0         | 0         | No change |
| NM_198967 | Tmtc1         | 0 | 1 | -0.0164532 | 3.66585   | 3.44934   | No change |
| NM_199008 | Cox11         | 0 | 1 | -0.348879  | 5.02875   | 3.75004   | No change |
| NM_199011 | Dgkq          | 0 | 1 | 0.243673   | 4.70753   | 5.30732   | No change |
| NM_199015 | D14Ert668e    | 0 | 1 | -0.0594768 | 1.34923   | 1.22948   | No change |
| NM_199025 | Zbtb26        | 0 | 1 | 0.207791   | 4.31363   | 4.74336   | No change |
| NM_199027 | Zfp335        | 0 | 1 | 0.0906971  | 4.77328   | 4.83843   | No change |
| NM_199028 | Bend3         | 0 | 1 | 0.243138   | 1.46322   | 1.64969   | No change |
| NM_199036 | Fbxw15        | 0 | 1 | -0.14918   | 0.233087  | 0.192083  | No change |
| NM_199055 | Chst9         | 0 | 1 | -0.345577  | 0.509079  | 0.367083  | No change |
| NM_199056 | Ippk          | 0 | 1 | 0.276738   | 6.27638   | 7.24116   | No change |
| NM_199058 | Gpr6          | 0 | 1 | 0.113855   | 0         | 0         | No change |
| NM_199059 | Tbpl2         | 0 | 1 | -0.886145  | 0.0505388 | 0         | No change |
| NM_199063 | Ssx9          | 0 | 1 | 0.113855   | 0.115386  | 0.118859  | No change |
| NM_199064 | Ssxb10        | 0 | 1 | -1.88615   | 0.238402  | 0         | No change |
| NM_199065 | Slitrk1       | 0 | 1 | -0.886145  | 0.0819724 | 0.033776  | No change |
| NM_199066 | Ssxb9         | 0 | 1 | 0.336247   | 0.397337  | 0.491158  | No change |
| NM_199067 | Defb50        | 0 | 1 | 0.698817   | 0.186844  | 0.384938  | No change |
| NM_199068 | Foxk1         | 0 | 1 | -0.209649  | 2.13403   | 1.75476   | No change |
| NM_199148 | BC051665      | 0 | 1 | 0.113855   | 0         | 0         | No change |
| NM_199153 | Tas2r102      | 0 | 1 | 0.113855   | 0         | 0         | No change |
| NM_199154 | Tas2r107      | 0 | 1 | 0.113855   | 0         | 0         | No change |
| NM_199155 | Tas2r110      | 0 | 1 | 0.113855   | 0         | 0         | No change |
| NM_199156 | Tas2r130      | 0 | 1 | 0.113855   | 0         | 0         | No change |
| NM_199157 | Ilnk          | 0 | 1 | -0.886145  | 0.254974  | 0.08755   | No change |
| NM_199158 | Tas2r134      | 0 | 1 | 0.113855   | 0         | 0         | No change |
| NM_199159 | Tas2r135      | 0 | 1 | 0.113855   | 0.216438  | 0.222953  | No change |
| NM_199197 | Rbfa          | 0 | 1 | 0.265858   | 9.31668   | 10.6695   | No change |
| NM_199199 | Tmem199       | 0 | 1 | 0.203122   | 14.5821   | 15.9832   | No change |
| NM_199201 | Cd300h        | 0 | 1 | -0.0787903 | 2.172     | 1.94555   | No change |
| NM_199221 | Cd300b        | 0 | 1 | 0.113855   | 0.0483979 | 0.0498548 | No change |
| NM_199222 | Lman1l        | 0 | 1 | 1.11385    | 0         | 0.0413304 | No change |
| NM_199223 | Rtn4r12       | 0 | 1 | -1.47111   | 0.275902  | 0.0568416 | No change |
| NM_199225 | Cd300c        | 0 | 1 | 1.11385    | 0         | 0.104045  | No change |
| NM_199251 | Kcnk12        | 0 | 1 | -1.47111   | 0.0714067 | 0         | No change |
| NM_199301 | Mtg1          | 0 | 1 | 0.587786   | 1.52931   | 2.20549   | No change |
| NM_199303 | Bpil3         | 0 | 1 | 0.113855   | 0         | 0         | No change |
| NM_199304 | Zfp341        | 0 | 1 | 0.980588   | 0.345871  | 0.66803   | No change |
| NM_199307 | Ece1          | 0 | 1 | 0.102884   | 3.80591   | 3.89067   | No change |
| NM_199311 | Clec4a1       | 0 | 1 | -1.26466   | 0.536788  | 0.184316  | No change |
| NM_199317 | Phf16         | 0 | 1 | -0.101534  | 7.69667   | 6.82479   | No change |
| NM_199319 | Ssxb5         | 0 | 1 | 0.28378    | 0.810383  | 0.954033  | No change |
| NM_199364 | Lzts1         | 0 | 1 | 0.00423032 | 1.54873   | 1.4757    | No change |
| NM_199366 | Gal3st2       | 0 | 1 | 0.00138008 | 0.955033  | 0.908108  | No change |
| NM_199422 | S100a7a       | 0 | 1 | 1.11385    | 0         | 0.0968839 | No change |
| NM_199448 | Fez2          | 0 | 1 | 0.272921   | 5.90804   | 6.79967   | No change |
| NM_199465 | Nexn          | 0 | 1 | 0.00243353 | 3.99566   | 3.80795   | No change |
| NM_199467 | Mms22l        | 0 | 1 | -0.364192  | 1.20187   | 0.884323  | No change |
| NM_199468 | Zcchc5        | 0 | 1 | -0.471108  | 0.0472975 | 0.0243607 | No change |
| NM_199473 | Col8a2        | 0 | 1 | 0.380641   | 2.04364   | 2.53614   | No change |
| NM_201226 | Lrrc47        | 0 | 1 | -0.206802  | 11.6189   | 9.57918   | No change |
| NM_201236 | Rhox4e        | 0 | 1 | -0.886145  | 0.0713336 | 0         | No change |
| NM_201244 | Copg          | 0 | 1 | 0.379749   | 6.5958    | 8.18597   | No change |
| NM_201255 | Krt9          | 0 | 1 | 0.113855   | 0         | 0         | No change |
| NM_201256 | Eif4ebp3      | 0 | 1 | 0.500878   | 4.66234   | 6.29964   | No change |
| NM_201258 | Oog3          | 0 | 1 | 0.113855   | 0         | 0         | No change |
| NM_201351 | Cybas3        | 0 | 1 | -0.22318   | 5.15944   | 4.20172   | No change |
| NM_201354 | Ctif          | 0 | 1 | 0.0878596  | 0.620245  | 0.6273    | No change |
| NM_201355 | Nat14         | 0 | 1 | -0.886145  | 0.994378  | 0.489889  | No change |
| NM_201358 | Lym4          | 0 | 1 | 0.209614   | 4.6462    | 5.11777   | No change |
| NM_201360 | Cyp2d12       | 0 | 1 | 0.113855   | 0         | 0         | No change |
| NM_201362 | Ccdc68        | 0 | 1 | 0.403361   | 0.365602  | 0.47076   | No change |

|           |           |   |   |            |           |           |           |
|-----------|-----------|---|---|------------|-----------|-----------|-----------|
| NM_201363 | Serpinb3c | 0 | 1 | 0.113855   | 0         | 0         | No change |
| NM_201366 | Gm1631    | 0 | 1 | 0.113855   | 0         | 0         | No change |
| NM_201367 | Gpr176    | 0 | 1 | 0.28378    | 0.124738  | 0.146849  | No change |
| NM_201369 | N4bp2l2   | 0 | 1 | 0.0600568  | 15.8926   | 15.7715   | No change |
| NM_201370 | Wee2      | 0 | 1 | -1.01168   | 0.555418  | 0.248756  | No change |
| NM_201371 | Prmt8     | 0 | 1 | -0.471108  | 0.0703614 | 0.0362398 | No change |
| NM_201373 | Trim56    | 0 | 1 | 0.269974   | 3.33422   | 3.82938   | No change |
| NM_201376 | Serpinb3d | 0 | 1 | 0.113855   | 0         | 0         | No change |
| NM_201406 | Pigs      | 0 | 1 | -0.0363209 | 7.33905   | 6.80975   | No change |
| NM_201409 | Dub1a     | 0 | 1 | 1.11385    | 0         | 0.0510241 | No change |
| NM_201410 | Ugt1a6b   | 0 | 1 | 0.0869651  | 21.3668   | 21.603    | No change |
| NM_201411 | Flrt1     | 0 | 1 | -0.203885  | 1.01073   | 0.832927  | No change |
| NM_201519 | Map4k5    | 0 | 1 | -0.0876757 | 10.9061   | 9.7677    | No change |
| NM_201607 | Pde4c     | 0 | 1 | 0.616355   | 0.763938  | 1.12419   | No change |
| NM_201608 | H2-M10.3  | 0 | 1 | 0.113855   | 0         | 0         | No change |
| NM_201611 | H2-M10.6  | 0 | 1 | 1.69882    | 0         | 0.102194  | No change |
| NM_201615 | Prhr      | 0 | 1 | 0.113855   | 0         | 0         | No change |
| NM_201638 | Mettl14   | 0 | 1 | 0.225138   | 5.60198   | 6.23556   | No change |
| NM_201640 | Cyp4a31   | 0 | 1 | 0.113855   | 0         | 0         | No change |
| NM_201641 | Ugt1a10   | 0 | 1 | 0.0562895  | 12.6187   | 12.4892   | No change |
| NM_201642 | Ugt1a7c   | 0 | 1 | 0.0216384  | 13.6466   | 13.1857   | No change |
| NM_201643 | Ugt1a5    | 0 | 1 | 0.0527663  | 13.0783   | 12.9125   | No change |
| NM_201644 | Ugt1a9    | 0 | 1 | 0.053838   | 12.7424   | 12.5902   | No change |
| NM_201645 | Ugt1a1    | 0 | 1 | 0.10202    | 13.1875   | 13.4733   | No change |
| NM_203319 | Dhx37     | 0 | 1 | -0.225632  | 3.11355   | 2.53115   | No change |
| NM_203320 | Cxcl3     | 0 | 1 | 0.113855   | 0         | 0         | No change |
| NM_203396 | Fam115e   | 0 | 1 | 0.113855   | 0         | 0         | No change |
| NM_203489 | Vmn1r183  | 0 | 1 | 0.113855   | 0         | 0         | No change |
| NM_203490 | Mrgprd    | 0 | 1 | 0.113855   | 0         | 0         | No change |
| NM_203491 | Chrm2     | 0 | 1 | -1.47111   | 0.273843  | 0.0705216 | No change |
| NM_203492 | Mrgprg    | 0 | 1 | 0.113855   | 0         | 0         | No change |
| NM_203507 | Rwdd4a    | 0 | 1 | -0.107879  | 8.59357   | 7.58766   | No change |
| NM_205769 | Crh       | 0 | 1 | 0.113855   | 0         | 0         | No change |
| NM_205783 | Chrm5     | 0 | 1 | 0.599282   | 0.159663  | 0.246704  | No change |
| NM_205795 | Mrgprb4   | 0 | 1 | 1.11385    | 0         | 0.0743178 | No change |
| NM_205810 | Mrgprb1   | 0 | 1 | 0.113855   | 0         | 0         | No change |
| NM_205819 | Tlr11     | 0 | 1 | -1.53      | 0.528979  | 0.15893   | No change |
| NM_205820 | Tlr13     | 0 | 1 | 0.544489   | 0.781311  | 1.09099   | No change |
| NM_205821 | Mrgpra6   | 0 | 1 | -0.471108  | 0.385044  | 0.237981  | No change |
| NM_205822 | Omt2b     | 0 | 1 | 0.113855   | 0         | 0         | No change |
| NM_205823 | Tlr12     | 0 | 1 | -0.137684  | 0.526979  | 0.452369  | No change |
| NM_205844 | Gfral     | 0 | 1 | 0.113855   | 0         | 0         | No change |
| NM_206535 | Cd200r2   | 0 | 1 | -0.886145  | 0.0398245 | 0         | No change |
| NM_206537 | Cyp2c54   | 0 | 1 | 0.113855   | 0         | 0         | No change |
| NM_206822 | Olf10     | 0 | 1 | 0.113855   | 0         | 0         | No change |
| NM_206823 | Olf153    | 0 | 1 | 0.113855   | 0         | 0         | No change |
| NM_206867 | Gm13280   | 0 | 1 | 0.113855   | 0         | 0         | No change |
| NM_206868 | Vmn1r178  | 0 | 1 | 0.113855   | 0         | 0         | No change |
| NM_206869 | Vmn1r180  | 0 | 1 | 0.113855   | 0         | 0         | No change |
| NM_206870 | Gm12597   | 0 | 1 | 0.113855   | 0         | 0         | No change |
| NM_206871 | Ifna6     | 0 | 1 | 0.113855   | 0         | 0         | No change |
| NM_206872 | Vmn1r177  | 0 | 1 | 0.113855   | 0         | 0         | No change |
| NM_206896 | Olf12     | 0 | 1 | 0.113855   | 0         | 0         | No change |
| NM_206897 | Olf16     | 0 | 1 | 0.113855   | 0         | 0         | No change |
| NM_206903 | Olf13     | 0 | 1 | 0.113855   | 0         | 0         | No change |
| NM_206973 | Gpr152    | 0 | 1 | -1.20807   | 0.0710428 | 0.0182954 | No change |
| NM_206975 | Ifna14    | 0 | 1 | 0.113855   | 0         | 0         | No change |
| NM_207000 | H2afy2    | 0 | 1 | 0.225965   | 3.57587   | 3.98421   | No change |
| NM_207008 | Olf1773   | 0 | 1 | -0.886145  | 0.0744583 | 0         | No change |
| NM_207011 | Tas2r104  | 0 | 1 | 0.113855   | 0         | 0         | No change |
| NM_207016 | Tas2r106  | 0 | 1 | 0.113855   | 0         | 0         | No change |
| NM_207017 | Tas2r109  | 0 | 1 | 0.113855   | 0         | 0         | No change |
| NM_207018 | Tas2r113  | 0 | 1 | 0.113855   | 0         | 0         | No change |
| NM_207019 | Tas2r114  | 0 | 1 | 0.113855   | 0         | 0         | No change |
| NM_207020 | Tas2r115  | 0 | 1 | 0.113855   | 0         | 0         | No change |
| NM_207021 | Tas2r117  | 0 | 1 | -0.886145  | 0.0701842 | 0         | No change |
| NM_207022 | Tas2r118  | 0 | 1 | 0.113855   | 0         | 0         | No change |
| NM_207023 | Tas2r120  | 0 | 1 | 0.113855   | 0         | 0         | No change |
| NM_207024 | Tas2r121  | 0 | 1 | 0.113855   | 0         | 0         | No change |
| NM_207025 | Tas2r123  | 0 | 1 | -0.886145  | 0.0695538 | 0         | No change |
| NM_207026 | Tas2r124  | 0 | 1 | 0.113855   | 0         | 0         | No change |
| NM_207027 | Tas2r125  | 0 | 1 | 0.113855   | 0         | 0         | No change |
| NM_207028 | Tas2r126  | 0 | 1 | 0.698817   | 0.0751812 | 0.154889  | No change |
| NM_207029 | Tas2r129  | 0 | 1 | 0.113855   | 0         | 0         | No change |
| NM_207030 | Tas2r131  | 0 | 1 | 0.113855   | 0         | 0         | No change |
| NM_207031 | Ano7      | 0 | 1 | 1.11385    | 0.0433279 | 0.111581  | No change |

|           |               |   |   |            |           |           |           |
|-----------|---------------|---|---|------------|-----------|-----------|-----------|
| NM_207131 | Cebpe         | 0 | 1 | -1.47111   | 0.11259   | 0         | No change |
| NM_207132 | Olfr1471      | 0 | 1 | 0.113855   | 0         | 0         | No change |
| NM_207133 | Olfr741       | 0 | 1 | 0.113855   | 0         | 0         | No change |
| NM_207134 | Olfr1061      | 0 | 1 | 0.113855   | 0         | 0         | No change |
| NM_207135 | Olfr1084      | 0 | 1 | 0.113855   | 0         | 0         | No change |
| NM_207136 | Olfr1349      | 0 | 1 | 1.11385    | 0.0730534 | 0.225758  | No change |
| NM_207137 | Olfr417       | 0 | 1 | 0.113855   | 0         | 0         | No change |
| NM_207138 | Olfr149       | 0 | 1 | 0.113855   | 0         | 0         | No change |
| NM_207139 | Olfr936       | 0 | 1 | 0.113855   | 0         | 0         | No change |
| NM_207140 | Olfr1212      | 0 | 1 | 0.113855   | 0         | 0         | No change |
| NM_207141 | Olfr955       | 0 | 1 | 0.113855   | 0         | 0         | No change |
| NM_207142 | Olfr1036      | 0 | 1 | -0.471108  | 0.137326  | 0.07073   | No change |
| NM_207143 | Olfr594       | 0 | 1 | 0.113855   | 0         | 0         | No change |
| NM_207144 | Olfr645       | 0 | 1 | 0.113855   | 0         | 0         | No change |
| NM_207145 | Olfr845       | 0 | 1 | 0.113855   | 0         | 0         | No change |
| NM_207146 | Olfr670       | 0 | 1 | 1.69882    | 0         | 0.152909  | No change |
| NM_207147 | Olfr813       | 0 | 1 | 0.113855   | 0         | 0         | No change |
| NM_207149 | Olfr1010      | 0 | 1 | -0.886145  | 0.0738273 | 0         | No change |
| NM_207150 | Olfr1313      | 0 | 1 | -0.886145  | 0.0744583 | 0         | No change |
| NM_207151 | Olfr1308      | 0 | 1 | 0.113855   | 0         | 0         | No change |
| NM_207152 | Olfr1338      | 0 | 1 | 0.661343   | 1.8496    | 2.81982   | No change |
| NM_207153 | Olfr325       | 0 | 1 | -2.47111   | 0.33474   | 0         | No change |
| NM_207154 | Olfr1102      | 0 | 1 | 0.113855   | 0         | 0         | No change |
| NM_207155 | Olfr117       | 0 | 1 | 0.113855   | 0         | 0         | No change |
| NM_207156 | Olfr747       | 0 | 1 | 0.113855   | 0         | 0         | No change |
| NM_207157 | Olfr1333      | 0 | 1 | -0.886145  | 0.0730534 | 0         | No change |
| NM_207158 | Olfr427       | 0 | 1 | 0.113855   | 0         | 0         | No change |
| NM_207159 | Olfr814       | 0 | 1 | 0.113855   | 0         | 0         | No change |
| NM_207160 | Olfr519       | 0 | 1 | 0.113855   | 0         | 0         | No change |
| NM_207161 | BC048355      | 0 | 1 | 0.0313927  | 2.20547   | 2.14205   | No change |
| NM_207175 | Olfr239       | 0 | 1 | 0.113855   | 0         | 0         | No change |
| NM_207201 | Olfr8         | 0 | 1 | 0.113855   | 0         | 0         | No change |
| NM_207203 | BC068157      | 0 | 1 | -0.933451  | 0.452944  | 0.217737  | No change |
| NM_207208 | Cica6         | 0 | 1 | 0.113855   | 0.0697394 | 0.0718389 | No change |
| NM_207212 | Wtip          | 0 | 1 | 0.113855   | 3.20509   | 3.30158   | No change |
| NM_207216 | Ugt3a1        | 0 | 1 | 1.17275    | 0.341024  | 0.766452  | No change |
| NM_207219 | Al314976      | 0 | 1 | 0.219942   | 15.2281   | 16.8883   | No change |
| NM_207221 | Jmjd1c        | 0 | 1 | -0.0615732 | 14.7335   | 13.4383   | No change |
| NM_207222 | Lmo3          | 0 | 1 | -0.886145  | 0.0331713 | 0         | No change |
| NM_207223 | Acap3         | 0 | 1 | -0.307283  | 1.26068   | 0.965649  | No change |
| NM_207224 | Olfr384       | 0 | 1 | 0.113855   | 0         | 0         | No change |
| NM_207225 | Hdac4         | 0 | 1 | 0.0939553  | 5.14868   | 5.23077   | No change |
| NM_207227 | Olfr1373      | 0 | 1 | 0.113855   | 0         | 0         | No change |
| NM_207230 | Olfr320       | 0 | 1 | 0.113855   | 0         | 0         | No change |
| NM_207231 | Arl5c         | 0 | 1 | 1.11385    | 0.446463  | 0.965798  | No change |
| NM_207233 | C1ql2         | 0 | 1 | 0.113855   | 0         | 0         | No change |
| NM_207235 | Olfr358       | 0 | 1 | 0.113855   | 0         | 0         | No change |
| NM_207236 | Olfr1283      | 0 | 1 | -1.88615   | 0.227755  | 0         | No change |
| NM_207240 | Olfr1320      | 0 | 1 | 0.113855   | 0         | 0         | No change |
| NM_207242 | Npc111        | 0 | 1 | 0.620815   | 0.274442  | 0.408349  | No change |
| NM_207243 | Muc19         | 0 | 1 | 0.113855   | 0         | 0         | No change |
| NM_207244 | Cd200r4       | 0 | 1 | 3.11385    | 0         | 0.29561   | No change |
| NM_207246 | Rasgrp3       | 0 | 1 | 0.656997   | 0.507727  | 0.769134  | No change |
| NM_207247 | Pglyrp3       | 0 | 1 | 0.113855   | 0         | 0         | No change |
| NM_207249 | Olfr684       | 0 | 1 | 0.113855   | 0         | 0         | No change |
| NM_207253 | Olfr1371      | 0 | 1 | -1.20807   | 0.297833  | 0.0766998 | No change |
| NM_207254 | Olfr1286      | 0 | 1 | -1.88615   | 0.227755  | 0         | No change |
| NM_207260 | Ankrd34c      | 0 | 1 | 0.113855   | 0         | 0         | No change |
| NM_207261 | Kcnk18        | 0 | 1 | 0.113855   | 0         | 0         | No change |
| NM_207262 | Abpe          | 0 | 1 | 0.113855   | 0         | 0         | No change |
| NM_207271 | Tdpoz3        | 0 | 1 | -0.886145  | 0.0634726 | 0         | No change |
| NM_207272 | Tdpoz4        | 0 | 1 | 0.113855   | 0         | 0         | No change |
| NM_207273 | Tdpoz5        | 0 | 1 | -0.886145  | 0.068126  | 0         | No change |
| NM_207277 | A930005I04Rik | 0 | 1 | -0.0496439 | 0.673723  | 0.616893  | No change |
| NM_207278 | Tigd4         | 0 | 1 | -0.0787903 | 0.141038  | 0.124529  | No change |
| NM_207280 | Ccdc121       | 0 | 1 | 0.113855   | 0.191569  | 0.197336  | No change |
| NM_207281 | 4832428D23Rik | 0 | 1 | -0.471108  | 0.0438183 | 0.0225687 | No change |
| NM_207298 | Cercam        | 0 | 1 | -0.572037  | 0.924105  | 0.581732  | No change |
| NM_207301 | Wrb           | 0 | 1 | 0.255707   | 7.57837   | 8.61607   | No change |
| NM_207522 | BC067068      | 0 | 1 | -0.0247504 | 4.44339   | 4.15465   | No change |
| NM_207531 | Agr3          | 0 | 1 | -2.6935    | 0.510571  | 0         | No change |
| NM_207537 | Mrgprb3       | 0 | 1 | 1.11385    | 0         | 0.0764547 | No change |
| NM_207538 | Mrgprb5       | 0 | 1 | 1.69882    | 0         | 0.148175  | No change |
| NM_207539 | Mrgprb8       | 0 | 1 | -3.20807   | 0.558536  | 0         | No change |
| NM_207540 | Mrgprx1       | 0 | 1 | 0.113855   | 0         | 0         | No change |
| NM_207543 | Vmn1r59       | 0 | 1 | 0.113855   | 0         | 0         | No change |

|           |               |   |   |           |           |           |           |
|-----------|---------------|---|---|-----------|-----------|-----------|-----------|
| NM_207544 | Vmn1r64       | 0 | 1 | 0.113855  | 0         | 0         | No change |
| NM_207545 | Vmn1r179      | 0 | 1 | 0.113855  | 0         | 0         | No change |
| NM_207547 | Vmn1r93       | 0 | 1 | -0.886145 | 0.0721459 | 0         | No change |
| NM_207548 | Vmn1r174      | 0 | 1 | 0.113855  | 0         | 0         | No change |
| NM_207549 | Olfr192       | 0 | 1 | -1.88615  | 0.226031  | 0         | No change |
| NM_207551 | Olfr209       | 0 | 1 | 0.113855  | 0         | 0         | No change |
| NM_207552 | Olfr250       | 0 | 1 | 0.113855  | 0         | 0         | No change |
| NM_207553 | Olfr251       | 0 | 1 | -0.886145 | 0.073984  | 0         | No change |
| NM_207554 | Olfr257       | 0 | 1 | -1.47111  | 0.145194  | 0         | No change |
| NM_207555 | Olfr372       | 0 | 1 | 0.113855  | 0         | 0         | No change |
| NM_207556 | Olfr592       | 0 | 1 | 0.113855  | 0         | 0         | No change |
| NM_207557 | Olfr681       | 0 | 1 | -1.47111  | 0.147032  | 0         | No change |
| NM_207558 | Olfr750       | 0 | 1 | 1.11385   | 0         | 0.0634196 | No change |
| NM_207559 | Olfr776       | 0 | 1 | 0.113855  | 0         | 0         | No change |
| NM_207560 | Olfr924       | 0 | 1 | -2.47111  | 0.375906  | 0         | No change |
| NM_207561 | Olfr1040      | 0 | 1 | 0.113855  | 0         | 0         | No change |
| NM_207562 | Olfr1051      | 0 | 1 | 0.113855  | 0         | 0         | No change |
| NM_207563 | Olfr1057      | 0 | 1 | 0.113855  | 0         | 0         | No change |
| NM_207564 | Olfr1083-ps   | 0 | 1 | 0.113855  | 0         | 0         | No change |
| NM_207565 | Olfr1113      | 0 | 1 | 0.113855  | 0         | 0         | No change |
| NM_207566 | Olfr1173      | 0 | 1 | 0.113855  | 0         | 0         | No change |
| NM_207567 | Olfr1198      | 0 | 1 | 0.113855  | 0         | 0         | No change |
| NM_207568 | Olfr1252      | 0 | 1 | 0.113855  | 0         | 0         | No change |
| NM_207571 | Olfr1355      | 0 | 1 | 0.113855  | 0         | 0         | No change |
| NM_207572 | Olfr1535      | 0 | 1 | 0.113855  | 0         | 0         | No change |
| NM_207573 | Olfr1380      | 0 | 1 | 0.113855  | 0         | 0         | No change |
| NM_207574 | Olfr1383      | 0 | 1 | 1.11385   | 0         | 0.0766998 | No change |
| NM_207575 | Olfr1480      | 0 | 1 | 0.113855  | 0         | 0         | No change |
| NM_207583 | Fam5b         | 0 | 1 | 1.43578   | 0.0509824 | 0.157552  | No change |
| NM_207618 | V1rd18        | 0 | 1 | -2.20807  | 0.240944  | 0         | No change |
| NM_207619 | V1rd19        | 0 | 1 | -2.20807  | 0.303673  | 0         | No change |
| NM_207620 | Olfr774       | 0 | 1 | 0.113855  | 0         | 0         | No change |
| NM_207621 | Olfr553       | 0 | 1 | 0.113855  | 0         | 0         | No change |
| NM_207622 | Olfr403       | 0 | 1 | 0.113855  | 0         | 0         | No change |
| NM_207626 | Olfr1434      | 0 | 1 | 0.113855  | 0         | 0         | No change |
| NM_207631 | Olfr1321      | 0 | 1 | 0.113855  | 0         | 0         | No change |
| NM_207632 | Olfr1118      | 0 | 1 | 0.113855  | 0         | 0         | No change |
| NM_207636 | Fndc3a        | 0 | 1 | -0.082569 | 38.447    | 34.5617   | No change |
| NM_207648 | H2-Q6         | 0 | 1 | 0.296508  | 11.5089   | 13.4654   | No change |
| NM_207658 | Defa22        | 0 | 1 | 0.113855  | 0         | 0         | No change |
| NM_207664 | Olfr151       | 0 | 1 | 0.113855  | 0         | 0         | No change |
| NM_207665 | Olfr1537-ps1  | 0 | 1 | 0.113855  | 0         | 0         | No change |
| NM_207666 | Dlk2          | 0 | 1 | 0.757711  | 0.682372  | 1.12466   | No change |
| NM_207673 | Olfr100       | 0 | 1 | 0.113855  | 0         | 0         | No change |
| NM_207674 | Olfr1082      | 0 | 1 | 0.113855  | 0         | 0         | No change |
| NM_207677 | Dedd2         | 0 | 1 | 0.28378   | 5.14691   | 5.96949   | No change |
| NM_207678 | Ccnl2         | 0 | 1 | 0.123173  | 13.1852   | 13.6703   | No change |
| NM_207693 | Olfr179       | 0 | 1 | 0.113855  | 0         | 0         | No change |
| NM_207694 | Olfr220       | 0 | 1 | 0.113855  | 0         | 0         | No change |
| NM_207695 | Olfr224       | 0 | 1 | 0.113855  | 0         | 0         | No change |
| NM_207703 | Olfr1335      | 0 | 1 | 0.113855  | 0         | 0         | No change |
| NM_212436 | Olfr301       | 0 | 1 | -0.886145 | 0.0744583 | 0         | No change |
| NM_212447 | Marveld3      | 0 | 1 | 0.639924  | 1.21912   | 1.8314    | No change |
| NM_212450 | Ctdspl2       | 0 | 1 | 0.033405  | 9.03171   | 8.79815   | No change |
| NM_212452 | Rxfp1         | 0 | 1 | -0.886145 | 0.0306074 | 0         | No change |
| NM_212483 | Krt42         | 0 | 1 | 0.113855  | 0         | 0         | No change |
| NM_212487 | Krt78         | 0 | 1 | -1.26466  | 0.24354   | 0.0836237 | No change |
| NM_213615 | A530032D15Rik | 0 | 1 | -0.638218 | 1.22755   | 0.734226  | No change |
| NM_213721 | Olfr118       | 0 | 1 | 0.113855  | 0         | 0         | No change |
| NM_213728 | Krt72-ps      | 0 | 1 | 0.113855  | 0         | 0         | No change |
| NM_213730 | Krt39         | 0 | 1 | -0.886145 | 0.0480973 | 0         | No change |
| NM_213733 | Npepl1        | 0 | 1 | 0.16935   | 3.35669   | 3.59468   | No change |
| NR_000002 | Snord32a      | 0 | 1 | 0.336247  | 9.46447   | 11.522    | No change |
| NR_000003 | Snord35a      | 0 | 1 | 1.43578   | 0.783067  | 3.22656   | No change |
| NR_000004 | Snord35b      | 0 | 1 | 1.11385   | 1.62077   | 4.17389   | No change |
| NR_000040 | Tyms-ps       | 0 | 1 | 0.113855  | 0.620873  | 0.639563  | No change |
| NR_001277 | Snord33       | 0 | 1 | 1.69882   | 0         | 1.751     | No change |
| NR_001461 | Kcnq1ot1      | 0 | 1 | 0.0182557 | 3.84227   | 3.70411   | No change |
| NR_001462 | G6b           | 0 | 1 | -0.371572 | 0.360481  | 0.247555  | No change |
| NR_001463 | Xist          | 0 | 1 | 0.519111  | 0.140024  | 0.192319  | No change |
| NR_001579 | Terc          | 0 | 1 | -0.623111 | 1.57994   | 0.904168  | No change |
| NR_001592 | H19           | 0 | 1 | -1.56422  | 0.399768  | 0.109814  | No change |
| NR_002167 | E530001F21Rik | 0 | 1 | 0.113855  | 0         | 0         | No change |
| NR_002172 | Snord15a      | 0 | 1 | 0.297301  | 27.3121   | 32.0149   | No change |
| NR_002321 | Tug1          | 0 | 1 | 0.100931  | 24.8418   | 25.3613   | No change |
| NR_002445 | BC002163      | 0 | 1 | 0.113855  | 42.0462   | 43.3119   | No change |

|           |               |   |   |             |            |            |           |
|-----------|---------------|---|---|-------------|------------|------------|-----------|
| NR_002452 | Nctc1         | 0 | 1 | 0.113855    | 0          | 0          | No change |
| NR_002455 | Snord34       | 0 | 1 | 0.3065      | 6.33572    | 7.61419    | No change |
| NR_002687 | Gm5424        | 0 | 1 | 0.000701148 | 23.201     | 22.0931    | No change |
| NR_002690 | LOC654426     | 0 | 1 | 0.0468206   | 139.062    | 136.737    | No change |
| NR_002839 | Dlx6as        | 0 | 1 | -2.47111    | 0.257359   | 0          | No change |
| NR_002844 | Tsix          | 0 | 1 | 1.26586     | 0.129481   | 0.316774   | No change |
| NR_002848 | 6430411K18Rik | 0 | 1 | -0.14918    | 0.26459    | 0.218044   | No change |
| NR_002849 | 8430431K14Rik | 0 | 1 | -1.26466    | 0.293033   | 0.100618   | No change |
| NR_002851 | Snord82       | 0 | 1 | -1.47111    | 5.12448    | 1.05575    | No change |
| NR_002853 | Airn          | 0 | 1 | 0.410837    | 2.01493    | 2.56396    | No change |
| NR_002854 | Dlx1as        | 0 | 1 | -0.886145   | 0.0249527  | 0          | No change |
| NR_002855 | Igf2as        | 0 | 1 | 1.11385     | 0          | 0.0150253  | No change |
| NR_002857 | Psg-ps1       | 0 | 1 | 0.113855    | 0          | 0          | No change |
| NR_002858 | Gm4956        | 0 | 1 | 1.11385     | 0.182124   | 0.43775    | No change |
| NR_002859 | Olfr75-ps1    | 0 | 1 | 0.113855    | 0          | 0          | No change |
| NR_002861 | Serpina4-ps1  | 0 | 1 | -0.471108   | 0.10302    | 0.0530606  | No change |
| NR_002865 | Rnu11         | 0 | 1 | 0.94393     | 5.16244    | 9.97097    | No change |
| NR_002867 | Pax6os1       | 0 | 1 | -1.88615    | 0.142813   | 0          | No change |
| NR_002868 | Gm5476        | 0 | 1 | 0.113855    | 0          | 0          | No change |
| NR_002869 | Gm5477        | 0 | 1 | -1.47111    | 0.194402   | 0          | No change |
| NR_002870 | Dnm3os        | 0 | 1 | -0.341149   | 1.06368    | 0.796873   | No change |
| NR_002871 | Vax2os2       | 0 | 1 | -0.886145   | 0.0485665  | 0          | No change |
| NR_002872 | Gm6042        | 0 | 1 | 0.113855    | 0          | 0          | No change |
| NR_002874 | Has2as        | 0 | 1 | 0.113855    | 0          | 0          | No change |
| NR_002878 | Defa-ps12     | 0 | 1 | 1.11385     | 0          | 0.427327   | No change |
| NR_002879 | Defb44-ps     | 0 | 1 | 0.113855    | 0          | 0          | No change |
| NR_002881 | Defa-ps13     | 0 | 1 | 0.113855    | 0          | 0          | No change |
| NR_002895 | Snord116      | 0 | 1 | 0.113855    | 0          | 0          | No change |
| NR_002897 | Snora64       | 0 | 1 | -0.41666    | 7.14799    | 4.90878    | No change |
| NR_002898 | Snora65       | 0 | 1 | 0.113855    | 0.590618   | 0.608398   | No change |
| NR_002900 | Snora69       | 0 | 1 | 0.698817    | 0.571254   | 1.1769     | No change |
| NR_002902 | Snora62       | 0 | 1 | 1.11385     | 0          | 0.560867   | No change |
| NR_002903 | Snord61       | 0 | 1 | 0.113855    | 0          | 0          | No change |
| NR_002928 | Gm1943        | 0 | 1 | -0.177911   | 4.39901    | 3.68989    | No change |
| NR_003100 | 4930515G16Rik | 0 | 1 | -1.88615    | 0.448667   | 0          | No change |
| NR_003145 | Shhg10        | 0 | 1 | 0.418709    | 2.10791    | 2.71421    | No change |
| NR_003146 | Defa-ps1      | 0 | 1 | -1.47111    | 0.494276   | 0          | No change |
| NR_003185 | Spr2j-ps      | 0 | 1 | 0.113855    | 0          | 0          | No change |
| NR_003188 | Kis2          | 0 | 1 | 0.113855    | 0          | 0          | No change |
| NR_003202 | Pinc          | 0 | 1 | 0.113855    | 0          | 0          | No change |
| NR_003243 | Fate1         | 0 | 1 | 1.49237     | 0.668696   | 1.91341    | No change |
| NR_003247 | Ceacam-ps1    | 0 | 1 | 0.113855    | 0          | 0          | No change |
| NR_003282 | Gm11194       | 0 | 1 | 0.476425    | 0.249795   | 0.336489   | No change |
| NR_003283 | Gm11202       | 0 | 1 | -0.886145   | 0.0318669  | 0          | No change |
| NR_003293 | D030028A08Rik | 0 | 1 | 0.177985    | 1.06269    | 1.1456     | No change |
| NR_003364 | BC018473      | 0 | 1 | 0.113855    | 0          | 0          | No change |
| NR_003492 | 2210409E12Rik | 0 | 1 | -3.05607    | 1.4789     | 0          | No change |
| NR_003519 | Pisd-ps2      | 0 | 1 | 0.205195    | 7.13355    | 7.83174    | No change |
| NR_003548 | Spr2g         | 0 | 1 | 0.113855    | 0          | 0          | No change |
| NR_003552 | Cyp2d13       | 0 | 1 | 0.113855    | 0          | 0          | No change |
| NR_003564 | Gm15698       | 0 | 1 | -0.886145   | 0.0860407  | 0          | No change |
| NR_003568 | Gpr137b-ps    | 0 | 1 | 0.278914    | 4.6699     | 5.39653    | No change |
| NR_003619 | 6330549D23Rik | 0 | 1 | -0.225632   | 3.0312     | 2.46242    | No change |
| NR_003620 | E330021D16Rik | 0 | 1 | -0.886145   | 0.00833349 | 0          | No change |
| NR_003622 | Gm5065        | 0 | 1 | 0.113855    | 0.00687239 | 0.00707928 | No change |
| NR_003623 | Gm5069        | 0 | 1 | 0.247121    | 0.583856   | 0.661576   | No change |
| NR_003624 | Gm10319       | 0 | 1 | 0.113855    | 0          | 0          | No change |
| NR_003627 | D030018L15Rik | 0 | 1 | -1.47111    | 0.0560593  | 0.0115494  | No change |
| NR_003630 | Gm6498        | 0 | 1 | -0.793036   | 0.610195   | 0.314282   | No change |
| NR_003631 | Gm6578        | 0 | 1 | 0.64437     | 0.0554053  | 0.0856098  | No change |
| NR_003632 | Gm6787        | 0 | 1 | 0.988324    | 0.239659   | 0.493748   | No change |
| NR_003633 | Meg3          | 0 | 1 | -0.129002   | 0.427115   | 0.370834   | No change |
| NR_003647 | Gm5039        | 0 | 1 | 0.113855    | 0          | 0          | No change |
| NR_003649 | Gm5434        | 0 | 1 | -0.985681   | 1.3929     | 0.6432     | No change |
| NR_003681 | Snora15       | 0 | 1 | 1.52889     | 3.00401    | 9.28332    | No change |
| NR_003960 | Gm5478        | 0 | 1 | 1.69882     | 0          | 0.0485074  | No change |
| NR_003967 | Gm4759        | 0 | 1 | -0.085454   | 0.676412   | 0.603871   | No change |
| NR_004051 | Btnl5         | 0 | 1 | 0.113855    | 0          | 0          | No change |
| NR_004052 | Gm9079        | 0 | 1 | -0.35563    | 0.670124   | 0.487269   | No change |
| NR_004410 | Snord87       | 0 | 1 | 0.698817    | 0.941796   | 1.9403     | No change |
| NR_004417 | Snord73a      | 0 | 1 | -0.886145   | 3.07469    | 1.05575    | No change |
| NR_004418 | Rnu73b        | 0 | 1 | 0.113855    | 6.87113    | 7.07798    | No change |
| NR_004433 | Gm8234        | 0 | 1 | -0.14918    | 0.174232   | 0.143582   | No change |
| NR_004434 | Rprl1         | 0 | 1 | 1.11385     | 0          | 0.0859772  | No change |
| NR_004438 | Apoo-ps       | 0 | 1 | 0.92121     | 1.76886    | 3.27979    | No change |
| NR_004439 | Rprl2         | 0 | 1 | 0.113855    | 0          | 0          | No change |

|           |               |   |   |            |           |           |           |
|-----------|---------------|---|---|------------|-----------|-----------|-----------|
| NR_004443 | Nphs1as       | 0 | 1 | 0.113855   | 0         | 0         | No change |
| NR_004444 | Zfx2as        | 0 | 1 | -0.0787903 | 0.420343  | 0.375264  | No change |
| NR_004447 | Gm5523        | 0 | 1 | 1.11385    | 0.391848  | 0.864951  | No change |
| NR_004853 | Cdk3-ps       | 0 | 1 | -0.301183  | 0.146516  | 0.100618  | No change |
| NR_004857 | LOC100134990  | 0 | 1 | 0.234149   | 1.95817   | 2.20049   | No change |
| NR_006883 | Rhox3-ps      | 0 | 1 | -2.20807   | 0.0703436 | 0         | No change |
| NR_015347 | Gm4850        | 0 | 1 | 0.113855   | 0         | 0         | No change |
| NR_015348 | Hoxa11as      | 0 | 1 | 0.528892   | 0.0757944 | 0.117114  | No change |
| NR_015349 | Etohd2        | 0 | 1 | -0.0648511 | 6.84703   | 6.22875   | No change |
| NR_015351 | lpw           | 0 | 1 | 0.113855   | 0         | 0         | No change |
| NR_015372 | Gm12166       | 0 | 1 | 0.342124   | 12.4061   | 15.0348   | No change |
| NR_015373 | Gm5485        | 0 | 1 | -0.886145  | 0.110976  | 0         | No change |
| NR_015385 | Six3os1       | 0 | 1 | 0.113855   | 0         | 0         | No change |
| NR_015464 | A330069E16Rik | 0 | 1 | -0.208073  | 0.312524  | 0.241449  | No change |
| NR_015465 | C920009B18Rik | 0 | 1 | 0.85082    | 0.0308717 | 0.0636022 | No change |
| NR_015466 | 7530420F21Rik | 0 | 1 | 0.113855   | 0.190418  | 0.19615   | No change |
| NR_015468 | 2900079G21Rik | 0 | 1 | 0.113855   | 0         | 0         | No change |
| NR_015469 | 2810442I21Rik | 0 | 1 | 1.11385    | 0.0444329 | 0.114426  | No change |
| NR_015470 | 2610203C22Rik | 0 | 1 | 0.805733   | 1.39946   | 2.3642    | No change |
| NR_015471 | 3830408C21Rik | 0 | 1 | 0.3065     | 0.477349  | 0.567368  | No change |
| NR_015477 | 2310050B05Rik | 0 | 1 | -0.886145  | 2.41076   | 1.12879   | No change |
| NR_015478 | 5730422E09Rik | 0 | 1 | -0.322244  | 0.881175  | 0.660147  | No change |
| NR_015481 | D430019H16Rik | 0 | 1 | -0.6935    | 0.413199  | 0.212819  | No change |
| NR_015482 | LOC100043315  | 0 | 1 | -1.88615   | 0.207832  | 0         | No change |
| NR_015487 | A930005H10Rik | 0 | 1 | 0.232499   | 3.7792    | 4.23647   | No change |
| NR_015488 | A930003A15Rik | 0 | 1 | 0.113855   | 0         | 0         | No change |
| NR_015489 | 2900041M22Rik | 0 | 1 | 1.11385    | 0.0518549 | 0.160248  | No change |
| NR_015492 | C230035I16Rik | 0 | 1 | 0.403361   | 0.903636  | 1.16355   | No change |
| NR_015495 | A230056P14Rik | 0 | 1 | -0.258114  | 2.13295   | 1.68619   | No change |
| NR_015498 | 1500004A13Rik | 0 | 1 | -0.228251  | 6.8944    | 5.59847   | No change |
| NR_015500 | A530013C23Rik | 0 | 1 | 1.57329    | 0.0977004 | 0.335472  | No change |
| NR_015501 | 4833422C13Rik | 0 | 1 | 0.196317   | 0.813249  | 0.888502  | No change |
| NR_015503 | A330040F15Rik | 0 | 1 | 0.461778   | 0.630135  | 0.843836  | No change |
| NR_015504 | 2410018L13Rik | 0 | 1 | -0.734142  | 0.396264  | 0.204097  | No change |
| NR_015506 | 4833418N02Rik | 0 | 1 | -0.574201  | 2.5964    | 1.64228   | No change |
| NR_015507 | C130036L24Rik | 0 | 1 | 0.85082    | 0.770696  | 1.36097   | No change |
| NR_015510 | 4632427E13Rik | 0 | 1 | 0.416039   | 10.6258   | 13.5212   | No change |
| NR_015511 | E030011O05Rik | 0 | 1 | -0.0877791 | 2.00949   | 1.78772   | No change |
| NR_015513 | E130114P18Rik | 0 | 1 | 0.113855   | 0         | 0         | No change |
| NR_015514 | 9330175E14Rik | 0 | 1 | 1.11385    | 0.090628  | 0.233391  | No change |
| NR_015515 | 6430562O15Rik | 0 | 1 | 0.751285   | 1.05289   | 1.7103    | No change |
| NR_015517 | 5930412G12Rik | 0 | 1 | 1.22933    | 0.144892  | 0.358209  | No change |
| NR_015519 | Al662270      | 0 | 1 | 0.92121    | 0.544476  | 1.01976   | No change |
| NR_015522 | 2810429I04Rik | 0 | 1 | -0.471108  | 0.238266  | 0.12272   | No change |
| NR_015525 | 9430060I03Rik | 0 | 1 | 0.435783   | 1.95907   | 2.53329   | No change |
| NR_015526 | A830082N09Rik | 0 | 1 | 0.389489   | 0.887808  | 1.11776   | No change |
| NR_015530 | 9530026P05Rik | 0 | 1 | 0.427963   | 2.52155   | 3.24683   | No change |
| NR_015537 | 9230114K14Rik | 0 | 1 | -0.454429  | 1.38201   | 0.949078  | No change |
| NR_015538 | Gm2518        | 0 | 1 | -0.0985535 | 4.69682   | 4.17187   | No change |
| NR_015539 | 9630013A20Rik | 0 | 1 | -0.208073  | 0.135589  | 0.104753  | No change |
| NR_015542 | E430016F16Rik | 0 | 1 | -0.886145  | 0.0225471 | 0         | No change |
| NR_015543 | 2810055G20Rik | 0 | 1 | 0.136339   | 4.20237   | 4.39723   | No change |
| NR_015544 | 9630028H03Rik | 0 | 1 | 2.69882    | 0         | 0.156886  | No change |
| NR_015545 | 4930481A15Rik | 0 | 1 | 0.393963   | 4.13657   | 5.18149   | No change |
| NR_015546 | C130026L21Rik | 0 | 1 | 0.113855   | 0         | 0         | No change |
| NR_015548 | 5830432E09Rik | 0 | 1 | 0.0398542  | 1.81929   | 1.77796   | No change |
| NR_015551 | 1700012B15Rik | 0 | 1 | -0.201019  | 6.5601    | 5.41945   | No change |
| NR_015552 | 5330434G04Rik | 0 | 1 | 0.113855   | 0         | 0         | No change |
| NR_015553 | 9430076C15Rik | 0 | 1 | 0.85082    | 0.115043  | 0.213311  | No change |
| NR_015554 | Al506816      | 0 | 1 | 0.698817   | 0.0286684 | 0.0590629 | No change |
| NR_015556 | 2610035D17Rik | 0 | 1 | 0.310892   | 3.05472   | 3.61286   | No change |
| NR_015557 | F730016J06Rik | 0 | 1 | -0.886145  | 0.0265396 | 0         | No change |
| NR_015558 | 5031425F14Rik | 0 | 1 | 0.528892   | 0.0851992 | 0.131646  | No change |
| NR_015561 | C130071C03Rik | 0 | 1 | 1.11385    | 0         | 0.0524788 | No change |
| NR_015562 | 9530036O11Rik | 0 | 1 | 1.17275    | 0.262004  | 0.588853  | No change |
| NR_015565 | A530053G22Rik | 0 | 1 | 1.11385    | 0         | 0.0495794 | No change |
| NR_015567 | A930007I19Rik | 0 | 1 | -0.886145  | 0.631658  | 0.309845  | No change |
| NR_015577 | 2210015D19Rik | 0 | 1 | 0.129622   | 3.40889   | 3.55053   | No change |
| NR_015582 | C330024D21Rik | 0 | 1 | -3.05607   | 0.201789  | 0         | No change |
| NR_015583 | BC024386      | 0 | 1 | -0.886145  | 0.0431803 | 0         | No change |
| NR_015586 | A330035P11Rik | 0 | 1 | 0.137702   | 3.05919   | 3.20424   | No change |
| NR_015587 | 9330111N05Rik | 0 | 1 | -2.05607   | 0.396264  | 0.0510241 | No change |
| NR_015588 | 4932441J04Rik | 0 | 1 | -0.471108  | 0.191992  | 0.0988856 | No change |
| NR_015589 | 9330158H04Rik | 0 | 1 | 0.113855   | 0.0224599 | 0.023136  | No change |
| NR_015591 | 5430405H02Rik | 0 | 1 | -0.354532  | 4.61848   | 3.42541   | No change |
| NR_015593 | D130009I18Rik | 0 | 1 | -1.88615   | 0.0786011 | 0         | No change |

|           |                |   |   |            |           |           |           |
|-----------|----------------|---|---|------------|-----------|-----------|-----------|
| NR_015595 | 2410137F16Rik  | 0 | 1 | -0.886145  | 0.0207543 | 0         | No change |
| NR_015596 | 4930442L01Rik  | 0 | 1 | -0.0708617 | 22.8685   | 20.7217   | No change |
| NR_015598 | 2810047C21Rik1 | 0 | 1 | 0.576198   | 1.86526   | 2.66378   | No change |
| NR_015599 | A330076H08Rik  | 0 | 1 | 0.698817   | 0.341632  | 0.547426  | No change |
| NR_015600 | A230072E10Rik  | 0 | 1 | 0.578523   | 1.03798   | 1.48383   | No change |
| NR_015602 | F730043M19Rik  | 0 | 1 | -1.05607   | 0.359474  | 0.138861  | No change |
| NR_015604 | E130112N10Rik  | 0 | 1 | -0.767501  | 1.75393   | 0.956504  | No change |
| NR_015605 | 2900052N01Rik  | 0 | 1 | -2.20807   | 0.242645  | 0.0277721 | No change |
| NR_015609 | C86187         | 0 | 1 | 0.113855   | 0.0690029 | 0.0710802 | No change |
| NR_015610 | 9530059O14Rik  | 0 | 1 | 0.198744   | 0.560627  | 0.613598  | No change |
| NR_015611 | 2700086A05Rik  | 0 | 1 | -0.471108  | 0.918111  | 0.60184   | No change |
| NR_015615 | 4732416N19Rik  | 0 | 1 | 0.0336845  | 4.55344   | 4.42993   | No change |
| NR_015618 | A930015D03Rik  | 0 | 1 | 0.579518   | 1.7445    | 2.51583   | No change |
| NR_023846 | Apeg3          | 0 | 1 | 0.059407   | 2.09482   | 2.07488   | No change |
| NR_024067 | Shhg6          | 0 | 1 | 0.464352   | 13.5276   | 17.8155   | No change |
| NR_024078 | Btbd19         | 0 | 1 | 0.599282   | 0.91879   | 1.33616   | No change |
| NR_024085 | BC006965       | 0 | 1 | -0.471108  | 0.0714067 | 0.0367782 | No change |
| NR_024198 | Rprl3          | 0 | 1 | 0.113855   | 0         | 0         | No change |
| NR_024201 | Rnu7           | 0 | 1 | -0.14918   | 2.45786   | 2.10593   | No change |
| NR_024257 | 4930412O13Rik  | 0 | 1 | -0.083182  | 5.65964   | 5.08349   | No change |
| NR_024325 | 9130024F11Rik  | 0 | 1 | 1.11385    | 0.0373889 | 0.0962862 | No change |
| NR_024328 | 9230116N13Rik  | 0 | 1 | 0.32798    | 0.79763   | 0.958582  | No change |
| NR_024509 | Tmem80         | 0 | 1 | -0.0270077 | 4.18756   | 3.9028    | No change |
| NR_024513 | Gm5            | 0 | 1 | -1.47111   | 0.297198  | 0         | No change |
| NR_024599 | Gm11346        | 0 | 1 | -1.20807   | 0.25002   | 0.0643865 | No change |
| NR_026561 | Gm8884         | 0 | 1 | 0.113855   | 0.181492  | 0.186956  | No change |
| NR_026688 | 2010001M06Rik  | 0 | 1 | 0.366242   | 9.33885   | 11.4866   | No change |
| NR_026733 | 3110039M20Rik  | 0 | 1 | 0.113855   | 0         | 0         | No change |
| NR_026741 | LOC100270707   | 0 | 1 | 1.59928    | 0.148441  | 0.496956  | No change |
| NR_026831 | Krtap12-4      | 0 | 1 | 0.113855   | 0         | 0         | No change |
| NR_026843 | BC024582       | 0 | 1 | -0.564217  | 0.293709  | 0.172886  | No change |
| NR_026848 | C030034I22Rik  | 0 | 1 | 0.258245   | 0.939053  | 1.0719    | No change |
| NR_026853 | A930012L18Rik  | 0 | 1 | 1.03985    | 0.265328  | 0.546632  | No change |
| NR_026942 | E330013P04Rik  | 0 | 1 | 0.205485   | 2.02009   | 2.21962   | No change |
| NR_026944 | Gm10941        | 0 | 1 | -1.6935    | 1.96042   | 0.504859  | No change |
| NR_027137 | Gm10565        | 0 | 1 | 0.628428   | 0.792866  | 1.18427   | No change |
| NR_027236 | Al854703       | 0 | 1 | -0.0381483 | 0.175549  | 0.160741  | No change |
| NR_027298 | A230020J21Rik  | 0 | 1 | -0.886145  | 1.56376   | 0.783649  | No change |
| NR_027316 | Pdxk-ps        | 0 | 1 | 0.177985   | 0.624915  | 0.674381  | No change |
| NR_027362 | A930003O13Rik  | 0 | 1 | -0.973608  | 0.571546  | 0.257579  | No change |
| NR_027376 | Gm5468         | 0 | 1 | -0.623111  | 0.0967286 | 0.0498202 | No change |
| NR_027377 | LOC100045653   | 0 | 1 | -0.741755  | 1.00571   | 0.559992  | No change |
| NR_027448 | AA543186       | 0 | 1 | 0.0799075  | 1.72589   | 1.73551   | No change |
| NR_027452 | LOC100272221   | 0 | 1 | -0.0560702 | 0.84326   | 0.766452  | No change |
| NR_027478 | Gm8580         | 0 | 1 | 1.11385    | 0         | 0.117497  | No change |
| NR_027619 | Mug-ps1        | 0 | 1 | 0.113855   | 0         | 0         | No change |
| NR_027637 | Gm4489         | 0 | 1 | -0.886145  | 0.134025  | 0         | No change |
| NR_027658 | Gm8883         | 0 | 1 | 1.11385    | 0         | 0.0704524 | No change |
| NR_027707 | Gm5166         | 0 | 1 | -3.05607   | 0.626453  | 0         | No change |
| NR_027797 | Gm11961        | 0 | 1 | 0.113855   | 0         | 0         | No change |
| NR_027799 | Tbrg3          | 0 | 1 | -0.237     | 3.51129   | 2.83421   | No change |
| NR_027800 | Gm16516        | 0 | 1 | -0.108538  | 1.48517   | 1.30323   | No change |
| NR_027802 | Mtag2          | 0 | 1 | 1.11385    | 0.486683  | 1.10293   | No change |
| NR_027805 | A430093F15Rik  | 0 | 1 | -0.886145  | 0.0988552 | 0.0339437 | No change |
| NR_027806 | Pea15b         | 0 | 1 | 0.113855   | 0         | 0         | No change |
| NR_027808 | Zfp862         | 0 | 1 | -0.0560702 | 1.11709   | 1.02156   | No change |
| NR_027813 | Zp4-ps         | 0 | 1 | 0.113855   | 0         | 0         | No change |
| NR_027819 | 1810032O08Rik  | 0 | 1 | -0.0737722 | 3.22279   | 2.90484   | No change |
| NR_027824 | Gm13749        | 0 | 1 | 0.113855   | 0         | 0         | No change |
| NR_027831 | 2810002D19Rik  | 0 | 1 | -0.132306  | 2.35131   | 2.03456   | No change |
| NR_027846 | D630029K05Rik  | 0 | 1 | 0.435783   | 0.228501  | 0.302632  | No change |
| NR_027858 | Nlrp1c-ps      | 0 | 1 | -0.248715  | 0.705598  | 0.560705  | No change |
| NR_027860 | Gm9199         | 0 | 1 | 0.113855   | 0.0541094 | 0.0557383 | No change |
| NR_027864 | Tardbp         | 0 | 1 | 0.104779   | 21.1589   | 21.6591   | No change |
| NR_027865 | 1700054K19Rik  | 0 | 1 | -1.88615   | 0.463589  | 0         | No change |
| NR_027871 | Cts8-ps        | 0 | 1 | 0.113855   | 0.016511  | 0.017008  | No change |
| NR_027874 | 0610040B10Rik  | 0 | 1 | -0.596639  | 5.54376   | 3.42639   | No change |
| NR_027881 | 6530411M01Rik  | 0 | 1 | -3.20807   | 0.51455   | 0         | No change |
| NR_027887 | 9430008C03Rik  | 0 | 1 | 0.378618   | 3.2713    | 4.0535    | No change |
| NR_027890 | 5031426D15Rik  | 0 | 1 | -0.115171  | 1.2501    | 1.09696   | No change |
| NR_027893 | BB123696       | 0 | 1 | 0.757711   | 0.452944  | 0.746527  | No change |
| NR_027897 | 0610012G03Rik  | 0 | 1 | 0.0336845  | 12.2235   | 11.9082   | No change |
| NR_027900 | Shhg9          | 0 | 1 | 0.554427   | 4.95086   | 7.06141   | No change |
| NR_027903 | 1700086O06Rik  | 0 | 1 | 0.64437    | 1.92067   | 2.88294   | No change |
| NR_027907 | Al414108       | 0 | 1 | -0.614066  | 0.745839  | 0.45802   | No change |
| NR_027919 | Bambi-ps1      | 0 | 1 | -0.471108  | 0.114721  | 0.0590872 | No change |

|           |               |   |   |             |           |           |           |
|-----------|---------------|---|---|-------------|-----------|-----------|-----------|
| NR_027920 | Msx1as        | 0 | 1 | 0.461778    | 0.318523  | 0.426546  | No change |
| NR_027955 | 4931440P22Rik | 0 | 1 | 0.549954    | 0.599832  | 0.849597  | No change |
| NR_027963 | Zfp783        | 0 | 1 | 0.0607435   | 2.60461   | 2.58545   | No change |
| NR_027964 | Gm10416       | 0 | 1 | 0.492366    | 0.977004  | 1.34189   | No change |
| NR_027965 | 2310061J03Rik | 0 | 1 | 0.268577    | 2.68447   | 3.08435   | No change |
| NR_027970 | 0610008F07Rik | 0 | 1 | 0.113855    | 0         | 0         | No change |
| NR_027971 | 2610204G22Rik | 0 | 1 | 0.258245    | 1.29194   | 1.4787    | No change |
| NR_027973 | 5730522E02Rik | 0 | 1 | -1.47111    | 0.0917012 | 0         | No change |
| NR_027974 | 3110070M22Rik | 0 | 1 | -1.37157    | 1.66818   | 0.5728    | No change |
| NR_027975 | Gm5607        | 0 | 1 | 0.113855    | 0         | 0         | No change |
| NR_027987 | C030016D13Rik | 0 | 1 | 0.805733    | 0.322279  | 0.553302  | No change |
| NR_027989 | Gm9871        | 0 | 1 | 1.11385     | 0         | 0.0460199 | No change |
| NR_027993 | Gm3414        | 0 | 1 | 0.000774761 | 3.96383   | 3.77465   | No change |
| NR_028021 | Ppifos        | 0 | 1 | 0.113855    | 1.37268   | 1.414     | No change |
| NR_028023 | Gm4566        | 0 | 1 | -0.6935     | 0.786011  | 0.404836  | No change |
| NR_028030 | Gm9767        | 0 | 1 | 0.113855    | 0         | 0         | No change |
| NR_028061 | Gm8615        | 0 | 1 | -0.195629   | 6.78367   | 5.63203   | No change |
| NR_028079 | Snora3        | 0 | 1 | -0.523575   | 7.55007   | 4.78606   | No change |
| NR_028086 | Ncrna00086    | 0 | 1 | -0.128506   | 4.38993   | 3.81917   | No change |
| NR_028091 | Snord72       | 0 | 1 | 2.11385     | 0         | 3.58955   | No change |
| NR_028113 | 0610039K10Rik | 0 | 1 | -0.6935     | 0.439703  | 0.22647   | No change |
| NR_028122 | 2310001K24Rik | 0 | 1 | -1.47111    | 0.303673  | 0         | No change |
| NR_028123 | 1600029I14Rik | 0 | 1 | 0.476425    | 0.483979  | 0.664731  | No change |
| NR_028124 | 2310068J16Rik | 0 | 1 | 0.751285    | 1.0569    | 1.72913   | No change |
| NR_028125 | 0610038B21Rik | 0 | 1 | 0.599282    | 0.183041  | 0.282827  | No change |
| NR_028126 | 6330407A03Rik | 0 | 1 | 0.354863    | 0.378149  | 0.46744   | No change |
| NR_028128 | Snord68       | 0 | 1 | 1.11385     | 0         | 1.49565   | No change |
| NR_028129 | LOC100302567  | 0 | 1 | 1.69882     | 0         | 1.52747   | No change |
| NR_028261 | Rian          | 0 | 1 | 0.354863    | 1.05153   | 1.28377   | No change |
| NR_028263 | B130006D01Rik | 0 | 1 | 0.497998    | 1.26794   | 1.71145   | No change |
| NR_028264 | Dleu2         | 0 | 1 | -0.457302   | 2.09819   | 1.4409    | No change |
| NR_028266 | BC037032      | 0 | 1 | 0.579518    | 0.618219  | 0.88535   | No change |
| NR_028267 | Fcho1         | 0 | 1 | 0.791927    | 0.492095  | 0.823727  | No change |
| NR_028271 | Phxr4         | 0 | 1 | 0.651512    | 1.51506   | 2.28899   | No change |
| NR_028278 | Gm8801        | 0 | 1 | -0.464505   | 4.03151   | 2.76859   | No change |
| NR_028281 | Snord43       | 0 | 1 | -1.20807    | 5.80774   | 1.49565   | No change |
| NR_028282 | Snord83b      | 0 | 1 | -0.564217   | 6.33572   | 3.7294    | No change |
| NR_028283 | LOC100302626  | 0 | 1 | -3.05607    | 0.36753   | 0         | No change |
| NR_028284 | Mcpt-ps1      | 0 | 1 | 0.113855    | 0         | 0         | No change |
| NR_028285 | 2210417A02Rik | 0 | 1 | -0.886145   | 0.126714  | 0         | No change |
| NR_028298 | 2610306M01Rik | 0 | 1 | -0.192807   | 6.26832   | 5.20728   | No change |
| NR_028299 | 1700084E18Rik | 0 | 1 | -0.760614   | 3.37224   | 1.81959   | No change |
| NR_028305 | Tmem181c-ps   | 0 | 1 | -0.00478969 | 1.69983   | 1.60903   | No change |
| NR_028306 | Tmem181d-ps   | 0 | 1 | -0.00478969 | 1.69983   | 1.60903   | No change |
| NR_028307 | Gm6524        | 0 | 1 | 0.239386    | 0.454618  | 0.515134  | No change |
| NR_028310 | 4930503E24Rik | 0 | 1 | -0.886145   | 0.0522828 | 0         | No change |
| NR_028311 | Gm4371        | 0 | 1 | -0.6935     | 0.259725  | 0.133772  | No change |
| NR_028317 | 8430429K09Rik | 0 | 1 | -0.945039   | 1.66763   | 0.787339  | No change |
| NR_028329 | D630032N06Rik | 0 | 1 | 0.902351    | 1.08895   | 2.01912   | No change |
| NR_028331 | Zfp672        | 0 | 1 | 0.315062    | 22.2651   | 26.3914   | No change |
| NR_028362 | Snord7        | 0 | 1 | 1.69882     | 0         | 1.49565   | No change |
| NR_028363 | AA465934      | 0 | 1 | 0.85082     | 0.358318  | 0.738211  | No change |
| NR_028364 | Al450353      | 0 | 1 | 1.31549     | 0.418158  | 1.05293   | No change |
| NR_028368 | 4930404I05Rik | 0 | 1 | -0.590689   | 3.06421   | 1.90855   | No change |
| NR_028376 | A930004D18Rik | 0 | 1 | 0.64437     | 0.172882  | 0.267129  | No change |
| NR_028378 | LOC100034739  | 0 | 1 | 1.11385     | 0.0418702 | 0.107827  | No change |
| NR_028382 | B230319C09Rik | 0 | 1 | 0.16935     | 2.06314   | 2.21026   | No change |
| NR_028416 | D630041G03Rik | 0 | 1 | 0.605708    | 0.593539  | 0.867803  | No change |
| NR_028417 | Gm7854        | 0 | 1 | 0.476425    | 0.973365  | 1.30347   | No change |
| NR_028421 | D430020J02Rik | 0 | 1 | -0.0381483  | 1.18083   | 1.09226   | No change |
| NR_028422 | C130080G10Rik | 0 | 1 | 0.113855    | 0         | 0         | No change |
| NR_028423 | A530058N18Rik | 0 | 1 | 0.113855    | 0         | 0         | No change |
| NR_028424 | Gm2176        | 0 | 1 | -1.47111    | 0.080384  | 0         | No change |
| NR_028425 | LOC100303645  | 0 | 1 | -2.05607    | 0.249795  | 0.0321644 | No change |
| NR_028427 | 5830416P10Rik | 0 | 1 | 0.765932    | 0.0790169 | 0.135659  | No change |
| NR_028429 | Thap6         | 0 | 1 | 0.138946    | 2.14411   | 2.24774   | No change |
| NR_028430 | BC052688      | 0 | 1 | -1.30118    | 0.300771  | 0.0885215 | No change |
| NR_028433 | AF357355      | 0 | 1 | 0.113855    | 0         | 0         | No change |
| NR_028434 | AF357359      | 0 | 1 | 0.113855    | 0         | 0         | No change |
| NR_028441 | Vmn2r-ps60    | 0 | 1 | 0.113855    | 0         | 0         | No change |
| NR_028442 | 9330020H09Rik | 0 | 1 | -0.067752   | 1.87041   | 1.69634   | No change |
| NR_028446 | Snora35       | 0 | 1 | 0.113855    | 0         | 0         | No change |
| NR_028478 | Snora75       | 0 | 1 | 0.113855    | 1.8024    | 1.85666   | No change |
| NR_028479 | Snora20       | 0 | 1 | 0.113855    | 4.57003   | 4.7076    | No change |
| NR_028480 | Gm12238       | 0 | 1 | -0.208073   | 2.24816   | 1.73688   | No change |
| NR_028481 | Snora31       | 0 | 1 | 1.11385     | 1.86678   | 4.48694   | No change |



|           |               |   |   |            |           |           |           |
|-----------|---------------|---|---|------------|-----------|-----------|-----------|
| NR_028497 | Gm13315       | 0 | 1 | 0.476425   | 0.457349  | 0.616076  | No change |
| NR_028521 | Snord11       | 0 | 1 | 0.0289659  | 37.6121   | 36.4653   | No change |
| NR_028523 | Snord19       | 0 | 1 | 0.528892   | 6.45305   | 9.30624   | No change |
| NR_028524 | Snord38a      | 0 | 1 | 1.69882    | 0         | 2.43359   | No change |
| NR_028525 | Snord45c      | 0 | 1 | 0.528892   | 2.28501   | 3.5307    | No change |
| NR_028527 | Snord52       | 0 | 1 | 2.11385    | 0         | 3.65039   | No change |
| NR_028528 | Snord57       | 0 | 1 | -0.886145  | 1.10624   | 0         | No change |
| NR_028529 | Snord64       | 0 | 1 | 1.11385    | 0         | 1.56067   | No change |
| NR_028530 | Snord66       | 0 | 1 | 0.224886   | 58.8785   | 65.6021   | No change |
| NR_028531 | Snord69       | 0 | 1 | 0.113855   | 3.54371   | 3.65039   | No change |
| NR_028532 | Snord71       | 0 | 1 | 0.113855   | 2.1779    | 2.24347   | No change |
| NR_028533 | Snord88a      | 0 | 1 | -0.471108  | 1.93591   | 0.997097  | No change |
| NR_028534 | Snord88c      | 0 | 1 | 1.11385    | 0.829678  | 2.56396   | No change |
| NR_028535 | Snord90       | 0 | 1 | 1.11385    | 0         | 1.05575   | No change |
| NR_028536 | Snord93       | 0 | 1 | -0.886145  | 1.54873   | 0         | No change |
| NR_028537 | Snord99       | 0 | 1 | 1.52889    | 2.48903   | 8.97387   | No change |
| NR_028539 | Snord23       | 0 | 1 | 0.113855   | 0.703969  | 0.725161  | No change |
| NR_028540 | Snord12       | 0 | 1 | 1.36178    | 7.39168   | 19.5794   | No change |
| NR_028542 | Snord8        | 0 | 1 | 1.11385    | 1.40794   | 3.62581   | No change |
| NR_028544 | Scarna3b      | 0 | 1 | 0.92121    | 1.68612   | 3.47376   | No change |
| NR_028545 | Scarna8       | 0 | 1 | 0.113855   | 0.590618  | 0.608398  | No change |
| NR_028547 | Snord110      | 0 | 1 | -0.886145  | 1.18124   | 0         | No change |
| NR_028548 | Snord16a      | 0 | 1 | 0.113855   | 4.59514   | 4.73347   | No change |
| NR_028551 | Snord53       | 0 | 1 | 0.113855   | 5.12448   | 5.27875   | No change |
| NR_028552 | Snord58b      | 0 | 1 | 0.113855   | 0         | 0         | No change |
| NR_028553 | Snord67       | 0 | 1 | 2.43578    | 0         | 2.93024   | No change |
| NR_028554 | Snord70       | 0 | 1 | 1.11385    | 2.62992   | 6.77273   | No change |
| NR_028556 | Snord92       | 0 | 1 | 1.11385    | 0         | 1.01114   | No change |
| NR_028558 | Snora41       | 0 | 1 | 0.113855   | 0         | 0         | No change |
| NR_028559 | Snord111      | 0 | 1 | 0.113855   | 2.1779    | 2.24347   | No change |
| NR_028561 | Snord45b      | 0 | 1 | -0.886145  | 4.6462    | 1.59535   | No change |
| NR_028562 | Snord91a      | 0 | 1 | -0.886145  | 5.80774   | 2.39303   | No change |
| NR_028563 | Snord96a      | 0 | 1 | 0.765932   | 5.43062   | 9.3235    | No change |
| NR_028564 | Snord95       | 0 | 1 | 1.52889    | 2.04979   | 7.39025   | No change |
| NR_028565 | Snord85       | 0 | 1 | -0.301183  | 3.2166    | 2.20895   | No change |
| NR_028567 | Snord1b       | 0 | 1 | -0.886145  | 0.905103  | 0         | No change |
| NR_028568 | Scarna9       | 0 | 1 | -0.326718  | 29.8684   | 22.221    | No change |
| NR_028569 | Snord1c       | 0 | 1 | -0.886145  | 0.893499  | 0         | No change |
| NR_028570 | Snord1a       | 0 | 1 | 0.113855   | 0.917012  | 0.944618  | No change |
| NR_028571 | Snora17       | 0 | 1 | 0.229332   | 5.80774   | 6.52645   | No change |
| NR_028572 | Snora43       | 0 | 1 | -0.538222  | 5.01388   | 3.09889   | No change |
| NR_028573 | Snora24       | 0 | 1 | 0.791927   | 2.1444    | 3.86567   | No change |
| NR_028577 | D030025P21Rik | 0 | 1 | 0.872847   | 0.211511  | 0.381287  | No change |
| NR_028578 | Gm10584       | 0 | 1 | 0.113855   | 0.0795581 | 0.0819532 | No change |
| NR_028579 | Gm10649       | 0 | 1 | -1.47111   | 0.090687  | 0         | No change |
| NR_028580 | Gm10825       | 0 | 1 | 0.765932   | 0.0919432 | 0.157852  | No change |
| NR_028589 | Gm14005       | 0 | 1 | 0.85082    | 0.0498341 | 0.102669  | No change |
| NR_029381 | 5330413P13Rik | 0 | 1 | -1.47111   | 0.0959693 | 0.0197717 | No change |
| NR_029382 | Mir17hg       | 0 | 1 | -0.243467  | 5.81023   | 4.66534   | No change |
| NR_029384 | Otx2os1       | 0 | 1 | 0.113855   | 0         | 0         | No change |
| NR_029412 | Snora16a      | 0 | 1 | 0.988324   | 2.56224   | 5.27875   | No change |
| NR_029430 | Stmn1-rs1     | 0 | 1 | 0.622868   | 1.7797    | 2.63991   | No change |
| NR_029441 | 2810454H06Rik | 0 | 1 | 0.176139   | 1.65289   | 1.77889   | No change |
| NR_029444 | 4930579K19Rik | 0 | 1 | 0.538353   | 2.2384    | 3.11593   | No change |
| NR_029446 | 6230400D17Rik | 0 | 1 | -0.0560702 | 1.08895   | 0.989765  | No change |
| NR_029450 | C530005A16Rik | 0 | 1 | -0.0762481 | 2.28877   | 2.06296   | No change |
| NR_029457 | G530011O06Rik | 0 | 1 | 0.0806879  | 1.25916   | 1.2669    | No change |
| NR_029460 | 6530402F18Rik | 0 | 1 | 0.206964   | 0.22733   | 0.2509    | No change |
| NR_029463 | 9430083A17Rik | 0 | 1 | 0.454084   | 2.16771   | 2.83322   | No change |
| NR_029469 | D4Ert617e     | 0 | 1 | 0.232499   | 2.94355   | 3.29971   | No change |
| NR_029470 | Gm10863       | 0 | 1 | -1.88615   | 0.307469  | 0         | No change |
| NR_029473 | 4930524L23Rik | 0 | 1 | -0.663753  | 0.221824  | 0.124637  | No change |
| NR_029474 | B430319G15Rik | 0 | 1 | 0.21339    | 0.222661  | 0.247008  | No change |
| NR_029526 | Mirlet7g      | 0 | 1 | -1.47111   | 1.58393   | 0         | No change |
| NR_029527 | Mirlet7i      | 0 | 1 | 0.113855   | 0         | 0         | No change |
| NR_029528 | Mir1-1        | 0 | 1 | 0.113855   | 0         | 0         | No change |
| NR_029529 | Mir15b        | 0 | 1 | -0.886145  | 1.08895   | 0         | No change |
| NR_029530 | Mir23b        | 0 | 1 | -0.886145  | 0.941796  | 0         | No change |
| NR_029531 | Mir27b        | 0 | 1 | 2.11385    | 0         | 2.95031   | No change |
| NR_029532 | Mir29b-1      | 0 | 1 | -1.20807   | 3.92636   | 1.01114   | No change |
| NR_029533 | Mir30a        | 0 | 1 | 0.113855   | 3.92636   | 4.04456   | No change |
| NR_029534 | Mir30b        | 0 | 1 | 1.92121    | 2.1779    | 9.72169   | No change |
| NR_029535 | Mir99a        | 0 | 1 | 0.85082    | 2.1444    | 4.41791   | No change |
| NR_029536 | Mir99b        | 0 | 1 | 0.113855   | 0         | 0         | No change |
| NR_029537 | Mir101a       | 0 | 1 | 0.698817   | 0.839674  | 1.7299    | No change |
| NR_029538 | Mir124a-3     | 0 | 1 | 0.113855   | 0         | 0         | No change |

|           |           |   |   |           |          |          |           |
|-----------|-----------|---|---|-----------|----------|----------|-----------|
| NR_029539 | Mir125a   | 0 | 1 | 0.376889  | 4.09958  | 5.27875  | No change |
| NR_029540 | Mir125b-2 | 0 | 1 | -0.886145 | 0.981591 | 0        | No change |
| NR_029541 | Mir126    | 0 | 1 | -0.886145 | 0.954698 | 0        | No change |
| NR_029542 | Mir127    | 0 | 1 | 0.113855  | 0        | 0        | No change |
| NR_029543 | Mir128-1  | 0 | 1 | 0.113855  | 0.995613 | 1.02559  | No change |
| NR_029544 | Mir130a   | 0 | 1 | 0.113855  | 0        | 0        | No change |
| NR_029545 | Mir9-2    | 0 | 1 | 0.113855  | 0        | 0        | No change |
| NR_029546 | Mir132    | 0 | 1 | 0.113855  | 0        | 0        | No change |
| NR_029547 | Mir133a-1 | 0 | 1 | -0.886145 | 1.0249   | 0        | No change |
| NR_029548 | Mir134    | 0 | 1 | 0.113855  | 0        | 0        | No change |
| NR_029550 | Mir136    | 0 | 1 | 0.113855  | 0        | 0        | No change |
| NR_029551 | Mir137    | 0 | 1 | 0.113855  | 0        | 0        | No change |
| NR_029552 | Mir138-2  | 0 | 1 | 0.113855  | 0        | 0        | No change |
| NR_029553 | Mir140    | 0 | 1 | 1.69882   | 0        | 2.05117  | No change |
| NR_029554 | Mir141    | 0 | 1 | -0.208073 | 8.71162  | 6.97968  | No change |
| NR_029555 | Mir142    | 0 | 1 | 0.113855  | 0        | 0        | No change |
| NR_029556 | Mir144    | 0 | 1 | 0.113855  | 0        | 0        | No change |
| NR_029557 | Mir145    | 0 | 1 | 1.11385   | 3.98245  | 9.23027  | No change |
| NR_029558 | Mir146    | 0 | 1 | 0.113855  | 0        | 0        | No change |
| NR_029559 | Mir149    | 0 | 1 | 0.113855  | 0        | 0        | No change |
| NR_029560 | Mir150    | 0 | 1 | 0.113855  | 1.0722   | 1.10448  | No change |
| NR_029562 | Mir152    | 0 | 1 | 0.113855  | 0        | 0        | No change |
| NR_029563 | Mir153    | 0 | 1 | 0.113855  | 0        | 0        | No change |
| NR_029564 | Mir154    | 0 | 1 | 0.113855  | 0        | 0        | No change |
| NR_029565 | Mir155    | 0 | 1 | 1.11385   | 0        | 1.10448  | No change |
| NR_029566 | Mir10b    | 0 | 1 | 0.599282  | 14.3485  | 21.115   | No change |
| NR_029567 | Mir129-1  | 0 | 1 | 0.113855  | 0        | 0        | No change |
| NR_029568 | Mir181a-2 | 0 | 1 | -1.88615  | 2.75104  | 0        | No change |
| NR_029569 | Mir182    | 0 | 1 | 1.11385   | 0        | 0.957213 | No change |
| NR_029570 | Mir184    | 0 | 1 | 0.113855  | 0        | 0        | No change |
| NR_029571 | Mir185    | 0 | 1 | 0.113855  | 0        | 0        | No change |
| NR_029572 | Mir186    | 0 | 1 | 1.43578   | 0.981591 | 4.04456  | No change |
| NR_029573 | Mir187    | 0 | 1 | -0.886145 | 1.14251  | 0        | No change |
| NR_029574 | Mir188    | 0 | 1 | 0.113855  | 0        | 0        | No change |
| NR_029575 | Mir24-1   | 0 | 1 | -0.886145 | 1.0249   | 0        | No change |
| NR_029576 | Mir190    | 0 | 1 | 0.113855  | 0        | 0        | No change |
| NR_029577 | Mir191    | 0 | 1 | 0.85082   | 1.88359  | 3.88059  | No change |
| NR_029579 | Mir193    | 0 | 1 | 1.11385   | 0        | 1.08774  | No change |
| NR_029580 | Mir194-1  | 0 | 1 | 0.113855  | 1.04019  | 1.07151  | No change |
| NR_029581 | Mir195    | 0 | 1 | 1.11385   | 0        | 0.763734 | No change |
| NR_029585 | Mir199a-1 | 0 | 1 | 0.113855  | 0        | 0        | No change |
| NR_029587 | Mir200b   | 0 | 1 | 0.113855  | 1.99123  | 2.05117  | No change |
| NR_029588 | Mir201    | 0 | 1 | 0.113855  | 0        | 0        | No change |
| NR_029589 | Mir202    | 0 | 1 | -1.88615  | 2.90387  | 0        | No change |
| NR_029590 | Mir203    | 0 | 1 | 0.113855  | 0        | 0        | No change |
| NR_029591 | Mir204    | 0 | 1 | 1.69882   | 1.0249   | 5.27875  | No change |
| NR_029592 | Mir205    | 0 | 1 | 0.113855  | 0        | 0        | No change |
| NR_029593 | Mir206    | 0 | 1 | 0.113855  | 0        | 0        | No change |
| NR_029594 | Mir207    | 0 | 1 | 0.113855  | 0        | 0        | No change |
| NR_029600 | Mir122a   | 0 | 1 | 0.113855  | 0        | 0        | No change |
| NR_029601 | Mir143    | 0 | 1 | 2.11385   | 0        | 3.41862  | No change |
| NR_029602 | Mir30e    | 0 | 1 | -0.886145 | 0.757532 | 0        | No change |
| NR_029640 | Mir290    | 0 | 1 | 0.113855  | 0        | 0        | No change |
| NR_029641 | Mir291a   | 0 | 1 | -0.886145 | 0.849914 | 0        | No change |
| NR_029642 | Mir292    | 0 | 1 | 0.113855  | 0        | 0        | No change |
| NR_029643 | Mir293    | 0 | 1 | 0.113855  | 0        | 0        | No change |
| NR_029644 | Mir294    | 0 | 1 | 0.113855  | 0        | 0        | No change |
| NR_029645 | Mir295    | 0 | 1 | 0.113855  | 0        | 0        | No change |
| NR_029646 | Mir296    | 0 | 1 | -2.47111  | 4.41095  | 0        | No change |
| NR_029647 | Mir297-1  | 0 | 1 | 0.113855  | 0        | 0        | No change |
| NR_029649 | Mir298    | 0 | 1 | -0.886145 | 0.849914 | 0        | No change |
| NR_029650 | Mir299    | 0 | 1 | 0.113855  | 0        | 0        | No change |
| NR_029651 | Mir300    | 0 | 1 | 0.113855  | 0        | 0        | No change |
| NR_029652 | Mir301    | 0 | 1 | -0.886145 | 0.810383 | 0        | No change |
| NR_029653 | Mir302a   | 0 | 1 | 0.113855  | 0        | 0        | No change |
| NR_029654 | Mir34c    | 0 | 1 | -0.886145 | 0.905103 | 0        | No change |
| NR_029655 | Mir34b    | 0 | 1 | -0.886145 | 0.829678 | 0        | No change |
| NR_029656 | Mirlet7d  | 0 | 1 | 0.354863  | 6.7663   | 8.364    | No change |
| NR_029657 | Mir106a   | 0 | 1 | 0.113855  | 0        | 0        | No change |
| NR_029658 | Mir106b   | 0 | 1 | 0.113855  | 0        | 0        | No change |
| NR_029659 | Mir130b   | 0 | 1 | 0.113855  | 0        | 0        | No change |
| NR_029715 | Mir19b-2  | 0 | 1 | 0.113855  | 0        | 0        | No change |
| NR_029716 | Mir30c-1  | 0 | 1 | 1.11385   | 0.783067 | 2.41992  | No change |
| NR_029717 | Mir30c-2  | 0 | 1 | -0.175652 | 8.29678  | 6.83724  | No change |
| NR_029718 | Mir30d    | 0 | 1 | 2.11385   | 0        | 2.6265   | No change |
| NR_029719 | Mir148a   | 0 | 1 | -0.623111 | 2.81588  | 1.45032  | No change |

|           |            |   |   |           |          |          |           |
|-----------|------------|---|---|-----------|----------|----------|-----------|
| NR_029720 | Mir192     | 0 | 1 | -1.47111  | 1.56613  | 0        | No change |
| NR_029721 | Mir196a-1  | 0 | 1 | 0.113855  | 3.41632  | 3.51917  | No change |
| NR_029722 | Mir196a-2  | 0 | 1 | 0.113855  | 0        | 0        | No change |
| NR_029723 | Mir200a    | 0 | 1 | 0.628428  | 15.4873  | 23.1326  | No change |
| NR_029724 | Mir208a    | 0 | 1 | 0.113855  | 0        | 0        | No change |
| NR_029725 | Mirlet7a-1 | 0 | 1 | 0.435783  | 2.22424  | 3.05493  | No change |
| NR_029726 | Mirlet7a-2 | 0 | 1 | 0.435783  | 5.08178  | 6.7304   | No change |
| NR_029727 | Mirlet7b   | 0 | 1 | -0.14918  | 4.09958  | 3.3784   | No change |
| NR_029728 | Mirlet7c-1 | 0 | 1 | 0.435783  | 2.22424  | 3.05493  | No change |
| NR_029729 | Mirlet7c-2 | 0 | 1 | -0.208073 | 2.93444  | 2.26708  | No change |
| NR_029730 | Mirlet7e   | 0 | 1 | 1.11385   | 0        | 0.771946 | No change |
| NR_029731 | Mirlet7f-1 | 0 | 1 | -0.6935   | 4.6984   | 2.41992  | No change |
| NR_029732 | Mirlet7f-2 | 0 | 1 | -0.371572 | 5.03804  | 3.45981  | No change |
| NR_029733 | Mir15a     | 0 | 1 | -2.20807  | 3.31871  | 0        | No change |
| NR_029734 | Mir16-1    | 0 | 1 | -0.471108 | 1.49877  | 0.771946 | No change |
| NR_029735 | Mir16-2    | 0 | 1 | 0.113855  | 0.73361  | 0.755694 | No change |
| NR_029736 | Mir18      | 0 | 1 | 0.113855  | 0        | 0        | No change |
| NR_029737 | Mir20a     | 0 | 1 | -0.301183 | 1.95401  | 1.34189  | No change |
| NR_029738 | Mir21      | 0 | 1 | 0.85082   | 1.51506  | 3.12135  | No change |
| NR_029739 | Mir22      | 0 | 1 | 0.113855  | 0.73361  | 0.755694 | No change |
| NR_029740 | Mir23a     | 0 | 1 | -0.301183 | 2.78772  | 1.91443  | No change |
| NR_029741 | Mir24-2    | 0 | 1 | -0.886145 | 0.651336 | 0        | No change |
| NR_029742 | Mir26a-1   | 0 | 1 | 0.113855  | 0        | 0        | No change |
| NR_029743 | Mir26b     | 0 | 1 | 0.113855  | 2.45975  | 2.5338   | No change |
| NR_029745 | Mir29c     | 0 | 1 | 0.907404  | 11.0875  | 20.3952  | No change |
| NR_029746 | Mir27a     | 0 | 1 | 0.113855  | 0        | 0        | No change |
| NR_029747 | Mir31      | 0 | 1 | -0.886145 | 0.657481 | 0        | No change |
| NR_029748 | Mir92-2    | 0 | 1 | 0.113855  | 0        | 0        | No change |
| NR_029749 | Mir93      | 0 | 1 | 2.11385   | 0        | 2.44742  | No change |
| NR_029750 | Mir96      | 0 | 1 | 1.11385   | 0        | 0.677273 | No change |
| NR_029751 | Mir34a     | 0 | 1 | 0.113855  | 0        | 0        | No change |
| NR_029752 | Mir129-2   | 0 | 1 | 0.113855  | 0        | 0        | No change |
| NR_029753 | Mir98      | 0 | 1 | -0.623111 | 2.58122  | 1.32946  | No change |
| NR_029754 | Mir103-1   | 0 | 1 | 0.113855  | 0        | 0        | No change |
| NR_029755 | Mir103-2   | 0 | 1 | 0.113855  | 0.810383 | 0.834779 | No change |
| NR_029756 | Mir322     | 0 | 1 | 0.113855  | 0        | 0        | No change |
| NR_029757 | Mir323     | 0 | 1 | 0.113855  | 0        | 0        | No change |
| NR_029758 | Mir324     | 0 | 1 | 0.113855  | 0.783067 | 0.80664  | No change |
| NR_029760 | Mir326     | 0 | 1 | 0.113855  | 0        | 0        | No change |
| NR_029761 | Mir328     | 0 | 1 | 0.113855  | 15.0882  | 15.5424  | No change |
| NR_029762 | Mir329     | 0 | 1 | 0.113855  | 0        | 0        | No change |
| NR_029763 | Mir330     | 0 | 1 | 0.113855  | 0        | 0        | No change |
| NR_029764 | Mir331     | 0 | 1 | 1.11385   | 0        | 0.747823 | No change |
| NR_029765 | Mir337     | 0 | 1 | 0.113855  | 0        | 0        | No change |
| NR_029766 | Mir148b    | 0 | 1 | 0.113855  | 0        | 0        | No change |
| NR_029767 | Mir338     | 0 | 1 | -0.886145 | 0.711152 | 0        | No change |
| NR_029768 | Mir339     | 0 | 1 | -0.886145 | 0.725968 | 0        | No change |
| NR_029769 | Mir340     | 0 | 1 | 1.11385   | 0        | 0.732561 | No change |
| NR_029770 | Mir341     | 0 | 1 | 0.113855  | 0        | 0        | No change |
| NR_029772 | Mir344     | 0 | 1 | 0.113855  | 0        | 0        | No change |
| NR_029773 | Mir345     | 0 | 1 | 0.698817  | 2.1779   | 3.73911  | No change |
| NR_029774 | Mir346     | 0 | 1 | 0.113855  | 0        | 0        | No change |
| NR_029775 | Mir350     | 0 | 1 | -2.20807  | 2.81588  | 0        | No change |
| NR_029776 | Mir351     | 0 | 1 | -0.886145 | 0.703969 | 0        | No change |
| NR_029777 | Mir135b    | 0 | 1 | -0.886145 | 0.718484 | 0        | No change |
| NR_029778 | Mir101b    | 0 | 1 | 0.113855  | 0        | 0        | No change |
| NR_029781 | Mir1-2     | 0 | 1 | 0.698817  | 0.967957 | 1.99419  | No change |
| NR_029783 | Mir107     | 0 | 1 | 1.92121   | 0.801068 | 4.9511   | No change |
| NR_029784 | Mir10a     | 0 | 1 | 0.435783  | 1.90072  | 2.61058  | No change |
| NR_029785 | Mir17      | 0 | 1 | -0.471108 | 1.65936  | 0.854654 | No change |
| NR_029786 | Mir19a     | 0 | 1 | 0.113855  | 0.849914 | 0.8755   | No change |
| NR_029787 | Mir25      | 0 | 1 | -2.20807  | 3.31871  | 0        | No change |
| NR_029789 | Mir32      | 0 | 1 | -0.886145 | 2.98684  | 1.02559  | No change |
| NR_029790 | Mir100     | 0 | 1 | -0.301183 | 6.09813  | 4.48694  | No change |
| NR_029791 | Mir139     | 0 | 1 | 0.113855  | 0        | 0        | No change |
| NR_029792 | Mir200c    | 0 | 1 | 0.113855  | 0        | 0        | No change |
| NR_029793 | Mir210     | 0 | 1 | 0.113855  | 0        | 0        | No change |
| NR_029794 | Mir212     | 0 | 1 | -1.47111  | 1.53171  | 0        | No change |
| NR_029795 | Mir181a-1  | 0 | 1 | 0.113855  | 0        | 0        | No change |
| NR_029796 | Mir214     | 0 | 1 | -0.471108 | 1.26714  | 0.652645 | No change |
| NR_029797 | Mir216a    | 0 | 1 | 0.113855  | 0        | 0        | No change |
| NR_029798 | Mir218-1   | 0 | 1 | 0.113855  | 0        | 0        | No change |
| NR_029799 | Mir218-2   | 0 | 1 | 1.11385   | 0        | 0.652645 | No change |
| NR_029800 | Mir219-1   | 0 | 1 | 1.11385   | 0.633572 | 1.95794  | No change |
| NR_029801 | Mir223     | 0 | 1 | 0.698817  | 0.633572 | 1.30529  | No change |
| NR_029802 | Mir320     | 0 | 1 | 0.113855  | 0        | 0        | No change |

|           |           |   |   |           |          |          |           |
|-----------|-----------|---|---|-----------|----------|----------|-----------|
| NR_029803 | Mir26a-2  | 0 | 1 | 1.11385   | 0        | 0.854654 | No change |
| NR_029804 | Mir33     | 0 | 1 | 0.113855  | 0        | 0        | No change |
| NR_029805 | Mir211    | 0 | 1 | 0.113855  | 0        | 0        | No change |
| NR_029806 | Mir221    | 0 | 1 | 0.85082   | 5.86888  | 10.5797  | No change |
| NR_029807 | Mir222    | 0 | 1 | 0.698817  | 0.882189 | 1.81749  | No change |
| NR_029808 | Mir224    | 0 | 1 | 0.113855  | 0        | 0        | No change |
| NR_029809 | Mir29b-2  | 0 | 1 | 0.113855  | 1.72081  | 1.77262  | No change |
| NR_029810 | Mir199a-2 | 0 | 1 | 1.69882   | 0        | 1.30529  | No change |
| NR_029811 | Mir199b   | 0 | 1 | 0.113855  | 0        | 0        | No change |
| NR_029812 | Mir135a-2 | 0 | 1 | 1.11385   | 0.696929 | 2.15373  | No change |
| NR_029813 | Mir124a-1 | 0 | 1 | 0.113855  | 0        | 0        | No change |
| NR_029814 | Mir124a-2 | 0 | 1 | 0.113855  | 0        | 0        | No change |
| NR_029815 | Mir19b-1  | 0 | 1 | -0.886145 | 0.801068 | 0        | No change |
| NR_029816 | Mir92-1   | 0 | 1 | -0.886145 | 0.871162 | 0        | No change |
| NR_029817 | Mir9-1    | 0 | 1 | 1.11385   | 1.56613  | 4.0332   | No change |
| NR_029818 | Mir9-3    | 0 | 1 | 0.113855  | 0        | 0        | No change |
| NR_029819 | Mir138-1  | 0 | 1 | -0.886145 | 0.703969 | 0        | No change |
| NR_029820 | Mir181b-1 | 0 | 1 | 0.113855  | 0        | 0        | No change |
| NR_029821 | Mir181c   | 0 | 1 | 1.11385   | 0        | 0.80664  | No change |
| NR_029822 | Mir125b-1 | 0 | 1 | 1.11385   | 2.71531  | 6.52645  | No change |
| NR_029823 | Mir128-2  | 0 | 1 | 0.113855  | 0        | 0        | No change |
| NR_029825 | Mir7-1    | 0 | 1 | 0.28378   | 4.51713  | 5.31785  | No change |
| NR_029826 | Mir7-2    | 0 | 1 | 0.113855  | 0        | 0        | No change |
| NR_029827 | Mir7b     | 0 | 1 | 0.113855  | 0        | 0        | No change |
| NR_029828 | Mir217    | 0 | 1 | 0.113855  | 0        | 0        | No change |
| NR_029830 | Mir194-2  | 0 | 1 | 0.113855  | 0        | 0        | No change |
| NR_029838 | Mir219-2  | 0 | 1 | 0.113855  | 0        | 0        | No change |
| NR_029851 | Mir362    | 0 | 1 | 0.113855  | 0        | 0        | No change |
| NR_029853 | Mir363    | 0 | 1 | 0.113855  | 0        | 0        | No change |
| NR_029855 | Mir365-1  | 0 | 1 | 0.113855  | 0        | 0        | No change |
| NR_029876 | Mir375    | 0 | 1 | 0.113855  | 0        | 0        | No change |
| NR_029877 | Mir376a   | 0 | 1 | 0.113855  | 0        | 0        | No change |
| NR_029878 | Mir377    | 0 | 1 | -1.47111  | 2.04979  | 0        | No change |
| NR_029880 | Mir379    | 0 | 1 | 1.11385   | 0        | 1.08774  | No change |
| NR_029881 | Mir380    | 0 | 1 | -0.886145 | 1.14251  | 0        | No change |
| NR_029882 | Mir381    | 0 | 1 | 0.113855  | 0        | 0        | No change |
| NR_029883 | Mir382    | 0 | 1 | 0.113855  | 0        | 0        | No change |
| NR_029884 | Mir383    | 0 | 1 | 0.113855  | 0        | 0        | No change |
| NR_029900 | Mir335    | 0 | 1 | 0.113855  | 0        | 0        | No change |
| NR_029901 | Mir133a-2 | 0 | 1 | 0.113855  | 0        | 0        | No change |
| NR_029902 | Mir133b   | 0 | 1 | 0.113855  | 0        | 0        | No change |
| NR_029904 | Mir181b-2 | 0 | 1 | 0.698817  | 4.05192  | 6.67823  | No change |
| NR_029908 | Mir215    | 0 | 1 | 0.113855  | 0        | 0        | No change |
| NR_029910 | Mir384    | 0 | 1 | 0.113855  | 0        | 0        | No change |
| NR_029912 | Mir196b   | 0 | 1 | 1.69882   | 0        | 1.6892   | No change |
| NR_029913 | Mir409    | 0 | 1 | 0.113855  | 0        | 0        | No change |
| NR_029914 | Mir410    | 0 | 1 | -0.886145 | 0.860407 | 0        | No change |
| NR_029915 | Mir376b   | 0 | 1 | 0.113855  | 0        | 0        | No change |
| NR_029916 | Mir411    | 0 | 1 | 0.113855  | 0        | 0        | No change |
| NR_029917 | Mir412    | 0 | 1 | 1.11385   | 0        | 0.897387 | No change |
| NR_029918 | Mir370    | 0 | 1 | -0.886145 | 0.882189 | 0        | No change |
| NR_029947 | Mir425    | 0 | 1 | -0.471108 | 1.63983  | 0.8446   | No change |
| NR_029951 | Mir431    | 0 | 1 | 0.113855  | 0        | 0        | No change |
| NR_029952 | Mir433    | 0 | 1 | 0.113855  | 0        | 0        | No change |
| NR_029953 | Mir434    | 0 | 1 | 0.113855  | 0        | 0        | No change |
| NR_029956 | Mir448    | 0 | 1 | 0.113855  | 0        | 0        | No change |
| NR_029958 | Mir429    | 0 | 1 | 0.735343  | 10.0761  | 16.4341  | No change |
| NR_029959 | Mir365-2  | 0 | 1 | 0.113855  | 0        | 0        | No change |
| NR_029961 | Mir449a   | 0 | 1 | 0.113855  | 0        | 0        | No change |
| NR_029963 | Mir450-1  | 0 | 1 | 0.113855  | 0        | 0        | No change |
| NR_029971 | Mir451    | 0 | 1 | 0.113855  | 0        | 0        | No change |
| NR_029974 | Mir452    | 0 | 1 | 0.113855  | 0        | 0        | No change |
| NR_030147 | Mir463    | 0 | 1 | 0.113855  | 0        | 0        | No change |
| NR_030148 | Mir464    | 0 | 1 | -2.6935   | 5.88954  | 0        | No change |
| NR_030149 | Mir465    | 0 | 1 | 0.113855  | 0        | 0        | No change |
| NR_030150 | Mir466    | 0 | 1 | 1.11385   | 0        | 0.983438 | No change |
| NR_030152 | Mir469    | 0 | 1 | -3.05607  | 7.53437  | 0        | No change |
| NR_030153 | Mir470    | 0 | 1 | 0.113855  | 0        | 0        | No change |
| NR_030154 | Mir471    | 0 | 1 | 0.113855  | 0        | 0        | No change |
| NR_030242 | Mir532    | 0 | 1 | 0.113855  | 0        | 0        | No change |
| NR_030250 | Mir489    | 0 | 1 | 0.113855  | 0        | 0        | No change |
| NR_030251 | Mir483    | 0 | 1 | -0.886145 | 0.954698 | 0        | No change |
| NR_030252 | Mir484    | 0 | 1 | 0.113855  | 1.04019  | 1.07151  | No change |
| NR_030253 | Mir485    | 0 | 1 | 1.11385   | 0        | 0.983438 | No change |
| NR_030254 | Mir486    | 0 | 1 | 0.113855  | 0        | 0        | No change |
| NR_030259 | Mir546    | 0 | 1 | 0.443162  | 21.887   | 28.4791  | No change |

|             |          |   |   |           |          |          |           |
|-------------|----------|---|---|-----------|----------|----------|-----------|
| NR_030260   | Mir540   | 0 | 1 | 0.113855  | 0        | 0        | No change |
| NR_030261   | Mir543   | 0 | 1 | 0.113855  | 0        | 0        | No change |
| NR_030262   | Mir539   | 0 | 1 | 0.113855  | 0        | 0        | No change |
| NR_030263   | Mir541   | 0 | 1 | -1.47111  | 1.54873  | 0        | No change |
| NR_030264   | Mir542   | 0 | 1 | 0.113855  | 0        | 0        | No change |
| NR_030265   | Mir547   | 0 | 1 | -1.47111  | 1.787    | 0        | No change |
| NR_030268   | Mir367   | 0 | 1 | 0.113855  | 0        | 0        | No change |
| NR_030269   | Mir494   | 0 | 1 | 0.113855  | 0        | 0        | No change |
| NR_030270   | Mir376c  | 0 | 1 | 0.113855  | 0        | 0        | No change |
| NR_030271   | Mir487b  | 0 | 1 | 0.113855  | 0        | 0        | No change |
| NR_030272   | Mir369   | 0 | 1 | 0.113855  | 0        | 0        | No change |
| NR_030273   | Mir20b   | 0 | 1 | 0.113855  | 0        | 0        | No change |
| NR_030274   | Mir450-2 | 0 | 1 | -0.886145 | 1.01004  | 0        | No change |
| NR_030275   | Mir503   | 0 | 1 | -0.886145 | 0.981591 | 0        | No change |
| NR_030276   | Mir291b  | 0 | 1 | 0.113855  | 0        | 0        | No change |
| NR_030403   | Mir302b  | 0 | 1 | 1.69882   | 0        | 1.9403   | No change |
| NR_030404   | Mir302c  | 0 | 1 | -0.886145 | 1.0249   | 0        | No change |
| NR_030405   | Mir302d  | 0 | 1 | 0.113855  | 0        | 0        | No change |
| NR_030415   | Mir301b  | 0 | 1 | 0.113855  | 0        | 0        | No change |
| NR_030416   | Mir675   | 0 | 1 | 0.113855  | 0        | 0        | No change |
| NR_030417   | Mir744   | 0 | 1 | 1.33625   | 1.39386  | 4.30746  | No change |
| NR_030418   | Mir374   | 0 | 1 | -0.886145 | 2.20083  | 0.755694 | No change |
| NR_030419   | Mir216b  | 0 | 1 | 0.113855  | 0        | 0        | No change |
| NR_030420   | Mir592   | 0 | 1 | 0.113855  | 0        | 0        | No change |
| NR_030421   | Mir758   | 0 | 1 | 0.113855  | 0        | 0        | No change |
| NR_030422   | Mir551b  | 0 | 1 | 0.113855  | 0        | 0        | No change |
| NR_030424   | Mir668   | 0 | 1 | -0.886145 | 1.05595  | 0        | No change |
| NR_030425   | Mir665   | 0 | 1 | 0.113855  | 0        | 0        | No change |
| NR_030426   | Mir667   | 0 | 1 | 0.113855  | 0        | 0        | No change |
| NR_030427   | Mir770   | 0 | 1 | 0.113855  | 0        | 0        | No change |
| NR_030428   | Mir762   | 0 | 1 | 0.113855  | 0        | 0        | No change |
| NR_030429   | Mir802   | 0 | 1 | 0.113855  | 0        | 0        | No change |
| NR_030430   | Mir672   | 0 | 1 | -0.886145 | 0.696929 | 0        | No change |
| NR_030431   | Mir670   | 0 | 1 | -0.886145 | 0.696929 | 0        | No change |
| NR_030432   | Mir761   | 0 | 1 | -0.734142 | 7.3361   | 3.77847  | No change |
| NR_030433   | Mir764   | 0 | 1 | 0.113855  | 0        | 0        | No change |
| NR_030434   | Mir763   | 0 | 1 | -0.886145 | 0.580774 | 0        | No change |
| NR_030435   | Mir666   | 0 | 1 | 0.113855  | 0        | 0        | No change |
| NR_030436   | Mir759   | 0 | 1 | 0.113855  | 0        | 0        | No change |
| NR_030437   | Mir496   | 0 | 1 | -0.886145 | 0.882189 | 0        | No change |
| NR_030438   | Mir673   | 0 | 1 | 0.113855  | 0        | 0        | No change |
| NR_030439   | Mir760   | 0 | 1 | 2.11385   | 0        | 1.80986  | No change |
| NR_030440   | Mir674   | 0 | 1 | -0.886145 | 0.696929 | 0        | No change |
| NR_030441   | Mir488   | 0 | 1 | 0.113855  | 0        | 0        | No change |
| NR_030442   | Mir677   | 0 | 1 | 0.152329  | 93.9896  | 99.4535  | No change |
| NR_030443   | Mir678   | 0 | 1 | -0.191    | 16.5936  | 13.6745  | No change |
| NR_030444   | Mir497   | 0 | 1 | 0.113855  | 1.65936  | 1.70931  | No change |
| NR_030445   | Mir679   | 0 | 1 | -0.886145 | 0.941796 | 0        | No change |
| NR_030446   | Mir495   | 0 | 1 | 0.113855  | 0        | 0        | No change |
| NR_030447   | Mir680-1 | 0 | 1 | 0.113855  | 0        | 0        | No change |
| NR_030448   | Mir680-2 | 0 | 1 | -2.47111  | 3.16786  | 0        | No change |
| NR_030449   | Mir680-3 | 0 | 1 | 0.113855  | 0        | 0        | No change |
| NR_030450   | Mir681   | 0 | 1 | 0.113855  | 0        | 0        | No change |
| NR_030452   | Mir449c  | 0 | 1 | 0.113855  | 0        | 0        | No change |
| NR_030453   | Mir683-1 | 0 | 1 | -3.20807  | 5.75446  | 0        | No change |
| NR_030454_4 | Mir684-1 | 0 | 1 | 0.113855  | 0        | 0        | No change |
| NR_030458   | Mir719   | 0 | 1 | -0.663753 | 37.3808  | 22.1899  | No change |
| NR_030459   | Mir687   | 0 | 1 | 0.698817  | 0.783067 | 1.61328  | No change |
| NR_030460   | Mir688   | 0 | 1 | 0.113855  | 0        | 0        | No change |
| NR_030463   | Mir690   | 0 | 1 | 0.113855  | 0        | 0        | No change |
| NR_030464   | Mir691   | 0 | 1 | 0.113855  | 0        | 0        | No change |
| NR_030465   | Mir692-1 | 0 | 1 | 0.113855  | 0        | 0        | No change |
| NR_030466   | Mir693   | 0 | 1 | 1.11385   | 0        | 0.80664  | No change |
| NR_030467   | Mir694   | 0 | 1 | 1.11385   | 0        | 1.02559  | No change |
| NR_030468   | Mir146b  | 0 | 1 | 0.113855  | 0        | 0        | No change |
| NR_030469   | Mir669b  | 0 | 1 | 0.113855  | 0        | 0        | No change |
| NR_030472   | Mir467b  | 0 | 1 | 0.113855  | 0.954698 | 0.983438 | No change |
| NR_030473   | Mir669c  | 0 | 1 | 1.69882   | 0        | 1.31727  | No change |
| NR_030474   | Mir297b  | 0 | 1 | 1.11385   | 0        | 0.658633 | No change |
| NR_030475   | Mir695   | 0 | 1 | 0.113855  | 0        | 0        | No change |
| NR_030476   | Mir720   | 0 | 1 | 0.113855  | 0        | 0        | No change |
| NR_030477   | Mir455   | 0 | 1 | 0.113855  | 0        | 0        | No change |
| NR_030478   | Mir491   | 0 | 1 | 1.11385   | 0        | 0.834779 | No change |
| NR_030479   | Mir697   | 0 | 1 | -0.623111 | 2.55754  | 1.31727  | No change |
| NR_030480   | Mir698   | 0 | 1 | 0.113855  | 0.639385 | 0.658633 | No change |
| NR_030481   | Mir700   | 0 | 1 | -0.886145 | 2.64657  | 0.908746 | No change |

|           |               |   |   |            |           |          |           |
|-----------|---------------|---|---|------------|-----------|----------|-----------|
| NR_030482 | Mir701        | 0 | 1 | 1.11385    | 0         | 0.658633 | No change |
| NR_030483 | Mir702        | 0 | 1 | -0.964148  | 11.5089   | 5.26906  | No change |
| NR_030484 | Mir703        | 0 | 1 | 1.11385    | 5.11508   | 11.1968  | No change |
| NR_030486 | Mir705        | 0 | 1 | -0.886145  | 0.849914  | 0        | No change |
| NR_030487 | Mir706        | 0 | 1 | 0.113855   | 0         | 0        | No change |
| NR_030488 | Mir707        | 0 | 1 | 2.43578    | 0         | 3.93375  | No change |
| NR_030489 | Mir708        | 0 | 1 | 0.113855   | 0         | 0        | No change |
| NR_030490 | Mir709        | 0 | 1 | -1.47111   | 1.58393   | 0        | No change |
| NR_030491 | Mir710        | 0 | 1 | 0.113855   | 0         | 0        | No change |
| NR_030492 | Mir711        | 0 | 1 | 0.113855   | 0         | 0        | No change |
| NR_030493 | Mir713        | 0 | 1 | 0.113855   | 0         | 0        | No change |
| NR_030495 | Mir500        | 0 | 1 | 0.113855   | 0         | 0        | No change |
| NR_030496 | Mir501        | 0 | 1 | 0.113855   | 0         | 0        | No change |
| NR_030497 | Mir717        | 0 | 1 | 0.113855   | 0         | 0        | No change |
| NR_030498 | Mir450b       | 0 | 1 | 0.113855   | 0         | 0        | No change |
| NR_030499 | Mir505        | 0 | 1 | -1.47111   | 1.54873   | 0        | No change |
| NR_030500 | Mir721        | 0 | 1 | 0.528892   | 1.58393   | 2.44742  | No change |
| NR_030524 | Mir490        | 0 | 1 | 0.113855   | 0         | 0        | No change |
| NR_030525 | Mir676        | 0 | 1 | 0.113855   | 0         | 0        | No change |
| NR_030526 | Mir615        | 0 | 1 | 0.113855   | 0         | 0        | No change |
| NR_030529 | Mir804        | 0 | 1 | 0.698817   | 2.20083   | 3.77847  | No change |
| NR_030530 | Mir741        | 0 | 1 | 0.113855   | 0         | 0        | No change |
| NR_030531 | Mir742        | 0 | 1 | 0.113855   | 0         | 0        | No change |
| NR_030532 | Mir743        | 0 | 1 | -1.47111   | 2.24816   | 0        | No change |
| NR_030534 | Mir181d       | 0 | 1 | 0.113855   | 0         | 0        | No change |
| NR_030535 | Mir743b       | 0 | 1 | 0.113855   | 0         | 0        | No change |
| NR_030536 | Mir871        | 0 | 1 | 0.113855   | 0         | 0        | No change |
| NR_030537 | Mir879        | 0 | 1 | 0.113855   | 0         | 0        | No change |
| NR_030538 | Mir880        | 0 | 1 | 0.113855   | 0         | 0        | No change |
| NR_030539 | Mir881        | 0 | 1 | -1.47111   | 1.787     | 0        | No change |
| NR_030540 | Mir882        | 0 | 1 | 0.113855   | 0         | 0        | No change |
| NR_030541 | Mir883a       | 0 | 1 | -0.886145  | 0.917012  | 0        | No change |
| NR_030542 | Mir883b       | 0 | 1 | 0.113855   | 0         | 0        | No change |
| NR_030543 | Mir190b       | 0 | 1 | 0.113855   | 0         | 0        | No change |
| NR_030544 | Mir874        | 0 | 1 | 0.113855   | 0         | 0        | No change |
| NR_030545 | Mir876        | 0 | 1 | 0.113855   | 0         | 0        | No change |
| NR_030546 | Mir105        | 0 | 1 | 0.113855   | 0         | 0        | No change |
| NR_030548 | Mir18b        | 0 | 1 | 0.113855   | 0         | 0        | No change |
| NR_030549 | Mir193b       | 0 | 1 | 0.113855   | 0         | 0        | No change |
| NR_030551 | Mir297a-3     | 0 | 1 | 0.113855   | 0         | 0        | No change |
| NR_030555 | Mir297c       | 0 | 1 | 0.113855   | 0         | 0        | No change |
| NR_030557 | Mir344-2      | 0 | 1 | 0.113855   | 0         | 0        | No change |
| NR_030558 | Mir421        | 0 | 1 | 1.69882    | 0         | 1.88924  | No change |
| NR_030559 | Mir453        | 0 | 1 | 0.113855   | 0         | 0        | No change |
| NR_030560 | Mir465b-1     | 0 | 1 | 0.113855   | 0         | 0        | No change |
| NR_030561 | Mir465b-2     | 0 | 1 | 0.113855   | 0         | 0        | No change |
| NR_030562 | Mir465c-1     | 0 | 1 | -0.886145  | 0.860407  | 0        | No change |
| NR_030563 | Mir465c-2     | 0 | 1 | -0.886145  | 0.860407  | 0        | No change |
| NR_030569 | Mir466g       | 0 | 1 | 1.69882    | 0         | 1.79477  | No change |
| NR_030572 | Mir467d       | 0 | 1 | -0.886145  | 0.819917  | 0        | No change |
| NR_030573 | Mir493        | 0 | 1 | 0.113855   | 0         | 0        | No change |
| NR_030574 | Mir504        | 0 | 1 | 0.113855   | 0         | 0        | No change |
| NR_030575 | Mir509        | 0 | 1 | 0.113855   | 0         | 0        | No change |
| NR_030576 | Mir568        | 0 | 1 | -0.471108  | 4.19837   | 2.59485  | No change |
| NR_030577 | Mir574        | 0 | 1 | 0.113855   | 0         | 0        | No change |
| NR_030578 | Mir654        | 0 | 1 | 0.113855   | 0         | 0        | No change |
| NR_030579 | Mir92b        | 0 | 1 | 0.113855   | 0         | 0        | No change |
| NR_030602 | Mir449b       | 0 | 1 | -0.886145  | 0.871162  | 0        | No change |
| NR_030603 | Mir878        | 0 | 1 | 0.113855   | 0         | 0        | No change |
| NR_030604 | Mir872        | 0 | 1 | -0.886145  | 0.860407  | 0        | No change |
| NR_030605 | Mir873        | 0 | 1 | 0.113855   | 0         | 0        | No change |
| NR_030606 | Mir875        | 0 | 1 | 1.92121    | 0.893499  | 5.52238  | No change |
| NR_030607 | Mir208b       | 0 | 1 | 0.113855   | 0         | 0        | No change |
| NR_030608 | Mir877        | 0 | 1 | -0.471108  | 1.63983   | 0.8446   | No change |
| NR_030609 | Mir511        | 0 | 1 | -1.47111   | 1.76438   | 0        | No change |
| NR_030611 | Mir598        | 0 | 1 | -0.886145  | 0.882189  | 0        | No change |
| NR_030612 | Mir653        | 0 | 1 | 0.113855   | 0         | 0        | No change |
| NR_030644 | Mir582        | 0 | 1 | 0.113855   | 0         | 0        | No change |
| NR_030647 | Mir683-2      | 0 | 1 | -3.20807   | 5.75446   | 0        | No change |
| NR_030670 | Gm15760       | 0 | 1 | 0.222108   | 1.53749   | 1.70881  | No change |
| NR_030674 | Gm4532        | 0 | 1 | -0.0305351 | 1.95492   | 1.81239  | No change |
| NR_030676 | A130049A11Rik | 0 | 1 | -0.138532  | 5.95367   | 5.14556  | No change |
| NR_030677 | BC025920      | 0 | 1 | 0.354863   | 0.774366  | 0.949616 | No change |
| NR_030678 | AA387883      | 0 | 1 | -1.47111   | 0.0830172 | 0        | No change |
| NR_030680 | Gm3833        | 0 | 1 | 0.113855   | 0.351731  | 0.362319 | No change |
| NR_030681 | Gm4598        | 0 | 1 | 0.113855   | 0         | 0        | No change |

|           |               |   |   |            |           |           |           |
|-----------|---------------|---|---|------------|-----------|-----------|-----------|
| NR_030682 | 2810410L24Rik | 0 | 1 | 0.755401   | 0.979866  | 1.59816   | No change |
| NR_030683 | Gm14207       | 0 | 1 | 0.113855   | 0.213564  | 0.219993  | No change |
| NR_030690 | E330033B04Rik | 0 | 1 | 0.0537338  | 1.51597   | 1.49743   | No change |
| NR_030692 | A930011G23Rik | 0 | 1 | 0.85082    | 0.103895  | 0.192641  | No change |
| NR_030693 | 4930412C18Rik | 0 | 1 | 0.294427   | 0.77261   | 0.904396  | No change |
| NR_030694 | 1110002L01Rik | 0 | 1 | -0.102539  | 5.89222   | 5.22116   | No change |
| NR_030695 | B330016D10Rik | 0 | 1 | -0.185705  | 2.04027   | 1.70137   | No change |
| NR_030699 | A630072M18Rik | 0 | 1 | 0.382051   | 1.18517   | 1.47298   | No change |
| NR_030702 | Snord4a       | 0 | 1 | 1.57329    | 2.98684   | 10.2559   | No change |
| NR_030703 | Snord104      | 0 | 1 | 0.85082    | 13.3658   | 23.6025   | No change |
| NR_030704 | Snord55       | 0 | 1 | 0.113855   | 0         | 0         | No change |
| NR_030705 | Snord2        | 0 | 1 | 0.85082    | 11.2739   | 20.0592   | No change |
| NR_030706 | C230004F18Rik | 0 | 1 | 0.113855   | 0.160398  | 0.165227  | No change |
| NR_030707 | Vmn1r-ps79    | 0 | 1 | -0.886145  | 0.0303938 | 0         | No change |
| NR_030709 | Gm16386       | 0 | 1 | 0.741886   | 2.46805   | 3.99511   | No change |
| NR_030712 | 3110099E03Rik | 0 | 1 | 0.113855   | 0         | 0         | No change |
| NR_030713 | Mir183        | 0 | 1 | 0.113855   | 0         | 0         | No change |
| NR_030715 | 3930402G23Rik | 0 | 1 | 0.113855   | 0.0489589 | 0.0504327 | No change |
| NR_030716 | 5430417L22Rik | 0 | 1 | 0.139277   | 10.2732   | 10.771    | No change |
| NR_030718 | F630028O10Rik | 0 | 1 | 0.435783   | 0.577219  | 0.749708  | No change |
| NR_030720 | Gm8989        | 0 | 1 | 0.27058    | 1.96042   | 2.25504   | No change |
| NR_030721 | 9130206I24Rik | 0 | 1 | 0.435783   | 0.0726978 | 0.0998484 | No change |
| NR_030756 | Mir423        | 0 | 1 | 0.113855   | 1.27877   | 1.31727   | No change |
| NR_030757 | Mir499        | 0 | 1 | 0.113855   | 0         | 0         | No change |
| NR_030758 | Mir718        | 0 | 1 | 0.113855   | 0         | 0         | No change |
| NR_030759 | Mir343        | 0 | 1 | -0.471108  | 1.85848   | 0.957213  | No change |
| NR_030764 | 2700097O09Rik | 0 | 1 | 0.442803   | 4.75579   | 6.16906   | No change |
| NR_030769 | Nkx2-2as      | 0 | 1 | 0.113855   | 0         | 0         | No change |
| NR_030771 | Gm13034       | 0 | 1 | -0.0372112 | 9.91448   | 9.19165   | No change |
| NR_030776 | 3110021A11Rik | 0 | 1 | -0.564217  | 0.592052  | 0.3485    | No change |
| NR_031758 | Snora26       | 0 | 1 | 0.865927   | 10.3675   | 18.3927   | No change |
| NR_033138 | Gm833         | 0 | 1 | 0.113855   | 0         | 0         | No change |
| NR_033139 | Al427809      | 0 | 1 | 0.354863   | 0.719898  | 0.882821  | No change |
| NR_033141 | Gm6994        | 0 | 1 | -0.886145  | 0.0599251 | 0         | No change |
| NR_033147 | D830046C22Rik | 0 | 1 | 0.3065     | 0.177411  | 0.21321   | No change |
| NR_033168 | Snora28       | 0 | 1 | 0.21339    | 7.48767   | 8.30639   | No change |
| NR_033190 | Gm839         | 0 | 1 | 0.113855   | 0         | 0         | No change |
| NR_033198 | 2700046G09Rik | 0 | 1 | -0.193327  | 9.25842   | 7.6997    | No change |
| NR_033207 | 2010016I18Rik | 0 | 1 | 0.336247   | 0.492055  | 0.599026  | No change |
| NR_033209 | Gm4792        | 0 | 1 | 1.11385    | 0         | 0.0928732 | No change |
| NR_033213 | 1700111N16Rik | 0 | 1 | -1.47111   | 0.307831  | 0.0634196 | No change |
| NR_033214 | B430212C06Rik | 0 | 1 | 0.599282   | 0.371979  | 0.547396  | No change |
| NR_033217 | BC030870      | 0 | 1 | -0.471108  | 0.0941796 | 0.0485074 | No change |
| NR_033219 | BC020402      | 0 | 1 | 0.240967   | 2.38893   | 2.69052   | No change |
| NR_033220 | BC039771      | 0 | 1 | 0.654423   | 0.334419  | 0.51673   | No change |
| NR_033221 | BC031361      | 0 | 1 | 0.445061   | 1.5277    | 1.98422   | No change |
| NR_033222 | 9330151L19Rik | 0 | 1 | 0.0297905  | 7.2266    | 7.02119   | No change |
| NR_033241 | Bmp1          | 0 | 1 | 0.3065     | 3.48934   | 4.11017   | No change |
| NR_033261 | Gm14492       | 0 | 1 | 0.28378    | 0.714003  | 0.831432  | No change |
| NR_033303 | 9330176C04Rik | 0 | 1 | 0.628428   | 0.287394  | 0.444068  | No change |
| NR_033305 | AA388235      | 0 | 1 | 1.43578    | 0.126157  | 0.352736  | No change |
| NR_033325 | Gm5089        | 0 | 1 | 0.113855   | 0         | 0         | No change |
| NR_033332 | Gm12216       | 0 | 1 | 0.435783   | 0.423481  | 0.560867  | No change |
| NR_033340 | B930059L03Rik | 0 | 1 | 0.191857   | 0.907182  | 0.989462  | No change |
| NR_033398 | Gm9159        | 0 | 1 | 0.113855   | 0.0316786 | 0.0326323 | No change |
| NR_033430 | Gm2694        | 0 | 1 | -1.73414   | 1.73721   | 0.421061  | No change |
| NR_033444 | Krt74         | 0 | 1 | 0.113855   | 0.0438596 | 0.04518   | No change |
| NR_033447 | 2810405F15Rik | 0 | 1 | -0.886145  | 0.134977  | 0.0463467 | No change |
| NR_033450 | Serpina3h     | 0 | 1 | 0.998378   | 0.40776   | 0.805067  | No change |
| NR_033451 | Klra13-ps     | 0 | 1 | 0.698817   | 0.0855128 | 0.176174  | No change |
| NR_033452 | Gm4013        | 0 | 1 | -0.208073  | 0.670124  | 0.517723  | No change |
| NR_033453 | 9130209A04Rik | 0 | 1 | 0.113855   | 0         | 0         | No change |
| NR_033454 | Gm5095        | 0 | 1 | 0.113855   | 0         | 0         | No change |
| NR_033456 | Gm4710        | 0 | 1 | 0.113855   | 0         | 0         | No change |
| NR_033458 | Gm10512       | 0 | 1 | 0.113855   | 0.1787    | 0.184079  | No change |
| NR_033459 | LOC668917     | 0 | 1 | 0.891462   | 0.839674  | 1.5303    | No change |
| NR_033462 | Gm10494       | 0 | 1 | 0.528892   | 0.0539837 | 0.0834132 | No change |
| NR_033467 | Gm11468       | 0 | 1 | 0.113855   | 0         | 0         | No change |
| NR_033468 | AU019990      | 0 | 1 | 0.113855   | 0         | 0         | No change |
| NR_033470 | Gm10857       | 0 | 1 | -2.20807   | 0.0997038 | 0         | No change |
| NR_033472 | Gm10768       | 0 | 1 | 0.113855   | 0.102339  | 0.10542   | No change |
| NR_033473 | Gm13939       | 0 | 1 | 0.698817   | 0.361639  | 0.585397  | No change |
| NR_033475 | Gm10823       | 0 | 1 | -0.471108  | 0.427564  | 0.264261  | No change |
| NR_033481 | Gm10474       | 0 | 1 | -0.301183  | 0.0762227 | 0.0523449 | No change |
| NR_033482 | Gm6938        | 0 | 1 | -0.471108  | 0.180786  | 0.0931141 | No change |
| NR_033483 | U90926        | 0 | 1 | -3.05607   | 1.06809   | 0         | No change |

|           |               |   |   |            |           |           |           |
|-----------|---------------|---|---|------------|-----------|-----------|-----------|
| NR_033486 | LOC100415784  | 0 | 1 | 0.113855   | 0         | 0         | No change |
| NR_033490 | 2610100L16Rik | 0 | 1 | -2.6935    | 0.306792  | 0         | No change |
| NR_033491 | Gm10466       | 0 | 1 | -1.47111   | 0.0565231 | 0         | No change |
| NR_033492 | 4931406H21Rik | 0 | 1 | -0.322878  | 2.40258   | 1.82362   | No change |
| NR_033493 | Gm10818       | 0 | 1 | -0.137684  | 1.2016    | 1.03148   | No change |
| NR_033495 | Gm13629       | 0 | 1 | 0.113855   | 0         | 0         | No change |
| NR_033497 | D830015G02Rik | 0 | 1 | -3.20807   | 0.757532  | 0         | No change |
| NR_033498 | AI504432      | 0 | 1 | -0.406977  | 0.402268  | 0.284885  | No change |
| NR_033499 | Gm8773        | 0 | 1 | -3.05607   | 0.439703  | 0         | No change |
| NR_033501 | Gm7271        | 0 | 1 | -0.886145  | 0.0853035 | 0         | No change |
| NR_033502 | C030023E24Rik | 0 | 1 | 0.113855   | 0.0242663 | 0.0249969 | No change |
| NR_033503 | E530011L22Rik | 0 | 1 | 0.077018   | 2.48903   | 2.49878   | No change |
| NR_033504 | Gm9962        | 0 | 1 | 0.113855   | 0         | 0         | No change |
| NR_033505 | Gm14164       | 0 | 1 | -1.47111   | 0.0697976 | 0         | No change |
| NR_033507 | Olfr1077-ps1  | 0 | 1 | 0.113855   | 0         | 0         | No change |
| NR_033508 | Gm11110       | 0 | 1 | 0.113855   | 0         | 0         | No change |
| NR_033509 | Gm9961        | 0 | 1 | 1.11385    | 0.129061  | 0.398839  | No change |
| NR_033510 | 1500017E21Rik | 0 | 1 | -0.225503  | 5.96919   | 4.85439   | No change |
| NR_033511 | Gm10510       | 0 | 1 | -0.886145  | 0.0963941 | 0         | No change |
| NR_033513 | Gm6793        | 0 | 1 | 0.171136   | 34.1773   | 36.6341   | No change |
| NR_033515 | Cyp2d37-ps    | 0 | 1 | 0.113855   | 0         | 0         | No change |
| NR_033517 | 2410017117Rik | 0 | 1 | 0.113855   | 0         | 0         | No change |
| NR_033518 | Gm16039       | 0 | 1 | 0.173797   | 5.26227   | 5.65205   | No change |
| NR_033522 | 1600029O15Rik | 0 | 1 | -2.20807   | 0.154103  | 0         | No change |
| NR_033523 | Gm11517       | 0 | 1 | -0.278463  | 2.04079   | 1.57667   | No change |
| NR_033524 | Gm11529       | 0 | 1 | -0.886145  | 0.168912  | 0.0695986 | No change |
| NR_033526 | Gm16523       | 0 | 1 | 0.461778   | 1.11509   | 1.46605   | No change |
| NR_033532 | B230206H07Rik | 0 | 1 | 0.549954   | 0.379927  | 0.538127  | No change |
| NR_033533 | Gm12603       | 0 | 1 | 0.113855   | 0         | 0         | No change |
| NR_033534 | Olfr1300-ps1  | 0 | 1 | 0.113855   | 0         | 0         | No change |
| NR_033535 | Gm10845       | 0 | 1 | -0.584117  | 1.48064   | 0.932075  | No change |
| NR_033536 | Gm10516       | 0 | 1 | -0.571272  | 2.16123   | 1.37425   | No change |
| NR_033538 | Gm10421       | 0 | 1 | 0.113855   | 0         | 0         | No change |
| NR_033539 | Gm12298       | 0 | 1 | -0.623111  | 0.339966  | 0.1751    | No change |
| NR_033542 | Gm10636       | 0 | 1 | -0.886145  | 0.0288106 | 0         | No change |
| NR_033543 | Gm16287       | 0 | 1 | -0.0787903 | 0.210099  | 0.185506  | No change |
| NR_033544 | Gm14812       | 0 | 1 | -1.88615   | 0.271935  | 0.0400173 | No change |
| NR_033545 | Gm10790       | 0 | 1 | 0.3065     | 0.246555  | 0.296307  | No change |
| NR_033546 | Gm15348       | 0 | 1 | 0.698817   | 0.0190678 | 0.0392837 | No change |
| NR_033548 | D030047H15Rik | 0 | 1 | -0.636167  | 0.989332  | 0.594484  | No change |
| NR_033550 | Gm10248       | 0 | 1 | -0.886145  | 0.1787    | 0.0788912 | No change |
| NR_033551 | Gm12359       | 0 | 1 | -0.156234  | 1.98981   | 1.69101   | No change |
| NR_033552 | Gm10125       | 0 | 1 | -0.886145  | 0.230924  | 0.0951504 | No change |
| NR_033555 | Gm10400       | 0 | 1 | 0.573286   | 0.12721   | 0.187199  | No change |
| NR_033558 | F830002L21Rik | 0 | 1 | -0.886145  | 0.038042  | 0         | No change |
| NR_033559 | AY512915      | 0 | 1 | 0.113855   | 0         | 0         | No change |
| NR_033561 | 2900002K06Rik | 0 | 1 | -0.14918   | 0.912646  | 0.769189  | No change |
| NR_033562 | Gm1995        | 0 | 1 | 1.11385    | 0         | 0.0165379 | No change |
| NR_033563 | Gpx2-ps1      | 0 | 1 | -0.264657  | 0.821528  | 0.634694  | No change |
| NR_033564 | C030002c11rik | 0 | 1 | -0.103376  | 2.57397   | 2.27679   | No change |
| NR_033567 | E130304I02Rik | 0 | 1 | -2.47111   | 0.500668  | 0         | No change |
| NR_033568 | 9430041J12Rik | 0 | 1 | 0.113855   | 0.271296  | 0.279463  | No change |
| NR_033569 | 9430021M05Rik | 0 | 1 | -2.47111   | 0.162228  | 0         | No change |
| NR_033570 | Gm7104        | 0 | 1 | 0.113855   | 0         | 0         | No change |
| NR_033571 | 1810062O18Rik | 0 | 1 | -0.377998  | 4.08321   | 2.96341   | No change |
| NR_033573 | 4930512B01Rik | 0 | 1 | 0.296058   | 2.50129   | 2.93024   | No change |
| NR_033575 | Gm12839       | 0 | 1 | -2.47111   | 0.617845  | 0         | No change |
| NR_033576 | Usp-ps        | 0 | 1 | 0.113855   | 0         | 0         | No change |
| NR_033577 | Gm8221        | 0 | 1 | -0.886145  | 0.0743964 | 0.0340605 | No change |
| NR_033578 | Gm15645       | 0 | 1 | -0.945039  | 1.08121   | 0.510472  | No change |
| NR_033581 | Adh6-ps1      | 0 | 1 | 0.113855   | 0         | 0         | No change |
| NR_033582 | Gm11426       | 0 | 1 | 0.113855   | 0         | 0         | No change |
| NR_033584 | Gm10280       | 0 | 1 | 0.113855   | 0         | 0         | No change |
| NR_033585 | Cyp4f41-ps    | 0 | 1 | -1.20807   | 1.50146   | 0.579999  | No change |
| NR_033591 | Gm6300        | 0 | 1 | 0.528892   | 0.0242714 | 0.0350029 | No change |
| NR_033594 | Gm5712        | 0 | 1 | 0.528892   | 0.134025  | 0.207089  | No change |
| NR_033596 | 5730416F02Rik | 0 | 1 | 0.113855   | 0         | 0         | No change |
| NR_033597 | Gm7134        | 0 | 1 | -2.6935    | 0.173942  | 0         | No change |
| NR_033598 | 4930503H13Rik | 0 | 1 | -2.20807   | 0.439011  | 0         | No change |
| NR_033600 | 5033404E19Rik | 0 | 1 | 0.113855   | 0         | 0         | No change |
| NR_033601 | 4930519F09Rik | 0 | 1 | 1.49237    | 0.405978  | 1.16167   | No change |
| NR_033602 | Gm5779        | 0 | 1 | -0.886145  | 0.076839  | 0         | No change |
| NR_033603 | Gm5176        | 0 | 1 | -1.05607   | 0.999182  | 0.385973  | No change |
| NR_033604 | Gm4971        | 0 | 1 | 0.113855   | 0         | 0         | No change |
| NR_033605 | 1700028B04Rik | 0 | 1 | -2.20807   | 0.505021  | 0         | No change |
| NR_033607 | 4921533I20Rik | 0 | 1 | 0.113855   | 0         | 0         | No change |



|           |               |   |   |            |           |           |           |
|-----------|---------------|---|---|------------|-----------|-----------|-----------|
| NR_033608 | 1700084J12Rik | 0 | 1 | -0.564217  | 1.43009   | 0.883883  | No change |
| NR_033609 | A930017M01Rik | 0 | 1 | -1.88615   | 0.0624116 | 0         | No change |
| NR_033610 | Gm12633       | 0 | 1 | -1.88615   | 0.123715  | 0         | No change |
| NR_033614 | Cyp2c53-ps    | 0 | 1 | 0.113855   | 0         | 0         | No change |
| NR_033617 | Gm12830       | 0 | 1 | 0.113855   | 0         | 0         | No change |
| NR_033620 | Olfr947-ps1   | 0 | 1 | -1.47111   | 0.0640855 | 0         | No change |
| NR_033621 | Olfr856-ps1   | 0 | 1 | -0.471108  | 1.35821   | 0.918155  | No change |
| NR_033622 | Gm6607        | 0 | 1 | -1.47111   | 0.248018  | 0         | No change |
| NR_033624 | 5031434O11Rik | 0 | 1 | 0.988324   | 0.485327  | 0.999874  | No change |
| NR_033625 | D5Erttd605e   | 0 | 1 | 0.85082    | 0.524994  | 0.946397  | No change |
| NR_033626 | 1810010D01Rik | 0 | 1 | -1.47111   | 0.149076  | 0         | No change |
| NR_033627 | AA619741      | 0 | 1 | 0.113855   | 0         | 0         | No change |
| NR_033629 | BC021767      | 0 | 1 | 0.278486   | 8.50829   | 9.82776   | No change |
| NR_033630 | Gm5177        | 0 | 1 | -0.886145  | 0.0184129 | 0         | No change |
| NR_033631 | 4632428C04Rik | 0 | 1 | 0.770967   | 0.717596  | 1.18272   | No change |
| NR_033632 | A630075F10Rik | 0 | 1 | -0.0381483 | 0.337405  | 0.308944  | No change |
| NR_033633 | Gm8709        | 0 | 1 | 0.113855   | 0         | 0         | No change |
| NR_033636 | 1700049E15Rik | 0 | 1 | -0.623111  | 0.681038  | 0.389745  | No change |
| NR_033637 | Gm4349        | 0 | 1 | -0.404612  | 3.23864   | 2.30963   | No change |
| NR_033638 | Olfr29-ps1    | 0 | 1 | -0.886145  | 0.0723707 | 0         | No change |
| NR_033640 | E330012B07Rik | 0 | 1 | 0.113855   | 0         | 0         | No change |
| NR_033642 | Gm3230        | 0 | 1 | -0.940593  | 0.866165  | 0.411803  | No change |
| NR_033643 | Gm6642        | 0 | 1 | 1.11385    | 0         | 0.124421  | No change |
| NR_033644 | Fut4-ps1      | 0 | 1 | 1.69882    | 0.027933  | 0.14387   | No change |
| NR_033648 | Vmn2r-ps129   | 0 | 1 | -3.20807   | 0.371366  | 0         | No change |
| NR_033673 | Trim30e-ps1   | 0 | 1 | -1.47111   | 0.0737491 | 0         | No change |
| NR_033689 | Gm7550        | 0 | 1 | 0.113855   | 0         | 0         | No change |
| NR_033692 | V1rg10        | 0 | 1 | -0.886145  | 0.0689347 | 0         | No change |
| NR_033693 | Gm4541        | 0 | 1 | -0.886145  | 0.140794  | 0         | No change |
| NR_033707 | Zscan4a       | 0 | 1 | -1.47111   | 0.0617571 | 0         | No change |
| NR_033726 | Ces2d-ps      | 0 | 1 | 0.113855   | 0         | 0         | No change |
| NR_033729 | 5730577I03Rik | 0 | 1 | -0.075623  | 1.89399   | 1.70713   | No change |
| NR_033736 | E330020D12Rik | 0 | 1 | 0.698817   | 0.0246526 | 0.0507895 | No change |
| NR_033762 | Bc1           | 0 | 1 | 0.113855   | 0         | 0         | No change |
| NR_033776 | AA545190      | 0 | 1 | -0.886145  | 0.0673362 | 0         | No change |
| NR_033778 | Snord116l1    | 0 | 1 | 0.113855   | 0         | 0         | No change |
| NR_033779 | Snord116l2    | 0 | 1 | 0.113855   | 0         | 0         | No change |
| NR_033780 | 2810001G20Rik | 0 | 1 | 0.250428   | 10.8291   | 12.2706   | No change |
| NR_033784 | 1700041C23Rik | 0 | 1 | -1.47111   | 0.352876  | 0         | No change |
| NR_034038 | 5430416N02Rik | 0 | 1 | 0.248784   | 5.56653   | 6.30751   | No change |
| NR_034042 | Snora5c       | 0 | 1 | 0.476425   | 4.14017   | 5.68641   | No change |
| NR_034043 | Snora47       | 0 | 1 | 0.336247   | 2.76559   | 3.41862   | No change |
| NR_034044 | Snora36b      | 0 | 1 | 1.69882    | 0         | 1.27064   | No change |
| NR_034045 | Snora30       | 0 | 1 | 0.113855   | 3.90802   | 4.02566   | No change |
| NR_034046 | Snora61       | 0 | 1 | 0.561314   | 11.2408   | 16.2109   | No change |
| NR_034047 | Snora19       | 0 | 1 | 0.113855   | 0         | 0         | No change |
| NR_034049 | Snora52       | 0 | 1 | 0.92121    | 4.92778   | 9.4271    | No change |
| NR_034051 | Snora34       | 0 | 1 | 1.37689    | 5.31556   | 13.9932   | No change |
| NR_034052 | Snora2b       | 0 | 1 | 1.11385    | 0         | 0.640991  | No change |
| NR_034155 | Olfr1372-ps1  | 0 | 1 | -0.663753  | 0.906639  | 0.527875  | No change |
| NR_035406 | Mir467a-1     | 0 | 1 | 0.113855   | 0.954698  | 0.983438  | No change |
| NR_035407 | Mir1224       | 0 | 1 | 0.113855   | 0         | 0         | No change |
| NR_035410 | Mir669k       | 0 | 1 | -0.108538  | 3.29258   | 2.82642   | No change |
| NR_035411 | Mir669g       | 0 | 1 | -1.88615   | 1.69983   | 0         | No change |
| NR_035412 | Mir466i       | 0 | 1 | 0.528892   | 2.87987   | 4.1532    | No change |
| NR_035413 | Mir1-2as      | 0 | 1 | 0.599282   | 2.28501   | 3.5307    | No change |
| NR_035414 | Mir1186       | 0 | 1 | 0.113855   | 0         | 0         | No change |
| NR_035415 | Mir1187       | 0 | 1 | 0.113855   | 0         | 0         | No change |
| NR_035416 | Mir669j       | 0 | 1 | -0.371572  | 3.45585   | 2.37326   | No change |
| NR_035417 | Mir669i       | 0 | 1 | 0.113855   | 0.548763  | 0.565283  | No change |
| NR_035418 | Mir669h       | 0 | 1 | 0.113855   | 0         | 0         | No change |
| NR_035419 | Mir1188       | 0 | 1 | 1.11385    | 0         | 0.598258  | No change |
| NR_035420 | Mir467f       | 0 | 1 | 0.113855   | 1.16155   | 1.19652   | No change |
| NR_035421 | Mir1190       | 0 | 1 | 1.11385    | 0         | 0.593314  | No change |
| NR_035423 | Mir1192       | 0 | 1 | 1.11385    | 1.15195   | 2.96657   | No change |
| NR_035424 | Mir1193       | 0 | 1 | -0.886145  | 0.575975  | 0         | No change |
| NR_035426 | Mir669e       | 0 | 1 | -1.47111   | 2.92827   | 0.603285  | No change |
| NR_035428 | Mir1196       | 0 | 1 | 0.113855   | 0         | 0         | No change |
| NR_035429 | Mir1197       | 0 | 1 | 0.113855   | 0         | 0         | No change |
| NR_035431 | Mir1199       | 0 | 1 | 0.113855   | 0         | 0         | No change |
| NR_035432 | Mir1902       | 0 | 1 | 0.206964   | 12.1963   | 13.4608   | No change |
| NR_035433 | Mir1897       | 0 | 1 | 0.113855   | 0         | 0         | No change |
| NR_035434 | Mir1905       | 0 | 1 | -0.301183  | 2.54974   | 1.751     | No change |
| NR_035435 | Mir1895       | 0 | 1 | 0.113855   | 0         | 0         | No change |
| NR_035436 | Mir1903       | 0 | 1 | -1.47111   | 1.74232   | 0         | No change |
| NR_035437 | Mir1899       | 0 | 1 | 0.113855   | 0         | 0         | No change |

|           |               |   |   |           |          |           |           |
|-----------|---------------|---|---|-----------|----------|-----------|-----------|
| NR_035438 | Mir1900       | 0 | 1 | 0.113855  | 0        | 0         | No change |
| NR_035439 | Mir1892       | 0 | 1 | 0.500878  | 55.7544  | 75.3805   | No change |
| NR_035440 | Mir1906-1     | 0 | 1 | 1.69882   | 0        | 1.79477   | No change |
| NR_035441 | Mir1896       | 0 | 1 | 0.383944  | 28.3934  | 35.4523   | No change |
| NR_035442 | Mir1904       | 0 | 1 | 1.11385   | 0        | 0.897387  | No change |
| NR_035443 | Mir1898       | 0 | 1 | 1.11385   | 3.3587   | 7.78456   | No change |
| NR_035444 | Mir1907       | 0 | 1 | 0.113855  | 0.774366 | 0.797677  | No change |
| NR_035445 | Mir1894       | 0 | 1 | 0.961852  | 12.0457  | 23.044    | No change |
| NR_035446 | Mir1893       | 0 | 1 | -0.471108 | 9.23641  | 6.05466   | No change |
| NR_035447 | Mir1901       | 0 | 1 | 1.69882   | 0        | 1.84079   | No change |
| NR_035450 | Mir1929       | 0 | 1 | -0.886145 | 0.749386 | 0         | No change |
| NR_035451 | Mir1930       | 0 | 1 | -0.886145 | 0.829678 | 0         | No change |
| NR_035452 | Mir1931       | 0 | 1 | 0.698817  | 0.585655 | 1.20657   | No change |
| NR_035453 | Mir1932       | 0 | 1 | 0.113855  | 0        | 0         | No change |
| NR_035454 | Mir1933       | 0 | 1 | 1.11385   | 0        | 0.815807  | No change |
| NR_035455 | Mir1934       | 0 | 1 | -0.886145 | 0.839674 | 0         | No change |
| NR_035457 | Mir1936       | 0 | 1 | -0.886145 | 0.749386 | 0         | No change |
| NR_035458 | Mir1937a      | 0 | 1 | 0.113855  | 0        | 0         | No change |
| NR_035459 | Mir1938       | 0 | 1 | -2.20807  | 2.78772  | 0         | No change |
| NR_035461 | Mir1940       | 0 | 1 | 0.698817  | 2.01037  | 3.45149   | No change |
| NR_035462 | Mir1941       | 0 | 1 | 0.113855  | 0        | 0         | No change |
| NR_035463 | Mir1942       | 0 | 1 | 0.113855  | 0        | 0         | No change |
| NR_035464 | Mir1943       | 0 | 1 | 1.11385   | 0        | 0.983438  | No change |
| NR_035465 | Mir1944       | 0 | 1 | -0.886145 | 4.70898  | 1.9403    | No change |
| NR_035466 | Mir1945       | 0 | 1 | 0.113855  | 0        | 0         | No change |
| NR_035467 | Mir1306       | 0 | 1 | 0.961852  | 3.92636  | 8.08912   | No change |
| NR_035468 | Mir1946a      | 0 | 1 | 0.113855  | 0        | 0         | No change |
| NR_035469 | Mir1947       | 0 | 1 | 0.113855  | 0        | 0         | No change |
| NR_035471 | Mir1948       | 0 | 1 | 0.113855  | 0        | 0         | No change |
| NR_035472 | Mir1949       | 0 | 1 | 0.113855  | 13.9386  | 14.3582   | No change |
| NR_035474 | Mir669m-1     | 0 | 1 | 0.113855  | 0        | 0         | No change |
| NR_035475 | Mir669m-2     | 0 | 1 | 0.113855  | 0        | 0         | No change |
| NR_035476 | Mir1951       | 0 | 1 | 0.113855  | 0        | 0         | No change |
| NR_035477 | Mir1952       | 0 | 1 | 0.113855  | 0        | 0         | No change |
| NR_035478 | Mir1953       | 0 | 1 | 0.113855  | 0        | 0         | No change |
| NR_035480 | Mir1955       | 0 | 1 | -0.301183 | 2.13346  | 1.46512   | No change |
| NR_035481 | Mir1956       | 0 | 1 | -1.47111  | 2.1444   | 0         | No change |
| NR_035486 | Mir1960       | 0 | 1 | -0.886145 | 0.893499 | 0         | No change |
| NR_035487 | Mir1961       | 0 | 1 | 0.113855  | 0        | 0         | No change |
| NR_035488 | Mir1962       | 0 | 1 | 0.113855  | 0        | 0         | No change |
| NR_035489 | Mir1963       | 0 | 1 | 0.113855  | 0        | 0         | No change |
| NR_035490 | Mir1964       | 0 | 1 | 0.113855  | 0        | 0         | No change |
| NR_035491 | Mir1965       | 0 | 1 | 0.113855  | 0        | 0         | No change |
| NR_035492 | Mir1966       | 0 | 1 | 0.113855  | 1.93591  | 1.99419   | No change |
| NR_035493 | Mir1967       | 0 | 1 | -0.886145 | 0.849914 | 0         | No change |
| NR_035494 | Mir1968       | 0 | 1 | 0.113855  | 1.0249   | 1.05575   | No change |
| NR_035495 | Mir1969       | 0 | 1 | 0.113855  | 0        | 0         | No change |
| NR_035499 | Mir1971       | 0 | 1 | 0.113855  | 0        | 0         | No change |
| NR_035500 | Mir1983       | 0 | 1 | 0.113855  | 0        | 0         | No change |
| NR_035501 | Mir1839       | 0 | 1 | 0.113855  | 4.77349  | 4.91719   | No change |
| NR_035502 | Mir1981       | 0 | 1 | 1.55443   | 5.09948  | 15.759    | No change |
| NR_035503 | Mir1982       | 0 | 1 | 0.85082   | 1.88359  | 3.88059   | No change |
| NR_035516 | Mir2136       | 0 | 1 | 0.113855  | 0        | 0         | No change |
| NR_035517 | Mir2137       | 0 | 1 | 0.561314  | 10.5595  | 15.2284   | No change |
| NR_035523 | Mir2145-2     | 0 | 1 | 0.113855  | 0        | 0         | No change |
| NR_035526 | Mir432        | 0 | 1 | 0.113855  | 0        | 0         | No change |
| NR_035527 | Mir599        | 0 | 1 | 0.528892  | 1.58393  | 2.44742   | No change |
| NR_035528 | Mir767        | 0 | 1 | 0.113855  | 0        | 0         | No change |
| NR_035529 | Mir664        | 0 | 1 | 1.11385   | 0        | 1.04045   | No change |
| NR_036449 | Gm5084        | 0 | 1 | 0.628428  | 0.25139  | 0.378476  | No change |
| NR_036451 | Gm4814        | 0 | 1 | 1.69882   | 0        | 0.158304  | No change |
| NR_036452 | E230016K23Rik | 0 | 1 | 1.11385   | 0        | 0.0323237 | No change |
| NR_036456 | A730020M07Rik | 0 | 1 | 0.77682   | 0.323333 | 0.545018  | No change |
| NR_036459 | A730018C14Rik | 0 | 1 | 0.113855  | 0        | 0         | No change |
| NR_036469 | LOC100499420  | 0 | 1 | -0.793036 | 0.330075 | 0.170006  | No change |
| NR_036602 | 4933421O10Rik | 0 | 1 | 0.200063  | 7.33134  | 8.01821   | No change |
| NR_036654 | Gm6525        | 0 | 1 | 1.00694   | 0.752082 | 1.54945   | No change |
| NR_036689 | Gm41          | 0 | 1 | -1.47111  | 0.262497 | 0         | No change |
| NR_036696 | Gm8579        | 0 | 1 | -2.20807  | 0.855711 | 0.0979413 | No change |
| NR_037189 | Gm9696        | 0 | 1 | 0.113855  | 0        | 0         | No change |
| NR_037204 | Mir1247       | 0 | 1 | 0.113855  | 0        | 0         | No change |
| NR_037205 | Mir1264       | 0 | 1 | 0.113855  | 0        | 0         | No change |
| NR_037206 | Mir1249       | 0 | 1 | 2.43578   | 0        | 2.93024   | No change |
| NR_037207 | Mir1843       | 0 | 1 | 1.33625   | 2.1444   | 6.62686   | No change |
| NR_037208 | Mir3475       | 0 | 1 | 0.113855  | 0        | 0         | No change |
| NR_037209 | Mir344d-3     | 0 | 1 | 0.113855  | 0        | 0         | No change |

|           |               |   |   |           |          |          |           |
|-----------|---------------|---|---|-----------|----------|----------|-----------|
| NR_037210 | Mir1298       | 0 | 1 | 0.113855  | 0        | 0        | No change |
| NR_037211 | Mir3059       | 0 | 1 | 0.113855  | 0        | 0        | No change |
| NR_037212 | Mir3058       | 0 | 1 | 0.698817  | 0.765856 | 1.57782  | No change |
| NR_037213 | Mir3099       | 0 | 1 | 0.113855  | 0        | 0        | No change |
| NR_037214 | Mir3106       | 0 | 1 | 0.113855  | 0        | 0        | No change |
| NR_037215 | Mir344d-1     | 0 | 1 | 0.113855  | 0        | 0        | No change |
| NR_037216 | Mir344d-2     | 0 | 1 | 0.113855  | 0        | 0        | No change |
| NR_037217 | Mir2861       | 0 | 1 | 0.113855  | 0        | 0        | No change |
| NR_037218 | Mir3057       | 0 | 1 | -0.248715 | 6.12685  | 4.73347  | No change |
| NR_037219 | Mir1251       | 0 | 1 | 1.11385   | 1.65936  | 4.27327  | No change |
| NR_037220 | Mir3060       | 0 | 1 | -0.886145 | 0.839674 | 0        | No change |
| NR_037221 | Mir3061       | 0 | 1 | 0.85082   | 1.53171  | 3.15565  | No change |
| NR_037222 | Mir3062       | 0 | 1 | 0.113855  | 0.663742 | 0.683724 | No change |
| NR_037225 | Mir3065       | 0 | 1 | -0.886145 | 0.801068 | 0        | No change |
| NR_037226 | Mir3066       | 0 | 1 | 1.11385   | 0.839674 | 2.59485  | No change |
| NR_037227 | Mir3067       | 0 | 1 | 0.113855  | 0        | 0        | No change |
| NR_037228 | Mir3068       | 0 | 1 | 0.85082   | 4.41095  | 8.17872  | No change |
| NR_037230 | Mir3070a      | 0 | 1 | -0.886145 | 0.783067 | 0        | No change |
| NR_037231 | Mir3070b      | 0 | 1 | 0.113855  | 0        | 0        | No change |
| NR_037232 | Mir3071       | 0 | 1 | 0.113855  | 0        | 0        | No change |
| NR_037233 | Mir3072       | 0 | 1 | 0.113855  | 0        | 0        | No change |
| NR_037234 | Mir3073       | 0 | 1 | 0.113855  | 0        | 0        | No change |
| NR_037235 | Mir3074-1     | 0 | 1 | 0.403361  | 6.55934  | 8.446    | No change |
| NR_037236 | Mir3075       | 0 | 1 | 1.11385   | 0        | 0.8446   | No change |
| NR_037238 | Mir3077       | 0 | 1 | 0.113855  | 0        | 0        | No change |
| NR_037239 | Mir3078       | 0 | 1 | 0.113855  | 0        | 0        | No change |
| NR_037242 | Mir3081       | 0 | 1 | 0.113855  | 0        | 0        | No change |
| NR_037244 | Mir3083       | 0 | 1 | 1.11385   | 0        | 1.12173  | No change |
| NR_037246 | Mir3085       | 0 | 1 | 0.113855  | 0        | 0        | No change |
| NR_037247 | Mir3086       | 0 | 1 | 0.113855  | 0        | 0        | No change |
| NR_037248 | Mir4660       | 0 | 1 | -0.886145 | 0.829678 | 0        | No change |
| NR_037249 | Mir467a-2     | 0 | 1 | 0.113855  | 0.849914 | 0.8755   | No change |
| NR_037252 | Mir467a-3     | 0 | 1 | 0.698817  | 2.51902  | 4.32476  | No change |
| NR_037254 | Mir467a-4     | 0 | 1 | 0.113855  | 0.849914 | 0.8755   | No change |
| NR_037256 | Mir467a-5     | 0 | 1 | 0.113855  | 0.849914 | 0.8755   | No change |
| NR_037258 | Mir467a-6     | 0 | 1 | 0.698817  | 2.51902  | 4.32476  | No change |
| NR_037261 | Mir467a-7     | 0 | 1 | 0.113855  | 0.849914 | 0.8755   | No change |
| NR_037263 | Mir467a-8     | 0 | 1 | 0.113855  | 0.849914 | 0.8755   | No change |
| NR_037265 | Mir467a-9     | 0 | 1 | 0.113855  | 0.849914 | 0.8755   | No change |
| NR_037267 | Mir467a-10    | 0 | 1 | 0.698817  | 2.51902  | 4.32476  | No change |
| NR_037271 | Mir3088       | 0 | 1 | 0.113855  | 0        | 0        | No change |
| NR_037272 | Mir3089       | 0 | 1 | 0.113855  | 0.829678 | 0.854654 | No change |
| NR_037275 | Mir3092       | 0 | 1 | 0.113855  | 0        | 0        | No change |
| NR_037276 | Mir3093       | 0 | 1 | 1.11385   | 0        | 0.825184 | No change |
| NR_037277 | Mir3094       | 0 | 1 | 0.113855  | 0        | 0        | No change |
| NR_037278 | Mir3095       | 0 | 1 | 0.113855  | 0        | 0        | No change |
| NR_037279 | Mir3096       | 0 | 1 | 0.113855  | 0        | 0        | No change |
| NR_037280 | Mir3097       | 0 | 1 | 0.113855  | 0        | 0        | No change |
| NR_037282 | Mir3100       | 0 | 1 | 1.11385   | 0        | 1.10448  | No change |
| NR_037283 | Mir3101       | 0 | 1 | 1.11385   | 0        | 0.815807 | No change |
| NR_037284 | Mir344e       | 0 | 1 | 0.113855  | 0        | 0        | No change |
| NR_037285 | Mir344b       | 0 | 1 | 0.113855  | 0        | 0        | No change |
| NR_037286 | Mir344c       | 0 | 1 | 1.11385   | 0        | 0.780337 | No change |
| NR_037287 | Mir344g       | 0 | 1 | 0.113855  | 0        | 0        | No change |
| NR_037288 | Mir344f       | 0 | 1 | 0.113855  | 0        | 0        | No change |
| NR_037289 | Mir3102       | 0 | 1 | 1.11385   | 0        | 0.690298 | No change |
| NR_037290 | Mir3103       | 0 | 1 | 0.113855  | 0        | 0        | No change |
| NR_037293 | Mir3107       | 0 | 1 | 0.113855  | 0        | 0        | No change |
| NR_037294 | Mir3074-2     | 0 | 1 | -0.886145 | 0.839674 | 0        | No change |
| NR_037295 | Mir3108       | 0 | 1 | 0.113855  | 0        | 0        | No change |
| NR_037296 | Mir3109       | 0 | 1 | -0.14918  | 3.95983  | 3.26323  | No change |
| NR_037297 | Mir3110       | 0 | 1 | 0.113855  | 0        | 0        | No change |
| NR_037298 | Mir374c       | 0 | 1 | 0.113855  | 1.4223   | 1.46512  | No change |
| NR_037299 | Mir3112       | 0 | 1 | 0.113855  | 0.849914 | 0.8755   | No change |
| NR_037300 | Mir1912       | 0 | 1 | 0.113855  | 0        | 0        | No change |
| NR_037303 | Mir1937b-2    | 0 | 1 | 0.113855  | 0        | 0        | No change |
| NR_037304 | Mir3471-1     | 0 | 1 | 0.113855  | 0        | 0        | No change |
| NR_037307 | Mir1937b-4    | 0 | 1 | 0.113855  | 0        | 0        | No change |
| NR_037308 | Mir1937b-5    | 0 | 1 | 0.113855  | 0        | 0        | No change |
| NR_037310 | Mir1186b      | 0 | 1 | 0.113855  | 0        | 0        | No change |
| NR_037311 | Mir3473       | 0 | 1 | 0.113855  | 0        | 0        | No change |
| NR_037312 | Mir3474       | 0 | 1 | 0.113855  | 0        | 0        | No change |
| NR_037313 | Mir1906-2     | 0 | 1 | 1.69882   | 0        | 1.79477  | No change |
| NR_037571 | Gm7056        | 0 | 1 | 0.113855  | 0        | 0        | No change |
| NR_037588 | B930003M22Rik | 0 | 1 | 0.325359  | 1.02573  | 1.23271  | No change |
| NR_037604 | Rdh18-ps      | 0 | 1 | -0.886145 | 0.362984 | 0.177116 | No change |

|              |               |             |   |            |           |           |           |
|--------------|---------------|-------------|---|------------|-----------|-----------|-----------|
| NR_037666    | LOC100503704  | 0           | 1 | 0.242588   | 3.36857   | 3.79822   | No change |
| NR_037679    | 5330439B14Rik | 0           | 1 | -0.471108  | 0.250334  | 0.154722  | No change |
| NR_037680    | Snora33       | 0           | 1 | 1.11385    | 1.99123   | 4.78606   | No change |
| NR_037681    | Snord100      | 0           | 1 | -0.301183  | 7.17427   | 5.27875   | No change |
| NR_037682    | Snord42a      | 0           | 1 | -0.248715  | 12.3899   | 9.57213   | No change |
| NR_037683    | Snord42b      | 0           | 1 | 0.528892   | 2.53429   | 3.91587   | No change |
| NR_037689    | Gm1968        | 0           | 1 | 0.528892   | 0.141941  | 0.219321  | No change |
| NR_037692    | 4933407L21Rik | 0           | 1 | -0.301183  | 0.424957  | 0.312678  | No change |
| NR_037693    | 2700046A07Rik | 0           | 1 | -0.208073  | 0.130695  | 0.100972  | No change |
| NR_037700    | Gm2049        | 0           | 1 | 0.294427   | 1.62888   | 1.91762   | No change |
| NR_037955    | 1190002F15Rik | 0           | 1 | 1.11385    | 0.239495  | 0.616761  | No change |
| NR_037959    | 1600010M07Rik | 0           | 1 | -1.88615   | 0.339414  | 0         | No change |
| NR_037960    | 1600020E01Rik | 0           | 1 | -0.0840846 | 9.20473   | 8.25042   | No change |
| NR_037963    | 2410004I01Rik | 0           | 1 | 0.698817   | 0.0730534 | 0.150505  | No change |
| NR_037976    | LOC100503248  | 0           | 1 | 0.113855   | 0         | 0         | No change |
| NR_037977    | Gm53          | 0           | 1 | 0.765932   | 3.04977   | 5.00326   | No change |
| NR_037980    | LOC100047133  | 0           | 1 | 0.698817   | 0.0812272 | 0.167345  | No change |
| NR_037986    | LOC100503474  | 0           | 1 | -1.47111   | 0.290629  | 0.0598757 | No change |
| NR_037987    | LOC100503816  | 0           | 1 | 0.336247   | 0.280793  | 0.347096  | No change |
| NR_037988    | LOC100503962  | 0           | 1 | 0.698817   | 0.223375  | 0.383499  | No change |
| NR_037990    | BC055402      | 0           | 1 | 0.113855   | 0         | 0         | No change |
| NR_037993    | B230216N24Rik | 0           | 1 | -0.108538  | 0.354973  | 0.304716  | No change |
| NR_037994    | 2310043L19Rik | 0           | 1 | 1.11385    | 0         | 0.102852  | No change |
| NR_037995    | 0610009B14Rik | 0           | 1 | -0.514176  | 2.44927   | 1.60555   | No change |
| NR_037997    | 2310015D24Rik | 0           | 1 | 1.11385    | 0         | 0.0246112 | No change |
| NR_038004    | 4931429P17Rik | 0           | 1 | 0.113855   | 0         | 0         | No change |
| NR_038006    | 9630028B13Rik | 0           | 1 | 0.113855   | 0.0613854 | 0.0632334 | No change |
| NR_038008    | Al848258      | 0           | 1 | -1.88615   | 0.132328  | 0         | No change |
| NR_038010    | 5530401A14Rik | 0           | 1 | 1.11385    | 0.0379178 | 0.117178  | No change |
| NR_038012    | LOC620079     | 0           | 1 | -0.886145  | 0.0318523 | 0         | No change |
| NR_038014    | LOC432488     | 0           | 1 | -0.886145  | 0.0815122 | 0         | No change |
| NR_038017    | LOC100504069  | 0           | 1 | -0.471108  | 0.153509  | 0.0790649 | No change |
| NR_038018    | LOC100417125  | 0           | 1 | -0.471108  | 0.0556209 | 0.0286476 | No change |
| NR_038019    | LOC100504202  | 0           | 1 | 2.11385    | 0         | 0.102803  | No change |
| NR_038021    | LOC100504265  | 0           | 1 | -0.886145  | 0.0112263 | 0         | No change |
| NR_038023    | LOC100504616  | 0           | 1 | -0.0236487 | 1.78159   | 1.66619   | No change |
| NR_038025    | 4933412E12Rik | 0           | 1 | 0.0516983  | 6.67015   | 6.57945   | No change |
| NR_038027    | B230208H11Rik | 0           | 1 | 0.435783   | 0.176886  | 0.242947  | No change |
| NR_038036    | Gm6150        | 0           | 1 | 0.113855   | 0         | 0         | No change |
| NR_038040    | C730027H18Rik | 0           | 1 | -2.20807   | 0.121205  | 0         | No change |
| NR_038041    | 2310015B20Rik | 0           | 1 | 0.113855   | 0.15732   | 0.162056  | No change |
| NR_038044    | Gm10033       | 0           | 1 | 1.57329    | 0.224093  | 0.769464  | No change |
| NR_038045    | Gm10440       | 0           | 1 | -0.301183  | 0.076001  | 0.0521926 | No change |
| NR_038051    | 4930546C10Rik | 0           | 1 | -2.20807   | 0.120057  | 0         | No change |
| NR_038053    | 4930579G18Rik | 0           | 1 | -0.255379  | 4.3886    | 3.48882   | No change |
| NR_038055    | 2310065F04Rik | 0           | 1 | -3.20807   | 0.230263  | 0         | No change |
| NR_038057    | 1500016L03Rik | 0           | 1 | 0.113855   | 0         | 0         | No change |
| NR_038065    | Zfp133-ps     | 0           | 1 | 0.92121    | 0.134283  | 0.276651  | No change |
| NR_038067    | Gm2011        | 0           | 1 | -0.471108  | 2.54546   | 1.71792   | No change |
| NR_038079    | Gm2447        | 0           | 1 | -0.886145  | 0.038611  | 0         | No change |
| NR_038081    | Raver1-fdx1l  | 0           | 1 | -0.0753181 | 9.62083   | 8.6896    | No change |
| NR_038100    | Olfr230-ps1   | 0           | 1 | -0.886145  | 0.0729006 | 0         | No change |
| NR_038101    | Gm14327       | 0           | 1 | 0.229332   | 1.45589   | 1.63013   | No change |
| NR_038124    | BB283400      | 0           | 1 | 0.599282   | 0.196595  | 0.30377   | No change |
| NR_038136    | 1810007D17Rik | 0           | 1 | 0.113855   | 0         | 0         | No change |
| NR_038140    | 1810018F18Rik | 0           | 1 | 0.113855   | 0         | 0         | No change |
| NR_038151    | 2410004N09Rik | 0           | 1 | 0.539161   | 5.47242   | 7.62675   | No change |
| NM_178113    | Ncapd3        | 0.000198913 | 1 | 0.252525   | 4.25528   | 4.82694   | No change |
| NM_011412    | Slit3         | 0.000232748 | 1 | 0.474602   | 1.21363   | 1.60941   | No change |
| NM_009460    | Sumo1         | 0.000287137 | 1 | 0.173218   | 42.2746   | 45.379    | No change |
| NM_026402    | Atg3          | 0.000383664 | 1 | 0.422959   | 3.8776    | 4.95725   | No change |
| NM_025480    | Tmem128       | 0.000605163 | 1 | 0.331902   | 12.1401   | 14.5567   | No change |
| NM_001159636 | Wdsub1        | 0.000820113 | 1 | 0.354863   | 7.24312   | 8.82601   | No change |
| NM_173866    | Gpt2          | 0.000845098 | 1 | 0.162199   | 16.4736   | 17.5485   | No change |
| NM_001080981 | Ddx23         | 0.000931797 | 1 | 0.171832   | 18.6987   | 20.0525   | No change |
| NM_181748    | O3far1        | 0.00119965  | 1 | 0.686434   | 1.90117   | 2.93761   | No change |
| NM_024478    | Grpel1        | 0.00133911  | 1 | 0.185624   | 13.4876   | 14.6034   | No change |
| NM_001081077 | Cwf19l1       | 0.00218206  | 1 | 0.38196    | 2.74412   | 3.40812   | No change |
| NM_025922    | ltpa          | 0.00225607  | 1 | 0.294771   | 14.7925   | 17.2819   | No change |
| NM_020050    | Tmem9b        | 0.00234529  | 1 | 0.227256   | 17.6611   | 19.6839   | No change |
| NM_023507    | 0610007P08Rik | 0.00239717  | 1 | 0.405458   | 3.18655   | 4.02368   | No change |
| NM_153783    | Paox          | 0.00240063  | 1 | 0.539619   | 2.64809   | 3.67841   | No change |
| NM_011871    | Prkra         | 0.00241578  | 1 | 0.219428   | 20.6298   | 22.8678   | No change |
| NM_001205241 | Myst4         | 0.00264861  | 1 | 0.213785   | 4.71526   | 5.20629   | No change |
| NM_007981    | Acsl1         | 0.00269021  | 1 | 0.0798985  | 68.5108   | 68.9311   | No change |
| NM_001081154 | 4921513D23Rik | 0.0027794   | 1 | 0.124244   | 13.6514   | 14.164    | No change |

|              |               |            |   |           |          |          |           |
|--------------|---------------|------------|---|-----------|----------|----------|-----------|
| NM_026067    | Eri1          | 0.00308417 | 1 | 0.244251  | 5.07533  | 5.72401  | No change |
| NM_025833    | Baiap211      | 0.00309353 | 1 | 0.363214  | 3.39024  | 4.15539  | No change |
| NM_028369    | Mon1a         | 0.00366287 | 1 | 0.433133  | 3.59276  | 4.62615  | No change |
| NM_173749    | Pamr1         | 0.00373038 | 1 | 0.92121   | 0.463968 | 0.855253 | No change |
| NM_025661    | Ormdl3        | 0.00385568 | 1 | 0.161736  | 30.5919  | 32.5774  | No change |
| NM_033615    | Adam33        | 0.00444449 | 1 | 0.577802  | 1.25513  | 1.79194  | No change |
| NM_023363    | Zfp788        | 0.0044525  | 1 | 0.258038  | 6.03969  | 6.87739  | No change |
| NM_172253    | Twistnb       | 0.00476237 | 1 | 0.369112  | 4.61821  | 5.68397  | No change |
| NM_145375    | Tm6sf1        | 0.00531347 | 1 | 0.462862  | 2.97508  | 3.91231  | No change |
| NM_001160366 | Srcrb4d       | 0.00541339 | 1 | 0.654423  | 1.10015  | 1.66036  | No change |
| NM_009841    | Cd14          | 0.00541339 | 1 | 0.654423  | 2.00187  | 3.02126  | No change |
| NM_029397    | Rbm12         | 0.0054548  | 1 | 0.219037  | 8.82307  | 9.7775   | No change |
| NM_007480    | Arf5          | 0.0057288  | 1 | 0.311301  | 16.7323  | 19.7752  | No change |
| NM_025683    | Rpe           | 0.00580862 | 1 | 0.235275  | 10.8382  | 12.1471  | No change |
| NM_175474    | Fam109a       | 0.00599275 | 1 | 0.519111  | 2.17884  | 2.98232  | No change |
| NM_025366    | Chchd1        | 0.00609809 | 1 | 0.373722  | 17.6868  | 21.8389  | No change |
| NM_178601    | Imp4          | 0.0061065  | 1 | 0.312955  | 6.87943  | 8.13993  | No change |
| NM_178802    | Trim65        | 0.00619539 | 1 | 0.698817  | 0.845455 | 1.31813  | No change |
| NR_028428    | 2610005L07Rik | 0.00619637 | 1 | 0.138517  | 22.1648  | 23.226   | No change |
| NM_153107    | Cpz           | 0.00639609 | 1 | 0.798353  | 0.86595  | 1.45366  | No change |
| NM_029734    | Wdyhv1        | 0.00661798 | 1 | 0.550919  | 3.36884  | 4.71738  | No change |
| NM_001029873 | Unc13a        | 0.00693823 | 1 | 0.0143191 | 0.122591 | 0.117261 | No change |
| NM_001081048 | Slc25a18      | 0.00693823 | 1 | 0.0143191 | 0.713754 | 0.682723 | No change |
| NM_001160410 | Scrt2         | 0.00693823 | 1 | 0.0143191 | 0.287394 | 0.274899 | No change |
| NM_011409    | Sfn3          | 0.00693823 | 1 | 0.0143191 | 0.53728  | 0.513922 | No change |
| NM_021887    | Il21r         | 0.00693823 | 1 | 0.0143191 | 0.374262 | 0.357991 | No change |
| NM_007507    | Atp5k         | 0.00709355 | 1 | 0.250634  | 86.1615  | 97.6062  | No change |
| NM_144868    | Pcnx13        | 0.00715629 | 1 | 0.19658   | 5.84292  | 6.37461  | No change |
| NM_019788    | Pldn          | 0.00731006 | 1 | 0.318088  | 4.30844  | 5.11619  | No change |
| NM_023061    | Mcam          | 0.00751379 | 1 | 0.378502  | 3.56658  | 4.41867  | No change |
| NM_025609    | Tab1          | 0.00813011 | 1 | 0.423399  | 2.75729  | 3.52589  | No change |
| NM_021516    | Mark3         | 0.00839085 | 1 | 0.215864  | 10.3675  | 11.4637  | No change |
| NM_145221    | Appl1         | 0.0085755  | 1 | 0.166672  | 8.85053  | 9.45731  | No change |
| NM_028301    | Anks3         | 0.00867837 | 1 | 0.231109  | 12.2377  | 13.6758  | No change |
| NM_001083119 | Ptpru         | 0.00883218 | 1 | 0.472936  | 1.15226  | 1.52608  | No change |
| NM_133792    | Pla2g15       | 0.00900423 | 1 | 0.344025  | 4.73891  | 5.73054  | No change |
| NM_001163538 | Pgam5         | 0.00917283 | 1 | 0.238506  | 13.7106  | 15.401   | No change |
| NM_011626    | Tmem165       | 0.00937262 | 1 | 0.24088   | 14.7399  | 16.5846  | No change |
| NM_016701    | Nes           | 0.00947774 | 1 | 0.365039  | 1.84301  | 2.26178  | No change |
| NM_177325    | Tsr1          | 0.00952654 | 1 | 0.198274  | 12.6209  | 13.7856  | No change |
| NM_009742    | Bcl2a1a       | 0.00960314 | 1 | 0.66487   | 3.67727  | 5.59176  | No change |
| NM_018744    | Sema6a        | 0.00988826 | 1 | 0.591902  | 0.556007 | 0.801843 | No change |
| NM_030021    | D730039F16Rik | 0.00988826 | 1 | 0.591902  | 1.65792  | 2.39096  | No change |
| NM_026121    | Bag4          | 0.0100787  | 1 | 0.1743    | 11.8697  | 12.7509  | No change |
| NM_009564    | Zfp64         | 0.0102565  | 1 | 0.452657  | 2.55684  | 3.3379   | No change |
| NM_178873    | Adck2         | 0.0105694  | 1 | 0.430712  | 2.22529  | 2.86028  | No change |
| NM_001002895 | Al413582      | 0.0106084  | 1 | 0.388612  | 15.5359  | 19.3847  | No change |
| NM_183088    | 2410018M08Rik | 0.0107754  | 1 | 0.253519  | 10.156   | 11.5281  | No change |
| NM_148673    | Slu7          | 0.0109228  | 1 | 0.254624  | 6.72279  | 7.63693  | No change |
| NM_009383    | Tial1         | 0.0110804  | 1 | 0.178384  | 12.763   | 13.7493  | No change |
| NM_028720    | Glyr1         | 0.0111764  | 1 | 0.11991   | 39.7379  | 41.1065  | No change |
| NM_001081379 | Ankrd11       | 0.011294   | 1 | 0.137198  | 11.2625  | 11.7909  | No change |
| NM_172550    | Ybey          | 0.011298   | 1 | 0.455643  | 1.5412   | 2.01624  | No change |
| NM_198109    | Ssh1          | 0.01142    | 1 | 0.433227  | 2.45923  | 3.16658  | No change |
| NM_007885    | Slc26a2       | 0.0114761  | 1 | 0.228607  | 8.26284  | 9.21779  | No change |
| NM_026550    | Pak1ip1       | 0.0115162  | 1 | 0.258833  | 13.875   | 15.8079  | No change |
| NM_173429    | Zfp775        | 0.0115243  | 1 | 0.533963  | 1.19483  | 1.65279  | No change |
| NM_207255    | Zfp532        | 0.0118086  | 1 | 0.281042  | 3.70275  | 4.28447  | No change |
| NM_026932    | Ebna1bp2      | 0.0119595  | 1 | 0.336247  | 4.63835  | 5.57835  | No change |
| NM_201372    | Ccdc84        | 0.0122916  | 1 | 0.435783  | 6.68041  | 8.6174   | No change |
| NM_133854    | Snapi         | 0.0123121  | 1 | 0.195701  | 23.6432  | 25.7788  | No change |
| NM_025403    | Nop10         | 0.012809   | 1 | 0.191968  | 68.3893  | 74.3734  | No change |
| NM_030199    | Zfp623        | 0.0128841  | 1 | 0.395793  | 3.86872  | 4.85152  | No change |
| NM_009940    | Coq7          | 0.0130392  | 1 | 0.376889  | 12.3223  | 15.2484  | No change |
| NM_026603    | Denr          | 0.01306    | 1 | 0.305039  | 7.66747  | 9.02203  | No change |
| NM_145448    | 9030617O03Rik | 0.0135628  | 1 | 0.569049  | 1.31659  | 1.86759  | No change |
| NM_177678    | Ablim2        | 0.0135628  | 1 | 0.569049  | 1.19083  | 1.6892   | No change |
| NM_008481    | Lama2         | 0.0135778  | 1 | 0.161482  | 7.26207  | 7.73202  | No change |
| NM_175255    | Sec24a        | 0.0138405  | 1 | 0.219168  | 5.26952  | 5.84001  | No change |
| NM_001135100 | Il34          | 0.0139409  | 1 | 0.419268  | 4.94334  | 6.30258  | No change |
| NM_001177567 | Otogl         | 0.0142327  | 1 | 0.875695  | 0.219537 | 0.390615 | No change |
| NM_013672    | Sp1           | 0.0142349  | 1 | 0.126845  | 15.7607  | 16.3821  | No change |
| NM_009196    | Slc16a1       | 0.0142404  | 1 | 0.200643  | 9.88865  | 10.8189  | No change |
| NM_001007573 | Maneal        | 0.0143178  | 1 | 0.0207454 | 0.383349 | 0.368564 | No change |
| NM_053132    | Pcdhb7        | 0.0143178  | 1 | 0.0207454 | 0.298173 | 0.286672 | No change |
| NR_038038    | 2210417K05Rik | 0.0143178  | 1 | 0.0207454 | 1.87683  | 1.80444  | No change |

|              |               |           |   |          |          |         |           |
|--------------|---------------|-----------|---|----------|----------|---------|-----------|
| NM_001081430 | Naa30         | 0.0144286 | 1 | 0.198298 | 9.7937   | 10.6976 | No change |
| NM_027371    | Rpf1          | 0.0146988 | 1 | 0.258245 | 19.8336  | 22.5872 | No change |
| NM_007455    | Ap1g2         | 0.0147573 | 1 | 0.514953 | 2.00762  | 2.7395  | No change |
| NM_175291    | Dock10        | 0.0148641 | 1 | 0.329394 | 2.00404  | 2.3986  | No change |
| NM_010740    | Cd93          | 0.0151766 | 1 | 0.365394 | 1.75335  | 2.15222 | No change |
| NM_021789    | Trappc4       | 0.0152519 | 1 | 0.239667 | 25.4785  | 28.6426 | No change |
| NM_026631    | Nhp2          | 0.015299  | 1 | 0.314153 | 16.2432  | 19.2348 | No change |
| NM_199200    | Fam171a2      | 0.0156006 | 1 | 0.366775 | 3.73435  | 4.58832 | No change |
| NM_144899    | Adamtsl4      | 0.0158096 | 1 | 0.606895 | 0.957916 | 1.39635 | No change |
| NM_145219    | Lgi3          | 0.0158096 | 1 | 0.606895 | 1.16118  | 1.69265 | No change |
| NM_010573    | Irx1          | 0.0158115 | 1 | 0.95339  | 0.608377 | 1.14893 | No change |
| NM_025520    | Lsm5          | 0.0158115 | 1 | 0.95339  | 2.50394  | 4.72875 | No change |
| NM_178767    | Agmo          | 0.0158115 | 1 | 0.95339  | 0.582122 | 1.09935 | No change |
| NM_019666    | Syncrip       | 0.0162721 | 1 | 0.210716 | 14.4045  | 15.8704 | No change |
| NM_025464    | Tmem218       | 0.0162771 | 1 | 0.426133 | 8.13084  | 10.4167 | No change |
| NM_153594    | Pcmt2         | 0.0163712 | 1 | 0.205195 | 12.1352  | 13.3189 | No change |
| NM_152800    | Tor2a         | 0.0163834 | 1 | 0.351844 | 8.50821  | 10.3448 | No change |
| NM_026368    | 5830433M19Rik | 0.0166213 | 1 | 0.388217 | 4.85769  | 6.05917 | No change |
| NM_172283    | Fuk           | 0.0167577 | 1 | 0.336247 | 3.69102  | 4.43894 | No change |
| NM_001114879 | D14Abb1e      | 0.016821  | 1 | 0.129224 | 16.9222  | 17.6184 | No change |
| NM_153091    | Stl1          | 0.0169315 | 1 | 0.471407 | 3.43939  | 4.54987 | No change |
| NM_025716    | Spryd4        | 0.0169787 | 1 | 0.449203 | 4.71138  | 6.1352  | No change |
| NM_198957    | C430048L16Rik | 0.016986  | 1 | 0.195385 | 13.9752  | 15.2341 | No change |
| NM_177981    | Hap1          | 0.0169983 | 1 | 0.19527  | 15.1881  | 16.5549 | No change |
| NM_009033    | Rbmxt         | 0.0170647 | 1 | 0.253406 | 15.4739  | 17.5628 | No change |
| NM_173031    | BC066135      | 0.0171122 | 1 | 0.72529  | 1.05186  | 1.67172 | No change |
| NR_033628    | AA474331      | 0.0171122 | 1 | 0.72529  | 3.12324  | 4.96378 | No change |
| NM_001035226 | Xpo1          | 0.0172164 | 1 | 0.162535 | 14.8875  | 15.8625 | No change |
| NM_134189    | Galnt10       | 0.0176586 | 1 | 0.189505 | 11.0002  | 11.9423 | No change |
| NM_001025589 | Rfxank        | 0.0177049 | 1 | 0.323308 | 4.25562  | 5.07176 | No change |
| NM_013926    | Cbx8          | 0.0178011 | 1 | 0.646729 | 2.30142  | 3.45298 | No change |
| NM_001033369 | Acvr1c        | 0.0181954 | 1 | 0.774368 | 0.241486 | 0.39801 | No change |
| NM_001101479 | Pabpc4l       | 0.0181954 | 1 | 0.774368 | 0.400688 | 0.6604  | No change |
| NM_001113350 | Xkr5          | 0.0181954 | 1 | 0.774368 | 0.737231 | 1.21508 | No change |
| NM_028979    | Cyp2j9        | 0.0181954 | 1 | 0.774368 | 1.07551  | 1.77262 | No change |
| NM_016913    | Porcn         | 0.0182444 | 1 | 0.524139 | 2.80567  | 3.85351 | No change |
| NM_001160043 | Dem1          | 0.0187257 | 1 | 0.413415 | 4.56597  | 5.79724 | No change |
| NM_011035    | Pak1          | 0.0187757 | 1 | 0.433315 | 2.64109  | 3.40075 | No change |
| NM_021050    | Cftr          | 0.0188543 | 1 | 0.200421 | 7.31864  | 8.00588 | No change |
| NM_172725    | C330006K01Rik | 0.019017  | 1 | 0.454892 | 1.89889  | 2.48268 | No change |
| NM_021535    | Smu1          | 0.0192177 | 1 | 0.149993 | 27.6813  | 29.2384 | No change |
| NM_026044    | Wdr85         | 0.0194802 | 1 | 0.396927 | 3.35244  | 4.20726 | No change |
| NM_181280    | Bre           | 0.0197409 | 1 | 0.37993  | 8.36528  | 10.3735 | No change |
| NM_001081357 | Map4k3        | 0.0197732 | 1 | 0.157724 | 19.1899  | 20.3784 | No change |
| NM_172704    | Dnajc11       | 0.019833  | 1 | 0.315489 | 5.65782  | 6.70602 | No change |
| NM_028712    | Rap2b         | 0.0200703 | 1 | 0.457809 | 1.71036  | 2.2408  | No change |
| NM_016720    | Neu3          | 0.0200726 | 1 | 0.528892 | 1.54363  | 2.1273  | No change |
| NM_146153    | Thrap3        | 0.020107  | 1 | 0.123423 | 33.872   | 35.124  | No change |
| NM_153560    | Fam102a       | 0.0201961 | 1 | 0.254374 | 6.4454   | 7.3204  | No change |
| NM_008517    | Lta4h         | 0.0205332 | 1 | 0.43829  | 3.84559  | 4.96908 | No change |
| NR_027901    | 2900060B14Rik | 0.020744  | 1 | 0.026392 | 1.86782  | 1.80379 | No change |
| NM_177296    | Tnpo3         | 0.0209364 | 1 | 0.150272 | 23.3246  | 24.6414 | No change |
| NM_133886    | AU040320      | 0.0210354 | 1 | 0.200196 | 10.81    | 11.8232 | No change |
| NM_175356    | Pi4kb         | 0.021317  | 1 | 0.219281 | 10.4388  | 11.5698 | No change |
| NM_024223    | Crip2         | 0.021476  | 1 | 0.261574 | 17.9197  | 20.4547 | No change |
| NR_030455    | Mir684-2      | 0.0217663 | 1 | 0.656382 | 36.4672  | 55.0954 | No change |
| NM_001191051 | Lysmd4        | 0.0218033 | 1 | 0.386227 | 3.22048  | 4.01127 | No change |
| NM_026023    | Nudcd2        | 0.0218052 | 1 | 0.307903 | 11.13    | 13.1221 | No change |
| NR_003270    | Shhg3         | 0.0220891 | 1 | 0.294427 | 45.2924  | 52.8986 | No change |
| NM_009298    | Surf6         | 0.0225385 | 1 | 0.296232 | 7.62606  | 8.91796 | No change |
| NM_029648    | D19Ertd737e   | 0.0225465 | 1 | 0.26707  | 12.192   | 13.9701 | No change |
| NM_144931    | Nae1          | 0.0225859 | 1 | 0.183516 | 32.6878  | 35.3396 | No change |
| NM_010060    | Dnahc11       | 0.0227619 | 1 | 0.311501 | 1.2431   | 1.46929 | No change |
| NM_001115018 | Suv420h2      | 0.0233284 | 1 | 0.446051 | 3.55348  | 4.61678 | No change |
| NM_001081431 | Zfp498        | 0.0233614 | 1 | 0.488703 | 3.14247  | 4.20819 | No change |
| NM_053246    | Dok4          | 0.0234048 | 1 | 0.466871 | 2.67638  | 3.5289  | No change |
| NM_001112715 | Ifitm1        | 0.0236042 | 1 | 0.698817 | 3.87183  | 6.03371 | No change |
| NM_010170    | F2rl2         | 0.0236042 | 1 | 0.698817 | 1.10309  | 1.71902 | No change |
| NM_001081019 | Gm12657       | 0.023632  | 1 | 0.14918  | 100.549  | 106.145 | No change |
| NM_023243    | Ccnh          | 0.0237986 | 1 | 0.359706 | 6.41909  | 7.8476  | No change |
| NM_145443    | L2hgdh        | 0.0238891 | 1 | 0.273431 | 7.11962  | 8.19424 | No change |
| NM_175155    | Sash1         | 0.0239985 | 1 | 0.287992 | 2.93985  | 3.41814 | No change |
| NR_033136    | Atf5          | 0.0240918 | 1 | 0.330666 | 8.48135  | 10.1598 | No change |
| NM_011817    | Gadd45g       | 0.0241667 | 1 | 0.595724 | 3.67824  | 5.31785 | No change |
| NM_009930    | Col3a1        | 0.0242613 | 1 | 0.289078 | 3.77023  | 4.38694 | No change |
| NM_153138    | Wipf1         | 0.0244754 | 1 | 0.56722  | 1.01441  | 1.4368  | No change |

|              |               |           |   |           |          |          |           |
|--------------|---------------|-----------|---|-----------|----------|----------|-----------|
| NM_001163819 | Fance         | 0.0245701 | 1 | 0.469999  | 3.42242  | 4.52255  | No change |
| NM_001205227 | Cyb5r2        | 0.024712  | 1 | 0.378355  | 4.09811  | 5.07613  | No change |
| NM_007978    | F8a           | 0.024753  | 1 | 0.492366  | 2.49103  | 3.34448  | No change |
| NM_198163    | Rab35         | 0.0254689 | 1 | 0.335297  | 6.95963  | 8.364    | No change |
| NM_028894    | Lonrf3        | 0.0255063 | 1 | 0.164786  | 10.7802  | 11.5041  | No change |
| NM_001110195 | Echdc1        | 0.0255475 | 1 | 0.19091   | 18.9491  | 20.5918  | No change |
| NM_019867    | Ngef          | 0.0257123 | 1 | 0.631254  | 1.26668  | 1.87893  | No change |
| NM_172955    | Vcan          | 0.0257123 | 1 | 0.631254  | 0.93048  | 1.38023  | No change |
| NM_011221    | Purb          | 0.0263453 | 1 | 0.519847  | 4.8466   | 6.63561  | No change |
| NM_008002    | Fgf10         | 0.0263906 | 1 | 0.0313927 | 0.259138 | 0.251237 | No change |
| NM_010208    | Fgr           | 0.0263906 | 1 | 0.0313927 | 0.354512 | 0.343703 | No change |
| NM_011414    | Sipi          | 0.0263906 | 1 | 0.0313927 | 1.35249  | 1.31125  | No change |
| NM_025566    | Tnfaip81      | 0.0263906 | 1 | 0.0313927 | 0.500964 | 0.485689 | No change |
| NM_026185    | Abhd15        | 0.0263906 | 1 | 0.0313927 | 0.36466  | 0.353541 | No change |
| NM_194333    | Slc23a3       | 0.0263906 | 1 | 0.0313927 | 0.575695 | 0.558142 | No change |
| NM_025550    | Psmid6        | 0.0267017 | 1 | 0.180546  | 49.9574  | 53.8986  | No change |
| NM_001199357 | Tmem164       | 0.0269144 | 1 | 0.573286  | 2.51182  | 3.57312  | No change |
| NM_001166371 | Zfml          | 0.027027  | 1 | 0.16521   | 18.3711  | 19.6106  | No change |
| NM_023160    | Cml1          | 0.0270926 | 1 | 0.602893  | 3.86034  | 5.60978  | No change |
| NM_207205    | Igsf3         | 0.0272286 | 1 | 0.261412  | 3.69857  | 4.22127  | No change |
| NM_008489    | Lbp           | 0.0272587 | 1 | 0.385934  | 4.36098  | 5.43053  | No change |
| NM_018830    | Asah2         | 0.0273621 | 1 | 0.314258  | 3.67414  | 4.35097  | No change |
| NM_001172424 | Dhrs3         | 0.027582  | 1 | 0.371351  | 8.93764  | 11.0161  | No change |
| NM_009939    | Cops2         | 0.0275821 | 1 | 0.134257  | 42.1374  | 44.0244  | No change |
| NM_027677    | Gpr39         | 0.0276522 | 1 | 0.403361  | 3.70624  | 4.67215  | No change |
| NM_001081086 | Ppig          | 0.0277756 | 1 | 0.216378  | 6.75126  | 7.46754  | No change |
| NM_183183    | Gprin3        | 0.0278194 | 1 | 0.988324  | 0.382187 | 0.741068 | No change |
| NM_001077184 | Bsg           | 0.0279132 | 1 | 0.115834  | 144.548  | 149.104  | No change |
| NM_007964    | Evi5          | 0.0280213 | 1 | 0.183714  | 10.7953  | 11.6726  | No change |
| NM_026919    | 1810006K21Rik | 0.028036  | 1 | 0.372714  | 28.6775  | 35.3802  | No change |
| NM_009624    | Adcy9         | 0.0281143 | 1 | 0.303893  | 4.31574  | 5.07385  | No change |
| NM_032008    | Slmap         | 0.0282147 | 1 | 0.147652  | 24.1549  | 25.4722  | No change |
| NM_001135112 | Dnaja3        | 0.0282635 | 1 | 0.279029  | 9.28688  | 10.7303  | No change |
| NM_031159    | Apobec1       | 0.0282964 | 1 | 0.405195  | 4.36927  | 5.51507  | No change |
| NM_019821    | Gltp          | 0.0283395 | 1 | 0.422404  | 5.58756  | 7.13894  | No change |
| NM_176966    | Fsd1l         | 0.0284166 | 1 | 0.440665  | 3.70977  | 4.80131  | No change |
| NM_010499    | Ier2          | 0.0284341 | 1 | 0.459851  | 4.85378  | 6.36779  | No change |
| NM_145943    | BC031781      | 0.028474  | 1 | 0.305188  | 5.98616  | 7.04407  | No change |
| NM_013719    | Eif2ak4       | 0.0284971 | 1 | 0.374091  | 2.28611  | 2.82316  | No change |
| NM_153538    | Zcchc6        | 0.0285238 | 1 | 0.165578  | 14.7773  | 15.7782  | No change |
| NM_026123    | Unc50         | 0.028834  | 1 | 0.293863  | 14.8073  | 17.2868  | No change |
| NM_007890    | Dyrk1a        | 0.0289378 | 1 | 0.227512  | 6.34941  | 7.07765  | No change |
| NM_145538    | Tmem189       | 0.0290517 | 1 | 0.202962  | 29.558   | 32.3904  | No change |
| NM_001159743 | Fam150b       | 0.0291778 | 1 | 1.63742   | 0.323723 | 1.04804  | No change |
| NR_015508    | Enox          | 0.0291778 | 1 | 1.63742   | 0.128925 | 0.417389 | No change |
| NM_029816    | 2610028H24Rik | 0.0295679 | 1 | 1.69882   | 0.237185 | 0.814418 | No change |
| NM_152915    | Dner          | 0.0295679 | 1 | 1.69882   | 0.115132 | 0.395325 | No change |
| NM_031874    | Rab3d         | 0.0295813 | 1 | 0.321875  | 4.39749  | 5.23534  | No change |
| NM_013760    | Dnajb9        | 0.0296491 | 1 | 0.152535  | 54.9696  | 58.1642  | No change |
| NM_145476    | Tbc1d22a      | 0.0298454 | 1 | 0.234038  | 11.1586  | 12.4951  | No change |
| NM_025966    | 2310039H08Rik | 0.0299872 | 1 | 0.363833  | 16.5893  | 20.3392  | No change |
| NM_001195265 | Pdzd7         | 0.0301384 | 1 | 0.610281  | 0.982094 | 1.43472  | No change |
| NM_028944    | P4htm         | 0.0303093 | 1 | 0.676791  | 1.65569  | 2.53847  | No change |
| NM_025536    | Commmd5       | 0.0304215 | 1 | 0.379749  | 11.662   | 14.4589  | No change |
| NM_133345    | Ing4          | 0.0305902 | 1 | 0.312635  | 11.3353  | 13.4081  | No change |
| NM_001033536 | Rfx7          | 0.0307642 | 1 | 0.224886  | 5.00047  | 5.5638   | No change |
| NM_001080819 | Arid1a        | 0.0308104 | 1 | 0.195228  | 6.89683  | 7.5172   | No change |
| NM_172721    | Fbxw8         | 0.0308398 | 1 | 0.19332   | 11.6062  | 12.6334  | No change |
| NM_178196    | Hist1h2bg     | 0.0310599 | 1 | 0.227162  | 63.6869  | 70.9738  | No change |
| NM_028943    | Sgms2         | 0.0311674 | 1 | 0.147864  | 19.6681  | 20.7437  | No change |
| NM_010592    | Jund          | 0.0312913 | 1 | 0.279139  | 8.35443  | 9.65362  | No change |
| NM_001130185 | Phf17         | 0.0316588 | 1 | 0.214574  | 8.13795  | 8.99002  | No change |
| NM_001110196 | Rnf146        | 0.031744  | 1 | 0.160741  | 21.3588  | 22.7291  | No change |
| NM_016918    | Nudt5         | 0.0317994 | 1 | 0.468698  | 4.51754  | 5.96376  | No change |
| NM_026880    | Pink1         | 0.0320352 | 1 | 0.131643  | 66.4528  | 69.3029  | No change |
| NM_001026214 | Entpd5        | 0.0325633 | 1 | 0.192033  | 12.0252  | 13.0778  | No change |
| NM_011885    | Mrps12        | 0.0329878 | 1 | 0.320686  | 25.6763  | 30.5427  | No change |
| NM_019913    | Txn2          | 0.0330042 | 1 | 0.226081  | 31.5303  | 35.1115  | No change |
| NM_026111    | Qpctl         | 0.0330314 | 1 | 0.372831  | 5.87412  | 7.24747  | No change |
| NM_007534    | Bcl2a1b       | 0.03331   | 1 | 0.617897  | 4.92594  | 7.23548  | No change |
| NM_175388    | Rnf169        | 0.0333327 | 1 | 0.275787  | 3.51581  | 4.05304  | No change |
| NM_153398    | Zbtb24        | 0.0334564 | 1 | 0.334454  | 5.63747  | 6.77082  | No change |
| NM_001033274 | Brd1          | 0.0335281 | 1 | 0.169509  | 16.1988  | 17.3433  | No change |
| NM_001145433 | 1810013D10Rik | 0.0336995 | 1 | 0.404247  | 10.7388  | 13.5455  | No change |
| NM_009053    | Rfng          | 0.0336995 | 1 | 0.404247  | 4.83705  | 6.10122  | No change |
| NM_008609    | Mmp15         | 0.0338803 | 1 | 0.862316  | 0.390893 | 0.687878 | No change |

|              |               |           |   |          |          |          |           |
|--------------|---------------|-----------|---|----------|----------|----------|-----------|
| NM_008961    | Pter          | 0.0338803 | 1 | 0.862316 | 0.462053 | 0.813102 | No change |
| NM_026686    | O610011F06Rik | 0.0339181 | 1 | 0.420744 | 11.5152  | 14.6946  | No change |
| NM_023712    | Spns1         | 0.0340739 | 1 | 0.34901  | 5.36695  | 6.51195  | No change |
| NM_024437    | Nudt7         | 0.034304  | 1 | 0.723908 | 2.37225  | 3.76457  | No change |
| NM_028623    | Cst6          | 0.034304  | 1 | 0.723908 | 0.652655 | 1.03571  | No change |
| NM_027815    | 9030624J02Rik | 0.0343193 | 1 | 0.337155 | 4.4033   | 5.29852  | No change |
| NM_008576    | Abcc1         | 0.0343478 | 1 | 0.200673 | 9.27437  | 10.1469  | No change |
| NM_001039137 | Scoc          | 0.034429  | 1 | 0.325359 | 9.34303  | 11.1501  | No change |
| NM_025800    | Ppp1r2        | 0.0345449 | 1 | 0.183208 | 17.0041  | 18.3795  | No change |
| NM_207649    | Rcan2         | 0.0347063 | 1 | 0.565551 | 1.38847  | 1.96395  | No change |
| NM_024168    | Tsen34        | 0.0347688 | 1 | 0.351105 | 10.5178  | 12.7804  | No change |
| NM_175180    | Wdr44         | 0.0348034 | 1 | 0.592508 | 1.01692  | 1.46655  | No change |
| NM_001003719 | Ralgapa1      | 0.0348199 | 1 | 0.119877 | 27.5036  | 28.4501  | No change |
| NM_144789    | Prdm15        | 0.0350081 | 1 | 0.407846 | 1.59242  | 2.01368  | No change |
| NM_001164581 | Zfp961        | 0.0351892 | 1 | 0.327776 | 6.23083  | 7.44851  | No change |
| NM_001013028 | Al597468      | 0.035367  | 1 | 0.240323 | 9.44489  | 10.6223  | No change |
| NM_001146308 | Dbnl          | 0.0355234 | 1 | 0.340861 | 6.53095  | 7.87913  | No change |
| NM_007704    | Inadl         | 0.0355771 | 1 | 0.317388 | 4.75467  | 5.64271  | No change |
| NR_027943    | 1110038B12Rik | 0.0356829 | 1 | 0.409679 | 17.1259  | 21.6843  | No change |
| NM_019774    | Akap8         | 0.0357026 | 1 | 0.166203 | 24.4821  | 26.1517  | No change |
| NM_029347    | Fggy          | 0.0357071 | 1 | 0.543248 | 2.70015  | 3.75869  | No change |
| NM_029116    | Kbtbd11       | 0.0358869 | 1 | 0.231491 | 5.63781  | 6.30179  | No change |
| NM_016857    | Exoc7         | 0.0361042 | 1 | 0.202175 | 16.4854  | 18.0551  | No change |
| NM_008992    | Abcd4         | 0.0362153 | 1 | 0.7699   | 0.882538 | 1.44889  | No change |
| NM_198420    | Arhgap39      | 0.0368794 | 1 | 0.247824 | 7.47485  | 8.4507   | No change |
| NM_029366    | 2810422J05Rik | 0.0370662 | 1 | 0.238034 | 30.548   | 34.3014  | No change |
| NM_199062_2  | Zfp781        | 0.0371471 | 1 | 0.300556 | 5.19227  | 6.08996  | No change |
| NM_011026    | P2rx4         | 0.0375198 | 1 | 0.464612 | 3.77664  | 4.97098  | No change |
| NM_001039692 | Arhgap12      | 0.0375522 | 1 | 0.199088 | 11.5924  | 12.669   | No change |
| NM_008331    | Ifit1         | 0.0377594 | 1 | 0.548258 | 1.92858  | 2.6942   | No change |
| NM_138952    | Ripk2         | 0.0377594 | 1 | 0.548258 | 2.67627  | 3.73872  | No change |
| NM_145220    | Appl2         | 0.0378778 | 1 | 0.219517 | 15.5478  | 17.2347  | No change |
| NM_026934    | Zc3h15        | 0.038025  | 1 | 0.2058   | 27.4935  | 30.1873  | No change |
| NM_027136    | Ovca2         | 0.0381689 | 1 | 0.325618 | 6.64747  | 7.93451  | No change |
| NM_175028    | Adnp2         | 0.0381752 | 1 | 0.293641 | 5.37508  | 6.274    | No change |
| NM_010435    | Hira          | 0.038494  | 1 | 0.417247 | 2.15244  | 2.73987  | No change |
| NM_023186    | Chia          | 0.0387038 | 1 | 1.77682  | 0.228651 | 0.847925 | No change |
| NM_030137    | Cstad         | 0.0387038 | 1 | 1.77682  | 0.426517 | 1.58169  | No change |
| NR_003517    | Pisd-ps1      | 0.0387955 | 1 | 0.190502 | 23.231   | 25.2374  | No change |
| NR_003518    | Pisd-ps3      | 0.0387955 | 1 | 0.190502 | 23.2962  | 25.3083  | No change |
| NM_009886    | Celsr1        | 0.0388123 | 1 | 0.350689 | 1.3371   | 1.62423  | No change |
| NM_172569    | Unk           | 0.038853  | 1 | 0.403361 | 2.8515   | 3.59438  | No change |
| NM_013790    | Abcc5         | 0.0392708 | 1 | 0.297369 | 3.79053  | 4.43597  | No change |
| NR_030701    | D430050G20    | 0.0392968 | 1 | 0.48783  | 1.32579  | 1.77401  | No change |
| NM_153116    | Gtpbp10       | 0.0394564 | 1 | 0.329584 | 5.87113  | 7.02729  | No change |
| NM_016722    | Galns         | 0.0394913 | 1 | 0.405086 | 4.06946  | 5.13586  | No change |
| NM_181549    | Clec18a       | 0.0395601 | 1 | 0.577255 | 2.4904   | 3.55205  | No change |
| NM_026178    | Mmd           | 0.0395891 | 1 | 0.508486 | 2.30476  | 3.12956  | No change |
| NM_025432    | Trappc2       | 0.0400567 | 1 | 0.633862 | 4.7373   | 7.03833  | No change |
| NM_001163749 | 2310057J16Rik | 0.0400925 | 1 | 0.310252 | 4.65593  | 5.49796  | No change |
| NM_026565    | Apool         | 0.0401215 | 1 | 0.737291 | 2.61349  | 4.18781  | No change |
| NM_026312    | 2610029G23Rik | 0.0407632 | 1 | 0.394483 | 4.3109   | 5.40008  | No change |
| NM_025383    | Necap2        | 0.0412893 | 1 | 0.275493 | 14.2403  | 16.4126  | No change |
| NM_145382    | Fam193b       | 0.0413309 | 1 | 0.294427 | 5.28196  | 6.16863  | No change |
| NM_144556    | Lgi4          | 0.0413472 | 1 | 0.396057 | 3.258    | 4.08567  | No change |
| NM_017475    | Rragc         | 0.0416807 | 1 | 0.249771 | 13.2379  | 14.9863  | No change |
| NM_019835    | B4galt5       | 0.0419546 | 1 | 0.371791 | 3.11662  | 3.84229  | No change |
| NM_009539    | Zap70         | 0.0420653 | 1 | 0.55864  | 2.26982  | 3.19437  | No change |
| NM_008696    | Map4k4        | 0.0420863 | 1 | 0.260385 | 5.55559  | 6.336    | No change |
| NM_133704    | Sec22a        | 0.0420895 | 1 | 0.242522 | 9.34011  | 10.5205  | No change |
| NM_028019    | Rnf135        | 0.0421211 | 1 | 0.58334  | 2.27685  | 3.26156  | No change |
| NM_178263    | Ankrd27       | 0.0421211 | 1 | 0.58334  | 2.31226  | 3.31228  | No change |
| NM_001134902 | AU019823      | 0.0421542 | 1 | 0.233659 | 12.2583  | 13.7225  | No change |
| NM_009632    | Parp2         | 0.042192  | 1 | 0.476425 | 4.05373  | 5.38031  | No change |
| NM_133714    | 2310037I24Rik | 0.0422482 | 1 | 0.307101 | 9.87592  | 11.6363  | No change |
| NM_175375    | Ankhd1        | 0.0422747 | 1 | 0.172527 | 11.0073  | 11.8096  | No change |
| NM_027591    | Dmrtc1a       | 0.0423058 | 1 | 0.27912  | 21.1258  | 24.4101  | No change |
| NM_008316    | Hus1          | 0.0423503 | 1 | 0.349303 | 3.33175  | 4.04324  | No change |
| NR_028418    | Tmem179b      | 0.0425396 | 1 | 0.399257 | 21.107   | 26.5285  | No change |
| NM_001025432 | Crebbp        | 0.0428922 | 1 | 0.183138 | 10.3699  | 11.2081  | No change |
| NM_029330    | Fpgt          | 0.0429409 | 1 | 0.299721 | 6.36657  | 7.46281  | No change |
| NM_029097    | Atp13a2       | 0.043152  | 1 | 0.400885 | 2.54483  | 3.20214  | No change |
| NM_153573    | Fkbp14        | 0.0431688 | 1 | 0.340626 | 6.16798  | 7.43976  | No change |
| NM_001033039 | Klhdc9        | 0.044143  | 1 | 0.447465 | 5.46787  | 7.10985  | No change |
| NM_153118    | Fnbp1l        | 0.044486  | 1 | 0.193551 | 13.3141  | 14.4946  | No change |
| NM_173002    | Zxdc          | 0.0447485 | 1 | 0.34518  | 3.87183  | 4.68505  | No change |



|              |               |           |   |          |          |          |           |
|--------------|---------------|-----------|---|----------|----------|----------|-----------|
| NM_178735    | A730069N07Rik | 0.0447701 | 1 | 0.589588 | 1.25771  | 1.80968  | No change |
| NM_007679    | Cebpd         | 0.0448585 | 1 | 0.710499 | 1.2335   | 1.93772  | No change |
| NM_010112    | Efs           | 0.0448585 | 1 | 0.710499 | 0.780655 | 1.22634  | No change |
| NM_013933    | Vapa          | 0.045111  | 1 | 0.161876 | 68.887   | 73.364   | No change |
| NM_011774    | Slc30a4       | 0.0455567 | 1 | 0.159924 | 21.5595  | 22.9296  | No change |
| NM_181649    | Ccdc75        | 0.0456266 | 1 | 0.435783 | 2.17014  | 2.7986   | No change |
| NM_018742    | Bet1l         | 0.0457114 | 1 | 0.282091 | 17.0191  | 19.7055  | No change |
| NM_009367    | Tgfb2         | 0.0462291 | 1 | 0.524643 | 1.23899  | 1.70171  | No change |
| NM_001025572 | Ankrd12       | 0.0462311 | 1 | 0.198525 | 7.30183  | 7.97677  | No change |
| NM_019971    | Pdgfc         | 0.0464522 | 1 | 0.505433 | 1.82567  | 2.47344  | No change |
| NM_024182    | Riok3         | 0.0465785 | 1 | 0.201691 | 17.2662  | 18.9037  | No change |
| NM_172924    | C230081A13Rik | 0.0467856 | 1 | 0.213268 | 4.97671  | 5.49271  | No change |
| NM_011596    | Atp6v0a2      | 0.0467959 | 1 | 0.384927 | 4.10637  | 5.10925  | No change |
| NM_025664    | Snx9          | 0.0469456 | 1 | 0.547508 | 2.60023  | 3.63008  | No change |
| NM_018871    | Ywhag         | 0.0474761 | 1 | 0.263958 | 8.82803  | 10.0931  | No change |
| NM_001033813 | Zfp872        | 0.0475137 | 1 | 0.596007 | 1.45978  | 2.11007  | No change |
| NR_030457    | Mir686        | 0.0475137 | 1 | 0.596007 | 39.6419  | 57.3011  | No change |
| NM_019651    | Ptpn9         | 0.0476525 | 1 | 0.264586 | 7.78375  | 8.90307  | No change |
| NM_145851    | Cables2       | 0.0476819 | 1 | 0.296921 | 8.02238  | 9.38524  | No change |
| NM_011382    | Six4          | 0.048005  | 1 | 0.528892 | 1.03814  | 1.43015  | No change |
| NM_001163919 | Zfp960        | 0.0482839 | 1 | 0.442478 | 5.93526  | 7.69018  | No change |
| NM_177185    | Ubn2          | 0.0484852 | 1 | 0.153114 | 9.63985  | 10.2041  | No change |
| NM_008783    | Pbx1          | 0.0486332 | 1 | 0.474954 | 1.90168  | 2.52121  | No change |
| NM_172400    | Dnajc8        | 0.0487022 | 1 | 0.28378  | 19.1756  | 22.2284  | No change |
| NM_016774    | Atp5b         | 0.0487055 | 1 | 0.129894 | 126.033  | 131.279  | No change |
| NM_201609    | Zfp652        | 0.0488688 | 1 | 0.327058 | 7.03467  | 8.4048   | No change |
| NM_026399    | Wdr83         | 0.0489328 | 1 | 0.390564 | 9.79529  | 12.2358  | No change |
| NM_010155    | Erf           | 0.0489621 | 1 | 0.284619 | 7.58008  | 8.79199  | No change |
| NM_001039534 | Pstk          | 0.0490659 | 1 | 0.575186 | 4.19763  | 5.97728  | No change |
| NM_001040026 | Sco1          | 0.0492008 | 1 | 0.444772 | 2.06799  | 2.68377  | No change |
| NM_008325    | Idua          | 0.0492008 | 1 | 0.444772 | 2.6233   | 3.40443  | No change |
| NM_001012704 | Wfdc13        | 0.0492726 | 1 | 0.226434 | 44.7099  | 49.7991  | No change |
| NM_008689    | Nfkb1         | 0.0493972 | 1 | 0.278242 | 6.85421  | 7.91479  | No change |
| NM_010747    | Lyn           | 0.0495768 | 1 | 0.512951 | 1.84862  | 2.51787  | No change |
| NM_199310    | Ccdc32        | 0.0495768 | 1 | 0.512951 | 3.35421  | 4.56852  | No change |
| NM_001177552 | Bfar          | 0.0497654 | 1 | 0.287186 | 9.94477  | 11.5554  | No change |
| NM_001170979 | Gm6222        | 0.049851  | 1 | 0.418248 | 16.3983  | 20.8867  | No change |
| NM_026551    | Dcakd         | 0.049851  | 1 | 0.418248 | 6.01783  | 7.66496  | No change |
| NM_010296    | Gli1          | 0.0501124 | 1 | 0.628428 | 1.04673  | 1.54874  | No change |
| NM_172821    | Map3k13       | 0.0501124 | 1 | 0.628428 | 0.571339 | 0.845355 | No change |
| NM_172580    | Acot6         | 0.050234  | 1 | 0.722664 | 1.49178  | 2.36414  | No change |
| NM_181418    | Ushbp1        | 0.050234  | 1 | 0.722664 | 0.765856 | 1.21371  | No change |
| NM_023202    | Ndufa7        | 0.050366  | 1 | 0.245321 | 81.694   | 92.1963  | No change |
| NM_025573    | Srsf9         | 0.0505811 | 1 | 0.420101 | 8.81658  | 11.2444  | No change |
| NM_001167883 | Ankrd50       | 0.0506217 | 1 | 0.394949 | 2.42472  | 3.03815  | No change |
| NM_001085493 | 2310030N02Rik | 0.0508237 | 1 | 0.961852 | 1.22722  | 2.32872  | No change |
| NM_001085532 | Gm13276       | 0.0508237 | 1 | 0.961852 | 0.905722 | 1.71866  | No change |
| NM_009225    | Snrpb         | 0.0509488 | 1 | 0.204716 | 57.321   | 62.8891  | No change |
| NM_172491    | D130040H23Rik | 0.0511336 | 1 | 0.803515 | 1.04435  | 1.75712  | No change |
| NM_001081298 | Lphn2         | 0.0512656 | 1 | 0.248738 | 6.33363  | 7.16486  | No change |
| NR_033229    | A230073K19Rik | 0.0512656 | 1 | 0.248738 | 5.25948  | 5.94975  | No change |
| NR_028576    | Scarna13      | 0.0512745 | 1 | 0.333876 | 66.3742  | 79.6801  | No change |
| NM_010634    | Fabp5         | 0.0513204 | 1 | 0.659823 | 3.66411  | 5.54608  | No change |
| NM_174870    | Slc26a1       | 0.0513204 | 1 | 0.659823 | 1.05956  | 1.60377  | No change |
| NM_001081319 | C030046E11Rik | 0.0513828 | 1 | 0.27723  | 4.61513  | 5.32547  | No change |
| NM_008947    | Psmc1         | 0.0514552 | 1 | 0.249442 | 25.551   | 28.9185  | No change |
| NM_025554    | Polr2e        | 0.0515973 | 1 | 0.270724 | 30.6289  | 35.1833  | No change |
| NM_001160368 | Rnf152        | 0.0517109 | 1 | 0.537663 | 0.671559 | 0.930908 | No change |
| NM_207176    | Tes           | 0.0517442 | 1 | 0.209538 | 24.9433  | 27.4581  | No change |
| NM_134116    | Gpsm3         | 0.0517522 | 1 | 0.85082  | 1.34923  | 2.35205  | No change |
| NM_001085495 | Arfgef2       | 0.0520155 | 1 | 0.203456 | 7.55219  | 8.27854  | No change |
| NM_001001984 | Kdm2a         | 0.0520542 | 1 | 0.169605 | 15.3296  | 16.4136  | No change |
| NR_003961    | Asb7          | 0.0520843 | 1 | 0.279483 | 5.65712  | 6.53808  | No change |
| NM_011578    | Tgfbr3        | 0.0523333 | 1 | 0.266167 | 5.36542  | 6.14368  | No change |
| NM_008306    | Ndst1         | 0.0526977 | 1 | 0.260602 | 5.67001  | 6.46734  | No change |
| NM_025845    | Prpf38b       | 0.052719  | 1 | 0.200053 | 23.347   | 25.5321  | No change |
| NM_008185    | Gstt1         | 0.0528569 | 1 | 0.425799 | 9.67771  | 12.3921  | No change |
| NM_199029    | Zfp395        | 0.0529593 | 1 | 0.502627 | 1.58206  | 2.13896  | No change |
| NM_019831    | Zmym3         | 0.0529868 | 1 | 0.180533 | 17.3526  | 18.7212  | No change |
| NM_025295    | Btd           | 0.0529913 | 1 | 0.401017 | 5.99316  | 7.54138  | No change |
| NM_153405    | Rbm45         | 0.0530615 | 1 | 0.454279 | 4.51884  | 5.90374  | No change |
| NM_177622    | Zfp595        | 0.0531339 | 1 | 0.440083 | 2.37124  | 3.06705  | No change |
| NM_001098476 | Grsf1         | 0.053322  | 1 | 0.185892 | 35.9548  | 38.935   | No change |
| NM_172594    | Dhx29         | 0.0535279 | 1 | 0.322633 | 4.89789  | 5.83367  | No change |
| NM_172298    | Tshz3         | 0.053595  | 1 | 0.470789 | 1.57443  | 2.08111  | No change |
| NM_009480    | Usf1          | 0.0536057 | 1 | 0.402576 | 6.35312  | 8.00306  | No change |

|              |               |           |   |          |          |          |           |
|--------------|---------------|-----------|---|----------|----------|----------|-----------|
| NM_178900    | Prkd2         | 0.0536448 | 1 | 0.487072 | 1.99947  | 2.67359  | No change |
| NM_172653    | Slc39a10      | 0.0538053 | 1 | 0.172748 | 21.9011  | 23.501   | No change |
| NM_027008    | Kctd5         | 0.0538192 | 1 | 0.350153 | 6.66579  | 8.09365  | No change |
| NM_028007    | Itfg1         | 0.0538293 | 1 | 0.171165 | 33.2989  | 35.6922  | No change |
| NM_029857    | Tmco4         | 0.0540749 | 1 | 0.456743 | 2.55946  | 3.34967  | No change |
| NM_001039530 | Parp14        | 0.0541075 | 1 | 0.285807 | 3.78693  | 4.39597  | No change |
| NM_145585    | Thumpd1       | 0.0544258 | 1 | 0.235021 | 17.351   | 19.4417  | No change |
| NM_145925    | Pttg1ip       | 0.0547083 | 1 | 0.172821 | 49.0363  | 52.6212  | No change |
| NM_001177845 | Tirap         | 0.0547552 | 1 | 0.473585 | 1.64363  | 2.17686  | No change |
| NM_009124    | Atxn1         | 0.0548476 | 1 | 0.343677 | 3.18244  | 3.84665  | No change |
| NM_001177607 | 0610010K14Rik | 0.0551091 | 1 | 0.459242 | 11.9445  | 15.6598  | No change |
| NM_001145952 | Lpp           | 0.0552322 | 1 | 0.16239  | 8.70146  | 9.27025  | No change |
| NM_176836    | Fam76b        | 0.0553181 | 1 | 0.311563 | 6.05448  | 7.15564  | No change |
| NM_178732    | Zfp324        | 0.0554895 | 1 | 0.345397 | 3.99731  | 4.8374   | No change |
| NM_015765    | Hspa14        | 0.0557797 | 1 | 0.297959 | 13.9697  | 16.3544  | No change |
| NM_001167908 | Ppp1r3e       | 0.0559024 | 1 | 0.735343 | 1.42998  | 2.28708  | No change |
| NM_011778    | Coro1b        | 0.0561211 | 1 | 0.253258 | 20.8247  | 23.6318  | No change |
| NR_028555    | Snord89       | 0.0561465 | 1 | 0.912221 | 16.3111  | 29.7856  | No change |
| NM_010686    | Laptn5        | 0.0561595 | 1 | 0.408983 | 4.7082   | 5.95763  | No change |
| NM_018864    | Impa1         | 0.0562086 | 1 | 0.200349 | 28.1612  | 30.803   | No change |
| NM_013585    | Psmb9         | 0.0563667 | 1 | 0.616355 | 5.10159  | 7.48194  | No change |
| NM_001166360 | 6030458C11Rik | 0.0568008 | 1 | 0.593023 | 2.27984  | 3.28786  | No change |
| NM_001033328 | BC023829      | 0.0568216 | 1 | 0.410629 | 5.64131  | 7.14661  | No change |
| NM_027830    | Mcm9          | 0.0568893 | 1 | 0.36783  | 3.81485  | 4.68968  | No change |
| NM_016658    | Galt          | 0.0571245 | 1 | 0.64437  | 1.84686  | 2.76395  | No change |
| NM_029983    | Sla2          | 0.0574573 | 1 | 0.34185  | 7.11379  | 8.58744  | No change |
| NR_030708_2  | 6820431F20Rik | 0.0576221 | 1 | 0.14103  | 48.4197  | 50.826   | No change |
| NM_019410    | Pfn2          | 0.0576848 | 1 | 0.189336 | 43.6443  | 47.3749  | No change |
| NM_026012    | Nradd         | 0.0580235 | 1 | 0.573286 | 4.25103  | 6.04426  | No change |
| NM_001082962 | Snrpn         | 0.0580473 | 1 | 0.391193 | 6.14345  | 7.67707  | No change |
| NM_019636    | Tbc1d1        | 0.0580985 | 1 | 0.171177 | 22.1447  | 23.7365  | No change |
| NM_026276    | Aasdhppt      | 0.0583886 | 1 | 0.227714 | 18.3096  | 20.4116  | No change |
| NM_017476    | Akap8l        | 0.0585074 | 1 | 0.201081 | 36.1246  | 39.5335  | No change |
| NM_026538    | Ddx56         | 0.0585748 | 1 | 0.255629 | 11.6826  | 13.2793  | No change |
| NM_028766    | Tmem43        | 0.0585958 | 1 | 0.392571 | 4.45057  | 5.56695  | No change |
| NM_033314    | Sco2a1        | 0.0587514 | 1 | 0.453705 | 2.19464  | 2.86594  | No change |
| NM_029031    | Shpk          | 0.059136  | 1 | 0.500037 | 2.50604  | 3.38174  | No change |
| NM_177460    | Parp16        | 0.059168  | 1 | 0.517211 | 2.58226  | 3.52739  | No change |
| NM_027185    | Def6          | 0.0595413 | 1 | 0.623529 | 1.77523  | 2.61689  | No change |
| NM_146215    | Ftsjd1        | 0.0597497 | 1 | 0.456087 | 2.45494  | 3.21123  | No change |
| NM_012058    | Srp9          | 0.0599796 | 1 | 0.192039 | 63.0651  | 68.5842  | No change |
| NM_001177793 | Snap23        | 0.0602405 | 1 | 0.325139 | 9.64979  | 11.5133  | No change |
| NM_001034030 | Limk2         | 0.060302  | 1 | 0.245099 | 11.4997  | 12.9759  | No change |
| NM_153563    | Fam40a        | 0.060422  | 1 | 0.272871 | 10.1595  | 11.6874  | No change |
| NM_019966    | Mlycd         | 0.0604228 | 1 | 0.444244 | 4.48026  | 5.81165  | No change |
| NM_130892    | Rtn4ip1       | 0.0604387 | 1 | 0.408038 | 3.9043   | 4.93698  | No change |
| NM_175429    | Kctd12b       | 0.0604535 | 1 | 0.578818 | 1.01742  | 1.45229  | No change |
| NM_001177646 | Sirpa         | 0.0606935 | 1 | 0.368038 | 3.959    | 4.8675   | No change |
| NM_001025103 | Efcab4a       | 0.0608195 | 1 | 0.52103  | 3.75937  | 5.1492   | No change |
| NM_175515    | Intu          | 0.0609219 | 1 | 0.378067 | 2.22693  | 2.75728  | No change |
| NM_001081011 | Srgap2        | 0.0613344 | 1 | 0.228757 | 6.68324  | 7.4559   | No change |
| NM_001025599 | Trim26        | 0.0613963 | 1 | 0.287647 | 8.98632  | 10.4448  | No change |
| NM_019653    | Wsb1          | 0.0615285 | 1 | 0.300623 | 10.3     | 12.0805  | No change |
| NM_010688    | Lasp1         | 0.0615412 | 1 | 0.249207 | 12.3632  | 13.9901  | No change |
| NM_001081316 | Dsel          | 0.0615488 | 1 | 0.370195 | 2.60003  | 3.20151  | No change |
| NM_001163780 | Ick           | 0.0616577 | 1 | 0.321546 | 3.20893  | 3.81901  | No change |
| NM_010302    | Gna12         | 0.0616577 | 1 | 0.321546 | 11.4548  | 13.6326  | No change |
| NM_001042491 | Anapc5        | 0.0616617 | 1 | 0.178024 | 41.6774  | 44.8859  | No change |
| NM_175521    | 6430598A04Rik | 0.0618879 | 1 | 0.74857  | 0.736543 | 1.18934  | No change |
| NM_011864    | Papss2        | 0.0619508 | 1 | 0.561314 | 1.45713  | 2.05399  | No change |
| NM_145387    | Athl1         | 0.0619508 | 1 | 0.561314 | 1.78039  | 2.50967  | No change |
| NM_145420    | Ube2d1        | 0.0620749 | 1 | 0.506866 | 4.77282  | 6.47172  | No change |
| NM_027808    | Alpk1         | 0.0620773 | 1 | 0.390816 | 2.73249  | 3.41363  | No change |
| NM_153591    | Nars2         | 0.0622731 | 1 | 0.448645 | 2.46848  | 3.21195  | No change |
| NM_198424    | Orai3         | 0.0623663 | 1 | 0.381666 | 6.98326  | 8.66815  | No change |
| NM_001146119 | Fam49a        | 0.062406  | 1 | 0.605708 | 0.919509 | 1.33809  | No change |
| NM_020611    | Srd5a3        | 0.0625129 | 1 | 0.524923 | 3.54571  | 4.86994  | No change |
| NM_028002    | Dus4l         | 0.0628369 | 1 | 0.630913 | 2.24689  | 3.32967  | No change |
| NM_026124    | 1110008F13Rik | 0.0629988 | 1 | 0.340045 | 17.921   | 21.6057  | No change |
| NM_153152    | 2410015M20Rik | 0.0630016 | 1 | 0.182852 | 141.232  | 152.615  | No change |
| NM_007572    | C1qa          | 0.0631176 | 1 | 0.304996 | 23.1236  | 27.2036  | No change |
| NM_172119    | Dio3          | 0.0632997 | 1 | 1.87939  | 0.149235 | 0.614912 | No change |
| NM_009800    | Car11         | 0.0637964 | 1 | 1.33625  | 0.532377 | 1.34608  | No change |
| NM_001024720 | Hmcn1         | 0.0638545 | 1 | 0.54617  | 0.312047 | 0.435121 | No change |
| NM_001166584 | Tead1         | 0.0640969 | 1 | 0.32798  | 2.09177  | 2.50065  | No change |
| NM_175374    | Mtrf1l        | 0.064182  | 1 | 0.566367 | 1.99427  | 2.82124  | No change |

|              |               |           |   |          |          |          |           |
|--------------|---------------|-----------|---|----------|----------|----------|-----------|
| NM_009321    | Tbca          | 0.0642205 | 1 | 0.343178 | 36.8555  | 44.5304  | No change |
| NM_007433    | Alplp2        | 0.0642502 | 1 | 0.528892 | 2.93687  | 4.04504  | No change |
| NM_001081088 | Lrp2          | 0.0643385 | 1 | 0.225981 | 3.7309   | 4.15419  | No change |
| NM_178384    | Zfp74         | 0.0647339 | 1 | 0.661343 | 0.957785 | 1.45091  | No change |
| NM_019505    | Dgke          | 0.0647455 | 1 | 0.303093 | 4.9513   | 5.81716  | No change |
| NM_001163497 | Cd160         | 0.065053  | 1 | 0.721537 | 1.16249  | 1.84005  | No change |
| NM_054042    | Cd248         | 0.065053  | 1 | 0.721537 | 1.1153   | 1.76535  | No change |
| NM_001109040 | Kif21a        | 0.0651717 | 1 | 0.216425 | 10.2716  | 11.3612  | No change |
| NM_001164574 | Kbtbd3        | 0.0651738 | 1 | 0.455471 | 3.90353  | 5.10362  | No change |
| NM_177565    | Zfp3          | 0.0653597 | 1 | 0.612308 | 2.36895  | 3.4636   | No change |
| NM_033174    | Snurf         | 0.0654597 | 1 | 0.399055 | 6.43864  | 8.09015  | No change |
| NM_009546    | Trim25        | 0.0656301 | 1 | 0.33921  | 3.47024  | 4.18125  | No change |
| NM_172926    | Snx14         | 0.0656549 | 1 | 0.226416 | 18.7445  | 20.8775  | No change |
| NM_001039951 | Zfp606        | 0.0660296 | 1 | 0.532939 | 2.64125  | 3.64829  | No change |
| NM_008222    | Hccs          | 0.0661585 | 1 | 0.471116 | 3.51098  | 4.6414   | No change |
| NM_025877    | Slc25a23      | 0.0662259 | 1 | 0.340721 | 5.70064  | 6.87588  | No change |
| NM_146253    | Zbtb6         | 0.0663339 | 1 | 0.289816 | 6.50058  | 7.56694  | No change |
| NM_145514    | Wdr26         | 0.0664328 | 1 | 0.174998 | 18.4938  | 19.8757  | No change |
| NM_145147    | Gtpbp6        | 0.0664847 | 1 | 0.571537 | 3.19336  | 4.53417  | No change |
| NM_020507    | Tob2          | 0.0666283 | 1 | 0.382742 | 3.55968  | 4.42178  | No change |
| NM_030253    | Parp9         | 0.0666716 | 1 | 0.423024 | 3.10358  | 3.9659   | No change |
| NM_013771    | Yme11         | 0.0666814 | 1 | 0.206479 | 17.0001  | 18.6741  | No change |
| NM_008679    | Ncoa3         | 0.0671147 | 1 | 0.239552 | 6.7      | 7.53085  | No change |
| NM_030710    | Slamf6        | 0.067147  | 1 | 0.797381 | 0.912883 | 1.52809  | No change |
| NM_009804    | Cat           | 0.0671562 | 1 | 0.309519 | 9.75319  | 11.5102  | No change |
| NM_146216    | Vac14         | 0.0672988 | 1 | 0.473751 | 2.73621  | 3.62389  | No change |
| NM_001033466 | Zbtb2         | 0.067504  | 1 | 0.448274 | 2.95876  | 3.84873  | No change |
| NM_175657    | Hist1h4n      | 0.0675476 | 1 | 0.310547 | 79.2981  | 93.6504  | No change |
| NM_001195086 | Ppfa1         | 0.0677267 | 1 | 0.221784 | 12.0992  | 13.4327  | No change |
| NM_026057    | Zfp422        | 0.0678482 | 1 | 0.415024 | 3.67732  | 4.67265  | No change |
| NM_172592    | Srek1         | 0.067864  | 1 | 0.196438 | 22.6935  | 24.7549  | No change |
| NM_027297    | Prpf4         | 0.0678961 | 1 | 0.330777 | 4.00565  | 4.79795  | No change |
| NM_001033174 | Osbp          | 0.0680069 | 1 | 0.211657 | 16.014   | 17.6543  | No change |
| NM_029280    | Mettl5        | 0.0681545 | 1 | 0.395748 | 13.7208  | 17.1999  | No change |
| NM_010906    | Nfix          | 0.0681742 | 1 | 0.426564 | 4.15283  | 5.31988  | No change |
| NM_133673    | Tor1b         | 0.0682262 | 1 | 0.269412 | 12.2317  | 14.0372  | No change |
| NM_021435    | Slc35b4       | 0.0683487 | 1 | 0.251769 | 12.0082  | 13.6125  | No change |
| NM_007960    | Etv1          | 0.0683498 | 1 | 0.378012 | 3.59346  | 4.44892  | No change |
| NM_027919    | Tha1          | 0.0684153 | 1 | 0.61909  | 2.31047  | 3.39446  | No change |
| NM_008733    | Nrap          | 0.068656  | 1 | 0.939825 | 0.266197 | 0.496191 | No change |
| NM_020283    | B3galt1       | 0.068656  | 1 | 0.939825 | 0.294004 | 0.548023 | No change |
| NM_001101483 | Tmem22        | 0.0688509 | 1 | 0.576827 | 3.20983  | 4.57469  | No change |
| NM_001205336 | Arap3         | 0.0688509 | 1 | 0.576827 | 0.937804 | 1.33657  | No change |
| NM_019805    | Anapc7        | 0.0688832 | 1 | 0.354863 | 6.38641  | 7.77953  | No change |
| NM_177140    | D230037D09Rik | 0.0693446 | 1 | 0.507519 | 5.84148  | 7.92382  | No change |
| NM_011239    | Ranbp1        | 0.0695828 | 1 | 0.264069 | 46.1348  | 52.7478  | No change |
| NM_027264    | Zfp715        | 0.0696663 | 1 | 0.278196 | 8.11698  | 9.37223  | No change |
| NM_010744    | Tmed1         | 0.0697752 | 1 | 0.38144  | 9.84231  | 12.2146  | No change |
| NM_010491    | Iapp          | 0.0698163 | 1 | 0.64635  | 5.51527  | 8.26371  | No change |
| NM_027835    | Ifih1         | 0.0698819 | 1 | 0.39985  | 2.34877  | 2.95281  | No change |
| NM_178114    | Amigo2        | 0.0700635 | 1 | 0.373651 | 4.81389  | 5.94163  | No change |
| NM_007858    | Diap1         | 0.0700782 | 1 | 0.248631 | 10.7159  | 12.121   | No change |
| NM_008976    | Ptpn14        | 0.0701071 | 1 | 0.365638 | 1.52437  | 1.87095  | No change |
| NM_019749    | Gabarap       | 0.0704937 | 1 | 0.167574 | 145.659  | 155.739  | No change |
| NM_013716    | G3bp1         | 0.0707584 | 1 | 0.254664 | 16.4304  | 18.663   | No change |
| NM_011104    | Prkce         | 0.0708558 | 1 | 0.510926 | 1.11437  | 1.51526  | No change |
| NM_029001    | Elovl7        | 0.070984  | 1 | 0.602354 | 0.846006 | 1.22799  | No change |
| NM_176785    | Hps6          | 0.070984  | 1 | 0.602354 | 1.70613  | 2.47647  | No change |
| NM_028262    | Setd3         | 0.0710084 | 1 | 0.189899 | 39.6674  | 43.0746  | No change |
| NM_153547    | Gnl3          | 0.0712107 | 1 | 0.277663 | 18.422   | 21.2629  | No change |
| NM_178611    | Lair1         | 0.0712928 | 1 | 0.582242 | 1.57696  | 2.25616  | No change |
| NM_026555    | Rcn3          | 0.0713955 | 1 | 0.423338 | 7.77031  | 9.93117  | No change |
| NM_019745    | Pdcd10        | 0.0715798 | 1 | 0.320876 | 12.5224  | 14.8957  | No change |
| NM_028446    | Trip11        | 0.0718547 | 1 | 0.184284 | 18.7851  | 20.3193  | No change |
| NM_212484    | Cnot6         | 0.0718975 | 1 | 0.257912 | 17.2212  | 19.6055  | No change |
| NM_026242    | Mrfap1        | 0.0719175 | 1 | 0.174453 | 89.6602  | 96.3232  | No change |
| NM_173010    | Ube3a         | 0.0720952 | 1 | 0.219228 | 17.961   | 19.905   | No change |
| NM_001163704 | Fbxo6         | 0.0721552 | 1 | 0.328449 | 15.4602  | 18.4878  | No change |
| NM_029466    | Arl5b         | 0.0724294 | 1 | 0.396585 | 3.74255  | 4.69418  | No change |
| NM_011049    | Cdk16         | 0.0725656 | 1 | 0.272327 | 12.2112  | 14.042   | No change |
| NM_147153    | Vps39         | 0.0726827 | 1 | 0.24484  | 11.5359  | 13.0142  | No change |
| NM_133808    | Hdlbp         | 0.0726869 | 1 | 0.122163 | 102.517  | 106.213  | No change |
| NM_011116    | Pld3          | 0.0728526 | 1 | 0.209432 | 37.5839  | 41.3694  | No change |
| NM_007737    | Col5a2        | 0.0729732 | 1 | 0.437692 | 1.58034  | 2.04032  | No change |
| NM_011278    | Rnf4          | 0.0731343 | 1 | 0.201638 | 31.3808  | 34.355   | No change |
| NM_007395    | Acvr1b        | 0.0736346 | 1 | 0.314449 | 7.67749  | 9.09162  | No change |

|              |               |           |   |          |          |          |           |
|--------------|---------------|-----------|---|----------|----------|----------|-----------|
| NM_026490    | Mrpl19        | 0.0737683 | 1 | 0.38247  | 2.98525  | 3.70738  | No change |
| NM_144801    | Tmem143       | 0.0738108 | 1 | 0.587786 | 2.28133  | 3.27677  | No change |
| NM_022022    | Ube4b         | 0.0738146 | 1 | 0.251745 | 8.56611  | 9.71029  | No change |
| NM_008875    | Pld1          | 0.073838  | 1 | 0.60862  | 0.9185   | 1.33917  | No change |
| NM_212468    | Ssbp1         | 0.073838  | 1 | 0.60862  | 3.10702  | 4.53002  | No change |
| NM_145554    | Ldlrap1       | 0.0739811 | 1 | 0.517921 | 2.55706  | 3.49413  | No change |
| NM_001081222 | Esco1         | 0.0740369 | 1 | 0.225451 | 14.4912  | 16.1292  | No change |
| NM_029614    | Prss23        | 0.0741237 | 1 | 0.280874 | 10.7153  | 12.3954  | No change |
| NM_028029    | Dnmbp         | 0.0741557 | 1 | 0.290121 | 6.4668   | 7.52908  | No change |
| NM_175229    | Srrm2         | 0.0742531 | 1 | 0.144562 | 36.5321  | 38.4416  | No change |
| NM_175329    | Chchd10       | 0.0743879 | 1 | 0.452177 | 10.2187  | 13.3283  | No change |
| NM_019492    | Rgs3          | 0.0745126 | 1 | 0.334245 | 4.56323  | 5.47895  | No change |
| NM_001081061 | Bdp1          | 0.0746249 | 1 | 0.215406 | 7.69917  | 8.50985  | No change |
| NM_019403    | Rnf5          | 0.0746751 | 1 | 0.441581 | 9.36835  | 12.1282  | No change |
| NM_133826    | Atp6v1h       | 0.0747368 | 1 | 0.322849 | 11.9564  | 14.2419  | No change |
| NM_025541    | Asf1a         | 0.0755586 | 1 | 0.349626 | 8.78348  | 10.6601  | No change |
| NM_145079    | Ugt1a6a       | 0.0759995 | 1 | 0.219788 | 22.1405  | 24.5463  | No change |
| NM_001171005 | Prkd3         | 0.0761434 | 1 | 0.286111 | 6.58127  | 7.64094  | No change |
| NM_145958    | Kbtbd2        | 0.0763449 | 1 | 0.291095 | 8.25216  | 9.6142   | No change |
| NM_009515    | Was           | 0.0764094 | 1 | 0.593464 | 2.32975  | 3.35984  | No change |
| NM_001134384 | Iqsec1        | 0.0766886 | 1 | 0.256077 | 7.14111  | 8.11935  | No change |
| NM_145577    | Zfp772        | 0.0768023 | 1 | 0.574989 | 1.91077  | 2.71936  | No change |
| NM_026275    | Ube2r2        | 0.0770836 | 1 | 0.288507 | 9.95313  | 11.575   | No change |
| NM_011099    | Pkm2          | 0.0771552 | 1 | 0.159951 | 102.791  | 109.324  | No change |
| NM_025441    | Nemf          | 0.0771677 | 1 | 0.195598 | 29.2891  | 31.9307  | No change |
| NM_001081320 | Cyb561d1      | 0.0771745 | 1 | 0.407586 | 3.0764   | 3.88846  | No change |
| NR_002860    | A130040M12Rik | 0.0772977 | 1 | 0.257723 | 14.2111  | 16.1764  | No change |
| NM_001168292 | R3hdm2        | 0.0777005 | 1 | 0.400012 | 3.37224  | 4.23976  | No change |
| NM_013872    | Pmm1          | 0.0778034 | 1 | 0.409022 | 10.3499  | 13.095   | No change |
| NM_173748    | Nudcd3        | 0.0778279 | 1 | 0.24584  | 13.3863  | 15.112   | No change |
| NM_007872    | Dnmt3a        | 0.0780661 | 1 | 0.304739 | 2.92803  | 3.4439   | No change |
| NM_025338    | Aurkaip1      | 0.0780732 | 1 | 0.282517 | 44.5578  | 51.6026  | No change |
| NM_172255    | Wdr11         | 0.0782093 | 1 | 0.267307 | 9.12901  | 10.461   | No change |
| NM_009777    | C1qb          | 0.0782395 | 1 | 0.343193 | 19.3774  | 23.4116  | No change |
| NM_172291    | Foxred1       | 0.0782659 | 1 | 0.27501  | 17.6809  | 20.3695  | No change |
| NM_019742    | Tusc2         | 0.0782942 | 1 | 0.356105 | 11.2029  | 13.658   | No change |
| NM_146175    | Zfp282        | 0.0785232 | 1 | 0.485824 | 1.57513  | 2.10382  | No change |
| NM_153543    | Aldh1l2       | 0.0788809 | 1 | 0.720512 | 0.496981 | 0.785772 | No change |
| NM_026825    | Lrrc16a       | 0.079279  | 1 | 0.221734 | 14.4304  | 16.02    | No change |
| NR_027905    | LOC106740     | 0.0793185 | 1 | 0.514817 | 6.53371  | 8.90789  | No change |
| NM_001164709 | Synn1         | 0.0794886 | 1 | 0.33432  | 7.18715  | 8.62972  | No change |
| NM_026129    | Erp29         | 0.0798697 | 1 | 0.206964 | 75.6362  | 83.1112  | No change |
| NM_025846    | Rras2         | 0.0798934 | 1 | 0.309202 | 12.2231  | 14.4213  | No change |
| NM_007929    | Emp2          | 0.0799623 | 1 | 0.381139 | 4.5584   | 5.65563  | No change |
| NM_025918    | Ccdc43        | 0.0799623 | 1 | 0.381139 | 6.7971   | 8.43318  | No change |
| NM_026688    | Ndufs3        | 0.0800295 | 1 | 0.300268 | 32.1774  | 37.7284  | No change |
| NM_008957    | Ptch1         | 0.0800982 | 1 | 0.347574 | 4.67857  | 5.6699   | No change |
| NM_146229    | Dync1li1      | 0.080119  | 1 | 0.453829 | 4.86309  | 6.35006  | No change |
| NM_001076681 | 1810012P15Rik | 0.0805001 | 1 | 0.249955 | 10.3029  | 11.6644  | No change |
| NM_010567    | Inpp1         | 0.0806457 | 1 | 0.269974 | 8.29279  | 9.52036  | No change |
| NM_025542    | 2410001C21Rik | 0.0806585 | 1 | 0.311047 | 12.8519  | 15.1827  | No change |
| NM_011935    | Esrrg         | 0.0806821 | 1 | 0.532684 | 1.24546  | 1.71971  | No change |
| NM_178775    | Rps6kc1       | 0.0807378 | 1 | 0.343056 | 5.25096  | 6.34348  | No change |
| NM_057172    | Fubp1         | 0.0808236 | 1 | 0.221333 | 11.7891  | 13.0841  | No change |
| NM_001111065 | Reps1         | 0.0808554 | 1 | 0.337551 | 8.65324  | 10.4135  | No change |
| NM_010303    | Gna13         | 0.0808805 | 1 | 0.234024 | 10.3465  | 11.5848  | No change |
| NM_001177402 | 1110001A16Rik | 0.0810772 | 1 | 0.455961 | 7.3061   | 9.55434  | No change |
| NM_198886    | Zbtb12        | 0.0813541 | 1 | 0.671337 | 1.97495  | 3.01248  | No change |
| NM_028976    | Gorasp1       | 0.0814168 | 1 | 0.238153 | 17.5483  | 19.7049  | No change |
| NM_001163514 | Extl2         | 0.0817499 | 1 | 0.318504 | 9.22152  | 10.9507  | No change |
| NM_007825    | Cyp7b1        | 0.0819819 | 1 | 0.791927 | 1.09398  | 1.82295  | No change |
| NM_144557    | Myrip         | 0.082117  | 1 | 0.969465 | 0.292704 | 0.557805 | No change |
| NM_172674    | Phf20         | 0.0822573 | 1 | 0.285022 | 6.26057  | 7.263    | No change |
| NM_029607    | 2310003C23Rik | 0.0825735 | 1 | 0.341556 | 11.6406  | 14.0477  | No change |
| NM_025511    | Fam36a        | 0.082796  | 1 | 0.36652  | 39.669   | 48.7153  | No change |
| NM_033325    | Loxl2         | 0.0829938 | 1 | 0.628428 | 0.834163 | 1.23347  | No change |
| NM_133949    | Ptov1         | 0.0831121 | 1 | 0.279694 | 20.3194  | 23.4855  | No change |
| NR_030494    | Mir715        | 0.0833222 | 1 | 0.396409 | 131.149  | 164.467  | No change |
| NM_001164048 | Mb            | 0.0833561 | 1 | 0.832084 | 2.15991  | 3.70821  | No change |
| NM_025461    | Cox16         | 0.08341   | 1 | 0.327413 | 12.2146  | 14.5955  | No change |
| NM_001111311 | Lrrfip1       | 0.083472  | 1 | 0.484223 | 2.32183  | 3.09748  | No change |
| NM_007926    | Aimp1         | 0.0834906 | 1 | 0.246336 | 50.3131  | 56.8185  | No change |
| NM_008210    | H3f3a         | 0.0835198 | 1 | 0.163814 | 222.357  | 237.124  | No change |
| NM_134007    | Cisd1         | 0.0840244 | 1 | 0.297162 | 33.5104  | 39.2061  | No change |
| NM_027360    | 2010107E04Rik | 0.08419   | 1 | 0.245479 | 157.716  | 178.002  | No change |
| NM_023220    | 2010106G01Rik | 0.084229  | 1 | 0.237936 | 11.3257  | 12.7156  | No change |

|              |               |           |   |          |          |          |           |
|--------------|---------------|-----------|---|----------|----------|----------|-----------|
| NM_007508    | Atp6v1a       | 0.0842389 | 1 | 0.180969 | 41.5226  | 44.8102  | No change |
| NM_175279    | Rassf10       | 0.0842661 | 1 | 0.731984 | 0.837033 | 1.3344   | No change |
| NM_001167768 | 1110057K04Rik | 0.0846993 | 1 | 0.611354 | 3.92059  | 5.7264   | No change |
| NM_172424    | Med13l        | 0.084993  | 1 | 0.295494 | 3.569    | 4.17075  | No change |
| NM_009224    | Snmp70        | 0.0850044 | 1 | 0.212035 | 57.3191  | 63.2058  | No change |
| NM_010724    | Psmb8         | 0.0850513 | 1 | 0.557955 | 4.84374  | 6.80928  | No change |
| NM_028069    | Cdhr5         | 0.0850769 | 1 | 0.464762 | 4.4554   | 5.86254  | No change |
| NM_172937    | Shprh         | 0.0852343 | 1 | 0.277893 | 5.40021  | 6.23381  | No change |
| NM_001104646 | AW209491      | 0.0852839 | 1 | 0.425799 | 6.20529  | 7.94393  | No change |
| NM_025521    | 2310011J03Rik | 0.0853377 | 1 | 0.365834 | 10.9644  | 13.4581  | No change |
| NM_007795    | Ctf1          | 0.0854614 | 1 | 0.656004 | 2.90171  | 4.37685  | No change |
| NM_001081413 | Unc13b        | 0.0855525 | 1 | 0.254316 | 8.22232  | 9.33711  | No change |
| NM_001004150 | A4galt        | 0.0857904 | 1 | 0.528892 | 3.26477  | 4.49551  | No change |
| NM_019676    | Plcd1         | 0.0858521 | 1 | 0.418334 | 4.78646  | 6.09546  | No change |
| NM_001193271 | Meis1         | 0.0858717 | 1 | 0.477667 | 2.59247  | 3.44246  | No change |
| NM_001081181 | 9430016H08Rik | 0.0862555 | 1 | 0.635392 | 3.20851  | 4.768    | No change |
| NM_175638    | Wnk4          | 0.0862555 | 1 | 0.635392 | 1.0249   | 1.52305  | No change |
| NM_026554    | Ncbp2         | 0.0863787 | 1 | 0.298773 | 15.9777  | 18.7143  | No change |
| NM_013678    | Surf2         | 0.0865335 | 1 | 0.395953 | 13.0061  | 16.3046  | No change |
| NM_026252    | Cpeb4         | 0.0866959 | 1 | 0.299517 | 14.017   | 16.4262  | No change |
| NM_025408    | Acer3         | 0.0867104 | 1 | 0.335027 | 5.78771  | 6.95265  | No change |
| NM_009744    | Bcl6          | 0.0868093 | 1 | 0.709013 | 0.975913 | 1.52979  | No change |
| NM_177240    | D030016E14Rik | 0.086844  | 1 | 0.231038 | 16.754   | 18.7201  | No change |
| NM_173007    | Tspan12       | 0.087394  | 1 | 0.376889 | 6.82935  | 8.44769  | No change |
| NM_001167799 | Stx5a         | 0.0875918 | 1 | 0.277006 | 22.7569  | 26.2534  | No change |
| NM_007802    | Ctsk          | 0.0877523 | 1 | 0.882529 | 1.22268  | 2.17989  | No change |
| NM_175549    | Robo2         | 0.0877523 | 1 | 0.882529 | 0.225179 | 0.401466 | No change |
| NM_017372    | Lyz2          | 0.0879005 | 1 | 0.271554 | 41.6048  | 47.8154  | No change |
| NM_019583    | Il17rb        | 0.0879269 | 1 | 0.406637 | 6.72921  | 8.49927  | No change |
| NM_001205371 | Casc4         | 0.0880098 | 1 | 0.252516 | 14.5561  | 16.5089  | No change |
| NM_010907    | Nfkbia        | 0.0880625 | 1 | 0.338103 | 14.6536  | 17.6408  | No change |
| NM_145954    | Aldh16a1      | 0.0881855 | 1 | 0.399609 | 5.67426  | 7.13155  | No change |
| NM_007714    | Clk4          | 0.0882199 | 1 | 0.291929 | 18.7493  | 21.856   | No change |
| NM_001168658 | Ccdc127       | 0.0885795 | 1 | 0.461778 | 1.71693  | 2.25437  | No change |
| NM_001081256 | Kdm3b         | 0.0887219 | 1 | 0.270547 | 6.31078  | 7.24774  | No change |
| NM_183034    | Plekhm1       | 0.0887525 | 1 | 0.400849 | 2.82686  | 3.55595  | No change |
| NM_175381    | 2700081O15Rik | 0.0890612 | 1 | 0.52194  | 1.43884  | 1.97141  | No change |
| NM_026737    | Phf5a         | 0.0890722 | 1 | 0.362056 | 11.6719  | 14.2885  | No change |
| NM_133667    | Pdk2          | 0.0891587 | 1 | 0.223246 | 37.11    | 41.2409  | No change |
| NM_008841    | Pik3r2        | 0.0891813 | 1 | 0.340626 | 7.23624  | 8.72673  | No change |
| NM_207237    | Man1c1        | 0.0892642 | 1 | 0.664052 | 0.812961 | 1.23331  | No change |
| NM_001162883 | Apol9a        | 0.089404  | 1 | 1.46178  | 0.472494 | 1.31414  | No change |
| NR_038011    | C730036E19Rik | 0.089404  | 1 | 1.46178  | 0.263988 | 0.734226 | No change |
| NM_026382    | Snmp48        | 0.0894342 | 1 | 0.602141 | 2.7659   | 4.01291  | No change |
| NM_020006    | Cdc42ep4      | 0.0898499 | 1 | 0.223219 | 26.1429  | 29.0525  | No change |
| NM_026856    | Zfp644        | 0.0898677 | 1 | 0.188269 | 27.7547  | 30.1043  | No change |
| NM_001080548 | Usp6nl        | 0.0898891 | 1 | 0.306903 | 6.44342  | 7.58984  | No change |
| NM_009306    | Syt1          | 0.089919  | 1 | 0.743905 | 0.756729 | 1.2168   | No change |
| NM_010018    | Dao           | 0.089919  | 1 | 0.743905 | 1.66905  | 2.68377  | No change |
| NM_021448    | Elp2          | 0.0899752 | 1 | 0.337459 | 8.4711   | 10.1933  | No change |
| NM_001030307 | Dkc1          | 0.0900044 | 1 | 0.552739 | 2.21287  | 3.09908  | No change |
| NM_021880    | Prkar1a       | 0.0901957 | 1 | 0.222346 | 26.0274  | 28.9065  | No change |
| NM_001169131 | Papd7         | 0.0905866 | 1 | 0.383944 | 4.13551  | 5.14077  | No change |
| NM_011995    | Pclo          | 0.0906797 | 1 | 0.62405  | 0.225555 | 0.332432 | No change |
| NM_026579    | D10Wsu102e    | 0.0909525 | 1 | 0.29476  | 10.0895  | 11.7844  | No change |
| NM_015772    | Sall2         | 0.0909968 | 1 | 0.456929 | 2.04208  | 2.67209  | No change |
| NM_145392    | Bag2          | 0.0910293 | 1 | 0.413415 | 7.44927  | 9.45347  | No change |
| NM_198247    | Sertad4       | 0.0911888 | 1 | 0.500878 | 2.41613  | 3.26128  | No change |
| NM_197979    | Uqcr10        | 0.0916532 | 1 | 0.271775 | 103.67   | 119.163  | No change |
| NM_030013    | Cyp20a1       | 0.0918296 | 1 | 0.719576 | 2.0894   | 3.30018  | No change |
| NM_001013012 | Zfp787        | 0.0918791 | 1 | 0.423183 | 6.71607  | 8.58165  | No change |
| NM_172650    | Kctd3         | 0.091945  | 1 | 0.315489 | 7.88586  | 9.34465  | No change |
| NM_001195075 | Kihl3         | 0.0920078 | 1 | 0.556985 | 2.8632   | 4.0219   | No change |
| NM_028031    | Zdhhc13       | 0.0920078 | 1 | 0.556985 | 2.54798  | 3.57911  | No change |
| NM_027342    | Fam162a       | 0.0930588 | 1 | 0.349233 | 34.5721  | 41.944   | No change |
| NM_001159563 | Orc3          | 0.093091  | 1 | 0.252919 | 9.26662  | 10.5127  | No change |
| NR_027770    | Deaf1         | 0.0931136 | 1 | 0.442803 | 5.60708  | 7.26414  | No change |
| NM_001162980 | 1700024P16Rik | 0.0931189 | 1 | 0.376889 | 5.64477  | 6.98222  | No change |
| NM_001197024 | Unkl          | 0.0934639 | 1 | 0.383799 | 3.53208  | 4.39015  | No change |
| NM_183021    | Thada         | 0.0935701 | 1 | 0.215155 | 12.9747  | 14.3382  | No change |
| NM_011159    | Prkdc         | 0.0937213 | 1 | 0.308074 | 2.51299  | 2.9625   | No change |
| NM_053201    | Magee1        | 0.0937742 | 1 | 0.576482 | 1.60555  | 2.28686  | No change |
| NM_025498    | Psenen        | 0.0938019 | 1 | 0.355969 | 32.166   | 39.2089  | No change |
| NM_027857    | Acy3          | 0.0938173 | 1 | 0.630646 | 2.96763  | 4.39439  | No change |
| NM_001014973 | Snx13         | 0.0946338 | 1 | 0.263358 | 8.39539  | 9.59365  | No change |
| NM_011244    | Rarg          | 0.0949312 | 1 | 0.465327 | 3.44045  | 4.52847  | No change |

|              |               |           |   |          |          |         |           |
|--------------|---------------|-----------|---|----------|----------|---------|-----------|
| NM_030565    | Fam20c        | 0.0950354 | 1 | 0.613928 | 1.6024   | 2.34439 | No change |
| NM_173754    | Usp43         | 0.0950354 | 1 | 0.613928 | 1.07773  | 1.57676 | No change |
| NM_017478    | Copg2         | 0.0953754 | 1 | 0.202069 | 42.7747  | 46.8422 | No change |
| NM_016681    | Chek2         | 0.0958534 | 1 | 0.756303 | 1.24064  | 2.01283 | No change |
| NM_133211    | Tlr7          | 0.0958534 | 1 | 0.756303 | 0.744185 | 1.20738 | No change |
| NM_026195    | Atic          | 0.0958957 | 1 | 0.409053 | 5.49856  | 6.95638 | No change |
| NM_010015    | Dad1          | 0.0962692 | 1 | 0.2719   | 13.716   | 15.767  | No change |
| NM_027823    | Arhgap42      | 0.0964286 | 1 | 0.37243  | 3.46917  | 4.2777  | No change |
| NM_001098840 | Gm13277       | 0.0964664 | 1 | 1.00138  | 0.905722 | 1.76777 | No change |
| NM_001165929 | Ccdc78        | 0.0967644 | 1 | 0.657477 | 2.44833  | 3.69608 | No change |
| NM_134006    | Rdh5          | 0.0969157 | 1 | 0.947845 | 1.21686  | 2.27908 | No change |
| NM_001004062 | Crtc1         | 0.0971199 | 1 | 0.479983 | 1.6459   | 2.1889  | No change |
| NM_026079    | Ikbkap        | 0.0971895 | 1 | 0.26683  | 8.38352  | 9.60321 | No change |
| NM_153056    | Sirt7         | 0.0976375 | 1 | 0.405811 | 8.65574  | 10.9256 | No change |
| NM_001130444 | Hras1         | 0.0980529 | 1 | 0.325036 | 12.4233  | 14.8195 | No change |
| NM_181409    | Mtmr11        | 0.0982687 | 1 | 0.482394 | 3.29629  | 4.3912  | No change |
| NM_147201    | Nrbp1         | 0.0983107 | 1 | 0.333511 | 12.2166  | 14.6594 | No change |
| NM_001162945 | Mtx3          | 0.0983978 | 1 | 0.308005 | 5.30888  | 6.25811 | No change |
| NM_021457    | Fzd1          | 0.0985868 | 1 | 0.528892 | 1.65557  | 2.27934 | No change |
| NM_175276    | Fhod3         | 0.0985868 | 1 | 0.528892 | 1.34     | 1.84488 | No change |
| NM_008445    | Kif3c         | 0.0987366 | 1 | 0.330407 | 3.94815  | 4.72737 | No change |
| NM_008305    | Hspg2         | 0.0987862 | 1 | 0.401588 | 1.08642  | 1.36725 | No change |
| NM_144522    | Tbc1d10b      | 0.0989458 | 1 | 0.3778   | 5.07314  | 6.27898 | No change |
| NM_010073    | Dpm2          | 0.0990047 | 1 | 0.415645 | 16.2698  | 20.6785 | No change |
| NM_001177602 | Ak4           | 0.099187  | 1 | 0.327483 | 5.4278   | 6.48579 | No change |
| NM_010597    | Kcnab1        | 0.0993026 | 1 | 0.604841 | 1.70381  | 2.47638 | No change |
| NM_027375    | Gcc2          | 0.0993356 | 1 | 0.233192 | 12.8982  | 14.4332 | No change |
| NM_008249    | Tfb2m         | 0.0993977 | 1 | 0.42371  | 5.43764  | 6.95035 | No change |
| NM_026144    | Dhdds         | 0.0994373 | 1 | 0.317045 | 9.90491  | 11.7497 | No change |
| NM_031201    | Tsta3         | 0.099639  | 1 | 0.292487 | 30.1719  | 35.1841 | No change |
| NM_001025067 | Lrig2         | 0.0998601 | 1 | 0.259971 | 8.17265  | 9.31708 | No change |
| NM_001178012 | Sfxn3         | 0.099911  | 1 | 0.403957 | 5.3236   | 6.71084 | No change |
| NM_009296    | Supt4h1       | 0.100213  | 1 | 0.457809 | 15.5879  | 20.4081 | No change |
| NM_001114660 | Scfd2         | 0.100251  | 1 | 0.38057  | 4.93469  | 6.11944 | No change |
| NM_027357    | Psmc1         | 0.100426  | 1 | 0.276305 | 14.7049  | 16.9555 | No change |
| NM_028152    | Mms19         | 0.100504  | 1 | 0.267554 | 13.4289  | 15.3902 | No change |
| NM_007840    | Ddx5          | 0.100536  | 1 | 0.144683 | 226.403  | 238.256 | No change |
| NM_025313    | Atp5d         | 0.100623  | 1 | 0.300351 | 39.5251  | 46.3441 | No change |
| NM_001177760 | Trnfaip8      | 0.100992  | 1 | 0.626305 | 1.87753  | 2.77118 | No change |
| NM_029096    | 1110008J03Rik | 0.100992  | 1 | 0.626305 | 2.97226  | 4.38697 | No change |
| NM_001080387 | Srsf10        | 0.101112  | 1 | 0.235747 | 30.5356  | 34.2302 | No change |
| NM_027872    | Slc46a3       | 0.101152  | 1 | 0.547365 | 2.76354  | 3.85495 | No change |
| NM_144833    | Zfp410        | 0.101162  | 1 | 0.371746 | 8.41122  | 10.3664 | No change |
| NM_152810    | Cdc5l         | 0.101212  | 1 | 0.264953 | 18.5475  | 21.2181 | No change |
| NM_019767    | Arpc1a        | 0.101263  | 1 | 0.293244 | 25.1474  | 29.3403 | No change |
| NM_001170433 | Ppfbp1        | 0.101273  | 1 | 0.304727 | 7.26236  | 8.54128 | No change |
| NM_207670    | Gripap1       | 0.101394  | 1 | 0.52232  | 2.59977  | 3.56252 | No change |
| NM_010043    | Des           | 0.101402  | 1 | 0.451627 | 5.25373  | 6.84837 | No change |
| NM_133968    | Snopc2        | 0.101402  | 1 | 0.451627 | 7.45724  | 9.72071 | No change |
| NM_023239    | Ndnf2         | 0.101474  | 1 | 0.357679 | 15.7323  | 19.1993 | No change |
| NM_001036293 | Nrbf2         | 0.101509  | 1 | 0.428129 | 7.3238   | 9.39021 | No change |
| NM_025567    | Cyc1          | 0.101525  | 1 | 0.377783 | 15.643   | 19.3607 | No change |
| NM_175675    | 4930471M23Rik | 0.101712  | 1 | 0.34077  | 8.20848  | 9.89979 | No change |
| NM_177863    | Frem1         | 0.101769  | 1 | 0.345028 | 2.62088  | 3.17031 | No change |
| NM_001044384 | Timp1         | 0.101798  | 1 | 0.870584 | 2.19259  | 3.87187 | No change |
| NR_033599    | Gm6682        | 0.102151  | 1 | 0.228675 | 70.1081  | 78.2057 | No change |
| NM_172496    | Cobl          | 0.102711  | 1 | 0.564516 | 1.10407  | 1.55901 | No change |
| NM_030880    | Paccin3       | 0.102744  | 1 | 0.502257 | 4.57372  | 6.17889 | No change |
| NM_028043    | D1Bwg0212e    | 0.103424  | 1 | 0.411307 | 4.68875  | 5.94101 | No change |
| NM_025510    | 2310004I24Rik | 0.103587  | 1 | 0.483428 | 6.35271  | 8.46864 | No change |
| NM_001100591 | Rc3h2         | 0.103628  | 1 | 0.215321 | 13.5421  | 14.9668 | No change |
| NM_145391    | Tapbp1        | 0.10377   | 1 | 0.393613 | 8.13589  | 10.1816 | No change |
| NM_172538    | Vezt          | 0.103844  | 1 | 0.313261 | 7.43765  | 8.79956 | No change |
| NM_011796    | Capn10        | 0.103852  | 1 | 0.319664 | 10.8767  | 12.9259 | No change |
| NM_153145    | Abca8a        | 0.104154  | 1 | 0.383275 | 3.25134  | 4.03952 | No change |
| NM_010878    | Nck1          | 0.104275  | 1 | 0.273604 | 30.6897  | 35.3203 | No change |
| NM_007567    | Bsn           | 0.104276  | 1 | 0.394664 | 1.0539   | 1.31987 | No change |
| NM_016804    | Mtx2          | 0.104425  | 1 | 0.373499 | 15.6781  | 19.3459 | No change |
| NM_001195632 | Arhgap32      | 0.105123  | 1 | 0.277497 | 4.6864   | 5.40812 | No change |
| NR_030423    | Mir671        | 0.105291  | 1 | 1.69882  | 4.97807  | 16.8489 | No change |
| NM_001085373 | Mcc           | 0.105472  | 1 | 0.507875 | 1.06429  | 1.44349 | No change |
| NM_183016    | Cdc42bpb      | 0.105565  | 1 | 0.248369 | 10.9239  | 12.3534 | No change |
| NM_011822    | Pigq          | 0.105634  | 1 | 0.302516 | 12.2708  | 14.4094 | No change |
| NM_001159513 | H2afy         | 0.105638  | 1 | 0.253085 | 35.0777  | 39.7984 | No change |
| NM_053161    | Mrp127        | 0.105783  | 1 | 0.429759 | 18.2347  | 23.4058 | No change |
| NM_001145813 | Elf5          | 0.105899  | 1 | 0.841775 | 1.01718  | 1.75759 | No change |

|              |               |          |   |          |          |          |           |
|--------------|---------------|----------|---|----------|----------|----------|-----------|
| NM_027270    | Exoc1         | 0.106087 | 1 | 0.34592  | 7.44273  | 9.00848  | No change |
| NM_001101603 | Gm8439        | 0.10612  | 1 | 1.16116  | 2.32864  | 5.14017  | No change |
| NM_009627    | Adm           | 0.10612  | 1 | 1.16116  | 0.706518 | 1.55954  | No change |
| NM_178682    | 4933426M11Rik | 0.106319 | 1 | 0.259372 | 12.7899  | 14.5746  | No change |
| NM_001161406 | Grhl1         | 0.106346 | 1 | 0.398946 | 4.76275  | 5.98258  | No change |
| NM_001165256 | Dcaf4         | 0.10646  | 1 | 0.479808 | 4.84551  | 6.44278  | No change |
| NM_013497    | Creb3         | 0.106917 | 1 | 0.329394 | 18.5466  | 22.1908  | No change |
| NM_008359    | Il17ra        | 0.106943 | 1 | 0.559266 | 1.63261  | 2.29659  | No change |
| NM_177658    | Ralgapb       | 0.107087 | 1 | 0.238141 | 10.4548  | 11.7392  | No change |
| NM_011014    | Sigmar1       | 0.107171 | 1 | 0.41904  | 9.06753  | 11.5515  | No change |
| NM_178619    | 1810026J23Rik | 0.107248 | 1 | 0.303211 | 12.1359  | 14.2578  | No change |
| NM_001085376 | Pappa2        | 0.107333 | 1 | 0.639316 | 0.527669 | 0.786063 | No change |
| NM_001199347 | Foxp3         | 0.10747  | 1 | 0.658851 | 1.09123  | 1.64864  | No change |
| NR_030719    | Gm8979        | 0.107525 | 1 | 0.440557 | 3.6702   | 4.74686  | No change |
| NM_148945    | Rps6ka3       | 0.107532 | 1 | 0.589193 | 2.53942  | 3.64929  | No change |
| NM_008034    | Folr1         | 0.107542 | 1 | 0.348928 | 19.2387  | 23.3349  | No change |
| NM_028876    | Tmed5         | 0.107713 | 1 | 0.318271 | 8.76968  | 10.4117  | No change |
| NM_025701    | Trappc5       | 0.107823 | 1 | 0.427013 | 6.75     | 8.64739  | No change |
| NM_080452    | Mrps2         | 0.107823 | 1 | 0.427013 | 6.6039   | 8.46022  | No change |
| NM_001037759 | Sgk3          | 0.107941 | 1 | 0.357877 | 4.26217  | 5.20205  | No change |
| NM_028136    | Dhx36         | 0.108052 | 1 | 0.233187 | 19.3179  | 21.6167  | No change |
| NM_031179    | Sf3b1         | 0.108063 | 1 | 0.166977 | 71.7076  | 76.6373  | No change |
| NM_134137    | Lars          | 0.108144 | 1 | 0.248127 | 20.0692  | 22.6917  | No change |
| NM_023059    | Sigirr        | 0.108186 | 1 | 0.474257 | 5.14817  | 6.81834  | No change |
| NM_001205101 | Gm13212       | 0.108196 | 1 | 0.502897 | 5.25113  | 7.09688  | No change |
| NM_133214    | BC017612      | 0.108302 | 1 | 0.513658 | 8.7024   | 11.8512  | No change |
| NM_001025373 | Zfp943        | 0.10846  | 1 | 0.346936 | 9.2788   | 11.2387  | No change |
| NM_001102458 | Azin1         | 0.108467 | 1 | 0.213537 | 27.3061  | 30.1414  | No change |
| NM_133780    | Tpr           | 0.108561 | 1 | 0.220414 | 16.0063  | 17.7528  | No change |
| NM_008702    | Nlk           | 0.108609 | 1 | 0.311432 | 7.90556  | 9.34113  | No change |
| NM_026452    | Coq9          | 0.108622 | 1 | 0.382145 | 11.2381  | 13.9511  | No change |
| NM_009439    | Psmc3         | 0.109062 | 1 | 0.383041 | 8.82929  | 10.9676  | No change |
| NM_001081020 | Adamts6       | 0.109203 | 1 | 0.577802 | 1.24297  | 1.7717   | No change |
| NM_145466    | A2ld1         | 0.109276 | 1 | 0.378588 | 18.2145  | 22.5553  | No change |
| NM_010411    | Hdac3         | 0.109355 | 1 | 0.259327 | 33.0564  | 37.6679  | No change |
| NM_027629    | Pgm2l1        | 0.109498 | 1 | 0.313256 | 4.0801   | 4.82712  | No change |
| NM_001033275 | Gxylt1        | 0.109621 | 1 | 0.361316 | 3.46651  | 4.2411   | No change |
| NM_026164    | Pnpla8        | 0.109671 | 1 | 0.242329 | 19.3539  | 21.7949  | No change |
| NM_001171052 | Mta3          | 0.109757 | 1 | 0.516614 | 3.05053  | 4.16296  | No change |
| NM_028428    | Fut11         | 0.109911 | 1 | 0.46912  | 3.1887   | 4.20784  | No change |
| NM_009305    | Syp           | 0.110522 | 1 | 0.976351 | 0.589666 | 1.12806  | No change |
| NM_001110231 | Celf2         | 0.110544 | 1 | 0.324073 | 3.51264  | 4.18721  | No change |
| NM_146011    | Arhgap9       | 0.110573 | 1 | 0.817462 | 1.30843  | 2.21993  | No change |
| NM_001163126 | Cog5          | 0.110618 | 1 | 0.367611 | 7.23207  | 8.88704  | No change |
| NM_023422    | Hist1h2bc     | 0.110629 | 1 | 0.263491 | 87.4991  | 99.9946  | No change |
| NM_009968    | Cryz          | 0.110765 | 1 | 0.447149 | 5.56027  | 7.22466  | No change |
| NM_175179    | Fam123b       | 0.110857 | 1 | 0.397027 | 2.04108  | 2.56033  | No change |
| NM_010811    | Ndst2         | 0.110991 | 1 | 0.319113 | 8.61574  | 10.2349  | No change |
| NM_009908    | Cmas          | 0.11102  | 1 | 0.402813 | 9.42439  | 11.87    | No change |
| NM_023179    | Atp6v1g2      | 0.111022 | 1 | 0.554427 | 4.52491  | 6.34298  | No change |
| NM_001129999 | Cep250        | 0.111035 | 1 | 0.285621 | 6.07051  | 7.04503  | No change |
| NR_015467    | 5530601H04Rik | 0.111182 | 1 | 0.666396 | 1.10179  | 1.67358  | No change |
| NM_001033420 | Dock1         | 0.111365 | 1 | 0.364854 | 3.27245  | 4.01355  | No change |
| NM_008095    | Gbas          | 0.111365 | 1 | 0.364854 | 10.63    | 13.0374  | No change |
| NM_207525    | Opa3          | 0.111429 | 1 | 0.48084  | 4.44061  | 5.90846  | No change |
| NM_001013770 | Lipo1         | 0.111468 | 1 | 0.322975 | 11.9613  | 14.2474  | No change |
| NM_133223    | Rac3          | 0.111508 | 1 | 1.03585  | 1.1637   | 2.33088  | No change |
| NM_025709    | Gapvd1        | 0.111835 | 1 | 0.22898  | 18.4567  | 20.5927  | No change |
| NM_027652    | Ept1          | 0.11192  | 1 | 0.302757 | 5.95103  | 6.98925  | No change |
| NM_011235    | Rad51l3       | 0.112211 | 1 | 0.347169 | 3.7013   | 4.48376  | No change |
| NM_145965    | Gphn          | 0.112241 | 1 | 0.389489 | 5.59655  | 6.9833   | No change |
| NM_172960    | Adck5         | 0.112241 | 1 | 0.491556 | 4.6599   | 6.2473   | No change |
| NM_011503    | Stxbp2        | 0.112429 | 1 | 0.380248 | 7.34831  | 9.10999  | No change |
| NM_011484    | Stam          | 0.112479 | 1 | 0.411428 | 4.27773  | 5.42039  | No change |
| NM_016710    | Hmgn5         | 0.112503 | 1 | 0.599282 | 2.88712  | 4.17871  | No change |
| NM_153484    | Tef           | 0.112771 | 1 | 0.281417 | 12.5249  | 14.4931  | No change |
| NM_153064    | Ndufs2        | 0.112884 | 1 | 0.232026 | 66.0477  | 73.8473  | No change |
| NM_144885    | BC005624      | 0.113027 | 1 | 0.376889 | 15.429   | 19.083   | No change |
| NM_172566    | Rundc1        | 0.113076 | 1 | 0.424642 | 4.48723  | 5.73881  | No change |
| NM_009216    | Sstr1         | 0.113247 | 1 | 1.76593  | 0.108079 | 0.389664 | No change |
| NM_177089    | Tacc1         | 0.113295 | 1 | 0.195355 | 29.444   | 32.0937  | No change |
| NM_026908    | Cab39l        | 0.113318 | 1 | 0.275444 | 18.5649  | 21.3931  | No change |
| NM_011305    | Rxra          | 0.113361 | 1 | 0.329763 | 5.88824  | 7.04688  | No change |
| NM_153422    | Pde5a         | 0.113447 | 1 | 0.503507 | 1.32591  | 1.79264  | No change |
| NM_172589    | Lhfpl2        | 0.113461 | 1 | 0.353321 | 5.75432  | 7.00078  | No change |
| NM_011829    | Impdh1        | 0.113701 | 1 | 0.514034 | 3.50201  | 4.77016  | No change |

|              |               |          |   |          |           |          |           |
|--------------|---------------|----------|---|----------|-----------|----------|-----------|
| NM_145969    | Fam116a       | 0.113807 | 1 | 0.587107 | 2.18115   | 3.12949  | No change |
| NM_172911    | D8Erttd82e    | 0.113807 | 1 | 0.587107 | 1.22473   | 1.75723  | No change |
| NM_007748    | Cox6a1        | 0.113842 | 1 | 0.253258 | 144.224   | 163.651  | No change |
| NM_001165949 | Pias3         | 0.113914 | 1 | 0.634687 | 1.61304   | 2.39466  | No change |
| NM_008255    | Hmgcr         | 0.113934 | 1 | 0.221708 | 29.385    | 32.6205  | No change |
| NM_008956    | Ptbp1         | 0.114022 | 1 | 0.248806 | 28.8536   | 32.6391  | No change |
| NM_001004156 | Plekhg5       | 0.114286 | 1 | 0.525753 | 1.93168   | 2.65311  | No change |
| NM_010839    | Mtcp1         | 0.114296 | 1 | 0.618647 | 5.25035   | 7.70512  | No change |
| NM_177919    | Tceal5        | 0.114377 | 1 | 0.765932 | 2.81241   | 4.59293  | No change |
| NM_153569    | Gak           | 0.114873 | 1 | 0.239821 | 21.5981   | 24.2796  | No change |
| NM_001114609 | Ino80d        | 0.114998 | 1 | 0.269232 | 4.61563   | 5.29584  | No change |
| NM_028730    | Pex26         | 0.115114 | 1 | 0.428728 | 3.47953   | 4.46278  | No change |
| NR_033554    | D330041H03Rik | 0.115193 | 1 | 0.441909 | 8.78206   | 11.3685  | No change |
| NM_145478    | Pim3          | 0.115454 | 1 | 0.435783 | 5.61807   | 7.24142  | No change |
| NM_183221    | Fat4          | 0.11567  | 1 | 0.317684 | 2.21969   | 2.63416  | No change |
| NM_001111121 | Ccdc6         | 0.115789 | 1 | 0.299291 | 7.91649   | 9.27512  | No change |
| NM_011729    | Ercc5         | 0.115845 | 1 | 0.40178  | 4.31019   | 5.4246   | No change |
| NM_010901    | Nfatc3        | 0.115913 | 1 | 0.275685 | 9.65318   | 11.1256  | No change |
| NM_009682    | Ap3s2         | 0.115949 | 1 | 0.365918 | 3.95055   | 4.84874  | No change |
| NM_009461    | Ubr1          | 0.116075 | 1 | 0.241219 | 12.3474   | 13.8938  | No change |
| NM_011448    | Sox9          | 0.116194 | 1 | 0.437262 | 3.26108   | 4.20772  | No change |
| NM_025443    | Pno1          | 0.116302 | 1 | 0.366621 | 14.6253   | 17.9592  | No change |
| NM_023045    | Xpo7          | 0.116308 | 1 | 0.256913 | 4.99256   | 5.67946  | No change |
| NM_183165    | Pyroxd1       | 0.116761 | 1 | 0.408862 | 7.66461   | 9.69428  | No change |
| NM_001102471 | Cnrm2         | 0.116818 | 1 | 0.553675 | 2.1352    | 2.99129  | No change |
| NM_001033361 | Pgr15l        | 0.11687  | 1 | 2.02075  | 0.0388695 | 0.186851 | No change |
| NM_008519    | Ltb4r1        | 0.11687  | 1 | 2.02075  | 0.1502    | 0.722036 | No change |
| NM_027470    | Pak4          | 0.116925 | 1 | 0.393963 | 6.37289   | 7.97677  | No change |
| NM_026267    | Necap1        | 0.117271 | 1 | 0.360909 | 10.1059   | 12.3602  | No change |
| NM_018858    | Pebp1         | 0.117491 | 1 | 0.160177 | 717.33    | 763.037  | No change |
| NM_026949    | Cnot8         | 0.117538 | 1 | 0.373068 | 10.7536   | 13.2646  | No change |
| NM_020483    | Sap30bp       | 0.11759  | 1 | 0.453604 | 5.88013   | 7.67468  | No change |
| NM_001159565 | Dctn3         | 0.117623 | 1 | 0.357959 | 28.1134   | 34.3137  | No change |
| NM_025321    | Sdhc          | 0.118267 | 1 | 0.278725 | 48.7673   | 56.3246  | No change |
| NM_178367    | Dhx33         | 0.118356 | 1 | 0.308671 | 7.80496   | 9.20433  | No change |
| NM_008722    | Npm1          | 0.118597 | 1 | 0.244225 | 75.4499   | 85.0771  | No change |
| NM_026729    | Ict1          | 0.118645 | 1 | 0.596796 | 7.78586   | 11.2479  | No change |
| NM_025310    | Ftsj3         | 0.11896  | 1 | 0.263325 | 24.9338   | 28.4909  | No change |
| NM_001040055 | Gm14316       | 0.119085 | 1 | 0.376116 | 48.7693   | 60.285   | No change |
| NM_011500    | Strn          | 0.119365 | 1 | 0.335784 | 7.84974   | 9.43372  | No change |
| NM_001081056 | Xpot          | 0.119488 | 1 | 0.266885 | 11.4274   | 13.09    | No change |
| NM_145713    | Hist1h1d      | 0.119606 | 1 | 0.488535 | 3.37111   | 4.50954  | No change |
| NM_008465    | Kpna1         | 0.119861 | 1 | 0.295416 | 11.8696   | 13.8691  | No change |
| NM_001159482 | Rab34         | 0.120185 | 1 | 0.63043  | 3.59607   | 5.32171  | No change |
| NM_010295    | Gclc          | 0.120191 | 1 | 0.32656  | 9.96485   | 11.8988  | No change |
| NM_133794    | Qars          | 0.120333 | 1 | 0.366925 | 9.41872   | 11.5681  | No change |
| NM_134090    | Kdelr3        | 0.120402 | 1 | 0.647678 | 3.25299   | 4.87407  | No change |
| NM_153561    | Nudt6         | 0.120431 | 1 | 0.727964 | 3.12058   | 4.95572  | No change |
| NM_016789    | Nptx2         | 0.12048  | 1 | 0.615253 | 2.07631   | 3.03937  | No change |
| NM_001164087 | Homer2        | 0.120549 | 1 | 0.549356 | 0.659995  | 0.921738 | No change |
| NM_019764    | Amotl2        | 0.120575 | 1 | 0.466736 | 2.74382   | 3.61439  | No change |
| NM_178597    | Camk2g        | 0.121031 | 1 | 0.309543 | 11.123    | 13.1252  | No change |
| NR_027923    | C630043F03Rik | 0.12116  | 1 | 0.601793 | 2.1009    | 3.04584  | No change |
| NM_153512    | Kcng3         | 0.121301 | 1 | 0.667453 | 1.26677   | 1.92526  | No change |
| NM_173865    | Slc41a1       | 0.121311 | 1 | 0.348499 | 5.99718   | 7.27153  | No change |
| NM_178799    | Acad12        | 0.121457 | 1 | 0.418112 | 6.71987   | 8.55446  | No change |
| NM_001177307 | Aldoa         | 0.12158  | 1 | 0.186538 | 228.433   | 247.471  | No change |
| NM_001042655 | Tbc1d17       | 0.12192  | 1 | 0.377655 | 8.38673   | 10.3781  | No change |
| NM_026219    | Uqcrb         | 0.122    | 1 | 0.335347 | 63.3194   | 76.0727  | No change |
| NM_173052    | Serpnb1b      | 0.122207 | 1 | 2.28378  | 0.0405663 | 0.3343   | No change |
| NR_028550    | Snord49a      | 0.122207 | 1 | 3.28378  | 0         | 9.26335  | No change |
| NR_033474    | 2810433D01Rik | 0.122207 | 1 | 3.28378  | 0         | 0.430531 | No change |
| NM_001033276 | Mll2          | 0.122355 | 1 | 0.256289 | 4.20163   | 4.77761  | No change |
| NM_007544    | Bid           | 0.12243  | 1 | 0.541948 | 4.0172    | 5.58079  | No change |
| NM_146123    | Cacnb4        | 0.122507 | 1 | 0.437204 | 1.78564   | 2.30379  | No change |
| NM_207688    | Espn          | 0.1226   | 1 | 0.400378 | 9.69801   | 12.1931  | No change |
| NM_177899    | Zfp866        | 0.122622 | 1 | 0.323836 | 6.23899   | 7.43567  | No change |
| NM_018761    | Cttnal1       | 0.122646 | 1 | 0.345053 | 7.92008   | 9.57992  | No change |
| NM_001081116 | Arhgef17      | 0.122717 | 1 | 0.351224 | 2.69253   | 3.27087  | No change |
| NM_028711    | Slc25a27      | 0.122737 | 1 | 0.531998 | 2.98276   | 4.11456  | No change |
| NM_139298    | Wnt9a         | 0.122842 | 1 | 0.811292 | 0.756162  | 1.27657  | No change |
| NM_027834    | 9130008F23Rik | 0.122895 | 1 | 0.913556 | 0.839285  | 1.52959  | No change |
| NM_177124    | Tnrc6b        | 0.122907 | 1 | 0.242078 | 6.16961   | 6.94643  | No change |
| NM_172606    | March6        | 0.122994 | 1 | 0.24224  | 16.9203   | 19.0529  | No change |
| NM_030058    | Spint4        | 0.123111 | 1 | 0.223447 | 201.138   | 223.553  | No change |
| NR_015491    | A630089N07Rik | 0.123129 | 1 | 0.690356 | 1.83144   | 2.82986  | No change |



|              |               |          |   |          |          |         |           |
|--------------|---------------|----------|---|----------|----------|---------|-----------|
| NM_178623    | Urgcp         | 0.123178 | 1 | 0.346075 | 5.68171  | 6.87734 | No change |
| NM_001081300 | Tshz1         | 0.123291 | 1 | 0.352332 | 4.72291  | 5.7418  | No change |
| NR_030688    | Gm6402        | 0.123319 | 1 | 0.578978 | 4.67703  | 6.67084 | No change |
| NM_025434    | Mrps28        | 0.123506 | 1 | 0.472486 | 15.6375  | 20.6822 | No change |
| NM_144516    | Zmynd11       | 0.1237   | 1 | 0.241234 | 27.4927  | 30.9362 | No change |
| NM_001033261 | Zfc3h1        | 0.124077 | 1 | 0.275629 | 9.2777   | 10.6923 | No change |
| NM_181416    | Arhgap11a     | 0.124162 | 1 | 0.39014  | 4.00151  | 4.99503 | No change |
| NM_027212    | Med30         | 0.12434  | 1 | 0.535151 | 9.12169  | 12.6108 | No change |
| NM_001038651 | Zfp953        | 0.124355 | 1 | 0.497865 | 2.10235  | 2.8308  | No change |
| NM_001033288 | Gm106         | 0.124464 | 1 | 0.87939  | 0.735479 | 1.30624 | No change |
| NM_025857    | Aagab         | 0.124633 | 1 | 0.327685 | 13.5633  | 16.2082 | No change |
| NM_177647    | Cdnf          | 0.12467  | 1 | 0.569224 | 2.22055  | 3.14517 | No change |
| NM_145393    | Ythdf2        | 0.124726 | 1 | 0.295956 | 12.3048  | 14.3828 | No change |
| NM_010588    | Jag2          | 0.124806 | 1 | 0.435783 | 3.55857  | 4.58655 | No change |
| NM_001146708 | Fas           | 0.125458 | 1 | 1.38687  | 1.3813   | 3.62189 | No change |
| NM_145547    | Zfp189        | 0.125923 | 1 | 0.316795 | 13.3891  | 15.8789 | No change |
| NM_001004362 | 2610008E11Rik | 0.12621  | 1 | 0.354863 | 6.50951  | 7.92773 | No change |
| NM_001081168 | Sap30l        | 0.126229 | 1 | 0.717196 | 2.2946   | 3.61504 | No change |
| NM_008292    | Hsd17b4       | 0.126255 | 1 | 0.402868 | 6.87845  | 8.66304 | No change |
| NM_009408    | Top1          | 0.126274 | 1 | 0.317454 | 10.3833  | 12.3198 | No change |
| NM_172826    | Dact2         | 0.126326 | 1 | 0.398584 | 6.7981   | 8.5362  | No change |
| NM_145986    | Fam83f        | 0.126386 | 1 | 0.612106 | 1.83954  | 2.68646 | No change |
| NM_001042407 | Pex10         | 0.126425 | 1 | 0.642783 | 2.91974  | 4.35889 | No change |
| NM_177670    | Tmem69        | 0.126473 | 1 | 0.485824 | 4.3974   | 5.87083 | No change |
| NM_172412    | Gpc2          | 0.12684  | 1 | 0.502708 | 3.82715  | 5.17078 | No change |
| NM_181988    | Rerg          | 0.126959 | 1 | 0.599282 | 2.82266  | 4.08454 | No change |
| NM_009472    | Unc5c         | 0.127136 | 1 | 0.85082  | 0.239907 | 0.41703 | No change |
| NM_010321    | Gnmt          | 0.127136 | 1 | 0.85082  | 2.16102  | 3.7565  | No change |
| NM_030682    | Tlr1          | 0.127355 | 1 | 0.791927 | 1.05883  | 1.76191 | No change |
| NM_019777    | Ikbke         | 0.12771  | 1 | 0.552297 | 2.30642  | 3.22757 | No change |
| NM_001163420 | Fam172a       | 0.128054 | 1 | 0.425623 | 4.26999  | 5.46425 | No change |
| NM_025598    | Pdpdf         | 0.128089 | 1 | 0.564168 | 8.74441  | 12.3405 | No change |
| NM_008914    | Ppp3cb        | 0.128249 | 1 | 0.313239 | 11.0079  | 13.0226 | No change |
| NM_025667    | Tmem222       | 0.128432 | 1 | 0.330208 | 24.0775  | 28.823  | No change |
| NM_001080780 | Ret           | 0.128862 | 1 | 0.577422 | 0.892404 | 1.27133 | No change |
| NM_175115    | Ikzf5         | 0.128912 | 1 | 0.340682 | 7.3503   | 8.86349 | No change |
| NM_011190    | Psme2         | 0.129011 | 1 | 0.682698 | 4.58404  | 7.04304 | No change |
| NM_175244    | Hectd3        | 0.129178 | 1 | 0.438528 | 3.19987  | 4.13208 | No change |
| NM_028119    | Ddb2          | 0.129333 | 1 | 0.404336 | 9.75337  | 12.2963 | No change |
| NM_001098836 | Atxn7l3       | 0.129389 | 1 | 0.336672 | 9.09937  | 10.942  | No change |
| NM_025909    | Oma1          | 0.129405 | 1 | 0.534993 | 4.36981  | 6.04029 | No change |
| NM_020048    | Med20         | 0.129595 | 1 | 0.374091 | 11.718   | 14.4638 | No change |
| NM_011275    | Rnaseh1       | 0.129686 | 1 | 0.649187 | 3.25266  | 4.87804 | No change |
| NM_133761    | Dcp1a         | 0.12988  | 1 | 0.330666 | 6.41582  | 7.68276 | No change |
| NM_007444    | Amd2          | 0.129891 | 1 | 0.258993 | 27.9905  | 31.8871 | No change |
| NM_009665    | Amd1          | 0.129891 | 1 | 0.258993 | 27.912   | 31.7976 | No change |
| NM_001081090 | Esf1          | 0.130111 | 1 | 0.353525 | 8.50615  | 10.3496 | No change |
| NR_033225    | Gm13375       | 0.130515 | 1 | 0.826573 | 1.76119  | 3.00641 | No change |
| NM_026434    | Rbm18         | 0.130614 | 1 | 0.351719 | 11.5699  | 14.0595 | No change |
| NM_001033908 | Med22         | 0.13068  | 1 | 0.354594 | 21.0047  | 25.5759 | No change |
| NM_011625    | Ppp1r13b      | 0.130831 | 1 | 0.302464 | 11.5002  | 13.5033 | No change |
| NM_017465    | Sult2b1       | 0.130922 | 1 | 0.668444 | 3.86501  | 5.87725 | No change |
| NM_172699    | Foxj3         | 0.130966 | 1 | 0.355132 | 6.01508  | 7.32684 | No change |
| NM_027453    | Btf3l4        | 0.130985 | 1 | 0.29244  | 18.1681  | 21.1842 | No change |
| NM_029576    | Rab1b         | 0.131054 | 1 | 0.276584 | 38.1317  | 43.9744 | No change |
| NM_023203    | Dctpp1        | 0.13107  | 1 | 0.548258 | 12.1493  | 16.9522 | No change |
| NM_010808    | Mmp24         | 0.13119  | 1 | 0.528892 | 1.9755   | 2.71885 | No change |
| NM_029931    | Milt3         | 0.131312 | 1 | 0.437124 | 3.12276  | 4.02847 | No change |
| NM_007945    | Eps8          | 0.131363 | 1 | 0.333421 | 8.07437  | 9.68738 | No change |
| NM_013796    | Nagpa         | 0.13141  | 1 | 0.559481 | 3.36806  | 4.73714 | No change |
| NM_030206    | Cygb          | 0.131542 | 1 | 0.52048  | 3.82698  | 5.23572 | No change |
| NM_010209    | Fh1           | 0.131581 | 1 | 0.3139   | 26.9462  | 31.8924 | No change |
| NM_178376    | Rraga         | 0.131796 | 1 | 0.400568 | 12.1562  | 15.2851 | No change |
| NR_015457    | B430010I23Rik | 0.131891 | 1 | 0.622868 | 2.28453  | 3.36186 | No change |
| NM_001100395 | Otof          | 0.13193  | 1 | 0.488782 | 1.55389  | 2.07879 | No change |
| NR_015523    | A730017L22Rik | 0.132024 | 1 | 0.775053 | 1.23246  | 2.02526 | No change |
| NM_001205081 | Trim47        | 0.132047 | 1 | 0.512773 | 4.2546   | 5.78907 | No change |
| NM_201357    | Tssc1         | 0.132047 | 1 | 0.512773 | 5.51942  | 7.51005 | No change |
| NM_001040459 | Shroom4       | 0.132102 | 1 | 0.571961 | 1.54244  | 2.18875 | No change |
| NM_139308    | Stard7        | 0.132102 | 1 | 0.322298 | 12.9193  | 15.3805 | No change |
| NM_007574    | C1qc          | 0.132372 | 1 | 0.38276  | 21.5559  | 26.7684 | No change |
| NM_024440    | Derl3         | 0.132461 | 1 | 0.312021 | 33.9597  | 40.1406 | No change |
| NM_026708    | Tlcd1         | 0.132588 | 1 | 0.386716 | 17.1652  | 21.375  | No change |
| NM_001161730 | Tap1          | 0.132657 | 1 | 0.541276 | 2.79647  | 3.88262 | No change |
| NM_023054    | Utp3          | 0.132875 | 1 | 0.390919 | 13.3204  | 16.6361 | No change |
| NM_001136085 | Uba1          | 0.13318  | 1 | 0.265739 | 23.9268  | 27.3856 | No change |

|              |               |          |   |          |          |         |           |
|--------------|---------------|----------|---|----------|----------|---------|-----------|
| NM_011424    | Ncor2         | 0.133206 | 1 | 0.324329 | 4.47612  | 5.33636 | No change |
| NM_172762    | Rbm34         | 0.133249 | 1 | 0.464041 | 3.6766   | 4.83349 | No change |
| NM_177266    | Gfm2          | 0.133315 | 1 | 0.391742 | 6.66343  | 8.32685 | No change |
| NM_028870    | Cltb          | 0.133387 | 1 | 0.435783 | 9.68449  | 12.4814 | No change |
| NM_020010    | Cyp51         | 0.13339  | 1 | 0.242931 | 28.7225  | 32.3579 | No change |
| NM_025912    | 2010011120Rik | 0.133584 | 1 | 0.412378 | 5.0264   | 6.37257 | No change |
| NM_173867    | Rcc2          | 0.13372  | 1 | 0.340035 | 9.02845  | 10.882  | No change |
| NM_022415    | Ptges         | 0.13416  | 1 | 0.372887 | 6.87948  | 8.48421 | No change |
| NM_001099276 | Pik3c2b       | 0.134172 | 1 | 0.575961 | 0.852594 | 1.21327 | No change |
| NM_001081549 | Rcan1         | 0.134288 | 1 | 0.405254 | 8.27679  | 10.4412 | No change |
| NM_025883    | Zdhhc6        | 0.134332 | 1 | 0.322582 | 18.9488  | 22.5629 | No change |
| NM_133871    | Ifi44         | 0.134599 | 1 | 0.936977 | 0.599148 | 1.11093 | No change |
| NR_037954    | 1110054M08Rik | 0.134599 | 1 | 0.936977 | 2.04019  | 3.7829  | No change |
| NM_144842    | Zmym5         | 0.134921 | 1 | 0.28692  | 11.9433  | 13.8725 | No change |
| NM_198029    | Fermt1        | 0.134921 | 1 | 0.480282 | 2.18827  | 2.90989 | No change |
| NM_007725    | Cnn2          | 0.134936 | 1 | 0.473642 | 6.72682  | 8.90337 | No change |
| NM_028276    | Utp14a        | 0.135045 | 1 | 0.487472 | 4.52961  | 6.05395 | No change |
| NM_013886    | Hdgfrp3       | 0.135152 | 1 | 0.297274 | 9.53705  | 11.1577 | No change |
| NM_001081367 | Kctd17        | 0.135262 | 1 | 0.566906 | 4.51631  | 6.38547 | No change |
| NM_001146073 | Hexdc         | 0.135871 | 1 | 0.537881 | 4.22059  | 5.84558 | No change |
| NM_026742    | Ndufaf4       | 0.135953 | 1 | 0.482242 | 3.14693  | 4.19044 | No change |
| NM_153167    | Dcaf10        | 0.136021 | 1 | 0.351383 | 4.30931  | 5.23528 | No change |
| NM_007940    | Ephx2         | 0.136091 | 1 | 0.435783 | 7.63711  | 9.8426  | No change |
| NM_025993    | Mis12         | 0.136103 | 1 | 0.426133 | 6.02191  | 7.70858 | No change |
| NM_009931    | Col4a1        | 0.136322 | 1 | 0.320774 | 6.47939  | 7.70546 | No change |
| NM_011842    | Mta2          | 0.136371 | 1 | 0.338262 | 11.5139  | 13.8605 | No change |
| NM_007398    | Ada           | 0.136437 | 1 | 0.716519 | 2.27166  | 3.5763  | No change |
| NM_026323    | Wfdc2         | 0.136437 | 1 | 0.716519 | 5.21713  | 8.21337 | No change |
| NM_011650    | Tsn           | 0.136449 | 1 | 0.292    | 20.0433  | 23.3634 | No change |
| NM_145400    | Ube4a         | 0.136451 | 1 | 0.280943 | 11.6941  | 13.5267 | No change |
| NM_009275    | Srpb          | 0.136569 | 1 | 0.282179 | 23.3242  | 27.0026 | No change |
| NM_198294    | Tanc1         | 0.136687 | 1 | 0.377568 | 3.12481  | 3.8663  | No change |
| NM_025675    | Atpbd4        | 0.136804 | 1 | 0.452992 | 5.13663  | 6.70049 | No change |
| NM_001080931 | Med13         | 0.136996 | 1 | 0.225701 | 16.2776  | 18.1198 | No change |
| NM_029609    | Lhpp          | 0.137263 | 1 | 0.698817 | 2.472    | 3.84196 | No change |
| NM_001037098 | Nacc2         | 0.137375 | 1 | 0.353858 | 4.45881  | 5.42624 | No change |
| NM_172624    | Dpp9          | 0.13738  | 1 | 0.433272 | 4.54821  | 5.8513  | No change |
| NM_018813    | Cpsf3         | 0.137416 | 1 | 0.399382 | 8.05825  | 10.1236 | No change |
| NM_146015    | Efemp1        | 0.137488 | 1 | 0.540965 | 4.03918  | 5.60647 | No change |
| NM_177648    | Dolk          | 0.13769  | 1 | 0.499746 | 4.88441  | 6.58478 | No change |
| NM_001033161 | Tradd         | 0.137696 | 1 | 0.634112 | 3.77399  | 5.59814 | No change |
| NM_026378    | Dalrd3        | 0.137757 | 1 | 0.359611 | 16.8114  | 20.5412 | No change |
| NM_001168273 | Sec24c        | 0.137913 | 1 | 0.29223  | 14.6722  | 17.1052 | No change |
| NM_001177947 | 1810020D17Rik | 0.137971 | 1 | 0.46681  | 18.4038  | 24.2411 | No change |
| NM_001001880 | Mpz1          | 0.138269 | 1 | 0.390268 | 9.94286  | 12.4119 | No change |
| NM_025607    | Rnf181        | 0.138301 | 1 | 0.235538 | 115.046  | 128.903 | No change |
| NM_138676    | Shkbp1        | 0.138338 | 1 | 0.562212 | 3.14761  | 4.43532 | No change |
| NM_172562    | Tada2a        | 0.138429 | 1 | 0.456042 | 6.47924  | 8.46991 | No change |
| NM_175532    | Nlrp10        | 0.138434 | 1 | 0.787627 | 0.637388 | 1.05693 | No change |
| NM_199470    | Cdh24         | 0.138434 | 1 | 0.787627 | 1.04744  | 1.73688 | No change |
| NM_183086    | Mrps10        | 0.13855  | 1 | 0.650608 | 4.39505  | 6.59701 | No change |
| NM_021433    | Stx6          | 0.138559 | 1 | 0.374928 | 10.4015  | 12.8459 | No change |
| NM_001163526 | S100a14       | 0.138618 | 1 | 0.842553 | 2.54518  | 4.39537 | No change |
| NM_133823    | Mmaa          | 0.139532 | 1 | 0.554427 | 2.72104  | 3.81303 | No change |
| NM_145591    | Zfp958        | 0.139813 | 1 | 0.476425 | 5.1362   | 6.81117 | No change |
| NM_001081394 | 0610007L01Rik | 0.139929 | 1 | 0.298143 | 16.2881  | 19.0673 | No change |
| NM_025796    | Mrpl33        | 0.140624 | 1 | 0.434544 | 34.6969  | 44.6768 | No change |
| NM_001193667 | Gm1987        | 0.140649 | 1 | 0.520855 | 10.7343  | 14.6883 | No change |
| NM_007732    | Col17a1       | 0.140649 | 1 | 0.520855 | 1.7205   | 2.35424 | No change |
| NM_011124    | Ccl21a        | 0.140649 | 1 | 0.520855 | 10.759   | 14.7221 | No change |
| NM_001123371 | Pnp2          | 0.140679 | 1 | 0.49812  | 8.71874  | 11.7401 | No change |
| NM_153804    | Plekkg3       | 0.140679 | 1 | 0.49812  | 2.15197  | 2.89772 | No change |
| NM_001167996 | 1110032F04Rik | 0.140752 | 1 | 1.03985  | 0.513641 | 1.03036 | No change |
| NM_133358    | Zfp617        | 0.141093 | 1 | 0.379551 | 8.51067  | 10.5446 | No change |
| NM_008731    | Npy2r         | 0.141201 | 1 | 1.11385  | 0.331772 | 0.70488 | No change |
| NM_024495    | Car13         | 0.141201 | 1 | 1.11385  | 0.485031 | 1.03049 | No change |
| NM_024178    | Alg14         | 0.14121  | 1 | 0.725784 | 3.98245  | 6.31129 | No change |
| NM_030091    | Ola1          | 0.141291 | 1 | 0.435783 | 15.7989  | 20.3607 | No change |
| NM_007746    | Map3k8        | 0.141485 | 1 | 0.747072 | 1.33437  | 2.14772 | No change |
| NM_001195096 | Phactr2       | 0.141529 | 1 | 0.333692 | 4.73804  | 5.68547 | No change |
| NM_016778    | Bok           | 0.141609 | 1 | 0.70723  | 2.72542  | 4.26134 | No change |
| NM_028779    | Ampd2         | 0.141679 | 1 | 0.473751 | 3.41782  | 4.52381 | No change |
| NR_028445    | F930015N05Rik | 0.141683 | 1 | 0.820124 | 0.728429 | 1.23708 | No change |
| NM_007970    | Ezh1          | 0.141736 | 1 | 0.302516 | 13.5431  | 15.9022 | No change |
| NM_010579    | Eif6          | 0.141915 | 1 | 0.346146 | 23.1688  | 28.0441 | No change |
| NM_029357    | Pcdh1         | 0.142039 | 1 | 0.487008 | 2.94704  | 3.93728 | No change |

|              |               |          |   |          |          |          |           |
|--------------|---------------|----------|---|----------|----------|----------|-----------|
| NM_001142963 | Gm10778       | 0.142054 | 1 | 0.523499 | 1.96173  | 2.68931  | No change |
| NM_197989    | Fam58b        | 0.142054 | 1 | 0.523499 | 7.57284  | 10.3815  | No change |
| NM_175343    | Chdh          | 0.142335 | 1 | 0.27501  | 14.9793  | 17.2554  | No change |
| NM_001025586 | Nr2c2ap       | 0.142612 | 1 | 0.616355 | 4.88557  | 7.15484  | No change |
| NM_175177    | Bdh1          | 0.142616 | 1 | 0.603906 | 1.97966  | 2.87349  | No change |
| NM_020498    | Ly6i          | 0.142681 | 1 | 0.771749 | 3.49258  | 5.72365  | No change |
| NM_177474    | D19Bwg1357e   | 0.142773 | 1 | 0.345604 | 10.1459  | 12.2762  | No change |
| NM_010881    | Ncoa1         | 0.142905 | 1 | 0.315134 | 6.72301  | 7.96371  | No change |
| NM_001025597 | Ikzf1         | 0.14292  | 1 | 0.592689 | 1.25536  | 1.80764  | No change |
| NM_010582    | Itih2         | 0.14297  | 1 | 0.421339 | 5.80402  | 7.40445  | No change |
| NM_001113364 | Tbc1d14       | 0.143082 | 1 | 0.318333 | 12.2344  | 14.5245  | No change |
| NM_019402    | Pabpn1        | 0.143118 | 1 | 0.300166 | 33.2334  | 38.9585  | No change |
| NM_145433    | Mrm1          | 0.143456 | 1 | 0.58253  | 2.75733  | 3.94169  | No change |
| NR_027817    | 1500011B03Rik | 0.143525 | 1 | 0.46553  | 9.98601  | 13.141   | No change |
| NM_199302    | Lrsam1        | 0.143648 | 1 | 0.444893 | 3.85916  | 5.00531  | No change |
| NM_027896    | Coasy         | 0.143816 | 1 | 0.45526  | 5.98787  | 7.82299  | No change |
| NM_009012    | Rad50         | 0.144028 | 1 | 0.33106  | 8.06074  | 9.65479  | No change |
| NM_009469    | Ulk1          | 0.144037 | 1 | 0.400812 | 4.13114  | 5.19504  | No change |
| NM_026441    | Pef1          | 0.144208 | 1 | 0.320306 | 30.3306  | 36.0575  | No change |
| NM_016748    | Ctps          | 0.144708 | 1 | 0.377524 | 9.73898  | 12.0492  | No change |
| NM_001161329 | Nol11         | 0.144922 | 1 | 0.389489 | 7.66622  | 9.56441  | No change |
| NR_002841    | Rn4.5s        | 0.145062 | 1 | 0.537454 | 50.0668  | 69.3154  | No change |
| NM_001136270 | Prr24         | 0.145102 | 1 | 0.60862  | 3.6091   | 5.25612  | No change |
| NM_175340    | Nhlrc1        | 0.145152 | 1 | 0.800697 | 1.21522  | 2.03418  | No change |
| NM_001081204 | B3galt1       | 0.145295 | 1 | 0.663542 | 1.04317  | 1.58025  | No change |
| NM_019561    | Ensa          | 0.145332 | 1 | 0.390225 | 20.1493  | 25.1513  | No change |
| NM_010760    | Magoh         | 0.145481 | 1 | 0.507088 | 17.0794  | 23.1431  | No change |
| NM_001168645 | Slc6a18       | 0.145573 | 1 | 0.92121  | 0.466116 | 0.853596 | No change |
| NM_011599    | Tle1          | 0.145742 | 1 | 0.390964 | 5.40762  | 6.75351  | No change |
| NM_008428    | Kcnj8         | 0.145769 | 1 | 0.887579 | 0.95557  | 1.70618  | No change |
| NM_177704    | Sytl5         | 0.145769 | 1 | 0.887579 | 0.908643 | 1.62239  | No change |
| NM_023835    | Trim12a       | 0.14582  | 1 | 0.439493 | 10.6025  | 13.6991  | No change |
| NM_011358    | Srsf2         | 0.145845 | 1 | 0.262288 | 57.7539  | 65.9436  | No change |
| NM_027257    | Obfc2b        | 0.145895 | 1 | 0.500878 | 10.2684  | 13.8532  | No change |
| NM_001099624 | Rapgef2       | 0.146077 | 1 | 0.385619 | 3.79194  | 4.71804  | No change |
| NM_001033329 | Arhgef9       | 0.146111 | 1 | 0.715891 | 0.764787 | 1.2032   | No change |
| NM_030017    | Rdh12         | 0.146167 | 1 | 0.735343 | 2.12326  | 3.38798  | No change |
| NM_001162908 | Sesn1         | 0.146432 | 1 | 0.354169 | 10.4912  | 12.7699  | No change |
| NR_028367    | Nip7          | 0.146505 | 1 | 0.440749 | 5.15005  | 6.66007  | No change |
| NM_024442    | Cyp4f16       | 0.146991 | 1 | 0.757711 | 1.51157  | 2.45156  | No change |
| NM_177778    | Armc7         | 0.147022 | 1 | 0.651951 | 2.23117  | 3.35174  | No change |
| NM_201637    | Chd8          | 0.147023 | 1 | 0.258404 | 14.6874  | 16.7249  | No change |
| NM_001199695 | Txlna         | 0.147036 | 1 | 0.288785 | 16.0736  | 18.6939  | No change |
| NM_001025431 | Btbd3         | 0.147106 | 1 | 0.413415 | 4.28255  | 5.43308  | No change |
| NM_144884    | Tor1a         | 0.14729  | 1 | 0.478195 | 8.63962  | 11.4707  | No change |
| NM_145566    | Agfg2         | 0.14759  | 1 | 0.60152  | 4.27651  | 6.19639  | No change |
| NM_011602    | Tln1          | 0.147611 | 1 | 0.2614   | 13.4501  | 15.3478  | No change |
| NM_021547    | Stard3        | 0.147771 | 1 | 0.526238 | 4.58283  | 6.29439  | No change |
| NM_080451    | Synpo2        | 0.147771 | 1 | 0.526238 | 1.32217  | 1.81596  | No change |
| NM_009068    | Ripk1         | 0.147994 | 1 | 0.386184 | 5.58164  | 6.94751  | No change |
| NM_001146318 | Cnp           | 0.147996 | 1 | 0.457809 | 5.66187  | 7.41014  | No change |
| NM_145595    | Cbr4          | 0.148042 | 1 | 0.473851 | 11.6259  | 15.3884  | No change |
| NM_029688    | Srxn1         | 0.148078 | 1 | 0.328522 | 17.2951  | 20.6785  | No change |
| NM_024282    | Pppde1        | 0.148687 | 1 | 0.419958 | 4.53261  | 5.77668  | No change |
| NM_183220    | Accs          | 0.148815 | 1 | 0.670248 | 2.33705  | 3.55721  | No change |
| NM_026007    | Eef1g         | 0.148823 | 1 | 0.23767  | 121.707  | 136.609  | No change |
| NM_173765    | Aasdh         | 0.148839 | 1 | 0.427963 | 4.86756  | 6.23847  | No change |
| NM_010357    | Gsta4         | 0.14885  | 1 | 0.409489 | 21.679   | 27.4274  | No change |
| NM_198865    | Slitrk5       | 0.148869 | 1 | 1.32031  | 0.173979 | 0.433106 | No change |
| NM_009307    | Syt2          | 0.148893 | 1 | 0.641484 | 1.56428  | 2.33225  | No change |
| NM_027917    | Shroom1       | 0.148893 | 1 | 0.641484 | 1.60456  | 2.39231  | No change |
| NR_015528    | BC029722      | 0.148915 | 1 | 0.454537 | 10.6796  | 13.945   | No change |
| NM_011595    | Timp3         | 0.14968  | 1 | 0.308002 | 12.4914  | 14.7232  | No change |
| NM_001045536 | Zzef1         | 0.149695 | 1 | 0.311426 | 5.01914  | 5.93     | No change |
| NM_053207    | Egln1         | 0.149809 | 1 | 0.421977 | 5.37925  | 6.86537  | No change |
| NR_002862    | Gm5088        | 0.149844 | 1 | 0.451436 | 4.7341   | 6.16814  | No change |
| NM_153393    | Col23a1       | 0.149848 | 1 | 0.54638  | 1.50089  | 2.091    | No change |
| NM_013700    | Usp5          | 0.149994 | 1 | 0.279006 | 28.022   | 32.3692  | No change |
| NR_027357    | Slc25a44      | 0.150026 | 1 | 0.362613 | 9.17966  | 11.2394  | No change |
| NM_010690    | Lats1         | 0.150048 | 1 | 0.281184 | 11.9294  | 13.801   | No change |
| NM_177846    | Lcmt2         | 0.150245 | 1 | 0.618327 | 1.73874  | 2.54966  | No change |
| NM_001199337 | Apoo          | 0.150304 | 1 | 0.658175 | 4.0659   | 6.13497  | No change |
| NM_001172054 | Il11ra1       | 0.150495 | 1 | 0.467492 | 7.43341  | 9.79498  | No change |
| NM_008235    | Hes1          | 0.150532 | 1 | 0.556373 | 5.57159  | 7.81735  | No change |
| NM_170590    | Cpne1         | 0.150584 | 1 | 0.385268 | 7.44917  | 9.26602  | No change |
| NM_144535    | Mudeng        | 0.150671 | 1 | 0.431267 | 5.61507  | 7.21312  | No change |

|              |               |          |   |          |          |          |           |
|--------------|---------------|----------|---|----------|----------|----------|-----------|
| NM_011488    | Stat5a        | 0.150717 | 1 | 0.509783 | 2.7067   | 3.67449  | No change |
| NM_172918    | Zfp317        | 0.150744 | 1 | 0.339415 | 10.112   | 12.1822  | No change |
| NR_030671    | AW011738      | 0.150865 | 1 | 0.631986 | 2.03112  | 3.00764  | No change |
| NM_133222    | Eltf1         | 0.150888 | 1 | 0.706945 | 0.984459 | 1.53863  | No change |
| NM_030595    | Nbea          | 0.150967 | 1 | 0.25653  | 12.2025  | 13.8771  | No change |
| NM_001083320 | Magi1         | 0.151038 | 1 | 0.406731 | 3.00945  | 3.80005  | No change |
| NM_008926    | Prkg2         | 0.151114 | 1 | 1.5124   | 0.148409 | 0.428055 | No change |
| NM_176952    | 6430573F11Rik | 0.151318 | 1 | 0.74521  | 1.9094   | 3.06833  | No change |
| NM_008539    | Smad1         | 0.15151  | 1 | 0.360976 | 10.7572  | 13.1558  | No change |
| NM_019937    | Ccnl1         | 0.1525   | 1 | 0.334608 | 20.4043  | 24.4993  | No change |
| NM_146124    | Arhgap1       | 0.152628 | 1 | 0.36292  | 10.5239  | 12.8879  | No change |
| NM_001081290 | Prcc2c        | 0.152635 | 1 | 0.243581 | 17.3699  | 19.5769  | No change |
| NM_133918    | Emilin1       | 0.15289  | 1 | 0.579518 | 2.0924   | 2.98438  | No change |
| NM_180678    | Gars          | 0.152956 | 1 | 0.41682  | 8.45647  | 10.7536  | No change |
| NM_011156    | Prep          | 0.153179 | 1 | 0.552544 | 3.07582  | 4.30376  | No change |
| NM_175162    | Stox2         | 0.153298 | 1 | 0.318675 | 5.73044  | 6.80458  | No change |
| NM_024243    | Fuca1         | 0.153346 | 1 | 0.317583 | 21.4631  | 25.4669  | No change |
| NM_013626    | Pam           | 0.153405 | 1 | 0.316522 | 13.3848  | 15.87    | No change |
| NM_153134    | Irgq          | 0.153558 | 1 | 0.440505 | 2.76541  | 3.57548  | No change |
| NM_001081225 | Fam178a       | 0.153575 | 1 | 0.276584 | 14.2425  | 16.4243  | No change |
| NM_010283    | Ggta1         | 0.153752 | 1 | 0.453865 | 4.29508  | 5.60554  | No change |
| NM_008512    | Lrp1          | 0.154009 | 1 | 0.259275 | 9.04216  | 10.3027  | No change |
| NM_013860    | Limd1         | 0.154124 | 1 | 0.317727 | 11.2445  | 13.3434  | No change |
| NM_008958    | Ptch2         | 0.154135 | 1 | 0.545966 | 2.45467  | 3.41862  | No change |
| NM_008867    | Pla2r1        | 0.154463 | 1 | 0.392086 | 4.51771  | 5.64634  | No change |
| NM_177171    | Heatr5a       | 0.154561 | 1 | 0.3031   | 8.5758   | 10.0735  | No change |
| NM_001166364 | 2310046O06Rik | 0.154674 | 1 | 0.423364 | 6.36476  | 8.13083  | No change |
| NM_018823    | Nfat5         | 0.154707 | 1 | 0.272299 | 8.02607  | 9.22805  | No change |
| NM_026573    | Upf3b         | 0.154762 | 1 | 0.401017 | 10.6705  | 13.4198  | No change |
| NM_001159907 | Tarbp1        | 0.154886 | 1 | 0.555692 | 1.63902  | 2.29845  | No change |
| NM_007459    | Ap2a2         | 0.154974 | 1 | 0.311535 | 12.8749  | 15.2124  | No change |
| NM_029880    | Ptgr2         | 0.155148 | 1 | 0.369372 | 10.1174  | 12.4459  | No change |
| NM_026615    | Urm1          | 0.155287 | 1 | 0.456616 | 7.12214  | 9.31306  | No change |
| NM_054056    | Pawr          | 0.155298 | 1 | 0.715305 | 2.17314  | 3.41675  | No change |
| NM_018854    | Ift20         | 0.155309 | 1 | 0.461294 | 18.4226  | 24.169   | No change |
| NM_024227    | Mrp128        | 0.155333 | 1 | 0.452213 | 14.7893  | 19.2791  | No change |
| NM_010128    | Emp1          | 0.155367 | 1 | 0.574489 | 2.7662   | 3.93122  | No change |
| NM_133804    | Tmem132a      | 0.155642 | 1 | 0.628428 | 1.65793  | 2.44859  | No change |
| NM_029578    | Tgds          | 0.15576  | 1 | 0.54895  | 3.81542  | 5.32489  | No change |
| NM_001029988 | Fat2          | 0.155807 | 1 | 0.425366 | 1.33848  | 1.71227  | No change |
| NM_013509    | Eno2          | 0.155974 | 1 | 0.907404 | 0.768185 | 1.39162  | No change |
| NM_144875    | Rab711        | 0.155974 | 1 | 0.907404 | 1.69983  | 3.07934  | No change |
| NM_144822    | Cbara1        | 0.156078 | 1 | 0.453547 | 6.89574  | 8.99755  | No change |
| NM_145822    | Cd3eap        | 0.156226 | 1 | 0.534187 | 4.18902  | 5.78547  | No change |
| NM_001077712 | Stag2         | 0.156316 | 1 | 0.387523 | 4.47065  | 5.56968  | No change |
| NM_001080977 | Rsb1l1        | 0.156337 | 1 | 0.398091 | 4.36679  | 5.48062  | No change |
| NM_173764    | Tapt1         | 0.156342 | 1 | 0.322588 | 15.1211  | 18.0043  | No change |
| NM_031391    | Gtf2a1        | 0.15647  | 1 | 0.280638 | 16.8368  | 19.4707  | No change |
| NM_001102407 | Rbm8a         | 0.156478 | 1 | 0.494945 | 4.55562  | 6.1198   | No change |
| NM_019949    | Ube2l6        | 0.156669 | 1 | 0.755401 | 2.46212  | 3.98551  | No change |
| NM_028351    | Rspo3         | 0.156726 | 1 | 0.642964 | 2.2688   | 3.3858   | No change |
| NM_177151    | Vps13b        | 0.156851 | 1 | 0.246192 | 14.047   | 15.8605  | No change |
| NM_177178    | Lmbrd2        | 0.156886 | 1 | 0.391002 | 8.51142  | 10.6296  | No change |
| NM_001081149 | Myst3         | 0.157118 | 1 | 0.299554 | 7.94222  | 9.30624  | No change |
| NM_010256    | Gart          | 0.157266 | 1 | 0.319581 | 16.6534  | 19.7873  | No change |
| NM_133900    | Psph          | 0.157387 | 1 | 0.474797 | 8.88732  | 11.7705  | No change |
| NM_010111    | Efnb2         | 0.157536 | 1 | 0.42842  | 4.42136  | 5.66815  | No change |
| NM_001159631 | Nek6          | 0.157555 | 1 | 0.85082  | 0.768269 | 1.33407  | No change |
| NM_023485    | Sync          | 0.157555 | 1 | 0.85082  | 1.19689  | 2.07835  | No change |
| NM_146019    | Chd3          | 0.157598 | 1 | 0.274319 | 15.1734  | 17.4702  | No change |
| NM_008492    | Ldhd          | 0.157758 | 1 | 0.295185 | 60.4546  | 70.6223  | No change |
| NM_001081069 | Rgs11         | 0.157803 | 1 | 0.5698   | 3.89113  | 5.51137  | No change |
| NM_138751    | Tmem47        | 0.157803 | 1 | 0.5698   | 1.9122   | 2.70843  | No change |
| NM_009686    | Apbb2         | 0.157892 | 1 | 0.491739 | 3.64733  | 4.88853  | No change |
| NM_001045553 | Zfp868        | 0.158122 | 1 | 0.429451 | 7.77531  | 9.97504  | No change |
| NM_026310    | Mrp18         | 0.158315 | 1 | 0.379172 | 30.5225  | 37.8044  | No change |
| NM_025333    | Sdhaf2        | 0.158414 | 1 | 0.388677 | 8.6638   | 10.8023  | No change |
| NM_134151    | Yars          | 0.158436 | 1 | 0.433612 | 6.42611  | 8.2682   | No change |
| NM_009395    | Tnfaip1       | 0.158542 | 1 | 0.343337 | 11.4245  | 13.8007  | No change |
| NM_011294    | Sub1          | 0.158676 | 1 | 0.273106 | 34.1435  | 39.2786  | No change |
| NM_053164    | Mrp143        | 0.158917 | 1 | 0.414285 | 17.8111  | 22.6085  | No change |
| NM_009933    | Col6a1        | 0.159039 | 1 | 0.317207 | 14.6888  | 17.4241  | No change |
| NM_001045959 | Mink1         | 0.159111 | 1 | 0.397504 | 5.01711  | 6.29416  | No change |
| NM_175109    | Rps19bp1      | 0.159208 | 1 | 0.539619 | 11.1677  | 15.4826  | No change |
| NM_181322    | Ctcf          | 0.159221 | 1 | 0.353848 | 9.95353  | 12.1123  | No change |
| NM_175337    | Mlh3          | 0.159333 | 1 | 0.295543 | 14.6242  | 17.0881  | No change |

|              |               |          |   |          |          |          |           |
|--------------|---------------|----------|---|----------|----------|----------|-----------|
| NM_023647    | Nipa2         | 0.159673 | 1 | 0.381495 | 7.99787  | 9.92201  | No change |
| NM_198885    | Scx           | 0.159711 | 1 | 0.706679 | 3.68097  | 5.75086  | No change |
| NM_175392    | Fam73b        | 0.159771 | 1 | 0.500878 | 3.30093  | 4.45278  | No change |
| NM_146047    | Ciptm1l       | 0.159875 | 1 | 0.33718  | 19.4015  | 23.3366  | No change |
| NM_173397    | Fitm2         | 0.160043 | 1 | 0.6914   | 2.71476  | 4.19473  | No change |
| NM_173374    | Srsf1         | 0.160294 | 1 | 0.246462 | 39.854   | 45.0075  | No change |
| NM_010683    | Lamc1         | 0.160386 | 1 | 0.372167 | 4.18779  | 5.16157  | No change |
| NM_023721    | Atp6v1d       | 0.160393 | 1 | 0.276731 | 77.7002  | 89.6114  | No change |
| NM_011801    | Cfdp1         | 0.160412 | 1 | 0.324766 | 44.397   | 52.9421  | No change |
| NM_053206    | Magee2        | 0.160475 | 1 | 1.20696  | 0.421287 | 0.960933 | No change |
| NM_001146176 | Max           | 0.160594 | 1 | 0.380863 | 14.8688  | 18.4377  | No change |
| NM_001190989 | Ndfip2        | 0.160766 | 1 | 0.441429 | 8.03906  | 10.4002  | No change |
| NM_001024604 | Ankrd28       | 0.160892 | 1 | 0.291947 | 16.4203  | 19.1388  | No change |
| NM_019400    | Rabep1        | 0.161439 | 1 | 0.337163 | 8.66182  | 10.4185  | No change |
| NM_175316    | Slco2b1       | 0.161996 | 1 | 0.510858 | 2.54528  | 3.45763  | No change |
| NM_133729    | 2610018G03Rik | 0.16209  | 1 | 0.617287 | 3.13149  | 4.58774  | No change |
| NM_027203    | Leng1         | 0.162139 | 1 | 0.459945 | 7.05432  | 9.24556  | No change |
| NM_001081235 | Mn1           | 0.162238 | 1 | 0.765932 | 0.545898 | 0.890358 | No change |
| NM_183297    | Nxph4         | 0.162238 | 1 | 0.765932 | 1.99717  | 3.25738  | No change |
| NM_019579    | Mpp5          | 0.162261 | 1 | 0.285264 | 17.7203  | 20.5582  | No change |
| NM_145922    | Kcnc4         | 0.162282 | 1 | 0.545194 | 3.03013  | 4.21739  | No change |
| NM_133953    | Sf3b3         | 0.162445 | 1 | 0.278964 | 25.3871  | 29.3242  | No change |
| NM_001177313 | Orc4          | 0.162606 | 1 | 0.531412 | 7.08404  | 9.76398  | No change |
| NM_198653    | lars2         | 0.163005 | 1 | 0.313264 | 18.3092  | 21.659   | No change |
| NM_007730    | Col12a1       | 0.163065 | 1 | 0.300074 | 6.71883  | 7.87552  | No change |
| NM_138306    | Dgkz          | 0.163168 | 1 | 0.394407 | 7.5996   | 9.51323  | No change |
| NM_025870    | 2310047B19Rik | 0.163208 | 1 | 0.513026 | 6.0028   | 8.1669   | No change |
| NM_015801    | Pnpla6        | 0.163705 | 1 | 0.462702 | 3.48622  | 4.57793  | No change |
| NM_001177670 | Golph3l       | 0.164044 | 1 | 0.393525 | 12.1437  | 15.1921  | No change |
| NM_001099628 | Atad2b        | 0.164172 | 1 | 0.37089  | 4.13702  | 5.09439  | No change |
| NM_145916    | Zfp7          | 0.164303 | 1 | 0.564516 | 3.01142  | 4.24907  | No change |
| NM_011489    | Stat5b        | 0.164411 | 1 | 0.412052 | 4.37653  | 5.54655  | No change |
| NM_001025379 | Sema3g        | 0.164418 | 1 | 0.684603 | 1.2668   | 1.94767  | No change |
| NM_001003717 | Osbp18        | 0.164535 | 1 | 0.332617 | 7.22887  | 8.66739  | No change |
| NM_001177527 | Zfp964        | 0.164581 | 1 | 0.732765 | 2.20294  | 3.50703  | No change |
| NR_029432    | 1500015A07Rik | 0.164581 | 1 | 0.732765 | 2.05639  | 3.27373  | No change |
| NM_011874    | Psmc4         | 0.164656 | 1 | 0.304007 | 52.658   | 61.8922  | No change |
| NM_029420    | Slx1b         | 0.164779 | 1 | 0.46895  | 4.03962  | 5.32793  | No change |
| NM_029655    | Snx7          | 0.164832 | 1 | 0.557461 | 3.98062  | 5.58852  | No change |
| NM_007992    | Fbln2         | 0.165139 | 1 | 0.67185  | 1.10525  | 1.68373  | No change |
| NM_144857    | Rrp36         | 0.165456 | 1 | 0.550919 | 7.51077  | 10.4958  | No change |
| NR_027344    | Trub2         | 0.165523 | 1 | 0.442376 | 7.23542  | 9.36652  | No change |
| NM_001166553 | Rnf145        | 0.165664 | 1 | 0.457809 | 3.79492  | 4.96614  | No change |
| NM_007922    | Eik1          | 0.165788 | 1 | 0.575586 | 2.22466  | 3.16367  | No change |
| NM_015814    | Dkk3          | 0.165901 | 1 | 0.603439 | 2.03453  | 2.95119  | No change |
| NM_181394    | Anapc13       | 0.16602  | 1 | 0.417636 | 54.4903  | 69.3276  | No change |
| NM_019693    | Ddx39b        | 0.166092 | 1 | 0.362065 | 21.5211  | 26.3385  | No change |
| NM_010453    | Hoxa5         | 0.166142 | 1 | 0.867215 | 1.26242  | 2.21837  | No change |
| NM_001081240 | Prmt10        | 0.166464 | 1 | 0.471902 | 5.3128   | 7.02163  | No change |
| NM_172742    | Mtmr10        | 0.166823 | 1 | 0.416178 | 4.35162  | 5.53087  | No change |
| NM_001039200 | C230096C10Rik | 0.166878 | 1 | 0.346089 | 7.2417   | 8.76457  | No change |
| NM_145362    | Alg1          | 0.166935 | 1 | 0.519674 | 6.17733  | 8.4436   | No change |
| NM_172295    | Mab2113       | 0.166973 | 1 | 1.04347  | 0.391753 | 0.786916 | No change |
| NM_021353    | Slc26a3       | 0.167257 | 1 | 0.649908 | 2.09503  | 3.14154  | No change |
| NM_028106    | Zbed3         | 0.167467 | 1 | 0.482855 | 7.28575  | 9.70353  | No change |
| NM_001045482 | Rbak          | 0.167781 | 1 | 0.503801 | 3.60445  | 4.87191  | No change |
| NM_011509    | Gm3258        | 0.167815 | 1 | 0.50944  | 16.3926  | 22.2451  | No change |
| NM_001141921 | Lrfr1         | 0.167823 | 1 | 1.64991  | 0.242739 | 0.777921 | No change |
| NM_001164805 | Thsd7a        | 0.167931 | 1 | 0.571062 | 0.741279 | 1.05076  | No change |
| NM_145934    | Stap2         | 0.168127 | 1 | 0.42713  | 14.0227  | 17.9598  | No change |
| NM_026936    | Oxa1l         | 0.168146 | 1 | 0.443385 | 7.26083  | 9.40592  | No change |
| NM_026984    | Mll5          | 0.168434 | 1 | 0.321054 | 8.6324   | 10.2672  | No change |
| NM_027279    | 2810422O20Rik | 0.168496 | 1 | 0.723065 | 2.77432  | 4.38531  | No change |
| NM_025279    | Hnrnpk        | 0.168582 | 1 | 0.271347 | 71.1375  | 81.7357  | No change |
| NM_001001186 | Zfp456        | 0.168664 | 1 | 0.678353 | 1.19601  | 1.83041  | No change |
| NM_053157    | Tm2d1         | 0.168664 | 1 | 0.678353 | 4.94777  | 7.57227  | No change |
| NM_001111106 | Uba3          | 0.168788 | 1 | 0.3698   | 14.7746  | 18.1795  | No change |
| NM_207234    | Rexo4         | 0.168943 | 1 | 0.373464 | 15.0019  | 18.5064  | No change |
| NM_001137547 | Usp51         | 0.169194 | 1 | 0.822392 | 1.24064  | 2.10868  | No change |
| NM_019945    | Mast1         | 0.169194 | 1 | 0.822392 | 0.566379 | 0.962658 | No change |
| NM_175639    | Wdr43         | 0.169294 | 1 | 0.40479  | 7.39351  | 9.32242  | No change |
| NR_038016    | LOC100502920  | 0.169477 | 1 | 0.741886 | 3.05969  | 4.9028   | No change |
| NM_027777    | Pex1          | 0.169621 | 1 | 0.481942 | 3.2709   | 4.3535   | No change |
| NM_026141    | Ppil4         | 0.169646 | 1 | 0.376389 | 11.5513  | 14.2789  | No change |
| NM_008891    | Pnn           | 0.169849 | 1 | 0.336798 | 15.0074  | 18.046   | No change |
| NM_175133    | 1110038D17Rik | 0.169913 | 1 | 0.371653 | 12.0945  | 14.9009  | No change |

|              |               |          |   |          |          |          |           |
|--------------|---------------|----------|---|----------|----------|----------|-----------|
| NM_172293    | Fam113b       | 0.169984 | 1 | 0.502308 | 5.60711  | 7.57068  | No change |
| NM_080636    | Hars2         | 0.170032 | 1 | 0.507769 | 3.89206  | 5.2753   | No change |
| NM_172482    | Zfp719        | 0.170091 | 1 | 0.439959 | 3.83849  | 4.96052  | No change |
| NM_175537    | Zbtb38        | 0.17017  | 1 | 0.388612 | 7.29127  | 9.09013  | No change |
| NM_011682    | Utrn          | 0.17023  | 1 | 0.289467 | 8.38657  | 9.75805  | No change |
| NM_033604    | Rnf111        | 0.170271 | 1 | 0.355599 | 8.59737  | 10.4744  | No change |
| NM_021416    | Fam184b       | 0.170312 | 1 | 0.48783  | 3.29617  | 4.40532  | No change |
| NM_030084    | Gpr108        | 0.170433 | 1 | 0.351865 | 20.9345  | 25.4388  | No change |
| NM_001093757 | Ogfod1        | 0.170584 | 1 | 0.40696  | 4.882    | 6.16499  | No change |
| NM_019806    | Vapb          | 0.170811 | 1 | 0.353787 | 6.18026  | 7.52008  | No change |
| NM_177370    | Rhbdd3        | 0.171003 | 1 | 0.323395 | 34.4829  | 41.0797  | No change |
| NM_001007571 | D8Erttd738e   | 0.171155 | 1 | 0.361251 | 60.2037  | 73.6373  | No change |
| NM_001033305 | Ndufb6        | 0.171343 | 1 | 0.405841 | 48.1586  | 60.7669  | No change |
| NM_026546    | Fam173b       | 0.171469 | 1 | 0.623716 | 5.43916  | 8.00414  | No change |
| NM_029896    | Wdr82         | 0.172169 | 1 | 0.329631 | 13.6057  | 16.2791  | No change |
| NR_028449    | Hdac10        | 0.172336 | 1 | 0.511819 | 4.3542   | 5.91844  | No change |
| NM_001177370 | Nfk2          | 0.172354 | 1 | 0.714247 | 1.42996  | 2.24573  | No change |
| NM_001003950 | Rab3ip        | 0.172543 | 1 | 0.306964 | 30.183   | 35.5485  | No change |
| NM_194464    | Mrv1          | 0.172591 | 1 | 0.517854 | 1.94686  | 2.65756  | No change |
| NM_020497    | Zfp276        | 0.172666 | 1 | 0.396886 | 5.7875   | 7.25711  | No change |
| NM_019818    | Timm22        | 0.172695 | 1 | 0.469999 | 5.54967  | 7.32457  | No change |
| NM_009448    | Tuba1c        | 0.172708 | 1 | 0.257919 | 104.028  | 118.417  | No change |
| NM_025983    | Atp5e         | 0.172924 | 1 | 0.329023 | 144.268  | 172.541  | No change |
| NM_007531    | Phb2          | 0.172931 | 1 | 0.406164 | 19.1143  | 24.1239  | No change |
| NM_009330    | Hnf1b         | 0.172971 | 1 | 0.52432  | 3.9919   | 5.47403  | No change |
| NM_013548    | Hist1h3f      | 0.173112 | 1 | 0.731607 | 3.96062  | 6.29871  | No change |
| NM_028063    | Trmu          | 0.173112 | 1 | 0.731607 | 2.61349  | 4.15632  | No change |
| NM_001168505 | Shoc2         | 0.173158 | 1 | 0.352452 | 11.014   | 13.3892  | No change |
| NM_139064    | Trip2         | 0.173612 | 1 | 0.581248 | 4.0412   | 5.76957  | No change |
| NM_013777    | Akr1c12       | 0.173733 | 1 | 0.589883 | 6.17102  | 8.86452  | No change |
| NM_007454    | Ap1b1         | 0.173753 | 1 | 0.35593  | 11.0144  | 13.4221  | No change |
| NM_010818    | Cd200         | 0.173766 | 1 | 0.480218 | 6.23584  | 8.28946  | No change |
| NM_053169    | Trim16        | 0.173829 | 1 | 1.11385  | 0.304102 | 0.644939 | No change |
| NM_020575    | March7        | 0.174324 | 1 | 0.3206   | 25.0936  | 29.8359  | No change |
| NM_175095    | Commd2        | 0.174449 | 1 | 0.510115 | 4.07189  | 5.52798  | No change |
| NM_001039363 | Tsc2          | 0.174512 | 1 | 0.322412 | 11.0828  | 13.1939  | No change |
| NM_029391    | Rab4b         | 0.174535 | 1 | 0.447534 | 15.9639  | 20.7396  | No change |
| NM_007678    | Cebpa         | 0.174635 | 1 | 0.60955  | 2.61349  | 3.8071   | No change |
| NM_172993    | Zfp512        | 0.174682 | 1 | 0.461778 | 5.09433  | 6.68481  | No change |
| NM_024433    | Mtap          | 0.175073 | 1 | 0.522198 | 4.38646  | 6.00597  | No change |
| NM_007514    | Slc7a2        | 0.175078 | 1 | 0.445195 | 2.47452  | 3.20952  | No change |
| NM_001008422 | Scaf1         | 0.175188 | 1 | 0.448645 | 4.45488  | 5.79209  | No change |
| NM_030612    | Nfkbiz        | 0.175188 | 1 | 0.448645 | 4.82698  | 6.27589  | No change |
| NM_001039521 | Rrn3          | 0.175218 | 1 | 0.394966 | 8.1741   | 10.2359  | No change |
| NM_007842    | Dhx9          | 0.175305 | 1 | 0.288101 | 25.1698  | 29.258   | No change |
| NM_028871    | Hnrnp1        | 0.17556  | 1 | 0.339709 | 20.1133  | 24.2345  | No change |
| NM_027480    | Ankrd24       | 0.175574 | 1 | 0.584746 | 2.1529   | 3.08124  | No change |
| NM_133999    | Fig4          | 0.175614 | 1 | 0.361528 | 12.7511  | 15.5991  | No change |
| NM_175334    | Maml1         | 0.175765 | 1 | 0.479404 | 2.68629  | 3.56886  | No change |
| NM_026444    | Cs            | 0.175823 | 1 | 0.328423 | 22.1056  | 26.4266  | No change |
| NM_026472    | Mki67ip       | 0.175824 | 1 | 0.467492 | 8.57363  | 11.2955  | No change |
| NM_016898    | Cd164         | 0.176017 | 1 | 0.264846 | 66.7131  | 76.3064  | No change |
| NM_011633    | Traf5         | 0.176018 | 1 | 0.914546 | 1.00955  | 1.83724  | No change |
| NM_001163747 | Tmem192       | 0.17602  | 1 | 0.691831 | 4.78699  | 7.39665  | No change |
| NM_153127    | Mmrrn2        | 0.17602  | 1 | 0.691831 | 1.20466  | 1.86138  | No change |
| NM_146006    | Lss           | 0.176033 | 1 | 0.453431 | 5.81898  | 7.59105  | No change |
| NM_130879    | Usp48         | 0.176061 | 1 | 0.335743 | 9.90935  | 11.9069  | No change |
| NM_178912    | Fancm         | 0.176256 | 1 | 0.429357 | 2.81461  | 3.61032  | No change |
| NM_008692    | Nfyc          | 0.176275 | 1 | 0.457291 | 9.03427  | 11.8174  | No change |
| NM_025340    | Sharpin       | 0.176459 | 1 | 0.424336 | 13.1906  | 16.8603  | No change |
| NM_033563    | Klf7          | 0.17662  | 1 | 0.836321 | 2.0375   | 3.49806  | No change |
| NM_029519    | Rap2a         | 0.176861 | 1 | 0.477153 | 3.65838  | 4.8526   | No change |
| NM_009280    | Ss18          | 0.176916 | 1 | 0.324607 | 21.6156  | 25.7723  | No change |
| NM_133717    | Rab43         | 0.177322 | 1 | 0.359111 | 10.111   | 12.3484  | No change |
| NM_172257    | Sidt2         | 0.177324 | 1 | 0.293084 | 26.0709  | 30.4104  | No change |
| NM_172383    | Tmem125       | 0.1775   | 1 | 0.656648 | 2.99433  | 4.51103  | No change |
| NM_026720    | Ankrd13d      | 0.177536 | 1 | 0.565066 | 4.13405  | 5.83448  | No change |
| NM_031871    | Ghdc          | 0.177571 | 1 | 0.588297 | 3.61036  | 5.18011  | No change |
| NM_027885    | Smug1         | 0.177638 | 1 | 0.538542 | 2.85643  | 3.95636  | No change |
| NM_026160    | Map1lc3b      | 0.177677 | 1 | 0.330479 | 36.3934  | 43.5694  | No change |
| NM_178195    | Hist1h2bf     | 0.177718 | 1 | 0.478619 | 39.8768  | 52.9482  | No change |
| NR_015473    | 1700020l14Rik | 0.177831 | 1 | 0.399257 | 18.6718  | 23.4514  | No change |
| NM_001040072 | Nynrin        | 0.177883 | 1 | 0.740396 | 0.526481 | 0.842549 | No change |
| NM_172716    | Pcgf3         | 0.178068 | 1 | 0.463888 | 4.5391   | 5.96494  | No change |
| NM_008086    | Gas1          | 0.178133 | 1 | 0.552225 | 3.04948  | 4.26481  | No change |
| NM_009148    | Exoc4         | 0.178197 | 1 | 0.414909 | 6.78144  | 8.61105  | No change |

|              |               |          |   |          |          |          |           |
|--------------|---------------|----------|---|----------|----------|----------|-----------|
| NM_026386    | Snx2          | 0.178782 | 1 | 0.448274 | 9.52089  | 12.3753  | No change |
| NM_133964    | Dohh          | 0.178822 | 1 | 0.458151 | 12.3073  | 16.1082  | No change |
| NM_019772    | 1110004F10Rik | 0.179098 | 1 | 0.360692 | 31.1627  | 38.1005  | No change |
| NM_008343    | Igfbp3        | 0.17922  | 1 | 0.575435 | 3.45608  | 4.91356  | No change |
| NM_026521    | Zfp706        | 0.179324 | 1 | 0.361054 | 9.86146  | 12.06    | No change |
| NM_001163026 | Dnajc13       | 0.179431 | 1 | 0.301407 | 12.8394  | 15.0633  | No change |
| NM_001007577 | Tceanc        | 0.179603 | 1 | 0.591902 | 1.91152  | 2.74959  | No change |
| NM_001033171 | Klrg2         | 0.179603 | 1 | 0.591902 | 3.38997  | 4.87625  | No change |
| NM_172510    | Mfsd4         | 0.179609 | 1 | 0.524487 | 4.26745  | 5.85223  | No change |
| NM_025516    | Ergic3        | 0.179646 | 1 | 0.369316 | 30.7358  | 37.8051  | No change |
| NM_001161665 | Kif26b        | 0.179805 | 1 | 0.760974 | 0.489337 | 0.794877 | No change |
| NM_026738    | 1110007C09Rik | 0.179823 | 1 | 0.685397 | 6.15448  | 9.46498  | No change |
| NM_178016    | Pigk          | 0.179882 | 1 | 0.273416 | 34.8966  | 40.1528  | No change |
| NM_030024    | Prr15         | 0.180208 | 1 | 0.491278 | 10.2445  | 13.724   | No change |
| NM_001033528 | Usp36         | 0.180247 | 1 | 0.487072 | 2.59687  | 3.4686   | No change |
| NM_175344    | Ano6          | 0.180278 | 1 | 0.368977 | 8.17587  | 10.0539  | No change |
| NM_029934    | Mboat7        | 0.180339 | 1 | 0.483089 | 5.20277  | 6.92982  | No change |
| NM_027166    | Ypel5         | 0.180495 | 1 | 0.336488 | 20.7937  | 24.998   | No change |
| NM_026086    | Nanp          | 0.180622 | 1 | 0.629978 | 4.66309  | 6.89193  | No change |
| NM_026010    | Lipt2         | 0.180632 | 1 | 0.662291 | 4.47986  | 6.77604  | No change |
| NM_133626    | Rrbp1         | 0.180842 | 1 | 0.329882 | 24.3537  | 29.1434  | No change |
| NM_011263    | Rest          | 0.181108 | 1 | 0.359105 | 10.6516  | 13.0085  | No change |
| NM_198127    | Abi2          | 0.18116  | 1 | 0.346516 | 9.16282  | 11.0926  | No change |
| NM_011657    | Tulp3         | 0.18128  | 1 | 0.586791 | 2.37543  | 3.40443  | No change |
| NM_001110512 | Mettl8        | 0.181555 | 1 | 0.522437 | 6.11277  | 8.37059  | No change |
| NM_008983    | Ptprk         | 0.181555 | 1 | 0.522437 | 1.8842   | 2.58015  | No change |
| NM_009423    | Traf4         | 0.181555 | 1 | 0.522437 | 3.85899  | 5.28435  | No change |
| NM_025381    | Atp6v1f       | 0.181609 | 1 | 0.356501 | 74.1928  | 90.4453  | No change |
| NM_025296    | Ciao1         | 0.18161  | 1 | 0.390695 | 10.5843  | 13.2142  | No change |
| NM_175098    | Ccdc126       | 0.181864 | 1 | 0.622466 | 2.94607  | 4.33085  | No change |
| NM_029573    | Idh3a         | 0.181902 | 1 | 0.470376 | 6.89972  | 9.10826  | No change |
| NM_019635    | Stk3          | 0.181905 | 1 | 0.389489 | 11.3481  | 14.156   | No change |
| NM_007927    | Emd           | 0.181965 | 1 | 0.546082 | 7.75555  | 10.7989  | No change |
| NM_025948    | Lsm14a        | 0.182109 | 1 | 0.37601  | 13.9744  | 17.2689  | No change |
| NM_001083616 | Cacna1d       | 0.182192 | 1 | 0.337438 | 6.64328  | 7.99174  | No change |
| NM_201529    | Lmo7          | 0.182267 | 1 | 0.51843  | 1.96382  | 2.68158  | No change |
| NM_009899    | Clca1         | 0.18233  | 1 | 0.478551 | 5.18892  | 6.88927  | No change |
| NM_177368    | Tmtc2         | 0.182776 | 1 | 0.427221 | 4.14078  | 5.30332  | No change |
| NM_001128605 | Psen2         | 0.182805 | 1 | 0.56722  | 4.50195  | 6.36305  | No change |
| NM_001145978 | Parp4         | 0.182921 | 1 | 0.560601 | 1.46125  | 2.05566  | No change |
| NM_007383    | Acads         | 0.183041 | 1 | 0.49183  | 7.81532  | 10.4738  | No change |
| NM_028596    | Fbrs1         | 0.183084 | 1 | 0.483726 | 4.03427  | 5.37574  | No change |
| NM_144829    | Aarsd1        | 0.183283 | 1 | 0.428056 | 17.567   | 22.5121  | No change |
| NM_019632    | Napb          | 0.183525 | 1 | 0.679452 | 1.3965   | 2.13837  | No change |
| NM_001195421 | Hist1h4m      | 0.183567 | 1 | 0.392156 | 80.7061  | 100.862  | No change |
| NM_029886    | 9430038I01Rik | 0.183753 | 1 | 1.07733  | 1.17704  | 2.42494  | No change |
| NM_153555    | Dcaf8         | 0.183921 | 1 | 0.300352 | 28.9906  | 33.9871  | No change |
| NM_022997    | Vps35         | 0.183968 | 1 | 0.282108 | 48.5146  | 56.1596  | No change |
| NM_172053    | Adamts16      | 0.184114 | 1 | 0.874667 | 0.490401 | 0.865995 | No change |
| NM_001082532 | Pigyl         | 0.184269 | 1 | 0.53817  | 15.5321  | 21.5061  | No change |
| NM_001103179 | Brwd1         | 0.184342 | 1 | 0.258019 | 36.4579  | 41.5031  | No change |
| NM_032396    | Kremen1       | 0.184395 | 1 | 0.371563 | 8.33702  | 10.2705  | No change |
| NM_028065    | Cnpy3         | 0.184739 | 1 | 0.408521 | 14.8713  | 18.7988  | No change |
| NM_023311    | Yipf5         | 0.184948 | 1 | 0.365121 | 19.0017  | 23.3036  | No change |
| NM_172591    | Fcho2         | 0.184948 | 1 | 0.365121 | 8.64525  | 10.6025  | No change |
| NM_207207    | Mrps26        | 0.184951 | 1 | 0.55126  | 10.3598  | 14.4776  | No change |
| NM_025314    | Dtd1          | 0.185295 | 1 | 0.593848 | 6.13819  | 8.84098  | No change |
| NM_173370    | Cds1          | 0.185298 | 1 | 0.322641 | 19.7446  | 23.5089  | No change |
| NM_028399    | Ccnt2         | 0.185562 | 1 | 0.387368 | 9.95613  | 12.401   | No change |
| NM_172488    | 9030625A04Rik | 0.185567 | 1 | 0.619746 | 2.85225  | 4.18459  | No change |
| NM_201518    | Flrt2         | 0.185813 | 1 | 0.492366 | 2.05239  | 2.75146  | No change |
| NM_019502    | Fxc1          | 0.185929 | 1 | 0.603058 | 7.54949  | 10.9451  | No change |
| NM_144825    | Taok1         | 0.18641  | 1 | 0.260913 | 21.6622  | 24.7094  | No change |
| NM_008031    | Fmr1          | 0.186438 | 1 | 0.398442 | 7.18664  | 9.02086  | No change |
| NM_028543    | Zfp763        | 0.186701 | 1 | 0.511334 | 3.80892  | 5.17489  | No change |
| NM_001010825 | Ficd          | 0.186754 | 1 | 0.493959 | 4.58593  | 6.15481  | No change |
| NM_008608    | Mmp14         | 0.186781 | 1 | 0.449646 | 7.75559  | 10.09    | No change |
| NM_027875    | Syde1         | 0.187041 | 1 | 0.685761 | 1.54732  | 2.37993  | No change |
| NM_011307    | Uimc1         | 0.187071 | 1 | 0.373241 | 14.1003  | 17.3905  | No change |
| NM_001199177 | Opa1          | 0.187072 | 1 | 0.388249 | 5.86387  | 7.30828  | No change |
| NM_001164672 | Dnaja1        | 0.187084 | 1 | 0.297977 | 21.845   | 25.5676  | No change |
| NM_145632    | Polr2h        | 0.187132 | 1 | 0.673943 | 6.81875  | 10.3992  | No change |
| NM_010956    | Ogdh          | 0.187337 | 1 | 0.322225 | 12.1283  | 14.4363  | No change |
| NM_199149    | Lrrc68        | 0.187387 | 1 | 0.343735 | 19.9391  | 24.0914  | No change |
| NM_181277    | Col14a1       | 0.187531 | 1 | 0.487313 | 2.36705  | 3.16201  | No change |
| NM_025938    | Rpp14         | 0.187696 | 1 | 0.52266  | 4.88726  | 6.69312  | No change |

|              |               |          |   |          |         |         |           |
|--------------|---------------|----------|---|----------|---------|---------|-----------|
| NM_001081080 | Phf3          | 0.187889 | 1 | 0.302667 | 14.7571 | 17.3282 | No change |
| NM_001122895 | Nab2          | 0.188001 | 1 | 0.435783 | 9.5634  | 12.3217 | No change |
| NM_001081251 | Pbrm1         | 0.188139 | 1 | 0.319126 | 10.4921 | 12.4619 | No change |
| NM_029736    | Slc10a7       | 0.188297 | 1 | 0.518782 | 3.41745 | 4.6674  | No change |
| NM_021322    | Wdr4          | 0.188425 | 1 | 0.488815 | 3.90567 | 5.22284 | No change |
| NM_001012330 | Zfp238        | 0.188581 | 1 | 0.311265 | 25.3544 | 29.9503 | No change |
| NM_011010    | Omp           | 0.188799 | 1 | 0.592218 | 3.86998 | 5.56732 | No change |
| NM_024272    | Ssbp2         | 0.188799 | 1 | 0.592218 | 1.2146  | 1.74732 | No change |
| NR_030729    | Gm3434        | 0.188984 | 1 | 0.729514 | 10.2194 | 16.222  | No change |
| NM_019983    | Rabgef1       | 0.189201 | 1 | 0.535556 | 3.9945  | 5.52042 | No change |
| NM_133847    | Tm9sf4        | 0.189235 | 1 | 0.419791 | 6.79931 | 8.66284 | No change |
| NM_009169    | Shfm1         | 0.189332 | 1 | 0.341265 | 127.889 | 154.256 | No change |
| NM_030730    | Rad54l2       | 0.189515 | 1 | 0.33073  | 7.8242  | 9.36839 | No change |
| NM_172631    | D18Erd653e    | 0.18959  | 1 | 0.559266 | 3.91376 | 5.50023 | No change |
| NR_015585    | 4933439C10Rik | 0.18959  | 1 | 0.559266 | 5.19819 | 7.30531 | No change |
| NM_021551    | Slc22a17      | 0.189645 | 1 | 0.498817 | 6.22801 | 8.38709 | No change |
| NM_011365    | Itsn2         | 0.189695 | 1 | 0.374884 | 6.97046 | 8.60677 | No change |
| NM_026137    | Wdr13         | 0.189799 | 1 | 0.341967 | 14.7848 | 17.8417 | No change |
| NM_001038846 | Rcsd1         | 0.189916 | 1 | 0.547875 | 4.05192 | 5.64867 | No change |
| NM_001042523 | Txnrd1        | 0.189937 | 1 | 0.377714 | 11.1616 | 13.809  | No change |
| NM_023740    | Zdhhc16       | 0.190122 | 1 | 0.526794 | 6.48395 | 8.90552 | No change |
| NM_008536    | Tm4sf1        | 0.190346 | 1 | 0.610793 | 3.88404 | 5.66175 | No change |
| NM_027289    | Nt5dc2        | 0.190508 | 1 | 0.679958 | 3.7565  | 5.75346 | No change |
| NM_175308    | Mobk2c        | 0.190532 | 1 | 0.537825 | 3.86914 | 5.35568 | No change |
| NM_029763    | Polr3f        | 0.190572 | 1 | 0.437531 | 5.51177 | 7.11007 | No change |
| NM_182930    | Plekha6       | 0.190758 | 1 | 0.33382  | 9.6008  | 11.5203 | No change |
| NM_001031664 | Nudt10        | 0.190779 | 1 | 0.973677 | 1.03544 | 1.96912 | No change |
| NM_133979    | Ano10         | 0.190849 | 1 | 0.330292 | 28.7996 | 34.4729 | No change |
| NM_008562    | Mcl1          | 0.19095  | 1 | 0.316477 | 26.6144 | 31.5526 | No change |
| NM_031403    | Dbr1          | 0.191    | 1 | 0.65866  | 2.78374 | 4.1989  | No change |
| NM_001167995 | Trmt2b        | 0.191143 | 1 | 0.70577  | 5.73743 | 8.95214 | No change |
| NM_153798    | Polr2b        | 0.19128  | 1 | 0.349626 | 15.1196 | 18.3432 | No change |
| NM_145139    | Eif3l         | 0.191932 | 1 | 0.341556 | 34.2022 | 41.2618 | No change |
| NM_172865    | Manea         | 0.19207  | 1 | 0.397648 | 7.25843 | 9.10573 | No change |
| NM_001130169 | Zfp207        | 0.19221  | 1 | 0.316084 | 40.3641 | 47.8404 | No change |
| NM_001038018 | Grk6          | 0.192223 | 1 | 0.535435 | 3.81242 | 5.26818 | No change |
| NM_013895    | Timm13        | 0.192565 | 1 | 0.429357 | 20.4243 | 26.1964 | No change |
| NM_001190445 | 2610002J02Rik | 0.192615 | 1 | 0.614753 | 6.80089 | 9.94131 | No change |
| NM_030687    | Slco1a4       | 0.192615 | 1 | 0.614753 | 1.91414 | 2.79803 | No change |
| NM_028811    | Elp3          | 0.192833 | 1 | 0.346516 | 22.5055 | 27.2447 | No change |
| NM_138651    | Cds2          | 0.192833 | 1 | 0.335643 | 8.60427 | 10.3376 | No change |
| NM_175025    | Atp2c1        | 0.192833 | 1 | 0.335643 | 14.6677 | 17.6225 | No change |
| NR_015572    | 1810014B01Rik | 0.192854 | 1 | 0.843766 | 1.72081 | 2.96913 | No change |
| NM_078477    | Kif16         | 0.192864 | 1 | 0.599282 | 2.99585 | 4.33128 | No change |
| NM_026476    | 2610101N10Rik | 0.192928 | 1 | 0.316261 | 12.6481 | 14.9926 | No change |
| NR_002688    | Gm13363       | 0.192968 | 1 | 0.335844 | 25.5591 | 30.7123 | No change |
| NM_001001187 | Zfp738        | 0.19298  | 1 | 0.412346 | 6.51437 | 8.2566  | No change |
| NM_178045    | Rassf4        | 0.193034 | 1 | 0.496509 | 2.33994 | 3.14595 | No change |
| NM_029895    | Etl4          | 0.193383 | 1 | 0.412987 | 4.95364 | 6.28125 | No change |
| NM_025876    | Cdk5rap1      | 0.193522 | 1 | 0.522869 | 6.33251 | 8.67322 | No change |
| NM_172413    | Rap2c         | 0.193651 | 1 | 0.466787 | 5.23238 | 6.88934 | No change |
| NM_177893    | Fan1          | 0.193884 | 1 | 0.533154 | 3.36933 | 4.64834 | No change |
| NM_029723    | Dapl1         | 0.193947 | 1 | 0.625568 | 12.1416 | 17.8852 | No change |
| NM_175130    | Trpm4         | 0.19404  | 1 | 0.394799 | 8.30733 | 10.4008 | No change |
| NM_001127191 | Snx16         | 0.194054 | 1 | 0.664052 | 2.28276 | 3.45639 | No change |
| NM_001190805 | Dnajb11       | 0.194153 | 1 | 0.419745 | 16.9951 | 21.6519 | No change |
| NM_027852    | Rarres2       | 0.19418  | 1 | 0.477071 | 24.3138 | 32.2451 | No change |
| NM_024273    | 4930455C21Rik | 0.194236 | 1 | 0.483877 | 7.88533 | 10.5077 | No change |
| NM_024256    | B3gat3        | 0.194369 | 1 | 0.467963 | 11.6595 | 15.3644 | No change |
| NM_026566    | 9430023L20Rik | 0.194453 | 1 | 0.549954 | 8.61246 | 12.0235 | No change |
| NM_018821    | Socs6         | 0.194758 | 1 | 0.441909 | 7.12127 | 9.21429 | No change |
| NM_173747    | Gpkow         | 0.195076 | 1 | 0.485265 | 4.56427 | 6.08807 | No change |
| NM_133831    | Gltscr2       | 0.195089 | 1 | 0.349144 | 39.1211 | 47.4457 | No change |
| NM_146179    | Zfp418        | 0.195099 | 1 | 0.807193 | 1.18736 | 1.99419 | No change |
| NM_007598    | Cap1          | 0.195101 | 1 | 0.306713 | 49.2481 | 57.9908 | No change |
| NM_011970    | Psmb2         | 0.195135 | 1 | 0.41053  | 35.9573 | 45.5156 | No change |
| NM_138606    | Pim2          | 0.195135 | 1 | 0.712892 | 2.28781 | 3.58779 | No change |
| NM_010879    | Nck2          | 0.19536  | 1 | 0.380081 | 15.0939 | 18.7045 | No change |
| NM_178640    | B3galnt2      | 0.195497 | 1 | 0.390186 | 10.205  | 12.7355 | No change |
| NM_001135657 | Ptprj         | 0.195514 | 1 | 0.346888 | 15.0302 | 18.1998 | No change |
| NM_001081309 | Pik3r4        | 0.195573 | 1 | 0.436614 | 4.9373  | 6.36476 | No change |
| NM_026346    | Fbxo32        | 0.19577  | 1 | 0.473315 | 6.58012 | 8.70353 | No change |
| NM_026780    | Syf2          | 0.195829 | 1 | 0.456178 | 16.0578 | 20.9859 | No change |
| NM_008986    | Ptrf          | 0.195871 | 1 | 0.443703 | 7.06245 | 9.14961 | No change |
| NM_021310    | Jmy           | 0.195963 | 1 | 0.334912 | 8.57271 | 10.2944 | No change |
| NM_017368    | Celf1         | 0.196038 | 1 | 0.453882 | 8.96564 | 11.6984 | No change |



|                |               |          |   |          |          |          |           |
|----------------|---------------|----------|---|----------|----------|----------|-----------|
| NM_011354      | Serf2         | 0.196092 | 1 | 0.290662 | 54.5073  | 63.4718  | No change |
| NM_026046      | Zfp329        | 0.196249 | 1 | 0.392681 | 4.64737  | 5.80988  | No change |
| NM_030205      | Coro7         | 0.196281 | 1 | 0.494365 | 4.41575  | 5.92769  | No change |
| NM_183300      | Zfyve9        | 0.196328 | 1 | 0.522967 | 5.84521  | 8.00618  | No change |
| NM_029792      | B3gat1        | 0.196386 | 1 | 0.728565 | 1.28157  | 2.03261  | No change |
| NM_178267      | Zfp827        | 0.196463 | 1 | 0.537505 | 1.52144  | 2.10539  | No change |
| NM_026774      | Hbxip         | 0.19647  | 1 | 0.440032 | 26.6775  | 34.4727  | No change |
| NM_025898      | Napa          | 0.196647 | 1 | 0.358511 | 23.5796  | 28.7841  | No change |
| NM_011218      | Ptprs         | 0.196743 | 1 | 0.321738 | 13.6256  | 16.2129  | No change |
| NM_145700      | Ccrl1         | 0.196785 | 1 | 0.519268 | 6.17951  | 8.44199  | No change |
| NM_178143      | Prkaa2        | 0.197182 | 1 | 0.669553 | 0.696844 | 1.05923  | No change |
| NM_001177721   | Madd          | 0.197326 | 1 | 0.405881 | 5.38851  | 6.79875  | No change |
| NM_177684      | Zfp637        | 0.197415 | 1 | 0.592508 | 7.6732   | 11.0397  | No change |
| NM_179203      | Atad3a        | 0.197417 | 1 | 0.560655 | 4.17754  | 5.87624  | No change |
| NM_001123382   | Il1r1         | 0.197623 | 1 | 0.461778 | 4.13113  | 5.42016  | No change |
| NM_001172112   | Dhrs7b        | 0.197778 | 1 | 0.539715 | 7.26886  | 10.0743  | No change |
| NM_134105      | Txndc11       | 0.197781 | 1 | 0.512404 | 11.2537  | 15.2997  | No change |
| NM_001163661   | Telo2         | 0.197783 | 1 | 0.573286 | 2.66456  | 3.78168  | No change |
| NM_009271      | Src           | 0.198047 | 1 | 0.473966 | 4.66174  | 6.16882  | No change |
| NM_007738      | Col7a1        | 0.19817  | 1 | 0.705575 | 0.530388 | 0.827337 | No change |
| NM_015775      | Tmprss2       | 0.19817  | 1 | 0.705575 | 1.54334  | 2.40742  | No change |
| NM_026072      | Cwc27         | 0.198201 | 1 | 0.483663 | 8.95207  | 11.9271  | No change |
| NM_023275      | Rhoj          | 0.198237 | 1 | 0.746123 | 1.7438   | 2.801    | No change |
| NM_001162855   | Nsmce4a       | 0.198443 | 1 | 0.400217 | 24.2833  | 30.5174  | No change |
| NM_181072      | Myo1e         | 0.198456 | 1 | 0.501671 | 3.00255  | 4.05131  | No change |
| NM_007896      | Mapre1        | 0.198554 | 1 | 0.32476  | 12.4985  | 14.903   | No change |
| NM_172302      | Cpsf7         | 0.198584 | 1 | 0.385017 | 11.3899  | 14.163   | No change |
| NM_024475      | Ublcp1        | 0.198798 | 1 | 0.4722   | 8.63827  | 11.4167  | No change |
| NM_009677      | Ap1g1         | 0.198954 | 1 | 0.446301 | 6.43047  | 8.3459   | No change |
| NM_029780      | Raf1          | 0.198967 | 1 | 0.338161 | 24.4357  | 29.4095  | No change |
| NM_022315      | Smoc2         | 0.199024 | 1 | 0.48501  | 5.93079  | 7.90917  | No change |
| NM_025395      | Chchd5        | 0.199237 | 1 | 0.610281 | 5.94156  | 8.65682  | No change |
| NM_054051      | Pip4k2b       | 0.199453 | 1 | 0.442556 | 4.67562  | 6.05244  | No change |
| NM_011550      | Mix           | 0.199876 | 1 | 0.528892 | 6.31647  | 8.68762  | No change |
| NM_133940      | Fbxl14        | 0.199889 | 1 | 0.450138 | 5.26951  | 6.85749  | No change |
| NM_022886      | Scel          | 0.200384 | 1 | 0.675166 | 1.84904  | 2.82179  | No change |
| NM_133705      | Pycr2         | 0.200398 | 1 | 0.504875 | 9.1965   | 12.4366  | No change |
| NM_175432      | Tmem132c      | 0.200652 | 1 | 0.858016 | 0.531591 | 0.926697 | No change |
| NM_001033262   | March9        | 0.200886 | 1 | 0.837337 | 1.46502  | 2.5152   | No change |
| NM_001024205   | Nufip2        | 0.200891 | 1 | 0.304658 | 13.1223  | 15.4296  | No change |
| NM_026695      | Etfb          | 0.201178 | 1 | 0.495284 | 19.4114  | 26.0738  | No change |
| NM_145964      | Ap1ar         | 0.201248 | 1 | 0.449962 | 9.41875  | 12.2555  | No change |
| NM_001170345_2 | Gm2058        | 0.201343 | 1 | 0.42374  | 9.63889  | 12.314   | No change |
| NM_007742      | Col1a1        | 0.201437 | 1 | 0.61406  | 1.63181  | 2.38386  | No change |
| NR_033336      | Snora23       | 0.201778 | 1 | 0.586443 | 48.482   | 69.45    | No change |
| NM_172698      | 4732418C07Rik | 0.201803 | 1 | 0.408302 | 7.71485  | 9.75022  | No change |
| NM_134080      | Flnb          | 0.202165 | 1 | 0.334015 | 9.22474  | 11.0703  | No change |
| NM_007783      | Csk           | 0.202172 | 1 | 0.486898 | 7.44085  | 9.93592  | No change |
| NM_133701      | Prpf6         | 0.202293 | 1 | 0.403361 | 11.4748  | 14.4522  | No change |
| NM_134123      | Scaf8         | 0.202406 | 1 | 0.400827 | 7.39406  | 9.29614  | No change |
| NM_176902      | Fam100b       | 0.202572 | 1 | 0.438985 | 16.8824  | 21.7989  | No change |
| NM_013692      | Klf10         | 0.202657 | 1 | 0.481445 | 5.81347  | 7.73315  | No change |
| NM_001167669   | Spag7         | 0.202667 | 1 | 0.431291 | 23.7239  | 30.4683  | No change |
| NM_177815      | Rft1          | 0.202877 | 1 | 0.505213 | 6.29826  | 8.51911  | No change |
| NM_138589      | Ubfd1         | 0.202928 | 1 | 0.3722   | 10.358   | 12.7652  | No change |
| NM_009131      | Clec11a       | 0.202996 | 1 | 0.582134 | 4.7032   | 6.71664  | No change |
| NM_011700      | Vill          | 0.203092 | 1 | 0.754774 | 1.51791  | 2.45324  | No change |
| NM_016665      | Stra13        | 0.203215 | 1 | 0.476425 | 29.0387  | 38.4917  | No change |
| NM_011135      | Cnot7         | 0.203359 | 1 | 0.340721 | 25.7784  | 31.0805  | No change |
| NM_011400      | Slc2a1        | 0.203404 | 1 | 0.602741 | 3.19742  | 4.63348  | No change |
| NM_013630      | Pkd1          | 0.203434 | 1 | 0.316442 | 8.08576  | 9.58564  | No change |
| NM_009725      | Atp5f1        | 0.203871 | 1 | 0.351816 | 45.3291  | 55.0759  | No change |
| NM_133887      | Stx12         | 0.20451  | 1 | 0.352745 | 28.3278  | 34.4411  | No change |
| NM_177323      | Rint1         | 0.20462  | 1 | 0.475831 | 5.74193  | 7.60786  | No change |
| NM_053162      | Mrpl34        | 0.204641 | 1 | 0.635552 | 10.7884  | 16.0029  | No change |
| NM_178635      | Uvrag         | 0.204902 | 1 | 0.429292 | 8.10854  | 10.399   | No change |
| NM_080557      | Snx4          | 0.205124 | 1 | 0.413415 | 13.3278  | 16.9041  | No change |
| NM_001159908   | Zfand2a       | 0.205269 | 1 | 0.488753 | 5.51689  | 7.37626  | No change |
| NM_001159393   | Irf1          | 0.20543  | 1 | 0.744621 | 1.99684  | 3.20345  | No change |
| NM_031182      | Tcfap4        | 0.205656 | 1 | 0.941018 | 0.989488 | 1.8347   | No change |
| NM_028493      | Rhobtb3       | 0.205691 | 1 | 0.37113  | 10.6156  | 13.0727  | No change |
| NM_001164147   | Tcf3          | 0.205853 | 1 | 0.486607 | 5.24796  | 7.00611  | No change |
| NM_001033140   | Sdhaf1        | 0.205955 | 1 | 0.621795 | 7.7837   | 11.4331  | No change |
| NM_145597      | Tmem161a      | 0.205981 | 1 | 0.543668 | 3.9339   | 5.46705  | No change |
| NM_019721      | Mettl3        | 0.206253 | 1 | 0.481311 | 9.00488  | 11.977   | No change |
| NM_183275      | 1110002N22Rik | 0.206638 | 1 | 0.675734 | 4.49457  | 6.86114  | No change |

|              |               |          |   |          |          |          |           |
|--------------|---------------|----------|---|----------|----------|----------|-----------|
| NM_001081124 | Mtap7d2       | 0.206807 | 1 | 0.647833 | 1.71791  | 2.57062  | No change |
| NM_027192    | Til           | 0.207021 | 1 | 0.686744 | 1.20687  | 1.85693  | No change |
| NM_175687    | A230050P20Rik | 0.20713  | 1 | 0.577029 | 5.75598  | 8.19006  | No change |
| NM_001160016 | Gnb1          | 0.20714  | 1 | 0.3242   | 33.9143  | 40.4224  | No change |
| NM_008048    | Igfbp7        | 0.207171 | 1 | 0.35173  | 61.728   | 74.9959  | No change |
| NM_176973    | Podxl2        | 0.207188 | 1 | 0.639924 | 3.4498   | 5.13305  | No change |
| NM_001195268 | Dos           | 0.207236 | 1 | 0.485824 | 5.98445  | 7.98486  | No change |
| NM_146040    | Cdca7l        | 0.207338 | 1 | 0.550719 | 4.3508   | 6.07652  | No change |
| NM_001013580 | Pard3         | 0.207426 | 1 | 0.596007 | 2.40056  | 3.46195  | No change |
| NR_037958    | 1300002E11Rik | 0.207646 | 1 | 1.07909  | 2.37051  | 4.88374  | No change |
| NM_001037916 | Ccdc17        | 0.207707 | 1 | 0.698817 | 2.60957  | 4.05011  | No change |
| NM_001159551 | H13           | 0.207915 | 1 | 0.392409 | 7.74079  | 9.6749   | No change |
| NM_010478    | Hspa1b        | 0.208212 | 1 | 0.41104  | 12.2273  | 15.4823  | No change |
| NM_026654    | Toe1          | 0.208268 | 1 | 0.372476 | 26.4819  | 32.642   | No change |
| NM_009380    | Thrb          | 0.208279 | 1 | 0.625754 | 1.2259   | 1.80569  | No change |
| NM_001099319 | Gm12942       | 0.208312 | 1 | 0.573286 | 8.89829  | 12.6275  | No change |
| NM_001167898 | Frem3         | 0.208534 | 1 | 0.831455 | 0.462796 | 0.790936 | No change |
| NM_176920    | Lrtm1         | 0.208534 | 1 | 0.831455 | 0.419034 | 0.716144 | No change |
| NM_001177868 | Rreb1         | 0.208678 | 1 | 0.474149 | 2.7264   | 3.60804  | No change |
| NM_001164565 | Acnat1        | 0.20882  | 1 | 0.872847 | 0.52463  | 0.924408 | No change |
| NM_177911    | Tgm4          | 0.20882  | 1 | 0.872847 | 0.957113 | 1.68645  | No change |
| NM_009849    | Entpd2        | 0.209236 | 1 | 0.814295 | 1.69105  | 2.85385  | No change |
| NM_013534    | Leprel2       | 0.209236 | 1 | 0.814295 | 1.17869  | 1.98917  | No change |
| NM_153058    | Mapre2        | 0.20924  | 1 | 0.511939 | 3.67077  | 4.98844  | No change |
| NM_172285    | Plcg2         | 0.209495 | 1 | 0.586924 | 2.15662  | 3.09012  | No change |
| NM_029885    | Gabpb2        | 0.209678 | 1 | 0.35475  | 7.89613  | 9.61346  | No change |
| NM_024193    | Nop56         | 0.209826 | 1 | 0.456743 | 12.0262  | 15.722   | No change |
| NM_019425    | Gnpnat1       | 0.209911 | 1 | 0.41783  | 12.8613  | 16.3625  | No change |
| NM_146236    | Tceal1        | 0.209949 | 1 | 0.545571 | 10.7559  | 14.9673  | No change |
| NM_183308    | Pon2          | 0.210015 | 1 | 0.413784 | 18.3839  | 23.3224  | No change |
| NM_053144    | Pcdhb19       | 0.210201 | 1 | 0.898126 | 0.517449 | 0.928988 | No change |
| NM_023739    | Nfx1          | 0.210271 | 1 | 0.377874 | 11.1821  | 13.835   | No change |
| NM_001162924 | Pkp3          | 0.210325 | 1 | 0.594481 | 3.06764  | 4.41905  | No change |
| NM_172998    | Rnft2         | 0.210325 | 1 | 0.594481 | 2.03622  | 2.93325  | No change |
| NM_001200002 | Tmppe         | 0.210362 | 1 | 0.560701 | 1.58578  | 2.23038  | No change |
| NM_001037914 | Gm6320        | 0.210386 | 1 | 1.56131  | 0.296062 | 0.884426 | No change |
| NR_033215    | 3000002C10Rik | 0.210464 | 1 | 0.692717 | 4.25356  | 6.57241  | No change |
| NM_001177771 | Clcc1         | 0.21047  | 1 | 0.482394 | 8.28496  | 11.0276  | No change |
| NM_145465    | Stk24         | 0.21047  | 1 | 0.41585  | 12.9964  | 16.5114  | No change |
| NM_019661    | Ykt6          | 0.210527 | 1 | 0.381683 | 19.7032  | 24.4426  | No change |
| NM_153545    | Lrrc45        | 0.211274 | 1 | 0.547751 | 4.81031  | 6.70399  | No change |
| NM_033617    | Atp6v0b       | 0.211281 | 1 | 0.378524 | 51.3601  | 63.5739  | No change |
| NM_027446    | Fam86         | 0.211332 | 1 | 0.441074 | 12.3754  | 16.002   | No change |
| NM_021710    | Ap4s1         | 0.211341 | 1 | 0.602602 | 7.70192  | 11.1589  | No change |
| NM_145361    | Btbd2         | 0.211449 | 1 | 0.446899 | 8.31433  | 10.7947  | No change |
| NM_020590    | Gabarapl1     | 0.211548 | 1 | 0.341411 | 48.506   | 58.5098  | No change |
| NM_001039089 | Sei1l         | 0.21156  | 1 | 0.327029 | 17.3569  | 20.7282  | No change |
| NM_025616    | Timm50        | 0.211597 | 1 | 0.527051 | 11.5268  | 15.8318  | No change |
| NR_003376    | Gm7367        | 0.211681 | 1 | 0.455342 | 18.0129  | 23.5253  | No change |
| NM_026885    | Chmp2a        | 0.211814 | 1 | 0.336865 | 100.216  | 120.504  | No change |
| NM_001102404 | Acp5          | 0.212306 | 1 | 0.743211 | 3.1228   | 5.00392  | No change |
| NM_177190    | Tcp11l1       | 0.212329 | 1 | 0.657298 | 1.84551  | 2.78006  | No change |
| NM_001079844 | Gpc6          | 0.212397 | 1 | 0.666396 | 0.917284 | 1.3908   | No change |
| NM_001195633 | 5430411K18Rik | 0.212476 | 1 | 0.376262 | 5.51952  | 6.82133  | No change |
| NM_028360    | Ttc19         | 0.212567 | 1 | 0.497381 | 4.93293  | 6.63526  | No change |
| NM_029447    | Nln           | 0.212769 | 1 | 0.437962 | 7.30116  | 9.42019  | No change |
| NM_183390    | Klhl6         | 0.212889 | 1 | 1.04972  | 0.637524 | 1.28358  | No change |
| NM_026553    | Yif1a         | 0.213447 | 1 | 0.492805 | 11.7633  | 15.7719  | No change |
| NM_011163    | Eif2ak2       | 0.213459 | 1 | 0.411159 | 8.36122  | 10.5878  | No change |
| NM_001012667 | Al316807      | 0.213522 | 1 | 0.627116 | 5.20667  | 7.67607  | No change |
| NM_030215    | Wrnip1        | 0.213875 | 1 | 0.53075  | 5.09112  | 7.01062  | No change |
| NM_178056    | Tm2d3         | 0.213976 | 1 | 0.552179 | 11.6734  | 16.3194  | No change |
| NM_008047    | Fstl1         | 0.214045 | 1 | 0.454892 | 6.64294  | 8.673    | No change |
| NM_178394    | Jakmip1       | 0.214077 | 1 | 0.620815 | 3.30617  | 4.85237  | No change |
| NM_025788    | Nacc1         | 0.214155 | 1 | 0.369294 | 13.8609  | 17.047   | No change |
| NM_011756    | Zfp36         | 0.21435  | 1 | 0.577802 | 5.686    | 8.09428  | No change |
| NM_029928    | Ptprb         | 0.214499 | 1 | 0.506769 | 1.3398   | 1.81406  | No change |
| NM_001079908 | Fgfr1         | 0.214703 | 1 | 0.614916 | 1.63016  | 2.38251  | No change |
| NM_001162921 | Zc3h12c       | 0.214822 | 1 | 0.439394 | 4.52271  | 5.84114  | No change |
| NM_016661    | Ahcy          | 0.214822 | 1 | 0.439394 | 10.9161  | 14.0983  | No change |
| NM_001002008 | Zfp948        | 0.21514  | 1 | 0.653493 | 2.57625  | 3.87013  | No change |
| NM_023418    | Pgam1         | 0.215141 | 1 | 0.369382 | 32.9444  | 40.5196  | No change |
| NM_177596    | Zfp947        | 0.215161 | 1 | 0.711756 | 1.91335  | 2.99692  | No change |
| NM_007406    | Adcy7         | 0.215273 | 1 | 0.421743 | 5.3969   | 6.88471  | No change |
| NM_134112    | Kctd1         | 0.215388 | 1 | 0.574166 | 5.82085  | 8.26487  | No change |
| NM_138679    | Ash1l         | 0.215619 | 1 | 0.324725 | 10.8775  | 12.9695  | No change |

|              |               |          |   |          |          |          |           |
|--------------|---------------|----------|---|----------|----------|----------|-----------|
| NM_201610    | Neil2         | 0.215683 | 1 | 0.844248 | 1.56572  | 2.7006   | No change |
| NM_147778    | Commmd3       | 0.215985 | 1 | 0.44643  | 29.8232  | 38.7068  | No change |
| NM_133671    | U2af2         | 0.216052 | 1 | 0.400303 | 19.094   | 23.9959  | No change |
| NM_024213    | Anapc4        | 0.21611  | 1 | 0.512627 | 5.79904  | 7.88409  | No change |
| NM_001160145 | Tmem9         | 0.216737 | 1 | 0.556699 | 7.25331  | 10.1723  | No change |
| NM_024454    | Rab21         | 0.216863 | 1 | 0.517211 | 8.25311  | 11.2567  | No change |
| NM_026684    | Ndufb10       | 0.216883 | 1 | 0.399499 | 67.0589  | 84.2272  | No change |
| NM_001083929 | Gpx3          | 0.2171   | 1 | 0.35185  | 52.2583  | 63.4947  | No change |
| NM_025597    | Ndufb3        | 0.217189 | 1 | 0.495858 | 33.1434  | 44.532   | No change |
| NM_001205067 | Ikamp         | 0.217326 | 1 | 0.501925 | 8.61373  | 11.623   | No change |
| NM_175113    | Trmt6         | 0.217349 | 1 | 0.470726 | 7.63657  | 10.0813  | No change |
| NM_007554    | Bmp4          | 0.217389 | 1 | 0.888295 | 1.29385  | 2.30538  | No change |
| NM_007686    | Cfi           | 0.217389 | 1 | 0.888295 | 1.24392  | 2.21641  | No change |
| NM_133226    | Pdzd3         | 0.217389 | 1 | 0.888295 | 1.18232  | 2.10666  | No change |
| NM_028478    | Rassf6        | 0.217411 | 1 | 0.795325 | 1.85088  | 3.0799   | No change |
| NM_028115    | Trub1         | 0.217878 | 1 | 0.649908 | 1.81808  | 2.72408  | No change |
| NM_020332    | Ank           | 0.217996 | 1 | 0.573286 | 3.01019  | 4.27132  | No change |
| NM_001033633 | Slc2a13       | 0.218159 | 1 | 1.02459  | 0.255715 | 0.504875 | No change |
| NM_001123370 | 9030025P20Rik | 0.218218 | 1 | 0.444589 | 12.8537  | 16.6609  | No change |
| NM_008831    | Phb           | 0.218232 | 1 | 0.436465 | 16.3482  | 21.0704  | No change |
| NM_139139    | Dnajc17       | 0.218479 | 1 | 0.676791 | 6.01516  | 9.18754  | No change |
| NM_020579    | B4galt3       | 0.218587 | 1 | 0.530695 | 6.94139  | 9.55776  | No change |
| NM_001081374 | Prss36        | 0.218644 | 1 | 0.782233 | 1.25224  | 2.0639   | No change |
| NM_018791    | Zfp108        | 0.218644 | 1 | 0.782233 | 1.4569   | 2.40122  | No change |
| NM_026340    | Pop1          | 0.218901 | 1 | 0.741886 | 1.37149  | 2.19524  | No change |
| NM_033572    | Wbscr16       | 0.219104 | 1 | 0.504746 | 7.24082  | 9.78968  | No change |
| NM_028076    | Tmub2         | 0.219107 | 1 | 0.451213 | 12.3359  | 16.0639  | No change |
| NM_028782    | Lonp1         | 0.21919  | 1 | 0.379286 | 18.8277  | 23.3169  | No change |
| NM_138600    | Aldh7a1       | 0.21919  | 1 | 0.369496 | 21.8344  | 26.8569  | No change |
| NM_001163263 | Rnf20         | 0.219257 | 1 | 0.394472 | 10.7481  | 13.4525  | No change |
| NM_182650    | Hnrmpa2b1     | 0.219348 | 1 | 0.303082 | 127.368  | 149.597  | No change |
| NM_197985    | Adipor2       | 0.219451 | 1 | 0.376889 | 14.5787  | 18.0247  | No change |
| NR_027866    | 5730408K05Rik | 0.219468 | 1 | 1.15338  | 3.08536  | 6.7304   | No change |
| NM_022814    | Svep1         | 0.219597 | 1 | 0.438528 | 2.58992  | 3.34282  | No change |
| NM_001080796 | G3bp2         | 0.219887 | 1 | 0.313029 | 39.9186  | 47.2104  | No change |
| NM_027889    | Vps11         | 0.219919 | 1 | 0.367026 | 20.886   | 25.6461  | No change |
| NM_029512    | Ttpal         | 0.220053 | 1 | 0.439222 | 6.44078  | 8.31715  | No change |
| NM_001145778 | Zkscan3       | 0.220173 | 1 | 0.45105  | 10.0441  | 13.078   | No change |
| NM_001081409 | Phf20l1       | 0.220587 | 1 | 0.375213 | 8.9859   | 11.0969  | No change |
| NM_001081975 | Mfap1b        | 0.220702 | 1 | 0.350787 | 45.2801  | 54.9751  | No change |
| NM_134100    | Mfsd5         | 0.220773 | 1 | 0.605708 | 5.08094  | 7.37691  | No change |
| NM_007715    | Clock         | 0.220862 | 1 | 0.339736 | 13.7373  | 16.5509  | No change |
| NM_180974    | Foxn2         | 0.220893 | 1 | 0.49888  | 3.48191  | 4.68816  | No change |
| NM_001177778 | Dlg3          | 0.220907 | 1 | 0.538206 | 2.70762  | 3.74789  | No change |
| NM_027258    | Rnf157        | 0.220932 | 1 | 0.471852 | 4.71606  | 6.23062  | No change |
| NM_178613    | 4933433P14Rik | 0.220988 | 1 | 0.523803 | 5.30327  | 7.26671  | No change |
| NM_133883    | Adprhl2       | 0.221193 | 1 | 0.578523 | 7.59082  | 10.8106  | No change |
| NM_029007    | Fam84a        | 0.221213 | 1 | 0.360922 | 21.8357  | 26.6986  | No change |
| NM_026054    | 2810474O19Rik | 0.221691 | 1 | 0.384307 | 8.88356  | 11.0402  | No change |
| NM_153125    | Sec16a        | 0.221914 | 1 | 0.292005 | 34.3959  | 40.0892  | No change |
| NM_173445    | Rccd1         | 0.221975 | 1 | 0.584997 | 4.2888   | 6.13598  | No change |
| NM_010829    | Msh3          | 0.222383 | 1 | 0.384575 | 13.7619  | 17.1061  | No change |
| NM_010731    | Zbtb7a        | 0.222425 | 1 | 0.548575 | 2.34774  | 3.27355  | No change |
| NM_013904    | Hey2          | 0.222701 | 1 | 0.83822  | 1.23862  | 2.12651  | No change |
| NM_026935    | Sult1c2       | 0.222806 | 1 | 0.821073 | 2.28345  | 3.87132  | No change |
| NM_021895    | Actn4         | 0.223059 | 1 | 0.354037 | 22.0911  | 26.8816  | No change |
| NM_173761    | Ythdf1        | 0.223091 | 1 | 0.418322 | 11.6704  | 14.8517  | No change |
| NM_001083905 | Fetub         | 0.223332 | 1 | 0.805733 | 2.35387  | 3.94613  | No change |
| NM_007722    | Cxcr7         | 0.223361 | 1 | 0.603994 | 3.51302  | 5.09412  | No change |
| NM_177410    | Bcl2          | 0.223595 | 1 | 0.704892 | 2.15888  | 3.36431  | No change |
| NM_021356    | Gab1          | 0.223602 | 1 | 0.382814 | 11.6035  | 14.4055  | No change |
| NM_001168382 | Phf14         | 0.223832 | 1 | 0.443374 | 8.61839  | 11.1613  | No change |
| NM_153788    | Acap1         | 0.223969 | 1 | 0.432063 | 13.0569  | 16.7763  | No change |
| NM_177687    | Crebl2        | 0.224473 | 1 | 0.488833 | 7.74977  | 10.361   | No change |
| NM_025602    | Ccdc59        | 0.224766 | 1 | 0.612308 | 8.08128  | 11.7876  | No change |
| NM_175473    | Fras1         | 0.224766 | 1 | 0.612308 | 0.549698 | 0.801805 | No change |
| NM_025433    | Rpl7l1        | 0.224823 | 1 | 0.412169 | 15.4576  | 19.5869  | No change |
| NM_027098    | Mrpl30        | 0.2249   | 1 | 0.465667 | 34.5943  | 45.5057  | No change |
| NM_175102    | Sf3b5         | 0.224905 | 1 | 0.491966 | 26.2061  | 35.113   | No change |
| NM_012049    | Nit1          | 0.224977 | 1 | 0.375305 | 47.2583  | 58.3636  | No change |
| NM_145926    | Mgat4b        | 0.225121 | 1 | 0.717926 | 2.12321  | 3.3398   | No change |
| NM_028017    | Napg          | 0.225253 | 1 | 0.445507 | 8.26628  | 10.7212  | No change |
| NR_037224    | Mir3064       | 0.225286 | 1 | 0.580173 | 157.069  | 223.945  | No change |
| NM_001098171 | Pcdh10        | 0.225294 | 1 | 0.779436 | 0.480757 | 0.79063  | No change |
| NM_001100462 | Tmem221       | 0.225542 | 1 | 1.11385  | 0.860407 | 1.81926  | No change |
| NM_183106    | Ttc17         | 0.225657 | 1 | 0.500878 | 3.93171  | 5.30105  | No change |

|              |               |          |   |          |          |          |           |
|--------------|---------------|----------|---|----------|----------|----------|-----------|
| NM_001170982 | Hnrnpc        | 0.22619  | 1 | 0.356313 | 30.6709  | 37.3809  | No change |
| NM_152812    | Otud6b        | 0.226276 | 1 | 0.403767 | 13.8146  | 17.4025  | No change |
| NM_001100458 | Fam169a       | 0.226285 | 1 | 0.43156  | 7.31516  | 9.39557  | No change |
| NM_013841    | Vps45         | 0.2265   | 1 | 0.502188 | 6.84721  | 9.24042  | No change |
| NM_009063    | Rgs5          | 0.226519 | 1 | 0.672728 | 3.54436  | 5.39722  | No change |
| NM_027434    | Rprd1b        | 0.226735 | 1 | 0.499913 | 5.52086  | 7.43858  | No change |
| NM_011728    | Xpa           | 0.226949 | 1 | 0.573286 | 11.6033  | 16.4631  | No change |
| NM_144915    | Daglb         | 0.227097 | 1 | 0.732292 | 1.50478  | 2.39156  | No change |
| NM_007998    | Fech          | 0.227178 | 1 | 0.396705 | 17.0569  | 21.3814  | No change |
| NM_021451    | Pmaip1        | 0.227192 | 1 | 0.682515 | 2.31084  | 3.54356  | No change |
| NM_026794    | Deb1          | 0.227192 | 1 | 0.682515 | 11.8626  | 18.1907  | No change |
| NM_007749    | Cox7c         | 0.227451 | 1 | 0.418094 | 86.4565  | 110.005  | No change |
| NM_029332    | Akap13        | 0.227793 | 1 | 0.34134  | 8.97346  | 10.8233  | No change |
| NM_026616    | Rnaseh2c      | 0.228056 | 1 | 0.757711 | 6.79668  | 11.002   | No change |
| NM_145490    | Zfp959        | 0.228124 | 1 | 0.693149 | 2.84599  | 4.3975   | No change |
| NM_009609    | Actg1         | 0.228143 | 1 | 0.274848 | 359.651  | 414.22   | No change |
| NM_029790    | Mettl15       | 0.228165 | 1 | 0.64437  | 3.94349  | 5.88451  | No change |
| NM_001122832 | Eps15l1       | 0.228601 | 1 | 0.43895  | 9.31702  | 12.0286  | No change |
| NM_023051    | Clstn1        | 0.228775 | 1 | 0.462341 | 7.66433  | 10.0581  | No change |
| NM_009188    | Sin3b         | 0.228907 | 1 | 0.361653 | 19.8566  | 24.2907  | No change |
| NM_172532    | Aldh5a1       | 0.229201 | 1 | 0.452992 | 4.92429  | 6.42012  | No change |
| NM_019578    | Extl1         | 0.229281 | 1 | 0.581778 | 2.59189  | 3.69949  | No change |
| NM_177782    | Prex1         | 0.229335 | 1 | 0.463189 | 3.88487  | 5.10123  | No change |
| NM_010218    | Fjx1          | 0.229412 | 1 | 0.832673 | 1.34964  | 2.30725  | No change |
| NM_001083906 | Nr3c2         | 0.229444 | 1 | 0.52103  | 3.90499  | 5.33997  | No change |
| NM_011200    | Ptp4a1        | 0.229507 | 1 | 0.365445 | 18.8537  | 23.1247  | No change |
| NM_172938    | Scml4         | 0.229633 | 1 | 0.748205 | 0.969385 | 1.55837  | No change |
| NM_199033    | Tsen2         | 0.229716 | 1 | 0.933283 | 1.29643  | 2.38764  | No change |
| NM_198010    | Ankrd17       | 0.23009  | 1 | 0.328254 | 16.2447  | 19.4161  | No change |
| NM_001097617 | C1s           | 0.230404 | 1 | 0.385934 | 20.2852  | 25.2379  | No change |
| NM_025575    | Sys1          | 0.230438 | 1 | 0.549624 | 8.19152  | 11.4294  | No change |
| NM_146224    | Zfp280d       | 0.230903 | 1 | 0.434595 | 7.75076  | 9.976    | No change |
| NM_146013    | Sec14l4       | 0.230928 | 1 | 0.871285 | 0.971248 | 1.70815  | No change |
| NM_027490    | Dcp2          | 0.230964 | 1 | 0.419069 | 4.61233  | 5.87252  | No change |
| NM_010798    | Mif           | 0.23098  | 1 | 0.451035 | 51.9552  | 67.6442  | No change |
| NM_001109688 | 5730419I09Rik | 0.231041 | 1 | 0.411535 | 10.1802  | 12.8938  | No change |
| NM_175044    | Bcor          | 0.231357 | 1 | 0.547365 | 1.95249  | 2.71991  | No change |
| NM_133934    | Isy1          | 0.231469 | 1 | 0.527274 | 9.55641  | 13.1255  | No change |
| NM_025370    | 1110018J18Rik | 0.231565 | 1 | 0.571705 | 11.8306  | 16.766   | No change |
| NM_172883    | Mfsd7a        | 0.231666 | 1 | 0.77682  | 1.63951  | 2.69073  | No change |
| NM_001166642 | Bcas3         | 0.231669 | 1 | 0.443491 | 8.62718  | 11.1732  | No change |
| NM_011978    | Slc27a2       | 0.231801 | 1 | 0.673282 | 2.84708  | 4.33679  | No change |
| NM_025997    | Fam103a1      | 0.232073 | 1 | 0.41212  | 30.659   | 38.8468  | No change |
| NM_148917    | Pabpc4        | 0.232087 | 1 | 0.606895 | 3.73704  | 5.42957  | No change |
| NM_001190352 | Tmem132b      | 0.232096 | 1 | 0.556077 | 1.60143  | 2.24459  | No change |
| NM_010590    | Jub           | 0.232293 | 1 | 0.476908 | 6.58532  | 8.7305   | No change |
| NM_028372    | Mblac2        | 0.232347 | 1 | 0.56865  | 3.03481  | 4.29155  | No change |
| NM_026220    | Mfap1a        | 0.23242  | 1 | 0.358074 | 26.7234  | 32.6094  | No change |
| NM_175324    | Acad11        | 0.232452 | 1 | 0.453228 | 8.53468  | 11.1289  | No change |
| NM_001164528 | Ildr2         | 0.232502 | 1 | 0.528892 | 1.86467  | 2.56392  | No change |
| NM_028097    | Tmem68        | 0.232579 | 1 | 0.549304 | 5.13668  | 7.16536  | No change |
| NM_025900    | Dek           | 0.232677 | 1 | 0.402988 | 18.8026  | 23.6728  | No change |
| NM_133783    | Ptges2        | 0.233069 | 1 | 0.59784  | 5.06988  | 7.31885  | No change |
| NM_153161    | BC037034      | 0.233349 | 1 | 0.411307 | 17.5464  | 22.2197  | No change |
| NM_001145958 | Crocc         | 0.233406 | 1 | 0.515636 | 2.72412  | 3.71096  | No change |
| NM_025591    | Fam136a       | 0.233476 | 1 | 0.460977 | 16.7072  | 21.9038  | No change |
| NM_001145970 | Mtap7d1       | 0.233545 | 1 | 0.660598 | 2.2205   | 3.35176  | No change |
| NM_172630    | Mppe1         | 0.23365  | 1 | 0.615049 | 4.47952  | 6.54596  | No change |
| NM_010806    | Milt4         | 0.233695 | 1 | 0.370744 | 10.3553  | 12.7479  | No change |
| NM_144786    | Ggt7          | 0.233766 | 1 | 0.437567 | 12.919   | 16.6623  | No change |
| NM_009072    | Rock2         | 0.233978 | 1 | 0.416674 | 5.28003  | 6.71136  | No change |
| NM_001034881 | Gm5464        | 0.234189 | 1 | 1.75128  | 0.258601 | 0.899052 | No change |
| NM_028049    | Fbxo22        | 0.234215 | 1 | 0.499065 | 9.28355  | 12.5002  | No change |
| NM_174960    | Gimap9        | 0.234714 | 1 | 0.967013 | 1.51178  | 2.85503  | No change |
| NM_010282    | Ggps1         | 0.234958 | 1 | 0.456948 | 11.9146  | 15.5764  | No change |
| NM_144543    | Thyn1         | 0.235069 | 1 | 0.553234 | 13.7504  | 19.2337  | No change |
| NM_172517    | Rbbp5         | 0.235115 | 1 | 0.475493 | 6.58168  | 8.71691  | No change |
| NM_198035    | Zbtb39        | 0.235309 | 1 | 0.513187 | 2.96341  | 4.02995  | No change |
| NR_033911    | Dnajc12       | 0.235857 | 1 | 0.812199 | 3.14586  | 5.29708  | No change |
| NM_175190    | 2900010J23Rik | 0.236176 | 1 | 0.340667 | 173.143  | 208.736  | No change |
| NM_175312    | B630005N14Rik | 0.236189 | 1 | 0.455806 | 6.96761  | 9.10173  | No change |
| NM_026955    | 2200002K05Rik | 0.236282 | 1 | 0.844668 | 1.61261  | 2.78064  | No change |
| NM_025812    | Hmg20a        | 0.23652  | 1 | 0.463912 | 7.57746  | 9.95464  | No change |
| NM_133825    | D1Erttd622e   | 0.236727 | 1 | 0.500578 | 7.17802  | 9.67526  | No change |
| NM_001081112 | Ankrd26       | 0.236837 | 1 | 0.559753 | 2.24816  | 3.1591   | No change |
| NM_009503    | Vcp           | 0.237048 | 1 | 0.317517 | 68.2003  | 80.9083  | No change |

|              |               |          |   |          |          |         |           |
|--------------|---------------|----------|---|----------|----------|---------|-----------|
| NM_009721    | Atp1b1        | 0.237081 | 1 | 0.428934 | 15.7687  | 20.2153 | No change |
| NM_028121    | Adpgk         | 0.237147 | 1 | 0.521421 | 6.79725  | 9.29709 | No change |
| NM_001206382 | Mavs          | 0.237438 | 1 | 0.53048  | 5.31935  | 7.32215 | No change |
| NM_026810    | Mlh1          | 0.237617 | 1 | 0.479251 | 9.09388  | 12.0757 | No change |
| NM_146108    | Hibch         | 0.237729 | 1 | 0.64635  | 4.53986  | 6.78307 | No change |
| NM_198894    | Abr           | 0.237774 | 1 | 0.386444 | 12.6429  | 15.735  | No change |
| NM_028965    | Snx11         | 0.237859 | 1 | 0.459746 | 10.9359  | 14.3248 | No change |
| NM_009598    | Ace           | 0.23812  | 1 | 0.316124 | 76.9317  | 91.1784 | No change |
| NM_008794    | Pcsk7         | 0.238158 | 1 | 0.466345 | 6.98026  | 9.18563 | No change |
| NM_001045528 | Fkbp15        | 0.238396 | 1 | 0.403713 | 11.9579  | 15.0625 | No change |
| NM_028242    | Htatsf1       | 0.238638 | 1 | 0.420616 | 14.9202  | 19.0168 | No change |
| NM_028603    | Zbtb8a        | 0.23879  | 1 | 0.566677 | 5.56543  | 7.5868  | No change |
| NM_001159561 | P2rx6         | 0.238834 | 1 | 0.763912 | 1.96925  | 3.20128 | No change |
| NM_016911    | Srpx          | 0.238834 | 1 | 0.763912 | 1.8161   | 2.95232 | No change |
| NM_001102430 | Arfgef1       | 0.238849 | 1 | 0.323348 | 29.0569  | 34.611  | No change |
| NM_001081098 | Zfp362        | 0.238865 | 1 | 0.574829 | 4.08678  | 5.80406 | No change |
| NM_001013381 | Rsad1         | 0.239032 | 1 | 0.669671 | 1.66215  | 2.52505 | No change |
| NM_026851    | Mrpl52        | 0.239301 | 1 | 0.597888 | 24.8662  | 35.8955 | No change |
| NM_030057    | Trappc6b      | 0.24006  | 1 | 0.490604 | 17.4371  | 23.3392 | No change |
| NM_138745    | Mthfd1        | 0.240176 | 1 | 0.650356 | 2.30632  | 3.45564 | No change |
| NM_008480    | Lama1         | 0.240664 | 1 | 0.458119 | 3.08998  | 4.04286 | No change |
| NM_138668    | Ufsp2         | 0.240729 | 1 | 0.506666 | 12.6176  | 17.0797 | No change |
| NM_008979    | Ptpn22        | 0.241011 | 1 | 0.527376 | 6.0547   | 8.31596 | No change |
| NM_178804    | Slit2         | 0.241444 | 1 | 0.596549 | 1.30871  | 1.88734 | No change |
| NM_053181    | Pdxdc1        | 0.241522 | 1 | 0.303272 | 119.73   | 140.642 | No change |
| NM_015822    | Fbxl3         | 0.241568 | 1 | 0.381462 | 17.1454  | 21.2645 | No change |
| NM_198301    | Fam105a       | 0.241936 | 1 | 0.634329 | 5.3137   | 7.87122 | No change |
| NM_011084    | Pik3c2g       | 0.24199  | 1 | 1.00694  | 0.530358 | 1.03194 | No change |
| NM_007536    | Bcl2a1d       | 0.242049 | 1 | 0.716519 | 7.00432  | 11.0031 | No change |
| NM_013608    | Naca          | 0.242102 | 1 | 0.369326 | 79.4175  | 97.6691 | No change |
| NM_009257    | Serpinb5      | 0.242289 | 1 | 0.795033 | 1.54873  | 2.57496 | No change |
| NM_145222    | B3gnt7        | 0.242289 | 1 | 0.795033 | 1.53083  | 2.54519 | No change |
| NM_001163356 | 6530418L21Rik | 0.242303 | 1 | 0.647287 | 1.72932  | 2.58536 | No change |
| NM_001029889 | Gm608         | 0.242388 | 1 | 0.385776 | 5.51197  | 6.85676 | No change |
| NM_001081321 | Pds5a         | 0.242606 | 1 | 0.375446 | 19.6001  | 24.2074 | No change |
| NM_024206    | Sec13         | 0.243195 | 1 | 0.364369 | 75.3712  | 92.3736 | No change |
| NM_011740    | Ywhaz         | 0.24327  | 1 | 0.322219 | 61.78    | 73.5309 | No change |
| NM_029735    | Eprs          | 0.243295 | 1 | 0.365104 | 20.0026  | 24.5273 | No change |
| NM_027193    | Dph5          | 0.243425 | 1 | 0.857079 | 2.00139  | 3.48189 | No change |
| NM_133905    | Papd4         | 0.243584 | 1 | 0.555961 | 7.33022  | 10.2723 | No change |
| NM_027352    | Gorasp2       | 0.24367  | 1 | 0.391427 | 28.5537  | 35.6601 | No change |
| NM_029600    | Abcc3         | 0.243783 | 1 | 0.372261 | 17.3884  | 21.4282 | No change |
| NM_022988    | Nif3l1        | 0.244071 | 1 | 0.620815 | 4.36822  | 6.40869 | No change |
| NM_012000    | Cln8          | 0.24428  | 1 | 0.553675 | 2.17824  | 3.04757 | No change |
| NM_145594    | Fgl1          | 0.24438  | 1 | 1.15133  | 1.12007  | 2.43577 | No change |
| NM_178679    | Zfp365        | 0.24438  | 1 | 1.15133  | 0.294685 | 0.64084 | No change |
| NM_001168592 | Commdd6       | 0.244419 | 1 | 0.575533 | 14.0516  | 19.965  | No change |
| NM_028887    | Smchd1        | 0.244682 | 1 | 0.369435 | 13.1039  | 16.1165 | No change |
| NM_001042710 | Prss57        | 0.244739 | 1 | 0.679054 | 2.51029  | 3.8388  | No change |
| NM_030209    | Crispld2      | 0.244774 | 1 | 0.530401 | 3.99685  | 5.50109 | No change |
| NM_053194    | Ric8          | 0.244868 | 1 | 0.456247 | 10.4997  | 13.7194 | No change |
| NM_080458    | Bsnd          | 0.245064 | 1 | 0.877415 | 1.07852  | 1.90455 | No change |
| NM_025474    | Mrps14        | 0.245087 | 1 | 0.52048  | 9.09192  | 12.4268 | No change |
| NM_001201341 | LOC100504473  | 0.245224 | 1 | 0.597934 | 13.5812  | 19.6045 | No change |
| NM_019668    | Ube2a         | 0.245478 | 1 | 0.704334 | 3.61277  | 5.62557 | No change |
| NM_175433    | Zfp710        | 0.245495 | 1 | 0.55556  | 3.07559  | 4.30873 | No change |
| NM_026192    | Calcoco1      | 0.24551  | 1 | 0.424342 | 15.597   | 19.9306 | No change |
| NM_001198985 | Tjp2          | 0.245579 | 1 | 0.377912 | 17.7022  | 21.9008 | No change |
| NM_134129    | Prpf19        | 0.245663 | 1 | 0.505231 | 9.78796  | 13.2356 | No change |
| NM_001164580 | BC030336      | 0.245718 | 1 | 0.46275  | 6.08842  | 7.9916  | No change |
| NM_026992    | Dnajc24       | 0.245838 | 1 | 0.666396 | 6.05014  | 9.16863 | No change |
| NM_011145    | Ppard         | 0.245839 | 1 | 0.688549 | 2.01412  | 3.10098 | No change |
| NM_146134    | Aph1a         | 0.245875 | 1 | 0.519224 | 11.2145  | 15.3142 | No change |
| NM_001160400 | Megf8         | 0.245935 | 1 | 0.444842 | 3.51935  | 4.56202 | No change |
| NM_007472    | Aqp1          | 0.245957 | 1 | 0.479504 | 9.16614  | 12.1733 | No change |
| NM_025795    | Ncaph2        | 0.246014 | 1 | 0.4592   | 9.2769   | 12.1466 | No change |
| NM_023322    | Zkscan14      | 0.246112 | 1 | 0.629555 | 4.46795  | 6.59564 | No change |
| NM_001037170 | Tommm40l      | 0.246224 | 1 | 0.635392 | 2.9357   | 4.35171 | No change |
| NM_007381    | Acadl         | 0.246461 | 1 | 0.504314 | 10.8665  | 14.6845 | No change |
| NM_172498    | Ptk2b         | 0.246496 | 1 | 0.459899 | 7.81103  | 10.2322 | No change |
| NM_011900    | Mpdu1         | 0.246925 | 1 | 0.477714 | 19.7304  | 26.1704 | No change |
| NM_010754    | Smad2         | 0.246959 | 1 | 0.49136  | 9.15552  | 12.2605 | No change |
| NM_001081274 | Pgd           | 0.247286 | 1 | 0.447875 | 15.6057  | 20.2719 | No change |
| NM_144852    | Slc7a4        | 0.247492 | 1 | 0.403675 | 18.011   | 22.686  | No change |
| NM_022026    | Aqp9          | 0.247505 | 1 | 0.372852 | 34.5565  | 42.6021 | No change |
| NM_007548    | Prdm1         | 0.247565 | 1 | 0.900451 | 0.52849  | 0.94921 | No change |

|              |               |          |   |          |          |          |           |
|--------------|---------------|----------|---|----------|----------|----------|-----------|
| NM_134102    | Pla1a         | 0.247784 | 1 | 0.662748 | 3.77768  | 5.70982  | No change |
| NM_009621    | Adamts1       | 0.247818 | 1 | 0.576987 | 2.51094  | 3.57118  | No change |
| NM_010822    | Mpg           | 0.24806  | 1 | 0.500603 | 12.3011  | 16.5798  | No change |
| NM_001013769 | Rsl1          | 0.2481   | 1 | 0.791927 | 2.0107   | 3.33503  | No change |
| NM_001033342 | Cdc42bpg      | 0.248117 | 1 | 0.622002 | 1.55803  | 2.28763  | No change |
| NM_026758    | Mphosph6      | 0.248277 | 1 | 0.612195 | 9.38937  | 13.6907  | No change |
| NM_138741    | Sdpr          | 0.248376 | 1 | 0.585724 | 3.80973  | 5.45188  | No change |
| NM_011490    | Stau1         | 0.248407 | 1 | 0.409721 | 18.3267  | 23.181   | No change |
| NM_007484    | Rhoc          | 0.248445 | 1 | 0.607669 | 9.63558  | 14.0047  | No change |
| NM_011543    | Skp1a         | 0.248688 | 1 | 0.356224 | 85.8939  | 104.675  | No change |
| NM_007876    | Dpep1         | 0.248732 | 1 | 0.645302 | 3.66478  | 5.4707   | No change |
| NM_001024206 | Trappc1       | 0.248798 | 1 | 0.536546 | 21.8901  | 30.2582  | No change |
| NM_001039081 | Mier1         | 0.248831 | 1 | 0.415511 | 10.9528  | 13.91    | No change |
| NM_019711    | Rbms2         | 0.249205 | 1 | 0.476425 | 5.13964  | 6.81097  | No change |
| NM_009740    | Bcl10         | 0.249218 | 1 | 0.531846 | 9.62238  | 13.2569  | No change |
| NM_144530    | Zc3h11a       | 0.249261 | 1 | 0.368869 | 22.8663  | 28.112   | No change |
| NM_020604    | Jph1          | 0.249315 | 1 | 0.85082  | 0.681416 | 1.17984  | No change |
| NM_013668    | Kdm5c         | 0.249679 | 1 | 0.455859 | 5.22669  | 6.82742  | No change |
| NM_153412    | Phldb2        | 0.249826 | 1 | 0.538111 | 2.95621  | 4.09077  | No change |
| NM_178337    | Tbce          | 0.250107 | 1 | 0.437799 | 22.0225  | 28.4065  | No change |
| NM_001025375 | Wdr61         | 0.25013  | 1 | 0.456506 | 25.6562  | 33.5288  | No change |
| NM_009687    | Apex1         | 0.25013  | 1 | 0.456506 | 25.0084  | 32.6822  | No change |
| NM_001164402 | Ptpro         | 0.250133 | 1 | 0.760218 | 1.1373   | 1.84344  | No change |
| NM_134065    | Epdr1         | 0.250133 | 1 | 0.760218 | 1.98539  | 3.21811  | No change |
| NM_028365    | Zfp839        | 0.250444 | 1 | 0.550537 | 4.00384  | 5.5891   | No change |
| NM_001081302 | Trio          | 0.25049  | 1 | 0.364451 | 9.64438  | 11.8205  | No change |
| NM_020260    | Arhgap31      | 0.250635 | 1 | 0.397921 | 8.49276  | 10.6543  | No change |
| NM_009537    | Yy1           | 0.250676 | 1 | 0.489798 | 10.346   | 13.8392  | No change |
| NM_011227    | Rab20         | 0.250678 | 1 | 0.642549 | 11.6798  | 17.4009  | No change |
| NM_178778    | Scal          | 0.25079  | 1 | 0.369484 | 9.53199  | 11.7237  | No change |
| NM_026484    | Ccny          | 0.251032 | 1 | 0.367673 | 26.3192  | 32.3301  | No change |
| NM_177784    | Klhl23        | 0.251051 | 1 | 0.389962 | 16.0156  | 19.9808  | No change |
| NM_145931    | Zc3h7a        | 0.251244 | 1 | 0.375272 | 24.3916  | 30.121   | No change |
| NM_001199246 | Maged2        | 0.251298 | 1 | 0.424609 | 22.3031  | 28.5047  | No change |
| NM_019800    | Acp6          | 0.2513   | 1 | 0.675282 | 4.04822  | 6.17337  | No change |
| NM_013830    | Prpf4b        | 0.251403 | 1 | 0.394301 | 15.6208  | 19.5472  | No change |
| NM_152814    | Zfp566        | 0.251425 | 1 | 0.971836 | 1.27688  | 2.41849  | No change |
| NM_010832    | Msl3          | 0.25177  | 1 | 0.500346 | 9.55686  | 12.8784  | No change |
| NR_037196    | Itch          | 0.251904 | 1 | 0.410299 | 10.4772  | 13.2576  | No change |
| NM_021713    | Myg1          | 0.252038 | 1 | 0.61816  | 6.59703  | 9.6595   | No change |
| NM_130449    | Colec12       | 0.252184 | 1 | 0.608932 | 3.10492  | 4.51665  | No change |
| NR_036613    | Srsf3         | 0.252312 | 1 | 0.364898 | 37.356   | 45.7989  | No change |
| NM_025401    | Ubl5          | 0.252324 | 1 | 0.449722 | 18.4746  | 24.0291  | No change |
| NM_008858    | Prkd1         | 0.25233  | 1 | 0.544694 | 4.17014  | 5.79726  | No change |
| NM_001081227 | 6330403A02Rik | 0.25241  | 1 | 1.05496  | 0.255091 | 0.514591 | No change |
| NM_001033212 | Rprml         | 0.252535 | 1 | 1.24314  | 0.975181 | 2.27695  | No change |
| NM_007892    | E2f5          | 0.252695 | 1 | 0.511555 | 11.6354  | 15.803   | No change |
| NM_015731    | Atp9a         | 0.252904 | 1 | 0.351926 | 41.8079  | 50.7968  | No change |
| NM_027353    | Cd2bp2        | 0.252984 | 1 | 0.434837 | 12.9242  | 16.6361  | No change |
| NM_133722    | Fam108c       | 0.25304  | 1 | 0.56722  | 6.0413   | 8.5328   | No change |
| NM_001164639 | Slk           | 0.253161 | 1 | 0.394045 | 10.3479  | 12.9466  | No change |
| NM_011777    | Zyx           | 0.25337  | 1 | 0.558073 | 5.91732  | 8.30396  | No change |
| NM_172643    | Zbtb41        | 0.253399 | 1 | 0.445264 | 4.54229  | 5.88957  | No change |
| NM_031408    | Gigyf1        | 0.25343  | 1 | 0.574696 | 2.37094  | 3.36644  | No change |
| NR_028440    | Ccdc85b       | 0.253505 | 1 | 0.801067 | 0.955149 | 1.5946   | No change |
| NR_029468    | Shhg12        | 0.253614 | 1 | 0.814295 | 6.32527  | 10.662   | No change |
| NM_019535    | Sh3gl2        | 0.253878 | 1 | 0.571905 | 4.69421  | 6.65205  | No change |
| NM_001081260 | Tnks1bp1      | 0.254408 | 1 | 0.445734 | 6.64551  | 8.61941  | No change |
| NM_001033445 | Fam59a        | 0.25455  | 1 | 0.482722 | 5.53697  | 7.36972  | No change |
| NM_173432    | Pskh1         | 0.254665 | 1 | 0.460684 | 10.0911  | 13.2258  | No change |
| NM_007865    | Dll1          | 0.254706 | 1 | 0.767859 | 1.36214  | 2.21991  | No change |
| NM_001033189 | C77080        | 0.254809 | 1 | 0.576827 | 2.47224  | 3.5155   | No change |
| NR_027641    | Sec16b        | 0.254988 | 1 | 0.845038 | 0.771392 | 1.32976  | No change |
| NM_010763    | Man1a2        | 0.255003 | 1 | 0.341073 | 24.6816  | 29.763   | No change |
| NM_011482    | Nhp2l1        | 0.255161 | 1 | 0.393408 | 59.3249  | 74.1897  | No change |
| NM_022992    | Arl6ip5       | 0.255234 | 1 | 0.540965 | 12.3355  | 17.1033  | No change |
| NM_011876    | Twf2          | 0.255332 | 1 | 0.704092 | 3.93498  | 6.1252   | No change |
| NM_026530    | Mpnd          | 0.255332 | 1 | 0.704092 | 3.70269  | 5.76362  | No change |
| NM_009820    | Runx2         | 0.255457 | 1 | 0.528892 | 3.08954  | 4.24748  | No change |
| NM_134142    | Tmem109       | 0.255561 | 1 | 0.509783 | 10.9528  | 14.8572  | No change |
| NM_001122952 | Nfia          | 0.255852 | 1 | 0.470835 | 3.2314   | 4.26535  | No change |
| NM_138667    | Tab2          | 0.25589  | 1 | 0.420639 | 12.1531  | 15.4893  | No change |
| NM_053070    | Car7          | 0.255904 | 1 | 0.62427  | 6.25333  | 9.19559  | No change |
| NM_001161723 | Tcfef         | 0.256463 | 1 | 0.915915 | 1.13858  | 2.06793  | No change |
| NM_001039162 | Clip2         | 0.256583 | 1 | 0.576074 | 2.66515  | 3.78774  | No change |
| NM_175258    | Rapgef6       | 0.256752 | 1 | 0.380087 | 11.4978  | 14.246   | No change |

|              |               |          |   |          |          |          |           |
|--------------|---------------|----------|---|----------|----------|----------|-----------|
| NM_026494    | Ppcs          | 0.256969 | 1 | 0.684462 | 4.83979  | 7.42837  | No change |
| NM_198725    | Egfl7         | 0.256969 | 1 | 0.684462 | 5.16627  | 7.92947  | No change |
| NM_001114085 | Nde1          | 0.256983 | 1 | 0.573286 | 8.02856  | 11.3878  | No change |
| NM_001166640 | Csrp2bp       | 0.256983 | 1 | 0.573286 | 4.07698  | 5.78286  | No change |
| NM_008164    | Rhpn1         | 0.257008 | 1 | 0.528892 | 8.21203  | 11.2897  | No change |
| NM_080467    | Atp6v0a4      | 0.257258 | 1 | 0.715305 | 1.82453  | 2.8629   | No change |
| NM_017367    | Ccni          | 0.257314 | 1 | 0.345641 | 66.2878  | 80.1888  | No change |
| NM_019780    | Vps29         | 0.257561 | 1 | 0.477203 | 29.3783  | 38.9512  | No change |
| NM_153592    | Erlin2        | 0.257701 | 1 | 0.388962 | 21.39    | 26.6668  | No change |
| NM_001080999 | Trmt2a        | 0.25809  | 1 | 0.50242  | 6.30437  | 8.50754  | No change |
| NM_026845    | Ppil1         | 0.25809  | 1 | 0.50242  | 18.8716  | 25.4666  | No change |
| NM_029836    | Tspyl2        | 0.258245 | 1 | 0.426471 | 18.0423  | 23.0887  | No change |
| NM_011086    | Pikfyve       | 0.25831  | 1 | 0.414497 | 5.15189  | 6.53805  | No change |
| NM_011277    | Rnf2          | 0.258693 | 1 | 0.403632 | 22.3257  | 28.1189  | No change |
| NM_026675    | Nudt22        | 0.258842 | 1 | 0.64437  | 8.72034  | 13.0072  | No change |
| NM_026988    | Ptms          | 0.258849 | 1 | 0.531643 | 15.7488  | 21.6927  | No change |
| NM_011916    | Xrn1          | 0.259015 | 1 | 0.539037 | 3.12928  | 4.33278  | No change |
| NM_001169577 | Ube2h         | 0.259021 | 1 | 0.405429 | 15.9923  | 20.1674  | No change |
| NM_172480    | Mtrr          | 0.259028 | 1 | 0.518908 | 5.45538  | 7.44744  | No change |
| NM_027890    | Susd2         | 0.259168 | 1 | 0.668167 | 2.35521  | 3.57301  | No change |
| NM_016772    | Ech1          | 0.259355 | 1 | 0.460733 | 30.1309  | 39.4913  | No change |
| NM_053183    | Ddx50         | 0.259378 | 1 | 0.395499 | 30.6627  | 38.4012  | No change |
| NM_013861    | Tpk1          | 0.259446 | 1 | 0.607137 | 4.2436   | 6.16472  | No change |
| NM_001033490 | Pus11         | 0.259931 | 1 | 0.765932 | 3.92236  | 6.38272  | No change |
| NM_001033540 | Gm5113        | 0.26045  | 1 | 0.83968  | 1.20282  | 2.06505  | No change |
| NM_172753    | Csgalnact1    | 0.260476 | 1 | 1.41342  | 0.212425 | 0.565283 | No change |
| NM_177093    | Lrrc58        | 0.260492 | 1 | 0.336134 | 29.5984  | 35.5696  | No change |
| NM_001122843 | Tnpo2         | 0.260507 | 1 | 0.422625 | 10.9899  | 14.0259  | No change |
| NM_177326    | Pak2          | 0.260589 | 1 | 0.404833 | 16.6454  | 20.9821  | No change |
| NR_015531    | 2700023E23Rik | 0.260756 | 1 | 0.721013 | 5.71805  | 9.00852  | No change |
| NM_011434    | Sod1          | 0.260978 | 1 | 0.43365  | 72.7044  | 93.5055  | No change |
| NM_145997    | Kdm5a         | 0.261121 | 1 | 0.370467 | 10.96    | 13.489   | No change |
| NM_172838    | Slc16a12      | 0.261165 | 1 | 0.609812 | 2.79132  | 4.06259  | No change |
| NM_001161816 | Gm15455       | 0.261187 | 1 | 0.61412  | 3.48927  | 5.09392  | No change |
| NM_007464    | Birc3         | 0.261285 | 1 | 0.52022  | 7.21474  | 9.85817  | No change |
| NM_028308    | 2700078K21Rik | 0.261322 | 1 | 0.512564 | 14.8385  | 20.1666  | No change |
| NM_008590    | Mest          | 0.261408 | 1 | 0.684742 | 2.79539  | 4.29108  | No change |
| NM_153063    | Zfp472        | 0.261619 | 1 | 0.628428 | 4.14519  | 6.11314  | No change |
| NM_028095    | Mettl10       | 0.26191  | 1 | 0.633722 | 8.73588  | 12.9317  | No change |
| NM_001001309 | Irga8         | 0.261947 | 1 | 0.499662 | 4.19459  | 5.64941  | No change |
| NM_007479    | Arf4          | 0.262236 | 1 | 0.389341 | 43.2765  | 53.9663  | No change |
| NM_029872    | Hnrnpa0       | 0.262637 | 1 | 0.481849 | 10.722   | 14.2617  | No change |
| NM_001136076 | P4ha2         | 0.262849 | 1 | 0.557844 | 6.76126  | 9.48599  | No change |
| NM_173427    | Klhdc7a       | 0.262906 | 1 | 0.60433  | 1.92864  | 2.7961   | No change |
| NM_026958    | 1810035L17Rik | 0.263111 | 1 | 0.550221 | 38.9216  | 54.3144  | No change |
| NM_172271    | Slc6a17       | 0.263123 | 1 | 0.621542 | 1.61306  | 2.36724  | No change |
| NM_023172    | Ndufb9        | 0.263155 | 1 | 0.44027  | 68.6224  | 88.6635  | No change |
| NM_001159569 | Meis2         | 0.263213 | 1 | 0.992549 | 0.417323 | 0.802454 | No change |
| NM_011986    | Ncdn          | 0.263213 | 1 | 0.525091 | 5.34796  | 7.33234  | No change |
| NM_001164769 | Fbxw2         | 0.263511 | 1 | 0.521513 | 8.9015   | 12.1738  | No change |
| NM_133743    | Lypd3         | 0.263558 | 1 | 1.29443  | 0.598957 | 1.45433  | No change |
| NR_015493    | 2810403D21Rik | 0.263738 | 1 | 1.19186  | 1.17889  | 2.64305  | No change |
| NM_172600    | 6720456H20Rik | 0.263819 | 1 | 0.499208 | 4.74147  | 6.38387  | No change |
| NM_025880    | 2410002F23Rik | 0.264196 | 1 | 0.451309 | 20.1132  | 26.1881  | No change |
| NM_001162946 | Pcx           | 0.264241 | 1 | 0.488146 | 6.61982  | 8.84407  | No change |
| NM_001081055 | Trappc10      | 0.264344 | 1 | 0.397336 | 15.9491  | 19.9996  | No change |
| NM_145497    | BC016495      | 0.264349 | 1 | 0.806877 | 2.52263  | 4.22818  | No change |
| NM_023663    | Ripk4         | 0.264388 | 1 | 0.528892 | 5.45764  | 7.50266  | No change |
| NM_008009    | Fgfbp1        | 0.264416 | 1 | 2.03985  | 0.240528 | 1.11496  | No change |
| NM_016765    | Ddah2         | 0.264566 | 1 | 0.703871 | 4.94799  | 7.69964  | No change |
| NM_023596    | Slc29a3       | 0.264595 | 1 | 0.402385 | 14.2844  | 17.9751  | No change |
| NM_175552    | Wdr3          | 0.264828 | 1 | 0.48763  | 8.09154  | 10.8063  | No change |
| NM_172507    | Sh3bgrl2      | 0.264995 | 1 | 0.497844 | 7.22815  | 9.72255  | No change |
| NM_178017    | Hmgxb4        | 0.265048 | 1 | 0.589054 | 3.28159  | 4.70638  | No change |
| NM_172757    | Heatr3        | 0.265156 | 1 | 0.561314 | 4.8654   | 6.84268  | No change |
| NM_001039483 | Tmco1         | 0.265169 | 1 | 0.476786 | 6.90075  | 9.14637  | No change |
| NM_011714    | Baz1b         | 0.265326 | 1 | 0.410697 | 10.422   | 13.1909  | No change |
| NM_008839    | Pik3ca        | 0.265401 | 1 | 0.413028 | 7.28427  | 9.23452  | No change |
| NM_025594    | Zmat2         | 0.265531 | 1 | 0.480912 | 13.1852  | 17.5263  | No change |
| NM_024204    | Ankrd22       | 0.265566 | 1 | 0.755401 | 2.9403   | 4.74786  | No change |
| NM_008067    | Gabra3        | 0.265715 | 1 | 0.834701 | 0.991072 | 1.69509  | No change |
| NM_013528    | Gfpt1         | 0.265739 | 1 | 0.389163 | 15.0027  | 18.7061  | No change |
| NM_053139    | Pcdhb14       | 0.265782 | 1 | 0.932016 | 0.75004  | 1.37819  | No change |
| NM_029979    | Trim35        | 0.265836 | 1 | 0.413609 | 17.5935  | 22.3129  | No change |
| NM_019830    | Prmt1         | 0.266    | 1 | 0.525169 | 15.8891  | 21.7856  | No change |
| NM_025844    | Chordc1       | 0.26632  | 1 | 0.527631 | 9.00793  | 12.3721  | No change |

|              |               |          |   |          |          |         |           |
|--------------|---------------|----------|---|----------|----------|---------|-----------|
| NM_011585    | Tia1          | 0.266552 | 1 | 0.462771 | 8.06365  | 10.5834 | No change |
| NM_053076    | Rtn3          | 0.266697 | 1 | 0.355581 | 64.3942  | 78.4369 | No change |
| NM_001164295 | Cuedc2        | 0.266716 | 1 | 0.495904 | 14.7156  | 19.7668 | No change |
| NM_133658    | Ercc3         | 0.266991 | 1 | 0.47367  | 12.1239  | 16.0341 | No change |
| NM_172557    | Rufy1         | 0.267023 | 1 | 0.510305 | 8.68211  | 11.7805 | No change |
| NM_021526    | Psmc14        | 0.267033 | 1 | 0.54617  | 11.216   | 15.6067 | No change |
| NM_001184706 | Tfdp2         | 0.267105 | 1 | 0.433409 | 6.88151  | 8.84868 | No change |
| NM_013470    | Anxa3         | 0.267193 | 1 | 0.55126  | 10.4299  | 14.565  | No change |
| NM_011753    | Zfp26         | 0.267238 | 1 | 0.419257 | 5.35818  | 6.82225 | No change |
| NM_025455    | Ccdc28b       | 0.267238 | 1 | 0.652275 | 10.371   | 15.5547 | No change |
| NM_001081196 | Hnrnpul2      | 0.267241 | 1 | 0.43744  | 8.45906  | 10.9078 | No change |
| NM_010291    | Gjb5          | 0.267408 | 1 | 1.60862  | 0.408996 | 1.26393 | No change |
| NM_009035    | Rbpj          | 0.267625 | 1 | 0.462365 | 6.61586  | 8.68073 | No change |
| NM_001001932 | Eea1          | 0.267638 | 1 | 0.449503 | 5.38973  | 7.00869 | No change |
| NM_026735    | Mobkl1a       | 0.2677   | 1 | 0.503267 | 7.78029  | 10.5049 | No change |
| NM_145131    | Pitrm1        | 0.267842 | 1 | 0.60418  | 3.29336  | 4.77388 | No change |
| NM_013722    | Syn3          | 0.267871 | 1 | 0.608052 | 1.29399  | 1.88084 | No change |
| NM_011189    | Psme1         | 0.26801  | 1 | 0.658851 | 8.63137  | 13.0061 | No change |
| NM_025932    | Syap1         | 0.268055 | 1 | 0.436595 | 21.3352  | 27.4951 | No change |
| NM_016905    | Galk1         | 0.268109 | 1 | 0.520645 | 14.1607  | 19.354  | No change |
| NM_017406    | Atf6b         | 0.268174 | 1 | 0.643535 | 3.63615  | 5.41979 | No change |
| NM_001033475 | Tmed8         | 0.268372 | 1 | 0.464352 | 5.03839  | 6.62009 | No change |
| NM_207202    | Ccdc120       | 0.268555 | 1 | 0.689539 | 1.97154  | 3.03648 | No change |
| NM_001017966 | Ddi2          | 0.268574 | 1 | 0.46275  | 10.4175  | 13.6725 | No change |
| NM_017381    | Zranb2        | 0.269369 | 1 | 0.420172 | 23.7372  | 30.2422 | No change |
| NM_020008    | Clec7a        | 0.269445 | 1 | 0.771463 | 2.14251  | 3.49969 | No change |
| NM_018861    | Slc1a4        | 0.269541 | 1 | 0.610617 | 2.87577  | 4.1875  | No change |
| NM_008326    | Irgm1         | 0.269703 | 1 | 0.522967 | 9.51354  | 13.0236 | No change |
| NM_133838    | Ehd4          | 0.269901 | 1 | 0.545766 | 5.22646  | 7.27024 | No change |
| NM_008032    | Aff2          | 0.269962 | 1 | 0.720034 | 1.38267  | 2.17645 | No change |
| NM_146043    | Spin1         | 0.269977 | 1 | 0.58334  | 12.7072  | 18.1502 | No change |
| NM_013660    | Sema4d        | 0.269996 | 1 | 0.673282 | 1.79925  | 2.73911 | No change |
| NR_015479    | C230091D08Rik | 0.270051 | 1 | 0.509783 | 6.40919  | 8.69314 | No change |
| NM_030116    | Mrpl9         | 0.270242 | 1 | 0.511666 | 14.6264  | 19.8647 | No change |
| NM_011898    | Spry4         | 0.270475 | 1 | 0.92121  | 0.592162 | 1.07921 | No change |
| NM_028018    | 2400003C14Rik | 0.270565 | 1 | 0.407973 | 32.079   | 40.5242 | No change |
| NM_001033271 | Tmem55b       | 0.270834 | 1 | 0.428658 | 20.5307  | 26.3121 | No change |
| NM_029389    | Fam35a        | 0.270839 | 1 | 0.572665 | 4.23972  | 6.01031 | No change |
| NM_001081295 | Arhgef26      | 0.271023 | 1 | 0.714247 | 1.23184  | 1.93098 | No change |
| NM_020273    | Gmeb1         | 0.271135 | 1 | 0.552256 | 2.60894  | 3.64572 | No change |
| NM_021304    | Abhd1         | 0.271248 | 1 | 0.681223 | 5.79004  | 8.86443 | No change |
| NM_020581    | Angptl4       | 0.271383 | 1 | 0.961852 | 1.24517  | 2.33896 | No change |
| NM_008709    | Mycn          | 0.271571 | 1 | 0.888788 | 1.18124  | 2.10174 | No change |
| NM_001082553 | Rab27b        | 0.272078 | 1 | 0.845366 | 0.527055 | 0.90835 | No change |
| NM_011334    | Clcn4-2       | 0.272263 | 1 | 0.406977 | 17.0807  | 21.5624 | No change |
| NM_025305    | Mrps7         | 0.272443 | 1 | 0.519847 | 16.7916  | 22.9362 | No change |
| NM_026417    | Yipf4         | 0.272443 | 1 | 0.519847 | 10.4229  | 14.237  | No change |
| NM_008737    | Nrp1          | 0.272671 | 1 | 0.511969 | 4.02618  | 5.46921 | No change |
| NM_026082    | Dock7         | 0.272711 | 1 | 0.366853 | 23.0661  | 28.3168 | No change |
| NM_028990    | Tmem168       | 0.272763 | 1 | 0.464041 | 8.35151  | 10.9707 | No change |
| NM_013659    | Sema4b        | 0.272903 | 1 | 0.557284 | 4.20348  | 5.89465 | No change |
| NM_172154    | Lcor          | 0.273102 | 1 | 0.565139 | 3.36284  | 4.74193 | No change |
| NM_146054    | Fermt2        | 0.27325  | 1 | 0.463838 | 11.7982  | 15.496  | No change |
| NM_001162884 | Igsf10        | 0.273682 | 1 | 0.560903 | 1.61032  | 2.26394 | No change |
| NM_009875    | Cdkn1b        | 0.27378  | 1 | 0.528892 | 8.66453  | 11.9104 | No change |
| NM_133926    | Camk1         | 0.273825 | 1 | 0.629396 | 7.19286  | 10.6134 | No change |
| NM_025679    | Sike1         | 0.273922 | 1 | 0.551702 | 6.22703  | 8.69805 | No change |
| NM_021542    | Kcnk5         | 0.274088 | 1 | 0.503598 | 7.72755  | 10.4357 | No change |
| NM_001159571 | Ephb4         | 0.274206 | 1 | 0.76952  | 1.15063  | 1.87667 | No change |
| NM_053100    | Trim8         | 0.274208 | 1 | 0.663193 | 2.62343  | 3.96501 | No change |
| NM_001081378 | Kidins220     | 0.274533 | 1 | 0.402832 | 11.6657  | 14.6841 | No change |
| NM_001039039 | Kctd21        | 0.27498  | 1 | 0.752589 | 1.82847  | 2.94601 | No change |
| NM_008683    | Neddb8        | 0.275217 | 1 | 0.433981 | 92.6152  | 119.135 | No change |
| NM_016709    | Auh           | 0.275305 | 1 | 0.627479 | 7.82426  | 11.5293 | No change |
| NM_025793    | Wdr45l        | 0.275453 | 1 | 0.482286 | 13.7661  | 18.3153 | No change |
| NM_026303    | Alkbh8        | 0.275545 | 1 | 0.744987 | 2.48794  | 3.98663 | No change |
| NM_001111066 | Fkbp8         | 0.275646 | 1 | 0.408341 | 47.28    | 59.7415 | No change |
| NM_001017983 | Foxred2       | 0.275882 | 1 | 0.533808 | 4.24585  | 5.85651 | No change |
| NM_172585    | Larp4b        | 0.276083 | 1 | 0.419828 | 14.5838  | 18.5756 | No change |
| NM_023126    | Rab8a         | 0.276173 | 1 | 0.488815 | 15.1371  | 20.2314 | No change |
| NM_011977    | Slc27a1       | 0.276276 | 1 | 0.456743 | 15.31    | 20.009  | No change |
| NM_008880    | Plscr2        | 0.276341 | 1 | 0.881194 | 1.69175  | 2.99287 | No change |
| NM_053143    | Pcdhb18       | 0.276341 | 1 | 0.881194 | 0.636213 | 1.12552 | No change |
| NM_173740    | Maoa          | 0.276343 | 1 | 0.708598 | 1.62466  | 2.53623 | No change |
| NM_028181    | Ccp1          | 0.276382 | 1 | 0.407682 | 30.6203  | 38.6731 | No change |
| NM_001033433 | Tmem102       | 0.276732 | 1 | 0.689884 | 3.84191  | 5.91785 | No change |



|              |               |          |   |          |          |          |           |
|--------------|---------------|----------|---|----------|----------|----------|-----------|
| NM_029649    | Tmem101       | 0.276732 | 1 | 0.689884 | 4.73169  | 7.28842  | No change |
| NR_004442    | LOC100042049  | 0.276786 | 1 | 0.490824 | 37.0835  | 49.6333  | No change |
| NM_025486    | Tmem208       | 0.276821 | 1 | 0.642783 | 12.4998  | 18.6193  | No change |
| NM_008381    | Inhbb         | 0.27693  | 1 | 0.483288 | 7.61627  | 10.1402  | No change |
| NM_009883    | Cebpb         | 0.276936 | 1 | 0.84029  | 2.50227  | 4.296    | No change |
| NM_025437    | Eif1ax        | 0.276978 | 1 | 0.51815  | 25.2882  | 34.5     | No change |
| NM_001161724 | Ilk           | 0.277311 | 1 | 0.478713 | 18.9649  | 25.1688  | No change |
| NM_007993    | Fbn1          | 0.277396 | 1 | 0.482891 | 3.30161  | 4.39448  | No change |
| NM_001164745 | Ptp4a2        | 0.27744  | 1 | 0.386129 | 35.7944  | 44.535   | No change |
| NM_001081344 | Stxbp5        | 0.277519 | 1 | 0.456966 | 4.7696   | 6.23444  | No change |
| NR_027656    | Gm9786        | 0.277594 | 1 | 0.456344 | 45.3511  | 59.2537  | No change |
| NM_027143    | Khynyn        | 0.27778  | 1 | 0.55973  | 4.35131  | 6.11223  | No change |
| NM_145984    | Prepl         | 0.278038 | 1 | 0.446311 | 14.5587  | 18.889   | No change |
| NM_172584    | Itpk1         | 0.27825  | 1 | 0.424737 | 23.0114  | 29.4102  | No change |
| NM_001013806 | Ankrd13c      | 0.27832  | 1 | 0.530063 | 8.06169  | 11.0905  | No change |
| NM_013671    | Sod2          | 0.278332 | 1 | 0.423183 | 17.5873  | 22.4535  | No change |
| NM_001130525 | Lzts2         | 0.278448 | 1 | 0.520253 | 8.37017  | 11.436   | No change |
| NM_172627    | Pggt1b        | 0.27846  | 1 | 0.512682 | 9.09371  | 12.3588  | No change |
| NM_010173    | Faah          | 0.278468 | 1 | 0.429882 | 16.09    | 20.638   | No change |
| NM_001162977 | Megf6         | 0.278803 | 1 | 0.767679 | 0.75004  | 1.22157  | No change |
| NM_021366    | Kif13         | 0.278838 | 1 | 0.576305 | 2.35361  | 3.34486  | No change |
| NR_037569    | 1810026B05Rik | 0.278853 | 1 | 0.460252 | 8.22547  | 10.7763  | No change |
| NM_133947    | Numa1         | 0.278934 | 1 | 0.387998 | 16.7972  | 20.9261  | No change |
| NM_001024703 | Mctp2         | 0.279044 | 1 | 0.797381 | 0.782526 | 1.30213  | No change |
| NM_028716    | Phf19         | 0.279044 | 1 | 0.797381 | 1.21027  | 2.01391  | No change |
| NM_010875    | Ncam1         | 0.279165 | 1 | 0.479331 | 7.06203  | 9.37618  | No change |
| NM_007396    | Acvr2a        | 0.279458 | 1 | 0.463347 | 7.23796  | 9.50305  | No change |
| NM_134469    | Fdps          | 0.279555 | 1 | 0.473397 | 30.1452  | 39.8578  | No change |
| NM_021485    | Rps6kb2       | 0.279579 | 1 | 0.809    | 2.89803  | 4.8631   | No change |
| NM_144937    | Usp3          | 0.279746 | 1 | 0.483089 | 15.1672  | 20.1902  | No change |
| NM_011394    | Slc20a2       | 0.279905 | 1 | 0.528892 | 5.98239  | 8.22319  | No change |
| NM_134150    | Otub1         | 0.279923 | 1 | 0.438665 | 33.2049  | 42.852   | No change |
| NM_024166    | Chchd2        | 0.280222 | 1 | 0.404452 | 101.17   | 127.488  | No change |
| NM_198011    | E430018J23Rik | 0.280244 | 1 | 0.643588 | 4.54309  | 6.77085  | No change |
| NM_001164676 | Zfp229        | 0.280415 | 1 | 0.612403 | 2.63312  | 3.83858  | No change |
| NM_010581    | Cd47          | 0.280497 | 1 | 0.570984 | 8.26557  | 11.7026  | No change |
| NM_001164679 | Ano8          | 0.280544 | 1 | 0.737001 | 1.59531  | 2.54144  | No change |
| NM_028761    | Parn          | 0.28058  | 1 | 0.48943  | 10.879   | 14.5462  | No change |
| NM_146107    | Actr1b        | 0.280894 | 1 | 0.469276 | 18.8241  | 24.8175  | No change |
| NM_030563    | N4bp1         | 0.280952 | 1 | 0.478952 | 5.45133  | 7.2357   | No change |
| NM_012011    | Eif2s3y       | 0.281116 | 1 | 0.500464 | 16.1315  | 21.7364  | No change |
| NM_028753    | Pop7          | 0.28121  | 1 | 0.730526 | 7.83166  | 12.4184  | No change |
| NM_029092    | Rg9mtd1       | 0.281317 | 1 | 0.579981 | 8.07925  | 11.5114  | No change |
| NM_007955    | Ptprv         | 0.281884 | 1 | 0.502767 | 4.61945  | 6.23448  | No change |
| NM_010123    | Eif3a         | 0.282256 | 1 | 0.347566 | 65.6805  | 79.5582  | No change |
| NM_001163663 | Rab6          | 0.282429 | 1 | 0.438935 | 17.8244  | 23.0071  | No change |
| NM_009531    | Xpc           | 0.28249  | 1 | 0.503613 | 7.71594  | 10.4197  | No change |
| NM_172505    | A730008H23Rik | 0.282501 | 1 | 0.419215 | 34.1077  | 43.4243  | No change |
| NM_001024945 | Qsox1         | 0.282674 | 1 | 0.38853  | 37.9465  | 47.291   | No change |
| NM_007757    | Cpox          | 0.282696 | 1 | 0.671186 | 2.6704   | 4.05853  | No change |
| NM_172790    | Ankrd52       | 0.282779 | 1 | 0.602602 | 1.94908  | 2.82172  | No change |
| NM_001110150 | Mgat1         | 0.283021 | 1 | 0.530019 | 8.28626  | 11.3988  | No change |
| NM_145955    | Mcmbp         | 0.283131 | 1 | 0.456952 | 11.1093  | 14.5207  | No change |
| NM_021431    | Nudt11        | 0.283296 | 1 | 0.784287 | 1.8599   | 3.06542  | No change |
| NM_173776    | Mam12         | 0.283607 | 1 | 0.794576 | 1.04884  | 1.74156  | No change |
| NM_008540    | Smad4         | 0.283774 | 1 | 0.469999 | 11.9736  | 15.7936  | No change |
| NM_178664    | B3gnt11       | 0.283949 | 1 | 0.578618 | 5.37792  | 7.65502  | No change |
| NM_001159525 | Pex19         | 0.284045 | 1 | 0.46018  | 15.7206  | 20.5943  | No change |
| NM_177906    | Opcml         | 0.284076 | 1 | 1.74612  | 0.104679 | 0.359434 | No change |
| NM_026842    | Ubqln1        | 0.284092 | 1 | 0.379774 | 42.4851  | 52.6259  | No change |
| NM_027181    | Pin4          | 0.284161 | 1 | 0.805733 | 9.39021  | 15.7184  | No change |
| NM_001081412 | Bcr           | 0.284168 | 1 | 0.515105 | 3.9127   | 5.32639  | No change |
| NM_175185    | Hsd1l         | 0.284229 | 1 | 0.483461 | 10.9741  | 14.6119  | No change |
| NM_145418    | BC013529      | 0.284345 | 1 | 0.499092 | 19.113   | 25.7286  | No change |
| NM_016676    | Rab10         | 0.284382 | 1 | 0.418955 | 22.2192  | 28.2831  | No change |
| NM_009688    | Xiap          | 0.28447  | 1 | 0.51692  | 3.85173  | 5.25006  | No change |
| NM_013791    | Mkln1         | 0.284604 | 1 | 0.46584  | 10.6612  | 14.0217  | No change |
| NM_206856    | Tacc2         | 0.284723 | 1 | 0.612034 | 3.14029  | 4.57654  | No change |
| NM_001081278 | Tbc1d4        | 0.284746 | 1 | 0.490003 | 4.92185  | 6.58345  | No change |
| NM_177633    | Ubxn7         | 0.284957 | 1 | 0.412692 | 8.41611  | 10.6664  | No change |
| NM_183208    | Zmiz1         | 0.285139 | 1 | 0.52364  | 3.1767   | 4.35039  | No change |
| NM_011675    | Uck1          | 0.285158 | 1 | 0.551098 | 9.75201  | 13.6149  | No change |
| NM_026533    | Rps13         | 0.285172 | 1 | 0.477618 | 64.1846  | 85.113   | No change |
| NM_025539    | Nudt2         | 0.285348 | 1 | 0.729844 | 7.47884  | 11.8523  | No change |
| NM_010146    | Epm2a         | 0.28545  | 1 | 1.11385  | 1.42099  | 2.99406  | No change |
| NR_015455    | BC064078      | 0.28548  | 1 | 0.867694 | 4.14839  | 7.26456  | No change |

|              |               |          |   |          |          |          |           |
|--------------|---------------|----------|---|----------|----------|----------|-----------|
| NM_029348    | Zbtb4         | 0.285651 | 1 | 0.458395 | 5.96808  | 7.80855  | No change |
| NM_011240    | Ranbp2        | 0.285796 | 1 | 0.349155 | 38.1046  | 46.2065  | No change |
| NM_030733    | Gpr63         | 0.285798 | 1 | 0.966298 | 1.02922  | 1.93866  | No change |
| NM_029884    | Hgsnat        | 0.285833 | 1 | 0.482006 | 13.3975  | 17.8205  | No change |
| NM_009269    | Sptlc1        | 0.286135 | 1 | 0.467183 | 16.5005  | 21.7218  | No change |
| NM_010663    | Krt17         | 0.286147 | 1 | 1.18786  | 0.830227 | 1.85298  | No change |
| NM_021560    | Bhlhe22       | 0.286147 | 1 | 1.18786  | 0.393252 | 0.877695 | No change |
| NM_010142    | Ephb2         | 0.286177 | 1 | 0.831125 | 0.846001 | 1.44243  | No change |
| NM_026787    | 1110012L19Rik | 0.286253 | 1 | 0.698817 | 7.05501  | 10.935   | No change |
| NM_010093    | E2f3          | 0.286257 | 1 | 0.661918 | 1.79121  | 2.70431  | No change |
| NM_010251    | Gabra4        | 0.286315 | 1 | 0.614425 | 2.9581   | 4.31825  | No change |
| NM_146090    | Zadh2         | 0.286466 | 1 | 0.653125 | 2.896    | 4.34507  | No change |
| NM_001177882 | Mfap3l        | 0.286584 | 1 | 0.369035 | 33.8872  | 41.6636  | No change |
| NM_207214    | Exoc5         | 0.286799 | 1 | 0.442736 | 12.3709  | 16.01    | No change |
| NM_008874    | Plcb3         | 0.28694  | 1 | 0.490053 | 7.95779  | 10.6446  | No change |
| NM_008180    | Gss           | 0.287078 | 1 | 0.605879 | 6.98055  | 10.1288  | No change |
| NM_001110311 | Snx12         | 0.287204 | 1 | 0.694478 | 6.82048  | 10.5387  | No change |
| NM_146087    | Csnk1a1       | 0.287283 | 1 | 0.421387 | 39.0184  | 49.7508  | No change |
| NM_023230    | Ube2v1        | 0.28733  | 1 | 0.461935 | 23.4097  | 30.7044  | No change |
| NM_008506    | Mycl1         | 0.287491 | 1 | 0.713031 | 1.99351  | 3.12135  | No change |
| NM_153556    | Pms1          | 0.287491 | 1 | 0.713031 | 2.29934  | 3.60021  | No change |
| NM_029053    | 4930451C15Rik | 0.287534 | 1 | 0.772818 | 2.34288  | 3.82928  | No change |
| NM_011215    | Ptprn2        | 0.28755  | 1 | 0.76427  | 1.15957  | 1.88359  | No change |
| NM_013851    | Abca8b        | 0.28755  | 1 | 0.76427  | 0.879904 | 1.42931  | No change |
| NM_019802    | Ggcx          | 0.287597 | 1 | 0.613033 | 4.27918  | 6.24054  | No change |
| NM_153062    | Slc37a1       | 0.287671 | 1 | 0.650608 | 3.35268  | 5.0212   | No change |
| NM_178644    | Oaf           | 0.288333 | 1 | 0.886444 | 1.37168  | 2.43512  | No change |
| NM_011019    | Osmr          | 0.288674 | 1 | 0.560212 | 3.76212  | 5.28595  | No change |
| NM_033596    | Hist2h4       | 0.288822 | 1 | 0.735343 | 18.024   | 28.6751  | No change |
| NM_139234    | Fgd4          | 0.288858 | 1 | 0.611685 | 5.25382  | 7.65451  | No change |
| NM_026965    | Comtd1        | 0.289558 | 1 | 0.619279 | 5.38013  | 7.88067  | No change |
| NM_033477    | D17H6S53E     | 0.289994 | 1 | 0.698817 | 3.57316  | 5.53797  | No change |
| NM_001081351 | A430107O13Rik | 0.290023 | 1 | 0.548656 | 4.11214  | 5.73097  | No change |
| NM_001171000 | Ahcyl2        | 0.290569 | 1 | 0.46759  | 8.52726  | 11.2286  | No change |
| NM_001161825 | Pex7          | 0.290671 | 1 | 0.510208 | 15.6195  | 21.1894  | No change |
| NM_001146687 | Pip5k1c       | 0.290731 | 1 | 0.551494 | 4.71145  | 6.57927  | No change |
| NM_028651    | Tmtc4         | 0.290849 | 1 | 0.533231 | 6.80483  | 9.38153  | No change |
| NM_010515    | Igf2r         | 0.290851 | 1 | 0.415056 | 10.2795  | 13.0492  | No change |
| NM_001170485 | Arpc4         | 0.291002 | 1 | 0.521997 | 12.5037  | 17.1031  | No change |
| NM_001099792 | Trmt61a       | 0.291141 | 1 | 0.679135 | 3.98993  | 6.09768  | No change |
| NM_001040631 | C1qtnf5       | 0.291309 | 1 | 0.556077 | 15.2228  | 21.3263  | No change |
| NM_001077353 | Gsta3         | 0.291309 | 1 | 0.556077 | 13.2176  | 18.5171  | No change |
| NM_008332    | Ifit2         | 0.292048 | 1 | 0.747727 | 1.51775  | 2.43606  | No change |
| NM_008892    | Pola1         | 0.292275 | 1 | 0.557461 | 3.57132  | 5.00805  | No change |
| NM_199195    | Bckdhh        | 0.292289 | 1 | 0.78942  | 3.53948  | 5.8542   | No change |
| NM_001127261 | Trp63         | 0.29237  | 1 | 0.740943 | 2.60726  | 4.16442  | No change |
| NM_001198831 | Ddr1          | 0.292489 | 1 | 0.57888  | 4.4734   | 6.36824  | No change |
| NM_021513    | Thap11        | 0.292527 | 1 | 0.583695 | 8.48534  | 12.1206  | No change |
| NM_175331    | Nt5dc3        | 0.292542 | 1 | 0.517665 | 4.51974  | 6.16351  | No change |
| NM_019877    | Copz2         | 0.292544 | 1 | 0.87939  | 3.67595  | 6.49133  | No change |
| NM_001081232 | D5Erd579e     | 0.292617 | 1 | 0.430866 | 11.2107  | 14.3888  | No change |
| NM_025818    | 1200014J11Rik | 0.292629 | 1 | 0.570135 | 2.76154  | 3.90715  | No change |
| NM_080445    | B3galt6       | 0.292699 | 1 | 0.686643 | 2.55953  | 3.93253  | No change |
| NM_177366    | Gpr157        | 0.292699 | 1 | 0.686643 | 1.72696  | 2.65334  | No change |
| NM_025868    | Tmx2          | 0.292755 | 1 | 0.483773 | 19.2293  | 25.6084  | No change |
| NM_172524    | Nipal4        | 0.293032 | 1 | 0.941674 | 0.824894 | 1.52515  | No change |
| NM_145541    | Rap1a         | 0.293125 | 1 | 0.549529 | 14.7196  | 20.5264  | No change |
| NM_022563    | Ddr2          | 0.293186 | 1 | 0.5091   | 3.53929  | 4.79761  | No change |
| NM_019441    | Ppt2          | 0.293299 | 1 | 0.541393 | 12.9061  | 17.895   | No change |
| NM_001102424 | Stx16         | 0.293629 | 1 | 0.454695 | 14.6005  | 19.0533  | No change |
| NM_001033253 | Plekhg1       | 0.293681 | 1 | 0.448452 | 8.1239   | 10.5554  | No change |
| NM_133897    | Lrrc8c        | 0.293713 | 1 | 0.571705 | 6.10953  | 8.65349  | No change |
| NM_026725    | Dusp23        | 0.293796 | 1 | 0.722903 | 4.81998  | 7.59961  | No change |
| NM_030743    | Rnf114        | 0.293804 | 1 | 0.444188 | 20.6455  | 26.7452  | No change |
| NM_173371    | H6pd          | 0.29396  | 1 | 0.454115 | 11.4856  | 14.9823  | No change |
| NM_026647    | Zdhc21        | 0.293987 | 1 | 0.448392 | 6.70569  | 8.71238  | No change |
| NM_178899    | Hepacam2      | 0.29401  | 1 | 0.66025  | 4.30126  | 6.48559  | No change |
| NM_178599    | Commd8        | 0.29407  | 1 | 0.524956 | 7.36363  | 10.093   | No change |
| NM_080635    | Eif3h         | 0.294128 | 1 | 0.420492 | 72.0766  | 91.8433  | No change |
| NM_133225    | Acbd3         | 0.29413  | 1 | 0.46972  | 12.9708  | 17.1049  | No change |
| NM_028385    | Setd5         | 0.294226 | 1 | 0.42088  | 13.6154  | 17.3541  | No change |
| NM_009409    | Top2b         | 0.294387 | 1 | 0.468156 | 8.16569  | 10.7565  | No change |
| NM_001099217 | Ly6c2         | 0.294836 | 1 | 0.823075 | 5.39446  | 9.14192  | No change |
| NM_001162410 | Chuk          | 0.29489  | 1 | 0.448216 | 17.0881  | 22.1989  | No change |
| NM_023587    | Ptplb         | 0.295    | 1 | 0.476958 | 11.6058  | 15.3824  | No change |
| NM_001081366 | Vps8          | 0.295368 | 1 | 0.595388 | 2.92234  | 4.20873  | No change |

|              |               |          |   |          |          |          |           |
|--------------|---------------|----------|---|----------|----------|----------|-----------|
| NR_003248    | Foxl2os       | 0.295404 | 1 | 1.80191  | 0.149395 | 0.538625 | No change |
| NM_001003948 | Pid1          | 0.295715 | 1 | 0.707695 | 2.79608  | 4.36076  | No change |
| NM_026719    | Lmbrd1        | 0.295941 | 1 | 0.516339 | 5.20888  | 7.09655  | No change |
| NM_001145780 | Use1          | 0.296214 | 1 | 0.487641 | 35.271   | 47.0981  | No change |
| NM_009227    | Snrpe         | 0.296222 | 1 | 0.589079 | 31.4468  | 45.0882  | No change |
| NM_001081371 | Dmxl1         | 0.296268 | 1 | 0.394082 | 12.5933  | 15.7549  | No change |
| NM_133930    | Creld1        | 0.29643  | 1 | 0.703143 | 3.76904  | 5.85905  | No change |
| NR_027985    | 4632415L05Rik | 0.296467 | 1 | 0.672889 | 2.20226  | 3.35048  | No change |
| NR_028078    | Snora21       | 0.296538 | 1 | 1.52889  | 5.98924  | 17.3869  | No change |
| NM_025809    | Clec14a       | 0.296562 | 1 | 0.984572 | 0.522044 | 0.996438 | No change |
| NM_023556    | Mvk           | 0.297017 | 1 | 0.796998 | 2.94063  | 4.88992  | No change |
| NM_001172136 | Exog          | 0.297174 | 1 | 0.698817 | 2.02554  | 3.13901  | No change |
| NM_009502    | Vcl           | 0.297441 | 1 | 0.433405 | 14.5543  | 18.7132  | No change |
| NM_010508    | Ifnar1        | 0.297851 | 1 | 0.477993 | 6.08186  | 8.06663  | No change |
| NM_011467    | Spr           | 0.29794  | 1 | 0.694701 | 6.59411  | 10.1889  | No change |
| NM_011383    | Six5          | 0.298066 | 1 | 0.717196 | 2.51608  | 3.95064  | No change |
| NM_001110205 | Acvr1         | 0.298188 | 1 | 0.658175 | 3.59009  | 5.40501  | No change |
| NM_010113    | Egf           | 0.298191 | 1 | 0.542068 | 4.7761   | 6.62523  | No change |
| NM_001017426 | Kdm6b         | 0.298254 | 1 | 0.582664 | 2.47555  | 3.53336  | No change |
| NM_010461    | Hoxb8         | 0.298887 | 1 | 0.60862  | 5.19074  | 7.54552  | No change |
| NM_134000    | Traf3ip2      | 0.298922 | 1 | 0.595478 | 5.25067  | 7.56222  | No change |
| NM_025454    | Ing5          | 0.299353 | 1 | 0.540722 | 5.11409  | 7.08734  | No change |
| NM_172740    | Zfp420        | 0.299768 | 1 | 0.76753  | 1.6932   | 2.75622  | No change |
| NM_175455    | Ankrd34b      | 0.299784 | 1 | 1.28378  | 0.265328 | 0.637737 | No change |
| NM_001190332 | Frmd7         | 0.299819 | 1 | 0.745612 | 1.34977  | 2.16284  | No change |
| NM_009907    | Cln3          | 0.299834 | 1 | 0.553921 | 8.77397  | 12.2725  | No change |
| NM_176831    | Ppcdc         | 0.299834 | 1 | 0.553921 | 7.57477  | 10.5951  | No change |
| NM_144959    | Hltf          | 0.300111 | 1 | 0.61909  | 4.21484  | 6.17229  | No change |
| NM_178087    | Pml           | 0.30018  | 1 | 0.65322  | 1.93123  | 2.89727  | No change |
| NM_011512    | Surf4         | 0.300294 | 1 | 0.373512 | 93.6704  | 115.523  | No change |
| NM_001145931 | Yeats2        | 0.300344 | 1 | 0.73311  | 2.85067  | 4.52708  | No change |
| NM_138594    | D6Wsu163e     | 0.300428 | 1 | 0.784791 | 2.33555  | 3.84938  | No change |
| NM_001001806 | Zfp36l2       | 0.300468 | 1 | 0.600253 | 4.16342  | 6.01646  | No change |
| NM_023343    | Ilkap         | 0.300674 | 1 | 0.538271 | 17.5251  | 24.2452  | No change |
| NR_028549    | Snord37       | 0.300732 | 1 | 0.555189 | 391.858  | 548.591  | No change |
| NM_001003817 | Erbp2         | 0.300736 | 1 | 0.614155 | 2.67728  | 3.90699  | No change |
| NM_001077266 | Hnrnpd        | 0.300947 | 1 | 0.473779 | 6.87332  | 9.08948  | No change |
| NM_178389    | Gale          | 0.301031 | 1 | 0.794395 | 3.26473  | 5.41819  | No change |
| NM_001038587 | Adar          | 0.301221 | 1 | 0.50388  | 5.64091  | 7.61824  | No change |
| NM_013770    | Slc25a10      | 0.301274 | 1 | 0.494459 | 9.21689  | 12.366   | No change |
| NM_133828    | Creb1         | 0.301344 | 1 | 0.468546 | 5.93043  | 7.81398  | No change |
| NM_007754    | Cpd           | 0.301356 | 1 | 0.397859 | 16.7227  | 20.9756  | No change |
| NM_007841    | Ddx6          | 0.301405 | 1 | 0.406861 | 21.2628  | 26.838   | No change |
| NM_028259    | Rps6kb1       | 0.301668 | 1 | 0.585359 | 5.03114  | 7.1944   | No change |
| NM_173430    | Fkrp          | 0.302224 | 1 | 0.625236 | 4.47068  | 6.5753   | No change |
| NM_008743    | Nthl1         | 0.302577 | 1 | 1.11385  | 1.4842   | 3.12424  | No change |
| NM_001043335 | Eml1          | 0.302744 | 1 | 0.707379 | 1.8596   | 2.89925  | No change |
| NM_080461    | Zfp358        | 0.302831 | 1 | 0.629243 | 6.13605  | 9.05019  | No change |
| NM_172904    | Fsd2          | 0.302944 | 1 | 1.06139  | 0.632295 | 1.27854  | No change |
| NM_026637    | Ggct          | 0.30298  | 1 | 0.541492 | 17.4488  | 24.1939  | No change |
| NM_144897    | Apoa1bp       | 0.30308  | 1 | 0.50021  | 39.0434  | 52.5938  | No change |
| NM_001167680 | Rhbdf2        | 0.303138 | 1 | 0.65383  | 2.88714  | 4.33306  | No change |
| NM_134082    | Farp1         | 0.303253 | 1 | 0.639682 | 2.36758  | 3.51786  | No change |
| NM_026899    | Ssu72         | 0.30331  | 1 | 0.571328 | 12.8243  | 18.158   | No change |
| NM_001083807 | Rusc1         | 0.303325 | 1 | 0.661866 | 2.97798  | 4.49492  | No change |
| NM_023644    | Mccc1         | 0.303397 | 1 | 0.594694 | 5.24042  | 7.54299  | No change |
| NM_011638    | Tfrc          | 0.303429 | 1 | 0.496548 | 7.50256  | 10.0805  | No change |
| NM_001167976 | Slc25a21      | 0.303599 | 1 | 0.765932 | 2.6706   | 4.34193  | No change |
| NM_007958    | Smarcad1      | 0.303668 | 1 | 0.554427 | 4.19689  | 5.87227  | No change |
| NM_020047    | Tacstd2       | 0.303687 | 1 | 0.884373 | 1.97542  | 3.50001  | No change |
| NM_024237    | Fbln7         | 0.303764 | 1 | 1.14628  | 0.503112 | 1.08587  | No change |
| NM_029564    | Tax1bp3       | 0.303847 | 1 | 0.627626 | 8.80384  | 12.97    | No change |
| NM_025345    | 0610037P05Rik | 0.303854 | 1 | 0.514196 | 21.7117  | 29.5343  | No change |
| NM_026229    | Gpr89         | 0.3039   | 1 | 0.497183 | 20.8487  | 28.0249  | No change |
| NM_030241    | Setd8         | 0.303923 | 1 | 0.509412 | 11.8361  | 16.0468  | No change |
| NM_009371    | Tgfb2         | 0.304206 | 1 | 0.539074 | 5.12362  | 7.09213  | No change |
| NM_029742    | Klhdc10       | 0.304213 | 1 | 0.438893 | 13.1615  | 16.9867  | No change |
| NM_024210    | 2310033P09Rik | 0.304292 | 1 | 0.726832 | 5.67203  | 8.96664  | No change |
| NM_178801    | 6030446N20Rik | 0.304292 | 1 | 0.726832 | 2.77672  | 4.38959  | No change |
| NM_007387    | Acp2          | 0.304606 | 1 | 0.505749 | 7.27934  | 9.84368  | No change |
| NM_031393    | Sytl1         | 0.304649 | 1 | 0.694837 | 4.34449  | 6.71292  | No change |
| NM_009105    | Rsu1          | 0.305279 | 1 | 0.620815 | 9.32859  | 13.6769  | No change |
| NM_153775    | Ctu2          | 0.305318 | 1 | 0.61255  | 4.54618  | 6.6265   | No change |
| NM_145452    | Rasa1         | 0.305329 | 1 | 0.413415 | 23.7866  | 30.1604  | No change |
| NM_019701    | Clnkb         | 0.3056   | 1 | 0.711756 | 3.27616  | 5.12354  | No change |
| NM_001168256 | Tmem40        | 0.30573  | 1 | 1.18424  | 0.941796 | 2.09348  | No change |

|                |               |          |   |          |          |          |           |
|----------------|---------------|----------|---|----------|----------|----------|-----------|
| NM_133819      | Ppp1r15b      | 0.305809 | 1 | 0.442453 | 13.4447  | 17.3953  | No change |
| NM_026864      | Rasl11a       | 0.305844 | 1 | 1.02075  | 1.91872  | 3.76169  | No change |
| NM_174989      | Ticam1        | 0.305955 | 1 | 0.674034 | 3.3492   | 5.09893  | No change |
| NM_001163557   | Ppfibp2       | 0.306005 | 1 | 0.640401 | 3.04121  | 4.52094  | No change |
| NM_001161458   | Cbfb          | 0.306052 | 1 | 0.500878 | 12.417   | 16.734   | No change |
| NM_001162485   | Arrdc1        | 0.306231 | 1 | 0.589724 | 9.74468  | 13.977   | No change |
| NM_009462      | Usp10         | 0.306231 | 1 | 0.589724 | 5.10421  | 7.32108  | No change |
| NM_001040396   | 2810407C02Rik | 0.306605 | 1 | 0.431337 | 25.5305  | 32.7777  | No change |
| NM_001085355   | Arid1b        | 0.306633 | 1 | 0.48375  | 3.88927  | 5.17909  | No change |
| NM_001081326   | Agl           | 0.306641 | 1 | 0.506731 | 3.55524  | 4.81093  | No change |
| NM_198652      | Hjurp         | 0.306812 | 1 | 0.387633 | 25.9563  | 32.3268  | No change |
| NM_013545      | Ptpn6         | 0.306825 | 1 | 0.623075 | 5.95829  | 8.74942  | No change |
| NM_023821      | Cmya5         | 0.30684  | 1 | 0.812685 | 0.399993 | 0.672586 | No change |
| NM_008112      | Gdi2          | 0.306863 | 1 | 0.400122 | 61.0886  | 76.7448  | No change |
| NM_133797      | 4833439L19Rik | 0.307192 | 1 | 0.435082 | 32.174   | 41.4148  | No change |
| NM_023544      | Rsc1a1        | 0.307242 | 1 | 0.543289 | 11.2596  | 15.6314  | No change |
| NM_001025947   | Dnm1          | 0.307392 | 1 | 0.407549 | 35.2366  | 44.4965  | No change |
| NM_020046      | Dhodh         | 0.307569 | 1 | 0.668229 | 4.26937  | 6.47296  | No change |
| NM_001033530   | AW146154      | 0.307747 | 1 | 0.613426 | 4.12723  | 6.01941  | No change |
| NM_027188      | Smyd3         | 0.307827 | 1 | 0.649908 | 2.94634  | 4.40939  | No change |
| NM_175285      | Tmem62        | 0.308112 | 1 | 0.721116 | 2.57762  | 4.05797  | No change |
| NM_178695      | Prrg4         | 0.308214 | 1 | 0.824348 | 1.59172  | 2.6991   | No change |
| NM_026030      | Eif2s2        | 0.308306 | 1 | 0.440261 | 32.087   | 41.4519  | No change |
| NR_033299      | 9530091C08Rik | 0.308383 | 1 | 0.665497 | 1.26683  | 1.91695  | No change |
| NM_001013792   | Fam105b       | 0.308664 | 1 | 0.580862 | 12.0757  | 17.2125  | No change |
| NM_008254      | Hmgcl         | 0.308705 | 1 | 0.789583 | 3.74852  | 6.19851  | No change |
| NM_152807      | Ccdc137       | 0.308714 | 1 | 0.64777  | 4.09216  | 6.11485  | No change |
| NM_030717      | Lactb         | 0.308818 | 1 | 0.634934 | 6.03937  | 8.94294  | No change |
| NM_001146349   | Rnf217        | 0.308868 | 1 | 0.655001 | 3.77706  | 5.67299  | No change |
| NM_172307      | Mbtps2        | 0.308868 | 1 | 0.655001 | 2.25097  | 3.38086  | No change |
| NM_019678      | Tfg           | 0.309163 | 1 | 0.449941 | 38.1822  | 49.6596  | No change |
| NM_001163430   | Sirt6         | 0.309538 | 1 | 0.799219 | 3.05011  | 5.07874  | No change |
| NM_133985      | Oxsr1         | 0.30961  | 1 | 0.580278 | 9.46895  | 13.4912  | No change |
| NM_028873      | Dnajc14       | 0.309632 | 1 | 0.450533 | 16.661   | 21.6782  | No change |
| NM_011581      | Thbs2         | 0.309837 | 1 | 0.684171 | 1.54167  | 2.36394  | No change |
| NM_207705      | Elmo2         | 0.310207 | 1 | 0.55014  | 7.22296  | 10.0755  | No change |
| NM_016925      | Fanca         | 0.310229 | 1 | 0.495842 | 8.79411  | 11.8097  | No change |
| NM_001161823   | Kdm4a         | 0.310243 | 1 | 0.478011 | 10.6593  | 14.1373  | No change |
| NM_010143      | Ephb3         | 0.31108  | 1 | 0.871654 | 0.907942 | 1.59343  | No change |
| NR_028042      | Gm10012       | 0.311632 | 1 | 0.510014 | 93.486   | 126.792  | No change |
| NM_001033332   | Tmtc3         | 0.312067 | 1 | 0.604841 | 5.52444  | 8.00825  | No change |
| NM_001113527   | Isg20         | 0.312148 | 1 | 0.510708 | 38.9093  | 52.7969  | No change |
| NM_001165894   | Akt1          | 0.312374 | 1 | 0.486424 | 17.2648  | 23.0329  | No change |
| NM_033562      | Derl2         | 0.312506 | 1 | 0.462943 | 16.9856  | 22.2923  | No change |
| NM_007616      | Cav1          | 0.312522 | 1 | 0.528035 | 11.7696  | 16.1652  | No change |
| NM_008494      | Lfng          | 0.312526 | 1 | 1.33625  | 0.42719  | 1.06869  | No change |
| NM_053142      | Pcdhb17       | 0.312636 | 1 | 0.974452 | 0.788575 | 1.4929   | No change |
| NM_133774      | Stard4        | 0.312855 | 1 | 0.68439  | 3.10525  | 4.76201  | No change |
| NM_008397      | Iltga6        | 0.312981 | 1 | 0.603854 | 3.71254  | 5.37792  | No change |
| NM_054089      | Tgs1          | 0.313162 | 1 | 0.632322 | 2.9636   | 4.38013  | No change |
| NM_028810      | Rnd3          | 0.313275 | 1 | 0.651121 | 4.01838  | 6.01856  | No change |
| NM_144873      | Uhrf2         | 0.31348  | 1 | 0.50304  | 10.7947  | 14.5692  | No change |
| NM_153150      | Slc25a1       | 0.313564 | 1 | 0.504645 | 22.3865  | 30.248   | No change |
| NM_007912      | Egfr          | 0.313615 | 1 | 0.832954 | 1.66555  | 2.84161  | No change |
| NM_172144      | Ppp2r3a       | 0.313755 | 1 | 0.50415  | 7.95528  | 10.7453  | No change |
| NM_016776      | Mybbp1a       | 0.313765 | 1 | 0.545778 | 6.09411  | 8.47472  | No change |
| NM_019479      | Hes6          | 0.314259 | 1 | 0.730526 | 5.42926  | 8.60416  | No change |
| NM_001081103   | Stim2         | 0.314286 | 1 | 0.557203 | 4.64146  | 6.50651  | No change |
| NM_026272      | Narf          | 0.314323 | 1 | 0.561618 | 4.97581  | 6.99685  | No change |
| NM_029639      | 1600029D21Rik | 0.314456 | 1 | 0.72529  | 4.03962  | 6.37796  | No change |
| NM_145590      | BC017158      | 0.314467 | 1 | 0.62055  | 5.41278  | 7.93362  | No change |
| NM_021345      | Ptplad1       | 0.314568 | 1 | 0.432979 | 36.7463  | 47.2302  | No change |
| NM_022009      | Flii          | 0.314626 | 1 | 0.458578 | 16.7805  | 21.956   | No change |
| NM_172513      | Fam126b       | 0.314631 | 1 | 0.460357 | 7.5504   | 9.89138  | No change |
| NM_145831      | Dmrt2         | 0.314789 | 1 | 0.768943 | 2.56465  | 4.17782  | No change |
| NM_019809      | Pdlim5        | 0.314892 | 1 | 0.646978 | 4.87706  | 7.28314  | No change |
| NM_177730      | Impad1        | 0.315057 | 1 | 0.444385 | 18.1316  | 23.4904  | No change |
| NM_019694      | Letm1         | 0.315298 | 1 | 0.4885   | 13.2176  | 17.6589  | No change |
| NR_027445      | A230072C01Rik | 0.315342 | 1 | 0.916818 | 1.80308  | 3.27057  | No change |
| NM_001081161   | Fam171a1      | 0.315371 | 1 | 0.567648 | 5.07652  | 7.16871  | No change |
| NM_016906      | Sec61a1       | 0.315419 | 1 | 0.382132 | 106.019  | 131.534  | No change |
| NM_023245      | Palmd         | 0.315753 | 1 | 0.70681  | 3.46427  | 5.39782  | No change |
| NM_001039160_2 | Gvin1         | 0.316009 | 1 | 0.421733 | 14.301   | 18.2379  | No change |
| NM_001170691   | Elmod2        | 0.316056 | 1 | 0.536034 | 5.9559   | 8.22605  | No change |
| NM_001205367   | Sept7         | 0.316258 | 1 | 0.491506 | 17.74    | 23.7506  | No change |
| NM_001004364   | Asap2         | 0.316427 | 1 | 0.637074 | 2.29162  | 3.39824  | No change |

|              |               |          |   |          |          |          |           |
|--------------|---------------|----------|---|----------|----------|----------|-----------|
| NM_030168    | Rictor        | 0.316555 | 1 | 0.466157 | 6.6752   | 8.78019  | No change |
| NM_009543    | Rnf103        | 0.316762 | 1 | 0.556454 | 7.17427  | 10.0516  | No change |
| NM_021429    | Hs1bp3        | 0.316859 | 1 | 0.666827 | 3.55769  | 5.38796  | No change |
| NM_027288    | Manba         | 0.316919 | 1 | 0.563739 | 5.99428  | 8.4414   | No change |
| NM_198003    | Zfp946        | 0.317033 | 1 | 0.656648 | 3.84661  | 5.78364  | No change |
| NM_009190    | Vps4b         | 0.317466 | 1 | 0.467704 | 18.829   | 24.7933  | No change |
| NM_028731    | Esyt2         | 0.317514 | 1 | 0.445909 | 15.3448  | 19.9009  | No change |
| NM_133857    | Usp53         | 0.317646 | 1 | 0.484991 | 12.2926  | 16.3828  | No change |
| NM_022996    | Ndfip1        | 0.317763 | 1 | 0.601899 | 17.479   | 25.2839  | No change |
| NM_139147    | Rab40b        | 0.317815 | 1 | 0.803899 | 2.7653   | 4.61926  | No change |
| NM_001163387 | Nlgn1         | 0.317915 | 1 | 1.06323  | 0.423941 | 0.857811 | No change |
| NM_010934    | Npy1r         | 0.31799  | 1 | 1.39396  | 0.3013   | 0.787862 | No change |
| NR_002896    | Snhg1         | 0.31799  | 1 | 1.39396  | 1.90338  | 4.97711  | No change |
| NR_030675    | D730005E14Rik | 0.31815  | 1 | 0.715305 | 2.22198  | 3.48307  | No change |
| NM_019996    | Phax          | 0.318163 | 1 | 0.590468 | 9.46175  | 13.577   | No change |
| NM_001039723 | Tmem120b      | 0.318519 | 1 | 0.908536 | 1.79853  | 3.24217  | No change |
| NM_001130008 | Gspt1         | 0.318544 | 1 | 0.424948 | 18.2865  | 23.3726  | No change |
| NM_028102    | Ddhd2         | 0.318881 | 1 | 0.509464 | 8.83616  | 11.9792  | No change |
| NM_008214    | Hars          | 0.319036 | 1 | 0.506787 | 19.5519  | 26.4569  | No change |
| NM_080793    | Setd7         | 0.319162 | 1 | 0.548258 | 3.49602  | 4.87     | No change |
| NM_009668    | Bin1          | 0.319168 | 1 | 0.841775 | 1.78845  | 3.07049  | No change |
| NM_026406    | Rnf115        | 0.319199 | 1 | 0.533999 | 12.9847  | 17.9081  | No change |
| NM_011591    | Timm17b       | 0.319243 | 1 | 0.681663 | 5.94577  | 9.09965  | No change |
| NM_001162922 | Zfp931        | 0.319395 | 1 | 0.783209 | 3.21238  | 5.28646  | No change |
| NR_015456    | D7Erd715e     | 0.319395 | 1 | 0.783209 | 2.60594  | 4.28847  | No change |
| NM_028149    | Fbxl20        | 0.319566 | 1 | 0.475254 | 6.64783  | 8.79975  | No change |
| NM_146007    | Col6a2        | 0.319929 | 1 | 0.555515 | 6.50393  | 9.10623  | No change |
| NM_133242    | Rbm39         | 0.320051 | 1 | 0.406018 | 68.4289  | 86.3177  | No change |
| NM_030705    | Mesdc1        | 0.320231 | 1 | 0.791927 | 1.43118  | 2.37002  | No change |
| NM_009497    | Vamp2         | 0.32027  | 1 | 0.599282 | 7.85817  | 11.3459  | No change |
| NM_198831    | Mrp148        | 0.32027  | 1 | 0.599282 | 17.9568  | 25.9266  | No change |
| NR_037270    | Mir3087       | 0.320434 | 1 | 1.14488  | 27.3794  | 58.9712  | No change |
| NM_016690    | Hnrpd1        | 0.32047  | 1 | 0.461268 | 25.571   | 33.5199  | No change |
| NM_033270    | E2f6          | 0.3208   | 1 | 0.724352 | 3.1835   | 5.02241  | No change |
| NM_133354    | Sumo2         | 0.320957 | 1 | 0.447717 | 87.3606  | 113.441  | No change |
| NM_178377    | Commd10       | 0.321198 | 1 | 0.632883 | 8.6835   | 12.838   | No change |
| NM_153080    | Tom1l2        | 0.321259 | 1 | 0.500464 | 8.55829  | 11.5296  | No change |
| NM_001177480 | Gm14391       | 0.321316 | 1 | 1.00694  | 2.50482  | 4.85689  | No change |
| NM_026928    | 1810014F10Rik | 0.321316 | 1 | 1.00694  | 3.64548  | 7.06865  | No change |
| NM_001114079 | Pabpc1l       | 0.321565 | 1 | 0.765932 | 2.66456  | 4.33064  | No change |
| NM_009776    | Serping1      | 0.321599 | 1 | 0.448996 | 47.4065  | 61.614   | No change |
| NM_194344    | Sh3tc1        | 0.321606 | 1 | 0.670248 | 2.32872  | 3.5351   | No change |
| NM_001122896 | Hp1bp3        | 0.321624 | 1 | 0.470701 | 20.0818  | 26.4979  | No change |
| NM_013494    | Cpe           | 0.322019 | 1 | 0.44534  | 44.0534  | 57.1104  | No change |
| NM_138604    | Otud5         | 0.322228 | 1 | 0.543319 | 11.1072  | 15.4188  | No change |
| NM_007668    | Cdk5          | 0.322244 | 1 | 0.531311 | 15.1035  | 20.7908  | No change |
| NM_009005    | Rab7          | 0.322389 | 1 | 0.560188 | 38.0854  | 53.4981  | No change |
| NR_027958    | D930048N14Rik | 0.322503 | 1 | 0.612957 | 4.5527   | 6.63684  | No change |
| NM_182939    | Ppp4r2        | 0.322525 | 1 | 0.447084 | 24.8069  | 32.1985  | No change |
| NM_025959    | Psmc6         | 0.322564 | 1 | 0.582493 | 12.6107  | 17.9936  | No change |
| NM_139300    | Myk           | 0.322798 | 1 | 0.434361 | 14.4848  | 18.6349  | No change |
| NM_018867    | Cpxm2         | 0.322816 | 1 | 0.567573 | 6.3809   | 9.00971  | No change |
| NM_001033272 | Spata13       | 0.322876 | 1 | 0.547508 | 3.56021  | 4.9567   | No change |
| NM_198031    | Tubgcp3       | 0.322926 | 1 | 0.531295 | 8.57554  | 11.8045  | No change |
| NM_029083    | Ddit4         | 0.322951 | 1 | 0.554638 | 14.8899  | 20.8343  | No change |
| NM_001160229 | Zfp275        | 0.323062 | 1 | 0.494677 | 7.44294  | 9.98652  | No change |
| NM_001013379 | Zfp930        | 0.32311  | 1 | 0.676046 | 3.44278  | 5.24774  | No change |
| NM_008380    | Inhba         | 0.323522 | 1 | 0.930143 | 2.05113  | 3.75623  | No change |
| NM_001130451 | Nfe2l1        | 0.323701 | 1 | 0.435963 | 31.6284  | 40.7358  | No change |
| NR_027913    | G630025P09Rik | 0.323737 | 1 | 0.734007 | 3.14647  | 4.99811  | No change |
| NM_028658    | Klraq1        | 0.323766 | 1 | 0.72883  | 2.44537  | 3.87007  | No change |
| NM_010097    | Sparcl1       | 0.32384  | 1 | 0.466157 | 22.053   | 29.0067  | No change |
| NM_001081352 | Ttc37         | 0.324089 | 1 | 0.660422 | 2.12407  | 3.20198  | No change |
| NM_198326    | Nsfl1c        | 0.324125 | 1 | 0.563888 | 17.2431  | 24.2838  | No change |
| NM_021395    | Hyou1         | 0.324592 | 1 | 0.399903 | 56.7041  | 71.224   | No change |
| NM_001081049 | Mil1          | 0.32461  | 1 | 0.471559 | 3.91305  | 5.16629  | No change |
| NM_026036    | Cmtm6         | 0.32465  | 1 | 0.458198 | 23.3488  | 30.5411  | No change |
| NM_011203    | Ptpn12        | 0.324686 | 1 | 0.53458  | 9.72972  | 13.424   | No change |
| NM_001172098 | Strn3         | 0.324911 | 1 | 0.446306 | 24.3177  | 31.5462  | No change |
| NM_019722    | Arl2          | 0.325031 | 1 | 0.621062 | 17.2428  | 25.2797  | No change |
| NM_009473    | Nr1h2         | 0.325033 | 1 | 0.507921 | 20.8759  | 28.2702  | No change |
| NM_178684    | Mapk1ip1l     | 0.325065 | 1 | 0.490526 | 11.2148  | 15.0037  | No change |
| NM_178668    | Pde12         | 0.325353 | 1 | 0.612661 | 4.52244  | 6.59118  | No change |
| NR_033514    | 2310015A10Rik | 0.325772 | 1 | 0.634245 | 2.83375  | 4.19336  | No change |
| NM_145606    | Chmp1a        | 0.325816 | 1 | 0.457244 | 37.2381  | 48.6763  | No change |
| NM_009671    | Ankyf1        | 0.325853 | 1 | 0.476062 | 7.65113  | 10.1333  | No change |

|              |               |          |   |          |         |         |           |
|--------------|---------------|----------|---|----------|---------|---------|-----------|
| NM_177103    | Senp5         | 0.326198 | 1 | 0.497112 | 7.43802 | 9.99679 | No change |
| NM_024456    | Rab5c         | 0.326331 | 1 | 0.486076 | 34.4256 | 45.9134 | No change |
| NM_198024    | Ranbp3l       | 0.326344 | 1 | 0.92121  | 0.86747 | 1.57803 | No change |
| NM_001172113 | Traf7         | 0.326427 | 1 | 0.4913   | 18.6875 | 25.0145 | No change |
| NM_023598    | Arid5b        | 0.326643 | 1 | 0.521213 | 8.01763 | 10.9587 | No change |
| NM_026734    | Tmem126b      | 0.326781 | 1 | 0.733375 | 8.81268 | 13.9917 | No change |
| NM_007803    | Cttn          | 0.32679  | 1 | 0.467929 | 23.0546 | 30.3613 | No change |
| NM_130451    | Slc2a10       | 0.32687  | 1 | 0.787627 | 1.72827 | 2.85276 | No change |
| NM_001111016 | Nav2          | 0.326917 | 1 | 0.455328 | 7.66521 | 10.0063 | No change |
| NM_177275    | Amigo3        | 0.326947 | 1 | 0.718883 | 3.23388 | 5.08155 | No change |
| NM_001163102 | Eme2          | 0.327127 | 1 | 0.585573 | 13.1047 | 18.7383 | No change |
| NM_025356    | Ube2d3        | 0.327198 | 1 | 0.436465 | 44.9984 | 57.9755 | No change |
| NM_178392    | Snopc1        | 0.327222 | 1 | 0.750264 | 3.27967 | 5.2703  | No change |
| NM_001048206 | Traf3         | 0.327356 | 1 | 0.581187 | 2.99983 | 4.27624 | No change |
| NM_029541    | Arxes1        | 0.327378 | 1 | 0.818848 | 3.17588 | 5.3616  | No change |
| NM_001105557 | Zfp938        | 0.327548 | 1 | 0.706312 | 4.3601  | 6.79008 | No change |
| NM_023622    | Rgl3          | 0.327548 | 1 | 0.706312 | 3.47098 | 5.40544 | No change |
| NM_001114347 | Clasp2        | 0.327726 | 1 | 0.528152 | 5.3189  | 7.30536 | No change |
| NM_025780    | Thap2         | 0.327821 | 1 | 0.702484 | 2.65847 | 4.12882 | No change |
| NM_001127348 | Snx10         | 0.327914 | 1 | 0.665993 | 4.58208 | 6.93436 | No change |
| NM_177381    | Cog3          | 0.327978 | 1 | 0.462336 | 18.2899 | 23.9927 | No change |
| NM_001164729 | Tomm6         | 0.328103 | 1 | 0.519441 | 37.0265 | 50.546  | No change |
| NM_025302    | Mrpl2         | 0.328128 | 1 | 0.698817 | 9.15925 | 14.1879 | No change |
| NM_001083317 | Slc35a4       | 0.328329 | 1 | 0.58253  | 7.54264 | 10.7621 | No change |
| NM_025794    | Etfhd         | 0.328468 | 1 | 0.526718 | 15.1852 | 20.8354 | No change |
| NM_198006    | 6330578E17Rik | 0.328474 | 1 | 0.461596 | 20.3737 | 26.7125 | No change |
| NM_009177    | St3gal1       | 0.328547 | 1 | 0.605064 | 2.98822 | 4.33179 | No change |
| NM_026512    | Bphl          | 0.32868  | 1 | 0.633394 | 11.6443 | 17.2203 | No change |
| NM_001031808 | Mrpl41        | 0.328967 | 1 | 0.511145 | 17.0277 | 23.1106 | No change |
| NM_023526    | Nkiras1       | 0.329043 | 1 | 0.560514 | 5.4673  | 7.68127 | No change |
| NM_026381    | Shisa5        | 0.329096 | 1 | 0.593252 | 12.2829 | 17.6581 | No change |
| NM_033146    | Fam158a       | 0.329124 | 1 | 0.805733 | 6.66628 | 11.1477 | No change |
| NM_172738    | Zfp954        | 0.329124 | 1 | 0.805733 | 2.63444 | 4.40544 | No change |
| NM_133859    | Olfml3        | 0.329159 | 1 | 0.549483 | 16.0181 | 22.3313 | No change |
| NM_016974    | Dbp           | 0.329216 | 1 | 0.777673 | 3.65493 | 5.98971 | No change |
| NM_172664    | Tlk1          | 0.329287 | 1 | 0.471693 | 16.9953 | 22.4402 | No change |
| NM_026815    | Upk1a         | 0.329747 | 1 | 0.732765 | 6.01081 | 9.53866 | No change |
| NM_001122851 | Faim          | 0.329843 | 1 | 0.737988 | 7.00823 | 11.163  | No change |
| NM_001163794 | Pdik1l        | 0.329943 | 1 | 0.570527 | 5.13494 | 7.26513 | No change |
| NM_145563    | Zfp932        | 0.329987 | 1 | 0.617093 | 7.69141 | 11.2444 | No change |
| NM_009285    | Stc1          | 0.330193 | 1 | 0.635552 | 3.74253 | 5.54304 | No change |
| NM_173364    | Zfp445        | 0.330232 | 1 | 0.432638 | 21.7108 | 27.8974 | No change |
| NM_001099675 | Tomm5         | 0.330326 | 1 | 0.706197 | 14.1358 | 22.0114 | No change |
| NM_001161767 | Galnt6        | 0.33038  | 1 | 0.666396 | 2.0059  | 3.03644 | No change |
| NM_016979    | Prkx          | 0.330584 | 1 | 0.587191 | 6.30804 | 9.02989 | No change |
| NM_030707    | Fcrls         | 0.330748 | 1 | 0.860098 | 2.13524 | 3.71395 | No change |
| NR_033135    | A330049M08Rik | 0.331061 | 1 | 0.761869 | 3.33692 | 5.4067  | No change |
| NM_201600    | Myo5b         | 0.331063 | 1 | 0.427093 | 23.0353 | 29.4854 | No change |
| NM_001164263 | 9930023K05Rik | 0.331071 | 1 | 0.794098 | 2.39615 | 3.97334 | No change |
| NM_001127189 | Gm13157       | 0.331254 | 1 | 0.596248 | 6.92077 | 9.97024 | No change |
| NM_025824    | Bzw1          | 0.331274 | 1 | 0.4448   | 38.4258 | 49.795  | No change |
| NM_001077193 | Abi1          | 0.331495 | 1 | 0.492222 | 16.5534 | 22.1717 | No change |
| NM_178194    | Hist1h2be     | 0.331506 | 1 | 0.502897 | 18.6608 | 25.1813 | No change |
| NM_133683    | Tmem19        | 0.331574 | 1 | 0.59336  | 6.4389  | 9.25719 | No change |
| NM_177692    | Bloc1s3       | 0.331624 | 1 | 0.768719 | 3.53405 | 5.75424 | No change |
| NM_021522    | Usp14         | 0.331693 | 1 | 0.467782 | 17.952  | 23.6387 | No change |
| NM_153550    | Dirc2         | 0.332016 | 1 | 0.626441 | 3.3209  | 4.88696 | No change |
| NM_033478    | Ly6g6d        | 0.332089 | 1 | 1.06495  | 3.34065 | 6.76378 | No change |
| NM_001164406 | Sra1          | 0.332227 | 1 | 0.524139 | 42.7332 | 58.5271 | No change |
| NM_018829    | Ap3m1         | 0.332317 | 1 | 0.491515 | 12.3034 | 16.471  | No change |
| NM_133983    | Cd276         | 0.332317 | 1 | 1.04459  | 0.67833 | 1.35242 | No change |
| NM_174851    | Il28ra        | 0.332334 | 1 | 0.826573 | 1.23366 | 2.09413 | No change |
| NM_001038663 | Mapk1         | 0.33247  | 1 | 0.528892 | 18.2529 | 25.0822 | No change |
| NM_011654    | Tuba1b        | 0.332721 | 1 | 0.409714 | 153.44  | 194.047 | No change |
| NM_019642    | Rpn2          | 0.332769 | 1 | 0.419942 | 68.5896 | 87.3598 | No change |
| NM_008753    | Oaz1          | 0.33287  | 1 | 0.495323 | 48.5581 | 65.1795 | No change |
| NM_029711    | Arpc2         | 0.33289  | 1 | 0.496727 | 32.119  | 43.1555 | No change |
| NM_001141946 | Mkks          | 0.333073 | 1 | 0.647287 | 4.453   | 6.65001 | No change |
| NM_001128171 | Cyld          | 0.333574 | 1 | 0.496219 | 6.39016 | 8.58284 | No change |
| NM_011787    | Amfr          | 0.333823 | 1 | 0.419681 | 52.2223 | 66.5013 | No change |
| NM_027924    | Pdgfd         | 0.334061 | 1 | 0.692123 | 5.55214 | 8.55892 | No change |
| NM_027892    | Ppp1r12a      | 0.334112 | 1 | 0.521752 | 11.3868 | 15.5691 | No change |
| NM_009162    | Scg5          | 0.334126 | 1 | 1.01002  | 1.98798 | 3.86162 | No change |
| NM_145627    | Rbm10         | 0.334543 | 1 | 0.600813 | 5.44381 | 7.8675  | No change |
| NM_020619    | Mogs          | 0.334598 | 1 | 0.539757 | 11.6239 | 16.0947 | No change |
| NM_026218    | Fgfr1op2      | 0.334999 | 1 | 0.459085 | 32.0617 | 41.9627 | No change |

|              |               |          |   |          |          |          |           |
|--------------|---------------|----------|---|----------|----------|----------|-----------|
| NM_130796    | Snx18         | 0.33503  | 1 | 0.594905 | 4.41948  | 6.36061  | No change |
| NR_033324    | BC065397      | 0.335365 | 1 | 0.800697 | 1.74988  | 2.91526  | No change |
| NM_029787    | Cyb5r3        | 0.335562 | 1 | 0.482885 | 31.4133  | 41.8014  | No change |
| NM_001205346 | Sun2          | 0.335709 | 1 | 0.476585 | 18.3808  | 24.3519  | No change |
| NM_001048061 | Hnrnpab       | 0.335727 | 1 | 0.441181 | 49.6477  | 64.1746  | No change |
| NM_138753    | Hexim1        | 0.335733 | 1 | 0.53631  | 9.92099  | 13.7036  | No change |
| NM_183370    | Sytl3         | 0.336016 | 1 | 1.1436   | 0.930858 | 2.00114  | No change |
| NM_025460    | Tmem126a      | 0.336065 | 1 | 0.627778 | 20.1072  | 29.6161  | No change |
| NM_001171147 | Yap1          | 0.336475 | 1 | 0.474286 | 17.5361  | 23.1956  | No change |
| NM_007573    | C1qbp         | 0.336502 | 1 | 0.59854  | 16.5708  | 23.9098  | No change |
| NM_029362    | Chmp4b        | 0.336511 | 1 | 0.526238 | 23.5637  | 32.3193  | No change |
| NM_013789    | Sergef        | 0.336933 | 1 | 0.92541  | 2.29127  | 4.17961  | No change |
| NM_001077364 | Tsc22d3       | 0.33694  | 1 | 0.551894 | 13.5947  | 18.9838  | No change |
| NM_016742    | Cdc37         | 0.33707  | 1 | 0.503007 | 20.3176  | 27.4185  | No change |
| NM_145479    | Klhl22        | 0.337134 | 1 | 0.63593  | 5.59034  | 8.28146  | No change |
| NM_008156    | Gpld1         | 0.337671 | 1 | 0.517558 | 9.06502  | 12.3581  | No change |
| NM_015786    | Hist1h1c      | 0.337818 | 1 | 0.48783  | 39.3334  | 52.521   | No change |
| NM_028173    | Tram1         | 0.337977 | 1 | 0.403835 | 113.685  | 143.184  | No change |
| NM_001163660 | Nkd1          | 0.338068 | 1 | 0.654423 | 3.1586   | 4.74058  | No change |
| NM_026423    | Mri1          | 0.338599 | 1 | 0.675166 | 5.28616  | 8.05101  | No change |
| NM_009344    | Phlda1        | 0.338637 | 1 | 0.741128 | 3.96104  | 6.3226   | No change |
| NM_144787    | Kdm4c         | 0.338799 | 1 | 0.582595 | 5.27158  | 7.52144  | No change |
| NM_007471    | App           | 0.338822 | 1 | 0.442364 | 41.8336  | 54.1183  | No change |
| NM_024450    | Scd3          | 0.338842 | 1 | 0.660921 | 3.59511  | 5.42053  | No change |
| NM_138677    | Edem1         | 0.338844 | 1 | 0.511799 | 7.81636  | 10.613   | No change |
| NM_001081212 | Irs2          | 0.338852 | 1 | 0.695497 | 2.50144  | 3.86512  | No change |
| NM_027044    | Pfdn5         | 0.338947 | 1 | 0.494535 | 83.981   | 112.663  | No change |
| NM_008177    | Grpr          | 0.338983 | 1 | 1.79193  | 0.251599 | 0.892708 | No change |
| NM_010236    | Fpgs          | 0.339084 | 1 | 0.536821 | 15.3368  | 21.1915  | No change |
| NM_177390    | Myo1d         | 0.339119 | 1 | 0.561807 | 5.06455  | 7.12143  | No change |
| NM_172161    | Irak2         | 0.339353 | 1 | 0.752257 | 2.28966  | 3.68389  | No change |
| NM_029423    | Rab11fip1     | 0.339407 | 1 | 0.489466 | 9.57979  | 12.8062  | No change |
| NM_031254    | Trem2         | 0.339558 | 1 | 1.17799  | 1.34518  | 2.9693   | No change |
| NR_038032    | 9330159K06    | 0.339558 | 1 | 1.17799  | 0.456789 | 1.0083   | No change |
| NR_033574    | Nutf2-ps1     | 0.33958  | 1 | 0.609511 | 20.7088  | 30.1112  | No change |
| NM_026632    | Rpa3          | 0.339668 | 1 | 0.864495 | 6.77267  | 11.8151  | No change |
| NM_025673    | Golph3        | 0.340072 | 1 | 0.460364 | 36.9843  | 48.4479  | No change |
| NR_015499    | C030034L19Rik | 0.340125 | 1 | 0.787868 | 1.95629  | 3.22888  | No change |
| NM_001135559 | Sos2          | 0.3403   | 1 | 0.522756 | 7.30211  | 9.99087  | No change |
| NM_019725    | Tle2          | 0.340303 | 1 | 0.88523  | 1.44507  | 2.5593   | No change |
| NM_028940    | Clvs1         | 0.340373 | 1 | 0.830921 | 1.39231  | 2.37046  | No change |
| NM_145405    | Ubl4          | 0.340714 | 1 | 0.721537 | 14.2114  | 22.3688  | No change |
| NR_029440    | 2010320M18Rik | 0.34079  | 1 | 0.725929 | 11.4128  | 18.02    | No change |
| NM_011967    | Psm5          | 0.341049 | 1 | 0.661343 | 10.3652  | 15.6324  | No change |
| NM_001167981 | Galnt7        | 0.341267 | 1 | 0.553896 | 6.87294  | 9.61073  | No change |
| NM_194462    | Akap9         | 0.341754 | 1 | 0.432274 | 14.2149  | 18.2606  | No change |
| NM_001163215 | Fgfr3         | 0.341762 | 1 | 0.689357 | 2.49548  | 3.839    | No change |
| NM_001193660 | Cldn12        | 0.341936 | 1 | 0.554782 | 7.93147  | 11.0978  | No change |
| NM_009557    | Zfp46         | 0.342538 | 1 | 0.615356 | 3.81756  | 5.57359  | No change |
| NM_011610    | Tnfrsf1b      | 0.342539 | 1 | 0.605243 | 3.90099  | 5.65502  | No change |
| NM_177910    | Gmpgb         | 0.342678 | 1 | 0.569775 | 14.5307  | 20.5461  | No change |
| NM_029929    | Vps33a        | 0.342748 | 1 | 0.535759 | 8.86631  | 12.2417  | No change |
| NR_015606    | 9530009M10Rik | 0.343251 | 1 | 0.717056 | 3.07957  | 4.83162  | No change |
| NM_010347    | Aes           | 0.343311 | 1 | 0.520238 | 32.3888  | 44.2365  | No change |
| NM_177262    | Pkn1          | 0.343815 | 1 | 0.569139 | 7.68732  | 10.8648  | No change |
| NM_145539    | Tm4sf4        | 0.344241 | 1 | 0.814295 | 3.9383   | 6.62449  | No change |
| NM_144839    | Ube2e2        | 0.344293 | 1 | 0.616025 | 12.985   | 18.9666  | No change |
| NM_146025    | Samd14        | 0.344444 | 1 | 0.902351 | 1.13424  | 2.03386  | No change |
| NM_015791    | Fbxo8         | 0.344597 | 1 | 0.623671 | 4.78188  | 7.02237  | No change |
| NM_033560    | Vps37a        | 0.344683 | 1 | 0.488985 | 10.401   | 13.899   | No change |
| NM_025349    | Lsm7          | 0.344831 | 1 | 0.750348 | 16.2319  | 26.0779  | No change |
| NM_145483    | Zfp160        | 0.344841 | 1 | 0.615049 | 4.75638  | 6.94263  | No change |
| NM_001159697 | Ccdc48        | 0.344984 | 1 | 0.938283 | 1.18982  | 2.1905   | No change |
| NM_145491    | Rhoq          | 0.34513  | 1 | 0.503129 | 13.357   | 18.0261  | No change |
| NM_177813    | Gm5087        | 0.34535  | 1 | 1.04674  | 1.16094  | 2.31704  | No change |
| NM_025785    | Fbxo25        | 0.345436 | 1 | 0.676007 | 5.86559  | 8.93812  | No change |
| NM_010388    | H2-DMb2       | 0.345728 | 1 | 0.712892 | 11.9702  | 18.7241  | No change |
| NM_172767    | Vwa5a         | 0.34585  | 1 | 0.606624 | 4.67749  | 6.78707  | No change |
| NM_153163    | Cadps2        | 0.346042 | 1 | 0.588494 | 4.73556  | 6.78434  | No change |
| NM_013454    | Abca1         | 0.346168 | 1 | 0.409011 | 35.091   | 44.3551  | No change |
| NM_175438    | Aldh4a1       | 0.346449 | 1 | 0.584047 | 7.042    | 10.0572  | No change |
| NM_080555    | Ppap2b        | 0.346491 | 1 | 0.539926 | 11.4612  | 15.8703  | No change |
| NM_178704    | Dpy19l3       | 0.346666 | 1 | 0.628428 | 2.1532   | 3.17262  | No change |
| NM_020270    | Scamp5        | 0.346734 | 1 | 0.666756 | 3.95312  | 5.98446  | No change |
| NM_007875    | Dpagt1        | 0.347032 | 1 | 0.744098 | 4.1706   | 6.67034  | No change |
| NM_026038    | 2810055F11Rik | 0.347359 | 1 | 0.998378 | 1.55327  | 2.98954  | No change |

|              |               |          |   |          |          |         |           |
|--------------|---------------|----------|---|----------|----------|---------|-----------|
| NM_001032378 | Pecam1        | 0.34744  | 1 | 0.662554 | 4.01249  | 6.05626 | No change |
| NM_026532    | Nutf2         | 0.347503 | 1 | 0.589193 | 11.5978  | 16.6234 | No change |
| NM_134077    | Rbm26         | 0.34766  | 1 | 0.443056 | 37.6053  | 48.671  | No change |
| NM_134015    | Fbxw11        | 0.347835 | 1 | 0.528892 | 10.3403  | 14.2081 | No change |
| NM_010926    | Cox4nb        | 0.347939 | 1 | 0.558236 | 6.17389  | 8.65916 | No change |
| NM_001160356 | Al462493      | 0.347981 | 1 | 0.630253 | 19.7925  | 29.2002 | No change |
| NR_028066    | Gm4926        | 0.348518 | 1 | 0.669291 | 7.74366  | 11.7436 | No change |
| NM_172695    | Plaa          | 0.348526 | 1 | 0.485824 | 10.7684  | 14.3582 | No change |
| NM_016788    | Tnk2          | 0.348552 | 1 | 0.65671  | 3.06686  | 4.60984 | No change |
| NM_016928    | Tlr5          | 0.348606 | 1 | 0.985121 | 0.871434 | 1.66069 | No change |
| NM_010885    | Ndufa2        | 0.348762 | 1 | 0.496652 | 119.097  | 160.003 | No change |
| NM_001170866 | Ncald         | 0.348838 | 1 | 0.667108 | 3.60481  | 5.45839 | No change |
| NM_009697    | Nr2f2         | 0.348842 | 1 | 0.633373 | 3.8351   | 5.6704  | No change |
| NM_001080808 | Ccdc64        | 0.349091 | 1 | 0.684171 | 6.16818  | 9.45332 | No change |
| NM_138603    | Ccdc22        | 0.349219 | 1 | 0.738346 | 3.67618  | 5.85529 | No change |
| NM_146136    | Slc16a4       | 0.349219 | 1 | 0.738346 | 3.7939   | 6.04279 | No change |
| NM_001085546 | LOC664987     | 0.349471 | 1 | 1.57329  | 1.2266   | 3.6757  | No change |
| NM_144910    | Cnot6l        | 0.349489 | 1 | 0.541067 | 17.5892  | 24.3747 | No change |
| NR_027937    | Sgsm1         | 0.350043 | 1 | 0.972992 | 1.26386  | 2.38683 | No change |
| NM_177662    | Ctso          | 0.350077 | 1 | 0.603439 | 5.97426  | 8.64901 | No change |
| NM_177224    | Chd9          | 0.350085 | 1 | 0.49569  | 5.64587  | 7.57991 | No change |
| NM_001145799 | Ctla2a        | 0.350641 | 1 | 0.846751 | 3.65431  | 6.29179 | No change |
| NM_152799    | Pear1         | 0.350703 | 1 | 0.639924 | 3.49557  | 5.19223 | No change |
| NM_178699    | B930041F14Rik | 0.350902 | 1 | 0.724288 | 4.22973  | 6.66966 | No change |
| NM_133708    | Gmppa         | 0.350906 | 1 | 0.655316 | 9.16772  | 13.7662 | No change |
| NM_001145857 | Lrp4          | 0.35094  | 1 | 0.689829 | 3.43526  | 5.2859  | No change |
| NM_031999    | Gpr137b       | 0.351232 | 1 | 0.759847 | 2.5024   | 4.04728 | No change |
| NM_007624    | Cbx3          | 0.351474 | 1 | 0.500025 | 34.5952  | 46.5865 | No change |
| NM_010162    | Ext1          | 0.351505 | 1 | 0.581573 | 7.28736  | 10.3892 | No change |
| NM_053147    | Pcdhb22       | 0.351522 | 1 | 0.818399 | 1.81788  | 3.06639 | No change |
| NM_145582    | Ctu1          | 0.351522 | 1 | 0.818399 | 2.26736  | 3.82457 | No change |
| NM_001168667 | Fam114a2      | 0.351708 | 1 | 0.513062 | 20.3395  | 27.6397 | No change |
| NM_001159637 | Nadk          | 0.351787 | 1 | 0.49812  | 21.181   | 28.4847 | No change |
| NM_024209    | Ppp6c         | 0.351848 | 1 | 0.50576  | 37.2173  | 50.3182 | No change |
| NM_028194    | Fryl          | 0.351873 | 1 | 0.455583 | 11.338   | 14.8026 | No change |
| NM_001009575 | Armcx5        | 0.351907 | 1 | 0.676791 | 4.31879  | 6.58423 | No change |
| NM_001024458 | Add1          | 0.35195  | 1 | 0.493716 | 17.5255  | 23.4966 | No change |
| NM_007610    | Casp2         | 0.351981 | 1 | 0.630201 | 4.89038  | 7.21434 | No change |
| NM_007462    | Apc           | 0.352007 | 1 | 0.475809 | 7.27776  | 9.63633 | No change |
| NM_016686    | Vezf1         | 0.352029 | 1 | 0.538504 | 8.63261  | 11.9413 | No change |
| NM_013635    | Sypl          | 0.352337 | 1 | 0.483169 | 17.6397  | 23.4764 | No change |
| NM_001077638 | Prmt2         | 0.352536 | 1 | 0.62393  | 8.69464  | 12.7698 | No change |
| NM_198001    | 1110008P14Rik | 0.352555 | 1 | 0.572627 | 42.1128  | 59.6619 | No change |
| NM_144521    | Snap47        | 0.352723 | 1 | 0.536348 | 21.9284  | 30.2874 | No change |
| NM_001045559 | Zfp952        | 0.352816 | 1 | 0.701999 | 3.47538  | 5.39387 | No change |
| NM_001033225 | Pnrc1         | 0.353202 | 1 | 0.541276 | 19.9123  | 27.5976 | No change |
| NM_008898    | Por           | 0.353419 | 1 | 0.684519 | 4.76533  | 7.30474 | No change |
| NM_008248    | Hint1         | 0.353545 | 1 | 0.515797 | 90.262   | 122.892 | No change |
| NM_001171002 | Degs2         | 0.353591 | 1 | 0.795885 | 1.96935  | 3.26835 | No change |
| NM_008739    | Nsd1          | 0.353616 | 1 | 0.434658 | 16.7854  | 21.5979 | No change |
| NM_028261    | Tmem173       | 0.353813 | 1 | 0.7325   | 3.81464  | 6.05015 | No change |
| NM_009316    | Map3k7        | 0.353841 | 1 | 0.508248 | 9.99069  | 13.5309 | No change |
| NM_019773    | Rab9          | 0.354169 | 1 | 0.635053 | 11.4551  | 16.9562 | No change |
| NM_001038492 | Ctsa          | 0.354267 | 1 | 0.559022 | 9.05792  | 12.7107 | No change |
| NM_010186    | Fcgr1         | 0.354613 | 1 | 1.17526  | 0.592215 | 1.30327 | No change |
| NM_025669    | Sfrs18        | 0.354648 | 1 | 0.466472 | 24.519   | 32.2546 | No change |
| NM_001110145 | Ssb           | 0.354769 | 1 | 0.52266  | 23.5015  | 32.1509 | No change |
| NM_025546    | Rsl1d1        | 0.354813 | 1 | 0.510208 | 30.8862  | 41.8878 | No change |
| NM_016851    | Irf6          | 0.35486  | 1 | 0.540297 | 9.56503  | 13.2476 | No change |
| NM_134099    | Fbxo4         | 0.355111 | 1 | 0.69579  | 3.19544  | 4.93745 | No change |
| NM_008125    | Gjb2          | 0.355125 | 1 | 0.942088 | 1.39154  | 2.56823 | No change |
| NM_001159410 | Guk1          | 0.355438 | 1 | 0.513286 | 58.8104  | 79.9298 | No change |
| NM_175121    | Slc38a2       | 0.356142 | 1 | 0.516156 | 11.5502  | 15.7295 | No change |
| NM_013565    | Itga3         | 0.356562 | 1 | 0.568693 | 6.14642  | 8.68356 | No change |
| NM_001128096 | Atp13a3       | 0.356615 | 1 | 0.492058 | 10.298   | 13.7905 | No change |
| NM_001205286 | Tmem39a       | 0.35666  | 1 | 0.608156 | 7.98926  | 11.604  | No change |
| NM_021534    | Pxmp4         | 0.356725 | 1 | 0.812988 | 3.98788  | 6.69984 | No change |
| NM_013898    | Timm8a1       | 0.357002 | 1 | 0.763523 | 6.3625   | 10.3165 | No change |
| NM_153088    | Ctdsp1        | 0.357105 | 1 | 0.607394 | 7.60697  | 11.0428 | No change |
| NM_001177995 | Prdm16        | 0.357322 | 1 | 0.708467 | 1.22312  | 1.90693 | No change |
| NM_145406    | Slc10a3       | 0.357481 | 1 | 0.643404 | 8.27784  | 12.3251 | No change |
| NM_177184    | Vps13c        | 0.357865 | 1 | 0.579646 | 2.35878  | 3.3581  | No change |
| NM_001080948 | Larp4         | 0.357968 | 1 | 0.470427 | 16.8419  | 22.2163 | No change |
| NM_001166399 | Rab3a         | 0.358036 | 1 | 0.751285 | 5.57159  | 8.95532 | No change |
| NM_015737    | Galnt4        | 0.358128 | 1 | 0.608773 | 4.11642  | 5.98141 | No change |
| NM_001109971 | Sec61g        | 0.358198 | 1 | 0.727246 | 11.8988  | 18.8002 | No change |



|              |               |          |   |          |         |         |           |
|--------------|---------------|----------|---|----------|---------|---------|-----------|
| NM_009748    | Bet1          | 0.358331 | 1 | 0.537792 | 28.7614 | 39.7642 | No change |
| NM_019712    | Rbx1          | 0.358339 | 1 | 0.565139 | 18.9919 | 26.7644 | No change |
| NM_001164678 | Pdcd6ip       | 0.358534 | 1 | 0.491672 | 13.0733 | 17.5021 | No change |
| NM_026528    | 2700060E02Rik | 0.358882 | 1 | 0.503761 | 43.385  | 58.5738 | No change |
| NM_007743    | Col1a2        | 0.358939 | 1 | 0.614028 | 3.94335 | 5.75109 | No change |
| NM_026048    | Cinp          | 0.359053 | 1 | 0.666729 | 6.73229 | 10.1901 | No change |
| NM_178925    | Nsun3         | 0.359242 | 1 | 0.810463 | 4.45952 | 7.47823 | No change |
| NM_007393    | Actb          | 0.359684 | 1 | 0.397901 | 517.587 | 649.197 | No change |
| NM_001079513 | Zbtb33        | 0.359899 | 1 | 0.641102 | 3.33816 | 4.96211 | No change |
| NR_027851    | 2900005J15Rik | 0.359908 | 1 | 0.782882 | 3.3938  | 5.57943 | No change |
| NM_001166552 | Zbed6         | 0.360042 | 1 | 0.49523  | 15.0744 | 20.2311 | No change |
| NM_010163    | Ext2          | 0.360195 | 1 | 0.58272  | 9.39435 | 13.403  | No change |
| NM_011561    | Tdg           | 0.360241 | 1 | 0.639757 | 5.36271 | 7.96399 | No change |
| NM_010496    | Id2           | 0.360255 | 1 | 0.627881 | 14.4098 | 21.2212 | No change |
| NM_001164037 | Ly6e          | 0.360298 | 1 | 0.451062 | 78.9789 | 102.787 | No change |
| NM_001004143 | Usp22         | 0.360537 | 1 | 0.502257 | 15.4228 | 20.8003 | No change |
| NM_028839    | Tmem110       | 0.360611 | 1 | 0.64581  | 4.28822 | 6.3955  | No change |
| NM_026526    | N6amt2        | 0.361065 | 1 | 0.75572  | 9.58695 | 15.4574 | No change |
| NM_172707    | Ppp1cb        | 0.361177 | 1 | 0.486081 | 22.0475 | 29.4015 | No change |
| NM_027196    | Pold4         | 0.361245 | 1 | 0.774649 | 7.93874 | 12.9743 | No change |
| NM_028064    | Slc39a4       | 0.361245 | 1 | 0.774649 | 3.25609 | 5.32143 | No change |
| NM_001159620 | Pigp          | 0.361547 | 1 | 0.70497  | 12.7688 | 19.8571 | No change |
| NM_011792    | Bace1         | 0.361677 | 1 | 0.590787 | 6.0487  | 8.67859 | No change |
| NM_145133    | Tifa          | 0.361703 | 1 | 0.808046 | 2.8699  | 4.80398 | No change |
| NM_022721    | Fzd5          | 0.36177  | 1 | 0.711585 | 1.50192 | 2.34665 | No change |
| NM_178612    | Cnpy4         | 0.361817 | 1 | 0.761281 | 4.38271 | 7.09445 | No change |
| NM_025886    | Rassf7        | 0.361851 | 1 | 0.659542 | 9.59706 | 14.4523 | No change |
| NM_010603    | Kcnj12        | 0.36199  | 1 | 0.965332 | 1.27332 | 2.39012 | No change |
| NM_001163144 | Pcsk5         | 0.362354 | 1 | 0.656084 | 2.60309 | 3.91045 | No change |
| NM_028447    | Prrc1         | 0.362511 | 1 | 0.577369 | 6.0388  | 8.58322 | No change |
| NM_008060    | Ganab         | 0.36267  | 1 | 0.492745 | 21.2361 | 28.4511 | No change |
| NM_145587    | Sbk1          | 0.362739 | 1 | 0.574199 | 7.32355 | 10.3862 | No change |
| NM_001177710 | Arfgap1       | 0.363345 | 1 | 0.56035  | 14.4733 | 20.3278 | No change |
| NM_011765    | Zfp97         | 0.36338  | 1 | 0.628966 | 6.73471 | 9.9255  | No change |
| NM_027085    | Clic3         | 0.363394 | 1 | 0.955157 | 4.09958 | 7.63734 | No change |
| NM_017393    | Clpp          | 0.363464 | 1 | 0.695935 | 9.58494 | 14.8102 | No change |
| NM_013807    | Plk3          | 0.363516 | 1 | 0.816873 | 2.5027  | 4.21586 | No change |
| NM_025327    | Krtcap2       | 0.363545 | 1 | 0.701801 | 21.6102 | 33.5303 | No change |
| NM_009560    | Zfp60         | 0.363568 | 1 | 0.599884 | 5.85785 | 8.45849 | No change |
| NM_025882    | Pole4         | 0.36375  | 1 | 0.588393 | 15.5925 | 22.334  | No change |
| NM_008732    | Slc11a2       | 0.363839 | 1 | 0.541038 | 14.2936 | 19.806  | No change |
| NM_013543    | H2-Ke6        | 0.363867 | 1 | 0.658175 | 15.5435 | 23.3842 | No change |
| NR_028518    | Scarna3a      | 0.3643   | 1 | 1.50088  | 7.08742 | 20.0771 | No change |
| NM_146035    | Mgat2         | 0.364509 | 1 | 0.520795 | 21.3927 | 29.2268 | No change |
| NM_172672    | Ganc          | 0.364608 | 1 | 0.667687 | 2.93047 | 4.43837 | No change |
| NM_009520    | Wnt2b         | 0.364811 | 1 | 0.903637 | 1.13132 | 2.02936 | No change |
| NM_028747    | 0610012H03Rik | 0.3649   | 1 | 0.945732 | 2.13702 | 3.95345 | No change |
| NM_030138    | Acap2         | 0.364938 | 1 | 0.522071 | 8.52244 | 11.6537 | No change |
| NM_013720    | Mga           | 0.364966 | 1 | 0.453414 | 12.852  | 16.7535 | No change |
| NM_009455    | Ube2e1        | 0.365392 | 1 | 0.602309 | 17.0461 | 24.6555 | No change |
| NM_025593    | Poir2l        | 0.365408 | 1 | 0.5926   | 15.4317 | 22.1688 | No change |
| NM_010756    | Mafg          | 0.365439 | 1 | 0.693215 | 7.29345 | 11.2475 | No change |
| NM_001159404 | Llgl1         | 0.365462 | 1 | 0.639924 | 3.9217  | 5.8244  | No change |
| NM_198096    | Arap1         | 0.365465 | 1 | 0.68797  | 3.35847 | 5.16004 | No change |
| NM_011439    | Sox13         | 0.365587 | 1 | 0.627382 | 5.4278  | 7.99033 | No change |
| NM_025304    | Lcmt1         | 0.3658   | 1 | 0.707977 | 7.94164 | 12.3759 | No change |
| NM_008224    | Hcfc1         | 0.365922 | 1 | 0.497817 | 9.79129 | 13.1642 | No change |
| NM_146191    | Lrrk1         | 0.366568 | 1 | 0.666081 | 1.9354  | 2.92789 | No change |
| NM_019827    | Gsk3b         | 0.367198 | 1 | 0.498226 | 9.67538 | 13.012  | No change |
| NM_001163256 | Fblim1        | 0.367222 | 1 | 0.747983 | 2.84648 | 4.56379 | No change |
| NM_009642    | Agtrap        | 0.367266 | 1 | 0.526104 | 13.4231 | 18.4066 | No change |
| NM_023871    | Set           | 0.367327 | 1 | 0.506172 | 26.593  | 35.9624 | No change |
| NM_001205095 | Gm4944        | 0.367576 | 1 | 0.617471 | 4.32725 | 6.32584 | No change |
| NM_020584    | Terf2ip       | 0.367678 | 1 | 0.676449 | 3.75672 | 5.72493 | No change |
| NM_016666    | Aip           | 0.367741 | 1 | 0.65562  | 11.6414 | 17.4814 | No change |
| NM_199022    | Shc4          | 0.367911 | 1 | 0.552822 | 8.19832 | 11.4538 | No change |
| NM_001142948 | Pogk          | 0.368105 | 1 | 0.512404 | 9.35908 | 12.7116 | No change |
| NM_144859    | Pja2          | 0.368182 | 1 | 0.460938 | 35.9258 | 47.0771 | No change |
| NM_175471    | Cyb5rl        | 0.368204 | 1 | 0.811826 | 3.86459 | 6.48579 | No change |
| NR_028432    | 2210013O21Rik | 0.368204 | 1 | 0.811826 | 7.24611 | 12.1609 | No change |
| NM_001190343 | Ccm2          | 0.368208 | 1 | 0.784906 | 4.17912 | 6.87944 | No change |
| NM_007483    | Rhob          | 0.368393 | 1 | 0.60862  | 10.2959 | 14.9578 | No change |
| NM_009444    | Tgoln2        | 0.368413 | 1 | 0.480899 | 49.0282 | 65.1448 | No change |
| NM_139294    | Braf          | 0.368481 | 1 | 0.467186 | 14.7095 | 19.3593 | No change |
| NM_001145896 | Gse1          | 0.36861  | 1 | 0.614999 | 3.31012 | 4.83051 | No change |
| NM_009149    | Glg1          | 0.368652 | 1 | 0.50021  | 20.5657 | 27.6961 | No change |

|              |               |          |   |          |          |         |           |
|--------------|---------------|----------|---|----------|----------|---------|-----------|
| NM_153794    | 4933403F05Rik | 0.368967 | 1 | 0.524864 | 5.81918  | 7.97264 | No change |
| NM_023750    | Zfp84         | 0.369156 | 1 | 0.638381 | 3.16065  | 4.68885 | No change |
| NM_001083916 | 1810019J16Rik | 0.36928  | 1 | 0.77682  | 4.15208  | 6.79536 | No change |
| NM_013843    | Zfp53         | 0.369501 | 1 | 0.763668 | 2.60302  | 4.22026 | No change |
| NM_011715    | Wdr1          | 0.369545 | 1 | 0.461431 | 57.4882  | 75.3581 | No change |
| NM_183094    | Xlr4c         | 0.369651 | 1 | 0.70467  | 9.28859  | 14.4404 | No change |
| NM_001042650 | Dcun1d2       | 0.369783 | 1 | 0.670528 | 5.00597  | 7.59666 | No change |
| NM_134022    | 6330403K07Rik | 0.37017  | 1 | 0.991371 | 1.83173  | 3.50419 | No change |
| NM_010851    | Myd88         | 0.370636 | 1 | 0.579518 | 16.0971  | 22.9128 | No change |
| NM_198090    | Hnrnpa3       | 0.370909 | 1 | 0.519177 | 23.7451  | 32.4032 | No change |
| NM_001033496 | Zfp213        | 0.371171 | 1 | 0.693404 | 4.61318  | 7.11466 | No change |
| NM_023175    | Nit2          | 0.371518 | 1 | 0.728771 | 7.69549  | 12.1699 | No change |
| NM_024288    | Rmnd5a        | 0.371581 | 1 | 0.498196 | 13.9499  | 18.76   | No change |
| NM_018766    | Ntsr1         | 0.371622 | 1 | 0.66888  | 3.73736  | 5.66481 | No change |
| NR_037190    | Gm9855        | 0.371628 | 1 | 0.65178  | 5.72357  | 8.57132 | No change |
| NM_009434    | Phlda2        | 0.371991 | 1 | 1.0904   | 2.83689  | 5.84458 | No change |
| NM_134249    | Timd2         | 0.371991 | 1 | 1.0904   | 0.688892 | 1.41926 | No change |
| NM_176846    | Exph5         | 0.37208  | 1 | 0.594481 | 2.80195  | 4.03034 | No change |
| NM_021559    | Zfp191        | 0.372137 | 1 | 0.545494 | 14.4154  | 20.0363 | No change |
| NM_153796    | Peo1          | 0.372318 | 1 | 0.659998 | 4.49567  | 6.77157 | No change |
| NM_028814    | 2810403A07Rik | 0.372447 | 1 | 0.54215  | 15.7094  | 21.7839 | No change |
| NM_010560    | Il6st         | 0.372549 | 1 | 0.50292  | 14.8539  | 20.0414 | No change |
| NM_001193303 | Lims1         | 0.372636 | 1 | 0.533163 | 11.8102  | 16.2745 | No change |
| NM_001012402 | Hs3st6        | 0.372641 | 1 | 0.843497 | 4.45578  | 7.64986 | No change |
| NM_001037279 | 2700094K13Rik | 0.372669 | 1 | 0.781779 | 11.2958  | 18.5515 | No change |
| NM_025705    | Dcbl1         | 0.3727   | 1 | 0.807193 | 2.14263  | 3.58362 | No change |
| NM_009639    | Crisp3        | 0.372914 | 1 | 0.589193 | 20.5511  | 29.4514 | No change |
| NM_001001152 | Zfp458        | 0.373013 | 1 | 0.619615 | 6.21402  | 9.09737 | No change |
| NM_008184    | Gstm6         | 0.373176 | 1 | 0.478474 | 108.714  | 144.205 | No change |
| NM_001024145 | Pla2g4f       | 0.373212 | 1 | 0.671072 | 4.66106  | 7.07572 | No change |
| NM_018824    | Slc23a2       | 0.373615 | 1 | 0.617955 | 3.47151  | 5.07636 | No change |
| NM_008278    | Hpgd          | 0.373625 | 1 | 0.745768 | 5.27055  | 8.43617 | No change |
| NM_015740    | Bloc1s1       | 0.373891 | 1 | 0.594054 | 49.9255  | 71.791  | No change |
| NM_028984    | 8430406I07Rik | 0.373988 | 1 | 0.732292 | 3.63011  | 5.75495 | No change |
| NM_010902    | Nfe2l2        | 0.374293 | 1 | 0.537199 | 20.747   | 28.6699 | No change |
| NM_175313    | A130022J15Rik | 0.374311 | 1 | 0.750479 | 2.76162  | 4.43514 | No change |
| NM_008163    | Grb2          | 0.374665 | 1 | 0.681628 | 5.23365  | 8.00428 | No change |
| NM_009029    | Rb1           | 0.374724 | 1 | 0.528457 | 12.4769  | 17.1367 | No change |
| NM_177993    | Hbp1          | 0.374748 | 1 | 0.517944 | 21.9264  | 29.8952 | No change |
| NR_029425    | Rbmx          | 0.374841 | 1 | 0.59715  | 11.3222  | 16.3161 | No change |
| NM_172262    | Kdm1b         | 0.375165 | 1 | 0.665802 | 3.58151  | 5.41674 | No change |
| NM_001081035 | Nav3          | 0.375311 | 1 | 0.648328 | 2.24787  | 3.35799 | No change |
| NM_001113470 | Ctdsp2        | 0.37556  | 1 | 0.531581 | 11.6034  | 15.9717 | No change |
| NM_199079    | Ddx17         | 0.375673 | 1 | 0.451683 | 86.023   | 112     | No change |
| NM_198862    | Nlgn2         | 0.375921 | 1 | 0.760546 | 1.68589  | 2.72697 | No change |
| NM_145417    | Rnpep         | 0.376048 | 1 | 0.542698 | 21.232   | 29.4527 | No change |
| NM_178413    | Thns12        | 0.376382 | 1 | 0.681801 | 7.45903  | 11.4089 | No change |
| NM_144520    | Sec14l2       | 0.376391 | 1 | 0.627945 | 8.21539  | 12.0977 | No change |
| NM_026393    | Nmral1        | 0.376737 | 1 | 0.870998 | 4.20199  | 7.35842 | No change |
| NM_080837    | D17Wsu104e    | 0.376874 | 1 | 0.546341 | 51.6781  | 71.8696 | No change |
| NM_027877    | Mus81         | 0.377191 | 1 | 0.567616 | 18.6034  | 26.2597 | No change |
| NM_080638    | Mvp           | 0.377867 | 1 | 0.558244 | 14.757   | 20.6942 | No change |
| NM_027472    | 5730455P16Rik | 0.378121 | 1 | 0.601433 | 5.8692   | 8.48324 | No change |
| NM_025668    | Spcs2         | 0.378252 | 1 | 0.479383 | 48.228   | 64.0126 | No change |
| NM_172689    | Ddx58         | 0.378596 | 1 | 0.571267 | 7.31755  | 10.3554 | No change |
| NM_010415    | Hbegf         | 0.378703 | 1 | 0.88964  | 1.90739  | 3.38551 | No change |
| NM_022027    | Syne1         | 0.379035 | 1 | 0.545148 | 10.1873  | 14.1558 | No change |
| NM_011809    | Ets2          | 0.379279 | 1 | 0.653699 | 4.86047  | 7.28812 | No change |
| NM_001081267 | Rsf1          | 0.379314 | 1 | 0.535151 | 5.03487  | 6.94751 | No change |
| NM_153420    | Acpl2         | 0.379868 | 1 | 0.668444 | 4.98126  | 7.54726 | No change |
| NM_001163722 | 1190007F08Rik | 0.380153 | 1 | 0.541325 | 15.5195  | 21.5074 | No change |
| NM_009994    | Cyp1b1        | 0.380414 | 1 | 0.542421 | 10.0843  | 13.9858 | No change |
| NM_178589    | Tnfrsf21      | 0.380623 | 1 | 0.655514 | 4.74742  | 7.12762 | No change |
| NM_053261    | Impa2         | 0.380853 | 1 | 0.98261  | 2.26276  | 4.29917 | No change |
| NM_027320    | Ifi35         | 0.380914 | 1 | 0.763797 | 6.25187  | 10.1352 | No change |
| NM_023718    | Slco1a6       | 0.380918 | 1 | 1.05245  | 0.869919 | 1.74101 | No change |
| NM_011663    | Zrsr1         | 0.380957 | 1 | 0.59877  | 9.72797  | 14.0341 | No change |
| NM_025577    | 2810428I15Rik | 0.380957 | 1 | 0.738895 | 14.9569  | 23.8211 | No change |
| NM_001167889 | Suv420h1      | 0.380994 | 1 | 0.632779 | 6.29143  | 9.29573 | No change |
| NM_007505    | Atp5a1        | 0.381242 | 1 | 0.463699 | 84.4858  | 110.92  | No change |
| NM_001195579 | Gm15070       | 0.381422 | 1 | 0.563791 | 11.3073  | 15.9179 | No change |
| NM_001162939 | Aen           | 0.381469 | 1 | 0.647287 | 7.48931  | 11.1791 | No change |
| NM_001037502 | Defb28        | 0.381507 | 1 | 0.637417 | 50.3826  | 74.6843 | No change |
| NR_015497    | 9330133O14Rik | 0.38179  | 1 | 1.25136  | 0.669109 | 1.55988 | No change |
| NM_052993    | C1galt1       | 0.381867 | 1 | 0.611188 | 12.1836  | 17.7305 | No change |
| NM_025624    | Pomp          | 0.382074 | 1 | 0.627967 | 29.6242  | 43.6223 | No change |

|              |               |          |   |          |          |         |           |
|--------------|---------------|----------|---|----------|----------|---------|-----------|
| NM_011125    | Pltp          | 0.382156 | 1 | 0.574545 | 20.0666  | 28.462  | No change |
| NM_026147    | Rps20         | 0.382342 | 1 | 0.473239 | 335.553  | 443.474 | No change |
| NM_024180    | Ormdl2        | 0.382626 | 1 | 0.54674  | 24.4858  | 34.0614 | No change |
| NM_178744    | Zbtb1         | 0.38271  | 1 | 0.593532 | 7.51642  | 10.8038 | No change |
| NM_001163024 | Mon2          | 0.38273  | 1 | 0.482051 | 15.1226  | 20.1092 | No change |
| NM_053163    | Mrpl36        | 0.382998 | 1 | 0.667247 | 17.7709  | 26.9017 | No change |
| NM_001199276 | Trnp1         | 0.383525 | 1 | 0.656211 | 6.56149  | 9.85577 | No change |
| NM_030256    | Bcl9l         | 0.383525 | 1 | 0.656211 | 3.28321  | 4.93159 | No change |
| NM_145823    | Pitpnc1       | 0.383608 | 1 | 0.617577 | 3.79744  | 5.55108 | No change |
| NM_009941    | Cox4i1        | 0.383743 | 1 | 0.487491 | 189.474  | 252.907 | No change |
| NM_013546    | Hebp1         | 0.383901 | 1 | 0.76808  | 7.94802  | 12.9237 | No change |
| NM_001081040 | Coq10a        | 0.384007 | 1 | 0.701443 | 5.05948  | 7.84632 | No change |
| NM_027294    | Cmtm8         | 0.384083 | 1 | 0.874667 | 4.65056  | 8.1642  | No change |
| NM_007478    | Arf3          | 0.384401 | 1 | 0.490418 | 35.357   | 47.2901 | No change |
| NM_010617    | Kif13a        | 0.3845   | 1 | 0.576287 | 5.30945  | 7.53988 | No change |
| NM_028274    | Exosc6        | 0.384585 | 1 | 0.664199 | 13.1538  | 19.8692 | No change |
| NM_019634    | Tspan7        | 0.384766 | 1 | 0.898842 | 2.51429  | 4.49199 | No change |
| NM_178005    | Lrrtm2        | 0.384774 | 1 | 0.814295 | 1.16831  | 1.96358 | No change |
| NM_011794    | Bpnt1         | 0.384979 | 1 | 0.627087 | 10.2847  | 15.1347 | No change |
| NM_018788    | Extl3         | 0.385005 | 1 | 0.606699 | 4.51174  | 6.54501 | No change |
| NM_010546    | Ikbb          | 0.385502 | 1 | 0.547173 | 11.4362  | 15.9131 | No change |
| NM_008720    | Npc1          | 0.385596 | 1 | 0.624512 | 4.42856  | 6.50515 | No change |
| NM_001159572 | 4632428N05Rik | 0.385945 | 1 | 0.733431 | 2.15857  | 3.42426 | No change |
| NM_198619    | Zfp933        | 0.386188 | 1 | 0.601276 | 6.76089  | 9.77047 | No change |
| NM_011680    | Usf2          | 0.386193 | 1 | 0.62754  | 9.33465  | 13.7409 | No change |
| NM_026660    | Mfsd10        | 0.386266 | 1 | 0.85082  | 3.05169  | 5.26546 | No change |
| NM_080643    | Caskin2       | 0.386822 | 1 | 0.585647 | 7.15821  | 10.232  | No change |
| NM_010395    | H2-T10        | 0.38696  | 1 | 0.928299 | 2.42966  | 4.43479 | No change |
| NM_152822    | Las1l         | 0.386976 | 1 | 0.592884 | 12.0984  | 17.3813 | No change |
| NM_021897    | Trp53inp1     | 0.386987 | 1 | 0.521862 | 13.9463  | 19.0661 | No change |
| NM_021281    | Ctss          | 0.387046 | 1 | 0.637001 | 15.4816  | 22.9413 | No change |
| NM_001018042 | Sp3           | 0.387057 | 1 | 0.522173 | 17.9449  | 24.5379 | No change |
| NM_001159633 | Slc44a1       | 0.387106 | 1 | 0.793596 | 3.84786  | 6.37154 | No change |
| NM_153780    | 2610044O15Rik | 0.387186 | 1 | 0.741301 | 6.90694  | 11.0182 | No change |
| NM_138950    | Wdr81         | 0.387391 | 1 | 0.627987 | 3.28845  | 4.84218 | No change |
| NM_028343    | Tmem135       | 0.387446 | 1 | 0.601253 | 7.86947  | 11.3722 | No change |
| NM_028807    | 1200009I06Rik | 0.387628 | 1 | 0.865927 | 1.78822  | 3.11921 | No change |
| NM_001164793 | Grinl1a       | 0.387711 | 1 | 0.534013 | 29.2954  | 40.3907 | No change |
| NM_009238    | Sox4          | 0.387734 | 1 | 0.732984 | 3.58731  | 5.68882 | No change |
| NM_016904    | Cks1b         | 0.387892 | 1 | 0.745467 | 12.9811  | 20.7691 | No change |
| NM_144902    | Slc35a3       | 0.387926 | 1 | 0.536624 | 15.2816  | 21.1077 | No change |
| NM_001077687 | Lrba          | 0.388585 | 1 | 0.524475 | 8.38115  | 11.4788 | No change |
| NM_020569    | Park7         | 0.388597 | 1 | 0.536546 | 68.844   | 95.0853 | No change |
| NM_016900    | Cav2          | 0.388614 | 1 | 0.645537 | 8.00356  | 11.9313 | No change |
| NM_025936    | Rars          | 0.388723 | 1 | 0.555515 | 22.7949  | 31.9034 | No change |
| NM_139311    | Mllt6         | 0.388869 | 1 | 0.571031 | 5.56892  | 7.87914 | No change |
| NM_028932    | Eaf1          | 0.388903 | 1 | 0.591743 | 7.64682  | 10.977  | No change |
| NM_008776    | Pafah1b3      | 0.388965 | 1 | 0.661948 | 20.0267  | 30.2017 | No change |
| NM_145684    | Alox12e       | 0.38911  | 1 | 1.30148  | 0.513114 | 1.24367 | No change |
| NM_022325    | Ctsz          | 0.389117 | 1 | 0.657541 | 12.958   | 19.481  | No change |
| NM_172372    | Wdr45         | 0.389498 | 1 | 0.754312 | 6.00035  | 9.66065 | No change |
| NM_145985    | Arcn1         | 0.389532 | 1 | 0.476978 | 52.643   | 69.7541 | No change |
| NM_009381    | Thrsp         | 0.389897 | 1 | 1.13939  | 1.81282  | 3.87312 | No change |
| NM_172516    | Dstyk         | 0.390133 | 1 | 0.571062 | 6.429    | 9.09615 | No change |
| NM_144534    | Tmem38a       | 0.390363 | 1 | 0.985531 | 1.52952  | 2.91137 | No change |
| NM_025287    | Spop          | 0.390962 | 1 | 0.572614 | 14.1224  | 20.0028 | No change |
| NM_023627    | Isyna1        | 0.391151 | 1 | 0.479563 | 96.6904  | 128.349 | No change |
| NM_030210    | Aacs          | 0.391185 | 1 | 0.617498 | 8.12682  | 11.8784 | No change |
| NM_001109988 | D0H4S114      | 0.391234 | 1 | 0.878227 | 2.29652  | 4.04132 | No change |
| NR_029443    | 4933407K13Rik | 0.391339 | 1 | 0.621561 | 7.36978  | 10.8027 | No change |
| NM_172529    | Gnptg         | 0.39146  | 1 | 0.633333 | 18.1857  | 26.878  | No change |
| NM_001195390 | Commd7        | 0.391903 | 1 | 0.655425 | 5.70176  | 8.55902 | No change |
| NR_002866    | Dio3os        | 0.391937 | 1 | 1.83632  | 0.490412 | 1.79618 | No change |
| NM_001102436 | Acbd5         | 0.392037 | 1 | 0.547012 | 15.7115  | 21.859  | No change |
| NM_009433    | Tspyl1        | 0.392195 | 1 | 0.572623 | 15.3035  | 21.6758 | No change |
| NM_026158    | Isoc2b        | 0.392225 | 1 | 0.748399 | 9.29239  | 14.8975 | No change |
| NR_028546    | Snora7a       | 0.392238 | 1 | 0.95579  | 28.0933  | 52.3128 | No change |
| NM_031406    | Slc12a9       | 0.392346 | 1 | 0.805733 | 2.16542  | 3.61662 | No change |
| NM_016792    | Txn1          | 0.392414 | 1 | 0.543616 | 23.2128  | 32.2189 | No change |
| NM_011609    | Tnfrsf1a      | 0.392796 | 1 | 0.691831 | 6.66206  | 10.2606 | No change |
| NM_011639    | Trip6         | 0.393017 | 1 | 0.721272 | 6.69211  | 10.5239 | No change |
| NM_172711    | Guf1          | 0.393069 | 1 | 0.667453 | 4.32734  | 6.55106 | No change |
| NM_175669    | Gpr82         | 0.393185 | 1 | 0.762948 | 3.6563   | 5.92268 | No change |
| NM_001081034 | Fbxo11        | 0.393449 | 1 | 0.588242 | 8.77023  | 12.5585 | No change |
| NM_133933    | Rpn1          | 0.393527 | 1 | 0.476425 | 55.5706  | 73.6045 | No change |
| NM_033218    | Srebfl2       | 0.393547 | 1 | 0.598377 | 6.93879  | 10.0068 | No change |

|              |               |          |   |          |          |         |           |
|--------------|---------------|----------|---|----------|----------|---------|-----------|
| NM_001110009 | Apoc1         | 0.393682 | 1 | 0.621693 | 58.9959  | 86.4831 | No change |
| NM_024189    | Yaf2          | 0.393695 | 1 | 0.701281 | 6.01443  | 9.32516 | No change |
| NM_138601    | D10Jhu81e     | 0.393843 | 1 | 0.600199 | 22.9071  | 33.0776 | No change |
| NM_153403    | Eif2c1        | 0.394105 | 1 | 0.587226 | 5.07109  | 7.25634 | No change |
| NM_008669    | Naga          | 0.394144 | 1 | 0.585476 | 19.09    | 27.2828 | No change |
| NM_029930    | Fam115a       | 0.394191 | 1 | 0.717926 | 3.24413  | 5.08952 | No change |
| NM_008405    | Itgb2l        | 0.394257 | 1 | 0.813195 | 2.66207  | 4.4698  | No change |
| NM_007405    | Adcy6         | 0.394631 | 1 | 0.543589 | 10.1628  | 14.1054 | No change |
| NM_028148    | Scaf11        | 0.394979 | 1 | 0.508502 | 13.8141  | 18.7099 | No change |
| NM_026821    | D4Bwg0951e    | 0.395208 | 1 | 1.09183  | 1.31264  | 2.70431 | No change |
| NM_053109    | Clec2d        | 0.395223 | 1 | 0.701256 | 11.2519  | 17.4451 | No change |
| NM_029394    | Snx24         | 0.395283 | 1 | 0.891462 | 2.55516  | 4.53939 | No change |
| NM_021548    | Arpp19        | 0.395674 | 1 | 0.571604 | 10.7685  | 15.2413 | No change |
| NM_134160    | Mcoln3        | 0.395764 | 1 | 1.2451   | 0.81417  | 1.88703 | No change |
| NM_177355    | Plcx3         | 0.395764 | 1 | 1.2451   | 0.737491 | 1.70931 | No change |
| NM_133781    | Cab39         | 0.395948 | 1 | 0.495407 | 36.7539  | 49.328  | No change |
| NM_009304    | Syng2         | 0.396273 | 1 | 0.620391 | 17.2403  | 25.2493 | No change |
| NM_011828    | Hs2st1        | 0.396571 | 1 | 0.607426 | 6.20008  | 8.99812 | No change |
| NM_178789    | Tmem117       | 0.396739 | 1 | 0.886444 | 1.77929  | 3.14941 | No change |
| NM_029832    | Ddrk1         | 0.396819 | 1 | 0.584813 | 34.3717  | 49.0995 | No change |
| NM_199016    | Enpp4         | 0.396854 | 1 | 0.583195 | 8.45736  | 12.0676 | No change |
| NM_033565    | Aff4          | 0.396879 | 1 | 0.474491 | 22.7351  | 30.0724 | No change |
| NM_021280    | Plcg1         | 0.397058 | 1 | 0.551179 | 12.8543  | 17.9356 | No change |
| NM_133969    | Cyp4v3        | 0.397145 | 1 | 0.772066 | 3.02082  | 4.92491 | No change |
| NM_001039959 | Ahnak         | 0.397393 | 1 | 0.755663 | 9.32793  | 15.0308 | No change |
| NM_025827    | Lonp2         | 0.397505 | 1 | 0.561581 | 17.4901  | 24.5818 | No change |
| NM_008416    | Junb          | 0.397507 | 1 | 0.738097 | 5.90875  | 9.40306 | No change |
| NM_025960    | Trappc6a      | 0.397507 | 1 | 0.738097 | 14.1564  | 22.5282 | No change |
| NM_053267    | Selm          | 0.397976 | 1 | 1.11385  | 2.39769  | 5.02207 | No change |
| NM_030207    | Sfi1          | 0.39819  | 1 | 0.553207 | 13.9905  | 19.5485 | No change |
| NM_030704    | Hspb8         | 0.39836  | 1 | 0.760218 | 5.26928  | 8.51824 | No change |
| NM_198113    | Ssh3          | 0.398517 | 1 | 0.626061 | 9.32475  | 13.7108 | No change |
| NM_001083587 | Tns3          | 0.398578 | 1 | 0.553029 | 7.58119  | 10.5916 | No change |
| NM_145853    | Tpcn1         | 0.39878  | 1 | 0.624545 | 5.56284  | 8.1707  | No change |
| NM_027758    | Tbc1d9        | 0.398813 | 1 | 0.563191 | 9.69123  | 13.636  | No change |
| NM_144925    | Tnrc6a        | 0.398957 | 1 | 0.539847 | 8.07975  | 11.1848 | No change |
| NM_144905    | 6330416G13Rik | 0.399013 | 1 | 0.680281 | 4.4926   | 6.86266 | No change |
| NM_019786    | Tbk1          | 0.399026 | 1 | 0.581672 | 13.2529  | 18.8899 | No change |
| NM_021365    | Xlr4b         | 0.399531 | 1 | 0.988324 | 2.54314  | 4.84923 | No change |
| NM_029837    | Mppd2         | 0.399531 | 1 | 0.988324 | 1.37919  | 2.62982 | No change |
| NM_178641    | Inpp5f        | 0.399687 | 1 | 0.668682 | 3.77871  | 5.7251  | No change |
| NM_011504    | Stxbp3a       | 0.39969  | 1 | 0.633423 | 9.99338  | 14.77   | No change |
| NM_007836    | Gadd45a       | 0.399827 | 1 | 0.905747 | 3.75795  | 6.74507 | No change |
| NM_026829    | Mthfs         | 0.399827 | 1 | 0.905747 | 5.98924  | 10.75   | No change |
| NM_023142    | Arpc1b        | 0.399956 | 1 | 0.614104 | 18.6028  | 27.1241 | No change |
| NM_010437    | Hivep2        | 0.400024 | 1 | 0.575162 | 4.48067  | 6.35741 | No change |
| NM_001163502 | C130039O16Rik | 0.400059 | 1 | 0.692154 | 2.07322  | 3.19357 | No change |
| NM_001163746 | Pgm3          | 0.400377 | 1 | 0.570343 | 10.4407  | 14.7639 | No change |
| NM_177783    | Ubr3          | 0.400449 | 1 | 0.545544 | 7.98637  | 11.0995 | No change |
| NM_008349    | Ii10rb        | 0.400545 | 1 | 0.696536 | 7.91109  | 12.2239 | No change |
| NM_015733    | Casp9         | 0.400738 | 1 | 0.652594 | 5.27706  | 7.90511 | No change |
| NM_010700    | Ldlr          | 0.40079  | 1 | 0.650237 | 4.6462   | 6.94854 | No change |
| NM_013840    | Uxt           | 0.400906 | 1 | 1.03985  | 3.26293  | 6.46377 | No change |
| NR_028515    | Snora78       | 0.400906 | 1 | 1.03985  | 17.3123  | 34.2951 | No change |
| NM_001033430 | Jhdm1d        | 0.401109 | 1 | 0.49232  | 17.4068  | 23.3116 | No change |
| NM_025873    | Trit1         | 0.401409 | 1 | 0.78171  | 4.1633   | 6.83391 | No change |
| NM_011454    | Serpib6b      | 0.401448 | 1 | 0.814295 | 3.86142  | 6.48783 | No change |
| NM_177352    | Gk5           | 0.401448 | 1 | 0.814295 | 2.61412  | 4.39216 | No change |
| NM_175560    | Zfp747        | 0.401617 | 1 | 0.733169 | 4.2844   | 6.79393 | No change |
| NM_175318    | Spty2d1       | 0.401967 | 1 | 0.547103 | 12.3223  | 17.1441 | No change |
| NM_007615    | Ctnd1         | 0.402012 | 1 | 0.481438 | 40.2119  | 53.4466 | No change |
| NM_001045518 | Fam83b        | 0.402096 | 1 | 1.05575  | 0.82227  | 1.64826 | No change |
| NM_144515    | Zfp52         | 0.402285 | 1 | 0.73667  | 3.56835  | 5.67249 | No change |
| NM_001081113 | Ipo8          | 0.402295 | 1 | 0.58947  | 7.11365  | 10.1946 | No change |
| NM_153160    | Zcchc17       | 0.40266  | 1 | 0.620815 | 19.6582  | 28.7978 | No change |
| NM_172274    | Cc2d2a        | 0.402759 | 1 | 0.795033 | 1.47085  | 2.43739 | No change |
| NM_025987    | Ndufa6        | 0.402805 | 1 | 0.542989 | 123.456  | 171.273 | No change |
| NM_201359    | Tmem106c      | 0.402824 | 1 | 0.692274 | 9.74107  | 15.0059 | No change |
| NM_028211    | 2210016L21Rik | 0.403057 | 1 | 0.780431 | 6.59971  | 10.823  | No change |
| NM_027107    | 2310004N24Rik | 0.403272 | 1 | 0.757711 | 11.0489  | 17.8284 | No change |
| NM_178651    | Slc30a9       | 0.403343 | 1 | 0.560822 | 15.9573  | 22.4149 | No change |
| NM_021525    | Rcl1          | 0.40368  | 1 | 0.889815 | 2.78308  | 4.93737 | No change |
| NM_024197    | Ndufa10       | 0.403798 | 1 | 0.570093 | 40.2363  | 56.8865 | No change |
| NM_178870    | Hs3st3a1      | 0.403802 | 1 | 0.767859 | 2.39221  | 3.88799 | No change |
| NM_001114174 | Fam189a2      | 0.404019 | 1 | 0.593848 | 14.5239  | 20.878  | No change |
| NM_001113331 | Shc1          | 0.404157 | 1 | 0.589646 | 10.9226  | 15.655  | No change |

|              |               |          |   |          |          |          |           |
|--------------|---------------|----------|---|----------|----------|----------|-----------|
| NM_010489    | Hyal2         | 0.404259 | 1 | 0.703479 | 7.72691  | 11.9975  | No change |
| NM_172779    | Ddx26b        | 0.404458 | 1 | 0.682698 | 4.37411  | 6.6927   | No change |
| NM_031380    | Fstl3         | 0.404466 | 1 | 0.80147  | 3.99673  | 6.65344  | No change |
| NM_008885    | Pmp22         | 0.404467 | 1 | 0.665203 | 10.6029  | 16.0244  | No change |
| NM_001012518 | Ehmt1         | 0.404593 | 1 | 0.587086 | 7.89753  | 11.299   | No change |
| NM_153571    | Hscb          | 0.405188 | 1 | 0.819672 | 8.84164  | 14.9118  | No change |
| NM_008740    | Nsf           | 0.405296 | 1 | 0.560242 | 14.9382  | 20.9748  | No change |
| NM_001081959 | Klc1          | 0.406057 | 1 | 0.739296 | 4.58062  | 7.29489  | No change |
| NM_025950    | Cdc3711       | 0.406172 | 1 | 0.54258  | 29.018   | 40.2452  | No change |
| NM_001128606 | Epb4.1        | 0.406186 | 1 | 0.566001 | 10.2621  | 14.4671  | No change |
| NM_007834    | Dscr3         | 0.40663  | 1 | 0.594348 | 15.7352  | 22.6268  | No change |
| NM_010773    | Mbd2          | 0.406709 | 1 | 0.627684 | 14.579   | 21.4597  | No change |
| NM_133837    | Cdc123        | 0.406795 | 1 | 0.571087 | 30.7027  | 43.4373  | No change |
| NM_010329    | Pdpn          | 0.407164 | 1 | 0.624126 | 15.8375  | 23.2539  | No change |
| NM_028015    | Lass5         | 0.407298 | 1 | 0.57846  | 22.7802  | 32.3952  | No change |
| NM_144837    | BC018507      | 0.407379 | 1 | 0.548228 | 8.90798  | 12.4032  | No change |
| NM_133796    | Arhgdia       | 0.407779 | 1 | 0.523477 | 37.423   | 51.2154  | No change |
| NM_153117    | 9530068E07Rik | 0.408155 | 1 | 0.532594 | 35.7081  | 49.1799  | No change |
| NM_007791    | Csrp1         | 0.40861  | 1 | 0.562369 | 32.2477  | 45.3459  | No change |
| NM_010192    | Fem1a         | 0.408886 | 1 | 0.577536 | 6.92226  | 9.83755  | No change |
| NM_029891    | Nkrf          | 0.408991 | 1 | 0.825134 | 2.15523  | 3.6489   | No change |
| NM_008826    | Pfkl          | 0.409007 | 1 | 0.545738 | 19.5373  | 27.1558  | No change |
| NM_008624    | Mras          | 0.409121 | 1 | 0.708125 | 3.54342  | 5.51964  | No change |
| NM_027348    | Pmvk          | 0.409128 | 1 | 0.679759 | 15.2134  | 23.2283  | No change |
| NM_026639    | Art4          | 0.409272 | 1 | 0.724719 | 5.34975  | 8.43183  | No change |
| NM_001163307 | Pcgf2         | 0.409285 | 1 | 0.898126 | 1.99123  | 3.55344  | No change |
| NM_001168577 | Nat2          | 0.409285 | 1 | 0.898126 | 3.60393  | 6.43138  | No change |
| NM_001011687 | Rnase13       | 0.409399 | 1 | 0.630286 | 43.927   | 64.7756  | No change |
| NM_173181    | Fam164a       | 0.409673 | 1 | 0.651611 | 6.63545  | 9.9324   | No change |
| NM_153059    | Tmem5         | 0.409706 | 1 | 0.685012 | 12.3404  | 18.9116  | No change |
| NM_010440    | Hmg20b        | 0.409748 | 1 | 0.734509 | 7.35862  | 11.6787  | No change |
| NM_019643    | Fam60a        | 0.409872 | 1 | 0.637935 | 9.56363  | 14.1786  | No change |
| NM_028044    | Cnn3          | 0.410107 | 1 | 0.721537 | 6.54132  | 10.2866  | No change |
| NM_026467    | Rps27l        | 0.410443 | 1 | 0.758872 | 22.2296  | 35.8955  | No change |
| NM_001112738 | Atp5c1        | 0.410575 | 1 | 0.511204 | 75.4652  | 102.399  | No change |
| NM_009373    | Tgm2          | 0.410871 | 1 | 0.520496 | 32.1267  | 43.8756  | No change |
| NM_010764    | Man2b1        | 0.410882 | 1 | 0.602443 | 8.37927  | 12.1173  | No change |
| NM_026430    | Uxs1          | 0.411081 | 1 | 0.661343 | 16.4438  | 24.7829  | No change |
| NM_026395    | Rer1          | 0.411245 | 1 | 0.541727 | 52.614   | 72.926   | No change |
| NM_025440    | Mrps16        | 0.411585 | 1 | 0.698817 | 27.4585  | 42.4911  | No change |
| NM_022655    | Ireb2         | 0.411873 | 1 | 0.573642 | 8.84361  | 12.5338  | No change |
| NM_145963    | Kcnj14        | 0.411879 | 1 | 1.34832  | 0.422541 | 1.06095  | No change |
| NM_022980    | Rcan3         | 0.412048 | 1 | 0.724173 | 2.57459  | 4.05615  | No change |
| NM_011157    | Srgn          | 0.412158 | 1 | 0.622054 | 31.9488  | 46.8402  | No change |
| NM_001168655 | Socs2         | 0.412241 | 1 | 0.793392 | 3.87359  | 6.41049  | No change |
| NM_020558    | C1d           | 0.412375 | 1 | 0.68704  | 5.77436  | 8.86158  | No change |
| NM_001085410 | 1110020G09Rik | 0.412605 | 1 | 0.59074  | 11.2824  | 16.1823  | No change |
| NM_011856    | Odz2          | 0.412804 | 1 | 0.883735 | 0.551074 | 0.973137 | No change |
| NM_031392    | Wdr6          | 0.4129   | 1 | 0.557875 | 15.7201  | 22.0355  | No change |
| NM_001013755 | 5730409E04Rik | 0.412974 | 1 | 0.762382 | 3.59469  | 5.81885  | No change |
| NM_013902    | Fkbp3         | 0.412974 | 1 | 0.59854  | 40.9308  | 59.0281  | No change |
| NM_025729    | Tab3          | 0.413007 | 1 | 0.616171 | 5.03752  | 7.35508  | No change |
| NM_001080949 | Ttc5          | 0.413338 | 1 | 0.675562 | 10.2211  | 15.5593  | No change |
| NM_015774    | Ero1l         | 0.413448 | 1 | 0.57381  | 11.8311  | 16.7696  | No change |
| NM_001079905 | Repin1        | 0.413563 | 1 | 0.703183 | 5.16157  | 8.01184  | No change |
| NM_025494    | Atp6v1c1      | 0.413673 | 1 | 0.642823 | 11.8923  | 17.6911  | No change |
| NM_181043    | Mylip         | 0.413707 | 1 | 0.778506 | 6.97971  | 11.4286  | No change |
| NM_033444    | Clic1         | 0.413733 | 1 | 0.649613 | 20.2645  | 30.2897  | No change |
| NM_025522    | Dhrs7         | 0.413827 | 1 | 0.652778 | 17.5301  | 26.261   | No change |
| NR_028404    | Rgag4         | 0.414087 | 1 | 0.658438 | 5.03785  | 7.57701  | No change |
| NM_139297    | Ugp2          | 0.414162 | 1 | 0.581248 | 15.5853  | 22.206   | No change |
| NM_175326    | D330045A20Rik | 0.414311 | 1 | 0.807524 | 2.12547  | 3.55306  | No change |
| NM_026322    | Msra          | 0.41432  | 1 | 0.74812  | 6.07003  | 9.72652  | No change |
| NM_001163290 | Adck3         | 0.414394 | 1 | 0.618587 | 8.07288  | 11.8068  | No change |
| NM_172943    | Alkbh5        | 0.414454 | 1 | 0.543614 | 13.5222  | 18.7669  | No change |
| NM_001165254 | Ctage5        | 0.414471 | 1 | 0.618018 | 11.2749  | 16.4833  | No change |
| NM_054046    | Def8          | 0.414999 | 1 | 0.696752 | 4.30478  | 6.65156  | No change |
| NM_013709    | Sh3yl1        | 0.41516  | 1 | 0.777374 | 5.45982  | 8.93252  | No change |
| NM_026442    | Cmc1          | 0.415305 | 1 | 0.771463 | 8.3066   | 13.5329  | No change |
| NM_025798    | Hint3         | 0.415374 | 1 | 0.662332 | 30.6409  | 46.2103  | No change |
| NM_012021    | Prdx5         | 0.415508 | 1 | 0.562059 | 91.3707  | 128.452  | No change |
| NM_026765    | Uckl1         | 0.415685 | 1 | 0.666176 | 11.4421  | 17.3029  | No change |
| NM_028419    | Glrx5         | 0.4157   | 1 | 0.825874 | 7.79362  | 13.2003  | No change |
| NM_054099    | 1110038F14Rik | 0.41602  | 1 | 0.90131  | 4.59935  | 8.22536  | No change |
| NM_001080557 | Vamp1         | 0.416704 | 1 | 0.67607  | 6.09868  | 9.28685  | No change |
| NM_026162    | Plxdc2        | 0.416792 | 1 | 0.739459 | 3.78364  | 6.02551  | No change |

|              |               |          |   |          |          |         |           |
|--------------|---------------|----------|---|----------|----------|---------|-----------|
| NM_007481    | Arf6          | 0.416927 | 1 | 0.545235 | 22.1164  | 30.7291 | No change |
| NM_001081468 | Gtf2ird1      | 0.416948 | 1 | 0.572465 | 16.8479  | 23.8578 | No change |
| NM_021307    | Zfp112        | 0.416959 | 1 | 0.964711 | 1.09299  | 2.04708 | No change |
| NM_177470    | Acaa2         | 0.416959 | 1 | 0.61853  | 21.6977  | 31.7316 | No change |
| NR_027891    | 2900092D14Rik | 0.41709  | 1 | 0.746959 | 4.07217  | 6.51956 | No change |
| NM_145619    | Parp3         | 0.417315 | 1 | 0.709958 | 5.66437  | 8.83413 | No change |
| NM_011843    | Esyt1         | 0.417556 | 1 | 0.620583 | 8.6998   | 12.7412 | No change |
| NM_138303    | Yipf2         | 0.417697 | 1 | 0.54578  | 38.0318  | 52.8622 | No change |
| NM_001110140 | Atp2a2        | 0.418053 | 1 | 0.48682  | 65.1572  | 86.9242 | No change |
| NM_001163610 | Nhsl2         | 0.418131 | 1 | 0.739006 | 0.945645 | 1.50545 | No change |
| NM_030732    | Tbl1xr1       | 0.418257 | 1 | 0.560511 | 8.21531  | 11.5367 | No change |
| NM_177772    | Bpil2         | 0.418402 | 1 | 1.28378  | 0.5688   | 1.35687 | No change |
| NM_029823    | Arxes2        | 0.418444 | 1 | 0.746398 | 7.60287  | 12.1672 | No change |
| NM_175387    | Rbfox2        | 0.418451 | 1 | 0.632256 | 4.12367  | 6.08886 | No change |
| NM_138665    | Sardh         | 0.418529 | 1 | 0.649064 | 5.39746  | 8.06428 | No change |
| NM_022995    | Pmepa1        | 0.418646 | 1 | 0.722903 | 3.03013  | 4.76916 | No change |
| NM_011245    | Rasgrf1       | 0.418694 | 1 | 0.735343 | 2.98354  | 4.73739 | No change |
| NM_020582    | Atp5j2        | 0.418727 | 1 | 0.578857 | 109.726  | 156.074 | No change |
| NM_001081009 | Parp8         | 0.418751 | 1 | 0.611707 | 11.5327  | 16.7853 | No change |
| NM_009294    | Stx4a         | 0.418767 | 1 | 0.934034 | 3.23318  | 5.9209  | No change |
| NM_027135    | Sec24d        | 0.419196 | 1 | 0.620701 | 8.43832  | 12.3591 | No change |
| NM_145944    | Ccdc25        | 0.419232 | 1 | 0.641179 | 11.9545  | 17.7624 | No change |
| NM_138650    | Dgkg          | 0.419345 | 1 | 0.750043 | 2.08889  | 3.35155 | No change |
| NM_001082414 | Sh3d19        | 0.4194   | 1 | 0.629776 | 4.6404   | 6.8399  | No change |
| NM_001033277 | Spryd3        | 0.419402 | 1 | 0.575435 | 22.6495  | 32.1395 | No change |
| NM_028108    | Naa50         | 0.419468 | 1 | 0.591333 | 9.99353  | 14.3392 | No change |
| NM_022993    | Lrp10         | 0.419475 | 1 | 0.607669 | 12.4485  | 18.0669 | No change |
| NM_009260    | Spnb2         | 0.419494 | 1 | 0.486057 | 34.6116  | 46.1496 | No change |
| NM_023281    | Sdha          | 0.419623 | 1 | 0.497911 | 78.8586  | 106.017 | No change |
| NM_172656    | Stradb        | 0.419892 | 1 | 0.728565 | 5.74508  | 9.07844 | No change |
| NM_001159751 | Tcea1         | 0.419926 | 1 | 0.573607 | 22.2071  | 31.4715 | No change |
| NM_001159905 | Zfand2b       | 0.419955 | 1 | 1.04347  | 2.37524  | 4.71445 | No change |
| NM_011324    | Scnn1a        | 0.419976 | 1 | 0.758441 | 3.12801  | 5.04876 | No change |
| NM_030165    | Csgalnact2    | 0.420144 | 1 | 0.669671 | 5.69349  | 8.63061 | No change |
| NM_008944    | Psma2         | 0.420166 | 1 | 0.659944 | 23.9431  | 36.0473 | No change |
| NM_001204912 | 2410017P09Rik | 0.420223 | 1 | 0.685961 | 4.5501   | 6.97694 | No change |
| NM_010697    | Ldb1          | 0.420285 | 1 | 0.611933 | 15.7784  | 22.9681 | No change |
| NM_011738    | Ywhah         | 0.42034  | 1 | 0.572037 | 33.1476  | 46.9246 | No change |
| NM_033524    | Spred1        | 0.420451 | 1 | 0.650608 | 8.232    | 12.3125 | No change |
| NM_013551    | Hmbs          | 0.420635 | 1 | 0.653641 | 15.0652  | 22.5809 | No change |
| NM_175168    | Ptk7          | 0.420823 | 1 | 0.675249 | 4.70079  | 7.15379 | No change |
| NM_009729    | Atp6v0c       | 0.420975 | 1 | 0.533298 | 93.9734  | 129.486 | No change |
| NR_037854    | Atp6v0c-ps2   | 0.420975 | 1 | 0.533298 | 96.7473  | 133.308 | No change |
| NM_027366    | Ly6g6e        | 0.421562 | 1 | 1.05871  | 2.39052  | 4.79869 | No change |
| NM_013505    | Dsc2          | 0.421623 | 1 | 0.753157 | 2.58823  | 4.1618  | No change |
| NM_133668    | Slc25a3       | 0.421863 | 1 | 0.528683 | 79.2342  | 108.826 | No change |
| NM_001081047 | Cnksr1        | 0.422386 | 1 | 0.874389 | 2.37301  | 4.16137 | No change |
| NM_027154    | Tmbim1        | 0.422412 | 1 | 0.686154 | 8.02872  | 12.3124 | No change |
| NM_015728    | Slc33a1       | 0.422422 | 1 | 0.546019 | 28.6035  | 39.7633 | No change |
| NM_139145    | Hlcs          | 0.422469 | 1 | 0.716851 | 3.04267  | 4.76824 | No change |
| NM_001163945 | Rpl3l         | 0.422477 | 1 | 0.853887 | 4.72408  | 8.16282 | No change |
| NM_008856    | Prkch         | 0.422477 | 1 | 0.853887 | 1.96407  | 3.39376 | No change |
| NM_178716    | Tnpo1         | 0.422546 | 1 | 0.505176 | 37.4514  | 50.6039 | No change |
| NM_178763    | Zfp750        | 0.422631 | 1 | 0.756998 | 3.45993  | 5.57858 | No change |
| NM_025848    | Sdhd          | 0.422964 | 1 | 0.563975 | 52.8256  | 74.3609 | No change |
| NM_145567    | Hibadh        | 0.423147 | 1 | 0.56684  | 37.6599  | 53.1187 | No change |
| NM_009612    | Acvr1l        | 0.423158 | 1 | 0.805169 | 2.3263   | 3.88166 | No change |
| NM_178772    | Nceh1         | 0.423158 | 1 | 0.805169 | 1.91917  | 3.20233 | No change |
| NM_008124    | Gjb1          | 0.423331 | 1 | 0.836745 | 4.75179  | 8.11008 | No change |
| NM_001101445 | Cyp4f17       | 0.42351  | 1 | 1.13694  | 1.23496  | 2.62908 | No change |
| NM_009282    | Stag1         | 0.423595 | 1 | 0.596389 | 7.43314  | 10.7029 | No change |
| NM_018789    | Foxo4         | 0.424086 | 1 | 0.740486 | 3.98938  | 6.3572  | No change |
| NM_022656    | Nisch         | 0.424508 | 1 | 0.531193 | 21.4843  | 29.5595 | No change |
| NM_029948    | Pramef12      | 0.424545 | 1 | 0.747727 | 4.90117  | 7.85031 | No change |
| NM_178918    | Utp15         | 0.424572 | 1 | 0.680136 | 4.8619   | 7.42422 | No change |
| NM_031257    | Plekha2       | 0.424932 | 1 | 0.675891 | 4.12508  | 6.28027 | No change |
| NM_017366    | Acadvl        | 0.424957 | 1 | 0.594051 | 21.6378  | 31.105  | No change |
| NM_053141    | Pcdhb16       | 0.425071 | 1 | 0.951302 | 0.793468 | 1.47124 | No change |
| NM_032002    | Nrg4          | 0.425314 | 1 | 0.889959 | 2.85568  | 5.06409 | No change |
| NM_001170960 | Dtwd2         | 0.425418 | 1 | 0.94393  | 1.51241  | 2.78922 | No change |
| NM_172769    | Sc5d          | 0.425433 | 1 | 0.612457 | 16.8577  | 24.5475 | No change |
| NM_172381    | Al314180      | 0.425476 | 1 | 0.512886 | 30.4944  | 41.4249 | No change |
| NM_178935    | Txlng         | 0.42553  | 1 | 0.673282 | 5.54688  | 8.42936 | No change |
| NM_001085492 | Rere          | 0.425596 | 1 | 0.611137 | 5.16763  | 7.51793 | No change |
| NM_011723    | Xdh           | 0.42564  | 1 | 0.667009 | 4.86194  | 7.35595 | No change |
| NM_008628    | Msh2          | 0.425766 | 1 | 0.736488 | 4.28739  | 6.81262 | No change |

|              |               |          |   |          |          |         |           |
|--------------|---------------|----------|---|----------|----------|---------|-----------|
| NM_133978    | Cmtm7         | 0.425856 | 1 | 0.936977 | 4.58412  | 8.41128 | No change |
| NM_021524    | Nampt         | 0.425915 | 1 | 0.614609 | 8.18474  | 11.9362 | No change |
| NM_029869    | Zkscan1       | 0.426066 | 1 | 0.546104 | 11.734   | 16.3129 | No change |
| NM_025448    | Ssr2          | 0.426072 | 1 | 0.579518 | 48.19    | 68.5746 | No change |
| NM_001172071 | Senp8         | 0.426116 | 1 | 0.711528 | 4.13526  | 6.45589 | No change |
| NR_028108    | Myeov2        | 0.426229 | 1 | 0.568096 | 99.3693  | 140.28  | No change |
| NM_001081076 | Gucy2g        | 0.426232 | 1 | 0.73311  | 3.45866  | 5.48262 | No change |
| NM_030684    | Trim34a       | 0.426391 | 1 | 0.809701 | 3.24153  | 5.42606 | No change |
| NM_001048204 | Zfp455        | 0.426486 | 1 | 1.0187   | 1.18211  | 2.30303 | No change |
| NM_009730    | Atrn          | 0.426516 | 1 | 0.598329 | 5.16894  | 7.45272 | No change |
| NM_021539    | Wsb2          | 0.426591 | 1 | 0.598017 | 18.8414  | 27.1601 | No change |
| NM_199299    | Phf15         | 0.426845 | 1 | 0.653437 | 4.17015  | 6.24935 | No change |
| NM_153680    | Snx17         | 0.426924 | 1 | 0.669702 | 11.3462  | 17.1988 | No change |
| NM_008716    | Notch3        | 0.427031 | 1 | 0.655425 | 3.14991  | 4.72701 | No change |
| NM_152813    | Plcd3         | 0.427384 | 1 | 0.742813 | 4.1848   | 6.67933 | No change |
| NM_178391    | Setmar        | 0.427546 | 1 | 1.03139  | 1.90584  | 3.74794 | No change |
| NM_178407    | Arap2         | 0.427559 | 1 | 0.552361 | 11.8238  | 16.5094 | No change |
| NM_080289    | Grhpr         | 0.427572 | 1 | 0.918304 | 3.97921  | 7.20252 | No change |
| NM_011186    | Psmb5         | 0.427801 | 1 | 0.60539  | 48.409   | 70.1425 | No change |
| NM_172597    | Txndc16       | 0.427848 | 1 | 0.548777 | 23.0464  | 32.0992 | No change |
| NM_025431    | Llph          | 0.427884 | 1 | 0.693321 | 15.7139  | 24.2186 | No change |
| NM_001024560 | Snx32         | 0.427958 | 1 | 0.750107 | 7.34944  | 11.7911 | No change |
| NM_024457    | Rap1b         | 0.428103 | 1 | 0.592318 | 25.5817  | 36.7294 | No change |
| NM_021330    | Acp1          | 0.428151 | 1 | 0.559769 | 25.1227  | 35.2601 | No change |
| NM_007499    | Atm           | 0.428392 | 1 | 0.555692 | 6.98444  | 9.77495 | No change |
| NM_183138    | Tet3          | 0.428396 | 1 | 0.619279 | 3.32936  | 4.8712  | No change |
| NM_001002267 | Tmem158       | 0.428543 | 1 | 1.16276  | 1.12603  | 2.44412 | No change |
| NM_001033537 | Pgap3         | 0.428544 | 1 | 0.772818 | 4.34143  | 7.0784  | No change |
| NM_019710    | Smc1a         | 0.428854 | 1 | 0.627825 | 8.39124  | 12.3509 | No change |
| NM_146162    | Tmem119       | 0.428941 | 1 | 1.04514  | 1.40862  | 2.7984  | No change |
| NM_019941    | Zfp235        | 0.428977 | 1 | 0.907404 | 1.494    | 2.6828  | No change |
| NM_172398    | Akr1b10       | 0.429211 | 1 | 0.873592 | 4.52147  | 7.92324 | No change |
| NM_001037746 | Prps1l3       | 0.429306 | 1 | 0.565939 | 18.0408  | 25.4297 | No change |
| NM_025939    | Paics         | 0.429525 | 1 | 0.564949 | 30.9356  | 43.5755 | No change |
| NM_001048250 | 2810008M24Rik | 0.429544 | 1 | 0.726298 | 7.73951  | 12.2091 | No change |
| NM_001130458 | Tcn2          | 0.429833 | 1 | 0.64978  | 13.1394  | 19.6396 | No change |
| NM_145412    | Chtf8         | 0.430059 | 1 | 0.568114 | 24.1345  | 34.0707 | No change |
| NM_001113549 | Ltbp4         | 0.430111 | 1 | 0.643299 | 5.65521  | 8.41454 | No change |
| NM_181517    | Ipo7          | 0.430325 | 1 | 0.630876 | 10.5087  | 15.5006 | No change |
| NM_153055    | Sec63         | 0.430377 | 1 | 0.590958 | 8.59608  | 12.3301 | No change |
| NM_008183    | Gstm2         | 0.430414 | 1 | 0.519671 | 164.481  | 224.492 | No change |
| NM_011486    | Stat3         | 0.430655 | 1 | 0.560479 | 18.079   | 25.3865 | No change |
| NM_008876    | Pld2          | 0.430723 | 1 | 1.06008  | 0.733417 | 1.47322 | No change |
| NM_021506    | Sh3rf1        | 0.430776 | 1 | 0.676791 | 4.12965  | 6.29089 | No change |
| NM_001013391 | Cpsf6         | 0.430779 | 1 | 0.539814 | 17.5352  | 24.2709 | No change |
| NM_001170488 | Tprkb         | 0.430951 | 1 | 0.741437 | 5.84662  | 9.32225 | No change |
| NM_001168497 | Plscr3        | 0.431042 | 1 | 0.761183 | 4.01934  | 6.49908 | No change |
| NM_001195765 | Gm13611       | 0.431099 | 1 | 0.601148 | 106.39   | 153.696 | No change |
| NM_008268    | Hoxb5         | 0.431347 | 1 | 0.892946 | 2.94063  | 5.22529 | No change |
| NM_001048057 | Rpl38         | 0.431603 | 1 | 0.715593 | 42.8734  | 67.1216 | No change |
| NM_177239    | Mysm1         | 0.431617 | 1 | 0.598384 | 6.46297  | 9.3186  | No change |
| NM_011479    | Sptlc2        | 0.431665 | 1 | 0.601453 | 12.3086  | 17.7852 | No change |
| NM_028994    | Pck2          | 0.431836 | 1 | 0.820919 | 2.37776  | 4.01185 | No change |
| NM_001204917 | Gm8394        | 0.431859 | 1 | 0.65395  | 36.4784  | 54.6838 | No change |
| NM_146249    | Zfp119b       | 0.43189  | 1 | 0.832341 | 4.00872  | 6.8192  | No change |
| NM_144870    | Ndufs8        | 0.431907 | 1 | 0.635356 | 33.001   | 48.8298 | No change |
| NM_028320    | Adipor1       | 0.431971 | 1 | 0.560415 | 40.4935  | 56.8582 | No change |
| NM_019998    | Alg2          | 0.43201  | 1 | 0.637417 | 10.1973  | 15.1102 | No change |
| NM_177157    | Gchfr         | 0.432019 | 1 | 1.22933  | 2.54839  | 5.82089 | No change |
| NM_001033297 | Gm561         | 0.432256 | 1 | 0.954074 | 9.26202  | 17.2048 | No change |
| NM_008377    | Lrig1         | 0.43229  | 1 | 0.690173 | 3.90146  | 5.99945 | No change |
| NM_177327    | Wwp1          | 0.432331 | 1 | 0.560661 | 16.193   | 22.7409 | No change |
| NM_026969    | Sec31a        | 0.43247  | 1 | 0.512778 | 50.44    | 68.5139 | No change |
| NM_009679    | Ap2m1         | 0.432535 | 1 | 0.584396 | 28.2566  | 40.3453 | No change |
| NM_001001144 | Scap          | 0.432633 | 1 | 0.666205 | 5.56113  | 8.40856 | No change |
| NM_011419    | Kdm5d         | 0.432644 | 1 | 0.677076 | 3.96171  | 6.03616 | No change |
| NM_010792    | Mettl1        | 0.43265  | 1 | 0.988324 | 4.16429  | 7.93181 | No change |
| NM_026585    | D6Wsu116e     | 0.432792 | 1 | 0.638399 | 7.23366  | 10.726  | No change |
| NM_001040684 | Hsd3b7        | 0.43291  | 1 | 0.725535 | 8.38204  | 13.2151 | No change |
| NM_024190    | Chmp1b        | 0.433134 | 1 | 0.619449 | 15.074   | 22.0568 | No change |
| NM_026740    | Slc46a1       | 0.433367 | 1 | 0.764341 | 5.79009  | 9.38301 | No change |
| NM_026823    | Arl8a         | 0.433411 | 1 | 0.842553 | 4.25856  | 7.2972  | No change |
| NM_147219    | Abca5         | 0.433917 | 1 | 0.555998 | 10.9904  | 15.3844 | No change |
| NM_030250    | Nus1          | 0.434119 | 1 | 0.612254 | 9.0628   | 13.1944 | No change |
| NM_019390    | Lmna          | 0.43422  | 1 | 0.647035 | 18.9905  | 28.3299 | No change |
| NM_145622    | Zfp71-rs1     | 0.434306 | 1 | 0.717595 | 4.01262  | 6.29077 | No change |

|              |               |          |   |          |          |         |           |
|--------------|---------------|----------|---|----------|----------|---------|-----------|
| NM_145542    | Ahcyl1        | 0.434649 | 1 | 0.548739 | 27.0917  | 37.7317 | No change |
| NM_001024606 | Pdp2          | 0.434777 | 1 | 0.710691 | 4.8016   | 7.49105 | No change |
| NM_001037913 | Ccdc107       | 0.434813 | 1 | 0.876526 | 7.53437  | 13.2293 | No change |
| NM_028840    | Armc1         | 0.435075 | 1 | 0.648108 | 9.84404  | 14.6962 | No change |
| NM_028643    | Efha1         | 0.435163 | 1 | 0.648941 | 12.3999  | 18.5227 | No change |
| NM_007711    | Cln3          | 0.435211 | 1 | 0.546041 | 20.0167  | 27.8257 | No change |
| NM_029976    | Cdkn2aipnl    | 0.435487 | 1 | 0.687282 | 10.9176  | 16.7538 | No change |
| NM_007874    | Reep5         | 0.435761 | 1 | 0.627867 | 12.3412  | 18.1646 | No change |
| NM_008820    | Pepd          | 0.435835 | 1 | 0.70643  | 9.44033  | 14.6836 | No change |
| NM_001081241 | Fam65a        | 0.436029 | 1 | 1.03324  | 0.758815 | 1.49384 | No change |
| NM_001122641 | Arhgap17      | 0.436157 | 1 | 0.681596 | 6.59866  | 10.0856 | No change |
| NM_011873    | Dazap2        | 0.436401 | 1 | 0.533576 | 79.3704  | 109.381 | No change |
| NM_008675    | Nbl1          | 0.436417 | 1 | 0.687361 | 11.6287  | 17.8459 | No change |
| NM_008945    | Psbm4         | 0.436473 | 1 | 0.551095 | 108.836  | 151.828 | No change |
| NM_013706    | Cd52          | 0.436503 | 1 | 0.539393 | 255.91   | 354.102 | No change |
| NM_133718    | Tmem30a       | 0.436527 | 1 | 0.521246 | 52.2126  | 71.3398 | No change |
| NM_010761    | Ccnbdp1       | 0.436718 | 1 | 0.80417  | 5.80774  | 9.68173 | No change |
| NM_145973    | Eli3          | 0.436813 | 1 | 0.727343 | 8.99264  | 14.1952 | No change |
| NM_177047    | Auts2         | 0.43682  | 1 | 0.762091 | 1.95541  | 3.16359 | No change |
| NM_025691    | Srp72         | 0.437066 | 1 | 0.559967 | 24.842   | 34.8699 | No change |
| NR_015483    | 2610203C20Rik | 0.437475 | 1 | 0.635594 | 13.0032  | 19.2427 | No change |
| NM_025611    | Cul7          | 0.437817 | 1 | 0.710405 | 3.11343  | 4.85618 | No change |
| NM_009302    | Swap70        | 0.437822 | 1 | 0.706312 | 4.40439  | 6.84994 | No change |
| NM_010197    | Fgf1          | 0.437864 | 1 | 0.727085 | 3.88669  | 6.1341  | No change |
| NM_029349    | 2310035C23Rik | 0.438192 | 1 | 0.615933 | 7.86561  | 11.4806 | No change |
| NM_026009    | Ccdc47        | 0.438326 | 1 | 0.570787 | 23.5011  | 33.2374 | No change |
| NM_008388    | Eif3e         | 0.438453 | 1 | 0.542652 | 81.3612  | 112.834 | No change |
| NM_001164503 | Akap11        | 0.438598 | 1 | 0.527163 | 18.5335  | 25.4272 | No change |
| NM_029250    | Etnk1         | 0.438599 | 1 | 0.516263 | 35.4152  | 48.2215 | No change |
| NM_025937    | Nkap          | 0.438653 | 1 | 0.809987 | 2.09308  | 3.50364 | No change |
| NM_026244    | Slc39a9       | 0.438755 | 1 | 0.620168 | 7.68888  | 11.2559 | No change |
| NM_007570    | Btg2          | 0.438797 | 1 | 0.706254 | 5.80963  | 9.035   | No change |
| NM_001113560 | Glo1          | 0.438939 | 1 | 0.787044 | 11.3958  | 18.7663 | No change |
| NM_177798    | Frs2          | 0.439356 | 1 | 0.620907 | 7.06248  | 10.3443 | No change |
| NR_033228    | E030024N20Rik | 0.43939  | 1 | 0.536108 | 22.9315  | 31.6576 | No change |
| NM_026232    | Slc25a30      | 0.439473 | 1 | 0.642909 | 18.5875  | 27.6475 | No change |
| NM_144788    | Hectd1        | 0.439489 | 1 | 0.499214 | 43.12    | 58.0207 | No change |
| NM_023500    | Xk            | 0.439595 | 1 | 0.729375 | 2.99888  | 4.74051 | No change |
| NM_001163064 | AU041133      | 0.439646 | 1 | 0.81787  | 3.25445  | 5.47835 | No change |
| NM_007639    | Cd1d1         | 0.439751 | 1 | 0.981405 | 2.11764  | 4.01219 | No change |
| NM_026065    | Mrp142        | 0.440029 | 1 | 0.719052 | 24.5914  | 38.5903 | No change |
| NM_009656    | Aldh2         | 0.440061 | 1 | 0.554735 | 46.7041  | 65.3177 | No change |
| NM_001081282 | Ibtk          | 0.440097 | 1 | 0.57977  | 12.187   | 17.3442 | No change |
| NM_029653    | Dapk1         | 0.440141 | 1 | 0.755807 | 2.14312  | 3.45172 | No change |
| NM_001168516 | Zdhhc24       | 0.440298 | 1 | 0.748061 | 5.86662  | 9.39706 | No change |
| NM_007907    | Eef2          | 0.441106 | 1 | 0.472933 | 444.349  | 587.088 | No change |
| NM_008799    | Pdcd2         | 0.441141 | 1 | 0.784791 | 9.3961   | 15.4479 | No change |
| NM_207680    | Bcl2l11       | 0.44128  | 1 | 0.723692 | 3.16849  | 4.98845 | No change |
| NM_145537    | Edem2         | 0.441642 | 1 | 0.613974 | 19.4739  | 28.3847 | No change |
| NM_172710    | Sel1l3        | 0.44166  | 1 | 0.706085 | 4.06233  | 6.31671 | No change |
| NM_001163688 | Ptptra        | 0.441764 | 1 | 0.676007 | 6.74833  | 10.2734 | No change |
| NM_009052    | Bex1          | 0.442006 | 1 | 1.26913  | 1.69001  | 3.97918 | No change |
| NM_145607    | Ttc13         | 0.44202  | 1 | 0.647346 | 10.1945  | 15.2106 | No change |
| NM_011749    | Zfp148        | 0.442024 | 1 | 0.570275 | 8.69037  | 12.2861 | No change |
| NM_024188    | Oxct1         | 0.442214 | 1 | 0.612358 | 13.17    | 19.1745 | No change |
| NM_026080    | Mrps24        | 0.442214 | 1 | 0.796998 | 9.7584   | 16.1833 | No change |
| NM_007988    | Fasn          | 0.442631 | 1 | 0.510251 | 30.3092  | 41.0967 | No change |
| NM_007566    | Birc6         | 0.44288  | 1 | 0.526095 | 12.2001  | 16.7255 | No change |
| NM_207533    | Dbx2          | 0.443077 | 1 | 1.87939  | 0.276194 | 1.0432  | No change |
| NM_025770    | Atg10         | 0.44312  | 1 | 0.848121 | 4.59133  | 7.89745 | No change |
| NM_001004176 | Mami3         | 0.443218 | 1 | 0.655504 | 4.45213  | 6.68079 | No change |
| NM_020601    | Tbl1x         | 0.443543 | 1 | 0.665533 | 11.4742  | 17.3396 | No change |
| NM_010271    | Gpd1          | 0.443742 | 1 | 0.640498 | 12.1869  | 18.096  | No change |
| NM_146145    | Jak1          | 0.443792 | 1 | 0.552581 | 21.6352  | 30.2121 | No change |
| NM_080556    | Tm9sf2        | 0.443907 | 1 | 0.567772 | 28.7239  | 40.5378 | No change |
| NM_007644    | Scarb2        | 0.444224 | 1 | 0.626409 | 18.86    | 27.7297 | No change |
| NM_009081    | Rpl28         | 0.444239 | 1 | 0.653374 | 60.2788  | 90.3177 | No change |
| NR_030700    | 4831440E17Rik | 0.444286 | 1 | 0.89008  | 1.2815   | 2.27177 | No change |
| NM_010602    | Kcnj11        | 0.444323 | 1 | 0.794395 | 3.24413  | 5.36992 | No change |
| NM_029658    | Fam101b       | 0.444337 | 1 | 0.781618 | 3.11643  | 5.11186 | No change |
| NM_001146180 | Mtss1         | 0.444423 | 1 | 0.698817 | 4.02645  | 6.22877 | No change |
| NM_080465    | Kcnn2         | 0.444427 | 1 | 0.862316 | 3.37224  | 5.85977 | No change |
| NM_029687    | Wdr38         | 0.444446 | 1 | 0.629469 | 31.957   | 47.0868 | No change |
| NM_011438    | Sox12         | 0.444794 | 1 | 0.787204 | 2.38857  | 3.93353 | No change |
| NM_009443    | Tgoln1        | 0.444832 | 1 | 0.529022 | 38.4254  | 52.7858 | No change |
| NM_177766    | Slc35e1       | 0.444862 | 1 | 0.615192 | 6.50428  | 9.48838 | No change |



|              |               |          |   |          |          |          |           |
|--------------|---------------|----------|---|----------|----------|----------|-----------|
| NM_172441    | Shroom2       | 0.444897 | 1 | 0.634438 | 4.89171  | 7.23274  | No change |
| NM_029634    | Ip6k2         | 0.444923 | 1 | 0.64484  | 17.8205  | 26.5416  | No change |
| NR_028517    | Scarna10      | 0.445183 | 1 | 0.597291 | 812.757  | 1170.9   | No change |
| NM_030255    | Apobec3       | 0.445293 | 1 | 0.702248 | 8.23912  | 12.7764  | No change |
| NM_080558    | Ssfa2         | 0.4453   | 1 | 0.64299  | 6.59572  | 9.81082  | No change |
| NM_019432    | Tmem37        | 0.445379 | 1 | 0.756785 | 12.7462  | 20.542   | No change |
| NM_010656    | Sspn          | 0.445425 | 1 | 0.709706 | 4.15818  | 6.48203  | No change |
| NM_001113533 | Wtap          | 0.445438 | 1 | 0.660407 | 13.7619  | 20.7217  | No change |
| NM_013834    | Sfrp1         | 0.445794 | 1 | 0.676664 | 5.56332  | 8.47304  | No change |
| NM_016703    | Preb          | 0.445909 | 1 | 0.608362 | 9.18483  | 13.3349  | No change |
| NM_144794    | Tmem63a       | 0.446019 | 1 | 0.959345 | 1.35556  | 2.52676  | No change |
| NM_008925    | PrkcsH        | 0.446111 | 1 | 0.681539 | 11.7028  | 17.8848  | No change |
| NR_028520    | Gm10451       | 0.446213 | 1 | 0.826974 | 9.44328  | 15.9982  | No change |
| NM_026914    | 1500032L24Rik | 0.446223 | 1 | 0.705821 | 32.5234  | 50.5605  | No change |
| NM_028175    | Lrrc8e        | 0.446379 | 1 | 0.878477 | 1.65337  | 2.90644  | No change |
| NM_021381    | Prokr1        | 0.44644  | 1 | 0.74521  | 3.48808  | 5.57548  | No change |
| NM_197991    | 2310044H10Rik | 0.446504 | 1 | 0.60495  | 28.591   | 41.4104  | No change |
| NM_009466    | Ugdh          | 0.446537 | 1 | 0.741886 | 5.93617  | 9.4663   | No change |
| NM_007382    | Acadm         | 0.446789 | 1 | 0.635759 | 19.9824  | 29.5724  | No change |
| NM_001139504 | Dnlz          | 0.446798 | 1 | 0.768943 | 4.12483  | 6.70508  | No change |
| NM_001081454 | Furin         | 0.446862 | 1 | 0.641043 | 8.36449  | 12.4247  | No change |
| NM_007961    | Etv6          | 0.447036 | 1 | 0.68552  | 4.10848  | 6.29631  | No change |
| NM_011293    | Polr2j        | 0.447742 | 1 | 0.835947 | 13.7959  | 23.522   | No change |
| NM_175446    | Zmat1         | 0.447742 | 1 | 0.835947 | 2.30784  | 3.93487  | No change |
| NM_172595    | Arl15         | 0.447782 | 1 | 0.735343 | 4.56187  | 7.24104  | No change |
| NM_001172154 | Dnase111      | 0.447849 | 1 | 0.871494 | 4.43669  | 7.7599   | No change |
| NM_001076791 | Zfp874b       | 0.447882 | 1 | 0.804751 | 2.56822  | 4.28234  | No change |
| NM_009021    | Rai1          | 0.448007 | 1 | 0.683034 | 3.18683  | 4.8753   | No change |
| NM_183025    | A430033K04Rik | 0.448127 | 1 | 0.823075 | 2.77263  | 4.68401  | No change |
| NM_144552    | Stxbp6        | 0.448369 | 1 | 0.755017 | 3.09388  | 4.97972  | No change |
| NM_001122954 | Pla2g5        | 0.448392 | 1 | 0.643474 | 16.1735  | 24.065   | No change |
| NM_016886    | Gria3         | 0.448426 | 1 | 1.11385  | 0.46981  | 0.981733 | No change |
| NM_026362    | 5033414D02Rik | 0.448455 | 1 | 0.758938 | 15.4598  | 24.9523  | No change |
| NM_018819    | Brp44l        | 0.448472 | 1 | 0.65866  | 32.5797  | 48.9952  | No change |
| NM_011288    | Mrpl23        | 0.448657 | 1 | 0.833747 | 14.1302  | 24.0537  | No change |
| NM_026913    | Mitd1         | 0.448695 | 1 | 0.848195 | 6.18107  | 10.6314  | No change |
| NM_016762    | Matn2         | 0.448849 | 1 | 0.705671 | 5.5271   | 8.59124  | No change |
| NM_001177576 | Slc25a22      | 0.448853 | 1 | 0.782938 | 4.37976  | 7.19038  | No change |
| NM_001145859 | Sh3bp2        | 0.449569 | 1 | 0.831616 | 2.74382  | 4.66359  | No change |
| NM_009615    | Adam17        | 0.449846 | 1 | 0.595409 | 14.3021  | 20.5768  | No change |
| NM_025326    | Tmem176a      | 0.450014 | 1 | 0.659916 | 27.8379  | 41.9006  | No change |
| NM_175283    | Srd5a1        | 0.450397 | 1 | 0.757711 | 4.99488  | 8.0546   | No change |
| NM_001005510 | Syne2         | 0.450564 | 1 | 0.506055 | 20.6338  | 27.8959  | No change |
| NM_178647    | Cggbp1        | 0.450572 | 1 | 0.589345 | 16.1004  | 23.0662  | No change |
| NR_028381    | B230206F22Rik | 0.450595 | 1 | 1.02459  | 0.799381 | 1.56287  | No change |
| NR_038060    | 5830428M24Rik | 0.450595 | 1 | 1.02459  | 3.29311  | 6.43834  | No change |
| NM_023184    | Klf15         | 0.45062  | 1 | 0.715181 | 7.9597   | 12.4555  | No change |
| NM_008648    | Mup4          | 0.450995 | 1 | 0.793105 | 12.1067  | 20.0194  | No change |
| NM_177411    | Rab5b         | 0.45109  | 1 | 0.571421 | 29.3167  | 41.4787  | No change |
| NM_172647    | F11r          | 0.451143 | 1 | 0.677523 | 10.1928  | 15.5325  | No change |
| NM_001008501 | Zfp760        | 0.451352 | 1 | 0.775053 | 2.83143  | 4.62232  | No change |
| NM_007665    | Cdh3          | 0.451647 | 1 | 0.700425 | 6.42788  | 9.9543   | No change |
| NM_033564    | Mpv17l        | 0.451709 | 1 | 0.807193 | 3.21377  | 5.36777  | No change |
| NM_001005341 | Ypel2         | 0.451732 | 1 | 0.662059 | 6.01389  | 9.0654   | No change |
| NM_001025392 | Bclaf1        | 0.452293 | 1 | 0.540641 | 32.0225  | 44.3461  | No change |
| NM_019769    | 1500003O03Rik | 0.45238  | 1 | 0.605866 | 21.7891  | 31.5781  | No change |
| NR_002864    | Peg13         | 0.45267  | 1 | 0.645022 | 7.50766  | 11.1827  | No change |
| NM_013493    | Cnbp          | 0.452846 | 1 | 0.533154 | 97.3077  | 134.056  | No change |
| NM_011930    | Cicn7         | 0.452858 | 1 | 0.618056 | 11.9557  | 17.4751  | No change |
| NM_172402    | Slc25a32      | 0.453109 | 1 | 0.73922  | 5.25359  | 8.36139  | No change |
| NM_010928    | Notch2        | 0.453177 | 1 | 0.581426 | 7.77462  | 11.0768  | No change |
| NM_009145    | Nptn          | 0.453346 | 1 | 0.610731 | 25.8371  | 37.5719  | No change |
| NM_019753    | Cdh17         | 0.453974 | 1 | 1.04972  | 0.905887 | 1.80411  | No change |
| NM_173781    | Rab6b         | 0.454029 | 1 | 0.7147   | 3.97488  | 6.21764  | No change |
| NM_001190324 | Chchd7        | 0.454209 | 1 | 0.867694 | 14.6341  | 25.5224  | No change |
| NM_001033285 | Cdc42bpa      | 0.45425  | 1 | 0.587947 | 8.66331  | 12.3992  | No change |
| NM_178883    | Gorab         | 0.454346 | 1 | 0.69579  | 8.80537  | 13.5914  | No change |
| NM_172442    | Dtx4          | 0.45449  | 1 | 0.606209 | 10.0252  | 14.5324  | No change |
| NM_025476    | Fam82b        | 0.454578 | 1 | 0.89973  | 3.19658  | 5.70499  | No change |
| NM_010633    | Uhmk1         | 0.455309 | 1 | 0.72773  | 8.47058  | 13.3721  | No change |
| NM_027864    | Galnt14       | 0.455505 | 1 | 0.830062 | 3.53126  | 5.99471  | No change |
| NM_020007    | Mbnl1         | 0.455719 | 1 | 0.585222 | 14.3383  | 20.4823  | No change |
| NM_027760    | Rassf8        | 0.455787 | 1 | 0.818399 | 5.38884  | 9.07226  | No change |
| NM_133937    | 6720456B07Rik | 0.455844 | 1 | 0.620968 | 44.3616  | 64.9725  | No change |
| NM_015794    | Fbxl17        | 0.45598  | 1 | 0.648057 | 2.09227  | 3.123    | No change |
| NM_026499    | Srsf6         | 0.456435 | 1 | 0.559987 | 35.613   | 49.9864  | No change |

|              |               |          |   |          |          |          |           |
|--------------|---------------|----------|---|----------|----------|----------|-----------|
| NM_001045513 | Raph1         | 0.456589 | 1 | 0.765932 | 5.71652  | 9.27143  | No change |
| NM_181392    | Gtf2h5        | 0.456739 | 1 | 0.712396 | 16.7239  | 26.117   | No change |
| NM_172118    | Myl9          | 0.456909 | 1 | 0.606231 | 55.1494  | 79.9445  | No change |
| NM_008141    | Gnat2         | 0.457282 | 1 | 1.11385  | 1.54112  | 3.21913  | No change |
| NM_026617    | Tmbim4        | 0.457309 | 1 | 0.618199 | 63.3964  | 92.6708  | No change |
| NM_175015    | Atp5g3        | 0.457611 | 1 | 0.603636 | 92.0686  | 133.22   | No change |
| NM_001131021 | D630003M21Rik | 0.457613 | 1 | 0.732074 | 3.73052  | 5.90715  | No change |
| NM_019940    | Zfp111        | 0.458054 | 1 | 0.797732 | 1.50445  | 2.49568  | No change |
| NM_008617    | Mdh2          | 0.458478 | 1 | 0.718065 | 14.7866  | 23.1837  | No change |
| NM_139065    | Rbm47         | 0.458522 | 1 | 0.634047 | 9.13957  | 13.5087  | No change |
| NM_027052    | Slc38a4       | 0.45869  | 1 | 0.768719 | 3.31449  | 5.38615  | No change |
| NM_008857    | Prkci         | 0.458702 | 1 | 0.650883 | 7.94484  | 11.8821  | No change |
| NM_153533    | Tenc1         | 0.458959 | 1 | 0.870298 | 1.51024  | 2.63859  | No change |
| NM_026933    | Triap1        | 0.459196 | 1 | 0.848331 | 7.64031  | 13.14    | No change |
| NM_001076789 | Cbx5          | 0.459549 | 1 | 0.527292 | 33.9239  | 46.5446  | No change |
| NR_015529    | R74862        | 0.45973  | 1 | 0.722044 | 9.75188  | 15.3325  | No change |
| NM_133765    | Fbxo31        | 0.459761 | 1 | 1.0383   | 1.83907  | 3.63099  | No change |
| NM_001024626 | Zfp873        | 0.459877 | 1 | 0.902351 | 2.63621  | 4.71323  | No change |
| NM_011897    | Spry2         | 0.460211 | 1 | 0.864241 | 3.53975  | 6.15744  | No change |
| NM_008996    | Rab1          | 0.460301 | 1 | 0.590214 | 29.8759  | 42.826   | No change |
| NM_001112744 | Arhgef16      | 0.460354 | 1 | 0.830548 | 3.28329  | 5.57523  | No change |
| NM_001032298 | Bglap2        | 0.460706 | 1 | 0.988324 | 8.73011  | 16.614   | No change |
| NM_144880    | Ppp2r5a       | 0.46108  | 1 | 0.675049 | 9.20345  | 13.9995  | No change |
| NM_080446    | Helb          | 0.461134 | 1 | 0.828625 | 1.99914  | 3.38995  | No change |
| NM_019883    | Uba52         | 0.461241 | 1 | 0.540066 | 444.398  | 615.164  | No change |
| NM_015817    | Ppap2c        | 0.461278 | 1 | 0.766607 | 8.17177  | 13.2559  | No change |
| NM_001177772 | Slco1c1       | 0.461338 | 1 | 1.58334  | 0.263406 | 0.791397 | No change |
| NM_015804    | Atp11a        | 0.461501 | 1 | 0.553024 | 21.7796  | 30.4217  | No change |
| NM_025572    | 2610528J11Rik | 0.461572 | 1 | 0.886444 | 7.23588  | 12.789   | No change |
| NM_001113545 | Lima1         | 0.46165  | 1 | 0.604077 | 15.4818  | 22.4083  | No change |
| NM_080559    | Sh3bgrl3      | 0.461746 | 1 | 0.605743 | 90.8867  | 131.701  | No change |
| NM_011803    | Klf6          | 0.461871 | 1 | 0.662318 | 7.70143  | 11.6105  | No change |
| NM_010189    | Fcgrt         | 0.461961 | 1 | 0.723723 | 10.7066  | 16.8531  | No change |
| NM_010591    | Jun           | 0.462119 | 1 | 0.775168 | 4.00182  | 6.5326   | No change |
| NM_175465    | Sestd1        | 0.462187 | 1 | 0.631703 | 14.2059  | 20.9622  | No change |
| NM_001168514 | Mapk14        | 0.462223 | 1 | 0.679255 | 7.66176  | 11.6888  | No change |
| NM_001101478 | D3Ert254e     | 0.462362 | 1 | 0.709958 | 3.15591  | 4.91971  | No change |
| NM_029965    | Rnf170        | 0.462393 | 1 | 0.646767 | 9.86204  | 14.7066  | No change |
| NM_011281    | Rorc          | 0.462513 | 1 | 0.806187 | 4.17656  | 6.96972  | No change |
| NM_021523    | Huwe1         | 0.462576 | 1 | 0.544553 | 13.8576  | 19.2424  | No change |
| NM_146211    | Gltd2d1       | 0.462802 | 1 | 0.648632 | 11.9405  | 17.8293  | No change |
| NM_028724    | Rin2          | 0.462833 | 1 | 0.685901 | 5.58202  | 8.55572  | No change |
| NM_145977    | Slc45a3       | 0.462841 | 1 | 0.65751  | 10.3287  | 15.5189  | No change |
| NM_001033136 | Fam82a2       | 0.462916 | 1 | 0.670781 | 13.3692  | 20.2749  | No change |
| NM_172471    | Itih5         | 0.463004 | 1 | 0.651693 | 4.64151  | 6.94547  | No change |
| NM_001081230 | Mtap9         | 0.46348  | 1 | 0.778916 | 2.01749  | 3.30206  | No change |
| NM_023912    | Scyl1         | 0.463507 | 1 | 0.588821 | 32.3754  | 46.3633  | No change |
| NM_178764    | Fam168a       | 0.463999 | 1 | 0.668444 | 4.7323   | 7.16492  | No change |
| NM_001145880 | Zfp790        | 0.464024 | 1 | 0.7325   | 3.97572  | 6.29689  | No change |
| NM_206534    | Churc1        | 0.464273 | 1 | 0.760218 | 22.4675  | 36.2887  | No change |
| NM_011547    | Tcfap2a       | 0.464362 | 1 | 0.946398 | 1.75267  | 3.23473  | No change |
| NM_008907    | Ppia          | 0.46465  | 1 | 0.529668 | 440.126  | 604.858  | No change |
| NM_177602    | Wdr25         | 0.464812 | 1 | 0.756092 | 5.58698  | 8.99751  | No change |
| NM_025514    | Anapc16       | 0.464942 | 1 | 0.690869 | 19.0358  | 29.2782  | No change |
| NM_007513    | Slc7a1        | 0.46524  | 1 | 0.581109 | 13.9502  | 19.8703  | No change |
| NM_008971    | Twf1          | 0.465347 | 1 | 0.621568 | 18.2613  | 26.7556  | No change |
| NM_008760    | Ogn           | 0.465568 | 1 | 0.644182 | 16.216   | 24.1376  | No change |
| NM_001190371 | Ankrd29       | 0.465692 | 1 | 0.896624 | 1.96921  | 3.50576  | No change |
| NM_001166474 | Vmac          | 0.465922 | 1 | 0.67142  | 15.4951  | 23.509   | No change |
| NM_023324    | Peli1         | 0.466216 | 1 | 0.666536 | 9.31906  | 14.0904  | No change |
| NM_019787    | Sec23b        | 0.466432 | 1 | 0.640115 | 15.8531  | 23.5303  | No change |
| NR_027665    | Plcx1         | 0.466842 | 1 | 0.839416 | 2.64657  | 4.5221   | No change |
| NM_022887    | Tsc1          | 0.467016 | 1 | 0.595055 | 10.6029  | 15.2499  | No change |
| NM_010586    | Itpr2         | 0.467029 | 1 | 0.575602 | 13.8844  | 19.7007  | No change |
| NM_001025575 | Cfhr2         | 0.467084 | 1 | 0.855787 | 5.00293  | 8.64897  | No change |
| NM_134158    | AF251705      | 0.467135 | 1 | 1.37019  | 1.04019  | 2.64725  | No change |
| NM_011768    | Zfx           | 0.467219 | 1 | 0.630039 | 7.18639  | 10.5916  | No change |
| NM_001081216 | Phip          | 0.467233 | 1 | 0.565054 | 13.1734  | 18.555   | No change |
| NM_001162492 | Mpst          | 0.467235 | 1 | 0.815049 | 7.6968   | 12.9245  | No change |
| NM_001177374 | Ubr2          | 0.467416 | 1 | 0.611289 | 8.40069  | 12.2201  | No change |
| NM_027230    | Zmynd8        | 0.467606 | 1 | 0.623971 | 10.2735  | 15.0773  | No change |
| NM_026776    | Vps25         | 0.467712 | 1 | 0.687532 | 25.0816  | 38.4859  | No change |
| NM_175009    | Eny2          | 0.467828 | 1 | 0.733671 | 7.40254  | 11.7336  | No change |
| NM_199449    | Zhx2          | 0.467857 | 1 | 0.696113 | 5.65638  | 8.73178  | No change |
| NM_027379    | Far1          | 0.467931 | 1 | 0.596274 | 20.9205  | 30.1148  | No change |
| NM_001161430 | Nxt2          | 0.467942 | 1 | 0.790878 | 4.87025  | 8.03871  | No change |

|              |               |          |   |          |          |          |           |
|--------------|---------------|----------|---|----------|----------|----------|-----------|
| NM_030557    | Mynn          | 0.467967 | 1 | 0.659707 | 8.55643  | 12.8754  | No change |
| NM_011313    | S100a6        | 0.468635 | 1 | 0.822089 | 13.6672  | 23.065   | No change |
| NM_001110497 | Tmem87a       | 0.468662 | 1 | 0.617639 | 20.4713  | 29.9109  | No change |
| NM_009946    | Cplx2         | 0.469428 | 1 | 1.00889  | 0.792448 | 1.53057  | No change |
| NM_009533    | Xrcc5         | 0.469793 | 1 | 0.801911 | 4.38989  | 7.30268  | No change |
| NM_007509    | Atp6v1b2      | 0.469924 | 1 | 0.63202  | 18.3322  | 27.0558  | No change |
| NM_028128    | Rfc5          | 0.470054 | 1 | 0.818848 | 5.84132  | 9.83495  | No change |
| NM_001114361 | Eml4          | 0.470348 | 1 | 0.619627 | 10.9347  | 15.999   | No change |
| NM_007705    | Cirbp         | 0.470401 | 1 | 0.629001 | 41.838   | 61.6168  | No change |
| NM_011067    | Per3          | 0.470503 | 1 | 0.665333 | 5.77165  | 8.71911  | No change |
| NM_153557    | BC029214      | 0.470697 | 1 | 0.728033 | 19.7285  | 31.1462  | No change |
| NM_172146    | Ppat          | 0.470754 | 1 | 0.654262 | 9.70276  | 14.5445  | No change |
| NM_153599    | Cdk8          | 0.470773 | 1 | 0.709138 | 8.73183  | 13.6031  | No change |
| NM_001162521 | Dguok         | 0.470982 | 1 | 0.786909 | 12.3515  | 20.3289  | No change |
| NM_007920    | Elf1          | 0.471043 | 1 | 0.675943 | 7.33784  | 11.1679  | No change |
| NM_145151    | Crebzf        | 0.471076 | 1 | 0.632173 | 10.3008  | 15.2042  | No change |
| NM_009818    | Ctnna1        | 0.471114 | 1 | 0.60862  | 19.1675  | 27.8297  | No change |
| NM_010318    | Gng5          | 0.471233 | 1 | 0.591513 | 173.125  | 248.383  | No change |
| NM_001164042 | Smad5         | 0.471369 | 1 | 0.60589  | 11.1479  | 16.1551  | No change |
| NM_007656    | Cd82          | 0.471455 | 1 | 0.6128   | 36.63    | 53.3395  | No change |
| NM_010810    | Mmp7          | 0.471621 | 1 | 0.806596 | 12.5416  | 20.9322  | No change |
| NM_001161746 | Tnfrsf12a     | 0.472014 | 1 | 0.976351 | 5.26749  | 9.93387  | No change |
| NM_007808    | Cyca          | 0.472228 | 1 | 0.598596 | 27.3623  | 39.451   | No change |
| NM_001198949 | Ralbp1        | 0.47239  | 1 | 0.60912  | 18.8979  | 27.4478  | No change |
| NM_011342    | Sec22b        | 0.472484 | 1 | 0.64933  | 23.1158  | 34.5309  | No change |
| NM_024218    | Rpl24         | 0.472514 | 1 | 0.691362 | 39.7219  | 61.1122  | No change |
| NM_001033472 | A830080D01Rik | 0.472656 | 1 | 0.835668 | 2.75376  | 4.69222  | No change |
| NM_144872    | Eml3          | 0.472656 | 1 | 0.835668 | 2.91483  | 4.96667  | No change |
| NM_198037    | Cachd1        | 0.472656 | 1 | 0.835668 | 1.8669   | 3.18107  | No change |
| NR_036572    | Gm13253       | 0.472989 | 1 | 0.700156 | 35.7964  | 55.414   | No change |
| NM_001017427 | Rasef         | 0.472993 | 1 | 0.591848 | 18.3006  | 26.2619  | No change |
| NM_019727    | Snx1          | 0.473255 | 1 | 0.544393 | 129.53   | 179.84   | No change |
| NM_026693    | Gabarapl2     | 0.473614 | 1 | 0.734007 | 29.7578  | 47.1769  | No change |
| NM_026917    | Zdhhc3        | 0.473631 | 1 | 0.661343 | 5.30652  | 7.9939   | No change |
| NM_009712    | Arsb          | 0.473952 | 1 | 0.777988 | 3.38943  | 5.54315  | No change |
| NM_029850    | Bcl7a         | 0.473952 | 1 | 0.777988 | 3.5496   | 5.8051   | No change |
| NM_008280    | Lipc          | 0.474393 | 1 | 0.736153 | 9.65538  | 15.3304  | No change |
| NM_001163742 | Nlr1          | 0.474445 | 1 | 0.801613 | 3.22797  | 5.3683   | No change |
| NR_002899    | Snora70       | 0.474632 | 1 | 1.29828  | 11.3454  | 27.2694  | No change |
| NM_001164185 | Lsr           | 0.474654 | 1 | 0.677475 | 16.0015  | 24.3791  | No change |
| NM_133749    | 2900064A13Rik | 0.47471  | 1 | 0.679277 | 28.9304  | 44.1327  | No change |
| NM_028230    | Shmt2         | 0.474724 | 1 | 0.696271 | 11.5238  | 17.7903  | No change |
| NM_008160    | Gpx1          | 0.474768 | 1 | 0.650151 | 40.8154  | 61.0052  | No change |
| NR_015608    | 1810058I24Rik | 0.474846 | 1 | 0.793975 | 11.7385  | 19.416   | No change |
| NM_009950    | Cradd         | 0.475006 | 1 | 0.914246 | 3.71696  | 6.70049  | No change |
| NM_027905    | 1300018J18Rik | 0.475123 | 1 | 0.674155 | 13.9091  | 21.1418  | No change |
| NM_146168    | Vopp1         | 0.475201 | 1 | 0.738346 | 6.35109  | 10.0995  | No change |
| NM_016662    | Mxd3          | 0.475378 | 1 | 0.776438 | 10.6229  | 17.3536  | No change |
| NM_178690    | Rab3gap1      | 0.475442 | 1 | 0.656948 | 9.34485  | 14.0339  | No change |
| NM_001033284 | BC026585      | 0.475566 | 1 | 1.15567  | 1.78423  | 3.84296  | No change |
| NM_010509    | Ifnar2        | 0.475791 | 1 | 0.826573 | 3.27294  | 5.54052  | No change |
| NM_134005    | Enpp3         | 0.475918 | 1 | 1.78371  | 0.247577 | 0.867102 | No change |
| NM_001037745 | Zfp791        | 0.476042 | 1 | 1.01076  | 1.70347  | 3.29401  | No change |
| NM_021518    | Rab2a         | 0.476341 | 1 | 0.604579 | 39.4373  | 57.0977  | No change |
| NM_001199272 | Gopc          | 0.476513 | 1 | 0.584901 | 26.492   | 37.8329  | No change |
| NM_010156    | Samd9l        | 0.476541 | 1 | 0.622002 | 11.7572  | 17.2304  | No change |
| NM_016862    | Vti1a         | 0.47656  | 1 | 0.755243 | 4.769    | 7.67457  | No change |
| NM_001001892 | H2-K1         | 0.476647 | 1 | 0.54001  | 206.581  | 285.943  | No change |
| NM_133950    | Kdelr1        | 0.476659 | 1 | 0.672858 | 22.1646  | 33.6594  | No change |
| NM_010741    | Ly6c1         | 0.477247 | 1 | 0.754774 | 19.4511  | 31.2913  | No change |
| NM_019951    | Sec11a        | 0.477661 | 1 | 0.637332 | 46.462   | 68.8239  | No change |
| NM_172702    | Serinc2       | 0.477802 | 1 | 0.700099 | 13.894   | 21.5067  | No change |
| NM_009662    | Alox5         | 0.478127 | 1 | 0.832284 | 3.45137  | 5.86619  | No change |
| NM_008587    | Mertk         | 0.478271 | 1 | 0.768993 | 4.1757   | 6.78531  | No change |
| NM_001039644 | Edem3         | 0.478563 | 1 | 0.628088 | 8.95962  | 13.1863  | No change |
| NM_007687    | Cfl1          | 0.478703 | 1 | 0.574339 | 124.553  | 176.567  | No change |
| NM_019817    | Copz1         | 0.478753 | 1 | 0.636348 | 31.9147  | 47.2423  | No change |
| NM_001081383 | Mll3          | 0.478846 | 1 | 0.552686 | 14.8211  | 20.6965  | No change |
| NM_018882    | Gpr56         | 0.478929 | 1 | 0.638257 | 14.6051  | 21.6484  | No change |
| NM_025934    | Riok2         | 0.478951 | 1 | 0.788085 | 4.0765   | 6.71426  | No change |
| NM_172729    | Nod1          | 0.478988 | 1 | 0.844248 | 2.1124   | 3.62111  | No change |
| NM_021287    | Spnb3         | 0.479093 | 1 | 0.744505 | 2.18346  | 3.48711  | No change |
| NM_145531    | Spg11         | 0.47918  | 1 | 0.608014 | 10.4744  | 15.2011  | No change |
| NM_001013025 | Tgfbra1       | 0.479351 | 1 | 0.696374 | 4.94571  | 7.63541  | No change |
| NM_009870    | Cdk4          | 0.479983 | 1 | 0.70136  | 19.5202  | 30.2418  | No change |
| NM_173739    | Galntf4       | 0.480178 | 1 | 0.741253 | 7.22641  | 11.5144  | No change |

|              |               |          |   |          |          |         |           |
|--------------|---------------|----------|---|----------|----------|---------|-----------|
| NM_027215    | Tmem147       | 0.480237 | 1 | 0.647833 | 53.8755  | 80.3927 | No change |
| NM_011480    | Srebf1        | 0.480243 | 1 | 0.584653 | 28.678   | 40.9471 | No change |
| NR_027885    | Vaultrc5      | 0.480338 | 1 | 0.936212 | 16.3627  | 29.9649 | No change |
| NM_008173    | Nr3c1         | 0.480507 | 1 | 0.632091 | 9.08464  | 13.4076 | No change |
| NM_001163572 | Tmem170b      | 0.480744 | 1 | 0.667247 | 5.2294   | 7.91002 | No change |
| NM_029398    | Tmem14a       | 0.480888 | 1 | 1.21007  | 1.75486  | 3.93817 | No change |
| NM_028444    | Prkcdbp       | 0.480911 | 1 | 0.889149 | 6.99646  | 12.385  | No change |
| NM_031997    | Tmem2         | 0.48093  | 1 | 0.755554 | 2.50882  | 4.03804 | No change |
| NM_177025    | Cobll1        | 0.481014 | 1 | 0.661606 | 7.94793  | 11.9747 | No change |
| NM_009610    | Actg2         | 0.481091 | 1 | 0.534957 | 358.481  | 494.457 | No change |
| NM_177130    | Glit28d2      | 0.481226 | 1 | 1.04277  | 1.29863  | 2.57052 | No change |
| NM_133656    | Crk           | 0.481247 | 1 | 0.611037 | 21.8441  | 31.7682 | No change |
| NM_010017    | Dag1          | 0.481591 | 1 | 0.602087 | 20.8368  | 30.1148 | No change |
| NR_030711    | 2210403K04Rik | 0.481626 | 1 | 0.822251 | 5.99849  | 10.1223 | No change |
| NM_007862    | Dlg1          | 0.481753 | 1 | 0.658932 | 8.94151  | 13.4464 | No change |
| NM_001190357 | Carkd         | 0.481768 | 1 | 0.700053 | 20.7051  | 32.0476 | No change |
| NM_026840    | Pdgfrl        | 0.481878 | 1 | 1.17994  | 1.40932  | 3.09081 | No change |
| NM_025418    | Vta1          | 0.481972 | 1 | 0.705284 | 19.4614  | 30.2335 | No change |
| NM_028780    | Tm9sf1        | 0.482077 | 1 | 0.637818 | 21.6059  | 32.0149 | No change |
| NR_028574    | Shhg8         | 0.482103 | 1 | 0.795885 | 16.0693  | 26.613  | No change |
| NM_009524    | Wnt5a         | 0.482209 | 1 | 0.832673 | 2.33234  | 3.96505 | No change |
| NM_026246    | Mrpl49        | 0.482259 | 1 | 0.71579  | 13.6391  | 21.3455 | No change |
| NM_018773    | Skap2         | 0.482333 | 1 | 0.665691 | 23.6845  | 35.786  | No change |
| NM_009163    | Sgpl1         | 0.482601 | 1 | 0.613902 | 18.7121  | 27.2677 | No change |
| NM_183150    | BC003965      | 0.482732 | 1 | 0.794864 | 4.21892  | 6.98199 | No change |
| NM_001190408 | Gas2l1        | 0.482844 | 1 | 0.617076 | 28.5132  | 41.6421 | No change |
| NM_176996    | Smo           | 0.482858 | 1 | 0.782882 | 3.48728  | 5.72234 | No change |
| NM_001160404 | Galnt1        | 0.482931 | 1 | 0.624763 | 16.9436  | 24.8784 | No change |
| NM_021284    | Kras          | 0.483043 | 1 | 0.659333 | 9.01382  | 13.5588 | No change |
| NM_030729    | Nckipsd       | 0.483091 | 1 | 0.867836 | 2.84114  | 4.95283 | No change |
| NM_181404    | Kank1         | 0.483167 | 1 | 0.64157  | 9.70033  | 14.4113 | No change |
| NM_009670    | Ank3          | 0.483417 | 1 | 0.715593 | 3.41161  | 5.33846 | No change |
| NM_177298    | Pisd          | 0.483546 | 1 | 0.620974 | 32.6746  | 47.8495 | No change |
| NM_025811    | Nhlrc2        | 0.483792 | 1 | 0.744733 | 4.73005  | 7.55502 | No change |
| NM_008149    | Gpam          | 0.483889 | 1 | 0.632449 | 15.639   | 23.0864 | No change |
| NM_018831    | Dclre1a       | 0.484158 | 1 | 0.741886 | 4.66777  | 7.44057 | No change |
| NM_183170    | Mpv17l2       | 0.484247 | 1 | 0.860098 | 8.97616  | 15.561  | No change |
| NM_027879    | Cdc40         | 0.484639 | 1 | 0.720447 | 10.9831  | 17.2449 | No change |
| NM_018880    | Trim3         | 0.484652 | 1 | 0.857674 | 2.94809  | 5.1019  | No change |
| NR_001460    | Rmrp          | 0.484852 | 1 | 0.523693 | 3310.54  | 4530.66 | No change |
| NM_026077    | 3110040N11Rik | 0.484884 | 1 | 0.923524 | 7.15633  | 12.9844 | No change |
| NM_029920    | Mtus2         | 0.485015 | 1 | 0.744068 | 2.50388  | 3.99738 | No change |
| NM_008654    | Ppp1r15a      | 0.485198 | 1 | 0.790987 | 5.70813  | 9.42026 | No change |
| NM_145562    | Parm1         | 0.48522  | 1 | 0.933283 | 2.80777  | 5.13039 | No change |
| NM_013502    | Ctbp1         | 0.485832 | 1 | 0.643063 | 23.2614  | 34.5939 | No change |
| NM_013901    | Slc39a1       | 0.48616  | 1 | 0.645111 | 22.2102  | 33.0778 | No change |
| NM_008069    | Gabrb1        | 0.486162 | 1 | 1.06805  | 1.76106  | 3.55095 | No change |
| NM_008439    | Khk           | 0.486211 | 1 | 0.949625 | 4.86665  | 8.99797 | No change |
| NM_001166501 | Dennd1b       | 0.48639  | 1 | 0.66932  | 4.74812  | 7.19222 | No change |
| NR_024619    | 2610001J05Rik | 0.486689 | 1 | 0.801911 | 6.91904  | 11.5073 | No change |
| NM_027271    | D3Erd751e     | 0.486757 | 1 | 0.711969 | 7.61545  | 11.8859 | No change |
| NM_146201    | Zfp553        | 0.486792 | 1 | 0.846571 | 3.56249  | 6.11623 | No change |
| NM_008551    | Mapkapk2      | 0.486846 | 1 | 0.642381 | 21.2038  | 31.5187 | No change |
| NM_001110794 | Anxa7         | 0.486852 | 1 | 0.632965 | 21.7149  | 32.0666 | No change |
| NM_183195    | Marveld1      | 0.487074 | 1 | 0.870089 | 2.67266  | 4.6663  | No change |
| NM_009955    | Dpysl2        | 0.487156 | 1 | 0.633991 | 13.8222  | 20.4261 | No change |
| NM_015827    | Copb2         | 0.487213 | 1 | 0.612189 | 28.01    | 40.7673 | No change |
| NM_145548    | Cyp2j13       | 0.48727  | 1 | 0.961852 | 1.17908  | 2.19936 | No change |
| NM_001163489 | Sema4a        | 0.487614 | 1 | 0.638243 | 19.082   | 28.2827 | No change |
| NM_028705    | Herc3         | 0.487726 | 1 | 0.740111 | 4.21488  | 6.71    | No change |
| NM_001081473 | Zxdb          | 0.487808 | 1 | 0.760546 | 3.01181  | 4.86437 | No change |
| NM_008434    | Kcnq1         | 0.488077 | 1 | 0.862316 | 2.85306  | 4.95355 | No change |
| NM_011056    | Pde4d         | 0.488077 | 1 | 0.862316 | 1.22598  | 2.12857 | No change |
| NM_001001881 | 2510009E07Rik | 0.488097 | 1 | 0.699981 | 5.56032  | 8.60546 | No change |
| NM_021446    | 0610007P14Rik | 0.488286 | 1 | 0.771749 | 13.174   | 21.4464 | No change |
| NM_001130163 | Oxr1          | 0.488321 | 1 | 0.571507 | 46.948   | 66.4213 | No change |
| NM_130863    | Adrbk1        | 0.48848  | 1 | 0.677512 | 11.433   | 17.4175 | No change |
| NM_001128086 | Anks1b        | 0.488707 | 1 | 1.01432  | 0.587916 | 1.13938 | No change |
| NM_029022    | Scrn3         | 0.488707 | 1 | 0.814295 | 3.58445  | 6.0139  | No change |
| NM_010022    | Dbt           | 0.48876  | 1 | 0.785725 | 4.29759  | 7.0657  | No change |
| NM_011563    | Prdx2         | 0.488763 | 1 | 0.65603  | 49.7173  | 74.6108 | No change |
| NM_001190913 | Kirrel3       | 0.489351 | 1 | 0.904627 | 2.19873  | 3.93501 | No change |
| NM_138602    | Praf2         | 0.489397 | 1 | 1.20696  | 1.67587  | 3.75027 | No change |
| NM_001044383 | Ubtf          | 0.489425 | 1 | 0.620478 | 17.384   | 25.4482 | No change |
| NM_025424    | Nenf          | 0.489443 | 1 | 0.766487 | 24.8903  | 40.3688 | No change |
| NR_024068    | Shhg7         | 0.489479 | 1 | 0.897231 | 9.67436  | 17.2221 | No change |

|              |               |          |   |          |          |          |           |
|--------------|---------------|----------|---|----------|----------|----------|-----------|
| NM_018782    | Calcl         | 0.489567 | 1 | 0.759095 | 3.6634   | 5.91059  | No change |
| NM_013471    | Anxa4         | 0.4896   | 1 | 0.662429 | 21.8508  | 32.9385  | No change |
| NM_177712    | Zfp874a       | 0.489705 | 1 | 0.821857 | 3.44163  | 5.80532  | No change |
| NR_004432    | Rnu12         | 0.489885 | 1 | 0.887084 | 50.6435  | 89.4994  | No change |
| NM_001082476 | Ndor1         | 0.48991  | 1 | 0.707401 | 5.72095  | 8.90021  | No change |
| NM_001146324 | Hps3          | 0.490099 | 1 | 0.795679 | 5.70079  | 9.4389   | No change |
| NM_021890    | Fads3         | 0.490117 | 1 | 0.734403 | 6.52372  | 10.3437  | No change |
| NM_018815    | Nup210        | 0.490252 | 1 | 0.64207  | 8.12341  | 12.0723  | No change |
| NM_181414    | Pik3c3        | 0.490259 | 1 | 0.778568 | 4.85289  | 7.9382   | No change |
| NM_001123037 | Eif4a2        | 0.490414 | 1 | 0.578364 | 78.5538  | 111.668  | No change |
| NM_001039581 | Abca3         | 0.491033 | 1 | 0.65873  | 7.297    | 10.9712  | No change |
| NM_009159    | Srsf5         | 0.491125 | 1 | 0.591592 | 87.2649  | 125.198  | No change |
| NM_080455    | Tshz2         | 0.491174 | 1 | 0.63983  | 11.6677  | 17.3124  | No change |
| NM_013812    | Cdk2ap1       | 0.491211 | 1 | 0.682666 | 28.3232  | 43.3043  | No change |
| NM_029418    | 9130401M01Rik | 0.491221 | 1 | 0.817613 | 8.85159  | 14.8855  | No change |
| NM_138656    | Mvd           | 0.491395 | 1 | 0.828453 | 6.13425  | 10.3956  | No change |
| NM_207515    | Mbnl2         | 0.491749 | 1 | 0.628287 | 15.7851  | 23.2335  | No change |
| NM_153388    | Lrfr4         | 0.491956 | 1 | 0.957736 | 1.83842  | 3.41862  | No change |
| NM_009483    | Kdm6a         | 0.492158 | 1 | 0.717196 | 4.80504  | 7.5268   | No change |
| NR_002901    | Snora68       | 0.492279 | 1 | 1.03442  | 39.1134  | 76.9189  | No change |
| NM_010568    | Insr          | 0.492428 | 1 | 0.617609 | 9.06641  | 13.2455  | No change |
| NM_013820    | Hk2           | 0.492459 | 1 | 0.60366  | 19.6015  | 28.3595  | No change |
| NM_007635    | Ccng2         | 0.49251  | 1 | 0.735576 | 8.63477  | 13.7019  | No change |
| NM_016907    | Spint1        | 0.492629 | 1 | 0.731305 | 9.83792  | 15.5642  | No change |
| NM_144523    | Zfp622        | 0.492815 | 1 | 0.823853 | 4.00305  | 6.76162  | No change |
| NM_011072    | Pfn1          | 0.493026 | 1 | 0.614265 | 104.059  | 151.666  | No change |
| NM_007901    | S1pr1         | 0.493044 | 1 | 1.069    | 1.10441  | 2.22791  | No change |
| NM_017401    | Polm          | 0.493232 | 1 | 1.00694  | 1.47725  | 2.84709  | No change |
| NM_144832    | BC017643      | 0.493289 | 1 | 0.742174 | 8.63816  | 13.771   | No change |
| NM_001172121 | Rbms3         | 0.493673 | 1 | 0.7169   | 3.47288  | 5.43886  | No change |
| NM_009127    | Scd1          | 0.493714 | 1 | 0.578214 | 39.0321  | 55.4796  | No change |
| NM_001017429 | Cox17         | 0.493739 | 1 | 0.903088 | 16.3043  | 29.1445  | No change |
| NM_030718    | Abo           | 0.493758 | 1 | 0.899455 | 4.07424  | 7.26384  | No change |
| NM_133662    | Ier3          | 0.493758 | 1 | 0.899455 | 6.6496   | 11.8554  | No change |
| NM_025836    | Plin3         | 0.493841 | 1 | 0.637691 | 29.5364  | 43.7596  | No change |
| NM_010120    | Eif1a         | 0.494037 | 1 | 0.610126 | 34.3502  | 49.922   | No change |
| NM_080575    | Acss1         | 0.494078 | 1 | 0.673726 | 11.2277  | 17.0588  | No change |
| NM_019699    | Fads2         | 0.494168 | 1 | 0.580437 | 120.022  | 170.861  | No change |
| NM_153083    | Thtpa         | 0.494466 | 1 | 0.746609 | 7.02085  | 11.2276  | No change |
| NM_172448    | Rnf43         | 0.495154 | 1 | 0.716613 | 6.06236  | 9.4922   | No change |
| NM_001081361 | Mosc1         | 0.495271 | 1 | 2.02075  | 0.225752 | 0.963414 | No change |
| NM_172682    | Fam160a1      | 0.495588 | 1 | 0.757493 | 4.19301  | 6.75699  | No change |
| NM_207245    | Zfp870        | 0.495825 | 1 | 0.864179 | 1.68442  | 2.92803  | No change |
| NM_027862    | Atp5h         | 0.495836 | 1 | 0.695711 | 56.3371  | 86.9246  | No change |
| NM_021028    | Tk2           | 0.495972 | 1 | 0.713539 | 11.2961  | 17.6486  | No change |
| NM_010513    | Igf1r         | 0.496147 | 1 | 0.595669 | 11.2935  | 16.2486  | No change |
| NM_019920    | Lamtor3       | 0.496505 | 1 | 0.837471 | 8.33225  | 14.2104  | No change |
| NM_001081171 | Lama5         | 0.49659  | 1 | 0.675574 | 3.56788  | 5.42782  | No change |
| NM_001164082 | Polr3d        | 0.496633 | 1 | 0.763358 | 8.7764   | 14.2016  | No change |
| NM_009082    | Rpl29         | 0.496658 | 1 | 0.58888  | 222.428  | 318.509  | No change |
| NM_175352    | Unc119b       | 0.4968   | 1 | 0.642623 | 17.0071  | 25.2835  | No change |
| NM_133772    | Ssbp4         | 0.496972 | 1 | 0.7902   | 9.82789  | 16.2077  | No change |
| NM_027244    | Ndufa11       | 0.497061 | 1 | 0.784462 | 5.68334  | 9.33471  | No change |
| NM_001013441 | Ric8b         | 0.497185 | 1 | 0.803213 | 4.55196  | 7.57643  | No change |
| NM_028787    | Slc35f5       | 0.497214 | 1 | 0.8215   | 4.50844  | 7.60205  | No change |
| NM_009565    | Zbtb7b        | 0.497315 | 1 | 0.7502   | 5.3639   | 8.59935  | No change |
| NM_013769    | Tjp3          | 0.497503 | 1 | 0.795493 | 4.62167  | 7.65044  | No change |
| NM_001083934 | Myom1         | 0.497632 | 1 | 0.85082  | 1.83437  | 3.15832  | No change |
| NM_173751    | Ilvbl         | 0.497658 | 1 | 0.820124 | 5.08708  | 8.5693   | No change |
| NM_028410    | Prkrr         | 0.497758 | 1 | 0.666396 | 13.2662  | 20.0525  | No change |
| NM_172120    | Vps41         | 0.497847 | 1 | 0.725734 | 7.69522  | 12.1261  | No change |
| NM_178928    | Afap1l1       | 0.497982 | 1 | 0.788536 | 4.34173  | 7.15167  | No change |
| NM_145570    | Fam176a       | 0.498034 | 1 | 1.17614  | 1.30083  | 2.8424   | No change |
| NM_013909    | Fbxl6         | 0.498035 | 1 | 0.891462 | 4.51337  | 8.00004  | No change |
| NM_001109992 | Ptpn11        | 0.498318 | 1 | 0.616729 | 16.9409  | 24.7338  | No change |
| NM_016863    | Fkbp1b        | 0.49838  | 1 | 1.23724  | 1.92011  | 4.39537  | No change |
| NM_001177854 | Asph          | 0.498527 | 1 | 0.707905 | 11.6478  | 18.1259  | No change |
| NM_022883    | Lpin3         | 0.498638 | 1 | 0.876604 | 2.42812  | 4.25826  | No change |
| NM_011845    | Mid2          | 0.498875 | 1 | 0.768563 | 2.92154  | 4.74481  | No change |
| NM_024257    | Hdhd3         | 0.499035 | 1 | 0.930143 | 5.85601  | 10.6725  | No change |
| NM_025654    | Rdm1          | 0.499035 | 1 | 0.930143 | 5.77601  | 10.5267  | No change |
| NM_008993    | Pxmp2         | 0.499216 | 1 | 0.868742 | 8.68597  | 15.1473  | No change |
| NM_019929    | Sumo3         | 0.499363 | 1 | 0.659581 | 20.4634  | 30.784   | No change |
| NM_007801    | Ctsh          | 0.499389 | 1 | 0.730709 | 14.6858  | 23.2226  | No change |
| NM_025301    | Mrpl17        | 0.499516 | 1 | 0.717243 | 4.02873  | 6.31059  | No change |
| NM_145573    | Mrps35        | 0.500175 | 1 | 0.859282 | 8.81776  | 15.2732  | No change |

|              |               |          |   |          |          |         |           |
|--------------|---------------|----------|---|----------|----------|---------|-----------|
| NM_030226    | 9130019O22Rik | 0.500752 | 1 | 0.811292 | 3.30673  | 5.5352  | No change |
| NM_029862    | 5930434B04Rik | 0.500779 | 1 | 0.802926 | 8.45157  | 14.0635 | No change |
| NM_001160222 | Pum2          | 0.500918 | 1 | 0.621384 | 15.573   | 22.8104 | No change |
| NM_011906    | Tpra1         | 0.501002 | 1 | 0.852851 | 5.37272  | 9.26335 | No change |
| NM_015800    | Crim1         | 0.501021 | 1 | 0.712757 | 4.77795  | 7.46051 | No change |
| NM_026353    | Slc48a1       | 0.501115 | 1 | 0.661969 | 20.0305  | 30.1829 | No change |
| NR_034048    | Snora81       | 0.501295 | 1 | 0.85082  | 60.7688  | 104.622 | No change |
| NM_053185    | Col4a6        | 0.501361 | 1 | 0.765932 | 2.70469  | 4.38435 | No change |
| NM_024198    | Gpx7          | 0.501861 | 1 | 0.994015 | 3.90372  | 7.45112 | No change |
| NM_145628    | Usp11         | 0.501919 | 1 | 0.829682 | 3.29955  | 5.59572 | No change |
| NR_027886    | A930013F10Rik | 0.502087 | 1 | 0.887346 | 3.33377  | 5.8913  | No change |
| NM_008483    | Lamb2         | 0.502181 | 1 | 0.659641 | 9.39318  | 14.131  | No change |
| NM_022410    | Myh9          | 0.502462 | 1 | 0.582464 | 28.5447  | 40.6923 | No change |
| NM_015792    | Fbxo18        | 0.502647 | 1 | 0.647316 | 17.8893  | 26.6816 | No change |
| NM_001113375 | Mocs2         | 0.502943 | 1 | 0.805733 | 8.09122  | 13.4903 | No change |
| NM_173182    | Fndc3b        | 0.503024 | 1 | 0.622086 | 13.6243  | 19.9657 | No change |
| NM_175184    | Fam125b       | 0.503047 | 1 | 0.798042 | 2.86027  | 4.74295 | No change |
| NR_002863    | Emx2os        | 0.503212 | 1 | 1.00196  | 0.915734 | 1.75797 | No change |
| NM_138742    | Nap1l3        | 0.503294 | 1 | 1.05836  | 1.28284  | 2.56669 | No change |
| NM_001013786 | Zfp187        | 0.503619 | 1 | 0.632322 | 20.0171  | 29.5441 | No change |
| NM_053075    | Rheb          | 0.503746 | 1 | 0.696885 | 22.7728  | 35.1639 | No change |
| NM_175403    | Mlec          | 0.503866 | 1 | 0.560006 | 72.3626  | 101.559 | No change |
| NM_134127    | Cyp4f15       | 0.50444  | 1 | 0.941902 | 2.87528  | 5.28419 | No change |
| NM_019963    | Stat2         | 0.504842 | 1 | 0.765932 | 4.20315  | 6.81312 | No change |
| NM_172827    | Lnpep         | 0.504962 | 1 | 0.639885 | 13.9897  | 20.7572 | No change |
| NM_010914    | Nfyb          | 0.504985 | 1 | 0.755913 | 7.86503  | 12.6591 | No change |
| NM_011699    | Lin7c         | 0.505253 | 1 | 0.617134 | 25.6967  | 37.5271 | No change |
| NM_176832    | Spire1        | 0.505357 | 1 | 0.662844 | 11.0812  | 16.7075 | No change |
| NM_018753    | Ywhab         | 0.505364 | 1 | 0.650687 | 22.4273  | 33.5283 | No change |
| NM_144900    | Atp1a1        | 0.505702 | 1 | 0.577744 | 71.2595  | 101.251 | No change |
| NM_001109991 | Col18a1       | 0.506177 | 1 | 0.6729   | 8.33393  | 12.654  | No change |
| NM_178410    | Marveld2      | 0.506243 | 1 | 0.875406 | 4.0177   | 7.03897 | No change |
| NM_001031811 | Kcnh8         | 0.506377 | 1 | 1.23315  | 0.935476 | 2.13377 | No change |
| NM_001037719 | Btla          | 0.506377 | 1 | 1.23315  | 0.603216 | 1.3759  | No change |
| NM_053177    | Mcoln1        | 0.506467 | 1 | 0.913261 | 3.5856   | 6.45473 | No change |
| NM_145413    | Fam20b        | 0.506595 | 1 | 0.592141 | 43.2826  | 62.1183 | No change |
| NM_011965    | Psma1         | 0.506669 | 1 | 0.656794 | 46.3694  | 69.6172 | No change |
| NM_133806    | Uap1          | 0.506719 | 1 | 0.681426 | 18.6519  | 28.49   | No change |
| NM_199308    | Mast3         | 0.50728  | 1 | 0.743702 | 4.25945  | 6.79686 | No change |
| NM_025348    | Ndufa3        | 0.507323 | 1 | 0.779307 | 48.5255  | 79.402  | No change |
| NM_001166385 | Sp4           | 0.507351 | 1 | 0.741378 | 4.02633  | 6.41436 | No change |
| NM_010117    | Rhbdf1        | 0.50772  | 1 | 0.810305 | 4.60035  | 7.69451 | No change |
| NM_001081345 | Chd2          | 0.508113 | 1 | 0.610241 | 14.0984  | 20.4902 | No change |
| NM_027420    | 2610034B18Rik | 0.508528 | 1 | 0.848921 | 4.81851  | 8.28357 | No change |
| NM_001005509 | Eif2a         | 0.509103 | 1 | 0.827551 | 5.27472  | 8.93093 | No change |
| NM_029745    | Tbc1d9b       | 0.509199 | 1 | 0.675254 | 9.09038  | 13.8251 | No change |
| NM_001164352 | Efemp2        | 0.509756 | 1 | 0.897721 | 4.42125  | 7.87024 | No change |
| NM_009047    | Rem1          | 0.510047 | 1 | 0.804072 | 8.95617  | 14.9135 | No change |
| NM_009272    | Srm           | 0.510262 | 1 | 0.954377 | 4.46077  | 8.2711  | No change |
| NM_011655    | Tubb5         | 0.510332 | 1 | 0.610878 | 49.8785  | 72.5238 | No change |
| NM_011883    | Rnf13         | 0.51046  | 1 | 1.03857  | 3.62203  | 7.1405  | No change |
| NM_019411    | Ppp2ca        | 0.510478 | 1 | 0.652401 | 33.7993  | 50.5885 | No change |
| NM_001111025 | Pigx          | 0.510656 | 1 | 0.860874 | 10.0573  | 17.437  | No change |
| NM_021355    | Fmod          | 0.510787 | 1 | 0.783706 | 5.87478  | 9.64244 | No change |
| NM_027984    | Epn3          | 0.510833 | 1 | 0.858758 | 2.58388  | 4.47307 | No change |
| NM_023196    | Pla2g12a      | 0.511094 | 1 | 0.701638 | 23.0652  | 35.7324 | No change |
| NM_011895    | Slc35a1       | 0.511171 | 1 | 0.756007 | 10.3907  | 16.7242 | No change |
| NM_030601    | Cla2          | 0.511948 | 1 | 0.750321 | 6.10338  | 9.78432 | No change |
| NM_023645    | Kdelc1        | 0.512364 | 1 | 0.936317 | 2.81891  | 5.15882 | No change |
| NM_001039677 | Slc30a2       | 0.512788 | 1 | 0.841942 | 7.68045  | 13.1373 | No change |
| NM_010227    | Flna          | 0.512971 | 1 | 0.565207 | 59.5233  | 83.8407 | No change |
| NM_133991    | Ftsj1         | 0.513175 | 1 | 0.775376 | 5.33126  | 8.69876 | No change |
| NM_024461    | 1810037117Rik | 0.513235 | 1 | 0.736125 | 26.2777  | 41.7064 | No change |
| NM_027739    | B4galnt1      | 0.513322 | 1 | 0.713317 | 14.1348  | 22.0774 | No change |
| NM_201601    | Fgfr2         | 0.513345 | 1 | 0.692192 | 8.33847  | 12.8325 | No change |
| NM_178119    | Agap1         | 0.513392 | 1 | 0.673072 | 5.33917  | 8.10749 | No change |
| NM_012037    | Vat1          | 0.513862 | 1 | 0.654047 | 24.464   | 36.6575 | No change |
| NM_009988    | Cxadr         | 0.51388  | 1 | 0.862793 | 5.75077  | 9.98363 | No change |
| NM_008909    | Ppl           | 0.514005 | 1 | 0.728638 | 4.41896  | 6.97666 | No change |
| NM_001005859 | Rpl34         | 0.514018 | 1 | 0.860668 | 25.0756  | 43.4665 | No change |
| NM_001199350 | Rpl34-ps1     | 0.514018 | 1 | 0.860668 | 24.4685  | 42.414  | No change |
| NM_026850    | Pdcl3         | 0.514049 | 1 | 0.909924 | 4.45283  | 7.99548 | No change |
| NM_016847    | Avpr1a        | 0.514051 | 1 | 1.22933  | 0.756681 | 1.72019 | No change |
| NM_001077237 | BC003331      | 0.514164 | 1 | 0.686513 | 13.8899  | 21.2908 | No change |
| NM_011692    | Vbp1          | 0.5142   | 1 | 0.809414 | 8.8803   | 14.8425 | No change |
| NM_001199967 | Gm11127       | 0.51429  | 1 | 0.913556 | 5.54847  | 9.98877 | No change |

|              |               |          |   |          |         |         |           |
|--------------|---------------|----------|---|----------|---------|---------|-----------|
| NM_011544    | Tcf12         | 0.51442  | 1 | 0.653958 | 14.3324 | 21.4748 | No change |
| NM_198168    | Ppp2r5b       | 0.514443 | 1 | 0.750969 | 8.36418 | 13.4144 | No change |
| NM_001111282 | Hmg1l1        | 0.51449  | 1 | 0.782556 | 13.6013 | 22.3051 | No change |
| NM_030561    | BC004004      | 0.51453  | 1 | 0.719482 | 10.867  | 17.0468 | No change |
| NM_133688    | Lyrn5         | 0.514688 | 1 | 0.741409 | 17.8506 | 28.4367 | No change |
| NM_010459    | Hoxb4         | 0.514877 | 1 | 0.781913 | 6.84436 | 11.2191 | No change |
| NM_001164659 | Trank1        | 0.515051 | 1 | 0.57622  | 34.3099 | 48.6978 | No change |
| NM_028295    | Pdia5         | 0.515237 | 1 | 0.733286 | 14.8324 | 23.4938 | No change |
| NM_001010930 | Mrps33        | 0.515337 | 1 | 0.815415 | 14.684  | 24.647  | No change |
| NR_003513    | Neat1         | 0.515472 | 1 | 0.577773 | 109.464 | 155.536 | No change |
| NM_013759    | Sepr1         | 0.515478 | 1 | 0.845467 | 12.6643 | 21.7156 | No change |
| NM_033074    | Tars          | 0.515844 | 1 | 0.696288 | 15.0702 | 23.2585 | No change |
| NM_007952    | Pdia3         | 0.515876 | 1 | 0.608935 | 58.35   | 84.7253 | No change |
| NM_026609    | Leprotl1      | 0.515929 | 1 | 0.747351 | 9.16658 | 14.6637 | No change |
| NM_027251    | 2010107G23Rik | 0.516186 | 1 | 1.03985  | 2.37544 | 4.68653 | No change |
| NM_001033872 | Smagp         | 0.516263 | 1 | 0.803515 | 15.7795 | 26.2632 | No change |
| NM_010880    | Ncl           | 0.516347 | 1 | 0.616803 | 15.9778 | 23.3275 | No change |
| NM_001163243 | Fis1          | 0.516484 | 1 | 0.72461  | 31.1051 | 48.969  | No change |
| NM_175666    | Hist2h2bb     | 0.516634 | 1 | 0.821828 | 26.8593 | 45.288  | No change |
| NM_001042779 | Sema3b        | 0.516692 | 1 | 0.746797 | 7.25397 | 11.5995 | No change |
| NM_033073    | Krt7          | 0.516693 | 1 | 0.878751 | 5.80042 | 10.1847 | No change |
| NM_181325    | Slc25a15      | 0.51679  | 1 | 0.889538 | 2.50128 | 4.4259  | No change |
| NM_182996    | Zfp692        | 0.51693  | 1 | 0.820606 | 6.86559 | 11.5661 | No change |
| NM_021455    | Mixipl        | 0.516966 | 1 | 0.895431 | 2.64072 | 4.69237 | No change |
| NM_198004    | 5133401N09Rik | 0.517056 | 1 | 0.864683 | 6.64182 | 11.5455 | No change |
| NM_001205391 | Atg16l1       | 0.51707  | 1 | 0.770096 | 6.18032 | 10.0462 | No change |
| NM_030035    | Golgb1        | 0.517195 | 1 | 0.57874  | 32.3148 | 45.9462 | No change |
| NM_011122    | Plod1         | 0.517275 | 1 | 0.809    | 4.47904 | 7.48375 | No change |
| NM_013835    | Trove2        | 0.517328 | 1 | 0.698817 | 4.49967 | 6.95681 | No change |
| NM_172563    | Hlf           | 0.517348 | 1 | 0.832878 | 2.17752 | 3.70043 | No change |
| NM_013589    | Ltbp2         | 0.517378 | 1 | 0.713799 | 5.04517 | 7.88255 | No change |
| NM_001011732 | Xkr7          | 0.517468 | 1 | 1.02222  | 1.64528 | 3.20424 | No change |
| NM_153153    | Svil          | 0.51753  | 1 | 0.665029 | 8.10143 | 12.2327 | No change |
| NM_133869    | Cept1         | 0.517707 | 1 | 0.727229 | 10.5055 | 16.5691 | No change |
| NM_021297    | Tlr4          | 0.517899 | 1 | 0.911896 | 1.9933  | 3.58395 | No change |
| NM_026176    | Pdcl          | 0.518087 | 1 | 0.711392 | 12.0463 | 18.7892 | No change |
| NM_013778    | Akr1c13       | 0.518554 | 1 | 0.952919 | 5.03464 | 9.3235  | No change |
| NM_001190448 | Ddc           | 0.518629 | 1 | 1.05029  | 1.96853 | 3.91328 | No change |
| NM_008453    | Kif3          | 0.518958 | 1 | 0.784837 | 7.64996 | 12.565  | No change |
| NM_026618    | Ccdc56        | 0.518973 | 1 | 0.723795 | 42.5146 | 66.8916 | No change |
| NM_008640    | Laptn4a       | 0.519062 | 1 | 0.615692 | 67.0087 | 97.7558 | No change |
| NM_029878    | Tbcd          | 0.519185 | 1 | 0.823513 | 3.4027  | 5.74401 | No change |
| NM_029657    | Mgrn1         | 0.519245 | 1 | 0.714628 | 10.7271 | 16.7695 | No change |
| NM_001199494 | Ei24          | 0.519796 | 1 | 0.701378 | 17.5954 | 27.2522 | No change |
| NM_025371    | Acy1          | 0.520131 | 1 | 0.868742 | 6.96442 | 12.1408 | No change |
| NM_009657    | Aldoc         | 0.520288 | 1 | 0.787627 | 10.2779 | 16.9143 | No change |
| NM_001159331 | N6amt1        | 0.520826 | 1 | 0.940207 | 4.05732 | 7.44467 | No change |
| NM_022314    | Tpm3          | 0.520866 | 1 | 0.6493   | 42.1768 | 62.9879 | No change |
| NM_010344    | Gsr           | 0.520878 | 1 | 0.77682  | 7.17274 | 11.7144 | No change |
| NM_009256    | Serpnb9       | 0.521207 | 1 | 0.709872 | 10.6478 | 16.5899 | No change |
| NM_025760    | Ptplad2       | 0.521393 | 1 | 0.910321 | 3.76989 | 6.77014 | No change |
| NM_018730    | Rpl36         | 0.521394 | 1 | 0.67059  | 144.18  | 218.548 | No change |
| NM_007537    | Bcl2l2        | 0.521551 | 1 | 0.681043 | 14.7803 | 22.5682 | No change |
| NM_026559    | Txndc17       | 0.521922 | 1 | 0.775203 | 13.5434 | 22.0933 | No change |
| NM_028036    | Tmco6         | 0.521948 | 1 | 1.13053  | 1.61273 | 3.40167 | No change |
| NM_011175    | Lgmn          | 0.522239 | 1 | 0.650866 | 42.4331 | 63.4399 | No change |
| NM_001122830 | Kihl26        | 0.522386 | 1 | 0.802128 | 5.50589 | 9.15422 | No change |
| NM_001034963 | Sorbs1        | 0.52279  | 1 | 0.673532 | 10.8108 | 16.4206 | No change |
| NM_133753    | Errfi1        | 0.522809 | 1 | 0.685761 | 16.2109 | 24.8343 | No change |
| NM_138756    | Slc25a36      | 0.522828 | 1 | 0.661498 | 22.2671 | 33.5384 | No change |
| NM_030708    | Zfx4          | 0.522998 | 1 | 0.800415 | 1.1654  | 1.93526 | No change |
| NM_173444    | Nbeal1        | 0.523068 | 1 | 0.64774  | 6.99922 | 10.4414 | No change |
| NM_172803    | Dock4         | 0.523286 | 1 | 0.868379 | 1.26165 | 2.19868 | No change |
| NM_175236    | Adhfe1        | 0.523594 | 1 | 0.89053  | 2.84189 | 5.03154 | No change |
| NM_025901    | Polr3k        | 0.52393  | 1 | 0.75876  | 7.8497  | 12.6574 | No change |
| NM_198866    | Dbpht2        | 0.524059 | 1 | 0.899261 | 2.83891 | 5.05773 | No change |
| NM_001033375 | A230046K03Rik | 0.524149 | 1 | 0.724888 | 5.42506 | 8.54188 | No change |
| NM_001160411 | Gstm4         | 0.524204 | 1 | 0.849092 | 7.90234 | 13.5834 | No change |
| NM_023603    | Sfpq          | 0.524399 | 1 | 0.655076 | 22.0588 | 33.0757 | No change |
| NM_033080    | Nudt19        | 0.524583 | 1 | 0.784478 | 9.64533 | 15.8373 | No change |
| NM_008098    | Mtpn          | 0.524708 | 1 | 0.634967 | 26.9323 | 39.8207 | No change |
| NM_009338    | Acat2         | 0.524737 | 1 | 0.607964 | 92.9239 | 134.833 | No change |
| NM_001081133 | Kif16b        | 0.524913 | 1 | 0.631896 | 21.2599 | 31.3665 | No change |
| NM_016891    | Ppp2r1a       | 0.524942 | 1 | 0.699607 | 18.7825 | 29.0537 | No change |
| NM_144784    | Acat1         | 0.525017 | 1 | 0.661948 | 20.724  | 31.2236 | No change |
| NM_007826    | Dach1         | 0.525498 | 1 | 0.83656  | 2.42758 | 4.13571 | No change |

|                |               |          |   |          |          |          |           |
|----------------|---------------|----------|---|----------|----------|----------|-----------|
| NM_001003908   | Cltc          | 0.525594 | 1 | 0.575751 | 87.4338  | 124.057  | No change |
| NM_008908      | Ppic          | 0.526006 | 1 | 1.01656  | 3.68516  | 7.1456   | No change |
| NM_010511      | Ifngr1        | 0.526398 | 1 | 0.722763 | 15.8378  | 24.8994  | No change |
| NM_183142      | Alg11         | 0.526767 | 1 | 0.854335 | 7.58848  | 13.0921  | No change |
| NM_145930      | AW549877      | 0.526796 | 1 | 0.664158 | 13.6535  | 20.6025  | No change |
| NM_173440      | Nrip1         | 0.526875 | 1 | 0.66291  | 15.6344  | 23.571   | No change |
| NM_173378      | Trp53bp2      | 0.52692  | 1 | 0.790533 | 4.11459  | 6.78482  | No change |
| NM_011763      | Zfp9          | 0.526946 | 1 | 0.892387 | 2.29288  | 4.06468  | No change |
| NM_145608      | BC021891      | 0.527176 | 1 | 0.729548 | 5.48532  | 8.66486  | No change |
| NM_029037      | 4930444A02Rik | 0.527472 | 1 | 0.844248 | 3.38691  | 5.80149  | No change |
| NM_010390      | H2-Q1         | 0.527959 | 1 | 0.821247 | 7.09325  | 11.9533  | No change |
| NM_177741      | Ppp1r3b       | 0.528015 | 1 | 0.794055 | 4.17926  | 6.90854  | No change |
| NM_207634      | Rps24         | 0.528191 | 1 | 0.657373 | 94.0064  | 141.18   | No change |
| NM_011797      | Car14         | 0.528343 | 1 | 1.13016  | 1.84418  | 3.88776  | No change |
| NM_031375      | Ngrn          | 0.528359 | 1 | 0.800067 | 12.7674  | 21.1949  | No change |
| NM_008091      | Gata3         | 0.528694 | 1 | 0.914085 | 2.4929   | 4.48833  | No change |
| NM_001033389   | Fubp3         | 0.528783 | 1 | 0.765527 | 6.01894  | 9.75129  | No change |
| NM_173014      | Lpcat2        | 0.529448 | 1 | 1.30289  | 0.597368 | 1.43582  | No change |
| NM_175353      | Exoc6         | 0.529571 | 1 | 0.881194 | 3.57007  | 6.2781   | No change |
| NM_007853      | Degs1         | 0.529692 | 1 | 0.706945 | 20.4734  | 31.8315  | No change |
| NM_001042489   | Hvcn1         | 0.529714 | 1 | 0.711664 | 13.9787  | 21.8057  | No change |
| NM_021296      | Grpel2        | 0.530426 | 1 | 0.782978 | 4.85749  | 7.96692  | No change |
| NM_010738      | Ly6a          | 0.530442 | 1 | 0.701858 | 53.1114  | 82.2822  | No change |
| NM_183319      | Xkrx          | 0.530905 | 1 | 0.819471 | 5.16513  | 8.69285  | No change |
| NM_007868      | Dmd           | 0.531024 | 1 | 0.7494   | 1.92194  | 3.07853  | No change |
| NM_194061      | D630045J12Rik | 0.531033 | 1 | 0.684245 | 5.05067  | 7.72882  | No change |
| NM_001164724   | Ii33          | 0.531057 | 1 | 0.835634 | 5.18265  | 8.82284  | No change |
| NM_007913      | Egr1          | 0.531226 | 1 | 0.978925 | 1.88298  | 3.55216  | No change |
| NM_145612      | Zfp810        | 0.531342 | 1 | 0.791927 | 5.68219  | 9.3785   | No change |
| NM_011204      | Ptpn13        | 0.531676 | 1 | 0.671145 | 8.11205  | 12.3003  | No change |
| NM_013607      | Myh11         | 0.531838 | 1 | 0.610942 | 32.1773  | 46.7854  | No change |
| NM_001164325   | Trpm7         | 0.532316 | 1 | 0.642246 | 15.3008  | 22.7375  | No change |
| NM_178364      | Zfp369        | 0.532386 | 1 | 0.875945 | 3.57088  | 6.25575  | No change |
| NM_019861      | Ctsf          | 0.532414 | 1 | 0.854211 | 5.9636   | 10.287   | No change |
| NM_016677      | Hpcal1        | 0.532635 | 1 | 0.811397 | 10.224   | 17.1084  | No change |
| NM_001113564   | Serbp1        | 0.532662 | 1 | 0.638527 | 17.6976  | 26.2311  | No change |
| NM_023665      | D4Wsu53e      | 0.533078 | 1 | 0.671544 | 48.1694  | 73.0594  | No change |
| NM_011498      | Bhlhe40       | 0.53323  | 1 | 0.697423 | 15.4251  | 23.8227  | No change |
| NM_010726      | Phyh          | 0.53338  | 1 | 0.83862  | 8.9362   | 15.2446  | No change |
| NM_145398      | Casd1         | 0.533438 | 1 | 0.765932 | 6.20934  | 10.0622  | No change |
| NM_007898      | Ebp           | 0.53364  | 1 | 0.735825 | 17.9336  | 28.4525  | No change |
| NM_025783      | Vps24         | 0.533706 | 1 | 0.672436 | 26.1886  | 39.7454  | No change |
| NM_011526      | Tagln         | 0.533837 | 1 | 0.700985 | 29.1779  | 45.1749  | No change |
| NM_008650      | Mut           | 0.53442  | 1 | 0.742488 | 8.00284  | 12.7563  | No change |
| NM_001081079   | Ogfr1         | 0.534614 | 1 | 0.907851 | 1.76966  | 3.17161  | No change |
| NM_019719      | Stub1         | 0.53464  | 1 | 0.674903 | 39.6816  | 60.3267  | No change |
| NM_007923      | Elk4          | 0.534697 | 1 | 0.716835 | 10.5555  | 16.525   | No change |
| NM_178661      | Creb3l2       | 0.534894 | 1 | 0.69745  | 14.7662  | 22.8052  | No change |
| NM_001193309   | Morc4         | 0.535236 | 1 | 0.85082  | 2.98587  | 5.13791  | No change |
| NM_212445      | Kdelc2        | 0.535236 | 1 | 0.85082  | 3.36607  | 5.79214  | No change |
| NM_029057      | Tbc1d30       | 0.5355   | 1 | 0.757399 | 4.51566  | 7.27364  | No change |
| NM_176849      | Arglu1        | 0.53555  | 1 | 0.678684 | 37.1669  | 56.6528  | No change |
| NM_025385      | Prr13         | 0.535605 | 1 | 0.793257 | 15.3109  | 25.2933  | No change |
| NM_183146      | A530054K11Rik | 0.535697 | 1 | 0.773267 | 4.30619  | 7.01414  | No change |
| NM_175364      | Lymr2         | 0.535743 | 1 | 0.754527 | 19.9123  | 32.0091  | No change |
| NM_021462      | Mknk2         | 0.536076 | 1 | 0.651376 | 32.2796  | 48.274   | No change |
| NM_011933      | Decr2         | 0.536089 | 1 | 0.791927 | 9.31051  | 15.3663  | No change |
| NM_028264      | Tmem55a       | 0.536089 | 1 | 0.791927 | 8.37538  | 13.8229  | No change |
| NM_001199307_2 | Gm14435       | 0.536439 | 1 | 0.805733 | 15.2125  | 25.353   | No change |
| NM_175499      | Slitrk6       | 0.536469 | 1 | 1.29606  | 0.410732 | 0.981583 | No change |
| NM_177574      | Vps37d        | 0.536469 | 1 | 1.29606  | 1.35169  | 3.23032  | No change |
| NM_013594      | Mbd1          | 0.536608 | 1 | 0.740919 | 11.4242  | 18.1896  | No change |
| NM_007863      | Mpp3          | 0.536717 | 1 | 0.897776 | 3.23128  | 5.74933  | No change |
| NM_021554      | Mettl9        | 0.536742 | 1 | 0.735654 | 17.7004  | 28.0784  | No change |
| NM_145445      | Eif2b2        | 0.536976 | 1 | 0.82856  | 9.2156   | 15.6087  | No change |
| NM_028464      | Mocs1         | 0.536987 | 1 | 0.900611 | 3.42666  | 6.10929  | No change |
| NM_001025439   | Camk2d        | 0.537017 | 1 | 0.771073 | 5.34977  | 8.70042  | No change |
| NM_001033441   | Alg10b        | 0.537044 | 1 | 0.742473 | 8.09687  | 12.9058  | No change |
| NM_010736      | Ltbr          | 0.537118 | 1 | 0.748511 | 13.5921  | 21.7569  | No change |
| NM_001168253   | Fam83h        | 0.53755  | 1 | 0.760546 | 5.60924  | 9.055    | No change |
| NM_001111059   | Cd34          | 0.537723 | 1 | 0.716095 | 15.4223  | 24.1312  | No change |
| NM_027078      | Ikbip         | 0.537758 | 1 | 0.864827 | 9.19834  | 15.9858  | No change |
| NM_027462      | Wars2         | 0.537821 | 1 | 0.932408 | 1.73121  | 3.15762  | No change |
| NM_020276      | Nelf          | 0.53789  | 1 | 0.682139 | 21.852   | 33.3888  | No change |
| NM_181070      | Rab18         | 0.538008 | 1 | 0.723815 | 16.4583  | 25.8918  | No change |
| NM_176999      | Atp10b        | 0.538091 | 1 | 0.645312 | 16.6161  | 24.7444  | No change |



|              |               |          |   |          |           |          |           |
|--------------|---------------|----------|---|----------|-----------|----------|-----------|
| NM_145828    | Xylt2         | 0.538096 | 1 | 0.844668 | 3.80624   | 6.52073  | No change |
| NM_021053    | Slc46a2       | 0.538158 | 1 | 0.877155 | 5.10856   | 8.95645  | No change |
| NM_030678    | Gys1          | 0.538158 | 1 | 0.877155 | 2.85891   | 5.0123   | No change |
| NM_001039115 | Zkscan4       | 0.5383   | 1 | 1.25136  | 0.842825  | 1.94596  | No change |
| NM_024254    | 2410042D21Rik | 0.538345 | 1 | 0.840371 | 4.66553   | 7.96847  | No change |
| NM_178406    | Gpr153        | 0.538439 | 1 | 0.838995 | 3.59813   | 6.13937  | No change |
| NM_007437    | Aldh3a2       | 0.53847  | 1 | 0.646559 | 36.0596   | 53.7458  | No change |
| NM_145384    | Pqlc2         | 0.538557 | 1 | 0.884032 | 4.93673   | 8.69768  | No change |
| NM_023523    | Pecr          | 0.538722 | 1 | 1.01293  | 4.29332   | 8.29988  | No change |
| NM_010023    | Eci1          | 0.538758 | 1 | 0.916091 | 7.66558   | 13.8186  | No change |
| NM_172308    | Mthfd11       | 0.539287 | 1 | 0.755781 | 7.24762   | 11.6605  | No change |
| NM_153582    | Cmtm4         | 0.539456 | 1 | 0.812901 | 12.7788   | 21.4046  | No change |
| NM_023628    | Anxa9         | 0.539487 | 1 | 0.795202 | 10.3054   | 17.047   | No change |
| NM_018798    | Ubqln2        | 0.539521 | 1 | 0.788814 | 6.05388   | 9.96917  | No change |
| NM_010431    | Hif1a         | 0.539525 | 1 | 0.687989 | 12.384    | 18.9995  | No change |
| NM_181419    | Zfp599        | 0.539862 | 1 | 1.14702  | 0.818999  | 1.74757  | No change |
| NM_010176    | Fah           | 0.540205 | 1 | 0.8222   | 9.81157   | 16.5427  | No change |
| NM_030026    | Mccc2         | 0.540271 | 1 | 0.743805 | 14.4701   | 23.0853  | No change |
| NM_028130    | Zfp157        | 0.540338 | 1 | 0.857401 | 2.28631   | 3.95229  | No change |
| NM_146230    | Acaa1b        | 0.540596 | 1 | 0.870401 | 6.68117   | 11.6569  | No change |
| NM_019478    | Pqbp1         | 0.540724 | 1 | 0.841915 | 12.7672   | 21.8288  | No change |
| NM_008070    | Gabrb2        | 0.540732 | 1 | 2.36178  | 0.0276852 | 0.171112 | No change |
| NR_029744    | Mir29a        | 0.540732 | 1 | 2.36178  | 2.3759    | 14.6845  | No change |
| NM_016802    | Rhoa          | 0.540783 | 1 | 0.667345 | 38.4524   | 58.1487  | No change |
| NM_027121    | Vkorc11l      | 0.540797 | 1 | 0.840531 | 12.273    | 20.9632  | No change |
| NM_177086    | Zmat4         | 0.540802 | 1 | 0.9303   | 1.86782   | 3.40144  | No change |
| NM_016697    | Gpc3          | 0.540823 | 1 | 0.818116 | 7.09835   | 11.9335  | No change |
| NM_001042613 | Sepp1         | 0.541684 | 1 | 0.637538 | 71.5625   | 105.992  | No change |
| NM_028099    | Dusp11        | 0.54189  | 1 | 0.66744  | 12.9117   | 19.5266  | No change |
| NM_011825    | Grem2         | 0.541964 | 1 | 1.21622  | 0.614117  | 1.38023  | No change |
| NM_009752    | Glb1          | 0.54204  | 1 | 0.752788 | 12.1437   | 19.4961  | No change |
| NM_001081264 | Alg6          | 0.542082 | 1 | 0.938128 | 2.4171    | 4.42642  | No change |
| NM_001122820 | Ap3m2         | 0.542532 | 1 | 0.76278  | 7.51807   | 12.155   | No change |
| NM_010498    | Ids           | 0.542841 | 1 | 0.759495 | 5.42461   | 8.75007  | No change |
| NM_145836    | 6430527G18Rik | 0.542879 | 1 | 0.85729  | 2.99991   | 5.18529  | No change |
| NM_008064    | Gaa           | 0.542883 | 1 | 0.7178   | 11.1887   | 17.5272  | No change |
| NM_026213    | Ttc33         | 0.542955 | 1 | 0.791309 | 11.0944   | 18.3012  | No change |
| NM_009775    | Tspo          | 0.543131 | 1 | 0.924699 | 9.52579   | 17.2768  | No change |
| NM_010301    | Gna11         | 0.543187 | 1 | 0.678839 | 21.7283   | 33.1224  | No change |
| NM_001033337 | Ttc38         | 0.543209 | 1 | 0.784906 | 5.72259   | 9.39733  | No change |
| NM_012053    | Rpl8          | 0.544145 | 1 | 0.626725 | 226.057   | 332.304  | No change |
| NM_001001493 | BC056474      | 0.544202 | 1 | 0.885036 | 14.8559   | 26.1898  | No change |
| NM_009542    | Zfp101        | 0.544268 | 1 | 1.00138  | 2.01602   | 3.86425  | No change |
| NM_011743    | Zfp106        | 0.544281 | 1 | 0.619517 | 25.8658   | 37.8325  | No change |
| NM_145571    | Mobkl1b       | 0.544311 | 1 | 0.735775 | 22.3089   | 35.3899  | No change |
| NM_148948    | Dicer1        | 0.544496 | 1 | 0.6665   | 8.93535   | 13.5041  | No change |
| NM_146231    | Zfp825        | 0.544574 | 1 | 1.08738  | 2.7212    | 5.55433  | No change |
| NM_172661    | Prrc2b        | 0.544745 | 1 | 0.670297 | 9.71265   | 14.7177  | No change |
| NM_172787    | L3mbtl3       | 0.544827 | 1 | 0.786098 | 6.31343   | 10.3761  | No change |
| NM_144908    | Galnt11       | 0.545032 | 1 | 0.798353 | 7.65224   | 12.6856  | No change |
| NM_009760    | Bnip3         | 0.545274 | 1 | 0.741707 | 18.8123   | 29.9674  | No change |
| NM_176837    | Arhgap18      | 0.545516 | 1 | 0.761553 | 7.49739   | 12.1108  | No change |
| NM_007404    | Adam9         | 0.545616 | 1 | 0.693188 | 14.9529   | 23.0236  | No change |
| NM_133206    | Znrf1         | 0.545968 | 1 | 0.689735 | 11.3022   | 17.3605  | No change |
| NM_010890    | Nedd4         | 0.546126 | 1 | 0.627922 | 36.1404   | 53.1703  | No change |
| NM_011018    | Sqstm1        | 0.546442 | 1 | 0.634741 | 84.9905   | 125.634  | No change |
| NM_009938    | Copa          | 0.546589 | 1 | 0.644764 | 29.5996   | 44.061   | No change |
| NM_023913    | Ern1          | 0.546593 | 1 | 0.682569 | 17.7212   | 27.0841  | No change |
| NM_019819    | Dusp14        | 0.546629 | 1 | 1.18786  | 1.787     | 3.93034  | No change |
| NM_026210    | Fam18b        | 0.546841 | 1 | 0.709799 | 27.7895   | 43.2881  | No change |
| NM_145469    | Nipal2        | 0.547538 | 1 | 0.817462 | 4.44577   | 7.47001  | No change |
| NM_139061    | Vps54         | 0.547664 | 1 | 0.729623 | 8.20874   | 12.9656  | No change |
| NM_001110211 | Anxa6         | 0.547674 | 1 | 0.682399 | 27.1599   | 41.5046  | No change |
| NM_134032    | Hoxb2         | 0.547692 | 1 | 0.914755 | 5.4334    | 9.78367  | No change |
| NM_008139    | Gnaq          | 0.547792 | 1 | 0.730869 | 6.77879   | 10.7164  | No change |
| NM_026313    | Luc7l3        | 0.548232 | 1 | 0.656962 | 33.7469   | 50.6632  | No change |
| NM_011716    | Wfs1          | 0.548305 | 1 | 0.777702 | 6.70726   | 10.958   | No change |
| NM_009077    | Rpl18         | 0.548535 | 1 | 0.696552 | 87.1418   | 134.489  | No change |
| NM_001081642 | Xlr4a         | 0.548598 | 1 | 0.737587 | 30.0189   | 47.6798  | No change |
| NM_001177556 | Gng12         | 0.548691 | 1 | 0.703132 | 12.9283   | 20.0446  | No change |
| NM_001024622 | Pcnp          | 0.54881  | 1 | 0.681885 | 32.4068   | 49.5045  | No change |
| NM_001130408 | Arf1          | 0.548823 | 1 | 0.624963 | 115.233   | 169.183  | No change |
| NM_029436    | Kihl24        | 0.548898 | 1 | 0.658123 | 16.4873   | 24.7718  | No change |
| NM_007392    | Acta2         | 0.548959 | 1 | 0.634137 | 102.66    | 151.689  | No change |
| NM_172468    | Snx30         | 0.549148 | 1 | 0.751981 | 4.11269   | 6.59861  | No change |
| NM_010684    | Lamp1         | 0.549666 | 1 | 0.605397 | 191.215   | 276.944  | No change |

|              |               |          |   |          |          |          |           |
|--------------|---------------|----------|---|----------|----------|----------|-----------|
| NM_001105245 | Pcdh19        | 0.549764 | 1 | 1.28378  | 0.182797 | 0.432392 | No change |
| NM_009450    | Tubb2a        | 0.54983  | 1 | 0.758399 | 18.128   | 29.2167  | No change |
| NM_010466    | Hoxc8         | 0.549842 | 1 | 1.02334  | 2.14757  | 4.182    | No change |
| NM_194334    | Tbc1d2b       | 0.550046 | 1 | 0.760804 | 4.80357  | 7.75497  | No change |
| NM_008514    | Lrp6          | 0.550506 | 1 | 0.667396 | 10.2389  | 15.4834  | No change |
| NM_010680    | Lama3         | 0.550601 | 1 | 0.867215 | 1.17256  | 2.04086  | No change |
| NM_001161770 | Lmo4          | 0.55084  | 1 | 0.870928 | 7.64868  | 13.3478  | No change |
| NM_019992    | Stap1         | 0.550994 | 1 | 0.898126 | 8.77297  | 15.6095  | No change |
| NM_145070    | Hip1r         | 0.551316 | 1 | 0.676237 | 19.0577  | 28.9975  | No change |
| NM_148933    | Slco4a1       | 0.551338 | 1 | 0.900746 | 3.18325  | 5.67444  | No change |
| NM_025442    | Alg5          | 0.551354 | 1 | 0.919586 | 5.96962  | 10.7857  | No change |
| NM_172758    | Slc38a7       | 0.551669 | 1 | 0.88097  | 3.39758  | 5.97164  | No change |
| NM_009142    | Cx3cl1        | 0.551805 | 1 | 0.795493 | 6.69655  | 11.0781  | No change |
| NM_175122    | Rab39b        | 0.551813 | 1 | 1.16448  | 0.849914 | 1.83641  | No change |
| NM_009806    | Cask          | 0.551921 | 1 | 0.815589 | 2.1605   | 3.62519  | No change |
| NM_011528    | Taldo1        | 0.551965 | 1 | 0.79488  | 16.604   | 27.4561  | No change |
| NM_008422    | Kcnc3         | 0.552022 | 1 | 1.03139  | 0.978679 | 1.91689  | No change |
| NM_025549    | Arrdc4        | 0.552022 | 1 | 1.03139  | 4.51066  | 8.83481  | No change |
| NM_016775    | Dnajc5        | 0.552023 | 1 | 0.681837 | 21.0558  | 32.1633  | No change |
| NM_020486    | Bcam          | 0.552104 | 1 | 0.739767 | 15.0562  | 23.9502  | No change |
| NM_031402    | Crispld1      | 0.552221 | 1 | 0.971836 | 1.65273  | 3.10031  | No change |
| NR_024329    | 2900097C17Rik | 0.55235  | 1 | 0.622192 | 55.5191  | 81.3543  | No change |
| NM_001177965 | Naa10         | 0.552351 | 1 | 0.853792 | 12.7374  | 21.9588  | No change |
| NM_175141    | 1810030O07Rik | 0.552382 | 1 | 0.812199 | 7.15355  | 11.9745  | No change |
| NM_027106    | Avpi1         | 0.552449 | 1 | 0.856882 | 13.4959  | 23.3174  | No change |
| NM_134188    | Acot2         | 0.552484 | 1 | 0.926228 | 3.86831  | 7.02232  | No change |
| NM_001081237 | Klhdc5        | 0.55263  | 1 | 0.748263 | 5.05913  | 8.09574  | No change |
| NM_178403    | Pus7          | 0.552748 | 1 | 0.809783 | 5.68664  | 9.5027   | No change |
| NM_025392    | Bccip         | 0.552756 | 1 | 0.863448 | 10.1402  | 17.6015  | No change |
| NM_133976    | Imp3          | 0.552848 | 1 | 0.780514 | 26.9779  | 44.1606  | No change |
| NM_145624    | Zfp709        | 0.553041 | 1 | 0.824348 | 4.22541  | 7.13395  | No change |
| NM_001170953 | Rnmt          | 0.553382 | 1 | 0.779171 | 5.09422  | 8.3309   | No change |
| NM_145615    | Etfa          | 0.553473 | 1 | 0.819569 | 11.9487  | 20.1054  | No change |
| NM_024469    | Bhlhe41       | 0.553862 | 1 | 0.816001 | 12.7027  | 21.32    | No change |
| NM_001008700 | Il4ra         | 0.55391  | 1 | 0.712455 | 10.0695  | 15.714   | No change |
| NM_016920    | Atp6v0a1      | 0.553946 | 1 | 0.74156  | 9.06008  | 14.43    | No change |
| NM_133955    | Rhou          | 0.554207 | 1 | 0.755155 | 9.33517  | 15.0106  | No change |
| NM_001162494 | Fzd6          | 0.554414 | 1 | 0.714759 | 12.2787  | 19.1923  | No change |
| NM_007620    | Cbr1          | 0.554474 | 1 | 0.768917 | 25.4015  | 41.2416  | No change |
| NM_145451    | Gpx6          | 0.554785 | 1 | 0.791367 | 17.727   | 29.2397  | No change |
| NM_023173    | Dusp12        | 0.554811 | 1 | 0.968314 | 4.97082  | 9.30043  | No change |
| NM_177420    | Psat1         | 0.554986 | 1 | 0.730737 | 19.0918  | 30.1773  | No change |
| NM_027908    | Amdhd1        | 0.555327 | 1 | 1.50617  | 0.431803 | 1.21579  | No change |
| NM_178603    | Mrpl50        | 0.55533  | 1 | 0.805733 | 9.44483  | 15.7373  | No change |
| NM_028626    | Mcee          | 0.555491 | 1 | 0.91064  | 13.6182  | 24.4461  | No change |
| NM_016769    | Smad3         | 0.555523 | 1 | 0.741886 | 7.21575  | 11.495   | No change |
| NM_001164598 | Irf2bp2       | 0.55578  | 1 | 0.738487 | 8.44623  | 13.4232  | No change |
| NM_013464    | Ahr           | 0.55598  | 1 | 0.896263 | 1.89011  | 3.35826  | No change |
| NM_033474    | Arvcf         | 0.556188 | 1 | 0.781279 | 5.36795  | 8.79137  | No change |
| NM_027307    | Golm1         | 0.556245 | 1 | 0.732538 | 11.1531  | 17.6513  | No change |
| NM_025813    | Mfsd1         | 0.556355 | 1 | 0.811467 | 6.41231  | 10.7277  | No change |
| NM_207215    | Mycbp2        | 0.556361 | 1 | 0.598613 | 49.3839  | 71.1877  | No change |
| NM_013680    | Syn1          | 0.556501 | 1 | 1.03255  | 1.56175  | 3.06112  | No change |
| NM_053015    | Mlph          | 0.556523 | 1 | 0.844063 | 3.31057  | 5.66771  | No change |
| NM_138584    | Spg21         | 0.556565 | 1 | 0.809912 | 7.20247  | 12.0363  | No change |
| NM_013477    | Atp6v0d1      | 0.556727 | 1 | 0.702092 | 37.885   | 58.6937  | No change |
| NM_177429    | Ofd1          | 0.556862 | 1 | 0.771234 | 6.16641  | 10.0278  | No change |
| NM_178027    | Vps26b        | 0.556888 | 1 | 0.690927 | 10.5254  | 16.1799  | No change |
| NM_001163675 | Abcc4         | 0.557317 | 1 | 0.723908 | 8.10298  | 12.7466  | No change |
| NM_026345    | Mansc1        | 0.557426 | 1 | 1.1285   | 1.40794  | 2.96108  | No change |
| NM_181278    | B230219D22Rik | 0.557482 | 1 | 0.699337 | 13.8427  | 21.4046  | No change |
| NR_003965    | Gm10653       | 0.557495 | 1 | 0.766562 | 23.4761  | 38.0515  | No change |
| NM_023053    | Twsg1         | 0.557554 | 1 | 0.694918 | 16.997   | 26.201   | No change |
| NM_024479    | Wbscr27       | 0.557772 | 1 | 0.787187 | 8.50338  | 13.9843  | No change |
| NM_172733    | Dera          | 0.557952 | 1 | 0.909384 | 5.73893  | 10.2923  | No change |
| NM_009805    | Cflar         | 0.557985 | 1 | 0.871741 | 6.11281  | 10.6726  | No change |
| NM_010387    | H2-DMb1       | 0.557985 | 1 | 0.871741 | 9.6072   | 16.7736  | No change |
| NM_198012    | Trim68        | 0.557986 | 1 | 0.813484 | 7.96407  | 13.3425  | No change |
| NM_011385    | Ski           | 0.558285 | 1 | 0.71156  | 10.049   | 15.6718  | No change |
| NM_001111022 | Runx1         | 0.558631 | 1 | 0.832442 | 2.94442  | 4.99941  | No change |
| NM_025409    | Ier3ip1       | 0.558645 | 1 | 0.790316 | 16.7483  | 27.604   | No change |
| NM_011268    | Rgs9          | 0.558926 | 1 | 0.789272 | 9.50358  | 15.6519  | No change |
| NM_028101    | Jmjd8         | 0.558971 | 1 | 0.696853 | 32.6144  | 50.3429  | No change |
| NM_172666    | Agps          | 0.559041 | 1 | 0.760935 | 4.22381  | 6.81912  | No change |
| NM_001004293 | Amigo1        | 0.559099 | 1 | 0.900311 | 2.06456  | 3.67864  | No change |
| NM_027324    | Sfxn1         | 0.559132 | 1 | 0.82156  | 6.39885  | 10.7814  | No change |

|              |               |          |   |          |          |          |           |
|--------------|---------------|----------|---|----------|----------|----------|-----------|
| NR_026976    | 6720401G13Rik | 0.559271 | 1 | 0.676726 | 19.4402  | 29.5887  | No change |
| NM_001111050 | Cd151         | 0.5595   | 1 | 0.687769 | 47.6228  | 73.0444  | No change |
| NM_172339    | Snappc4       | 0.559626 | 1 | 0.734266 | 9.59633  | 15.2055  | No change |
| NM_025458    | Tmed6         | 0.559705 | 1 | 0.814698 | 22.1273  | 37.1017  | No change |
| NM_019500    | Cldn14        | 0.559882 | 1 | 0.867876 | 8.79527  | 15.3134  | No change |
| NM_016985    | Mtmr1         | 0.560039 | 1 | 0.771749 | 6.07595  | 9.88404  | No change |
| NM_130882    | Cyp4f13       | 0.560069 | 1 | 0.889959 | 6.47643  | 11.4547  | No change |
| NM_173368    | Chd6          | 0.56032  | 1 | 0.663574 | 11.6738  | 17.6058  | No change |
| NM_021375    | Rhbg          | 0.56045  | 1 | 0.797551 | 11.6276  | 19.2619  | No change |
| NM_175036    | Leprot        | 0.56077  | 1 | 0.755786 | 18.272   | 29.3923  | No change |
| NM_145459    | Zfp503        | 0.561    | 1 | 0.853619 | 3.39118  | 5.84484  | No change |
| NM_019880    | Mtch1         | 0.5611   | 1 | 0.669033 | 58.6467  | 88.7842  | No change |
| NM_008981    | Ptprg         | 0.561135 | 1 | 0.705848 | 6.71904  | 10.4366  | No change |
| NM_172415    | Arhgef10l     | 0.561196 | 1 | 0.73868  | 9.01562  | 14.3295  | No change |
| NM_021899    | Foxj2         | 0.561376 | 1 | 0.859538 | 2.73878  | 4.74024  | No change |
| NR_003292    | Zxda          | 0.56149  | 1 | 0.861089 | 1.94006  | 3.36152  | No change |
| NM_176808    | Mcf2          | 0.561888 | 1 | 0.685419 | 37.527   | 57.4643  | No change |
| NM_001159578 | Lnx1          | 0.562481 | 1 | 0.832898 | 5.44406  | 9.24616  | No change |
| NM_010211    | Fhl1          | 0.562647 | 1 | 0.751085 | 15.2047  | 24.3772  | No change |
| NR_028438    | 9230102K24Rik | 0.562675 | 1 | 0.947845 | 6.09746  | 11.2397  | No change |
| NM_001163288 | Susd1         | 0.562892 | 1 | 0.760047 | 9.89872  | 15.9705  | No change |
| NM_028248    | Tmem87b       | 0.563223 | 1 | 0.744783 | 8.36858  | 13.3579  | No change |
| NM_007621    | Cbr2          | 0.563617 | 1 | 0.925922 | 8.87373  | 16.102   | No change |
| NM_146174    | Fam115c       | 0.564222 | 1 | 1.18257  | 0.654855 | 1.43346  | No change |
| NM_016752    | Slc35b1       | 0.564655 | 1 | 0.786511 | 21.82    | 35.8648  | No change |
| NR_015570    | LOC624853     | 0.564788 | 1 | 0.660897 | 393.13   | 591.78   | No change |
| NM_023258    | Pycard        | 0.565148 | 1 | 0.854937 | 6.8224   | 11.769   | No change |
| NR_015476    | 1500011K16Rik | 0.565164 | 1 | 1.03478  | 6.36701  | 12.4969  | No change |
| NM_008634    | Mtap1b        | 0.565201 | 1 | 0.625664 | 30.7185  | 45.1207  | No change |
| NM_008927    | Map2k1        | 0.565532 | 1 | 0.766808 | 13.0802  | 21.2035  | No change |
| NM_181821    | Hcfc1r1       | 0.565955 | 1 | 0.765932 | 25.455   | 41.2379  | No change |
| NM_019511    | Ramp3         | 0.566135 | 1 | 0.762593 | 26.884   | 43.4509  | No change |
| NM_175193    | Golim4        | 0.566459 | 1 | 0.819456 | 4.67084  | 7.85755  | No change |
| NM_001081059 | Ccdc90a       | 0.566493 | 1 | 0.939525 | 1.95191  | 3.57636  | No change |
| NM_001076676 | Usp33         | 0.566896 | 1 | 0.721713 | 12.9435  | 20.3287  | No change |
| NM_133829    | Mfsd6         | 0.567199 | 1 | 0.724307 | 10.9142  | 17.1726  | No change |
| NM_001177886 | Igsf5         | 0.567387 | 1 | 0.892191 | 7.57934  | 13.4251  | No change |
| NM_016781    | Prkag1        | 0.567418 | 1 | 0.735123 | 27.7666  | 44.0207  | No change |
| NM_027893    | Pvrl4         | 0.567538 | 1 | 0.760055 | 9.76576  | 15.7555  | No change |
| NM_025985    | Ube2g1        | 0.568122 | 1 | 0.801159 | 5.99392  | 9.95382  | No change |
| NR_026596    | Gm5126        | 0.568191 | 1 | 1.11385  | 1.6967   | 3.52854  | No change |
| NM_026435    | Ufm1          | 0.568432 | 1 | 0.741196 | 8.79216  | 13.9983  | No change |
| NM_172871    | Klh9          | 0.568489 | 1 | 0.674864 | 27.4177  | 41.6752  | No change |
| NM_001025570 | Prrx1         | 0.568565 | 1 | 0.848265 | 3.82648  | 6.56945  | No change |
| NM_009796    | Capn7         | 0.568584 | 1 | 0.742586 | 11.8406  | 18.8701  | No change |
| NM_027144    | Arhgef12      | 0.568629 | 1 | 0.642488 | 23.1423  | 34.3923  | No change |
| NM_025311    | D14Ert449e    | 0.568737 | 1 | 0.732912 | 24.0053  | 37.9985  | No change |
| NM_001160303 | Gm4788        | 0.568925 | 1 | 0.961852 | 2.63403  | 4.90389  | No change |
| NM_023056    | Tmem176b      | 0.569226 | 1 | 0.677596 | 66.6864  | 101.557  | No change |
| NM_013871    | Mapk12        | 0.569491 | 1 | 0.928937 | 4.86744  | 8.85042  | No change |
| NM_016963    | Tmod3         | 0.569965 | 1 | 0.724813 | 14.9287  | 23.497   | No change |
| NM_001081178 | Gpr116        | 0.570102 | 1 | 0.769961 | 3.70716  | 6.02253  | No change |
| NM_010100    | Edar          | 0.570201 | 1 | 0.932181 | 2.46198  | 4.48694  | No change |
| NM_175507    | Tmem20        | 0.570378 | 1 | 0.749125 | 11.485   | 18.3873  | No change |
| NM_010132    | Emx2          | 0.570421 | 1 | 0.848298 | 6.11624  | 10.5006  | No change |
| NM_001172099 | Cuedc1        | 0.570826 | 1 | 0.911495 | 3.44853  | 6.1926   | No change |
| NM_078479    | Mrps21        | 0.570919 | 1 | 0.803863 | 56.5078  | 94.0162  | No change |
| NM_021552    | Nsa2          | 0.570987 | 1 | 0.700108 | 28.9566  | 44.7959  | No change |
| NM_025482    | Tpd52l2       | 0.571263 | 1 | 0.800889 | 10.2756  | 17.0605  | No change |
| NM_172134    | Pdxk          | 0.57139  | 1 | 0.724097 | 10.822   | 17.0246  | No change |
| NM_021563    | Erbb2ip       | 0.571478 | 1 | 0.651296 | 32.5161  | 48.6195  | No change |
| NM_001025615 | Ccdc50        | 0.571564 | 1 | 0.689797 | 13.4241  | 20.6182  | No change |
| NM_181073    | Plekhh1       | 0.5716   | 1 | 0.773574 | 4.80566  | 7.82688  | No change |
| NM_001081081 | Gls           | 0.571842 | 1 | 0.727635 | 10.6368  | 16.7748  | No change |
| NM_001202500 | Armcx4        | 0.57195  | 1 | 0.905268 | 3.2557   | 5.8203   | No change |
| NM_211358    | Slc35c1       | 0.572363 | 1 | 0.930409 | 2.95384  | 5.37632  | No change |
| NM_010601    | Kcnh3         | 0.573055 | 1 | 0.829367 | 5.25177  | 8.89623  | No change |
| NM_009987    | Cx3cr1        | 0.573137 | 1 | 0.922671 | 2.61652  | 4.73601  | No change |
| NM_024460    | Ost4          | 0.573141 | 1 | 0.744047 | 85.5136  | 136.417  | No change |
| NM_008037    | Fosl2         | 0.57316  | 1 | 0.816125 | 3.58985  | 6.02442  | No change |
| NM_145410    | Fam173a       | 0.573394 | 1 | 0.776647 | 38.0617  | 62.1234  | No change |
| NR_033146    | LOC100316870  | 0.573553 | 1 | 1.10136  | 0.317039 | 0.653166 | No change |
| NM_133931    | Pot1a         | 0.573967 | 1 | 0.892161 | 3.77973  | 6.69412  | No change |
| NM_010458    | Hoxb3         | 0.574238 | 1 | 0.85082  | 4.83833  | 8.32108  | No change |
| NM_024214    | Tomm20        | 0.574587 | 1 | 0.753079 | 39.5779  | 63.5375  | No change |
| NM_025826    | Acad5b        | 0.574723 | 1 | 0.717136 | 18.9845  | 29.7199  | No change |

|              |               |          |   |          |          |         |           |
|--------------|---------------|----------|---|----------|----------|---------|-----------|
| NM_010346    | Grb7          | 0.574826 | 1 | 0.99521  | 2.73306  | 5.21136 | No change |
| NM_010368    | Gusb          | 0.574864 | 1 | 0.781279 | 12.0317  | 19.7016 | No change |
| NM_031881    | Nedd4l        | 0.575053 | 1 | 0.780532 | 3.63232  | 5.9447  | No change |
| NR_027375    | Ythdf3        | 0.57553  | 1 | 0.686962 | 19.8746  | 30.4646 | No change |
| NM_009128    | Scd2          | 0.575626 | 1 | 0.617455 | 140.038  | 204.521 | No change |
| NM_001177467 | Gm7030        | 0.575857 | 1 | 0.977038 | 8.06236  | 15.1727 | No change |
| NM_033370    | Copb1         | 0.576123 | 1 | 0.666912 | 48.0387  | 72.6139 | No change |
| NM_177358    | Zfp945        | 0.576173 | 1 | 0.821377 | 3.11712  | 5.25035 | No change |
| NM_177608    | Secisbp2l     | 0.576558 | 1 | 0.681063 | 17.595   | 26.8596 | No change |
| NR_002890    | Gm12070       | 0.576856 | 1 | 0.657026 | 124.524  | 186.936 | No change |
| NM_026037    | Mboat2        | 0.577191 | 1 | 0.777492 | 11.2255  | 18.3323 | No change |
| NM_010876    | Ncf1          | 0.577223 | 1 | 0.981943 | 2.61252  | 4.93382 | No change |
| NM_009906    | Tpp1          | 0.577285 | 1 | 0.759925 | 10.8908  | 17.5676 | No change |
| NM_008796    | Pctp          | 0.577621 | 1 | 0.722718 | 31.01    | 48.7348 | No change |
| NM_001078649 | Tmem134       | 0.578018 | 1 | 0.902351 | 7.52941  | 13.4312 | No change |
| NM_010477    | Hspd1         | 0.57802  | 1 | 0.716013 | 29.0487  | 45.4389 | No change |
| NM_139302    | Sh3glb2       | 0.578361 | 1 | 0.783514 | 17.3323  | 28.4251 | No change |
| NM_029956    | Mmab          | 0.578469 | 1 | 0.945349 | 2.93984  | 5.40776 | No change |
| NM_019698    | Aldh18a1      | 0.578511 | 1 | 0.84072  | 5.07828  | 8.6711  | No change |
| NM_021540    | Rnf130        | 0.578615 | 1 | 0.871882 | 9.43807  | 16.475  | No change |
| NM_144867    | Slimo1        | 0.579    | 1 | 1.03139  | 2.57288  | 5.03564 | No change |
| NM_177321    | Mia2          | 0.579    | 1 | 1.03139  | 3.42471  | 6.70284 | No change |
| NM_012032    | Serinc3       | 0.579101 | 1 | 0.621021 | 205.551  | 300.943 | No change |
| NM_009424    | Traf6         | 0.5792   | 1 | 0.815331 | 4.07412  | 6.83286 | No change |
| NM_011989    | Slc27a4       | 0.579219 | 1 | 0.794237 | 6.76411  | 11.177  | No change |
| NM_008138    | Gnai2         | 0.579369 | 1 | 0.700717 | 40.4648  | 62.6234 | No change |
| NM_026081    | Gprasp1       | 0.579526 | 1 | 0.695684 | 16.3858  | 25.2697 | No change |
| NM_025841    | Kdelr2        | 0.57957  | 1 | 0.726767 | 32.0588  | 50.5253 | No change |
| NM_001037878 | Tcf25         | 0.579742 | 1 | 0.744134 | 17.2578  | 27.5312 | No change |
| NM_001005864 | Mtus1         | 0.580229 | 1 | 0.737976 | 12.3817  | 19.6673 | No change |
| NR_027759    | Dctd          | 0.580292 | 1 | 1.30027  | 0.722474 | 1.72766 | No change |
| NR_033547    | Gm10684       | 0.580499 | 1 | 1.07079  | 2.11958  | 4.269   | No change |
| NM_172396    | 9130011J15Rik | 0.580508 | 1 | 0.726194 | 21.3101  | 33.5715 | No change |
| NM_212457    | Bex4          | 0.580628 | 1 | 0.81778  | 28.2515  | 47.4628 | No change |
| NR_028097    | Rabggtb       | 0.580633 | 1 | 0.815664 | 16.5765  | 27.8071 | No change |
| NM_177806    | Prpf39        | 0.580743 | 1 | 0.731768 | 13.8255  | 21.8655 | No change |
| NM_009347    | Tecta         | 0.581121 | 1 | 0.802181 | 3.4856   | 5.7918  | No change |
| NM_181319    | Tbx22         | 0.581358 | 1 | 0.946745 | 1.69495  | 3.12075 | No change |
| NM_009547    | Zfp161        | 0.581722 | 1 | 0.84095  | 5.14144  | 8.78005 | No change |
| NR_028300    | 5330426P16Rik | 0.582017 | 1 | 0.988324 | 3.87823  | 7.35709 | No change |
| NM_001177572 | Slc25a13      | 0.582362 | 1 | 0.803672 | 8.17814  | 13.6032 | No change |
| NM_001033213 | Ttc7b         | 0.582917 | 1 | 0.739069 | 15.2466  | 24.2362 | No change |
| NM_021716    | Fign          | 0.58294  | 1 | 0.971836 | 0.892571 | 1.67322 | No change |
| NM_008129    | Gclm          | 0.583423 | 1 | 0.813638 | 15.9772  | 26.7629 | No change |
| NM_025835    | Pccb          | 0.583442 | 1 | 0.76247  | 17.2787  | 27.9205 | No change |
| NM_029789    | Lass2         | 0.584203 | 1 | 0.795958 | 13.8557  | 22.9219 | No change |
| NM_144958    | Eif4a1        | 0.584563 | 1 | 0.693604 | 58.201   | 89.6242 | No change |
| NM_011671    | Ucp2          | 0.584585 | 1 | 0.759746 | 10.0164  | 16.1543 | No change |
| NM_019709    | Mbtps1        | 0.584701 | 1 | 0.69121  | 26.2424  | 40.3434 | No change |
| NM_001163614 | Ascl4         | 0.584783 | 1 | 0.968804 | 6.86689  | 12.8442 | No change |
| NM_001161731 | Ang           | 0.585629 | 1 | 1.29443  | 2.52322  | 6.00499 | No change |
| NM_012043    | Islr          | 0.585783 | 1 | 1.02075  | 2.72262  | 5.28681 | No change |
| NM_010476    | Hsd17b7       | 0.586219 | 1 | 0.853145 | 3.76348  | 6.48222 | No change |
| NM_027016    | Sec62         | 0.58658  | 1 | 0.709777 | 21.4913  | 33.4699 | No change |
| NM_173752    | 1110067D22Rik | 0.586604 | 1 | 0.796781 | 7.80331  | 12.9165 | No change |
| NM_053102    | Sep15         | 0.586774 | 1 | 0.689325 | 82.1167  | 126.074 | No change |
| NM_007520    | Bach1         | 0.586946 | 1 | 0.832179 | 3.50963  | 5.95603 | No change |
| NM_024207    | Der1          | 0.586961 | 1 | 0.714843 | 25.1072  | 39.2396 | No change |
| NM_145429    | Arrb2         | 0.586961 | 1 | 1.00463  | 3.8315   | 7.35359 | No change |
| NM_025560    | 1810049H13Rik | 0.586965 | 1 | 1.11385  | 4.90432  | 10.1925 | No change |
| NR_030451    | Mir682        | 0.587234 | 1 | 0.727902 | 676.602  | 1067.14 | No change |
| NM_001035510 | Zcchc18       | 0.587289 | 1 | 1.01545  | 1.88529  | 3.64673 | No change |
| NM_010261    | Rabac1        | 0.587548 | 1 | 0.704069 | 109.119  | 169.263 | No change |
| NM_027828    | Fam110c       | 0.587619 | 1 | 0.85196  | 6.57776  | 11.3198 | No change |
| NM_008323    | Idh3g         | 0.588656 | 1 | 0.770202 | 28.8511  | 46.8718 | No change |
| NM_016799    | Srrm1         | 0.588914 | 1 | 0.710666 | 23.3804  | 36.4341 | No change |
| NM_029103    | Manf          | 0.589411 | 1 | 0.672157 | 86.816   | 131.704 | No change |
| NM_177994    | C030046I01Rik | 0.589474 | 1 | 0.854251 | 9.60622  | 16.558  | No change |
| NM_001083901 | Hiatl1        | 0.589736 | 1 | 0.770149 | 11.5226  | 18.7188 | No change |
| NM_009099    | Trim30a       | 0.589975 | 1 | 0.867108 | 4.21485  | 7.33144 | No change |
| NM_001004066 | Zfp386        | 0.59     | 1 | 0.769166 | 19.1023  | 31.0109 | No change |
| NM_001033289 | Slc9a2        | 0.590009 | 1 | 0.835139 | 5.88589  | 10.0092 | No change |
| NM_009179    | St3gal2       | 0.590054 | 1 | 0.701041 | 23.574   | 36.4897 | No change |
| NM_008756    | Ocln          | 0.590242 | 1 | 0.795286 | 9.34479  | 15.4513 | No change |
| NM_080857    | Asb13         | 0.590419 | 1 | 0.978925 | 3.27932  | 6.17786 | No change |
| NM_145385    | Mif2          | 0.590728 | 1 | 0.789174 | 20.6732  | 34.0356 | No change |

|              |               |          |   |          |          |         |           |
|--------------|---------------|----------|---|----------|----------|---------|-----------|
| NM_027412    | Ttc9c         | 0.590815 | 1 | 0.780117 | 10.1426  | 16.5926 | No change |
| NM_146061    | Prr5          | 0.591168 | 1 | 0.898632 | 6.9503   | 12.3629 | No change |
| NM_025921    | 2610002M06Rik | 0.591609 | 1 | 0.775686 | 6.38345  | 10.4104 | No change |
| NM_008638    | Mthfd2        | 0.591975 | 1 | 0.737671 | 29.1566  | 46.3    | No change |
| NM_144500    | Osbpl2        | 0.592062 | 1 | 0.762382 | 15.9443  | 25.7611 | No change |
| NM_001128601 | Gm2382        | 0.592074 | 1 | 0.975724 | 10.1469  | 19.0709 | No change |
| NM_008212    | Hadh          | 0.592159 | 1 | 0.73632  | 35.8594  | 56.8902 | No change |
| NM_016693    | Map3k6        | 0.592308 | 1 | 0.935258 | 2.33221  | 4.25808 | No change |
| NM_001113464 | Tec           | 0.592949 | 1 | 0.961852 | 3.36393  | 6.2597  | No change |
| NM_133196    | Cstf2         | 0.592996 | 1 | 0.735423 | 14.5247  | 23.0285 | No change |
| NM_001042534 | Capg          | 0.593141 | 1 | 0.78669  | 27.5119  | 45.2148 | No change |
| NM_001164578 | Tsr2          | 0.593276 | 1 | 0.827551 | 5.93443  | 10.0375 | No change |
| NM_021472    | Rnase4        | 0.593497 | 1 | 0.797759 | 19.7356  | 32.688  | No change |
| NM_008815    | Etv4          | 0.593568 | 1 | 0.851909 | 7.87626  | 13.553  | No change |
| NM_013913    | Angptl3       | 0.593784 | 1 | 1.42198  | 0.868989 | 2.28263 | No change |
| NM_015787    | Hist1h1e      | 0.594216 | 1 | 0.786396 | 17.6488  | 28.9989 | No change |
| NM_146041    | Gm5           | 0.594275 | 1 | 0.911592 | 7.89238  | 14.168  | No change |
| NM_001081206 | Dgki          | 0.594462 | 1 | 0.881789 | 3.19818  | 5.62087 | No change |
| NM_023755    | Tcfcp2l1      | 0.59463  | 1 | 0.722372 | 8.51803  | 13.3824 | No change |
| NM_001204281 | Hdac7         | 0.59466  | 1 | 0.849759 | 4.98201  | 8.55962 | No change |
| NM_030108    | Tmem33        | 0.59476  | 1 | 0.763078 | 8.34965  | 13.4968 | No change |
| NM_021538    | Cope          | 0.594845 | 1 | 0.815196 | 24.8277  | 41.629  | No change |
| NM_009638    | Crisp1        | 0.594851 | 1 | 0.640284 | 453.841  | 673.395 | No change |
| NM_133919    | Aff1          | 0.594859 | 1 | 0.732523 | 8.13908  | 12.878  | No change |
| NM_026341    | Nudt13        | 0.595294 | 1 | 1.04931  | 2.18222  | 4.3251  | No change |
| NM_177359    | Zfp799        | 0.595648 | 1 | 0.871991 | 3.76053  | 6.56336 | No change |
| NM_025692    | Uba5          | 0.595666 | 1 | 0.766562 | 18.0761  | 29.2902 | No change |
| NM_145959    | D15Ert621e    | 0.595766 | 1 | 0.71985  | 14.9032  | 23.3726 | No change |
| NM_011237    | Rad9          | 0.595862 | 1 | 0.792312 | 15.9074  | 26.2462 | No change |
| NM_013478    | Azgp1         | 0.595929 | 1 | 1.69882  | 0.636465 | 2.07615 | No change |
| NM_026373    | Cdk2ap2       | 0.596238 | 1 | 0.874876 | 17.2129  | 30.1033 | No change |
| NR_003546    | 2410002O22Rik | 0.596659 | 1 | 1.07321  | 3.02272  | 6.09587 | No change |
| NM_133990    | Il13ra1       | 0.596733 | 1 | 0.835899 | 5.86291  | 9.97476 | No change |
| NM_023907    | Foxi1         | 0.596851 | 1 | 0.809    | 11.7833  | 19.6708 | No change |
| NM_016800    | Vti1b         | 0.597138 | 1 | 0.739636 | 49.2366  | 78.292  | No change |
| NM_007682    | Cenpb         | 0.597148 | 1 | 0.758616 | 17.9093  | 28.8587 | No change |
| NM_029752    | Bri3bp        | 0.59752  | 1 | 0.770677 | 6.04378  | 9.82143 | No change |
| NM_008704    | Nme1          | 0.597833 | 1 | 0.773966 | 33.0124  | 53.7706 | No change |
| NM_173864    | Gm5077        | 0.598169 | 1 | 0.926353 | 4.16273  | 7.55127 | No change |
| NM_001033268 | Fam120a       | 0.598215 | 1 | 0.693866 | 28.9372  | 44.5665 | No change |
| NM_010439    | Hmgb1         | 0.59824  | 1 | 0.706699 | 47.7196  | 74.1539 | No change |
| NM_013476    | Ar            | 0.598245 | 1 | 0.758033 | 16.6157  | 26.763  | No change |
| NM_001146001 | Pdzk1         | 0.598438 | 1 | 0.676813 | 89.9453  | 136.89  | No change |
| NM_025965    | Ssr1          | 0.598476 | 1 | 0.676425 | 23.1711  | 35.2552 | No change |
| NM_016740    | S100a11       | 0.598797 | 1 | 0.800009 | 61.3962  | 101.846 | No change |
| NM_001168507 | Tmem11        | 0.599167 | 1 | 0.895083 | 9.1325   | 16.2017 | No change |
| NM_001024141 | Nxf3          | 0.599231 | 1 | 0.709079 | 36.04    | 56.0972 | No change |
| NM_001081005 | 1500012F01Rik | 0.599333 | 1 | 0.98261  | 10.7656  | 20.331  | No change |
| NM_011943    | Map2k6        | 0.599407 | 1 | 1.32887  | 0.911681 | 2.22608 | No change |
| NM_178600    | Vkorc1        | 0.599504 | 1 | 0.853988 | 25.3429  | 43.6696 | No change |
| NM_025958    | Cand2         | 0.599517 | 1 | 0.752469 | 9.99448  | 16.0355 | No change |
| NM_172988    | Fbxl4         | 0.600326 | 1 | 0.87257  | 6.63475  | 11.5839 | No change |
| NM_001166497 | 3110052M02Rik | 0.600802 | 1 | 0.987163 | 1.78741  | 3.38652 | No change |
| NM_029555    | Gstk1         | 0.600802 | 1 | 0.987163 | 8.39313  | 15.9021 | No change |
| NM_008477    | Ktn1          | 0.601061 | 1 | 0.807193 | 6.55751  | 10.9327 | No change |
| NM_144847    | Nrbp2         | 0.601203 | 1 | 0.719858 | 36.7172  | 57.5823 | No change |
| NM_172116    | Pddc1         | 0.601329 | 1 | 0.811826 | 18.8082  | 31.4595 | No change |
| NM_001033258 | D10Bwg1379e   | 0.601643 | 1 | 0.772663 | 5.26769  | 8.57193 | No change |
| NM_153781    | Pygb          | 0.601826 | 1 | 0.791567 | 9.09749  | 15.0017 | No change |
| NM_001037298 | Fam38a        | 0.601931 | 1 | 0.75269  | 6.82848  | 10.9574 | No change |
| NM_010398    | H2-T23        | 0.602221 | 1 | 0.809508 | 22.0668  | 36.8494 | No change |
| NM_053191    | Pi15          | 0.603037 | 1 | 0.957129 | 1.35903  | 2.51989 | No change |
| NM_017463    | Pbx2          | 0.603054 | 1 | 0.94332  | 3.65757  | 6.71519 | No change |
| NM_152809    | Csnk1g3       | 0.60308  | 1 | 0.829163 | 5.5196   | 9.34557 | No change |
| NM_001163098 | Tchh          | 0.603557 | 1 | 0.899295 | 2.36978  | 4.21647 | No change |
| NM_008714    | Notch1        | 0.603656 | 1 | 0.727803 | 8.79883  | 13.8755 | No change |
| NM_133734    | Dcaf11        | 0.603841 | 1 | 0.74224  | 26.5748  | 42.3324 | No change |
| NM_207707    | Esr2          | 0.604024 | 1 | 1.02075  | 1.96931  | 3.8223  | No change |
| NM_001101561 | Gm6251        | 0.604647 | 1 | 0.797888 | 56.7432  | 93.9831 | No change |
| NR_028560    | Scarna17      | 0.604753 | 1 | 1.51825  | 17.9853  | 50.9484 | No change |
| NM_183115    | Ccdc125       | 0.604882 | 1 | 1.21339  | 1.05634  | 2.36207 | No change |
| NM_023396    | Rprm          | 0.605155 | 1 | 0.936977 | 7.39891  | 13.5223 | No change |
| NM_133643    | Edaradd       | 0.60546  | 1 | 0.944535 | 1.27293  | 2.33899 | No change |
| NM_019574    | Patz1         | 0.605493 | 1 | 0.900451 | 5.47312  | 9.74589 | No change |
| NM_019979    | Selk          | 0.605749 | 1 | 0.824348 | 25.5358  | 43.0887 | No change |
| NM_027560    | Arrdc2        | 0.605818 | 1 | 0.80364  | 13.6356  | 22.6757 | No change |

|              |               |          |   |          |          |          |           |
|--------------|---------------|----------|---|----------|----------|----------|-----------|
| NM_021604    | Agrn          | 0.605971 | 1 | 0.75692  | 8.16921  | 13.1473  | No change |
| NM_080463    | Pofut1        | 0.606099 | 1 | 0.826974 | 4.54005  | 7.67496  | No change |
| NM_008084    | Gapdh         | 0.606252 | 1 | 0.688669 | 155.961  | 239.323  | No change |
| NM_010689    | Lat           | 0.60652  | 1 | 1.15412  | 2.93682  | 6.28316  | No change |
| NM_028000    | Ppapdc1b      | 0.606612 | 1 | 0.935398 | 7.48063  | 13.6559  | No change |
| NM_001033421 | Pate2         | 0.606724 | 1 | 0.780216 | 18.9414  | 30.9852  | No change |
| NM_177905    | Piwil4        | 0.606733 | 1 | 1.04514  | 2.24645  | 4.43759  | No change |
| NM_001128198 | Vps13d        | 0.607172 | 1 | 0.679269 | 19.2615  | 29.364   | No change |
| NM_026113    | Gtf3c6        | 0.607181 | 1 | 0.924821 | 11.6155  | 21.0446  | No change |
| NM_029953    | Arhgef38      | 0.607194 | 1 | 1.02174  | 3.50289  | 6.80323  | No change |
| NM_175372    | Rdh13         | 0.60787  | 1 | 0.965463 | 3.02216  | 5.63668  | No change |
| NM_019824    | Arpc3         | 0.60827  | 1 | 0.83419  | 28.6004  | 48.5944  | No change |
| NM_021610    | Gpa33         | 0.608279 | 1 | 1.17044  | 1.4893   | 3.2248   | No change |
| NM_175134    | Ankrd46       | 0.608352 | 1 | 0.841111 | 9.18935  | 15.6898  | No change |
| NM_011300    | Rps7          | 0.608454 | 1 | 0.722103 | 103.923  | 163.229  | No change |
| NM_016763    | Hsd17b10      | 0.608652 | 1 | 0.91779  | 13.7703  | 24.8234  | No change |
| NM_146226    | Apeh          | 0.609132 | 1 | 0.832878 | 10.3476  | 17.5649  | No change |
| NM_001167832 | Zfp764        | 0.610076 | 1 | 1.04595  | 2.42557  | 4.79381  | No change |
| NM_145515    | Mark1         | 0.610388 | 1 | 0.906563 | 3.00756  | 5.37843  | No change |
| NM_001177399 | Etohi1        | 0.610537 | 1 | 0.863311 | 5.72961  | 9.93699  | No change |
| NM_007936    | Epha4         | 0.610669 | 1 | 0.90198  | 2.24674  | 4.00477  | No change |
| NM_007899    | Ecm1          | 0.610899 | 1 | 0.817462 | 15.3772  | 25.8206  | No change |
| NM_011436    | Sorl1         | 0.610915 | 1 | 0.760316 | 8.2169   | 13.2552  | No change |
| NM_001081364 | Arhgap21      | 0.611064 | 1 | 0.774153 | 6.85685  | 11.1689  | No change |
| NM_026177    | 1200011118Rik | 0.611101 | 1 | 0.773726 | 8.78837  | 14.3108  | No change |
| NM_029492    | Zdhhc20       | 0.611907 | 1 | 0.718839 | 21.8388  | 34.2232  | No change |
| NM_028662    | Slc35b2       | 0.612218 | 1 | 0.838329 | 11.3112  | 19.2741  | No change |
| NM_175212    | Tmem65        | 0.612256 | 1 | 0.826825 | 7.40153  | 12.5102  | No change |
| NM_022317    | Slc28a3       | 0.612298 | 1 | 0.813792 | 6.73413  | 11.2783  | No change |
| NM_026697    | Rab14         | 0.612936 | 1 | 0.741128 | 25.312   | 40.2878  | No change |
| NM_144826    | Utp6          | 0.612959 | 1 | 0.803515 | 8.91191  | 14.8181  | No change |
| NM_001081286 | Fat1          | 0.613375 | 1 | 0.665445 | 33.1955  | 50.1217  | No change |
| NM_207659    | Hook3         | 0.613466 | 1 | 0.728417 | 7.59043  | 11.9745  | No change |
| NM_178205    | Hist1h3e      | 0.613551 | 1 | 1.23487  | 6.6132   | 15.022   | No change |
| NM_010137    | Epas1         | 0.614185 | 1 | 0.798353 | 6.9146   | 11.4554  | No change |
| NM_001009935 | Txnp1         | 0.614278 | 1 | 0.727563 | 35.8293  | 56.4896  | No change |
| NM_010070    | Dok1          | 0.614365 | 1 | 0.888869 | 8.91915  | 15.7503  | No change |
| NR_028538    | Scarna2       | 0.614724 | 1 | 0.92121  | 209.079  | 377.785  | No change |
| NM_001083922 | Wbp1          | 0.615042 | 1 | 0.807428 | 25.6457  | 42.7587  | No change |
| NM_175677    | Trim12c       | 0.61524  | 1 | 0.872354 | 5.10606  | 8.91185  | No change |
| NM_031165    | Hspa8         | 0.615959 | 1 | 0.664977 | 255.717  | 385.507  | No change |
| NM_008963    | Ptgsd         | 0.616068 | 1 | 0.67896  | 411.578  | 627.301  | No change |
| NM_001077189 | Fcgr2b        | 0.616349 | 1 | 0.817291 | 19.9573  | 33.5055  | No change |
| NM_009388    | Tkt           | 0.616493 | 1 | 0.767404 | 17.3852  | 28.1836  | No change |
| NM_025650    | Uqcr11        | 0.616513 | 1 | 0.782578 | 105.019  | 172.068  | No change |
| NM_178633    | Klh2          | 0.616726 | 1 | 0.854503 | 7.18579  | 12.3843  | No change |
| NM_198860    | Al646023      | 0.616919 | 1 | 0.893037 | 3.45359  | 6.11651  | No change |
| NM_011584    | Nr1d2         | 0.616955 | 1 | 0.76944  | 11.7607  | 19.0927  | No change |
| NM_008681    | Ndrp1         | 0.617388 | 1 | 0.77269  | 18.1829  | 29.5858  | No change |
| NM_011945    | Map3k1        | 0.617457 | 1 | 0.734328 | 13.5161  | 21.4104  | No change |
| NM_007498    | Atf3          | 0.618082 | 1 | 1.20696  | 1.55187  | 3.45149  | No change |
| NM_008698    | Nipsnap1      | 0.618364 | 1 | 1.08471  | 2.75202  | 5.59311  | No change |
| NM_029361    | Wnk2          | 0.618539 | 1 | 0.918003 | 2.02345  | 3.64763  | No change |
| NM_026638    | Cdipt         | 0.618637 | 1 | 0.825693 | 15.4543  | 26.0989  | No change |
| NM_001042611 | Cp            | 0.618813 | 1 | 0.730739 | 22.5082  | 35.5652  | No change |
| NM_001130485 | Rpl35a        | 0.618945 | 1 | 0.738649 | 182.766  | 290.387  | No change |
| NM_007604    | Capza2        | 0.618966 | 1 | 0.791334 | 21.336   | 35.1725  | No change |
| NM_025388    | Ufc1          | 0.619217 | 1 | 0.765015 | 62.0296  | 100.388  | No change |
| NM_001170430 | Slc35b3       | 0.619233 | 1 | 0.860281 | 10.8237  | 18.7297  | No change |
| NM_001033713 | Mef2a         | 0.619406 | 1 | 0.763255 | 21.4178  | 34.6198  | No change |
| NM_010165    | Eya2          | 0.619577 | 1 | 1.35897  | 0.766504 | 1.91321  | No change |
| NM_175518    | D730040F13Rik | 0.620223 | 1 | 0.761352 | 9.26881  | 14.9621  | No change |
| NM_001161774 | St3gal3       | 0.620345 | 1 | 0.914014 | 6.25049  | 11.2354  | No change |
| NM_001098222 | Bhlhb9        | 0.620509 | 1 | 0.891462 | 5.86758  | 10.3797  | No change |
| NM_139141    | Zfp192        | 0.620552 | 1 | 0.78228  | 5.49081  | 8.99428  | No change |
| NM_017375    | Ostf1         | 0.620959 | 1 | 0.871212 | 11.3851  | 19.8535  | No change |
| NM_001081093 | Arfp1         | 0.621631 | 1 | 0.797474 | 13.4763  | 22.3112  | No change |
| NM_021273    | Ckb           | 0.621666 | 1 | 0.797802 | 27.3962  | 45.3672  | No change |
| NM_028421    | Zc3hav1       | 0.621671 | 1 | 0.803833 | 9.98245  | 16.6007  | No change |
| NM_177215    | Ocll          | 0.621721 | 1 | 0.809499 | 6.84556  | 11.4295  | No change |
| NM_134050    | Rab15         | 0.621811 | 1 | 1.01198  | 2.43011  | 4.68502  | No change |
| NM_001080974 | Sri           | 0.621896 | 1 | 0.896119 | 6.90947  | 12.263   | No change |
| NM_001024142 | Fbxo10        | 0.621898 | 1 | 0.783825 | 10.3923  | 17.0414  | No change |
| NM_001105196 | Tcfe3         | 0.622    | 1 | 0.820636 | 9.96242  | 16.7641  | No change |
| NM_024266    | Rps25         | 0.62209  | 1 | 0.795213 | 61.3379  | 101.389  | No change |
| NM_027819    | Ggt6          | 0.622103 | 1 | 3.69882  | 0        | 0.433425 | No change |

|              |               |          |   |          |          |          |           |
|--------------|---------------|----------|---|----------|----------|----------|-----------|
| NM_007843    | Defb1         | 0.622274 | 1 | 0.875966 | 20.6948  | 36.209   | No change |
| NM_139152    | Asb18         | 0.622352 | 1 | 1.10351  | 3.42508  | 7.05638  | No change |
| NM_153559    | Qsox2         | 0.62259  | 1 | 0.766377 | 25.0997  | 40.6591  | No change |
| NM_007475    | Rplp0         | 0.622598 | 1 | 0.667998 | 469.505  | 710.15   | No change |
| NM_001033634 | Zyg11b        | 0.622738 | 1 | 0.732787 | 9.96922  | 15.7746  | No change |
| NM_172501    | Nhlrc3        | 0.622846 | 1 | 1.049    | 4.02075  | 7.96143  | No change |
| NM_134074    | Dock9         | 0.622868 | 1 | 0.747863 | 10.5527  | 16.8746  | No change |
| NM_009007    | Rac1          | 0.623435 | 1 | 0.741501 | 40.5442  | 64.5454  | No change |
| NM_172678    | Acad9         | 0.623446 | 1 | 0.871926 | 5.05821  | 8.8248   | No change |
| NM_153131    | Unc5a         | 0.623569 | 1 | 1.00407  | 2.01678  | 3.86595  | No change |
| NM_178886    | Ldlrad3       | 0.62388  | 1 | 0.869474 | 5.29936  | 9.22946  | No change |
| NM_172671    | Lgr4          | 0.6239   | 1 | 0.804244 | 7.61664  | 12.6698  | No change |
| NM_011980    | Zfp146        | 0.623908 | 1 | 0.846003 | 12.325   | 21.1129  | No change |
| NM_013844    | Zfp68         | 0.62413  | 1 | 0.827307 | 6.36384  | 10.7588  | No change |
| NM_001142411 | Zfp937        | 0.624215 | 1 | 0.940255 | 1.72218  | 3.15382  | No change |
| NM_001112798 | Slc8a1        | 0.624305 | 1 | 0.843766 | 1.38162  | 2.363    | No change |
| NM_001190314 | Mfrp          | 0.624428 | 1 | 0.791927 | 10.5432  | 17.387   | No change |
| NM_026433    | Tmem100       | 0.624469 | 1 | 1.0004   | 4.662    | 8.91282  | No change |
| NM_175464    | Pkp4          | 0.624645 | 1 | 0.799548 | 9.15254  | 15.1745  | No change |
| NM_026064    | 2900073G15Rik | 0.624656 | 1 | 0.775211 | 31.4186  | 51.2101  | No change |
| NM_025286    | Slc31a2       | 0.624699 | 1 | 0.817989 | 18.302   | 30.7394  | No change |
| NM_145569    | Mat2a         | 0.624721 | 1 | 0.706155 | 69.8421  | 108.48   | No change |
| NM_177614    | Os9           | 0.624922 | 1 | 0.719556 | 37.1612  | 58.2609  | No change |
| NM_178626    | Cdc42se2      | 0.624998 | 1 | 0.728702 | 38.1779  | 60.2376  | No change |
| NM_009255    | Serpine2      | 0.625166 | 1 | 1.08547  | 2.57745  | 5.24022  | No change |
| NM_001163319 | Tubgcp6       | 0.62552  | 1 | 0.737602 | 14.6959  | 23.3318  | No change |
| NM_172611    | Gramd4        | 0.625633 | 1 | 0.912392 | 3.5549   | 6.38219  | No change |
| NM_181328    | Slc25a29      | 0.625791 | 1 | 1.02256  | 3.72595  | 7.23758  | No change |
| NM_181058    | Zbtb20        | 0.626188 | 1 | 0.746416 | 30.3563  | 48.4921  | No change |
| NM_001033164 | 2510002D24Rik | 0.626202 | 1 | 1.00504  | 6.562    | 12.5867  | No change |
| NM_029494    | Rab30         | 0.626202 | 1 | 1.00504  | 4.19532  | 8.04715  | No change |
| NM_001011877 | Rnase11       | 0.626498 | 1 | 1.11385  | 8.06464  | 16.7388  | No change |
| NM_026763    | Col6a4        | 0.626642 | 1 | 0.721957 | 19.1119  | 30.0134  | No change |
| NM_010241    | Aktip         | 0.626832 | 1 | 0.744104 | 43.039   | 68.6408  | No change |
| NR_002847    | Malat1        | 0.627328 | 1 | 0.638614 | 1495.64  | 2216.55  | No change |
| NM_011992    | Rcn2          | 0.62806  | 1 | 0.777284 | 27.8499  | 45.4582  | No change |
| NM_146030    | Plekhh3       | 0.628621 | 1 | 1.13694  | 1.41379  | 2.98433  | No change |
| NM_053071    | Cox6c         | 0.628742 | 1 | 0.728533 | 257.296  | 405.912  | No change |
| NM_178920    | Mal2          | 0.628774 | 1 | 1.09449  | 1.85848  | 3.80298  | No change |
| NM_009919    | Cnih          | 0.62905  | 1 | 0.827706 | 21.2272  | 35.8955  | No change |
| NM_009861    | Cdc42         | 0.62908  | 1 | 0.714634 | 83.2708  | 130.102  | No change |
| NM_019437    | Rfk           | 0.6294   | 1 | 0.792191 | 19.1501  | 31.5857  | No change |
| NM_019394    | Mia1          | 0.629658 | 1 | 0.991371 | 15.7332  | 29.8813  | No change |
| NM_011971    | Psmb3         | 0.629751 | 1 | 0.933283 | 17.7331  | 32.3108  | No change |
| NR_029471    | Gm11968       | 0.629774 | 1 | 0.844095 | 32.6474  | 55.8471  | No change |
| NM_177776    | Smtnl2        | 0.629917 | 1 | 0.901069 | 6.26811  | 11.1626  | No change |
| NM_025637    | Rwdd3         | 0.630136 | 1 | 1.28835  | 1.39715  | 3.30171  | No change |
| NM_029321    | Ttc32         | 0.630136 | 1 | 1.28835  | 2.36956  | 5.5997   | No change |
| NM_026307    | Cuta          | 0.630164 | 1 | 0.89053  | 27.9861  | 49.4685  | No change |
| NM_001081499 | Tbc1d8b       | 0.630951 | 1 | 0.838865 | 4.84913  | 8.26441  | No change |
| NM_001099323 | Zkscan16      | 0.630964 | 1 | 1.1816   | 1.27213  | 2.77503  | No change |
| NM_001165954 | Phc3          | 0.631074 | 1 | 0.723816 | 13.5842  | 21.3599  | No change |
| NM_172891    | Styk1         | 0.631233 | 1 | 0.995535 | 2.59956  | 4.95183  | No change |
| NM_001103178 | Ablim1        | 0.631329 | 1 | 0.797423 | 7.71221  | 12.7669  | No change |
| NM_013876    | Rnf11         | 0.631562 | 1 | 0.758318 | 37.2328  | 59.9717  | No change |
| NM_007527    | Bax           | 0.631858 | 1 | 0.930789 | 15.3982  | 28.0059  | No change |
| NM_008202    | Slc39a7       | 0.63193  | 1 | 0.741171 | 44.9378  | 71.521   | No change |
| NM_001081279 | Mfhas1        | 0.631966 | 1 | 0.836526 | 4.62227  | 7.86474  | No change |
| NM_001081471 | Gm10035       | 0.632004 | 1 | 1.66405  | 0.626562 | 1.98592  | No change |
| NM_001164155 | Tnfrsf19      | 0.632097 | 1 | 0.907646 | 3.93706  | 7.04391  | No change |
| NM_001168333 | Tinagl1       | 0.632189 | 1 | 0.88964  | 9.38037  | 16.57    | No change |
| NR_027853    | Clk1          | 0.632352 | 1 | 0.750579 | 52.6204  | 84.2997  | No change |
| NM_029662    | Mfsd2a        | 0.632458 | 1 | 0.800663 | 20.6486  | 34.2593  | No change |
| NM_010605    | Kcnj5         | 0.632705 | 1 | 1.81429  | 0.170512 | 0.606774 | No change |
| NM_026522    | Chid1         | 0.632833 | 1 | 0.750051 | 23.4829  | 37.6065  | No change |
| NM_199446    | Phkb          | 0.633126 | 1 | 0.853184 | 5.50962  | 9.48505  | No change |
| NM_001161413 | Slc3a2        | 0.633495 | 1 | 0.715365 | 68.7019  | 107.393  | No change |
| NM_009716    | Atf4          | 0.633717 | 1 | 0.757954 | 47.9164  | 77.1597  | No change |
| NM_009370    | Tgfbr1        | 0.633783 | 1 | 0.742929 | 19.0038  | 30.2825  | No change |
| NM_009739    | Bckdk         | 0.633872 | 1 | 0.912868 | 5.41541  | 9.72457  | No change |
| NM_145394    | Slc44a3       | 0.634    | 1 | 0.898687 | 6.7515   | 12.0026  | No change |
| NM_001205385 | Actr3         | 0.634037 | 1 | 0.780962 | 22.949   | 37.5539  | No change |
| NM_138313    | Bmf           | 0.634126 | 1 | 0.87545  | 4.52786  | 7.91824  | No change |
| NM_028749    | Npl           | 0.634224 | 1 | 0.836221 | 21.658   | 36.8421  | No change |
| NM_016883    | Psmc10        | 0.634307 | 1 | 0.842371 | 19.6251  | 33.5288  | No change |
| NM_001038999 | Atp8a1        | 0.634316 | 1 | 0.787487 | 6.58221  | 10.8205  | No change |

|              |               |          |   |          |          |         |           |
|--------------|---------------|----------|---|----------|----------|---------|-----------|
| NM_175467    | Sptlc3        | 0.634323 | 1 | 1.41154  | 0.580985 | 1.5092  | No change |
| NM_021883    | Tmod1         | 0.634335 | 1 | 0.816341 | 13.1327  | 22.0299 | No change |
| NM_001038637 | Gng2          | 0.63446  | 1 | 1.06439  | 1.66748  | 3.33775 | No change |
| NM_008994    | Pxmp3         | 0.634479 | 1 | 0.808147 | 19.6392  | 32.7557 | No change |
| NM_001045520 | Clint1        | 0.63464  | 1 | 0.748381 | 29.1242  | 46.586  | No change |
| NM_001164316 | Fam190a       | 0.634872 | 1 | 1.08655  | 0.982817 | 1.99918 | No change |
| NM_008749    | Nucb1         | 0.634925 | 1 | 0.718642 | 70.2766  | 110.105 | No change |
| NM_133913    | Chpf2         | 0.634963 | 1 | 0.791927 | 13.7623  | 22.6942 | No change |
| NR_028543    | Snord47       | 0.635181 | 1 | 0.924194 | 220.873  | 399.82  | No change |
| NM_001163996 | Zfp605        | 0.635676 | 1 | 1.03547  | 2.27308  | 4.45568 | No change |
| NM_030692    | Sacm1l        | 0.63583  | 1 | 0.803067 | 13.0738  | 21.7276 | No change |
| NM_027382    | Hdac8         | 0.635898 | 1 | 1.10407  | 2.95104  | 6.07975 | No change |
| NM_011083    | Pik3c2a       | 0.636019 | 1 | 0.712044 | 27.9049  | 43.5191 | No change |
| NM_027179    | Tecr          | 0.636843 | 1 | 0.748487 | 90.9897  | 145.553 | No change |
| NM_025535    | Sar1b         | 0.637037 | 1 | 0.878265 | 16.7419  | 29.3352 | No change |
| NM_028882    | Sema3d        | 0.637218 | 1 | 0.908106 | 2.52224  | 4.51377 | No change |
| NM_027442    | Ddo           | 0.637359 | 1 | 1.1489   | 1.39386  | 2.96736 | No change |
| NM_144551    | Trib2         | 0.637902 | 1 | 0.94344  | 3.03807  | 5.575   | No change |
| NM_028339    | Tmx1          | 0.638043 | 1 | 0.797496 | 21.3284  | 35.3075 | No change |
| NM_182994    | Arl5a         | 0.638049 | 1 | 0.818518 | 7.3544   | 12.3554 | No change |
| NM_175224    | Metap1        | 0.638069 | 1 | 0.762488 | 32.2901  | 52.1604 | No change |
| NM_053099    | Setbp1        | 0.63818  | 1 | 0.783514 | 6.01368  | 9.85819 | No change |
| NM_013718    | Trappc3       | 0.638545 | 1 | 0.882849 | 16.258   | 28.5792 | No change |
| NM_021430    | Rilp1         | 0.639161 | 1 | 0.837968 | 13.9448  | 23.7494 | No change |
| NM_021717    | Nrip2         | 0.639224 | 1 | 1.2451   | 1.50707  | 3.44566 | No change |
| NM_001040695 | Uevld         | 0.639431 | 1 | 0.844015 | 6.41411  | 10.9704 | No change |
| NM_177850    | Bpi           | 0.639729 | 1 | 0.825117 | 20.3712  | 34.3822 | No change |
| NM_029814    | Chmp5         | 0.639777 | 1 | 0.830189 | 24.9919  | 42.3316 | No change |
| NM_016844    | Rps28         | 0.639804 | 1 | 0.820547 | 116.794  | 196.492 | No change |
| NM_025887    | Rab5a         | 0.639867 | 1 | 0.81355  | 17.5412  | 29.3663 | No change |
| NM_001146124 | Psap          | 0.640037 | 1 | 0.70002  | 141.069  | 218.17  | No change |
| NM_001167949 | Atp2b4        | 0.640101 | 1 | 0.7126   | 60.919   | 95.042  | No change |
| NM_007788    | Csnk2a1       | 0.640265 | 1 | 0.775975 | 16.3788  | 26.7082 | No change |
| NM_144546    | Zfp119a       | 0.640287 | 1 | 1.05911  | 3.2685   | 6.51658 | No change |
| NM_029951    | C330007P06Rik | 0.640464 | 1 | 0.820714 | 11.5007  | 19.3507 | No change |
| NM_025512    | Zfand1        | 0.640745 | 1 | 0.951004 | 7.75339  | 14.304  | No change |
| NM_133951    | Rrp8          | 0.641112 | 1 | 0.870496 | 8.05448  | 14.0353 | No change |
| NM_007561    | Bmpr2         | 0.641139 | 1 | 0.844754 | 8.50544  | 14.5547 | No change |
| NM_025964    | Mettl21a      | 0.641271 | 1 | 0.986476 | 3.68594  | 6.97444 | No change |
| NM_175152    | Thap3         | 0.641558 | 1 | 1.09548  | 4.87976  | 9.98887 | No change |
| NM_001033186 | Skap1         | 0.641721 | 1 | 1.0276   | 3.53238  | 6.88407 | No change |
| NM_008179    | Gspt2         | 0.641735 | 1 | 0.846722 | 11.7972  | 20.2155 | No change |
| NM_009982    | Ctsc          | 0.641755 | 1 | 0.861845 | 10.2622  | 17.7735 | No change |
| NM_009922    | Cnn1          | 0.642191 | 1 | 0.962817 | 5.78728  | 10.7668 | No change |
| NM_017467    | Zfp316        | 0.642354 | 1 | 0.891038 | 2.85121  | 5.04089 | No change |
| NM_146243    | Actr2         | 0.642628 | 1 | 0.752091 | 29.1005  | 46.6671 | No change |
| NM_001033820 | Zfp551        | 0.642914 | 1 | 1.16195  | 1.73039  | 3.71862 | No change |
| NM_001099349 | Gm14308       | 0.64298  | 1 | 0.832197 | 21.3188  | 36.1601 | No change |
| NM_001141948 | Nmi           | 0.643312 | 1 | 0.94252  | 10.0236  | 18.3802 | No change |
| NM_026228    | Slc39a8       | 0.643338 | 1 | 0.794426 | 16.8283  | 27.7971 | No change |
| NM_010397    | H2-T22        | 0.643529 | 1 | 0.836321 | 18.9891  | 32.3019 | No change |
| NM_001025208 | LOC547349     | 0.644057 | 1 | 0.849449 | 74.1039  | 127.225 | No change |
| NM_153081    | Slc16a11      | 0.644172 | 1 | 0.941153 | 7.69956  | 14.1047 | No change |
| NM_001163445 | 2700089E24Rik | 0.644362 | 1 | 0.819804 | 16.1728  | 27.1936 | No change |
| NM_016958    | Krt14         | 0.644742 | 1 | 0.842553 | 19.0606  | 32.5654 | No change |
| NM_028617    | Fam125a       | 0.644847 | 1 | 0.982149 | 9.71239  | 18.3195 | No change |
| NM_173006    | Pon3          | 0.64547  | 1 | 0.955534 | 6.9146   | 12.7968 | No change |
| NM_133697    | 1110003E01Rik | 0.645686 | 1 | 0.744256 | 63.3724  | 101.072 | No change |
| NM_011212    | Ptpre         | 0.645887 | 1 | 0.903799 | 3.36164  | 5.99695 | No change |
| NM_177583    | Aph1b         | 0.645898 | 1 | 0.895308 | 4.28127  | 7.59176 | No change |
| NM_001161338 | Sh3bp5l       | 0.646013 | 1 | 0.844423 | 10.4009  | 17.7933 | No change |
| NM_001165971 | Gm5803        | 0.646095 | 1 | 0.949735 | 11.0671  | 20.3973 | No change |
| NM_001025257 | Vegfa         | 0.64618  | 1 | 0.820281 | 12.3838  | 20.8293 | No change |
| NM_172752    | Sorbs2        | 0.646409 | 1 | 0.803752 | 8.40008  | 13.966  | No change |
| NM_175150    | Txndc15       | 0.64643  | 1 | 0.868444 | 16.2936  | 28.3497 | No change |
| NM_023397    | Mdp1          | 0.646473 | 1 | 0.873422 | 13.7134  | 23.9441 | No change |
| NM_001093754 | Dennd2d       | 0.646634 | 1 | 1.23939  | 1.44494  | 3.2884  | No change |
| NM_008772    | P2ry1         | 0.646634 | 1 | 1.23939  | 0.771178 | 1.75505 | No change |
| NM_001005419 | Ado           | 0.646824 | 1 | 0.790288 | 13.7975  | 22.7244 | No change |
| NM_198416    | Zzz3          | 0.646908 | 1 | 0.764157 | 12.2949  | 19.8832 | No change |
| NM_007585    | Anxa2         | 0.647153 | 1 | 0.782136 | 50.5705  | 82.8156 | No change |
| NM_001160235 | Fam168b       | 0.647342 | 1 | 0.779136 | 14.4235  | 23.5708 | No change |
| NM_007903    | Edn3          | 0.647821 | 1 | 1.01683  | 2.86957  | 5.54848 | No change |
| NM_001039512 | Ivns1abp      | 0.647869 | 1 | 0.710841 | 96.6894  | 150.661 | No change |
| NM_026775    | Tmed10        | 0.647958 | 1 | 0.745617 | 38.1473  | 60.8981 | No change |
| NM_177450    | Cndp1         | 0.648105 | 1 | 0.859538 | 9.7309   | 16.8248 | No change |



|              |               |          |   |          |          |                   |
|--------------|---------------|----------|---|----------|----------|-------------------|
| NM_011341    | Sdf4          | 0.648399 | 1 | 0.748584 | 24.6767  | 39.4753 No change |
| NM_001111324 | Nedd9         | 0.648771 | 1 | 0.796952 | 12.5701  | 20.7994 No change |
| NM_001174053 | Camk2b        | 0.648792 | 1 | 0.771314 | 21.1164  | 34.32 No change   |
| NM_026432    | Tmem66        | 0.649189 | 1 | 0.746458 | 71.3811  | 114.019 No change |
| NM_177688    | H2afj         | 0.649197 | 1 | 0.992902 | 5.41675  | 10.2951 No change |
| NM_016957    | Hmgn2         | 0.649657 | 1 | 0.807246 | 40.293   | 67.1538 No change |
| NM_008209    | Mr1           | 0.650002 | 1 | 0.939107 | 5.69432  | 10.4153 No change |
| NM_010399    | H2-T9         | 0.650076 | 1 | 0.844668 | 19.9426  | 34.1215 No change |
| NM_001165902 | Ctnnb1        | 0.650132 | 1 | 0.717702 | 82.9067  | 129.803 No change |
| NM_013889    | Zfp292        | 0.650173 | 1 | 0.761243 | 10.3663  | 16.7299 No change |
| NM_178598    | Tagln2        | 0.650395 | 1 | 0.85561  | 21.1802  | 36.5189 No change |
| NM_001024955 | Pik3r1        | 0.650582 | 1 | 0.787805 | 11.4902  | 18.8911 No change |
| NM_029748    | 2510006D16Rik | 0.651025 | 1 | 0.969465 | 15.294   | 28.5843 No change |
| NM_023210    | Anp32e        | 0.651388 | 1 | 0.858485 | 8.80782  | 15.217 No change  |
| NM_011309    | S100a1        | 0.651597 | 1 | 0.880656 | 37.8495  | 66.4212 No change |
| NM_029847    | Arsk          | 0.651597 | 1 | 0.880656 | 6.36517  | 11.1701 No change |
| NM_170669    | Rps15a        | 0.651681 | 1 | 0.778358 | 15.3938  | 25.1422 No change |
| NM_026172    | Decr1         | 0.652005 | 1 | 0.856242 | 9.98642  | 17.226 No change  |
| NM_026868    | Abhd13        | 0.652019 | 1 | 0.817155 | 8.85289  | 14.8571 No change |
| NM_001033422 | Thoc2         | 0.652047 | 1 | 0.747791 | 18.3585  | 29.3515 No change |
| NM_007557    | Bmp7          | 0.652396 | 1 | 0.965532 | 6.13269  | 11.4296 No change |
| NM_053069    | Atg5          | 0.652408 | 1 | 0.923838 | 6.93374  | 12.5451 No change |
| NM_019791    | Maged1        | 0.652414 | 1 | 0.700672 | 203.406  | 314.712 No change |
| NM_019730    | Nme3          | 0.65279  | 1 | 1.01472  | 12.259   | 23.6652 No change |
| NM_026496    | Grhl2         | 0.652823 | 1 | 0.813498 | 9.80717  | 16.4164 No change |
| NM_009157    | Map2k4        | 0.652906 | 1 | 0.798692 | 16.0365  | 26.5669 No change |
| NM_010273    | Gdi1          | 0.653034 | 1 | 0.867215 | 10.0723  | 17.5087 No change |
| NM_028096    | 2010300C02Rik | 0.653412 | 1 | 0.826491 | 9.54063  | 16.1163 No change |
| NM_001164613 | Atp13a4       | 0.653796 | 1 | 0.95185  | 4.63493  | 8.55424 No change |
| NM_001033347 | D430041D05Rik | 0.653807 | 1 | 1.06193  | 0.674759 | 1.34759 No change |
| NM_013795    | Atp5l         | 0.654032 | 1 | 0.808551 | 102.434  | 170.871 No change |
| NM_001081304 | Atf6          | 0.654135 | 1 | 0.762799 | 14.4746  | 23.3852 No change |
| NM_008667    | Nab1          | 0.654166 | 1 | 0.874472 | 4.9585   | 8.66345 No change |
| NM_030131    | Cnih4         | 0.654444 | 1 | 0.960099 | 3.88131  | 7.20546 No change |
| NM_018799    | Eif3i         | 0.655307 | 1 | 0.750774 | 126.754  | 203.073 No change |
| NM_133218    | Zfp704        | 0.655341 | 1 | 0.759204 | 8.55304  | 13.7836 No change |
| NM_025605    | 2400001E08Rik | 0.655404 | 1 | 0.852717 | 26.7372  | 46.0043 No change |
| NM_024270    | Stard3nl      | 0.655438 | 1 | 0.937266 | 11.724   | 21.4143 No change |
| NR_004445    | Snord22       | 0.655582 | 1 | 0.880365 | 191.932  | 336.734 No change |
| NM_026438    | Ppa1          | 0.655836 | 1 | 0.894192 | 16.5602  | 29.3387 No change |
| NM_025399    | Nudt14        | 0.656032 | 1 | 1.04611  | 9.4916   | 18.7399 No change |
| NM_012060    | Bcap31        | 0.656113 | 1 | 0.813987 | 41.3909  | 69.3073 No change |
| NM_001077694 | Dysf          | 0.656335 | 1 | 0.882347 | 3.49688  | 6.14361 No change |
| NM_013495    | Cpt1a         | 0.656394 | 1 | 0.778689 | 19.7201  | 32.215 No change  |
| NM_008869    | Pla2g4a       | 0.657128 | 1 | 0.904481 | 6.9546   | 12.4108 No change |
| NM_019980    | Litaf         | 0.65713  | 1 | 0.775707 | 40.3764  | 65.8218 No change |
| NM_025872    | Golt1b        | 0.657347 | 1 | 0.833657 | 14.3075  | 24.2898 No change |
| NM_009284    | Stat6         | 0.657521 | 1 | 0.900806 | 5.38495  | 9.58471 No change |
| NM_026029    | Glod4         | 0.657696 | 1 | 0.792287 | 27.623   | 45.5558 No change |
| NM_009000    | Rab24         | 0.657922 | 1 | 0.874416 | 14.0133  | 24.4821 No change |
| NM_021339    | Cdon          | 0.658119 | 1 | 0.843561 | 4.99463  | 8.53849 No change |
| NM_019397    | Egfl6         | 0.658203 | 1 | 1.13403  | 1.80685  | 3.80226 No change |
| NM_133351    | Prss8         | 0.659178 | 1 | 0.854539 | 17.3858  | 29.9515 No change |
| NM_008883    | Plxna3        | 0.659433 | 1 | 0.997159 | 1.47557  | 2.81249 No change |
| NM_019417    | Pdlim4        | 0.659738 | 1 | 0.933701 | 13.4681  | 24.5362 No change |
| NM_145923    | Rell1         | 0.660136 | 1 | 0.967156 | 3.87183  | 7.22341 No change |
| NM_008827    | Pgf           | 0.660237 | 1 | 0.867572 | 18.2117  | 31.6631 No change |
| NM_001163635 | Tnks2         | 0.660555 | 1 | 0.770525 | 16.2377  | 26.3747 No change |
| NM_054043    | Msi2          | 0.660629 | 1 | 0.749472 | 25.0315  | 40.0658 No change |
| NM_033320    | Glce          | 0.660855 | 1 | 0.824348 | 10.0961  | 17.028 No change  |
| NM_026732    | Mrpl14        | 0.660874 | 1 | 1.08933  | 10.3075  | 20.9943 No change |
| NM_022885    | Slc30a5       | 0.660923 | 1 | 0.798723 | 20.8706  | 34.5744 No change |
| NM_019568    | Cxcl14        | 0.661075 | 1 | 1.11385  | 2.97866  | 6.17599 No change |
| NM_016978    | Oat           | 0.6613   | 1 | 0.760693 | 59.9909  | 96.7762 No change |
| NM_008020    | Fkbp2         | 0.661607 | 1 | 0.86263  | 47.2916  | 81.9353 No change |
| NR_015566    | A330023F24Rik | 0.66165  | 1 | 0.841381 | 7.39188  | 12.617 No change  |
| NM_001167860 | Wipf3         | 0.661689 | 1 | 0.850243 | 8.27231  | 14.2079 No change |
| NM_008175    | Grn           | 0.661886 | 1 | 0.85381  | 14.3688  | 24.7407 No change |
| NM_001081145 | Tigd2         | 0.662123 | 1 | 0.899173 | 7.18484  | 12.7729 No change |
| NM_011882    | Rnasel        | 0.662289 | 1 | 0.919636 | 3.823    | 6.89543 No change |
| NM_206924    | Jtb           | 0.662351 | 1 | 0.942694 | 13.7743  | 25.2538 No change |
| NM_001035245 | Trpm3         | 0.662625 | 1 | 0.935354 | 9.88886  | 18.0359 No change |
| NM_024220    | Ndufc2        | 0.662697 | 1 | 0.886645 | 35.7164  | 62.9357 No change |
| NM_019833    | Fam69b        | 0.663077 | 1 | 1.0342   | 5.15607  | 10.0915 No change |
| NM_172380    | Poglut1       | 0.663114 | 1 | 0.861704 | 11.8222  | 20.469 No change  |
| NM_008251    | Hmgn1         | 0.663269 | 1 | 0.781035 | 76.1976  | 124.677 No change |

|                |               |          |   |          |          |         |           |
|----------------|---------------|----------|---|----------|----------|---------|-----------|
| NM_007910      | Efn4          | 0.663303 | 1 | 1.33625  | 1.39735  | 3.41862 | No change |
| NM_153103      | Kif1c         | 0.663364 | 1 | 0.825285 | 7.0373   | 11.8767 | No change |
| NM_175266      | Epm2aip1      | 0.664404 | 1 | 0.798544 | 9.66488  | 16.0086 | No change |
| NM_175654      | Hist1h4d      | 0.664838 | 1 | 0.855543 | 108.784  | 187.531 | No change |
| NM_026902      | Mcts1         | 0.664915 | 1 | 1.17089  | 4.85305  | 10.49   | No change |
| NM_001024139   | Adamts15      | 0.664917 | 1 | 0.923595 | 3.03319  | 5.48605 | No change |
| NM_021607      | Ncstn         | 0.665029 | 1 | 0.757846 | 51.9951  | 83.71   | No change |
| NM_183256      | 2310016M24Rik | 0.665064 | 1 | 0.941134 | 21.6887  | 39.7184 | No change |
| NM_145525      | Osbpl6        | 0.665178 | 1 | 0.963521 | 1.65543  | 3.0802  | No change |
| NM_019405      | Cetn2         | 0.66519  | 1 | 0.906661 | 17.5114  | 31.2951 | No change |
| NM_025446      | Aig1          | 0.665409 | 1 | 1.02674  | 8.39754  | 16.3471 | No change |
| NM_013725      | Rps11         | 0.665884 | 1 | 0.753162 | 279.351  | 448.276 | No change |
| NM_019447      | Hgfac         | 0.666198 | 1 | 0.946398 | 7.22447  | 13.2795 | No change |
| NM_025303      | Stau2         | 0.666393 | 1 | 0.92943  | 6.00469  | 10.9053 | No change |
| NM_001164216   | Romo1         | 0.666598 | 1 | 1.00618  | 22.3572  | 42.884  | No change |
| NM_027439      | Atp6ap2       | 0.666683 | 1 | 0.842769 | 16.8935  | 28.8619 | No change |
| NM_001198977   | Syk           | 0.666779 | 1 | 0.794185 | 15.2534  | 25.1881 | No change |
| NM_170779      | Wwc1          | 0.667053 | 1 | 0.843728 | 11.9834  | 20.487  | No change |
| NM_019868      | Hnrmp2        | 0.667395 | 1 | 0.822943 | 21.8454  | 36.8065 | No change |
| NM_026130      | Srpr          | 0.667497 | 1 | 0.776376 | 36.533   | 59.5811 | No change |
| NM_001001488   | Atp8b1        | 0.667676 | 1 | 0.853051 | 5.58409  | 9.60929 | No change |
| NM_001002786   | Rab44         | 0.667917 | 1 | 1.17     | 1.05261  | 2.27353 | No change |
| NM_011502      | Stx3          | 0.66802  | 1 | 0.950624 | 6.06765  | 11.1863 | No change |
| NM_172665      | Pdk1          | 0.668574 | 1 | 0.821026 | 10.4736  | 17.6228 | No change |
| NM_001081008   | Taf1          | 0.668605 | 1 | 0.831455 | 5.82792  | 9.87794 | No change |
| NM_178642      | Ano1          | 0.669217 | 1 | 0.773303 | 26.8356  | 43.6717 | No change |
| NM_030235      | Avl9          | 0.669616 | 1 | 0.79314  | 12.3741  | 20.4182 | No change |
| NM_025529      | Nudt8         | 0.669704 | 1 | 1.27986  | 3.54671  | 8.31168 | No change |
| NM_001001181   | BC031181      | 0.670128 | 1 | 0.840885 | 40.6709  | 69.3911 | No change |
| NM_144874      | Cox15         | 0.670296 | 1 | 0.812671 | 12.8986  | 21.5762 | No change |
| NM_026728      | Echdc2        | 0.67081  | 1 | 0.832914 | 37.0823  | 62.9154 | No change |
| NM_011213      | Ptprf         | 0.671426 | 1 | 0.766449 | 18.4712  | 29.916  | No change |
| NM_001145974   | Elov4         | 0.671455 | 1 | 0.887003 | 8.78443  | 15.4815 | No change |
| NM_025323      | O610009D07Rik | 0.672345 | 1 | 1.00843  | 9.24243  | 17.7548 | No change |
| NM_172588      | Serinc5       | 0.672488 | 1 | 0.809441 | 12.594   | 21.0189 | No change |
| NM_008528      | Bink          | 0.672688 | 1 | 0.969269 | 6.41428  | 11.9823 | No change |
| NM_177260      | Tmem154       | 0.673026 | 1 | 0.947076 | 4.75463  | 8.74295 | No change |
| NM_172404      | Ccbl1         | 0.67332  | 1 | 0.855675 | 19.3068  | 33.2835 | No change |
| NM_173774      | Slc45a1       | 0.673395 | 1 | 1.38516  | 0.761374 | 1.93273 | No change |
| NM_026329      | Polr2g        | 0.673396 | 1 | 0.847858 | 46.8902  | 80.3927 | No change |
| NM_029988      | Pigh          | 0.67358  | 1 | 0.882763 | 11.8872  | 20.8869 | No change |
| NM_026752      | Zfyve21       | 0.673764 | 1 | 0.907578 | 16.9178  | 30.2509 | No change |
| NM_026878      | Rasl11b       | 0.673952 | 1 | 1.04171  | 4.80913  | 9.46114 | No change |
| NM_008828      | Pgk1          | 0.674368 | 1 | 0.846955 | 23.102   | 39.5827 | No change |
| NM_011220      | Pts           | 0.674377 | 1 | 0.928089 | 18.0287  | 32.7079 | No change |
| NM_011399      | Slc25a17      | 0.674476 | 1 | 0.883385 | 16.8066  | 29.5433 | No change |
| NM_009120      | Sar1a         | 0.674635 | 1 | 0.800051 | 30.802   | 51.0704 | No change |
| NM_019490      | Uso1          | 0.675274 | 1 | 0.861509 | 9.11837  | 15.7837 | No change |
| NM_001161712   | Gcat          | 0.675301 | 1 | 1.24314  | 1.85795  | 4.23498 | No change |
| NM_145609      | 8430410K20Rik | 0.675463 | 1 | 0.85392  | 14.183   | 24.4199 | No change |
| NM_199476      | Rrm2b         | 0.675609 | 1 | 0.886001 | 6.11667  | 10.7718 | No change |
| NM_009761      | Bnip3l        | 0.675933 | 1 | 0.793016 | 28.4843  | 46.9957 | No change |
| NM_001081226   | 2310009B15Rik | 0.675941 | 1 | 1.37689  | 3.53957  | 8.92672 | No change |
| NM_144549      | Trib1         | 0.675956 | 1 | 0.912569 | 5.36632  | 9.62919 | No change |
| NM_030063      | Acbd7         | 0.676033 | 1 | 1.21882  | 6.77389  | 15.1633 | No change |
| NM_053257      | Rpl3l         | 0.676055 | 1 | 0.871991 | 30.7883  | 53.6878 | No change |
| NM_029011      | Pyroxd2       | 0.676258 | 1 | 0.884619 | 9.02724  | 15.8819 | No change |
| NM_023231      | Stoml2        | 0.676456 | 1 | 0.910184 | 14.3168  | 25.6463 | No change |
| NM_001166503   | Slc39a11      | 0.676468 | 1 | 0.892421 | 9.53131  | 16.8612 | No change |
| NM_009720      | Atox1         | 0.676741 | 1 | 0.829898 | 121.406  | 205.539 | No change |
| NM_001122758   | Pcdh7         | 0.67675  | 1 | 0.919807 | 2.63791  | 4.75762 | No change |
| NM_025745      | Erlec1        | 0.676876 | 1 | 0.830226 | 15.1489  | 25.6528 | No change |
| NM_021458      | Fzd3          | 0.676942 | 1 | 0.82464  | 4.49597  | 7.58363 | No change |
| NM_145544      | Rap1gds1      | 0.677186 | 1 | 0.881194 | 8.36474  | 14.6808 | No change |
| NM_020259      | Hhip          | 0.677224 | 1 | 0.945056 | 1.83483  | 3.36891 | No change |
| NM_026767      | Dpm3          | 0.67768  | 1 | 0.957453 | 37.6066  | 69.6586 | No change |
| NM_007755      | Cpeb1         | 0.67816  | 1 | 0.924821 | 7.57764  | 13.715  | No change |
| NR_003964      | Tubb2a-ps2    | 0.678267 | 1 | 1.24061  | 4.75179  | 10.8094 | No change |
| NM_007974      | F2rl1         | 0.678348 | 1 | 1.0473   | 3.0587   | 6.04117 | No change |
| NM_183161      | Slc17a9       | 0.678452 | 1 | 0.864257 | 16.2416  | 28.1674 | No change |
| NM_001083955_2 | Hba-a2        | 0.678585 | 1 | 1.12263  | 10.0269  | 20.9125 | No change |
| NM_145583      | Pgap2         | 0.678602 | 1 | 0.793907 | 81.1102  | 133.904 | No change |
| NM_025647      | Cmpk1         | 0.678656 | 1 | 0.858133 | 20.3889  | 35.2081 | No change |
| NM_001136556   | Fer1l4        | 0.679023 | 1 | 1.05677  | 1.31281  | 2.61058 | No change |
| NM_175274      | Ttyh3         | 0.679181 | 1 | 0.860406 | 8.06451  | 13.9482 | No change |
| NM_198295      | Tmx3          | 0.679711 | 1 | 0.876589 | 6.86198  | 12.0041 | No change |

|              |               |          |   |          |         |         |           |
|--------------|---------------|----------|---|----------|---------|---------|-----------|
| NM_026013    | Dram2         | 0.679746 | 1 | 0.987591 | 5.64649 | 10.6853 | No change |
| NM_001161620 | Mpp7          | 0.679922 | 1 | 0.942486 | 9.72187 | 17.817  | No change |
| NM_176940    | Nwd1          | 0.679926 | 1 | 1.03927  | 1.15523 | 2.26845 | No change |
| NM_025378    | Ifitm3        | 0.680092 | 1 | 0.853251 | 63.6701 | 109.57  | No change |
| NM_011694    | Vdac1         | 0.680509 | 1 | 0.831579 | 30.9396 | 52.4407 | No change |
| NM_025574    | Pigy          | 0.680974 | 1 | 0.918531 | 3.95485 | 7.12602 | No change |
| NM_031258    | Chrdl1        | 0.681203 | 1 | 0.886276 | 6.93603 | 12.2165 | No change |
| NM_023217    | Pgpep1        | 0.681228 | 1 | 0.872847 | 15.5594 | 27.147  | No change |
| NM_026398    | Pop5          | 0.681355 | 1 | 0.988324 | 12.6138 | 23.8819 | No change |
| NM_009902    | Cldn3         | 0.681367 | 1 | 0.824076 | 48.614  | 81.9656 | No change |
| NM_026455    | Fam32a        | 0.681498 | 1 | 0.865668 | 18.9016 | 32.8123 | No change |
| NM_025791    | Tmem223       | 0.681678 | 1 | 1.00625  | 14.8144 | 28.4093 | No change |
| NM_009874    | Cdk7          | 0.681689 | 1 | 0.837447 | 6.75188 | 11.4911 | No change |
| NM_153548    | E430025E21Rik | 0.681689 | 1 | 0.837447 | 12.7661 | 21.7267 | No change |
| NM_001142950 | Nars          | 0.682032 | 1 | 0.792289 | 39.2647 | 64.7473 | No change |
| NM_026428    | Dcxr          | 0.682765 | 1 | 0.914217 | 24.5975 | 44.1851 | No change |
| NR_038063    | Rplp2-ps1     | 0.682796 | 1 | 0.780087 | 162.701 | 266.018 | No change |
| NM_007386    | Aco1          | 0.683167 | 1 | 0.813769 | 17.04   | 28.5236 | No change |
| NM_023214    | Slc30a7       | 0.683267 | 1 | 0.816934 | 7.78058 | 13.0529 | No change |
| NM_009705    | Arg2          | 0.683401 | 1 | 1.00694  | 7.86935 | 15.0979 | No change |
| NM_024236    | Qdpr          | 0.683933 | 1 | 0.857143 | 29.547  | 50.985  | No change |
| NM_028758    | Gga2          | 0.684471 | 1 | 0.819698 | 14.007  | 23.5438 | No change |
| NM_146094    | Fads1         | 0.684795 | 1 | 0.784266 | 37.0836 | 60.8085 | No change |
| NM_020003    | O610031J06Rik | 0.684908 | 1 | 0.890593 | 18.7722 | 33.163  | No change |
| NM_001163136 | Macc1         | 0.685033 | 1 | 1.02271  | 2.66645 | 5.17362 | No change |
| NM_010306    | Gnai3         | 0.68507  | 1 | 0.776995 | 46.8816 | 76.4861 | No change |
| NM_026485    | Trabd         | 0.685202 | 1 | 0.854539 | 18.0804 | 31.1415 | No change |
| NM_013649    | Ryk           | 0.685203 | 1 | 0.90174  | 7.93565 | 14.1297 | No change |
| NM_028203    | Wdr89         | 0.685348 | 1 | 0.781172 | 46.4074 | 75.9332 | No change |
| NM_007488    | Arnt2         | 0.686525 | 1 | 0.842181 | 8.56327 | 14.6219 | No change |
| NM_011040    | Pax8          | 0.686575 | 1 | 0.820964 | 27.4414 | 46.1655 | No change |
| NM_008591    | Met           | 0.686739 | 1 | 0.92121  | 3.30025 | 5.9574  | No change |
| NM_178745    | Tmem229b      | 0.687462 | 1 | 0.912221 | 6.20294 | 11.1262 | No change |
| NM_022324    | Sdf2l1        | 0.687715 | 1 | 0.832481 | 53.7164 | 91.0994 | No change |
| NM_007440    | Alox12        | 0.687775 | 1 | 0.945669 | 6.01163 | 11.0411 | No change |
| NM_133768    | Asl           | 0.687927 | 1 | 0.846733 | 32.18   | 55.1227 | No change |
| NM_019424    | Hps1          | 0.687961 | 1 | 0.974957 | 5.21305 | 9.77546 | No change |
| NR_002885    | Gm10052       | 0.688086 | 1 | 0.841992 | 37.8089 | 64.5498 | No change |
| NM_172840    | Vwa2          | 0.688455 | 1 | 1.01764  | 2.76474 | 5.34456 | No change |
| NM_025558    | Cyb5b         | 0.688831 | 1 | 0.762302 | 55.183  | 89.1118 | No change |
| NM_144797    | Metrl         | 0.688872 | 1 | 1.0308   | 4.00989 | 7.82487 | No change |
| NM_183019    | Arhgef4       | 0.689307 | 1 | 1.03819  | 3.49235 | 6.85109 | No change |
| NM_008413    | Jak2          | 0.689503 | 1 | 0.871133 | 7.41267 | 12.9167 | No change |
| NM_023737    | Ehhadh        | 0.689624 | 1 | 0.973956 | 4.8623  | 9.11101 | No change |
| NM_011851    | Nt5e          | 0.689637 | 1 | 0.862432 | 11.5441 | 19.9932 | No change |
| NM_001164256 | Tpm1          | 0.689894 | 1 | 0.820255 | 47.5711 | 79.989  | No change |
| NM_001164661 | Cyfp1         | 0.689958 | 1 | 0.855718 | 6.90093 | 11.8955 | No change |
| NM_025902    | Cisd2         | 0.690026 | 1 | 0.880085 | 11.8301 | 20.7441 | No change |
| NM_001177967 | Lclat1        | 0.690314 | 1 | 0.833806 | 13.6005 | 23.0866 | No change |
| NM_013555    | Hoxd9         | 0.690316 | 1 | 0.9799   | 6.7038  | 12.6147 | No change |
| NM_153194    | Zfp740        | 0.690931 | 1 | 0.843988 | 14.1998 | 24.2763 | No change |
| NM_028763    | Cbx6          | 0.691023 | 1 | 0.87722  | 6.49734 | 11.3701 | No change |
| NM_011197    | Ptgrn         | 0.691119 | 1 | 0.893139 | 5.16735 | 9.14448 | No change |
| NM_001110233 | Ngfrap1       | 0.691864 | 1 | 0.924416 | 23.9033 | 43.2439 | No change |
| NM_133977    | Trf           | 0.692389 | 1 | 0.82217  | 31.8878 | 53.6893 | No change |
| NM_008303    | Hspe1         | 0.692728 | 1 | 0.943601 | 24.7737 | 45.4302 | No change |
| NM_146131    | Pbxip1        | 0.692731 | 1 | 0.848463 | 11.4159 | 19.5779 | No change |
| NM_028303    | Pdzd11        | 0.69283  | 1 | 0.963914 | 15.9298 | 29.6359 | No change |
| NM_013535    | Grcc10        | 0.693133 | 1 | 0.842834 | 97.8405 | 167.132 | No change |
| NM_025596    | Preld1        | 0.693448 | 1 | 0.871321 | 35.7104 | 62.232  | No change |
| NR_030730    | Gm3428        | 0.693791 | 1 | 0.991753 | 25.4159 | 48.2281 | No change |
| NM_029572    | Erp44         | 0.693895 | 1 | 0.81809  | 30.726  | 51.5854 | No change |
| NM_009984    | Ctsl          | 0.693928 | 1 | 0.747429 | 227.996 | 364.382 | No change |
| NM_175090    | Slc31a1       | 0.694125 | 1 | 0.827273 | 18.8379 | 31.8304 | No change |
| NM_001083891 | Ndufv3        | 0.694244 | 1 | 0.95732  | 35.3473 | 65.4521 | No change |
| NM_010150    | Nr2f6         | 0.694368 | 1 | 0.963204 | 7.41548 | 13.7885 | No change |
| NM_011946    | Map3k2        | 0.694654 | 1 | 0.824574 | 6.87177 | 11.5893 | No change |
| NM_031869    | Prkab1        | 0.695118 | 1 | 0.93719  | 9.99011 | 18.2365 | No change |
| NM_016696    | Gpc1          | 0.695473 | 1 | 0.852826 | 14.0877 | 24.2335 | No change |
| NM_029565    | Tmem59        | 0.695655 | 1 | 0.826643 | 47.2143 | 79.7419 | No change |
| NM_023842    | Dsp           | 0.696276 | 1 | 0.783228 | 17.5177 | 28.7029 | No change |
| NM_176838    | Esrp2         | 0.696475 | 1 | 0.871708 | 14.9975 | 26.1424 | No change |
| NM_011631    | Hsp90b1       | 0.696535 | 1 | 0.72521  | 571.437 | 899.274 | No change |
| NM_008744    | Ntn1          | 0.696797 | 1 | 0.889183 | 5.75714 | 10.1593 | No change |
| NM_008097    | Gcdh          | 0.696806 | 1 | 0.884472 | 15.9746 | 28.0964 | No change |
| NM_018754    | Sfn           | 0.696894 | 1 | 0.988983 | 8.55499 | 16.2008 | No change |

|              |               |          |   |          |          |         |           |
|--------------|---------------|----------|---|----------|----------|---------|-----------|
| NM_009213    | Smpd2         | 0.697035 | 1 | 0.942668 | 12.3986  | 22.7204 | No change |
| NM_026998    | Snx6          | 0.697382 | 1 | 0.841712 | 31.7865  | 54.254  | No change |
| NM_019953    | Cnpy2         | 0.697864 | 1 | 0.966579 | 16.1726  | 30.1423 | No change |
| NM_133684    | Mosc2         | 0.698036 | 1 | 0.817084 | 47.0418  | 78.9205 | No change |
| NM_021550    | C1galt1c1     | 0.698401 | 1 | 0.987678 | 9.34172  | 17.6738 | No change |
| NM_027992    | Tmem106b      | 0.698777 | 1 | 0.810675 | 16.5237  | 27.5974 | No change |
| NM_001190297 | Gpr155        | 0.698992 | 1 | 0.840735 | 12.6805  | 21.6284 | No change |
| NM_145839    | Rasgef1b      | 0.699061 | 1 | 0.868482 | 14.3294  | 24.9208 | No change |
| NM_029999    | Lbh           | 0.699147 | 1 | 0.925459 | 7.67804  | 13.8996 | No change |
| NM_008133    | Glud1         | 0.699316 | 1 | 0.898231 | 9.75436  | 17.3226 | No change |
| NM_008516    | Lrrn1         | 0.699344 | 1 | 1.14992  | 1.4473   | 3.0773  | No change |
| NM_019776    | Snd1          | 0.699485 | 1 | 0.842241 | 17.5333  | 29.937  | No change |
| NM_001109993 | Tmem141       | 0.69953  | 1 | 0.964477 | 16.0525  | 29.8732 | No change |
| NM_007452    | Prdx3         | 0.699576 | 1 | 0.835066 | 47.0246  | 79.8892 | No change |
| NM_010288    | Gja1          | 0.700048 | 1 | 0.779382 | 65.1141  | 106.403 | No change |
| NM_134017    | Mat2b         | 0.70008  | 1 | 0.875824 | 21.4295  | 37.4612 | No change |
| NM_184053    | Calu          | 0.7008   | 1 | 0.810381 | 32.5927  | 54.4236 | No change |
| NM_172371    | Slc16a13      | 0.70106  | 1 | 0.93195  | 8.93216  | 16.2438 | No change |
| NM_019969    | Plag1         | 0.70117  | 1 | 1.01402  | 2.5712   | 4.95644 | No change |
| NM_126166    | Tlr3          | 0.701224 | 1 | 1.08738  | 1.75561  | 3.56715 | No change |
| NM_019552    | Abcb10        | 0.701355 | 1 | 0.90131  | 7.07288  | 12.5876 | No change |
| NM_016965    | Nckap1        | 0.701629 | 1 | 0.789844 | 48.1081  | 79.1884 | No change |
| NM_024169    | Fkbp11        | 0.701797 | 1 | 0.978291 | 21.0215  | 39.5045 | No change |
| NM_001077411 | Gba           | 0.702256 | 1 | 0.926576 | 13.4763  | 24.4146 | No change |
| NM_145937    | Sumf1         | 0.702534 | 1 | 0.885507 | 14.0672  | 24.7584 | No change |
| NM_015784    | Postn         | 0.702975 | 1 | 0.912858 | 8.56525  | 15.3678 | No change |
| NM_144848    | Eppk1         | 0.70312  | 1 | 0.761082 | 30.9363  | 49.9129 | No change |
| NM_028058    | Fundc1        | 0.703511 | 1 | 0.90167  | 15.9043  | 28.3114 | No change |
| NM_029384    | 2210411K11Rik | 0.70394  | 1 | 1.63742  | 0.994666 | 3.07383 | No change |
| NM_001098227 | Sdcbp         | 0.704512 | 1 | 0.816133 | 39.5009  | 66.2232 | No change |
| NM_198167    | Tmem63b       | 0.704654 | 1 | 0.924061 | 7.75084  | 14.0166 | No change |
| NR_002142    | Rpph1         | 0.704776 | 1 | 0.729529 | 6953.93  | 10976.2 | No change |
| NM_019793    | Tspan3        | 0.704886 | 1 | 0.795158 | 89.8471  | 148.44  | No change |
| NM_011981    | Zfp260        | 0.704939 | 1 | 0.878664 | 10.9528  | 19.1842 | No change |
| NM_008604    | Mme           | 0.70496  | 1 | 0.92121  | 6.09813  | 11.0057 | No change |
| NM_175194    | Slc25a16      | 0.705208 | 1 | 0.94018  | 6.9227   | 12.6623 | No change |
| NM_009083    | Rpl30         | 0.705474 | 1 | 0.897248 | 57.6936  | 102.38  | No change |
| NM_029631    | Abhd14b       | 0.705833 | 1 | 0.87968  | 27.5464  | 48.2825 | No change |
| NM_172416    | Ostm1         | 0.706044 | 1 | 0.908576 | 9.84364  | 17.6078 | No change |
| NM_010121    | Eif2ak3       | 0.707024 | 1 | 0.934722 | 5.16187  | 9.405   | No change |
| NM_008276    | Hoxd8         | 0.707035 | 1 | 0.848239 | 43.7539  | 75.0175 | No change |
| NM_009197    | Slc16a2       | 0.70704  | 1 | 0.915545 | 6.70608  | 12.0544 | No change |
| NM_145625    | Eif4b         | 0.707587 | 1 | 0.789531 | 49.0238  | 80.6764 | No change |
| NM_054097    | Pip4k2c       | 0.707611 | 1 | 0.826228 | 26.3776  | 44.5342 | No change |
| NM_008063    | Slc37a4       | 0.708112 | 1 | 0.886254 | 18.5179  | 32.6072 | No change |
| NM_008402    | Itgav         | 0.708112 | 1 | 0.886254 | 5.47347  | 9.63794 | No change |
| NM_025344    | Eif3f         | 0.7082   | 1 | 0.934562 | 15.585   | 28.3924 | No change |
| NM_008448    | Kif5b         | 0.708255 | 1 | 0.78647  | 34.4304  | 56.5399 | No change |
| NM_139272    | Galnt2        | 0.708296 | 1 | 0.858895 | 13.2773  | 22.9347 | No change |
| NM_008132    | Glrp1         | 0.708754 | 1 | 1.1588   | 2.77775  | 5.94284 | No change |
| NM_026497    | Nudt12        | 0.709039 | 1 | 1.02243  | 5.1964   | 10.0759 | No change |
| NM_178615    | Rgmb          | 0.709065 | 1 | 0.994616 | 5.47909  | 10.4156 | No change |
| NM_031176    | Tnxb          | 0.709112 | 1 | 0.987131 | 1.59502  | 3.01599 | No change |
| NM_026020    | Rplp2         | 0.709121 | 1 | 0.998675 | 31.7648  | 60.5584 | No change |
| NM_008557    | Fxyd3         | 0.709584 | 1 | 1.0283   | 21.8123  | 42.4718 | No change |
| NM_001163567 | Fam102b       | 0.709744 | 1 | 0.876451 | 7.76131  | 13.5725 | No change |
| NM_145453    | Zcchc9        | 0.709987 | 1 | 1.04443  | 6.73274  | 13.2616 | No change |
| NM_015754    | Rbbp9         | 0.710341 | 1 | 0.993265 | 6.80797  | 12.929  | No change |
| NM_011295    | Rps12         | 0.710358 | 1 | 0.98773  | 29.5993  | 55.9914 | No change |
| NM_010380    | H2-D1         | 0.710691 | 1 | 0.797191 | 97.4336  | 161.199 | No change |
| NM_007956    | Esr1          | 0.710922 | 1 | 0.909532 | 7.13227  | 12.7658 | No change |
| NM_009846    | Cd24a         | 0.711117 | 1 | 0.805903 | 77.33    | 128.718 | No change |
| NM_027168    | Hddc2         | 0.71167  | 1 | 1.26161  | 4.85327  | 11.1986 | No change |
| NM_026871    | Hint2         | 0.711689 | 1 | 0.997797 | 24.2923  | 46.2815 | No change |
| NM_009758    | Bmpr1a        | 0.711934 | 1 | 0.815145 | 21.5398  | 36.0854 | No change |
| NM_175002    | Mmgt2         | 0.712056 | 1 | 0.939604 | 12.3249  | 22.5324 | No change |
| NM_001081356 | Vma21         | 0.712084 | 1 | 0.9483   | 5.14265  | 9.45976 | No change |
| NM_031880    | Tnk1          | 0.712263 | 1 | 0.97125  | 5.49752  | 10.2781 | No change |
| NM_001172062 | Lman1         | 0.712346 | 1 | 0.86249  | 31.4858  | 54.5232 | No change |
| NM_011289    | Rpl27         | 0.712417 | 1 | 0.85306  | 85.4546  | 147.005 | No change |
| NM_153558    | Lcn13         | 0.71256  | 1 | 1.11385  | 9.77461  | 20.2384 | No change |
| NM_133739    | Tmem123       | 0.712889 | 1 | 0.837922 | 27.8043  | 47.327  | No change |
| NM_008580    | Map3k5        | 0.712966 | 1 | 0.963612 | 3.51502  | 6.53613 | No change |
| NM_025988    | Acbd4         | 0.713094 | 1 | 1.07354  | 4.22992  | 8.50702 | No change |
| NM_173385    | Cilp          | 0.713547 | 1 | 0.91542  | 7.16564  | 12.8785 | No change |
| NM_019807    | Acpp          | 0.713745 | 1 | 1.03889  | 4.10266  | 8.04856 | No change |

|                |               |          |   |          |          |         |           |
|----------------|---------------|----------|---|----------|----------|---------|-----------|
| NM_023733      | Crot          | 0.713991 | 1 | 0.862189 | 20.0899  | 34.7814 | No change |
| NM_026034      | Armc10        | 0.714067 | 1 | 0.982756 | 8.132    | 15.3278 | No change |
| NM_025582      | 2810405K02Rik | 0.714255 | 1 | 1.12912  | 8.25662  | 17.2847 | No change |
| NM_008485      | Lamc2         | 0.714726 | 1 | 0.923269 | 5.38487  | 9.73154 | No change |
| NM_009853      | Cd68          | 0.715008 | 1 | 1.18142  | 4.97807  | 10.8256 | No change |
| NM_027978      | Coq2          | 0.715063 | 1 | 0.964763 | 11.1541  | 20.7573 | No change |
| NM_026170      | Ergic1        | 0.715389 | 1 | 0.837745 | 30.4986  | 51.9059 | No change |
| NM_001009949   | Mcart1        | 0.715547 | 1 | 0.888597 | 9.22014  | 16.261  | No change |
| NR_027492      | Hspa13        | 0.715638 | 1 | 0.822419 | 26.4468  | 44.5308 | No change |
| NM_026163      | Pkp2          | 0.715717 | 1 | 0.970327 | 6.3401   | 11.8451 | No change |
| NM_008394      | Irf9          | 0.715924 | 1 | 0.930474 | 10.6566  | 19.3564 | No change |
| NM_001033208   | Gcom1         | 0.715997 | 1 | 0.944749 | 10.0434  | 18.4273 | No change |
| NM_080554      | Psmc5         | 0.716244 | 1 | 0.896574 | 18.3959  | 32.6259 | No change |
| NM_177353      | Slc9a7        | 0.716306 | 1 | 1.03659  | 4.57281  | 8.9557  | No change |
| NM_001163223   | Zfp804b       | 0.716377 | 1 | 1.13744  | 1.55565  | 3.27618 | No change |
| NM_007409      | Adh1          | 0.716586 | 1 | 0.974942 | 13.3221  | 24.9708 | No change |
| NM_024465      | Abhd12        | 0.717109 | 1 | 0.812614 | 70.189   | 117.377 | No change |
| NM_001199349   | Cd99l2        | 0.717599 | 1 | 0.898386 | 10.3765  | 18.4263 | No change |
| NM_027395      | Basp1         | 0.717678 | 1 | 0.867993 | 29.4551  | 51.2019 | No change |
| NM_023580      | Epha1         | 0.717682 | 1 | 1.01325  | 4.08831  | 7.87441 | No change |
| NM_001033344   | Dusp27        | 0.717724 | 1 | 1.33109  | 0.675286 | 1.64094 | No change |
| NR_028405      | Marcks1-ps4   | 0.717816 | 1 | 1.4258   | 1.87095  | 4.88702 | No change |
| NM_172921      | Fam55d        | 0.718152 | 1 | 1.05767  | 3.1409   | 6.24466 | No change |
| NM_001166065   | Gcnt4         | 0.718231 | 1 | 0.825008 | 21.585   | 36.4098 | No change |
| NR_028101      | Gm12191       | 0.718265 | 1 | 0.910692 | 68.6723  | 123.006 | No change |
| NM_001080126   | Casp8         | 0.718422 | 1 | 1.02075  | 5.28765  | 10.3062 | No change |
| NM_001002268   | Gpr126        | 0.719001 | 1 | 0.924716 | 4.39264  | 7.94612 | No change |
| NM_172778      | Maob          | 0.719247 | 1 | 0.965825 | 8.11929  | 15.1202 | No change |
| NM_022305      | B4galt1       | 0.719345 | 1 | 0.837686 | 22.4188  | 38.1525 | No change |
| NM_001099327   | Gm14305       | 0.719396 | 1 | 0.919318 | 18.7023  | 33.7032 | No change |
| NM_001012310   | Slc25a47      | 0.719723 | 1 | 0.960232 | 13.0564  | 24.2181 | No change |
| NM_013647      | Rps16         | 0.719795 | 1 | 0.866474 | 93.3772  | 162.143 | No change |
| NM_011770      | Ikzf2         | 0.719901 | 1 | 0.990583 | 1.70885  | 3.23863 | No change |
| NM_007798      | Ctsb          | 0.719997 | 1 | 0.814624 | 29.6688  | 49.684  | No change |
| NM_198105      | Fam120c       | 0.720165 | 1 | 0.892682 | 5.33526  | 9.43613 | No change |
| NM_001177406_2 | Gm14431       | 0.720734 | 1 | 0.887838 | 12.2439  | 21.5813 | No change |
| NM_001177407_2 | Gm8898        | 0.720734 | 1 | 0.887838 | 12.2439  | 21.5813 | No change |
| NM_009794      | Capn2         | 0.72091  | 1 | 0.905144 | 11.269   | 20.106  | No change |
| NM_146102      | Afap1l2       | 0.7211   | 1 | 0.956671 | 5.35566  | 9.90898 | No change |
| NM_016738      | Rpl13         | 0.721831 | 1 | 0.826903 | 145.925  | 246.47  | No change |
| NM_008218      | Hba-a1        | 0.724143 | 1 | 1.13646  | 11.7194  | 24.6581 | No change |
| NM_007450      | Slc25a4       | 0.72435  | 1 | 0.847163 | 74.8109  | 128.156 | No change |
| NM_020606      | Parva         | 0.724362 | 1 | 0.893215 | 9.64738  | 17.0685 | No change |
| NM_153459      | Dusp7         | 0.72439  | 1 | 1.05205  | 3.34144  | 6.61586 | No change |
| NM_172772      | Fam63b        | 0.724685 | 1 | 0.85082  | 9.66784  | 16.604  | No change |
| NM_018881      | Fmo2          | 0.72469  | 1 | 0.92403  | 9.12944  | 16.5059 | No change |
| NM_146106      | Lyplal1       | 0.724838 | 1 | 0.939138 | 16.6167  | 30.3643 | No change |
| NM_001162926   | Fam84b        | 0.724855 | 1 | 0.87126  | 10.3481  | 18.0284 | No change |
| NM_008991      | Abcd3         | 0.724876 | 1 | 0.838166 | 28.6235  | 48.7266 | No change |
| NM_009672      | Anp32a        | 0.725114 | 1 | 0.93413  | 13.2113  | 24.0563 | No change |
| NM_011727      | Xlr3c         | 0.725564 | 1 | 1.22404  | 2.72788  | 6.11855 | No change |
| NM_011185      | Psemb1        | 0.72571  | 1 | 0.840948 | 90.6815  | 154.669 | No change |
| NM_025681      | Lix1          | 0.725718 | 1 | 1.12821  | 2.22424  | 4.65183 | No change |
| NM_001163187   | Plekhhb1      | 0.725851 | 1 | 1.05245  | 5.998    | 11.8788 | No change |
| NM_009416      | Tpm2          | 0.72592  | 1 | 0.956399 | 10.7297  | 19.8469 | No change |
| NM_173021      | Phka1         | 0.725926 | 1 | 0.901815 | 6.64301  | 11.8241 | No change |
| NM_175245      | Mzt1          | 0.726202 | 1 | 0.897043 | 18.5662  | 32.936  | No change |
| NM_001110504   | Capn1         | 0.726562 | 1 | 0.87505  | 18.3318  | 32.0222 | No change |
| NM_027769      | Cpne3         | 0.726844 | 1 | 0.854229 | 13.5535  | 23.3327 | No change |
| NM_018775      | Tbc1d8        | 0.726864 | 1 | 0.817962 | 34.1555  | 57.3292 | No change |
| NM_001081032   | Gm8909        | 0.726926 | 1 | 1.24456  | 2.92741  | 6.66593 | No change |
| NM_175543      | Rab11fip4     | 0.727004 | 1 | 0.871837 | 18.703   | 32.597  | No change |
| NM_025982      | Tspan31       | 0.727025 | 1 | 0.909407 | 23.7128  | 42.4325 | No change |
| NM_009084      | Rpl37a        | 0.727086 | 1 | 0.848902 | 142.586  | 244.553 | No change |
| NM_145517      | Ormdl1        | 0.727097 | 1 | 0.980413 | 10.0047  | 18.8228 | No change |
| NM_001163630   | Satb1         | 0.727309 | 1 | 1.05996  | 1.64126  | 3.26787 | No change |
| NM_012006      | Acot1         | 0.727309 | 1 | 1.05996  | 6.66511  | 13.2707 | No change |
| NM_009481      | Usp9x         | 0.728198 | 1 | 0.781638 | 37.4873  | 61.3499 | No change |
| NM_001161373   | F8            | 0.728205 | 1 | 0.983794 | 2.48323  | 4.68309 | No change |
| NM_025641      | Uqcrh         | 0.728461 | 1 | 0.832596 | 211.376  | 358.429 | No change |
| NM_011925      | Cd97          | 0.728512 | 1 | 0.851308 | 25.3448  | 43.5424 | No change |
| NM_175484      | Coro2b        | 0.728518 | 1 | 1.08562  | 2.47111  | 5.01145 | No change |
| NM_001163592   | Nhsl1         | 0.728528 | 1 | 0.838348 | 15.2367  | 25.9407 | No change |
| NM_010239      | Fth1          | 0.728656 | 1 | 0.835652 | 126.107  | 214.295 | No change |
| NM_016667      | Sntb1         | 0.728992 | 1 | 1.18882  | 2.39539  | 5.23511 | No change |
| NM_010559      | Il6ra         | 0.729061 | 1 | 1.11385  | 2.27237  | 4.70303 | No change |

|              |           |          |   |          |          |         |           |
|--------------|-----------|----------|---|----------|----------|---------|-----------|
| NR_033639    | Rps19-ps3 | 0.729243 | 1 | 0.961349 | 52.0243  | 96.5639 | No change |
| NM_133974    | Cdcp1     | 0.729723 | 1 | 0.915496 | 9.14392  | 16.4323 | No change |
| NM_001177471 | Gm15056   | 0.729813 | 1 | 1.03813  | 38.8416  | 76.135  | No change |
| NM_025635    | Zwint     | 0.73019  | 1 | 0.93072  | 11.2248  | 20.3891 | No change |
| NM_019671    | Net1      | 0.730866 | 1 | 0.873983 | 17.4535  | 30.4643 | No change |
| NM_001101507 | Clec2l    | 0.731067 | 1 | 1.06461  | 7.22308  | 14.4286 | No change |
| NM_009847    | Cd2ap     | 0.731137 | 1 | 0.842244 | 18.7173  | 31.9529 | No change |
| NM_001042660 | Smad7     | 0.731393 | 1 | 1.30073  | 0.721881 | 1.71354 | No change |
| NM_011063    | Pea15a    | 0.731471 | 1 | 0.851284 | 34.9731  | 60.0818 | No change |
| NM_146033    | Ankmy2    | 0.731529 | 1 | 0.989866 | 7.23712  | 13.7066 | No change |
| NM_001033416 | Gal3st4   | 0.731718 | 1 | 0.906725 | 12.5853  | 22.4772 | No change |
| NM_009484    | Uty       | 0.731817 | 1 | 0.889263 | 9.4648   | 16.6981 | No change |
| NM_008051    | Fut1      | 0.731836 | 1 | 0.976351 | 7.70461  | 14.4529 | No change |
| NM_174868    | Fam73a    | 0.73186  | 1 | 0.888449 | 9.3462   | 16.4795 | No change |
| NM_001146351 | Ephb6     | 0.731872 | 1 | 0.977625 | 5.22697  | 9.81398 | No change |
| NM_010595    | Kcna1     | 0.73203  | 1 | 0.908991 | 4.33541  | 7.75535 | No change |
| NM_008425    | Kcnj2     | 0.732046 | 1 | 1.08143  | 1.71418  | 3.46568 | No change |
| NM_008270    | Hoxb9     | 0.732168 | 1 | 0.956233 | 8.83104  | 16.3318 | No change |
| NM_008525    | Alad      | 0.732313 | 1 | 0.864335 | 52.6053  | 91.2011 | No change |
| NM_198899    | Uggt1     | 0.732314 | 1 | 0.801621 | 29.1847  | 48.4305 | No change |
| NM_145380    | Eif3m     | 0.732448 | 1 | 0.880016 | 45.9894  | 80.6115 | No change |
| NM_001110193 | Inpp5d    | 0.73255  | 1 | 0.881739 | 11.6228  | 20.3974 | No change |
| NM_133352    | Tm9sf3    | 0.732878 | 1 | 0.794116 | 55.0828  | 90.9306 | No change |
| NM_028922    | Ppapdc2   | 0.732901 | 1 | 0.862155 | 25.7298  | 44.5393 | No change |
| NM_001001491 | Tpm4      | 0.733347 | 1 | 0.89012  | 23.9674  | 42.3091 | No change |
| NM_011207    | Ptpn3     | 0.733516 | 1 | 0.864026 | 11.4131  | 19.7823 | No change |
| NM_181796    | Gstp2     | 0.73364  | 1 | 0.913556 | 49.9528  | 89.6432 | No change |
| NM_010575    | Itga2b    | 0.734123 | 1 | 1.11385  | 2.27105  | 4.69973 | No change |
| NM_007510    | Atp6v1e1  | 0.734217 | 1 | 0.849322 | 78.0283  | 133.863 | No change |
| NM_010330    | Emb       | 0.734234 | 1 | 0.891631 | 18.8718  | 33.3491 | No change |
| NM_133994    | Gstt3     | 0.734646 | 1 | 0.855799 | 45.172   | 77.847  | No change |
| NM_015732    | Axin2     | 0.735204 | 1 | 0.987345 | 4.37013  | 8.26153 | No change |
| NM_007506    | Atp5g1    | 0.735941 | 1 | 0.87832  | 76.1557  | 133.326 | No change |
| NM_144796    | Susd4     | 0.735968 | 1 | 0.93264  | 15.3427  | 27.905  | No change |
| NM_181348    | Prune2    | 0.736027 | 1 | 1.00504  | 1.29783  | 2.48445 | No change |
| NM_028133    | Egln3     | 0.736633 | 1 | 1.18511  | 2.03141  | 4.42657 | No change |
| NM_001190302 | Gm14326   | 0.736735 | 1 | 0.877304 | 13.2011  | 23.0947 | No change |
| NM_026672    | Gstm7     | 0.736872 | 1 | 0.793513 | 303.284  | 500.446 | No change |
| NM_198052    | Tbx3      | 0.737044 | 1 | 0.971041 | 4.32979  | 8.09114 | No change |
| NM_011276    | Rlim      | 0.737199 | 1 | 0.815537 | 27.6147  | 46.2707 | No change |
| NM_025337    | Akr7a5    | 0.737225 | 1 | 0.953968 | 15.4779  | 28.577  | No change |
| NM_030750    | Sgpp1     | 0.737593 | 1 | 0.8109   | 70.6574  | 118.01  | No change |
| NM_138956    | Rassf3    | 0.737991 | 1 | 0.954428 | 7.47001  | 13.7963 | No change |
| NM_145438    | Llg12     | 0.738175 | 1 | 1.04953  | 3.36462  | 6.64806 | No change |
| NM_194055    | Esrp1     | 0.738366 | 1 | 0.891144 | 13.5995  | 24.0232 | No change |
| NM_011141    | Pou3f1    | 0.738527 | 1 | 1.50617  | 0.532361 | 1.47826 | No change |
| NM_027011    | Krt5      | 0.738527 | 1 | 1.01549  | 6.96929  | 13.4403 | No change |
| NM_007838    | Ddost     | 0.73857  | 1 | 0.866383 | 36.1605  | 62.7785 | No change |
| NM_007591    | Calr      | 0.738756 | 1 | 0.770736 | 644.166  | 1046.23 | No change |
| NM_001110500 | Canx      | 0.739032 | 1 | 0.780357 | 175.65   | 287.198 | No change |
| NM_013767    | Csnk1e    | 0.739053 | 1 | 0.989288 | 6.84304  | 12.9536 | No change |
| NM_011404    | Slc7a5    | 0.739272 | 1 | 0.808989 | 73.9781  | 123.391 | No change |
| NR_028526    | Snord49b  | 0.739648 | 1 | 1.53707  | 23.231   | 66.0933 | No change |
| NM_020600    | Rps14     | 0.739729 | 1 | 0.863109 | 136.351  | 236.177 | No change |
| NM_146057    | Dap       | 0.739975 | 1 | 0.857765 | 60.4225  | 104.269 | No change |
| NM_009735    | B2m       | 0.740332 | 1 | 0.804116 | 362.517  | 602.609 | No change |
| NM_177186    | Slc35e2   | 0.740634 | 1 | 0.860299 | 13.768   | 23.801  | No change |
| NM_178606    | Reep3     | 0.741233 | 1 | 0.884721 | 10.913   | 19.1906 | No change |
| NM_012008    | Ddx3y     | 0.741402 | 1 | 0.868938 | 16.3869  | 28.4998 | No change |
| NM_001033293 | Uap1l1    | 0.741763 | 1 | 1.00423  | 10.1034  | 19.3283 | No change |
| NM_001110338 | Gprc5c    | 0.741781 | 1 | 0.964629 | 13.284   | 24.7104 | No change |
| NM_026667    | Fam114a1  | 0.742282 | 1 | 0.976121 | 7.37341  | 13.8275 | No change |
| NM_001111331 | Kcnip3    | 0.742898 | 1 | 1.01167  | 5.54592  | 10.6657 | No change |
| NM_146234    | Mmgt1     | 0.743273 | 1 | 0.954377 | 6.58704  | 12.1644 | No change |
| NM_001082485 | Zfp266    | 0.743302 | 1 | 0.863686 | 13.6081  | 23.58   | No change |
| NM_008929    | Dnajc3    | 0.744413 | 1 | 0.815773 | 47.3214  | 79.3021 | No change |
| NM_177290    | Itgb8     | 0.744364 | 1 | 1.12679  | 2.47617  | 5.17099 | No change |
| NM_012056    | Fkbp9     | 0.744619 | 1 | 0.880182 | 22.2666  | 39.0308 | No change |
| NM_007453    | Prdx6     | 0.745407 | 1 | 0.809976 | 129.831  | 216.696 | No change |
| NM_008706    | Nqo1      | 0.745733 | 1 | 1.00605  | 11.1814  | 21.417  | No change |
| NM_001110331 | Eci2      | 0.745756 | 1 | 0.944547 | 21.3575  | 39.1679 | No change |
| NM_025335    | Tmem167   | 0.74629  | 1 | 0.900001 | 4.79062  | 8.51476 | No change |
| NM_007833    | Dcn       | 0.746344 | 1 | 0.868697 | 46.0735  | 80.1146 | No change |
| NM_013721    | Rpl7a     | 0.746421 | 1 | 0.846909 | 142.935  | 244.787 | No change |
| NM_001037665 | Zfp1      | 0.74647  | 1 | 1.05496  | 6.48133  | 12.8541 | No change |
| NM_013677    | Surf1     | 0.747069 | 1 | 0.976573 | 19.1685  | 35.9564 | No change |

|                |               |          |   |          |          |         |           |
|----------------|---------------|----------|---|----------|----------|---------|-----------|
| NR_027961      | 9130230L23Rik | 0.748377 | 1 | 0.988768 | 14.092   | 26.6624 | No change |
| NM_010468      | Hoxd3         | 0.748631 | 1 | 1.01241  | 5.81175  | 11.1818 | No change |
| NM_080456      | Mrps6         | 0.749602 | 1 | 0.946348 | 39.8501  | 73.1716 | No change |
| NM_008705      | Nme2          | 0.74967  | 1 | 0.904741 | 66.9383  | 119.368 | No change |
| NM_178715      | Tmem30b       | 0.749854 | 1 | 0.933563 | 10.9147  | 19.8617 | No change |
| NM_001024672   | AB099516      | 0.749887 | 1 | 1.02826  | 10.389   | 20.2144 | No change |
| NM_030694      | Ifitm2        | 0.750316 | 1 | 0.934885 | 56.5769  | 103.049 | No change |
| NM_012005      | Med14         | 0.750553 | 1 | 0.889361 | 12.553   | 22.145  | No change |
| NM_008302      | Hsp90ab1      | 0.750917 | 1 | 0.790945 | 316.718  | 521.666 | No change |
| NM_031868      | Ppp1ca        | 0.752183 | 1 | 0.86213  | 75.3175  | 130.361 | No change |
| NR_030738      | 2410006H16Rik | 0.752186 | 1 | 1.29941  | 7.55889  | 17.9088 | No change |
| NM_023794      | Etv5          | 0.752318 | 1 | 0.853461 | 31.8377  | 54.773  | No change |
| NM_029802      | Arfp2         | 0.752429 | 1 | 0.931422 | 11.5269  | 20.9436 | No change |
| NM_181075      | 2610524H06Rik | 0.753025 | 1 | 1.00325  | 19.9123  | 38.0606 | No change |
| NM_013703      | Vldlr         | 0.753627 | 1 | 0.959871 | 3.38902  | 6.28214 | No change |
| NM_008253      | Hmgb3         | 0.753888 | 1 | 0.906157 | 31.8163  | 56.7912 | No change |
| NM_053196      | Sfxn2         | 0.753945 | 1 | 1.06641  | 3.66691  | 7.33108 | No change |
| NM_001163434   | Hspa5         | 0.754026 | 1 | 0.789612 | 396.705  | 652.805 | No change |
| NM_011176      | St14          | 0.754027 | 1 | 0.895126 | 15.337   | 27.1651 | No change |
| NM_008911      | Ppox          | 0.754483 | 1 | 1.06019  | 6.77411  | 13.483  | No change |
| NM_024173      | Atp6v1g1      | 0.754515 | 1 | 0.847869 | 130.969  | 224.437 | No change |
| NM_019427      | Epb4.1l4b     | 0.755001 | 1 | 0.961455 | 9.4694   | 17.5726 | No change |
| NM_008408      | Stt3a         | 0.755084 | 1 | 0.829598 | 83.8538  | 141.878 | No change |
| NM_010447      | Hnrnpa1       | 0.755322 | 1 | 0.886754 | 40.4924  | 71.3012 | No change |
| NM_134021      | Pnpo          | 0.755718 | 1 | 0.962649 | 13.7264  | 25.4936 | No change |
| NM_030143      | Ddit4l        | 0.755818 | 1 | 0.855113 | 46.3851  | 79.8909 | No change |
| NM_146026      | Prr15l        | 0.756185 | 1 | 1.04674  | 10.0804  | 19.8717 | No change |
| NM_001204979   | Sars          | 0.756486 | 1 | 0.874334 | 24.5038  | 42.7741 | No change |
| NM_172436      | Slc25a12      | 0.756961 | 1 | 1.04206  | 4.88613  | 9.59996 | No change |
| NM_001037999   | Dbi           | 0.757    | 1 | 0.888404 | 120.112  | 211.741 | No change |
| NM_025799      | Fuca2         | 0.757207 | 1 | 0.917568 | 11.968   | 21.5337 | No change |
| NM_031248      | Lamtor2       | 0.757532 | 1 | 0.993458 | 37.2265  | 70.6594 | No change |
| NM_145367      | Txndc5        | 0.757592 | 1 | 0.860777 | 44.58    | 77.0855 | No change |
| NM_145516      | Plekhh2       | 0.757623 | 1 | 0.893997 | 19.8973  | 35.2137 | No change |
| NM_001039056   | Kcnj15        | 0.757663 | 1 | 0.934493 | 7.81248  | 14.2248 | No change |
| NR_002883_2    | Gm5643        | 0.758067 | 1 | 0.889577 | 40.9958  | 72.3292 | No change |
| NM_001145959   | Ndrp2         | 0.758449 | 1 | 0.889702 | 33.7426  | 59.5373 | No change |
| NM_001145804   | Nucks1        | 0.758503 | 1 | 0.849878 | 24.5121  | 42.0636 | No change |
| NM_025698      | Tmed7         | 0.758645 | 1 | 0.844312 | 49.3221  | 84.3107 | No change |
| NM_001033123_2 | Gm14288       | 0.758828 | 1 | 0.919385 | 13.9468  | 25.1258 | No change |
| NM_001199308_2 | Gm14440       | 0.758828 | 1 | 0.919385 | 13.951   | 25.1332 | No change |
| NM_028060      | Slc35f2       | 0.759516 | 1 | 0.924753 | 17.3147  | 31.3107 | No change |
| NM_026662      | Prps2         | 0.759706 | 1 | 0.949158 | 9.21449  | 16.9512 | No change |
| NM_053119      | Echs1         | 0.759712 | 1 | 0.90605  | 38.282   | 68.3242 | No change |
| NM_001111060   | Cd59a         | 0.760448 | 1 | 1.04092  | 8.17196  | 16.0418 | No change |
| NM_133674      | Arhgef5       | 0.76072  | 1 | 0.922759 | 8.55856  | 15.4549 | No change |
| NM_009753      | Bicd1         | 0.760904 | 1 | 0.988324 | 4.33194  | 8.19228 | No change |
| NM_009154      | Sema5a        | 0.760997 | 1 | 0.911108 | 5.00984  | 8.97304 | No change |
| NM_001168571   | Ctps2         | 0.761072 | 1 | 1.09875  | 1.83301  | 3.74998 | No change |
| NM_001193619   | Cldn7         | 0.761228 | 1 | 0.997784 | 21.3518  | 40.6501 | No change |
| NM_015790      | Icosl         | 0.761278 | 1 | 1.02309  | 6.21353  | 12.0435 | No change |
| NM_144942      | Csad          | 0.761699 | 1 | 0.961852 | 13.2001  | 24.5008 | No change |
| NM_001163507   | Mmrn1         | 0.762465 | 1 | 1.21216  | 1.15829  | 2.57226 | No change |
| NM_001190436   | Fau           | 0.763325 | 1 | 0.854873 | 201.882  | 347.64  | No change |
| NM_025509      | Ostc          | 0.763338 | 1 | 0.924264 | 44.1651  | 79.8353 | No change |
| NM_010242      | Fut4          | 0.763655 | 1 | 0.952255 | 9.22518  | 17.0072 | No change |
| NM_001167588   | Pate-n        | 0.763926 | 1 | 1.11944  | 25.4151  | 52.7694 | No change |
| NM_023716      | Tubb2b        | 0.764293 | 1 | 0.969279 | 14.7943  | 27.6033 | No change |
| NM_146119      | Fam129b       | 0.764475 | 1 | 1.03585  | 4.28386  | 8.37853 | No change |
| NM_026198      | Tmem167b      | 0.76477  | 1 | 0.896165 | 24.8208  | 43.992  | No change |
| NM_176834      | Rnf208        | 0.765205 | 1 | 1.73053  | 0.731959 | 2.42355 | No change |
| NM_032394      | Myo7b         | 0.765323 | 1 | 1.07909  | 1.76585  | 3.56177 | No change |
| NM_009864      | Cdh1          | 0.765385 | 1 | 0.907213 | 13.7712  | 24.5973 | No change |
| NM_007921      | Elf3          | 0.765605 | 1 | 0.931982 | 22.5604  | 41.0023 | No change |
| NM_001039546   | Myo6          | 0.766538 | 1 | 0.8644   | 16.4755  | 28.5594 | No change |
| NM_011519      | Sdc1          | 0.76659  | 1 | 0.875106 | 34.3676  | 60.0216 | No change |
| NM_028123      | Slc37a3       | 0.766939 | 1 | 0.936459 | 10.3579  | 18.884  | No change |
| NM_001136061   | Ednrb         | 0.767251 | 1 | 1.27058  | 1.07828  | 2.49917 | No change |
| NM_175116      | Lpar6         | 0.767374 | 1 | 1.05276  | 5.76068  | 11.4028 | No change |
| NM_019657      | Hsd17b12      | 0.768694 | 1 | 0.933357 | 24.2921  | 44.1911 | No change |
| NM_145949      | Ido2          | 0.768786 | 1 | 1.171    | 2.26606  | 4.88293 | No change |
| NM_009551      | Zfand5        | 0.768855 | 1 | 0.904331 | 23.5343  | 41.9498 | No change |
| NM_007560      | Bmpr1b        | 0.769046 | 1 | 0.977632 | 5.13293  | 9.63312 | No change |
| NM_138310      | Apobr         | 0.769755 | 1 | 0.957274 | 9.48862  | 17.5538 | No change |
| NM_181274      | Zfp869        | 0.76976  | 1 | 0.947716 | 11.7192  | 21.5351 | No change |
| NM_013842      | Xbp1          | 0.769884 | 1 | 0.889609 | 47.7009  | 84.155  | No change |

|              |               |          |   |          |         |         |           |
|--------------|---------------|----------|---|----------|---------|---------|-----------|
| NM_026383    | Pnrc2         | 0.769925 | 1 | 0.898431 | 38.9579 | 69.1558 | No change |
| NM_013587    | Lrpap1        | 0.770581 | 1 | 0.862171 | 50.9691 | 88.2137 | No change |
| NM_001111063 | Comt          | 0.770856 | 1 | 0.905071 | 34.2839 | 61.1419 | No change |
| NM_001033242 | Cln5          | 0.770941 | 1 | 1.03243  | 6.97784 | 13.613  | No change |
| NM_001177568 | Gm14420       | 0.771206 | 1 | 0.930143 | 10.2955 | 18.6866 | No change |
| NM_025519    | Chmp4c        | 0.771315 | 1 | 1.20535  | 3.23157 | 7.13899 | No change |
| NM_008269    | Hoxb6         | 0.77187  | 1 | 0.950569 | 28.5203 | 52.5128 | No change |
| NR_024069    | 2010107H07Rik | 0.772095 | 1 | 1.34992  | 7.60915 | 18.7048 | No change |
| NM_012019    | Aifm1         | 0.772109 | 1 | 0.981904 | 12.8766 | 24.238  | No change |
| NM_011373    | St6galnac4    | 0.772369 | 1 | 1.0211   | 4.34782 | 8.41403 | No change |
| NR_033394    | Taz           | 0.773324 | 1 | 0.968207 | 17.491  | 32.6069 | No change |
| NM_011161    | Mapk11        | 0.773425 | 1 | 1.04115  | 6.64965 | 13.0529 | No change |
| NM_001040400 | Tet2          | 0.773855 | 1 | 0.918976 | 6.30053 | 11.3461 | No change |
| NM_025947    | Dynlrb1       | 0.774048 | 1 | 1.00911  | 31.0875 | 59.6514 | No change |
| NM_177236    | Atp2b3        | 0.774145 | 1 | 0.972865 | 6.74699 | 12.6191 | No change |
| NM_018860    | Rpl41         | 0.77427  | 1 | 0.818717 | 1423.19 | 2389.73 | No change |
| NM_021299    | Ak3           | 0.774487 | 1 | 0.883604 | 37.6712 | 66.1803 | No change |
| NM_027534    | Kdsr          | 0.774561 | 1 | 0.946702 | 7.29141 | 13.3885 | No change |
| NM_178892    | Tiparp        | 0.774581 | 1 | 0.896632 | 19.8476 | 35.1869 | No change |
| NM_008338    | Ifngr2        | 0.775071 | 1 | 0.927807 | 25.1501 | 45.5717 | No change |
| NM_025359    | Tspan13       | 0.775305 | 1 | 0.962503 | 17.7947 | 33.0395 | No change |
| NM_130861    | Slco1a5       | 0.775571 | 1 | 1.00256  | 9.03427 | 17.2547 | No change |
| NM_198937    | Hn1l          | 0.775577 | 1 | 0.939596 | 17.2494 | 31.5153 | No change |
| NM_016691    | Cicn5         | 0.775775 | 1 | 0.886082 | 29.9715 | 52.7444 | No change |
| NM_008503    | Rps2          | 0.776413 | 1 | 0.856621 | 193.871 | 334.234 | No change |
| NM_025865    | 2310030G06Rik | 0.776469 | 1 | 1.1      | 8.7537  | 17.9188 | No change |
| NM_172913    | Tox3          | 0.778131 | 1 | 0.986985 | 8.53427 | 16.1209 | No change |
| NM_026126    | Fundc2        | 0.778245 | 1 | 1.04915  | 4.85136 | 9.57653 | No change |
| NM_020564    | Sult5a1       | 0.778339 | 1 | 1.01781  | 17.6636 | 34.1007 | No change |
| NM_025628    | Cox6b1        | 0.779329 | 1 | 0.904724 | 154.291 | 275.08  | No change |
| NM_027855    | 0610007C21Rik | 0.779483 | 1 | 1.02415  | 20.3785 | 39.5187 | No change |
| NM_170758    | Cd300a        | 0.779509 | 1 | 1.19943  | 1.33621 | 2.93845 | No change |
| NM_008900    | Pou3f3        | 0.780513 | 1 | 0.977328 | 10.0536 | 18.8615 | No change |
| NM_025823    | Pcyox1        | 0.780937 | 1 | 0.883956 | 27.1073 | 47.632  | No change |
| NM_026468    | Atp5g2        | 0.781102 | 1 | 0.952812 | 63.1222 | 116.397 | No change |
| NM_001177543 | 0610010B08Rik | 0.781273 | 1 | 0.905128 | 17.596  | 31.3799 | No change |
| NM_173742    | Rnasek        | 0.781791 | 1 | 0.97667  | 50.533  | 94.7595 | No change |
| NM_001171034 | Tmbim6        | 0.782361 | 1 | 0.851279 | 101.057 | 173.573 | No change |
| NR_029464    | 5033406O09Rik | 0.783028 | 1 | 1.30978  | 2.17664 | 5.19021 | No change |
| NM_001141930 | Ctnnbip1      | 0.783271 | 1 | 0.988973 | 10.9584 | 20.7278 | No change |
| NM_015764    | Greb1         | 0.784145 | 1 | 0.927238 | 7.34972 | 13.3114 | No change |
| NM_133764    | Atp6v0e2      | 0.784145 | 1 | 0.984625 | 16.1502 | 30.4544 | No change |
| NM_001205054 | Aga           | 0.78428  | 1 | 1.11879  | 8.02022 | 16.6373 | No change |
| NM_026938    | Tmem160       | 0.78472  | 1 | 1.26913  | 5.55833 | 12.8607 | No change |
| NM_178939    | Pdrg1         | 0.784988 | 1 | 0.918887 | 55.3461 | 99.6545 | No change |
| NM_001100415 | Gm14430       | 0.785201 | 1 | 0.909099 | 17.5691 | 31.4184 | No change |
| NM_001101804 | Gm14434       | 0.785201 | 1 | 0.909099 | 17.5691 | 31.4184 | No change |
| NM_001109757 | Atp7a         | 0.785532 | 1 | 0.914546 | 9.00892 | 16.1719 | No change |
| NM_172086    | Rpl32         | 0.78599  | 1 | 0.872488 | 328.829 | 573.188 | No change |
| NR_037964    | 2610507I01Rik | 0.78625  | 1 | 1.04375  | 6.04565 | 11.8869 | No change |
| NM_001083110 | Pja1          | 0.786375 | 1 | 0.853503 | 102.603 | 176.499 | No change |
| NM_172458    | Zfp871        | 0.786614 | 1 | 0.907038 | 7.78505 | 13.9016 | No change |
| NM_011783    | Agr2          | 0.786691 | 1 | 0.992549 | 36.8639 | 69.9017 | No change |
| NM_024459    | Ppp3r1        | 0.786752 | 1 | 0.92625  | 22.0978 | 39.9938 | No change |
| NM_025786    | Rnf186        | 0.786758 | 1 | 1.01891  | 17.3816 | 33.5787 | No change |
| NM_139144    | Ogt           | 0.786997 | 1 | 0.883434 | 24.6721 | 43.3359 | No change |
| NM_028757    | Nebi          | 0.78739  | 1 | 1.0863   | 4.30319 | 8.72092 | No change |
| NM_018771    | Gipc1         | 0.787698 | 1 | 0.987406 | 18.4583 | 34.8737 | No change |
| NM_025975    | Dynlt3        | 0.787904 | 1 | 0.915816 | 34.6684 | 62.2878 | No change |
| NM_019770    | Tmed2         | 0.789215 | 1 | 0.870881 | 94.2178 | 164.047 | No change |
| NM_001099634 | Myof          | 0.789435 | 1 | 0.894461 | 15.7286 | 27.84   | No change |
| NM_009441    | Ttc3          | 0.789533 | 1 | 0.893983 | 15.4672 | 27.3682 | No change |
| NM_028132    | Pgm2          | 0.789824 | 1 | 0.995109 | 12.0634 | 22.9153 | No change |
| NM_009091    | Rps15         | 0.78991  | 1 | 0.876222 | 318.558 | 556.724 | No change |
| NM_010749    | M6pr          | 0.789919 | 1 | 0.907931 | 39.5826 | 70.7248 | No change |
| NM_016794    | Vamp8         | 0.790377 | 1 | 0.958443 | 54.1761 | 100.288 | No change |
| NM_001166064 | Syde2         | 0.790397 | 1 | 1.14092  | 1.66147 | 3.50136 | No change |
| NM_001161817 | Myo1b         | 0.790418 | 1 | 0.916183 | 15.3183 | 27.5287 | No change |
| NM_019563    | Cited4        | 0.790594 | 1 | 1.14754  | 6.98037 | 14.7805 | No change |
| NM_009673    | Anxa5         | 0.79103  | 1 | 0.898987 | 61.1987 | 108.666 | No change |
| NM_026416    | S100a16       | 0.791194 | 1 | 1.0184   | 21.4794 | 41.4777 | No change |
| NM_001164689 | Gm6710        | 0.791201 | 1 | 0.944417 | 13.5964 | 24.9222 | No change |
| NM_025586    | Rpl15         | 0.791331 | 1 | 0.86551  | 122.767 | 212.955 | No change |
| NM_175016    | Alkbh2        | 0.791606 | 1 | 1.33625  | 3.27197 | 7.9543  | No change |
| NM_029770    | Unc5b         | 0.791722 | 1 | 1.0838   | 2.29261 | 4.6376  | No change |
| NM_001044700 | Zfp2          | 0.792117 | 1 | 1.17069  | 2.54471 | 5.47878 | No change |



|              |                    |          |   |          |          |         |           |
|--------------|--------------------|----------|---|----------|----------|---------|-----------|
| NM_016903    | Esd                | 0.792924 | 1 | 1.07805  | 8.74392  | 17.615  | No change |
| NM_175380    | Gpd1l              | 0.793136 | 1 | 0.978812 | 7.88468  | 14.806  | No change |
| NM_001033330 | Frmpd4             | 0.79345  | 1 | 1.02193  | 2.6148   | 5.06181 | No change |
| NM_029478    | Vmp1               | 0.793543 | 1 | 0.91328  | 30.7624  | 55.1701 | No change |
| NM_053108    | Glrx               | 0.793956 | 1 | 1.05024  | 13.3399  | 26.3468 | No change |
| NM_016695    | Mpp2               | 0.79438  | 1 | 0.955358 | 11.3739  | 21.0086 | No change |
| NM_001163513 | Dlg5               | 0.794892 | 1 | 0.919922 | 9.93965  | 17.9089 | No change |
| NM_015818    | Hs6st1             | 0.794997 | 1 | 1.00138  | 7.47714  | 14.2655 | No change |
| NM_008687    | Nfib               | 0.795203 | 1 | 0.896635 | 14.1832  | 25.1422 | No change |
| NM_177388    | Slc41a2            | 0.795215 | 1 | 0.898407 | 26.3295  | 46.7312 | No change |
| NM_010547    | Ikbkg              | 0.79562  | 1 | 0.953943 | 7.05725  | 13.0223 | No change |
| NM_001190400 | Bend7              | 0.796382 | 1 | 1.24963  | 1.36332  | 3.10832 | No change |
| NM_011193    | Pstpip1            | 0.796936 | 1 | 1.1604   | 4.55583  | 9.73503 | No change |
| NM_030685    | Serp1              | 0.797755 | 1 | 0.866868 | 106.318  | 184.593 | No change |
| NM_001199271 | Slc19a1            | 0.797964 | 1 | 1.31116  | 1.76242  | 4.20426 | No change |
| NM_207625    | Acs14              | 0.79831  | 1 | 0.88688  | 29.8175  | 52.4971 | No change |
| NM_029751    | Rpl18a             | 0.798345 | 1 | 0.886078 | 124.324  | 218.765 | No change |
| NM_175414    | Tspan9             | 0.799201 | 1 | 0.95287  | 12.9987  | 23.9669 | No change |
| NM_145512    | Sft2d2             | 0.799766 | 1 | 0.897127 | 23.4958  | 41.6637 | No change |
| NM_181315    | Car5b              | 0.799898 | 1 | 0.970491 | 11.9422  | 22.2929 | No change |
| NM_026611    | Rnaset2b           | 0.800762 | 1 | 0.973473 | 39.628   | 74.1297 | No change |
| NM_175314    | Adamts9            | 0.801334 | 1 | 1.00047  | 4.95333  | 9.44368 | No change |
| NM_008287    | Hrsp12             | 0.801521 | 1 | 1.07451  | 15.5652  | 31.2731 | No change |
| NM_001111116 | Gm15427            | 0.801567 | 1 | 0.890235 | 260.279  | 459.319 | No change |
| NM_025283    | Mobk13             | 0.801788 | 1 | 1.04577  | 6.92984  | 13.6418 | No change |
| NM_008197    | H1f0               | 0.802113 | 1 | 0.957592 | 21.7695  | 40.2707 | No change |
| NM_175408    | Tmem139            | 0.802325 | 1 | 1.19554  | 6.19763  | 13.5821 | No change |
| NM_013755    | Gyg                | 0.802982 | 1 | 1.09183  | 8.01022  | 16.2933 | No change |
| NM_009076    | Rpl12              | 0.803105 | 1 | 1.14466  | 15.0746  | 31.8446 | No change |
| NM_009112    | S100a10            | 0.803265 | 1 | 1.01514  | 40.4219  | 77.8656 | No change |
| NM_028013    | Endod1             | 0.803352 | 1 | 0.936404 | 15.3418  | 27.9615 | No change |
| NM_001081667 | Klh134             | 0.803424 | 1 | 1.06333  | 8.86019  | 17.6602 | No change |
| NM_030069    | Fam55b             | 0.803562 | 1 | 0.977237 | 11.7741  | 22.083  | No change |
| NM_177376    | Myo3b              | 0.803708 | 1 | 0.941852 | 10.1487  | 18.5674 | No change |
| NR_038007    | 9330162B11Rik      | 0.804012 | 1 | 2.28378  | 0.220547 | 1.13593 | No change |
| NM_144861    | Rprd1a             | 0.804057 | 1 | 0.902434 | 29.551   | 52.5944 | No change |
| NM_133862    | Fgg                | 0.805074 | 1 | 1.67185  | 0.777925 | 2.45117 | No change |
| NM_011896    | Spry1              | 0.805084 | 1 | 1.05771  | 7.30516  | 14.5024 | No change |
| NM_022723    | Scube1             | 0.805323 | 1 | 0.984868 | 4.72993  | 8.91882 | No change |
| NM_173011    | Idh2               | 0.805784 | 1 | 0.978094 | 23.6817  | 44.442  | No change |
| NM_001109761 | Capn3              | 0.806558 | 1 | 1.33625  | 1.40821  | 3.42122 | No change |
| NM_009510    | Ezr                | 0.806693 | 1 | 0.87503  | 87.1729  | 152.211 | No change |
| NM_021882    | Pmel               | 0.807017 | 1 | 1.05641  | 8.76888  | 17.3916 | No change |
| NM_001163314 | Pgap1              | 0.807288 | 1 | 0.961411 | 17.6478  | 32.7323 | No change |
| NM_018805    | Hs3st3b1           | 0.80817  | 1 | 0.950088 | 9.99427  | 18.3902 | No change |
| NM_009767    | Chic1              | 0.80839  | 1 | 1.08114  | 2.09051  | 4.21957 | No change |
| NM_010578    | Itgb1              | 0.808402 | 1 | 0.901677 | 33.6999  | 59.9456 | No change |
| NM_026211    | Tmed9              | 0.809207 | 1 | 0.941307 | 47.8869  | 87.5741 | No change |
| NM_183284    | Spink2             | 0.809396 | 1 | 0.86335  | 699.662  | 1211.77 | No change |
| NM_025589    | Rpl36al            | 0.809555 | 1 | 0.909381 | 238.061  | 425.747 | No change |
| NM_007379    | Abca2              | 0.809776 | 1 | 0.889521 | 24.0955  | 42.4993 | No change |
| NM_172575    | Zfp277             | 0.810014 | 1 | 1.08689  | 6.10594  | 12.3747 | No change |
| NM_001206367 | Gsn                | 0.810049 | 1 | 0.906295 | 50.2106  | 89.6027 | No change |
| NM_025592    | Rpl35              | 0.811538 | 1 | 0.925647 | 207.229  | 374.838 | No change |
| NM_001013387 | Zfp182             | 0.811907 | 1 | 1.06571  | 3.03729  | 6.06343 | No change |
| NM_134109    | Ildr1              | 0.812099 | 1 | 1.04788  | 7.28894  | 14.3682 | No change |
| NM_001161844 | Cblc               | 0.812531 | 1 | 1.30941  | 2.77861  | 6.61603 | No change |
| NM_025919    | Rpl11              | 0.812613 | 1 | 0.985356 | 67.3464  | 127.024 | No change |
| NM_176830    | Leprel4            | 0.813465 | 1 | 1.07255  | 9.22022  | 18.4957 | No change |
| NM_019760    | Serinc1            | 0.813599 | 1 | 0.902795 | 53.7292  | 95.6464 | No change |
| NM_011292    | Rpl9               | 0.813747 | 1 | 1.02427  | 36.6248  | 70.9988 | No change |
| NM_025387    | Tmem14c            | 0.813764 | 1 | 1.0875   | 16.1055  | 32.6528 | No change |
| NM_011327    | Scp2               | 0.814228 | 1 | 0.910003 | 51.3006  | 91.7834 | No change |
| NM_010255    | Gamt               | 0.814443 | 1 | 0.947701 | 72.2031  | 132.631 | No change |
| NR_027981    | 1810064F22Rik      | 0.814577 | 1 | 1.1545   | 4.20822  | 8.95048 | No change |
| NM_008972    | Ptma               | 0.815014 | 1 | 0.890197 | 183.353  | 323.541 | No change |
| NM_009696    | Apoe               | 0.815082 | 1 | 0.869818 | 331.975  | 577.541 | No change |
| NM_019738    | Nupr1              | 0.815396 | 1 | 1.16116  | 14.9183  | 31.8816 | No change |
| NM_009096    | Rps6               | 0.815885 | 1 | 0.87916  | 222.227  | 389.134 | No change |
| NM_026062    | Fam69a             | 0.815938 | 1 | 0.963879 | 20.1864  | 37.5031 | No change |
| NM_181820    | Tmc4               | 0.815979 | 1 | 0.975816 | 19.9929  | 37.4562 | No change |
| NM_009331    | Tcf7               | 0.816136 | 1 | 0.994141 | 16.8905  | 32.0542 | No change |
| NM_001100416 | OTTMUSG00000016609 | 0.816644 | 1 | 0.982831 | 16.7945  | 31.6192 | No change |
| NM_001024849 | Gm14325            | 0.816756 | 1 | 0.953072 | 14.8591  | 27.3974 | No change |
| NM_028801    | Muc5b              | 0.816911 | 1 | 0.864387 | 36.968   | 64.0712 | No change |
| NM_016899    | Rab25              | 0.817184 | 1 | 1.07129  | 16.8973  | 33.8637 | No change |

|              |               |          |   |          |          |         |           |
|--------------|---------------|----------|---|----------|----------|---------|-----------|
| NM_007724    | Cnga2         | 0.817276 | 1 | 1.16789  | 2.98225  | 6.404   | No change |
| NM_022417    | Iitm2c        | 0.818192 | 1 | 0.905532 | 79.6097  | 141.986 | No change |
| NM_175406    | Atp6v0d2      | 0.818366 | 1 | 0.969465 | 21.022   | 39.2083 | No change |
| NM_001008702 | Dab2          | 0.818384 | 1 | 0.934927 | 23.6356  | 43.0291 | No change |
| NM_023133    | Rps19         | 0.818794 | 1 | 1.00192  | 56.2862  | 107.401 | No change |
| NM_025559    | 1810046J19Rik | 0.819294 | 1 | 0.96223  | 79.2476  | 147.056 | No change |
| NM_175400    | Sephs1        | 0.819298 | 1 | 1.03813  | 4.59989  | 9.00425 | No change |
| NM_027468    | Cpm           | 0.819795 | 1 | 1.1595   | 1.86474  | 3.97994 | No change |
| NM_008622    | Mpv17         | 0.819888 | 1 | 1.06046  | 11.7515  | 23.3699 | No change |
| NM_008597    | Mgp           | 0.820394 | 1 | 0.962981 | 98.8965  | 183.612 | No change |
| NM_001159645 | Araf          | 0.820451 | 1 | 1.00694  | 21.6931  | 41.5391 | No change |
| NM_145602    | Ndrq4         | 0.820665 | 1 | 1.04252  | 8.11933  | 15.9426 | No change |
| NM_025273    | Pcbd1         | 0.820823 | 1 | 1.11773  | 15.9175  | 32.9707 | No change |
| NM_009334    | Tcfap2b       | 0.820837 | 1 | 1.01558  | 5.17401  | 9.96799 | No change |
| NM_013930    | Aass          | 0.821264 | 1 | 1.01663  | 8.36089  | 16.1195 | No change |
| NM_027925    | Trnau1ap      | 0.821355 | 1 | 1.06269  | 17.6391  | 35.1331 | No change |
| NM_145463    | Shisa2        | 0.821927 | 1 | 1.04993  | 7.13323  | 14.0798 | No change |
| NM_027935    | Tmem50a       | 0.822019 | 1 | 0.992549 | 37.39    | 70.8739 | No change |
| NM_013632    | Pnp           | 0.822035 | 1 | 0.990494 | 14.2893  | 27.0467 | No change |
| NM_007451    | Slc25a5       | 0.822509 | 1 | 0.943854 | 66.5404  | 121.894 | No change |
| NM_021605    | Nek7          | 0.82283  | 1 | 0.992506 | 12.2988  | 23.3118 | No change |
| NM_001166464 | Spock1        | 0.82287  | 1 | 1.12596  | 3.92855  | 8.18509 | No change |
| NM_011660    | Txn1          | 0.823511 | 1 | 0.947596 | 74.8652  | 137.503 | No change |
| NM_027934    | Rnf180        | 0.824133 | 1 | 0.958508 | 17.658   | 32.6805 | No change |
| NM_011464    | Spint2        | 0.824143 | 1 | 0.909561 | 115.28   | 206.178 | No change |
| NM_001081979 | Mecp2         | 0.824145 | 1 | 0.934694 | 9.81098  | 17.8576 | No change |
| NM_007376    | Pzp           | 0.824169 | 1 | 1.16484  | 2.05461  | 4.40163 | No change |
| NM_013541    | Gstp1         | 0.824293 | 1 | 0.961852 | 85.6174  | 158.828 | No change |
| NM_007602    | Capn5         | 0.82446  | 1 | 0.940252 | 20.5397  | 37.5312 | No change |
| NM_013556    | Hprt          | 0.825015 | 1 | 1.0347   | 19.7868  | 38.6362 | No change |
| NM_029364    | Gns           | 0.825486 | 1 | 0.930378 | 28.7449  | 52.1625 | No change |
| NM_177397    | Atp6v1g3      | 0.825621 | 1 | 1.14527  | 5.83544  | 12.3266 | No change |
| NM_008150    | Gpc4          | 0.825711 | 1 | 0.983205 | 20.743   | 39.0605 | No change |
| NM_181074    | Lingo1        | 0.826258 | 1 | 0.988727 | 13.7271  | 25.9493 | No change |
| NM_183027    | Ap1s3         | 0.826779 | 1 | 1.1991   | 2.76252  | 6.06579 | No change |
| NM_178243    | 5830403L16Rik | 0.827078 | 1 | 0.861255 | 646.619  | 1118.23 | No change |
| NM_153143    | Kctd11        | 0.82743  | 1 | 1.26586  | 2.04829  | 4.72101 | No change |
| NM_025790    | Acot13        | 0.827434 | 1 | 1.095    | 23.3664  | 47.6165 | No change |
| NM_001164200 | Prkacb        | 0.827718 | 1 | 0.927926 | 28.3387  | 51.3367 | No change |
| NM_007410    | Adh5          | 0.828702 | 1 | 0.980092 | 34.0963  | 64.064  | No change |
| NM_025478    | Isoc1         | 0.828872 | 1 | 1.00318  | 15.2547  | 29.1309 | No change |
| NM_001160379 | Fam46a        | 0.829437 | 1 | 1.03771  | 4.96163  | 9.70825 | No change |
| NM_029796    | Lrg1          | 0.829798 | 1 | 1.29266  | 3.65721  | 8.59581 | No change |
| NM_134042    | Aldh6a1       | 0.829991 | 1 | 0.894633 | 88.3611  | 156.395 | No change |
| NM_011172    | Prodh         | 0.830169 | 1 | 1.04025  | 11.6308  | 22.7983 | No change |
| NM_001024728 | C330021F23Rik | 0.830481 | 1 | 0.913798 | 109.032  | 195.576 | No change |
| NR_038073    | Shhg4         | 0.830482 | 1 | 1.25905  | 5.08619  | 11.6637 | No change |
| NM_008784    | Igbbp1        | 0.830918 | 1 | 1.06727  | 13.6815  | 27.3354 | No change |
| NM_001100608 | Gm15450       | 0.831263 | 1 | 0.911112 | 389.154  | 696.735 | No change |
| NM_001178039 | Gm10136       | 0.831767 | 1 | 0.91063  | 385.009  | 689.081 | No change |
| NM_024175    | Rps23         | 0.831869 | 1 | 0.911712 | 347.083  | 621.671 | No change |
| NM_172700    | Zmpste24      | 0.832397 | 1 | 0.978679 | 16.3362  | 30.6629 | No change |
| NR_030696    | 9930014A18Rik | 0.832522 | 1 | 1.09049  | 3.36917  | 6.84323 | No change |
| NM_153179    | Pkhd1         | 0.832765 | 1 | 0.95507  | 6.25339  | 11.545  | No change |
| NM_001168600 | Gnl3l         | 0.833138 | 1 | 0.975087 | 12.3013  | 23.0312 | No change |
| NM_011051    | Pdcd6         | 0.833158 | 1 | 1.01373  | 23.8255  | 45.835  | No change |
| NM_019989    | Sh3bgrl       | 0.833459 | 1 | 0.982081 | 19.1189  | 35.9714 | No change |
| NM_133198    | Pygl          | 0.83415  | 1 | 0.972055 | 22.4075  | 41.8632 | No change |
| NM_172393    | Aim1          | 0.834776 | 1 | 0.963697 | 9.78295  | 18.1704 | No change |
| NM_008075    | Gabbr1        | 0.834945 | 1 | 1.69882  | 0.526335 | 1.69032 | No change |
| NM_016674    | Cldn1         | 0.835186 | 1 | 1.01828  | 10.8808  | 20.999  | No change |
| NM_001033359 | Cntn5         | 0.835556 | 1 | 1.15387  | 3.07298  | 6.53007 | No change |
| NR_002218    | Tpt1p         | 0.835563 | 1 | 0.896825 | 404.202  | 716.499 | No change |
| NM_007657    | Cd9           | 0.835769 | 1 | 0.951876 | 75.3643  | 138.824 | No change |
| NM_009093    | Rps29         | 0.835818 | 1 | 1.59498  | 4.1101   | 12.1492 | No change |
| NM_181401    | Tmem64        | 0.835988 | 1 | 0.898917 | 66.5664  | 118.169 | No change |
| NM_015729    | Acox1         | 0.835989 | 1 | 0.921381 | 42.1094  | 75.9324 | No change |
| NM_013643    | Ptpn5         | 0.836111 | 1 | 0.998378 | 14.4415  | 27.4832 | No change |
| NM_172658    | Slco4c1       | 0.83661  | 1 | 1.00264  | 18.02    | 34.3961 | No change |
| NM_011386    | Skil          | 0.836986 | 1 | 0.929671 | 21.1559  | 38.3697 | No change |
| NM_172928    | Dclk3         | 0.836995 | 1 | 1.15338  | 3.20771  | 6.81378 | No change |
| NM_008356    | Il13ra2       | 0.837503 | 1 | 1.30911  | 3.08536  | 7.33801 | No change |
| NM_018818    | Chm           | 0.837704 | 1 | 1.03912  | 5.94259  | 11.6382 | No change |
| NM_023065    | Ifi30         | 0.838076 | 1 | 1.04929  | 26.6849  | 52.637  | No change |
| NM_009429    | Tpt1          | 0.838102 | 1 | 0.899195 | 369.825  | 656.638 | No change |
| NM_008520    | Ltbp3         | 0.838103 | 1 | 1.03632  | 5.76075  | 11.2597 | No change |

|              |               |          |   |          |          |                   |
|--------------|---------------|----------|---|----------|----------|-------------------|
| NM_009057    | Slc50a1       | 0.840154 | 1 | 1.00676  | 41.8703  | 80.1502 No change |
| NM_172300    | Ube2z         | 0.840391 | 1 | 0.944889 | 28.0247  | 51.3697 No change |
| NM_001099674 | 1810022K09Rik | 0.840569 | 1 | 1.20927  | 20.1606  | 44.5784 No change |
| NM_027335    | 2210016F16Rik | 0.840581 | 1 | 1.05146  | 9.3105   | 18.3929 No change |
| NM_001083938 | Rnaset2a      | 0.840767 | 1 | 0.931671 | 153.513  | 278.806 No change |
| NM_023402    | Myl12b        | 0.841288 | 1 | 0.948897 | 111.553  | 205.052 No change |
| NM_030004    | Cryl1         | 0.841795 | 1 | 1.12068  | 10.3798  | 21.5373 No change |
| NM_001081062 | Ccno          | 0.842319 | 1 | 1.0411   | 15.8258  | 31.0354 No change |
| NM_020267    | Trim44        | 0.842466 | 1 | 0.933035 | 26.5012  | 48.1762 No change |
| NM_133942    | Plekha1       | 0.842564 | 1 | 0.973212 | 21.2164  | 39.6677 No change |
| NM_011058    | Pdgfra        | 0.843108 | 1 | 0.938478 | 20.4304  | 37.2813 No change |
| NM_080285    | Cttnbp2       | 0.843111 | 1 | 1.04347  | 4.92351  | 9.67139 No change |
| NM_008812    | Padi2         | 0.843992 | 1 | 1.03104  | 7.07476  | 13.7758 No change |
| NM_009785    | Cacna2d3      | 0.844115 | 1 | 1.0946   | 4.96055  | 10.1032 No change |
| NM_145441    | Ubxn2a        | 0.844407 | 1 | 1.00711  | 17.8743  | 34.2229 No change |
| NM_010460    | Hoxb7         | 0.845748 | 1 | 1.00992  | 34.7092  | 66.5863 No change |
| NM_018811    | Abhd2         | 0.846614 | 1 | 0.891035 | 216.209  | 381.706 No change |
| NM_011421    | Smpd1         | 0.847131 | 1 | 1.05045  | 11.7311  | 23.1565 No change |
| NM_011170    | Prnp          | 0.847878 | 1 | 0.949001 | 54.2942  | 99.8046 No change |
| NR_028541    | Snord65       | 0.848284 | 1 | 1.65227  | 24.4537  | 75.5694 No change |
| NM_144904    | Rod1          | 0.848699 | 1 | 0.919506 | 35.5556  | 64.0275 No change |
| NM_001177732 | Plch1         | 0.849531 | 1 | 1.07574  | 3.60902  | 7.25231 No change |
| NM_008116    | Ggt1          | 0.849908 | 1 | 0.998223 | 26.8156  | 51.0206 No change |
| NM_010298    | Glrb          | 0.849918 | 1 | 1.11087  | 5.62115  | 11.5807 No change |
| NR_027059    | 2810008D09Rik | 0.850194 | 1 | 1.24114  | 11.8478  | 26.802 No change  |
| NM_080595    | Emid1         | 0.850506 | 1 | 1.00051  | 27.7167  | 52.8195 No change |
| NM_175097    | Prickle3      | 0.85059  | 1 | 1.06536  | 10.6182  | 21.1808 No change |
| NM_024171    | Sec61b        | 0.850645 | 1 | 1.08308  | 38.7604  | 78.2938 No change |
| NM_025402    | 1110031I02Rik | 0.850719 | 1 | 1.18914  | 7.7935   | 16.9803 No change |
| NM_178727    | D630039A03Rik | 0.851343 | 1 | 1.22256  | 2.74344  | 6.12306 No change |
| NM_028176    | Cda           | 0.851757 | 1 | 1.58334  | 2.15368  | 6.30057 No change |
| NR_003363    | Gm6548        | 0.851802 | 1 | 0.914041 | 155.545  | 279.035 No change |
| NM_011290    | Rpl6          | 0.853449 | 1 | 0.938914 | 133.476  | 243.63 No change  |
| NR_002173    | Snord15b      | 0.853743 | 1 | 1.01339  | 321.068  | 617.402 No change |
| NM_145962    | Pank3         | 0.85385  | 1 | 0.94509  | 19.8339  | 36.3585 No change |
| NM_144558    | Bivm          | 0.854584 | 1 | 1.19515  | 2.67374  | 5.85023 No change |
| NM_010028    | Ddx3x         | 0.85471  | 1 | 0.943971 | 33.4057  | 61.1896 No change |
| NM_009976    | Cst3          | 0.854712 | 1 | 0.934577 | 257.92   | 469.35 No change  |
| NM_145381    | Lactb2        | 0.854962 | 1 | 1.09175  | 10.8895  | 22.1305 No change |
| NR_028575    | Snord123      | 0.855218 | 1 | 1.00739  | 8.33691  | 15.9639 No change |
| NM_025703    | Tceal8        | 0.855346 | 1 | 1.00192  | 24.5902  | 46.906 No change  |
| NM_029767    | Rps9          | 0.855638 | 1 | 0.936906 | 262.712  | 478.845 No change |
| NM_030711    | Erap1         | 0.856472 | 1 | 1.06995  | 6.35466  | 12.7163 No change |
| NM_130864    | Acaa1a        | 0.856592 | 1 | 1.12319  | 9.11796  | 18.9482 No change |
| NR_033595    | Gm13498       | 0.856736 | 1 | 1.42318  | 1.44992  | 3.75052 No change |
| NM_001161806 | Wfdc11        | 0.857048 | 1 | 1.15728  | 20.2189  | 43.0513 No change |
| NM_001080384 | Clta          | 0.857133 | 1 | 1.02044  | 41.1059  | 79.4354 No change |
| NM_153546    | Mboat1        | 0.857676 | 1 | 1.06369  | 9.53107  | 18.9881 No change |
| NM_008062    | G6pdx         | 0.85786  | 1 | 0.96068  | 43.7446  | 81.0667 No change |
| NM_027207    | 1600002K03Rik | 0.858457 | 1 | 1.5347   | 3.21166  | 9.0428 No change  |
| NM_145928    | Tspan14       | 0.858697 | 1 | 1.02075  | 18.2114  | 35.1996 No change |
| NM_001204908 | Zfp648        | 0.858839 | 1 | 1.00367  | 30.2609  | 57.7923 No change |
| NM_008862    | Pkia          | 0.859174 | 1 | 1.08852  | 5.96232  | 12.0886 No change |
| NM_001166635 | Mid1ip1       | 0.859278 | 1 | 0.952605 | 67.6621  | 124.684 No change |
| NM_023557    | Slc44a4       | 0.859321 | 1 | 1.15635  | 5.43872  | 11.5723 No change |
| NM_010118    | Egr2          | 0.859344 | 1 | 0.965604 | 36.0805  | 67.0937 No change |
| NM_009592    | Abcb7         | 0.8599   | 1 | 1.01403  | 8.67683  | 16.6918 No change |
| NM_134020    | Tmed4         | 0.860955 | 1 | 0.947067 | 100.915  | 185.243 No change |
| NR_030485    | Mir704        | 0.861264 | 1 | 1.46435  | 35.299   | 94.1674 No change |
| NM_001111313 | Gm9104        | 0.86163  | 1 | 0.948968 | 308.756  | 567.51 No change  |
| NM_018755    | Pgcp          | 0.861834 | 1 | 1.01839  | 24.0273  | 46.3628 No change |
| NM_001114663 | Plcl1         | 0.861862 | 1 | 1.06038  | 4.51861  | 8.98072 No change |
| NM_146115    | A830007P12Rik | 0.862399 | 1 | 1.05327  | 9.37236  | 18.5341 No change |
| NM_019647    | Rpl21         | 0.86243  | 1 | 0.950026 | 85.3138  | 156.927 No change |
| NM_026281    | Tm7sf3        | 0.862544 | 1 | 0.990058 | 22.242   | 42.0732 No change |
| NM_019734    | Asah1         | 0.863422 | 1 | 0.97376  | 43.9644  | 82.22 No change   |
| NM_020561    | Smpdl3a       | 0.863675 | 1 | 1.06329  | 16.3434  | 32.5484 No change |
| NM_021473    | Akr1a4        | 0.863886 | 1 | 0.919171 | 288.893  | 520.085 No change |
| NM_010008    | Cyp2j6        | 0.864924 | 1 | 1.10866  | 5.36994  | 11.0432 No change |
| NM_010401    | Hal           | 0.865012 | 1 | 1.48936  | 0.909698 | 2.47286 No change |
| NM_025828    | Lman2         | 0.865404 | 1 | 0.920957 | 92.1917  | 166.176 No change |
| NM_016797    | Stx7          | 0.86589  | 1 | 1.03437  | 16.6148  | 32.4208 No change |
| NM_133655    | Cd81          | 0.866266 | 1 | 0.960302 | 90.2152  | 167.134 No change |
| NR_002840    | Gas5          | 0.866288 | 1 | 0.9852   | 33.2365  | 62.6555 No change |
| NM_009324    | Tbx2          | 0.866328 | 1 | 1.09548  | 6.16319  | 12.5564 No change |
| NM_010305    | Gnai1         | 0.866382 | 1 | 1.03153  | 13.5544  | 26.3961 No change |

|              |               |          |   |          |           |         |           |
|--------------|---------------|----------|---|----------|-----------|---------|-----------|
| NM_001082483 | Efr3b         | 0.866742 | 1 | 1.11385  | 2.86351   | 5.91039 | No change |
| NM_026268    | Dusp6         | 0.866838 | 1 | 1.02021  | 18.015    | 34.8046 | No change |
| NM_028443    | Fam101a       | 0.867009 | 1 | 1.4021   | 2.15415   | 5.48222 | No change |
| NM_011296    | Rps18         | 0.86937  | 1 | 0.965611 | 249.112   | 463.216 | No change |
| NM_010266    | Gda           | 0.869985 | 1 | 1.13185  | 3.06201   | 6.40115 | No change |
| NM_025272    | Atp6v0e       | 0.870164 | 1 | 1.02949  | 58.486    | 113.729 | No change |
| NM_025963    | Rps10         | 0.87127  | 1 | 1.0098   | 108.249   | 207.605 | No change |
| NM_175358    | Zdhhc15       | 0.871446 | 1 | 1.1565   | 2.51795   | 5.35695 | No change |
| NM_008594    | Mfge8         | 0.872626 | 1 | 0.900351 | 757.181   | 1345.39 | No change |
| NM_183024    | Raver2        | 0.872851 | 1 | 1.09452  | 5.88635   | 11.9832 | No change |
| NM_172406    | Trak2         | 0.872932 | 1 | 0.98665  | 14.8768   | 28.0721 | No change |
| NM_001160097 | Cldn10        | 0.873874 | 1 | 1.10674  | 19.6537   | 40.3574 | No change |
| NM_016809    | Rbm3          | 0.874136 | 1 | 1.12191  | 6.41656   | 13.3185 | No change |
| NM_020568    | Plin4         | 0.874632 | 1 | 1.05986  | 5.92178   | 11.7635 | No change |
| NM_009143    | Sdf2          | 0.874677 | 1 | 1.05365  | 28.8555   | 57.0704 | No change |
| NM_001172101 | Rnh1          | 0.874886 | 1 | 0.973744 | 74.5778   | 139.461 | No change |
| NM_009555    | Zfp40         | 0.875052 | 1 | 1.12782  | 4.37396   | 9.11687 | No change |
| NM_013875    | Pde7b         | 0.875063 | 1 | 1.24675  | 1.90824   | 4.33146 | No change |
| NM_172863    | Zfp697        | 0.875403 | 1 | 1.10056  | 4.39967   | 8.99472 | No change |
| NM_001164763 | Rarres1       | 0.875524 | 1 | 1.21408  | 6.81618   | 15.1112 | No change |
| NM_030556    | Slc19a3       | 0.875639 | 1 | 1.35155  | 1.54665   | 3.78991 | No change |
| NM_024211    | Slc25a11      | 0.875654 | 1 | 0.996685 | 49.6536   | 94.3538 | No change |
| NM_011950    | Mapk13        | 0.875932 | 1 | 1.36911  | 3.06287   | 7.60322 | No change |
| NM_029701    | Spcc3         | 0.875944 | 1 | 0.975201 | 35.3191   | 66.114  | No change |
| NM_001013814 | Amt           | 0.875995 | 1 | 1.21339  | 7.31118   | 16.2004 | No change |
| NM_008879    | Lcp1          | 0.87604  | 1 | 0.963182 | 42.992    | 79.8043 | No change |
| NM_001164704 | Renbp         | 0.876638 | 1 | 1.1069   | 15.7518   | 32.3477 | No change |
| NM_011975    | Rpl27a        | 0.876958 | 1 | 0.958539 | 163.891   | 303.239 | No change |
| NM_011226    | Rab19         | 0.877802 | 1 | 1.48666  | 2.00479   | 5.43459 | No change |
| NM_145951    | Enox2         | 0.878295 | 1 | 1.16942  | 4.26325   | 9.153   | No change |
| NM_011969    | Psmc7         | 0.878372 | 1 | 0.986543 | 116.524   | 219.855 | No change |
| NM_177611    | Psd4          | 0.878671 | 1 | 1.19914  | 2.30673   | 5.05894 | No change |
| NM_032000    | Trps1         | 0.878722 | 1 | 1.02763  | 5.23278   | 10.1614 | No change |
| NM_023887    | Gcnt2         | 0.87877  | 1 | 1.20943  | 2.5397    | 5.61121 | No change |
| NM_001013785 | Akr1c19       | 0.879257 | 1 | 1.29633  | 4.93799   | 11.6183 | No change |
| NM_007793    | Cstb          | 0.879505 | 1 | 1.10099  | 39.0142   | 79.781  | No change |
| NM_025613    | Eid1          | 0.879507 | 1 | 1.0192   | 23.9253   | 46.1856 | No change |
| NM_009888    | Cfn           | 0.87955  | 1 | 1.00768  | 16.6369   | 31.8578 | No change |
| NM_134133    | 2010002N04Rik | 0.880224 | 1 | 1.18871  | 5.89548   | 12.8327 | No change |
| NM_025500    | Mrpl37        | 0.880512 | 1 | 0.97155  | 97.4117   | 181.877 | No change |
| NM_009530    | Atrx          | 0.881251 | 1 | 0.953176 | 42.29452  | 82.2951 | No change |
| NM_001005421 | Amica1        | 0.881419 | 1 | 1.16749  | 5.58564   | 11.9749 | No change |
| NM_009831    | Ccng1         | 0.881651 | 1 | 0.994418 | 27.0218   | 51.2646 | No change |
| NM_010886    | Ndufa4        | 0.882277 | 1 | 1.02263  | 122.388   | 236.823 | No change |
| NM_026369    | Arpc5         | 0.882386 | 1 | 1.02195  | 32.1095   | 62.1028 | No change |
| NM_027764    | Rcctb1        | 0.882465 | 1 | 1.03333  | 13.3029   | 25.9352 | No change |
| NM_001101584 | Gm6813        | 0.8843   | 1 | 1.05831  | 68.7026   | 136.314 | No change |
| NM_011712    | Wbp5          | 0.885579 | 1 | 1.03891  | 49.2917   | 96.4735 | No change |
| NM_010153    | Erbb3         | 0.885735 | 1 | 1.01846  | 16.7818   | 32.3774 | No change |
| NR_028519    | Scarna6       | 0.885862 | 1 | 1.09016  | 111.846   | 226.952 | No change |
| NM_017391    | Slc5a3        | 0.886249 | 1 | 0.948452 | 28.853    | 53.0094 | No change |
| NM_027570    | Ldhd          | 0.886417 | 1 | 0.952801 | 124.293   | 229.046 | No change |
| NM_178256    | Reps2         | 0.887039 | 1 | 1.03617  | 6.96016   | 13.5961 | No change |
| NM_023149    | Cndp2         | 0.887351 | 1 | 0.966659 | 93.8527   | 174.63  | No change |
| NM_134054    | 1110002B05Rik | 0.888473 | 1 | 1.03243  | 41.8771   | 81.5878 | No change |
| NM_009092    | Rps17         | 0.888694 | 1 | 0.990449 | 244.66    | 462.855 | No change |
| NM_010469    | Hoxd4         | 0.889229 | 1 | 1.0273   | 24.2931   | 47.1593 | No change |
| NM_001162425 | Efna1         | 0.889235 | 1 | 1.28378  | 4.76821   | 11.1135 | No change |
| NM_001177974 | Irak1         | 0.890374 | 1 | 1.03179  | 23.1582   | 45.0977 | No change |
| NM_175027    | Fancb         | 0.890483 | 1 | 1.60689  | 0.720484  | 2.14088 | No change |
| NM_009026    | Rasd1         | 0.890981 | 1 | 1.10217  | 16.0897   | 32.9247 | No change |
| NM_175118    | Dusp28        | 0.891075 | 1 | 1.15711  | 10.704    | 22.7747 | No change |
| NM_177375    | Rab26         | 0.891793 | 1 | 1.10054  | 18.4681   | 37.7478 | No change |
| NR_027826    | 2610017I09Rik | 0.892489 | 1 | 1.2665   | 14.1683   | 32.6084 | No change |
| NM_001081318 | Gm6614        | 0.892931 | 1 | 1.75128  | 0.606646  | 2.02176 | No change |
| NM_019968    | Arl10         | 0.892931 | 1 | 1.75128  | 1.13052   | 3.76766 | No change |
| NM_025623    | Nipsnap3b     | 0.893315 | 1 | 1.15602  | 10.8678   | 23.1046 | No change |
| NM_012026    | Rgntf         | 0.893751 | 1 | 1.01626  | 12.6714   | 24.4082 | No change |
| NM_001163583 | Prom1         | 0.894556 | 1 | 0.944881 | 162.562   | 297.914 | No change |
| NM_001150749 | Rdh7          | 0.894748 | 1 | 2.92121  | 0.0436946 | 0.58513 | No change |
| NM_001044751 | Hsd11b1       | 0.89476  | 1 | 1.62287  | 1.29348   | 3.89068 | No change |
| NM_001177812 | D19Wsu162e    | 0.895338 | 1 | 0.996209 | 30.018    | 57.0159 | No change |
| NM_001110300 | Ap1m2         | 0.895522 | 1 | 1.04004  | 32.5207   | 63.6949 | No change |
| NM_009080    | Rpl26         | 0.89558  | 1 | 0.954813 | 638.659   | 1178.54 | No change |
| NR_003373    | Gm15772       | 0.89558  | 1 | 0.954813 | 666.908   | 1230.66 | No change |
| NM_172693    | Galnt12       | 0.895729 | 1 | 1.12798  | 9.56076   | 19.9239 | No change |

|              |               |          |   |          |         |         |           |
|--------------|---------------|----------|---|----------|---------|---------|-----------|
| NM_145953    | Cth           | 0.895869 | 1 | 1.13661  | 10.9125 | 22.8806 | No change |
| NM_011032    | P4hb          | 0.896235 | 1 | 0.940363 | 247.413 | 451.989 | No change |
| NM_145402    | Tmem51        | 0.896999 | 1 | 1.02479  | 38.7885 | 75.1622 | No change |
| NM_025410    | Lage3         | 0.897215 | 1 | 1.24828  | 11.6461 | 26.4493 | No change |
| NM_026931    | 1810011O10Rik | 0.897703 | 1 | 1.16297  | 12.0431 | 25.7282 | No change |
| NM_009098    | Rps8          | 0.897798 | 1 | 1.00603  | 137.879 | 263.686 | No change |
| NM_008846    | Pip5k1b       | 0.897974 | 1 | 1.06511  | 16.5817 | 33.0534 | No change |
| NM_007995    | Fcna          | 0.898721 | 1 | 1.20229  | 9.15481 | 20.1146 | No change |
| NM_145535    | Sdcbp2        | 0.898726 | 1 | 1.24345  | 6.65182 | 15.0538 | No change |
| NM_013738    | Plek2         | 0.89904  | 1 | 1.10813  | 16.9851 | 34.9003 | No change |
| NM_008126    | Gjb3          | 0.899286 | 1 | 1.08637  | 20.9035 | 42.2965 | No change |
| NM_175328    | Slc6a15       | 0.89969  | 1 | 1.41502  | 1.06269 | 2.72674 | No change |
| NM_010422    | Hexb          | 0.900094 | 1 | 0.990891 | 76.5342 | 144.826 | No change |
| NM_010199    | Fgf12         | 0.900137 | 1 | 1.16643  | 5.20642 | 11.1497 | No change |
| NM_011291    | Rpl7          | 0.900204 | 1 | 0.988206 | 166.323 | 314.143 | No change |
| NM_009478    | Urod          | 0.90049  | 1 | 1.03799  | 52.1389 | 101.968 | No change |
| NR_015601    | C030044B11Rik | 0.901162 | 1 | 1.22077  | 7.39384 | 16.4613 | No change |
| NM_010325    | Got2          | 0.901269 | 1 | 0.969193 | 111.954 | 208.668 | No change |
| NM_027977    | 2310001A20Rik | 0.901275 | 1 | 1.06558  | 19.7941 | 39.4686 | No change |
| NM_172773    | Slc17a5       | 0.901932 | 1 | 1.07049  | 12.8456 | 25.7021 | No change |
| NM_173047    | Cbr3          | 0.902147 | 1 | 1.30368  | 5.67338 | 13.4108 | No change |
| NM_001162537 | 9330159F19Rik | 0.902186 | 1 | 1.17595  | 2.65485 | 5.72394 | No change |
| NM_007962    | Mpzl2         | 0.902191 | 1 | 1.12965  | 6.86961 | 14.3314 | No change |
| NM_010106    | Eef1a1        | 0.902464 | 1 | 0.918673 | 2622.5  | 4719.26 | No change |
| NM_007883    | Dsg2          | 0.903832 | 1 | 1.1377   | 3.63732 | 7.63147 | No change |
| NM_027920    | March8        | 0.903832 | 1 | 0.997519 | 30.2296 | 57.4677 | No change |
| NM_025862    | Acad8         | 0.903996 | 1 | 1.05085  | 19.0669 | 37.6263 | No change |
| NM_010941    | Nsdhl         | 0.904332 | 1 | 1.05001  | 25.0115 | 49.328  | No change |
| NM_134052    | Adi1          | 0.904966 | 1 | 1.12672  | 13.897  | 28.9307 | No change |
| NM_008378    | Impact        | 0.905028 | 1 | 1.05034  | 16.2454 | 32.0466 | No change |
| NM_022891    | Rpl23         | 0.905079 | 1 | 1.01727  | 89.1177 | 171.771 | No change |
| NM_153526    | Insig1        | 0.905284 | 1 | 1.02333  | 32.2146 | 62.3562 | No change |
| NM_019972    | Sort1         | 0.905767 | 1 | 0.952212 | 83.6522 | 154.082 | No change |
| NM_001171187 | Mal           | 0.905782 | 1 | 1.00851  | 43.3912 | 83.1235 | No change |
| NM_031368    | Bglap-rs1     | 0.905888 | 1 | 1.01902  | 152.275 | 293.861 | No change |
| NM_026982    | 1810027O10Rik | 0.906135 | 1 | 1.50617  | 6.30632 | 17.3231 | No change |
| NM_023525    | Cad           | 0.90639  | 1 | 1.00674  | 16.7122 | 31.9756 | No change |
| NM_198657    | Gm5148        | 0.906532 | 1 | 0.975931 | 206.612 | 386.903 | No change |
| NM_009903    | Cldn4         | 0.90699  | 1 | 1.05869  | 28.1541 | 55.8638 | No change |
| NM_011823    | Gpr34         | 0.907237 | 1 | 1.56131  | 1.17501 | 3.36638 | No change |
| NM_001159706 | Folh1         | 0.907587 | 1 | 1.07241  | 14.5863 | 29.2229 | No change |
| NM_134037    | Acly          | 0.907603 | 1 | 0.942428 | 229.383 | 419.643 | No change |
| NM_028725    | Sdr42e1       | 0.907755 | 1 | 1.07746  | 14.2828 | 28.7164 | No change |
| NM_030721    | Acox3         | 0.907916 | 1 | 0.979528 | 59.5279 | 111.751 | No change |
| NM_012010    | Eif2s3x       | 0.908019 | 1 | 1.01874  | 27.0845 | 52.2571 | No change |
| NM_026125    | Fam132a       | 0.908118 | 1 | 1.1982   | 10.0697 | 22.0559 | No change |
| NM_207523    | Rpl23a        | 0.908379 | 1 | 1.00176  | 245.419 | 467.923 | No change |
| NM_013499    | Cr1l          | 0.908957 | 1 | 1.09196  | 20.8408 | 42.3316 | No change |
| NM_001102414 | Slc2a9        | 0.908961 | 1 | 1.31616  | 1.78005 | 4.24527 | No change |
| NM_177271    | Samd5         | 0.909256 | 1 | 1.25234  | 3.71509 | 8.45954 | No change |
| NM_024225    | Snx5          | 0.909345 | 1 | 0.991278 | 74.0722 | 140.199 | No change |
| NM_028454    | Tm7sf2        | 0.909729 | 1 | 1.13907  | 14.6548 | 30.7745 | No change |
| NM_001166378 | Armcx1        | 0.91044  | 1 | 1.10711  | 13.784  | 28.2984 | No change |
| NM_009201    | Slc1a5        | 0.911241 | 1 | 1.04361  | 24.4355 | 47.9734 | No change |
| NM_001037933 | Defb23        | 0.911651 | 1 | 1.01351  | 184.396 | 354.468 | No change |
| NM_173033    | Tstd2         | 0.912062 | 1 | 1.0364   | 20.5618 | 40.1644 | No change |
| NM_011710    | Wars          | 0.912237 | 1 | 0.97894  | 147.445 | 276.68  | No change |
| NM_010240    | Ftl1          | 0.912954 | 1 | 0.973955 | 335.388 | 627.172 | No change |
| NR_028262    | Rmst          | 0.913435 | 1 | 1.08359  | 14.9657 | 30.2179 | No change |
| NM_026347    | Iah1          | 0.913563 | 1 | 1.06375  | 56.1457 | 111.795 | No change |
| NM_023144    | Nono          | 0.913988 | 1 | 1.04057  | 29.9047 | 58.5847 | No change |
| NM_018794    | Atp6ap1       | 0.914675 | 1 | 1.03066  | 40.3067 | 78.4158 | No change |
| NM_001033248 | Gm266         | 0.916156 | 1 | 1.2972   | 6.08021 | 14.2991 | No change |
| NM_025891    | Smarcd3       | 0.91662  | 1 | 1.07256  | 27.8772 | 55.8513 | No change |
| NM_001159529 | Cox7a2l       | 0.916928 | 1 | 0.99492  | 172.018 | 326.402 | No change |
| NM_025436    | Sc4mol        | 0.91766  | 1 | 1.05355  | 34.9611 | 69.1146 | No change |
| NM_025974    | Rpl14         | 0.918622 | 1 | 1.02658  | 109.123 | 211.687 | No change |
| NM_009623    | Adcy8         | 0.919673 | 1 | 1.04269  | 15.5042 | 30.4175 | No change |
| NM_008747    | Ntsr2         | 0.919993 | 1 | 1.02132  | 75.0089 | 144.974 | No change |
| NM_181683    | Defb37        | 0.920987 | 1 | 1.12271  | 80.1865 | 166.425 | No change |
| NM_133888    | Smpd13b       | 0.921271 | 1 | 1.17598  | 9.01483 | 19.4302 | No change |
| NR_030762    | Snord17       | 0.921682 | 1 | 1.00158  | 850.506 | 1621.31 | No change |
| NM_009412    | Tpd52         | 0.921794 | 1 | 1.01799  | 56.8985 | 109.714 | No change |
| NM_133664    | Lad1          | 0.922149 | 1 | 1.22738  | 3.95983 | 8.8539  | No change |
| NM_001167587 | Gm5916        | 0.92281  | 1 | 1.08517  | 38.6912 | 78.2031 | No change |
| NM_145586    | Tmem159       | 0.922941 | 1 | 1.14647  | 16.1514 | 34.0893 | No change |

|              |               |          |   |          |          |          |           |
|--------------|---------------|----------|---|----------|----------|----------|-----------|
| NM_026853    | Asb11         | 0.923089 | 1 | 1.13797  | 19.6046  | 41.1291  | No change |
| NM_027959    | Pdia6         | 0.92335  | 1 | 0.993641 | 114.624  | 217.299  | No change |
| NM_010062    | Dnase2a       | 0.924094 | 1 | 1.22191  | 7.59284  | 16.91    | No change |
| NR_036450    | Gm14403       | 0.924463 | 1 | 1.34832  | 1.5771   | 3.84871  | No change |
| NM_023326    | Bmyc          | 0.925122 | 1 | 1.13738  | 30.1644  | 63.2546  | No change |
| NM_008081    | B4galnt2      | 0.925545 | 1 | 1.05605  | 16.9201  | 33.506   | No change |
| NM_031170    | Krt8          | 0.925755 | 1 | 1.03311  | 57.0671  | 111.206  | No change |
| NM_011804    | Creg1         | 0.927016 | 1 | 1.04634  | 39.0608  | 76.8248  | No change |
| NM_018796    | Eef1b2        | 0.927157 | 1 | 1.05881  | 35.1169  | 69.674   | No change |
| NM_033612    | Cela1         | 0.927669 | 1 | 1.4638   | 3.15068  | 8.37345  | No change |
| NM_009413    | Tpd52l1       | 0.927799 | 1 | 1.07972  | 39.9345  | 80.4036  | No change |
| NM_025718    | Dnase1l2      | 0.928597 | 1 | 1.11694  | 26.2758  | 54.3079  | No change |
| NM_182841    | Tmem150c      | 0.928618 | 1 | 0.99282  | 94.7851  | 179.582  | No change |
| NM_011034    | Prdx1         | 0.928834 | 1 | 1.01995  | 101.416  | 195.817  | No change |
| NM_015828    | Gne           | 0.930282 | 1 | 1.05828  | 13.3457  | 26.4683  | No change |
| NM_009787    | Pdia4         | 0.93137  | 1 | 0.983876 | 176.69   | 332.681  | No change |
| NM_177638    | Crb3          | 0.931721 | 1 | 1.35293  | 5.12448  | 12.5448  | No change |
| NM_172856    | Lass6         | 0.933293 | 1 | 1.08946  | 12.1475  | 24.6245  | No change |
| NM_001034867 | Pm20d2        | 0.933538 | 1 | 1.12685  | 5.5159   | 11.4799  | No change |
| NM_183028    | Pcmt1d1       | 0.933696 | 1 | 1.02828  | 25.4289  | 49.3837  | No change |
| NM_178750    | Ss18l1        | 0.934752 | 1 | 1.0832   | 12.1233  | 24.4671  | No change |
| NM_026142    | 3632451O06Rik | 0.934876 | 1 | 1.41764  | 1.59776  | 4.10159  | No change |
| NM_026582    | Wls           | 0.935104 | 1 | 1.08006  | 20.6901  | 41.6644  | No change |
| NM_007750    | Cox8a         | 0.935818 | 1 | 1.04886  | 169.693  | 334.322  | No change |
| NM_009655    | Alcam         | 0.93682  | 1 | 1.05953  | 15.7684  | 31.2991  | No change |
| NM_024212    | Rpl4          | 0.937126 | 1 | 1.00047  | 210.696  | 401.313  | No change |
| NM_025417    | Comm1d4       | 0.937144 | 1 | 1.19434  | 20.5527  | 44.8694  | No change |
| NM_172780    | Slc9a6        | 0.93765  | 1 | 1.11253  | 7.6838   | 15.8302  | No change |
| NM_011863    | Papss1        | 0.937705 | 1 | 1.09819  | 17.3428  | 35.3709  | No change |
| NR_034050    | Snora44       | 0.937739 | 1 | 1.58098  | 19.657   | 57.0646  | No change |
| NM_001126490 | Ism1          | 0.9378   | 1 | 1.14862  | 8.71162  | 18.4111  | No change |
| NM_001039195 | Gria2         | 0.937921 | 1 | 1.14577  | 7.56621  | 15.9581  | No change |
| NM_019755    | Plp2          | 0.938067 | 1 | 1.15799  | 26.996   | 57.4328  | No change |
| NM_001077354 | C77370        | 0.938259 | 1 | 1.0749   | 5.75975  | 11.5564  | No change |
| NM_001136077 | Enpp2         | 0.93852  | 1 | 1.01302  | 78.5791  | 150.983  | No change |
| NM_001110844 | Cacna2d1      | 0.939574 | 1 | 1.15063  | 3.43966  | 7.2795   | No change |
| NM_146261    | Fam199x       | 0.940555 | 1 | 1.11941  | 4.34268  | 8.9901   | No change |
| NM_026482    | Atp2b1        | 0.941533 | 1 | 1.04091  | 16.8416  | 32.9957  | No change |
| NM_016966    | Phgdh         | 0.941927 | 1 | 1.09461  | 26.6703  | 54.2557  | No change |
| NM_008471    | Krt19         | 0.942455 | 1 | 1.07693  | 47.1557  | 94.7453  | No change |
| NM_027642    | Phf6          | 0.942491 | 1 | 1.03571  | 31.4339  | 61.3607  | No change |
| NM_001145922 | Arhgef40      | 0.943075 | 1 | 1.09996  | 8.61302  | 17.5873  | No change |
| NM_207633    | Yipf6         | 0.944961 | 1 | 1.08741  | 11.0698  | 22.4053  | No change |
| NM_023910    | Tsc22d4       | 0.945301 | 1 | 1.15038  | 11.6755  | 24.7033  | No change |
| NM_001033865 | Rps27a        | 0.94561  | 1 | 1.06023  | 109.251  | 216.947  | No change |
| NM_053179    | Nans          | 0.94594  | 1 | 1.07442  | 37.2989  | 74.8074  | No change |
| NM_022032    | Perp          | 0.946076 | 1 | 1.09868  | 26.2632  | 53.5787  | No change |
| NM_025797    | Cyb5          | 0.946258 | 1 | 1.11148  | 56.5732  | 116.457  | No change |
| NM_008969    | Ptgs1         | 0.946591 | 1 | 1.14698  | 9.92832  | 20.9557  | No change |
| NM_145838    | St8sia6       | 0.94849  | 1 | 1.08964  | 18.5436  | 37.5896  | No change |
| NM_001164306 | Gm4846        | 0.949287 | 1 | 0.977356 | 883.07   | 1655.1   | No change |
| NM_178047    | Prom2         | 0.949326 | 1 | 1.00746  | 84.1133  | 160.986  | No change |
| NM_026572    | Gcsh          | 0.949336 | 1 | 1.12019  | 29.5556  | 61.2129  | No change |
| NM_018853    | Rplp1         | 0.950075 | 1 | 1.0233   | 475.937  | 921.011  | No change |
| NM_139225    | Defb10        | 0.951037 | 1 | 1.66275  | 6.10107  | 18.8542  | No change |
| NM_025412    | Pycl1         | 0.951205 | 1 | 1.19159  | 14.3713  | 31.3057  | No change |
| NM_011376    | Sim1          | 0.95205  | 1 | 1.19751  | 2.52998  | 5.5344   | No change |
| NM_010903    | Nfe2l3        | 0.952932 | 1 | 1.14882  | 11.6977  | 24.7205  | No change |
| NM_134164    | Syt12         | 0.954753 | 1 | 1.11851  | 13.1432  | 27.1872  | No change |
| NM_007399    | Adam10        | 0.954775 | 1 | 1.08312  | 15.4755  | 31.2257  | No change |
| NM_212444    | Gyk           | 0.955028 | 1 | 1.04936  | 30.0528  | 59.2231  | No change |
| NM_001042580 | Cd63          | 0.955238 | 1 | 1.16213  | 28.2479  | 60.2586  | No change |
| NM_008730    | Nptx1         | 0.955908 | 1 | 1.23878  | 2.61151  | 5.88295  | No change |
| NM_001144992 | 2810459M11Rik | 0.956233 | 1 | 1.13278  | 11.068   | 23.1257  | No change |
| NM_152802    | Defb12        | 0.956275 | 1 | 1.02376  | 263.183  | 509.449  | No change |
| NM_175013    | Pgm5          | 0.957564 | 1 | 1.1108   | 6.18251  | 12.7193  | No change |
| NM_013765    | Rps26         | 0.958826 | 1 | 1.06498  | 233.347  | 464.879  | No change |
| NM_001010937 | Gjb6          | 0.958937 | 1 | 1.45489  | 1.98546  | 5.2344   | No change |
| NM_199477    | Mettl7a2      | 0.961035 | 1 | 1.14237  | 19.5877  | 41.2021  | No change |
| NM_025473    | Fam3a         | 0.963302 | 1 | 1.205    | 10.8587  | 23.8761  | No change |
| NM_010495    | Id1           | 0.963647 | 1 | 1.9074   | 1.07102  | 4.01903  | No change |
| NM_013467    | Aldh1a1       | 0.963737 | 1 | 1.02169  | 175.364  | 338.958  | No change |
| NM_026779    | Mocos         | 0.963864 | 1 | 1.39293  | 1.9574   | 4.92878  | No change |
| NR_037274    | Mir3091       | 0.963938 | 1 | 1.41966  | 65.1079  | 167.197  | No change |
| NM_018760    | Slc4a4        | 0.966241 | 1 | 1.14834  | 4.60465  | 9.72609  | No change |
| NM_175460    | Nmnat2        | 0.966365 | 1 | 1.79666  | 0.277354 | 0.952345 | No change |

|              |               |          |   |         |           |          |           |
|--------------|---------------|----------|---|---------|-----------|----------|-----------|
| NM_183185    | Zfp300        | 0.970676 | 1 | 1.6809  | 0.389012  | 1.21758  | No change |
| NM_008049    | Ftl2          | 0.971211 | 1 | 1.04855 | 207.258   | 408.166  | No change |
| NM_001114332 | Slc16a10      | 0.971224 | 1 | 1.04875 | 36.5907   | 72.0705  | No change |
| NM_001002239 | Rpl17         | 0.971296 | 1 | 1.11214 | 75.4482   | 155.346  | No change |
| NM_019865    | Rpl36a        | 0.971301 | 1 | 1.17966 | 53.303    | 115.1    | No change |
| NM_019771    | Dstn          | 0.971444 | 1 | 1.04928 | 103.036   | 203.017  | No change |
| NM_027711    | lqqap2        | 0.973101 | 1 | 1.05543 | 30.2635   | 59.8859  | No change |
| NM_013737    | Pla2g7        | 0.97358  | 1 | 1.15041 | 19.1064   | 40.4129  | No change |
| NM_010877    | Ncf2          | 0.974689 | 1 | 1.1213  | 20.7253   | 42.9474  | No change |
| NM_009095    | Rps5          | 0.975679 | 1 | 1.07428 | 163.496   | 327.813  | No change |
| NM_009419    | Tpst2         | 0.976897 | 1 | 1.10228 | 40.8399   | 83.5055  | No change |
| NM_007418    | Adra2c        | 0.977442 | 1 | 1.37944 | 2.02672   | 5.05096  | No change |
| NM_009031    | Rbbp7         | 0.981799 | 1 | 1.07216 | 63.4966   | 127.119  | No change |
| NM_016785    | Tpmt          | 0.981853 | 1 | 1.12881 | 19.6886   | 41.0121  | No change |
| NM_019804    | B4galt4       | 0.982436 | 1 | 1.13791 | 20.6958   | 43.3867  | No change |
| NM_019946    | Mgst1         | 0.982798 | 1 | 1.09608 | 96.5207   | 196.493  | No change |
| NM_023266    | Zfp120        | 0.982903 | 1 | 1.26092 | 3.52613   | 8.0658   | No change |
| NM_174875    | Atg4a         | 0.983606 | 1 | 1.10665 | 35.069    | 71.922   | No change |
| NM_148947    | Ly6g5c        | 0.983866 | 1 | 1.18128 | 64.5821   | 139.594  | No change |
| NM_013463    | Gla           | 0.9843   | 1 | 1.27849 | 4.16043   | 9.63685  | No change |
| NM_001166398 | Armcx2        | 0.986981 | 1 | 1.11997 | 18.1271   | 37.5244  | No change |
| NM_027054    | Cst12         | 0.987432 | 1 | 1.05657 | 454.025   | 899.096  | No change |
| NM_001190409 | Magt1         | 0.988514 | 1 | 1.0934  | 23.5135   | 47.776   | No change |
| NM_001003951 | Ces5a         | 0.988815 | 1 | 1.03917 | 369.433   | 722.76   | No change |
| NM_033145    | Lcn8          | 0.990795 | 1 | 1.03053 | 1161.8    | 2259.32  | No change |
| NM_008532    | Epcam         | 0.991915 | 1 | 1.11725 | 35.844    | 74.0551  | No change |
| NM_016980    | Rpl5          | 0.993217 | 1 | 1.07161 | 95.0641   | 190.234  | No change |
| NM_001014761 | Scn2b         | 0.993436 | 1 | 1.27644 | 2.99426   | 6.92416  | No change |
| NM_001029978 | Tceal3        | 0.993532 | 1 | 1.29794 | 10.5008   | 24.66    | No change |
| NM_010220    | Fkbp5         | 0.993946 | 1 | 1.07541 | 50.6442   | 101.613  | No change |
| NM_001159483 | Rpl19         | 0.994089 | 1 | 1.07534 | 241.848   | 485.221  | No change |
| NM_198636    | Acss3         | 0.995326 | 1 | 1.17154 | 14.7223   | 31.5996  | No change |
| NM_001081159 | S100z         | 0.996261 | 1 | 1.65301 | 7.2016    | 22.0159  | No change |
| NM_010664    | Krt18         | 0.996709 | 1 | 1.10269 | 74.223    | 151.787  | No change |
| NM_008618    | Mdh1          | 0.99736  | 1 | 1.07267 | 106.212   | 212.696  | No change |
| NM_001205057 | Gm14295       | 0.998235 | 1 | 1.30595 | 9.4538    | 22.3271  | No change |
| NM_009438    | Rpl13a        | 1.00159  | 1 | 1.07676 | 259.765   | 521.669  | Up        |
| NM_026950    | Ociad2        | 1.00163  | 1 | 1.15609 | 21.8166   | 46.3168  | Up        |
| NM_013762    | Rpl3          | 1.00215  | 1 | 1.07882 | 147.221   | 296.078  | Up        |
| NM_144816    | Rhbdl1        | 1.00223  | 1 | 1.27835 | 9.30444   | 21.5419  | Up        |
| NM_011029    | Rpsa          | 1.0027   | 1 | 1.06556 | 160.919   | 320.648  | Up        |
| NM_133681    | Tspan1        | 1.00693  | 1 | 1.23471 | 10.8906   | 24.4403  | Up        |
| NM_011287    | Rpl10a        | 1.00807  | 1 | 1.09917 | 169.866   | 346.5    | Up        |
| NM_145422    | D10Wsu52e     | 1.00822  | 1 | 1.07078 | 152.592   | 305.157  | Up        |
| NM_016861    | Pdlim1        | 1.01098  | 1 | 1.16506 | 31.9986   | 68.3565  | Up        |
| NM_146256    | Hpd1          | 1.01146  | 1 | 1.1867  | 23.057    | 50.0117  | Up        |
| NM_001163085 | Map3k15       | 1.01199  | 1 | 1.24553 | 4.68039   | 10.5837  | Up        |
| NM_026069    | Rpl37         | 1.01263  | 1 | 1.20188 | 36.3336   | 79.6573  | Up        |
| NM_026680    | Golt1a        | 1.01282  | 1 | 1.46319 | 2.72415   | 7.21028  | Up        |
| NR_033727    | Rps27         | 1.01302  | 1 | 1.25374 | 33.2102   | 75.5366  | Up        |
| NM_053188    | Srd5a2        | 1.01317  | 1 | 1.15847 | 63.5724   | 135.176  | Up        |
| NM_053103    | Entpd7        | 1.01327  | 1 | 1.28231 | 2.49973   | 5.80261  | Up        |
| NM_031256    | Plekha3       | 1.01352  | 1 | 1.10284 | 48.741    | 99.6765  | Up        |
| NM_153803    | Glb1l2        | 1.01384  | 1 | 1.05347 | 205.467   | 405.972  | Up        |
| NM_016783    | Pgrmc1        | 1.01386  | 1 | 1.0637  | 259.623   | 516.637  | Up        |
| NM_008127    | Gjb4          | 1.01394  | 1 | 1.49951 | 2.94205   | 7.99886  | Up        |
| NM_008289    | Hsd11b2       | 1.01431  | 1 | 3.02075 | 0.0376922 | 0.543577 | Up        |
| NM_027127    | Gpx8          | 1.01562  | 1 | 1.18135 | 40.7457   | 88.0429  | Up        |
| NM_001034871 | Gm749         | 1.01648  | 1 | 1.12503 | 221.793   | 460.659  | Up        |
| NM_009978    | Cst8          | 1.01753  | 1 | 1.07074 | 594.224   | 1188.28  | Up        |
| NM_145216    | Rasl10a       | 1.01964  | 1 | 1.41203 | 6.10128   | 15.5504  | Up        |
| NM_153535    | Fam149a       | 1.02005  | 1 | 1.42624 | 1.1448    | 2.94816  | Up        |
| NM_027409    | Mospd1        | 1.02058  | 1 | 1.1653  | 31.169    | 66.5899  | Up        |
| NM_130450    | Elovl6        | 1.02086  | 1 | 1.10109 | 30.5763   | 62.4505  | Up        |
| NM_001081147 | Oxtr          | 1.02114  | 1 | 1.17078 | 11.168    | 23.9513  | Up        |
| NM_009983    | Ctsd          | 1.02321  | 1 | 1.07677 | 210.755   | 423.214  | Up        |
| NM_173733    | Suox          | 1.02343  | 1 | 1.10969 | 66.815    | 137.286  | Up        |
| NM_001159544 | Frk           | 1.02477  | 1 | 1.21255 | 6.64571   | 14.6781  | Up        |
| NM_013492    | Clu           | 1.02482  | 1 | 1.04576 | 1506.57   | 2960.78  | Up        |
| NM_178244    | Teddm1        | 1.02511  | 1 | 1.05837 | 759.727   | 1506.19  | Up        |
| NM_001037751 | Defb48        | 1.02683  | 1 | 1.06611 | 1727.13   | 3442.58  | Up        |
| NM_018883    | Camkk1        | 1.02763  | 1 | 1.51985 | 1.1915    | 3.28687  | Up        |
| NM_177814    | Erc2          | 1.02839  | 1 | 1.27993 | 2.85279   | 6.60907  | Up        |
| NM_027870    | Armcx3        | 1.02981  | 1 | 1.14319 | 26.5389   | 55.8209  | Up        |
| NM_001081108 | 0910001L09Rik | 1.03019  | 1 | 1.21182 | 38.939    | 85.9527  | Up        |
| NM_001201391 | Beta-s        | 1.03042  | 1 | 1.23762 | 40.6815   | 91.452   | Up        |

|              |               |         |   |         |          |         |    |
|--------------|---------------|---------|---|---------|----------|---------|----|
| NM_001017959 | Lamp2         | 1.03096 | 1 | 1.10711 | 114.079  | 233.97  | Up |
| NM_030706    | Trim2         | 1.03151 | 1 | 1.16018 | 12.0494  | 25.6477 | Up |
| NM_008810    | Pdha1         | 1.03386 | 1 | 1.14208 | 35.7426  | 75.1192 | Up |
| NM_144804    | Depdc7        | 1.03446 | 1 | 1.21654 | 19.7214  | 43.6753 | Up |
| NM_001080550 | Wfdc8         | 1.03552 | 1 | 1.11895 | 93.3512  | 193.043 | Up |
| NM_028440    | 3110003A17Rik | 1.03623 | 1 | 1.21033 | 46.0025  | 101.43  | Up |
| NM_001081201 | Dpy19l4       | 1.03659 | 1 | 1.12052 | 55.4227  | 114.736 | Up |
| NM_001190258 | Gm9846        | 1.03684 | 1 | 1.28256 | 52.7242  | 122.357 | Up |
| NM_030061    | Spink12       | 1.03742 | 1 | 1.16168 | 83.4594  | 177.826 | Up |
| NM_001142959 | Bcl2l15       | 1.03761 | 1 | 1.29233 | 22.8532  | 53.4055 | Up |
| NM_018731    | Atp4a         | 1.03877 | 1 | 1.22908 | 8.97698  | 20.0565 | Up |
| NM_012052    | Rps3          | 1.03944 | 1 | 1.09863 | 178.5    | 363.924 | Up |
| NM_029730    | Mospd2        | 1.03948 | 1 | 1.1956  | 23.1042  | 50.414  | Up |
| NM_025840    | Bzw2          | 1.0397  | 1 | 1.31339 | 7.7478   | 18.3794 | Up |
| NM_011149    | Ppib          | 1.04124 | 1 | 1.14358 | 114.993  | 241.921 | Up |
| NM_011282    | Ros1          | 1.04144 | 1 | 1.09979 | 46.5938  | 95.0714 | Up |
| NM_001136484 | Gcnt1         | 1.04202 | 1 | 1.15723 | 18.8638  | 40.0661 | Up |
| NM_138587    | Fam3c         | 1.04306 | 1 | 1.1229  | 66.7159  | 138.34  | Up |
| NM_025360    | Tmed3         | 1.04308 | 1 | 1.12639 | 126.595  | 263.143 | Up |
| NM_019487    | Hebp2         | 1.04453 | 1 | 1.26721 | 11.6763  | 26.7995 | Up |
| NM_010281    | Ggh           | 1.04469 | 1 | 1.30931 | 11.7206  | 27.7202 | Up |
| NM_007431    | Alpl          | 1.04555 | 1 | 1.14844 | 43.3503  | 91.5078 | Up |
| NM_025468    | Sec11c        | 1.04621 | 1 | 1.18299 | 79.1965  | 171.273 | Up |
| NM_007631    | Ccnd1         | 1.04698 | 1 | 1.18065 | 16.8357  | 36.3494 | Up |
| NM_177305    | Arl4c         | 1.04733 | 1 | 1.13632 | 36.9376  | 77.312  | Up |
| NM_001110784 | Xlr3a         | 1.04798 | 1 | 1.44487 | 3.97762  | 10.3742 | Up |
| NM_001167622 | Gm3867        | 1.04834 | 1 | 1.21928 | 42.8701  | 95.1091 | Up |
| NM_007470    | Apod          | 1.04842 | 1 | 1.13588 | 81.4831  | 170.494 | Up |
| NM_011254    | Rbp1          | 1.04946 | 1 | 1.23476 | 12.4158  | 27.8474 | Up |
| NM_170597    | Creg2         | 1.04981 | 1 | 1.33101 | 2.35555  | 5.65761 | Up |
| NM_024434    | Lap3          | 1.05059 | 1 | 1.13268 | 76.0566  | 158.783 | Up |
| NM_203508    | Eddm3b        | 1.05236 | 1 | 1.15517 | 88.0302  | 186.691 | Up |
| NM_001033543 | Il20rb        | 1.05617 | 1 | 1.33124 | 5.76556  | 13.8483 | Up |
| NM_009079    | Rpl22         | 1.05655 | 1 | 1.15531 | 57.975   | 122.96  | Up |
| NM_013797    | Slco1a1       | 1.05901 | 1 | 1.73053 | 0.509477 | 1.64683 | Up |
| NM_001033636 | Prex2         | 1.06017 | 1 | 1.20943 | 7.77209  | 17.1213 | Up |
| NM_001039122 | Defb25        | 1.06844 | 1 | 1.11734 | 1670.25  | 3449.64 | Up |
| NM_001081643 | Xlr3b         | 1.06855 | 1 | 1.4951  | 3.44801  | 9.3235  | Up |
| NM_008409    | Itm2a         | 1.06855 | 1 | 1.4951  | 3.41632  | 9.23781 | Up |
| NM_001168230 | Morf4l2       | 1.07009 | 1 | 1.12586 | 217.861  | 452.633 | Up |
| NM_020578    | Ehd3          | 1.07132 | 1 | 1.23876 | 10.936   | 24.5911 | Up |
| NM_178712    | Gpr64         | 1.07169 | 1 | 1.11653 | 123.518  | 254.959 | Up |
| NM_022413    | Trpv6         | 1.07222 | 1 | 1.25406 | 11.5203  | 26.1861 | Up |
| NM_027416    | Calml3        | 1.07327 | 1 | 1.18303 | 66.6139  | 144.035 | Up |
| NM_026155    | Ssr3          | 1.07334 | 1 | 1.12396 | 158.011  | 327.85  | Up |
| NM_001177848 | Wfdc6a        | 1.07342 | 1 | 1.19902 | 89.6052  | 195.931 | Up |
| NM_153319    | Amot          | 1.07435 | 1 | 1.16276 | 23.1689  | 49.3908 | Up |
| NM_001109043 | Zfp185        | 1.07474 | 1 | 1.14664 | 63.1041  | 133.017 | Up |
| NM_001025612 | Snx22         | 1.0757  | 1 | 1.16654 | 54.6087  | 116.72  | Up |
| NM_001166480 | Ssr4          | 1.07579 | 1 | 1.2615  | 40.1341  | 91.7031 | Up |
| NM_029325    | Spinl1        | 1.07785 | 1 | 1.19663 | 106.986  | 233.535 | Up |
| NM_001178001 | Gm6654        | 1.07881 | 1 | 1.20147 | 115.799  | 253.632 | Up |
| NM_023788    | Mageh1        | 1.07891 | 1 | 1.30954 | 14.7063  | 34.7657 | Up |
| NM_008548    | Man1a         | 1.07934 | 1 | 1.11879 | 193.595  | 400.231 | Up |
| NM_013657    | Sema3c        | 1.08031 | 1 | 1.17136 | 28.0038  | 60.0552 | Up |
| NM_009037    | Rcn1          | 1.08059 | 1 | 1.14382 | 94.8352  | 199.505 | Up |
| NM_010730    | Anxa1         | 1.08108 | 1 | 1.20877 | 49.9091  | 109.874 | Up |
| NM_001081556 | Ano3          | 1.08173 | 1 | 1.28719 | 11.3433  | 26.3919 | Up |
| NM_009770    | Btg3          | 1.08239 | 1 | 1.18134 | 84.2938  | 182.036 | Up |
| NR_002700    | Gm7334        | 1.08239 | 1 | 1.18134 | 86.2181  | 186.191 | Up |
| NM_008131    | Glul          | 1.08276 | 1 | 1.10763 | 683.527  | 1402.17 | Up |
| NM_025379    | Cox7b         | 1.08364 | 1 | 1.29455 | 24.7163  | 57.8057 | Up |
| NM_016959    | Rps3a         | 1.08543 | 1 | 1.1521  | 276.407  | 584.834 | Up |
| NM_148939    | Ly6g5b        | 1.08571 | 1 | 1.12963 | 573.728  | 1195.06 | Up |
| NM_019799    | Rhcg          | 1.08625 | 1 | 1.16203 | 96.2029  | 204.965 | Up |
| NM_008324    | Ido1          | 1.08804 | 1 | 1.157   | 156.462  | 332.178 | Up |
| NM_008939    | Prss12        | 1.08897 | 1 | 1.3782  | 4.89214  | 12.1442 | Up |
| NM_009199    | Slc1a1        | 1.09192 | 1 | 1.16608 | 56.5738  | 120.871 | Up |
| NM_178924    | Upk1b         | 1.09327 | 1 | 1.24957 | 25.9231  | 58.7233 | Up |
| NM_027334    | Mettl7a1      | 1.09395 | 1 | 1.14672 | 221.663  | 467.232 | Up |
| NM_010082    | Adam28        | 1.09424 | 1 | 1.13131 | 273.394  | 570.127 | Up |
| NM_001166454 | Pls3          | 1.09649 | 1 | 1.14039 | 197.444  | 414.352 | Up |
| NM_010893    | Neu1          | 1.10043 | 1 | 1.25062 | 12.9068  | 29.2572 | Up |
| NM_021351    | Cryba4        | 1.10073 | 1 | 1.20095 | 151.063  | 330.697 | Up |
| NM_177840    | Lcn6          | 1.10277 | 1 | 1.29129 | 42.6965  | 99.6001 | Up |
| NM_001039168 | Rbfox3        | 1.10466 | 1 | 1.52244 | 1.31436  | 3.62136 | Up |



|              |               |         |   |         |          |            |
|--------------|---------------|---------|---|---------|----------|------------|
| NM_029959    | Lcn9          | 1.10739 | 1 | 1.14882 | 807.491  | 1704.5 Up  |
| NM_207276    | Defb21        | 1.10814 | 1 | 1.22547 | 193.046  | 429.903 Up |
| NM_008819    | Pemt          | 1.10841 | 1 | 1.24309 | 74.3726  | 167.684 Up |
| NM_001162863 | Rnase10       | 1.10973 | 1 | 1.13709 | 1025.92  | 2147.97 Up |
| NM_010860    | Myl6          | 1.10991 | 1 | 1.21584 | 164.925  | 364.801 Up |
| NM_177751    | Cnksr2        | 1.11108 | 1 | 1.20331 | 24.6248  | 53.9923 Up |
| NM_008143    | Gnb2l1        | 1.11137 | 1 | 1.20855 | 96.2029  | 211.709 Up |
| NM_010279    | Gfra1         | 1.11834 | 1 | 1.19154 | 66.4072  | 144.406 Up |
| NM_033373    | Krt23         | 1.11876 | 1 | 1.27496 | 29.6614  | 68.3857 Up |
| NM_008491    | Lcn2          | 1.1191  | 1 | 1.14631 | 1845.68  | 3889.08 Up |
| NM_009749    | Bex2          | 1.11989 | 1 | 1.32825 | 27.8926  | 66.7767 Up |
| NM_016773    | Nucb2         | 1.12052 | 1 | 1.27182 | 30.6579  | 70.5259 Up |
| NM_001101442 | 9230113P08Rik | 1.12152 | 1 | 1.16078 | 378.734  | 806.104 Up |
| NM_010720    | Lipg          | 1.12493 | 1 | 1.19662 | 58.8903  | 128.511 Up |
| NM_011990    | Slc7a11       | 1.1268  | 1 | 1.23792 | 9.91729  | 22.2757 Up |
| NM_007805    | Cyb561        | 1.12888 | 1 | 1.17968 | 180.711  | 389.714 Up |
| NM_021492    | Ap3b2         | 1.12931 | 1 | 1.32042 | 7.89219  | 18.7871 Up |
| NM_139198    | Plac8         | 1.13011 | 1 | 1.24262 | 128.071  | 288.608 Up |
| NM_001013773 | BC055004      | 1.13143 | 1 | 1.37195 | 8.04845  | 19.8729 Up |
| NM_029960    | 9230104L09Rik | 1.13231 | 1 | 1.16476 | 1673.37  | 3571.44 Up |
| NM_013757    | Sytl4         | 1.13268 | 1 | 1.19347 | 83.4294  | 181.656 Up |
| NM_008469    | Krt15         | 1.133   | 1 | 1.62353 | 2.35011  | 6.9704 Up  |
| NM_139222    | Defb15        | 1.135   | 1 | 1.21489 | 539.647  | 1192.68 Up |
| NM_033037    | Cdo1          | 1.13528 | 1 | 1.1907  | 244.745  | 531.863 Up |
| NM_001045554 | Wfdc15b       | 1.13616 | 1 | 1.28626 | 91.038   | 211.532 Up |
| NM_001007578 | Armcx6        | 1.13757 | 1 | 1.26807 | 32.3109  | 74.1205 Up |
| NM_007914    | Ehf           | 1.13782 | 1 | 1.22711 | 32.4715  | 72.3801 Up |
| NM_001025353 | Gm6040        | 1.14008 | 1 | 1.29864 | 51.3955  | 120.461 Up |
| NM_183160    | E030010A14Rik | 1.1436  | 1 | 1.53452 | 2.68921  | 7.46486 Up |
| NM_197996    | Tspan15       | 1.14454 | 1 | 1.27071 | 19.5063  | 44.827 Up  |
| NM_008410    | Itm2b         | 1.14549 | 1 | 1.16498 | 1725.33  | 3682.81 Up |
| NM_001001179 | BC048546      | 1.14611 | 1 | 1.33393 | 6.6014   | 15.8619 Up |
| NM_008430    | Kcnk1         | 1.15295 | 1 | 1.23528 | 72.6889  | 162.94 Up  |
| NM_009121    | Sat1          | 1.15555 | 1 | 1.24759 | 119.634  | 270.488 Up |
| NM_001033459 | Gm1679        | 1.1556  | 1 | 1.30258 | 74.8818  | 175.966 Up |
| NM_001159904 | Klrb1c        | 1.1567  | 1 | 1.2341  | 72.0231  | 161.311 Up |
| NM_021475    | Adamdec1      | 1.15814 | 1 | 1.49663 | 3.72736  | 10.0603 Up |
| NM_145933    | St6gal1       | 1.15941 | 1 | 1.20446 | 126.141  | 276.739 Up |
| NM_016675    | Cldn2         | 1.16026 | 1 | 1.2169  | 116.178  | 257.099 Up |
| NM_023270    | Rnf128        | 1.16174 | 1 | 1.24833 | 54.842   | 124.055 Up |
| NM_024181    | Dnajc10       | 1.16211 | 1 | 1.21238 | 111.743  | 246.505 Up |
| NM_052835    | Rpl10         | 1.1644  | 1 | 1.21953 | 472.86   | 1048.33 Up |
| NM_001159900 | Hopx          | 1.16448 | 1 | 1.34115 | 31.7245  | 76.5987 Up |
| NM_172479    | Slc38a5       | 1.16462 | 1 | 1.21061 | 292.342  | 644.105 Up |
| NM_029863    | 9230110F15Rik | 1.16608 | 1 | 1.2107  | 507.131  | 1117.41 Up |
| NM_007663    | Cdh16         | 1.16647 | 1 | 1.25006 | 56.5829  | 128.144 Up |
| NM_007966    | Evx1          | 1.16796 | 1 | 2.02639 | 0.387587 | 1.57207 Up |
| NM_001008426 | Gm5531        | 1.16849 | 1 | 1.20912 | 274.911  | 605.067 Up |
| NM_001081135 | Prrg3         | 1.1702  | 1 | 1.2333  | 48.4471  | 108.441 Up |
| NM_008096    | Gc            | 1.17137 | 1 | 1.33    | 24.1156  | 57.7656 Up |
| NM_008878    | Serpinf2      | 1.17228 | 1 | 1.29639 | 32.9706  | 77.1294 Up |
| NM_019443    | Ndufa1        | 1.17239 | 1 | 1.33288 | 86.5154  | 207.655 Up |
| NM_008220    | Hbb-b1        | 1.17245 | 1 | 1.39133 | 35.8484  | 89.6814 Up |
| NM_016956    | Hbb-b2        | 1.17245 | 1 | 1.39133 | 36.7887  | 92.0337 Up |
| NM_026055    | Rpl39         | 1.17289 | 1 | 1.29071 | 203.949  | 475.205 Up |
| NM_080462    | Hnmt          | 1.17318 | 1 | 1.52007 | 5.18764  | 14.2355 Up |
| NM_177142    | Lipi          | 1.17763 | 1 | 1.32852 | 33.0827  | 79.1567 Up |
| NM_021278    | Tmsb4x        | 1.17807 | 1 | 1.21595 | 1191.44  | 2634.73 Up |
| NM_001177417 | Gm6792        | 1.18265 | 1 | 1.25605 | 280.918  | 638.815 Up |
| NM_007763    | Crip1         | 1.18369 | 1 | 1.29382 | 205.805  | 480.534 Up |
| NM_009738    | Bche          | 1.18904 | 1 | 1.39106 | 4.25409  | 10.6374 Up |
| NM_019435    | Ndufb11       | 1.19168 | 1 | 1.3455  | 54.3327  | 131.547 Up |
| NM_183136    | Spink8        | 1.19386 | 1 | 1.24442 | 654.949  | 1477.27 Up |
| NM_018778    | Cldn8         | 1.19609 | 1 | 1.35958 | 17.3198  | 42.35 Up   |
| NR_002905    | Snora74a      | 1.1976  | 1 | 1.30851 | 456.524  | 1076.86 Up |
| NM_030059    | Cst11         | 1.20429 | 1 | 1.24014 | 1463.9   | 3291.96 Up |
| NM_030033    | Crisp4        | 1.20645 | 1 | 1.29501 | 119.682  | 279.635 Up |
| NM_001159543 | Dpp4          | 1.20759 | 1 | 1.34455 | 16.0404  | 38.8033 Up |
| NM_023409    | Npc2          | 1.21718 | 1 | 1.25437 | 251.852  | 571.973 Up |
| NM_001111048 | Fga           | 1.21915 | 1 | 1.5222  | 4.25182  | 11.6705 Up |
| NM_172908    | Ovch2         | 1.21942 | 1 | 1.26405 | 295.434  | 675.484 Up |
| NM_134163    | Mbnl3         | 1.22352 | 1 | 1.29719 | 23.807   | 55.704 Up  |
| NM_001033135 | Rnf149        | 1.22541 | 1 | 1.27642 | 178.432  | 411.491 Up |
| NM_001012725 | Wfdc6b        | 1.22636 | 1 | 1.35176 | 86.6196  | 210.569 Up |
| NM_027322    | Prrg1         | 1.23251 | 1 | 1.31046 | 47.1053  | 111.239 Up |
| NM_001177509 | Gm1110        | 1.23734 | 1 | 1.26844 | 489.539  | 1122.66 Up |

|              |               |         |   |         |          |            |
|--------------|---------------|---------|---|---------|----------|------------|
| NM_198302    | Rbm11         | 1.2396  | 1 | 1.32245 | 60.0614  | 143.023 Up |
| NM_001005370 | Spin2         | 1.24607 | 1 | 1.4951  | 12.914   | 34.7411 Up |
| NM_001039125 | Defb47        | 1.24654 | 1 | 1.32602 | 490.568  | 1171.05 Up |
| NM_178036    | Lcn10         | 1.24784 | 1 | 1.324   | 173.539  | 413.674 Up |
| NM_183124    | Defb41        | 1.24982 | 1 | 1.37198 | 156.475  | 385.743 Up |
| NM_178656    | Pirt          | 1.2537  | 1 | 2.02532 | 0.462461 | 1.8579 Up  |
| NM_009060    | Rgn           | 1.25805 | 1 | 1.70567 | 3.05515  | 9.57821 Up |
| NM_001159902 | Klrp1a        | 1.26335 | 1 | 1.42502 | 35.0541  | 89.6929 Up |
| NM_178396    | Car12         | 1.26561 | 1 | 1.49468 | 5.38264  | 14.4702 Up |
| NM_001160414 | Wfdc9         | 1.26612 | 1 | 1.39822 | 115.381  | 289.69 Up  |
| NM_001011875 | Rnase12       | 1.26897 | 1 | 1.36516 | 271.612  | 666.279 Up |
| NM_008918    | Ppy           | 1.26926 | 1 | 1.67123 | 12.6318  | 38.5876 Up |
| NM_172979    | Muc15         | 1.27085 | 1 | 1.32248 | 263.816  | 628.137 Up |
| NM_001164742 | Serpina1f     | 1.27239 | 1 | 1.31701 | 197.06   | 467.409 Up |
| NM_009094    | Rps4x         | 1.27341 | 1 | 1.34542 | 244.164  | 590.718 Up |
| NM_001033418 | Bsph1         | 1.27394 | 1 | 1.39952 | 83.9368  | 210.919 Up |
| NM_183032    | Rnase9        | 1.27504 | 1 | 1.306   | 988.677  | 2327.13 Up |
| NM_026887    | Ap1s2         | 1.28847 | 1 | 1.31601 | 464.693  | 1101.4 Up  |
| NM_010742    | Ly6d          | 1.28928 | 1 | 1.84746 | 4.23604  | 14.753 Up  |
| NM_007617    | Cav3          | 1.29835 | 1 | 2.32031 | 0.722831 | 3.66091 Up |
| NM_177829    | Spink10       | 1.29915 | 1 | 1.50333 | 22.2281  | 60.0894 Up |
| NM_183175    | C1qtnf9       | 1.303   | 1 | 1.55774 | 8.34997  | 23.465 Up  |
| NM_053110    | Gpnmb         | 1.30468 | 1 | 1.48203 | 8.88135  | 23.6468 Up |
| NM_001034905 | Spag11b       | 1.30613 | 1 | 1.32603 | 1626.69  | 3882.32 Up |
| NM_007576    | C4bp          | 1.31077 | 1 | 1.34409 | 533.338  | 1288.96 Up |
| NM_007675    | Ceacam10      | 1.32003 | 1 | 1.40404 | 147.691  | 372.163 Up |
| NM_008411    | Cuzd1         | 1.32169 | 1 | 1.34764 | 734.463  | 1779.37 Up |
| NM_029958    | Lcn12         | 1.33149 | 1 | 1.41901 | 198.664  | 505.846 Up |
| NM_153115    | Spag11a       | 1.34204 | 1 | 1.43346 | 298.638  | 768.081 Up |
| NM_009027    | Rasgrf2       | 1.34731 | 1 | 1.77188 | 0.732089 | 2.4013 Up  |
| NM_001145899 | Slc15a2       | 1.34845 | 1 | 1.60152 | 14.6823  | 42.533 Up  |
| NM_001167673 | Pate-e        | 1.35024 | 1 | 1.48694 | 88.7691  | 237.033 Up |
| NM_001168423 | Spink13       | 1.35211 | 1 | 1.66034 | 13.2373  | 40.0043 Up |
| NM_011491    | Stc2          | 1.35292 | 1 | 1.87088 | 1.9046   | 6.72665 Up |
| NM_001034910 | Defb42        | 1.35463 | 1 | 1.3987  | 923.148  | 2317.19 Up |
| NM_001168620 | Enpp5         | 1.35503 | 1 | 1.39612 | 266.506  | 667.753 Up |
| NM_001039566 | Defb30        | 1.36155 | 1 | 1.40519 | 576.045  | 1452.44 Up |
| NM_011702    | Vip           | 1.36228 | 1 | 1.69882 | 5.70505  | 17.7244 Up |
| NM_001001444 | Defb29        | 1.37156 | 1 | 1.52889 | 105.142  | 289.114 Up |
| NM_183038    | Defb39        | 1.37714 | 1 | 1.47489 | 446.643  | 1182.27 Up |
| NM_001039501 | Wfdc10        | 1.38084 | 1 | 1.44251 | 623.289  | 1612.87 Up |
| NM_008813    | Enpp1         | 1.38757 | 1 | 1.44803 | 92.2394  | 239.6 Up   |
| NM_001048217 | Spink11       | 1.41926 | 1 | 1.4551  | 1136.48  | 2966.33 Up |
| NM_001040027 | Gm15386       | 1.43653 | 1 | 1.53771 | 405.09   | 1120.05 Up |
| NM_026593    | D730048I06Rik | 1.43918 | 1 | 1.47625 | 591.711  | 1567.24 Up |
| NM_176950    | Defb20        | 1.44076 | 1 | 1.46586 | 2505.71  | 6588.95 Up |
| NM_001081180 | Spink5        | 1.4489  | 1 | 1.50757 | 65.5245  | 177.376 Up |
| NM_009349    | Inmt          | 1.45452 | 1 | 1.61211 | 40.8075  | 118.88 Up  |
| NM_001012640 | AY761185      | 1.4634  | 1 | 1.59466 | 124.759  | 358.955 Up |
| NM_007402    | Adam7         | 1.47889 | 1 | 1.49035 | 2382.66  | 6372.55 Up |
| NM_001193274 | BC048679      | 1.49601 | 1 | 1.61258 | 111.307  | 324.204 Up |
| NM_001037752 | Defb45        | 1.51254 | 1 | 1.63313 | 184.111  | 543.983 Up |
| NM_011921    | Aldh1a7       | 1.53387 | 1 | 1.60677 | 96.1154  | 278.73 Up  |
| NM_001042630 | Lcn5          | 1.53573 | 1 | 1.59325 | 350.068  | 1005.62 Up |
| NM_001039123 | Defb18        | 1.62037 | 1 | 1.69984 | 633.99   | 1961.17 Up |
| NM_010030    | Defb2         | 1.66041 | 1 | 1.99711 | 27.0519  | 103.436 Up |
| NM_001083884 | 2210415F13Rik | 1.82442 | 1 | 1.87428 | 366.014  | 1277.53 Up |
| NM_183123    | Spinkl        | 3.59708 | 1 | 3.91832 | 12.4578  | 180.87 Up  |
