# Supplementary material for: Knockout of glutathione peroxidase 5 down-regulates the piRNAs in the caput epididymidis of aged mice
Source: PubMed Central journal article supplement — Asian J Androl. 2020 Apr 7;22(6):590–601. doi: 10.4103/aja.aja_3_20 (PMC7705982; doi:10.4103/aja.aja_3_20), 2020-04-07
Supplement: AJA-22-590_Suppl3.pdf [file AJA-22-590_Suppl3.pdf]

| Gene Symbol  | Gene Name | RPKM      |               |
|--------------|-----------|-----------|---------------|
|              |           | WT Caput  | Gpx5 KO Caput |
| NM_007492    | Arx       | 0.306455  | 0.31568       |
| NM_001076789 | Cbx5      | 33.9239   | 46.5446       |
| NM_013932    | Ddx25     | 137.93    | 1.41439       |
| NM_001145885 | Ddx4      | 102.423   | 0.781158      |
| NM_001163770 | Dom3z     | 11.174    | 8.88085       |
| NM_153402    | Eif2c3    | 4.3541    | 4.35353       |
| NM_033571    | Fkbp6     | 12.8487   | 0             |
| NM_023729    | Asz1      | 8.251     | 0.330073      |
| NM_008149    | Gpam      | 15.639    | 23.0864       |
| NM_001081089 | Gpat2     | 6.0199    | 0.95612       |
| NM_028797    | Gtsf1     | 173.557   | 0.994335      |
| NM_010480    | Hsp90aa1  | 358.197   | 86.6782       |
| NM_175296    | Mael      | 305.774   | 1.67172       |
| NM_001163441 | Mov10     | 2.99776   | 2.05176       |
| NM_031260    | Mov10l1   | 7.49904   | 0.177174      |
| NM_010916    | Nhlh1     | 0.0280229 | 0             |
| NM_021311    | Piwil1    | 20.8867   | 0.0364052     |
| NM_021308    | Piwil2    | 26.47     | 0.292249      |
| NM_177905    | Piwil4    | 2.24645   | 4.43759       |
| NM_183139    | Pld6      | 9.73101   | 0.0811656     |
| NM_001033043 | Rnf17     | 10.8324   | 0.181326      |
| NM_018877    | Setdb1    | 15.7269   | 12.0221       |
| NM_001081024 | Setdb2    | 5.67375   | 2.79213       |
| NM_029916    | Stk31     | 10.7187   | 0.177371      |
| NM_001002238 | Tdrd1     | 13.4309   | 0.774302      |
| NM_028034    | Tdrd12    | 18.3154   | 0.132864      |
| NM_001134741 | Tdrd5     | 16.8162   | 1.25071       |
| NM_001161366 | Tdrd6     | 83.4598   | 0.569286      |
| NM_146142    | Tdrd7     | 37.6858   | 8.30403       |
| NM_029056    | Tdrd9     | 8.65184   | 0.283641      |
| NM_028307    | Tdrkh     | 4.60236   | 2.384         |
| NM_027432    | Wdr77     | 9.6507    | 8.99155       |
