# Supplementary material for: Knockout of glutathione peroxidase 5 down-regulates the piRNAs in the caput epididymidis of aged mice
Source: PubMed Central journal article supplement — Asian J Androl. 2020 Apr 7;22(6):590–601. doi: 10.4103/aja.aja_3_20 (PMC7705982; doi:10.4103/aja.aja_3_20), 2020-04-07
Supplement: AJA-22-590_Suppl4.pdf [file AJA-22-590_Suppl4.pdf]

| PIWIL1     | PIWIL2     | PIWIL4     |
|------------|------------|------------|
| piR-105446 | piR-105094 | piR-503    |
| piR-140809 | piR-125210 | piR-6827   |
| piR-121202 | piR-101146 | piR-7877   |
| piR-115763 | piR-138503 | piR-118717 |
| piR-101221 | piR-8697   | piR-137817 |
| piR-30000  | piR-16721  | piR-142502 |
| piR-125916 | piR-108787 | piR-134955 |
| piR-115919 | piR-110275 | piR-104369 |
| piR-119508 | piR-104940 | piR-117558 |
| piR-131977 | piR-15299  | piR-118311 |
| piR-106454 | piR-136523 | piR-108718 |
| piR-125360 | piR-6348   | piR-22850  |
| piR-6713   | piR-141911 | piR-9135   |
| piR-138506 | piR-101175 | piR-111399 |
| piR-109137 | piR-122610 | piR-12185  |
| piR-106955 | piR-119919 | piR-114999 |
| piR-29811  | piR-103202 | piR-129504 |
| piR-112480 | piR-102577 | piR-107190 |
| piR-29540  | piR-141558 | piR-13337  |
| piR-133603 | piR-120463 | piR-142288 |
| piR-116498 | piR-15366  | piR-130101 |
| piR-1264   | piR-126893 | piR-124096 |
| piR-100476 | piR-105747 | piR-3558   |
| piR-115400 | piR-671    | piR-18734  |
| piR-126590 | piR-103336 | piR-14820  |
| piR-110003 | piR-23878  | piR-17888  |
| piR-29816  | piR-121891 | piR-120140 |
| piR-100504 | piR-123181 | piR-116984 |
| piR-23701  | piR-103690 | piR-124734 |
| piR-108521 | piR-103824 | piR-123475 |
| piR-129900 | piR-137613 | piR-135420 |
| piR-114269 | piR-108386 | piR-109586 |
| piR-7933   | piR-112787 | piR-123249 |
| piR-100973 | piR-126291 | piR-140821 |
| piR-136983 | piR-2489   | piR-7478   |
| piR-122275 | piR-139022 | piR-122315 |
| piR-136747 | piR-106535 | piR-131866 |
| piR-8514   | piR-134305 | piR-114541 |
| piR-117008 | piR-109176 | piR-7903   |
| piR-116758 | piR-2204   | piR-113704 |
| piR-104791 | piR-19309  | piR-24275  |
| piR-9182   | piR-114247 | piR-137431 |
| piR-106508 | piR-105660 | piR-4188   |
| piR-129619 | piR-136384 | piR-111981 |
| piR-107561 | piR-121525 | piR-8212   |
| piR-114193 | piR-132655 | piR-134010 |
| piR-100008 | piR-121007 | piR-4010   |
| piR-134507 | piR-110215 | piR-141096 |
| piR-112625 | piR-104244 | piR-108273 |
| piR-116877 | piR-112551 | piR-120463 |
| piR-113454 | piR-141027 | piR-12438  |
| piR-138387 | piR-100683 | piR-19851  |
| piR-117868 | piR-122619 | piR-102779 |

|            |            |            |
|------------|------------|------------|
| piR-3920   | piR-107745 | piR-9412   |
| piR-28644  | piR-120575 | piR-133448 |
| piR-380    | piR-123376 | piR-139413 |
| piR-100388 | piR-15469  | piR-7655   |
| piR-9787   | piR-104868 | piR-135401 |
| piR-4782   | piR-24676  | piR-677    |
| piR-130664 | piR-102490 | piR-29923  |
| piR-5073   | piR-107275 | piR-114150 |
| piR-17035  | piR-123266 | piR-6828   |
| piR-117595 | piR-101949 | piR-112224 |
| piR-14540  | piR-128903 | piR-112359 |
| piR-100836 | piR-119004 | piR-11574  |
| piR-116326 | piR-139084 | piR-111581 |
| piR-13275  | piR-142015 | piR-4482   |
| piR-142347 | piR-111950 | piR-103933 |
| piR-105016 | piR-136780 | piR-3592   |
| piR-103896 | piR-119123 | piR-117508 |
| piR-8513   | piR-13664  | piR-106402 |
| piR-100156 | piR-4835   | piR-136248 |
| piR-123222 | piR-112473 | piR-114667 |
| piR-125971 | piR-120236 | piR-130632 |
| piR-113023 | piR-110316 | piR-119235 |
| piR-125937 | piR-100504 | piR-8339   |
| piR-109906 | piR-136879 | piR-25028  |
| piR-115988 | piR-115372 | piR-28771  |
| piR-130055 | piR-103356 | piR-9411   |
| piR-109864 | piR-120468 | piR-23470  |
| piR-8356   | piR-105870 | piR-21294  |
| piR-108154 | piR-14124  | piR-8145   |
| piR-104040 | piR-127458 | piR-119107 |
| piR-103908 | piR-122972 | piR-115966 |
| piR-106222 | piR-16944  | piR-109495 |
| piR-120495 | piR-103986 | piR-114783 |
| piR-142241 | piR-105497 | piR-122182 |
| piR-127170 | piR-19991  | piR-4395   |
| piR-6343   | piR-123688 | piR-24895  |
| piR-121310 | piR-120440 | piR-115869 |
| piR-111495 | piR-120271 | piR-4519   |
| piR-28898  | piR-140471 | piR-101986 |
| piR-101093 | piR-100245 | piR-19375  |
| piR-134451 | piR-131088 | piR-121556 |
| piR-104526 | piR-131844 | piR-107052 |
| piR-101271 | piR-129159 | piR-137079 |
| piR-106248 | piR-114603 | piR-134679 |
| piR-113541 | piR-2095   | piR-11722  |
| piR-125440 | piR-136983 | piR-125958 |
| piR-128941 | piR-100303 | piR-120971 |
| piR-29382  | piR-111495 | piR-21065  |
| piR-10792  | piR-101904 | piR-4953   |
| piR-136967 | piR-101622 | piR-131787 |
| piR-111306 | piR-135715 | piR-118137 |
| piR-115692 | piR-119440 | piR-17374  |
| piR-112864 | piR-137442 | piR-126314 |
| piR-9115   | piR-104884 | piR-8752   |

piR-100492 piR-111032 piR-111905  
piR-110935 piR-109515 piR-15406  
piR-100327 piR-112864 piR-28459  
piR-119836 piR-126612 piR-127662  
piR-124207 piR-104826 piR-20709  
piR-130293 piR-9946 piR-108575  
piR-110092 piR-109409 piR-101459  
piR-115731 piR-130378 piR-137461  
piR-132405 piR-132328 piR-24871  
piR-114710 piR-138956 piR-111030  
piR-134432 piR-116756 piR-113843  
piR-422 piR-111254 piR-112316  
piR-107792 piR-107696 piR-116810  
piR-100192 piR-28683 piR-129079  
piR-123626 piR-130888 piR-11400  
piR-132229 piR-111595 piR-114449  
piR-135283 piR-106903 piR-376  
piR-108205 piR-123798 piR-125510  
piR-112424 piR-102874 piR-20694  
piR-6263 piR-112573 piR-129223  
piR-134974 piR-1369 piR-113693  
piR-133214 piR-109078 piR-131980  
piR-9053 piR-109016 piR-15293  
piR-125493 piR-136917 piR-114034  
piR-126298 piR-106922 piR-17604  
piR-13007 piR-141853 piR-23237  
piR-128558 piR-130236 piR-10470  
piR-138741 piR-3857 piR-101197  
piR-126096 piR-134831 piR-125567  
piR-139138 piR-125413 piR-138526  
piR-100026 piR-116390 piR-105721  
piR-114840 piR-104078 piR-104167  
piR-101141 piR-25090 piR-125575  
piR-131488 piR-114005 piR-1093  
piR-142563 piR-108389 piR-111754  
piR-126032 piR-121597 piR-138949  
piR-122525 piR-118702 piR-17095  
piR-107587 piR-119332 piR-129860  
piR-28739 piR-135355 piR-29556  
piR-139044 piR-130664 piR-566  
piR-2342 piR-14218 piR-505  
piR-1 piR-108303 piR-115292  
piR-112573 piR-19174 piR-13330  
piR-140774 piR-135142 piR-9410  
piR-28157 piR-129145 piR-27798  
piR-108597 piR-101496 piR-28770  
piR-139634 piR-117816 piR-136868  
piR-122668 piR-8501 piR-131882  
piR-7409 piR-122570 piR-121953  
piR-9183 piR-123095 piR-138589  
piR-110275 piR-134912 piR-123609  
piR-109232 piR-139927 piR-131309  
piR-124241 piR-142579 piR-122167  
piR-21655 piR-135642 piR-108114

piR-123349 piR-107473 piR-111408  
piR-123422 piR-106120 piR-1610  
piR-15343 piR-17736 piR-120719  
piR-2865 piR-100041 piR-134984  
piR-114399 piR-103908 piR-109765  
piR-2108 piR-125793 piR-106052  
piR-102314 piR-107633 piR-104259  
piR-104947 piR-100979 piR-14926  
piR-108206 piR-104533 piR-25307  
piR-101134 piR-114211 piR-138420  
piR-100152 piR-124011 piR-109756  
piR-123122 piR-118618 piR-1330  
piR-122043 piR-21518 piR-7733  
piR-102490 piR-101984 piR-26330  
piR-138314 piR-109407 piR-139362  
piR-121527 piR-134780 piR-128454  
piR-76 piR-115857 piR-105887  
piR-116362 piR-3920 piR-139586  
piR-3235 piR-126977 piR-113266  
piR-126274 piR-129888 piR-127614  
piR-100315 piR-108651 piR-21085  
piR-109663 piR-111881 piR-112297  
piR-5653 piR-130276 piR-130972  
piR-137275 piR-28593 piR-117059  
piR-109739 piR-117204 piR-28769  
piR-107733 piR-105413 piR-28285  
piR-8934 piR-8984 piR-126749  
piR-102261 piR-17658 piR-134500  
piR-113089 piR-103095 piR-3732  
piR-122166 piR-121470 piR-130744  
piR-2690 piR-103072 piR-116246  
piR-120864 piR-116529 piR-115005  
piR-142445 piR-121528 piR-5175  
piR-113684 piR-115524 piR-19781  
piR-27762 piR-14512 piR-131386  
piR-133472 piR-116847 piR-3329  
piR-28009 piR-102198 piR-117751  
piR-109687 piR-140715 piR-125148  
piR-131660 piR-105443 piR-11633  
piR-142490 piR-126184 piR-20708  
piR-6092 piR-4034 piR-112319  
piR-104425 piR-135781 piR-11723  
piR-126572 piR-135263 piR-116202  
piR-141164 piR-141478 piR-127191  
piR-21519 piR-23702 piR-142600  
piR-100052 piR-125796 piR-25154  
piR-103589 piR-16586 piR-18121  
piR-109532 piR-142576 piR-122814  
piR-130136 piR-14182 piR-142447  
piR-139645 piR-140945 piR-142293  
piR-103637 piR-134730 piR-17185  
piR-4985 piR-4347 piR-10320  
piR-121386 piR-118931 piR-111278  
piR-136453 piR-117207 piR-24817

piR-101326 piR-121241 piR-117252  
piR-101146 piR-5731 piR-14979  
piR-5216 piR-100375 piR-122255  
piR-121062 piR-130665 piR-106832  
piR-133538 piR-119124 piR-1051  
piR-108462 piR-103088 piR-6792  
piR-121607 piR-128091 piR-136632  
piR-100798 piR-139894 piR-129359  
piR-142240 piR-121286 piR-119704  
piR-136235 piR-110086 piR-3935  
piR-7546 piR-106812 piR-140478  
piR-7932 piR-102689 piR-565  
piR-102728 piR-105315 piR-130255  
piR-115713 piR-114478 piR-113425  
piR-139487 piR-141497 piR-100850  
piR-108017 piR-113564 piR-3990  
piR-111464 piR-102432 piR-6830  
piR-114402 piR-27792 piR-115926  
piR-110373 piR-109996 piR-18470  
piR-110871 piR-115587 piR-113432  
piR-127918 piR-128024 piR-100766  
piR-118027 piR-17341 piR-1272  
piR-22464 piR-135505 piR-18  
piR-2440 piR-142342 piR-141587  
piR-28050 piR-25272 piR-134595  
piR-101924 piR-119513 piR-26424  
piR-9791 piR-140966 piR-133261  
piR-109742 piR-110921 piR-129524  
piR-136422 piR-123793 piR-118519  
piR-114653 piR-111127 piR-119838  
piR-138402 piR-100277 piR-101290  
piR-132974 piR-108035 piR-9962  
piR-123132 piR-104590 piR-25709  
piR-7825 piR-100181 piR-108457  
piR-23721 piR-126443 piR-116816  
piR-105817 piR-122536 piR-3921  
piR-29057 piR-24458 piR-29441  
piR-139110 piR-110900 piR-107906  
piR-130131 piR-108834 piR-132009  
piR-14516 piR-117093 piR-118031  
piR-117445 piR-118236 piR-138190  
piR-110306 piR-7916 piR-105597  
piR-133806 piR-100246 piR-121652  
piR-129169 piR-103111 piR-2808  
piR-136774 piR-130312 piR-138638  
piR-126500 piR-134231 piR-1226  
piR-138324 piR-110720 piR-14972  
piR-102646 piR-106683 piR-119750  
piR-107610 piR-116449 piR-108134  
piR-117820 piR-117320 piR-133707  
piR-101955 piR-5807 piR-22649  
piR-101803 piR-111093 piR-8713  
piR-117476 piR-105184 piR-9409  
piR-29143 piR-100234 piR-14716

piR-132244 piR-125517 piR-142517  
piR-29576 piR-119271 piR-4898  
piR-4861 piR-16 piR-27866  
piR-10039 piR-141202 piR-21018  
piR-8845 piR-123499 piR-142582  
piR-101697 piR-7204 piR-105812  
piR-16973 piR-128741 piR-139687  
piR-8151 piR-133117 piR-107765  
piR-135910 piR-100580 piR-130757  
piR-131799 piR-130319 piR-8751  
piR-111014 piR-106864 piR-12333  
piR-107288 piR-137228 piR-112959  
piR-20306 piR-101101 piR-117118  
piR-119499 piR-142360 piR-20047  
piR-106373 piR-108463 piR-105046  
piR-108754 piR-125916 piR-126270  
piR-114046 piR-135164 piR-10319  
piR-121024 piR-119222 piR-1033  
piR-135359 piR-107740 piR-137131  
piR-130869 piR-118700 piR-18765  
piR-3009 piR-130806 piR-4520  
piR-100649 piR-133559 piR-28693  
piR-141233 piR-109534 piR-11711  
piR-113275 piR-19264 piR-9110  
piR-100361 piR-101050 piR-114902  
piR-127578 piR-128692 piR-114116  
piR-2083 piR-23700 piR-7468  
piR-132973 piR-119583 piR-111392  
piR-124733 piR-119499 piR-116316  
piR-122887 piR-100800 piR-20446  
piR-102810 piR-117889 piR-18936  
piR-139032 piR-133668 piR-132627  
piR-131754 piR-131927 piR-8242  
piR-121447 piR-28766 piR-4073  
piR-3241 piR-20073 piR-111560  
piR-105487 piR-103617 piR-11620  
piR-103869 piR-134009 piR-111694  
piR-3919 piR-139007 piR-4521  
piR-137672 piR-109576 piR-137556  
piR-110504 piR-15440 piR-122359  
piR-108721 piR-122172 piR-102183  
piR-132367 piR-108357 piR-141578  
piR-132337 piR-108053 piR-1307  
piR-123470 piR-19441 piR-132894  
piR-116783 piR-5858 piR-107376  
piR-8577 piR-106626 piR-20291  
piR-29740 piR-135322 piR-13432  
piR-121970 piR-125896 piR-129621  
piR-28010 piR-121668 piR-104004  
piR-9946 piR-130339 piR-100275  
piR-124560 piR-105103 piR-22205  
piR-138349 piR-106847 piR-22146  
piR-132586 piR-121526 piR-134473  
piR-121711 piR-115211 piR-25533

piR-137314 piR-109916 piR-17029  
piR-7086 piR-135365 piR-138227  
piR-115556 piR-6820 piR-113963  
piR-131756 piR-115096 piR-24351  
piR-9222 piR-2083 piR-23359  
piR-2465 piR-13140 piR-22894  
piR-129238 piR-137267 piR-21217  
piR-122496 piR-120284 piR-118401  
piR-7203 piR-121623 piR-118781  
piR-28092 piR-102989 piR-134711  
piR-107270 piR-18584 piR-134418  
piR-10283 piR-133728 piR-116868  
piR-118702 piR-8696 piR-11820  
piR-131749 piR-140146 piR-15199  
piR-28695 piR-112513 piR-101594  
piR-5584 piR-18760 piR-4524  
piR-4244 piR-105599 piR-17598  
piR-102426 piR-128478 piR-135893  
piR-112043 piR-107394 piR-125121  
piR-13415 piR-23826 piR-132292  
piR-29119 piR-141656 piR-130974  
piR-20196 piR-124461 piR-129496  
piR-116719 piR-13222 piR-7311  
piR-130124 piR-5411 piR-127746  
piR-102565 piR-133903 piR-137826  
piR-116692 piR-128899 piR-135191  
piR-115456 piR-3515 piR-123597  
piR-104196 piR-114729 piR-117878  
piR-26305 piR-127739 piR-141983  
piR-139022 piR-29740 piR-120983  
piR-139183 piR-139044 piR-12012  
piR-123640 piR-134639 piR-22594  
piR-823 piR-106821 piR-21264  
piR-1377 piR-103273 piR-105330  
piR-106079 piR-136272 piR-117534  
piR-101496 piR-101922 piR-10845  
piR-137000 piR-139592 piR-11710  
piR-132641 piR-108925 piR-28923  
piR-126014 piR-121463 piR-21326  
piR-107992 piR-13904 piR-141423  
piR-101487 piR-126014 piR-114539  
piR-29769 piR-105042 piR-119895  
piR-107175 piR-108703 piR-27886  
piR-2502 piR-140534 piR-101013  
piR-102072 piR-125462 piR-3561  
piR-27273 piR-137135 piR-2186  
piR-118029 piR-24459 piR-117650  
piR-30001 piR-102337 piR-138454  
piR-108932 piR-126564 piR-105345  
piR-135480 piR-131865 piR-3362  
piR-101317 piR-129632 piR-523  
piR-122676 piR-1444 piR-139265  
piR-102627 piR-12238 piR-130313  
piR-126210 piR-3919 piR-121692

piR-142015 piR-141766 piR-111783  
piR-122600 piR-117719 piR-1057  
piR-105594 piR-123321 piR-104876  
piR-119493 piR-104979 piR-532  
piR-23927 piR-142518 piR-129689  
piR-119919 piR-140666 piR-18764  
piR-115201 piR-133572 piR-137731  
piR-100967 piR-130025 piR-130225  
piR-108614 piR-123634 piR-29141  
piR-3258 piR-100997 piR-121628  
piR-116456 piR-124594 piR-25303  
piR-131591 piR-110046 piR-22206  
piR-111020 piR-15887 piR-123225  
piR-119619 piR-124686 piR-9441  
piR-121482 piR-28155 piR-101929  
piR-103953 piR-134408 piR-132767  
piR-114060 piR-127167 piR-3401  
piR-105934 piR-125937 piR-124687  
piR-137820 piR-101326 piR-117448  
piR-29118 piR-15441 piR-106476  
piR-105129 piR-113656 piR-16044  
piR-102915 piR-6102 piR-121302  
piR-140419 piR-106454 piR-24903  
piR-136082 piR-120576 piR-20183  
piR-104813 piR-103147 piR-134816  
piR-105630 piR-19992 piR-29985  
piR-4959 piR-103220 piR-123760  
piR-28918 piR-123916 piR-122481  
piR-2489 piR-15183 piR-106309  
piR-127827 piR-127139 piR-17094  
piR-117920 piR-122831 piR-142025  
piR-28158 piR-136440 piR-137615  
piR-121511 piR-102498 piR-133098  
piR-4798 piR-119459 piR-126084  
piR-29559 piR-131924 piR-100871  
piR-119628 piR-137046 piR-115915  
piR-120431 piR-114251 piR-113711  
piR-121982 piR-133718 piR-103980  
piR-118666 piR-133284 piR-1614  
piR-129158 piR-128936 piR-13573  
piR-134145 piR-76 piR-141783  
piR-103470 piR-110829 piR-141515  
piR-20087 piR-127484 piR-138087  
piR-136597 piR-125162 piR-115366  
piR-137351 piR-128746 piR-112378  
piR-121900 piR-28596 piR-13500  
piR-134448 piR-133309 piR-133808  
piR-103007 piR-105598 piR-101659  
piR-4428 piR-111376 piR-851  
piR-114603 piR-138590 piR-1100  
piR-103300 piR-106984 piR-102087  
piR-12363 piR-103634 piR-9481  
piR-134306 piR-103221 piR-20174  
piR-7866 piR-5180 piR-138162



piR-5819 piR-24422 piR-111092  
piR-103044 piR-110995 piR-100309  
piR-7506 piR-3151 piR-142588  
piR-14221 piR-15881 piR-137286  
piR-120911 piR-123999 piR-129525  
piR-102813 piR-3340 piR-125366  
piR-124759 piR-2153 piR-1212  
piR-14526 piR-139341 piR-106921  
piR-140162 piR-131309 piR-119538  
piR-136411 piR-117426 piR-141963  
piR-129830 piR-139672 piR-6829  
piR-100882 piR-101358 piR-586  
piR-101348 piR-4151 piR-22919  
piR-129580 piR-15314 piR-119608  
piR-123022 piR-138282 piR-108549  
piR-131615 piR-129399 piR-22413  
piR-111663 piR-5798 piR-1510  
piR-107245 piR-123848 piR-132984  
piR-109065 piR-130131 piR-3629  
piR-126184 piR-116980 piR-125872  
piR-109690 piR-131412 piR-120962  
piR-105066 piR-104413 piR-113852  
piR-141937 piR-115745 piR-113441  
piR-103356 piR-13105 piR-110733  
piR-108202 piR-119837 piR-101425  
piR-133546 piR-126530 piR-109821  
piR-107773 piR-113460 piR-107492  
piR-29999 piR-108313 piR-104094  
piR-131070 piR-135709 piR-16865  
piR-139105 piR-140662 piR-139177  
piR-28329 piR-103427 piR-128878  
piR-124868 piR-104040 piR-117013  
piR-23705 piR-115299 piR-16542  
piR-142544 piR-140388 piR-15985  
piR-28876 piR-6890 piR-138718  
piR-5858 piR-20451 piR-132419  
piR-20123 piR-115514 piR-126513  
piR-8846 piR-130946 piR-121779  
piR-127535 piR-138116 piR-9541  
piR-125843 piR-1331 piR-23015  
piR-100749 piR-129018 piR-131791  
piR-100519 piR-108217 piR-20430  
piR-117721 piR-25282 piR-128365  
piR-19989 piR-139384 piR-17184  
piR-111368 piR-129111 piR-121485  
piR-15314 piR-141697 piR-111864  
piR-141448 piR-115762 piR-10545  
piR-119410 piR-117276 piR-8160  
piR-28917 piR-104094 piR-134537  
piR-101788 piR-142566 piR-119925  
piR-103177 piR-126800 piR-109279  
piR-139258 piR-127828 piR-127731  
piR-104903 piR-140039 piR-119179  
piR-132077 piR-114110 piR-13549

piR-29813 piR-108817 piR-128281  
piR-106500 piR-139864 piR-8658  
piR-103660 piR-16767 piR-21105  
piR-123887 piR-114959 piR-141393  
piR-134243 piR-119857 piR-13755  
piR-124982 piR-108197 piR-105145  
piR-106180 piR-107805 piR-29224  
piR-109071 piR-104296 piR-119101  
piR-108378 piR-13425 piR-11732  
piR-101027 piR-102784 piR-20279  
piR-124566 piR-105129 piR-16261  
piR-17036 piR-15719 piR-131245  
piR-104847 piR-114477 piR-126861  
piR-123787 piR-121267 piR-10544  
piR-115641 piR-141473 piR-119175  
piR-118062 piR-13079 piR-17062  
piR-133147 piR-140582 piR-135872  
piR-111665 piR-118690 piR-132999  
piR-113084 piR-106214 piR-20410  
piR-130584 piR-139277 piR-121545  
piR-106557 piR-142646 piR-104345  
piR-126837 piR-134237 piR-20429  
piR-131071 piR-101499 piR-139133  
piR-24684 piR-112911 piR-133950  
piR-6566 piR-3521 piR-128395  
piR-120073 piR-24460 piR-44  
piR-101103 piR-110846 piR-114379  
piR-114864 piR-141292 piR-114149  
piR-117078 piR-116551 piR-100142  
piR-3826 piR-899 piR-27596  
piR-113858 piR-125069 piR-21990  
piR-1322 piR-7703 piR-128579  
piR-133182 piR-114134 piR-102412  
piR-108712 piR-7884 piR-100325  
piR-13697 piR-134419 piR-19233  
piR-101957 piR-111591 piR-1263  
piR-108921 piR-590 piR-12603  
piR-127144 piR-134579 piR-111332  
piR-28049 piR-122127 piR-22148  
piR-120574 piR-17697 piR-20173  
piR-13982 piR-141906 piR-5001  
piR-13817 piR-141691 piR-17603  
piR-10129 piR-115182 piR-119528  
piR-137876 piR-8319 piR-111939  
piR-8976 piR-141987 piR-108315  
piR-122440 piR-105549 piR-13992  
piR-103102 piR-122440 piR-103350  
piR-137690 piR-120276 piR-8774  
piR-139991 piR-103633 piR-20753  
piR-121781 piR-2725 piR-18557  
piR-103198 piR-14844 piR-120819  
piR-138600 piR-138409 piR-104807  
piR-137836 piR-127580 piR-9408  
piR-100407 piR-120138 piR-137104

piR-124233 piR-108042 piR-116784  
piR-110482 piR-117003 piR-7018  
piR-112840 piR-139962 piR-15205  
piR-109140 piR-135039 piR-13354  
piR-15628 piR-134761 piR-127413  
piR-101110 piR-100751 piR-11653  
piR-142332 piR-124227 piR-1125  
piR-119357 piR-116575 piR-4013  
piR-28683 piR-112694 piR-18139  
piR-105025 piR-104468 piR-17109  
piR-126509 piR-115156 piR-104508  
piR-128967 piR-140346 piR-134064  
piR-136539 piR-128286 piR-3015  
piR-139876 piR-130990 piR-130802  
piR-118439 piR-117172 piR-117846  
piR-108463 piR-116960 piR-100556  
piR-108166 piR-126943 piR-16234  
piR-404 piR-126885 piR-11730  
piR-20779 piR-126083 piR-105057  
piR-4086 piR-117666 piR-3805  
piR-2358 piR-134254 piR-142027  
piR-141646 piR-120608 piR-120672  
piR-119857 piR-109220 piR-8397  
piR-108752 piR-114419 piR-19420  
piR-136653 piR-107959 piR-141647  
piR-2327 piR-111257 piR-131487  
piR-2785 piR-141233 piR-121604  
piR-133789 piR-130533 piR-107089  
piR-114988 piR-116521 piR-502  
piR-105228 piR-131201 piR-27217  
piR-14209 piR-118464 piR-16262  
piR-131844 piR-106498 piR-140255  
piR-120880 piR-100050 piR-122764  
piR-6154 piR-121380 piR-10889  
piR-125163 piR-422 piR-108210  
piR-114477 piR-132145 piR-28253  
piR-101336 piR-105699 piR-1963  
piR-106483 piR-109641 piR-127469  
piR-1824 piR-2202 piR-11727  
piR-133847 piR-138950 piR-109802  
piR-137565 piR-133245 piR-108288  
piR-102315 piR-104155 piR-7574  
piR-8310 piR-120095 piR-6684  
piR-102744 piR-106088 piR-495  
piR-140112 piR-120564 piR-20294  
piR-8704 piR-121088 piR-111103  
piR-6405 piR-114881 piR-141275  
piR-140763 piR-130653 piR-107997  
piR-18378 piR-112934 piR-107430  
piR-6022 piR-133874 piR-106604  
piR-107541 piR-127200 piR-9124  
piR-27677 piR-123833 piR-29619  
piR-127232 piR-101799 piR-129059  
piR-13222 piR-7447 piR-125394

piR-118769 piR-127681 piR-11708  
piR-132114 piR-15036 piR-116731  
piR-132008 piR-110597 piR-24061  
piR-103323 piR-104080 piR-122353  
piR-106108 piR-102333 piR-101001  
piR-12482 piR-101158 piR-129889  
piR-140781 piR-137915 piR-129814  
piR-114971 piR-127009 piR-122924  
piR-140750 piR-113780 piR-114337  
piR-101660 piR-111590 piR-107520  
piR-102126 piR-119157 piR-9835  
piR-100662 piR-117700 piR-119759  
piR-27720 piR-128219 piR-110405  
piR-2412 piR-112396 piR-29861  
piR-141343 piR-142553 piR-29631  
piR-140073 piR-141820 piR-29491  
piR-5110 piR-134984 piR-19461  
piR-103179 piR-121162 piR-135178  
piR-125921 piR-136687 piR-114556  
piR-117881 piR-100070 piR-109143  
piR-110732 piR-141775 piR-9659  
piR-18048 piR-139010 piR-9482  
piR-123411 piR-13221 piR-127828  
piR-120463 piR-137609 piR-126761  
piR-100797 piR-114497 piR-100010  
piR-105854 piR-124453 piR-24968  
piR-100111 piR-16984 piR-132226  
piR-122654 piR-112147 piR-128698  
piR-101686 piR-21482 piR-123492  
piR-119391 piR-131313 piR-104744  
piR-133443 piR-114688 piR-26744  
piR-131495 piR-142564 piR-22000  
piR-125865 piR-119980 piR-21869  
piR-118733 piR-21324 piR-14738  
piR-4808 piR-115066 piR-134390  
piR-101454 piR-17725 piR-121195  
piR-141872 piR-124363 piR-103944  
piR-119969 piR-116887 piR-101595  
piR-132988 piR-106627 piR-10096  
piR-116993 piR-139025 piR-128734  
piR-125980 piR-29960 piR-116126  
piR-107834 piR-135469 piR-113172  
piR-106113 piR-139411 piR-110159  
piR-110212 piR-132577 piR-20296  
piR-128936 piR-125188 piR-132470  
piR-10753 piR-136535 piR-12902  
piR-131261 piR-127912 piR-121337  
piR-123248 piR-128662 piR-120408  
piR-104832 piR-119997 piR-118095  
piR-4159 piR-105913 piR-25480  
piR-123848 piR-136887 piR-25167  
piR-126263 piR-128193 piR-24667  
piR-103898 piR-126008 piR-21100  
piR-4686 piR-106097 piR-17096

piR-136587 piR-125053 piR-10840  
piR-115259 piR-139974 piR-102400  
piR-140883 piR-101459 piR-23316  
piR-132203 piR-114724 piR-11281  
piR-126996 piR-6345 piR-3560  
piR-126780 piR-116831 piR-125201  
piR-12336 piR-138253 piR-141033  
piR-105457 piR-107619 piR-140796  
piR-100255 piR-114230 piR-110646  
piR-118753 piR-118209 piR-6501  
piR-116756 piR-102947 piR-6308  
piR-128583 piR-142161 piR-22596  
piR-137272 piR-129021 piR-131232  
piR-107804 piR-130721 piR-120846  
piR-114081 piR-15325 piR-120751  
piR-117613 piR-129371 piR-116493  
piR-109996 piR-119029 piR-103369  
piR-129009 piR-118838 piR-9836  
piR-112728 piR-104185 piR-138159  
piR-125210 piR-122525 piR-111900  
piR-101470 piR-133665 piR-610  
piR-137939 piR-138515 piR-15306  
piR-129229 piR-139032 piR-128164  
piR-7886 piR-19582 piR-11713  
piR-17637 piR-128945 piR-108899  
piR-123034 piR-124261 piR-6982  
piR-122479 piR-21449 piR-6072  
piR-11187 piR-107669 piR-25606  
piR-122172 piR-117647 piR-2185  
piR-10858 piR-109071 piR-133814  
piR-140218 piR-100315 piR-118851  
piR-27675 piR-16865 piR-18092  
piR-133728 piR-133407 piR-17208  
piR-105902 piR-124080 piR-16502  
piR-110555 piR-118274 piR-131885  
piR-126303 piR-116738 piR-117012  
piR-136827 piR-110943 piR-116293  
piR-7517 piR-8347 piR-3209  
piR-108970 piR-111639 piR-24936  
piR-10345 piR-8114 piR-142560  
piR-121908 piR-137351 piR-139247  
piR-130616 piR-27720 piR-109512  
piR-139171 piR-142563 piR-25573  
piR-104382 piR-121850 piR-142368  
piR-131017 piR-121551 piR-133341  
piR-140587 piR-20059 piR-127193  
piR-138063 piR-126293 piR-124270  
piR-106181 piR-123397 piR-114118  
piR-11903 piR-107214 piR-114022  
piR-110627 piR-112334 piR-105766  
piR-119686 piR-16726 piR-21121  
piR-115651 piR-106011 piR-136377  
piR-107619 piR-137992 piR-127691  
piR-137108 piR-120190 piR-127260

piR-135661 piR-111017 piR-126622  
piR-138982 piR-141166 piR-121933  
piR-29149 piR-121738 piR-121763  
piR-6819 piR-107605 piR-112559  
piR-132511 piR-102677 piR-28314  
piR-100386 piR-128426 piR-21705  
piR-132542 piR-16170 piR-21418  
piR-15011 piR-127197 piR-19457  
piR-108313 piR-13759 piR-137707  
piR-141713 piR-126572 piR-130781  
piR-105606 piR-102716 piR-128751  
piR-106637 piR-127926 piR-125647  
piR-124035 piR-125798 piR-115667  
piR-128998 piR-134535 piR-110857  
piR-4958 piR-15035 piR-11064  
piR-130377 piR-132195 piR-109274  
piR-107372 piR-17478 piR-108023  
piR-120793 piR-140617 piR-102177  
piR-15627 piR-136685 piR-100447  
piR-5905 piR-25286 piR-29140  
piR-109176 piR-112488 piR-28877  
piR-5936 piR-107999 piR-28604  
piR-134521 piR-20518 piR-18367  
piR-2928 piR-133660 piR-16042  
piR-107606 piR-15350 piR-141924  
piR-116346 piR-134929 piR-139513  
piR-9966 piR-103152 piR-128988  
piR-137044 piR-141109 piR-125473  
piR-137219 piR-136593 piR-111691  
piR-100926 piR-122139 piR-110490  
piR-139078 piR-107586 piR-140061  
piR-109915 piR-8117 piR-133774  
piR-115914 piR-116969 piR-111211  
piR-107650 piR-2916 piR-6071  
piR-122456 piR-18182 piR-26294  
piR-127215 piR-140140 piR-21134  
piR-18080 piR-122074 piR-131399  
piR-14329 piR-104029 piR-129775  
piR-101989 piR-109648 piR-122410  
piR-130545 piR-141400 piR-10908  
piR-20305 piR-109663 piR-102520  
piR-114665 piR-108206 piR-21789  
piR-29551 piR-20370 piR-137038  
piR-128530 piR-103007 piR-12724  
piR-100042 piR-139570 piR-125052  
piR-124724 piR-124613 piR-107101  
piR-8114 piR-118344 piR-46  
piR-101820 piR-106180 piR-142382  
piR-22028 piR-122479 piR-141426  
piR-107044 piR-105334 piR-113204  
piR-850 piR-102214 piR-108893  
piR-21045 piR-114117 piR-108174  
piR-137998 piR-135264 piR-246  
piR-7164 piR-117881 piR-19595

piR-137710 piR-6976 piR-15200  
piR-112989 piR-140095 piR-137188  
piR-134180 piR-124903 piR-134224  
piR-132722 piR-117129 piR-127454  
piR-103273 piR-330 piR-111669  
piR-101153 piR-141849 piR-1076  
piR-130523 piR-125865 piR-15266  
piR-127795 piR-104782 piR-136783  
piR-28806 piR-29930 piR-135529  
piR-100145 piR-129882 piR-134982  
piR-124052 piR-114812 piR-119233  
piR-15337 piR-110098 piR-11779  
piR-105881 piR-15123 piR-110189  
piR-125842 piR-16420 piR-108689  
piR-142721 piR-138648 piR-101050  
piR-127353 piR-119930 piR-27888  
piR-1283 piR-119384 piR-27887  
piR-125726 piR-104366 piR-18043  
piR-119734 piR-121605 piR-135914  
piR-25321 piR-19112 piR-134437  
piR-119314 piR-142689 piR-132380  
piR-140388 piR-101683 piR-120841  
piR-7899 piR-136911 piR-115442  
piR-100313 piR-120507 piR-108090  
piR-131623 piR-140864 piR-9054  
piR-109093 piR-100104 piR-6848  
piR-5907 piR-2343 piR-22886  
piR-113656 piR-114009 piR-20834  
piR-28684 piR-102095 piR-142645  
piR-141045 piR-118717 piR-142613  
piR-101068 piR-2653 piR-136244  
piR-4063 piR-122138 piR-133904  
piR-110745 piR-111532 piR-130935  
piR-122074 piR-110028 piR-129824  
piR-112085 piR-18938 piR-12386  
piR-2050 piR-125674 piR-122616  
piR-125608 piR-123576 piR-113471  
piR-109885 piR-101156 piR-107936  
piR-9528 piR-100629 piR-1831  
piR-8969 piR-25144 piR-1739  
piR-2397 piR-121877 piR-141090  
piR-103900 piR-20838 piR-140226  
piR-5585 piR-127687 piR-138563  
piR-101860 piR-114163 piR-122861  
piR-110469 piR-105428 piR-119887  
piR-136832 piR-107341 piR-116258  
piR-124124 piR-107792 piR-109443  
piR-120009 piR-108124 piR-107397  
piR-108674 piR-102492 piR-107058  
piR-112851 piR-9116 piR-4074  
piR-103483 piR-120454 piR-139811  
piR-134525 piR-128681 piR-130582  
piR-101091 piR-106576 piR-127182  
piR-105684 piR-106543 piR-123129

piR-111068 piR-101271 piR-120673  
piR-103318 piR-106557 piR-9616  
piR-124341 piR-29800 piR-134161  
piR-134322 piR-27799 piR-12601  
piR-107097 piR-15854 piR-122054  
piR-139530 piR-122907 piR-121180  
piR-108138 piR-25339 piR-108525  
piR-4039 piR-23946 piR-107370  
piR-111727 piR-115461 piR-18247  
piR-25215 piR-110087 piR-14084  
piR-27742 piR-129314 piR-117313  
piR-115499 piR-133234 piR-9496  
piR-100672 piR-142412 piR-4638  
piR-138503 piR-138098 piR-27368  
piR-142230 piR-134569 piR-25975  
piR-103060 piR-121778 piR-24769  
piR-132018 piR-116890 piR-2397  
piR-109033 piR-116485 piR-22683  
piR-132317 piR-139953 piR-21985  
piR-113386 piR-130539 piR-136834  
piR-1369 piR-128944 piR-131422  
piR-105202 piR-851 piR-124671  
piR-5652 piR-106181 piR-124200  
piR-140787 piR-102232 piR-122622  
piR-129464 piR-16719 piR-118767  
piR-126661 piR-18623 piR-111055  
piR-5533 piR-1587 piR-105456  
piR-23722 piR-15333 piR-10171  
piR-110117 piR-12315 piR-138890  
piR-107594 piR-116111 piR-135733  
piR-19132 piR-17987 piR-128139  
piR-100241 piR-133503 piR-127272  
piR-142359 piR-107137 piR-124438  
piR-22033 piR-1528 piR-115371  
piR-122638 piR-130846 piR-115321  
piR-114758 piR-124784 piR-110761  
piR-23856 piR-128952 piR-101586  
piR-5985 piR-108196 piR-6048  
piR-8792 piR-14921 piR-29468  
piR-1325 piR-134744 piR-2382  
piR-4053 piR-105097 piR-141383  
piR-114096 piR-24693 piR-139637  
piR-128024 piR-106955 piR-141157  
piR-116243 piR-103127 piR-137718  
piR-29696 piR-680 piR-13684  
piR-10745 piR-139571 piR-128119  
piR-102689 piR-117855 piR-127813  
piR-129975 piR-132736 piR-127793  
piR-140664 piR-141123 piR-124275  
piR-5378 piR-112625 piR-1218  
piR-117238 piR-129898 piR-11709  
piR-102879 piR-124167 piR-10135  
piR-103023 piR-142708 piR-100058  
piR-137312 piR-142721 piR-7818



piR-100279 piR-106397 piR-24588  
piR-12857 piR-100760 piR-24173  
piR-108216 piR-124056 piR-142541  
piR-104633 piR-2805 piR-123100  
piR-129334 piR-131676 piR-122957  
piR-124709 piR-106277 piR-122824  
piR-9798 piR-102533 piR-122101  
piR-111217 piR-118481 piR-6653  
piR-104750 piR-3066 piR-14009  
piR-139938 piR-131281 piR-133117  
piR-131588 piR-109628 piR-131108  
piR-6057 piR-107277 piR-116037  
piR-119541 piR-131114 piR-110782  
piR-136094 piR-127665 piR-110584  
piR-113243 piR-124430 piR-4518  
piR-106325 piR-104865 piR-19429  
piR-14167 piR-101869 piR-14448  
piR-105923 piR-127021 piR-126338  
piR-112617 piR-116646 piR-124739  
piR-122424 piR-4402 piR-124054  
piR-119689 piR-121335 piR-11923  
piR-131718 piR-100832 piR-118768  
piR-103075 piR-138511 piR-110273  
piR-103020 piR-106384 piR-107428  
piR-122066 piR-115266 piR-10138  
piR-10457 piR-14594 piR-541  
piR-141629 piR-133115 piR-5374  
piR-28594 piR-126045 piR-4523  
piR-114441 piR-10943 piR-4441  
piR-102577 piR-133968 piR-29843  
piR-130319 piR-105183 piR-21707  
piR-133172 piR-103063 piR-19067  
piR-7481 piR-102627 piR-14292  
piR-110291 piR-30001 piR-139590  
piR-102337 piR-139616 piR-136075  
piR-14220 piR-12271 piR-134739  
piR-27554 piR-135606 piR-1274  
piR-28772 piR-1834 piR-12592  
piR-114688 piR-142436 piR-106931  
piR-135352 piR-106108 piR-105491  
piR-105006 piR-15856 piR-102446  
piR-4396 piR-117289 piR-7691  
piR-106395 piR-142432 piR-29251  
piR-128068 piR-113618 piR-245  
piR-116969 piR-101955 piR-22838  
piR-106299 piR-101777 piR-20695  
piR-11194 piR-102735 piR-20096  
piR-4323 piR-3677 piR-1469  
piR-120985 piR-109110 piR-14286  
piR-111179 piR-108406 piR-131316  
piR-117722 piR-101468 piR-128450  
piR-14376 piR-107618 piR-122349  
piR-17341 piR-142233 piR-11305  
piR-14539 piR-20631 piR-112733

piR-115903 piR-119769 piR-107443  
piR-2980 piR-118005 piR-107051  
piR-100070 piR-104156 piR-102501  
piR-3309 piR-113751 piR-100872  
piR-119793 piR-23786 piR-4843  
piR-123095 piR-133538 piR-19011  
piR-121497 piR-125938 piR-132637  
piR-128450 piR-118169 piR-129508  
piR-123892 piR-123572 piR-22719  
piR-102433 piR-111731 piR-20778  
piR-8228 piR-101527 piR-142299  
piR-7981 piR-133440 piR-121771  
piR-103926 piR-117468 piR-107426  
piR-10455 piR-100727 piR-9272  
piR-120375 piR-7025 piR-4731  
piR-120682 piR-140760 piR-17061  
piR-138421 piR-127829 piR-140744  
piR-122380 piR-17309 piR-139786  
piR-126068 piR-123053 piR-138952  
piR-119240 piR-117127 piR-132525  
piR-105365 piR-109065 piR-131769  
piR-111924 piR-104010 piR-126567  
piR-110031 piR-15215 piR-125691  
piR-121136 piR-126876 piR-125555  
piR-108362 piR-116268 piR-122627  
piR-6147 piR-115397 piR-121589  
piR-129481 piR-142660 piR-113940  
piR-100820 piR-128120 piR-11070  
piR-108863 piR-123265 piR-107935  
piR-15215 piR-115713 piR-107171  
piR-100216 piR-142440 piR-106427  
piR-142299 piR-125681 piR-140696  
piR-6310 piR-136318 piR-129740  
piR-107277 piR-118238 piR-129042  
piR-115096 piR-107002 piR-127627  
piR-116919 piR-138731 piR-126717  
piR-121894 piR-123512 piR-11910  
piR-8755 piR-103366 piR-113883  
piR-118992 piR-17853 piR-112397  
piR-110409 piR-129529 piR-111038  
piR-28278 piR-25212 piR-110454  
piR-104288 piR-140032 piR-102347  
piR-16643 piR-137727 piR-29628  
piR-123319 piR-126422 piR-26888  
piR-114134 piR-123233 piR-24921  
piR-7500 piR-100132 piR-14994  
piR-11623 piR-141553 piR-140757  
piR-105968 piR-120641 piR-139657  
piR-103361 piR-114295 piR-137215  
piR-4104 piR-132439 piR-135797  
piR-141202 piR-126533 piR-134072  
piR-117174 piR-120985 piR-133845  
piR-4154 piR-108081 piR-131884  
piR-29452 piR-102433 piR-126224

piR-125577 piR-22966 piR-120771  
piR-2251 piR-129483 piR-115087  
piR-6565 piR-123026 piR-104641  
piR-119769 piR-110967 piR-4639  
piR-137867 piR-103389 piR-24973  
piR-24133 piR-22650 piR-22725  
piR-112829 piR-136306 piR-17097  
piR-129312 piR-136026 piR-14825  
piR-142342 piR-129106 piR-13921  
piR-131151 piR-139402 piR-137571  
piR-130853 piR-130632 piR-133780  
piR-102677 piR-127550 piR-126696  
piR-29812 piR-12611 piR-121987  
piR-117770 piR-110155 piR-118931  
piR-128277 piR-109046 piR-117444  
piR-111088 piR-29831 piR-106400  
piR-136780 piR-135073 piR-103077  
piR-29914 piR-103044 piR-28510  
piR-101527 piR-114304 piR-28142  
piR-2162 piR-112100 piR-26681  
piR-23878 piR-102816 piR-18397  
piR-27422 piR-130514 piR-16295  
piR-105913 piR-106781 piR-141011  
piR-135657 piR-5412 piR-133141  
piR-109512 piR-25438 piR-132169  
piR-125216 piR-127811 piR-128868  
piR-14321 piR-117901 piR-128737  
piR-2107 piR-110409 piR-127431  
piR-126765 piR-106423 piR-126751  
piR-3280 piR-104560 piR-123916  
piR-126121 piR-5622 piR-118807  
piR-101445 piR-19012 piR-115284  
piR-126045 piR-28916 piR-114270  
piR-117075 piR-22033 piR-11419  
piR-24513 piR-139197 piR-112340  
piR-3168 piR-129294 piR-10909  
piR-101900 piR-130098 piR-26901  
piR-142555 piR-110389 piR-2415  
piR-129420 piR-106260 piR-19854  
piR-115701 piR-105832 piR-19850  
piR-103019 piR-3258 piR-142530  
piR-126445 piR-139194 piR-141425  
piR-15067 piR-127202 piR-134861  
piR-121428 piR-107911 piR-133877  
piR-129368 piR-380 piR-132800  
piR-122109 piR-109210 piR-130858  
piR-9123 piR-107812 piR-118842  
piR-102537 piR-105584 piR-117246  
piR-124559 piR-28973 piR-116491  
piR-102121 piR-2273 piR-114417  
piR-137046 piR-2304 piR-111565  
piR-8609 piR-120882 piR-101409  
piR-117214 piR-112247 piR-21214  
piR-13420 piR-7162 piR-142699

piR-134769 piR-136885 piR-142375  
piR-26108 piR-127276 piR-140835  
piR-107700 piR-100936 piR-12997  
piR-127678 piR-8845 piR-123737  
piR-23133 piR-13748 piR-12013  
piR-132054 piR-112545 piR-112421  
piR-393 piR-105066 piR-112184  
piR-131212 piR-100929 piR-103071  
piR-137499 piR-23927 piR-9944  
piR-127580 piR-121771 piR-6928  
piR-130631 piR-102761 piR-6320  
piR-4960 piR-140155 piR-4249  
piR-122009 piR-122218 piR-26710  
piR-17785 piR-110808 piR-25845  
piR-3082 piR-139280 piR-18770  
piR-120064 piR-117759 piR-139980  
piR-115810 piR-136607 piR-139101  
piR-131481 piR-120532 piR-136247  
piR-7426 piR-116027 piR-133965  
piR-23004 piR-104970 piR-128923  
piR-27658 piR-137560 piR-128330  
piR-12555 piR-132685 piR-120042  
piR-103164 piR-132332 piR-11929  
piR-111627 piR-140809 piR-108810  
piR-128098 piR-15084 piR-108666  
piR-113950 piR-127179 piR-107798  
piR-108967 piR-125434 piR-9834  
piR-23986 piR-110235 piR-7360  
piR-107817 piR-28985 piR-676  
piR-8215 piR-142217 piR-20265  
piR-115633 piR-126110 piR-15283  
piR-141588 piR-100918 piR-136159  
piR-13503 piR-127191 piR-135977  
piR-123205 piR-136210 piR-134043  
piR-108830 piR-105635 piR-133777  
piR-1406 piR-136422 piR-129455  
piR-9097 piR-7615 piR-121552  
piR-108418 piR-1921 piR-120351  
piR-101151 piR-142425 piR-119623  
piR-132332 piR-131402 piR-118660  
piR-127829 piR-129258 piR-11764  
piR-127041 piR-111807 piR-1171  
piR-131312 piR-134790 piR-11498  
piR-114469 piR-5199 piR-114214  
piR-139918 piR-132379 piR-108599  
piR-112449 piR-110731 piR-8038  
piR-102478 piR-105947 piR-21986  
piR-126024 piR-105902 piR-139380  
piR-115892 piR-29109 piR-137305  
piR-141464 piR-134797 piR-136267  
piR-108567 piR-104692 piR-130899  
piR-3293 piR-106754 piR-125882  
piR-11759 piR-13027 piR-119310  
piR-109636 piR-125839 piR-117706

piR-115693 piR-117008 piR-117260  
piR-117426 piR-104344 piR-116942  
piR-121597 piR-101806 piR-115990  
piR-103692 piR-141677 piR-113788  
piR-13059 piR-129505 piR-112930  
piR-140009 piR-128625 piR-1111  
piR-103652 piR-117760 piR-1110  
piR-110488 piR-117114 piR-105751  
piR-10225 piR-112378 piR-103740  
piR-134498 piR-2490 piR-3190  
piR-136901 piR-134740 piR-17849  
piR-131921 piR-142062 piR-128030  
piR-120577 piR-136943 piR-126072  
piR-4694 piR-133252 piR-124742  
piR-140841 piR-13750 piR-122568  
piR-110417 piR-105686 piR-122545  
piR-138943 piR-131014 piR-116801  
piR-111508 piR-13041 piR-7774  
piR-126681 piR-119112 piR-5767  
piR-126943 piR-113956 piR-3314  
piR-106978 piR-139220 piR-29894  
piR-105743 piR-13463 piR-2548  
piR-139192 piR-127563 piR-22576  
piR-141485 piR-117247 piR-18370  
piR-5240 piR-20392 piR-15572  
piR-130298 piR-110790 piR-140818  
piR-130872 piR-134734 piR-137903  
piR-17856 piR-108312 piR-137389  
piR-141229 piR-106468 piR-134558  
piR-128370 piR-136868 piR-130530  
piR-8042 piR-133238 piR-12930  
piR-3066 piR-4308 piR-122322  
piR-2687 piR-108191 piR-117317  
piR-142512 piR-8700 piR-117124  
piR-108145 piR-29398 piR-116956  
piR-120137 piR-136428 piR-115468  
piR-8347 piR-137218 piR-113157  
piR-118344 piR-135799 piR-112040  
piR-110569 piR-116437 piR-111894  
piR-107125 piR-24088 piR-110862  
piR-15479 piR-14102 piR-107074  
piR-106034 piR-111506 piR-5292  
piR-125825 piR-404 piR-5128  
piR-120048 piR-134129 piR-29765  
piR-3943 piR-126188 piR-23402  
piR-118236 piR-129653 piR-14131  
piR-14525 piR-113074 piR-13881  
piR-121193 piR-100560 piR-134320  
piR-131634 piR-23446 piR-129575  
piR-100182 piR-140874 piR-127676  
piR-118618 piR-121498 piR-123746  
piR-3171 piR-112699 piR-121143  
piR-116390 piR-22694 piR-120767  
piR-119078 piR-109004 piR-120746

piR-109409 piR-134019 piR-115670  
piR-134740 piR-127682 piR-11482  
piR-18379 piR-111452 piR-113255  
piR-128418 piR-28606 piR-107989  
piR-128390 piR-125686 piR-107858  
piR-104884 piR-139026 piR-107544  
piR-132519 piR-127714 piR-101145  
piR-3142 piR-112172 piR-4707  
piR-121324 piR-113376 piR-25339  
piR-21410 piR-134004 piR-21245  
piR-103367 piR-120824 piR-19033  
piR-114943 piR-112411 piR-181  
piR-129503 piR-111345 piR-142294  
piR-137917 piR-135441 piR-137419  
piR-8158 piR-106395 piR-134511  
piR-4947 piR-13271 piR-133151  
piR-126002 piR-113188 piR-127738  
piR-124523 piR-25832 piR-119771  
piR-119583 piR-135892 piR-118240  
piR-128692 piR-106091 piR-111223  
piR-2153 piR-105969 piR-108919  
piR-3907 piR-27793 piR-104414  
piR-14364 piR-11621 piR-103305  
piR-106526 piR-132080 piR-102563  
piR-127471 piR-119325 piR-100931  
piR-101550 piR-104971 piR-9796  
piR-133284 piR-15100 piR-9655  
piR-5777 piR-142202 piR-8878  
piR-134881 piR-138449 piR-4763  
piR-137320 piR-118451 piR-28248  
piR-10951 piR-386 piR-22973  
piR-134370 piR-115093 piR-21933  
piR-110536 piR-106018 piR-21195  
piR-121642 piR-4258 piR-20672  
piR-3065 piR-22031 piR-15884  
piR-130612 piR-16343 piR-1574  
piR-2737 piR-139050 piR-141225  
piR-136106 piR-132511 piR-138519  
piR-106722 piR-16768 piR-137299  
piR-127178 piR-101923 piR-133895  
piR-140346 piR-3339 piR-126883  
piR-105635 piR-134594 piR-125956  
piR-113112 piR-101980 piR-119645  
piR-100367 piR-132114 piR-119569  
piR-138648 piR-109322 piR-113123  
piR-117647 piR-123702 piR-110601  
piR-142226 piR-134417 piR-110201  
piR-128167 piR-122660 piR-109800  
piR-101268 piR-8397 piR-1097  
piR-14832 piR-126543 piR-109329  
piR-15366 piR-125103 piR-108466  
piR-124269 piR-109762 piR-108184  
piR-137735 piR-8815 piR-105202  
piR-4102 piR-7023 piR-6487

piR-125666 piR-138512 piR-4236  
piR-124112 piR-134611 piR-3019  
piR-101061 piR-119070 piR-22197  
piR-137402 piR-113322 piR-18230  
piR-133669 piR-104006 piR-17936  
piR-5794 piR-8378 piR-17228  
piR-132636 piR-15371 piR-15023  
piR-115683 piR-138442 piR-140322  
piR-100639 piR-115610 piR-137362  
piR-126720 piR-113243 piR-134851  
piR-108504 piR-108908 piR-130814  
piR-106254 piR-17650 piR-127154  
piR-136895 piR-139002 piR-12373  
piR-118480 piR-17695 piR-119428  
piR-111706 piR-109100 piR-112467  
piR-107805 piR-100386 piR-109182  
piR-131281 piR-121383 piR-105842  
piR-112680 piR-114555 piR-26826  
piR-117450 piR-109024 piR-25450  
piR-106556 piR-8761 piR-15980  
piR-121771 piR-15344 piR-139758  
piR-6811 piR-103299 piR-139718  
piR-13816 piR-131437 piR-13928  
piR-2171 piR-119917 piR-133995  
piR-110399 piR-29726 piR-124788  
piR-19988 piR-102778 piR-123563  
piR-111946 piR-137468 piR-119556  
piR-7760 piR-130296 piR-119275  
piR-126153 piR-126890 piR-110861  
piR-103146 piR-106594 piR-103268  
piR-128478 piR-21342 piR-9574  
piR-119010 piR-6739 piR-484  
piR-11557 piR-141660 piR-3559  
piR-117211 piR-136852 piR-29990  
piR-120131 piR-128889 piR-29115  
piR-111700 piR-126463 piR-26487  
piR-125290 piR-130461 piR-22208  
piR-133428 piR-126197 piR-21216  
piR-126083 piR-126121 piR-17354  
piR-139063 piR-124163 piR-1582  
piR-133512 piR-117739 piR-142037  
piR-102317 piR-100910 piR-139346  
piR-7474 piR-1330 piR-13797  
piR-27820 piR-7808 piR-128292  
piR-131253 piR-139089 piR-12813  
piR-123087 piR-132683 piR-12673  
piR-112497 piR-113451 piR-117497  
piR-102816 piR-111635 piR-112548  
piR-28675 piR-101865 piR-110701  
piR-27446 piR-136041 piR-101129  
piR-121453 piR-134724 piR-100197  
piR-9937 piR-126865 piR-7446  
piR-29555 piR-117671 piR-2414  
piR-2688 piR-100497 piR-23392

piR-131776 piR-23887 piR-23370  
piR-5689 piR-17127 piR-16103  
piR-128419 piR-134497 piR-139694  
piR-6034 piR-134258 piR-139472  
piR-124255 piR-123313 piR-136407  
piR-114401 piR-119213 piR-132562  
piR-116727 piR-109850 piR-13232  
piR-121676 piR-29074 piR-129336  
piR-15597 piR-134300 piR-1286  
piR-110215 piR-118612 piR-128161  
piR-28575 piR-112352 piR-127294  
piR-105217 piR-141954 piR-126376  
piR-6009 piR-139289 piR-12465  
piR-116678 piR-126623 piR-122529  
piR-142579 piR-125393 piR-121481  
piR-108743 piR-116099 piR-117097  
piR-138719 piR-104230 piR-113947  
piR-1442 piR-140280 piR-113848  
piR-104973 piR-112577 piR-1077  
piR-138599 piR-103914 piR-9055  
piR-8319 piR-100882 piR-19352  
piR-29944 piR-17461 piR-18872  
piR-114309 piR-131282 piR-18855  
piR-124480 piR-114492 piR-18730  
piR-103664 piR-110693 piR-1500  
piR-132902 piR-108267 piR-14439  
piR-3313 piR-19589 piR-142417  
piR-136490 piR-15415 piR-134495  
piR-6978 piR-133041 piR-132232  
piR-4810 piR-126895 piR-12685  
piR-29763 piR-4723 piR-117503  
piR-119112 piR-105379 piR-117462  
piR-135510 piR-114587 piR-113810  
piR-108793 piR-111838 piR-108333  
piR-3213 piR-3254 piR-108011  
piR-117046 piR-100337 piR-103830  
piR-9315 piR-135565 piR-103566  
piR-142652 piR-100148 piR-103516  
piR-121728 piR-141977 piR-101085  
piR-136210 piR-137706 piR-100185  
piR-127682 piR-124699 piR-9430  
piR-130539 piR-119916 piR-29552  
piR-7855 piR-117354 piR-23454  
piR-107978 piR-113170 piR-139206  
piR-113537 piR-106467 piR-138557  
piR-103370 piR-127349 piR-136136  
piR-29823 piR-125843 piR-134492  
piR-130610 piR-135352 piR-133557  
piR-105047 piR-106325 piR-128181  
piR-8282 piR-129244 piR-126445  
piR-133567 piR-14924 piR-124782  
piR-101052 piR-138407 piR-121044  
piR-3487 piR-125340 piR-118747  
piR-21711 piR-110474 piR-117439



piR-121128 piR-141865 piR-115556  
piR-136518 piR-126031 piR-114429  
piR-4805 piR-117910 piR-106766  
piR-119986 piR-21439 piR-103428  
piR-8357 piR-140774 piR-102361  
piR-16367 piR-101109 piR-100249  
piR-133811 piR-6022 piR-96  
piR-129870 piR-25535 piR-924  
piR-122915 piR-141666 piR-8912  
piR-21622 piR-119772 piR-4865  
piR-102238 piR-113916 piR-395  
piR-141034 piR-110554 piR-3802  
piR-130370 piR-110157 piR-28007  
piR-108197 piR-8438 piR-27662  
piR-138535 piR-3520 piR-22731  
piR-111225 piR-21813 piR-21970  
piR-137787 piR-135386 piR-196  
piR-134944 piR-107691 piR-1876  
piR-133836 piR-132301 piR-16330  
piR-127860 piR-131006 piR-1543  
piR-141042 piR-106299 piR-141235  
piR-112134 piR-100478 piR-140881  
piR-105413 piR-29431 piR-140829  
piR-117179 piR-15872 piR-132367  
piR-116233 piR-121222 piR-129075  
piR-121945 piR-116456 piR-127528  
piR-117788 piR-131622 piR-124950  
piR-4813 piR-112501 piR-1249  
piR-8107 piR-140661 piR-124  
piR-5381 piR-135408 piR-119778  
piR-29930 piR-126140 piR-119388  
piR-113718 piR-101849 piR-116207  
piR-103158 piR-6712 piR-116010  
piR-139116 piR-140370 piR-113456  
piR-139516 piR-140034 piR-112921  
piR-118005 piR-12853 piR-112912  
piR-28098 piR-123992 piR-106726  
piR-118428 piR-109345 piR-105874  
piR-15066 piR-127077 piR-105697  
piR-106821 piR-100676 piR-102564  
piR-139619 piR-100173 piR-102344  
piR-137248 piR-126378 piR-101969  
piR-123134 piR-428 piR-101527  
piR-100176 piR-2977 piR-101490  
piR-141722 piR-128547 piR-100990  
piR-130900 piR-116534 piR-9480  
piR-5765 piR-8433 piR-810  
piR-15723 piR-141044 piR-28538  
piR-128997 piR-8140 piR-25820  
piR-142413 piR-129322 piR-24754  
piR-102722 piR-108113 piR-22005  
piR-109506 piR-101745 piR-1888  
piR-8389 piR-8957 piR-18732  
piR-120829 piR-29746 piR-18536

piR-20089 piR-19893 piR-18028  
piR-10742 piR-14119 piR-16264  
piR-113689 piR-123355 piR-138202  
piR-142061 piR-122912 piR-136072  
piR-138247 piR-111014 piR-136048  
piR-139852 piR-132212 piR-135938  
piR-135715 piR-106876 piR-134469  
piR-137728 piR-105278 piR-133199  
piR-105403 piR-16576 piR-131142  
piR-135820 piR-131615 piR-127936  
piR-129399 piR-115860 piR-126205  
piR-102009 piR-139271 piR-124381  
piR-106278 piR-116495 piR-124349  
piR-8984 piR-113976 piR-122560  
piR-125594 piR-113712 piR-12248  
piR-118804 piR-108459 piR-122302  
piR-15168 piR-142256 piR-110750  
piR-118169 piR-120593 piR-10954  
piR-29142 piR-118190 piR-109429  
piR-114113 piR-116231 piR-107620  
piR-106397 piR-111282 piR-103250  
piR-118740 piR-104395 piR-102503  
piR-129876 piR-102451 piR-101608  
piR-113013 piR-101609 piR-101605  
piR-127751 piR-8286 piR-8427  
piR-26224 piR-130679 piR-673  
piR-3979 piR-115101 piR-6494  
piR-100139 piR-109208 piR-5094  
piR-23849 piR-129004 piR-29711  
piR-122610 piR-111013 piR-29697  
piR-114805 piR-10563 piR-2827  
piR-29942 piR-131606 piR-27918  
piR-9002 piR-128688 piR-27099  
piR-131417 piR-19683 piR-2603  
piR-134847 piR-127776 piR-22548  
piR-125939 piR-125333 piR-15204  
piR-103086 piR-119563 piR-141847  
piR-15416 piR-114867 piR-139939  
piR-131109 piR-114401 piR-138283  
piR-139980 piR-104431 piR-137115  
piR-120558 piR-136226 piR-136116  
piR-118338 piR-138577 piR-134284  
piR-133770 piR-131820 piR-133961  
piR-125668 piR-120669 piR-132807  
piR-9965 piR-101393 piR-130569  
piR-107984 piR-6949 piR-130182  
piR-29960 piR-140488 piR-129240  
piR-137864 piR-132173 piR-123326  
piR-132084 piR-123130 piR-121918  
piR-136002 piR-15399 piR-119581  
piR-112473 piR-126099 piR-119415  
piR-23689 piR-6567 piR-118598  
piR-133802 piR-16119 piR-117779  
piR-120193 piR-132192 piR-11728

piR-123947 piR-109783 piR-115906  
piR-7884 piR-103166 piR-112980  
piR-23527 piR-101938 piR-111710  
piR-115502 piR-17566 piR-110774  
piR-135685 piR-124823 piR-110267  
piR-138351 piR-103675 piR-109332  
piR-109001 piR-101972 piR-108146  
piR-106473 piR-15340 piR-105673  
piR-4448 piR-131977 piR-100742  
piR-141849 piR-129186 piR-100549  
piR-111122 piR-134679 piR-100182  
piR-127508 piR-115359 piR-9891  
piR-115293 piR-29391 piR-8729  
piR-8815 piR-23857 piR-24694  
piR-17695 piR-126300 piR-21984  
piR-134831 piR-119996 piR-2175  
piR-108515 piR-114148 piR-19538  
piR-113678 piR-112949 piR-19365  
piR-28819 piR-140843 piR-1618  
piR-130803 piR-124354 piR-14442  
piR-5184 piR-111337 piR-141761  
piR-111376 piR-101183 piR-14089  
piR-139872 piR-4997 piR-138934  
piR-8070 piR-16819 piR-13686  
piR-141993 piR-112988 piR-135664  
piR-4799 piR-113667 piR-134791  
piR-4269 piR-131092 piR-130299  
piR-28612 piR-116273 piR-130043  
piR-105655 piR-110651 piR-128149  
piR-115467 piR-105223 piR-12722  
piR-121967 piR-141872 piR-125541  
piR-100135 piR-137145 piR-125244  
piR-132717 piR-121497 piR-124951  
piR-110727 piR-113925 piR-124255  
piR-25232 piR-102408 piR-121884  
piR-12749 piR-28066 piR-121493  
piR-124434 piR-140419 piR-12089  
piR-115847 piR-108107 piR-11721  
piR-141752 piR-132180 piR-11712  
piR-127714 piR-131000 piR-116856  
piR-128446 piR-124376 piR-115732  
piR-116379 piR-109366 piR-111672  
piR-5153 piR-129573 piR-111636  
piR-134284 piR-128199 piR-103221  
piR-102629 piR-121275 piR-103114  
piR-106948 piR-111674 piR-102329  
piR-106214 piR-2097 piR-102202  
piR-133924 piR-112450 piR-10063  
piR-19441 piR-108231 piR-7631  
piR-139201 piR-104973 piR-26641  
piR-27814 piR-103970 piR-25847  
piR-136428 piR-27742 piR-21980  
piR-104941 piR-135759 piR-18726  
piR-104811 piR-123117 piR-18544

|            |            |            |
|------------|------------|------------|
| piR-6960   | piR-120474 | piR-15387  |
| piR-127939 | piR-100047 | piR-140346 |
| piR-122923 | piR-7804   | piR-138388 |
| piR-118152 | piR-14035  | piR-135554 |
| piR-117985 | piR-139269 | piR-134963 |
| piR-108482 | piR-137038 | piR-133613 |
| piR-125328 | piR-125196 | piR-131830 |
| piR-27852  | piR-122132 | piR-1273   |
| piR-116850 | piR-516    | piR-126661 |
| piR-5190   | piR-129355 | piR-123211 |
| piR-113994 | piR-107725 | piR-122717 |
| piR-130444 | piR-2499   | piR-122360 |
| piR-110344 | piR-21509  | piR-122243 |
| piR-8563   | piR-110598 | piR-120135 |
| piR-100560 | piR-104441 | piR-119397 |
| piR-11478  | piR-102884 | piR-114164 |
| piR-25906  | piR-142013 | piR-113230 |
| piR-15032  | piR-113315 | piR-112110 |
| piR-138872 | piR-110866 | piR-110370 |
| piR-101352 | piR-109344 | piR-109736 |
| piR-135426 | piR-108395 | piR-109280 |
| piR-114200 | piR-106596 | piR-106501 |
| piR-5002   | piR-105826 | piR-103039 |
| piR-110343 | piR-141034 | piR-102711 |
| piR-127475 | piR-108152 | piR-100890 |
| piR-9472   | piR-137190 | piR-9150   |
| piR-107618 | piR-135652 | piR-8597   |
| piR-9976   | piR-120875 | piR-4868   |
| piR-136224 | piR-120713 | piR-29298  |
| piR-114261 | piR-108521 | piR-24607  |
| piR-16587  | piR-134377 | piR-19195  |
| piR-107152 | piR-117883 | piR-16064  |
| piR-108440 | piR-117399 | piR-16023  |
| piR-9206   | piR-107802 | piR-14821  |
| piR-28235  | piR-136550 | piR-141550 |
| piR-1317   | piR-134695 | piR-14085  |
| piR-140018 | piR-124069 | piR-138018 |
| piR-126795 | piR-112852 | piR-132901 |
| piR-28301  | piR-100680 | piR-130270 |
| piR-137391 | piR-124559 | piR-129283 |
| piR-737    | piR-18512  | piR-128703 |
| piR-122000 | piR-106817 | piR-128533 |
| piR-119996 | piR-101492 | piR-127529 |
| piR-682    | piR-5195   | piR-1251   |
| piR-102246 | piR-18871  | piR-124919 |
| piR-5897   | piR-3256   | piR-124793 |
| piR-136206 | piR-27822  | piR-124388 |
| piR-112356 | piR-2404   | piR-12422  |
| piR-12328  | piR-23856  | piR-121202 |
| piR-142553 | piR-140337 | piR-12011  |
| piR-138488 | piR-137976 | piR-118177 |
| piR-127643 | piR-129227 | piR-118161 |
| piR-121541 | piR-121062 | piR-114080 |
| piR-111532 | piR-140427 | piR-111236 |

piR-4695 piR-138132 piR-108115  
piR-128716 piR-119508 piR-103677  
piR-119751 piR-115516 piR-7370  
piR-108038 piR-107937 piR-5415  
piR-21620 piR-24621 piR-4968  
piR-130434 piR-138719 piR-4522  
piR-6548 piR-133554 piR-30011  
piR-23725 piR-127775 piR-29450  
piR-19530 piR-119754 piR-27333  
piR-101665 piR-118930 piR-25694  
piR-111162 piR-114285 piR-25021  
piR-3234 piR-107963 piR-2330  
piR-123450 piR-103198 piR-21975  
piR-112740 piR-22666 piR-21706  
piR-130017 piR-141890 piR-20981  
piR-107497 piR-6310 piR-20523  
piR-138233 piR-2553 piR-19411  
piR-106301 piR-21335 piR-19151  
piR-109715 piR-133586 piR-1902  
piR-11308 piR-118842 piR-18937  
piR-101154 piR-113299 piR-18030  
piR-131769 piR-111293 piR-15198  
piR-116859 piR-107254 piR-14750  
piR-19582 piR-100564 piR-140219  
piR-125806 piR-28067 piR-139964  
piR-129349 piR-137460 piR-135143  
piR-27761 piR-130662 piR-13117  
piR-122512 piR-115124 piR-130894  
piR-116016 piR-22252 piR-12759  
piR-100827 piR-137173 piR-127109  
piR-18751 piR-135339 piR-12684  
piR-120474 piR-119421 piR-126290  
piR-112501 piR-113476 piR-125109  
piR-131197 piR-103039 piR-122270  
piR-2806 piR-102336 piR-12155  
piR-131694 piR-142152 piR-120232  
piR-16688 piR-128336 piR-120221  
piR-103215 piR-124462 piR-119667  
piR-7492 piR-123533 piR-119594  
piR-3795 piR-114514 piR-119222  
piR-137543 piR-103199 piR-119018  
piR-129186 piR-9989 piR-119003  
piR-25395 piR-138562 piR-118328  
piR-10984 piR-115523 piR-117178  
piR-129225 piR-112123 piR-113801  
piR-131149 piR-110459 piR-112816  
piR-117292 piR-13462 piR-112120  
piR-113712 piR-124746 piR-110900  
piR-136601 piR-106347 piR-110858  
piR-121605 piR-15195 piR-110689  
piR-113467 piR-13928 piR-109297  
piR-112668 piR-131261 piR-108125  
piR-105077 piR-128079 piR-107145  
piR-129882 piR-121218 piR-106573

piR-112794 piR-104630 piR-10467  
piR-2344 piR-101723 piR-104263  
piR-101893 piR-17785 piR-101630  
piR-103914 piR-123447 piR-100668  
piR-22766 piR-119225 piR-100054  
piR-102493 piR-11308 piR-98  
piR-142661 piR-104272 piR-9406  
piR-114456 piR-27915 piR-8995  
piR-14921 piR-138838 piR-792  
piR-12986 piR-137371 piR-5590  
piR-6019 piR-116937 piR-4967  
piR-3977 piR-111322 piR-3847  
piR-129987 piR-133827 piR-3832  
piR-24313 piR-101406 piR-29025  
piR-118842 piR-20979 piR-25682  
piR-3942 piR-136113 piR-25441  
piR-20834 piR-119921 piR-23543  
piR-120242 piR-117188 piR-23452  
piR-104069 piR-15496 piR-2157  
piR-123928 piR-138080 piR-21450  
piR-129715 piR-129197 piR-20498  
piR-3515 piR-118533 piR-19902  
piR-109762 piR-108692 piR-141384  
piR-111442 piR-100319 piR-139809  
piR-13016 piR-138281 piR-136236  
piR-23823 piR-118076 piR-135548  
piR-136499 piR-25533 piR-132833  
piR-105634 piR-130585 piR-132492  
piR-137842 piR-127308 piR-131783  
piR-116986 piR-105296 piR-131584  
piR-104079 piR-4192 piR-128795  
piR-18808 piR-139192 piR-128299  
piR-29753 piR-13897 piR-124169  
piR-10190 piR-114771 piR-123820  
piR-104014 piR-110293 piR-121175  
piR-2795 piR-23399 piR-120413  
piR-135500 piR-135108 piR-119040  
piR-108196 piR-133527 piR-118128  
piR-106654 piR-123778 piR-118020  
piR-130735 piR-112730 piR-116910  
piR-120724 piR-125018 piR-116251  
piR-6865 piR-25007 piR-115741  
piR-122022 piR-124159 piR-106867  
piR-130743 piR-107407 piR-105910  
piR-110597 piR-115141 piR-105601  
piR-9291 piR-110444 piR-104717  
piR-25438 piR-103296 piR-102484  
piR-141762 piR-115339 piR-102272  
piR-103617 piR-114582 piR-101765  
piR-101749 piR-113481 piR-1008  
piR-114419 piR-107788 piR-97  
piR-108719 piR-14553 piR-9067  
piR-17114 piR-142384 piR-8789  
piR-133337 piR-140621 piR-8728

piR-137704 piR-131213 piR-7826  
piR-103212 piR-126759 piR-5985  
piR-112107 piR-121473 piR-5008  
piR-30004 piR-117837 piR-30017  
piR-124286 piR-103513 piR-28792  
piR-120267 piR-137866 piR-28104  
piR-121007 piR-136510 piR-27461  
piR-117765 piR-135480 piR-26486  
piR-113945 piR-134593 piR-25346  
piR-120180 piR-128828 piR-25249  
piR-6018 piR-119883 piR-24478  
piR-3969 piR-117882 piR-23178  
piR-14097 piR-116806 piR-22839  
piR-113265 piR-125262 piR-21971  
piR-14404 piR-118510 piR-17601  
piR-115523 piR-112522 piR-14305  
piR-101101 piR-103086 piR-142567  
piR-14866 piR-5881 piR-142281  
piR-131970 piR-25215 piR-142143  
piR-110961 piR-119249 piR-142100  
piR-141526 piR-19885 piR-141075  
piR-134611 piR-127623 piR-138325  
piR-103761 piR-102199 piR-138000  
piR-107982 piR-102132 piR-135854  
piR-141706 piR-139985 piR-135765  
piR-131703 piR-134456 piR-132620  
piR-123515 piR-124754 piR-132553  
piR-122669 piR-104840 piR-132512  
piR-100903 piR-25412 piR-131410  
piR-2977 piR-15050 piR-131017  
piR-133733 piR-136582 piR-130904  
piR-127611 piR-123434 piR-130733  
piR-28462 piR-118338 piR-127698  
piR-7953 piR-100749 piR-127619  
piR-137689 piR-17439 piR-125012  
piR-118378 piR-14820 piR-123405  
piR-22034 piR-136503 piR-123082  
piR-105195 piR-130723 piR-123046  
piR-16627 piR-126507 piR-117919  
piR-102710 piR-19894 piR-117741  
piR-8584 piR-13187 piR-117453  
piR-130653 piR-130557 piR-116475  
piR-16134 piR-109472 piR-11292  
piR-108192 piR-136751 piR-11222  
piR-122634 piR-103868 piR-111816  
piR-117655 piR-15409 piR-110984  
piR-6885 piR-142070 piR-110673  
piR-129437 piR-138219 piR-108642  
piR-102938 piR-123418 piR-107859  
piR-122755 piR-108843 piR-103381  
piR-110996 piR-18982 piR-103179  
piR-102739 piR-136586 piR-102414  
piR-122507 piR-120694 piR-7885  
piR-129209 piR-120106 piR-6505

|            |            |            |
|------------|------------|------------|
| piR-29998  | piR-112077 | piR-6153   |
| piR-27953  | piR-110472 | piR-5497   |
| piR-138260 | piR-106113 | piR-5224   |
| piR-108655 | piR-142333 | piR-4719   |
| piR-6692   | piR-128298 | piR-471    |
| piR-103282 | piR-108862 | piR-4693   |
| piR-136100 | piR-100637 | piR-4094   |
| piR-109990 | piR-139594 | piR-29798  |
| piR-119349 | piR-132540 | piR-29435  |
| piR-134456 | piR-120772 | piR-28165  |
| piR-121729 | piR-105776 | piR-28061  |
| piR-110698 | piR-6295   | piR-27573  |
| piR-103464 | piR-129225 | piR-25849  |
| piR-137038 | piR-122668 | piR-25321  |
| piR-121490 | piR-111763 | piR-24946  |
| piR-134730 | piR-24457  | piR-24902  |
| piR-5206   | piR-22138  | piR-20046  |
| piR-107431 | piR-122596 | piR-19127  |
| piR-131997 | piR-121858 | piR-17489  |
| piR-111506 | piR-113788 | piR-17115  |
| piR-26424  | piR-106900 | piR-16881  |
| piR-134368 | piR-106762 | piR-16596  |
| piR-29888  | piR-106751 | piR-141152 |
| piR-134462 | piR-133637 | piR-139255 |
| piR-119076 | piR-132600 | piR-13561  |
| piR-124323 | piR-130298 | piR-133700 |
| piR-137613 | piR-124180 | piR-13028  |
| piR-123079 | piR-104416 | piR-130090 |
| piR-25144  | piR-6034   | piR-12743  |
| piR-135552 | piR-142356 | piR-126793 |
| piR-108332 | piR-141007 | piR-126498 |
| piR-136823 | piR-126826 | piR-123595 |
| piR-112811 | piR-118795 | piR-122653 |
| piR-112009 | piR-108129 | piR-120223 |
| piR-387    | piR-105080 | piR-117316 |
| piR-28930  | piR-100184 | piR-116123 |
| piR-7719   | piR-8334   | piR-115044 |
| piR-26760  | piR-28942  | piR-113811 |
| piR-104250 | piR-136354 | piR-110987 |
| piR-6345   | piR-122256 | piR-107007 |
| piR-1483   | piR-115082 | piR-106220 |
| piR-141910 | piR-101987 | piR-102963 |
| piR-13023  | piR-100652 | piR-100784 |
| piR-107796 | piR-27939  | piR-100364 |
| piR-28067  | piR-140596 | piR-100271 |
| piR-122767 | piR-128365 | piR-9471   |
| piR-135423 | piR-127486 | piR-898    |
| piR-101992 | piR-109392 | piR-7466   |
| piR-129669 | piR-106367 | piR-498    |
| piR-128913 | piR-129351 | piR-4474   |
| piR-101423 | piR-115660 | piR-3603   |
| piR-136427 | piR-112546 | piR-29896  |
| piR-11624  | piR-15066  | piR-29712  |
| piR-142693 | piR-133951 | piR-2860   |



|            |            |            |
|------------|------------|------------|
| piR-3010   | piR-133402 | piR-27604  |
| piR-113351 | piR-130612 | piR-26889  |
| piR-112288 | piR-109719 | piR-26793  |
| piR-105417 | piR-109225 | piR-26202  |
| piR-2954   | piR-107754 | piR-22849  |
| piR-104157 | piR-29143  | piR-22767  |
| piR-122883 | piR-140073 | piR-22130  |
| piR-118306 | piR-113953 | piR-20168  |
| piR-132803 | piR-107090 | piR-18875  |
| piR-23996  | piR-103946 | piR-18823  |
| piR-112557 | piR-115663 | piR-18555  |
| piR-100660 | piR-101816 | piR-140755 |
| piR-21324  | piR-115013 | piR-137822 |
| piR-16206  | piR-6707   | piR-137122 |
| piR-141105 | piR-127212 | piR-136922 |
| piR-101809 | piR-118841 | piR-134790 |
| piR-107832 | piR-118378 | piR-133781 |
| piR-126518 | piR-107288 | piR-132668 |
| piR-104757 | piR-104462 | piR-130699 |
| piR-24695  | piR-133368 | piR-128441 |
| piR-107653 | piR-4695   | piR-124701 |
| piR-135346 | piR-136002 | piR-124361 |
| piR-11007  | piR-133570 | piR-123735 |
| piR-120901 | piR-126437 | piR-122768 |
| piR-105530 | piR-113115 | piR-121012 |
| piR-106535 | piR-112430 | piR-120348 |
| piR-28445  | piR-106932 | piR-120126 |
| piR-126110 | piR-106856 | piR-120085 |
| piR-104879 | piR-100592 | piR-119967 |
| piR-141691 | piR-100216 | piR-119380 |
| piR-134409 | piR-29464  | piR-119269 |
| piR-117326 | piR-102696 | piR-117221 |
| piR-106706 | piR-5886   | piR-114562 |
| piR-2249   | piR-2388   | piR-113093 |
| piR-134292 | piR-140960 | piR-111011 |
| piR-122778 | piR-133894 | piR-11068  |
| piR-136672 | piR-127685 | piR-110523 |
| piR-7857   | piR-123747 | piR-109070 |
| piR-21512  | piR-116802 | piR-107780 |
| piR-131893 | piR-113833 | piR-106745 |
| piR-113841 | piR-106679 | piR-106435 |
| piR-105275 | piR-142460 | piR-1042   |
| piR-102173 | piR-139311 | piR-10377  |
| piR-17271  | piR-134152 | piR-102253 |
| piR-119191 | piR-132793 | piR-101778 |
| piR-27444  | piR-107267 | piR-9795   |
| piR-126092 | piR-106030 | piR-9117   |
| piR-139302 | piR-14204  | piR-8686   |
| piR-16889  | piR-141192 | piR-4969   |
| piR-112434 | piR-13570  | piR-4452   |
| piR-105314 | piR-123928 | piR-396    |
| piR-139659 | piR-114885 | piR-3841   |
| piR-116439 | piR-25171  | piR-3400   |
| piR-3084   | piR-121792 | piR-2989   |

piR-15194 piR-118680 piR-29327  
piR-120445 piR-110540 piR-28913  
piR-5412 piR-105112 piR-28499  
piR-128775 piR-131508 piR-27964  
piR-29439 piR-126096 piR-2753  
piR-126981 piR-104002 piR-26729  
piR-119730 piR-103649 piR-25616  
piR-116190 piR-103530 piR-24348  
piR-109016 piR-5653 piR-21218  
piR-9724 piR-4018 piR-20  
piR-139661 piR-16134 piR-19904  
piR-100761 piR-137316 piR-17691  
piR-140952 piR-124773 piR-141459  
piR-129219 piR-124418 piR-135391  
piR-11339 piR-121289 piR-134662  
piR-103088 piR-110290 piR-134393  
piR-12011 piR-3 piR-133412  
piR-136859 piR-142010 piR-133267  
piR-140425 piR-104090 piR-132105  
piR-104208 piR-13960 piR-131989  
piR-18398 piR-134605 piR-131214  
piR-28598 piR-128673 piR-129777  
piR-14844 piR-140000 piR-128242  
piR-140439 piR-116033 piR-128215  
piR-130744 piR-112175 piR-127497  
piR-106077 piR-124370 piR-12740  
piR-121313 piR-102618 piR-126930  
piR-9964 piR-128666 piR-126776  
piR-129698 piR-127761 piR-125763  
piR-114380 piR-118669 piR-125475  
piR-118787 piR-113907 piR-124053  
piR-107852 piR-112053 piR-123849  
piR-128459 piR-121106 piR-12344  
piR-9527 piR-101427 piR-122483  
piR-25241 piR-128824 piR-122078  
piR-104491 piR-121329 piR-121721  
piR-139575 piR-117982 piR-120625  
piR-111704 piR-113054 piR-120409  
piR-124513 piR-591 piR-119873  
piR-100601 piR-113333 piR-119162  
piR-107740 piR-11187 piR-117215  
piR-105236 piR-118890 piR-116283  
piR-129098 piR-111217 piR-115043  
piR-134918 piR-106070 piR-114774  
piR-14425 piR-103264 piR-114065  
piR-122358 piR-100079 piR-113793  
piR-106564 piR-140763 piR-113602  
piR-105379 piR-131802 piR-112944  
piR-25400 piR-101012 piR-111045  
piR-18001 piR-109821 piR-110994  
piR-120631 piR-5793 piR-108737  
piR-105993 piR-120634 piR-10728  
piR-14520 piR-107889 piR-106338  
piR-126526 piR-100334 piR-106191

piR-132648 piR-1508 piR-104383  
piR-130846 piR-134903 piR-103803  
piR-115299 piR-13084 piR-102435  
piR-103966 piR-122235 piR-102081  
piR-125262 piR-119204 piR-101970  
piR-13664 piR-106038 piR-101447  
piR-12163 piR-101370 piR-100965  
piR-28212 piR-21832 piR-9690  
piR-19476 piR-19452 piR-8715  
piR-124455 piR-131071 piR-8640  
piR-104805 piR-114665 piR-8340  
piR-104355 piR-100147 piR-8283  
piR-8354 piR-5322 piR-7967  
piR-4360 piR-471 piR-674  
piR-20782 piR-132367 piR-6628  
piR-111346 piR-122854 piR-29656  
piR-116772 piR-108126 piR-28234  
piR-108452 piR-20649 piR-26469  
piR-119642 piR-124022 piR-24945  
piR-29646 piR-111179 piR-249  
piR-4034 piR-19884 piR-24244  
piR-139804 piR-138336 piR-23842  
piR-100473 piR-126594 piR-22603  
piR-125152 piR-121311 piR-19612  
piR-2220 piR-113764 piR-19040  
piR-15484 piR-105608 piR-18725  
piR-134690 piR-7535 piR-18632  
piR-19227 piR-129219 piR-16541  
piR-26188 piR-116692 piR-15057  
piR-124148 piR-115446 piR-142410  
piR-103757 piR-112500 piR-141681  
piR-123397 piR-13629 piR-140805  
piR-111671 piR-131701 piR-140095  
piR-106903 piR-128196 piR-138562  
piR-125371 piR-132229 piR-137627  
piR-27391 piR-121274 piR-136963  
piR-24419 piR-114762 piR-135646  
piR-111846 piR-111575 piR-135609  
piR-27629 piR-109137 piR-134887  
piR-125704 piR-107881 piR-134056  
piR-109860 piR-106012 piR-132711  
piR-102496 piR-100615 piR-130242  
piR-28093 piR-20722 piR-129764  
piR-139648 piR-16803 piR-128855  
piR-29289 piR-15398 piR-126881  
piR-26045 piR-14410 piR-126624  
piR-122677 piR-137314 piR-126191  
piR-2405 piR-137296 piR-123466  
piR-129327 piR-133789 piR-12279  
piR-126969 piR-129484 piR-122776  
piR-15113 piR-128976 piR-119687  
piR-135799 piR-125873 piR-119234  
piR-130210 piR-122958 piR-11815  
piR-108019 piR-119005 piR-118002

piR-139953 piR-112918 piR-116620  
piR-104359 piR-100591 piR-115792  
piR-106118 piR-9237 piR-115255  
piR-105288 piR-128872 piR-115012  
piR-102756 piR-127317 piR-114689  
piR-78 piR-16683 piR-114295  
piR-131644 piR-132849 piR-114071  
piR-136352 piR-122742 piR-113795  
piR-136558 piR-118333 piR-112042  
piR-136012 piR-114274 piR-111860  
piR-135834 piR-134599 piR-110488  
piR-25632 piR-128035 piR-109273  
piR-14649 piR-118538 piR-108867  
piR-135371 piR-111765 piR-108600  
piR-118181 piR-111449 piR-107464  
piR-100031 piR-108142 piR-106852  
piR-138921 piR-20873 piR-106740  
piR-25523 piR-128881 piR-106674  
piR-23508 piR-123105 piR-106650  
piR-136425 piR-116182 piR-105517  
piR-27851 piR-140153 piR-103416  
piR-27038 piR-126891 piR-103406  
piR-12820 piR-123415 piR-102843  
piR-106335 piR-111576 piR-101517  
piR-14281 piR-110917 piR-100039  
piR-105729 piR-130722 piR-9868  
piR-102361 piR-130452 piR-9779  
piR-103238 piR-112422 piR-8936  
piR-124568 piR-111260 piR-8837  
piR-102449 piR-7978 piR-6850  
piR-1486 piR-137578 piR-652  
piR-3802 piR-130101 piR-5368  
piR-103264 piR-124212 piR-4170  
piR-28717 piR-113906 piR-344  
piR-15203 piR-110579 piR-29393  
piR-20191 piR-109212 piR-28396  
piR-115753 piR-104858 piR-27593  
piR-120329 piR-6593 piR-27425  
piR-3753 piR-15312 piR-26224  
piR-131949 piR-15032 piR-24822  
piR-128952 piR-138422 piR-23413  
piR-130025 piR-119069 piR-20292  
piR-137244 piR-113061 piR-19916  
piR-122491 piR-111508 piR-19853  
piR-7212 piR-140103 piR-19042  
piR-116414 piR-138506 piR-18560  
piR-110483 piR-126338 piR-17386  
piR-124937 piR-121589 piR-17285  
piR-123008 piR-118145 piR-16516  
piR-29691 piR-113955 piR-140083  
piR-128495 piR-29503 piR-138240  
piR-107872 piR-1529 piR-137691  
piR-107790 piR-140441 piR-136540  
piR-115452 piR-115031 piR-134732

piR-28042 piR-23229 piR-13257  
piR-20784 piR-130803 piR-132393  
piR-110066 piR-124506 piR-132346  
piR-122422 piR-118742 piR-132323  
piR-23606 piR-117711 piR-132013  
piR-15114 piR-19338 piR-131686  
piR-28378 piR-128789 piR-131598  
piR-12493 piR-128250 piR-130873  
piR-14119 piR-120837 piR-128326  
piR-118947 piR-104208 piR-12535  
piR-20355 piR-103214 piR-124499  
piR-100122 piR-101803 piR-121730  
piR-126972 piR-128905 piR-120759  
piR-118795 piR-124068 piR-12015  
piR-112025 piR-122273 piR-119649  
piR-104321 piR-120822 piR-119042  
piR-4510 piR-100178 piR-118074  
piR-125696 piR-30000 piR-117950  
piR-28700 piR-140013 piR-114187  
piR-116572 piR-134758 piR-11351  
piR-132605 piR-13342 piR-113346  
piR-120840 piR-120375 piR-112978  
piR-140699 piR-118712 piR-112711  
piR-136942 piR-106685 piR-110959  
piR-121850 piR-104764 piR-110950  
piR-28262 piR-104042 piR-110227  
piR-121218 piR-100031 piR-108455  
piR-120297 piR-122278 piR-1075  
piR-102873 piR-119588 piR-107450  
piR-113216 piR-115154 piR-106769  
piR-23700 piR-110456 piR-104780  
piR-20322 piR-101061 piR-10431  
piR-140326 piR-29408 piR-10214  
piR-139402 piR-24608 piR-102032  
piR-107255 piR-111691 piR-101674  
piR-108659 piR-105062 piR-101239  
piR-126779 piR-100543 piR-100191  
piR-110583 piR-28092 piR-972  
piR-102213 piR-15369 piR-933  
piR-121442 piR-137671 piR-918  
piR-124461 piR-126659 piR-8619  
piR-108833 piR-110483 piR-8511  
piR-28611 piR-106029 piR-7979  
piR-14334 piR-105381 piR-7698  
piR-112429 piR-100264 piR-7632  
piR-25684 piR-8576 piR-7613  
piR-134493 piR-142485 piR-7227  
piR-8664 piR-140554 piR-699  
piR-26000 piR-135703 piR-6897  
piR-104914 piR-135685 piR-635  
piR-116618 piR-128919 piR-5429  
piR-103366 piR-121659 piR-4572  
piR-135387 piR-116651 piR-4515  
piR-131387 piR-102722 piR-26929

|            |            |            |
|------------|------------|------------|
| piR-8576   | piR-19234  | piR-25813  |
| piR-110620 | piR-139923 | piR-25196  |
| piR-103005 | piR-135556 | piR-25027  |
| piR-1330   | piR-130505 | piR-22396  |
| piR-120286 | piR-126823 | piR-21563  |
| piR-120065 | piR-123350 | piR-2115   |
| piR-456    | piR-104639 | piR-21083  |
| piR-141379 | piR-103612 | piR-21043  |
| piR-127114 | piR-103240 | piR-20907  |
| piR-126309 | piR-100218 | piR-20633  |
| piR-104590 | piR-3943   | piR-2058   |
| piR-135642 | piR-137056 | piR-20264  |
| piR-118720 | piR-127459 | piR-17032  |
| piR-9098   | piR-113990 | piR-16727  |
| piR-8623   | piR-113573 | piR-16485  |
| piR-24438  | piR-111342 | piR-16     |
| piR-101700 | piR-103607 | piR-15996  |
| piR-8108   | piR-4497   | piR-15336  |
| piR-129632 | piR-22784  | piR-142072 |
| piR-114993 | piR-137878 | piR-14194  |
| piR-14877  | piR-133014 | piR-141081 |
| piR-103440 | piR-131031 | piR-139047 |
| piR-103022 | piR-103583 | piR-137292 |
| piR-106782 | piR-29142  | piR-1362   |
| piR-21483  | piR-15368  | piR-136057 |
| piR-139864 | piR-142388 | piR-135831 |
| piR-141396 | piR-132660 | piR-135257 |
| piR-124924 | piR-128446 | piR-135212 |
| piR-109208 | piR-127602 | piR-132301 |
| piR-6949   | piR-124942 | piR-132140 |
| piR-113925 | piR-110438 | piR-131917 |
| piR-9606   | piR-129426 | piR-131736 |
| piR-106927 | piR-128983 | piR-130741 |
| piR-100724 | piR-120159 | piR-130066 |
| piR-134580 | piR-116200 | piR-129081 |
| piR-111853 | piR-110011 | piR-128864 |
| piR-111361 | piR-106425 | piR-128640 |
| piR-103209 | piR-100984 | piR-128145 |
| piR-140743 | piR-8931   | piR-125061 |
| piR-137009 | piR-19717  | piR-124658 |
| piR-133451 | piR-1926   | piR-123741 |
| piR-103784 | piR-14016  | piR-123576 |
| piR-3256   | piR-123534 | piR-123344 |
| piR-23726  | piR-123239 | piR-122984 |
| piR-10196  | piR-118435 | piR-122668 |
| piR-132301 | piR-115785 | piR-12168  |
| piR-125764 | piR-114357 | piR-120033 |
| piR-119451 | piR-107083 | piR-117727 |
| piR-102519 | piR-103178 | piR-117416 |
| piR-5275   | piR-2458   | piR-11604  |
| piR-137382 | piR-17681  | piR-115309 |
| piR-1233   | piR-13546  | piR-115173 |
| piR-24459  | piR-133337 | piR-115082 |
| piR-134148 | piR-131769 | piR-115035 |

piR-10375 piR-126235 piR-11489  
piR-4923 piR-116878 piR-114634  
piR-134415 piR-115784 piR-113829  
piR-118526 piR-136699 piR-113036  
piR-116806 piR-135078 piR-112563  
piR-102509 piR-130670 piR-112471  
piR-6940 piR-122655 piR-11240  
piR-141826 piR-110449 piR-110438  
piR-138705 piR-109015 piR-109975  
piR-115749 piR-6104 piR-109751  
piR-112594 piR-131195 piR-109080  
piR-2163 piR-125350 piR-109027  
piR-29862 piR-122374 piR-108876  
piR-23708 piR-119159 piR-108694  
piR-140635 piR-106211 piR-107463  
piR-7441 piR-21447 piR-107087  
piR-104168 piR-142075 piR-106887  
piR-138409 piR-135433 piR-106738  
piR-138277 piR-127578 piR-106175  
piR-18205 piR-122291 piR-105122  
piR-118639 piR-120539 piR-104874  
piR-28810 piR-116860 piR-10391  
piR-123673 piR-2536 piR-103821  
piR-109827 piR-16367 piR-101331  
piR-8578 piR-130485 piR-100019  
piR-591 piR-108515 piR-9833  
piR-21989 piR-106222 piR-974  
piR-7927 piR-103116 piR-9008  
piR-24621 piR-8251 piR-8785  
piR-26404 piR-2397 piR-7951  
piR-132348 piR-12903 piR-7780  
piR-127233 piR-29236 piR-7441  
piR-119273 piR-133096 piR-452  
piR-118931 piR-132920 piR-4242  
piR-142715 piR-129929 piR-3354  
piR-7688 piR-129542 piR-29447  
piR-107938 piR-128690 piR-28093  
piR-135347 piR-128607 piR-27827  
piR-125117 piR-110408 piR-276  
piR-118055 piR-502 piR-25954  
piR-104065 piR-16462 piR-25861  
piR-127696 piR-137010 piR-25806  
piR-110271 piR-119116 piR-25564  
piR-104862 piR-118147 piR-24015  
piR-24814 piR-116584 piR-23987  
piR-116182 piR-4696 piR-2367  
piR-130966 piR-22655 piR-23421  
piR-133803 piR-14540 piR-2336  
piR-112812 piR-140056 piR-22563  
piR-15209 piR-108842 piR-21889  
piR-130462 piR-108596 piR-21290  
piR-112309 piR-108391 piR-20892  
piR-105679 piR-20837 piR-20802  
piR-126675 piR-14485 piR-20777

piR-101012 piR-141498 piR-18387  
piR-134536 piR-135634 piR-17648  
piR-103809 piR-134669 piR-17260  
piR-106147 piR-134318 piR-17116  
piR-3229 piR-127815 piR-16921  
piR-102542 piR-133633 piR-16173  
piR-16740 piR-116426 piR-15983  
piR-122441 piR-116368 piR-14351  
piR-107019 piR-6011 piR-141517  
piR-129244 piR-3464 piR-141285  
piR-128624 piR-139200 piR-140791  
piR-109217 piR-138957 piR-140764  
piR-10696 piR-135744 piR-139457  
piR-7495 piR-134409 piR-139450  
piR-140921 piR-130113 piR-139367  
piR-100997 piR-122231 piR-139282  
piR-24183 piR-107224 piR-137956  
piR-28160 piR-28301 piR-137156  
piR-128793 piR-18583 piR-134619  
piR-110636 piR-105196 piR-134499  
piR-27872 piR-16034 piR-134117  
piR-120920 piR-14261 piR-133389  
piR-4997 piR-137598 piR-132605  
piR-131870 piR-132038 piR-13231  
piR-12979 piR-128329 piR-131704  
piR-118637 piR-116073 piR-131332  
piR-3610 piR-114060 piR-131269  
piR-132882 piR-107755 piR-130896  
piR-122071 piR-415 piR-130880  
piR-132055 piR-140213 piR-130609  
piR-12978 piR-130293 piR-130589  
piR-102853 piR-121964 piR-129936  
piR-134903 piR-114450 piR-129807  
piR-122457 piR-101039 piR-129646  
piR-12581 piR-4323 piR-129632  
piR-105428 piR-18759 piR-129139  
piR-111315 piR-138954 piR-128976  
piR-16123 piR-131749 piR-128377  
piR-25759 piR-130854 piR-126758  
piR-13605 piR-124380 piR-126706  
piR-2256 piR-118592 piR-125279  
piR-6795 piR-112829 piR-1250  
piR-108005 piR-29929 piR-124491  
piR-20569 piR-24071 piR-124243  
piR-111114 piR-202 piR-123176  
piR-102292 piR-16741 piR-122939  
piR-5363 piR-141444 piR-12274  
piR-103499 piR-140335 piR-122554  
piR-136541 piR-139739 piR-12150  
piR-118085 piR-139000 piR-121264  
piR-122805 piR-134671 piR-117060  
piR-121373 piR-132305 piR-116509  
piR-138116 piR-11237 piR-116112  
piR-136483 piR-106291 piR-115795



piR-133117 piR-101925 piR-115231  
piR-11558 piR-100156 piR-114517  
piR-2480 piR-2342 piR-114389  
piR-131805 piR-21655 piR-114191  
piR-12111 piR-16121 piR-113723  
piR-107474 piR-140984 piR-112984  
piR-17054 piR-138312 piR-11190  
piR-137643 piR-117722 piR-110567  
piR-117094 piR-114314 piR-110231  
piR-101286 piR-111520 piR-109852  
piR-100979 piR-110672 piR-109804  
piR-18794 piR-28538 piR-107822  
piR-139239 piR-137086 piR-107803  
piR-999 piR-135133 piR-107573  
piR-102222 piR-134923 piR-105822  
piR-117478 piR-131470 piR-105729  
piR-5980 piR-129913 piR-10430  
piR-120183 piR-123791 piR-103343  
piR-8168 piR-101502 piR-102538  
piR-139528 piR-141495 piR-102311  
piR-136984 piR-103251 piR-102069  
piR-111102 piR-118889 piR-956  
piR-28493 piR-29473 piR-9514  
piR-132461 piR-131641 piR-9473  
piR-7817 piR-131226 piR-9262  
piR-141803 piR-127274 piR-9258  
piR-102790 piR-124434 piR-8959  
piR-6184 piR-107722 piR-816  
piR-133776 piR-104892 piR-7571  
piR-137012 piR-100295 piR-6540  
piR-135987 piR-137064 piR-6274  
piR-24498 piR-124502 piR-3467  
piR-111261 piR-117118 piR-3272  
piR-141829 piR-115231 piR-3204  
piR-111559 piR-103992 piR-28768  
piR-16767 piR-29460 piR-28737  
piR-136949 piR-19060 piR-2858  
piR-125896 piR-142653 piR-26951  
piR-121168 piR-134759 piR-25281  
piR-13273 piR-122577 piR-24894  
piR-12865 piR-105889 piR-23675  
piR-11749 piR-104776 piR-23459  
piR-116527 piR-137099 piR-2329  
piR-105109 piR-132850 piR-22203  
piR-140591 piR-123257 piR-22196  
piR-107166 piR-118696 piR-21976  
piR-137048 piR-114671 piR-20710  
piR-118144 piR-113827 piR-20589  
piR-110830 piR-113437 piR-17882  
piR-14256 piR-113206 piR-17299  
piR-142433 piR-110577 piR-16860  
piR-4266 piR-21829 piR-16170  
piR-129111 piR-131970 piR-15972  
piR-128401 piR-123122 piR-142321

piR-103986 piR-114383 piR-141998  
piR-121521 piR-111853 piR-141068  
piR-124333 piR-107489 piR-140823  
piR-6993 piR-4510 piR-140522  
piR-27455 piR-21517 piR-139281  
piR-139485 piR-142226 piR-139069  
piR-103679 piR-140398 piR-138670  
piR-12295 piR-136902 piR-138580  
piR-101862 piR-128999 piR-138522  
piR-7814 piR-111934 piR-135574  
piR-20294 piR-103809 piR-135463  
piR-127139 piR-10322 piR-134933  
piR-105667 piR-101973 piR-134808  
piR-2885 piR-4197 piR-133457  
piR-9814 piR-28787 piR-132797  
piR-29403 piR-2058 piR-132536  
piR-121217 piR-18948 piR-13246  
piR-137754 piR-142501 piR-132385  
piR-9116 piR-139171 piR-132158  
piR-113669 piR-114710 piR-132152  
piR-29295 piR-114445 piR-131484  
piR-139785 piR-107111 piR-130825  
piR-108677 piR-103920 piR-130372  
piR-20649 piR-17208 piR-129991  
piR-121054 piR-137252 piR-12868  
piR-4888 piR-130771 piR-128487  
piR-28733 piR-120033 piR-128314  
piR-25412 piR-106570 piR-128097  
piR-26605 piR-105804 piR-127325  
piR-108985 piR-24589 piR-127234  
piR-119160 piR-2405 piR-126580  
piR-14961 piR-137559 piR-126063  
piR-8167 piR-121934 piR-125089  
piR-131727 piR-117726 piR-125058  
piR-116010 piR-114521 piR-124884  
piR-101320 piR-108089 piR-124805  
piR-24434 piR-106150 piR-123517  
piR-142440 piR-20782 piR-12335  
piR-130038 piR-138373 piR-123115  
piR-100143 piR-13292 piR-122423  
piR-120523 piR-130124 piR-12224  
piR-29489 piR-109611 piR-120862  
piR-110116 piR-104769 piR-120741  
piR-5176 piR-102158 piR-120610  
piR-136306 piR-133425 piR-119943  
piR-106524 piR-132459 piR-119938  
piR-120265 piR-131376 piR-119806  
piR-4924 piR-127256 piR-118466  
piR-29831 piR-123164 piR-118104  
piR-137517 piR-123063 piR-116926  
piR-125945 piR-122141 piR-116402  
piR-112011 piR-115796 piR-115963  
piR-104569 piR-115766 piR-115876  
piR-17398 piR-101706 piR-115630

piR-137620 piR-13818 piR-113982  
piR-14463 piR-137808 piR-113841  
piR-128426 piR-133471 piR-11223  
piR-118372 piR-132854 piR-111809  
piR-115328 piR-129066 piR-111229  
piR-127251 piR-128455 piR-111008  
piR-113580 piR-117393 piR-110249  
piR-106742 piR-106459 piR-110126  
piR-113813 piR-102116 piR-108726  
piR-7818 piR-17534 piR-106976  
piR-3083 piR-15871 piR-105834  
piR-112360 piR-130635 piR-105725  
piR-28472 piR-126093 piR-105332  
piR-27939 piR-121846 piR-1045  
piR-3760 piR-115578 piR-104452  
piR-16576 piR-101268 piR-102381  
piR-139962 piR-15891 piR-10139  
piR-135095 piR-128020 piR-100961  
piR-111123 piR-104624 piR-100298  
piR-133677 piR-18941 piR-9999  
piR-104462 piR-123216 piR-9013  
piR-16664 piR-118937 piR-863  
piR-2229 piR-118174 piR-8256  
piR-15293 piR-118140 piR-7854  
piR-118522 piR-111680 piR-7421  
piR-29171 piR-2088 piR-6979  
piR-133676 piR-19453 piR-6930  
piR-113287 piR-128166 piR-6349  
piR-2874 piR-109274 piR-601  
piR-117409 piR-101340 piR-5160  
piR-116853 piR-101228 piR-5041  
piR-132704 piR-100772 piR-4945  
piR-131903 piR-7965 piR-3532  
piR-12768 piR-1509 piR-29689  
piR-114175 piR-142517 piR-28782  
piR-141182 piR-135678 piR-28114  
piR-118038 piR-127939 piR-27748  
piR-110925 piR-127498 piR-27500  
piR-103585 piR-124824 piR-26283  
piR-20309 piR-122684 piR-25238  
piR-140798 piR-114733 piR-25147  
piR-129748 piR-101690 piR-25116  
piR-115378 piR-20832 piR-24998  
piR-6714 piR-132203 piR-24785  
piR-137882 piR-129696 piR-23479  
piR-110872 piR-119884 piR-22003  
piR-129856 piR-119436 piR-21667  
piR-124370 piR-110176 piR-21058  
piR-119489 piR-109532 piR-20826  
piR-117996 piR-107592 piR-200  
piR-102977 piR-102313 piR-19796  
piR-7078 piR-6672 piR-18842  
piR-5807 piR-6600 piR-18769  
piR-4121 piR-139499 piR-18067

piR-16890 piR-134719 piR-17754  
piR-136457 piR-119920 piR-17417  
piR-119513 piR-114680 piR-1663  
piR-102380 piR-112563 piR-16000  
piR-137371 piR-10470 piR-15172  
piR-4356 piR-103457 piR-142378  
piR-131299 piR-7266 piR-142302  
piR-116194 piR-6019 piR-141524  
piR-102735 piR-27922 piR-140381  
piR-7906 piR-16972 piR-140179  
piR-110640 piR-142542 piR-140098  
piR-109227 piR-136539 piR-139549  
piR-125257 piR-121174 piR-139495  
piR-19264 piR-115689 piR-139422  
piR-135927 piR-114456 piR-138633  
piR-104431 piR-112002 piR-138145  
piR-102752 piR-109729 piR-137719  
piR-119651 piR-106801 piR-137081  
piR-101984 piR-105135 piR-136555  
piR-101379 piR-103519 piR-13609  
piR-1834 piR-21027 piR-134995  
piR-9005 piR-139105 piR-134451  
piR-118917 piR-13095 piR-132473  
piR-131031 piR-12820 piR-131889  
piR-122014 piR-125190 piR-129930  
piR-113458 piR-105401 piR-129534  
piR-11366 piR-105016 piR-129095  
piR-114230 piR-100437 piR-127980  
piR-142707 piR-5623 piR-127905  
piR-132612 piR-26790 piR-127224  
piR-124017 piR-142451 piR-126745  
piR-130236 piR-113696 piR-126364  
piR-25799 piR-108694 piR-126331  
piR-132663 piR-108224 piR-125710  
piR-111840 piR-469 piR-125441  
piR-5818 piR-3415 piR-125043  
piR-130430 piR-21660 piR-124652  
piR-18835 piR-137928 piR-124160  
piR-140659 piR-131070 piR-123668  
piR-138890 piR-128613 piR-122692  
piR-17696 piR-123818 piR-122407  
piR-136593 piR-121723 piR-121251  
piR-112595 piR-118664 piR-120044  
piR-108565 piR-102195 piR-119121  
piR-100041 piR-5275 piR-117173  
piR-129463 piR-15718 piR-114574  
piR-4907 piR-1505 piR-113926  
piR-29695 piR-141713 piR-112740  
piR-120150 piR-132886 piR-112442  
piR-126238 piR-131623 piR-112091  
piR-100303 piR-126461 piR-111498  
piR-6796 piR-112601 piR-111163  
piR-121489 piR-107709 piR-110735  
piR-122559 piR-7085 piR-110186

|            |            |            |
|------------|------------|------------|
| piR-4629   | piR-18386  | piR-109905 |
| piR-18158  | piR-17782  | piR-109266 |
| piR-5891   | piR-139757 | piR-108728 |
| piR-5625   | piR-136913 | piR-108067 |
| piR-3255   | piR-136616 | piR-106672 |
| piR-115870 | piR-135630 | piR-106205 |
| piR-4735   | piR-135409 | piR-104587 |
| piR-24157  | piR-134515 | piR-1034   |
| piR-141977 | piR-134126 | piR-103340 |
| piR-135630 | piR-127433 | piR-102396 |
| piR-103051 | piR-112683 | piR-100458 |
| piR-100149 | piR-107043 | piR-8496   |
| piR-8457   | piR-106534 | piR-6218   |
| piR-7025   | piR-103913 | piR-540    |
| piR-141415 | piR-29182  | piR-30000  |
| piR-129438 | piR-1688   | piR-29933  |
| piR-125119 | piR-141560 | piR-29344  |
| piR-123827 | piR-137817 | piR-28710  |
| piR-137969 | piR-134854 | piR-271    |
| piR-117103 | piR-1216   | piR-26404  |
| piR-134576 | piR-117674 | piR-25235  |
| piR-6373   | piR-107019 | piR-25215  |
| piR-2390   | piR-17727  | piR-25140  |
| piR-142092 | piR-16974  | piR-25003  |
| piR-116105 | piR-15038  | piR-23232  |
| piR-107489 | piR-140173 | piR-22639  |
| piR-29111  | piR-137543 | piR-21982  |
| piR-25950  | piR-129428 | piR-21382  |
| piR-100334 | piR-124154 | piR-21332  |
| piR-130328 | piR-121939 | piR-21194  |
| piR-17272  | piR-112986 | piR-20563  |
| piR-137165 | piR-108921 | piR-19546  |
| piR-127238 | piR-106889 | piR-18200  |
| piR-106735 | piR-24663  | piR-17629  |
| piR-101768 | piR-138187 | piR-17286  |
| piR-9682   | piR-132969 | piR-1594   |
| piR-108295 | piR-130043 | piR-1575   |
| piR-18314  | piR-127253 | piR-15648  |
| piR-114464 | piR-127241 | piR-142634 |
| piR-114285 | piR-124614 | piR-142134 |
| piR-109928 | piR-11566  | piR-141964 |
| piR-107672 | piR-109669 | piR-141600 |
| piR-3862   | piR-105845 | piR-140380 |
| piR-29997  | piR-101513 | piR-139474 |
| piR-116887 | piR-7244   | piR-137924 |
| piR-6957   | piR-6865   | piR-137313 |
| piR-118472 | piR-4932   | piR-137265 |
| piR-7389   | piR-122111 | piR-136124 |
| piR-15886  | piR-119606 | piR-135311 |
| piR-122262 | piR-119189 | piR-135053 |
| piR-19060  | piR-114002 | piR-134669 |
| piR-8677   | piR-136815 | piR-133879 |
| piR-119124 | piR-131711 | piR-133756 |
| piR-102585 | piR-126168 | piR-133423 |

piR-7401 piR-118342 piR-132374  
piR-11319 piR-1953 piR-131875  
piR-7475 piR-137107 piR-131855  
piR-18455 piR-133663 piR-131488  
piR-128195 piR-132327 piR-131442  
piR-8379 piR-132210 piR-130719  
piR-16974 piR-128439 piR-130397  
piR-114614 piR-126040 piR-129911  
piR-113050 piR-115683 piR-129291  
piR-103067 piR-138235 piR-129196  
piR-131402 piR-13252 piR-129020  
piR-18990 piR-128312 piR-128593  
piR-17229 piR-118105 piR-128061  
piR-123009 piR-117101 piR-128003  
piR-102975 piR-115232 piR-12760  
piR-130408 piR-110736 piR-126970  
piR-27965 piR-104841 piR-126763  
piR-115005 piR-102549 piR-126757  
piR-102480 piR-28943 piR-126556  
piR-20106 piR-18054 piR-126541  
piR-100295 piR-138063 piR-126487  
piR-119976 piR-133603 piR-126219  
piR-103457 piR-129326 piR-126025  
piR-121391 piR-128714 piR-125319  
piR-120893 piR-117389 piR-12499  
piR-26498 piR-111256 piR-124967  
piR-100141 piR-109410 piR-124625  
piR-130174 piR-108114 piR-124141  
piR-127616 piR-104881 piR-123621  
piR-25708 piR-28777 piR-123550  
piR-20837 piR-27574 piR-123253  
piR-15324 piR-1486 piR-123189  
piR-119157 piR-132169 piR-122602  
piR-115051 piR-130038 piR-121471  
piR-29192 piR-121147 piR-120835  
piR-117093 piR-119490 piR-120314  
piR-107973 piR-115317 piR-119827  
piR-115197 piR-114809 piR-119661  
piR-138216 piR-113177 piR-119627  
piR-132168 piR-102009 piR-119505  
piR-130127 piR-134378 piR-119227  
piR-117887 piR-133009 piR-119207  
piR-102619 piR-122534 piR-118394  
piR-130429 piR-119994 piR-118063  
piR-100751 piR-117293 piR-11763  
piR-139444 piR-115127 piR-116732  
piR-133438 piR-102552 piR-116225  
piR-28882 piR-971 piR-116158  
piR-25467 piR-15067 piR-113837  
piR-131790 piR-138033 piR-113252  
piR-121997 piR-137350 piR-112989  
piR-27850 piR-133776 piR-112842  
piR-114159 piR-129096 piR-112004  
piR-27739 piR-124668 piR-111888

|            |            |            |
|------------|------------|------------|
| piR-132874 | piR-4493   | piR-111563 |
| piR-142620 | piR-132390 | piR-110666 |
| piR-117907 | piR-130205 | piR-110029 |
| piR-117759 | piR-129534 | piR-109717 |
| piR-3764   | piR-124760 | piR-108182 |
| piR-119427 | piR-122994 | piR-107842 |
| piR-8268   | piR-122232 | piR-107674 |
| piR-12642  | piR-113641 | piR-107244 |
| piR-116508 | piR-112594 | piR-106900 |
| piR-111936 | piR-106493 | piR-10634  |
| piR-130137 | piR-7656   | piR-106242 |
| piR-12465  | piR-29958  | piR-106037 |
| piR-103176 | piR-29394  | piR-105792 |
| piR-28648  | piR-140555 | piR-105655 |
| piR-28333  | piR-135296 | piR-105354 |
| piR-30007  | piR-120172 | piR-105028 |
| piR-125175 | piR-116008 | piR-104317 |
| piR-15075  | piR-112812 | piR-103    |
| piR-12528  | piR-100867 | piR-102712 |
| piR-11629  | piR-4640   | piR-101769 |
| piR-104110 | piR-28133  | piR-101643 |
| piR-100616 | piR-111755 | piR-100186 |
| piR-2109   | piR-106482 | piR-951    |
| piR-138051 | piR-105266 | piR-9164   |
| piR-102166 | piR-104960 | piR-8998   |
| piR-128515 | piR-104706 | piR-8363   |
| piR-116147 | piR-3309   | piR-8320   |
| piR-136796 | piR-135105 | piR-793    |
| piR-115849 | piR-134746 | piR-7300   |
| piR-112579 | piR-127402 | piR-7153   |
| piR-18991  | piR-120853 | piR-6831   |
| piR-14349  | piR-119960 | piR-6482   |
| piR-319    | piR-117516 | piR-6021   |
| piR-3150   | piR-115197 | piR-5978   |
| piR-28213  | piR-108024 | piR-5947   |
| piR-142388 | piR-7997   | piR-559    |
| piR-118380 | piR-141613 | piR-5323   |
| piR-129615 | piR-132614 | piR-5180   |
| piR-100760 | piR-126972 | piR-514    |
| piR-117261 | piR-125790 | piR-4694   |
| piR-133009 | piR-117699 | piR-339    |
| piR-105559 | piR-116344 | piR-2929   |
| piR-101132 | piR-109856 | piR-28840  |
| piR-24177  | piR-107623 | piR-28645  |
| piR-11382  | piR-107047 | piR-28515  |
| piR-11560  | piR-27987  | piR-28511  |
| piR-2936   | piR-25357  | piR-28429  |
| piR-130148 | piR-139756 | piR-28105  |
| piR-112694 | piR-134509 | piR-27989  |
| piR-8061   | piR-13144  | piR-26921  |
| piR-128705 | piR-125882 | piR-25993  |
| piR-120867 | piR-120395 | piR-2593   |
| piR-108360 | piR-114270 | piR-24489  |
| piR-7878   | piR-108567 | piR-23818  |

piR-119332 piR-106479 piR-23576  
piR-104562 piR-101700 piR-22917  
piR-103513 piR-6742 piR-22387  
piR-123313 piR-24939 piR-21989  
piR-11151 piR-21398 piR-21983  
piR-2575 piR-142490 piR-21271  
piR-106392 piR-133310 piR-21263  
piR-9545 piR-128811 piR-20864  
piR-11775 piR-126870 piR-20220  
piR-25088 piR-120037 piR-19283  
piR-129903 piR-115850 piR-18402  
piR-128494 piR-100152 piR-18290  
piR-135367 piR-16122 piR-18150  
piR-129742 piR-118990 piR-17375  
piR-127802 piR-116958 piR-16877  
piR-24724 piR-106668 piR-16100  
piR-104670 piR-104077 piR-15798  
piR-141369 piR-1591 piR-15510  
piR-130990 piR-13448 piR-1497  
piR-10240 piR-133004 piR-14772  
piR-7712 piR-113506 piR-14427  
piR-139000 piR-112221 piR-142508  
piR-136122 piR-111943 piR-14185  
piR-105274 piR-110308 piR-141575  
piR-114039 piR-104685 piR-141289  
piR-11312 piR-102143 piR-140399  
piR-136914 piR-20564 piR-138900  
piR-106152 piR-141164 piR-138293  
piR-371 piR-137453 piR-137660  
piR-140764 piR-132461 piR-136802  
piR-139570 piR-130683 piR-136363  
piR-115554 piR-130595 piR-136202  
piR-8036 piR-124664 piR-136118  
piR-130662 piR-120812 piR-135094  
piR-131456 piR-118545 piR-134564  
piR-2580 piR-108074 piR-134531  
piR-139719 piR-8912 piR-134317  
piR-131053 piR-4836 piR-134088  
piR-101047 piR-3734 piR-133906  
piR-28221 piR-18811 piR-133293  
piR-141820 piR-142294 piR-132644  
piR-9006 piR-134963 piR-132383  
piR-17281 piR-133816 piR-131338  
piR-29994 piR-133050 piR-131066  
piR-136057 piR-131285 piR-130895  
piR-130351 piR-130402 piR-130258  
piR-129506 piR-125714 piR-130212  
piR-128007 piR-120605 piR-130082  
piR-121941 piR-120049 piR-130063  
piR-26391 piR-117505 piR-129351  
piR-4127 piR-108425 piR-129001  
piR-131641 piR-102416 piR-128461  
piR-128833 piR-25439 piR-127981  
piR-115071 piR-2241 piR-12785



piR-120786 piR-135080 piR-12741  
piR-140969 piR-131874 piR-127223  
piR-137148 piR-124472 piR-127138  
piR-110902 piR-102058 piR-127110  
piR-106073 piR-4345 piR-125932  
piR-13105 piR-20547 piR-125549  
piR-104741 piR-15019 piR-125064  
piR-140188 piR-138846 piR-124907  
piR-17296 piR-137853 piR-124648  
piR-114817 piR-137265 piR-12459  
piR-15035 piR-122539 piR-124442  
piR-122568 piR-120724 piR-123109  
piR-29736 piR-114955 piR-122982  
piR-131463 piR-109186 piR-122345  
piR-131679 piR-107518 piR-122049  
piR-130789 piR-106698 piR-12054  
piR-103319 piR-104086 piR-120354  
piR-3866 piR-102515 piR-120038  
piR-124103 piR-25168 piR-120005  
piR-106779 piR-141362 piR-119991  
piR-3873 piR-134951 piR-119565  
piR-28659 piR-134087 piR-119376  
piR-107003 piR-131610 piR-119367  
piR-28234 piR-131531 piR-117875  
piR-139946 piR-123937 piR-117755  
piR-123534 piR-123909 piR-117673  
piR-121354 piR-122778 piR-117653  
piR-101877 piR-117873 piR-117610  
piR-21524 piR-110567 piR-11726  
piR-5120 piR-109048 piR-114841  
piR-130289 piR-136821 piR-11467  
piR-129673 piR-134872 piR-114189  
piR-11612 piR-122442 piR-11402  
piR-110266 piR-11950 piR-113406  
piR-136611 piR-118922 piR-113077  
piR-12533 piR-117300 piR-112900  
piR-113671 piR-108887 piR-112783  
piR-106856 piR-108601 piR-112596  
piR-4944 piR-107259 piR-112293  
piR-3794 piR-5902 piR-110917  
piR-113816 piR-2592 piR-110854  
piR-127212 piR-136388 piR-109918  
piR-110744 piR-133892 piR-109724  
piR-112193 piR-132035 piR-108771  
piR-27718 piR-13190 piR-108544  
piR-128664 piR-125102 piR-108456  
piR-123631 piR-124654 piR-10819  
piR-107371 piR-117156 piR-108178  
piR-4639 piR-116552 piR-107876  
piR-120082 piR-115097 piR-107572  
piR-113904 piR-110746 piR-107540  
piR-136258 piR-108446 piR-106475  
piR-116069 piR-106757 piR-105582  
piR-141402 piR-100073 piR-105524

piR-29379 piR-23935 piR-104219  
piR-8672 piR-135121 piR-103874  
piR-29987 piR-132131 piR-103842  
piR-141798 piR-128844 piR-103655  
piR-134468 piR-117737 piR-1035  
piR-130730 piR-110546 piR-103133  
piR-104216 piR-109948 piR-102988  
piR-19081 piR-104149 piR-102604  
piR-17500 piR-101789 piR-102462  
piR-119885 piR-1924 piR-10234  
piR-100375 piR-142456 piR-10219  
piR-122550 piR-131495 piR-102053  
piR-100845 piR-120094 piR-102044  
piR-126254 piR-117811 piR-101975  
piR-120764 piR-115499 piR-10185  
piR-12426 piR-106810 piR-101567  
piR-13780 piR-105367 piR-100839  
piR-27753 piR-102404 piR-100701  
piR-13704 piR-8698 piR-100686  
piR-109387 piR-141310 piR-100261  
piR-101980 piR-138939 piR-100208  
piR-5785 piR-138723 piR-9342  
piR-107654 piR-128399 piR-9244  
piR-28 piR-127979 piR-9225  
piR-4532 piR-120574 piR-9215  
piR-120637 piR-107071 piR-8423  
piR-28966 piR-28876 piR-8374  
piR-2916 piR-27814 piR-7949  
piR-23739 piR-18371 piR-7784  
piR-141311 piR-16128 piR-7073  
piR-118409 piR-15220 piR-6999  
piR-114828 piR-142241 piR-698  
piR-110492 piR-141548 piR-682  
piR-103410 piR-13091 piR-6452  
piR-9297 piR-124724 piR-6430  
piR-29732 piR-121726 piR-6411  
piR-134744 piR-118482 piR-6157  
piR-130226 piR-117091 piR-5443  
piR-13164 piR-112807 piR-5431  
piR-140056 piR-29999 piR-3974  
piR-101245 piR-20089 piR-3738  
piR-7265 piR-132797 piR-3704  
piR-2679 piR-122073 piR-3499  
piR-131075 piR-119893 piR-3018  
piR-140934 piR-111285 piR-295  
piR-107112 piR-107948 piR-29384  
piR-140882 piR-106289 piR-28605  
piR-13228 piR-2026 piR-28225  
piR-108671 piR-14225 piR-27909  
piR-138916 piR-140215 piR-27904  
piR-110720 piR-138440 piR-26635  
piR-108414 piR-131592 piR-2609  
piR-129620 piR-130003 piR-25604  
piR-107727 piR-129237 piR-24752

piR-101386 piR-112132 piR-24391  
piR-5183 piR-105063 piR-24070  
piR-25007 piR-103019 piR-23982  
piR-141497 piR-102121 piR-23518  
piR-15881 piR-101668 piR-23455  
piR-132615 piR-101381 piR-23035  
piR-106806 piR-100005 piR-22678  
piR-110507 piR-5889 piR-22383  
piR-103107 piR-3837 piR-21532  
piR-135249 piR-18044 piR-21269  
piR-9210 piR-15931 piR-21139  
piR-106781 piR-140003 piR-21029  
piR-2207 piR-138351 piR-19858  
piR-19265 piR-135451 piR-19661  
piR-15876 piR-13417 piR-19520  
piR-133292 piR-133144 piR-19178  
piR-123055 piR-130567 piR-19126  
piR-137853 piR-127357 piR-18850  
piR-11191 piR-12237 piR-18788  
piR-14811 piR-117572 piR-1851  
piR-135787 piR-112153 piR-18504  
piR-133766 piR-101333 piR-18269  
piR-102826 piR-20839 piR-18231  
piR-139277 piR-17035 piR-17983  
piR-128720 piR-140955 piR-17897  
piR-5529 piR-139064 piR-17776  
piR-122742 piR-138930 piR-14741  
piR-29503 piR-131448 piR-141791  
piR-128125 piR-128761 piR-141736  
piR-124689 piR-127805 piR-141615  
piR-111743 piR-125431 piR-141159  
piR-119609 piR-112021 piR-140778  
piR-10547 piR-18969 piR-140602  
piR-28569 piR-1442 piR-140265  
piR-137200 piR-14209 piR-139348  
piR-115983 piR-138993 piR-139314  
piR-5499 piR-129437 piR-138319  
piR-22273 piR-126213 piR-137661  
piR-140715 piR-123966 piR-136942  
piR-141721 piR-122653 piR-136758  
piR-120236 piR-119190 piR-136498  
piR-116858 piR-114534 piR-136167  
piR-6845 piR-113629 piR-136038  
piR-6223 piR-103692 piR-135949  
piR-116220 piR-102919 piR-135711  
piR-136929 piR-28736 piR-135587  
piR-134926 piR-22465 piR-135385  
piR-132585 piR-136623 piR-135228  
piR-18272 piR-123278 piR-134953  
piR-137395 piR-123222 piR-134031  
piR-127776 piR-121690 piR-133785  
piR-123181 piR-121138 piR-133681  
piR-8690 piR-109782 piR-133274  
piR-13818 piR-105146 piR-133045

piR-130665 piR-19993 piR-132074  
piR-28261 piR-130789 piR-131596  
piR-111796 piR-127178 piR-131374  
piR-129898 piR-110748 piR-131058  
piR-109100 piR-106216 piR-130281  
piR-1798 piR-105773 piR-12993  
piR-112679 piR-101027 piR-129116  
piR-109288 piR-8713 piR-129  
piR-142169 piR-141462 piR-128837  
piR-137285 piR-141209 piR-128612  
piR-141036 piR-140798 piR-127366  
piR-116111 piR-123344 piR-126571  
piR-28422 piR-120406 piR-126435  
piR-126564 piR-110063 piR-126214  
piR-106196 piR-14286 piR-126152  
piR-133468 piR-13291 piR-126066  
piR-26943 piR-127628 piR-125937  
piR-100148 piR-123727 piR-125840  
piR-28741 piR-118529 piR-124818  
piR-141707 piR-116952 piR-124736  
piR-139708 piR-113194 piR-124624  
piR-129278 piR-105751 piR-124570  
piR-113663 piR-5874 piR-124498  
piR-113340 piR-4944 piR-124433  
piR-139908 piR-14606 piR-124327  
piR-121095 piR-139079 piR-124221  
piR-142624 piR-138928 piR-123988  
piR-125795 piR-122827 piR-123969  
piR-28412 piR-116280 piR-123912  
piR-138482 piR-111833 piR-123290  
piR-135986 piR-109684 piR-122962  
piR-110803 piR-108304 piR-12294  
piR-106799 piR-104245 piR-122788  
piR-142009 piR-102305 piR-122443  
piR-119893 piR-16120 piR-122180  
piR-125758 piR-133219 piR-1221  
piR-109186 piR-130822 piR-121728  
piR-126407 piR-130463 piR-121515  
piR-122580 piR-127933 piR-121068  
piR-115212 piR-121729 piR-120618  
piR-107529 piR-115078 piR-120379  
piR-137539 piR-113566 piR-120072  
piR-102583 piR-109667 piR-119618  
piR-9520 piR-6154 piR-118964  
piR-140560 piR-28342 piR-118792  
piR-139015 piR-20538 piR-118599  
piR-120555 piR-18920 piR-118447  
piR-108267 piR-15075 piR-11808  
piR-10269 piR-141937 piR-11788  
piR-16593 piR-141772 piR-117847  
piR-3562 piR-135214 piR-117210  
piR-24421 piR-133134 piR-117026  
piR-101436 piR-132816 piR-116561  
piR-117055 piR-126382 piR-116510

piR-104163 piR-125201 piR-11644  
piR-101859 piR-124910 piR-11642  
piR-137297 piR-117113 piR-11618  
piR-119207 piR-117055 piR-116056  
piR-25282 piR-116924 piR-11586  
piR-134841 piR-103453 piR-115605  
piR-124700 piR-142712 piR-115189  
piR-141292 piR-140090 piR-115057  
piR-129554 piR-138712 piR-114478  
piR-123533 piR-136177 piR-114026  
piR-21628 piR-133885 piR-113491  
piR-105785 piR-133738 piR-113165  
piR-141786 piR-131895 piR-11255  
piR-129512 piR-126309 piR-112238  
piR-12933 piR-125265 piR-112153  
piR-4085 piR-116600 piR-112145  
piR-131531 piR-108766 piR-111433  
piR-130220 piR-106873 piR-111388  
piR-12238 piR-10450 piR-111357  
piR-119385 piR-102288 piR-111327  
piR-113299 piR-6980 piR-11093  
piR-111898 piR-142099 piR-110669  
piR-101799 piR-133313 piR-110651  
piR-133671 piR-133211 piR-110323  
piR-13227 piR-132060 piR-110049  
piR-111738 piR-131474 piR-109984  
piR-101519 piR-131183 piR-109374  
piR-140103 piR-123205 piR-10936  
piR-133024 piR-119976 piR-109232  
piR-130439 piR-114213 piR-109209  
piR-135857 piR-111468 piR-109020  
piR-15398 piR-110721 piR-10878  
piR-136821 piR-107574 piR-1085  
piR-16170 piR-104159 piR-108228  
piR-114490 piR-103013 piR-107924  
piR-102825 piR-101610 piR-107589  
piR-3191 piR-24104 piR-107273  
piR-28653 piR-211 piR-107241  
piR-28494 piR-141369 piR-106998  
piR-108113 piR-132974 piR-106968  
piR-102416 piR-132488 piR-106505  
piR-129609 piR-116001 piR-106116  
piR-4914 piR-110623 piR-106090  
piR-23857 piR-110097 piR-105027  
piR-17699 piR-100790 piR-105019  
piR-101406 piR-8003 piR-105013  
piR-13364 piR-20420 piR-104417  
piR-130962 piR-17984 piR-10350  
piR-106293 piR-141505 piR-103443  
piR-123571 piR-140022 piR-10333  
piR-118392 piR-135301 piR-103312  
piR-29293 piR-132704 piR-103085  
piR-133661 piR-122501 piR-103065  
piR-133514 piR-121753 piR-102667

piR-115478 piR-121209 piR-102622  
piR-102521 piR-118117 piR-101222  
piR-133688 piR-11758 piR-101043  
piR-108311 piR-115653 piR-100539  
piR-104015 piR-101682 piR-100163  
piR-8914 piR-7069 piR-958  
piR-116787 piR-28855 piR-9168  
piR-110407 piR-28273 piR-8863  
piR-7593 piR-15391 piR-8625  
piR-18800 piR-139699 piR-8574  
piR-129513 piR-139293 piR-854  
piR-5197 piR-128645 piR-8295  
piR-107046 piR-124917 piR-8188  
piR-9437 piR-123712 piR-7978  
piR-139429 piR-112276 piR-7405  
piR-137863 piR-109985 piR-6622  
piR-141853 piR-109332 piR-6450  
piR-134149 piR-105708 piR-507  
piR-122901 piR-100691 piR-5016  
piR-3786 piR-16832 piR-4375  
piR-2981 piR-1366 piR-3186  
piR-130823 piR-131283 piR-3113  
piR-123931 piR-118836 piR-29618  
piR-104747 piR-118523 piR-27185  
piR-139170 piR-118069 piR-26767  
piR-118591 piR-114900 piR-26652  
piR-107287 piR-113152 piR-26488  
piR-104684 piR-104688 piR-26271  
piR-5274 piR-2428 piR-25430  
piR-102862 piR-137635 piR-24764  
piR-101339 piR-137539 piR-2366  
piR-117293 piR-136206 piR-23167  
piR-112165 piR-133751 piR-22898  
piR-100849 piR-132108 piR-22804  
piR-139506 piR-130015 piR-21977  
piR-8501 piR-124051 piR-21974  
piR-6344 piR-123990 piR-20559  
piR-6668 piR-116793 piR-20423  
piR-2320 piR-113904 piR-20348  
piR-22768 piR-113638 piR-20317  
piR-17179 piR-111860 piR-20156  
piR-12981 piR-108100 piR-20032  
piR-126191 piR-104612 piR-1992  
piR-8844 piR-261 piR-19460  
piR-3988 piR-24662 piR-18865  
piR-123572 piR-19526 piR-1875  
piR-110057 piR-16066 piR-18722  
piR-8273 piR-140693 piR-18629  
piR-5025 piR-137431 piR-18518  
piR-120540 piR-133747 piR-16987  
piR-118032 piR-129286 piR-16893  
piR-104488 piR-128294 piR-16872  
piR-13369 piR-127476 piR-16271  
piR-116402 piR-127289 piR-15789

piR-115768 piR-12163 piR-15511  
piR-108012 piR-120386 piR-15446  
piR-120529 piR-113454 piR-15307  
piR-101485 piR-105347 piR-14489  
piR-25833 piR-7203 piR-142540  
piR-135750 piR-3903 piR-14203  
piR-103337 piR-321 piR-141528  
piR-15341 piR-136617 piR-141513  
piR-137204 piR-134525 piR-141036  
piR-116122 piR-126559 piR-140987  
piR-139007 piR-124857 piR-140945  
piR-12776 piR-123470 piR-139741  
piR-102598 piR-120304 piR-138783  
piR-4635 piR-118496 piR-138131  
piR-13246 piR-108457 piR-137471  
piR-123817 piR-103656 piR-137076  
piR-3046 piR-7811 piR-136886  
piR-104630 piR-21323 piR-136709  
piR-132565 piR-139270 piR-135601  
piR-104024 piR-138331 piR-135315  
piR-2274 piR-134145 piR-135293  
piR-106011 piR-129463 piR-134923  
piR-120373 piR-125464 piR-134735  
piR-26663 piR-117977 piR-134223  
piR-135704 piR-112775 piR-134059  
piR-107643 piR-103207 piR-133  
piR-27878 piR-102736 piR-133264  
piR-140843 piR-101718 piR-133023  
piR-123223 piR-5925 piR-132873  
piR-28595 piR-19013 piR-132792  
piR-123283 piR-138890 piR-132745  
piR-21770 piR-136164 piR-13237  
piR-104529 piR-131689 piR-132238  
piR-24416 piR-129503 piR-132221  
piR-14238 piR-125960 piR-131832  
piR-122218 piR-119235 piR-131583  
piR-110436 piR-110040 piR-131556  
piR-12900 piR-109779 piR-131460  
piR-105628 piR-107272 piR-131345  
piR-100276 piR-107052 piR-131262  
piR-133637 piR-102286 piR-129361  
piR-8202 piR-20884 piR-128151  
piR-19990 piR-16722 piR-127867  
piR-140920 piR-142048 piR-127857  
piR-116799 piR-131812 piR-125810  
piR-107730 piR-13132 piR-125339  
piR-2905 piR-123348 piR-125292  
piR-117168 piR-122229 piR-124989  
piR-116960 piR-112061 piR-124826  
piR-125548 piR-110716 piR-123334  
piR-122612 piR-103183 piR-12325  
piR-6347 piR-29512 piR-122876  
piR-25246 piR-27665 piR-122873  
piR-15023 piR-25246 piR-122837

piR-141911 piR-23784 piR-122394  
piR-117289 piR-16553 piR-122286  
piR-103891 piR-16407 piR-121868  
piR-15409 piR-138427 piR-121750  
piR-8017 piR-13024 piR-11977  
piR-134378 piR-129011 piR-119622  
piR-113766 piR-128475 piR-11894  
piR-127704 piR-116753 piR-118858  
piR-125903 piR-104780 piR-117804  
piR-123786 piR-102453 piR-117663  
piR-5559 piR-6828 piR-11720  
piR-14420 piR-1435 piR-116501  
piR-139889 piR-142544 piR-116450  
piR-118570 piR-141857 piR-116301  
piR-4161 piR-127583 piR-116212  
piR-132021 piR-126591 piR-116163  
piR-8611 piR-117500 piR-115978  
piR-138046 piR-116932 piR-115967  
piR-136162 piR-114369 piR-115878  
piR-118153 piR-113033 piR-115779  
piR-137010 piR-105896 piR-115498  
piR-126031 piR-104099 piR-114368  
piR-121625 piR-101103 piR-114344  
piR-109550 piR-29820 piR-114307  
piR-10565 piR-29542 piR-113364  
piR-3770 piR-16472 piR-113141  
piR-7992 piR-141575 piR-112688  
piR-2558 piR-125771 piR-11224  
piR-132190 piR-114540 piR-112049  
piR-9730 piR-114252 piR-111878  
piR-20900 piR-111437 piR-109718  
piR-131953 piR-108871 piR-109644  
piR-109749 piR-107839 piR-109464  
piR-107721 piR-104328 piR-108461  
piR-3696 piR-103628 piR-108400  
piR-128244 piR-102887 piR-107083  
piR-109829 piR-6344 piR-107014  
piR-137963 piR-132244 piR-106386  
piR-100953 piR-129414 piR-1056  
piR-5070 piR-128769 piR-105591  
piR-24011 piR-127854 piR-104911  
piR-16722 piR-125826 piR-104156  
piR-101827 piR-125665 piR-104119  
piR-100702 piR-123627 piR-103490  
piR-13756 piR-121394 piR-102762  
piR-123064 piR-113609 piR-102444  
piR-105437 piR-10651 piR-102358  
piR-12285 piR-102646 piR-102174  
piR-119660 piR-7853 piR-101590  
piR-102533 piR-29858 piR-101164  
piR-101466 piR-28591 piR-100906  
piR-130315 piR-21448 piR-100753  
piR-113871 piR-20533 piR-100634  
piR-142260 piR-14122 piR-9822



|            |            |           |
|------------|------------|-----------|
| piR-9307   | piR-139479 | piR-9802  |
| piR-8939   | piR-136122 | piR-9656  |
| piR-121499 | piR-132440 | piR-954   |
| piR-119641 | piR-126351 | piR-9353  |
| piR-108292 | piR-123177 | piR-8183  |
| piR-100637 | piR-122285 | piR-7954  |
| piR-138362 | piR-121711 | piR-7830  |
| piR-6342   | piR-114431 | piR-747   |
| piR-112632 | piR-24711  | piR-7423  |
| piR-29699  | piR-20288  | piR-7044  |
| piR-141533 | piR-118513 | piR-623   |
| piR-129373 | piR-116339 | piR-6211  |
| piR-115461 | piR-114799 | piR-6049  |
| piR-112915 | piR-111393 | piR-525   |
| piR-126944 | piR-108688 | piR-4983  |
| piR-28701  | piR-104322 | piR-408   |
| piR-133344 | piR-100317 | piR-4012  |
| piR-126812 | piR-28638  | piR-3872  |
| piR-138832 | piR-128428 | piR-3852  |
| piR-134348 | piR-112854 | piR-3674  |
| piR-121066 | piR-112743 | piR-3633  |
| piR-136447 | piR-24293  | piR-320   |
| piR-136380 | piR-141207 | piR-29986 |
| piR-127021 | piR-139861 | piR-29832 |
| piR-121486 | piR-135300 | piR-2952  |
| piR-119711 | piR-129390 | piR-26654 |
| piR-116984 | piR-126830 | piR-26443 |
| piR-115220 | piR-125614 | piR-26401 |
| piR-103202 | piR-125568 | piR-26323 |
| piR-3296   | piR-122656 | piR-2600  |
| piR-3000   | piR-121844 | piR-25909 |
| piR-2798   | piR-121346 | piR-25627 |
| piR-20044  | piR-116676 | piR-2561  |
| piR-16888  | piR-112441 | piR-25006 |
| piR-141070 | piR-112202 | piR-24971 |
| piR-107745 | piR-109148 | piR-24812 |
| piR-101300 | piR-104863 | piR-24781 |
| piR-131201 | piR-103591 | piR-24751 |
| piR-118871 | piR-100346 | piR-24659 |
| piR-7554   | piR-8511   | piR-24272 |
| piR-6721   | piR-4848   | piR-24163 |
| piR-139415 | piR-3760   | piR-23682 |
| piR-132210 | piR-2818   | piR-2247  |
| piR-10500  | piR-24351  | piR-21864 |
| piR-102548 | piR-16708  | piR-21712 |
| piR-133385 | piR-16654  | piR-21417 |
| piR-10631  | piR-131912 | piR-21237 |
| piR-103905 | piR-122901 | piR-21125 |
| piR-139844 | piR-122863 | piR-20373 |
| piR-127933 | piR-112449 | piR-20178 |
| piR-113691 | piR-109096 | piR-19255 |
| piR-108187 | piR-29967  | piR-1916  |
| piR-136881 | piR-25232  | piR-18303 |
| piR-131143 | piR-24684  | piR-18236 |

piR-106058 piR-140329 piR-17921  
piR-18462 piR-13191 piR-16511  
piR-123350 piR-131658 piR-16372  
piR-131412 piR-130872 piR-16150  
piR-107232 piR-130137 piR-1584  
piR-29533 piR-129912 piR-142607  
piR-28551 piR-128019 piR-142544  
piR-102927 piR-126482 piR-142472  
piR-134035 piR-115376 piR-142245  
piR-113839 piR-112771 piR-142144  
piR-112255 piR-107764 piR-141955  
piR-109534 piR-102721 piR-141744  
piR-108050 piR-309 piR-141705  
piR-27746 piR-135453 piR-141520  
piR-140110 piR-12613 piR-141379  
piR-132347 piR-125213 piR-141339  
piR-104970 piR-103855 piR-140745  
piR-138713 piR-102728 piR-140290  
piR-130696 piR-102247 piR-140272  
piR-116847 piR-5042 piR-140256  
piR-108853 piR-140296 piR-140080  
piR-106751 piR-137347 piR-139143  
piR-103315 piR-134280 piR-138859  
piR-8434 piR-131062 piR-138858  
piR-126342 piR-124092 piR-138671  
piR-107864 piR-122821 piR-1384  
piR-28756 piR-115547 piR-138360  
piR-100763 piR-114096 piR-138177  
piR-100191 piR-113707 piR-137974  
piR-28349 piR-108754 piR-136905  
piR-121533 piR-107197 piR-136814  
piR-119586 piR-107035 piR-136390  
piR-101553 piR-106649 piR-135794  
piR-128099 piR-106491 piR-135735  
piR-125673 piR-8395 piR-135712  
piR-113142 piR-7874 piR-135407  
piR-103583 piR-25522 piR-134811  
piR-139265 piR-139334 piR-134703  
piR-111566 piR-129151 piR-134389  
piR-9607 piR-125384 piR-134028  
piR-133352 piR-121861 piR-133914  
piR-12490 piR-118032 piR-133715  
piR-107071 piR-115955 piR-133181  
piR-13327 piR-115403 piR-133168  
piR-130015 piR-101129 piR-132875  
piR-7594 piR-9572 piR-132647  
piR-102135 piR-9367 piR-132531  
piR-137373 piR-7810 piR-132368  
piR-22905 piR-22710 piR-131898  
piR-126830 piR-20063 piR-131897  
piR-126753 piR-141307 piR-131419  
piR-117312 piR-137172 piR-131325  
piR-11678 piR-125351 piR-131173  
piR-5986 piR-125038 piR-131163

piR-13191 piR-120797 piR-130285  
piR-131459 piR-119649 piR-13027  
piR-11950 piR-115712 piR-130194  
piR-104816 piR-111894 piR-13002  
piR-122827 piR-1109 piR-129564  
piR-119089 piR-108213 piR-129319  
piR-12647 piR-105557 piR-128997  
piR-21621 piR-5423 piR-127976  
piR-130066 piR-138784 piR-127940  
piR-126489 piR-137271 piR-12781  
piR-113833 piR-122517 piR-127043  
piR-5353 piR-116588 piR-127019  
piR-132220 piR-116326 piR-12699  
piR-129639 piR-115298 piR-126933  
piR-117061 piR-109721 piR-126818  
piR-113597 piR-109248 piR-12680  
piR-4449 piR-105454 piR-126716  
piR-25817 piR-8414 piR-126552  
piR-25715 piR-4650 piR-125972  
piR-122753 piR-136494 piR-125736  
piR-121208 piR-136341 piR-125679  
piR-111405 piR-136301 piR-125551  
piR-105378 piR-132003 piR-125395  
piR-24009 piR-129501 piR-124427  
piR-14851 piR-125912 piR-124358  
piR-138637 piR-120270 piR-12417  
piR-8369 piR-118029 piR-123812  
piR-24492 piR-116861 piR-123512  
piR-17478 piR-114338 piR-1233  
piR-101367 piR-103300 piR-123256  
piR-21793 piR-102238 piR-123219  
piR-137220 piR-23708 piR-122900  
piR-127601 piR-14489 piR-122779  
piR-120989 piR-130606 piR-122292  
piR-107788 piR-124358 piR-121762  
piR-133511 piR-12400 piR-121698  
piR-117824 piR-121698 piR-121646  
piR-111786 piR-121313 piR-1216  
piR-29429 piR-120836 piR-120889  
piR-113618 piR-119541 piR-120596  
piR-109213 piR-111794 piR-120159  
piR-5886 piR-110284 piR-119626  
piR-141450 piR-107775 piR-119603  
piR-140082 piR-107594 piR-119504  
piR-101530 piR-107297 piR-119438  
piR-2987 piR-105456 piR-118475  
piR-19724 piR-101943 piR-118389  
piR-15931 piR-100657 piR-11835  
piR-9925 piR-253 piR-117456  
piR-27540 piR-21397 piR-117262  
piR-132172 piR-137115 piR-117208  
piR-12616 piR-137065 piR-116849  
piR-8147 piR-135933 piR-116198  
piR-138953 piR-129619 piR-116012

piR-109052 piR-128815 piR-1159  
piR-24486 piR-126314 piR-115575  
piR-21952 piR-125469 piR-115253  
piR-134009 piR-125449 piR-115172  
piR-113535 piR-122344 piR-11492  
piR-107204 piR-121389 piR-114399  
piR-15334 piR-121136 piR-113721  
piR-128761 piR-117374 piR-113405  
piR-115250 piR-111745 piR-113224  
piR-101368 piR-110271 piR-113163  
piR-27925 piR-108951 piR-113104  
piR-19131 piR-100364 piR-11293  
piR-102695 piR-5926 piR-112265  
piR-101921 piR-3322 piR-112227  
piR-5799 piR-28590 piR-111288  
piR-113290 piR-25486 piR-110393  
piR-129940 piR-24238 piR-110314  
piR-136793 piR-20801 piR-109647  
piR-12851 piR-13328 piR-109310  
piR-118893 piR-131149 piR-10918  
piR-6824 piR-129247 piR-108923  
piR-130391 piR-127698 piR-10879  
piR-122539 piR-120140 piR-108479  
piR-3752 piR-118578 piR-10841  
piR-29948 piR-117223 piR-10808  
piR-120556 piR-117203 piR-107836  
piR-128976 piR-116810 piR-107612  
piR-27259 piR-8357 piR-107539  
piR-136713 piR-18685 piR-107477  
piR-117510 piR-17431 piR-107301  
piR-5036 piR-140138 piR-107240  
piR-24966 piR-139364 piR-107202  
piR-102594 piR-137200 piR-107082  
piR-29840 piR-135560 piR-106579  
piR-2491 piR-134271 piR-106219  
piR-125787 piR-128670 piR-106136  
piR-111971 piR-126660 piR-105698  
piR-22018 piR-121386 piR-105662  
piR-15649 piR-120439 piR-105618  
piR-125532 piR-118127 piR-105214  
piR-101130 piR-101750 piR-104964  
piR-13425 piR-101245 piR-104775  
piR-128056 piR-100453 piR-104752  
piR-116412 piR-5901 piR-104548  
piR-114955 piR-4743 piR-104504  
piR-111923 piR-3000 piR-104387  
piR-4858 piR-20086 piR-103685  
piR-11050 piR-119633 piR-103606  
piR-129954 piR-116497 piR-103026  
piR-113221 piR-115415 piR-102770  
piR-123368 piR-113462 piR-102497  
piR-28670 piR-102050 piR-1019  
piR-121991 piR-3929 piR-101352  
piR-104687 piR-29430 piR-101218

piR-113544 piR-27761 piR-100918  
piR-136116 piR-25226 piR-100503  
piR-112358 piR-141795 piR-100421  
piR-101136 piR-141435 piR-100233  
piR-5359 piR-137859 piR-100102  
piR-15397 piR-137122 piR-9400  
piR-114330 piR-136567 piR-922  
piR-105296 piR-133088 piR-9136  
piR-102835 piR-1283 piR-865  
piR-4727 piR-127824 piR-8522  
piR-19664 piR-126466 piR-8507  
piR-116418 piR-124700 piR-8304  
piR-14512 piR-115089 piR-8194  
piR-112171 piR-108976 piR-8026  
piR-3552 piR-101743 piR-7866  
piR-104540 piR-100058 piR-78  
piR-101102 piR-8168 piR-746  
piR-5311 piR-6168 piR-7347  
piR-105235 piR-5960 piR-65  
piR-135469 piR-5806 piR-6028  
piR-134833 piR-3251 piR-5990  
piR-132328 piR-137927 piR-5310  
piR-7224 piR-130584 piR-4931  
piR-6767 piR-128598 piR-4888  
piR-111469 piR-122982 piR-4541  
piR-3360 piR-119686 piR-4517  
piR-122336 piR-112715 piR-4075  
piR-109773 piR-112045 piR-3944  
piR-26044 piR-103346 piR-3398  
piR-25205 piR-101724 piR-3193  
piR-17396 piR-6432 piR-29755  
piR-133683 piR-28695 piR-29159  
piR-133156 piR-2554 piR-28522  
piR-9499 piR-2545 piR-28489  
piR-14462 piR-139388 piR-28263  
piR-137024 piR-138600 piR-28157  
piR-11022 piR-138259 piR-28034  
piR-139817 piR-137390 piR-2791  
piR-121394 piR-136926 piR-27252  
piR-121053 piR-131686 piR-27250  
piR-111298 piR-130224 piR-26939  
piR-28928 piR-124694 piR-25660  
piR-19665 piR-119742 piR-25625  
piR-128659 piR-115356 piR-25205  
piR-15620 piR-112119 piR-25156  
piR-13291 piR-111142 piR-24994  
piR-129697 piR-108572 piR-23948  
piR-123668 piR-103253 piR-23806  
piR-5258 piR-102824 piR-23369  
piR-26380 piR-102711 piR-22552  
piR-15102 piR-4820 piR-22542  
piR-139672 piR-25310 piR-22217  
piR-2275 piR-23092 piR-21616  
piR-14235 piR-18789 piR-21513

piR-114681 piR-136154 piR-21496  
piR-103509 piR-134149 piR-2103  
piR-103105 piR-128913 piR-20872  
piR-104956 piR-122605 piR-20699  
piR-130276 piR-120829 piR-20574  
piR-11365 piR-107082 piR-20502  
piR-8333 piR-104361 piR-20330  
piR-3257 piR-104103 piR-20267  
piR-27277 piR-102670 piR-20186  
piR-22911 piR-7084 piR-20184  
piR-137417 piR-6821 piR-19770  
piR-133488 piR-28945 piR-19479  
piR-126422 piR-20008 piR-19177  
piR-118642 piR-17240 piR-18912  
piR-107244 piR-141404 piR-18268  
piR-15755 piR-120917 piR-18256  
piR-14427 piR-120394 piR-18192  
piR-120083 piR-116871 piR-17945  
piR-116369 piR-110490 piR-17545  
piR-5984 piR-104848 piR-17309  
piR-5874 piR-104544 piR-1727  
piR-18002 piR-101489 piR-16882  
piR-126584 piR-101018 piR-15907  
piR-116127 piR-100973 piR-15883  
piR-113898 piR-4482 piR-15394  
piR-21442 piR-20007 piR-14607  
piR-140666 piR-19898 piR-145  
piR-123684 piR-140713 piR-14374  
piR-126739 piR-135660 piR-142522  
piR-7931 piR-13470 piR-142331  
piR-139954 piR-133699 piR-142147  
piR-133128 piR-133305 piR-141058  
piR-128324 piR-130953 piR-141015  
piR-109641 piR-129113 piR-140624  
piR-28723 piR-128092 piR-140597  
piR-105627 piR-125316 piR-140483  
piR-19624 piR-121001 piR-14044  
piR-132069 piR-120927 piR-140296  
piR-8512 piR-119680 piR-140184  
piR-28058 piR-117907 piR-140027  
piR-128746 piR-117520 piR-140003  
piR-128269 piR-103688 piR-139467  
piR-124601 piR-102675 piR-139325  
piR-110736 piR-102477 piR-139094  
piR-133341 piR-102082 piR-139075  
piR-124825 piR-4465 piR-138355  
piR-17916 piR-219 piR-138316  
piR-135163 piR-17090 piR-13827  
piR-128904 piR-140320 piR-13803  
piR-117343 piR-140246 piR-137324  
piR-125891 piR-127204 piR-137323  
piR-7565 piR-123111 piR-137240  
piR-6224 piR-116347 piR-136961  
piR-130496 piR-116002 piR-136829

piR-124605 piR-112538 piR-136703  
piR-117831 piR-101068 piR-136675  
piR-26077 piR-2886 piR-136503  
piR-6035 piR-141229 piR-136502  
piR-27949 piR-139372 piR-136313  
piR-136059 piR-138725 piR-136300  
piR-126956 piR-138704 piR-136128  
piR-1047 piR-135239 piR-135691  
piR-20709 piR-133944 piR-135512  
piR-142103 piR-130083 piR-134919  
piR-110067 piR-128794 piR-134460  
piR-3563 piR-104030 piR-134290  
piR-29879 piR-5742 piR-134123  
piR-29761 piR-5217 piR-134082  
piR-24566 piR-24486 piR-133682  
piR-125259 piR-20967 piR-133643  
piR-100275 piR-18184 piR-133520  
piR-15440 piR-140510 piR-133289  
piR-110451 piR-132979 piR-133219  
piR-110448 piR-129760 piR-133085  
piR-9454 piR-123710 piR-133037  
piR-18228 piR-123283 piR-133005  
piR-1509 piR-117672 piR-132892  
piR-101922 piR-112858 piR-13262  
piR-122784 piR-109701 piR-131805  
piR-100449 piR-108740 piR-131252  
piR-12853 piR-106139 piR-13  
piR-343 piR-102876 piR-13106  
piR-2331 piR-7207 piR-130698  
piR-133258 piR-6864 piR-130689  
piR-126008 piR-17728 piR-130393  
piR-107911 piR-17345 piR-130202  
piR-101884 piR-133451 piR-130024  
piR-17870 piR-132627 piR-129773  
piR-131032 piR-131706 piR-129705  
piR-129145 piR-131488 piR-129681  
piR-122629 piR-130089 piR-129467  
piR-11359 piR-129147 piR-129304  
piR-112865 piR-128926 piR-129206  
piR-29236 piR-125764 piR-129080  
piR-120713 piR-125243 piR-128736  
piR-107005 piR-123783 piR-128669  
piR-137644 piR-120988 piR-128509  
piR-112450 piR-119689 piR-128305  
piR-111253 piR-118191 piR-128179  
piR-29867 piR-117589 piR-12784  
piR-118858 piR-114349 piR-127482  
piR-107518 piR-113171 piR-12715  
piR-7969 piR-109150 piR-127010  
piR-28299 piR-105997 piR-126957  
piR-17430 piR-103623 piR-12683  
piR-128483 piR-8689 piR-126634  
piR-125483 piR-17955 piR-126408  
piR-137505 piR-16670 piR-126092

piR-112155 piR-139682 piR-125977  
piR-2847 piR-137398 piR-125634  
piR-141865 piR-134622 piR-125586  
piR-7085 piR-131793 piR-125534  
piR-19716 piR-127114 piR-125442  
piR-13659 piR-126428 piR-125414  
piR-134630 piR-123060 piR-125103  
piR-108766 piR-122461 piR-125036  
piR-100939 piR-111102 piR-124864  
piR-18476 piR-107786 piR-124637  
piR-107742 piR-107664 piR-124569  
piR-133448 piR-104569 piR-124443  
piR-8957 piR-6951 piR-124273  
piR-140790 piR-656 piR-124184  
piR-131345 piR-28587 piR-123462  
piR-17394 piR-14582 piR-123282  
piR-138673 piR-137782 piR-122909  
piR-138241 piR-13262 piR-122657  
piR-110327 piR-12908 piR-122516  
piR-106396 piR-128705 piR-122460  
piR-130659 piR-121419 piR-122357  
piR-103670 piR-116704 piR-122260  
piR-6813 piR-115395 piR-122198  
piR-132969 piR-115337 piR-122149  
piR-112077 piR-114970 piR-121787  
piR-6309 piR-109993 piR-121678  
piR-124261 piR-109938 piR-12160  
piR-130723 piR-23701 piR-121450  
piR-12016 piR-16720 piR-121428  
piR-103925 piR-13746 piR-121381  
piR-7615 piR-137180 piR-12125  
piR-139205 piR-136723 piR-121085  
piR-139025 piR-135141 piR-121022  
piR-124516 piR-133615 piR-120579  
piR-114315 piR-130734 piR-120546  
piR-105155 piR-124039 piR-12050  
piR-14437 piR-123873 piR-120168  
piR-142599 piR-121658 piR-12014  
piR-134557 piR-120045 piR-119893  
piR-132186 piR-119765 piR-119880  
piR-29991 piR-119662 piR-119749  
piR-123362 piR-119024 piR-119300  
piR-28753 piR-111659 piR-11926  
piR-27351 piR-110288 piR-118382  
piR-110571 piR-109617 piR-11813  
piR-100016 piR-106183 piR-117832  
piR-27467 piR-103191 piR-11780  
piR-120616 piR-6963 piR-117598  
piR-28919 piR-20398 piR-11725  
piR-126271 piR-138817 piR-11724  
piR-108468 piR-138147 piR-117234  
piR-2498 piR-137408 piR-117161  
piR-139853 piR-133279 piR-117131  
piR-125822 piR-13290 piR-116917



piR-105976 piR-131660 piR-116867  
piR-9928 piR-121024 piR-11634  
piR-2037 piR-118976 piR-11598  
piR-16984 piR-114796 piR-115879  
piR-122995 piR-114439 piR-115850  
piR-124136 piR-113900 piR-115718  
piR-101031 piR-113289 piR-115517  
piR-27314 piR-111368 piR-115452  
piR-127681 piR-110779 piR-11480  
piR-107821 piR-105655 piR-114657  
piR-12313 piR-102856 piR-114413  
piR-120517 piR-2694 piR-11399  
piR-106629 piR-22633 piR-113759  
piR-10038 piR-139836 piR-113293  
piR-18085 piR-126242 piR-113233  
piR-137252 piR-124276 piR-113213  
piR-105900 piR-118054 piR-112860  
piR-139794 piR-116510 piR-112547  
piR-8030 piR-116119 piR-111925  
piR-139341 piR-115345 piR-111584  
piR-134767 piR-112928 piR-111028  
piR-12976 piR-108260 piR-110891  
piR-111822 piR-61 piR-110710  
piR-19873 piR-2817 piR-110560  
piR-132109 piR-17164 piR-110484  
piR-121833 piR-14088 piR-110342  
piR-118949 piR-140743 piR-110290  
piR-112922 piR-135446 piR-109932  
piR-20085 piR-133427 piR-109399  
piR-115356 piR-128550 piR-109260  
piR-101053 piR-124663 piR-109053  
piR-125006 piR-124304 piR-108863  
piR-116894 piR-119582 piR-108807  
piR-110510 piR-118281 piR-108513  
piR-8180 piR-111818 piR-108510  
piR-29244 piR-107720 piR-108226  
piR-124376 piR-104464 piR-108123  
piR-122842 piR-102225 piR-108059  
piR-101404 piR-102012 piR-107929  
piR-9398 piR-101114 piR-107726  
piR-211 piR-100339 piR-10722  
piR-114867 piR-24724 piR-107130  
piR-7803 piR-138160 piR-106773  
piR-5217 piR-131256 piR-106752  
piR-2555 piR-130023 piR-106148  
piR-127576 piR-129064 piR-106006  
piR-124235 piR-126950 piR-105925  
piR-113756 piR-121057 piR-105340  
piR-106569 piR-119420 piR-105194  
piR-141028 piR-110880 piR-105081  
piR-135383 piR-110369 piR-104766  
piR-104173 piR-110009 piR-104488  
piR-7397 piR-109829 piR-10446  
piR-4773 piR-107901 piR-104197

|            |            |            |
|------------|------------|------------|
| piR-2388   | piR-106207 | piR-103617 |
| piR-131024 | piR-7546   | piR-103552 |
| piR-106938 | piR-24837  | piR-103539 |
| piR-16174  | piR-19581  | piR-103366 |
| piR-137904 | piR-131417 | piR-103272 |
| piR-122232 | piR-131075 | piR-103119 |
| piR-8220   | piR-125763 | piR-102892 |
| piR-4077   | piR-118037 | piR-102793 |
| piR-116465 | piR-116941 | piR-102216 |
| piR-125212 | piR-115549 | piR-101901 |
| piR-116922 | piR-108990 | piR-100526 |
| piR-110628 | piR-104407 | piR-100474 |
| piR-126660 | piR-102261 | piR-100001 |
| piR-2761   | piR-100655 | piR-9220   |
| piR-118658 | piR-9437   | piR-8894   |
| piR-101415 | piR-8814   | piR-8610   |
| piR-26633  | piR-6330   | piR-8531   |
| piR-119594 | piR-3009   | piR-786    |
| piR-113915 | piR-21485  | piR-7374   |
| piR-131610 | piR-134940 | piR-708    |
| piR-11702  | piR-128997 | piR-679    |
| piR-104413 | piR-12609  | piR-6699   |
| piR-5446   | piR-123442 | piR-647    |
| piR-140011 | piR-118328 | piR-6364   |
| piR-126053 | piR-105854 | piR-6242   |
| piR-6220   | piR-103943 | piR-6025   |
| piR-24693  | piR-9004   | piR-585    |
| piR-142086 | piR-6323   | piR-5701   |
| piR-130269 | piR-21291  | piR-5571   |
| piR-105930 | piR-17848  | piR-5081   |
| piR-20061  | piR-14891  | piR-465    |
| piR-136668 | piR-140350 | piR-4419   |
| piR-113421 | piR-133924 | piR-42     |
| piR-110237 | piR-132757 | piR-3883   |
| piR-28963  | piR-131520 | piR-3730   |
| piR-138168 | piR-125370 | piR-3569   |
| piR-122831 | piR-12440  | piR-29988  |
| piR-111658 | piR-115204 | piR-29956  |
| piR-107846 | piR-114551 | piR-29627  |
| piR-119826 | piR-109657 | piR-29523  |
| piR-119172 | piR-7357   | piR-29054  |
| piR-100422 | piR-7112   | piR-28999  |
| piR-3893   | piR-5879   | piR-28842  |
| piR-128946 | piR-3255   | piR-28211  |
| piR-120081 | piR-18033  | piR-28182  |
| piR-119563 | piR-14404  | piR-28102  |
| piR-116821 | piR-141926 | piR-28067  |
| piR-8630   | piR-141879 | piR-27945  |
| piR-7962   | piR-141132 | piR-2787   |
| piR-134428 | piR-137318 | piR-27457  |
| piR-127664 | piR-136258 | piR-26870  |
| piR-106922 | piR-135710 | piR-26707  |
| piR-6036   | piR-133806 | piR-26445  |
| piR-122937 | piR-13236  | piR-26189  |

|            |            |            |
|------------|------------|------------|
| piR-8600   | piR-132166 | piR-26052  |
| piR-15753  | piR-125532 | piR-2596   |
| piR-135873 | piR-122298 | piR-25689  |
| piR-120432 | piR-121981 | piR-25487  |
| piR-105832 | piR-118928 | piR-24828  |
| piR-29909  | piR-117446 | piR-24718  |
| piR-29202  | piR-116191 | piR-23345  |
| piR-114910 | piR-104677 | piR-23243  |
| piR-105407 | piR-29185  | piR-23053  |
| piR-6618   | piR-14103  | piR-23014  |
| piR-130936 | piR-138370 | piR-22808  |
| piR-105642 | piR-138120 | piR-22375  |
| piR-4437   | piR-133590 | piR-22312  |
| piR-142129 | piR-129822 | piR-2199   |
| piR-129328 | piR-126304 | piR-21911  |
| piR-123208 | piR-118408 | piR-21170  |
| piR-119223 | piR-117409 | piR-20452  |
| piR-103207 | piR-117326 | piR-19829  |
| piR-3972   | piR-117251 | piR-19280  |
| piR-24839  | piR-115803 | piR-18645  |
| piR-9231   | piR-11324  | piR-18615  |
| piR-114047 | piR-110961 | piR-18580  |
| piR-7570   | piR-108322 | piR-18346  |
| piR-5454   | piR-101578 | piR-18245  |
| piR-25903  | piR-101099 | piR-18155  |
| piR-14583  | piR-100501 | piR-1815   |
| piR-138189 | piR-18372  | piR-17967  |
| piR-116019 | piR-138318 | piR-17966  |
| piR-110181 | piR-134769 | piR-17641  |
| piR-104416 | piR-13276  | piR-1744   |
| piR-135433 | piR-129499 | piR-17422  |
| piR-12359  | piR-126947 | piR-17320  |
| piR-122333 | piR-126632 | piR-16927  |
| piR-120651 | piR-123539 | piR-16569  |
| piR-118126 | piR-119160 | piR-16549  |
| piR-133336 | piR-111840 | piR-1621   |
| piR-127128 | piR-111655 | piR-16003  |
| piR-122068 | piR-106664 | piR-15902  |
| piR-113096 | piR-106331 | piR-15796  |
| piR-3288   | piR-4279   | piR-15410  |
| piR-108250 | piR-21416  | piR-15211  |
| piR-127893 | piR-142155 | piR-14962  |
| piR-127700 | piR-134883 | piR-14932  |
| piR-124774 | piR-127599 | piR-14473  |
| piR-11566  | piR-109817 | piR-142686 |
| piR-253    | piR-7039   | piR-142624 |
| piR-142049 | piR-4814   | piR-142494 |
| piR-130179 | piR-22949  | piR-142140 |
| piR-115334 | piR-2109   | piR-142111 |
| piR-102985 | piR-142223 | piR-141839 |
| piR-29252  | piR-139516 | piR-141827 |
| piR-26154  | piR-136331 | piR-141796 |
| piR-1993   | piR-134353 | piR-141691 |
| piR-131440 | piR-132398 | piR-141434 |

piR-122619 piR-131069 piR-141212  
piR-100184 piR-128010 piR-141120  
piR-117972 piR-119411 piR-140907  
piR-100636 piR-119281 piR-140573  
piR-100180 piR-119076 piR-140571  
piR-20451 piR-109072 piR-140485  
piR-137218 piR-5799 piR-140374  
piR-125755 piR-29107 piR-140208  
piR-118429 piR-26956 piR-140173  
piR-117505 piR-2269 piR-1401  
piR-114122 piR-15213 piR-140068  
piR-11106 piR-14700 piR-13991  
piR-101391 piR-141347 piR-139628  
piR-7787 piR-140842 piR-139530  
piR-140407 piR-137085 piR-139497  
piR-134417 piR-127922 piR-139411  
piR-131653 piR-127729 piR-139327  
piR-119439 piR-120912 piR-139134  
piR-104983 piR-119074 piR-139114  
piR-5160 piR-118065 piR-138708  
piR-22164 piR-117733 piR-138648  
piR-141806 piR-113310 piR-138353  
piR-130991 piR-109512 piR-138340  
piR-12912 piR-102593 piR-138175  
piR-125348 piR-101354 piR-13800  
piR-119435 piR-4259 piR-137657  
piR-116417 piR-23777 piR-137626  
piR-110308 piR-21452 piR-137539  
piR-141136 piR-140692 piR-137325  
piR-138546 piR-138486 piR-136990  
piR-124690 piR-136666 piR-136920  
piR-124614 piR-136469 piR-136316  
piR-107236 piR-131839 piR-136030  
piR-135654 piR-129975 piR-135915  
piR-134275 piR-129396 piR-135393  
piR-126638 piR-122057 piR-135140  
piR-11768 piR-120267 piR-134707  
piR-8123 piR-118392 piR-134427  
piR-17365 piR-102537 piR-134326  
piR-137471 piR-19052 piR-134234  
piR-130456 piR-140953 piR-133869  
piR-108621 piR-136083 piR-133706  
piR-108055 piR-135842 piR-133371  
piR-100131 piR-133847 piR-133285  
piR-2600 piR-132475 piR-133075  
piR-140488 piR-132186 piR-132955  
piR-106715 piR-128848 piR-132673  
piR-122959 piR-120793 piR-132639  
piR-121529 piR-110618 piR-132358  
piR-111990 piR-110553 piR-132337  
piR-111208 piR-109636 piR-132215  
piR-5859 piR-109027 piR-1321  
piR-29134 piR-107597 piR-132091  
piR-2141 piR-104847 piR-132060

|            |            |            |
|------------|------------|------------|
| piR-14122  | piR-103410 | piR-131948 |
| piR-124209 | piR-101964 | piR-131904 |
| piR-17825  | piR-4116   | piR-131821 |
| piR-16944  | piR-3271   | piR-131509 |
| piR-130277 | piR-142658 | piR-131261 |
| piR-108976 | piR-141826 | piR-130766 |
| piR-29752  | piR-136804 | piR-130277 |
| piR-19913  | piR-135998 | piR-130035 |
| piR-14839  | piR-130952 | piR-130003 |
| piR-123459 | piR-124326 | piR-129881 |
| piR-113194 | piR-123219 | piR-129683 |
| piR-8130   | piR-119721 | piR-129492 |
| piR-28759  | piR-116737 | piR-129320 |
| piR-126738 | piR-112811 | piR-128810 |
| piR-123113 | piR-112386 | piR-128631 |
| piR-111925 | piR-103931 | piR-128586 |
| piR-100923 | piR-102914 | piR-128289 |
| piR-8799   | piR-29382  | piR-128270 |
| piR-2505   | piR-27746  | piR-128208 |
| piR-22577  | piR-16798  | piR-128206 |
| piR-12257  | piR-15955  | piR-127832 |
| piR-108493 | piR-15921  | piR-127630 |
| piR-106550 | piR-134640 | piR-1275   |
| piR-7596   | piR-134548 | piR-127448 |
| piR-142223 | piR-132118 | piR-127355 |
| piR-111400 | piR-13103  | piR-126520 |
| piR-106916 | piR-129789 | piR-126492 |
| piR-4912   | piR-128129 | piR-126288 |
| piR-15367  | piR-122915 | piR-126271 |
| piR-131178 | piR-122277 | piR-126122 |
| piR-104206 | piR-122065 | piR-126051 |
| piR-101281 | piR-108332 | piR-125913 |
| piR-6838   | piR-107816 | piR-125897 |
| piR-14833  | piR-107235 | piR-125852 |
| piR-121353 | piR-103622 | piR-12577  |
| piR-5013   | piR-101851 | piR-125633 |
| piR-137612 | piR-101754 | piR-125581 |
| piR-124260 | piR-100544 | piR-125391 |
| piR-12158  | piR-8448   | piR-124960 |
| piR-117066 | piR-5934   | piR-124956 |
| piR-102263 | piR-5747   | piR-124896 |
| piR-29172  | piR-23527  | piR-124523 |
| piR-28113  | piR-2156   | piR-124485 |
| piR-131139 | piR-15479  | piR-124383 |
| piR-139499 | piR-135818 | piR-124301 |
| piR-130435 | piR-130508 | piR-123985 |
| piR-122590 | piR-130264 | piR-123265 |
| piR-122366 | piR-123792 | piR-123086 |
| piR-111363 | piR-123323 | piR-123008 |
| piR-109921 | piR-120799 | piR-122884 |
| piR-108930 | piR-115594 | piR-122739 |
| piR-117834 | piR-108281 | piR-121996 |
| piR-115223 | piR-100732 | piR-121969 |
| piR-28457  | piR-5239   | piR-121908 |

|            |            |            |
|------------|------------|------------|
| piR-10492  | piR-4734   | piR-121782 |
| piR-6450   | piR-4127   | piR-121188 |
| piR-128645 | piR-16924  | piR-121153 |
| piR-590    | piR-141725 | piR-121115 |
| piR-4824   | piR-140484 | piR-120813 |
| piR-140803 | piR-131396 | piR-120760 |
| piR-139823 | piR-128875 | piR-120690 |
| piR-110490 | piR-120720 | piR-120523 |
| piR-133022 | piR-11759  | piR-120445 |
| piR-111546 | piR-112420 | piR-120003 |
| piR-6091   | piR-110372 | piR-119643 |
| piR-133052 | piR-108909 | piR-119058 |
| piR-7008   | piR-3995   | piR-117593 |
| piR-130620 | piR-303    | piR-117495 |
| piR-117977 | piR-21462  | piR-117464 |
| piR-111186 | piR-136854 | piR-117333 |
| piR-104739 | piR-135035 | piR-117091 |
| piR-25362  | piR-134817 | piR-117068 |
| piR-119934 | piR-129114 | piR-116749 |
| piR-113814 | piR-125637 | piR-116518 |
| piR-103847 | piR-123308 | piR-115852 |
| piR-133110 | piR-118721 | piR-115688 |
| piR-121223 | piR-114924 | piR-115656 |
| piR-101239 | piR-114529 | piR-115570 |
| piR-24663  | piR-107238 | piR-115519 |
| piR-134957 | piR-102953 | piR-115477 |
| piR-116014 | piR-101983 | piR-115179 |
| piR-110516 | piR-101293 | piR-115049 |
| piR-132609 | piR-5404   | piR-114855 |
| piR-128369 | piR-4102   | piR-114756 |
| piR-27623  | piR-28364  | piR-114755 |
| piR-25951  | piR-24247  | piR-114268 |
| piR-133895 | piR-2339   | piR-114213 |
| piR-133264 | piR-19961  | piR-113920 |
| piR-118455 | piR-15113  | piR-113005 |
| piR-118174 | piR-139053 | piR-112455 |
| piR-116013 | piR-134953 | piR-1122   |
| piR-9654   | piR-133316 | piR-111829 |
| piR-114778 | piR-132772 | piR-111629 |
| piR-110310 | piR-125406 | piR-111531 |
| piR-140032 | piR-120144 | piR-111239 |
| piR-135453 | piR-119523 | piR-111183 |
| piR-12575  | piR-117359 | piR-110986 |
| piR-101525 | piR-113498 | piR-110911 |
| piR-2893   | piR-109627 | piR-110582 |
| piR-129897 | piR-104725 | piR-110578 |
| piR-9409   | piR-100485 | piR-11048  |
| piR-651    | piR-19047  | piR-11003  |
| piR-4685   | piR-16838  | piR-109833 |
| piR-29721  | piR-139211 | piR-109704 |
| piR-137119 | piR-126715 | piR-10942  |
| piR-136911 | piR-123980 | piR-109169 |
| piR-13027  | piR-123441 | piR-109023 |
| piR-11280  | piR-116227 | piR-108683 |

piR-109933 piR-114843 piR-108611  
piR-19391 piR-114329 piR-10846  
piR-135959 piR-113556 piR-108385  
piR-127244 piR-112955 piR-10835  
piR-11325 piR-112851 piR-108194  
piR-6746 piR-110222 piR-108017  
piR-26124 piR-106217 piR-107764  
piR-111870 piR-104567 piR-107606  
piR-12512 piR-104535 piR-107547  
piR-110168 piR-103523 piR-107188  
piR-101131 piR-101530 piR-107172  
piR-6048 piR-101187 piR-106506  
piR-136185 piR-29059 piR-106390  
piR-130003 piR-28085 piR-106295  
piR-129936 piR-1557 piR-106070  
piR-128652 piR-141237 piR-105859  
piR-129809 piR-139285 piR-105830  
piR-115082 piR-136715 piR-10562  
piR-113025 piR-132519 piR-10528  
piR-117414 piR-131835 piR-105270  
piR-29913 piR-130956 piR-10517  
piR-2420 piR-119826 piR-104778  
piR-117711 piR-119561 piR-10469  
piR-8905 piR-118372 piR-104389  
piR-133200 piR-115981 piR-104211  
piR-4628 piR-110988 piR-10413  
piR-26572 piR-106809 piR-104087  
piR-121192 piR-105286 piR-103981  
piR-12047 piR-103915 piR-103896  
piR-3959 piR-465 piR-103844  
piR-127837 piR-24153 piR-103637  
piR-126895 piR-142634 piR-103603  
piR-1980 piR-14227 piR-103260  
piR-132284 piR-140027 piR-102786  
piR-124369 piR-133533 piR-102609  
piR-6293 piR-124697 piR-102547  
piR-2906 piR-121536 piR-102491  
piR-26514 piR-119439 piR-102475  
piR-15325 piR-117865 piR-102398  
piR-23946 piR-109858 piR-102123  
piR-141799 piR-109437 piR-101581  
piR-113848 piR-106187 piR-101529  
piR-110378 piR-105548 piR-101200  
piR-129567 piR-103102 piR-101146  
piR-107272 piR-103097 piR-100790  
piR-104624 piR-100217 piR-100374  
piR-5468 piR-29824 piR-100334  
piR-27775 piR-29551 piR-100027  
piR-135470 piR-20479 piR-9983  
piR-28571 piR-139443 piR-9334  
piR-24460 piR-132464 piR-9277  
piR-140153 piR-132250 piR-8983  
piR-1288 piR-129400 piR-8938  
piR-122448 piR-125699 piR-8906

|            |            |           |
|------------|------------|-----------|
| piR-7534   | piR-121431 | piR-8459  |
| piR-13604  | piR-120682 | piR-8279  |
| piR-135145 | piR-117304 | piR-8063  |
| piR-124910 | piR-116504 | piR-7981  |
| piR-122088 | piR-104510 | piR-7916  |
| piR-11630  | piR-137747 | piR-7492  |
| piR-101613 | piR-131678 | piR-7406  |
| piR-7411   | piR-13150  | piR-74    |
| piR-136469 | piR-127964 | piR-7325  |
| piR-131926 | piR-118557 | piR-7309  |
| piR-1626   | piR-118349 | piR-7056  |
| piR-141954 | piR-117925 | piR-6942  |
| piR-10040  | piR-117725 | piR-5679  |
| piR-8382   | piR-116143 | piR-5577  |
| piR-5677   | piR-107893 | piR-5412  |
| piR-4797   | piR-101067 | piR-5372  |
| piR-130217 | piR-823    | piR-5192  |
| piR-105334 | piR-23860  | piR-51    |
| piR-103049 | piR-1824   | piR-5098  |
| piR-136550 | piR-139996 | piR-4864  |
| piR-129942 | piR-138441 | piR-473   |
| piR-116138 | piR-136697 | piR-4437  |
| piR-13414  | piR-134448 | piR-433   |
| piR-123644 | piR-133844 | piR-4061  |
| piR-117446 | piR-125483 | piR-3601  |
| piR-108821 | piR-124925 | piR-3203  |
| piR-100437 | piR-120363 | piR-30016 |
| piR-8671   | piR-115748 | piR-29852 |
| piR-3837   | piR-109987 | piR-29699 |
| piR-125280 | piR-106349 | piR-29539 |
| piR-104689 | piR-5505   | piR-29288 |
| piR-101522 | piR-4451   | piR-29216 |
| piR-141475 | piR-137884 | piR-29174 |
| piR-128079 | piR-135371 | piR-2905  |
| piR-2446   | piR-133913 | piR-29052 |
| piR-132571 | piR-127919 | piR-28611 |
| piR-123894 | piR-119012 | piR-28603 |
| piR-109712 | piR-113078 | piR-28523 |
| piR-107193 | piR-112979 | piR-28473 |
| piR-4081   | piR-9516   | piR-28235 |
| piR-28726  | piR-6404   | piR-28221 |
| piR-142337 | piR-25524  | piR-28207 |
| piR-138293 | piR-15217  | piR-2817  |
| piR-125338 | piR-14005  | piR-28099 |
| piR-110563 | piR-139339 | piR-27819 |
| piR-3297   | piR-136630 | piR-27349 |
| piR-136839 | piR-134072 | piR-26114 |
| piR-132850 | piR-128200 | piR-26077 |
| piR-126384 | piR-126709 | piR-25976 |
| piR-5879   | piR-125887 | piR-25722 |
| piR-3651   | piR-121973 | piR-25255 |
| piR-137845 | piR-120509 | piR-25005 |
| piR-18572  | piR-119999 | piR-24949 |
| piR-132376 | piR-118092 | piR-24861 |



piR-126040 piR-117644 piR-24304  
piR-104979 piR-116696 piR-24270  
piR-5007 piR-102756 piR-2409  
piR-15352 piR-6243 piR-23820  
piR-112718 piR-2855 piR-23801  
piR-109496 piR-20572 piR-23498  
piR-100771 piR-20346 piR-23137  
piR-132716 piR-14851 piR-23121  
piR-115797 piR-138026 piR-22907  
piR-7853 piR-137820 piR-22885  
piR-102448 piR-137395 piR-2245  
piR-139996 piR-133957 piR-22441  
piR-127461 piR-127796 piR-22379  
piR-114740 piR-126730 piR-22320  
piR-19891 piR-124390 piR-22002  
piR-15220 piR-123886 piR-21922  
piR-141838 piR-122226 piR-21713  
piR-141435 piR-113237 piR-21573  
piR-127253 piR-107587 piR-21224  
piR-100084 piR-104912 piR-21012  
piR-1588 piR-103318 piR-20913  
piR-139941 piR-102441 piR-20342  
piR-129542 piR-23751 piR-19703  
piR-115568 piR-15434 piR-19445  
piR-113179 piR-15281 piR-19373  
piR-104228 piR-141665 piR-19235  
piR-28185 piR-139204 piR-19150  
piR-28040 piR-136711 piR-19091  
piR-16235 piR-135867 piR-18700  
piR-128713 piR-135280 piR-18690  
piR-102438 piR-134687 piR-18505  
piR-16814 piR-134039 piR-1801  
piR-136046 piR-133189 piR-17871  
piR-100047 piR-128477 piR-17529  
piR-115570 piR-127505 piR-17403  
piR-8688 piR-125908 piR-17324  
piR-21027 piR-121679 piR-16929  
piR-106511 piR-121400 piR-16798  
piR-106242 piR-119975 piR-16759  
piR-126543 piR-117990 piR-1640  
piR-110396 piR-117611 piR-16368  
piR-15142 piR-113411 piR-15732  
piR-14585 piR-113357 piR-15463  
piR-12502 piR-112511 piR-15262  
piR-109237 piR-112166 piR-15209  
piR-9559 piR-110429 piR-14918  
piR-129002 piR-108696 piR-14833  
piR-124756 piR-102821 piR-142696  
piR-120853 piR-101279 piR-142499  
piR-3431 piR-6572 piR-142093  
piR-17364 piR-28584 piR-142074  
piR-137098 piR-17319 piR-141985  
piR-115193 piR-15916 piR-141854  
piR-111545 piR-142359 piR-141719

piR-105747 piR-142061 piR-141460  
piR-102178 piR-141957 piR-14121  
piR-9225 piR-137970 piR-141088  
piR-124784 piR-133376 piR-140975  
piR-102916 piR-13123 piR-140820  
piR-100214 piR-129569 piR-140636  
piR-29178 piR-128348 piR-140586  
piR-14280 piR-128173 piR-140416  
piR-134794 piR-123654 piR-140366  
piR-119898 piR-121928 piR-139669  
piR-106666 piR-121452 piR-139552  
piR-141895 piR-121350 piR-13955  
piR-139806 piR-11923 piR-139398  
piR-13140 piR-119079 piR-139308  
piR-108035 piR-117048 piR-139299  
piR-100523 piR-114239 piR-139189  
piR-21772 piR-113840 piR-138802  
piR-17638 piR-109767 piR-138722  
piR-119070 piR-105119 piR-138520  
piR-115475 piR-102806 piR-138428  
piR-100311 piR-101300 piR-138297  
piR-29922 piR-101280 piR-138071  
piR-23994 piR-8690 piR-138003  
piR-135339 piR-20240 piR-137536  
piR-104081 piR-18547 piR-137499  
piR-102443 piR-142288 piR-137312  
piR-4412 piR-141856 piR-13708  
piR-24947 piR-139664 piR-136749  
piR-142075 piR-134720 piR-136336  
piR-135889 piR-130963 piR-136328  
piR-130894 piR-127779 piR-136304  
piR-24662 piR-126907 piR-136284  
piR-15602 piR-125543 piR-136234  
piR-132606 piR-124624 piR-136161  
piR-131757 piR-119576 piR-136144  
piR-118203 piR-113296 piR-136100  
piR-4447 piR-112253 piR-136097  
piR-130594 piR-111005 piR-136015  
piR-111564 piR-110085 piR-135982  
piR-108171 piR-106354 piR-135939  
piR-100339 piR-106301 piR-135817  
piR-9296 piR-103324 piR-135631  
piR-2965 piR-101317 piR-135591  
piR-138747 piR-6373 piR-135394  
piR-4439 piR-3839 piR-1351  
piR-28330 piR-2798 piR-134852  
piR-24364 piR-142262 piR-134635  
piR-141495 piR-140577 piR-134562  
piR-127470 piR-138953 piR-134282  
piR-108834 piR-137989 piR-134166  
piR-3141 piR-136738 piR-134150  
piR-29754 piR-132586 piR-133692  
piR-135779 piR-13152 piR-133601  
piR-111320 piR-127064 piR-133509

piR-138874 piR-123635 piR-133451  
piR-126870 piR-121499 piR-133333  
piR-119329 piR-120899 piR-132810  
piR-113905 piR-117600 piR-132748  
piR-113150 piR-112875 piR-132568  
piR-107238 piR-110932 piR-132431  
piR-19803 piR-110015 piR-132353  
piR-19477 piR-107321 piR-132171  
piR-130842 piR-107084 piR-13201  
piR-7772 piR-104564 piR-131861  
piR-16 piR-103495 piR-131255  
piR-131929 piR-101992 piR-130962  
piR-122483 piR-29553 piR-13090  
piR-121614 piR-26475 piR-130771  
piR-120752 piR-16973 piR-130736  
piR-115815 piR-137836 piR-130654  
piR-6659 piR-136116 piR-130310  
piR-133382 piR-135753 piR-130127  
piR-131965 piR-131871 piR-130113  
piR-114239 piR-130697 piR-129654  
piR-21592 piR-128269 piR-129631  
piR-15282 piR-127306 piR-129445  
piR-135259 piR-124315 piR-129439  
piR-124068 piR-121626 piR-129322  
piR-113751 piR-119905 piR-129237  
piR-110696 piR-109586 piR-129158  
piR-28591 piR-105213 piR-129118  
piR-140598 piR-102647 piR-128844  
piR-133476 piR-6778 piR-128671  
piR-109664 piR-6049 piR-128646  
piR-109572 piR-4558 piR-128585  
piR-101358 piR-18785 piR-128511  
piR-6712 piR-16301 piR-128500  
piR-25284 piR-141025 piR-128426  
piR-11425 piR-13654 piR-128419  
piR-110489 piR-136463 piR-127992  
piR-109595 piR-135812 piR-127805  
piR-9515 piR-128606 piR-12777  
piR-25495 piR-128375 piR-127498  
piR-23682 piR-127211 piR-127358  
piR-138961 piR-120517 piR-127166  
piR-13470 piR-115809 piR-126977  
piR-108301 piR-114910 piR-126864  
piR-104549 piR-111521 piR-126850  
piR-25185 piR-108014 piR-126381  
piR-130290 piR-105710 piR-126349  
piR-3301 piR-105642 piR-126251  
piR-141206 piR-100149 piR-126236  
piR-135284 piR-18537 piR-126201  
piR-118481 piR-16271 piR-126117  
piR-112444 piR-15324 piR-126089  
piR-3921 piR-139094 piR-12591  
piR-27792 piR-135895 piR-125903  
piR-121296 piR-126655 piR-125901

piR-119312 piR-125383 piR-125858  
piR-115266 piR-124101 piR-125746  
piR-28492 piR-124099 piR-125665  
piR-131200 piR-11842 piR-125381  
piR-104627 piR-118096 piR-124918  
piR-136020 piR-115467 piR-124904  
piR-134776 piR-112107 piR-124779  
piR-6352 piR-110251 piR-124168  
piR-110576 piR-109977 piR-123543  
piR-17831 piR-109563 piR-123398  
piR-141957 piR-109293 piR-123260  
piR-8081 piR-108932 piR-12324  
piR-4862 piR-10663 piR-123173  
piR-137714 piR-106348 piR-123126  
piR-119737 piR-105158 piR-122803  
piR-4222 piR-102767 piR-122699  
piR-29243 piR-8243 piR-122231  
piR-123251 piR-5272 piR-121957  
piR-133747 piR-5184 piR-121324  
piR-117371 piR-29545 piR-1213  
piR-109588 piR-24594 piR-121305  
piR-129234 piR-24313 piR-121277  
piR-122783 piR-19810 piR-121124  
piR-109592 piR-15714 piR-121056  
piR-106041 piR-15407 piR-120021  
piR-886 piR-14701 piR-119970  
piR-128307 piR-142325 piR-119787  
piR-120549 piR-141186 piR-119705  
piR-116460 piR-138186 piR-119695  
piR-102299 piR-136543 piR-118953  
piR-126587 piR-133972 piR-11895  
piR-104542 piR-131845 piR-118908  
piR-29076 piR-131219 piR-118815  
piR-28003 piR-131218 piR-118317  
piR-129902 piR-130351 piR-11795  
piR-124320 piR-128074 piR-117839  
piR-111749 piR-124447 piR-117749  
piR-20783 piR-123770 piR-117709  
piR-126693 piR-120650 piR-117698  
piR-12422 piR-116838 piR-117675  
piR-138724 piR-115485 piR-117574  
piR-135784 piR-108971 piR-117437  
piR-1249 piR-108363 piR-117306  
piR-113246 piR-105765 piR-11729  
piR-1239 piR-102134 piR-11719  
piR-123175 piR-882 piR-117149  
piR-139244 piR-8343 piR-116999  
piR-137058 piR-4179 piR-116615  
piR-134439 piR-17506 piR-116440  
piR-11476 piR-138961 piR-116391  
piR-111026 piR-138599 piR-116352  
piR-3019 piR-13414 piR-116133  
piR-20629 piR-133796 piR-116075  
piR-139278 piR-131238 piR-116043

piR-116161 piR-12480 piR-115924  
piR-102828 piR-111000 piR-11501  
piR-102219 piR-107342 piR-114849  
piR-29620 piR-107144 piR-114813  
piR-27799 piR-107034 piR-114540  
piR-24619 piR-105645 piR-114247  
piR-21662 piR-100666 piR-114169  
piR-28283 piR-100616 piR-113979  
piR-141209 piR-5916 piR-113978  
piR-108596 piR-135811 piR-113815  
piR-101392 piR-133171 piR-113467  
piR-20884 piR-131098 piR-112817  
piR-131975 piR-128486 piR-112683  
piR-116162 piR-125392 piR-112445  
piR-105587 piR-114573 piR-112391  
piR-128517 piR-111405 piR-112264  
piR-121475 piR-109104 piR-112135  
piR-118435 piR-108773 piR-112052  
piR-107555 piR-105646 piR-111818  
piR-106065 piR-104572 piR-111701  
piR-9572 piR-101470 piR-111608  
piR-5748 piR-100773 piR-111367  
piR-1247 piR-28389 piR-111075  
piR-106733 piR-22636 piR-111059  
piR-101511 piR-140734 piR-110848  
piR-135803 piR-1380 piR-110715  
piR-125214 piR-131944 piR-110466  
piR-6366 piR-130448 piR-11036  
piR-138838 piR-13004 piR-110225  
piR-138521 piR-129277 piR-110111  
piR-134923 piR-126086 piR-109910  
piR-134710 piR-120222 piR-109783  
piR-131701 piR-116714 piR-109720  
piR-127758 piR-114098 piR-109701  
piR-118292 piR-114049 piR-109648  
piR-134296 piR-108668 piR-109439  
piR-121860 piR-105365 piR-109422  
piR-113714 piR-3278 piR-109346  
piR-109631 piR-2230 piR-109194  
piR-127761 piR-17616 piR-109140  
piR-121893 piR-15261 piR-109139  
piR-121088 piR-141967 piR-109079  
piR-118833 piR-141798 piR-108868  
piR-104868 piR-132247 piR-108756  
piR-100860 piR-1294 piR-108729  
piR-19709 piR-127853 piR-1086  
piR-129656 piR-127684 piR-108427  
piR-117092 piR-125770 piR-108360  
piR-114617 piR-1247 piR-108306  
piR-110044 piR-1212 piR-107727  
piR-104756 piR-11639 piR-107704  
piR-28388 piR-114321 piR-107677  
piR-123658 piR-112590 piR-107669  
piR-104556 piR-1086 piR-107416

piR-103638 piR-10373 piR-106889  
piR-7429 piR-4121 piR-106474  
piR-29760 piR-14725 piR-106457  
piR-19797 piR-141706 piR-106329  
piR-112750 piR-140805 piR-106142  
piR-112574 piR-140622 piR-106092  
piR-107486 piR-137368 piR-106061  
piR-28566 piR-136209 piR-105927  
piR-18919 piR-131356 piR-105462  
piR-120059 piR-128243 piR-105303  
piR-118694 piR-126973 piR-105177  
piR-133465 piR-126200 piR-105159  
piR-103031 piR-126035 piR-105079  
piR-9209 piR-123420 piR-104708  
piR-6912 piR-123151 piR-10463  
piR-29758 piR-121768 piR-104593  
piR-136887 piR-120003 piR-10451  
piR-105663 piR-110244 piR-104441  
piR-139 piR-107628 piR-104371  
piR-137062 piR-107223 piR-10429  
piR-130053 piR-106641 piR-104180  
piR-122469 piR-106632 piR-103766  
piR-108696 piR-103714 piR-103575  
piR-108485 piR-103593 piR-103410  
piR-104361 piR-102460 piR-103403  
piR-2150 piR-101250 piR-103374  
piR-113969 piR-7948 piR-103248  
piR-113596 piR-3083 piR-103192  
piR-5365 piR-28608 piR-102814  
piR-26473 piR-24306 piR-102696  
piR-24608 piR-17860 piR-102529  
piR-116689 piR-17430 piR-102017  
piR-112349 piR-16677 piR-101510  
piR-8286 piR-133799 piR-101423  
piR-15164 piR-132909 piR-101401  
piR-122425 piR-127017 piR-101388  
piR-6930 piR-124452 piR-101286  
piR-5267 piR-118038 piR-101199  
piR-14662 piR-115605 piR-100877  
piR-117902 piR-110941 piR-100726  
piR-109556 piR-107253 piR-100620  
piR-107043 piR-105667 piR-10060  
piR-133281 piR-101334 piR-100444  
piR-132398 piR-2964 piR-100402  
piR-130997 piR-21122 piR-100192  
piR-107630 piR-19227 piR-9760  
piR-104665 piR-14772 piR-9694  
piR-13083 piR-13982 piR-8933  
piR-13546 piR-138833 piR-8678  
piR-119804 piR-131253 piR-8481  
piR-112545 piR-128133 piR-8163  
piR-103873 piR-125542 piR-8148  
piR-3539 piR-122312 piR-8080  
piR-29182 piR-121204 piR-764

piR-141231 piR-120957 piR-7477  
piR-138821 piR-118077 piR-7401  
piR-12574 piR-113013 piR-7321  
piR-27510 piR-111786 piR-7278  
piR-140381 piR-102426 piR-714  
piR-138998 piR-100841 piR-6916  
piR-108101 piR-140733 piR-6674  
piR-26606 piR-137116 piR-658  
piR-135995 piR-136906 piR-6144  
piR-125786 piR-136516 piR-6060  
piR-119916 piR-135538 piR-5662  
piR-111755 piR-135033 piR-5579  
piR-4023 piR-134256 piR-5536  
piR-138369 piR-129940 piR-517  
piR-141586 piR-129648 piR-5135  
piR-112148 piR-126581 piR-5048  
piR-104464 piR-121464 piR-4844  
piR-19972 piR-118306 piR-4627  
piR-115481 piR-117893 piR-4499  
piR-103061 piR-116659 piR-438  
piR-123707 piR-109336 piR-4240  
piR-122699 piR-105923 piR-4143  
piR-104270 piR-101603 piR-3934  
piR-9004 piR-6036 piR-370  
piR-122604 piR-4936 piR-3254  
piR-100019 piR-19590 piR-324  
piR-8551 piR-17735 piR-3238  
piR-29416 piR-136839 piR-3150  
piR-2739 piR-135801 piR-3007  
piR-138444 piR-135575 piR-30006  
piR-132165 piR-132051 piR-29976  
piR-128149 piR-130226 piR-29666  
piR-120276 piR-125758 piR-29620  
piR-117485 piR-124606 piR-29567  
piR-113764 piR-124504 piR-29096  
piR-112988 piR-123608 piR-29048  
piR-105326 piR-121306 piR-28377  
piR-102568 piR-119552 piR-27795  
piR-101737 piR-117534 piR-2772  
piR-2570 piR-115153 piR-27721  
piR-139756 piR-112385 piR-27646  
piR-13084 piR-112115 piR-275  
piR-3278 piR-111053 piR-27032  
piR-129480 piR-108504 piR-26670  
piR-12213 piR-103022 piR-26580  
piR-3151 piR-3579 piR-26546  
piR-17600 piR-27728 piR-2640  
piR-139942 piR-18585 piR-26079  
piR-128951 piR-14408 piR-25840  
piR-124180 piR-141974 piR-2552  
piR-107109 piR-140169 piR-25247  
piR-105438 piR-136101 piR-25124  
piR-105386 piR-133109 piR-25024  
piR-8823 piR-132727 piR-24762

|            |            |           |
|------------|------------|-----------|
| piR-28507  | piR-131805 | piR-24467 |
| piR-18871  | piR-13023  | piR-24430 |
| piR-15370  | piR-127948 | piR-24151 |
| piR-136738 | piR-127664 | piR-2391  |
| piR-116491 | piR-12735  | piR-2379  |
| piR-113891 | piR-124220 | piR-23630 |
| piR-11037  | piR-122887 | piR-23438 |
| piR-7934   | piR-120937 | piR-2342  |
| piR-132192 | piR-115256 | piR-23329 |
| piR-131193 | piR-110292 | piR-23278 |
| piR-12899  | piR-104370 | piR-23131 |
| piR-5860   | piR-103327 | piR-23028 |
| piR-126209 | piR-8473   | piR-22703 |
| piR-113693 | piR-4542   | piR-22317 |
| piR-107456 | piR-427    | piR-22316 |
| piR-3254   | piR-2928   | piR-22151 |
| piR-28961  | piR-17034  | piR-22001 |
| piR-120507 | piR-142177 | piR-21940 |
| piR-108813 | piR-141116 | piR-21840 |
| piR-12281  | piR-140489 | piR-21    |
| piR-11105  | piR-13968  | piR-2154  |
| piR-101176 | piR-139546 | piR-21321 |
| piR-2592   | piR-135973 | piR-21265 |
| piR-16747  | piR-135145 | piR-21219 |
| piR-135110 | piR-132952 | piR-21079 |
| piR-3424   | piR-129012 | piR-21017 |
| piR-124502 | piR-126832 | piR-2083  |
| piR-9540   | piR-124374 | piR-20748 |
| piR-141020 | piR-119198 | piR-20668 |
| piR-13334  | piR-119192 | piR-20613 |
| piR-116358 | piR-118800 | piR-2051  |
| piR-106847 | piR-116292 | piR-20210 |
| piR-24515  | piR-112426 | piR-20169 |
| piR-135560 | piR-111782 | piR-2015  |
| piR-132187 | piR-109459 | piR-20001 |
| piR-110437 | piR-105308 | piR-19908 |
| piR-142689 | piR-104788 | piR-19849 |
| piR-126009 | piR-102968 | piR-19795 |
| piR-114855 | piR-21417  | piR-19316 |
| piR-105024 | piR-139340 | piR-19179 |
| piR-6847   | piR-134479 | piR-19060 |
| piR-5141   | piR-130839 | piR-18763 |
| piR-16553  | piR-130435 | piR-18388 |
| piR-14082  | piR-128119 | piR-18162 |
| piR-139751 | piR-127950 | piR-17970 |
| piR-131066 | piR-120885 | piR-17955 |
| piR-125517 | piR-120863 | piR-17655 |
| piR-122508 | piR-118895 | piR-17384 |
| piR-119881 | piR-113841 | piR-17207 |
| piR-105791 | piR-103390 | piR-17193 |
| piR-1484   | piR-142581 | piR-171   |
| piR-137936 | piR-139396 | piR-17063 |
| piR-121668 | piR-135456 | piR-16782 |
| piR-16837  | piR-132697 | piR-16753 |



piR-16500 piR-127706 piR-16679  
piR-132043 piR-127704 piR-16477  
piR-106367 piR-127692 piR-16365  
piR-103628 piR-125126 piR-1627  
piR-3816 piR-121276 piR-16231  
piR-23072 piR-119935 piR-162  
piR-15613 piR-118550 piR-1591  
piR-110831 piR-114817 piR-15868  
piR-8267 piR-105554 piR-1586  
piR-4259 piR-103596 piR-15623  
piR-14159 piR-103374 piR-15564  
piR-115363 piR-101713 piR-15535  
piR-106216 piR-6716 piR-15509  
piR-19694 piR-141395 piR-15274  
piR-134832 piR-140550 piR-15271  
piR-133381 piR-1 piR-15191  
piR-12983 piR-136622 piR-15051  
piR-120806 piR-135612 piR-15019  
piR-29545 piR-134576 piR-1490  
piR-121768 piR-133811 piR-1438  
piR-12140 piR-132705 piR-14264  
piR-115107 piR-131144 piR-142531  
piR-9692 piR-127299 piR-142358  
piR-9399 piR-126263 piR-142055  
piR-7505 piR-124415 piR-141992  
piR-202 piR-124392 piR-141927  
piR-18209 piR-121932 piR-141327  
piR-16507 piR-119465 piR-141209  
piR-130708 piR-116840 piR-141165  
piR-11230 piR-114596 piR-141062  
piR-104054 piR-113465 piR-140936  
piR-100681 piR-107845 piR-140896  
piR-100055 piR-105242 piR-140838  
piR-8761 piR-104620 piR-140783  
piR-2376 piR-103749 piR-140750  
piR-136017 piR-8976 piR-140539  
piR-133178 piR-24878 piR-140509  
piR-9080 piR-23788 piR-140371  
piR-22889 piR-136967 piR-140246  
piR-111164 piR-131221 piR-140169  
piR-108013 piR-130307 piR-139999  
piR-101849 piR-127618 piR-139990  
piR-3519 piR-126985 piR-1397  
piR-120873 piR-124704 piR-139490  
piR-115178 piR-122765 piR-139200  
piR-108010 piR-120180 piR-138835  
piR-142176 piR-119660 piR-138717  
piR-131191 piR-119489 piR-13864  
piR-130376 piR-119014 piR-138586  
piR-105367 piR-114168 piR-138410  
piR-104140 piR-113622 piR-137767  
piR-101766 piR-113234 piR-137435  
piR-100531 piR-111225 piR-137351  
piR-29720 piR-110077 piR-137303

piR-132359 piR-108087 piR-136980  
piR-130509 piR-10650 piR-136673  
piR-119190 piR-101910 piR-136428  
piR-115803 piR-9472 piR-136157  
piR-113625 piR-28213 piR-135889  
piR-111807 piR-24067 piR-135815  
piR-131046 piR-16661 piR-135632  
piR-116017 piR-141366 piR-135537  
piR-115704 piR-140459 piR-135462  
piR-105909 piR-138231 piR-134840  
piR-102182 piR-13386 piR-134828  
piR-101961 piR-133631 piR-134763  
piR-28709 piR-132934 piR-134634  
piR-27569 piR-130768 piR-134423  
piR-16829 piR-129954 piR-133957  
piR-122442 piR-126473 piR-133767  
piR-116812 piR-125905 piR-13373  
piR-106940 piR-125808 piR-133645  
piR-24439 piR-125248 piR-133628  
piR-24098 piR-123541 piR-133195  
piR-140619 piR-122937 piR-133192  
piR-137649 piR-122602 piR-133084  
piR-133332 piR-118133 piR-132993  
piR-107637 piR-115249 piR-132836  
piR-101632 piR-115192 piR-132681  
piR-7148 piR-113077 piR-132331  
piR-139565 piR-110884 piR-132189  
piR-137103 piR-109905 piR-132055  
piR-120828 piR-108821 piR-131728  
piR-116374 piR-107656 piR-131586  
piR-21743 piR-105060 piR-131542  
piR-20518 piR-104805 piR-13145  
piR-29768 piR-102217 piR-131257  
piR-139268 piR-100854 piR-131238  
piR-138590 piR-7401 piR-13099  
piR-107829 piR-29998 piR-130988  
piR-1024 piR-28684 piR-130902  
piR-2451 piR-24646 piR-130839  
piR-105459 piR-19790 piR-130723  
piR-134620 piR-17462 piR-130708  
piR-109985 piR-140257 piR-130703  
piR-3271 piR-138741 piR-130628  
piR-28630 piR-134369 piR-130460  
piR-2808 piR-133589 piR-130110  
piR-132941 piR-132612 piR-129989  
piR-117430 piR-130786 piR-12998  
piR-105660 piR-128932 piR-129925  
piR-103606 piR-128471 piR-129924  
piR-5554 piR-12555 piR-129451  
piR-14517 piR-11775 piR-129208  
piR-140041 piR-117103 piR-129163  
piR-126035 piR-116574 piR-128982  
piR-125533 piR-114898 piR-12889  
piR-113887 piR-113414 piR-128532

piR-116897 piR-112444 piR-128298  
piR-113124 piR-111198 piR-128101  
piR-105165 piR-109745 piR-128099  
piR-104293 piR-108893 piR-128  
piR-29279 piR-108699 piR-127987  
piR-121030 piR-105633 piR-127962  
piR-116878 piR-102196 piR-12788  
piR-110500 piR-101120 piR-127788  
piR-109110 piR-28262 piR-127591  
piR-8335 piR-26504 piR-127574  
piR-4542 piR-22690 piR-127557  
piR-139750 piR-21595 piR-127477  
piR-128828 piR-21512 piR-127387  
piR-112762 piR-21375 piR-127318  
piR-17628 piR-19694 piR-127281  
piR-102494 piR-14400 piR-127012  
piR-17927 piR-140862 piR-126946  
piR-135164 piR-138774 piR-126686  
piR-13491 piR-135962 piR-12667  
piR-123376 piR-134811 piR-126590  
piR-119213 piR-131595 piR-126575  
piR-103541 piR-130315 piR-126356  
piR-138453 piR-128454 piR-126317  
piR-12956 piR-120441 piR-126146  
piR-118482 piR-118367 piR-125712  
piR-112247 piR-117716 piR-125602  
piR-111680 piR-115951 piR-12546  
piR-109660 piR-115389 piR-125459  
piR-7758 piR-113294 piR-125408  
piR-2484 piR-109546 piR-125318  
piR-110050 piR-106263 piR-1252  
piR-100753 piR-106172 piR-125005  
piR-26804 piR-105683 piR-124669  
piR-141063 piR-104193 piR-124611  
piR-127484 piR-8 piR-124385  
piR-14908 piR-5250 piR-124340  
piR-125246 piR-371 piR-124095  
piR-12492 piR-28967 piR-123987  
piR-117129 piR-25211 piR-123986  
piR-9083 piR-2272 piR-123920  
piR-15202 piR-137357 piR-123614  
piR-14175 piR-136580 piR-123191  
piR-12645 piR-132175 piR-123039  
piR-122377 piR-129585 piR-123029  
piR-116201 piR-128592 piR-122573  
piR-114115 piR-126500 piR-122411  
piR-8803 piR-125687 piR-122376  
piR-26604 piR-122363 piR-122352  
piR-133666 piR-117694 piR-121668  
piR-119808 piR-117620 piR-121643  
piR-103214 piR-108684 piR-121577  
piR-102095 piR-106024 piR-121348  
piR-4387 piR-104759 piR-121138  
piR-125588 piR-100145 piR-121015

|            |            |            |
|------------|------------|------------|
| piR-121626 | piR-9538   | piR-121014 |
| piR-121522 | piR-28802  | piR-120977 |
| piR-113907 | piR-18822  | piR-12093  |
| piR-110199 | piR-14303  | piR-120864 |
| piR-110160 | piR-142171 | piR-120855 |
| piR-124416 | piR-142168 | piR-120687 |
| piR-4070   | piR-141487 | piR-120654 |
| piR-116737 | piR-140423 | piR-12056  |
| piR-20937  | piR-139719 | piR-120517 |
| piR-112894 | piR-137996 | piR-120395 |
| piR-5960   | piR-136720 | piR-120235 |
| piR-27730  | piR-129810 | piR-120071 |
| piR-123191 | piR-128080 | piR-119760 |
| piR-114331 | piR-125175 | piR-119709 |
| piR-18830  | piR-122759 | piR-119237 |
| piR-17772  | piR-121803 | piR-118940 |
| piR-139157 | piR-119698 | piR-118788 |
| piR-134754 | piR-117218 | piR-118517 |
| piR-122698 | piR-116886 | piR-117977 |
| piR-122461 | piR-115922 | piR-117763 |
| piR-105370 | piR-114957 | piR-117697 |
| piR-27873  | piR-110839 | piR-117352 |
| piR-1762   | piR-107143 | piR-117224 |
| piR-140199 | piR-103844 | piR-117140 |
| piR-139342 | piR-103763 | piR-116238 |
| piR-118653 | piR-102911 | piR-116152 |
| piR-117331 | piR-101223 | piR-116    |
| piR-7744   | piR-3117   | piR-115960 |
| piR-137189 | piR-29709  | piR-115387 |
| piR-134852 | piR-28637  | piR-115246 |
| piR-131341 | piR-16775  | piR-115216 |
| piR-107662 | piR-16425  | piR-115183 |
| piR-105557 | piR-15099  | piR-114984 |
| piR-3534   | piR-15018  | piR-114843 |
| piR-26072  | piR-141469 | piR-11475  |
| piR-134786 | piR-137644 | piR-114648 |
| piR-100615 | piR-137225 | piR-114592 |
| piR-28483  | piR-136843 | piR-114575 |
| piR-25163  | piR-135502 | piR-113921 |
| piR-118510 | piR-133480 | piR-113886 |
| piR-116279 | piR-133366 | piR-11386  |
| piR-104203 | piR-130340 | piR-113740 |
| piR-18938  | piR-125504 | piR-113691 |
| piR-132577 | piR-123144 | piR-113621 |
| piR-132665 | piR-122953 | piR-113404 |
| piR-12161  | piR-120743 | piR-113318 |
| piR-117163 | piR-119314 | piR-113212 |
| piR-115588 | piR-115250 | piR-113194 |
| piR-113946 | piR-111942 | piR-113193 |
| piR-106815 | piR-111656 | piR-113027 |
| piR-10466  | piR-109207 | piR-112702 |
| piR-101555 | piR-108623 | piR-11225  |
| piR-17448  | piR-107981 | piR-112197 |
| piR-16633  | piR-107247 | piR-112195 |

piR-131016 piR-105717 piR-111972  
piR-122190 piR-105402 piR-111934  
piR-115434 piR-9787 piR-111766  
piR-103352 piR-24609 piR-111618  
piR-28814 piR-2320 piR-111567  
piR-16803 piR-15063 piR-111548  
piR-141347 piR-14125 piR-111546  
piR-124229 piR-139295 piR-111403  
piR-122622 piR-138128 piR-111127  
piR-118730 piR-135900 piR-111089  
piR-103245 piR-133360 piR-111072  
piR-26603 piR-13272 piR-110980  
piR-140013 piR-132347 piR-110913  
piR-131770 piR-127643 piR-110586  
piR-129734 piR-126541 piR-110575  
piR-6428 piR-126384 piR-110495  
piR-13705 piR-125497 piR-110494  
piR-12991 piR-125110 piR-110441  
piR-12540 piR-124280 piR-110368  
piR-113576 piR-114167 piR-110095  
piR-109354 piR-109962 piR-109888  
piR-6891 piR-10895 piR-109589  
piR-19123 piR-107141 piR-109562  
piR-130281 piR-106202 piR-10946  
piR-117036 piR-105900 piR-109164  
piR-114957 piR-10565 piR-109114  
piR-114404 piR-105302 piR-108948  
piR-6804 piR-105073 piR-108904  
piR-28026 piR-8420 piR-108024  
piR-119123 piR-7960 piR-107826  
piR-115591 piR-5274 piR-107818  
piR-101183 piR-4914 piR-107791  
piR-131502 piR-29846 piR-107762  
piR-130234 piR-28782 piR-107717  
piR-113665 piR-22277 piR-107651  
piR-112488 piR-21044 piR-107532  
piR-899 piR-16747 piR-107139  
piR-29857 piR-141721 piR-107109  
piR-138858 piR-136564 piR-10708  
piR-137442 piR-136380 piR-106969  
piR-1354 piR-135965 piR-106718  
piR-126300 piR-131905 piR-106589  
piR-115282 piR-123816 piR-106351  
piR-11504 piR-122914 piR-106305  
piR-108639 piR-119191 piR-105935  
piR-107574 piR-119011 piR-105888  
piR-106889 piR-109989 piR-105490  
piR-103390 piR-104406 piR-105325  
piR-100384 piR-101371 piR-105187  
piR-9786 piR-100481 piR-105125  
piR-28161 piR-8796 piR-105088  
piR-15856 piR-29552 piR-104933  
piR-138425 piR-28931 piR-104867  
piR-137020 piR-139818 piR-104864

piR-136836 piR-137620 piR-104496  
piR-135142 piR-136372 piR-104476  
piR-131442 piR-129039 piR-104463  
piR-124998 piR-127758 piR-103953  
piR-116671 piR-121416 piR-103918  
piR-106083 piR-120647 piR-103489  
piR-671 piR-103135 piR-103477  
piR-117774 piR-101838 piR-103409  
piR-113828 piR-28928 piR-103378  
piR-106125 piR-22164 piR-103372  
piR-29852 piR-16928 piR-103290  
piR-16482 piR-142664 piR-103288  
piR-132382 piR-139389 piR-103230  
piR-129066 piR-138966 piR-103086  
piR-117353 piR-131899 piR-103033  
piR-20496 piR-126311 piR-103012  
piR-109695 piR-125795 piR-102799  
piR-24106 piR-12563 piR-102729  
piR-142309 piR-124749 piR-1026  
piR-128824 piR-122575 piR-102575  
piR-114858 piR-121005 piR-102397  
piR-106366 piR-111466 piR-102308  
piR-117590 piR-110778 piR-1023  
piR-28634 piR-107020 piR-102153  
piR-24953 piR-106667 piR-102127  
piR-108758 piR-105909 piR-101862  
piR-125143 piR-104398 piR-101834  
piR-122804 piR-102436 piR-101793  
piR-120595 piR-100663 piR-101746  
piR-105395 piR-100083 piR-101663  
piR-3243 piR-21830 piR-101333  
piR-138032 piR-17828 piR-101230  
piR-104659 piR-15627 piR-101059  
piR-102012 piR-15450 piR-100996  
piR-119097 piR-140374 piR-100823  
piR-125460 piR-140373 piR-100342  
piR-4158 piR-139350 piR-100254  
piR-30013 piR-126753 piR-100230  
piR-28623 piR-123644 piR-100099  
piR-28277 piR-121202 piR-100038  
piR-25535 piR-121021 piR-9767  
piR-140185 piR-118676 piR-9751  
piR-130840 piR-117935 piR-9619  
piR-126866 piR-116465 piR-9608  
piR-107137 piR-114231 piR-9535  
piR-106469 piR-112910 piR-9476  
piR-26019 piR-111603 piR-9190  
piR-24292 piR-109529 piR-9095  
piR-134533 piR-109419 piR-9034  
piR-129648 piR-105729 piR-8845  
piR-9974 piR-104539 piR-8773  
piR-17807 piR-102292 piR-861  
piR-132922 piR-100638 piR-857  
piR-29649 piR-100026 piR-8463

|            |            |           |
|------------|------------|-----------|
| piR-129980 | piR-949    | piR-836   |
| piR-120100 | piR-9213   | piR-8326  |
| piR-111757 | piR-7008   | piR-8318  |
| piR-16662  | piR-4694   | piR-8246  |
| piR-138128 | piR-27559  | piR-8052  |
| piR-130256 | piR-23827  | piR-7902  |
| piR-141465 | piR-20922  | piR-7788  |
| piR-133219 | piR-19925  | piR-7773  |
| piR-123937 | piR-1729   | piR-7740  |
| piR-28435  | piR-15755  | piR-7708  |
| piR-130113 | piR-141722 | piR-7113  |
| piR-126242 | piR-140839 | piR-7102  |
| piR-8055   | piR-140790 | piR-7041  |
| piR-6709   | piR-140654 | piR-6882  |
| piR-6330   | piR-132348 | piR-680   |
| piR-4170   | piR-132044 | piR-6785  |
| piR-122833 | piR-129655 | piR-6734  |
| piR-122660 | piR-127625 | piR-6652  |
| piR-118244 | piR-126795 | piR-64    |
| piR-7914   | piR-119219 | piR-6350  |
| piR-29806  | piR-119206 | piR-6333  |
| piR-116655 | piR-118694 | piR-6269  |
| piR-110432 | piR-118055 | piR-6107  |
| piR-102690 | piR-116858 | piR-5806  |
| piR-6741   | piR-116095 | piR-5743  |
| piR-141291 | piR-112748 | piR-5673  |
| piR-12299  | piR-111586 | piR-5585  |
| piR-7133   | piR-109074 | piR-5584  |
| piR-28736  | piR-106927 | piR-546   |
| piR-23936  | piR-106545 | piR-5460  |
| piR-128364 | piR-103859 | piR-5427  |
| piR-127158 | piR-102866 | piR-4980  |
| piR-124651 | piR-9053   | piR-4926  |
| piR-8991   | piR-21602  | piR-4905  |
| piR-4477   | piR-21589  | piR-4903  |
| piR-3030   | piR-21116  | piR-4471  |
| piR-29855  | piR-1904   | piR-4459  |
| piR-135305 | piR-15505  | piR-443   |
| piR-134256 | piR-138771 | piR-4083  |
| piR-106386 | piR-136240 | piR-38    |
| piR-141808 | piR-135827 | piR-3587  |
| piR-136207 | piR-131770 | piR-3514  |
| piR-12120  | piR-130489 | piR-3507  |
| piR-110190 | piR-127231 | piR-345   |
| piR-4352   | piR-127037 | piR-3406  |
| piR-130726 | piR-12289  | piR-3363  |
| piR-124876 | piR-122377 | piR-3325  |
| piR-10746  | piR-121676 | piR-3291  |
| piR-135007 | piR-116508 | piR-3274  |
| piR-127647 | piR-115812 | piR-317   |
| piR-104982 | piR-113586 | piR-29943 |
| piR-10448  | piR-113578 | piR-29942 |
| piR-4415   | piR-111596 | piR-29835 |
| piR-13770  | piR-110269 | piR-29506 |

piR-128848 piR-109688 piR-29365  
piR-119708 piR-108770 piR-29301  
piR-116231 piR-108289 piR-29255  
piR-109708 piR-108009 piR-29112  
piR-2348 piR-107204 piR-28826  
piR-17091 piR-104150 piR-28717  
piR-120414 piR-6067 piR-28388  
piR-107819 piR-2793 piR-28316  
piR-103165 piR-27638 piR-28103  
piR-3169 piR-23158 piR-28054  
piR-25213 piR-19140 piR-27455  
piR-2507 piR-16171 piR-27422  
piR-127600 piR-141429 piR-27329  
piR-127279 piR-140931 piR-2729  
piR-121113 piR-13151 piR-27218  
piR-104681 piR-129076 piR-2718  
piR-9544 piR-126151 piR-27172  
piR-7240 piR-125261 piR-27  
piR-139012 piR-122066 piR-26952  
piR-131364 piR-118132 piR-26711  
piR-129475 piR-113308 piR-26689  
piR-116989 piR-112926 piR-26513  
piR-8588 piR-112820 piR-26024  
piR-4417 piR-107613 piR-26000  
piR-136344 piR-105794 piR-25855  
piR-123137 piR-101733 piR-25778  
piR-117460 piR-101650 piR-25594  
piR-114440 piR-8743 piR-25515  
piR-101166 piR-7088 piR-25460  
piR-137635 piR-5166 piR-25404  
piR-131880 piR-14514 piR-25348  
piR-11667 piR-140871 piR-25112  
piR-101109 piR-139636 piR-25048  
piR-3644 piR-137677 piR-24948  
piR-8733 piR-135881 piR-24699  
piR-427 piR-13045 piR-24551  
piR-26501 piR-129737 piR-24332  
piR-25189 piR-12579 piR-24198  
piR-123819 piR-122767 piR-24143  
piR-5861 piR-121486 piR-24094  
piR-114450 piR-119768 piR-23895  
piR-108281 piR-118737 piR-23826  
piR-4957 piR-117017 piR-2378  
piR-24620 piR-114050 piR-23740  
piR-20801 piR-113927 piR-23397  
piR-121216 piR-112514 piR-23204  
piR-114730 piR-111693 piR-23094  
piR-103724 piR-108023 piR-23046  
piR-29398 piR-107810 piR-23037  
piR-113914 piR-101053 piR-22966  
piR-11084 piR-8838 piR-22700  
piR-10707 piR-8043 piR-22621  
piR-29614 piR-27873 piR-22615  
piR-24042 piR-2587 piR-2246



|            |            |           |
|------------|------------|-----------|
| piR-1867   | piR-25262  | piR-22448 |
| piR-139546 | piR-24607  | piR-22447 |
| piR-131538 | piR-21945  | piR-22149 |
| piR-114832 | piR-16976  | piR-22050 |
| piR-101380 | piR-141350 | piR-22022 |
| piR-9958   | piR-138656 | piR-22011 |
| piR-108806 | piR-137117 | piR-21969 |
| piR-107874 | piR-137084 | piR-21955 |
| piR-14874  | piR-137039 | piR-21905 |
| piR-135326 | piR-135787 | piR-21559 |
| piR-131033 | piR-132857 | piR-21421 |
| piR-115783 | piR-131362 | piR-21225 |
| piR-114396 | piR-123596 | piR-21066 |
| piR-107025 | piR-118088 | piR-20853 |
| piR-132797 | piR-115396 | piR-20848 |
| piR-120603 | piR-114599 | piR-20783 |
| piR-132878 | piR-107003 | piR-20742 |
| piR-127361 | piR-106059 | piR-20618 |
| piR-123927 | piR-105789 | piR-20242 |
| piR-12391  | piR-101246 | piR-20072 |
| piR-119364 | piR-5908   | piR-20057 |
| piR-113058 | piR-28959  | piR-19842 |
| piR-112408 | piR-28882  | piR-19656 |
| piR-5865   | piR-2663   | piR-19447 |
| piR-2803   | piR-24929  | piR-19404 |
| piR-24794  | piR-19314  | piR-19300 |
| piR-18095  | piR-17745  | piR-19273 |
| piR-122077 | piR-141936 | piR-19256 |
| piR-105268 | piR-141802 | piR-19240 |
| piR-6510   | piR-13999  | piR-19236 |
| piR-19316  | piR-134864 | piR-18900 |
| piR-131086 | piR-134415 | piR-1879  |
| piR-119570 | piR-131160 | piR-18768 |
| piR-117991 | piR-129157 | piR-18723 |
| piR-11584  | piR-127363 | piR-18703 |
| piR-105011 | piR-122320 | piR-18614 |
| piR-103774 | piR-120587 | piR-18493 |
| piR-8254   | piR-120566 | piR-18461 |
| piR-3814   | piR-119898 | piR-18441 |
| piR-18975  | piR-118324 | piR-18357 |
| piR-141281 | piR-117521 | piR-18087 |
| piR-140464 | piR-109414 | piR-17898 |
| piR-129569 | piR-103067 | piR-17735 |
| piR-129143 | piR-102385 | piR-17690 |
| piR-123778 | piR-101511 | piR-17472 |
| piR-111860 | piR-100289 | piR-17413 |
| piR-111127 | piR-9465   | piR-17334 |
| piR-111023 | piR-8457   | piR-17073 |
| piR-108697 | piR-8456   | piR-16965 |
| piR-9367   | piR-4256   | piR-16793 |
| piR-126527 | piR-407    | piR-16395 |
| piR-12591  | piR-29471  | piR-1636  |
| piR-125681 | piR-27771  | piR-16269 |
| piR-120395 | piR-23744  | piR-16088 |

piR-103764 piR-142652 piR-157  
piR-2595 piR-141206 piR-15630  
piR-23229 piR-141032 piR-15210  
piR-141159 piR-140124 piR-1474  
piR-138098 piR-139288 piR-14654  
piR-100286 piR-138286 piR-14322  
piR-6000 piR-135959 piR-142640  
piR-28034 piR-13430 piR-142619  
piR-136909 piR-130992 piR-142402  
piR-123657 piR-129797 piR-142296  
piR-115774 piR-125500 piR-142248  
piR-111940 piR-122870 piR-142209  
piR-22724 piR-12131 piR-142125  
piR-141360 piR-120573 piR-14202  
piR-129130 piR-118734 piR-142002  
piR-118105 piR-117920 piR-141980  
piR-112979 piR-117268 piR-141976  
piR-105871 piR-115919 piR-141858  
piR-6068 piR-114102 piR-141767  
piR-3412 piR-113756 piR-141683  
piR-24287 piR-108407 piR-14161  
piR-111625 piR-107499 piR-141455  
piR-19496 piR-104921 piR-141452  
piR-126539 piR-104018 piR-141403  
piR-103932 piR-9517 piR-141342  
piR-29967 piR-28819 piR-140931  
piR-14772 piR-25432 piR-140758  
piR-128963 piR-21333 piR-140695  
piR-112815 piR-19046 piR-140691  
piR-106273 piR-1798 piR-140589  
piR-6025 piR-142599 piR-140413  
piR-131520 piR-134343 piR-140338  
piR-129888 piR-132702 piR-140224  
piR-129340 piR-12955 piR-140078  
piR-121737 piR-127875 piR-139536  
piR-106183 piR-12784 piR-139423  
piR-105338 piR-127507 piR-139397  
piR-21518 piR-126569 piR-139328  
piR-19203 piR-12638 piR-139324  
piR-19155 piR-121371 piR-139319  
piR-17869 piR-119475 piR-139271  
piR-17351 piR-119429 piR-139151  
piR-141409 piR-118420 piR-139078  
piR-130294 piR-113617 piR-139037  
piR-121550 piR-113265 piR-138870  
piR-10782 piR-112938 piR-13882  
piR-103834 piR-111319 piR-138808  
piR-4277 piR-111287 piR-138791  
piR-2533 piR-107787 piR-138763  
piR-127268 piR-106881 piR-138737  
piR-102783 piR-104717 piR-138637  
piR-132618 piR-104210 piR-138554  
piR-126372 piR-101295 piR-138542  
piR-124630 piR-100577 piR-138533

|            |            |            |
|------------|------------|------------|
| piR-120881 | piR-9231   | piR-138486 |
| piR-115658 | piR-6052   | piR-13834  |
| piR-25385  | piR-23743  | piR-13831  |
| piR-133976 | piR-136249 | piR-138302 |
| piR-132029 | piR-134880 | piR-138222 |
| piR-131834 | piR-134101 | piR-138169 |
| piR-115559 | piR-133146 | piR-138105 |
| piR-6783   | piR-128371 | piR-137834 |
| piR-29120  | piR-126656 | piR-137678 |
| piR-23343  | piR-12285  | piR-137669 |
| piR-1537   | piR-120282 | piR-13766  |
| piR-14105  | piR-120040 | piR-137520 |
| piR-13000  | piR-119713 | piR-137493 |
| piR-132127 | piR-118639 | piR-137462 |
| piR-8213   | piR-118026 | piR-137406 |
| piR-141936 | piR-115835 | piR-137177 |
| piR-124760 | piR-115201 | piR-136937 |
| piR-109337 | piR-110845 | piR-13685  |
| piR-105093 | piR-110468 | piR-136772 |
| piR-12771  | piR-109452 | piR-136718 |
| piR-125444 | piR-109257 | piR-136700 |
| piR-125393 | piR-108529 | piR-136683 |
| piR-11949  | piR-107983 | piR-136525 |
| piR-117340 | piR-107809 | piR-136400 |
| piR-114465 | piR-107703 | piR-136379 |
| piR-103577 | piR-103819 | piR-136219 |
| piR-29820  | piR-2953   | piR-135476 |
| piR-24609  | piR-25537  | piR-135445 |
| piR-13096  | piR-19193  | piR-135026 |
| piR-112911 | piR-17565  | piR-13480  |
| piR-110314 | piR-15122  | piR-134430 |
| piR-109455 | piR-138969 | piR-134405 |
| piR-100305 | piR-138260 | piR-134364 |
| piR-100223 | piR-136794 | piR-134360 |
| piR-4669   | piR-133381 | piR-134198 |
| piR-29611  | piR-133281 | piR-134157 |
| piR-2644   | piR-130986 | piR-134067 |
| piR-21830  | piR-127800 | piR-134041 |
| piR-19776  | piR-127318 | piR-133635 |
| piR-140296 | piR-121797 | piR-133558 |
| piR-131247 | piR-121453 | piR-133424 |
| piR-115368 | piR-121277 | piR-132965 |
| piR-108472 | piR-119602 | piR-132932 |
| piR-105183 | piR-116975 | piR-132903 |
| piR-8464   | piR-115297 | piR-132759 |
| piR-5596   | piR-114136 | piR-132675 |
| piR-141487 | piR-109860 | piR-132585 |
| piR-140026 | piR-108956 | piR-132539 |
| piR-134252 | piR-100305 | piR-132198 |
| piR-132971 | piR-7899   | piR-132193 |
| piR-121079 | piR-3286   | piR-132149 |
| piR-117773 | piR-29752  | piR-132128 |
| piR-110414 | piR-28072  | piR-132059 |
| piR-106552 | piR-24137  | piR-131748 |

piR-133241 piR-22629 piR-131672  
piR-123978 piR-141061 piR-131562  
piR-120282 piR-138270 piR-131529  
piR-120198 piR-137295 piR-131519  
piR-114808 piR-134763 piR-131476  
piR-107820 piR-134539 piR-131382  
piR-101558 piR-132742 piR-130940  
piR-28224 piR-131558 piR-130881  
piR-15362 piR-131174 piR-130820  
piR-120090 piR-130900 piR-130726  
piR-113870 piR-130685 piR-130228  
piR-100073 piR-123310 piR-130075  
piR-141666 piR-122707 piR-130037  
piR-140939 piR-120796 piR-129890  
piR-12201 piR-118562 piR-129819  
piR-117431 piR-11630 piR-129597  
piR-117125 piR-114855 piR-129364  
piR-23040 piR-110603 piR-129190  
piR-132176 piR-107112 piR-129007  
piR-130507 piR-106565 piR-128994  
piR-129082 piR-105772 piR-128989  
piR-126538 piR-100519 piR-128967  
piR-119442 piR-5855 piR-128716  
piR-105052 piR-3226 piR-128678  
piR-102357 piR-28898 piR-128341  
piR-19954 piR-22724 piR-128316  
piR-138235 piR-16344 piR-128138  
piR-124948 piR-15196 piR-127985  
piR-119080 piR-141410 piR-127807  
piR-116495 piR-139275 piR-127806  
piR-111081 piR-13747 piR-127785  
piR-100558 piR-1343 piR-127756  
piR-134426 piR-131642 piR-127640  
piR-133492 piR-129734 piR-127638  
piR-120532 piR-128167 piR-127633  
piR-117897 piR-12575 piR-127470  
piR-116838 piR-125448 piR-127157  
piR-102704 piR-124381 piR-12713  
piR-100683 piR-1242 piR-127102  
piR-8668 piR-123804 piR-127055  
piR-29703 piR-121542 piR-126938  
piR-29089 piR-121522 piR-126856  
piR-141524 piR-120931 piR-126821  
piR-141100 piR-120655 piR-126630  
piR-140556 piR-120629 piR-126577  
piR-103197 piR-118212 piR-12651  
piR-3370 piR-116561 piR-126335  
piR-22604 piR-115221 piR-126327  
piR-111844 piR-114640 piR-126276  
piR-12337 piR-114265 piR-126185  
piR-120850 piR-112143 piR-126160  
piR-10275 piR-107798 piR-126137  
piR-2296 piR-8335 piR-12602  
piR-123054 piR-6876 piR-125929

|            |            |            |
|------------|------------|------------|
| piR-119098 | piR-5612   | piR-125860 |
| piR-8599   | piR-3232   | piR-125801 |
| piR-4800   | piR-20783  | piR-125745 |
| piR-29800  | piR-20709  | piR-125547 |
| piR-133627 | piR-142364 | piR-12545  |
| piR-130463 | piR-139258 | piR-124957 |
| piR-108890 | piR-138611 | piR-124914 |
| piR-102898 | piR-136923 | piR-124760 |
| piR-5455   | piR-133805 | piR-124560 |
| piR-29625  | piR-129092 | piR-124101 |
| piR-21904  | piR-127900 | piR-123974 |
| piR-122667 | piR-126255 | piR-123948 |
| piR-116413 | piR-125965 | piR-123925 |
| piR-104082 | piR-125855 | piR-123898 |
| piR-321    | piR-123150 | piR-123866 |
| piR-3026   | piR-106511 | piR-123719 |
| piR-19309  | piR-104239 | piR-123715 |
| piR-133494 | piR-103845 | piR-123605 |
| piR-129391 | piR-101921 | piR-123575 |
| piR-118349 | piR-101484 | piR-123478 |
| piR-115727 | piR-3292   | piR-123390 |
| piR-113840 | piR-26205  | piR-123310 |
| piR-111415 | piR-23870  | piR-123061 |
| piR-2939   | piR-141261 | piR-123059 |
| piR-133221 | piR-138618 | piR-123047 |
| piR-126091 | piR-136541 | piR-122974 |
| piR-126062 | piR-135265 | piR-122937 |
| piR-29055  | piR-133715 | piR-122742 |
| piR-131433 | piR-123864 | piR-122456 |
| piR-111318 | piR-123142 | piR-122453 |
| piR-104160 | piR-120151 | piR-122342 |
| piR-8179   | piR-120068 | piR-122301 |
| piR-24034  | piR-116889 | piR-121768 |
