# Supplementary material for: Knockout of glutathione peroxidase 5 down-regulates the piRNAs in the caput epididymidis of aged mice
Source: PubMed Central journal article supplement — Asian J Androl. 2020 Apr 7;22(6):590–601. doi: 10.4103/aja.aja_3_20 (PMC7705982; doi:10.4103/aja.aja_3_20), 2020-04-07
Supplement: AJA-22-590_Suppl5.pdf [file AJA-22-590_Suppl5.pdf]

| Gene Symbol  | Gene Name     | As a potential target to () piRNAs |
|--------------|---------------|------------------------------------|
| NR_001461    | Kcnqlot1      | 281                                |
| NR_001463    | Xist          | 213                                |
| NM_001112798 | Slc8a1        | 212                                |
| NM_001040106 | Aak1          | 207                                |
| NM_009261    | Strbp         | 202                                |
| NM_001145952 | Lpp           | 201                                |
| NM_015794    | Fbxl17        | 194                                |
| NM_009873    | Cdk6          | 181                                |
| NM_194268    | Onecut2       | 180                                |
| NM_001033322 | Gucy1a2       | 178                                |
| NM_001083120 | Enah          | 178                                |
| NM_011137    | Pou2f1        | 178                                |
| NM_144812    | Tnrc6b        | 178                                |
| NM_133218    | Zfp704        | 177                                |
| NM_007397    | Acvr2b        | 176                                |
| NM_025292    | Synj2bp       | 175                                |
| NM_009793    | Camk4         | 174                                |
| NM_007561    | Bmpr2         | 172                                |
| NM_001163610 | Nhs12         | 170                                |
| NM_010243    | Fut9          | 170                                |
| NM_023045    | Xpo7          | 170                                |
| NM_172458    | Zfp871        | 170                                |
| NM_011599    | Tle1          | 168                                |
| NM_153409    | Csrnp3        | 168                                |
| NM_177185    | Ubn2          | 168                                |
| NM_001081436 | Ino80d        | 167                                |
| NM_001110240 | Slc24a2       | 166                                |
| NM_018823    | Nfat5         | 166                                |
| NM_175234    | 6230409E13Rik | 166                                |
| NM_172538    | Vezt          | 165                                |
| NM_001110222 | Dcx           | 164                                |
| NM_025335    | Tmem167       | 164                                |
| NM_207659    | Hook3         | 164                                |
| NM_001038710 | Tmod2         | 163                                |
| NM_011990    | Slc7a11       | 163                                |
| NM_017391    | Slc5a3        | 163                                |
| NM_021458    | Fzd3          | 163                                |
| NM_025965    | Ssr1          | 163                                |
| NM_178778    | Scai          | 163                                |
| NM_001076789 | Cbx5          | 162                                |
| NM_011753    | Zfp26         | 162                                |
| NM_023214    | Slc30a7       | 162                                |
| NM_153794    | 4933403F05Rik | 162                                |
| NM_011770    | Ikzf2         | 161                                |
| NM_027384    | Tet1          | 161                                |
| NM_021530    | Slc4a8        | 160                                |
| NM_008417    | Kcna2         | 159                                |
| NM_027604    | Usp15         | 159                                |
| NM_199009    | Fam160a2      | 159                                |
| NM_001040682 | Clmn          | 158                                |
| NM_001081979 | Mecp2         | 158                                |
| NM_001103156 | Steap2        | 158                                |
| NM_001164086 | Homer2        | 158                                |

|              |               |     |
|--------------|---------------|-----|
| NM_009124    | Atxn1         | 158 |
| NM_001110209 | Lnp           | 157 |
| NM_177633    | Ubxn7         | 156 |
| NM_001163314 | Pgap1         | 155 |
| NM_207671    | Zfp318        | 155 |
| NM_001077514 | Slc1a2        | 154 |
| NM_026647    | Zdhhc21       | 154 |
| NM_144825    | Taok1         | 154 |
| NM_201369    | N4bp212       | 153 |
| NM_001081267 | Rsf1          | 152 |
| NM_001127177 | Ptpn2         | 152 |
| NM_001165954 | Phc3          | 152 |
| NM_139141    | Zfp192        | 152 |
| NM_009622    | Adcy1         | 151 |
| NM_010154    | ErbB4         | 151 |
| NM_023852    | Rab3c         | 151 |
| NM_027626    | Psd3          | 151 |
| NM_173441    | Iws1          | 151 |
| NM_197990    | 1700025G04Rik | 151 |
| NM_011946    | Map3k2        | 150 |
| NM_023755    | Tcfcp211      | 150 |
| NM_027238    | Ttc39b        | 150 |
| NM_134163    | Mbnl3         | 150 |
| NM_009986    | Cux1          | 148 |
| NM_010587    | Itsn1         | 148 |
| NM_001161822 | Rgs17         | 147 |
| NM_008420    | Kcnb1         | 147 |
| NM_011169    | Pr1r          | 147 |
| NM_145990    | Cdk5rap2      | 147 |
| NM_009472    | Unc5c         | 146 |
| NM_021464    | Ptprt         | 146 |
| NM_001024952 | Rc3h1         | 145 |
| NM_001164663 | 9830001H06Rik | 145 |
| NM_001166584 | Tead1         | 145 |
| NM_025978    | Ttc14         | 145 |
| NM_027490    | Dcp2          | 145 |
| NM_029441    | Cdyl2         | 145 |
| NM_175465    | Sestd1        | 145 |
| NM_177093    | Lrrc58        | 145 |
| NR_027799    | Tbrg3         | 145 |
| NM_001098225 | Adam22        | 144 |
| NM_001163572 | Tmem170b      | 144 |
| NM_009154    | Sema5a        | 144 |
| NM_013668    | Kdm5c         | 143 |
| NM_001033369 | Acvr1c        | 142 |
| NM_001112796 | Bicd1         | 142 |
| NM_001195284 | Fsd11         | 142 |
| NM_007715    | Clock         | 142 |
| NM_007733    | Col19a1       | 142 |
| NM_010754    | Smad2         | 142 |
| NM_013646    | Rora          | 142 |
| NM_146261    | Fam199x       | 142 |
| NR_015526    | A830082N09Rik | 142 |
| NM_001007576 | Gucy2f        | 141 |

|              |               |     |
|--------------|---------------|-----|
| NM_001024205 | Nufip2        | 141 |
| NM_001033634 | Zygl1b        | 141 |
| NM_001177884 | Whsc1         | 141 |
| NM_009767    | Chic1         | 141 |
| NM_001033430 | Jhdm1d        | 140 |
| NM_001082553 | Rab27b        | 140 |
| NM_001174107 | Map3k9        | 140 |
| NM_007896    | Mapre1        | 140 |
| NM_011374    | St8sial       | 140 |
| NM_172772    | Fam63b        | 140 |
| NM_175367    | Ston2         | 140 |
| NM_177378    | Rnf150        | 140 |
| NM_001037726 | Creb1         | 139 |
| NM_001110231 | Celf2         | 139 |
| NM_001111110 | Cmah          | 139 |
| NM_001122952 | Nfia          | 139 |
| NM_010230    | Fmn1          | 139 |
| NM_011221    | Purb          | 139 |
| NM_172513    | Fam126b       | 139 |
| NM_001111274 | Igf1          | 137 |
| NM_001114611 | Stxbp51       | 137 |
| NM_001115130 | Zbtb44        | 137 |
| NM_008976    | Ptpn14        | 137 |
| NM_009517    | Zmat3         | 137 |
| NM_026171    | Nv1           | 137 |
| NM_172868    | Palm2         | 137 |
| NM_198652    | Hjurp         | 137 |
| NM_010763    | Man1a2        | 136 |
| NM_026046    | Zfp329        | 136 |
| NM_138651    | Cds2          | 136 |
| NM_144910    | Cnot6l        | 136 |
| NM_181071    | Tanc2         | 136 |
| NM_001029889 | Gm608         | 135 |
| NM_001033173 | Usp31         | 135 |
| NM_001033636 | Prex2         | 135 |
| NM_001037937 | Deptor        | 135 |
| NM_001166501 | Dennd1b       | 135 |
| NM_025301    | Mrpl17        | 135 |
| NM_172841    | Slco5a1       | 135 |
| NM_001024856 | Ttbk2         | 134 |
| NM_001166385 | Sp4           | 134 |
| NM_001166414 | Rfx3          | 134 |
| NM_019517    | Bace2         | 134 |
| NM_020259    | Hhip          | 134 |
| NM_175266    | Epm2aip1      | 134 |
| NR_002322    | Tug1          | 134 |
| NM_001136104 | Ab12          | 133 |
| NM_026917    | Zdhhc3        | 133 |
| NM_144904    | Rod1          | 133 |
| NM_178256    | Reps2         | 133 |
| NR_027980    | 1700001L05Rik | 133 |
| NM_001025615 | Ccdc50        | 132 |
| NM_009234    | Sox11         | 132 |
| NM_009551    | Zfand5        | 132 |

|              |               |     |
|--------------|---------------|-----|
| NM_011749    | Zfp148        | 132 |
| NM_013835    | Trove2        | 132 |
| NM_021716    | Fign          | 132 |
| NM_001025568 | Pdelc         | 131 |
| NM_001043354 | Rorb          | 131 |
| NM_001145977 | Cadm2         | 131 |
| NM_010595    | Kcna1         | 131 |
| NM_027629    | Pgm211        | 131 |
| NM_178746    | Slc38a9       | 131 |
| NR_030690    | E330033B04Rik | 131 |
| NM_001037099 | Cacnb4        | 130 |
| NM_001081344 | Stxbp5        | 130 |
| NM_001195046 | Pak3          | 130 |
| NM_009982    | Ctsc          | 130 |
| NM_011276    | Rlim          | 130 |
| NM_029885    | Gabpb2        | 130 |
| NM_139232    | Fgd4          | 130 |
| NM_139294    | Braf          | 130 |
| NM_172643    | Zbtb41        | 130 |
| NM_175162    | Stox2         | 130 |
| NM_178143    | Prkaa2        | 130 |
| NR_033657    | Miat          | 130 |
| NM_001025559 | Sox6          | 129 |
| NM_001033257 | Phactr2       | 129 |
| NM_001113209 | Nfib          | 129 |
| NM_001136067 | Ikbkg         | 129 |
| NM_007592    | Car8          | 129 |
| NM_009951    | Igf2bp1       | 129 |
| NM_016700    | Mapk8         | 129 |
| NM_028099    | Dusp11        | 129 |
| NM_153402    | Eif2c3        | 129 |
| NM_153582    | Cmtm4         | 129 |
| NM_001029877 | Nova2         | 128 |
| NM_001080931 | Med13         | 128 |
| NM_001159533 | Cacna1c       | 128 |
| NM_001160368 | Rnf152        | 128 |
| NM_013476    | Ar            | 128 |
| NM_027425    | Rufy2         | 128 |
| NM_145991    | Cdc73         | 128 |
| NM_001039493 | Plekhm3       | 127 |
| NM_001164041 | Smad5         | 127 |
| NM_008575    | Mdm4          | 127 |
| NM_181546    | Syt14         | 127 |
| NM_001111026 | Runx1t1       | 126 |
| NM_001161420 | Vldlr         | 126 |
| NM_008855    | Prkeb         | 126 |
| NM_013672    | Sp1           | 126 |
| NM_028149    | Fbxl20        | 126 |
| NM_029250    | Etnk1         | 126 |
| NM_053191    | Pi15          | 126 |
| NM_145514    | Wdr26         | 126 |
| NM_145962    | Pank3         | 126 |
| NR_027640    | Ralgps2       | 126 |
| NR_027838    | Atp2a2        | 126 |

|              |               |     |
|--------------|---------------|-----|
| NM_001164806 | Bend4         | 125 |
| NM_007754    | Cpd           | 125 |
| NM_008825    | Pfkfb2        | 125 |
| NM_010472    | Agfgl         | 125 |
| NM_022563    | Ddr2          | 125 |
| NM_028815    | Cep97         | 125 |
| NM_181595    | Ppp1r9a       | 125 |
| NR_003292    | Zxda          | 125 |
| NR_027993    | Gm3414        | 125 |
| NM_001024468 | Bcat1         | 124 |
| NM_001033475 | Tmed8         | 124 |
| NM_001113564 | Serbp1        | 124 |
| NM_001134480 | Plcx2         | 124 |
| NM_001164717 | Sh3pxd2a      | 124 |
| NM_001193266 | Mdga2         | 124 |
| NM_001204915 | Reep3         | 124 |
| NM_010513    | Igf1r         | 124 |
| NM_021297    | Tlr4          | 124 |
| NR_027710    | Ppargc1a      | 124 |
| NM_001079830 | Trim33        | 123 |
| NM_011101    | Prkca         | 123 |
| NM_021361    | Noval         | 123 |
| NM_021362    | Pappa         | 123 |
| NM_027444    | Bbx           | 123 |
| NM_032000    | Trps1         | 123 |
| NM_177192    | Dennd5b       | 123 |
| NM_001039126 | Asb1          | 122 |
| NM_001081269 | Whsc111       | 122 |
| NM_001164441 | Ankrd33b      | 122 |
| NM_001164528 | Ildr2         | 122 |
| NM_001172096 | 2700078E11Rik | 122 |
| NM_007872    | Dnmt3a        | 122 |
| NM_008960    | Pten          | 122 |
| NM_010576    | Itga4         | 122 |
| NM_021881    | Qk            | 122 |
| NM_178061    | Mobk12b       | 122 |
| NM_178936    | Tmem56        | 122 |
| NM_183355    | Pbx1          | 122 |
| NM_001024950 | Zfp563        | 121 |
| NM_001081203 | Sbno1         | 121 |
| NM_001081229 | Tsc22d2       | 121 |
| NM_001165980 | Dcaf17        | 121 |
| NM_007400    | Adam12        | 121 |
| NM_007545    | Hrk           | 121 |
| NM_009782    | Cacna1e       | 121 |
| NM_009874    | Cdk7          | 121 |
| NM_013722    | Syn3          | 121 |
| NM_028234    | Rbm33         | 121 |
| NM_153135    | Unc5d         | 121 |
| NM_172925    | Klh131        | 121 |
| NM_177586    | Eif5a2        | 121 |
| NM_177644    | Rasal2        | 121 |
| NM_001038999 | Atp8a1        | 120 |
| NM_001195031 | Pag1          | 120 |

|              |               |     |
|--------------|---------------|-----|
| NM_010864    | Myo5a         | 120 |
| NM_011302    | Rs1           | 120 |
| NM_019806    | Vapb          | 120 |
| NM_021310    | Jmy           | 120 |
| NM_029869    | Zkscan1       | 120 |
| NR_027890    | 5031426D15Rik | 120 |
| NM_001001883 | Hecw2         | 119 |
| NM_001080930 | Atxn11        | 119 |
| NM_001142948 | Pogk          | 119 |
| NM_001163505 | At13          | 119 |
| NM_001163703 | Dcun1d3       | 119 |
| NM_001200002 | Tmppe         | 119 |
| NM_013584    | Lifr          | 119 |
| NM_026435    | Ufml          | 119 |
| NM_028871    | Hnrnpr        | 119 |
| NM_033565    | Aff4          | 119 |
| NM_153167    | Dcaf10        | 119 |
| NM_153516    | Bcl2l13       | 119 |
| NM_178704    | Dpy1913       | 119 |
| NR_037973    | LOC100502868  | 119 |
| NM_001025613 | Otud7b        | 118 |
| NM_001033275 | Gxylt1        | 118 |
| NM_001077354 | C77370        | 118 |
| NM_001080814 | Fat3          | 118 |
| NM_001111052 | Dclk1         | 118 |
| NM_001145804 | Nucks1        | 118 |
| NM_001159351 | Ube2v2        | 118 |
| NM_001197321 | Foxp1         | 118 |
| NM_009688    | Xiap          | 118 |
| NM_024288    | Rmnd5a        | 118 |
| NM_029838    | Col25a1       | 118 |
| NM_173443    | Vcpip1        | 118 |
| NR_037610    | Pafah1b1      | 118 |
| NM_001033633 | Slc2a13       | 117 |
| NM_001081146 | Prickle2      | 117 |
| NM_001109661 | Bach2         | 117 |
| NM_001160370 | A830018L16Rik | 117 |
| NM_007666    | Cdh6          | 117 |
| NM_028821    | Dnalc1        | 117 |
| NM_057172    | Fubp1         | 117 |
| NM_172666    | Agps          | 117 |
| NM_001045513 | Raph1         | 116 |
| NM_001109657 | Gas7          | 116 |
| NM_001168658 | Ccdc127       | 116 |
| NM_008839    | Pik3ca        | 116 |
| NM_010568    | Insr          | 116 |
| NM_010740    | Cd93          | 116 |
| NM_024214    | Tomm20        | 116 |
| NM_025574    | Pigy          | 116 |
| NM_027045    | Gcap14        | 116 |
| NM_027652    | Ept1          | 116 |
| NM_027992    | Tmem106b      | 116 |
| NM_029752    | Bri3bp        | 116 |
| NM_145221    | Appl1         | 116 |

|              |               |     |
|--------------|---------------|-----|
| NM_001001335 | Plekha8       | 115 |
| NM_001034874 | Shisa6        | 115 |
| NM_001081230 | Mtap9         | 115 |
| NM_001100591 | Rc3h2         | 115 |
| NM_001114339 | Pank1         | 115 |
| NM_001170537 | Mef2c         | 115 |
| NM_001172121 | Rbms3         | 115 |
| NM_010408    | Hcn1          | 115 |
| NM_011235    | Rad5113       | 115 |
| NM_026346    | Fbxo32        | 115 |
| NM_027144    | Arhgef12      | 115 |
| NM_029870    | A930001N09Rik | 115 |
| NM_030732    | Tb11xrl       | 115 |
| NM_145997    | Kdm5a         | 115 |
| NM_172471    | Itih5         | 115 |
| NM_172493    | Diap2         | 115 |
| NM_198632    | Trim67        | 115 |
| NR_002847    | Malat1        | 115 |
| NM_001038621 | Rabgap11      | 114 |
| NM_001081227 | 6330403A02Rik | 114 |
| NM_001160229 | Zfp275        | 114 |
| NM_010880    | Ncl           | 114 |
| NM_019827    | Gsk3b         | 114 |
| NM_080793    | Setd7         | 114 |
| NM_173437    | Nav1          | 114 |
| NM_173870    | Mgat4a        | 114 |
| NM_177231    | Arrb1         | 114 |
| NM_177715    | Kctd12        | 114 |
| NR_004429    | Adarb1        | 114 |
| NM_001037136 | Agap1         | 113 |
| NM_001039050 | Pkib          | 113 |
| NM_001077265 | Hnrnpd        | 113 |
| NM_001078167 | Srsf1         | 113 |
| NM_001082485 | Zfp266        | 113 |
| NM_001113211 | Tmem194       | 113 |
| NM_001142411 | Zfp937        | 113 |
| NM_001162950 | Hif3a         | 113 |
| NM_001199105 | Trp53inpl     | 113 |
| NM_010508    | Ifnar1        | 113 |
| NM_026234    | Pigm          | 113 |
| NM_148945    | Rps6ka3       | 113 |
| NM_172467    | Zc3hav11      | 113 |
| NM_173185    | Csnk1g1       | 113 |
| NM_175750    | Plxna4        | 113 |
| NM_176920    | Lrtm1         | 113 |
| NR_003961    | Asb7          | 113 |
| NM_001012477 | Cxc112        | 112 |
| NM_001033331 | Gas213        | 112 |
| NM_001164791 | B230120H23Rik | 112 |
| NM_001177881 | Mfap31        | 112 |
| NM_009158    | Mapk10        | 112 |
| NM_010303    | Gna13         | 112 |
| NM_026343    | Stx17         | 112 |
| NM_138589    | Ubfd1         | 112 |

|              |               |     |
|--------------|---------------|-----|
| NM_175388    | Rnf169        | 112 |
| NM_177239    | Mysml         | 112 |
| NM_177780    | Dock5         | 112 |
| NM_178027    | Vps26b        | 112 |
| NM_178142    | Lcor1         | 112 |
| NM_178764    | Fam168a       | 112 |
| NM_183138    | Tet3          | 112 |
| NM_001025305 | Tcfap2b       | 111 |
| NM_001033361 | Pgr15l        | 111 |
| NM_001039181 | Npr3          | 111 |
| NM_001166456 | Slc38a1       | 111 |
| NM_009231    | Sos1          | 111 |
| NM_010142    | Ephb2         | 111 |
| NM_011062    | Pdpk1         | 111 |
| NM_011273    | Xpr1          | 111 |
| NM_028975    | Tmem33        | 111 |
| NM_031391    | Gtf2a1        | 111 |
| NM_133656    | Crk           | 111 |
| NM_134437    | I117rd        | 111 |
| NM_145100    | Lypd1         | 111 |
| NM_145556    | Tardbp        | 111 |
| NM_172861    | Slc7a14       | 111 |
| NM_173018    | Myo9a         | 111 |
| NM_175164    | Arhgap26      | 111 |
| NM_177357    | Kalrn         | 111 |
| NM_178906    | AI593442      | 111 |
| NR_037569    | 1810026B05Rik | 111 |
| NM_001040131 | Eif4g2        | 110 |
| NM_001044740 | Slc7a2        | 110 |
| NM_001103181 | Tulp4         | 110 |
| NM_001113559 | Sox5          | 110 |
| NM_001160316 | Nfasc         | 110 |
| NM_001165934 | Rgs9          | 110 |
| NM_001177977 | Acsm2         | 110 |
| NM_009754    | Bcl2l11       | 110 |
| NM_019940    | Zfp111        | 110 |
| NM_025921    | 2610002M06Rik | 110 |
| NM_033524    | Spred1        | 110 |
| NM_080466    | Kenn3         | 110 |
| NM_172468    | Snx30         | 110 |
| NM_177694    | Ano5          | 110 |
| NR_015524    | 4932415G12Rik | 110 |
| NM_001031814 | Sng1          | 109 |
| NM_001113417 | Thrb          | 109 |
| NM_001128170 | Cyld          | 109 |
| NM_001164805 | Thsd7a        | 109 |
| NM_001166531 | Sfmbt1        | 109 |
| NM_007831    | Dcc           | 109 |
| NM_009370    | Tgfbr1        | 109 |
| NM_011881    | Grk1          | 109 |
| NM_019743    | Rybp          | 109 |
| NM_028673    | Zdbf2         | 109 |
| NM_172924    | C230081A13Rik | 109 |
| NM_175403    | Mlec          | 109 |



|              |               |     |
|--------------|---------------|-----|
| NM_177089    | Tacc1         | 109 |
| NM_194061    | D630045J12Rik | 109 |
| NM_198105    | Fam120c       | 109 |
| NR_015388    | Dlx6os1       | 109 |
| NM_001033270 | Slc4a7        | 108 |
| NM_001162999 | Fnip2         | 108 |
| NM_001167777 | Asx13         | 108 |
| NM_001190352 | Tmem132b      | 108 |
| NM_008070    | Gabrb2        | 108 |
| NM_008997    | Rab11b        | 108 |
| NM_010485    | Elavl1        | 108 |
| NM_025818    | 1200014J11Rik | 108 |
| NM_053242    | Foxp2         | 108 |
| NM_133917    | Mlxip         | 108 |
| NM_144851    | Senp1         | 108 |
| NM_145151    | Crebzf        | 108 |
| NM_145823    | Pitpnc1       | 108 |
| NM_147219    | Abca5         | 108 |
| NM_170669    | Rps15a        | 108 |
| NM_173030    | Galnt13       | 108 |
| NM_177660    | Zbtb10        | 108 |
| NM_194263    | Tbx20         | 108 |
| NR_027871    | Cts8-ps       | 108 |
| NR_033526    | Gm16523       | 108 |
| NM_001005341 | Ypel2         | 107 |
| NM_001008238 | Bnip2         | 107 |
| NM_001013391 | Cpsf6         | 107 |
| NM_001024955 | Pik3r1        | 107 |
| NM_001039347 | Kcnd3         | 107 |
| NM_001081216 | Phip          | 107 |
| NM_001085507 | Zbtb34        | 107 |
| NM_001109690 | Phf21a        | 107 |
| NM_001130008 | Gspt1         | 107 |
| NM_001162945 | Mtx3          | 107 |
| NM_001172147 | Rbm41         | 107 |
| NM_007513    | Slc7a1        | 107 |
| NM_008636    | Mtf1          | 107 |
| NM_019464    | Sh3glb1       | 107 |
| NM_021284    | Kras          | 107 |
| NM_021366    | Klf13         | 107 |
| NM_023876    | Elp4          | 107 |
| NM_025578    | Mrps25        | 107 |
| NM_026283    | Samd8         | 107 |
| NM_145525    | Osbpl6        | 107 |
| NM_172421    | Asx12         | 107 |
| NR_015459    | 4933431E20Rik | 107 |
| NM_001081135 | Prrg3         | 106 |
| NM_001081221 | Ercc6         | 106 |
| NM_001081326 | Ag1           | 106 |
| NM_001082976 | Tc2n          | 106 |
| NM_001114386 | Nedd41        | 106 |
| NM_001122667 | Mk12          | 106 |
| NM_001128151 | Cecr2         | 106 |
| NM_001168218 | 2310008H09Rik | 106 |

|              |               |     |
|--------------|---------------|-----|
| NM_001195632 | Arhgap32      | 106 |
| NM_009425    | Tnfsf10       | 106 |
| NM_011479    | Sptlc2        | 106 |
| NM_011774    | Slc30a4       | 106 |
| NM_019927    | Arih1         | 106 |
| NM_023624    | Lrat          | 106 |
| NM_025895    | Med28         | 106 |
| NM_027184    | Ipmk          | 106 |
| NM_033560    | Vps37a        | 106 |
| NM_133643    | Edaradd       | 106 |
| NM_177359    | Zfp799        | 106 |
| NM_183262    | Stk35         | 106 |
| NM_198103    | Exoc8         | 106 |
| NM_207653    | Cflar         | 106 |
| NM_001101478 | D3Erttd254e   | 105 |
| NM_001170552 | Krit1         | 105 |
| NM_008441    | Kif1b         | 105 |
| NM_008739    | Nsd1          | 105 |
| NM_011630    | Nr2c2         | 105 |
| NM_019747    | Zfp113        | 105 |
| NM_023526    | Nkiras1       | 105 |
| NM_053099    | Setbp1        | 105 |
| NM_139227    | Atxn7         | 105 |
| NM_153178    | Eif2c2        | 105 |
| NM_177710    | Ssh2          | 105 |
| NM_001005605 | Aebp2         | 104 |
| NM_001025074 | Ntrk2         | 104 |
| NM_001040426 | Thsd4         | 104 |
| NM_001077499 | Scn8a         | 104 |
| NM_001161431 | Slitrk2       | 104 |
| NM_001162926 | Fam84b        | 104 |
| NM_008604    | Mme           | 104 |
| NM_008981    | Ptprg         | 104 |
| NM_011807    | Dlg2          | 104 |
| NM_026177    | 1200011118Rik | 104 |
| NM_028185    | Lsm11         | 104 |
| NM_029928    | Ptprb         | 104 |
| NM_030185    | Zcchc4        | 104 |
| NM_172054    | Txndc9        | 104 |
| NM_178793    | Ccbe1         | 104 |
| NR_033520    | Tmem181b-ps   | 104 |
| NM_001001327 | Vkorc111      | 103 |
| NM_001081164 | Otud4         | 103 |
| NM_001105245 | Pcdh19        | 103 |
| NM_001113532 | Wtap          | 103 |
| NM_001114977 | 2610101N10Rik | 103 |
| NM_001160235 | Fam168b       | 103 |
| NM_001170912 | Trim66        | 103 |
| NM_001184706 | Tfdp2         | 103 |
| NM_001201413 | Apbb2         | 103 |
| NM_008899    | Pou3f2        | 103 |
| NM_009072    | Rock2         | 103 |
| NM_009428    | Trpc5         | 103 |
| NM_009806    | Cask          | 103 |

|              |               |     |
|--------------|---------------|-----|
| NM_018824    | Slc23a2       | 103 |
| NM_019796    | Syncrip       | 103 |
| NM_025558    | Cyb5b         | 103 |
| NM_025617    | 2210012G02Rik | 103 |
| NM_026162    | Plxdc2        | 103 |
| NM_027534    | Kdsr          | 103 |
| NM_028943    | Sgms2         | 103 |
| NM_172684    | Rsbnl         | 103 |
| NM_183028    | Pcmt1         | 103 |
| NR_015479    | C230091D08Rik | 103 |
| NM_001013833 | Prkg1         | 102 |
| NM_001025192 | Cxadr         | 102 |
| NM_001031772 | Lin28b        | 102 |
| NM_001033286 | Slc30a10      | 102 |
| NM_001036684 | Atp2b2        | 102 |
| NM_001039644 | Edem3         | 102 |
| NM_001081304 | Atf6          | 102 |
| NM_001167949 | Atp2b4        | 102 |
| NM_013458    | Add2          | 102 |
| NM_024186    | Ssbp2         | 102 |
| NM_025967    | D16Ert472e    | 102 |
| NM_026886    | Srrm4         | 102 |
| NM_030233    | Saall         | 102 |
| NM_030235    | Avl9          | 102 |
| NM_053255    | Elac1         | 102 |
| NM_053263    | Hnrnpa3       | 102 |
| NM_133352    | Tm9sf3        | 102 |
| NM_138677    | Edem1         | 102 |
| NM_153319    | Amot          | 102 |
| NM_175485    | Prtg          | 102 |
| NM_177129    | Cntn2         | 102 |
| NM_177577    | Dcdc2a        | 102 |
| NM_181401    | Tmem64        | 102 |
| NM_194340    | C330019G07Rik | 102 |
| NR_028381    | B230206F22Rik | 102 |
| NM_001029895 | Atel          | 101 |
| NM_001081237 | Klhdc5        | 101 |
| NM_001114665 | Fnbp11        | 101 |
| NM_001164580 | BC030336      | 101 |
| NM_001177379 | Cpeb2         | 101 |
| NM_001177556 | Gng12         | 101 |
| NM_001198808 | Sfmbt2        | 101 |
| NM_008882    | Plxna2        | 101 |
| NM_009884    | Cebpg         | 101 |
| NM_011077    | Phex          | 101 |
| NM_011845    | Mid2          | 101 |
| NM_020267    | Trim44        | 101 |
| NM_026490    | Mrpl19        | 101 |
| NM_027671    | Sntg1         | 101 |
| NM_027946    | Dcaf7         | 101 |
| NM_029721    | Snx27         | 101 |
| NM_145426    | Mfap3         | 101 |
| NM_172695    | Plaa          | 101 |
| NM_175358    | Zdhhc15       | 101 |

|              |               |     |
|--------------|---------------|-----|
| NM_177186    | Slc35e2       | 101 |
| NM_177343    | Camk1d        | 101 |
| NM_177832    | Zfp236        | 101 |
| NM_212450    | Ctdspl2       | 101 |
| NR_002863    | Emx2os        | 101 |
| NM_001038993 | Rnf38         | 100 |
| NM_001044386 | Zfx           | 100 |
| NM_001083806 | Gria2         | 100 |
| NM_001099328 | Zfp831        | 100 |
| NM_001122759 | Pde7a         | 100 |
| NM_001164274 | Mga           | 100 |
| NM_007937    | Epha5         | 100 |
| NM_007956    | Esrl          | 100 |
| NM_008425    | Kcnj2         | 100 |
| NM_008449    | Kif5c         | 100 |
| NM_010937    | Nras          | 100 |
| NM_013528    | Gfpt1         | 100 |
| NM_023502    | Elf2          | 100 |
| NM_025950    | Cdc3711       | 100 |
| NM_027769    | Cpne3         | 100 |
| NM_028523    | Dcbld2        | 100 |
| NM_030730    | Rad5412       | 100 |
| NM_145512    | Sft2d2        | 100 |
| NM_145930    | AW549877      | 100 |
| NM_175013    | Pgm5          | 100 |
| NM_178607    | Rnf24         | 100 |
| NM_001033347 | D430041D05Rik | 99  |
| NM_001033380 | Itprip12      | 99  |
| NM_001081119 | Abhd13        | 99  |
| NM_001081395 | Amot11        | 99  |
| NM_001113418 | Ppara         | 99  |
| NM_007697    | Ch11          | 99  |
| NM_009183    | St8sia4       | 99  |
| NM_010282    | Ggps1         | 99  |
| NM_011348    | Sema3e        | 99  |
| NM_011632    | Traf3         | 99  |
| NM_011661    | Tyr           | 99  |
| NM_011916    | Xrn1          | 99  |
| NM_011949    | Mapk1         | 99  |
| NM_018814    | Pcnx          | 99  |
| NM_027994    | Cand1         | 99  |
| NM_028894    | Lonrf3        | 99  |
| NM_029001    | Elov17        | 99  |
| NM_175179    | Fam123b       | 99  |
| NM_175429    | Kctd12b       | 99  |
| NM_177766    | Slc35e1       | 99  |
| NR_030708    | 6820431F20Rik | 99  |
| NR_033442    | Orc4          | 99  |
| NM_001033223 | Lin7a         | 98  |
| NM_001080798 | Aff1          | 98  |
| NM_001080927 | Rbpj          | 98  |
| NM_001081064 | Pdzd2         | 98  |
| NM_001101479 | Pabpc41       | 98  |
| NM_001110218 | Ppmlh         | 98  |

|              |               |    |
|--------------|---------------|----|
| NM_001134829 | Lpgat1        | 98 |
| NM_001145920 | Runx2         | 98 |
| NM_001164367 | Rab11fip2     | 98 |
| NM_001170985 | Kirrel        | 98 |
| NM_001191004 | Lsm6          | 98 |
| NM_007726    | Cnr1          | 98 |
| NM_008380    | Inhba         | 98 |
| NM_008829    | Pgr           | 98 |
| NM_009443    | Tgoln1        | 98 |
| NM_009700    | Aqp4          | 98 |
| NM_009741    | Bcl2          | 98 |
| NM_010476    | Hsd17b7       | 98 |
| NM_012027    | Mprip         | 98 |
| NM_016786    | Ube2k         | 98 |
| NM_026696    | 0610030E20Rik | 98 |
| NM_030168    | Rictor        | 98 |
| NM_133236    | Glcc1         | 98 |
| NM_176958    | Hiflan        | 98 |
| NM_177078    | Adrbk2        | 98 |
| NM_183142    | Alg11         | 98 |
| NM_198967    | Tmtc1         | 98 |
| NM_199068    | Foxk1         | 98 |
| NM_001024526 | Larp4         | 97 |
| NM_001025067 | Lrig2         | 97 |
| NM_001025156 | Ccdc93        | 97 |
| NM_001025581 | Kcnc2         | 97 |
| NM_001037725 | Fam117b       | 97 |
| NM_001038619 | Dnm3          | 97 |
| NM_001038625 | Sertad2       | 97 |
| NM_001081105 | Rhoh          | 97 |
| NM_001098171 | Pcdh10        | 97 |
| NM_001122992 | Gmeb1         | 97 |
| NM_001136260 | Slc4a4        | 97 |
| NM_001142746 | Pcdh15        | 97 |
| NM_008123    | Gja8          | 97 |
| NM_008192    | Gucy2e        | 97 |
| NM_008217    | Has3          | 97 |
| NM_008402    | Itgav         | 97 |
| NM_010050    | Dio2          | 97 |
| NM_010193    | Fem1b         | 97 |
| NM_011505    | Stxbp4        | 97 |
| NM_011995    | Pclo          | 97 |
| NM_015753    | Zeb2          | 97 |
| NM_018805    | Hs3st3b1      | 97 |
| NM_020283    | B3galt1       | 97 |
| NM_020608    | Cramp11       | 97 |
| NM_028593    | Cybrd1        | 97 |
| NM_029148    | Tmx4          | 97 |
| NM_029742    | Klhdc10       | 97 |
| NM_029879    | Rgs7bp        | 97 |
| NM_033602    | Peli2         | 97 |
| NM_133975    | Trip12        | 97 |
| NM_138751    | Tmem47        | 97 |
| NM_146234    | Mmgt1         | 97 |

|              |               |    |
|--------------|---------------|----|
| NM_001034867 | Pm20d2        | 96 |
| NM_001038624 | Ric3          | 96 |
| NM_001039060 | Klh115        | 96 |
| NM_001039081 | Mier1         | 96 |
| NM_001081217 | Zfp174        | 96 |
| NM_001081323 | Mphosph9      | 96 |
| NM_001114334 | Rps6kb1       | 96 |
| NM_001170800 | Ipcef1        | 96 |
| NM_001177849 | Asph          | 96 |
| NM_001198571 | Abi2          | 96 |
| NM_008314    | Htr5a         | 96 |
| NM_011086    | Pikfyve       | 96 |
| NM_016810    | Gosr1         | 96 |
| NM_026244    | Slc39a9       | 96 |
| NM_026674    | Aph1c         | 96 |
| NM_153572    | Katnal1       | 96 |
| NM_172530    | She           | 96 |
| NM_173450    | Rpusd2        | 96 |
| NM_175692    | Snhg11        | 96 |
| NM_177364    | Sh3pxd2b      | 96 |
| NM_177371    | Tnfsf15       | 96 |
| NM_177798    | Frs2          | 96 |
| NM_198006    | 6330578E17Rik | 96 |
| NM_198303    | Eif5b         | 96 |
| NM_207633    | Yipf6         | 96 |
| NR_030701    | D430050G20    | 96 |
| NM_001033159 | Zfp597        | 95 |
| NM_001038701 | Gabrb3        | 95 |
| NM_001101471 | Akap5         | 95 |
| NM_001134465 | Fam116a       | 95 |
| NM_001163645 | Osbpl3        | 95 |
| NM_001164504 | Rnf165        | 95 |
| NM_001164565 | Acnat1        | 95 |
| NM_008037    | Fos12         | 95 |
| NM_008098    | Mtpn          | 95 |
| NM_008316    | Hus1          | 95 |
| NM_009128    | Scd2          | 95 |
| NM_009182    | St8sia3       | 95 |
| NM_009424    | Traf6         | 95 |
| NM_010199    | Fgf12         | 95 |
| NM_011462    | Spin1         | 95 |
| NM_011780    | Adam23        | 95 |
| NM_011782    | Adamts5       | 95 |
| NM_018817    | Smarcal1      | 95 |
| NM_026380    | Rgs8          | 95 |
| NM_027326    | Mllt3         | 95 |
| NM_028190    | Luc71         | 95 |
| NM_028447    | Prrc1         | 95 |
| NM_029404    | Phf14         | 95 |
| NM_029607    | 2310003C23Rik | 95 |
| NM_080448    | Srgap3        | 95 |
| NM_172943    | Alkbh5        | 95 |
| NM_175523    | Ppmlk         | 95 |
| NM_177103    | Senp5         | 95 |

|              |               |    |
|--------------|---------------|----|
| NM_177704    | Sytl5         | 95 |
| NM_178707    | Zfp592        | 95 |
| NM_178922    | Hic2          | 95 |
| NM_198300    | Cpeb3         | 95 |
| NR_033514    | 2310015A10Rik | 95 |
| NM_001015046 | Rap1gap2      | 94 |
| NM_001017427 | Rasef         | 94 |
| NM_001038607 | Kcnh1         | 94 |
| NM_001039089 | Sel1l         | 94 |
| NM_001079883 | Bcl11b        | 94 |
| NM_001081324 | Neto2         | 94 |
| NM_001085355 | Arid1b        | 94 |
| NM_001109873 | Cbfa2t3       | 94 |
| NM_001163847 | Tbcd124       | 94 |
| NM_001164562 | Sec22c        | 94 |
| NM_001168624 | C2cd4c        | 94 |
| NM_001170643 | Rnf144b       | 94 |
| NM_001170907 | Trip4         | 94 |
| NM_001199283 | Slc43a2       | 94 |
| NM_007496    | Zfhx3         | 94 |
| NM_007560    | Bmpr1b        | 94 |
| NM_008929    | Dnajc3        | 94 |
| NM_009274    | Srpk2         | 94 |
| NM_010498    | Ids           | 94 |
| NM_011376    | Sim1          | 94 |
| NM_011866    | Pde10a        | 94 |
| NM_013454    | Abca1         | 94 |
| NM_023220    | 2010106G01Rik | 94 |
| NM_025729    | Tab3          | 94 |
| NM_026121    | Bag4          | 94 |
| NM_028148    | Scaf11        | 94 |
| NM_028387    | MacroD2       | 94 |
| NM_028474    | 3110082D06Rik | 94 |
| NM_029057    | Tbcd130       | 94 |
| NM_029436    | Klh124        | 94 |
| NM_029763    | Polr3f        | 94 |
| NM_053103    | Entpd7        | 94 |
| NM_080560    | Ube2n         | 94 |
| NM_173404    | Bmp3          | 94 |
| NM_175331    | Nt5dc3        | 94 |
| NM_178045    | Rassf4        | 94 |
| NM_197940    | Wipf2         | 94 |
| NM_001025438 | Camk2d        | 93 |
| NM_001025602 | I11r11        | 93 |
| NM_001033355 | Zfp568        | 93 |
| NM_001034902 | Gm5878        | 93 |
| NM_001039090 | Skil          | 93 |
| NM_001076681 | 1810012P15Rik | 93 |
| NM_001081071 | Lclat1        | 93 |
| NM_001082483 | Efr3b         | 93 |
| NM_001083312 | Gbp7          | 93 |
| NM_001109757 | Atp7a         | 93 |
| NM_001110827 | Rbfox2        | 93 |
| NM_001111107 | Zfp322a       | 93 |

|              |               |    |
|--------------|---------------|----|
| NM_001111289 | Caprin1       | 93 |
| NM_001159349 | Fyttl1        | 93 |
| NM_001166629 | Dynlt1a       | 93 |
| NM_001168304 | Cdk19         | 93 |
| NM_001177602 | Ak4           | 93 |
| NM_008813    | Enpp1         | 93 |
| NM_009481    | Usp9x         | 93 |
| NM_009677    | Aplg1         | 93 |
| NM_010570    | Irs1          | 93 |
| NM_013598    | Kit1          | 93 |
| NM_018865    | Wispl         | 93 |
| NM_021439    | Chst11        | 93 |
| NM_023217    | Pgpep1        | 93 |
| NM_026140    | Ears2         | 93 |
| NM_028567    | 1700094D03Rik | 93 |
| NM_029669    | Dnajc18       | 93 |
| NM_080640    | Baalc         | 93 |
| NM_133187    | Fam198b       | 93 |
| NM_145840    | Rgs9bp        | 93 |
| NM_172532    | Aldh5a1       | 93 |
| NM_172593    | Mier3         | 93 |
| NM_173413    | Rab8b         | 93 |
| NM_181317    | Kcns2         | 93 |
| NR_029474    | B430319G15Rik | 93 |
| NM_001009818 |               | 92 |
| NM_001015099 | G2e3          | 92 |
| NM_001040611 | Peg10         | 92 |
| NM_001080926 | Lrp8          | 92 |
| NM_001081050 | Pard3b        | 92 |
| NM_001081356 | Vma21         | 92 |
| NM_001085421 | Tspyl5        | 92 |
| NM_001093750 | Ptchd1        | 92 |
| NM_001134457 | Fam55c        | 92 |
| NM_001163567 | Fam102b       | 92 |
| NM_001164503 | Akap11        | 92 |
| NM_001168281 | Wwtr1         | 92 |
| NM_001177995 | Prdm16        | 92 |
| NM_007642    | Cd28          | 92 |
| NM_008514    | Lrp6          | 92 |
| NM_009063    | Rgs5          | 92 |
| NM_009730    | Atrn          | 92 |
| NM_010751    | Mxd1          | 92 |
| NM_013635    | Sypl          | 92 |
| NM_013735    | Trp53bp1      | 92 |
| NM_015769    | Ercc4         | 92 |
| NM_021350    | Chml          | 92 |
| NM_024452    | Luzp1         | 92 |
| NM_026505    | Bambi         | 92 |
| NM_030138    | Acap2         | 92 |
| NM_054043    | Msi2          | 92 |
| NM_134129    | Prpf19        | 92 |
| NM_145506    | Epb4.115      | 92 |
| NM_172884    | 2900026A02Rik | 92 |
| NM_173444    | Nbeal1        | 92 |

11-Sep



|              |               |    |
|--------------|---------------|----|
| NM_174847    | C2cd2         | 92 |
| NM_175211    | Ralgps1       | 92 |
| NM_175459    | Glis3         | 92 |
| NM_177461    | Micall1       | 92 |
| NM_177583    | Aph1b         | 92 |
| NM_178682    | 4933426M11Rik | 92 |
| NM_181348    | Prune2        | 92 |
| NM_182994    | Arl5a         | 92 |
| NM_001033272 | Spata13       | 91 |
| NM_001033399 | Gfod1         | 91 |
| NM_001039094 | Negr1         | 91 |
| NM_001081011 | Srgap2        | 91 |
| NM_001081126 | Gpr161        | 91 |
| NM_001081414 | Grm5          | 91 |
| NM_001085373 | Mcc           | 91 |
| NM_001114332 | Slc16a10      | 91 |
| NM_001122758 | Pcdh7         | 91 |
| NM_001142655 | Arpp19        | 91 |
| NM_001145919 | Ythdf3        | 91 |
| NM_001159361 | Dip2b         | 91 |
| NM_001162537 | 9330159F19Rik | 91 |
| NM_001162903 | 2010109K11Rik | 91 |
| NM_001163145 | 1810041L15Rik | 91 |
| NM_001164639 | Slk           | 91 |
| NM_007917    | Eif4e         | 91 |
| NM_008667    | Nab1          | 91 |
| NM_009823    | Cbfa2t2       | 91 |
| NM_011056    | Pde4d         | 91 |
| NM_011699    | Lin7c         | 91 |
| NM_012000    | Cln8          | 91 |
| NM_013922    | Zfp354c       | 91 |
| NM_024469    | Bhlhe41       | 91 |
| NM_025294    | Gm16515       | 91 |
| NM_026534    | Ubxn2b        | 91 |
| NM_027297    | Prpf4         | 91 |
| NM_027373    | Afap1         | 91 |
| NM_028207    | Dusp3         | 91 |
| NM_080464    | Ppp1r3a       | 91 |
| NM_139306    | Acer2         | 91 |
| NM_172536    | Zfp609        | 91 |
| NM_174998    | Hpcal4        | 91 |
| NM_175111    | Hspbap1       | 91 |
| NM_175518    | D730040F13Rik | 91 |
| NM_205810    | Mrgprb1       | 91 |
| NR_036631    | Zim3          | 91 |
| NM_001014761 | Scn2b         | 90 |
| NM_001039546 | Myo6          | 90 |
| NM_001040459 | Shroom4       | 90 |
| NM_001081473 | Zxdb          | 90 |
| NM_001111021 | Runx1         | 90 |
| NM_001123382 | I11r1         | 90 |
| NM_001159548 | Nr6a1         | 90 |
| NM_001159563 | Orc3          | 90 |
| NM_001163635 | Tnks2         | 90 |

|              |             |    |
|--------------|-------------|----|
| NM_001164275 | Prrgl       | 90 |
| NM_001166030 | Mylk4       | 90 |
| NM_001168622 | Znrf1       | 90 |
| NM_001177956 | Gpm6b       | 90 |
| NM_001195003 | Myst2       | 90 |
| NM_007462    | Apc         | 90 |
| NM_008139    | Gnaq        | 90 |
| NM_008982    | Ptprj       | 90 |
| NM_009738    | Bche        | 90 |
| NM_010078    | Drp2        | 90 |
| NM_010656    | Sspn        | 90 |
| NM_011828    | Hs2st1      | 90 |
| NM_019737    | B4galt6     | 90 |
| NM_021885    | Tub         | 90 |
| NM_027667    | Arhgap19    | 90 |
| NM_028932    | Eaf1        | 90 |
| NM_029348    | Zbtb4       | 90 |
| NM_080288    | Elmo1       | 90 |
| NM_133761    | Dcp1a       | 90 |
| NM_138657    | Socs7       | 90 |
| NM_146006    | Lss         | 90 |
| NM_153082    | Dnajc27     | 90 |
| NM_153403    | Eif2c1      | 90 |
| NM_172516    | Dstyk       | 90 |
| NM_177608    | Secisbp21   | 90 |
| NM_177855    | Med121      | 90 |
| NR_028305    | Tmem181c-ps | 90 |
| NM_001025444 | Aptx        | 89 |
| NM_001029878 | Lonrf2      | 89 |
| NM_001033128 | Bbs1        | 89 |
| NM_001033222 | Pdzd8       | 89 |
| NM_001033536 | Rfx7        | 89 |
| NM_001039371 | Slc22a15    | 89 |
| NM_001110826 | Ddx6        | 89 |
| NM_001111121 | Ccdc6       | 89 |
| NM_001122594 | Phlpp2      | 89 |
| NM_001122989 | Cdc14b      | 89 |
| NM_001163672 | Mapk9       | 89 |
| NM_001168684 | Tmcc3       | 89 |
| NM_001170691 | Elmod2      | 89 |
| NM_001190786 | Ddx19b      | 89 |
| NM_007914    | Ehf         | 89 |
| NM_007964    | Evi5        | 89 |
| NM_008313    | Htr4        | 89 |
| NM_009152    | Sema3a      | 89 |
| NM_009671    | Ankfy1      | 89 |
| NM_009829    | Ccnd2       | 89 |
| NM_013886    | Hdgfrp3     | 89 |
| NM_026165    | Slc25a46    | 89 |
| NM_026252    | Cpeb4       | 89 |
| NM_026482    | Atp2b1      | 89 |
| NM_030706    | Trim2       | 89 |
| NM_033509    | Vangl2      | 89 |
| NM_053009    | Zfp91       | 89 |

|              |               |    |
|--------------|---------------|----|
| NM_053072    | Fgd6          | 89 |
| NM_130450    | Elov16        | 89 |
| NM_139200    | Cytip         | 89 |
| NM_144846    | Fam49b        | 89 |
| NM_172588    | Serinc5       | 89 |
| NM_172621    | Clic5         | 89 |
| NM_173038    | Tbcel         | 89 |
| NM_175460    | Nmnat2        | 89 |
| NM_175501    | Adamts12      | 89 |
| NM_178610    | Krr1          | 89 |
| NM_180974    | Foxn2         | 89 |
| NM_181278    | B230219D22Rik | 89 |
| NM_182839    | Tppp          | 89 |
| NM_201518    | Flrt2         | 89 |
| NR_033635    | 9130019P16Rik | 89 |
| NR_038082    | Six3os1       | 89 |
| NM_001038699 | Fn3k          | 88 |
| NM_001039184 | Cep350        | 88 |
| NM_001081152 | Npat          | 88 |
| NM_001110843 | Cacna2d1      | 88 |
| NM_001145820 | Gpd2          | 88 |
| NM_001166463 | Spoek1        | 88 |
| NM_001177397 | Anks1b        | 88 |
| NM_007764    | Crkl          | 88 |
| NM_008421    | Kcnc1         | 88 |
| NM_008678    | Ncoa2         | 88 |
| NM_009316    | Map3k7        | 88 |
| NM_010441    | Hmga2         | 88 |
| NM_013500    | Hapln1        | 88 |
| NM_020295    | Lmbr1         | 88 |
| NM_022023    | Gmfb          | 88 |
| NM_023844    | Jam2          | 88 |
| NM_025799    | Fuca2         | 88 |
| NM_027143    | Khyn          | 88 |
| NM_027533    | Tspan2        | 88 |
| NM_053204    | Erc1          | 88 |
| NM_054064    | Psg29         | 88 |
| NM_144945    | Lgi2          | 88 |
| NM_145584    | Spon1         | 88 |
| NM_172859    | 6330439K17Rik | 88 |
| NM_177013    | Tmem229a      | 88 |
| NM_177730    | Impad1        | 88 |
| NM_001033238 | Cblb          | 87 |
| NM_001033330 | Frmpd4        | 87 |
| NM_001033348 | Ralgapa2      | 87 |
| NM_001039483 | Tmco1         | 87 |
| NM_001080813 | Rab11fip1     | 87 |
| NM_001081097 | Grik3         | 87 |
| NM_001083967 | Tcf4          | 87 |
| NM_001085549 | Gm12824       | 87 |
| NM_001109992 | Ptpn11        | 87 |
| NM_001122993 | B3galt5       | 87 |
| NM_001142963 | Gm10778       | 87 |
| NM_001161432 | Eda2r         | 87 |

|              |               |    |
|--------------|---------------|----|
| NM_001172068 | Senp8         | 87 |
| NM_007488    | Arnt2         | 87 |
| NM_009592    | Abcb7         | 87 |
| NM_009670    | Ank3          | 87 |
| NM_010192    | Fem1a         | 87 |
| NM_010815    | Grap2         | 87 |
| NM_011074    | Cdk14         | 87 |
| NM_011211    | Ptprd         | 87 |
| NM_011798    | Xcr1          | 87 |
| NM_019680    | Elf4          | 87 |
| NM_020028    | Lpar2         | 87 |
| NM_020252    | Nrxn1         | 87 |
| NM_025697    | 6330409N04Rik | 87 |
| NM_026067    | Eri1          | 87 |
| NM_026484    | Ccny          | 87 |
| NM_029466    | Arl5b         | 87 |
| NM_029705    | Atxn3         | 87 |
| NM_029972    | Ernm          | 87 |
| NM_133922    | Krbal         | 87 |
| NM_170597    | Creg2         | 87 |
| NM_172563    | Hlf           | 87 |
| NM_172866    | Rgp1          | 87 |
| NM_175515    | Intu          | 87 |
| NM_176846    | Exph5         | 87 |
| NM_178267    | Zfp827        | 87 |
| NM_199476    | Rrm2b         | 87 |
| NR_030676    | A130049A11Rik | 87 |
| NR_037865    | Ankrd11       | 87 |
| NM_001001932 | Eea1          | 86 |
| NM_001003915 | Slc5a12       | 86 |
| NM_001004367 | Cxxc4         | 86 |
| NM_001024703 | Mctp2         | 86 |
| NM_001037098 | Nacc2         | 86 |
| NM_001037221 | Samd4         | 86 |
| NM_001037746 | Prps113       | 86 |
| NM_001037923 | Lekr1         | 86 |
| NM_001079844 | Gpc6          | 86 |
| NM_001082414 | Sh3d19        | 86 |
| NM_001103177 | Ablim1        | 86 |
| NM_001114333 | Grm1          | 86 |
| NM_001163780 | Ick           | 86 |
| NM_001164677 | Pdcd6ip       | 86 |
| NM_001166065 | Gent4         | 86 |
| NM_001170953 | Rnmt          | 86 |
| NM_001190984 | Lanc11        | 86 |
| NM_001204912 | 2410017P09Rik | 86 |
| NM_008065    | Gabpa         | 86 |
| NM_009566    | Zfp92         | 86 |
| NM_009579    | Slc30a1       | 86 |
| NM_010141    | Epha7         | 86 |
| NM_010954    | Ncam2         | 86 |
| NM_011595    | Timp3         | 86 |
| NM_013671    | Sod2          | 86 |
| NM_013780    | Npas3         | 86 |

|              |               |    |
|--------------|---------------|----|
| NM_015791    | Fbxo8         | 86 |
| NM_019483    | Smad9         | 86 |
| NM_021377    | Sorcs1        | 86 |
| NM_023750    | Zfp84         | 86 |
| NM_025430    | Mrpl35        | 86 |
| NM_026662    | Prps2         | 86 |
| NM_028572    | Vgl13         | 86 |
| NM_029911    | Kcnk10        | 86 |
| NM_053143    | Pcdhb18       | 86 |
| NM_053268    | Rasa2         | 86 |
| NM_133819    | Ppp1r15b      | 86 |
| NM_144861    | Rprd1a        | 86 |
| NM_145513    | Tipr1         | 86 |
| NM_153055    | Sec63         | 86 |
| NM_153177    | Eif2c4        | 86 |
| NM_153422    | Pde5a         | 86 |
| NM_172821    | Map3k13       | 86 |
| NM_177326    | Pak2          | 86 |
| NM_182997    | Prkab2        | 86 |
| NM_207225    | Hdac4         | 86 |
| NM_207650    | Dtna          | 86 |
| NR_028427    | 5830416P10Rik | 86 |
| NR_033559    | AY512915      | 86 |
| NM_001013028 | AI597468      | 85 |
| NM_001025428 | Spag9         | 85 |
| NM_001025431 | Btbd3         | 85 |
| NM_001033532 | AW554918      | 85 |
| NM_001038604 | Clec5a        | 85 |
| NM_001081049 | M111          | 85 |
| NM_001081086 | Ppig          | 85 |
| NM_001081420 | BC026590      | 85 |
| NM_001081433 | Ankrd44       | 85 |
| NM_001083318 | Etv3          | 85 |
| NM_001093757 | Ogfod1        | 85 |
| NM_001099628 | Atad2b        | 85 |
| NM_001123327 | Qser1         | 85 |
| NM_001146119 | Fam49a        | 85 |
| NM_001167918 | D830031N03Rik | 85 |
| NM_001168562 | Zfp446        | 85 |
| NM_007520    | Bach1         | 85 |
| NM_007569    | Btg1          | 85 |
| NM_008468    | Kpna6         | 85 |
| NM_009682    | Ap3s2         | 85 |
| NM_011083    | Pik3c2a       | 85 |
| NM_011812    | Fbln5         | 85 |
| NM_013674    | Irf4          | 85 |
| NM_016684    | Zscan12       | 85 |
| NM_016780    | Itgb3         | 85 |
| NM_016803    | Chst3         | 85 |
| NM_018864    | Impal         | 85 |
| NM_019972    | Sort1         | 85 |
| NM_021339    | Cdon          | 85 |
| NM_021420    | Stk4          | 85 |
| NM_024282    | Pppde1        | 85 |

|              |                |    |
|--------------|----------------|----|
| NM_027884    | Tns1           | 85 |
| NM_028108    | Naa50          | 85 |
| NM_053089    | Naa15          | 85 |
| NM_133788    | Icmt           | 85 |
| NM_144552    | Stxbp6         | 85 |
| NM_145423    | Slc5a8         | 85 |
| NM_146253    | Zbtb6          | 85 |
| NM_153515    | Ammecr11       | 85 |
| NM_172518    | Fbxo42         | 85 |
| NM_172713    | Sdad1          | 85 |
| NM_173785    | A230051G13Rik  | 85 |
| NM_175255    | Sec24a         | 85 |
| NM_175510    | Unc80          | 85 |
| NM_198616    | Ccdc85b        | 85 |
| NM_199028    | Bend3          | 85 |
| NM_212484    | Cnot6          | 85 |
| NM_001003717 | Osbpl8         | 84 |
| NM_001025245 | Mbp            | 84 |
| NM_001025372 | Adcyap1r1      | 84 |
| NM_001026214 | Entpd5         | 84 |
| NM_001033167 | Slc22a23       | 84 |
| NM_001033422 | Thoc2          | 84 |
| NM_001037987 | Edil3          | 84 |
| NM_001080755 | Zzz3           | 84 |
| NM_001081400 | 1810013L24Rik  | 84 |
| NM_001081409 | Phf2011        | 84 |
| NM_001085440 | Smcr8          | 84 |
| NM_001100116 | 1700047I17Rik2 | 84 |
| NM_001113198 | Mitf           | 84 |
| NM_001142570 | Dach2          | 84 |
| NM_001159889 | Ociad1         | 84 |
| NM_001163419 | Fam172a        | 84 |
| NM_001167939 | Mau2           | 84 |
| NM_008173    | Nr3c1          | 84 |
| NM_008444    | Kif3b          | 84 |
| NM_008775    | Pafah1b2       | 84 |
| NM_010432    | Hipk1          | 84 |
| NM_010636    | Klf12          | 84 |
| NM_011212    | Ptpre          | 84 |
| NM_011858    | Odz4           | 84 |
| NM_018818    | Chm            | 84 |
| NM_025800    | Ppp1r2         | 84 |
| NM_026521    | Zfp706         | 84 |
| NM_028527    | Fam177a        | 84 |
| NM_030266    | Inpp4a         | 84 |
| NM_053141    | Pcdhb16        | 84 |
| NM_153525    | Tmem41b        | 84 |
| NM_173745    | Dusp18         | 84 |
| NM_175310    | Pds5b          | 84 |
| NM_175549    | Robo2          | 84 |
| NM_177282    | Mical2         | 84 |
| NM_177412    | Tmcc1          | 84 |
| NM_178647    | Cggbp1         | 84 |
| NR_002864    | Peg13          | 84 |

|              |               |       |    |
|--------------|---------------|-------|----|
| NR_024329    | 2900097C17Rik |       | 84 |
| NR_027509    | Suv39h2       |       | 84 |
| NR_028416    | D630041G03Rik |       | 84 |
| NR_033221    | BC031361      |       | 84 |
| NM_001001881 | 2510009E07Rik |       | 83 |
| NM_001033149 | Ttc9          |       | 83 |
| NM_001039200 | C230096C10Rik |       | 83 |
| NM_001080780 | Ret           |       | 83 |
| NM_001080932 | Foxk2         |       | 83 |
| NM_001081037 | Srgap1        |       | 83 |
| NM_001081293 | Rprd2         |       | 83 |
| NM_001081348 | Hecw1         |       | 83 |
| NM_001083342 | Ptchd2        |       | 83 |
| NM_001085376 | Pappa2        |       | 83 |
| NM_001109626 | Cdk12         |       | 83 |
| NM_001122675 | Zcche2        |       | 83 |
| NM_001136073 | Nfatc2        |       | 83 |
| NM_001146200 | Pik3cg        |       | 83 |
| NM_001162870 | Spast         |       | 83 |
| NM_001168568 | Ctps2         |       | 83 |
| NM_001205173 | Iffo2         |       | 83 |
| NM_007897    | Ebf1          |       | 83 |
| NM_008130    | Gli3          |       | 83 |
| NM_010611    | Kcnq2         |       | 83 |
| NM_013924    | Abt1          |       | 83 |
| NM_015737    | Galnt4        |       | 83 |
| NM_016775    | Dnajc5        |       | 83 |
| NM_019697    | Kcnd2         |       | 83 |
| NM_020610    | Nrip3         |       | 83 |
| NM_020621    | P2ry4         |       | 83 |
| NM_027920    |               | 8-Mar | 83 |
| NM_029332    | Akap13        |       | 83 |
| NM_030557    | Mynn          |       | 83 |
| NM_033562    | Der12         |       | 83 |
| NM_139150    | Carf          |       | 83 |
| NM_144874    | Cox15         |       | 83 |
| NM_145436    | Cdc27         |       | 83 |
| NM_152825    | Usp45         |       | 83 |
| NM_153091    | St71          |       | 83 |
| NM_153134    | Irgq          |       | 83 |
| NM_172413    | Rap2c         |       | 83 |
| NM_173439    | Fbxo45        |       | 83 |
| NM_173781    | Rab6b         |       | 83 |
| NM_175400    | Sephs1        |       | 83 |
| NM_183208    | Zmiz1         |       | 83 |
| NR_027492    | Hspa13        |       | 83 |
| NR_028391    | BB031773      |       | 83 |
| NM_001001985 | Nat81         |       | 82 |
| NM_001008542 | Mxil          |       | 82 |
| NM_001033253 | Plekhg1       |       | 82 |
| NM_001039472 | Kif21b        |       | 82 |
| NM_001040396 | 2810407C02Rik |       | 82 |
| NM_001113514 | Itga9         |       | 82 |
| NM_001162375 | Fam73a        |       | 82 |

|              |               |       |    |
|--------------|---------------|-------|----|
| NM_001162921 | Zc3h12c       |       | 82 |
| NM_001165948 | Pogz          |       | 82 |
| NM_007442    | Alx4          |       | 82 |
| NM_007711    | Clcn3         |       | 82 |
| NM_008443    | Kif3a         |       | 82 |
| NM_008857    | Prkci         |       | 82 |
| NM_009209    | Slc6a2        |       | 82 |
| NM_010266    | Gda           |       | 82 |
| NM_013827    | Mtf2          |       | 82 |
| NM_018736    | Mrell1a       |       | 82 |
| NM_018801    | Syt7          |       | 82 |
| NM_018807    | Plagl2        |       | 82 |
| NM_019788    | Pldn          |       | 82 |
| NM_021449    | Crbn          |       | 82 |
| NM_025780    | Thap2         |       | 82 |
| NM_026775    | Tmed10        |       | 82 |
| NM_027412    | Ttc9c         |       | 82 |
| NM_027642    | Phf6          |       | 82 |
| NM_028623    | Cst6          |       | 82 |
| NM_028882    | Sema3d        |       | 82 |
| NM_028995    | Nipal3        |       | 82 |
| NM_029498    | Zmym2         |       | 82 |
| NM_138650    | Dgkg          |       | 82 |
| NM_145415    | Diexf         |       | 82 |
| NM_172606    |               | 6-Mar | 82 |
| NM_172665    | Pdk1          |       | 82 |
| NM_173780    | Klf8          |       | 82 |
| NM_175312    | B630005N14Rik |       | 82 |
| NM_176972    | Usp37         |       | 82 |
| NM_177304    | Enpp6         |       | 82 |
| NM_177794    | Tmem26        |       | 82 |
| NM_177906    | Opcml         |       | 82 |
| NM_178617    | Necab1        |       | 82 |
| NM_178753    | Spin4         |       | 82 |
| NM_178897    | Tyw1          |       | 82 |
| NM_198295    | Tmx3          |       | 82 |
| NR_028259    | 4932414J04Rik |       | 82 |
| NR_037617    | St5           |       | 82 |
| NR_037691    | Gm4776        |       | 82 |
| NM_001001986 | 8430427H17Rik |       | 81 |
| NM_001008420 | Cdh12         |       | 81 |
| NM_001008785 | Kbtbd8        |       | 81 |
| NM_001039080 | Rbms2         |       | 81 |
| NM_001077202 | Hs6st2        |       | 81 |
| NM_001081111 | Tmf1          |       | 81 |
| NM_001081191 | Em15          |       | 81 |
| NM_001081656 | Neur11b       |       | 81 |
| NM_001113414 | Ebf3          |       | 81 |
| NM_001135577 | BC024659      |       | 81 |
| NM_001136484 | Gcnt1         |       | 81 |
| NM_001162941 | Mapre2        |       | 81 |
| NM_001166553 | Rnf145        |       | 81 |
| NM_001170401 | Tmem229b      |       | 81 |
| NM_001170849 | Luc712        |       | 81 |



|              |               |    |
|--------------|---------------|----|
| NM_001205331 | Mtap4         | 81 |
| NM_008415    | Jrk           | 81 |
| NM_009027    | Rasgrf2       | 81 |
| NM_009624    | Adcy9         | 81 |
| NM_010272    | Gdf11         | 81 |
| NM_010956    | Ogdh          | 81 |
| NM_011294    | Sub1          | 81 |
| NM_011785    | Akt3          | 81 |
| NM_019579    | Mpp5          | 81 |
| NM_019637    | Styx          | 81 |
| NM_021323    | Usp29         | 81 |
| NM_023371    | Pin1          | 81 |
| NM_023403    | Mesdc2        | 81 |
| NM_028731    | Esyt2         | 81 |
| NM_029116    | Kbtbd11       | 81 |
| NM_029512    | Ttpal         | 81 |
| NM_029965    | Rnf170        | 81 |
| NM_144937    | Usp3          | 81 |
| NM_144944    | Prokr2        | 81 |
| NM_172600    | 6720456H20Rik | 81 |
| NM_175121    | Slc38a2       | 81 |
| NM_177351    | Agphd1        | 81 |
| NM_178005    | Lrrtm2        | 81 |
| NM_178719    | Smcr71        | 81 |
| NR_033550    | Gm10248       | 81 |
| NR_033647    | Mageb16-ps1   | 81 |
| NR_038020    | LOC100504235  | 81 |
| NM_001013753 | Pcdh17        | 80 |
| NM_001013786 | Zfp187        | 80 |
| NM_001033251 | Gpr174        | 80 |
| NM_001039388 | Wdr37         | 80 |
| NM_001039484 | Kcnj10        | 80 |
| NM_001042659 | Fzd5          | 80 |
| NM_001079849 | Paip1         | 80 |
| NM_001080769 | Uhrflbp1      | 80 |
| NM_001081101 | 4933407H18Rik | 80 |
| NM_001081165 | Fam26d        | 80 |
| NM_001081977 | Rnf144a       | 80 |
| NM_001135151 | Slc39a14      | 80 |
| NM_001163630 | Satb1         | 80 |
| NM_001164222 | Col4a3bp      | 80 |
| NM_001164423 | Pq1c1         | 80 |
| NM_001177464 | Zfp516        | 80 |
| NM_001199360 | Tmem164       | 80 |
| NM_001204371 | Oprk1         | 80 |
| NM_009019    | Rag1          | 80 |
| NM_009030    | Rbbp4         | 80 |
| NM_009790    | Calml         | 80 |
| NM_011104    | Prkce         | 80 |
| NM_011945    | Map3k1        | 80 |
| NM_013696    | Trhr          | 80 |
| NM_018732    | Scn3a         | 80 |
| NM_022723    | Scube1        | 80 |
| NM_023500    | Xk            | 80 |

|              |               |    |
|--------------|---------------|----|
| NM_028763    | Cbx6          | 80 |
| NM_052976    | Ophn1         | 80 |
| NM_053090    | Fam126a       | 80 |
| NM_133818    | AI597479      | 80 |
| NM_145469    | Nipal2        | 80 |
| NM_146001    | Hip1          | 80 |
| NM_153543    | Aldh112       | 80 |
| NM_173422    | Colec10       | 80 |
| NM_175258    | Rapgef6       | 80 |
| NM_177092    | Msr3          | 80 |
| NM_178309    | Brip1         | 80 |
| NM_178684    | Mapk11        | 80 |
| NM_178691    | Yod1          | 80 |
| NM_178772    | Nceh1         | 80 |
| NR_027643    | 4932435022Rik | 80 |
| NM_001037758 | Btrc          | 79 |
| NM_001038592 | Glr2          | 79 |
| NM_001039934 | Mtap2         | 79 |
| NM_001100458 | Fam169a       | 79 |
| NM_001110013 | Tmtc3         | 79 |
| NM_001166033 | Gtf3c4        | 79 |
| NM_001166645 | Zfp882        | 79 |
| NM_001177753 | Pfkfb3        | 79 |
| NM_001177883 | Elavl2        | 79 |
| NM_001193303 | Lims1         | 79 |
| NM_007396    | Acvr2a        | 79 |
| NM_007646    | Cd38          | 79 |
| NM_008078    | Gad2          | 79 |
| NM_008364    | I1rap         | 79 |
| NM_008367    | I12ra         | 79 |
| NM_008395    | Itch          | 79 |
| NM_008957    | Ptch1         | 79 |
| NM_009230    | Soat1         | 79 |
| NM_010307    | Gnal          | 79 |
| NM_011743    | Zfp106        | 79 |
| NM_017467    | Zfp316        | 79 |
| NM_019681    | Ncs1          | 79 |
| NM_022980    | Rcan3         | 79 |
| NM_026147    | Rps20         | 79 |
| NM_026579    | D10Wsu102e    | 79 |
| NM_027060    | Btbd9         | 79 |
| NM_027462    | Wars2         | 79 |
| NM_028493    | Rhobtb3       | 79 |
| NM_028664    | Ankrd45       | 79 |
| NM_028945    | D14Abbl1e     | 79 |
| NM_030250    | Nus1          | 79 |
| NM_030886    | Ankrd17       | 79 |
| NM_147100    | Olf613        | 79 |
| NM_172406    | Trak2         | 79 |
| NM_172865    | Manea         | 79 |
| NM_173364    | Zfp445        | 79 |
| NM_174848    | Crybg3        | 79 |
| NM_175251    | Arid2         | 79 |
| NM_175445    | Rassf2        | 79 |

|              |               |    |
|--------------|---------------|----|
| NM_175643    | Adamts2       | 79 |
| NM_177034    | Apbal         | 79 |
| NM_177167    | Ppm1e         | 79 |
| NM_178118    | Dixdc1        | 79 |
| NM_178599    | Commd8        | 79 |
| NM_178804    | Slit2         | 79 |
| NM_199025    | Zbtb26        | 79 |
| NR_003617    | 1700018B24Rik | 79 |
| NR_015589    | 9330158H04Rik | 79 |
| NR_027502    | Zc3h7a        | 79 |
| NR_028266    | BC037032      | 79 |
| NR_028353    | Nt5c2         | 79 |
| NM_001001495 | Tnip3         | 78 |
| NM_001013387 | Zfp182        | 78 |
| NM_001013777 | Zfp488        | 78 |
| NM_001025594 | Zbtb43        | 78 |
| NM_001037759 | Sgk3          | 78 |
| NM_001039551 | Cnmn3         | 78 |
| NM_001081242 | Tln2          | 78 |
| NM_001081963 | 9430020K01Rik | 78 |
| NM_001114663 | Plc11         | 78 |
| NM_001142939 | AK010878      | 78 |
| NM_001160262 | Fam78b        | 78 |
| NM_001163144 | Pcsk5         | 78 |
| NM_001163455 | Tbck          | 78 |
| NM_001163760 | 6430548M08Rik | 78 |
| NM_001166661 | Ccdc85a       | 78 |
| NM_001190852 | Pdlim5        | 78 |
| NM_007525    | Bard1         | 78 |
| NM_007567    | Bsn           | 78 |
| NM_008445    | Kif3c         | 78 |
| NM_008651    | Myb11         | 78 |
| NM_008901    | Pou3f4        | 78 |
| NM_009177    | St3gal1       | 78 |
| NM_009761    | Bnip3l        | 78 |
| NM_009946    | Cplx2         | 78 |
| NM_010095    | Ebf2          | 78 |
| NM_011207    | Ptpn3         | 78 |
| NM_011898    | Spry4         | 78 |
| NM_020007    | Mbn11         | 78 |
| NM_023053    | Twsg1         | 78 |
| NM_023651    | Pex13         | 78 |
| NM_025670    | 5730403B10Rik | 78 |
| NM_025773    | Ube2w         | 78 |
| NM_026057    | Zfp422        | 78 |
| NM_028130    | Zfp157        | 78 |
| NM_028791    | Ftsjd2        | 78 |
| NM_029839    | Trub1         | 78 |
| NM_054051    | Pip4k2b       | 78 |
| NM_054088    | Pnpla3        | 78 |
| NM_134048    | Cb111         | 78 |
| NM_144902    | Slc35a3       | 78 |
| NM_172441    | Shroom2       | 78 |
| NM_172507    | Sh3bgr12      | 78 |

|              |               |    |
|--------------|---------------|----|
| NM_172843    | Tor1aip2      | 78 |
| NM_174876    | Impg2         | 78 |
| NM_175115    | Ikzf5         | 78 |
| NM_175127    | Fbxo28        | 78 |
| NM_175341    | Mbnl2         | 78 |
| NM_177139    | Lypd6         | 78 |
| NM_177852    | Didol         | 78 |
| NM_178111    | Trp53inp2     | 78 |
| NM_178705    | Luzp2         | 78 |
| NM_181585    | Pik3r3        | 78 |
| NM_194334    | Tbc1d2b       | 78 |
| NM_198035    | Zbtb39        | 78 |
| NM_199016    | Enpp4         | 78 |
| NR_002849    | 8430431K14Rik | 78 |
| NR_015600    | A230072E10Rik | 78 |
| NR_036602    | 4933421010Rik | 78 |
| NM_001007574 | A830010M20Rik | 77 |
| NM_001014973 | Snx13         | 77 |
| NM_001025600 | Cadm1         | 77 |
| NM_001038651 | Zfp953        | 77 |
| NM_001039188 | Rreb1         | 77 |
| NM_001080924 | Znrf3         | 77 |
| NM_001081360 | Camsap111     | 77 |
| NM_001081453 | Nin           | 77 |
| NM_001110254 | Zfp945        | 77 |
| NM_001160139 | Kcnq5         | 77 |
| NM_001160219 | Pum2          | 77 |
| NM_001161763 | Fmo5          | 77 |
| NM_001163007 | Tnik          | 77 |
| NM_001163741 | 1110021J02Rik | 77 |
| NM_001164078 | Tia1          | 77 |
| NM_001164787 | Sprrr2a2      | 77 |
| NM_001166365 | Fam122b       | 77 |
| NM_001171000 | Ahcy12        | 77 |
| NM_001177845 | Tirap         | 77 |
| NM_007734    | Col4a3        | 77 |
| NM_008634    | Mtap1b        | 77 |
| NM_008688    | Nfic          | 77 |
| NM_008712    | Nos1          | 77 |
| NM_010197    | Fgf1          | 77 |
| NM_010299    | Gm2a          | 77 |
| NM_010414    | Htt           | 77 |
| NM_010690    | Lats1         | 77 |
| NM_010926    | Cox4nb        | 77 |
| NM_010928    | Notch2        | 77 |
| NM_011127    | Prrx1         | 77 |
| NM_011341    | Sdf4          | 77 |
| NM_011468    | Sprrr2a1      | 77 |
| NM_011610    | Tnfrsf1b      | 77 |
| NM_011890    | Sgcb          | 77 |
| NM_015774    | Ero11         | 77 |
| NM_016856    | Cpsf2         | 77 |
| NM_018829    | Ap3m1         | 77 |
| NM_019989    | Sh3bgr1       | 77 |

|              |               |    |
|--------------|---------------|----|
| NM_020558    | C1d           | 77 |
| NM_023587    | Ptplb         | 77 |
| NM_023680    | Tnfrsf22      | 77 |
| NM_027007    | Zfp397        | 77 |
| NM_028829    | Paqr8         | 77 |
| NM_172585    | Larp4b        | 77 |
| NM_172856    | Lass6         | 77 |
| NM_173740    | Maoa          | 77 |
| NM_175032    | Galnt16       | 77 |
| NM_175199    | Hspa12a       | 77 |
| NM_175389    | Rg9mtd2       | 77 |
| NM_175535    | Arhgap20      | 77 |
| NM_176959    | Fbxl7         | 77 |
| NM_177082    | Sp8           | 77 |
| NM_177546    | Pcytlb        | 77 |
| NM_177664    | D3Bwg0562e    | 77 |
| NM_178918    | Utp15         | 77 |
| NM_181070    | Rab18         | 77 |
| NR_015505    | 6720401G13Rik | 77 |
| NR_015552    | 5330434G04Rik | 77 |
| NR_027352    | Vash2         | 77 |
| NR_027704    | Svip          | 77 |
| NR_033402    | Tyms          | 77 |
| NR_033549    | Gm11190       | 77 |
| NM_001004361 | 5730494M16Rik | 76 |
| NM_001033178 | Tmem181a      | 76 |
| NM_001033329 | Arhgef9       | 76 |
| NM_001033713 | Mef2a         | 76 |
| NM_001039088 | Seh1l         | 76 |
| NM_001039150 | Cd44          | 76 |
| NM_001048267 | Tnpo1         | 76 |
| NM_001081079 | Ogfrl1        | 76 |
| NM_001081178 | Gpr116        | 76 |
| NM_001081557 | Camta1        | 76 |
| NM_001128094 | Atp13a3       | 76 |
| NM_001163501 | C130039016Rik | 76 |
| NM_001163794 | Pdik1l        | 76 |
| NM_001169576 | Ube2h         | 76 |
| NM_001205204 | Astn1         | 76 |
| NM_007908    | Eef2k         | 76 |
| NM_008466    | Kpna3         | 76 |
| NM_009577    | Zik1          | 76 |
| NM_009593    | Abcg1         | 76 |
| NM_009655    | Alcam         | 76 |
| NM_009924    | Cnr2          | 76 |
| NM_010688    | Laspl         | 76 |
| NM_011384    | Six6          | 76 |
| NM_011584    | Nr1d2         | 76 |
| NM_011638    | Tfrc          | 76 |
| NM_011889    |               | 76 |
| NM_013784    | Pign          | 76 |
| NM_013885    | Clic4         | 76 |
| NM_015804    | Atp11a        | 76 |
| NM_015812    | Rgs6          | 76 |

3-Sep

|              |               |    |
|--------------|---------------|----|
| NM_016714    | Nup50         | 76 |
| NM_019820    | Cbln3         | 76 |
| NM_025937    | Nkap          | 76 |
| NM_028712    | Rap2b         | 76 |
| NM_029492    | Zdhhc20       | 76 |
| NM_029701    | Spcs3         | 76 |
| NM_053085    | Tcf23         | 76 |
| NM_080463    | Pofut1        | 76 |
| NM_138648    | Olr1          | 76 |
| NM_139311    | Mllt6         | 76 |
| NM_145491    | Rhoq          | 76 |
| NM_145824    | Ranbp10       | 76 |
| NM_146241    | Trhde         | 76 |
| NM_153155    | Clql3         | 76 |
| NM_172482    | Zfp719        | 76 |
| NM_172509    | Kctd7         | 76 |
| NM_172780    | Slc9a6        | 76 |
| NM_172870    | Bnc2          | 76 |
| NM_175090    | Slc31a1       | 76 |
| NM_175206    | Fbx122        | 76 |
| NM_177164    | Vwc21         | 76 |
| NM_178756    | E130309F12Rik | 76 |
| NM_198111    | Akap6         | 76 |
| NR_015560    | 2610028E06Rik | 76 |
| NR_030669    | 1700034H15Rik | 76 |
| NR_038006    | 9630028B13Rik | 76 |
| NM_001004293 | Amigo1        | 75 |
| NM_001025382 | Fam196b       | 75 |
| NM_001025597 | Ikzf1         | 75 |
| NM_001033385 | D630037F22Rik | 75 |
| NM_001033525 | Kcnk6         | 75 |
| NM_001079513 | Zbtb33        | 75 |
| NM_001083628 | Greb11        | 75 |
| NM_001163024 | Mon2          | 75 |
| NM_001164167 | Pias2         | 75 |
| NM_001164411 | Cnot4         | 75 |
| NM_001164493 | Klhl29        | 75 |
| NM_001177658 | Mrpl15        | 75 |
| NM_001190409 | Magt1         | 75 |
| NM_008538    | Mareks        | 75 |
| NM_009196    | Slc16a1       | 75 |
| NM_009758    | Bmpr1a        | 75 |
| NM_010049    | Dhfr          | 75 |
| NM_010178    | Srsf10        | 75 |
| NM_010917    | Nid1          | 75 |
| NM_021384    | Rsad2         | 75 |
| NM_023815    | Trp53rk       | 75 |
| NM_025456    | Eapp          | 75 |
| NM_025823    | Pcyox1        | 75 |
| NM_026742    | Ndufaf4       | 75 |
| NM_027434    | Rprd1b        | 75 |
| NM_027454    | Chrn3         | 75 |
| NM_028973    | Lrrc15        | 75 |
| NM_029407    | 4933432B09Rik | 75 |

|              |               |    |
|--------------|---------------|----|
| NM_029654    | Atg2b         | 75 |
| NM_133690    | Atp1b4        | 75 |
| NM_145413    | Fam20b        | 75 |
| NM_145520    | Trub2         | 75 |
| NM_148948    | Dicer1        | 75 |
| NM_153587    | Rps6ka5       | 75 |
| NM_172271    | Slc6a17       | 75 |
| NM_172424    | Med13l        | 75 |
| NM_173431    | Rpgrip1l      | 75 |
| NM_173772    | Neu4          | 75 |
| NM_176971    | Rab9b         | 75 |
| NM_177330    | Ghsr          | 75 |
| NM_178608    | Reep1         | 75 |
| NM_178715    | Tmem30b       | 75 |
| NM_183224    | Fam19a3       | 75 |
| NM_183312    | Synm          | 75 |
| NM_212433    | Fbxo3         | 75 |
| NR_015467    | 5530601H04Rik | 75 |
| NR_027618    | Vps39         | 75 |
| NR_028392    | Tsr2          | 75 |
| NR_030709    | Gm16386       | 75 |
| NM_001004151 | Rtp1          | 74 |
| NM_001005419 | Ado           | 74 |
| NM_001006664 | Epb4.111      | 74 |
| NM_001024139 | Adamts15      | 74 |
| NM_001024927 | Pitpnm3       | 74 |
| NM_001025565 | Lhx9          | 74 |
| NM_001033191 | Naa11         | 74 |
| NM_001033988 | Ncoa4         | 74 |
| NM_001038589 | Usp14         | 74 |
| NM_001038637 | Gng2          | 74 |
| NM_001038642 | Ets1          | 74 |
| NM_001039106 | Ddhd1         | 74 |
| NM_001039394 | Rab43         | 74 |
| NM_001042752 | Neol          | 74 |
| NM_001044747 | Zfp68         | 74 |
| NM_001080794 | G3bp2         | 74 |
| NM_001081109 | Lmtk2         | 74 |
| NM_001081287 | Mpp7          | 74 |
| NM_001110196 | Rnf146        | 74 |
| NM_001113389 | Dyrk1a        | 74 |
| NM_001113470 | Ctdsp2        | 74 |
| NM_001159572 | 4632428N05Rik | 74 |
| NM_001160359 | A130010J15Rik | 74 |
| NM_001161618 | Cul5          | 74 |
| NM_001162477 | Gab2          | 74 |
| NM_001164198 | Prkacb        | 74 |
| NM_001164533 | Dap3          | 74 |
| NM_001177943 | Eda           | 74 |
| NM_001190332 | Frmd7         | 74 |
| NM_001198587 | Nrxn3         | 74 |
| NM_007644    | Scarb2        | 74 |
| NM_007961    | Etv6          | 74 |
| NM_008002    | Fgf10         | 74 |

|              |               |    |
|--------------|---------------|----|
| NM_008730    | Nptx1         | 74 |
| NM_009181    | St8sia2       | 74 |
| NM_009546    | Trim25        | 74 |
| NM_010728    | Lox           | 74 |
| NM_010795    | Mgat3         | 74 |
| NM_011763    | Zfp9          | 74 |
| NM_019632    | Napb          | 74 |
| NM_023043    | Prnd          | 74 |
| NM_023596    | Slc29a3       | 74 |
| NM_026200    | Kcnv1         | 74 |
| NM_026275    | Ube2r2        | 74 |
| NM_027643    | Naa40         | 74 |
| NM_029896    | Wdr82         | 74 |
| NM_033567    | Cecr6         | 74 |
| NM_133704    | Sec22a        | 74 |
| NM_138313    | Bmf           | 74 |
| NM_172653    | Slc39a10      | 74 |
| NM_173182    | Fndc3b        | 74 |
| NM_173753    | Fnip1         | 74 |
| NM_175498    | Pnma2         | 74 |
| NM_177739    | Zfp507        | 74 |
| NM_194341    | Synrg         | 74 |
| NM_198899    | Uggt1         | 74 |
| NM_203507    | Rwdd4a        | 74 |
| NM_207668    | Acpp          | 74 |
| NR_015540    | 4933400F21Rik | 74 |
| NR_037997    | 2310015D24Rik | 74 |
| NM_001001309 | Itga8         | 73 |
| NM_001001984 | Kdm2a         | 73 |
| NM_001013761 | Gm606         | 73 |
| NM_001039056 | Kcnj15        | 73 |
| NM_001040695 | Uevld         | 73 |
| NM_001081056 | Xpot          | 73 |
| NM_001081057 | Tecpr2        | 73 |
| NM_001085492 | Rere          | 73 |
| NM_001101433 | Zcche24       | 73 |
| NM_001128103 | Ano3          | 73 |
| NM_001130412 | Lpin1         | 73 |
| NM_001134426 | Cdv3          | 73 |
| NM_001142965 | 6430704M03Rik | 73 |
| NM_001145824 | Hipk3         | 73 |
| NM_001146298 | Wac           | 73 |
| NM_001164401 | Ptpro         | 73 |
| NM_001168477 | Ttc23         | 73 |
| NM_001199272 | Gopc          | 73 |
| NM_007478    | Arf3          | 73 |
| NM_007808    | Cycs          | 73 |
| NM_007882    | Dsc3          | 73 |
| NM_007950    | Ereg          | 73 |
| NM_008306    | Ndst1         | 73 |
| NM_008465    | Kpna1         | 73 |
| NM_008569    | Anapc1        | 73 |
| NM_009306    | Syt1          | 73 |
| NM_009530    | Atrx          | 73 |



|              |               |    |
|--------------|---------------|----|
| NM_009616    | Adam19        | 73 |
| NM_010015    | Dad1          | 73 |
| NM_010201    | Fgf14         | 73 |
| NM_010267    | Gdap1         | 73 |
| NM_010367    | Mag1          | 73 |
| NM_011027    | P2rx7         | 73 |
| NM_011246    | Rasgrp1       | 73 |
| NM_011382    | Six4          | 73 |
| NM_013723    | Podxl         | 73 |
| NM_016676    | Rab10         | 73 |
| NM_016703    | Preb          | 73 |
| NM_016851    | Irf6          | 73 |
| NM_018871    | Ywhag         | 73 |
| NM_022655    | Ireb2         | 73 |
| NM_022887    | Tsc1          | 73 |
| NM_025299    | Txn14a        | 73 |
| NM_025454    | Ing5          | 73 |
| NM_025809    | Clec14a       | 73 |
| NM_025872    | Golt1b        | 73 |
| NM_026887    | Ap1s2         | 73 |
| NM_027405    | 1700020003Rik | 73 |
| NM_027453    | Btf314        | 73 |
| NM_027491    | Rragd         | 73 |
| NM_028127    | Frmd6         | 73 |
| NM_028614    | Ppp2r1b       | 73 |
| NM_030203    | Tspyl4        | 73 |
| NM_030563    | N4bp1         | 73 |
| NM_031169    | Kcnmb1        | 73 |
| NM_133710    | Ctdspl        | 73 |
| NM_145933    | St6gal1       | 73 |
| NM_147176    | Homer1        | 73 |
| NM_172626    | Rbm27         | 73 |
| NM_172707    | Ppp1cb        | 73 |
| NM_172827    | Lnpep         | 73 |
| NM_172939    | Ankrd57       | 73 |
| NM_173368    | Chd6          | 73 |
| NM_173868    | St18          | 73 |
| NM_177914    | Dgkk          | 73 |
| NM_178280    | Sall3         | 73 |
| NM_178679    | Zfp365        | 73 |
| NM_178728    | Napepld       | 73 |
| NM_181649    | Ccdc75        | 73 |
| NM_201411    | Flrt1         | 73 |
| NR_027957    | Ppp4r11-ps    | 73 |
| NR_029381    | 5330413P13Rik | 73 |
| NR_033535    | Gm10845       | 73 |
| NR_033546    | Gm15348       | 73 |
| NM_001004357 | Cntnap2       | 72 |
| NM_001009949 | Mcart1        | 72 |
| NM_001013380 | Dync11i2      | 72 |
| NM_001029836 | Npnt          | 72 |
| NM_001033324 | Zbtb16        | 72 |
| NM_001035532 | Akap2         | 72 |
| NM_001039692 | Arhgap12      | 72 |

|              |               |    |
|--------------|---------------|----|
| NM_001045515 | Synj1         | 72 |
| NM_001081204 | B3galt1       | 72 |
| NM_001081971 | Gm1337        | 72 |
| NM_001110203 | Trim9         | 72 |
| NM_001113383 | Gls           | 72 |
| NM_001145937 | Odz3          | 72 |
| NM_001160378 | Fam46a        | 72 |
| NM_001162896 | 4930523C07Rik | 72 |
| NM_001162932 | A630055G03Rik | 72 |
| NM_001163159 | Pcyt1a        | 72 |
| NM_001163539 | 5430427019Rik | 72 |
| NM_001163754 | Rab3gap2      | 72 |
| NM_001164531 | Zfyve27       | 72 |
| NM_001166457 | Brcc3         | 72 |
| NM_001167883 | Ankrd50       | 72 |
| NM_008448    | Kif5b         | 72 |
| NM_008455    | Klkb1         | 72 |
| NM_008862    | Pkia          | 72 |
| NM_009127    | Scd1          | 72 |
| NM_009320    | Slc6a6        | 72 |
| NM_009360    | Tfam          | 72 |
| NM_009399    | Tnfrsf11a     | 72 |
| NM_009602    | Chrn2         | 72 |
| NM_009779    | C3ar1         | 72 |
| NM_010109    | Efna5         | 72 |
| NM_010572    | Irs4          | 72 |
| NM_011438    | Sox12         | 72 |
| NM_013568    | Kcna6         | 72 |
| NM_013920    | Hnf4g         | 72 |
| NM_017376    | Tef           | 72 |
| NM_018763    | Chst2         | 72 |
| NM_018782    | Calcr1        | 72 |
| NM_021381    | Prokr1        | 72 |
| NM_023814    | Tbx18         | 72 |
| NM_025626    | Fam107b       | 72 |
| NM_028372    | Mblac2        | 72 |
| NM_029788    | Rnft1         | 72 |
| NM_031199    | Tgfa          | 72 |
| NM_080708    | Bmp2k         | 72 |
| NM_080847    | Asb15         | 72 |
| NM_133669    | Rp2h          | 72 |
| NM_133766    | Efr3a         | 72 |
| NM_134012    | Mbtd1         | 72 |
| NM_145509    | 5430435G22Rik | 72 |
| NM_146698    | Olfir1443     | 72 |
| NM_153119    | Plekho2       | 72 |
| NM_153413    | Dock3         | 72 |
| NM_153600    | Ttc26         | 72 |
| NM_153774    | Ipo9          | 72 |
| NM_172443    | Tbc1d16       | 72 |
| NM_172839    | Ccnj          | 72 |
| NM_172937    | Shprh         | 72 |
| NM_175212    | Tmem65        | 72 |
| NM_175563    | Prr11         | 72 |

|              |               |    |
|--------------|---------------|----|
| NM_176833    | Ppm1f         | 72 |
| NM_177259    | Dab1          | 72 |
| NM_178666    | Themis        | 72 |
| NM_178750    | Ss1811        | 72 |
| NM_181682    | Dsg1b         | 72 |
| NM_197987    | Trim37        | 72 |
| NM_201531    | Kcnf1         | 72 |
| NR_028428    | 2610005L07Rik | 72 |
| NR_029460    | 6530402F18Rik | 72 |
| NR_030707    | Vmnlr-ps79    | 72 |
| NR_037920    | Zfa           | 72 |
| NM_001003909 | Ankib1        | 71 |
| NM_001005740 | Phactr1       | 71 |
| NM_001033351 | Grin3a        | 71 |
| NM_001033474 | Atxn713b      | 71 |
| NM_001034868 | Mrgprx2       | 71 |
| NM_001038609 | Mapt          | 71 |
| NM_001038696 | Rnpc3         | 71 |
| NM_001044308 | Cacn1i        | 71 |
| NM_001047433 | Dph3          | 71 |
| NM_001077403 | Nrp2          | 71 |
| NM_001081213 | Ermp1         | 71 |
| NM_001081394 | 0610007L01Rik | 71 |
| NM_001083114 | Pph1n1        | 71 |
| NM_001083316 | Pdgfra        | 71 |
| NM_001093754 | Dennd2d       | 71 |
| NM_001112697 | Chrm1         | 71 |
| NM_001146031 | Nrcam         | 71 |
| NM_001159551 | H13           | 71 |
| NM_001160404 | Galnt1        | 71 |
| NM_001163746 | Pgm3          | 71 |
| NM_001172136 | Exog          | 71 |
| NM_001195390 | Commd7        | 71 |
| NM_007758    | Cr2           | 71 |
| NM_007936    | Epha4         | 71 |
| NM_007967    | Evx2          | 71 |
| NM_008525    | Alad          | 71 |
| NM_008679    | Ncoa3         | 71 |
| NM_008961    | Pter          | 71 |
| NM_009157    | Map2k4        | 71 |
| NM_011385    | Ski           | 71 |
| NM_011401    | Slc2a3        | 71 |
| NM_011719    | Wnt9b         | 71 |
| NM_013763    | Tb12          | 71 |
| NM_017480    | Icos          | 71 |
| NM_019969    | Plag1         | 71 |
| NM_021524    | Nampt         | 71 |
| NM_026126    | Fundc2        | 71 |
| NM_026331    | Slc25a37      | 71 |
| NM_027472    | 5730455P16Rik | 71 |
| NM_027695    | Oxsm          | 71 |
| NM_028298    | Zfp655        | 71 |
| NM_029153    | Scamp1        | 71 |
| NM_030260    | Zxdc          | 71 |

|              |               |    |
|--------------|---------------|----|
| NM_031258    | Chrd11        | 71 |
| NM_133955    | Rhou          | 71 |
| NM_139146    | Satb2         | 71 |
| NM_144842    | Zmym5         | 71 |
| NM_145952    | Tbc1d12       | 71 |
| NM_146169    | Paip2b        | 71 |
| NM_153139    | Slc36a1       | 71 |
| NM_153501    | Pank2         | 71 |
| NM_153535    | Fam149a       | 71 |
| NM_153594    | Pcmt2         | 71 |
| NM_172134    | Pdxk          | 71 |
| NM_172391    | Ahsa2         | 71 |
| NM_172742    | Mtmr10        | 71 |
| NM_173748    | Nudcd3        | 71 |
| NM_175550    | Ap4e1         | 71 |
| NM_176850    | Bptf          | 71 |
| NM_177814    | Erc2          | 71 |
| NM_178065    | 1110018G07Rik | 71 |
| NM_178347    | Cdc23         | 71 |
| NM_199024    | Nol4          | 71 |
| NR_002688    | Gm13363       | 71 |
| NR_027976    | Wdr73         | 71 |
| NR_037982    | 9330159M07Rik | 71 |
| NM_001013367 | Prkaa1        | 70 |
| NM_001013390 | Scn4b         | 70 |
| NM_001024474 | Diras2        | 70 |
| NM_001033375 | A230046K03Rik | 70 |
| NM_001033600 | Acs14         | 70 |
| NM_001039939 | Asx11         | 70 |
| NM_001040400 | Tet2          | 70 |
| NM_001080969 | Thg11         | 70 |
| NM_001081255 | Lrch3         | 70 |
| NM_001098810 | Ptrh2         | 70 |
| NM_001111016 | Nav2          | 70 |
| NM_001112705 | Tlk2          | 70 |
| NM_001122896 | Hplbp3        | 70 |
| NM_001127260 | Trp63         | 70 |
| NM_001159662 | Ppp1r16b      | 70 |
| NM_001161767 | Galnt6        | 70 |
| NM_001164316 | Fam190a       | 70 |
| NM_001166648 | Zfp280c       | 70 |
| NM_001174086 | Shisa9        | 70 |
| NM_001204167 | Rapgef4       | 70 |
| NM_007501    | Neurod4       | 70 |
| NM_007880    | Arid3a        | 70 |
| NM_009285    | Stc1          | 70 |
| NM_009955    | Dpysl2        | 70 |
| NM_009994    | Cyp1b1        | 70 |
| NM_010028    | Ddx3x         | 70 |
| NM_010487    | Elavl3        | 70 |
| NM_010518    | Igfbp5        | 70 |
| NM_010918    | Nktr          | 70 |
| NM_011935    | Esrrg         | 70 |
| NM_013785    | Ip6k1         | 70 |

|              |               |    |
|--------------|---------------|----|
| NM_013803    | Casr          | 70 |
| NM_013881    | Ulk2          | 70 |
| NM_015828    | Gne           | 70 |
| NM_016963    | Tmod3         | 70 |
| NM_019496    | Ammecr1       | 70 |
| NM_020043    | Igdcc4        | 70 |
| NM_021477    | Rbfox1        | 70 |
| NM_024478    | Grpel1        | 70 |
| NM_025985    | Ube2g1        | 70 |
| NM_026184    | Ero11b        | 70 |
| NM_026719    | Lmbrd1        | 70 |
| NM_027166    | Ypel5         | 70 |
| NM_027922    | Ankle2        | 70 |
| NM_028017    | Napg          | 70 |
| NM_029416    | Klf17         | 70 |
| NM_029581    | Mtif3         | 70 |
| NM_029726    | Trdn          | 70 |
| NM_145548    | Cyp2j13       | 70 |
| NM_145959    | D15Ert621e    | 70 |
| NM_172734    | Stk38l        | 70 |
| NM_173181    | Fam164a       | 70 |
| NM_175155    | Sash1         | 70 |
| NM_175352    | Unc119b       | 70 |
| NM_175681    | Glp2r         | 70 |
| NM_177003    | 9630033F20Rik | 70 |
| NM_177155    | Klri2         | 70 |
| NM_177278    | L3mbt14       | 70 |
| NM_177327    | Wwp1          | 70 |
| NM_177354    | Vash1         | 70 |
| NM_177741    | Ppp1r3b       | 70 |
| NM_178214    | Hist2h2be     | 70 |
| NM_178367    | Dhx33         | 70 |
| NM_178886    | Ldlrad3       | 70 |
| NM_182927    | Spred3        | 70 |
| NM_199299    | Phf15         | 70 |
| NM_199317    | Phf16         | 70 |
| NM_207245    | Zfp870        | 70 |
| NR_030692    | A930011G23Rik | 70 |
| NM_001004143 | Usp22         | 69 |
| NM_001007465 | Rff1          | 69 |
| NM_001012273 | Birc5         | 69 |
| NM_001025102 | 2700007P21Rik | 69 |
| NM_001033239 | Csta          | 69 |
| NM_001038698 | Elavl4        | 69 |
| NM_001038703 | Gpr146        | 69 |
| NM_001039179 | Bicd2         | 69 |
| NM_001048208 | Med14         | 69 |
| NM_001080977 | Rsb1l1        | 69 |
| NM_001081205 | Nipal1        | 69 |
| NM_001081225 | Fam178a       | 69 |
| NM_001081279 | Mfhas1        | 69 |
| NM_001081401 | Adamts3       | 69 |
| NM_001111267 | Ncoa7         | 69 |
| NM_001113354 | Phf8          | 69 |

|              |               |    |
|--------------|---------------|----|
| NM_001159297 | Gcet2         | 69 |
| NM_001163154 | Etv1          | 69 |
| NM_001185153 | Zpbp          | 69 |
| NM_001193659 | Cldn12        | 69 |
| NM_001199177 | Opal          | 69 |
| NM_007466    | Api5          | 69 |
| NM_007788    | Csnk2a1       | 69 |
| NM_008194    | Gyk           | 69 |
| NM_008312    | Htr2c         | 69 |
| NM_008914    | Ppp3cb        | 69 |
| NM_009848    | Entpd1        | 69 |
| NM_011527    | Tal1          | 69 |
| NM_013860    | Limd1         | 69 |
| NM_019549    | Plek          | 69 |
| NM_019648    | Metap2        | 69 |
| NM_019724    | Mmp16         | 69 |
| NM_021605    | Nek7          | 69 |
| NM_021893    | Cd274         | 69 |
| NM_021899    | Foxj2         | 69 |
| NM_023348    | Snap29        | 69 |
| NM_023671    | Clns1a        | 69 |
| NM_024290    | Tnfrsf23      | 69 |
| NM_025747    | 4933411K20Rik | 69 |
| NM_026011    | Arl8b         | 69 |
| NM_026155    | Ssr3          | 69 |
| NM_027016    | Sec62         | 69 |
| NM_028059    | Zfp654        | 69 |
| NM_028990    | Tmem168       | 69 |
| NM_029425    | 4833424015Rik | 69 |
| NM_029658    | Fam101b       | 69 |
| NM_134099    | Fbxo4         | 69 |
| NM_172262    | Kdm1b         | 69 |
| NM_172403    | 2810021J22Rik | 69 |
| NM_172699    | Foxj3         | 69 |
| NM_172711    | Guf1          | 69 |
| NM_172736    | Leng8         | 69 |
| NM_172838    | Slc16a12      | 69 |
| NM_172938    | Scml4         | 69 |
| NM_175268    | Fam53b        | 69 |
| NM_176841    | Ccdc88a       | 69 |
| NM_177242    | Pptc7         | 69 |
| NM_177733    | E2f2          | 69 |
| NM_178357    | Klf11         | 69 |
| NM_178417    | Zfp867        | 69 |
| NM_178670    | 8030462N17Rik | 69 |
| NM_181315    | Car5b         | 69 |
| NM_181407    | Me3           | 69 |
| NM_198248    | Zbtb40        | 69 |
| NM_198620    | Rundc3b       | 69 |
| NM_199021    | Dpp10         | 69 |
| NM_201354    | Ctif          | 69 |
| NM_207205    | Igsf3         | 69 |
| NR_003248    | Foxl2os       | 69 |
| NR_024017    | 4930594C11Rik | 69 |

|              |               |    |
|--------------|---------------|----|
| NR_030675    | D730005E14Rik | 69 |
| NR_030719    | Gm8979        | 69 |
| NR_033462    | Gm10494       | 69 |
| NM_001001979 | Megf10        | 68 |
| NM_001004173 | Sgpp2         | 68 |
| NM_001004182 | Gm5567        | 68 |
| NM_001004190 | Zfp560        | 68 |
| NM_001013441 | Ric8b         | 68 |
| NM_001013813 | Maml2         | 68 |
| NM_001025163 | Zfp78         | 68 |
| NM_001025392 | Bclaf1        | 68 |
| NM_001025571 | Sh2d2a        | 68 |
| NM_001029890 | Mex3a         | 68 |
| NM_001034962 | Sorbs1        | 68 |
| NM_001037863 | Atp11c        | 68 |
| NM_001081160 | Mdgal         | 68 |
| NM_001081320 | Cyb561d1      | 68 |
| NM_001110208 | Akt2          | 68 |
| NM_001113355 | Vps26a        | 68 |
| NM_001135727 | Sh3kbp1       | 68 |
| NM_001144992 | 2810459M11Rik | 68 |
| NM_001146180 | Mtss1         | 68 |
| NM_001159729 | Rab23         | 68 |
| NM_001161456 | Cbfb          | 68 |
| NM_001162368 | Mgat4c        | 68 |
| NM_001163239 | Nqo2          | 68 |
| NM_001163332 | Cttnbp2n1     | 68 |
| NM_001170978 | Abat          | 68 |
| NM_001171147 | Yap1          | 68 |
| NM_001177705 | Homez         | 68 |
| NM_001198955 | Gm7694        | 68 |
| NM_007387    | Acp2          | 68 |
| NM_007499    | Atm           | 68 |
| NM_007537    | Bcl2l2        | 68 |
| NM_008216    | Has2          | 68 |
| NM_008397    | Itga6         | 68 |
| NM_008605    | Mmp12         | 68 |
| NM_009163    | Sgpl1         | 68 |
| NM_009367    | Tgfb2         | 68 |
| NM_009461    | Ubr1          | 68 |
| NM_009524    | Wnt5a         | 68 |
| NM_010026    | Asap1         | 68 |
| NM_010275    | Gdnf          | 68 |
| NM_011123    | Plp1          | 68 |
| NM_011299    | Rps6ka2       | 68 |
| NM_016674    | Cldn1         | 68 |
| NM_016862    | Vtila         | 68 |
| NM_018781    | Egr3          | 68 |
| NM_021308    | Piwil2        | 68 |
| NM_025419    | 1110059G10Rik | 68 |
| NM_025482    | Tpd52l2       | 68 |
| NM_026036    | Cmtm6         | 68 |
| NM_026302    | Dctn4         | 68 |
| NM_026993    | Ddah1         | 68 |

|              |               |    |
|--------------|---------------|----|
| NM_027188    | Smyd3         | 68 |
| NM_029998    | 6030458C11Rik | 68 |
| NM_030112    | Rtf1          | 68 |
| NM_080436    | Rdh1          | 68 |
| NM_145505    | Fam160b1      | 68 |
| NM_153138    | Wipfl         | 68 |
| NM_172399    | A930038C07Rik | 68 |
| NM_173752    | 1110067D22Rik | 68 |
| NM_177086    | Zmat4         | 68 |
| NM_177265    | 6330512M04Rik | 68 |
| NM_177366    | Gpr157        | 68 |
| NM_177784    | Klh123        | 68 |
| NM_177899    | Zfp866        | 68 |
| NM_177900    | Hapln4        | 68 |
| NM_178405    | Atp1a2        | 68 |
| NM_178681    | Dgkb          | 68 |
| NM_178730    | Tmprss11f     | 68 |
| NM_181073    | Plekhh1       | 68 |
| NM_183220    | Accs          | 68 |
| NM_207214    | Exoc5         | 68 |
| NR_015466    | 7530420F21Rik | 68 |
| NR_015542    | E430016F16Rik | 68 |
| NR_028262    | Rmst          | 68 |
| NR_033214    | B430212C06Rik | 68 |
| NR_033481    | Gm10474       | 68 |
| NR_033570    | Gm7104        | 68 |
| NM_001013784 | E130309D14Rik | 67 |
| NM_001025391 | Sufu          | 67 |
| NM_001029936 | Specc1        | 67 |
| NM_001033273 | 5031439G07Rik | 67 |
| NM_001033300 | Gmps          | 67 |
| NM_001033354 | Iqsec3        | 67 |
| NM_001042591 | Arrdc3        | 67 |
| NM_001048167 | Mtap6         | 67 |
| NM_001080549 | Hdx           | 67 |
| NM_001081149 | Myst3         | 67 |
| NM_001081388 | Rimbp2        | 67 |
| NM_001082476 | Ndor1         | 67 |
| NM_001099276 | Pik3c2b       | 67 |
| NM_001102458 | Azin1         | 67 |
| NM_001127382 | Rbm47         | 67 |
| NM_001164231 | Pwwp2a        | 67 |
| NM_001164472 | Nip7          | 67 |
| NM_001172205 | Arid5a        | 67 |
| NM_001177629 | Grb10         | 67 |
| NM_001185020 | Wnk1          | 67 |
| NM_001190733 | Dcun1d4       | 67 |
| NM_001205361 | Dcun1d1       | 67 |
| NM_007508    | Atp6v1a       | 67 |
| NM_007739    | Col8a1        | 67 |
| NM_008850    | Pitpna        | 67 |
| NM_009194    | Slc12a2       | 67 |
| NM_009847    | Cd2ap         | 67 |
| NM_010120    | Eif1a         | 67 |



|              |               |    |
|--------------|---------------|----|
| NM_010685    | Lamp2         | 67 |
| NM_010826    | Mrvil         | 67 |
| NM_011112    | Papola        | 67 |
| NM_011338    | Ccl9          | 67 |
| NM_011825    | Grem2         | 67 |
| NM_012024    | Ppp2r5e       | 67 |
| NM_013518    | Fgf9          | 67 |
| NM_016769    | Smad3         | 67 |
| NM_020606    | Parva         | 67 |
| NM_022305    | B4galt1       | 67 |
| NM_023409    | Npc2          | 67 |
| NM_026348    | Itgb3bp       | 67 |
| NM_027379    | Far1          | 67 |
| NM_028058    | Fundc1        | 67 |
| NM_028758    | Gga2          | 67 |
| NM_030131    | Cnih4         | 67 |
| NM_053171    | Csmd1         | 67 |
| NM_080795    | Lnx2          | 67 |
| NM_145076    | Trim24        | 67 |
| NM_146245    | Lrit1         | 67 |
| NM_153136    | Nudt18        | 67 |
| NM_153157    | Olfm3         | 67 |
| NM_153550    | Dirc2         | 67 |
| NM_170758    | Cd300a        | 67 |
| NM_172307    | Mbtps2        | 67 |
| NM_172599    | Atg14         | 67 |
| NM_172673    | Frmd5         | 67 |
| NM_172845    | Adamts4       | 67 |
| NM_175318    | Spty2d1       | 67 |
| NM_175414    | Tspan9        | 67 |
| NM_176832    | Spire1        | 67 |
| NM_177687    | Crebl2        | 67 |
| NM_177824    | 9830107B12Rik | 67 |
| NM_178672    | Scfd2         | 67 |
| NM_178675    | Slc35f1       | 67 |
| NM_183150    | BC003965      | 67 |
| NM_183201    | Slfn5         | 67 |
| NM_183225    | Usp24         | 67 |
| NR_015501    | 4833422C13Rik | 67 |
| NR_033532    | B230206H07Rik | 67 |
| NR_033620    | Olf947-ps1    | 67 |
| NM_001002268 | Gpr126        | 66 |
| NM_001035231 | Zfp748        | 66 |
| NM_001080818 | Cdc14a        | 66 |
| NM_001081376 | Chd5          | 66 |
| NM_001093759 | 2410002022Rik | 66 |
| NM_001102407 | Rbm8a         | 66 |
| NM_001110239 | Acpl          | 66 |
| NM_001136072 | Meis2         | 66 |
| NM_001136086 | Dpysl3        | 66 |
| NM_001159544 | Frk           | 66 |
| NM_001160251 | Zfp281        | 66 |
| NM_001160385 | Tmem196       | 66 |
| NM_001163793 | C530008M17Rik | 66 |

|              |               |    |
|--------------|---------------|----|
| NM_001164155 | Tnfrsf19      | 66 |
| NM_001164583 | Dnajc6        | 66 |
| NM_001168297 | Fbxo30        | 66 |
| NM_001177615 | Arpp21        | 66 |
| NM_001177713 | Cyp26b1       | 66 |
| NM_007688    | Cf12          | 66 |
| NM_007807    | Cybb          | 66 |
| NM_008549    | Man2a1        | 66 |
| NM_008779    | Cntn3         | 66 |
| NM_009371    | Tgfbr2        | 66 |
| NM_009640    | Angpt1        | 66 |
| NM_009797    | Capza1        | 66 |
| NM_010603    | Kcnj12        | 66 |
| NM_010832    | Msl3          | 66 |
| NM_011305    | Rxra          | 66 |
| NM_011372    | St6galnac3    | 66 |
| NM_011578    | Tgfbr3        | 66 |
| NM_011899    | Srp54a        | 66 |
| NM_011994    | Abcd2         | 66 |
| NM_013905    | Hey1          | 66 |
| NM_015733    | Casp9         | 66 |
| NM_019505    | Dgke          | 66 |
| NM_019667    | Stam2         | 66 |
| NM_019677    | Plcb1         | 66 |
| NM_019706    | Rnf138        | 66 |
| NM_021409    | Pard6b        | 66 |
| NM_023210    | Anp32e        | 66 |
| NM_025475    | Haus2         | 66 |
| NM_026735    | Mobkl1a       | 66 |
| NM_027314    |               | 66 |
|              | 5-Mar         |    |
| NM_027426    | 2610109H07Rik | 66 |
| NM_027664    | Rimklb        | 66 |
| NM_028013    | Endod1        | 66 |
| NM_031257    | Plekha2       | 66 |
| NM_032008    | Slmap         | 66 |
| NM_033320    | Glce          | 66 |
| NM_053271    | Rims2         | 66 |
| NM_054041    | Antxr1        | 66 |
| NM_080450    | Gjc3          | 66 |
| NM_133718    | Tmem30a       | 66 |
| NM_133769    | Cyfip2        | 66 |
| NM_145412    | Chtf8         | 66 |
| NM_145967    | Vstm2a        | 66 |
| NM_152809    | Csnk1g3       | 66 |
| NM_153399    | Syne1         | 66 |
| NM_153581    | Gpm6a         | 66 |
| NM_153592    | Erlin2        | 66 |
| NM_172409    | Fmn12         | 66 |
| NM_172589    | Lhfp12        | 66 |
| NM_172685    | Slc25a24      | 66 |
| NM_172716    | Pcgf3         | 66 |
| NM_172737    | Shisa7        | 66 |
| NM_173735    | 2310044G17Rik | 66 |
| NM_175204    | Psmbl1        | 66 |

|              |               |    |
|--------------|---------------|----|
| NM_175473    | Fras1         | 66 |
| NM_177224    | Chd9          | 66 |
| NM_177701    | Gm4894        | 66 |
| NM_178654    | Pkn2          | 66 |
| NM_183087    | Fam189a1      | 66 |
| NM_198599    | Map6d1        | 66 |
| NR_030715    | 3930402G23Rik | 66 |
| NR_033123    | 4933409K07Rik | 66 |
| NM_001001982 | A430105I19Rik | 65 |
| NM_001005506 | Txlna         | 65 |
| NM_001013411 | Nkain2        | 65 |
| NM_001025381 | Gpr17         | 65 |
| NM_001025567 | Dmbx1         | 65 |
| NM_001033145 | 1190002N15Rik | 65 |
| NM_001045540 | Gm12185       | 65 |
| NM_001081059 | Ccdc90a       | 65 |
| NM_001081061 | Bdp1          | 65 |
| NM_001081259 | Mfsd7b        | 65 |
| NM_001081310 | Fam23a        | 65 |
| NM_001081319 | C030046E11Rik | 65 |
| NM_001081956 | Akap17b       | 65 |
| NM_001097623 | Trerf1        | 65 |
| NM_001100451 | Msl2          | 65 |
| NM_001113325 | Grial         | 65 |
| NM_001113346 | Gatad2a       | 65 |
| NM_001113384 | Gnao1         | 65 |
| NM_001136240 | Chdh          | 65 |
| NM_001159500 | Esrrb         | 65 |
| NM_001160268 | Plekha6       | 65 |
| NM_001162917 | Dennd4a       | 65 |
| NM_001163356 | 6530418L21Rik | 65 |
| NM_001164497 | Papd5         | 65 |
| NM_001166625 | Ccr9          | 65 |
| NM_001205363 | Clec9a        | 65 |
| NM_008737    | Nrp1          | 65 |
| NM_009216    | Sstr1         | 65 |
| NM_009260    | Spnb2         | 65 |
| NM_010252    | Gabrg1        | 65 |
| NM_010716    | Lig3          | 65 |
| NM_011388    | Slc10a2       | 65 |
| NM_011485    | Star          | 65 |
| NM_013675    | Spnb1         | 65 |
| NM_016686    | Vezf1         | 65 |
| NM_017368    | Celf1         | 65 |
| NM_018744    | Sema6a        | 65 |
| NM_019586    | Ube2j1        | 65 |
| NM_020260    | Arhgap31      | 65 |
| NM_021340    | Rgr           | 65 |
| NM_022025    | Slc5a7        | 65 |
| NM_023134    | Sftpa1        | 65 |
| NM_024200    | Mfn1          | 65 |
| NM_025698    | Tmed7         | 65 |
| NM_025757    | 4933439F18Rik | 65 |
| NM_025901    | Polr3k        | 65 |

|              |               |          |
|--------------|---------------|----------|
| NM_025902    | Cisd2         | 65       |
| NM_026499    | Srsf6         | 65       |
| NM_027156    | Ddx51         | 65       |
| NM_027321    | Lrrc39        | 65       |
| NM_028032    | Ppp2r2a       | 65       |
| NM_028426    | 3110007F17Rik | 65       |
| NM_028730    | Pex26         | 65       |
| NM_029128    | Qtrtd1        | 65       |
| NM_029519    | Rap2a         | 65       |
| NM_029730    | Mospd2        | 65       |
| NM_029951    | C330007P06Rik | 65       |
| NM_033144    |               | 8-Sep 65 |
| NM_053158    | Mrpl1         | 65       |
| NM_053199    | Cadm3         | 65       |
| NM_133363    | Myoz3         | 65       |
| NM_133762    | Ncapg2        | 65       |
| NM_144549    | Trib1         | 65       |
| NM_144843    | Mtmr6         | 65       |
| NM_145152    | Lrrc3         | 65       |
| NM_145523    | Gca           | 65       |
| NM_145608    | BC021891      | 65       |
| NM_172442    | Dtx4          | 65       |
| NM_172882    | Wdfy3         | 65       |
| NM_172964    | Arhgap28      | 65       |
| NM_173414    | Lanc13        | 65       |
| NM_175009    | Eny2          | 65       |
| NM_175770    | Taf7          | 65       |
| NM_177077    | Exoc6b        | 65       |
| NM_177350    | Gldn          | 65       |
| NM_177763    | Lhfp14        | 65       |
| NM_178669    | Clrn3         | 65       |
| NM_178909    | Wdr92         | 65       |
| NM_181590    | Shq1          | 65       |
| NM_181754    | Gpr141        | 65       |
| NM_182807    | Fam19a2       | 65       |
| NM_183027    | Ap1s3         | 65       |
| NM_183195    | Marveld1      | 65       |
| NR_015606    | 9530009M10Rik | 65       |
| NR_027395    | Rnf44         | 65       |
| NR_029452    | 4932416H05Rik | 65       |
| NR_030781    | Ankrd10       | 65       |
| NM_001001980 | Limch1        | 64       |
| NM_001004025 | Ppp3r2        | 64       |
| NM_001013371 | Dtx31         | 64       |
| NM_001013381 | Rsad1         | 64       |
| NM_001013749 | Tmem151b      | 64       |
| NM_001025093 | Atf2          | 64       |
| NM_001033194 | Gtf3c3        | 64       |
| NM_001033299 | Zfp217        | 64       |
| NM_001033301 | Fhdc1         | 64       |
| NM_001033394 | Tmem88b       | 64       |
| NM_001033415 | Shisa3        | 64       |
| NM_001048054 | Dusp16        | 64       |
| NM_001081116 | Arhgef17      | 64       |

|              |               |    |
|--------------|---------------|----|
| NM_001081251 | Pbrml         | 64 |
| NM_001081371 | Dmxl1         | 64 |
| NM_001085495 | Arfgef2       | 64 |
| NM_001100452 | BC032203      | 64 |
| NM_001109753 | Sv2b          | 64 |
| NM_001110253 | Fyco1         | 64 |
| NM_001113423 | Slain2        | 64 |
| NM_001113573 | Brd3          | 64 |
| NM_001114399 | Zmym4         | 64 |
| NM_001128180 | Dlgap1        | 64 |
| NM_001146024 | Zfp444        | 64 |
| NM_001159519 | Pfas          | 64 |
| NM_001159582 | Pdel1a        | 64 |
| NM_001161798 | Mthfr         | 64 |
| NM_001164598 | Irf2bp2       | 64 |
| NM_001168277 | Jazf1         | 64 |
| NM_001168505 | Shoc2         | 64 |
| NM_001174053 | Camk2b        | 64 |
| NM_001204129 | Clqtnf1       | 64 |
| NM_001205341 | Ppfia2        | 64 |
| NM_007625    | Cbx4          | 64 |
| NM_007869    | Dnajc1        | 64 |
| NM_008031    | Fmr1          | 64 |
| NM_008156    | Gpld1         | 64 |
| NM_008881    | Plxna1        | 64 |
| NM_009229    | Sntb2         | 64 |
| NM_009625    | Adcyap1       | 64 |
| NM_009792    | Camk2a        | 64 |
| NM_009867    | Cdh4          | 64 |
| NM_010164    | Eya1          | 64 |
| NM_010202    | Fgf4          | 64 |
| NM_010279    | Gfra1         | 64 |
| NM_010306    | Gnai3         | 64 |
| NM_010800    | Bhlha15       | 64 |
| NM_011544    | Tcf12         | 64 |
| NM_015734    | Col5a1        | 64 |
| NM_016716    | Cul3          | 64 |
| NM_019550    | Ptbp2         | 64 |
| NM_020505    | Vav3          | 64 |
| NM_022995    | Pmepal        | 64 |
| NM_025408    | Acer3         | 64 |
| NM_026045    | Prpf18        | 64 |
| NM_026312    | 2610029G23Rik | 64 |
| NM_027432    | Wdr77         | 64 |
| NM_027823    | Arhgap42      | 64 |
| NM_028360    | Ttc19         | 64 |
| NM_028538    | 1700049G17Rik | 64 |
| NM_028839    | Tmem110       | 64 |
| NM_029432    | 4930402H24Rik | 64 |
| NM_030081    | Zfyve20       | 64 |
| NM_030143    | Ddit4l        | 64 |
| NM_030719    | Gatsl2        | 64 |
| NM_054046    | Def8          | 64 |
| NM_080451    | Synpo2        | 64 |

|              |               |    |
|--------------|---------------|----|
| NM_080855    | Zcchc14       | 64 |
| NM_133665    | Mef2d         | 64 |
| NM_134141    | Ciapin1       | 64 |
| NM_146002    | Rhbdd2        | 64 |
| NM_146243    | Actr2         | 64 |
| NM_146578    | Olfir1033     | 64 |
| NM_153105    | Cldn19        | 64 |
| NM_153393    | Col23a1       | 64 |
| NM_172049    | Tmem18        | 64 |
| NM_172476    | Tmc7          | 64 |
| NM_172592    | Srekl         | 64 |
| NM_172863    | Zfp697        | 64 |
| NM_172955    | Vcan          | 64 |
| NM_172979    | Muc15         | 64 |
| NM_175171    | Mast4         | 64 |
| NM_175431    | A830093I24Rik | 64 |
| NM_177305    | Arl4c         | 64 |
| NM_177595    | Mkx           | 64 |
| NM_178257    | I122ral       | 64 |
| NM_178396    | Car12         | 64 |
| NM_178794    | Zrsr2         | 64 |
| NM_181039    | Lphn1         | 64 |
| NM_183320    | Gm5128        | 64 |
| NM_194343    | Trim45        | 64 |
| NR_003568    | Gpr137b-ps    | 64 |
| NR_033446    | Slx1b         | 64 |
| NR_033621    | Olfir856-ps1  | 64 |
| NM_001004139 | Zfp619        | 63 |
| NM_001004364 | Asap2         | 63 |
| NM_001008702 | Dab2          | 63 |
| NM_001025309 | Pja2          | 63 |
| NM_001033360 | Gpr101        | 63 |
| NM_001033441 | Alg10b        | 63 |
| NM_001033481 | Gm98          | 63 |
| NM_001039515 | Arl4a         | 63 |
| NM_001042592 | Arrdc4        | 63 |
| NM_001044720 | Abcc9         | 63 |
| NM_001081154 | 4921513D23Rik | 63 |
| NM_001081176 | Polr3g        | 63 |
| NM_001081278 | Tbc1d4        | 63 |
| NM_001081391 | Csmd3         | 63 |
| NM_001085385 | 1600014C10Rik | 63 |
| NM_001085448 | Ctnnd1        | 63 |
| NM_001104616 | Rdx           | 63 |
| NM_001163013 | Ythdc2        | 63 |
| NM_001163516 | Pex5l         | 63 |
| NM_001164311 | Loxl4         | 63 |
| NM_001164572 | Snrk          | 63 |
| NM_001164604 | Nsmce2        | 63 |
| NM_001167885 | Suv420h1      | 63 |
| NM_001167981 | Galnt7        | 63 |
| NM_001173506 | Mtap1a        | 63 |
| NM_007389    | Chrna1        | 63 |
| NM_007481    | Arf6          | 63 |

|           |         |    |
|-----------|---------|----|
| NM_008105 | Gcnt2   | 63 |
| NM_008924 | Prkar2a | 63 |
| NM_009119 | Sap18   | 63 |
| NM_009383 | Tial1   | 63 |
| NM_009712 | Arsb    | 63 |
| NM_009987 | Cx3cr1  | 63 |
| NM_010242 | Fut4    | 63 |
| NM_010560 | I16st   | 63 |
| NM_011143 | Pou4f1  | 63 |
| NM_011198 | Ptgs2   | 63 |
| NM_011354 | Serf2   | 63 |
| NM_011484 | Stam    | 63 |
| NM_011629 | Nr2c1   | 63 |
| NM_011650 | Tsn     | 63 |
| NM_013464 | Ahr     | 63 |
| NM_013912 | Apln    | 63 |
| NM_015743 | Nr4a3   | 63 |
| NM_015767 | Ttpa    | 63 |
| NM_018733 | Scn1a   | 63 |
| NM_018768 | Stx8    | 63 |
| NM_018797 | Plxnc1  | 63 |
| NM_019400 | Rabep1  | 63 |
| NM_025481 | Smurf2  | 63 |
| NM_025590 | Acot11  | 63 |
| NM_025696 | Sorcs3  | 63 |
| NM_025884 | Zfp830  | 63 |
| NM_026642 | Trmt12  | 63 |
| NM_027192 | Tt1     | 63 |
| NM_028136 | Dhx36   | 63 |
| NM_028162 | Tbc1d5  | 63 |
| NM_028248 | Tmem87b | 63 |
| NM_028708 | Jakmip3 | 63 |
| NM_030727 | Slc26a5 | 63 |
| NM_031256 | Plekha3 | 63 |
| NM_054078 | Baz2a   | 63 |
| NM_134046 | Cenpo   | 63 |
| NM_139145 | Hlcs    | 63 |
| NM_145515 | Mark1   | 63 |
| NM_145611 | Kank2   | 63 |
| NM_146175 | Zfp282  | 63 |
| NM_153407 | Csrnp2  | 63 |
| NM_153552 | Thoc1   | 63 |
| NM_170593 | Disp2   | 63 |
| NM_172300 | Ube2z   | 63 |
| NM_172523 | Slc18a2 | 63 |
| NM_172550 | Ybey    | 63 |
| NM_172661 | Prrc2b  | 63 |
| NM_172920 | Dpy1911 | 63 |
| NM_172992 | Phtf2   | 63 |
| NM_173747 | Gpkow   | 63 |
| NM_175145 | Tmem127 | 63 |
| NM_175271 | Lpar4   | 63 |
| NM_175494 | Zfp367  | 63 |
| NM_177387 | Ust     | 63 |

|              |               |    |
|--------------|---------------|----|
| NM_177475    | Zfp280b       | 63 |
| NM_178626    | Cdc42se2      | 63 |
| NM_182808    | Fam19a1       | 63 |
| NR_003623    | Gm5069        | 63 |
| NR_003967    | Gm4759        | 63 |
| NR_004843    | BC090627      | 63 |
| NR_015494    | 4930511M06Rik | 63 |
| NR_015498    | 1500004A13Rik | 63 |
| NR_027858    | Nlrplc-ps     | 63 |
| NR_028445    | F930015N05Rik | 63 |
| NR_030731    | Phf21b        | 63 |
| NR_033491    | Gm10466       | 63 |
| NR_036615    | Srsf7         | 63 |
| NM_001001186 | Zfp456        | 62 |
| NM_001001447 | Zscan22       | 62 |
| NM_001004062 | Crtc1         | 62 |
| NM_001025261 | Tpd52         | 62 |
| NM_001033285 | Cdc42bpa      | 62 |
| NM_001033978 | H2-Eb2        | 62 |
| NM_001039092 | Tom112        | 62 |
| NM_001040026 | Scol          | 62 |
| NM_001048139 | Bdnf          | 62 |
| NM_001048143 | Mon1b         | 62 |
| NM_001048227 | Dbnidd2       | 62 |
| NM_001077359 | Git2          | 62 |
| NM_001081144 | Zfp518b       | 62 |
| NM_001081196 | Hnrnpu12      | 62 |
| NM_001083917 | Scn3b         | 62 |
| NM_001093775 | Myt11         | 62 |
| NM_001102436 | Acbd5         | 62 |
| NM_001113388 | BC021785      | 62 |
| NM_001113517 | Arhgef7       | 62 |
| NM_001136061 | Ednrb         | 62 |
| NM_001141927 | Pln           | 62 |
| NM_001145947 | Bacel         | 62 |
| NM_001146005 | Gpr77         | 62 |
| NM_001159407 | B3gnt5        | 62 |
| NM_001163579 | Lrrcc1        | 62 |
| NM_001164745 | Ptp4a2        | 62 |
| NM_001164797 | Heph11        | 62 |
| NM_001166372 |               | 62 |
| NM_001166506 | Sec1411       | 62 |
| NM_001168600 | Gn131         | 62 |
| NM_001195662 | Rp1           | 62 |
| NM_001205369 | Casc4         | 62 |
| NM_007789    | Ncan          | 62 |
| NM_008047    | Fstl1         | 62 |
| NM_008379    | Kpnb1         | 62 |
| NM_008509    | Lpl           | 62 |
| NM_009906    | Tpp1          | 62 |
| NM_010021    | Dazl          | 62 |
| NM_010578    | Itgb1         | 62 |
| NM_010831    | Sik1          | 62 |
| NM_011197    | Ptgfrn        | 62 |

1-Mar



|              |               |    |
|--------------|---------------|----|
| NM_011249    | Rb11          | 62 |
| NM_011580    | Thbs1         | 62 |
| NM_016721    | Iqgap1        | 62 |
| NM_016746    | Ccnc          | 62 |
| NM_018804    | Syt11         | 62 |
| NM_019739    | Foxo1         | 62 |
| NM_022317    | Slc28a3       | 62 |
| NM_023503    | Ing2          | 62 |
| NM_023908    | Slco3a1       | 62 |
| NM_024291    | Ky            | 62 |
| NM_025356    | Ube2d3        | 62 |
| NM_025904    | 1600012F09Rik | 62 |
| NM_026198    | Tmem167b      | 62 |
| NM_026276    | Aasdhppt      | 62 |
| NM_026792    | Agpat5        | 62 |
| NM_027468    | Cpm           | 62 |
| NM_027860    | 0610010F05Rik | 62 |
| NM_028722    | Msl1          | 62 |
| NM_029793    | Golgal        | 62 |
| NM_030685    | Serp1         | 62 |
| NM_030728    | 9930013L23Rik | 62 |
| NM_033325    | Lox12         | 62 |
| NM_134015    | Fbxw11        | 62 |
| NM_144789    | Prdm15        | 62 |
| NM_146520    | Olfr536       | 62 |
| NM_148929    | Slc9a8        | 62 |
| NM_153103    | Kif1c         | 62 |
| NM_172288    | Nup133        | 62 |
| NM_172712    | Uba6          | 62 |
| NM_172762    | Rbm34         | 62 |
| NM_172869    | Frmd3         | 62 |
| NM_173363    | Eif5          | 62 |
| NM_175095    | Commd2        | 62 |
| NM_175344    | Ano6          | 62 |
| NM_175562    | Rab39         | 62 |
| NM_177267    | Dcaf5         | 62 |
| NR_029450    | C530005A16Rik | 62 |
| NR_037990    | BC055402      | 62 |
| NM_001008231 | Daam2         | 61 |
| NM_001013577 | 1110054005Rik | 61 |
| NM_001033276 | M112          | 61 |
| NM_001033783 | Gm5615        | 61 |
| NM_001040187 | Ddx17         | 61 |
| NM_001081068 | Ltn1          | 61 |
| NM_001111279 | Wdfy1         | 61 |
| NM_001134399 | Megf11        | 61 |
| NM_001136084 | Tph1          | 61 |
| NM_001142918 | Tcf712        | 61 |
| NM_001164237 | Rnf41         | 61 |
| NM_001164636 | A730011L01Rik | 61 |
| NM_001166138 | Armc8         | 61 |
| NM_001166218 | Zfp712        | 61 |
| NM_001171004 | Prkd3         | 61 |
| NM_001190703 | Dlk1          | 61 |

|              |               |    |
|--------------|---------------|----|
| NM_001190718 | Dcaf12l1      | 61 |
| NM_001195023 | Nploc4        | 61 |
| NM_007405    | Adcy6         | 61 |
| NM_007429    | Agtr2         | 61 |
| NM_007548    | Prdm1         | 61 |
| NM_007552    | Bmi1          | 61 |
| NM_007798    | Ctsb          | 61 |
| NM_007824    | Cyp7a1        | 61 |
| NM_007832    | Dck           | 61 |
| NM_007868    | Dmd           | 61 |
| NM_008378    | Impact        | 61 |
| NM_008426    | Kcnj3         | 61 |
| NM_008552    | Mas1          | 61 |
| NM_008562    | Mcl1          | 61 |
| NM_008708    | Nmt2          | 61 |
| NM_008867    | Pla2r1        | 61 |
| NM_008913    | Ppp3ca        | 61 |
| NM_009008    | Rac2          | 61 |
| NM_009011    | Rad23b        | 61 |
| NM_009313    | Tacr1         | 61 |
| NM_010093    | E2f3          | 61 |
| NM_010342    | Npbwr1        | 61 |
| NM_010593    | Jup           | 61 |
| NM_010897    | Nf1           | 61 |
| NM_011041    | Pax9          | 61 |
| NM_011740    | Ywhaz         | 61 |
| NM_013736    | Tceb3         | 61 |
| NM_013834    | Sfrp1         | 61 |
| NM_015822    | Fbxl3         | 61 |
| NM_016912    | Cdk12         | 61 |
| NM_019914    | Mllt11        | 61 |
| NM_021396    | Pdcd1lg2      | 61 |
| NM_024124    | Hdac9         | 61 |
| NM_025918    | Ccdc43        | 61 |
| NM_026079    | Ikkap         | 61 |
| NM_026102    | Daam1         | 61 |
| NM_026666    | Ubn1          | 61 |
| NM_026904    | Anapc10       | 61 |
| NM_027081    | Fam116b       | 61 |
| NM_027558    | Pgrmc2        | 61 |
| NM_028873    | Dnajc14       | 61 |
| NM_029929    | Vps33a        | 61 |
| NM_030234    | Wdr76         | 61 |
| NM_033564    | Mpv17l        | 61 |
| NM_133815    | Lbr           | 61 |
| NM_133825    | D1Erttd622e   | 61 |
| NM_145516    | Plekhb2       | 61 |
| NM_172601    | Rab2b         | 61 |
| NM_172674    | Phf20         | 61 |
| NM_172739    | Gr1f1         | 61 |
| NM_173386    | E330016A19Rik | 61 |
| NM_175193    | Golim4        | 61 |
| NM_175245    | Mzt1          | 61 |
| NM_176836    | Fam76b        | 61 |

|              |               |    |
|--------------|---------------|----|
| NM_177033    | Vwc2          | 61 |
| NM_177333    | Exoc3         | 61 |
| NM_178411    | Zfp334        | 61 |
| NM_183185    | Zfp300        | 61 |
| NM_198029    | Fermt1        | 61 |
| NM_199062    | Zfp781        | 61 |
| NM_212445    | Kdelc2        | 61 |
| NR_015517    | 5930412G12Rik | 61 |
| NR_015523    | A730017L22Rik | 61 |
| NR_027630    | Kctd18        | 61 |
| NR_028590    | Gm14005       | 61 |
| NR_030712    | 3110099E03Rik | 61 |
| NR_033241    | Bmp1          | 61 |
| NR_033588    | AY512931      | 61 |
| NM_001004761 | Gpr158        | 60 |
| NM_001007154 | Phactr3       | 60 |
| NM_001013360 | Npcd          | 60 |
| NM_001025426 | Depdc5        | 60 |
| NM_001029912 | Zswim5        | 60 |
| NM_001033960 | Rabgap1       | 60 |
| NM_001034030 | Limk2         | 60 |
| NM_001037955 | Dusp22        | 60 |
| NM_001044718 | Zfp41         | 60 |
| NM_001080706 | Btaf1         | 60 |
| NM_001081147 | Oxtr          | 60 |
| NM_001081211 | Ptafr         | 60 |
| NM_001081232 | D5Erttd579e   | 60 |
| NM_001081315 | Brpf3         | 60 |
| NM_001083880 | 1600012H06Rik | 60 |
| NM_001113563 | Stat5b        | 60 |
| NM_001142937 | Moap1         | 60 |
| NM_001159964 | Eps15         | 60 |
| NM_001161797 | Phactr4       | 60 |
| NM_001164597 | Znf512b       | 60 |
| NM_001164620 | Ccdc157       | 60 |
| NM_001164785 | Adamts20      | 60 |
| NM_001166497 | 3110052M02Rik | 60 |
| NM_001170847 | Rbm20         | 60 |
| NM_001177349 | Pydc4         | 60 |
| NM_001177653 | Hist1h2be     | 60 |
| NM_001177732 | Plch1         | 60 |
| NM_001195816 | Pld5          | 60 |
| NM_001200038 | 1700021K19Rik | 60 |
| NM_007570    | Btg2          | 60 |
| NM_007690    | Chd1          | 60 |
| NM_007883    | Dsg2          | 60 |
| NM_008013    | Fg12          | 60 |
| NM_008744    | Ntn1          | 60 |
| NM_008796    | Pctp          | 60 |
| NM_008966    | Ptgfr         | 60 |
| NM_009099    | Trim30a       | 60 |
| NM_009179    | St3gal2       | 60 |
| NM_009642    | Agtrap        | 60 |
| NM_009697    | Nr2f2         | 60 |

|           |               |    |
|-----------|---------------|----|
| NM_010317 | Gng4          | 60 |
| NM_010901 | Nfatc3        | 60 |
| NM_011317 | Khdrbs1       | 60 |
| NM_011507 | Suc1g2        | 60 |
| NM_011929 | Clcn6         | 60 |
| NM_013657 | Sema3c        | 60 |
| NM_013889 | Zfp292        | 60 |
| NM_016886 | Gria3         | 60 |
| NM_016898 | Cd164         | 60 |
| NM_017395 | Rfx5          | 60 |
| NM_018878 | Paxip1        | 60 |
| NM_019423 | Elov12        | 60 |
| NM_019455 | Hpgds         | 60 |
| NM_020570 | Xrcc2         | 60 |
| NM_021896 | Gucyl1a3      | 60 |
| NM_025451 | Camk2n1       | 60 |
| NM_025745 | Erlec1        | 60 |
| NM_026106 | Dr1           | 60 |
| NM_027543 | Gpr173        | 60 |
| NM_027722 | Nudt4         | 60 |
| NM_028756 | Slc35a5       | 60 |
| NM_028836 | Ctbs          | 60 |
| NM_029850 | Bcl7a         | 60 |
| NM_030689 | Nptxr         | 60 |
| NM_031186 | Ndst3         | 60 |
| NM_033552 | Slc4a10       | 60 |
| NM_053198 | Sfxn4         | 60 |
| NM_133648 | Slc12a6       | 60 |
| NM_133990 | I113ra1       | 60 |
| NM_145400 | Ube4a         | 60 |
| NM_145820 | Veph1         | 60 |
| NM_145833 | Lin28a        | 60 |
| NM_153415 | Pomt2         | 60 |
| NM_153512 | Kcng3         | 60 |
| NM_172146 | Ppat          | 60 |
| NM_172420 | Ppp1r1c       | 60 |
| NM_172595 | Arl15         | 60 |
| NM_172862 | Frem2         | 60 |
| NM_173731 | Hmgcl11       | 60 |
| NM_173863 | Crtc3         | 60 |
| NM_175104 | Fam53c        | 60 |
| NM_175532 | Nlrp10        | 60 |
| NM_175647 | Dmrt1         | 60 |
| NM_175678 | Npsr1         | 60 |
| NM_176928 | Brwd1         | 60 |
| NM_177260 | Tmem154       | 60 |
| NM_177628 | Fam167a       | 60 |
| NM_177662 | Ctso          | 60 |
| NM_177681 | Zfp12         | 60 |
| NM_177709 | Tusc5         | 60 |
| NM_177857 | Dennd2c       | 60 |
| NM_178646 | Tigd5         | 60 |
| NM_198421 | Usp49         | 60 |
| NM_207281 | 4832428D23Rik | 60 |

|              |               |    |
|--------------|---------------|----|
| NR_003513    | Neat1         | 60 |
| NR_028421    | D430020J02Rik | 60 |
| NR_029447    | E130317F20Rik | 60 |
| NR_030670    | Gm15760       | 60 |
| NR_033525    | Wiz           | 60 |
| NR_033542    | Gm10636       | 60 |
| NR_033543    | Gm16287       | 60 |
| NM_001001488 | Atp8b1        | 59 |
| NM_001004436 | Wapal         | 59 |
| NM_001014981 | Wdr7          | 59 |
| NM_001018042 | Sp3           | 59 |
| NM_001025572 | Ankrd12       | 59 |
| NM_001033279 | D17Wsu92e     | 59 |
| NM_001033759 | Tmem2         | 59 |
| NM_001034863 | Tmem136       | 59 |
| NM_001035239 | Trpm3         | 59 |
| NM_001038610 | Dach1         | 59 |
| NM_001039537 | Lif           | 59 |
| NM_001081103 | Stim2         | 59 |
| NM_001081252 | Uggt2         | 59 |
| NM_001081345 | Chd2          | 59 |
| NM_001081445 | Ncam1         | 59 |
| NM_001112731 | C030039L03Rik | 59 |
| NM_001113362 | Tbc1d14       | 59 |
| NM_001145821 | Ggtal         | 59 |
| NM_001160150 | Amy2a4        | 59 |
| NM_001160151 | Amy2a3        | 59 |
| NM_001160152 | Amy2a2        | 59 |
| NM_001163018 | Suz12         | 59 |
| NM_001164286 | Gm5415        | 59 |
| NM_001170855 | Trim36        | 59 |
| NM_001177794 | Sertad4       | 59 |
| NM_001191001 | Lins          | 59 |
| NM_001198977 | Sykb          | 59 |
| NM_001204875 | Set           | 59 |
| NM_007983    | Faf1          | 59 |
| NM_008171    | Grin2b        | 59 |
| NM_008273    | Hoxd11        | 59 |
| NM_008624    | Mras          | 59 |
| NM_009068    | Ripk1         | 59 |
| NM_009186    | Tra2b         | 59 |
| NM_009250    | Serpini1      | 59 |
| NM_009308    | Syt4          | 59 |
| NM_009634    | Adsl          | 59 |
| NM_009817    | Cast          | 59 |
| NM_010072    | Dpml          | 59 |
| NM_010921    | Nkx3-1        | 59 |
| NM_011030    | P4hal         | 59 |
| NM_011066    | Per2          | 59 |
| NM_011277    | Rnf2          | 59 |
| NM_011520    | Sdc3          | 59 |
| NM_011669    | Usp12         | 59 |
| NM_011803    | Klf6          | 59 |
| NM_011924    | Avpr1b        | 59 |

|              |               |    |
|--------------|---------------|----|
| NM_013845    | Ror1          | 59 |
| NM_018788    | Extl3         | 59 |
| NM_021296    | Grpel2        | 59 |
| NM_022427    | Gpr88         | 59 |
| NM_025691    | Srp72         | 59 |
| NM_025817    | Tril          | 59 |
| NM_026487    | Atad1         | 59 |
| NM_027871    | Arhgef3       | 59 |
| NM_028902    | Hsf2bp        | 59 |
| NM_028935    | Zfp558        | 59 |
| NM_029979    | Trim35        | 59 |
| NM_030725    | Syt13         | 59 |
| NM_030750    | Sgpp1         | 59 |
| NM_031402    | Crispld1      | 59 |
| NM_033322    | Lztf11        | 59 |
| NM_052977    | Adarb2        | 59 |
| NM_130796    | Snx18         | 59 |
| NM_133774    | Stard4        | 59 |
| NM_133808    | Hdlbp         | 59 |
| NM_133853    | Magi3         | 59 |
| NM_139269    | Pla2g16       | 59 |
| NM_146223    | Cplx3         | 59 |
| NM_146339    | Olfir77       | 59 |
| NM_170588    | Cpnel         | 59 |
| NM_170599    | Igsf11        | 59 |
| NM_170756    | Spata2        | 59 |
| NM_172282    | Tmco3         | 59 |
| NM_172698    | 4732418C07Rik | 59 |
| NM_173784    | Ubtd2         | 59 |
| NM_175347    | Srl           | 59 |
| NM_177572    | Rimkla        | 59 |
| NM_178258    | I122ra2       | 59 |
| NM_178632    | Ints7         | 59 |
| NM_178870    | Hs3st3a1      | 59 |
| NM_182939    | Ppp4r2        | 59 |
| NM_183281    | 2310005G13Rik | 59 |
| NM_198294    | Tanc1         | 59 |
| NM_198860    | AI646023      | 59 |
| NM_207657    | 5031410I06Rik | 59 |
| NR_002854    | Dlx1as        | 59 |
| NR_003960    | Gm5478        | 59 |
| NR_015549    | Trmt61b       | 59 |
| NR_024093    | U05342        | 59 |
| NR_027854    | Clk1          | 59 |
| NR_033503    | E530011L22Rik | 59 |
| NM_001029843 | Vrk1          | 58 |
| NM_001034851 | Fam134b       | 58 |
| NM_001039364 | Mobp          | 58 |
| NM_001042528 | Cacnalb       | 58 |
| NM_001080557 | Vamp1         | 58 |
| NM_001081020 | Adamts6       | 58 |
| NM_001081499 | Tbc1d8b       | 58 |
| NM_001083587 | Tns3          | 58 |
| NM_001083810 | Prr51         | 58 |

|              |               |    |
|--------------|---------------|----|
| NM_001099298 | Scn2a1        | 58 |
| NM_001109684 | 9030409G11Rik | 58 |
| NM_001110100 | Banp          | 58 |
| NM_001122685 | Rhbdd1        | 58 |
| NM_001146007 | Trim12c       | 58 |
| NM_001159564 | Itgb6         | 58 |
| NM_001160208 | Blzfl         | 58 |
| NM_001163734 | Rrp1b         | 58 |
| NM_001167828 | Trim30d       | 58 |
| NM_001168358 | Tyw3          | 58 |
| NM_001170745 | Magi2         | 58 |
| NM_001177543 | 0610010B08Rik | 58 |
| NM_001177579 | Gm10471       | 58 |
| NM_001177778 | Dlg3          | 58 |
| NM_001190179 | Nup35         | 58 |
| NM_001190400 | Bend7         | 58 |
| NM_001195579 | Gm15070       | 58 |
| NM_001199349 | Cd9912        | 58 |
| NM_008102    | Gch1          | 58 |
| NM_008812    | Padi2         | 58 |
| NM_008861    | Pkd2          | 58 |
| NM_008964    | Ptger2        | 58 |
| NM_009259    | Spn           | 58 |
| NM_009359    | Tex9          | 58 |
| NM_009557    | Zfp46         | 58 |
| NM_009576    | Zic4          | 58 |
| NM_009831    | Ccng1         | 58 |
| NM_010007    | Cyp2j5        | 58 |
| NM_010079    | Dsg1a         | 58 |
| NM_010251    | Gabra4        | 58 |
| NM_010833    | Msn           | 58 |
| NM_010871    | Naip6         | 58 |
| NM_011081    | Piga          | 58 |
| NM_011815    | Fyb           | 58 |
| NM_011884    | Rngtt         | 58 |
| NM_013751    | Hrasls        | 58 |
| NM_015771    | Lats2         | 58 |
| NM_019818    | Timm22        | 58 |
| NM_020025    | B3galt2       | 58 |
| NM_021382    | Tacr3         | 58 |
| NM_021383    | Rqcd1         | 58 |
| NM_023423    | Akirin1       | 58 |
| NM_024450    | Scd3          | 58 |
| NM_024459    | Ppp3r1        | 58 |
| NM_025553    | Mrpl11        | 58 |
| NM_025828    | Lman2         | 58 |
| NM_025949    | Rps6ka6       | 58 |
| NM_026168    | Ergic2        | 58 |
| NM_026367    | Gpatch2       | 58 |
| NM_026689    | Mull          | 58 |
| NM_026891    | Cdan1         | 58 |
| NM_027879    | Cdc40         | 58 |
| NM_027885    | Smug1         | 58 |
| NM_029679    | Fam65b        | 58 |

|              |               |    |
|--------------|---------------|----|
| NM_029920    | Mtus2         | 58 |
| NM_030132    | Utp23         | 58 |
| NM_030257    | Lysmd3        | 58 |
| NM_030688    | Illrap12      | 58 |
| NM_054068    | Vsx1          | 58 |
| NM_133196    | Cstf2         | 58 |
| NM_133215    | Mtmr4         | 58 |
| NM_139144    | Ogt           | 58 |
| NM_144524    | Angell        | 58 |
| NM_144550    | Spicel        | 58 |
| NM_145138    | Nek9          | 58 |
| NM_145943    | BC031781      | 58 |
| NM_153808    | Smc5          | 58 |
| NM_172396    | 9130011J15Rik | 58 |
| NM_172728    | Creb5         | 58 |
| NM_172790    | Ankrd52       | 58 |
| NM_175088    | Mdfic         | 58 |
| NM_175122    | Rab39b        | 58 |
| NM_175136    | Rnf122        | 58 |
| NM_177208    | Dopey1        | 58 |
| NM_177215    | Ocr1          | 58 |
| NM_177388    | Slc41a2       | 58 |
| NM_177578    | Skint3        | 58 |
| NM_177838    | Fam163a       | 58 |
| NM_177918    | AV320801      | 58 |
| NM_178397    | Faf2          | 58 |
| NM_178421    | Nanos1        | 58 |
| NM_178609    | E2f7          | 58 |
| NM_178749    | Stk32a        | 58 |
| NM_178786    | Skint4        | 58 |
| NM_183024    | Raver2        | 58 |
| NM_184088    | Dennd4c       | 58 |
| NM_198169    | Gmeb2         | 58 |
| NM_198631    | Zc3h4         | 58 |
| NM_198937    | Hn11          | 58 |
| NR_003962    | Vmn2r-ps11    | 58 |
| NR_015586    | A330035P11Rik | 58 |
| NR_015599    | A330076H08Rik | 58 |
| NR_030694    | 1110002L01Rik | 58 |
| NR_036469    | LOC100499420  | 58 |
| NM_001001806 | Zfp3612       | 57 |
| NM_001004066 | Zfp386        | 57 |
| NM_001013580 | Pard3         | 57 |
| NM_001025312 | Dclrelb       | 57 |
| NM_001025590 | Kcnj6         | 57 |
| NM_001029937 | Sec1413       | 57 |
| NM_001033221 | AU023871      | 57 |
| NM_001045527 | Hsf5          | 57 |
| NM_001080974 | Sri           | 57 |
| NM_001081113 | Ipo8          | 57 |
| NM_001081125 | Gli2          | 57 |
| NM_001098227 | Sdcbp         | 57 |
| NM_001099349 | Gm14308       | 57 |
| NM_001100415 | Gm14430       | 57 |



|              |               |    |
|--------------|---------------|----|
| NM_001101804 | Gm14434       | 57 |
| NM_001110791 | Sf1           | 57 |
| NM_001122733 | Kit           | 57 |
| NM_001134902 | AU019823      | 57 |
| NM_001146010 | Fchsd2        | 57 |
| NM_001159657 | 5430407P10Rik | 57 |
| NM_001163728 | 4930563E22Rik | 57 |
| NM_001166493 | Rasgrp3       | 57 |
| NM_001170960 | Dtwd2         | 57 |
| NM_001199676 | Camkk2        | 57 |
| NM_007594    | Calu          | 57 |
| NM_007610    | Casp2         | 57 |
| NM_007631    | Ccnd1         | 57 |
| NM_007874    | Reep5         | 57 |
| NM_007930    | Enc1          | 57 |
| NM_008792    | Pcsk2         | 57 |
| NM_008926    | Prkg2         | 57 |
| NM_008996    | Rab1          | 57 |
| NM_009040    | Rdh16         | 57 |
| NM_009061    | Rgs2          | 57 |
| NM_009212    | Ighmbp2       | 57 |
| NM_009504    | Vdr           | 57 |
| NM_009915    | Ccr2          | 57 |
| NM_010389    | H2-Ob         | 57 |
| NM_010696    | Lcp2          | 57 |
| NM_010881    | Ncoal         | 57 |
| NM_010890    | Nedd4         | 57 |
| NM_011561    | Tdg           | 57 |
| NM_011581    | Thbs2         | 57 |
| NM_011682    | Utrn          | 57 |
| NM_011720    | Wnt8b         | 57 |
| NM_012012    | Exo1          | 57 |
| NM_019785    | Actr10        | 57 |
| NM_019948    | Clec4e        | 57 |
| NM_023311    | Yipf5         | 57 |
| NM_023434    | Tox4          | 57 |
| NM_025681    | Lix1          | 57 |
| NM_026697    | Rab14         | 57 |
| NM_027400    | Lman1         | 57 |
| NM_027494    | Zcchc8        | 57 |
| NM_028123    | Slc37a3       | 57 |
| NM_028953    | Tmc1          | 57 |
| NM_028959    | Cep72         | 57 |
| NM_029779    | Ccdc116       | 57 |
| NM_030614    | Fgf16         | 57 |
| NM_031390    | Prame13       | 57 |
| NM_031874    | Rab3d         | 57 |
| NM_133225    | Acbd3         | 57 |
| NM_133685    | Rab31         | 57 |
| NM_133739    | Tmem123       | 57 |
| NM_133847    | Tm9sf4        | 57 |
| NM_134042    | Aldh6a1       | 57 |
| NM_144530    | Zc3h11a       | 57 |
| NM_146105    | Cnst          | 57 |

|              |               |    |
|--------------|---------------|----|
| NM_172414    | Fam164c       | 57 |
| NM_172469    | Clic6         | 57 |
| NM_172514    | Tmem71        | 57 |
| NM_172668    | Lrp4          | 57 |
| NM_173022    | BC048403      | 57 |
| NM_173427    | Klhdc7a       | 57 |
| NM_173764    | Tapt1         | 57 |
| NM_175184    | Fam125b       | 57 |
| NM_177732    | Slc35d1       | 57 |
| NM_177783    | Ubr3          | 57 |
| NM_181395    | Pxdn          | 57 |
| NM_181579    | Pof1b         | 57 |
| NM_183179    | Kcnc2         | 57 |
| NM_197996    | Tspan15       | 57 |
| NM_198024    | Ranbp31       | 57 |
| NM_198302    | Rbm11         | 57 |
| NR_033568    | 9430041J12Rik | 57 |
| NR_038034    | 4930444F02Rik | 57 |
| NM_001005863 | Mtus1         | 56 |
| NM_001007570 | Slc25a42      | 56 |
| NM_001025779 | Cdc6          | 56 |
| NM_001025947 | Dnm11         | 56 |
| NM_001033877 | Adamts17      | 56 |
| NM_001040692 | Slc6a18       | 56 |
| NM_001081457 | Ppp2r5c       | 56 |
| NM_001085508 | Tmem8b        | 56 |
| NM_001110214 | Dclre1c       | 56 |
| NM_001110832 | Nfya          | 56 |
| NM_001122843 | Tnpo2         | 56 |
| NM_001126330 | Trp73         | 56 |
| NM_001127348 | Snx10         | 56 |
| NM_001134299 | Gm10220       | 56 |
| NM_001145826 | Specc11       | 56 |
| NM_001146161 | Slc11a2       | 56 |
| NM_001159492 | Gpatch8       | 56 |
| NM_001159647 | Cntnl         | 56 |
| NM_001161800 | Klhl7         | 56 |
| NM_001161817 | Myo1b         | 56 |
| NM_001163354 | Rhot1         | 56 |
| NM_001163493 | Stard13       | 56 |
| NM_001164159 | Ppp6r3        | 56 |
| NM_001167750 | Ccdc132       | 56 |
| NM_001169131 | Papd7         | 56 |
| NM_001177843 | Frmd4a        | 56 |
| NM_007568    | Btc           | 56 |
| NM_007616    | Cav1          | 56 |
| NM_007857    | Dhh           | 56 |
| NM_008081    | B4galnt2      | 56 |
| NM_008308    | Htr1a         | 56 |
| NM_008506    | Myc11         | 56 |
| NM_008596    | Syp12         | 56 |
| NM_008710    | Nnt           | 56 |
| NM_008832    | Phka1         | 56 |
| NM_008884    | Pml           | 56 |

|           |          |    |
|-----------|----------|----|
| NM_008937 | Prox1    | 56 |
| NM_009120 | Sarla    | 56 |
| NM_009135 | Scn7a    | 56 |
| NM_009197 | Slc16a2  | 56 |
| NM_009502 | Vcl      | 56 |
| NM_009575 | Zic3     | 56 |
| NM_009917 | Ccr5     | 56 |
| NM_010074 | Dpp4     | 56 |
| NM_010111 | Efnb2    | 56 |
| NM_010166 | Eya3     | 56 |
| NM_010250 | Gabra1   | 56 |
| NM_010818 | Cd200    | 56 |
| NM_011278 | Rnf4     | 56 |
| NM_011402 | Slc34a2  | 56 |
| NM_011448 | Sox9     | 56 |
| NM_011892 | Sgcg     | 56 |
| NM_012008 | Ddx3y    | 56 |
| NM_012017 | Zfp346   | 56 |
| NM_012032 | Serinc3  | 56 |
| NM_013727 | Azi2     | 56 |
| NM_013729 | Mixl1    | 56 |
| NM_013771 | Yme1l1   | 56 |
| NM_013861 | Tpk1     | 56 |
| NM_013927 | Cngb3    | 56 |
| NM_016796 | Vamp4    | 56 |
| NM_020584 | Terf2ip  | 56 |
| NM_020604 | Jph1     | 56 |
| NM_021491 | Smpd3    | 56 |
| NM_021880 | Prkar1a  | 56 |
| NM_024182 | Riok3    | 56 |
| NM_026164 | Pnpla8   | 56 |
| NM_026743 | Tspan11  | 56 |
| NM_027498 | Sik3     | 56 |
| NM_027698 | Eri2     | 56 |
| NM_028053 | Tmem38b  | 56 |
| NM_028291 | Pan3     | 56 |
| NM_028451 | Larp1    | 56 |
| NM_028748 | Paqr5    | 56 |
| NM_029022 | Scrn3    | 56 |
| NM_029736 | Slc10a7  | 56 |
| NM_133208 | Zfp287   | 56 |
| NM_133983 | Cd276    | 56 |
| NM_138756 | Slc25a36 | 56 |
| NM_144551 | Trib2    | 56 |
| NM_144811 | Cbx7     | 56 |
| NM_144814 | Rcor3    | 56 |
| NM_144925 | Tnrc6a   | 56 |
| NM_145443 | L2hgdh   | 56 |
| NM_145452 | Rasa1    | 56 |
| NM_146194 | Picalm   | 56 |
| NM_148938 | Slc1a3   | 56 |
| NM_148941 | Elovl4   | 56 |
| NM_153573 | Fkbp14   | 56 |
| NM_172564 | Tns4     | 56 |

|              |               |    |
|--------------|---------------|----|
| NM_172591    | Fcho2         | 56 |
| NM_172687    | Coq3          | 56 |
| NM_172705    | Phf13         | 56 |
| NM_172785    | Zc3h12d       | 56 |
| NM_172833    | Malt1         | 56 |
| NM_172903    | Man2a2        | 56 |
| NM_172930    | Fam70a        | 56 |
| NM_173760    | Ppip5k2       | 56 |
| NM_175163    | Zfp689        | 56 |
| NM_177368    | Tmtc2         | 56 |
| NM_177758    | Zscan20       | 56 |
| NM_177775    | Esyt3         | 56 |
| NM_177854    | 6030405A18Rik | 56 |
| NM_178639    | Sfxn5         | 56 |
| NM_178656    | Pirt          | 56 |
| NM_181402    | Parp11        | 56 |
| NM_194336    | Gbp6          | 56 |
| NM_197985    | Adipor2       | 56 |
| NM_198301    | Fam105a       | 56 |
| NR_015463    | 9430008C03Rik | 56 |
| NR_015544    | 9630028H03Rik | 56 |
| NR_034155    | 0lfr1372-ps1  | 56 |
| NR_036456    | A730020M07Rik | 56 |
| NR_037964    | 2610507I01Rik | 56 |
| NM_001001184 | Ccdc111       | 55 |
| NM_001004762 | Pla2g4c       | 55 |
| NM_001007223 | Clec3a        | 55 |
| NM_001008533 | Adora1        | 55 |
| NM_001013024 | Usp13         | 55 |
| NM_001024135 | Kbtbd7        | 55 |
| NM_001024849 | Gm14325       | 55 |
| NM_001033258 | D10Bwgl379e   | 55 |
| NM_001038230 | Anapc11       | 55 |
| NM_001038700 | Fnbp1         | 55 |
| NM_001039586 | Glyctk        | 55 |
| NM_001081426 | Dip2c         | 55 |
| NM_001081982 | Nfix          | 55 |
| NM_001098528 | Kcnb2         | 55 |
| NM_001099785 | D3Erttd751e   | 55 |
| NM_001111017 | Sera1         | 55 |
| NM_001114662 | Mfsd4         | 55 |
| NM_001139520 | Samhd1        | 55 |
| NM_001159525 | Pex19         | 55 |
| NM_001159717 |               | 55 |
| NM_001160018 | Tor1aip1      | 55 |
| NM_001163513 | Dlg5          | 55 |
| NM_001163792 | Fam76a        | 55 |
| NM_001164885 | Lpin2         | 55 |
| NM_001174155 | Rasgrp4       | 55 |
| NM_001177900 | Rd3           | 55 |
| NM_001194940 | Dlc1          | 55 |
| NM_001197046 | Fgfr1op       | 55 |
| NM_001199988 | BC019943      | 55 |
| NM_001205313 | Stat1         | 55 |

2-Sep

|           |               |    |
|-----------|---------------|----|
| NM_007399 | Adam10        | 55 |
| NM_007737 | Col5a2        | 55 |
| NM_007873 | Doc2b         | 55 |
| NM_007958 | Smarcad1      | 55 |
| NM_008017 | Smc2          | 55 |
| NM_008620 | Gbp4          | 55 |
| NM_008752 | Nxph2         | 55 |
| NM_009054 | Trim27        | 55 |
| NM_009147 | Sec23a        | 55 |
| NM_009275 | Srprb         | 55 |
| NM_009521 | Wnt3          | 55 |
| NM_009633 | Adra2b        | 55 |
| NM_009871 | Cdk5r1        | 55 |
| NM_010127 | Pou6f1        | 55 |
| NM_010148 | Epn2          | 55 |
| NM_010604 | Kcnj16        | 55 |
| NM_010605 | Kcnj5         | 55 |
| NM_010914 | Nfyb          | 55 |
| NM_011158 | Prkar2b       | 55 |
| NM_011521 | Sdc4          | 55 |
| NM_011673 | Ugcg          | 55 |
| NM_011790 | Arih2         | 55 |
| NM_011838 | Lynx1         | 55 |
| NM_013681 | Syn2          | 55 |
| NM_013743 | Pdk4          | 55 |
| NM_013797 | Slco1a1       | 55 |
| NM_016670 | Pknox1        | 55 |
| NM_016858 | Rab33b        | 55 |
| NM_016979 | Prkx          | 55 |
| NM_016985 | Mtmr1         | 55 |
| NM_018830 | Asah2         | 55 |
| NM_019396 | Cyhr1         | 55 |
| NM_019412 | Prx           | 55 |
| NM_019425 | Gnpnat1       | 55 |
| NM_019643 | Fam60a        | 55 |
| NM_019651 | Ptpn9         | 55 |
| NM_019794 | Dnaja2        | 55 |
| NM_021406 | Trem1         | 55 |
| NM_021424 | Pvrl1         | 55 |
| NM_022415 | Ptges         | 55 |
| NM_023047 | Dpysl5        | 55 |
| NM_023314 | Eif4e2        | 55 |
| NM_023689 | Spock3        | 55 |
| NM_025638 | Gdpd1         | 55 |
| NM_025673 | Golph3        | 55 |
| NM_025706 | Tbc1d15       | 55 |
| NM_025812 | Hmg20a        | 55 |
| NM_025821 | Carhsp1       | 55 |
| NM_026390 | Ubxn4         | 55 |
| NM_026515 | 2810417H13Rik | 55 |
| NM_026535 | Serpina12     | 55 |
| NM_026599 | Cgnl1         | 55 |
| NM_027093 | 2310003L22Rik | 55 |
| NM_027335 | 2210016F16Rik | 55 |

|              |               |    |
|--------------|---------------|----|
| NM_027407    | Ic11          | 55 |
| NM_027530    | Rufy3         | 55 |
| NM_028232    | Sgol1         | 55 |
| NM_028343    | Tmem135       | 55 |
| NM_028874    | Snx19         | 55 |
| NM_028914    | 4933406J08Rik | 55 |
| NM_029770    | Unc5b         | 55 |
| NM_029952    | Zfp955a       | 55 |
| NM_030184    | Armc9         | 55 |
| NM_031249    | Cstf2t        | 55 |
| NM_053144    | Pcdhb19       | 55 |
| NM_080445    | B3galt6       | 55 |
| NM_080853    | Slc17a6       | 55 |
| NM_133222    | Eld1          | 55 |
| NM_133781    | Cab39         | 55 |
| NM_133797    | 4833439L19Rik | 55 |
| NM_133940    | Fbxl14        | 55 |
| NM_133942    | Plekha1       | 55 |
| NM_138587    | Fam3c         | 55 |
| NM_138628    | Txlnb         | 55 |
| NM_139272    | Galnt2        | 55 |
| NM_144905    | 6330416G13Rik | 55 |
| NM_145144    | Aif11         | 55 |
| NM_148926    | Zfand3        | 55 |
| NM_153117    | 9530068E07Rik | 55 |
| NM_172610    | Mpped1        | 55 |
| NM_172700    | Zmpste24      | 55 |
| NM_175025    | Atp2c1        | 55 |
| NM_175091    | Tnks          | 55 |
| NM_175175    | Plekhf2       | 55 |
| NM_175381    | 2700081015Rik | 55 |
| NM_176999    | Atp10b        | 55 |
| NM_177162    | 9930032022Rik | 55 |
| NM_177338    | Hmbox1        | 55 |
| NM_178079    | Pm20d1        | 55 |
| NM_178080    | Pde4dip       | 55 |
| NM_178398    | Wipi2         | 55 |
| NM_178751    | Orai2         | 55 |
| NM_180600    | Ube2q2        | 55 |
| NM_198033    | Setx          | 55 |
| NM_198619    | Zfp933        | 55 |
| NM_199007    | Sgol2         | 55 |
| NM_207708    | Syng1         | 55 |
| NM_212446    | Psmf1         | 55 |
| NR_015539    | 9630013A20Rik | 55 |
| NR_015567    | A930007I19Rik | 55 |
| NR_024619    | 2610001J05Rik | 55 |
| NR_027886    | A930013F10Rik | 55 |
| NR_027981    | 1810064F22Rik | 55 |
| NM_001004363 | Nuak1         | 54 |
| NM_001007577 | Tceanc        | 54 |
| NM_001024622 | Pcnp          | 54 |
| NM_001039530 | Parp14        | 54 |
| NM_001042438 | Zhx1          | 54 |

|              |          |    |
|--------------|----------|----|
| NM_001081021 | Zfp780b  | 54 |
| NM_001081170 | Pacs2    | 54 |
| NM_001081256 | Kdm3b    | 54 |
| NM_001083901 | Hiat11   | 54 |
| NM_001104529 | Gpr35    | 54 |
| NM_001109914 | Apold1   | 54 |
| NM_001110017 | Dzip3    | 54 |
| NM_001110315 | Kif1a    | 54 |
| NM_001110850 | Crem     | 54 |
| NM_001113327 | Fam131b  | 54 |
| NM_001113331 | Shc1     | 54 |
| NM_001122899 | Lepr     | 54 |
| NM_001127191 | Snx16    | 54 |
| NM_001127576 | Gm1564   | 54 |
| NM_001145960 | Slc37a2  | 54 |
| NM_001159392 | Tnfaip1  | 54 |
| NM_001159904 | Klrb1c   | 54 |
| NM_001161355 | Timd2    | 54 |
| NM_001163311 | Srr      | 54 |
| NM_001163348 | Ntn1     | 54 |
| NM_001164099 | Add3     | 54 |
| NM_001164201 | Lass3    | 54 |
| NM_001166644 | Zfp651   | 54 |
| NM_001167983 | Sipa11   | 54 |
| NM_001168521 | Sarm1    | 54 |
| NM_001168578 | Tceal8   | 54 |
| NM_001171187 | Mal      | 54 |
| NM_001177669 | Golph31  | 54 |
| NM_001191051 | Lysmd4   | 54 |
| NM_007444    | Amd2     | 54 |
| NM_007623    | Cbx2     | 54 |
| NM_007870    | Dnase113 | 54 |
| NM_007920    | Elf1     | 54 |
| NM_008057    | Fzd7     | 54 |
| NM_008073    | Gabrg2   | 54 |
| NM_008304    | Sdc2     | 54 |
| NM_008493    | Lep      | 54 |
| NM_008507    | Sh2b3    | 54 |
| NM_009062    | Rgs4     | 54 |
| NM_009507    | Vhl      | 54 |
| NM_009665    | Amd1     | 54 |
| NM_009667    | Ampd3    | 54 |
| NM_009974    | Csnk2a2  | 54 |
| NM_010220    | Fkbp5    | 54 |
| NM_010431    | Hif1a    | 54 |
| NM_010546    | Ikbkb    | 54 |
| NM_010553    | I118rap  | 54 |
| NM_010586    | Itpr2    | 54 |
| NM_010683    | Lamc1    | 54 |
| NM_011594    | Timp2    | 54 |
| NM_011674    | Ugt8a    | 54 |
| NM_013514    | Epb4.9   | 54 |
| NM_013516    | Ms4a2    | 54 |
| NM_016785    | Tpmt     | 54 |

|           |               |    |
|-----------|---------------|----|
| NM_016882 | Sart1         | 54 |
| NM_018765 | Wbp4          | 54 |
| NM_019588 | Plce1         | 54 |
| NM_019933 | Ptpn4         | 54 |
| NM_020010 | Cyp51         | 54 |
| NM_021506 | Sh3rf1        | 54 |
| NM_023794 | Etv5          | 54 |
| NM_025662 | Pigk          | 54 |
| NM_026178 | Mmd           | 54 |
| NM_026179 | Abhd5         | 54 |
| NM_026272 | Narf          | 54 |
| NM_026609 | Leprot11      | 54 |
| NM_026908 | Cab391        | 54 |
| NM_027052 | Slc38a4       | 54 |
| NM_027878 | Dram1         | 54 |
| NM_028087 | Gcnt3         | 54 |
| NM_028097 | Tmem68        | 54 |
| NM_028757 | Neb1          | 54 |
| NM_028850 | Chic2         | 54 |
| NM_029809 | 2310014L17Rik | 54 |
| NM_029999 | Lbh           | 54 |
| NM_030014 | Hook1         | 54 |
| NM_030209 | Crispld2      | 54 |
| NM_030598 | Rcan2         | 54 |
| NM_030705 | Mesdc1        | 54 |
| NM_030708 | Zfhx4         | 54 |
| NM_031195 | Msr1          | 54 |
| NM_133201 | Mfn2          | 54 |
| NM_134033 | Ccdc117       | 54 |
| NM_138301 | Trpm2         | 54 |
| NM_138604 | Otud5         | 54 |
| NM_138956 | Rassf3        | 54 |
| NM_145541 | Rap1a         | 54 |
| NM_145951 | Enox2         | 54 |
| NM_146168 | Voppl         | 54 |
| NM_153412 | Phldb2        | 54 |
| NM_153574 | Fam13a        | 54 |
| NM_153591 | Nars2         | 54 |
| NM_172450 | 4930539E08Rik | 54 |
| NM_172537 | Sema6d        | 54 |
| NM_172871 | Klh19         | 54 |
| NM_172880 | Tmprss11e     | 54 |
| NM_172918 | Zfp317        | 54 |
| NM_173033 | Tstd2         | 54 |
| NM_175149 | 2310022B05Rik | 54 |
| NM_175380 | Gpd11         | 54 |
| NM_175507 | Tmem20        | 54 |
| NM_177190 | Tcp1111       | 54 |
| NM_177310 | Xpnpep3       | 54 |
| NM_177411 | Rab5b         | 54 |
| NM_178711 | Plscr4        | 54 |
| NM_178777 | Nhlh2         | 54 |
| NM_178801 | 6030446N20Rik | 54 |
| NM_178887 | Fibcd1        | 54 |



|              |               |    |
|--------------|---------------|----|
| NM_178891    | Prmt6         | 54 |
| NM_178920    | Mal2          | 54 |
| NM_198625    | Mtss11        | 54 |
| NR_003619    | 6330549D23Rik | 54 |
| NR_024078    | Btbd19        | 54 |
| NR_028115    | Lilra6        | 54 |
| NR_028143    | Lrrc28        | 54 |
| NR_037970    | Brd2          | 54 |
| NR_038018    | LOC100417125  | 54 |
| NM_001003671 | Pcdhac1       | 53 |
| NM_001003672 | Pcdhac2       | 53 |
| NM_001009930 | Brsk2         | 53 |
| NM_001013025 | Tgfbrap1      | 53 |
| NM_001013766 | Samd3         | 53 |
| NM_001025577 | Maf           | 53 |
| NM_001029982 | Sec23ip       | 53 |
| NM_001033795 | Zcchc16       | 53 |
| NM_001033879 | Tuba13        | 53 |
| NM_001037713 | Xaf1          | 53 |
| NM_001039071 | Ldb3          | 53 |
| NM_001040395 | 1110020G09Rik | 53 |
| NM_001042649 | Dcun1d2       | 53 |
| NM_001077496 | Evi2b         | 53 |
| NM_001080129 | Tmpo          | 53 |
| NM_001081110 | Cd8a          | 53 |
| NM_001081186 | D630042F21Rik | 53 |
| NM_001081231 | Lhfp13        | 53 |
| NM_001081363 | Cenpf         | 53 |
| NM_001085416 | Zfp467        | 53 |
| NM_001110142 | Cul4b         | 53 |
| NM_001110310 | Snx12         | 53 |
| NM_001122736 | Igf2          | 53 |
| NM_001122822 | Wrn           | 53 |
| NM_001130163 | Oxr1          | 53 |
| NM_001130529 | Zkscan17      | 53 |
| NM_001145880 | Zfp790        | 53 |
| NM_001145886 | Tiam1         | 53 |
| NM_001163471 | Hectd2        | 53 |
| NM_001163566 | Crb2          | 53 |
| NM_001164772 | Fbxw2         | 53 |
| NM_001167996 | 1110032F04Rik | 53 |
| NM_001170433 | Ppfibpl       | 53 |
| NM_001170742 | Wdr59         | 53 |
| NM_001172107 | Gramd1c       | 53 |
| NM_001198811 | Frem1         | 53 |
| NM_001204916 | H60c          | 53 |
| NM_001205099 | Npy2r         | 53 |
| NM_001205219 | Sorbs2        | 53 |
| NM_007619    | Cbl           | 53 |
| NM_007735    | Col4a4        | 53 |
| NM_007766    | Pcdha4        | 53 |
| NM_007767    | Pcdha6        | 53 |
| NM_008067    | Gabra3        | 53 |
| NM_009006    | Map4k2        | 53 |

|           |               |    |
|-----------|---------------|----|
| NM_009191 | Clpb          | 53 |
| NM_009199 | Slc1a1        | 53 |
| NM_009211 | Smarcc1       | 53 |
| NM_009302 | Swap70        | 53 |
| NM_009527 | Wnt7a         | 53 |
| NM_009644 | Ahrr          | 53 |
| NM_009957 | Pcdha7        | 53 |
| NM_009959 | Pcdha5        | 53 |
| NM_009960 | Pcdha11       | 53 |
| NM_009961 | Pcdha10       | 53 |
| NM_009963 | Cry2          | 53 |
| NM_010017 | Dag1          | 53 |
| NM_010134 | En2           | 53 |
| NM_010284 | Ghr           | 53 |
| NM_010287 | Gpr83         | 53 |
| NM_010900 | Nfatc2ip      | 53 |
| NM_011067 | Per3          | 53 |
| NM_011200 | Ptp4a1        | 53 |
| NM_011603 | Tbpl1         | 53 |
| NM_011734 | Siae          | 53 |
| NM_013504 | Dsc1          | 53 |
| NM_013663 | Srsf3         | 53 |
| NM_013692 | Klf10         | 53 |
| NM_013770 | Slc25a10      | 53 |
| NM_013820 | Hk2           | 53 |
| NM_013823 | Kl            | 53 |
| NM_019654 | Socs5         | 53 |
| NM_020497 | Zfp276        | 53 |
| NM_022420 | Gprc5b        | 53 |
| NM_023249 | Ypel1         | 53 |
| NM_023266 | Zfp120        | 53 |
| NM_023626 | Ing3          | 53 |
| NM_024226 | Rtn4          | 53 |
| NM_024254 | 2410042D21Rik | 53 |
| NM_025862 | Acad8         | 53 |
| NM_025951 | Pi4k2b        | 53 |
| NM_027519 | 6330406I15Rik | 53 |
| NM_027926 | Cpa4          | 53 |
| NM_028140 | Mfsd8         | 53 |
| NM_028459 | Was1          | 53 |
| NM_028696 | Obfc2a        | 53 |
| NM_028840 | Armc1         | 53 |
| NM_028876 | Tmed5         | 53 |
| NM_029107 | 4930417G10Rik | 53 |
| NM_030139 | Zfp449        | 53 |
| NM_053106 | Lmod1         | 53 |
| NM_053117 | Pard6g        | 53 |
| NM_054057 | Prosc         | 53 |
| NM_054072 | Pcdha1        | 53 |
| NM_054087 | Slc19a2       | 53 |
| NM_133227 | Nup155        | 53 |
| NM_133683 | Tmem19        | 53 |
| NM_138661 | Pcdha9        | 53 |
| NM_138662 | Pcdha3        | 53 |

|              |               |    |
|--------------|---------------|----|
| NM_138663    | Pcdha12       | 53 |
| NM_138675    | Med9          | 53 |
| NM_139228    | Rhbd13        | 53 |
| NM_144866    | Etf1          | 53 |
| NM_144906    | Sgip1         | 53 |
| NM_144933    | Med17         | 53 |
| NM_145393    | Ythdf2        | 53 |
| NM_145575    | Caldl         | 53 |
| NM_153459    | Dusp7         | 53 |
| NM_153506    | Clec2e        | 53 |
| NM_153802    | Zfp128        | 53 |
| NM_172124    | B3gat2        | 53 |
| NM_172678    | Acad9         | 53 |
| NM_172689    | Ddx58         | 53 |
| NM_172867    | Zfp462        | 53 |
| NM_175466    | Zfp770        | 53 |
| NM_177226    | Zfp629        | 53 |
| NM_177646    | Dgkd          | 53 |
| NM_178613    | 4933433P14Rik | 53 |
| NM_178685    | Pcdh20        | 53 |
| NM_198117    | Pcdha2        | 53 |
| NM_198617    | Tspyl3        | 53 |
| NM_201243    | Pcdha8        | 53 |
| NM_201367    | Gpr176        | 53 |
| NM_201368    | Xkr8          | 53 |
| NM_207232    | Ptpdc1        | 53 |
| NR_024328    | 9230116N13Rik | 53 |
| NR_027515    | Rbm18         | 53 |
| NR_028066    | Gm4926        | 53 |
| NR_028267    | Fchol         | 53 |
| NR_033548    | D030047H15Rik | 53 |
| NR_038004    | 4931429P17Rik | 53 |
| NR_038055    | 2310065F04Rik | 53 |
| NM_001005507 | Smg7          | 52 |
| NM_001033443 | Cdk14         | 52 |
| NM_001033528 | Usp36         | 52 |
| NM_001037740 | Fam40b        | 52 |
| NM_001038627 | Smurf1        | 52 |
| NM_001039039 | Kctd21        | 52 |
| NM_001039167 | Rbfox3        | 52 |
| NM_001039219 | Gm6086        | 52 |
| NM_001039677 | Slc30a2       | 52 |
| NM_001047159 | Net1          | 52 |
| NM_001081180 | Spink5        | 52 |
| NM_001081193 | Lemd3         | 52 |
| NM_001081236 | 2410131K14Rik | 52 |
| NM_001081684 | Zfp295        | 52 |
| NM_001081750 | Zfp664        | 52 |
| NM_001083894 | Liph          | 52 |
| NM_001083919 | Xirp2         | 52 |
| NM_001093764 | Myadm         | 52 |
| NM_001103165 | Pcbp2         | 52 |
| NM_001110337 | Gprc5c        | 52 |
| NM_001111316 | Ptprc         | 52 |

|              |               |    |
|--------------|---------------|----|
| NM_001145877 | Slc25a44      | 52 |
| NM_001161362 | Ppp2r3a       | 52 |
| NM_001163548 | Cyth3         | 52 |
| NM_001163643 | Map3k12       | 52 |
| NM_001164804 | Coro2a        | 52 |
| NM_001170981 | Hhrnpc        | 52 |
| NM_001177792 | Snap23        | 52 |
| NM_001177812 | D19Wsu162e    | 52 |
| NM_001190297 | Gpr155        | 52 |
| NM_001197024 | Unk1          | 52 |
| NM_001198933 | Me1           | 52 |
| NM_007603    | Capn6         | 52 |
| NM_009322    | Tbr1          | 52 |
| NM_009329    | Zfp354a       | 52 |
| NM_009390    | Tl11          | 52 |
| NM_010137    | Epas1         | 52 |
| NM_011084    | Pik3c2g       | 52 |
| NM_011373    | St6galnac4    | 52 |
| NM_011381    | Six3          | 52 |
| NM_011512    | Surf4         | 52 |
| NM_011546    | Zeb1          | 52 |
| NM_011758    | Zfp39         | 52 |
| NM_011820    | Ggt5          | 52 |
| NM_012048    | Polk          | 52 |
| NM_015751    | Abce1         | 52 |
| NM_016900    | Cav2          | 52 |
| NM_018747    | Akap7         | 52 |
| NM_018761    | Ctnnal1       | 52 |
| NM_018873    | Srcin1        | 52 |
| NM_019440    | Irgm2         | 52 |
| NM_019645    | Pkp1          | 52 |
| NM_019835    | B4galt5       | 52 |
| NM_020278    | Lgil          | 52 |
| NM_020493    | Srf           | 52 |
| NM_022989    | Arl6ip6       | 52 |
| NM_023764    | Tollip        | 52 |
| NM_023831    | Ift46         | 52 |
| NM_025283    | Mobk13        | 52 |
| NM_025695    | Smc6          | 52 |
| NM_026172    | Decr1         | 52 |
| NM_026220    | Mfap1a        | 52 |
| NM_026893    | Dcaf12        | 52 |
| NM_027421    | Ints2         | 52 |
| NM_028349    | Sass6         | 52 |
| NM_028385    | Setd5         | 52 |
| NM_028940    | Clvs1         | 52 |
| NM_029007    | Fam84a        | 52 |
| NM_029077    | Trim14        | 52 |
| NM_029166    | Uhrf1bp11     | 52 |
| NM_029967    | Adamts11      | 52 |
| NM_030692    | Sacm11        | 52 |
| NM_053169    | Trim16        | 52 |
| NM_133697    | 1110003E01Rik | 52 |
| NM_133887    | Stx12         | 52 |

|              |               |    |
|--------------|---------------|----|
| NM_134189    | Galnt10       | 52 |
| NM_145136    | Myocd         | 52 |
| NM_145564    | Fbxo21        | 52 |
| NM_145923    | Rel11         | 52 |
| NM_146239    | Cdk17         | 52 |
| NM_172652    | 4632411B12Rik | 52 |
| NM_172851    | Cntnap5b      | 52 |
| NM_173016    | Vat11         | 52 |
| NM_173756    | Lin52         | 52 |
| NM_175283    | Srd5a1        | 52 |
| NM_175480    | Zfp612        | 52 |
| NM_176940    | Nwd1          | 52 |
| NM_177236    | Atp2b3        | 52 |
| NM_177256    | Prdx6-ps1     | 52 |
| NM_177271    | Samd5         | 52 |
| NM_177397    | Atp6v1g3      | 52 |
| NM_177545    | Vangl1        | 52 |
| NM_177700    | Atmin         | 52 |
| NM_177751    | Cnksr2        | 52 |
| NM_177771    | Klh118        | 52 |
| NM_178017    | Hmgxb4        | 52 |
| NM_178774    | Prr18         | 52 |
| NM_178912    | Fancm         | 52 |
| NM_183187    | Fam107a       | 52 |
| NM_197945    | Prosapip1     | 52 |
| NM_199015    | D14Ert668e    | 52 |
| NM_199221    | Cd3001b       | 52 |
| NR_003188    | Kis2          | 52 |
| NR_003520    | Mx1           | 52 |
| NR_029463    | 9430083A17Rik | 52 |
| NR_033627    | AA619741      | 52 |
| NR_037589    | Rbm7          | 52 |
| NM_001001160 | Fbxo41        | 51 |
| NM_001003918 | Usp7          | 51 |
| NM_001005868 | Erbb2ip       | 51 |
| NM_001010834 | Slc10a5       | 51 |
| NM_001013778 | Fam18a        | 51 |
| NM_001025589 | Rfxank        | 51 |
| NM_001033210 | Pls1          | 51 |
| NM_001033405 | Trem12        | 51 |
| NM_001033453 | Pdp1          | 51 |
| NM_001034858 | Armc2         | 51 |
| NM_001034885 | Pnpla1        | 51 |
| NM_001039153 | Tctn1         | 51 |
| NM_001042485 | Tmem183a      | 51 |
| NM_001045520 | Clint1        | 51 |
| NM_001081342 | Gpr133        | 51 |
| NM_001081403 | Klh114        | 51 |
| NM_001109905 | Stau1         | 51 |
| NM_001112703 | Ab11          | 51 |
| NM_001115010 | Lin54         | 51 |
| NM_001122820 | Ap3m2         | 51 |
| NM_001144987 | Spg20         | 51 |
| NM_001146059 | Als2c1        | 51 |

|              |         |    |
|--------------|---------|----|
| NM_001159589 | Sirt1   | 51 |
| NM_001163283 | Zbtb5   | 51 |
| NM_001163619 | Tars2   | 51 |
| NM_001164056 | Pld1    | 51 |
| NM_001164109 | Nfatc1  | 51 |
| NM_001164359 | Erlin1  | 51 |
| NM_001168508 | Mapk14  | 51 |
| NM_001168615 | Tifab   | 51 |
| NM_001177759 | Tnfaip8 | 51 |
| NM_001199301 | Cacng5  | 51 |
| NM_001205068 | Jmjd4   | 51 |
| NM_007862    | Dlg1    | 51 |
| NM_007911    | Efnb3   | 51 |
| NM_007962    | Mpz12   | 51 |
| NM_008211    | H3f3b   | 51 |
| NM_008365    | I118r1  | 51 |
| NM_008766    | Slc22a6 | 51 |
| NM_009218    | Sstr3   | 51 |
| NM_009288    | Stk10   | 51 |
| NM_009939    | Cops2   | 51 |
| NM_009984    | Ctsl    | 51 |
| NM_010169    | F2r     | 51 |
| NM_010340    | Gpr50   | 51 |
| NM_010515    | Igf2r   | 51 |
| NM_010583    | Itk     | 51 |
| NM_010757    | Mafk    | 51 |
| NM_010821    | Mpeg1   | 51 |
| NM_010893    | Neu1    | 51 |
| NM_011136    | Pou2af1 | 51 |
| NM_011513    | Med22   | 51 |
| NM_011514    | Suv39h1 | 51 |
| NM_011663    | Zrsr1   | 51 |
| NM_013489    | Cd84    | 51 |
| NM_015800    | Crim1   | 51 |
| NM_018750    | Rassf5  | 51 |
| NM_018753    | Ywhab   | 51 |
| NM_018822    | Sgsh    | 51 |
| NM_019732    | Runx3   | 51 |
| NM_019764    | Amot12  | 51 |
| NM_019921    | Akap10  | 51 |
| NM_019929    | Sumo3   | 51 |
| NM_020333    | Slc12a5 | 51 |
| NM_023799    | Mgea5   | 51 |
| NM_023906    | Asb3    | 51 |
| NM_024190    | Chmp1b  | 51 |
| NM_024207    | Der11   | 51 |
| NM_025275    | Amz2    | 51 |
| NM_025822    | Rsrc1   | 51 |
| NM_026032    | Lsm1    | 51 |
| NM_026278    | Lrp2bp  | 51 |
| NM_026577    | Ar113b  | 51 |
| NM_027545    | Cwf1912 | 51 |
| NM_028721    | Nphp3   | 51 |
| NM_028802    | Gpcpd1  | 51 |

|              |               |    |
|--------------|---------------|----|
| NM_029210    | Sv2c          | 51 |
| NM_029364    | Gns           | 51 |
| NM_029478    | Vmp1          | 51 |
| NM_029536    | Gpr165        | 51 |
| NM_029847    | Arsk          | 51 |
| NM_031156    | Ide           | 51 |
| NM_053096    | Cml2          | 51 |
| NM_080562    | Ubox5         | 51 |
| NM_133829    | Mfsd6         | 51 |
| NM_134041    | 4930427A07Rik | 51 |
| NM_138741    | Sdpr          | 51 |
| NM_139226    | Onecut3       | 51 |
| NM_144807    | Chpt1         | 51 |
| NM_144810    | Klhdc8a       | 51 |
| NM_145475    | Cerk          | 51 |
| NM_145542    | Ahcy11        | 51 |
| NM_146090    | Zadh2         | 51 |
| NM_146148    | C8a           | 51 |
| NM_146252    | Tbc1d13       | 51 |
| NM_148673    | Slu7          | 51 |
| NM_172477    | Dennd2a       | 51 |
| NM_172517    | Rbbp5         | 51 |
| NM_172671    | Lgr4          | 51 |
| NM_172741    | 4931406P16Rik | 51 |
| NM_172803    | Dock4         | 51 |
| NM_172877    | Pramef8       | 51 |
| NM_173026    | Zbtb11        | 51 |
| NM_173381    | 6720489N17Rik | 51 |
| NM_175133    | 1110038D17Rik | 51 |
| NM_175134    | Ankrd46       | 51 |
| NM_175185    | Hsd11         | 51 |
| NM_175273    | 2310046006Rik | 51 |
| NM_175316    | Slco2b1       | 51 |
| NM_175334    | Maml1         | 51 |
| NM_175534    | Mrgpre        | 51 |
| NM_175648    | Trim30b       | 51 |
| NM_175649    | Tnfrsf26      | 51 |
| NM_176968    | Nt5dc1        | 51 |
| NM_177630    | Ldoc11        | 51 |
| NM_177743    | Fam198a       | 51 |
| NM_177756    | Glt25d2       | 51 |
| NM_178378    | Iqcg          | 51 |
| NM_178407    | Arap2         | 51 |
| NM_178640    | B3galnt2      | 51 |
| NM_178676    | Entpd3        | 51 |
| NR_004052    | Gm9079        | 51 |
| NR_024327    | Cnot2         | 51 |
| NR_029457    | G530011006Rik | 51 |
| NR_030720    | Gm8989        | 51 |
| NR_033188    | 4931409K22Rik | 51 |
| NR_033547    | Gm10684       | 51 |
| NM_001001602 | Dab2ip        | 50 |
| NM_001003916 | Zc4h2         | 50 |
| NM_001010833 | Mdc1          | 50 |

|              |               |    |
|--------------|---------------|----|
| NM_001029842 | Slc16a6       | 50 |
| NM_001033174 | Osbp          | 50 |
| NM_001037917 | Gm6377        | 50 |
| NM_001038655 | Gng7          | 50 |
| NM_001042558 | Apaf1         | 50 |
| NM_001042652 | Nusap1        | 50 |
| NM_001077190 | Abi1          | 50 |
| NM_001081295 | Arhgef26      | 50 |
| NM_001081358 | Lrrc7         | 50 |
| NM_001109902 | Rnft2         | 50 |
| NM_001122832 | Eps15l1       | 50 |
| NM_001135611 | 3110062M04Rik | 50 |
| NM_001145896 | Gsel          | 50 |
| NM_001159496 | Ppmlb         | 50 |
| NM_001159595 | Ints8         | 50 |
| NM_001159646 | Dut           | 50 |
| NM_001159883 | Dnajb2        | 50 |
| NM_001162494 | Fzd6          | 50 |
| NM_001163358 | Dppa1         | 50 |
| NM_001163387 | Nlgn1         | 50 |
| NM_001163464 | Abi3          | 50 |
| NM_001163660 | Nkd1          | 50 |
| NM_001164272 | Cpsf7         | 50 |
| NM_001164743 | Slc17a3       | 50 |
| NM_001171010 | Slc14a1       | 50 |
| NM_001177647 | Sirpa         | 50 |
| NM_007437    | Aldh3a2       | 50 |
| NM_007453    | Prdx6         | 50 |
| NM_007978    | F8a           | 50 |
| NM_008591    | Met           | 50 |
| NM_008702    | Nlk           | 50 |
| NM_008715    | Ints6         | 50 |
| NM_008772    | P2ry1         | 50 |
| NM_008781    | Pax3          | 50 |
| NM_009256    | Serpinb9      | 50 |
| NM_009433    | Tspyl1        | 50 |
| NM_009547    | Zfp161        | 50 |
| NM_010301    | Gnal1         | 50 |
| NM_010731    | Zbtb7a        | 50 |
| NM_010806    | Mllt4         | 50 |
| NM_011055    | Pde3b         | 50 |
| NM_011643    | Trpc1         | 50 |
| NM_011703    | Vipr1         | 50 |
| NM_011767    | Zfr           | 50 |
| NM_011809    | Ets2          | 50 |
| NM_013508    | Elk3          | 50 |
| NM_013622    | Oprd1         | 50 |
| NM_013632    | Pnp           | 50 |
| NM_013745    | Nufip1        | 50 |
| NM_013830    | Prpf4b        | 50 |
| NM_015755    | Hunk          | 50 |
| NM_019689    | Arid3b        | 50 |
| NM_019935    | Ovol1         | 50 |
| NM_019982    | Sez6l         | 50 |



|           |               |    |
|-----------|---------------|----|
| NM_021537 | Stk25         | 50 |
| NM_023333 | 2210010C04Rik | 50 |
| NM_025666 | Ubr7          | 50 |
| NM_025675 | Atpbd4        | 50 |
| NM_025725 | Ccdc96        | 50 |
| NM_025832 | Naa16         | 50 |
| NM_025979 | Mast1         | 50 |
| NM_025992 | Herc6         | 50 |
| NM_026150 | 4921536K21Rik | 50 |
| NM_026626 | Efcab2        | 50 |
| NM_027355 | Rnf168        | 50 |
| NM_028142 | Nsun4         | 50 |
| NM_028718 | Traf3ip1      | 50 |
| NM_028736 | Grip1         | 50 |
| NM_028737 | 4931406B18Rik | 50 |
| NM_028766 | Tmem43        | 50 |
| NM_028982 | 8430419L09Rik | 50 |
| NM_029457 | Senp2         | 50 |
| NM_030018 | Tmem50b       | 50 |
| NM_053014 | Agpat3        | 50 |
| NM_054060 | Psg25         | 50 |
| NM_054089 | Tgs1          | 50 |
| NM_133729 | 2610018G03Rik | 50 |
| NM_133985 | Oxsrl         | 50 |
| NM_134034 | Smek2         | 50 |
| NM_134095 | Pppde2        | 50 |
| NM_145133 | Tifa          | 50 |
| NM_145217 | Diras1        | 50 |
| NM_145405 | Ubl4          | 50 |
| NM_145430 | BC017647      | 50 |
| NM_145614 | Dlat          | 50 |
| NM_145624 | Zfp709        | 50 |
| NM_145838 | St8sia6       | 50 |
| NM_172402 | Slc25a32      | 50 |
| NM_172554 | Zdhhc17       | 50 |
| NM_172958 | Mtmr12        | 50 |
| NM_173347 | Prune         | 50 |
| NM_173744 | 2610019F03Rik | 50 |
| NM_175194 | Slc25a16      | 50 |
| NM_175274 | Ttyh3         | 50 |
| NM_177001 | 9130023H24Rik | 50 |
| NM_177006 | 3110047P20Rik | 50 |
| NM_177869 | Fam185a       | 50 |
| NM_178686 | Cep120        | 50 |
| NM_178797 | Far2          | 50 |
| NM_178798 | Slc7a6        | 50 |
| NM_183146 | A530054K11Rik | 50 |
| NM_198423 | Bahcc1        | 50 |
| NM_207636 | Fndc3a        | 50 |
| NR_033564 | C030002c11rik | 50 |
| NR_033707 | Zscan4a       | 50 |
| NR_033736 | E330020D12Rik | 50 |
| NR_037622 | Cep57         | 50 |
| NR_038081 | Raver1-fdx11  | 50 |

|              |               |    |
|--------------|---------------|----|
| NM_001004362 | 2610008E11Rik | 49 |
| NM_001013616 | Trim6         | 49 |
| NM_001017525 | Btbd11        | 49 |
| NM_001033311 | Vsig10        | 49 |
| NM_001033439 | Lrch1         | 49 |
| NM_001033543 | I120rb        | 49 |
| NM_001034168 | Ank2          | 49 |
| NM_001039482 | Klh120        | 49 |
| NM_001081073 | Cep76         | 49 |
| NM_001081074 | Alcf          | 49 |
| NM_001081298 | Lphn2         | 49 |
| NM_001081355 | Prdm2         | 49 |
| NM_001081650 | Rgs3          | 49 |
| NM_001083322 | Klrk1         | 49 |
| NM_001083616 | Cacna1d       | 49 |
| NM_001085501 | Ppplr3d       | 49 |
| NM_001099637 | Cep170        | 49 |
| NM_001102423 | Stx16         | 49 |
| NM_001113545 | Limal         | 49 |
| NM_001122595 | A630033H20Rik | 49 |
| NM_001141930 | Ctnnbip1      | 49 |
| NM_001142957 | Zfp955b       | 49 |
| NM_001145898 | BC052040      | 49 |
| NM_001145902 | Arhgap1       | 49 |
| NM_001146292 | Celf4         | 49 |
| NM_001146707 | Nap111        | 49 |
| NM_001160307 | Serpinb10-ps  | 49 |
| NM_001163262 | 4933407C03Rik | 49 |
| NM_001164676 | Zfp229        | 49 |
| NM_001166408 | Rai14         | 49 |
| NM_001177503 | 3830431G21Rik | 49 |
| NM_001177770 | Clcc1         | 49 |
| NM_001178012 | Sfxn3         | 49 |
| NM_001199556 | AW551984      | 49 |
| NM_007564    | Zfp3611       | 49 |
| NM_007729    | Col11a1       | 49 |
| NM_007840    | Ddx5          | 49 |
| NM_008252    | Hmgb2         | 49 |
| NM_008261    | Hnf4a         | 49 |
| NM_008325    | Idua          | 49 |
| NM_008612    | Mnat1         | 49 |
| NM_009029    | Rb1           | 49 |
| NM_009037    | Rcn1          | 49 |
| NM_009523    | Wnt4          | 49 |
| NM_009788    | Calb1         | 49 |
| NM_010008    | Cyp2j6        | 49 |
| NM_010101    | Slpr3         | 49 |
| NM_010167    | Eya4          | 49 |
| NM_010332    | Ednra         | 49 |
| NM_011334    | Clcn4-2       | 49 |
| NM_011499    | Strap         | 49 |
| NM_011656    | Tuft1         | 49 |
| NM_011714    | Baz1b         | 49 |
| NM_011769    | Zim1          | 49 |

|           |               |    |
|-----------|---------------|----|
| NM_011771 | Ikzf3         | 49 |
| NM_011846 | Mmp17         | 49 |
| NM_013552 | Hmmr          | 49 |
| NM_013627 | Pax6          | 49 |
| NM_013660 | Sema4d        | 49 |
| NM_015729 | Acox1         | 49 |
| NM_016809 | Rbm3          | 49 |
| NM_016916 | Blcap         | 49 |
| NM_017468 | Enam          | 49 |
| NM_018811 | Abhd2         | 49 |
| NM_018828 | Fnbp4         | 49 |
| NM_019437 | Rfk           | 49 |
| NM_019552 | Abcb10        | 49 |
| NM_019717 | At12          | 49 |
| NM_021544 | Scn5a         | 49 |
| NM_023048 | Asb4          | 49 |
| NM_023537 | Rab3b         | 49 |
| NM_023670 | Igf2bp3       | 49 |
| NM_024203 | Fam120b       | 49 |
| NM_025783 | Vps24         | 49 |
| NM_025826 | Acadsb        | 49 |
| NM_026186 | Cwc25         | 49 |
| NM_026576 | Etaa1         | 49 |
| NM_026604 | Fam135a       | 49 |
| NM_026932 | Ebna1bp2      | 49 |
| NM_027590 | Ints10        | 49 |
| NM_027904 | Cpn2          | 49 |
| NM_027934 | Rnf180        | 49 |
| NM_028838 | Lrrc2         | 49 |
| NM_028889 | Efhd1         | 49 |
| NM_029709 | Clasp1        | 49 |
| NM_029766 | Dtl           | 49 |
| NM_030179 | Clip4         | 49 |
| NM_031251 | Ctns          | 49 |
| NM_032396 | Kremen1       | 49 |
| NM_053128 | Pcdhb3        | 49 |
| NM_053207 | Egln1         | 49 |
| NM_130879 | Usp48         | 49 |
| NM_133798 | Exd2          | 49 |
| NM_139300 | Mylk          | 49 |
| NM_144539 | Slamf7        | 49 |
| NM_145389 | BC016579      | 49 |
| NM_145925 | Pttglip       | 49 |
| NM_145985 | Arcn1         | 49 |
| NM_153526 | Insig1        | 49 |
| NM_153803 | Glb112        | 49 |
| NM_172823 | Lmln          | 49 |
| NM_172836 | 9930021J03Rik | 49 |
| NM_172987 | Nkain3        | 49 |
| NM_172994 | Ppp2r2c       | 49 |
| NM_173370 | Cds1          | 49 |
| NM_173394 | Ticam2        | 49 |
| NM_173415 | Nyx           | 49 |
| NM_173424 | Zbtb37        | 49 |

|              |               |    |
|--------------|---------------|----|
| NM_175026    | Pyhin1        | 49 |
| NM_175174    | Klh15         | 49 |
| NM_175241    | 1700028K03Rik | 49 |
| NM_175497    | Actb12        | 49 |
| NM_177083    | B430306N03Rik | 49 |
| NM_177606    | Plekhh2       | 49 |
| NM_177647    | Cdnf          | 49 |
| NM_177811    | Zfp459        | 49 |
| NM_177879    | Sdk1          | 49 |
| NM_178618    | Fam83g        | 49 |
| NM_178678    | Lrrtm3        | 49 |
| NM_178882    | D2hgdh        | 49 |
| NM_198017    | Fam175b       | 49 |
| NM_201232    | Nipbl         | 49 |
| NR_003283    | Gm11202       | 49 |
| NR_015462    | AI314831      | 49 |
| NR_027893    | BB123696      | 49 |
| NR_028579    | Gm10649       | 49 |
| NR_033744    | Cbwd1         | 49 |
| NM_001001490 | Oxgr1         | 48 |
| NM_001001880 | Mpz11         | 48 |
| NM_001008230 | Rtp2          | 48 |
| NM_001011874 | Xkr4          | 48 |
| NM_001033268 | Fam120a       | 48 |
| NM_001033288 | Gm106         | 48 |
| NM_001033336 | Abcc4         | 48 |
| NM_001033445 | Fam59a        | 48 |
| NM_001034859 | Gm4841        | 48 |
| NM_001035122 | Golm1         | 48 |
| NM_001037723 | Adcy7         | 48 |
| NM_001038658 | Faim2         | 48 |
| NM_001039157 | Ube2j2        | 48 |
| NM_001039951 | Zfp606        | 48 |
| NM_001045529 | Morc3         | 48 |
| NM_001077661 | Urgcp         | 48 |
| NM_001079814 | Glyr1         | 48 |
| NM_001081235 | Mn1           | 48 |
| NM_001081300 | Tshz1         | 48 |
| NM_001081343 | 3110043021Rik | 48 |
| NM_001081377 | Pcdh9         | 48 |
| NM_001081682 | Gnb11         | 48 |
| NM_001093752 | Srsf11        | 48 |
| NM_001099624 | Rapgef2       | 48 |
| NM_001100449 | Taf4b         | 48 |
| NM_001101431 | 2510049J12Rik | 48 |
| NM_001109043 | Zfp185        | 48 |
| NM_001109749 | Cntn4         | 48 |
| NM_001111324 | Nedd9         | 48 |
| NM_001113474 | Lair1         | 48 |
| NM_001130184 | Phf17         | 48 |
| NM_001134752 | Gm16532       | 48 |
| NM_001143802 | Fam196a       | 48 |
| NM_001146217 | Smoc1         | 48 |
| NM_001159769 | Nr5a2         | 48 |

|              |               |       |    |
|--------------|---------------|-------|----|
| NM_001160016 | Gnb1          |       | 48 |
| NM_001162532 | Fam174b       |       | 48 |
| NM_001164671 | Dnaj1         |       | 48 |
| NM_001170454 | Tada2b        |       | 48 |
| NM_001170866 | Ncald         |       | 48 |
| NM_001171615 | Myt1          |       | 48 |
| NM_001177323 |               | 6-Sep | 48 |
| NM_001190314 | Mfrp          |       | 48 |
| NM_007557    | Bmp7          |       | 48 |
| NM_007651    | Cd53          |       | 48 |
| NM_007691    | Chek1         |       | 48 |
| NM_007805    | Cyb561        |       | 48 |
| NM_007929    | Emp2          |       | 48 |
| NM_008255    | Hmgcr         |       | 48 |
| NM_008371    | I17           |       | 48 |
| NM_008400    | Itgal         |       | 48 |
| NM_009615    | Adam17        |       | 48 |
| NM_009866    | Cdh11         |       | 48 |
| NM_010002    | Cyp2c38       |       | 48 |
| NM_010173    | Faah          |       | 48 |
| NM_010195    | Lgr5          |       | 48 |
| NM_010349    | Grik2         |       | 48 |
| NM_010947    | Ntn3          |       | 48 |
| NM_011023    | Otx1          |       | 48 |
| NM_011223    | Pxn           |       | 48 |
| NM_011596    | Atp6v0a2      |       | 48 |
| NM_011657    | Tulp3         |       | 48 |
| NM_011989    | Slc27a4       |       | 48 |
| NM_013483    | Btn1a1        |       | 48 |
| NM_018778    | Cldn8         |       | 48 |
| NM_019419    | Arl6ipl       |       | 48 |
| NM_019631    | Tmem45a       |       | 48 |
| NM_019733    | Rbpms         |       | 48 |
| NM_019878    | Sult1b1       |       | 48 |
| NM_019980    | Litaf         |       | 48 |
| NM_020332    | Ank           |       | 48 |
| NM_020578    | Ehd3          |       | 48 |
| NM_021293    | Cd33          |       | 48 |
| NM_021299    | Ak3           |       | 48 |
| NM_021435    | Slc35b4       |       | 48 |
| NM_022315    | Smoc2         |       | 48 |
| NM_023625    | Plbd2         |       | 48 |
| NM_024471    | Lias          |       | 48 |
| NM_025613    | Eid1          |       | 48 |
| NM_025912    | 2010011I20Rik |       | 48 |
| NM_025938    | Rpp14         |       | 48 |
| NM_026182    | Mtfr1         |       | 48 |
| NM_027250    | 2010305A19Rik |       | 48 |
| NM_027748    | Taf3          |       | 48 |
| NM_027764    | Rcctb1        |       | 48 |
| NM_027770    | Col24a1       |       | 48 |
| NM_028986    | Gzf1          |       | 48 |
| NM_033314    | Slco2a1       |       | 48 |
| NM_033652    | Lmx1a         |       | 48 |

|              |               |    |
|--------------|---------------|----|
| NM_133365    | Dnahc5        | 48 |
| NM_133765    | Fbxo31        | 48 |
| NM_133907    | Ube3c         | 48 |
| NM_138679    | Ash11         | 48 |
| NM_144556    | Lgi4          | 48 |
| NM_144826    | Utp6          | 48 |
| NM_144867    | Slmo1         | 48 |
| NM_145609    | 8430410K20Rik | 48 |
| NM_145955    | Mcmbp         | 48 |
| NM_153098    | Cd109         | 48 |
| NM_153116    | Gtpbp10       | 48 |
| NM_153389    | Atp10d        | 48 |
| NM_153514    | Rhobtb2       | 48 |
| NM_172849    | 9430031J16Rik | 48 |
| NM_175023    | Rbbp6         | 48 |
| NM_175036    | Leprot        | 48 |
| NM_177385    | Cntlh         | 48 |
| NM_177561    | Usp46         | 48 |
| NM_181322    | Ctcf          | 48 |
| NM_181529    | Syt15         | 48 |
| NM_182809    | Ntrk3         | 48 |
| NM_183147    | Sprn          | 48 |
| NM_194262    | Arid4b        | 48 |
| NM_198018    | Abr           | 48 |
| NM_198962    | Hcrtr2        | 48 |
| NM_199022    | Shc4          | 48 |
| NR_015554    | AI506816      | 48 |
| NR_028585    | Arfrp1        | 48 |
| NR_033537    | Gm10754       | 48 |
| NR_033642    | Gm3230        | 48 |
| NR_038029    | 1700061I17Rik | 48 |
| NM_001001885 | Tmem151a      | 47 |
| NM_001005475 | Iqsec2        | 47 |
| NM_001024604 | Ankrd28       | 47 |
| NM_001025576 | Ccdc141       | 47 |
| NM_001029873 | Unc13a        | 47 |
| NM_001033337 | Ttc38         | 47 |
| NM_001035226 | Xpo1          | 47 |
| NM_001035854 | Ap2b1         | 47 |
| NM_001038587 | Adar          | 47 |
| NM_001039701 | Illrn         | 47 |
| NM_001080548 | Usp6n1        | 47 |
| NM_001081058 | Cdk13         | 47 |
| NM_001081077 | Cwf1911       | 47 |
| NM_001081183 | 1110037F02Rik | 47 |
| NM_001081346 | Rtkn2         | 47 |
| NM_001097644 | Ccnyl1        | 47 |
| NM_001105561 | Gm11545       | 47 |
| NM_001110195 | Echdc1        | 47 |
| NM_001110499 | Canx          | 47 |
| NM_001134767 | Ccdc62        | 47 |
| NM_001142647 | Tmem194b      | 47 |
| NM_001146299 | Sh3rf2        | 47 |
| NM_001161430 | Nxt2          | 47 |

|              |          |    |
|--------------|----------|----|
| NM_001162846 | Phyhip1  | 47 |
| NM_001163496 | Cd160    | 47 |
| NM_001164357 | Slc25a25 | 47 |
| NM_001164792 | Tpbg     | 47 |
| NM_001168318 | Scara5   | 47 |
| NM_001170669 | Pde8b    | 47 |
| NM_001177954 | Rpgr     | 47 |
| NM_001190374 | Adamts13 | 47 |
| NM_001195338 | Bbip1    | 47 |
| NM_001200041 | Gm1078   | 47 |
| NM_001205095 | Gm4944   | 47 |
| NM_001205253 | Thsd1    | 47 |
| NM_007426    | Angpt2   | 47 |
| NM_007555    | Bmp5     | 47 |
| NM_007602    | Capn5    | 47 |
| NM_007945    | Eps8     | 47 |
| NM_008055    | Fzd4     | 47 |
| NM_008224    | Hcfc1    | 47 |
| NM_008866    | Lyplal   | 47 |
| NM_009210    | Hltf     | 47 |
| NM_009498    | Vamp3    | 47 |
| NM_009538    | Plagl1   | 47 |
| NM_009757    | Bmp15    | 47 |
| NM_009914    | Ccr3     | 47 |
| NM_010288    | Gjal     | 47 |
| NM_010439    | Hmgb1    | 47 |
| NM_010559    | Il6ra    | 47 |
| NM_010617    | Kif13a   | 47 |
| NM_010629    | Kifap3   | 47 |
| NM_010700    | Ldlr     | 47 |
| NM_010720    | Lipg     | 47 |
| NM_010892    | Nek2     | 47 |
| NM_010894    | Neurod1  | 47 |
| NM_011057    | Pdgfb    | 47 |
| NM_011163    | Eif2ak2  | 47 |
| NM_011784    | Aplnr    | 47 |
| NM_011787    | Amfr     | 47 |
| NM_011932    | Dappl    | 47 |
| NM_012010    | Eif2s3x  | 47 |
| NM_013505    | Dsc2     | 47 |
| NM_013526    | Gdf6     | 47 |
| NM_013787    | Skp2     | 47 |
| NM_015760    | Nox4     | 47 |
| NM_016694    | Park2    | 47 |
| NM_019421    | Cd320    | 47 |
| NM_019439    | Gabbr1   | 47 |
| NM_019790    | Tmeff2   | 47 |
| NM_021275    | Kcna4    | 47 |
| NM_021521    | Med12    | 47 |
| NM_023042    | Recql    | 47 |
| NM_023635    | Rab27a   | 47 |
| NM_025333    | Sdhaf2   | 47 |
| NM_025461    | Cox16    | 47 |
| NM_025683    | Rpe      | 47 |

|           |               |    |
|-----------|---------------|----|
| NM_025708 | Tmem186       | 47 |
| NM_025864 | Tmem206       | 47 |
| NM_025882 | Pole4         | 47 |
| NM_026176 | Pdcl          | 47 |
| NM_026209 | 1810063B07Rik | 47 |
| NM_026262 | 4930524B15Rik | 47 |
| NM_026396 | Brix1         | 47 |
| NM_026401 | Mrp63         | 47 |
| NM_027435 | Atad2         | 47 |
| NM_028102 | Ddhd2         | 47 |
| NM_028203 | Wdr89         | 47 |
| NM_028320 | Adipor1       | 47 |
| NM_028339 | Tmx1          | 47 |
| NM_028390 | Anln          | 47 |
| NM_028546 | 1700066M21Rik | 47 |
| NM_028808 | P2ry13        | 47 |
| NM_028814 | 2810403A07Rik | 47 |
| NM_028860 | Mtmr3         | 47 |
| NM_028900 | Gcc1          | 47 |
| NM_028976 | Goraspl       | 47 |
| NM_029037 | 4930444A02Rik | 47 |
| NM_029327 | Lymr7         | 47 |
| NM_029337 | Ep400         | 47 |
| NM_029402 | Cul2          | 47 |
| NM_029875 | Slc35e3       | 47 |
| NM_029956 | Mmab          | 47 |
| NM_030687 | Slcola4       | 47 |
| NM_033476 | Tcfcp2        | 47 |
| NM_033604 | Rnf111        | 47 |
| NM_053217 | 2010002M12Rik | 47 |
| NM_054077 | Prelp         | 47 |
| NM_130448 | Pcdh18        | 47 |
| NM_133212 | Tlr8          | 47 |
| NM_133880 | Pafah2        | 47 |
| NM_134096 | Fam19a5       | 47 |
| NM_138599 | Tomm70a       | 47 |
| NM_139134 | Chod1         | 47 |
| NM_145356 | Zbtb7c        | 47 |
| NM_145360 | Idi1          | 47 |
| NM_145432 | Heatr6        | 47 |
| NM_145622 | Zfp71-rs1     | 47 |
| NM_145851 | Cables2       | 47 |
| NM_146104 | Aph1a         | 47 |
| NM_153384 | Clrn1         | 47 |
| NM_153560 | Fam102a       | 47 |
| NM_171826 | Clnd1         | 47 |
| NM_172499 | Mfsd9         | 47 |
| NM_172525 | Arhgap29      | 47 |
| NM_172614 | Tmem44        | 47 |
| NM_172633 | Cbln2         | 47 |
| NM_172645 | AI848100      | 47 |
| NM_172731 | Fgd5          | 47 |
| NM_172853 | Cdh7          | 47 |
| NM_173761 | Ythdf1        | 47 |



|              |               |    |
|--------------|---------------|----|
| NM_175128    | 4930430F08Rik | 47 |
| NM_175189    | Hepacam       | 47 |
| NM_175226    | Rnf139        | 47 |
| NM_175293    | D630023F18Rik | 47 |
| NM_175308    | Mobk12c       | 47 |
| NM_175564    | Tmem169       | 47 |
| NM_177203    | A730037C10Rik | 47 |
| NM_177806    | Prpf39        | 47 |
| NM_178620    | Mfsd11        | 47 |
| NM_178625    | Tmem209       | 47 |
| NM_178668    | Pde12         | 47 |
| NM_178673    | Fstl5         | 47 |
| NM_178759    | Timd4         | 47 |
| NM_183424    | Qrfp          | 47 |
| NM_199029    | Zfp395        | 47 |
| NM_199473    | Col8a2        | 47 |
| NM_201351    | Cybasc3       | 47 |
| NR_015533    | A230057D06Rik | 47 |
| NR_029425    | Rbmx          | 47 |
| NR_037581    | Magix         | 47 |
| NR_038043    | Gm10033       | 47 |
| NM_001001178 | Ccdc148       | 46 |
| NM_001005854 | Gm609         | 46 |
| NM_001012324 | Ecm2          | 46 |
| NM_001012450 | Ankrd6        | 46 |
| NM_001013741 | Ddn           | 46 |
| NM_001017966 | Ddi2          | 46 |
| NM_001025307 | Stx3          | 46 |
| NM_001033156 | Fbxo33        | 46 |
| NM_001033352 | Klh121        | 46 |
| NM_001033654 | Pus10         | 46 |
| NM_001039045 | Pigc          | 46 |
| NM_001039511 | Ivns1abp      | 46 |
| NM_001042503 | Trim71        | 46 |
| NM_001048061 | Hnrnpab       | 46 |
| NM_001080774 | Myo1c         | 46 |
| NM_001081132 | Upf2          | 46 |
| NM_001081195 | Arid4a        | 46 |
| NM_001081329 | Zkscan2       | 46 |
| NM_001081422 | Bod11         | 46 |
| NM_001081960 | Clasp2        | 46 |
| NM_001099738 | Dnajc28       | 46 |
| NM_001113330 | Crx           | 46 |
| NM_001113368 | Ceacam2       | 46 |
| NM_001113392 | Cd247         | 46 |
| NM_001123038 | Eif4a2        | 46 |
| NM_001134384 | Iqsec1        | 46 |
| NM_001136068 | Klrc1         | 46 |
| NM_001142681 | Chid1         | 46 |
| NM_001145957 | Vwa5a         | 46 |
| NM_001159750 | Tceal         | 46 |
| NM_001159908 | Zfand2a       | 46 |
| NM_001162868 | Rab11fip3     | 46 |
| NM_001164477 | Ifih1         | 46 |

|              |               |    |
|--------------|---------------|----|
| NM_001165941 | Nsun6         | 46 |
| NM_001166402 | Tnfaip3       | 46 |
| NM_001169114 | B3gnt2        | 46 |
| NM_001194922 | Cldn18        | 46 |
| NM_001195633 | 5430411K18Rik | 46 |
| NM_001198635 | Mtap7         | 46 |
| NM_001199308 | Gm14440       | 46 |
| NM_001204229 | Clec16a       | 46 |
| NM_001204979 | Sars          | 46 |
| NM_001205241 | Myst4         | 46 |
| NM_007528    | Bcl6b         | 46 |
| NM_007781    | Csf2rb2       | 46 |
| NM_007963    | Mecom         | 46 |
| NM_007998    | Fech          | 46 |
| NM_008079    | Galc          | 46 |
| NM_008485    | Lamc2         | 46 |
| NM_009005    | Rab7          | 46 |
| NM_009189    | Six1          | 46 |
| NM_009190    | Vps4b         | 46 |
| NM_009214    | Sms           | 46 |
| NM_009233    | Sox1          | 46 |
| NM_009298    | Surf6         | 46 |
| NM_009513    | Nrsn1         | 46 |
| NM_009645    | Aicda         | 46 |
| NM_010128    | Emp1          | 46 |
| NM_010181    | Fbn2          | 46 |
| NM_010404    | Hap1          | 46 |
| NM_010500    | Ier5          | 46 |
| NM_010638    | Klf9          | 46 |
| NM_010898    | Nf2           | 46 |
| NM_011019    | Osmr          | 46 |
| NM_011063    | Pea15a        | 46 |
| NM_011447    | Sox8          | 46 |
| NM_011498    | Bhlhe40       | 46 |
| NM_011519    | Sdc1          | 46 |
| NM_011772    | Ikzf4         | 46 |
| NM_011861    | Pacsin1       | 46 |
| NM_011882    | Rnase1        | 46 |
| NM_011936    | Fto           | 46 |
| NM_013925    | Adat1         | 46 |
| NM_015736    | Galnt3        | 46 |
| NM_016690    | Hnrpd1        | 46 |
| NM_016720    | Neu3          | 46 |
| NM_017381    | Zranb2        | 46 |
| NM_017382    | Rab11a        | 46 |
| NM_019413    | Robo1         | 46 |
| NM_019553    | Ddx21         | 46 |
| NM_019758    | Mtch2         | 46 |
| NM_019810    | Slc5a1        | 46 |
| NM_020257    | Clec2i        | 46 |
| NM_020270    | Scamp5        | 46 |
| NM_020557    | Cmpk2         | 46 |
| NM_021342    | Kcne4         | 46 |
| NM_021457    | Fzd1          | 46 |

|           |               |    |
|-----------|---------------|----|
| NM_023200 | Ppp1r7        | 46 |
| NM_023662 | Pcml          | 46 |
| NM_024433 | Mtap          | 46 |
| NM_025449 | Nicn1         | 46 |
| NM_025635 | Zwint         | 46 |
| NM_025705 | Dcbld1        | 46 |
| NM_025897 | Rrp8          | 46 |
| NM_025943 | Dzip1         | 46 |
| NM_026047 | Rnf219        | 46 |
| NM_026175 | Sf3a1         | 46 |
| NM_026194 | 1810074P20Rik | 46 |
| NM_026267 | Necap1        | 46 |
| NM_026313 | Luc713        | 46 |
| NM_026406 | Rnf115        | 46 |
| NM_027349 | Rbm25         | 46 |
| NM_027353 | Cd2bp2        | 46 |
| NM_027514 | Pvr           | 46 |
| NM_028705 | Herc3         | 46 |
| NM_028898 | Rptor         | 46 |
| NM_028974 | Kbtbd13       | 46 |
| NM_029489 | Samd7         | 46 |
| NM_029749 | Usp42         | 46 |
| NM_053077 | Slc45a2       | 46 |
| NM_053107 | Gpr45         | 46 |
| NM_053114 | Pabpc5        | 46 |
| NM_053138 | Pcdhb13       | 46 |
| NM_133167 | Parvb         | 46 |
| NM_133692 | Polr3         | 46 |
| NM_133807 | Lrrc59        | 46 |
| NM_133871 | Ifi44         | 46 |
| NM_134164 | Syt12         | 46 |
| NM_144557 | Myrip         | 46 |
| NM_145354 | Nsun2         | 46 |
| NM_145486 |               | 46 |
| NM_145501 | Pi4k2a        | 46 |
| NM_152811 | Ugt2b1        | 46 |
| NM_153510 | Pilra         | 46 |
| NM_172151 | Zdhhc8        | 46 |
| NM_172298 | Tshz3         | 46 |
| NM_172397 | Limd2         | 46 |
| NM_172524 | Nipal4        | 46 |
| NM_172527 | Nudt15        | 46 |
| NM_172635 | Pat11         | 46 |
| NM_172721 | Fbxw8         | 46 |
| NM_172788 | Sh3rf3        | 46 |
| NM_172890 | Slc6a11       | 46 |
| NM_173446 | Fam155a       | 46 |
| NM_175244 | Hectd3        | 46 |
| NM_175488 | Ccdc38        | 46 |
| NM_175684 | Fchsd1        | 46 |
| NM_175688 | A530099J19Rik | 46 |
| NM_176831 | Ppcdc         | 46 |
| NM_177340 | Synpo         | 46 |
| NM_177670 | Tmem69        | 46 |

2-Mar

|              |               |    |
|--------------|---------------|----|
| NM_177774    | Srsf12        | 46 |
| NM_178071    | Nme7          | 46 |
| NM_178403    | Pus7          | 46 |
| NM_178630    | Agbl3         | 46 |
| NM_178671    | Ubxn10        | 46 |
| NM_178692    | C130074G19Rik | 46 |
| NM_181325    | Slc25a15      | 46 |
| NM_183204    | Rnf182        | 46 |
| NM_183290    | 4921517D22Rik | 46 |
| NM_198022    | Tnrc6c        | 46 |
| NM_207255    | Zfp532        | 46 |
| NR_003518    | Pisd-ps3      | 46 |
| NR_015456    | D7Ert715e     | 46 |
| NR_028376    | A930004D18Rik | 46 |
| NR_033140    | AI427809      | 46 |
| NR_033510    | 1500017E21Rik | 46 |
| NR_033544    | Gm14812       | 46 |
| NR_033745    | 2310028011Rik | 46 |
| NM_001003955 | Rab11fip5     | 45 |
| NM_001012517 | Fut10         | 45 |
| NM_001013811 | Fam169b       | 45 |
| NM_001024606 | Pdp2          | 45 |
| NM_001025582 | Dram2         | 45 |
| NM_001037737 | Arnt          | 45 |
| NM_001039000 | Kif5a         | 45 |
| NM_001077712 | Stag2         | 45 |
| NM_001081016 | Zc3h7b        | 45 |
| NM_001081153 | Unc13c        | 45 |
| NM_001081220 | Gpr179        | 45 |
| NM_001081383 | M113          | 45 |
| NM_001102430 | Arfgef1       | 45 |
| NM_001104530 | Med7          | 45 |
| NM_001113180 | Gria4         | 45 |
| NM_001113246 | Chn1          | 45 |
| NM_001159509 | Pacsin2       | 45 |
| NM_001159637 | Nadk          | 45 |
| NM_001160127 | Smyd1         | 45 |
| NM_001162864 | Ttbk1         | 45 |
| NM_001162884 | Igsf10        | 45 |
| NM_001163170 | Lix11         | 45 |
| NM_001163663 | Rab6          | 45 |
| NM_001164566 | Spats21       | 45 |
| NM_001164575 | Zfp169        | 45 |
| NM_001164724 | I133          | 45 |
| NM_001167767 | 1110057K04Rik | 45 |
| NM_001168525 | Sgms1         | 45 |
| NM_001171026 | Os9           | 45 |
| NM_001172207 | Lrtm2         | 45 |
| NM_001177570 | Zfp616        | 45 |
| NM_001177841 | Otub2         | 45 |
| NM_001198894 | Gpr56         | 45 |
| NM_007485    | Rhod          | 45 |
| NM_007604    | Capza2        | 45 |
| NM_007635    | Ccng2         | 45 |

|           |               |    |
|-----------|---------------|----|
| NM_007659 | Cdk1          | 45 |
| NM_007701 | Vsx2          | 45 |
| NM_008131 | Glul          | 45 |
| NM_008285 | Hrh1          | 45 |
| NM_008467 | Kpna4         | 45 |
| NM_008714 | Notch1        | 45 |
| NM_009009 | Rad21         | 45 |
| NM_009071 | Rock1         | 45 |
| NM_009348 | Tectb         | 45 |
| NM_009628 | Adnp          | 45 |
| NM_009808 | Casp12        | 45 |
| NM_009826 | Rblcc1        | 45 |
| NM_010022 | Dbt           | 45 |
| NM_010110 | Efnb1         | 45 |
| NM_010175 | Fadd          | 45 |
| NM_010437 | Hivep2        | 45 |
| NM_010771 | Matr3         | 45 |
| NM_011039 | Pax7          | 45 |
| NM_011446 | Sox7          | 45 |
| NM_011600 | Tle4          | 45 |
| NM_011941 | Mapkbp1       | 45 |
| NM_013488 | Cd4           | 45 |
| NM_013730 | Slamf1        | 45 |
| NM_013815 | Baz1a         | 45 |
| NM_016977 | Mc4r          | 45 |
| NM_018821 | Socs6         | 45 |
| NM_019769 | 1500003003Rik | 45 |
| NM_021431 | Nudt11        | 45 |
| NM_021782 | I121          | 45 |
| NM_023116 | Cacnb2        | 45 |
| NM_023377 | Stard5        | 45 |
| NM_024468 | Trim39        | 45 |
| NM_025447 | Dimt1         | 45 |
| NM_025594 | Zmat2         | 45 |
| NM_025788 | Nacc1         | 45 |
| NM_025846 | Rras2         | 45 |
| NM_025857 | Aagab         | 45 |
| NM_026000 | Psmc9         | 45 |
| NM_026058 | Lass4         | 45 |
| NM_026114 | Eif2s1        | 45 |
| NM_026141 | Ppil4         | 45 |
| NM_026191 | Dhx40         | 45 |
| NM_026603 | Denr          | 45 |
| NM_026641 | Ift80         | 45 |
| NM_026842 | Ubqln1        | 45 |
| NM_027874 | Csnk1d        | 45 |
| NM_027909 | C2cd21        | 45 |
| NM_027927 | Ints12        | 45 |
| NM_028006 | Tube1         | 45 |
| NM_028264 | Tmem55a       | 45 |
| NM_028536 | 1700054N08Rik | 45 |
| NM_028711 | Slc25a27      | 45 |
| NM_028719 | Cpne4         | 45 |
| NM_029447 | Nln           | 45 |

|              |               |    |
|--------------|---------------|----|
| NM_029880    | Ptgr2         | 45 |
| NM_029933    | Bcl9          | 45 |
| NM_053015    | Mlph          | 45 |
| NM_054098    | Steap4        | 45 |
| NM_078477    | Klf16         | 45 |
| NM_080848    | Wdr5          | 45 |
| NM_130860    | Cdk9          | 45 |
| NM_133835    | Ubac1         | 45 |
| NM_134050    | Rab15         | 45 |
| NM_134072    | Akr1c14       | 45 |
| NM_138944    | Pou4f2        | 45 |
| NM_144518    | 2900011008Rik | 45 |
| NM_145526    | P2rx3         | 45 |
| NM_145741    | Gdf10         | 45 |
| NM_145949    | Ido2          | 45 |
| NM_146017    | Gabrp         | 45 |
| NM_146218    | Rfwd3         | 45 |
| NM_146367    | Olfir976      | 45 |
| NM_152812    | Otud6b        | 45 |
| NM_153133    | Rdh9          | 45 |
| NM_153542    | Lrrc20        | 45 |
| NM_153564    | Gbp5          | 45 |
| NM_153799    | Edc3          | 45 |
| NM_172260    | Cep68         | 45 |
| NM_172268    | Nup214        | 45 |
| NM_172466    | Adamts18      | 45 |
| NM_172555    | Pap0lg        | 45 |
| NM_172690    | N28178        | 45 |
| NM_173007    | Tspan12       | 45 |
| NM_173180    | Pmpca         | 45 |
| NM_173396    | Tgif2         | 45 |
| NM_173429    | Zfp775        | 45 |
| NM_174851    | Il28ra        | 45 |
| NM_175172    | 4930506M07Rik | 45 |
| NM_175213    | Mei4          | 45 |
| NM_175303    | Sall4         | 45 |
| NM_176954    | Celf5         | 45 |
| NM_177130    | Glt28d2       | 45 |
| NM_177253    | Cstf3         | 45 |
| NM_177573    | 9930104L06Rik | 45 |
| NM_177625    | Ttc5          | 45 |
| NM_178695    | Prrg4         | 45 |
| NM_178731    | Lrrtm4        | 45 |
| NM_178883    | Gorab         | 45 |
| NM_178892    | Tiparp        | 45 |
| NM_183216    | Scd4          | 45 |
| NM_198654    | Ns11          | 45 |
| NM_201226    | Lrrc47        | 45 |
| NR_015609    | C86187        | 45 |
| NR_028061    | Gm8615        | 45 |
| NR_033673    | Trim30e-ps1   | 45 |
| NR_038051    | 4930546C10Rik | 45 |
| NM_001004164 | Gnptab        | 44 |
| NM_001008232 | Asap3         | 44 |

|              |               |    |
|--------------|---------------|----|
| NM_001008423 | Gm1568        | 44 |
| NM_001008426 | Gm5531        | 44 |
| NM_001009935 | Txnip         | 44 |
| NM_001025612 | Snx22         | 44 |
| NM_001026212 | Ensa          | 44 |
| NM_001033292 | Espn1         | 44 |
| NM_001033378 | A430078G23Rik | 44 |
| NM_001033421 | Pate2         | 44 |
| NM_001033813 | Zfp872        | 44 |
| NM_001033962 | Ube3a         | 44 |
| NM_001038602 | Marveld2      | 44 |
| NM_001038708 | Cdc42se1      | 44 |
| NM_001039201 | Hdhd2         | 44 |
| NM_001039214 | Mex3c         | 44 |
| NM_001040072 | Nynrin        | 44 |
| NM_001040699 | Mtmr7         | 44 |
| NM_001042725 | Calcr         | 44 |
| NM_001045536 | Zzef1         | 44 |
| NM_001077361 | Fhl1          | 44 |
| NM_001081013 | Rlf           | 44 |
| NM_001081175 | Itpkb         | 44 |
| NM_001081378 | Kidins220     | 44 |
| NM_001081421 | Galnt11       | 44 |
| NM_001081678 | Zfp800        | 44 |
| NM_001110783 | Ank1          | 44 |
| NM_001139503 | Dnlz          | 44 |
| NM_001145192 | A330050F15Rik | 44 |
| NM_001146043 | Gfm2          | 44 |
| NM_001161369 | Ss18          | 44 |
| NM_001162928 | Pom12112      | 44 |
| NM_001164226 | Nrf1          | 44 |
| NM_001168223 | Clec2g        | 44 |
| NM_001170694 | Rcbtb2        | 44 |
| NM_001171002 | Degs2         | 44 |
| NM_001177319 | Tfpi          | 44 |
| NM_001177568 | Gm14420       | 44 |
| NM_001198565 | Sulf1         | 44 |
| NM_001205132 | Yes1          | 44 |
| NM_001205353 | Gramd4        | 44 |
| NM_007417    | Adra2a        | 44 |
| NM_007819    | Cyp3a13       | 44 |
| NM_007901    | Slpr1         | 44 |
| NM_008559    | Mclr          | 44 |
| NM_008959    | Ptdss1        | 44 |
| NM_009065    | Rit2          | 44 |
| NM_009374    | Tgm3          | 44 |
| NM_009391    | Ran           | 44 |
| NM_009458    | Ube2b         | 44 |
| NM_009864    | Cdh1          | 44 |
| NM_010076    | Drd1a         | 44 |
| NM_010100    | Edar          | 44 |
| NM_010290    | Gjd2          | 44 |
| NM_010395    | H2-T10        | 44 |
| NM_010808    | Mmp24         | 44 |

|           |               |    |
|-----------|---------------|----|
| NM_011170 | Prnp          | 44 |
| NM_011256 | Pitpnm2       | 44 |
| NM_011262 | Dpf2          | 44 |
| NM_011339 | Cxcl15        | 44 |
| NM_011396 | Slc22a5       | 44 |
| NM_011439 | Sox13         | 44 |
| NM_011731 | Slc6a20b      | 44 |
| NM_011849 | Nek4          | 44 |
| NM_013461 | Adrala        | 44 |
| NM_013515 | Stom          | 44 |
| NM_013848 | Ermap         | 44 |
| NM_013875 | Pde7b         | 44 |
| NM_013903 | Mmp20         | 44 |
| NM_015730 | Chrna4        | 44 |
| NM_015806 | Mapk6         | 44 |
| NM_015818 | Hs6st1        | 44 |
| NM_016695 | Mpp2          | 44 |
| NM_016917 | Slc40a1       | 44 |
| NM_018798 | Ubqln2        | 44 |
| NM_019837 | Nudt3         | 44 |
| NM_020265 | Dkk2          | 44 |
| NM_021877 | Hr            | 44 |
| NM_021889 | Syt9          | 44 |
| NM_022314 | Tpm3          | 44 |
| NM_025478 | Isoc1         | 44 |
| NM_025824 | Bzw1          | 44 |
| NM_025887 | Rab5a         | 44 |
| NM_025964 | Mettl21a      | 44 |
| NM_025975 | Dynlt3        | 44 |
| NM_026042 | Med29         | 44 |
| NM_026144 | Dhdds         | 44 |
| NM_026375 | Ahctf1        | 44 |
| NM_027264 | Zfp715        | 44 |
| NM_027402 | Fndc5         | 44 |
| NM_027448 | Lca5          | 44 |
| NM_027477 | Zfp398        | 44 |
| NM_027870 | Armex3        | 44 |
| NM_028133 | Egln3         | 44 |
| NM_028231 | Kcnmb2        | 44 |
| NM_028679 | Irak3         | 44 |
| NM_028776 | Scyl3         | 44 |
| NM_028866 | Wdr33         | 44 |
| NM_029349 | 2310035C23Rik | 44 |
| NM_029545 | 6530401N04Rik | 44 |
| NM_029653 | Dapk1         | 44 |
| NM_029792 | B3gat1        | 44 |
| NM_029802 | Arfip2        | 44 |
| NM_029881 | Tmem200a      | 44 |
| NM_029891 | Nkrf          | 44 |
| NM_029909 | C330018D20Rik | 44 |
| NM_029935 | Chst15        | 44 |
| NM_030069 | Fam55b        | 44 |
| NM_031179 | Sf3b1         | 44 |
| NM_133653 | Mat1a         | 44 |



|              |               |    |
|--------------|---------------|----|
| NM_133810    | Stk17b        | 44 |
| NM_134255    | Elov15        | 44 |
| NM_138598    | D11Wsu99e     | 44 |
| NM_144803    | Chrna2        | 44 |
| NM_145364    | Akr1d1        | 44 |
| NM_145447    | Mfsd7c        | 44 |
| NM_145597    | Tmem161a      | 44 |
| NM_146145    | Jak1          | 44 |
| NM_152807    | Ccdc137       | 44 |
| NM_153555    | Dcaf8         | 44 |
| NM_172429    | Smndc1        | 44 |
| NM_172664    | Tlk1          | 44 |
| NM_172718    | Sgsml         | 44 |
| NM_172872    | Kank4         | 44 |
| NM_173395    | Fam132b       | 44 |
| NM_173865    | Slc41a1       | 44 |
| NM_175114    | Trak1         | 44 |
| NM_175141    | 1810030007Rik | 44 |
| NM_175526    | Clec1a        | 44 |
| NM_176840    | Osbpl11       | 44 |
| NM_177469    | Gpr123        | 44 |
| NM_177721    | Ranbp6        | 44 |
| NM_178619    | 1810026J23Rik | 44 |
| NM_178703    | Slc6a1        | 44 |
| NM_178732    | Zfp324        | 44 |
| NM_183116    | 1110021L09Rik | 44 |
| NM_183177    | Zfp811        | 44 |
| NM_199366    | Gal3st2       | 44 |
| NM_207237    | Man1c1        | 44 |
| NR_004051    | Btn15         | 44 |
| NR_015514    | 9330175E14Rik | 44 |
| NR_024097    | Gm14057       | 44 |
| NR_024487    | Uqcc          | 44 |
| NR_027316    | Pdxk-ps       | 44 |
| NR_027876    | Arrdc1        | 44 |
| NR_027905    | LOC106740     | 44 |
| NR_038007    | 9330162B11Rik | 44 |
| NM_001004176 | Mam13         | 43 |
| NM_001008700 | I14ra         | 43 |
| NM_001017983 | Foxred2       | 43 |
| NM_001024539 | Shc2          | 43 |
| NM_001024926 | Cyb5d2        | 43 |
| NM_001025395 | Src           | 43 |
| NM_001025608 | D4Ertd22e     | 43 |
| NM_001029856 | Atad5         | 43 |
| NM_001029934 | Usp32         | 43 |
| NM_001033228 | Itgal         | 43 |
| NM_001033233 | Tmprss11a     | 43 |
| NM_001033254 | Pak6          | 43 |
| NM_001033319 | Ppfial        | 43 |
| NM_001033382 | Cacna2d4      | 43 |
| NM_001033432 | Heca          | 43 |
| NM_001037756 | Brms11        | 43 |
| NM_001037922 | Gm6531        | 43 |

|              |         |       |    |
|--------------|---------|-------|----|
| NM_001039086 | Rapgef1 |       | 43 |
| NM_001042499 | Rab13   |       | 43 |
| NM_001042513 | Txnrd1  |       | 43 |
| NM_001076791 | Zfp874b |       | 43 |
| NM_001077424 | A4gnt   |       | 43 |
| NM_001081412 | Bcr     |       | 43 |
| NM_001110129 | Ppih    |       | 43 |
| NM_001113486 |         | 9-Sep | 43 |
| NM_001122683 | Bdh1    |       | 43 |
| NM_001128606 | Epb4.1  |       | 43 |
| NM_001143776 | Fam13c  |       | 43 |
| NM_001145874 | Muc20   |       | 43 |
| NM_001159555 | Cd36    |       | 43 |
| NM_001163104 | Fam46d  |       | 43 |
| NM_001164630 | Mum111  |       | 43 |
| NM_001167877 | Cyp2c50 |       | 43 |
| NM_001171801 | Gm11818 |       | 43 |
| NM_001177427 | Eid2b   |       | 43 |
| NM_001190974 | Axl     |       | 43 |
| NM_001199347 | Foxp3   |       | 43 |
| NM_007479    | Arf4    |       | 43 |
| NM_007562    | Bnc1    |       | 43 |
| NM_007974    | F2r11   |       | 43 |
| NM_007979    | F9      |       | 43 |
| NM_008275    | Hoxd13  |       | 43 |
| NM_008300    | Hspa4   |       | 43 |
| NM_008423    | Kcnd1   |       | 43 |
| NM_008548    | Man1a   |       | 43 |
| NM_008592    | Foxc1   |       | 43 |
| NM_008748    | Dusp8   |       | 43 |
| NM_008756    | Ocln    |       | 43 |
| NM_008760    | Ogn     |       | 43 |
| NM_008845    | Pip4k2a |       | 43 |
| NM_009520    | Wnt2b   |       | 43 |
| NM_009766    | Brs3    |       | 43 |
| NM_010608    | Kcnk3   |       | 43 |
| NM_011078    | Phf2    |       | 43 |
| NM_011390    | Slc12a7 |       | 43 |
| NM_013471    | Anxa4   |       | 43 |
| NM_013513    | Epb4.2  |       | 43 |
| NM_013724    | Nrk     |       | 43 |
| NM_016797    | Stx7    |       | 43 |
| NM_016854    | Ppp1r3c |       | 43 |
| NM_018810    | Mkrn1   |       | 43 |
| NM_019410    | Pfn2    |       | 43 |
| NM_019571    | Tspan5  |       | 43 |
| NM_019636    | Tbc1d1  |       | 43 |
| NM_019640    | Pitpnb  |       | 43 |
| NM_019650    | Gosr2   |       | 43 |
| NM_019866    | Spib    |       | 43 |
| NM_019963    | Stat2   |       | 43 |
| NM_020507    | Tob2    |       | 43 |
| NM_021356    | Gab1    |       | 43 |
| NM_021451    | Pmaip1  |       | 43 |

|           |               |    |
|-----------|---------------|----|
| NM_023324 | Pel1l         | 43 |
| NM_024181 | Dnajc10       | 43 |
| NM_025287 | Spop          | 43 |
| NM_025296 | Ciaol         | 43 |
| NM_026002 | Mtdh          | 43 |
| NM_026021 | Zmynd19       | 43 |
| NM_026056 | Cap2          | 43 |
| NM_026146 | Eps811        | 43 |
| NM_026166 | Ikbip         | 43 |
| NM_026250 | Gin1          | 43 |
| NM_026254 | Tbc1d23       | 43 |
| NM_026793 | Myct1         | 43 |
| NM_026869 | Pygo2         | 43 |
| NM_027008 | Kctd5         | 43 |
| NM_027244 | Ndufa11       | 43 |
| NM_027799 | Ankrd40       | 43 |
| NM_028450 | Gulp1         | 43 |
| NM_028638 | Gad11         | 43 |
| NM_028639 | Ttc7          | 43 |
| NM_028707 | Psd2          | 43 |
| NM_028716 | Phf19         | 43 |
| NM_028728 | Nfam1         | 43 |
| NM_029103 | Manf          | 43 |
| NM_029249 | 4930547N16Rik | 43 |
| NM_029310 | Fabp12        | 43 |
| NM_029572 | Erp44         | 43 |
| NM_029872 | Hnrnpa0       | 43 |
| NM_030556 | Slc19a3       | 43 |
| NM_030599 | Klrb1b        | 43 |
| NM_031184 | Glis2         | 43 |
| NM_031396 | Cnnm1         | 43 |
| NM_031998 | Tsgal4        | 43 |
| NM_053136 | Pcdhb11       | 43 |
| NM_053247 | Lyve1         | 43 |
| NM_080575 | Acssl         | 43 |
| NM_133931 | Pot1a         | 43 |
| NM_133986 | Tcta          | 43 |
| NM_134115 | Stk38         | 43 |
| NM_134135 | Slc39a3       | 43 |
| NM_144527 | Ccdc21        | 43 |
| NM_145510 | Rabif         | 43 |
| NM_146051 | 3830406C13Rik | 43 |
| NM_148932 | Pom121        | 43 |
| NM_153128 | Klh112        | 43 |
| NM_172253 | Twistnb       | 43 |
| NM_172295 | Mab2113       | 43 |
| NM_172407 | Cdkn2aip      | 43 |
| NM_172511 | Abhd10        | 43 |
| NM_172590 | Wdr41         | 43 |
| NM_172814 | Lrp12         | 43 |
| NM_172824 | Ccdc14        | 43 |
| NM_173372 | Grm6          | 43 |
| NM_175314 | Adamts9       | 43 |
| NM_175372 | Rdh13         | 43 |

|              |               |    |
|--------------|---------------|----|
| NM_175511    | Fam78a        | 43 |
| NM_177171    | Heatr5a       | 43 |
| NM_177191    | Sycp2         | 43 |
| NM_177464    | D19Erttd386e  | 43 |
| NM_177712    | Zfp874a       | 43 |
| NM_178283    | Asb13         | 43 |
| NM_178638    | Tmem108       | 43 |
| NM_178789    | Tmem117       | 43 |
| NM_178791    | E130203B14Rik | 43 |
| NM_178934    | Slc2a12       | 43 |
| NM_181410    | Gtf2h3        | 43 |
| NM_182959    | Slc17a8       | 43 |
| NM_183162    | BC006779      | 43 |
| NM_198214    | Snph          | 43 |
| NM_198865    | Slitrk5       | 43 |
| NM_199143    | Znrf2         | 43 |
| NM_201519    | Map4k5        | 43 |
| NR_026843    | BC024582      | 43 |
| NR_027385    | C87499        | 43 |
| NR_027510    | Lrrc57        | 43 |
| NR_028121    | 4930583H14Rik | 43 |
| NR_028316    | Mdp1          | 43 |
| NR_028385    | Gm10190       | 43 |
| NM_001002846 | Fbx112        | 42 |
| NM_001003933 | Rtn3          | 42 |
| NM_001003948 | Pid1          | 42 |
| NM_001012330 | Zfp238        | 42 |
| NM_001025246 | Trp53i11      | 42 |
| NM_001033427 | Lyg2          | 42 |
| NM_001037134 | Ccne2         | 42 |
| NM_001039185 | Ceacam1       | 42 |
| NM_001039194 | Aifm2         | 42 |
| NM_001039521 | Rrn3          | 42 |
| NM_001042484 | Golga7        | 42 |
| NM_001042501 | Fam133b       | 42 |
| NM_001048250 | 2810008M24Rik | 42 |
| NM_001079847 | Gpr64         | 42 |
| NM_001080550 | Wfdc8         | 42 |
| NM_001081085 | 2010317E24Rik | 42 |
| NM_001081163 | Chsyl         | 42 |
| NM_001081173 | Lrch2         | 42 |
| NM_001081182 | Atp8b2        | 42 |
| NM_001083319 | Ubp1          | 42 |
| NM_001083618 | Tt119         | 42 |
| NM_001098723 | Yy2           | 42 |
| NM_001098836 | Atxn713       | 42 |
| NM_001109750 | Dgcr2         | 42 |
| NM_001110227 | Kcnj13        | 42 |
| NM_001111028 | Kctd9         | 42 |
| NM_001122948 | Tcfap2a       | 42 |
| NM_001136060 | Dpp6          | 42 |
| NM_001141922 | Bean1         | 42 |
| NM_001159850 | Kcnk2         | 42 |
| NM_001161854 | Csdel         | 42 |

|              |           |    |
|--------------|-----------|----|
| NM_001163256 | Fblim1    | 42 |
| NM_001163592 | Nhs11     | 42 |
| NM_001163815 | Vav1      | 42 |
| NM_001172160 | Flrt3     | 42 |
| NM_001190371 | Ankrd29   | 42 |
| NM_001190406 | Gas211    | 42 |
| NM_001204411 | Kcnj11    | 42 |
| NM_007386    | Acol      | 42 |
| NM_007704    | Inadl     | 42 |
| NM_007803    | Ctnn      | 42 |
| NM_007923    | Elk4      | 42 |
| NM_008026    | Fli1      | 42 |
| NM_008036    | Fosb      | 42 |
| NM_008209    | Mr1       | 42 |
| NM_008222    | Hccs      | 42 |
| NM_008370    | Il5ra     | 42 |
| NM_008696    | Map4k4    | 42 |
| NM_008810    | Pdhal     | 42 |
| NM_008916    | Inpp5k    | 42 |
| NM_008967    | Ptgir     | 42 |
| NM_008991    | Abcd3     | 42 |
| NM_009396    | Tnfaip2   | 42 |
| NM_009456    | Ube213    | 42 |
| NM_009471    | Umps      | 42 |
| NM_009856    | Cd83      | 42 |
| NM_009904    | Clgn      | 42 |
| NM_010155    | Erf       | 42 |
| NM_010198    | Fgf11     | 42 |
| NM_010228    | Flt1      | 42 |
| NM_010658    | Mafb      | 42 |
| NM_010687    | Large     | 42 |
| NM_011069    | Pex11b    | 42 |
| NM_011184    | Psma3     | 42 |
| NM_011419    | Kdm5d     | 42 |
| NM_011648    | Tshr      | 42 |
| NM_013531    | Gnb4      | 42 |
| NM_013760    | Dnajb9    | 42 |
| NM_019774    | Akap8     | 42 |
| NM_019798    | Pde4a     | 42 |
| NM_019912    | Ube2d2    | 42 |
| NM_019971    | Pdgfc     | 42 |
| NM_020275    | Tnfrsf10b | 42 |
| NM_021322    | Wdr4      | 42 |
| NM_021429    | Hs1bp3    | 42 |
| NM_021559    | Zfp191    | 42 |
| NM_022327    | Ralb      | 42 |
| NM_023431    | Mum1      | 42 |
| NM_023868    | Ryr2      | 42 |
| NM_025474    | Mrps14    | 42 |
| NM_025669    | Sfrs18    | 42 |
| NM_025811    | Nhlrc2    | 42 |
| NM_026167    | Klh113    | 42 |
| NM_026169    | Frmd8     | 42 |
| NM_026214    | Kctd4     | 42 |

|           |               |    |
|-----------|---------------|----|
| NM_026271 | Fibin         | 42 |
| NM_026353 | Slc48a1       | 42 |
| NM_026496 | Grhl2         | 42 |
| NM_027552 | Kynu          | 42 |
| NM_027897 | Rhpn2         | 42 |
| NM_028922 | Ppapdc2       | 42 |
| NM_029482 | 4930579G24Rik | 42 |
| NM_029688 | Srxn1         | 42 |
| NM_030147 | Brd8          | 42 |
| NM_030165 | Csgalnact2    | 42 |
| NM_030174 | Mctpl         | 42 |
| NM_030743 | Rnf114        | 42 |
| NM_053080 | Aldh1a3       | 42 |
| NM_053196 | Sfxn2         | 42 |
| NM_053272 | Dhcr24        | 42 |
| NM_080641 | Bhlhe23       | 42 |
| NM_133673 | Tor1b         | 42 |
| NM_133737 | Lanc12        | 42 |
| NM_133750 | Fam118a       | 42 |
| NM_133823 | Mmaa          | 42 |
| NM_133869 | Cept1         | 42 |
| NM_134065 | Epdr1         | 42 |
| NM_139309 | Fktn          | 42 |
| NM_145066 | Gpr85         | 42 |
| NM_145598 | Nxn11         | 42 |
| NM_146067 | Cpped1        | 42 |
| NM_152895 | Kdm5b         | 42 |
| NM_172608 | Tmem184b      | 42 |
| NM_172627 | Pggt1b        | 42 |
| NM_172753 | Csgalnact1    | 42 |
| NM_172769 | Sc5d          | 42 |
| NM_172775 | Plxnb1        | 42 |
| NM_172784 | Lrp11         | 42 |
| NM_173866 | Gpt2          | 42 |
| NM_173867 | Rcc2          | 42 |
| NM_175101 | Tmem111       | 42 |
| NM_175406 | Atp6v0d2      | 42 |
| NM_175438 | Aldh4a1       | 42 |
| NM_177036 | Ceacam19      | 42 |
| NM_177084 | Slc9a4        | 42 |
| NM_177151 | Vps13b        | 42 |
| NM_177391 | Fam109b       | 42 |
| NM_177622 | Zfp595        | 42 |
| NM_177790 | Zfp385c       | 42 |
| NM_178399 | 3110035E14Rik | 42 |
| NM_178633 | Klh12         | 42 |
| NM_178662 | Atcay         | 42 |
| NM_178760 | Gpr107        | 42 |
| NM_178768 | Tmem72        | 42 |
| NM_198114 | Dagla         | 42 |
| NM_199032 | Cep135        | 42 |
| NM_207301 | Wrb           | 42 |
| NR_015529 | R74862        | 42 |
| NR_015556 | 2610035D17Rik | 42 |

|              |               |    |
|--------------|---------------|----|
| NR_029443    | 4933407K13Rik | 42 |
| NR_029464    | 5033406009Rik | 42 |
| NR_030782    | Cyp3a25       | 42 |
| NR_033634    | A630075F10Rik | 42 |
| NR_036582    | Dos           | 42 |
| NR_037999    | 4930558J18Rik | 42 |
| NR_038037    | E130307A14Rik | 42 |
| NM_001001180 | Zfp941        | 41 |
| NM_001014399 | Abi3bp        | 41 |
| NM_001031664 | Nudt10        | 41 |
| NM_001033139 | AI846148      | 41 |
| NM_001033209 | Xylb          | 41 |
| NM_001033291 | Usp40         | 41 |
| NM_001033472 | A830080D01Rik | 41 |
| NM_001034882 | Gm5465        | 41 |
| NM_001042607 | Ryk           | 41 |
| NM_001044383 | Ubtf          | 41 |
| NM_001045523 | Bahd1         | 41 |
| NM_001048175 | Adam28        | 41 |
| NM_001048204 | Zfp455        | 41 |
| NM_001079824 | Hnrnph3       | 41 |
| NM_001081080 | Phf3          | 41 |
| NM_001081277 | Ak5           | 41 |
| NM_001081290 | Prrc2c        | 41 |
| NM_001081302 | Trio          | 41 |
| NM_001083927 | Tle3          | 41 |
| NM_001101510 | Susd5         | 41 |
| NM_001109988 | D0H4S114      | 41 |
| NM_001111096 | Lyn           | 41 |
| NM_001111311 | Lrrfip1       | 41 |
| NM_001113529 | Csf1          | 41 |
| NM_001114361 | Eml4          | 41 |
| NM_001126489 | Zfp735        | 41 |
| NM_001141975 | Tpx2          | 41 |
| NM_001159599 | No19          | 41 |
| NM_001162418 | Myef2         | 41 |
| NM_001162489 | Heatr7a       | 41 |
| NM_001162957 | Rsph4a        | 41 |
| NM_001163290 | Adek3         | 41 |
| NM_001163574 | Tjp1          | 41 |
| NM_001164210 | 1110032A04Rik | 41 |
| NM_001164609 | Smpd4         | 41 |
| NM_001164661 | Cyfip1        | 41 |
| NM_001164689 | Gm6710        | 41 |
| NM_001168471 | Dynl12        | 41 |
| NM_001177534 | LOC100271928  | 41 |
| NM_001198949 | Ralbp1        | 41 |
| NM_001199484 | 4931406C07Rik | 41 |
| NM_001205043 | Jarid2        | 41 |
| NM_007624    | Cbx3          | 41 |
| NM_007760    | Crat          | 41 |
| NM_007780    | Csf2rb        | 41 |
| NM_007903    | Edn3          | 41 |
| NM_007922    | Elk1          | 41 |

|           |               |    |
|-----------|---------------|----|
| NM_008764 | Tnfrsf11b     | 41 |
| NM_008891 | Pnn           | 41 |
| NM_008986 | Ptrf          | 41 |
| NM_009032 | Rbm4          | 41 |
| NM_009223 | Snn           | 41 |
| NM_009307 | Syt2          | 41 |
| NM_009331 | Tcf7          | 41 |
| NM_009560 | Zfp60         | 41 |
| NM_009707 | Arhgap6       | 41 |
| NM_009809 | Casp14        | 41 |
| NM_009872 | Cdk5r2        | 41 |
| NM_009886 | Celsr1        | 41 |
| NM_010259 | Gbp1          | 41 |
| NM_010369 | Gypa          | 41 |
| NM_010703 | Lef1          | 41 |
| NM_010813 | Mnt           | 41 |
| NM_010834 | Mstn          | 41 |
| NM_011087 | Piral         | 41 |
| NM_011089 | Pira2         | 41 |
| NM_011201 | Ptpn1         | 41 |
| NM_011350 | Sema4f        | 41 |
| NM_011931 | Rfwd2         | 41 |
| NM_013818 | Gtpbp1        | 41 |
| NM_015745 | Rbp3          | 41 |
| NM_016972 | Slc7a8        | 41 |
| NM_018741 | Igfbp11       | 41 |
| NM_019988 | Mlst8         | 41 |
| NM_019994 | Ralgapa1      | 41 |
| NM_019998 | Alg2          | 41 |
| NM_020508 | Brd4          | 41 |
| NM_021422 | Dnaja4        | 41 |
| NM_021495 | Pvrl3         | 41 |
| NM_021535 | Smu1          | 41 |
| NM_022015 | Taf8          | 41 |
| NM_023141 | Tor3a         | 41 |
| NM_025279 | Hnrnpk        | 41 |
| NM_025685 | Col27a1       | 41 |
| NM_025829 | Eif4e3        | 41 |
| NM_026009 | Ccdc47        | 41 |
| NM_026218 | Fgfr1op2      | 41 |
| NM_026417 | Yipf4         | 41 |
| NM_026959 | Stx18         | 41 |
| NM_027035 | 1700001L19Rik | 41 |
| NM_027324 | Sfxn1         | 41 |
| NM_027442 | Ddo           | 41 |
| NM_028173 | Tram1         | 41 |
| NM_028319 | Zfp518a       | 41 |
| NM_028428 | Fut11         | 41 |
| NM_028792 | Josd1         | 41 |
| NM_028971 | 4933430H15Rik | 41 |
| NM_029074 | Tmem188       | 41 |
| NM_029331 | 1700019G17Rik | 41 |
| NM_029645 | Gatc          | 41 |
| NM_029976 | Cdkn2aipn1    | 41 |



|           |               |    |
|-----------|---------------|----|
| NM_030713 | Zfp202        | 41 |
| NM_031183 | Sp6           | 41 |
| NM_052994 | Spock2        | 41 |
| NM_054097 | Pip4k2c       | 41 |
| NM_080458 | Bsnd          | 41 |
| NM_080555 | Ppap2b        | 41 |
| NM_133948 | Psip1         | 41 |
| NM_138949 | Zfp286        | 41 |
| NM_139138 | Emr4          | 41 |
| NM_139308 | Stard7        | 41 |
| NM_144523 | Zfp622        | 41 |
| NM_145129 | Chrna3        | 41 |
| NM_145456 | Zswim6        | 41 |
| NM_146016 | Eml6          | 41 |
| NM_148949 | Tdpoz1        | 41 |
| NM_153079 | Nmur2         | 41 |
| NM_153408 | Neur13        | 41 |
| NM_153420 | Acpl2         | 41 |
| NM_172616 | C330027C09Rik | 41 |
| NM_172632 | Mapk4         | 41 |
| NM_172663 | Epc2          | 41 |
| NM_172706 | 9330182L06Rik | 41 |
| NM_172773 | Slc17a5       | 41 |
| NM_172844 | Fmo9          | 41 |
| NM_172931 | Hsf3          | 41 |
| NM_172993 | Zfp512        | 41 |
| NM_173432 | Pskh1         | 41 |
| NM_175106 | Tmem177       | 41 |
| NM_175126 | Zcchc3        | 41 |
| NM_175407 | Sobp          | 41 |
| NM_175484 | Coro2b        | 41 |
| NM_175524 | C130060K24Rik | 41 |
| NM_176996 | Smo           | 41 |
| NM_177024 | Tmprss11bn1   | 41 |
| NM_177328 | Grm7          | 41 |
| NM_177356 | Lamp3         | 41 |
| NM_177376 | Myo3b         | 41 |
| NM_177393 | Nalc1         | 41 |
| NM_177769 | Elmod1        | 41 |
| NM_177909 | Slc9a9        | 41 |
| NM_178627 | Poldip3       | 41 |
| NM_178628 | At11          | 41 |
| NM_178648 | Ubxn8         | 41 |
| NM_178727 | D630039A03Rik | 41 |
| NM_178766 | Slc25a40      | 41 |
| NM_183021 | Thada         | 41 |
| NM_183160 | E030010A14Rik | 41 |
| NM_183180 | Tspan18       | 41 |
| NM_198023 | Rcor1         | 41 |
| NM_198626 | AI480653      | 41 |
| NM_207031 | Ano7          | 41 |
| NR_003363 | Gm6548        | 41 |
| NR_024085 | BC006965      | 41 |
| NR_024331 | 1700008J07Rik | 41 |

|              |               |    |
|--------------|---------------|----|
| NR_033524    | Gm11529       | 41 |
| NR_033560    | 9230115E21Rik | 41 |
| NR_033610    | Gm12633       | 41 |
| NR_033629    | BC021767      | 41 |
| NM_001004148 | Slc13a5       | 40 |
| NM_001008550 | Zfyve26       | 40 |
| NM_001012309 | Ccdc55        | 40 |
| NM_001013379 | Zfp930        | 40 |
| NM_001037539 | Prok2         | 40 |
| NM_001037711 | Cgn           | 40 |
| NM_001077410 | Gimap8        | 40 |
| NM_001080925 | Ragef11       | 40 |
| NM_001080944 | Atp8b4        | 40 |
| NM_001080964 | Sp2           | 40 |
| NM_001080999 | Trmt2a        | 40 |
| NM_001081028 | Sipa113       | 40 |
| NM_001081051 | D130043K22Rik | 40 |
| NM_001081092 | Taf4a         | 40 |
| NM_001081224 | Prr16         | 40 |
| NM_001081264 | Alg6          | 40 |
| NM_001085503 | Aadacl3       | 40 |
| NM_001111100 | Lipa          | 40 |
| NM_001113187 | Khdc1b        | 40 |
| NM_001113553 | Irak2         | 40 |
| NM_001123386 | Cdyl          | 40 |
| NM_001130443 | Hras1         | 40 |
| NM_001142916 | Plod2         | 40 |
| NM_001145779 | Kif2a         | 40 |
| NM_001145827 | Stk40         | 40 |
| NM_001145875 | 9530008L14Rik | 40 |
| NM_001146687 | Pip5k1c       | 40 |
| NM_001159941 | Kctd10        | 40 |
| NM_001161329 | Nol11         | 40 |
| NM_001162410 | Chuk          | 40 |
| NM_001163263 | Rnf20         | 40 |
| NM_001163346 | Cdc42ep4      | 40 |
| NM_001163480 | Neurl1a       | 40 |
| NM_001163518 | 2410075B13Rik | 40 |
| NM_001163640 | Chn2          | 40 |
| NM_001164186 | Barhl1        | 40 |
| NM_001164818 | 0610011L14Rik | 40 |
| NM_001166394 | 4931428F04Rik | 40 |
| NM_001167829 | Fam45a        | 40 |
| NM_001167860 | Wipf3         | 40 |
| NM_001168516 | Zdhhc24       | 40 |
| NM_001173550 | C5ar1         | 40 |
| NM_001177609 | Ube2i         | 40 |
| NM_001177773 | Fbxw7         | 40 |
| NM_001205385 | Actr3         | 40 |
| NM_007542    | Bgn           | 40 |
| NM_007755    | Cpeb1         | 40 |
| NM_007757    | Cpox          | 40 |
| NM_007941    | Stx2          | 40 |
| NM_008060    | Ganab         | 40 |

|           |               |    |
|-----------|---------------|----|
| NM_008320 | Irf8          | 40 |
| NM_008331 | Ifit1         | 40 |
| NM_008576 | Abcc1         | 40 |
| NM_008682 | Nedd1         | 40 |
| NM_008847 | Pip5k1a       | 40 |
| NM_008879 | Lcp1          | 40 |
| NM_008962 | Ptgdr         | 40 |
| NM_009145 | Nptn          | 40 |
| NM_009497 | Vamp2         | 40 |
| NM_009501 | Vax1          | 40 |
| NM_009597 | Accn2         | 40 |
| NM_009968 | Cryz          | 40 |
| NM_010208 | Fgr           | 40 |
| NM_011109 | Pla2g2d       | 40 |
| NM_011486 | Stat3         | 40 |
| NM_011748 | Zfp14         | 40 |
| NM_011923 | Angpt12       | 40 |
| NM_011964 | Psg19         | 40 |
| NM_013503 | Drd5          | 40 |
| NM_013701 | Ugt1a2        | 40 |
| NM_013822 | Jag1          | 40 |
| NM_013900 | Mfi2          | 40 |
| NM_015790 | Icos1         | 40 |
| NM_016805 | Hnrnpu        | 40 |
| NM_016866 | Stk39         | 40 |
| NM_017463 | Pbx2          | 40 |
| NM_018881 | Fmo2          | 40 |
| NM_018883 | Camkk1        | 40 |
| NM_019491 | Rala          | 40 |
| NM_019663 | Pias1         | 40 |
| NM_019715 | Kcmf1         | 40 |
| NM_019817 | Copz1         | 40 |
| NM_021345 | Ptplad1       | 40 |
| NM_023146 | Ranbp17       | 40 |
| NM_023672 | Ssbp3         | 40 |
| NM_024479 | Wbscr27       | 40 |
| NM_025311 | D14Ert449e    | 40 |
| NM_025479 | 2810021B07Rik | 40 |
| NM_025483 | Senp7         | 40 |
| NM_025668 | Spcs2         | 40 |
| NM_025679 | Sike1         | 40 |
| NM_025734 | Kcng4         | 40 |
| NM_025741 | Trpd5213      | 40 |
| NM_025781 | Tmem170       | 40 |
| NM_025815 | Cpne8         | 40 |
| NM_025863 | Trim59        | 40 |
| NM_025980 | Nrarp         | 40 |
| NM_026005 | 2610301B20Rik | 40 |
| NM_026137 | Wdr13         | 40 |
| NM_026180 | Abcg8         | 40 |
| NM_026321 | Fam174a       | 40 |
| NM_026403 | 2610027L16Rik | 40 |
| NM_027136 | Ovca2         | 40 |
| NM_027409 | Mospd1        | 40 |

|           |               |    |
|-----------|---------------|----|
| NM_027420 | 2610034B18Rik | 40 |
| NM_027439 | Atp6ap2       | 40 |
| NM_027873 | Ubiad1        | 40 |
| NM_027995 | Paqr7         | 40 |
| NM_028018 | 2400003C14Rik | 40 |
| NM_028258 | Dzip11        | 40 |
| NM_028604 | Trmt11        | 40 |
| NM_028810 | Rnd3          | 40 |
| NM_028820 | 1700017B05Rik | 40 |
| NM_029570 | Atp11b        | 40 |
| NM_030226 | 9130019022Rik | 40 |
| NM_030595 | Nbea          | 40 |
| NM_030721 | Acox3         | 40 |
| NM_030889 | Sorcs2        | 40 |
| NM_031197 | Slc2a2        | 40 |
| NM_033217 | Ngfr          | 40 |
| NM_033570 | Cnnm4         | 40 |
| NM_053110 | Gpnb          | 40 |
| NM_080453 | Mmp28         | 40 |
| NM_080558 | Ssfa2         | 40 |
| NM_080636 | Hars2         | 40 |
| NM_133251 | Vgll1         | 40 |
| NM_133738 | Antxr2        | 40 |
| NM_133838 | Ehd4          | 40 |
| NM_138584 | Spg21         | 40 |
| NM_139061 | Vps54         | 40 |
| NM_144534 | Tmem38a       | 40 |
| NM_145079 | Ugt1a6a       | 40 |
| NM_145355 | Rnf185        | 40 |
| NM_145437 | Cd3001d       | 40 |
| NM_145554 | Ldlrap1       | 40 |
| NM_145625 | Eif4b         | 40 |
| NM_145928 | Tspan14       | 40 |
| NM_145964 | Aplar         | 40 |
| NM_146003 | Senp6         | 40 |
| NM_146131 | Pbxip1        | 40 |
| NM_146153 | Thrap3        | 40 |
| NM_153125 | Sec16a        | 40 |
| NM_153166 | Cpne5         | 40 |
| NM_153541 | Zbtb8b        | 40 |
| NM_153801 | Tecr1         | 40 |
| NM_172435 | P2ry10        | 40 |
| NM_172462 | Zfp11         | 40 |
| NM_172740 | Zfp420        | 40 |
| NM_172743 | Plekha7       | 40 |
| NM_172758 | Slc38a7       | 40 |
| NM_172777 | Gbp9          | 40 |
| NM_172815 | Rspo2         | 40 |
| NM_172858 | Pak7          | 40 |
| NM_173371 | H6pd          | 40 |
| NM_173425 | Fam124b       | 40 |
| NM_173769 | Zfp641        | 40 |
| NM_175003 | Arhgap44      | 40 |
| NM_175089 | Nek1          | 40 |

|              |               |    |
|--------------|---------------|----|
| NM_175187    | Tmem161b      | 40 |
| NM_175427    | Fam163b       | 40 |
| NM_176957    | Nckap5        | 40 |
| NM_177663    | Isg2012       | 40 |
| NM_177705    | 4932411N23Rik | 40 |
| NM_177716    | AI836003      | 40 |
| NM_177744    | Apol10a       | 40 |
| NM_178714    | Lrfn5         | 40 |
| NM_178752    | D330012F22Rik | 40 |
| NM_178935    | Txlng         | 40 |
| NM_181413    | Anks1         | 40 |
| NM_181415    | Atrnl1        | 40 |
| NM_182995    | 6330503K22Rik | 40 |
| NM_183173    | Ankrd43       | 40 |
| NM_183322    | Khdc1a        | 40 |
| NM_201641    | Ugt1a10       | 40 |
| NM_201642    | Ugt1a7c       | 40 |
| NM_201643    | Ugt1a5        | 40 |
| NM_201644    | Ugt1a9        | 40 |
| NM_201645    | Ugt1a1        | 40 |
| NM_207202    | Ccdc120       | 40 |
| NR_027836    | D730001G18Rik | 40 |
| NR_028424    | Gm2176        | 40 |
| NR_033217    | BC030870      | 40 |
| NR_038040    | C730027H18Rik | 40 |
| NM_001001176 | Taf9b         | 39 |
| NM_001001297 | Thns11        | 39 |
| NM_001001491 | Tpm4          | 39 |
| NM_001004153 | AU018091      | 39 |
| NM_001013386 | Ras110b       | 39 |
| NM_001025599 | Trim26        | 39 |
| NM_001029841 | Slc           | 39 |
| NM_001033205 | Zfp575        | 39 |
| NM_001033242 | Cln5          | 39 |
| NM_001033346 | Lrrc55        | 39 |
| NM_001033410 | Gm757         | 39 |
| NM_001033446 | Gm949         | 39 |
| NM_001038492 | Ctsa          | 39 |
| NM_001042710 | Prss57        | 39 |
| NM_001045559 | Zfp952        | 39 |
| NM_001077364 | Tsc22d3       | 39 |
| NM_001077398 | Ldb2          | 39 |
| NM_001081045 | 1700081L11Rik | 39 |
| NM_001081263 | Slc44a5       | 39 |
| NM_001081425 | Rbm24         | 39 |
| NM_001082412 | Mcart6        | 39 |
| NM_001109747 | Cenpw         | 39 |
| NM_001110212 | Gigyf2        | 39 |
| NM_001113413 | Rnf13         | 39 |
| NM_001114096 | Smarcc2       | 39 |
| NM_001136075 | Numb          | 39 |
| NM_001144855 | Ppfia4        | 39 |
| NM_001146000 | Zfp710        | 39 |
| NM_001146176 | Max           | 39 |

|              |           |    |
|--------------|-----------|----|
| NM_001159344 | Casz1     | 39 |
| NM_001161782 | Trim32    | 39 |
| NM_001162524 | Ceacam12  | 39 |
| NM_001163032 | Synpr     | 39 |
| NM_001163454 | Prorsdl   | 39 |
| NM_001164742 | Serpinalf | 39 |
| NM_001164838 | Lrrfip2   | 39 |
| NM_001166031 | Mrps2     | 39 |
| NM_001166249 | Mgl1      | 39 |
| NM_001166391 | F13a1     | 39 |
| NM_001167994 | Trmt2b    | 39 |
| NM_001168655 | Socs2     | 39 |
| NM_001177589 | Gm3985    | 39 |
| NM_001195413 | Cngb1     | 39 |
| NM_001199141 | Zmynd11   | 39 |
| NM_001199330 | AI987944  | 39 |
| NM_001201569 | Atp9b     | 39 |
| NM_001205227 | Cyb5r2    | 39 |
| NM_001205345 | Sun2      | 39 |
| NM_007559    | Bmp8b     | 39 |
| NM_007575    | Ciita     | 39 |
| NM_007641    | Ms4a1     | 39 |
| NM_007970    | Ezh1      | 39 |
| NM_008270    | Hoxb9     | 39 |
| NM_008348    | Il10ra    | 39 |
| NM_008424    | Kcne1     | 39 |
| NM_008551    | Mapkapk2  | 39 |
| NM_008590    | Mest      | 39 |
| NM_008971    | Twf1      | 39 |
| NM_008983    | Ptprk     | 39 |
| NM_009373    | Tgm2      | 39 |
| NM_009442    | Ttf1      | 39 |
| NM_009483    | Kdm6a     | 39 |
| NM_009486    | Vmn2r89   | 39 |
| NM_009516    | Wee1      | 39 |
| NM_009621    | Adamts1   | 39 |
| NM_009828    | Ccna2     | 39 |
| NM_009861    | Cdc42     | 39 |
| NM_009899    | Clca1     | 39 |
| NM_009937    | Colq      | 39 |
| NM_010203    | Fgf5      | 39 |
| NM_010207    | Fgfr2     | 39 |
| NM_010269    | Gdap2     | 39 |
| NM_010305    | Gnail     | 39 |
| NM_010415    | Hbegf     | 39 |
| NM_010426    | Foxf1a    | 39 |
| NM_010466    | Hoxc8     | 39 |
| NM_010597    | Kcnab1    | 39 |
| NM_010613    | Khsrp     | 39 |
| NM_010774    | Mbd4      | 39 |
| NM_010887    | Ndufs4    | 39 |
| NM_011141    | Pou3f1    | 39 |
| NM_011213    | Ptprf     | 39 |
| NM_011274    | C80913    | 39 |

|           |               |    |
|-----------|---------------|----|
| NM_011404 | Slc7a5        | 39 |
| NM_011715 | Wdr1          | 39 |
| NM_013865 | Ndr3          | 39 |
| NM_015814 | Dkk3          | 39 |
| NM_016675 | Cldn2         | 39 |
| NM_016802 | Rhoa          | 39 |
| NM_016859 | Bysl          | 39 |
| NM_018729 | Cd244         | 39 |
| NM_018861 | Slc1a4        | 39 |
| NM_018876 | Fut2          | 39 |
| NM_019765 | Clip1         | 39 |
| NM_021395 | Hyou1         | 39 |
| NM_021433 | Stx6          | 39 |
| NM_021509 | Moxd1         | 39 |
| NM_022028 | Sav1          | 39 |
| NM_022811 | Polr1e        | 39 |
| NM_023612 | Esm1          | 39 |
| NM_024495 | Car13         | 39 |
| NM_025762 | 4933434E20Rik | 39 |
| NM_025900 | Dek           | 39 |
| NM_026455 | Fam32a        | 39 |
| NM_027236 | Eif1ad        | 39 |
| NM_028317 | 2810030E01Rik | 39 |
| NM_028410 | Prkrir        | 39 |
| NM_028771 | Ccdc97        | 39 |
| NM_028788 | 1300002K09Rik | 39 |
| NM_028833 | Iqce          | 39 |
| NM_028906 | Dpp8          | 39 |
| NM_028933 | Fam134c       | 39 |
| NM_029578 | Tgds          | 39 |
| NM_080287 | Elmo2         | 39 |
| NM_130893 | Scrt1         | 39 |
| NM_133925 | Rbm28         | 39 |
| NM_133962 | Arhgef18      | 39 |
| NM_134054 | 1110002B05Rik | 39 |
| NM_134082 | Farpl         | 39 |
| NM_139295 | Mcf2d         | 39 |
| NM_144522 | Tbc1d10b      | 39 |
| NM_145495 | Rin1          | 39 |
| NM_145528 | Atg13         | 39 |
| NM_145551 | Slc5a9        | 39 |
| NM_145557 | 9430015G10Rik | 39 |
| NM_145711 | Tox           | 39 |
| NM_145839 | Rasgef1b      | 39 |
| NM_146115 | A830007P12Rik | 39 |
| NM_146207 | Cul4a         | 39 |
| NM_147049 | Olfir658      | 39 |
| NM_152823 | Unc5c1        | 39 |
| NM_153092 | Nup12         | 39 |
| NM_153093 | AF366264      | 39 |
| NM_153387 | Tubgcp4       | 39 |
| NM_172301 | Ccnb1         | 39 |
| NM_172338 | Dnajc16       | 39 |
| NM_172416 | Ostm1         | 39 |

|              |               |    |
|--------------|---------------|----|
| NM_172569    | Unk           | 39 |
| NM_172694    | Megf9         | 39 |
| NM_172709    | Otop1         | 39 |
| NM_172717    | Chfr          | 39 |
| NM_172766    | Nfrkb         | 39 |
| NM_172771    | Dmx12         | 39 |
| NM_172881    | Ugt2b35       | 39 |
| NM_172946    | Krt222        | 39 |
| NM_174874    | Atg4b         | 39 |
| NM_175021    | Samd4b        | 39 |
| NM_175247    | Zfp28         | 39 |
| NM_175393    | 4930555G01Rik | 39 |
| NM_175455    | Ankrd34b      | 39 |
| NM_177073    | Relt          | 39 |
| NM_177381    | Cog3          | 39 |
| NM_178110    | Trim62        | 39 |
| NM_178594    | Vtcn1         | 39 |
| NM_178717    | Rxfp3         | 39 |
| NM_183031    | Gpr183        | 39 |
| NM_183034    | Plekhm1       | 39 |
| NM_183158    | Cyp2ab1       | 39 |
| NM_198601    | Trim52        | 39 |
| NM_199008    | Cox11         | 39 |
| NM_207261    | Kcnk18        | 39 |
| NM_207278    | Tigd4         | 39 |
| NR_003202    | Pinc          | 39 |
| NR_003555    | Vmn2r29       | 39 |
| NR_004448    | 4930448K20Rik | 39 |
| NR_015470    | 2610203C22Rik | 39 |
| NR_015478    | 5730422E09Rik | 39 |
| NR_027817    | 1500011B03Rik | 39 |
| NR_037153    | Chkb          | 39 |
| NR_037693    | 2700046A07Rik | 39 |
| NM_001001182 | Baz2b         | 38 |
| NM_001008501 | Zfp760        | 38 |
| NM_001024617 | Inpp4b        | 38 |
| NM_001033135 | Rnf149        | 38 |
| NM_001033158 | Ras112        | 38 |
| NM_001033219 | Slc45a4       | 38 |
| NM_001033389 | Fubp3         | 38 |
| NM_001033426 | Grxcr2        | 38 |
| NM_001039509 | Pnkd          | 38 |
| NM_001039646 | Gbp10         | 38 |
| NM_001040690 | Rap1gds1      | 38 |
| NM_001042714 | Ankdd1b       | 38 |
| NM_001044697 | Zfp2          | 38 |
| NM_001080388 | Mark2         | 38 |
| NM_001080743 | Grk4          | 38 |
| NM_001081006 | Et14          | 38 |
| NM_001081347 | Rhobtbl1      | 38 |
| NM_001081373 | Cep164        | 38 |
| NM_001083125 | Lhx6          | 38 |
| NM_001085522 | Gm13251       | 38 |
| NM_001102444 | Add1          | 38 |



|              |         |    |
|--------------|---------|----|
| NM_001110794 | Anxa7   | 38 |
| NM_001112699 | Cyth1   | 38 |
| NM_001115132 | Ncaph2  | 38 |
| NM_001135149 | Slc39a8 | 38 |
| NM_001142781 | Fam188b | 38 |
| NM_001159376 | Dusp15  | 38 |
| NM_001160399 | Ccdc112 | 38 |
| NM_001163514 | Ext12   | 38 |
| NM_001164355 | Ska1    | 38 |
| NM_001165965 | Fndc7   | 38 |
| NM_001166206 | Erv3    | 38 |
| NM_001167743 | Slfn8   | 38 |
| NM_001168354 | Kcnj1   | 38 |
| NM_001172098 | Strn3   | 38 |
| NM_001177374 | Ubr2    | 38 |
| NM_001177552 | Bfar    | 38 |
| NM_001177696 | Ablim2  | 38 |
| NM_001204152 | Clqtnf6 | 38 |
| NM_007395    | Acvr1b  | 38 |
| NM_007538    | Opn1sw  | 38 |
| NM_007935    | Epc1    | 38 |
| NM_008121    | Gja5    | 38 |
| NM_008274    | Hoxd12  | 38 |
| NM_008332    | Ifit2   | 38 |
| NM_008372    | I17r    | 38 |
| NM_008656    | Myf5    | 38 |
| NM_008770    | Cldn11  | 38 |
| NM_008888    | Phox2b  | 38 |
| NM_009007    | Rac1    | 38 |
| NM_009416    | Tpm2    | 38 |
| NM_009421    | Traf1   | 38 |
| NM_009422    | Traf2   | 38 |
| NM_009846    | Cd24a   | 38 |
| NM_009909    | Cxcr2   | 38 |
| NM_010020    | Slc6a3  | 38 |
| NM_010053    | Dlx1    | 38 |
| NM_010080    | Dspp    | 38 |
| NM_010271    | Gpd1    | 38 |
| NM_010276    | Gem     | 38 |
| NM_010464    | Hoxc13  | 38 |
| NM_010755    | Maff    | 38 |
| NM_010878    | Nck1    | 38 |
| NM_010916    | Nhlh1   | 38 |
| NM_011012    | Opr11   | 38 |
| NM_011286    | Rph3a   | 38 |
| NM_011416    | Smarca2 | 38 |
| NM_011428    | Snap25  | 38 |
| NM_011537    | Tbx5    | 38 |
| NM_013415    | Atp1b2  | 38 |
| NM_013495    | Cpt1a   | 38 |
| NM_013669    | Snap91  | 38 |
| NM_013767    | Csnkle  | 38 |
| NM_013791    | Mkln1   | 38 |
| NM_015764    | Greb1   | 38 |

|           |               |    |
|-----------|---------------|----|
| NM_016696 | Gpc1          | 38 |
| NM_016756 | Cdk2          | 38 |
| NM_016792 | Txn11         | 38 |
| NM_016808 | Usp2          | 38 |
| NM_018766 | Ntsr1         | 38 |
| NM_018815 | Nup210        | 38 |
| NM_019445 | Fmn2          | 38 |
| NM_019540 | Pfp1          | 38 |
| NM_019541 | Cts8          | 38 |
| NM_019660 | Mycbp         | 38 |
| NM_019734 | Asah1         | 38 |
| NM_019919 | Ltbpl         | 38 |
| NM_021476 | Cysltrl       | 38 |
| NM_021542 | Kcnk5         | 38 |
| NM_022378 | Foxb1         | 38 |
| NM_022657 | Fgf23         | 38 |
| NM_023232 | Diablo        | 38 |
| NM_024188 | Oxctl         | 38 |
| NM_024255 | Hsd12         | 38 |
| NM_025712 | Snx31         | 38 |
| NM_025858 | Shisa5        | 38 |
| NM_025926 | Dnajb4        | 38 |
| NM_025994 | Efhd2         | 38 |
| NM_026029 | Glod4         | 38 |
| NM_026075 | Sreklip1      | 38 |
| NM_026268 | Dusp6         | 38 |
| NM_026538 | Ddx56         | 38 |
| NM_026907 | Sectmlb       | 38 |
| NM_027298 | Ccdc89        | 38 |
| NM_027554 | Usp38         | 38 |
| NM_027828 | Fam110c       | 38 |
| NM_027930 | Fam54a        | 38 |
| NM_027977 | 2310001A20Rik | 38 |
| NM_028016 | Nanog         | 38 |
| NM_028189 | B3gnt3        | 38 |
| NM_029330 | Fpgt          | 38 |
| NM_029561 | Ndfip2        | 38 |
| NM_029573 | Idh3a         | 38 |
| NM_030229 | Polr3h        | 38 |
| NM_030710 | Slamf6        | 38 |
| NM_031842 | Smardc1       | 38 |
| NM_031999 | Gpr137b       | 38 |
| NM_032002 | Nrg4          | 38 |
| NM_032397 | Kcnn1         | 38 |
| NM_033270 | E2f6          | 38 |
| NM_033561 | Eif4h         | 38 |
| NM_033618 | Supt16h       | 38 |
| NM_053269 | Rad51c        | 38 |
| NM_080561 | Rnf216        | 38 |
| NM_126166 | Tlr3          | 38 |
| NM_130456 | Nphs2         | 38 |
| NM_130878 | Cdhr1         | 38 |
| NM_130905 | Cd209e        | 38 |
| NM_133714 | 2310037I24Rik | 38 |

|              |               |    |
|--------------|---------------|----|
| NM_133991    | Ftsj1         | 38 |
| NM_133995    | Upb1          | 38 |
| NM_133998    | 1810008A18Rik | 38 |
| NM_134025    | Pex12         | 38 |
| NM_138753    | Hexim1        | 38 |
| NM_145487    | Prr3          | 38 |
| NM_145857    | Nod2          | 38 |
| NM_146094    | Fads1         | 38 |
| NM_152818    | Osbp2         | 38 |
| NM_153088    | Ctdsp1        | 38 |
| NM_153423    | Wasf2         | 38 |
| NM_172306    | Cyp4a12b      | 38 |
| NM_172393    | Aim1          | 38 |
| NM_172553    | Alx1          | 38 |
| NM_173019    | Pfkfb4        | 38 |
| NM_175107    | 2310022A10Rik | 38 |
| NM_175135    | Eif2b3        | 38 |
| NM_175236    | Adhfe1        | 38 |
| NM_175326    | D330045A20Rik | 38 |
| NM_175432    | Tmem132c      | 38 |
| NM_175499    | Slitrk6       | 38 |
| NM_175531    | Mrgprb2       | 38 |
| NM_175533    | 5830411N06Rik | 38 |
| NM_175557    | Zfp384        | 38 |
| NM_175730    | Hoxc5         | 38 |
| NM_177039    | A530016L24Rik | 38 |
| NM_177235    | Bend6         | 38 |
| NM_177568    | Plcb2         | 38 |
| NM_177692    | Bloc1s3       | 38 |
| NM_177713    | Gapt          | 38 |
| NM_177725    | Lrrc8a        | 38 |
| NM_177894    | Fam154b       | 38 |
| NM_178279    | Pxk           | 38 |
| NM_178395    | Zdhhc2        | 38 |
| NM_183391    | Tnfsf18       | 38 |
| NM_197986    | Tmem140       | 38 |
| NM_198609    | Rsl24d1       | 38 |
| NM_198647    | Tbc1d22b      | 38 |
| NR_015512    | 4933406K04Rik | 38 |
| NR_015513    | E130114P18Rik | 38 |
| NR_027973    | 5730522E02Rik | 38 |
| NR_028315    | Yaf2          | 38 |
| NR_030688    | Gm6402        | 38 |
| NM_001013780 | Slc25a34      | 37 |
| NM_001024712 | Gm3696        | 37 |
| NM_001031808 | Mrpl41        | 37 |
| NM_001033259 | Ccdc109a      | 37 |
| NM_001033393 | Tmem104       | 37 |
| NM_001033451 | Zfp408        | 37 |
| NM_001033530 | AW146154      | 37 |
| NM_001034899 | Gm16432       | 37 |
| NM_001038613 | Olfm1         | 37 |
| NM_001039532 | Zfp784        | 37 |
| NM_001042708 | Ilf3          | 37 |

|              |               |    |
|--------------|---------------|----|
| NM_001045486 | Zfp180        | 37 |
| NM_001081150 | Lonrf1        | 37 |
| NM_001081167 | B3gnt6        | 37 |
| NM_001110496 | Tmem87a       | 37 |
| NM_001122756 | Corin         | 37 |
| NM_001130408 | Arf1          | 37 |
| NM_001130450 | Nfe2l1        | 37 |
| NM_001145802 | Mak           | 37 |
| NM_001146199 | Ptpn21        | 37 |
| NM_001159603 | Pum1          | 37 |
| NM_001159696 | Tcfap2c       | 37 |
| NM_001160214 | Smek1         | 37 |
| NM_001163310 | Rit1          | 37 |
| NM_001163445 | 2700089E24Rik | 37 |
| NM_001164059 | Sell          | 37 |
| NM_001164325 | Trpm7         | 37 |
| NM_001170710 | Asb8          | 37 |
| NM_001190885 | Kcnip1        | 37 |
| NM_001195006 | Ndrp4         | 37 |
| NM_001195529 | Gm4980        | 37 |
| NM_001198914 | Myb           | 37 |
| NM_001199020 | Angel2        | 37 |
| NM_001199494 | Ei24          | 37 |
| NM_001200023 | Zfp963        | 37 |
| NM_001205181 | Abhd4         | 37 |
| NM_007477    | Arf2          | 37 |
| NM_007679    | Cebpd         | 37 |
| NM_007756    | Cplx1         | 37 |
| NM_007795    | Ctf1          | 37 |
| NM_007822    | Cyp4a14       | 37 |
| NM_008008    | Fgf7          | 37 |
| NM_008090    | Gata2         | 37 |
| NM_008137    | Gna14         | 37 |
| NM_008478    | Llcam         | 37 |
| NM_008609    | Mmp15         | 37 |
| NM_008750    | Nxn           | 37 |
| NM_008817    | Peg3          | 37 |
| NM_008978    | Ptpn20        | 37 |
| NM_009079    | Rpl22         | 37 |
| NM_009554    | Zfp37         | 37 |
| NM_009565    | Zbtb7b        | 37 |
| NM_009567    | Zfp93         | 37 |
| NM_009574    | Zic2          | 37 |
| NM_009774    | Bub3          | 37 |
| NM_009875    | Cdkn1b        | 37 |
| NM_009930    | Col3a1        | 37 |
| NM_010124    | Eif4ebp2      | 37 |
| NM_010170    | F2r12         | 37 |
| NM_010449    | Hoxa1         | 37 |
| NM_010554    | I11a          | 37 |
| NM_010569    | Invs          | 37 |
| NM_010770    | Matn3         | 37 |
| NM_010790    | Melk          | 37 |
| NM_010804    | M11t10        | 37 |

|           |               |    |
|-----------|---------------|----|
| NM_010930 | Nov           | 37 |
| NM_011048 | Pcsk6         | 37 |
| NM_011153 | Gsbs          | 37 |
| NM_011250 | Rb12          | 37 |
| NM_011327 | Scp2          | 37 |
| NM_011342 | Sec22b        | 37 |
| NM_011358 | Srsf2         | 37 |
| NM_011380 | Six2          | 37 |
| NM_011465 | Spnal         | 37 |
| NM_011794 | Bpnt1         | 37 |
| NM_011804 | Creg1         | 37 |
| NM_011818 | Gmcl1         | 37 |
| NM_011981 | Zfp260        | 37 |
| NM_013463 | Gla           | 37 |
| NM_013601 | Msx2          | 37 |
| NM_016768 | Pbx3          | 37 |
| NM_016771 | Sult1d1       | 37 |
| NM_016894 | Ramp1         | 37 |
| NM_016980 | Rpl5          | 37 |
| NM_017392 | Celsr2        | 37 |
| NM_018759 | Zfp326        | 37 |
| NM_019535 | Sh3gl2        | 37 |
| NM_019649 | Clptm1        | 37 |
| NM_019682 | Dynl11        | 37 |
| NM_019814 | Higd1a        | 37 |
| NM_021331 | G6pc2         | 37 |
| NM_021609 | Ccbp2         | 37 |
| NM_023126 | Rab8a         | 37 |
| NM_023144 | Nono          | 37 |
| NM_023647 | Nipa2         | 37 |
| NM_024191 | Arl2bp        | 37 |
| NM_024222 | Stt3b         | 37 |
| NM_024449 | Sost          | 37 |
| NM_025359 | Tspan13       | 37 |
| NM_025432 | Trappc2       | 37 |
| NM_025586 | Rpl15         | 37 |
| NM_025588 | Exoc2         | 37 |
| NM_025716 | Spryd4        | 37 |
| NM_025793 | Wdr45l        | 37 |
| NM_025885 | Med19         | 37 |
| NM_025944 | 2810432L12Rik | 37 |
| NM_025948 | Lsm14a        | 37 |
| NM_025961 | Gatm          | 37 |
| NM_026185 | Abhd15        | 37 |
| NM_026210 | Fam18b        | 37 |
| NM_026369 | Arpc5         | 37 |
| NM_026592 | B230118H07Rik | 37 |
| NM_026598 | Ebp1          | 37 |
| NM_026615 | Urm1          | 37 |
| NM_026856 | Zfp644        | 37 |
| NM_026950 | Ociad2        | 37 |
| NM_027526 | Rasgef1a      | 37 |
| NM_027895 | Ulk3          | 37 |
| NM_027901 | Gtf3c2        | 37 |

|           |               |    |
|-----------|---------------|----|
| NM_028370 | Pot1b         | 37 |
| NM_028402 | Zfp493        | 37 |
| NM_028920 | Hyal6         | 37 |
| NM_029279 | Secisbp2      | 37 |
| NM_029413 | Morc4         | 37 |
| NM_029988 | Pigh          | 37 |
| NM_030208 | 2310079F23Rik | 37 |
| NM_030561 | BC004004      | 37 |
| NM_033324 | Dgcr8         | 37 |
| NM_130449 | Colec12       | 37 |
| NM_130458 | Sp7           | 37 |
| NM_133360 | Acaca         | 37 |
| NM_133744 | Ccdc71        | 37 |
| NM_133832 | Rdh10         | 37 |
| NM_134110 | Kcne2         | 37 |
| NM_138750 | Prom2         | 37 |
| NM_144558 | Bivm          | 37 |
| NM_144940 | Uroc1         | 37 |
| NM_145130 | Lpcat3        | 37 |
| NM_145383 | Rho           | 37 |
| NM_145476 | Tbc1d22a      | 37 |
| NM_145483 | Zfp160        | 37 |
| NM_145532 | Mall          | 37 |
| NM_145612 | Zfp810        | 37 |
| NM_145938 | Rpp40         | 37 |
| NM_146174 | Fam115c       | 37 |
| NM_147093 | O1fr558       | 37 |
| NM_147776 | Vwa1          | 37 |
| NM_148944 | Chrn4         | 37 |
| NM_153086 | Gjd4          | 37 |
| NM_153598 | Ugt2b34       | 37 |
| NM_172261 | Ppp1r9b       | 37 |
| NM_172449 | Bzrap1        | 37 |
| NM_172535 | Iqub          | 37 |
| NM_172647 | F11r          | 37 |
| NM_173189 | Mcp1          | 37 |
| NM_175098 | Ccdc126       | 37 |
| NM_175113 | Trmt6         | 37 |
| NM_175270 | Ankrd56       | 37 |
| NM_175279 | Rassf10       | 37 |
| NM_175520 | Gpr81         | 37 |
| NM_176847 | Ush1g         | 37 |
| NM_177099 | Lefty2        | 37 |
| NM_177233 | Fam19a4       | 37 |
| NM_177611 | Psd4          | 37 |
| NM_177887 | Tmem150b      | 37 |
| NM_178601 | Imp4          | 37 |
| NM_178622 | Suds3         | 37 |
| NM_178874 | Tmcc2         | 37 |
| NM_181854 | Zfp828        | 37 |
| NM_183029 | Igf2bp2       | 37 |
| NM_197997 | 4930422G04Rik | 37 |
| NM_198862 | Nlgn2         | 37 |
| NM_199307 | Ece1          | 37 |

|              |                |    |
|--------------|----------------|----|
| NR_002452    | Nctc1          | 37 |
| NR_002846    | Nespas         | 37 |
| NR_002873    | Vax2osl        | 37 |
| NR_015515    | 6430562015Rik  | 37 |
| NR_015565    | A530053G22Rik  | 37 |
| NR_015596    | 4930442L01Rik  | 37 |
| NR_015598    | 2810047C21Rik1 | 37 |
| NR_028449    | Hdac10         | 37 |
| NR_033213    | 1700111N16Rik  | 37 |
| NR_033219    | BC020402       | 37 |
| NR_033303    | 9330176C04Rik  | 37 |
| NR_037603    | Kat5           | 37 |
| NR_038027    | B230208H11Rik  | 37 |
| NR_038097    | Gm11696        | 37 |
| NM_001001738 | Ittrip         | 36 |
| NM_001003908 | Cltc           | 36 |
| NM_001010825 | Ficd           | 36 |
| NM_001013370 | Sesn1          | 36 |
| NM_001013373 | Tmprss13       | 36 |
| NM_001013758 | Lingo3         | 36 |
| NM_001017426 | Kdm6b          | 36 |
| NM_001017955 | Zscan18        | 36 |
| NM_001025250 | Vegfa          | 36 |
| NM_001033197 | AU015228       | 36 |
| NM_001033217 | Prickle1       | 36 |
| NM_001033274 | Brd1           | 36 |
| NM_001033290 | Gpr55          | 36 |
| NM_001033606 | Acs13          | 36 |
| NM_001034905 | Spag11b        | 36 |
| NM_001037877 | Tcf25          | 36 |
| NM_001039351 | Nolc1          | 36 |
| NM_001039485 | Fam38b         | 36 |
| NM_001079908 | Fgfr1          | 36 |
| NM_001081124 | Mtap7d2        | 36 |
| NM_001081133 | Kif16b         | 36 |
| NM_001081288 | Taf2           | 36 |
| NM_001081419 | Dip2a          | 36 |
| NM_001081549 | Rcan1          | 36 |
| NM_001085515 | AI464131       | 36 |
| NM_001085521 | Tmem90b        | 36 |
| NM_001101475 | F830016B08Rik  | 36 |
| NM_001101488 | Gsg11          | 36 |
| NM_001102455 | Aplp2          | 36 |
| NM_001110160 | Lrrc61         | 36 |
| NM_001111075 | Cdc25b         | 36 |
| NM_001113179 | Bub1           | 36 |
| NM_001127338 | Aldh7a1        | 36 |
| NM_001145164 | Tgtp2          | 36 |
| NM_001145552 | 2310045N01Rik  | 36 |
| NM_001159866 | Uchl5          | 36 |
| NM_001163695 | 4932438H23Rik  | 36 |
| NM_001163730 | Gm9125         | 36 |
| NM_001163767 | Tctex1d1       | 36 |
| NM_001164190 | Mtm1           | 36 |

|              |           |    |
|--------------|-----------|----|
| NM_001164225 | Fbxl16    | 36 |
| NM_001164426 | Kcnk13    | 36 |
| NM_001166453 | Pls3      | 36 |
| NM_001177406 | Gm14431   | 36 |
| NM_001177407 | Gm8898    | 36 |
| NM_001177625 | Ect2      | 36 |
| NM_001205243 | Fas1      | 36 |
| NM_007470    | Apod      | 36 |
| NM_007472    | Aqp1      | 36 |
| NM_007497    | Atf1      | 36 |
| NM_007611    | Casp7     | 36 |
| NM_007740    | Col9a1    | 36 |
| NM_007768    | Crp       | 36 |
| NM_007993    | Fbn1      | 36 |
| NM_008092    | Gata4     | 36 |
| NM_008537    | Amacr     | 36 |
| NM_008599    | Cxcl9     | 36 |
| NM_008608    | Mmp14     | 36 |
| NM_008652    | Mybl2     | 36 |
| NM_008854    | Prkaca    | 36 |
| NM_008871    | Serpine1  | 36 |
| NM_009025    | Rasa3     | 36 |
| NM_009242    | Sparc     | 36 |
| NM_009361    | Tfdp1     | 36 |
| NM_009679    | Ap2m1     | 36 |
| NM_010140    | Epha3     | 36 |
| NM_010196    | Fga       | 36 |
| NM_010333    | Slpr2     | 36 |
| NM_010799    | Minpp1    | 36 |
| NM_010836    | Msx3      | 36 |
| NM_011459    | Serpinb8  | 36 |
| NM_011579    | Tgtp1     | 36 |
| NM_011822    | Pigq      | 36 |
| NM_011976    | Sema4g    | 36 |
| NM_012025    | Racgap1   | 36 |
| NM_012026    | Rgnef     | 36 |
| NM_012045    | Pla2g2f   | 36 |
| NM_013757    | Syt14     | 36 |
| NM_013876    | Rnf11     | 36 |
| NM_013877    | Cabp5     | 36 |
| NM_013906    | Adamts8   | 36 |
| NM_016751    | Clec4f    | 36 |
| NM_019771    | Dstn      | 36 |
| NM_021560    | Bhlhe22   | 36 |
| NM_023270    | Rnf128    | 36 |
| NM_024237    | Fbln7     | 36 |
| NM_024454    | Rab21     | 36 |
| NM_025382    | Tmem57    | 36 |
| NM_025394    | Tomm7     | 36 |
| NM_025566    | Tnfaip811 | 36 |
| NM_025661    | Ormdl3    | 36 |
| NM_025844    | Chordc1   | 36 |
| NM_025934    | Riok2     | 36 |
| NM_025998    | Nkain1    | 36 |



|           |               |    |
|-----------|---------------|----|
| NM_026006 | Sft2d3        | 36 |
| NM_026030 | Eif2s2        | 36 |
| NM_026062 | Fam69a        | 36 |
| NM_026368 | 5830433M19Rik | 36 |
| NM_026921 | Iscal         | 36 |
| NM_026965 | Comtd1        | 36 |
| NM_027315 | Ube2q1        | 36 |
| NM_027450 | Glipr2        | 36 |
| NM_028351 | Rspo3         | 36 |
| NM_028399 | Ccnt2         | 36 |
| NM_028561 | Speer4b       | 36 |
| NM_028680 | Ift57         | 36 |
| NM_028713 | Rftn2         | 36 |
| NM_031408 | Gigyf1        | 36 |
| NM_053087 | Epgn          | 36 |
| NM_054054 | Brdt          | 36 |
| NM_054055 | Slc13a3       | 36 |
| NM_080455 | Tshz2         | 36 |
| NM_133231 | Rfxap         | 36 |
| NM_133748 | Insig2        | 36 |
| NM_133758 | Usp47         | 36 |
| NM_134021 | Pnpo          | 36 |
| NM_134188 | Acot2         | 36 |
| NM_138953 | E112          | 36 |
| NM_144784 | Acat1         | 36 |
| NM_144797 | Metrn1        | 36 |
| NM_144830 | Tmem106a      | 36 |
| NM_145373 | Sectm1a       | 36 |
| NM_145517 | Ormdl1        | 36 |
| NM_145606 | Chmpla        | 36 |
| NM_146035 | Mgat2         | 36 |
| NM_146193 | Btbd1         | 36 |
| NM_153169 | Pnma3         | 36 |
| NM_153394 | Gpr156        | 36 |
| NM_172597 | Txndc16       | 36 |
| NM_173014 | Lpcat2        | 36 |
| NM_173451 | Arsj          | 36 |
| NM_173778 | Sh2d7         | 36 |
| NM_175092 | Rhof          | 36 |
| NM_175260 | Myh10         | 36 |
| NM_175328 | Slc6a15       | 36 |
| NM_175374 | Mtrf11        | 36 |
| NM_175490 | Gpr75         | 36 |
| NM_175512 | Dhrs9         | 36 |
| NM_177081 | Ptpn7         | 36 |
| NM_177406 | Cyp4a12a      | 36 |
| NM_177640 | D030056L22Rik | 36 |
| NM_177718 | 1600021P15Rik | 36 |
| NM_178384 | Zfp74         | 36 |
| NM_178589 | Tnfrsf21      | 36 |
| NM_178651 | Slc30a9       | 36 |
| NM_178690 | Rab3gap1      | 36 |
| NM_178748 | Egflam        | 36 |
| NM_178907 | Mapkapk3      | 36 |

|              |               |    |
|--------------|---------------|----|
| NM_199018    | Stard8        | 36 |
| NM_199310    | Ccdc32        | 36 |
| NM_201640    | Cyp4a31       | 36 |
| NM_207525    | Opa3          | 36 |
| NR_002859    | Olfr75-ps1    | 36 |
| NR_002867    | Pax6os1       | 36 |
| NR_003552    | Cyp2d13       | 36 |
| NR_028264    | Dleu2         | 36 |
| NR_038060    | 5830428M24Rik | 36 |
| NM_001013755 | 5730409E04Rik | 35 |
| NM_001013806 | Ankrd13c      | 35 |
| NM_001024148 | Ugt2a2        | 35 |
| NM_001024619 | Tsku          | 35 |
| NM_001029983 | Man1b1        | 35 |
| NM_001033175 | Cln6          | 35 |
| NM_001033500 | Wdr72         | 35 |
| NM_001037719 | Btla          | 35 |
| NM_001037940 | Dnajb6        | 35 |
| NM_001039138 | Camk2g        | 35 |
| NM_001039149 | Cd226         | 35 |
| NM_001039160 | Gvin1         | 35 |
| NM_001040689 | Rspo4         | 35 |
| NM_001042487 | Dlgap4        | 35 |
| NM_001042727 | Rarg          | 35 |
| NM_001079901 | Repin1        | 35 |
| NM_001080118 | Med1          | 35 |
| NM_001080819 | Arid1a        | 35 |
| NM_001080929 | Cdr21         | 35 |
| NM_001081055 | Trappc10      | 35 |
| NM_001081253 | Fbxo43        | 35 |
| NM_001081308 | Taok3         | 35 |
| NM_001081332 | Slc9a5        | 35 |
| NM_001082552 | Trim21        | 35 |
| NM_001098233 | Purg          | 35 |
| NM_001110508 | Zfp703        | 35 |
| NM_001111106 | Uba3          | 35 |
| NM_001113213 | Odf2          | 35 |
| NM_001114541 | Fam113a       | 35 |
| NM_001122768 | Lrrc8d        | 35 |
| NM_001135093 | Klf14         | 35 |
| NM_001145162 | Ube2ql1       | 35 |
| NM_001145351 | 6430550D23Rik | 35 |
| NM_001145403 | Kent1         | 35 |
| NM_001145813 | Elf5          | 35 |
| NM_001159288 | Morc2a        | 35 |
| NM_001160211 | Cnih3         | 35 |
| NM_001160410 | Scrt2         | 35 |
| NM_001160711 | Cd300lg       | 35 |
| NM_001161338 | Sh3bp5l       | 35 |
| NM_001163098 | Tchh          | 35 |
| NM_001163155 | Col4a5        | 35 |
| NM_001163215 | Fgfr3         | 35 |
| NM_001163307 | Pcgf2         | 35 |
| NM_001163359 | Figl1         | 35 |

|              |               |    |
|--------------|---------------|----|
| NM_001163527 | Itpripl1      | 35 |
| NM_001163531 | Tmem175       | 35 |
| NM_001163721 | 1190007F08Rik | 35 |
| NM_001164491 | Ablim3        | 35 |
| NM_001164643 | Trappc9       | 35 |
| NM_001166024 | Arfgap2       | 35 |
| NM_001166503 | Slc39a11      | 35 |
| NM_001168497 | Plscr3        | 35 |
| NM_001173547 | Taz           | 35 |
| NM_001177371 | Dbn1          | 35 |
| NM_001177565 | Gm8300        | 35 |
| NM_001190187 | Nrg3          | 35 |
| NM_001204134 | Clqtnf3       | 35 |
| NM_007664    | Cdh2          | 35 |
| NM_007858    | Diap1         | 35 |
| NM_008112    | Gdi2          | 35 |
| NM_008149    | Gpam          | 35 |
| NM_008177    | Grpr          | 35 |
| NM_008197    | H1f0          | 35 |
| NM_008256    | Hmgcs2        | 35 |
| NM_008309    | Htr1d         | 35 |
| NM_008381    | Inhbb         | 35 |
| NM_008584    | Meox2         | 35 |
| NM_008600    | Mip           | 35 |
| NM_008650    | Mut           | 35 |
| NM_008681    | Ndrgl         | 35 |
| NM_008741    | Nsg2          | 35 |
| NM_009282    | Stagl         | 35 |
| NM_009378    | Thbd          | 35 |
| NM_009469    | Ulk1          | 35 |
| NM_009522    | Wnt3a         | 35 |
| NM_009657    | Aldoc         | 35 |
| NM_009814    | Casq2         | 35 |
| NM_010461    | Hoxb8         | 35 |
| NM_010612    | Kdr           | 35 |
| NM_010722    | Lmb2          | 35 |
| NM_010750    | Mab2111       | 35 |
| NM_010934    | Npy1r         | 35 |
| NM_010941    | Nsdhl         | 35 |
| NM_011059    | Padil         | 35 |
| NM_011410    | Slfn4         | 35 |
| NM_011613    | Tnfsf11       | 35 |
| NM_011766    | Zfpm2         | 35 |
| NM_011779    | Coro1c        | 35 |
| NM_011836    | Lamc3         | 35 |
| NM_011908    | Ub13          | 35 |
| NM_011947    | Map3k3        | 35 |
| NM_013659    | Sema4b        | 35 |
| NM_013788    | Peg12         | 35 |
| NM_013898    | Timm8a1       | 35 |
| NM_016678    | Reck          | 35 |
| NM_016783    | Pgrmc1        | 35 |
| NM_016911    | Srpx          | 35 |
| NM_016967    | Olig2         | 35 |

|           |               |    |
|-----------|---------------|----|
| NM_017367 | Ccni          | 35 |
| NM_017378 | Pcdh12        | 35 |
| NM_018808 | Dnajb1        | 35 |
| NM_019703 | Pfkp          | 35 |
| NM_021050 | Cftr          | 35 |
| NM_021292 | Evc           | 35 |
| NM_021301 | Slc15a2       | 35 |
| NM_021883 | Tmod1         | 35 |
| NM_023668 | Ndel1         | 35 |
| NM_024273 | 4930455C21Rik | 35 |
| NM_024467 | Zfp319        | 35 |
| NM_025541 | Asf1a         | 35 |
| NM_025591 | Fam136a       | 35 |
| NM_025593 | Polr21        | 35 |
| NM_025647 | Cmpk1         | 35 |
| NM_025709 | Gapvd1        | 35 |
| NM_025813 | Mfsd1         | 35 |
| NM_026157 | Mtpap         | 35 |
| NM_026170 | Ergic1        | 35 |
| NM_026217 | Atg12         | 35 |
| NM_026274 | Rspry1        | 35 |
| NM_026395 | Rer1          | 35 |
| NM_026928 | 1810014F10Rik | 35 |
| NM_027174 | Col22a1       | 35 |
| NM_027332 | Rpf1          | 35 |
| NM_027482 | 5730508B09Rik | 35 |
| NM_027903 | Dhdh          | 35 |
| NM_028296 | Car10         | 35 |
| NM_028335 | Zfp248        | 35 |
| NM_028472 | Bmper         | 35 |
| NM_028543 | Zfp763        | 35 |
| NM_028910 | Olfir701      | 35 |
| NM_029031 | Shpk          | 35 |
| NM_029035 | Spsb1         | 35 |
| NM_029100 | Sepn1         | 35 |
| NM_029614 | Prss23        | 35 |
| NM_029657 | Mgrn1         | 35 |
| NM_029665 | Ipo11         | 35 |
| NM_029953 | Arhgef38      | 35 |
| NM_030188 | Ttc30a1       | 35 |
| NM_030198 | Gins3         | 35 |
| NM_053129 | Pcdhb4        | 35 |
| NM_053130 | Pcdhb5        | 35 |
| NM_053132 | Pcdhb7        | 35 |
| NM_053184 | Ugt2a1        | 35 |
| NM_133358 | Zfp617        | 35 |
| NM_133485 | Ppp1r14c      | 35 |
| NM_133921 | Nfxl1         | 35 |
| NM_134109 | Ildr1         | 35 |
| NM_139154 | Rab40c        | 35 |
| NM_139298 | Wnt9a         | 35 |
| NM_144802 | Hnrp11        | 35 |
| NM_145420 | Ube2d1        | 35 |
| NM_145463 | Shisa2        | 35 |

|              |               |    |
|--------------|---------------|----|
| NM_145492    | Zfp521        | 35 |
| NM_145585    | Thumpd1       | 35 |
| NM_145587    | Sbk1          | 35 |
| NM_145944    | Ccdc25        | 35 |
| NM_146211    | Glt25d1       | 35 |
| NM_152801    | Arhgef6       | 35 |
| NM_153054    | Slc18a1       | 35 |
| NM_153789    | Mylip         | 35 |
| NM_172405    | Fam175a       | 35 |
| NM_172496    | Cob1          | 35 |
| NM_172503    | Zswim4        | 35 |
| NM_172644    | Dars2         | 35 |
| NM_173783    | Mageb18       | 35 |
| NM_175180    | Wdr44         | 35 |
| NM_175217    | Mmd2          | 35 |
| NM_175366    | Mex3b         | 35 |
| NM_175669    | Gpr82         | 35 |
| NM_175749    | Nup153        | 35 |
| NM_175938    | Btn2a2        | 35 |
| NM_177324    | Sbf2          | 35 |
| NM_177915    | Igsf1         | 35 |
| NM_178278    | Caps2         | 35 |
| NM_178379    | Cox10         | 35 |
| NM_178615    | Rgmb          | 35 |
| NM_178726    | Ppm1l         | 35 |
| NM_178740    | Slitrk4       | 35 |
| NM_178744    | Zbtb1         | 35 |
| NM_183017    | Tt1112        | 35 |
| NM_207223    | Acap3         | 35 |
| NM_207279    | Plcxdl        | 35 |
| NM_207655    | Egfr          | 35 |
| NM_207669    | Gabpb1        | 35 |
| NR_027448    | AA543186      | 35 |
| NR_028384    | 4930528A17Rik | 35 |
| NR_029436    | 1700028J19Rik | 35 |
| NR_033512    | Gm6194        | 35 |
| NR_037975    | Gm5105        | 35 |
| NR_038062    | Yipf2         | 35 |
| NM_001008506 | Zc3h14        | 34 |
| NM_001009819 | A3galt2       | 34 |
| NM_001012363 | Slc2a9        | 34 |
| NM_001024720 | Hmcn1         | 34 |
| NM_001024918 | Rfx4          | 34 |
| NM_001024928 | Zfp667        | 34 |
| NM_001025296 | Dffa          | 34 |
| NM_001029838 | Pknox2        | 34 |
| NM_001033237 | Yeats2        | 34 |
| NM_001033488 | Mfsd2b        | 34 |
| NM_001033537 | Pgap3         | 34 |
| NM_001037170 | Tomm40l       | 34 |
| NM_001037800 | Cd209b        | 34 |
| NM_001039553 | 4930467E23Rik | 34 |
| NM_001076676 | Usp33         | 34 |
| NM_001077363 | Ptbpl         | 34 |

|              |               |    |
|--------------|---------------|----|
| NM_001079822 | Tcf711        | 34 |
| NM_001081088 | Lrp2          | 34 |
| NM_001081158 | 1300001I01Rik | 34 |
| NM_001081265 | Heatr2        | 34 |
| NM_001083906 | Nr3c2         | 34 |
| NM_001097979 | Hist1h2bq     | 34 |
| NM_001098476 | Grsf1         | 34 |
| NM_001099636 | Pnmal2        | 34 |
| NM_001110204 | Acvr1         | 34 |
| NM_001110555 | Hist1h2br     | 34 |
| NM_001113569 | Stxbp1        | 34 |
| NM_001122892 | Fyn           | 34 |
| NM_001128307 | Dock9         | 34 |
| NM_001131068 | Rfesd         | 34 |
| NM_001135198 | Ccdc36        | 34 |
| NM_001142642 | Fbrs11        | 34 |
| NM_001142809 | Slc6a8        | 34 |
| NM_001143683 | Mpped2        | 34 |
| NM_001145979 | Gtpbp2        | 34 |
| NM_001159369 | Polq          | 34 |
| NM_001159384 | Mlx           | 34 |
| NM_001159507 | Grip2         | 34 |
| NM_001163336 | Atp2a3        | 34 |
| NM_001163475 | Zfp746        | 34 |
| NM_001163512 | Rgs12         | 34 |
| NM_001163565 | Ptpn5         | 34 |
| NM_001163687 | Naaa          | 34 |
| NM_001164096 | Polr3e        | 34 |
| NM_001164581 | Zfp961        | 34 |
| NM_001164659 | Trank1        | 34 |
| NM_001166474 | Vmac          | 34 |
| NM_001167920 | Slc8a3        | 34 |
| NM_001168538 | Cdadcl        | 34 |
| NM_001170488 | Tprkb         | 34 |
| NM_001171034 | Tmbim6        | 34 |
| NM_001174047 | Cacna2d2      | 34 |
| NM_001174154 | Pcdha4-g      | 34 |
| NM_001177776 | Ahi1          | 34 |
| NM_001177973 | Irak1         | 34 |
| NM_001177980 | Pde4b         | 34 |
| NM_001195025 | Nuak2         | 34 |
| NM_001195496 | Dclk2         | 34 |
| NM_001198790 | Ak1           | 34 |
| NM_001199059 | Rabgef1       | 34 |
| NM_001205391 | Atg16l1       | 34 |
| NM_007422    | Adss          | 34 |
| NM_007590    | Calm3         | 34 |
| NM_007667    | Cdh8          | 34 |
| NM_007985    | Fance         | 34 |
| NM_008024    | Foxl1         | 34 |
| NM_008086    | Gas1          | 34 |
| NM_008087    | Gas2          | 34 |
| NM_008236    | Hes2          | 34 |
| NM_008391    | Irf2          | 34 |

|           |         |    |
|-----------|---------|----|
| NM_008540 | Smad4   | 34 |
| NM_008663 | Myo7a   | 34 |
| NM_008740 | Nsf     | 34 |
| NM_008942 | Npepps  | 34 |
| NM_009020 | Rag2    | 34 |
| NM_009185 | Stil    | 34 |
| NM_009408 | Top1    | 34 |
| NM_009484 | Uty     | 34 |
| NM_009519 | Wnt11   | 34 |
| NM_009536 | Ywhae   | 34 |
| NM_009931 | Col4a1  | 34 |
| NM_009962 | Gpr44   | 34 |
| NM_010054 | Dlx2    | 34 |
| NM_010200 | Fgf13   | 34 |
| NM_010330 | Emb     | 34 |
| NM_010467 | Hoxd1   | 34 |
| NM_010610 | Kcnma1  | 34 |
| NM_010820 | Mpdz    | 34 |
| NM_011135 | Cnot7   | 34 |
| NM_011263 | Rest    | 34 |
| NM_011269 | Rhag    | 34 |
| NM_011308 | Ncor1   | 34 |
| NM_011345 | Sele    | 34 |
| NM_011992 | Rcn2    | 34 |
| NM_013571 | Ksr1    | 34 |
| NM_015775 | Tmprss2 | 34 |
| NM_016847 | Avpr1a  | 34 |
| NM_016860 | Actrla  | 34 |
| NM_017401 | Polm    | 34 |
| NM_017475 | Rragc   | 34 |
| NM_017477 | Copg    | 34 |
| NM_018743 | Agpat6  | 34 |
| NM_019661 | Ykt6    | 34 |
| NM_019803 | Ube2g2  | 34 |
| NM_020048 | Med20   | 34 |
| NM_021028 | Tk2     | 34 |
| NM_021565 | Midn    | 34 |
| NM_023258 | Pycard  | 34 |
| NM_023731 | Ccdc86  | 34 |
| NM_023739 | Nfx1    | 34 |
| NM_025286 | Slc31a2 | 34 |
| NM_025352 | Uqcrq   | 34 |
| NM_025377 | Fam33a  | 34 |
| NM_025707 | Klh128  | 34 |
| NM_025721 | Spesp1  | 34 |
| NM_025830 | Wwp2    | 34 |
| NM_025996 | Tomm34  | 34 |
| NM_026033 | Gatad1  | 34 |
| NM_026103 | Vsig1   | 34 |
| NM_026236 | Wdr48   | 34 |
| NM_026240 | Gramd3  | 34 |
| NM_026260 | Tctn3   | 34 |
| NM_026281 | Tm7sf3  | 34 |
| NM_026445 | Sumf2   | 34 |

|           |               |    |
|-----------|---------------|----|
| NM_026554 | Ncbp2         | 34 |
| NM_026825 | Lrrc16a       | 34 |
| NM_027230 | Zmynd8        | 34 |
| NM_027258 | Rnf157        | 34 |
| NM_027865 | Tmem25        | 34 |
| NM_027984 | Epn3          | 34 |
| NM_028007 | Itfg1         | 34 |
| NM_028186 | Nkd2          | 34 |
| NM_028227 | Brap          | 34 |
| NM_028243 | Prcp          | 34 |
| NM_028804 | Ccdc3         | 34 |
| NM_028812 | Gtf2e1        | 34 |
| NM_028870 | Cltb          | 34 |
| NM_029094 | Pik3cb        | 34 |
| NM_029522 | Gpsm2         | 34 |
| NM_029983 | Sla2          | 34 |
| NM_030021 | D730039F16Rik | 34 |
| NM_030225 | Dlst          | 34 |
| NM_031166 | Id4           | 34 |
| NM_031381 | Tex13         | 34 |
| NM_033574 | Pcdhgb1       | 34 |
| NM_033575 | Pcdhgb2       | 34 |
| NM_033576 | Pcdhgb4       | 34 |
| NM_033577 | Pcdhgb5       | 34 |
| NM_033578 | Pcdhgb6       | 34 |
| NM_033579 | Pcdhgb7       | 34 |
| NM_033580 | Pcdhgb8       | 34 |
| NM_033581 | Pcdhgc3       | 34 |
| NM_033582 | Pcdhgc4       | 34 |
| NM_033583 | Pcdhgc5       | 34 |
| NM_033584 | Pcdhga1       | 34 |
| NM_033585 | Pcdhga2       | 34 |
| NM_033586 | Pcdhga3       | 34 |
| NM_033587 | Pcdhga4       | 34 |
| NM_033588 | Pcdhga5       | 34 |
| NM_033589 | Pcdhga6       | 34 |
| NM_033590 | Pcdhga7       | 34 |
| NM_033591 | Pcdhga8       | 34 |
| NM_033592 | Pcdhga9       | 34 |
| NM_033593 | Pcdhga10      | 34 |
| NM_033594 | Pcdhga11      | 34 |
| NM_033595 | Pcdhga12      | 34 |
| NM_053108 | Glrx          | 34 |
| NM_053142 | Pcdhb17       | 34 |
| NM_133242 | Rbm39         | 34 |
| NM_133357 | Krt75         | 34 |
| NM_133687 | Cxxc5         | 34 |
| NM_134052 | Adi1          | 34 |
| NM_144783 | Wt1           | 34 |
| NM_144809 | Prdm9         | 34 |
| NM_144836 | Slc17a2       | 34 |
| NM_145227 | Oas2          | 34 |
| NM_145367 | Txndc5        | 34 |
| NM_145369 | Wfdc5         | 34 |



|              |               |    |
|--------------|---------------|----|
| NM_145427    | Atpaf2        | 34 |
| NM_146013    | Sec1414       | 34 |
| NM_146096    | Fam108b       | 34 |
| NM_146103    | Tmem185b      | 34 |
| NM_153780    | 2610044015Rik | 34 |
| NM_171824    | Pgbd5         | 34 |
| NM_172257    | Sidt2         | 34 |
| NM_172380    | Poglut1       | 34 |
| NM_172430    | Sphkap        | 34 |
| NM_172457    | Mobkl2a       | 34 |
| NM_172480    | Mtrr          | 34 |
| NM_172581    | Fam161b       | 34 |
| NM_172715    | Agpat9        | 34 |
| NM_172781    | Klh14         | 34 |
| NM_172891    | Styk1         | 34 |
| NM_173028    | Vps13a        | 34 |
| NM_173048    | Gga3          | 34 |
| NM_173397    | Fitm2         | 34 |
| NM_174857    | Mamdc2        | 34 |
| NM_175191    | Gpr22         | 34 |
| NM_175514    | Fam171b       | 34 |
| NM_177123    | Spef2         | 34 |
| NM_177708    | Rtn4r11       | 34 |
| NM_177776    | Smtn12        | 34 |
| NM_177921    | E230019M04Rik | 34 |
| NM_177993    | Hbp1          | 34 |
| NM_178115    | 2700050L05Rik | 34 |
| NM_178406    | Gpr153        | 34 |
| NM_178603    | Mrpl50        | 34 |
| NM_178629    | Ispd          | 34 |
| NM_178709    | Rnf214        | 34 |
| NM_178720    | Zpld1         | 34 |
| NM_178802    | Trim65        | 34 |
| NM_178878    | Hadha         | 34 |
| NM_178915    | Tmem179       | 34 |
| NM_181751    | Gpr119        | 34 |
| NM_194055    | Esrp1         | 34 |
| NM_197943    | Sgsm2         | 34 |
| NM_199011    | Dgkq          | 34 |
| NM_201638    | Mettl14       | 34 |
| NM_207222    | Lmo3          | 34 |
| NR_002891    | Gm5512        | 34 |
| NR_003647    | Gm5039        | 34 |
| NR_015491    | A630089N07Rik | 34 |
| NR_027666    | Fcrla         | 34 |
| NR_027785    | Polg2         | 34 |
| NR_028095    | Rabggtb       | 34 |
| NR_033210    | BC005764      | 34 |
| NR_033325    | Gm5089        | 34 |
| NR_037773    | Tmem41a       | 34 |
| NM_001002238 | Tdrd1         | 33 |
| NM_001003950 | Rab3ip        | 33 |
| NM_001013019 | Lrrn4c1       | 33 |
| NM_001024137 | Pla2g4d       | 33 |

|              |               |        |    |
|--------------|---------------|--------|----|
| NM_001024142 | Fbxo10        |        | 33 |
| NM_001024911 |               | 10-Sep | 33 |
| NM_001025378 | Orc2          |        | 33 |
| NM_001033189 | C77080        |        | 33 |
| NM_001033229 | Cyp11b1       |        | 33 |
| NM_001033379 | Dcp1b         |        | 33 |
| NM_001033468 | Gpr114        |        | 33 |
| NM_001033477 | Gm1322        |        | 33 |
| NM_001033793 | Ubtfl1        |        | 33 |
| NM_001037757 | ORF19         |        | 33 |
| NM_001038500 | Gm6084        |        | 33 |
| NM_001038641 | 2210009G21Rik |        | 33 |
| NM_001039079 | Prkcz         |        | 33 |
| NM_001039223 | Gm14137       |        | 33 |
| NM_001039676 | Slc39a2       |        | 33 |
| NM_001042699 | 4831426I19Rik |        | 33 |
| NM_001077508 | Tnfrsf9       |        | 33 |
| NM_001081093 | Arfip1        |        | 33 |
| NM_001081114 | Clip3         |        | 33 |
| NM_001081359 | Ubr5          |        | 33 |
| NM_001103182 | Lin9          |        | 33 |
| NM_001109688 | 5730419I09Rik |        | 33 |
| NM_001109745 | Cnbp          |        | 33 |
| NM_001111029 | Zfp661        |        | 33 |
| NM_001111304 | Tbcd9         |        | 33 |
| NM_001122730 | Tnrc18        |        | 33 |
| NM_001122950 | Hoxa10        |        | 33 |
| NM_001130187 | Smardc2       |        | 33 |
| NM_001141931 | Rbms1         |        | 33 |
| NM_001145967 | Atg4c         |        | 33 |
| NM_001146323 | Hps3          |        | 33 |
| NM_001159631 | Nek6          |        | 33 |
| NM_001159986 | Sec16b        |        | 33 |
| NM_001161837 | Ptprr         |        | 33 |
| NM_001162910 | Gm3604        |        | 33 |
| NM_001163616 | 1810011H11Rik |        | 33 |
| NM_001163688 | Ptptra        |        | 33 |
| NM_001166064 | Syde2         |        | 33 |
| NM_001166067 | Slc4a5        |        | 33 |
| NM_001168250 | Mtbp          |        | 33 |
| NM_001168273 | Sec24c        |        | 33 |
| NM_001170485 | Arpc4         |        | 33 |
| NM_001177408 | Gm15319       |        | 33 |
| NM_001190401 | Usp34         |        | 33 |
| NM_001190466 | Dact1         |        | 33 |
| NM_001199122 | Ghitm         |        | 33 |
| NM_001205274 | Crxos1        |        | 33 |
| NM_007509    | Atp6v1b2      |        | 33 |
| NM_007939    | Epha8         |        | 33 |
| NM_007981    | Acs11         |        | 33 |
| NM_008246    | Hiat1         |        | 33 |
| NM_008259    | Foxa1         |        | 33 |
| NM_008266    | Hoxb1         |        | 33 |
| NM_008350    | I111          |        | 33 |

|           |               |    |
|-----------|---------------|----|
| NM_008769 | Otc           | 33 |
| NM_008910 | Ppmla         | 33 |
| NM_009141 | Cxcl5         | 33 |
| NM_009257 | Serpinb5      | 33 |
| NM_009675 | Aoc3          | 33 |
| NM_009925 | Coll10a1      | 33 |
| NM_010118 | Egr2          | 33 |
| NM_010390 | H2-Q1         | 33 |
| NM_010870 | Naip5         | 33 |
| NM_010876 | Ncf1          | 33 |
| NM_010879 | Nck2          | 33 |
| NM_011026 | P2rx4         | 33 |
| NM_011037 | Pax2          | 33 |
| NM_011192 | Psme3         | 33 |
| NM_011258 | Rfc1          | 33 |
| NM_011347 | Selp          | 33 |
| NM_011494 | Stk16         | 33 |
| NM_011655 | Tubb5         | 33 |
| NM_011851 | Nt5e          | 33 |
| NM_011895 | Slc35a1       | 33 |
| NM_011930 | Clcn7         | 33 |
| NM_011937 | Gnpda1        | 33 |
| NM_011960 | Parg          | 33 |
| NM_013589 | Ltbp2         | 33 |
| NM_013923 | Rnf19a        | 33 |
| NM_015772 | Sall2         | 33 |
| NM_016801 | Stx1a         | 33 |
| NM_018748 | Golga4        | 33 |
| NM_019694 | Letm1         | 33 |
| NM_019707 | Cdh13         | 33 |
| NM_019802 | Ggcx          | 33 |
| NM_020049 | Slc6a14       | 33 |
| NM_021390 | Sall1         | 33 |
| NM_021459 | Isl1          | 33 |
| NM_021463 | Prps1         | 33 |
| NM_021475 | Adamdec1      | 33 |
| NM_021610 | Gpa33         | 33 |
| NM_023051 | Clstn1        | 33 |
| NM_023281 | Sdha          | 33 |
| NM_024241 | Kif24         | 33 |
| NM_024436 | Rab22a        | 33 |
| NM_025372 | Tipin         | 33 |
| NM_025374 | Glo1          | 33 |
| NM_025433 | Rpl171        | 33 |
| NM_025600 | Dda1          | 33 |
| NM_025852 | Rexo1         | 33 |
| NM_026327 | 1810048J11Rik | 33 |
| NM_026412 | D2Ertd750e    | 33 |
| NM_026698 | Tmem129       | 33 |
| NM_026823 | Arl8a         | 33 |
| NM_026977 | 1810031K17Rik | 33 |
| NM_027423 | Polr3b        | 33 |
| NM_027715 | Otud1         | 33 |
| NM_027834 | 9130008F23Rik | 33 |

|           |               |    |
|-----------|---------------|----|
| NM_027911 | Raver1        | 33 |
| NM_028106 | Zbed3         | 33 |
| NM_028150 | Supt71        | 33 |
| NM_028611 | 2410091C18Rik | 33 |
| NM_028724 | Rin2          | 33 |
| NM_028774 | Rnf6          | 33 |
| NM_028886 | Lrguk         | 33 |
| NM_028984 | 8430406I07Rik | 33 |
| NM_029182 | Rasd2         | 33 |
| NM_029784 | Fam81a        | 33 |
| NM_033526 | Ubqln4        | 33 |
| NM_053124 | Smarca5       | 33 |
| NM_130451 | Slc2a10       | 33 |
| NM_130892 | Rtn4ipl       | 33 |
| NM_133197 | Mcf2          | 33 |
| NM_133735 | Ptcd1         | 33 |
| NM_133928 | Chchd4        | 33 |
| NM_133967 | Zdhhc7        | 33 |
| NM_133969 | Cyp4v3        | 33 |
| NM_138582 | D17H6S56E-3   | 33 |
| NM_138952 | Ripk2         | 33 |
| NM_144535 | Mudeng        | 33 |
| NM_144795 | Pycr1         | 33 |
| NM_144813 | Slc24a1       | 33 |
| NM_144887 | Zdhhc5        | 33 |
| NM_145142 | Chst10        | 33 |
| NM_145150 | Prc1          | 33 |
| NM_145218 | Wbscr17       | 33 |
| NM_145378 | Pla2g4b       | 33 |
| NM_145582 | Ctuf1         | 33 |
| NM_145832 | Slc35c1       | 33 |
| NM_145853 | Tpcn1         | 33 |
| NM_145972 | BC027231      | 33 |
| NM_145981 | Phyhip        | 33 |
| NM_146086 | Pde6a         | 33 |
| NM_153060 | Spns2         | 33 |
| NM_153123 | Atf7ip2       | 33 |
| NM_153143 | Kctd11        | 33 |
| NM_153145 | Abca8a        | 33 |
| NM_153599 | Cdk8          | 33 |
| NM_172422 | Fastkd2       | 33 |
| NM_172539 | Ast1          | 33 |
| NM_172546 | Cnksr3        | 33 |
| NM_172840 | Vwa2          | 33 |
| NM_172947 | Lsm12         | 33 |
| NM_173391 | Tph2          | 33 |
| NM_175002 | Mmgt2         | 33 |
| NM_175246 | Snip1         | 33 |
| NM_175337 | Mlh3          | 33 |
| NM_175369 | Ccdc122       | 33 |
| NM_175434 | Slc35f3       | 33 |
| NM_175446 | Zmat1         | 33 |
| NM_175731 | Acer1         | 33 |
| NM_177047 | Auts2         | 33 |

|              |               |    |
|--------------|---------------|----|
| NM_177292    | Wscd2         | 33 |
| NM_177320    | Pik3r5        | 33 |
| NM_177695    | Tmc3          | 33 |
| NM_177828    | Arhgef37      | 33 |
| NM_177839    | Tnn           | 33 |
| NM_178641    | Inpp5f        | 33 |
| NM_178697    | Clca5         | 33 |
| NM_178747    | Gulo          | 33 |
| NM_178873    | Adck2         | 33 |
| NM_178939    | Pdrg1         | 33 |
| NM_181273    | Heph          | 33 |
| NM_181816    | Ccdc67        | 33 |
| NM_198605    | F630043A04Rik | 33 |
| NM_199446    | Phkb          | 33 |
| NR_015525    | 9430060I03Rik | 33 |
| NR_026596    | Gm5126        | 33 |
| NR_026907    | Wbscr25       | 33 |
| NR_027843    | 4933432I09Rik | 33 |
| NR_027961    | 9130230L23Rik | 33 |
| NR_027967    | Hhat1         | 33 |
| NR_033136    | Atf5          | 33 |
| NR_033486    | LOC100415784  | 33 |
| NR_037987    | LOC100503816  | 33 |
| NM_001001454 | Ttyh1         | 32 |
| NM_001005423 | Mreg          | 32 |
| NM_001011800 | Olfr212       | 32 |
| NM_001017968 | Zdhhc18       | 32 |
| NM_001033168 | 1700066B19Rik | 32 |
| NM_001033321 | Tmem231       | 32 |
| NM_001033339 | Mmp25         | 32 |
| NM_001033466 | Zbtb2         | 32 |
| NM_001033496 | Zfp213        | 32 |
| NM_001033789 | Gm5820        | 32 |
| NM_001034894 | Foxr2         | 32 |
| NM_001034896 | Tmem92-ps     | 32 |
| NM_001034898 | Ms4a15        | 32 |
| NM_001038660 | Slc7a15       | 32 |
| NM_001042620 | Dhx15         | 32 |
| NM_001045533 |               | 32 |
| NM_001048207 | Gypc          | 32 |
| NM_001080809 | Cps1          | 32 |
| NM_001080934 | Slc16a5       | 32 |
| NM_001081034 | Fbxo11        | 32 |
| NM_001081161 | Fam171a1      | 32 |
| NM_001099631 | Sh2d5         | 32 |
| NM_001099779 | Pklr          | 32 |
| NM_001100460 | Zbtb42        | 32 |
| NM_001111060 | Cd59a         | 32 |
| NM_001111078 | Uhrf1         | 32 |
| NM_001111320 | Idh1          | 32 |
| NM_001122738 | 1110028C15Rik | 32 |
| NM_001134458 | I19r          | 32 |
| NM_001141950 | Tmem80        | 32 |
| NM_001146275 | Iigpl         | 32 |

4-Mar

|              |               |    |
|--------------|---------------|----|
| NM_001146710 | 2310014H01Rik | 32 |
| NM_001159419 | Sidtl         | 32 |
| NM_001159573 | Fip1l1        | 32 |
| NM_001159948 | Als2          | 32 |
| NM_001159963 | Fbxl5         | 32 |
| NM_001162938 | Pydc3         | 32 |
| NM_001163461 | Rpap2         | 32 |
| NM_001163662 | Nucb1         | 32 |
| NM_001163689 | Pnpla2        | 32 |
| NM_001164212 | Rerg          | 32 |
| NM_001164312 | Gm4847        | 32 |
| NM_001165997 | Spopl         | 32 |
| NM_001167746 | Dnahc17       | 32 |
| NM_001167976 | Slc25a21      | 32 |
| NM_001170332 | Clec4a2       | 32 |
| NM_001172561 | Sphk2         | 32 |
| NM_001177572 | Slc25a13      | 32 |
| NM_001177715 | Gm2897        | 32 |
| NM_001199296 | Acly          | 32 |
| NM_001205367 |               | 32 |
|              | 7-Sep         |    |
| NM_007402    | Adam7         | 32 |
| NM_007563    | Bpgm          | 32 |
| NM_007678    | Cebpa         | 32 |
| NM_007891    | E2f1          | 32 |
| NM_007988    | Fasn          | 32 |
| NM_008019    | Fkbp1a        | 32 |
| NM_008021    | Foxm1         | 32 |
| NM_008043    | Frat1         | 32 |
| NM_008045    | Fshb          | 32 |
| NM_008260    | Foxa3         | 32 |
| NM_008709    | Mycn          | 32 |
| NM_008720    | Npc1          | 32 |
| NM_008800    | Pdelb         | 32 |
| NM_008909    | Ppl           | 32 |
| NM_009353    | Terf2         | 32 |
| NM_009444    | Tgoln2        | 32 |
| NM_009511    | Vipr2         | 32 |
| NM_009537    | Yy1           | 32 |
| NM_009656    | Aldh2         | 32 |
| NM_009916    | Ccr4          | 32 |
| NM_010016    | Cd55          | 32 |
| NM_010051    | Dkk1          | 32 |
| NM_010558    | I15           | 32 |
| NM_010585    | Itpr1         | 32 |
| NM_010590    | Jub           | 32 |
| NM_010797    | Mid1          | 32 |
| NM_010883    | Ndp           | 32 |
| NM_010895    | Neurod2       | 32 |
| NM_011035    | Pak1          | 32 |
| NM_011049    | Cdk16         | 32 |
| NM_011234    | Rad51         | 32 |
| NM_011403    | Slc4a1        | 32 |
| NM_011441    | Sox17         | 32 |
| NM_011535    | Tbx3          | 32 |

|           |               |    |
|-----------|---------------|----|
| NM_011762 | Zfp59         | 32 |
| NM_012037 | Vat1          | 32 |
| NM_013587 | Lrpap1        | 32 |
| NM_013901 | Slc39a1       | 32 |
| NM_013918 | Usp25         | 32 |
| NM_016853 | Stac          | 32 |
| NM_016909 | Tsnax         | 32 |
| NM_016975 | Gja3          | 32 |
| NM_020008 | Clec7a        | 32 |
| NM_021371 | Caln1         | 32 |
| NM_021518 | Rab2a         | 32 |
| NM_023554 | No17          | 32 |
| NM_023903 | Lipm          | 32 |
| NM_024472 | Gltpd1        | 32 |
| NM_026064 | 2900073G15Rik | 32 |
| NM_026485 | Trabd         | 32 |
| NM_026817 | Rab12         | 32 |
| NM_026879 | Chmp2b        | 32 |
| NM_027495 | Tmem144       | 32 |
| NM_027641 | Spef1         | 32 |
| NM_027981 | 2310002L09Rik | 32 |
| NM_028043 | D1Bwg0212e    | 32 |
| NM_028184 | Oraov1        | 32 |
| NM_028761 | Parn          | 32 |
| NM_028773 | Sash3         | 32 |
| NM_029078 | Pcf11         | 32 |
| NM_029281 | Zfp820        | 32 |
| NM_029862 | 5930434B04Rik | 32 |
| NM_030035 | Golgb1        | 32 |
| NM_031174 | Dscam         | 32 |
| NM_033218 | Srebf2        | 32 |
| NM_054070 | Afg3l1        | 32 |
| NM_054085 | Alpk3         | 32 |
| NM_054093 | Ube3b         | 32 |
| NM_080434 | Apoa5         | 32 |
| NM_080437 | Celsr3        | 32 |
| NM_080557 | Snx4          | 32 |
| NM_133806 | Uap1          | 32 |
| NM_133895 | Slc15a4       | 32 |
| NM_133933 | Rpn1          | 32 |
| NM_133947 | Numa1         | 32 |
| NM_133974 | Cdcp1         | 32 |
| NM_134250 | Havcr2        | 32 |
| NM_138748 | Ppp2r4        | 32 |
| NM_144821 | AI317395      | 32 |
| NM_144832 | BC017643      | 32 |
| NM_144934 | Mbd3l2        | 32 |
| NM_145569 | Mat2a         | 32 |
| NM_145937 | Sumf1         | 32 |
| NM_146028 | Stac2         | 32 |
| NM_146079 | Gucalb        | 32 |
| NM_153153 | Svil          | 32 |
| NM_172132 | Kdm4b         | 32 |
| NM_172604 | Scara3        | 32 |

|              |               |    |
|--------------|---------------|----|
| NM_172625    | Ino80c        | 32 |
| NM_172682    | Fam160a1      | 32 |
| NM_172723    | Adap1         | 32 |
| NM_173430    | Fkrp          | 32 |
| NM_175340    | Nhlrc1        | 32 |
| NM_175436    | Zfp526        | 32 |
| NM_175448    | Clvs2         | 32 |
| NM_175495    | Gpr150        | 32 |
| NM_176844    | Chrna5        | 32 |
| NM_177028    | 5330437I02Rik | 32 |
| NM_177135    | D830030K20Rik | 32 |
| NM_177178    | Lmbrd2        | 32 |
| NM_177261    | Kndc1         | 32 |
| NM_177335    | D930020B18Rik | 32 |
| NM_177782    | Prex1         | 32 |
| NM_177846    | Lcmt2         | 32 |
| NM_178243    | 5830403L16Rik | 32 |
| NM_178377    | Commd10       | 32 |
| NM_181040    | Atpaf1        | 32 |
| NM_181411    | Aftph         | 32 |
| NM_181750    | R3hdm1        | 32 |
| NM_181819    | Wfikkn2       | 32 |
| NM_183139    | Pld6          | 32 |
| NR_015548    | 5830432E09Rik | 32 |
| NR_027881    | 6530411M01Rik | 32 |
| NR_027956    | 1700052K11Rik | 32 |
| NR_028088    | Cox18         | 32 |
| NR_033463    | 4930429F11Rik | 32 |
| NR_033552    | Gm10125       | 32 |
| NR_037689    | Gm1968        | 32 |
| NR_037965    | Gm6644        | 32 |
| NM_001001181 | BC031181      | 31 |
| NM_001001187 | Zfp738        | 31 |
| NM_001001319 | Prame14       | 31 |
| NM_001001321 | Slc35d2       | 31 |
| NM_001003919 | Ddx11         | 31 |
| NM_001005343 | Sp9           | 31 |
| NM_001005421 | Amical        | 31 |
| NM_001010941 | Gpr12         | 31 |
| NM_001015681 | E130308A19Rik | 31 |
| NM_001033294 | Ddx31         | 31 |
| NM_001033457 | Nom1          | 31 |
| NM_001033469 | Foxr1         | 31 |
| NM_001033535 | Tnfaip813     | 31 |
| NM_001033979 | Ldlrad2       | 31 |
| NM_001038015 | Gnpda2        | 31 |
| NM_001038846 | Rcsd1         | 31 |
| NM_001039147 | Morf411       | 31 |
| NM_001042613 | Sepp1         | 31 |
| NM_001045530 | Ccnj1         | 31 |
| NM_001081282 | Ibtk          | 31 |
| NM_001081364 | Arhgap21      | 31 |
| NM_001081413 | Unc13b        | 31 |
| NM_001085419 | Gm13102       | 31 |



|              |               |    |
|--------------|---------------|----|
| NM_001100596 | Gm2002        | 31 |
| NM_001109040 | Kif21a        | 31 |
| NM_001110512 | Mettl8        | 31 |
| NM_001110780 | Syn1          | 31 |
| NM_001111059 | Cd34          | 31 |
| NM_001122680 | Pvr14         | 31 |
| NM_001123362 | Prdm12        | 31 |
| NM_001128609 | Dedd          | 31 |
| NM_001141983 | Golga7b       | 31 |
| NM_001142745 | Atat1         | 31 |
| NM_001142960 | Bcl2l15       | 31 |
| NM_001145965 | Dlgap2        | 31 |
| NM_001146268 | Pdgfrb        | 31 |
| NM_001159394 | Nfkbiz        | 31 |
| NM_001159714 | Prpf31        | 31 |
| NM_001162939 | Aen           | 31 |
| NM_001162977 | Megf6         | 31 |
| NM_001163319 | Tubgcp6       | 31 |
| NM_001163555 | Pou2f2        | 31 |
| NM_001163557 | Ppfibp2       | 31 |
| NM_001163564 | Naf1          | 31 |
| NM_001163587 | Agxt211       | 31 |
| NM_001163684 | Nosip         | 31 |
| NM_001163753 | Rab37         | 31 |
| NM_001164197 | Mmp19         | 31 |
| NM_001164314 | Wars          | 31 |
| NM_001165968 | Pglyrp4       | 31 |
| NM_001165999 | Lingo2        | 31 |
| NM_001166207 | Dpy19l2       | 31 |
| NM_001168321 | Bcor          | 31 |
| NM_001168503 | Olfir78       | 31 |
| NM_001170744 | Ctbp2         | 31 |
| NM_001171052 | Mta3          | 31 |
| NM_001177399 | Etohil        | 31 |
| NM_001177545 | Zfp600        | 31 |
| NM_001177585 | Esp34         | 31 |
| NM_001177795 | Rgs20         | 31 |
| NM_001177985 | Zmym3         | 31 |
| NM_001198859 | Ctbp1         | 31 |
| NM_001201332 | 2410004P03Rik | 31 |
| NM_001205339 | Psat1         | 31 |
| NM_007648    | Cd3e          | 31 |
| NM_007673    | Cdx2          | 31 |
| NM_007742    | Colla1        | 31 |
| NM_007814    | Cyp2b19       | 31 |
| NM_008029    | Flt4          | 31 |
| NM_008115    | Gfra2         | 31 |
| NM_008163    | Grb2          | 31 |
| NM_008232    | Hdgfl1        | 31 |
| NM_008276    | Hoxd8         | 31 |
| NM_008377    | Lrig1         | 31 |
| NM_008626    | Mrc2          | 31 |
| NM_008729    | Ctnnd2        | 31 |
| NM_008892    | Polal         | 31 |

|           |           |    |
|-----------|-----------|----|
| NM_008917 | Ppt1      | 31 |
| NM_008958 | Ptch2     | 31 |
| NM_009013 | Rad51ap1  | 31 |
| NM_009139 | Ccl6      | 31 |
| NM_009142 | Cx3cl1    | 31 |
| NM_009193 | Slbp      | 31 |
| NM_009500 | Vav2      | 31 |
| NM_009573 | Zic1      | 31 |
| NM_009643 | Ahnak     | 31 |
| NM_009745 | Bcl7b     | 31 |
| NM_009810 | Casp3     | 31 |
| NM_009863 | Cdc7      | 31 |
| NM_009879 | Ift81     | 31 |
| NM_009895 | Cish      | 31 |
| NM_009938 | Copa      | 31 |
| NM_009996 | Cyp24a1   | 31 |
| NM_010059 | Dmc1      | 31 |
| NM_010323 | Gnrhr     | 31 |
| NM_010336 | Lpar1     | 31 |
| NM_010468 | Hoxd3     | 31 |
| NM_010550 | I111ra2   | 31 |
| NM_010598 | Kcnab2    | 31 |
| NM_010717 | Limk1     | 31 |
| NM_010828 | Cited2    | 31 |
| NM_011139 | Pou2f3    | 31 |
| NM_011460 | Serpinb9d | 31 |
| NM_011586 | Myo18a    | 31 |
| NM_011626 | Tmem165   | 31 |
| NM_011636 | Plscr1    | 31 |
| NM_011692 | Vbp1      | 31 |
| NM_011789 | Apc2      | 31 |
| NM_011800 | Cdh20     | 31 |
| NM_011839 | Mab2112   | 31 |
| NM_013624 | Otog      | 31 |
| NM_013904 | Hey2      | 31 |
| NM_016688 | Pdcd7     | 31 |
| NM_016691 | Clcn5     | 31 |
| NM_016736 | Nub1      | 31 |
| NM_016981 | Slc9a1    | 31 |
| NM_019499 | Mad211    | 31 |
| NM_019516 | Lgals12   | 31 |
| NM_019551 | Tdp2      | 31 |
| NM_019568 | Cxcl14    | 31 |
| NM_019763 | Spen      | 31 |
| NM_019930 | Ranbp9    | 31 |
| NM_019941 | Zfp235    | 31 |
| NM_020277 | Trpm5     | 31 |
| NM_021487 | Kcne11    | 31 |
| NM_021890 | Fads3     | 31 |
| NM_022016 | Impg1     | 31 |
| NM_022032 | Perp      | 31 |
| NM_022881 | Rgs18     | 31 |
| NM_023230 | Ube2v1    | 31 |
| NM_023565 | Cse11     | 31 |

|           |               |    |
|-----------|---------------|----|
| NM_023603 | Sfpq          | 31 |
| NM_023653 | Wnt2          | 31 |
| NM_024180 | Ormdl2        | 31 |
| NM_025411 | 1110049F12Rik | 31 |
| NM_025701 | Trappc5       | 31 |
| NM_025807 | Slc16a9       | 31 |
| NM_025845 | Prpf38b       | 31 |
| NM_025911 | Ccdc91        | 31 |
| NM_026044 | Wdr85         | 31 |
| NM_026173 | Poc5          | 31 |
| NM_026263 | 4930519G04Rik | 31 |
| NM_026405 | Rab32         | 31 |
| NM_026444 | Cs            | 31 |
| NM_026532 | Nutf2         | 31 |
| NM_026562 | Cntd1         | 31 |
| NM_026593 | D730048I06Rik | 31 |
| NM_026637 | Ggct          | 31 |
| NM_026718 | Ankrd13a      | 31 |
| NM_026984 | M115          | 31 |
| NM_027295 | Rab28         | 31 |
| NM_027375 | Gcc2          | 31 |
| NM_027548 | Serpib7       | 31 |
| NM_027886 | Stk11ip       | 31 |
| NM_028292 | Ppme1         | 31 |
| NM_028307 | Tdrkh         | 31 |
| NM_028597 | Thoc3         | 31 |
| NM_029352 | Dusp9         | 31 |
| NM_029376 | Speer4a       | 31 |
| NM_029431 | Them4         | 31 |
| NM_029992 | Tchp          | 31 |
| NM_030074 | Zfp687        | 31 |
| NM_030172 | 2610021K21Rik | 31 |
| NM_030206 | Cygb          | 31 |
| NM_031182 | Tcfap4        | 31 |
| NM_053074 | Nup62         | 31 |
| NM_053165 | Clec2h        | 31 |
| NM_053248 | Slc5a5        | 31 |
| NM_133733 | 9030425E11Rik | 31 |
| NM_134084 | Ppif          | 31 |
| NM_138660 | Casc3         | 31 |
| NM_138955 | Abcg4         | 31 |
| NM_144847 | Nrbp2         | 31 |
| NM_144852 | Slc7a4        | 31 |
| NM_144854 | ORF63         | 31 |
| NM_144920 | Plekha5       | 31 |
| NM_145381 | Lactb2        | 31 |
| NM_145384 | Pqlc2         | 31 |
| NM_145392 | Bag2          | 31 |
| NM_145604 | D230025D16Rik | 31 |
| NM_146151 | Tesk2         | 31 |
| NM_146214 | Tat           | 31 |
| NM_152839 | Igj           | 31 |
| NM_153505 | Nckap11       | 31 |
| NM_153537 | Phldb1        | 31 |

|              |                |    |
|--------------|----------------|----|
| NM_153762    | Rnf26          | 31 |
| NM_153820    | Arhgap15       | 31 |
| NM_172277    | Snx8           | 31 |
| NM_172392    | Zfp759         | 31 |
| NM_172566    | Rundc1         | 31 |
| NM_172573    | Engase         | 31 |
| NM_172701    | Oscpl          | 31 |
| NM_172757    | Heatr3         | 31 |
| NM_172804    | Syt16          | 31 |
| NM_173384    | Sox30          | 31 |
| NM_173410    | Gpr26          | 31 |
| NM_173434    | 9930111J21Rik2 | 31 |
| NM_175539    | Dcaf1212       | 31 |
| NM_175631    | Cbln4          | 31 |
| NM_176933    | Dusp4          | 31 |
| NM_177049    | Jph4           | 31 |
| NM_177197    | Idi2           | 31 |
| NM_177345    | Mapkap1        | 31 |
| NM_177390    | Myo1d          | 31 |
| NM_177629    | AU021034       | 31 |
| NM_177661    | C130079G13Rik  | 31 |
| NM_177680    | Ythdc1         | 31 |
| NM_177753    | Sox21          | 31 |
| NM_178694    | Zer1           | 31 |
| NM_178706    | Siglech        | 31 |
| NM_181400    | Wdr47          | 31 |
| NM_181650    | Prdm4          | 31 |
| NM_183193    | Foxi2          | 31 |
| NM_197995    | Arl16          | 31 |
| NM_198658    | Nr1h5          | 31 |
| NM_199042    | Thap1          | 31 |
| NM_206973    | Gpr152         | 31 |
| NR_003519    | Pisd-ps2       | 31 |
| NR_015521    | 1700030C10Rik  | 31 |
| NR_023357    | Gm6981         | 31 |
| NR_028586    | Gm11978        | 31 |
| NR_030764    | 2700097009Rik  | 31 |
| NR_033141    | Gm6994         | 31 |
| NR_033207    | 2010016I18Rik  | 31 |
| NR_033473    | Gm13939        | 31 |
| NR_033554    | D330041H03Rik  | 31 |
| NR_037993    | B230216N24Rik  | 31 |
| NM_001002764 | Smg6           | 30 |
| NM_001005425 | Zfp663         | 30 |
| NM_001007575 | Zfp58          | 30 |
| NM_001024141 | Nxf3           | 30 |
| NM_001025427 | Hmgal          | 30 |
| NM_001025435 | BC053393       | 30 |
| NM_001029988 | Fat2           | 30 |
| NM_001032413 | Pear1          | 30 |
| NM_001033202 | Usp30          | 30 |
| NM_001037841 | Cklf           | 30 |
| NM_001039558 | C030030A07Rik  | 30 |
| NM_001077237 | BC003331       | 30 |

|              |               |    |
|--------------|---------------|----|
| NM_001079869 | Hoxb3         | 30 |
| NM_001080968 | Golga2        | 30 |
| NM_001081206 | Dgki          | 30 |
| NM_001083341 | Mboat2        | 30 |
| NM_001085409 | Steap3        | 30 |
| NM_001085535 | Cldn27        | 30 |
| NM_001100187 | Gm9705        | 30 |
| NM_001101482 | Mrap2         | 30 |
| NM_001110309 | Zfp426        | 30 |
| NM_001110778 | Adam11        | 30 |
| NM_001113379 | Lrrc32        | 30 |
| NM_001114098 | 1110012J17Rik | 30 |
| NM_001114131 | Ppp4r1        | 30 |
| NM_001145209 | Hbs11         | 30 |
| NM_001145858 | Sh3bp2        | 30 |
| NM_001159331 | N6amt1        | 30 |
| NM_001159404 | Llg11         | 30 |
| NM_001159485 | Mcf21         | 30 |
| NM_001159521 | Plxnb2        | 30 |
| NM_001159640 | Tasp1         | 30 |
| NM_001162365 | Ptk2b         | 30 |
| NM_001163141 | Krtap24-1     | 30 |
| NM_001163577 | Prom1         | 30 |
| NM_001164172 | Map2k7        | 30 |
| NM_001164362 | Cep55         | 30 |
| NM_001164621 | Rnf14         | 30 |
| NM_001164725 | Fcrl6         | 30 |
| NM_001164727 | Gm10406       | 30 |
| NM_001164820 | 2310046K01Rik | 30 |
| NM_001165902 | Ctnnb1        | 30 |
| NM_001166028 | Slfn14-ps     | 30 |
| NM_001166476 | Hmgal-rs1     | 30 |
| NM_001166653 | Cdk13         | 30 |
| NM_001177402 | 1110001A16Rik | 30 |
| NM_001177706 | Arfgap1       | 30 |
| NM_001199136 | Macf1         | 30 |
| NM_001199306 | 2810007J24Rik | 30 |
| NM_001205076 | Jph2          | 30 |
| NM_001206382 | Mavs          | 30 |
| NM_007392    | Acta2         | 30 |
| NM_007404    | Adam9         | 30 |
| NM_007454    | Ap1b1         | 30 |
| NM_007459    | Ap2a2         | 30 |
| NM_007556    | Bmp6          | 30 |
| NM_007885    | Slc26a2       | 30 |
| NM_008046    | Fst           | 30 |
| NM_008051    | Fut1          | 30 |
| NM_008091    | Gata3         | 30 |
| NM_008125    | Gjb2          | 30 |
| NM_008132    | Glrp1         | 30 |
| NM_008268    | Hoxb5         | 30 |
| NM_008278    | Hpgd          | 30 |
| NM_008310    | Htr1f         | 30 |
| NM_008315    | Htr7          | 30 |

|           |          |    |
|-----------|----------|----|
| NM_008453 | Klf3     | 30 |
| NM_008494 | Lfng     | 30 |
| NM_008593 | Foxd2    | 30 |
| NM_008607 | Mmp13    | 30 |
| NM_008623 | Mpz      | 30 |
| NM_008716 | Notch3   | 30 |
| NM_008859 | Prkcq    | 30 |
| NM_008938 | Prph2    | 30 |
| NM_009000 | Rab24    | 30 |
| NM_009103 | Rrm1     | 30 |
| NM_009151 | Selplg   | 30 |
| NM_009255 | Serpine2 | 30 |
| NM_009388 | Tkt      | 30 |
| NM_009411 | Tpbpa    | 30 |
| NM_009441 | Ttc3     | 30 |
| NM_009452 | Tnfsf4   | 30 |
| NM_009555 | Zfp40    | 30 |
| NM_009740 | Bcl10    | 30 |
| NM_009760 | Bnip3    | 30 |
| NM_009834 | Ccrn4l   | 30 |
| NM_009840 | Cct8     | 30 |
| NM_010055 | Dlx3     | 30 |
| NM_010119 | Ehd1     | 30 |
| NM_010157 | Esr2     | 30 |
| NM_010295 | Gclc     | 30 |
| NM_010298 | Glrb     | 30 |
| NM_010814 | Mog      | 30 |
| NM_011173 | Prosl    | 30 |
| NM_011264 | Rev3l    | 30 |
| NM_011352 | Sema7a   | 30 |
| NM_011415 | Snai2    | 30 |
| NM_011435 | Sod3     | 30 |
| NM_011488 | Stat5a   | 30 |
| NM_011522 | Syngn3   | 30 |
| NM_011684 | Vmn1r45  | 30 |
| NM_011896 | Spryl    | 30 |
| NM_013529 | Gfpt2    | 30 |
| NM_013636 | Ppplcc   | 30 |
| NM_013716 | G3bp1    | 30 |
| NM_013826 | Mocs2    | 30 |
| NM_015754 | Rbbp9    | 30 |
| NM_016889 | Insm1    | 30 |
| NM_016906 | Sec61a1  | 30 |
| NM_019388 | Cd86     | 30 |
| NM_019459 | Nphs1    | 30 |
| NM_019961 | Pex3     | 30 |
| NM_019993 | Aldh9a1  | 30 |
| NM_020329 | Dolpp1   | 30 |
| NM_021432 | Nap115   | 30 |
| NM_021434 | Gpr180   | 30 |
| NM_021500 | Maea     | 30 |
| NM_022417 | Itm2c    | 30 |
| NM_022423 | Rnf187   | 30 |
| NM_022428 | Irx6     | 30 |

|           |               |    |
|-----------|---------------|----|
| NM_022886 | Scel          | 30 |
| NM_023179 | Atp6v1g2      | 30 |
| NM_023275 | Rhoj          | 30 |
| NM_023317 | Ndel          | 30 |
| NM_023718 | Slcola6       | 30 |
| NM_025610 | Asrgl1        | 30 |
| NM_025746 | 4933415F23Rik | 30 |
| NM_025755 | Pacrgl        | 30 |
| NM_025831 | 1300014I06Rik | 30 |
| NM_026111 | Qpctl         | 30 |
| NM_026222 | Ccdc39        | 30 |
| NM_026246 | Mrpl49        | 30 |
| NM_026383 | Pnrc2         | 30 |
| NM_026389 | Poldip2       | 30 |
| NM_026453 | Mak16         | 30 |
| NM_026470 | Spata6        | 30 |
| NM_026474 | Sugt1         | 30 |
| NM_026514 | Cdc42ep3      | 30 |
| NM_026788 | Mthfd21       | 30 |
| NM_027269 | 1110034A24Rik | 30 |
| NM_027301 | Sdr9c7        | 30 |
| NM_027906 | 1300010F03Rik | 30 |
| NM_028056 | 1600002H07Rik | 30 |
| NM_028126 | Strada        | 30 |
| NM_028139 | Atxn711       | 30 |
| NM_028238 | Rab38         | 30 |
| NM_028651 | Tmtc4         | 30 |
| NM_028963 | 4933427D14Rik | 30 |
| NM_029012 | Sppl3         | 30 |
| NM_029475 | Adal          | 30 |
| NM_029550 | Keg1          | 30 |
| NM_029692 | Upp2          | 30 |
| NM_029781 | Rab36         | 30 |
| NM_030110 | Efha2         | 30 |
| NM_030152 | No13          | 30 |
| NM_030241 | Setd8         | 30 |
| NM_030695 | Lrba          | 30 |
| NM_031202 | Tyrp1         | 30 |
| NM_053123 | Smarca1       | 30 |
| NM_053145 | Pcdhb20       | 30 |
| NM_133228 | Zfp87         | 30 |
| NM_133659 | Erg           | 30 |
| NM_133753 | Errfil        | 30 |
| NM_133796 | Arhgdia       | 30 |
| NM_133821 | Phlpp1        | 30 |
| NM_133993 | Pwp1          | 30 |
| NM_134093 | Letmd1        | 30 |
| NM_138744 | Ssx2ip        | 30 |
| NM_139299 | I131ra        | 30 |
| NM_144536 | Cdkal1        | 30 |
| NM_145121 | Cacnb1        | 30 |
| NM_145219 | Lgi3          | 30 |
| NM_145377 | Trim41        | 30 |
| NM_145398 | Casd1         | 30 |

|              |               |    |
|--------------|---------------|----|
| NM_145448    | 9030617003Rik | 30 |
| NM_146018    | Flcn          | 30 |
| NM_146238    | Gemin8        | 30 |
| NM_148935    | Foxn4         | 30 |
| NM_153583    | Atg4d         | 30 |
| NM_170755    | Fam134a       | 30 |
| NM_172434    | Celf3         | 30 |
| NM_172465    | Zdhhc9        | 30 |
| NM_172485    | Thsd7b        | 30 |
| NM_172584    | Itpk1         | 30 |
| NM_172759    | Ces2e         | 30 |
| NM_172779    | Ddx26b        | 30 |
| NM_172887    | Fry           | 30 |
| NM_172991    | C030048B08Rik | 30 |
| NM_173418    | Lrit2         | 30 |
| NM_173755    | Ube2o         | 30 |
| NM_175305    | Lrrc19        | 30 |
| NM_175439    | Mars2         | 30 |
| NM_175675    | 4930471M23Rik | 30 |
| NM_177383    | Gpr21         | 30 |
| NM_177686    | Clec12a       | 30 |
| NM_177735    | Tmem130       | 30 |
| NM_177884    | AW146020      | 30 |
| NM_178259    | Abca13        | 30 |
| NM_178699    | B930041F14Rik | 30 |
| NM_178924    | Upk1b         | 30 |
| NM_181344    | C1rl          | 30 |
| NM_181416    | Arhgap11a     | 30 |
| NM_183427    | G1ra2         | 30 |
| NM_198014    | Slain1        | 30 |
| NM_198102    | Tra2a         | 30 |
| NM_198635    | Gm5134        | 30 |
| NM_199306    | Wdtd1         | 30 |
| NM_201608    | H2-M10.3      | 30 |
| NM_207228    | Tsga10        | 30 |
| NR_002700    | Gm7334        | 30 |
| NR_015490    | 4930558C23Rik | 30 |
| NR_027804    | Nagpa         | 30 |
| NR_028021    | Ppifos        | 30 |
| NR_028307    | Gm6524        | 30 |
| NR_028354    | Mvd           | 30 |
| NR_028417    | Gm7854        | 30 |
| NR_033633    | Gm8709        | 30 |
| NR_033804    | Art2a-ps      | 30 |
| NR_038116    | Cxcl11        | 30 |
| NR_038130    | 4930474N09Rik | 30 |
| NM_001001152 | Zfp458        | 29 |
| NM_001005858 | I830012016Rik | 29 |
| NM_001009544 | 4921501E09Rik | 29 |
| NM_001010973 | Hrh2          | 29 |
| NM_001013405 | D9Ertd402e    | 29 |
| NM_001024385 | Cr1s1         | 29 |
| NM_001024932 | Pilrb2        | 29 |
| NM_001025379 | Sema3g        | 29 |



|              |                    |    |
|--------------|--------------------|----|
| NM_001029930 | ENSMUSG00000068790 | 29 |
| NM_001033247 | Wdr52              | 29 |
| NM_001033440 | Gm1587             | 29 |
| NM_001033540 | Gm5113             | 29 |
| NM_001037754 | Baiap2             | 29 |
| NM_001037929 | Gm14092            | 29 |
| NM_001039220 | AI429214           | 29 |
| NM_001039965 | Zfp869             | 29 |
| NM_001040085 | Syt12              | 29 |
| NM_001040691 | Ung                | 29 |
| NM_001042660 | Smad7              | 29 |
| NM_001080793 | Ash21              | 29 |
| NM_001080820 | Cass4              | 29 |
| NM_001081022 | D430042009Rik      | 29 |
| NM_001081038 | Btbd16             | 29 |
| NM_001081129 | Cntnap3            | 29 |
| NM_001081370 | Shank2             | 29 |
| NM_001081446 | Iqck               | 29 |
| NM_001083902 | Slc12a8            | 29 |
| NM_001099641 | Gabra6             | 29 |
| NM_001101613 | Gm11567            | 29 |
| NM_001109764 | Ctnna2             | 29 |
| NM_001113401 | Eaf2               | 29 |
| NM_001122780 | Klh125             | 29 |
| NM_001130477 | Srrm1              | 29 |
| NM_001134697 | Ctxn3              | 29 |
| NM_001135559 | Sos2               | 29 |
| NM_001145435 | 4930451C15Rik      | 29 |
| NM_001145676 | 2210408I21Rik      | 29 |
| NM_001145806 | Capn8              | 29 |
| NM_001160400 | Megf8              | 29 |
| NM_001161845 | Sgk1               | 29 |
| NM_001162904 | Mdm1               | 29 |
| NM_001163447 | Mapk8ip3           | 29 |
| NM_001163538 | Pgam5              | 29 |
| NM_001163633 | Wnt7b              | 29 |
| NM_001164573 | Myo1h              | 29 |
| NM_001164634 | Slc22a8            | 29 |
| NM_001166388 | Ptp4a3             | 29 |
| NM_001166552 | Zbed6              | 29 |
| NM_001168667 | Fam114a2           | 29 |
| NM_001170555 | Prkag2             | 29 |
| NM_001177767 | Gm13138            | 29 |
| NM_001178058 | Txnrd3             | 29 |
| NM_001190846 | Kat2b              | 29 |
| NM_001199043 | Lgals8             | 29 |
| NM_001205234 | Nrxn2              | 29 |
| NM_007416    | Adralb             | 29 |
| NM_007566    | Birc6              | 29 |
| NM_007699    | Chrm4              | 29 |
| NM_007834    | Dscr3              | 29 |
| NM_008095    | Gbas               | 29 |
| NM_008213    | Hand1              | 29 |
| NM_008231    | Hdgf               | 29 |

|           |               |    |
|-----------|---------------|----|
| NM_008422 | Kcnc3         | 29 |
| NM_008429 | Kcnj9         | 29 |
| NM_008499 | Lhx5          | 29 |
| NM_008689 | Nfkb1         | 29 |
| NM_008706 | Nqo1          | 29 |
| NM_008927 | Map2k1        | 29 |
| NM_009427 | Tob1          | 29 |
| NM_009510 | Ezr           | 29 |
| NM_009626 | Adh7          | 29 |
| NM_009721 | Atp1b1        | 29 |
| NM_009763 | Bst1          | 29 |
| NM_009843 | Ctla4         | 29 |
| NM_010009 | Cyp27b1       | 29 |
| NM_010132 | Emx2          | 29 |
| NM_010329 | Pdpn          | 29 |
| NM_010453 | Hoxa5         | 29 |
| NM_010456 | Hoxa9         | 29 |
| NM_010749 | M6pr          | 29 |
| NM_011145 | Ppard         | 29 |
| NM_011267 | Rgs16         | 29 |
| NM_011395 | Slc22a3       | 29 |
| NM_011500 | Strn          | 29 |
| NM_011711 | Fmn13         | 29 |
| NM_011732 | Ybx1          | 29 |
| NM_012058 | Srp9          | 29 |
| NM_013582 | Lhcgr         | 29 |
| NM_013586 | Lox13         | 29 |
| NM_013688 | Tctel         | 29 |
| NM_013750 | Phlda3        | 29 |
| NM_013753 | X99384        | 29 |
| NM_013813 | Epb4.113      | 29 |
| NM_015826 | Dmrt1         | 29 |
| NM_016742 | Cdc37         | 29 |
| NM_016843 | Atxn10        | 29 |
| NM_016846 | Rgl1          | 29 |
| NM_016910 | Ppm1d         | 29 |
| NM_017470 | Dnalc4        | 29 |
| NM_018777 | Cldn6         | 29 |
| NM_019949 | Ube216        | 29 |
| NM_020026 | B3galnt1      | 29 |
| NM_020044 | Lat2          | 29 |
| NM_021369 | Chrna6        | 29 |
| NM_021423 | Shank3        | 29 |
| NM_021436 | Tmeff1        | 29 |
| NM_022019 | Dusp10        | 29 |
| NM_022328 | Mllt1         | 29 |
| NM_022416 | Stk32b        | 29 |
| NM_022985 | Zfand6        | 29 |
| NM_023055 | Slc9a3r2      | 29 |
| NM_023215 | 2500003M10Rik | 29 |
| NM_023597 | Wdr31         | 29 |
| NM_023824 | Paqr4         | 29 |
| NM_024195 | Cyb5r4        | 29 |
| NM_024246 | Tmem79        | 29 |

|           |               |    |
|-----------|---------------|----|
| NM_024451 | Sun1          | 29 |
| NM_025277 | Gng10         | 29 |
| NM_025595 | Mrpl51        | 29 |
| NM_025833 | Baiap211      | 29 |
| NM_025841 | Kdelr2        | 29 |
| NM_025877 | Slc25a23      | 29 |
| NM_025932 | Syap1         | 29 |
| NM_026213 | Ttc33         | 29 |
| NM_026410 | Cdca5         | 29 |
| NM_026422 | Mrrf          | 29 |
| NM_026559 | Txndc17       | 29 |
| NM_026861 | Ubac2         | 29 |
| NM_027103 | 1700030J22Rik | 29 |
| NM_027225 | Cobl11        | 29 |
| NM_027740 | Pocl1b        | 29 |
| NM_027839 | Ceacam20      | 29 |
| NM_028023 | Cdca4         | 29 |
| NM_028030 | Rbpms2        | 29 |
| NM_028039 | Esco2         | 29 |
| NM_028074 | Ddx42         | 29 |
| NM_028194 | Fryl          | 29 |
| NM_029062 | 4930521A18Rik | 29 |
| NM_029084 | Slamf8        | 29 |
| NM_029254 | Spdya         | 29 |
| NM_029286 | Ccdc30        | 29 |
| NM_029494 | Rab30         | 29 |
| NM_029546 | Pwp2          | 29 |
| NM_029584 | Zfp773        | 29 |
| NM_029639 | 1600029D21Rik | 29 |
| NM_029648 | D19Erttd737e  | 29 |
| NM_029745 | Tbc1d9b       | 29 |
| NM_030096 | Ddx52         | 29 |
| NM_030180 | Usp54         | 29 |
| NM_030189 | 4930555I21Rik | 29 |
| NM_030601 | Clca2         | 29 |
| NM_030711 | Erap1         | 29 |
| NM_031185 | Akap12        | 29 |
| NM_033174 | Snurf         | 29 |
| NM_033474 | Arvcf         | 29 |
| NM_053069 | Atg5          | 29 |
| NM_053185 | Col4a6        | 29 |
| NM_133213 | Xpnpep2       | 29 |
| NM_133747 | Fam98a        | 29 |
| NM_133854 | Snapin        | 29 |
| NM_133886 | AU040320      | 29 |
| NM_133898 | N4bp211       | 29 |
| NM_134078 | Chmp7         | 29 |
| NM_134133 | 2010002N04Rik | 29 |
| NM_138742 | Nap113        | 29 |
| NM_144853 | Cyyr1         | 29 |
| NM_144892 | Ncoa5         | 29 |
| NM_144946 | Neto1         | 29 |
| NM_145148 | Frmd4b        | 29 |
| NM_145220 | App12         | 29 |

|              |                 |    |
|--------------|-----------------|----|
| NM_145465    | Stk24           | 29 |
| NM_145986    | Fam83f          | 29 |
| NM_146126    | Sord            | 29 |
| NM_148924    | Zfp263          | 29 |
| NM_153078    | Ehbp1           | 29 |
| NM_153562    | Rrnad1          | 29 |
| NM_153744    | Prkag3          | 29 |
| NM_172473    | Hac1            | 29 |
| NM_172508    | Dse             | 29 |
| NM_172612    | Rnd1            | 29 |
| NM_172738    | Zfp954          | 29 |
| NM_172770    | Ttc12           | 29 |
| NM_172913    | Tox3            | 29 |
| NM_175386    | Lhfp            | 29 |
| NM_175556    | Plch2           | 29 |
| NM_175632    | Oscar           | 29 |
| NM_176837    | Arhgap18        | 29 |
| NM_177352    | Gk5             | 29 |
| NM_177429    | Ofd1            | 29 |
| NM_177566    | Arhgef15        | 29 |
| NM_177688    | H2afj           | 29 |
| NM_177876    | Vps37b          | 29 |
| NM_178624    | Fbx12           | 29 |
| NM_178763    | Zfp750          | 29 |
| NM_183141    | Elfn2           | 29 |
| NM_183154    | Zfyve1          | 29 |
| NM_197999    | Ces2g           | 29 |
| NM_198190    | Ntf5            | 29 |
| NM_198414    | Paqr9           | 29 |
| NM_201370    | Wee2            | 29 |
| NM_207298    | Cercam          | 29 |
| NR_004443    | Nphslas         | 29 |
| NR_015475    | 1700086006Rik   | 29 |
| NR_015488    | A930003A15Rik   | 29 |
| NR_027008    | Gt (ROSA) 26Sor | 29 |
| NR_027988    | 4930433N12Rik   | 29 |
| NR_029445    | 4930584F24Rik   | 29 |
| NR_030682    | 2810410L24Rik   | 29 |
| NR_033447    | 2810405F15Rik   | 29 |
| NR_033638    | Olfcr29-ps1     | 29 |
| NM_001001796 | Prrxl1          | 28 |
| NM_001003893 | Masp2           | 28 |
| NM_001004142 | Nlrpla          | 28 |
| NM_001007573 | Maneal          | 28 |
| NM_001013770 | Lipol           | 28 |
| NM_001015039 | Zfyve28         | 28 |
| NM_001033277 | Spryd3          | 28 |
| NM_001033435 | Gm885           | 28 |
| NM_001039474 | Tcerg1          | 28 |
| NM_001039581 | Abca3           | 28 |
| NM_001042489 | Hvcn1           | 28 |
| NM_001103158 | Gm13242         | 28 |
| NM_001122830 | Klh126          | 28 |
| NM_001126324 | Gm13083         | 28 |

|              |               |    |
|--------------|---------------|----|
| NM_001130515 | Hexim2        | 28 |
| NM_001134791 | Osbp19        | 28 |
| NM_001135112 | Dnaja3        | 28 |
| NM_001141971 | 5730494N06Rik | 28 |
| NM_001142335 | Lmo2          | 28 |
| NM_001145778 | Zkscan3       | 28 |
| NM_001159638 | 0610012H03Rik | 28 |
| NM_001159697 | Ccdc48        | 28 |
| NM_001163457 | Mttp          | 28 |
| NM_001163691 | Cacnalh       | 28 |
| NM_001163702 | Fbxo27        | 28 |
| NM_001167879 | Fam59b        | 28 |
| NM_001167925 | A730017C20Rik | 28 |
| NM_001168346 | Nfatc4        | 28 |
| NM_001168470 | Tmem93        | 28 |
| NM_001172073 | Ttc4          | 28 |
| NM_001198985 | Tjp2          | 28 |
| NM_001199003 | Rgs7          | 28 |
| NM_001202500 | Armcx4        | 28 |
| NM_007460    | Ap3d1         | 28 |
| NM_007553    | Bmp2          | 28 |
| NM_007746    | Map3k8        | 28 |
| NM_007782    | Csf3r         | 28 |
| NM_007790    | Smc3          | 28 |
| NM_007810    | Cyp19a1       | 28 |
| NM_007913    | Egr1          | 28 |
| NM_007924    | E11           | 28 |
| NM_007934    | Enpep         | 28 |
| NM_008082    | Galr1         | 28 |
| NM_008104    | Gcm2          | 28 |
| NM_008133    | Glud1         | 28 |
| NM_008251    | Hmgn1         | 28 |
| NM_008343    | Igfbp3        | 28 |
| NM_008359    | I117ra        | 28 |
| NM_008392    | Irg1          | 28 |
| NM_008403    | Itgblbp1      | 28 |
| NM_008438    | Kera          | 28 |
| NM_008516    | Lrrn1         | 28 |
| NM_008622    | Mpv17         | 28 |
| NM_008676    | Nbr1          | 28 |
| NM_008795    | Cdk18         | 28 |
| NM_008941    | Tmprss15      | 28 |
| NM_008995    | Pex5          | 28 |
| NM_009137    | Cc122         | 28 |
| NM_009305    | Syp           | 28 |
| NM_009323    | Tbx15         | 28 |
| NM_009447    | Tuba4a        | 28 |
| NM_009531    | Xpc           | 28 |
| NM_009612    | Acvr11        | 28 |
| NM_009661    | Alox8         | 28 |
| NM_009681    | Ap3s1         | 28 |
| NM_010104    | Edn1          | 28 |
| NM_010191    | Fdft1         | 28 |
| NM_010234    | Fos           | 28 |

|           |               |    |
|-----------|---------------|----|
| NM_010403 | Hao1          | 28 |
| NM_010418 | Herc2         | 28 |
| NM_010481 | Hspa9         | 28 |
| NM_011060 | Padi3         | 28 |
| NM_011102 | Prkcc         | 28 |
| NM_011176 | St14          | 28 |
| NM_011443 | Sox2          | 28 |
| NM_011693 | Vcam1         | 28 |
| NM_011718 | Wnt10b        | 28 |
| NM_011724 | Xirp1         | 28 |
| NM_011752 | Zfp259        | 28 |
| NM_011943 | Map2k6        | 28 |
| NM_011977 | Slc27a1       | 28 |
| NM_012056 | Fkbp9         | 28 |
| NM_013774 | Tc11b4        | 28 |
| NM_013790 | Abcc5         | 28 |
| NM_013812 | Cdk2ap1       | 28 |
| NM_013873 | Sult4a1       | 28 |
| NM_015732 | Axin2         | 28 |
| NM_016708 | Npy5r         | 28 |
| NM_016879 | Krt85         | 28 |
| NM_019656 | Tspan6        | 28 |
| NM_019741 | Slc2a5        | 28 |
| NM_019766 | Ptges3        | 28 |
| NM_019869 | Rbm14         | 28 |
| NM_019874 | Dnajb5        | 28 |
| NM_020287 | Insm2         | 28 |
| NM_020510 | Fzd2          | 28 |
| NM_021355 | Fmod          | 28 |
| NM_021510 | Hnrnph1       | 28 |
| NM_021552 | Nsa2          | 28 |
| NM_022030 | Sv2a          | 28 |
| NM_022884 | Bhmt2         | 28 |
| NM_023785 | Ppbp          | 28 |
| NM_024457 | Rap1b         | 28 |
| NM_025312 | Sostdc1       | 28 |
| NM_025453 | Tm4sf20       | 28 |
| NM_025609 | Tab1          | 28 |
| NM_025682 | Pspc1         | 28 |
| NM_025760 | Ptplad2       | 28 |
| NM_025776 | Rbm22         | 28 |
| NM_026034 | Armc10        | 28 |
| NM_026054 | 2810474019Rik | 28 |
| NM_026110 | Gcfc1         | 28 |
| NM_026154 | Mrpl10        | 28 |
| NM_026223 | Glipr112      | 28 |
| NM_026239 | Tmem35        | 28 |
| NM_026341 | Nudt13        | 28 |
| NM_026400 | Dnajb11       | 28 |
| NM_026431 | 1810043G02Rik | 28 |
| NM_026472 | Mki67ip       | 28 |
| NM_026479 | Zcchc10       | 28 |
| NM_026667 | Fam114a1      | 28 |
| NM_026805 | Svop          | 28 |

|           |               |    |
|-----------|---------------|----|
| NM_027182 | Trip13        | 28 |
| NM_027395 | Baspl         | 28 |
| NM_027475 | Ecd           | 28 |
| NM_027665 | Adam30        | 28 |
| NM_028075 | Tnfrsf13c     | 28 |
| NM_028883 | 4632415K11Rik | 28 |
| NM_029409 | Mff           | 28 |
| NM_029631 | Abhd14b       | 28 |
| NM_029814 | Chmp5         | 28 |
| NM_029930 | Fam115a       | 28 |
| NM_030733 | Gpr63         | 28 |
| NM_053194 | Ric8          | 28 |
| NM_053195 | Slc24a3       | 28 |
| NM_053273 | Ttyh2         | 28 |
| NM_133229 | Ripply3       | 28 |
| NM_133664 | Lad1          | 28 |
| NM_133684 | Mosc2         | 28 |
| NM_133792 | Pla2g15       | 28 |
| NM_133927 | Itfg2         | 28 |
| NM_138605 | Ppp1r3f       | 28 |
| NM_138667 | Tab2          | 28 |
| NM_139063 | Muted         | 28 |
| NM_144848 | Eppk1         | 28 |
| NM_145433 | Mrm1          | 28 |
| NM_145600 | Zfp330        | 28 |
| NM_145628 | Usp11         | 28 |
| NM_145841 | Sgcz          | 28 |
| NM_146144 | Usp1          | 28 |
| NM_146215 | Ftsjd1        | 28 |
| NM_146246 | Rp111         | 28 |
| NM_153094 | Klrb1f        | 28 |
| NM_153097 | Trim60        | 28 |
| NM_153509 | AF529169      | 28 |
| NM_153578 | Nipal         | 28 |
| NM_153781 | Pygb          | 28 |
| NM_170673 | Cpne9         | 28 |
| NM_172050 | Cd300e        | 28 |
| NM_172308 | Mthfd11       | 28 |
| NM_172309 | Arnt12        | 28 |
| NM_172704 | Dnajc11       | 28 |
| NM_172813 | Enox1         | 28 |
| NM_172907 | Olfml1        | 28 |
| NM_172953 | Serpina5      | 28 |
| NM_173382 | 2810046L04Rik | 28 |
| NM_175031 | Stk36         | 28 |
| NM_175116 | Lpar6         | 28 |
| NM_175238 | Rif1          | 28 |
| NM_175290 | Nlrp4f        | 28 |
| NM_175313 | A130022J15Rik | 28 |
| NM_175437 | Pion          | 28 |
| NM_175506 | Adamts19      | 28 |
| NM_175519 | Kctd8         | 28 |
| NM_175548 | Lsamp         | 28 |
| NM_175639 | Wdr43         | 28 |

|              |               |    |
|--------------|---------------|----|
| NM_177055    | A630001G21Rik | 28 |
| NM_177075    | C030019I05Rik | 28 |
| NM_177325    | Tsr1          | 28 |
| NM_177342    | Taf5          | 28 |
| NM_177460    | Parp16        | 28 |
| NM_177672    | Tmem201       | 28 |
| NM_177740    | Rgma          | 28 |
| NM_178605    | Nop16         | 28 |
| NM_178664    | B3gnt11       | 28 |
| NM_178741    | Klh18         | 28 |
| NM_178795    | Ppip5k1       | 28 |
| NM_178899    | Hepacam2      | 28 |
| NM_181412    | Zbed4         | 28 |
| NM_198659    | B930007M17Rik | 28 |
| NM_198866    | Dbpht2        | 28 |
| NM_199065    | Slitrk1       | 28 |
| NM_207176    | Tes           | 28 |
| NM_212468    | Ssbp1         | 28 |
| NR_002889    | Gm5801        | 28 |
| NR_003631    | Gm6578        | 28 |
| NR_003643    | 1700123L14Rik | 28 |
| NR_004446    | H2-K2         | 28 |
| NR_015460    | 1700003H04Rik | 28 |
| NR_024558    | Gm11166       | 28 |
| NR_027798    | Gm11961       | 28 |
| NR_029446    | 6230400D17Rik | 28 |
| NR_033144    | 4921524J17Rik | 28 |
| NR_033215    | 3000002C10Rik | 28 |
| NR_033511    | Gm10510       | 28 |
| NR_033993    | Dnajc24       | 28 |
| NM_001005232 | Dbx1          | 27 |
| NM_001005510 | Syne2         | 27 |
| NM_001008427 | Gm5595        | 27 |
| NM_001012400 | AU022252      | 27 |
| NM_001013757 | Vwde          | 27 |
| NM_001024512 | Fam149b       | 27 |
| NM_001024806 | Cebpz         | 27 |
| NM_001033397 | Krt26         | 27 |
| NM_001037736 | Arhgef10      | 27 |
| NM_001037761 | Capzb         | 27 |
| NM_001039137 | Scoc          | 27 |
| NM_001039658 | Mt15          | 27 |
| NM_001042617 | Cadps         | 27 |
| NM_001043335 | Em11          | 27 |
| NM_001044389 | Clpx          | 27 |
| NM_001077631 | 2010321M09Rik | 27 |
| NM_001079690 | Slc12a1       | 27 |
| NM_001080979 | Tead4         | 27 |
| NM_001081234 | Pigg          | 27 |
| NM_001081322 | Myo5c         | 27 |
| NM_001081416 | Fndc1         | 27 |
| NM_001081462 | Gtf2ird1      | 27 |
| NM_001081633 | Dgcr14        | 27 |
| NM_001083887 | Pars2         | 27 |



|              |               |    |
|--------------|---------------|----|
| NM_001083890 | 4932441B19Rik | 27 |
| NM_001097621 | Kif26a        | 27 |
| NM_001100109 | Srp54b        | 27 |
| NM_001109991 | Col18a1       | 27 |
| NM_001110273 | Slc14a2       | 27 |
| NM_001110327 | Dmtf1         | 27 |
| NM_001111099 | Cdkn1a        | 27 |
| NM_001111331 | Kcnip3        | 27 |
| NM_001122640 | Arhgap17      | 27 |
| NM_001122963 | Gpbpl         | 27 |
| NM_001127363 | Inpp5a        | 27 |
| NM_001131021 | D630003M21Rik | 27 |
| NM_001136058 | Crmp1         | 27 |
| NM_001142580 | Vipar         | 27 |
| NM_001145759 | 4930571K23Rik | 27 |
| NM_001146087 | I11f5         | 27 |
| NM_001161406 | Grhl1         | 27 |
| NM_001161413 | Slc3a2        | 27 |
| NM_001163182 | Plekhb1       | 27 |
| NM_001163328 | Raly1         | 27 |
| NM_001163379 | Agpat1        | 27 |
| NM_001163389 | Snx11         | 27 |
| NM_001163472 | Cyp2d22       | 27 |
| NM_001163625 | Sult6b1       | 27 |
| NM_001164236 | 1700034J05Rik | 27 |
| NM_001165930 | Glt8d1        | 27 |
| NM_001165949 | Pias3         | 27 |
| NM_001166427 | Hnrnpf        | 27 |
| NM_001166635 | Midlip1       | 27 |
| NM_001167832 | Zfp764        | 27 |
| NM_001172481 | Aspn          | 27 |
| NM_001177510 | 4933402N22Rik | 27 |
| NM_001177574 | Gm2022        | 27 |
| NM_001177719 | Madd          | 27 |
| NM_001193271 | Meis1         | 27 |
| NM_001199188 | Snx5          | 27 |
| NM_001199242 | Kcnip4        | 27 |
| NM_001199265 | Epb4.112      | 27 |
| NM_001205226 | Cnot1         | 27 |
| NM_007420    | Adrb2         | 27 |
| NM_007441    | Alx3          | 27 |
| NM_007498    | Atf3          | 27 |
| NM_007500    | Atoh1         | 27 |
| NM_007523    | Bak1          | 27 |
| NM_007853    | Degs1         | 27 |
| NM_008093    | Gata5         | 27 |
| NM_008253    | Hmgb3         | 27 |
| NM_008580    | Map3k5        | 27 |
| NM_008611    | Mmp8          | 27 |
| NM_008773    | P2ry2         | 27 |
| NM_008872    | Plat          | 27 |
| NM_008883    | Plxna3        | 27 |
| NM_009144    | Sfrp2         | 27 |
| NM_009172    | Siah1a        | 27 |

|           |               |    |
|-----------|---------------|----|
| NM_009269 | Sptlc1        | 27 |
| NM_009327 | Hnfla         | 27 |
| NM_009466 | Ugdh          | 27 |
| NM_009479 | Uros          | 27 |
| NM_009739 | Bckdk         | 27 |
| NM_009827 | Cckar         | 27 |
| NM_009878 | Cdkn2d        | 27 |
| NM_009903 | Cldn4         | 27 |
| NM_010123 | Eif3a         | 27 |
| NM_010183 | Fbrs          | 27 |
| NM_010233 | Fn1           | 27 |
| NM_010343 | Gpx5          | 27 |
| NM_010615 | Kif11         | 27 |
| NM_010721 | Lmb1          | 27 |
| NM_010935 | Npy6r         | 27 |
| NM_011215 | Ptprn2        | 27 |
| NM_011218 | Ptprs         | 27 |
| NM_011243 | Rarb          | 27 |
| NM_011316 | Saa4          | 27 |
| NM_011859 | Osr1          | 27 |
| NM_011959 | Orc5          | 27 |
| NM_013831 | Pstpip2       | 27 |
| NM_013851 | Abca8b        | 27 |
| NM_015728 | Slc33a1       | 27 |
| NM_018776 | Cr1f3         | 27 |
| NM_018887 | Cyp39a1       | 27 |
| NM_019405 | Cetn2         | 27 |
| NM_019472 | Myo10         | 27 |
| NM_019485 | O1fr70        | 27 |
| NM_019506 | Gdf2          | 27 |
| NM_019683 | Ankrd49       | 27 |
| NM_019760 | Serinc1       | 27 |
| NM_019772 | 1110004F10Rik | 27 |
| NM_019804 | B4gal t4      | 27 |
| NM_019957 | Dnase2b       | 27 |
| NM_019973 | Son           | 27 |
| NM_020046 | Dhodh         | 27 |
| NM_020274 | Htr3b         | 27 |
| NM_020605 | Jph3          | 27 |
| NM_021472 | Rnase4        | 27 |
| NM_021511 | Rrs1          | 27 |
| NM_022026 | Aqp9          | 27 |
| NM_022319 | Clstn2        | 27 |
| NM_022813 | Scamp2        | 27 |
| NM_023138 | Map2k2        | 27 |
| NM_023579 | Ipo5          | 27 |
| NM_023850 | Chst1         | 27 |
| NM_024251 | Aplf          | 27 |
| NM_025285 | Stmn2         | 27 |
| NM_025423 | 1110059E24Rik | 27 |
| NM_025512 | Zfand1        | 27 |
| NM_025519 | Chmp4c        | 27 |
| NM_025642 | 2610039C10Rik | 27 |
| NM_025676 | Mcm8          | 27 |

|           |               |    |
|-----------|---------------|----|
| NM_025778 | Bcl2l14       | 27 |
| NM_025848 | Sdhd          | 27 |
| NM_025868 | Tmx2          | 27 |
| NM_025907 | Mettl6        | 27 |
| NM_025997 | Fam103a1      | 27 |
| NM_026048 | Cinp          | 27 |
| NM_026085 | Pbld2         | 27 |
| NM_026130 | Srpr          | 27 |
| NM_026201 | Ccar1         | 27 |
| NM_026225 | Cog6          | 27 |
| NM_026255 | Slc25a26      | 27 |
| NM_026374 | Ilf2          | 27 |
| NM_026384 | Dgat2         | 27 |
| NM_026402 | Atg3          | 27 |
| NM_026420 | Paip2         | 27 |
| NM_026442 | Cmc1          | 27 |
| NM_026620 | Fam98b        | 27 |
| NM_026936 | Oxal1         | 27 |
| NM_027088 | Bap1          | 27 |
| NM_027403 | Psg21         | 27 |
| NM_027416 | Calml3        | 27 |
| NM_027422 | Mier2         | 27 |
| NM_027460 | Slc25a33      | 27 |
| NM_027937 | Caskin1       | 27 |
| NM_028041 | Ddx54         | 27 |
| NM_028725 | Sdr42e1       | 27 |
| NM_028887 | Smchd1        | 27 |
| NM_029131 | 4930503E14Rik | 27 |
| NM_029252 | 4930563D23Rik | 27 |
| NM_029398 | Tmem14a       | 27 |
| NM_029722 | Gje1          | 27 |
| NM_029789 | Lass2         | 27 |
| NM_030013 | Cyp20a1       | 27 |
| NM_030210 | Aacs          | 27 |
| NM_030596 | Dsg3          | 27 |
| NM_031863 | Cenpq         | 27 |
| NM_031875 | Otof          | 27 |
| NM_053139 | Pcdhb14       | 27 |
| NM_053147 | Pcdhb22       | 27 |
| NM_080446 | Helb          | 27 |
| NM_080850 | Pask          | 27 |
| NM_130457 | Cntnap4       | 27 |
| NM_133241 | Mlc1          | 27 |
| NM_133681 | Tspan1        | 27 |
| NM_133722 | Fam108c       | 27 |
| NM_133805 | Cops8         | 27 |
| NM_133937 | 6720456B07Rik | 27 |
| NM_134247 | Acot4         | 27 |
| NM_139305 | Car9          | 27 |
| NM_144545 | Eif3j         | 27 |
| NM_144935 | BC018242      | 27 |
| NM_145387 | Athl1         | 27 |
| NM_145497 | BC016495      | 27 |
| NM_145922 | Kcnc4         | 27 |

|              |               |    |
|--------------|---------------|----|
| NM_145950    | Osgin2        | 27 |
| NM_146224    | Zfp280d       | 27 |
| NM_153569    | Gak           | 27 |
| NM_172534    | 4932411E22Rik | 27 |
| NM_172631    | D18Ertd653e   | 27 |
| NM_172948    | Mgat5b        | 27 |
| NM_172974    | Cops7b        | 27 |
| NM_173754    | Usp43         | 27 |
| NM_175035    | Gimap5        | 27 |
| NM_175118    | Dusp28        | 27 |
| NM_175154    | Galk2         | 27 |
| NM_175392    | Fam73b        | 27 |
| NM_175467    | Sptlc3        | 27 |
| NM_175486    | 6430571L13Rik | 27 |
| NM_175554    | Clspn         | 27 |
| NM_175751    | Zfp608        | 27 |
| NM_177016    | Slc17a4       | 27 |
| NM_177296    | Tnpo3         | 27 |
| NM_177474    | D19Bwgl357e   | 27 |
| NM_177747    | Zfp711        | 27 |
| NM_177880    | 4933411G11Rik | 27 |
| NM_178162    | Agfg2         | 27 |
| NM_178635    | Uvrag         | 27 |
| NM_178755    | Agbl2         | 27 |
| NM_178901    | AI467606      | 27 |
| NM_178928    | Afap111       | 27 |
| NM_181397    | Rftnl         | 27 |
| NM_181403    | Vps37c        | 27 |
| NM_181419    | Zfp599        | 27 |
| NM_183186    | Foxn3         | 27 |
| NM_183289    | Tcerg11       | 27 |
| NM_183319    | Xkrx          | 27 |
| NM_198100    | Tbkbp1        | 27 |
| NM_198163    | Rab35         | 27 |
| NM_198664    | Tbc1d2        | 27 |
| NM_201363    | Serpnb3c      | 27 |
| NM_203490    | Mrgprd        | 27 |
| NM_206974    | Kcnrg         | 27 |
| NM_207244    | Cd200r4       | 27 |
| NM_213727    | Fam123c       | 27 |
| NR_002928    | Gm1943        | 27 |
| NR_003523    | H2afy3        | 27 |
| NR_027800    | Gm16516       | 27 |
| NR_028081    | 1700040I03Rik | 27 |
| NR_033551    | Gm12359       | 27 |
| NM_001001792 | Zfp239        | 26 |
| NM_001003912 | Arhgef11      | 26 |
| NM_001005247 | Hps5          | 26 |
| NM_001005916 | Zbtb9         | 26 |
| NM_001007584 | Gm11541       | 26 |
| NM_001012518 | Ehmt1         | 26 |
| NM_001013389 | Mrs2          | 26 |
| NM_001024147 | Gm5868        | 26 |
| NM_001029876 | Urb2          | 26 |

|              |               |    |
|--------------|---------------|----|
| NM_001029993 | Zc3h18        | 26 |
| NM_001030305 | Pmp2          | 26 |
| NM_001033041 | Acmsd         | 26 |
| NM_001033263 | Agap2         | 26 |
| NM_001033269 | Eif4e1b       | 26 |
| NM_001033313 | Pdap1         | 26 |
| NM_001033334 | Tmem90a       | 26 |
| NM_001033350 | Bank1         | 26 |
| NM_001033420 | Dock1         | 26 |
| NM_001033493 | Gpr111        | 26 |
| NM_001035509 | Zcchc18       | 26 |
| NM_001037717 | Slc38a6       | 26 |
| NM_001037931 | Gm6878        | 26 |
| NM_001039047 | Trim58        | 26 |
| NM_001039231 | Zfp951        | 26 |
| NM_001039533 | Pdxdc1        | 26 |
| NM_001039710 | Coq10b        | 26 |
| NM_001042653 | Oip5          | 26 |
| NM_001045539 | Xlr5a         | 26 |
| NM_001081127 | Adamts14      | 26 |
| NM_001081208 | Hs3st5        | 26 |
| NM_001081328 | Chsy3         | 26 |
| NM_001081337 | Sipal12       | 26 |
| NM_001081392 | Mdn1          | 26 |
| NM_001101605 | Gm14446       | 26 |
| NM_001111272 | Stau2         | 26 |
| NM_001113419 | Iqcj-schip1   | 26 |
| NM_001113420 | Schip1        | 26 |
| NM_001114140 | Tcf20         | 26 |
| NM_001122949 | Mpl           | 26 |
| NM_001136059 | Cypl1a1       | 26 |
| NM_001145955 | Pigv          | 26 |
| NM_001146198 | Nkx2-1        | 26 |
| NM_001159583 | 2310028H24Rik | 26 |
| NM_001160415 | Apobec3       | 26 |
| NM_001161796 | Gucylb3       | 26 |
| NM_001163569 | Kif9          | 26 |
| NM_001163608 | Plxdc1        | 26 |
| NM_001163622 | Prepl         | 26 |
| NM_001163628 | Lym5          | 26 |
| NM_001163818 | Ppp1r10       | 26 |
| NM_001163836 | Pabpc6        | 26 |
| NM_001164376 | Ctnna3        | 26 |
| NM_001166029 | 2010015L04Rik | 26 |
| NM_001166669 | Gemin5        | 26 |
| NM_001167592 | Pate-dj       | 26 |
| NM_001167730 | Rad18         | 26 |
| NM_001168253 | Fam83h        | 26 |
| NM_001168564 | Kcns3         | 26 |
| NM_001170479 | Loh12cr1      | 26 |
| NM_001170911 | Prr13         | 26 |
| NM_001172092 | Depdc1a       | 26 |
| NM_001172099 | Cuedc1        | 26 |
| NM_001177628 | Slc45a3       | 26 |

|              |          |    |
|--------------|----------|----|
| NM_001177673 | Gpr68    | 26 |
| NM_001198765 | Postn    | 26 |
| NM_001199048 | Zfp942   | 26 |
| NM_001199186 | Slc44a2  | 26 |
| NM_001200055 | AU018829 | 26 |
| NM_001205286 | Tmem39a  | 26 |
| NM_007489    | Arntl    | 26 |
| NM_007510    | Atp6v1e1 | 26 |
| NM_007741    | Col9a2   | 26 |
| NM_007784    | Csn1s1   | 26 |
| NM_007855    | Twist2   | 26 |
| NM_007859    | Dffb     | 26 |
| NM_007860    | Dio1     | 26 |
| NM_007966    | Evx1     | 26 |
| NM_008077    | Gad1     | 26 |
| NM_008208    | H2-T3    | 26 |
| NM_008234    | Hells    | 26 |
| NM_008249    | Tfb2m    | 26 |
| NM_008621    | Mpp1     | 26 |
| NM_008625    | Mrc1     | 26 |
| NM_008670    | Naip1    | 26 |
| NM_008719    | Npas2    | 26 |
| NM_008780    | Pax1     | 26 |
| NM_008856    | Prkch    | 26 |
| NM_008923    | Prkar1b  | 26 |
| NM_009056    | Rfx2     | 26 |
| NM_009115    | S100b    | 26 |
| NM_009338    | Acat2    | 26 |
| NM_009464    | Ucp3     | 26 |
| NM_009493    | Vmn2r42  | 26 |
| NM_009598    | Ace      | 26 |
| NM_009680    | Ap3b1    | 26 |
| NM_009796    | Capn7    | 26 |
| NM_009868    | Cdh5     | 26 |
| NM_009887    | Cer1     | 26 |
| NM_009912    | Ccr1     | 26 |
| NM_009919    | Cnih     | 26 |
| NM_009928    | Coll15a1 | 26 |
| NM_010121    | Eif2ak3  | 26 |
| NM_010217    | Ctgf     | 26 |
| NM_010277    | Gfap     | 26 |
| NM_010423    | Hey1     | 26 |
| NM_010501    | Ifit3    | 26 |
| NM_010684    | Lamp1    | 26 |
| NM_010778    | Cd46     | 26 |
| NM_010911    | Nfs1     | 26 |
| NM_010932    | Pnoc     | 26 |
| NM_011082    | Pigr     | 26 |
| NM_011203    | Ptpn12   | 26 |
| NM_011326    | Scnn1g   | 26 |
| NM_011356    | Frzb     | 26 |
| NM_011400    | Slc2a1   | 26 |
| NM_011543    | Skpl1a   | 26 |
| NM_011625    | Ppp1r13b | 26 |

|           |               |    |
|-----------|---------------|----|
| NM_011667 | Ubely1        | 26 |
| NM_011746 | Mkrn3         | 26 |
| NM_011873 | Dazap2        | 26 |
| NM_012054 | Aoah          | 26 |
| NM_013553 | Hoxc4         | 26 |
| NM_013590 | Lyz1          | 26 |
| NM_013684 | Tbp           | 26 |
| NM_013842 | Xbp1          | 26 |
| NM_013892 | Pcsk1n        | 26 |
| NM_016706 | Coil          | 26 |
| NM_016741 | Scarb1        | 26 |
| NM_016903 | Esd           | 26 |
| NM_016968 | Olig1         | 26 |
| NM_019427 | Epb4.114b     | 26 |
| NM_019511 | Ramp3         | 26 |
| NM_019573 | Wwox          | 26 |
| NM_019668 | Ube2a         | 26 |
| NM_019698 | Aldh18a1      | 26 |
| NM_019936 | Cript         | 26 |
| NM_020047 | Tacstd2       | 26 |
| NM_020568 | Plin4         | 26 |
| NM_021311 | Piwil1        | 26 |
| NM_021523 | Huwl          | 26 |
| NM_023061 | Mcam          | 26 |
| NM_023418 | Pgam1         | 26 |
| NM_023483 | 1110032A03Rik | 26 |
| NM_023663 | Ripk4         | 26 |
| NM_023842 | Dsp           | 26 |
| NM_024184 | Asf1b         | 26 |
| NM_024204 | Ankrd22       | 26 |
| NM_024215 | Zfp593        | 26 |
| NM_024217 | Cmtm3         | 26 |
| NM_024239 | Stamp         | 26 |
| NM_024456 | Rab5c         | 26 |
| NM_025345 | 0610037P05Rik | 26 |
| NM_025436 | Sc4mol        | 26 |
| NM_025542 | 2410001C21Rik | 26 |
| NM_025785 | Fbxo25        | 26 |
| NM_025820 | Crnk11        | 26 |
| NM_025865 | 2310030G06Rik | 26 |
| NM_025898 | Napa          | 26 |
| NM_025914 | Actr6         | 26 |
| NM_025958 | Cand2         | 26 |
| NM_025968 | Ptgr1         | 26 |
| NM_025993 | Mis12         | 26 |
| NM_026050 | 2810453I06Rik | 26 |
| NM_026235 | Larp6         | 26 |
| NM_026280 | Mxra7         | 26 |
| NM_026345 | Mansc1        | 26 |
| NM_026504 | Coq5          | 26 |
| NM_026557 | Rchyl         | 26 |
| NM_026594 | Rpl391        | 26 |
| NM_026685 | Tmem174       | 26 |
| NM_026933 | Triap1        | 26 |

|           |               |    |
|-----------|---------------|----|
| NM_027134 | Mtfmt         | 26 |
| NM_027149 | Wdr20a        | 26 |
| NM_027187 | Rnaseh2a      | 26 |
| NM_027296 | Trnt1         | 26 |
| NM_027571 | P2ry12        | 26 |
| NM_027741 | Mro           | 26 |
| NM_027959 | Pdia6         | 26 |
| NM_028033 | 2410012M07Rik | 26 |
| NM_028175 | Lrrc8e        | 26 |
| NM_028208 | Ptar1         | 26 |
| NM_028310 | 2810006K23Rik | 26 |
| NM_028496 | 1700031F05Rik | 26 |
| NM_028629 | Kprp          | 26 |
| NM_028643 | Efha1         | 26 |
| NM_028779 | Ampd2         | 26 |
| NM_028803 | Gbe1          | 26 |
| NM_028875 | Xrcc3         | 26 |
| NM_028908 | 4933403G14Rik | 26 |
| NM_029048 | Spdyb         | 26 |
| NM_029090 | Nat15         | 26 |
| NM_029270 | Arhgap24      | 26 |
| NM_029362 | Chmp4b        | 26 |
| NM_029385 | Nudt16        | 26 |
| NM_029467 | Tcam1         | 26 |
| NM_029495 | Epsti1        | 26 |
| NM_029835 | 5730590G19Rik | 26 |
| NM_030116 | Mrpl9         | 26 |
| NM_030704 | Hspb8         | 26 |
| NM_030739 | Vmn1r58       | 26 |
| NM_031189 | Myog          | 26 |
| NM_031367 | H28           | 26 |
| NM_053075 | Rheb          | 26 |
| NM_053246 | Dok4          | 26 |
| NM_133716 | Smap2         | 26 |
| NM_133809 | Kmo           | 26 |
| NM_133833 | Dst           | 26 |
| NM_133889 | Bsdc1         | 26 |
| NM_134081 | Dnajc9        | 26 |
| NM_134151 | Yars          | 26 |
| NM_134152 | Lpxn          | 26 |
| NM_138585 | Cherp         | 26 |
| NM_138682 | Lrrc4         | 26 |
| NM_139051 | Nr5a1         | 26 |
| NM_139297 | Ugp2          | 26 |
| NM_144533 | Nmnat3        | 26 |
| NM_144838 | Sgtb          | 26 |
| NM_144839 | Ube2e2        | 26 |
| NM_144891 | Gdap111       | 26 |
| NM_144915 | Dag1b         | 26 |
| NM_145577 | Zfp772        | 26 |
| NM_145583 | Pgap2         | 26 |
| NM_145621 | Camkv         | 26 |
| NM_145958 | Kbtbd2        | 26 |
| NM_145965 | Gphn          | 26 |



|              |               |    |
|--------------|---------------|----|
| NM_145983    | Kcna5         | 26 |
| NM_146136    | Slc16a4       | 26 |
| NM_146155    | Ahdcl         | 26 |
| NM_146188    | Kctd15        | 26 |
| NM_146254    | Wdr78         | 26 |
| NM_146650    | Olfrl166      | 26 |
| NM_148928    | Gtf3c5        | 26 |
| NM_152915    | Dner          | 26 |
| NM_153083    | Thtpa         | 26 |
| NM_172454    | Panx3         | 26 |
| NM_172703    | Eif4g3        | 26 |
| NM_172921    | Fam55d        | 26 |
| NM_173024    | Serpina3b     | 26 |
| NM_174870    | Slc26a1       | 26 |
| NM_175223    | Dnalil        | 26 |
| NM_175256    | Heg1          | 26 |
| NM_175411    | Fam118b       | 26 |
| NM_175500    | Gpc5          | 26 |
| NM_175530    | Fbxo46        | 26 |
| NM_175930    | Rapgef5       | 26 |
| NM_177060    | Rnf222        | 26 |
| NM_177240    | D030016E14Rik | 26 |
| NM_177243    | Slc26a9       | 26 |
| NM_177263    | Zhx3          | 26 |
| NM_177603    | Frat2         | 26 |
| NM_177632    | Fam43a        | 26 |
| NM_177746    | Awat2         | 26 |
| NM_177805    | Fam179b       | 26 |
| NM_177821    | Ep300         | 26 |
| NM_178404    | Zc3h6         | 26 |
| NM_178642    | Ano1          | 26 |
| NM_178661    | Creb312       | 26 |
| NM_181422    | Pkd211        | 26 |
| NM_182841    | Tmem150c      | 26 |
| NM_183288    | Arhgap27      | 26 |
| NM_198305    | Klh117        | 26 |
| NM_199302    | Lrsam1        | 26 |
| NR_002167    | E530001F21Rik | 26 |
| NR_003564    | Gm15698       | 26 |
| NR_028300    | 5330426P16Rik | 26 |
| NR_033145    | Dand5         | 26 |
| NR_033261    | Gm14492       | 26 |
| NR_033474    | 2810433D01Rik | 26 |
| NR_033493    | Gm10818       | 26 |
| NM_001001496 | Gja6          | 25 |
| NM_001002272 | Tro           | 25 |
| NM_001003917 | Atg9a         | 25 |
| NM_001004180 | BC057022      | 25 |
| NM_001005867 | Zmiz2         | 25 |
| NM_001008424 | Cdsn          | 25 |
| NM_001012311 | Pgbd1         | 25 |
| NM_001013026 | Ttf2          | 25 |
| NM_001024726 | Zfp607        | 25 |
| NM_001024846 | Zfp62         | 25 |

|              |               |    |
|--------------|---------------|----|
| NM_001033042 | Lrrc14b       | 25 |
| NM_001033484 | Iqgap3        | 25 |
| NM_001033492 | Mageb4        | 25 |
| NM_001033983 | 7420426K07Rik | 25 |
| NM_001034869 | Gm4981        | 25 |
| NM_001037727 | Arhgap25      | 25 |
| NM_001037928 | Gm11992       | 25 |
| NM_001038695 | Kdm3a         | 25 |
| NM_001039115 | Zkscan4       | 25 |
| NM_001039466 | Trim46        | 25 |
| NM_001039536 | Pigl          | 25 |
| NM_001048177 | Jak2          | 25 |
| NM_001077353 | Gsta3         | 25 |
| NM_001081209 | Prdm14        | 25 |
| NM_001081289 | 9030418K01Rik | 25 |
| NM_001081341 | Scaper        | 25 |
| NM_001081362 | Trrap         | 25 |
| NM_001081387 | Ctcf1         | 25 |
| NM_001081475 | Nasp          | 25 |
| NM_001081635 | Ccnd3         | 25 |
| NM_001097617 | C1s           | 25 |
| NM_001102563 | Prrt2         | 25 |
| NM_001110305 | Keap1         | 25 |
| NM_001110350 | Sin3a         | 25 |
| NM_001110824 | Foxp4         | 25 |
| NM_001111140 | Lrrc10b       | 25 |
| NM_001113399 | Zfp385b       | 25 |
| NM_001127233 | Trp53         | 25 |
| NM_001136079 | Ptger4        | 25 |
| NM_001142731 | Kctd1         | 25 |
| NM_001145096 | Hhla1         | 25 |
| NM_001145881 | Zfp212        | 25 |
| NM_001146048 | Lrrc1         | 25 |
| NM_001146120 | Psap          | 25 |
| NM_001146308 | Dbn1          | 25 |
| NM_001159536 | Adcy3         | 25 |
| NM_001160411 | Gstm4         | 25 |
| NM_001161515 | Dctd          | 25 |
| NM_001161823 | Kdm4a         | 25 |
| NM_001162989 | Phax          | 25 |
| NM_001163288 | Susd1         | 25 |
| NM_001163540 | Plec          | 25 |
| NM_001163609 | Psma8         | 25 |
| NM_001164177 | Psmd10        | 25 |
| NM_001164369 | Bcas1         | 25 |
| NM_001164686 | Tmem29        | 25 |
| NM_001166177 | Arsg          | 25 |
| NM_001166631 | Haver1        | 25 |
| NM_001168488 | Men1          | 25 |
| NM_001170975 | Dbn1          | 25 |
| NM_001172216 | D330028D13Rik | 25 |
| NM_001174169 | Adora3        | 25 |
| NM_001177751 | Tsc22d1       | 25 |
| NM_001190911 | Kirrel3       | 25 |

|              |            |    |
|--------------|------------|----|
| NM_001201470 | Papss2     | 25 |
| NM_007544    | Bid        | 25 |
| NM_007551    | Cxcr5      | 25 |
| NM_007658    | Cdc25a     | 25 |
| NM_007743    | Colla2     | 25 |
| NM_008058    | Fzd8       | 25 |
| NM_008135    | Slc6a9     | 25 |
| NM_008154    | Gpr3       | 25 |
| NM_008155    | Gpi1       | 25 |
| NM_008341    | Igfbp1     | 25 |
| NM_008430    | Kcnk1      | 25 |
| NM_008539    | Smad1      | 25 |
| NM_008618    | Mdh1       | 25 |
| NM_008640    | Laptm4a    | 25 |
| NM_008826    | Pfkl       | 25 |
| NM_008858    | Prkd1      | 25 |
| NM_008969    | Ptgs1      | 25 |
| NM_009090    | Polr2c     | 25 |
| NM_009100    | Rptn       | 25 |
| NM_009287    | Stim1      | 25 |
| NM_009364    | Tfpi2      | 25 |
| NM_009368    | Tgfb3      | 25 |
| NM_009403    | Tnfsf8     | 25 |
| NM_009460    | Sumo1      | 25 |
| NM_009744    | Bcl6       | 25 |
| NM_009759    | Bmx        | 25 |
| NM_009764    | Brcal      | 25 |
| NM_009932    | Col4a2     | 25 |
| NM_010067    | Trdmt1     | 25 |
| NM_010091    | Dvl1       | 25 |
| NM_010278    | Gfi1       | 25 |
| NM_010363    | Gstz1      | 25 |
| NM_010450    | Hoxa11     | 25 |
| NM_010496    | Id2        | 25 |
| NM_010552    | I117a      | 25 |
| NM_010574    | Irx2       | 25 |
| NM_010620    | Kif15      | 25 |
| NM_010732    | Lrrn2      | 25 |
| NM_010942    | Nsg1       | 25 |
| NM_010952    | Oaz2-ps    | 25 |
| NM_011284    | Rpa2       | 25 |
| NM_011399    | Slc25a17   | 25 |
| NM_011454    | Serpinb6b  | 25 |
| NM_011497    | Aurka      | 25 |
| NM_011680    | Usf2       | 25 |
| NM_012028    | St6galnac5 | 25 |
| NM_016671    | I127ra     | 25 |
| NM_016677    | Hpcal1     | 25 |
| NM_016779    | Dmp1       | 25 |
| NM_016978    | Oat        | 25 |
| NM_018752    | Trpm1      | 25 |
| NM_018790    | Arc        | 25 |
| NM_018884    | Pdzrn3     | 25 |
| NM_019454    | D114       | 25 |

|           |               |    |
|-----------|---------------|----|
| NM_019487 | Hebp2         | 25 |
| NM_019547 | Rbm38         | 25 |
| NM_019574 | Patz1         | 25 |
| NM_019575 | Scamp4        | 25 |
| NM_019626 | Cbln1         | 25 |
| NM_019647 | Rpl21         | 25 |
| NM_019729 | Usp8          | 25 |
| NM_019745 | Pdcd10        | 25 |
| NM_019759 | Dpt           | 25 |
| NM_019770 | Tmed2         | 25 |
| NM_020000 | Med8          | 25 |
| NM_020618 | Smarce1       | 25 |
| NM_020626 | Tmem27        | 25 |
| NM_021286 | Sez6          | 25 |
| NM_021305 | Sec61a2       | 25 |
| NM_021315 | Noc3l         | 25 |
| NM_021461 | Mknk1         | 25 |
| NM_021504 | Ngly1         | 25 |
| NM_021531 | Carm1         | 25 |
| NM_021546 | Necab3        | 25 |
| NM_021604 | Agrn          | 25 |
| NM_022424 | Fndc4         | 25 |
| NM_022984 | Retn          | 25 |
| NM_023284 | Nuf2          | 25 |
| NM_023538 | Agk           | 25 |
| NM_025413 | Lcelg         | 25 |
| NM_025444 | Taf13         | 25 |
| NM_025623 | Nipsnap3b     | 25 |
| NM_025667 | Tmem222       | 25 |
| NM_025819 | 1200016B10Rik | 25 |
| NM_025850 | Fank1         | 25 |
| NM_025853 | Dsn1          | 25 |
| NM_025927 | Mrpl45        | 25 |
| NM_025929 | 2010109I03Rik | 25 |
| NM_025962 | Mmachc        | 25 |
| NM_026039 | Med18         | 25 |
| NM_026247 | Alg13         | 25 |
| NM_026376 | Plxnd1        | 25 |
| NM_026392 | Tmem70        | 25 |
| NM_026520 | Fam122a       | 25 |
| NM_026574 | Ino80         | 25 |
| NM_026701 | Pb1d1         | 25 |
| NM_026929 | Chac1         | 25 |
| NM_026949 | Cnot8         | 25 |
| NM_027135 | Sec24d        | 25 |
| NM_027209 | Ms4a6b        | 25 |
| NM_027219 | Cdc42ep1      | 25 |
| NM_027266 | Rg9mtd3       | 25 |
| NM_027288 | Manba         | 25 |
| NM_027308 | 2210010C17Rik | 25 |
| NM_027654 | Pcgf6         | 25 |
| NM_027827 | Afmid         | 25 |
| NM_027875 | Syde1         | 25 |
| NM_027973 | Mlf1ip        | 25 |

|           |           |    |
|-----------|-----------|----|
| NM_028011 | Tom111    | 25 |
| NM_028135 | Tmem163   | 25 |
| NM_028315 | Dis3      | 25 |
| NM_028923 | Gle1      | 25 |
| NM_029938 | H2afv     | 25 |
| NM_030224 | Fndc8     | 25 |
| NM_030245 | Tada1     | 25 |
| NM_033327 | Zfp423    | 25 |
| NM_033521 | Laptm4b   | 25 |
| NM_033523 | Spred2    | 25 |
| NM_053180 | Cdk20     | 25 |
| NM_080462 | Hnmt      | 25 |
| NM_080556 | Tm9sf2    | 25 |
| NM_133191 | Eps812    | 25 |
| NM_133698 | Hrnr      | 25 |
| NM_134013 | Psme4     | 25 |
| NM_138665 | Sardh     | 25 |
| NM_139143 | Slc39a6   | 25 |
| NM_144881 | Hhat      | 25 |
| NM_145226 | Oas3      | 25 |
| NM_145363 | Tspan10   | 25 |
| NM_145375 | Tm6sf1    | 25 |
| NM_145493 | Cplx4     | 25 |
| NM_145547 | Zfp189    | 25 |
| NM_145561 | Tmprss11d | 25 |
| NM_145562 | Parm1     | 25 |
| NM_145568 | Krcc1     | 25 |
| NM_145618 | Narg2     | 25 |
| NM_145742 | Dhx35     | 25 |
| NM_145963 | Kcnj14    | 25 |
| NM_146008 | Tcp1112   | 25 |
| NM_146040 | Cdca71    | 25 |
| NM_147222 | Rdh19     | 25 |
| NM_153100 | Rtp3      | 25 |
| NM_153502 | Ankrd23   | 25 |
| NM_153749 | Mi111     | 25 |
| NM_170778 | Dpyd      | 25 |
| NM_172053 | Adamts16  | 25 |
| NM_172676 | Samd10    | 25 |
| NM_172829 | St6gal2   | 25 |
| NM_172857 | Exd1      | 25 |
| NM_172932 | Nlgn3     | 25 |
| NM_173376 | Rbmx2     | 25 |
| NM_173411 | BC030500  | 25 |
| NM_175391 | Apol7c    | 25 |
| NM_175450 | Wdr18     | 25 |
| NM_175483 | Snx33     | 25 |
| NM_177372 | Dna2      | 25 |
| NM_177585 | Iqcj      | 25 |
| NM_177677 | Dnajc5g   | 25 |
| NM_177726 | Tgm6      | 25 |
| NM_178149 | Pik3ip1   | 25 |
| NM_178644 | Oaf       | 25 |
| NM_181277 | Coll4a1   | 25 |

|              |               |    |
|--------------|---------------|----|
| NM_182840    | Emilin3       | 25 |
| NM_182993    | Slc17a7       | 25 |
| NM_183019    | Arhgef4       | 25 |
| NM_183199    | Usp44         | 25 |
| NM_198112    | Ostn          | 25 |
| NM_198927    | Smgc          | 25 |
| NM_199056    | Ippk          | 25 |
| NM_201600    | Myo5b         | 25 |
| NM_203320    | Cxcl3         | 25 |
| NR_002866    | Dio3os        | 25 |
| NR_015504    | 2410018L13Rik | 25 |
| NR_015591    | 5430405H02Rik | 25 |
| NR_024599    | Gm11346       | 25 |
| NR_026888    | 4930488L21Rik | 25 |
| NR_027505    | Rnf126        | 25 |
| NR_028419    | Tmem179b      | 25 |
| NR_033508    | Gm11110       | 25 |
| NR_037978    | E030025P04Rik | 25 |
| NM_001001130 | Zfp85-rs1     | 24 |
| NM_001002011 | Lmna          | 24 |
| NM_001003960 | Dnmt3b        | 24 |
| NM_001004155 | 9930012K11Rik | 24 |
| NM_001005420 | Gm347         | 24 |
| NM_001007268 | Dusp13        | 24 |
| NM_001008548 | Pde2a         | 24 |
| NM_001013816 | Gm5622        | 24 |
| NM_001024707 | Lrp3          | 24 |
| NM_001024851 | Ankrd34a      | 24 |
| NM_001025313 | Tapbp         | 24 |
| NM_001025617 | Cant1         | 24 |
| NM_001031811 | Kcnh8         | 24 |
| NM_001033040 | Gm166         | 24 |
| NM_001033122 | Cd69          | 24 |
| NM_001033261 | Zfc3h1        | 24 |
| NM_001033341 | Zfp407        | 24 |
| NM_001033428 | Tmem211       | 24 |
| NM_001034860 | Gm4858        | 24 |
| NM_001034880 | Gm5460        | 24 |
| NM_001034893 | Zfp936        | 24 |
| NM_001037166 | Gm4925        | 24 |
| NM_001037914 | Gm6320        | 24 |
| NM_001039038 | Nhlrc4        | 24 |
| NM_001040684 | Hsd3b7        | 24 |
| NM_001042541 | Akap1         | 24 |
| NM_001042623 | Phc1          | 24 |
| NM_001080127 | Rnps1         | 24 |
| NM_001080746 | Gtf2i         | 24 |
| NM_001080754 | Ambra1        | 24 |
| NM_001081098 | Zfp362        | 24 |
| NM_001081148 | Cyp2b23       | 24 |
| NM_001081222 | Escol         | 24 |
| NM_001081223 | Rbbp8         | 24 |
| NM_001081239 | Lilra5        | 24 |
| NM_001081368 | Tbcd1         | 24 |

|              |               |    |
|--------------|---------------|----|
| NM_001081381 | 2610002I17Rik | 24 |
| NM_001081454 | Furin         | 24 |
| NM_001083119 | Ptpru         | 24 |
| NM_001085412 | Gm13078       | 24 |
| NM_001085509 | Myom3         | 24 |
| NM_001098203 | Hic1          | 24 |
| NM_001098226 | Tead3         | 24 |
| NM_001099299 | Ajapl         | 24 |
| NM_001101472 | Serpina3j     | 24 |
| NM_001105196 | Tcfe3         | 24 |
| NM_001110146 | Prg4          | 24 |
| NM_001112701 | Cyth2         | 24 |
| NM_001113556 | A530064D06Rik | 24 |
| NM_001136074 | Nrl           | 24 |
| NM_001136236 | Fcrl1         | 24 |
| NM_001145799 | Ctla2a        | 24 |
| NM_001159393 | Irf1          | 24 |
| NM_001159527 | Wdr35         | 24 |
| NM_001162500 | Parvg         | 24 |
| NM_001163233 | Fancg         | 24 |
| NM_001164090 | Bcap29        | 24 |
| NM_001164223 | Rpa1          | 24 |
| NM_001164290 | Cuedc2        | 24 |
| NM_001164524 | Serpinb9c     | 24 |
| NM_001164640 | Apol7a        | 24 |
| NM_001164705 | Fam123a       | 24 |
| NM_001166009 | Tmem215       | 24 |
| NM_001167679 | Wdr67         | 24 |
| NM_001167748 | Egfem1        | 24 |
| NM_001168498 | A330049M08Rik | 24 |
| NM_001168515 | Rpgrip1       | 24 |
| NM_001170851 | Klra2         | 24 |
| NM_001176528 | Rara          | 24 |
| NM_001177412 | Usp35         | 24 |
| NM_001177513 | Gm7102        | 24 |
| NM_001193645 | Galns         | 24 |
| NM_001195083 | Phc2          | 24 |
| NM_001199060 | Wdr12         | 24 |
| NM_007473    | Aqp7          | 24 |
| NM_007593    | Cetn1         | 24 |
| NM_007887    | Dub1          | 24 |
| NM_007909    | Efna2         | 24 |
| NM_007949    | Ercc2         | 24 |
| NM_007952    | Pdia3         | 24 |
| NM_007996    | Fdx1          | 24 |
| NM_008108    | Gdf3          | 24 |
| NM_008153    | Cmklr1        | 24 |
| NM_008176    | Cxcl1         | 24 |
| NM_008318    | Ibsp          | 24 |
| NM_008410    | Itm2b         | 24 |
| NM_008451    | Klc2          | 24 |
| NM_008489    | Lbp           | 24 |
| NM_008524    | Lum           | 24 |
| NM_008553    | Ascl1         | 24 |

|           |           |    |
|-----------|-----------|----|
| NM_008821 | Pet2      | 24 |
| NM_008900 | Pou3f3    | 24 |
| NM_009012 | Rad50     | 24 |
| NM_009086 | Polr1b    | 24 |
| NM_009148 | Exoc4     | 24 |
| NM_009204 | Slc2a4    | 24 |
| NM_009252 | Serpina3n | 24 |
| NM_009423 | Traf4     | 24 |
| NM_009638 | Crisp1    | 24 |
| NM_009639 | Crisp3    | 24 |
| NM_009858 | Cd8b1     | 24 |
| NM_010258 | Gata6     | 24 |
| NM_010452 | Hoxa3     | 24 |
| NM_010478 | Hspalb    | 24 |
| NM_010565 | Inhbc     | 24 |
| NM_010786 | Mdm2      | 24 |
| NM_010850 | Mycs      | 24 |
| NM_011029 | Rpsa      | 24 |
| NM_011480 | Srebf1    | 24 |
| NM_011506 | Sucla2    | 24 |
| NM_011563 | Prdx2     | 24 |
| NM_011660 | Txn1      | 24 |
| NM_011863 | Papss1    | 24 |
| NM_011933 | Decr2     | 24 |
| NM_013557 | Eif2ak1   | 24 |
| NM_013599 | Mmp9      | 24 |
| NM_013773 | Tcl1b1    | 24 |
| NM_013847 | Gcat      | 24 |
| NM_013930 | Aass      | 24 |
| NM_015747 | Slc20a1   | 24 |
| NM_016661 | Ahcy      | 24 |
| NM_016748 | Ctps      | 24 |
| NM_016920 | Atp6v0a1  | 24 |
| NM_016957 | Hmgn2     | 24 |
| NM_017375 | Ostf1     | 24 |
| NM_017478 | Copg2     | 24 |
| NM_018867 | Cpxm2     | 24 |
| NM_018872 | Tmem131   | 24 |
| NM_019753 | Cdh17     | 24 |
| NM_019925 | Gpr132    | 24 |
| NM_020495 | Slco1b2   | 24 |
| NM_021319 | Pglyrp2   | 24 |
| NM_021347 | Gsdma     | 24 |
| NM_021367 | Tslp      | 24 |
| NM_021493 | Arhgap23  | 24 |
| NM_021608 | Dctn5     | 24 |
| NM_022410 | Myh9      | 24 |
| NM_022414 | Ngb       | 24 |
| NM_022889 | Pes1      | 24 |
| NM_022983 | Lpar3     | 24 |
| NM_022988 | Nif311    | 24 |
| NM_023196 | Pla2g12a  | 24 |
| NM_023363 | Zfp788    | 24 |
| NM_023396 | Rprm      | 24 |



|           |               |    |
|-----------|---------------|----|
| NM_023598 | Arid5b        | 24 |
| NM_023645 | Kdelc1        | 24 |
| NM_024434 | Lap3          | 24 |
| NM_024448 | Rab12         | 24 |
| NM_024474 | Emid2         | 24 |
| NM_024475 | Ublcp1        | 24 |
| NM_025494 | Atp6v1c1      | 24 |
| NM_025607 | Rnf181        | 24 |
| NM_025720 | Krtap3-2      | 24 |
| NM_025836 | Plin3         | 24 |
| NM_025870 | 2310047B19Rik | 24 |
| NM_026197 | Mettl16       | 24 |
| NM_026382 | Snrnp48       | 24 |
| NM_026416 | S100a16       | 24 |
| NM_026639 | Art4          | 24 |
| NM_026721 | Slc39a13      | 24 |
| NM_026931 | 1810011010Rik | 24 |
| NM_027485 | Med26         | 24 |
| NM_027551 | Klh130        | 24 |
| NM_027591 | Dmrtc1a       | 24 |
| NM_027616 | 4921528I01Rik | 24 |
| NM_028065 | Cnpy3         | 24 |
| NM_028071 | Cot11         | 24 |
| NM_028242 | Htatsf1       | 24 |
| NM_028261 | Tmem173       | 24 |
| NM_028464 | Mocs1         | 24 |
| NM_028595 | Ms4a6c        | 24 |
| NM_028751 | Tjap1         | 24 |
| NM_028775 | Cyp2s1        | 24 |
| NM_028811 | Elp3          | 24 |
| NM_029628 | Ppp1r3g       | 24 |
| NM_029759 | Fam54b        | 24 |
| NM_029840 | 2610029I01Rik | 24 |
| NM_029841 | 2510039018Rik | 24 |
| NM_029861 | Cnrip1        | 24 |
| NM_030176 | Spata2L       | 24 |
| NM_030261 | Sesn3         | 24 |
| NM_030262 | Pofut2        | 24 |
| NM_030740 | Vmn1r56       | 24 |
| NM_031869 | Prkab1        | 24 |
| NM_053102 |               | 24 |
| NM_080553 | Itpr3         | 24 |
| NM_080843 | Socs4         | 24 |
| NM_133984 | Hemk1         | 24 |
| NM_139303 | Kif18a        | 24 |
| NM_144873 | Uhrf2         | 24 |
| NM_144880 | Ppp2r5a       | 24 |
| NM_145540 | Ints3         | 24 |
| NM_145607 | Ttc13         | 24 |
| NM_145993 | L3mbt12       | 24 |
| NM_146045 | B4galt7       | 24 |
| NM_146101 | Habp2         | 24 |
| NM_146106 | Lyplal1       | 24 |
| NM_146140 | Traml11       | 24 |

15-Sep

|              |               |    |
|--------------|---------------|----|
| NM_147220    | Abca9         | 24 |
| NM_148946    | Slc8a2        | 24 |
| NM_152803    | Hpse          | 24 |
| NM_153068    | Ehd2          | 24 |
| NM_153121    | Lysmd1        | 24 |
| NM_153127    | Mmrn2         | 24 |
| NM_153159    | Zc3h12a       | 24 |
| NM_153163    | Cadps2        | 24 |
| NM_153565    | Pcsk9         | 24 |
| NM_172255    | Wdr11         | 24 |
| NM_172574    | Pqlc3         | 24 |
| NM_172708    | Dok7          | 24 |
| NM_172726    | E130309D02Rik | 24 |
| NM_172806    | Btbd7         | 24 |
| NM_172878    | Ttc34         | 24 |
| NM_173375    | Fam180a       | 24 |
| NM_175096    | Stbd1         | 24 |
| NM_175284    | Fzd10         | 24 |
| NM_175399    | Exosc4        | 24 |
| NM_175424    | Prr9          | 24 |
| NM_175482    | Usp28         | 24 |
| NM_175642    | Bai3          | 24 |
| NM_177727    | Lsm14b        | 24 |
| NM_177778    | Armc7         | 24 |
| NM_177785    | BC049635      | 24 |
| NM_177845    | Pla2g4e       | 24 |
| NM_178263    | Ankrd27       | 24 |
| NM_178386    | Slc25a31      | 24 |
| NM_178683    | Depdc1b       | 24 |
| NM_183137    | 2410002I01Rik | 24 |
| NM_198003    | Zfp946        | 24 |
| NM_199322    | Dot11         | 24 |
| NM_207533    | Dbx2          | 24 |
| NM_207583    | Fam5b         | 24 |
| NR_003372    | Gm7904        | 24 |
| NR_004857    | LOC100134990  | 24 |
| NR_015602    | F730043M19Rik | 24 |
| NR_027362    | A930003O13Rik | 24 |
| NR_027857    | Nkx6-2        | 24 |
| NR_033444    | Krt74         | 24 |
| NR_033607    | 4921533I20Rik | 24 |
| NM_001005424 | Gm996         | 23 |
| NM_001007472 | Noto          | 23 |
| NM_001007581 | 2810408M09Rik | 23 |
| NM_001013378 | Usp11         | 23 |
| NM_001024602 | AW555464      | 23 |
| NM_001024672 | AB099516      | 23 |
| NM_001025244 | Krtap31-2     | 23 |
| NM_001025573 | 2010107G12Rik | 23 |
| NM_001029893 | Psg26         | 23 |
| NM_001032378 | Pecam1        | 23 |
| NM_001032727 | Sybu          | 23 |
| NM_001033136 | Fam82a2       | 23 |
| NM_001033164 | 2510002D24Rik | 23 |

|              |                |    |
|--------------|----------------|----|
| NM_001033776 | Vrtn           | 23 |
| NM_001034891 | 2210404J11Rik  | 23 |
| NM_001039129 | Hnrnpal        | 23 |
| NM_001039162 | Clip2          | 23 |
| NM_001039566 | Defb30         | 23 |
| NM_001040136 | Pdzd9          | 23 |
| NM_001048060 | 5133401N09Rik  | 23 |
| NM_001048168 | Nfyc           | 23 |
| NM_001080935 | B230217C12Rik  | 23 |
| NM_001081035 | Nav3           | 23 |
| NM_001081094 | Znhit6         | 23 |
| NM_001081648 | Gm15107        | 23 |
| NM_001085383 | Anxa9          | 23 |
| NM_001085498 | Chmp6          | 23 |
| NM_001099319 | Gm12942        | 23 |
| NM_001101516 | Gpr25          | 23 |
| NM_001110192 | Inpp5d         | 23 |
| NM_001111119 | Ccnblip1       | 23 |
| NM_001112813 | Cacnalg        | 23 |
| NM_001113352 | Synj2          | 23 |
| NM_001113554 | Nudcd1         | 23 |
| NM_001114088 | Pdlim7         | 23 |
| NM_001114679 | 9930111J21Rik1 | 23 |
| NM_001122754 | Txk            | 23 |
| NM_001122954 | Pla2g5         | 23 |
| NM_001123370 | 9030025P20Rik  | 23 |
| NM_001130513 | Ace2           | 23 |
| NM_001136496 | Zfp935         | 23 |
| NM_001142950 | Nars           | 23 |
| NM_001146342 | Rnls           | 23 |
| NM_001159424 | I112a          | 23 |
| NM_001161769 | Lmo4           | 23 |
| NM_001161825 | Pex7           | 23 |
| NM_001162863 | Rnase10        | 23 |
| NM_001163316 | Get4           | 23 |
| NM_001163489 | Sema4a         | 23 |
| NM_001163641 | Setdb1         | 23 |
| NM_001164147 | Tcf3           | 23 |
| NM_001164202 | Gm8369         | 23 |
| NM_001164789 | Eomes          | 23 |
| NM_001164793 | Grin1a         | 23 |
| NM_001164801 | Slc38a10       | 23 |
| NM_001170395 | Cd163          | 23 |
| NM_001172091 | 1700001C19Rik  | 23 |
| NM_001177504 | Gm6588         | 23 |
| NM_001177538 | Gm10394        | 23 |
| NM_001177539 | Gm10391        | 23 |
| NM_001177576 | Slc25a22       | 23 |
| NM_001177586 | Esp31          | 23 |
| NM_001195084 | Plscr2         | 23 |
| NM_001197082 | Rcc1           | 23 |
| NM_001198968 | Itsn2          | 23 |
| NM_001199123 | Spc25          | 23 |
| NM_001199146 | Gpsml          | 23 |

|              |            |    |
|--------------|------------|----|
| NM_001199274 | Mat2b      | 23 |
| NM_001205067 | Jkamp      | 23 |
| NM_001205312 | Tyk2       | 23 |
| NM_001205349 | Lipk       | 23 |
| NM_007413    | Adora2b    | 23 |
| NM_007440    | Alox12     | 23 |
| NM_007674    | Cdx4       | 23 |
| NM_007725    | Cnn2       | 23 |
| NM_007732    | Col17a1    | 23 |
| NM_007771    | Cry1       | 23 |
| NM_007791    | Csrp1      | 23 |
| NM_007854    | Slc29a2    | 23 |
| NM_008161    | Gpx3       | 23 |
| NM_008178    | Gsx1       | 23 |
| NM_008204    | H2-M2      | 23 |
| NM_008212    | Hadh       | 23 |
| NM_008239    | Foxq1      | 23 |
| NM_008289    | Hsd11b2    | 23 |
| NM_008366    | I12        | 23 |
| NM_008452    | Klf2       | 23 |
| NM_008532    | Epcam      | 23 |
| NM_008536    | Tm4sf1     | 23 |
| NM_008561    | Mc3r       | 23 |
| NM_008698    | Nipsnap1   | 23 |
| NM_008777    | Pah        | 23 |
| NM_008831    | Phb        | 23 |
| NM_008972    | Ptma       | 23 |
| NM_009097    | Rps6ka1    | 23 |
| NM_009180    | St6galnac2 | 23 |
| NM_009238    | Sox4       | 23 |
| NM_009284    | Stat6      | 23 |
| NM_009324    | Tbx2       | 23 |
| NM_009717    | Neurod6    | 23 |
| NM_009743    | Bcl2l1     | 23 |
| NM_009748    | Bet1       | 23 |
| NM_009801    | Car2       | 23 |
| NM_009918    | Cnga3      | 23 |
| NM_010204    | Fgf6       | 23 |
| NM_010214    | Fhl4       | 23 |
| NM_010358    | Gstm1      | 23 |
| NM_010419    | Hes5       | 23 |
| NM_010517    | Igfbp4     | 23 |
| NM_010548    | I110       | 23 |
| NM_010591    | Jun        | 23 |
| NM_010596    | Kcna7      | 23 |
| NM_010637    | Klf4       | 23 |
| NM_010713    | Lhx8       | 23 |
| NM_010729    | Lox11      | 23 |
| NM_010739    | Muc13      | 23 |
| NM_010746    | Ncr1       | 23 |
| NM_010764    | Man2b1     | 23 |
| NM_010945    | Nsmaf      | 23 |
| NM_011010    | Omp        | 23 |
| NM_011034    | Prdx1      | 23 |

|           |               |    |
|-----------|---------------|----|
| NM_011196 | Ptger3        | 23 |
| NM_011324 | Scnn1a        | 23 |
| NM_011607 | Tnc           | 23 |
| NM_011634 | Traip         | 23 |
| NM_011694 | Vdac1         | 23 |
| NM_011702 | Vip           | 23 |
| NM_011739 | Ywhaq         | 23 |
| NM_013462 | Adrb3         | 23 |
| NM_013542 | Gzmb          | 23 |
| NM_013738 | Plek2         | 23 |
| NM_013883 | Scmh1         | 23 |
| NM_013917 | Pttg1         | 23 |
| NM_015776 | Mfap5         | 23 |
| NM_016984 | Trpc4         | 23 |
| NM_017374 | Ppp2cb        | 23 |
| NM_018863 | Pdyn          | 23 |
| NM_018866 | Cxcl13        | 23 |
| NM_019429 | Prss16        | 23 |
| NM_019430 | Cacng3        | 23 |
| NM_019545 | Hao2          | 23 |
| NM_019634 | Tspan7        | 23 |
| NM_019635 | Stk3          | 23 |
| NM_021455 | Mlxipl        | 23 |
| NM_021717 | Nrip2         | 23 |
| NM_021793 | Tmem8         | 23 |
| NM_022022 | Ube4b         | 23 |
| NM_024194 | Lrrc40        | 23 |
| NM_024219 | Hsbp1         | 23 |
| NM_024261 | 1700052N19Rik | 23 |
| NM_024465 | Abhd12        | 23 |
| NM_025415 | Cks2          | 23 |
| NM_025450 | Mrps17        | 23 |
| NM_025563 | 2010012005Rik | 23 |
| NM_025637 | Rwdd3         | 23 |
| NM_025839 | Nudt16l1      | 23 |
| NM_026004 | Nt5c3         | 23 |
| NM_026242 | Mrfap1        | 23 |
| NM_026385 | P11p          | 23 |
| NM_026432 | Tmem66        | 23 |
| NM_026446 | Rgs19         | 23 |
| NM_026497 | Nudt12        | 23 |
| NM_026503 | 1110058L19Rik | 23 |
| NM_026602 | Bcas2         | 23 |
| NM_026758 | Mphosph6      | 23 |
| NM_027120 | Itgb1bp3      | 23 |
| NM_027677 | Gpr39         | 23 |
| NM_027678 | Zranb3        | 23 |
| NM_028121 | Adpgk         | 23 |
| NM_028195 | Cyth4         | 23 |
| NM_028421 | Zc3hav1       | 23 |
| NM_028658 | Klraql        | 23 |
| NM_028787 | Slc35f5       | 23 |
| NM_028835 | Atg7          | 23 |
| NM_029256 | Ccdc83        | 23 |

|           |               |    |
|-----------|---------------|----|
| NM_029564 | Tax1bp3       | 23 |
| NM_029649 | Tmem101       | 23 |
| NM_029780 | Raf1          | 23 |
| NM_029884 | Hgsnat        | 23 |
| NM_029886 | 9430038I01Rik | 23 |
| NM_029926 | Irak4         | 23 |
| NM_030057 | Trappc6b      | 23 |
| NM_031198 | Tcfec         | 23 |
| NM_031388 | Usp26         | 23 |
| NM_032400 | Sucnr1        | 23 |
| NM_053079 | Slc15a1       | 23 |
| NM_053257 | Rpl31         | 23 |
| NM_054063 | Psg28         | 23 |
| NM_079835 | Btnl2         | 23 |
| NM_080845 | Ftcd          | 23 |
| NM_133354 | Sumo2         | 23 |
| NM_133700 | Btbd10        | 23 |
| NM_133791 | Wwc2          | 23 |
| NM_133891 | Slc44a1       | 23 |
| NM_133950 | Kdelr1        | 23 |
| NM_133954 | AA960436      | 23 |
| NM_134020 | Tmed4         | 23 |
| NM_134079 | Adk           | 23 |
| NM_134122 | Nrm           | 23 |
| NM_144517 | Tbc1d19       | 23 |
| NM_144788 | Hectd1        | 23 |
| NM_144833 | Zfp410        | 23 |
| NM_145078 | 2610305D13Rik | 23 |
| NM_145134 | Spsb4         | 23 |
| NM_145478 | Pim3          | 23 |
| NM_145484 | Zfp758        | 23 |
| NM_145924 | Cenpi         | 23 |
| NM_146054 | Fermt2        | 23 |
| NM_146068 | 2310008H04Rik | 23 |
| NM_146082 | BC027072      | 23 |
| NM_146191 | Lrrk1         | 23 |
| NM_153129 | Pacs1         | 23 |
| NM_153168 | Lars2         | 23 |
| NM_153566 | Yrdc          | 23 |
| NM_170777 | Elof1         | 23 |
| NM_172015 | Iars          | 23 |
| NM_172428 | Ccdc134       | 23 |
| NM_172650 | Kctd3         | 23 |
| NM_172693 | Galnt12       | 23 |
| NM_172893 | Parp12        | 23 |
| NM_172905 | E030002003Rik | 23 |
| NM_173420 | D930020E02Rik | 23 |
| NM_173421 | BC030476      | 23 |
| NM_173733 | Suox          | 23 |
| NM_174875 | Atg4a         | 23 |
| NM_175007 | Amph          | 23 |
| NM_175132 | Synpo21       | 23 |
| NM_175207 | Ankrd9        | 23 |
| NM_175224 | Metap1        | 23 |

|              |               |    |
|--------------|---------------|----|
| NM_175356    | Pi4kb         | 23 |
| NM_175644    | Gphb5         | 23 |
| NM_175936    | Vmn2r81       | 23 |
| NM_176860    | Ubash3b       | 23 |
| NM_176942    | Gabra5        | 23 |
| NM_176953    | Lig4          | 23 |
| NM_177052    | Kif6          | 23 |
| NM_177298    | Pisd          | 23 |
| NM_177637    | H2-M10.5      | 23 |
| NM_177781    | Trpal         | 23 |
| NM_178645    | Blmh          | 23 |
| NM_181404    | Kank1         | 23 |
| NM_182992    | Mypn          | 23 |
| NM_183358    | Gadd45gip1    | 23 |
| NM_198007    | Ascc3         | 23 |
| NM_198101    | Gmip          | 23 |
| NM_198292    | Tex2          | 23 |
| NM_198424    | Orai3         | 23 |
| NM_198651    | 4430402I18Rik | 23 |
| NM_198680    | Serpinb3b     | 23 |
| NM_199017    | 9230110C19Rik | 23 |
| NM_199252    | Unc93a        | 23 |
| NM_201607    | Pde4c         | 23 |
| NM_207203    | BC068157      | 23 |
| NR_002839    | Dlx6as        | 23 |
| NR_015476    | 1500011K16Rik | 23 |
| NR_028574    | Snhg8         | 23 |
| NR_033788    | 1700109G14Rik | 23 |
| NR_037963    | 2410004I01Rik | 23 |
| NR_037988    | LOC100503962  | 23 |
| NR_037995    | 0610009B14Rik | 23 |
| NM_001011732 | Xkr7          | 22 |
| NM_001011733 | O1fr288       | 22 |
| NM_001013374 | Lman2l        | 22 |
| NM_001013756 | Grhl3         | 22 |
| NM_001013804 | Flg2          | 22 |
| NM_001014397 | Gm13154       | 22 |
| NM_001018087 | Ldoc1         | 22 |
| NM_001024134 | Trim15        | 22 |
| NM_001024717 | Gal3st3       | 22 |
| NM_001025373 | Zfp943        | 22 |
| NM_001026211 | Dnajc19       | 22 |
| NM_001033155 | Dnajb14       | 22 |
| NM_001033157 | 5730507C01Rik | 22 |
| NM_001033196 | Znfx1         | 22 |
| NM_001033207 | Nlrc5         | 22 |
| NM_001033213 | Ttc7b         | 22 |
| NM_001033235 | Trim40        | 22 |
| NM_001033289 | Slc9a2        | 22 |
| NM_001033328 | BC023829      | 22 |
| NM_001033366 | Dpcri         | 22 |
| NM_001033437 | Gm889         | 22 |
| NM_001033767 | Gm4951        | 22 |
| NM_001037809 | Cdh3          | 22 |

|              |               |    |
|--------------|---------------|----|
| NM_001039373 | Mtcp1         | 22 |
| NM_001039669 | Iffol         | 22 |
| NM_001040403 | Flot2         | 22 |
| NM_001081082 | Alpi          | 22 |
| NM_001081115 | Nccrp1        | 22 |
| NM_001081411 | Sc1t1         | 22 |
| NM_001083937 | Slc35a2       | 22 |
| NM_001083959 | Spo11         | 22 |
| NM_001085418 | Pram15        | 22 |
| NM_001109045 | Aqp8          | 22 |
| NM_001110015 | Wdr36         | 22 |
| NM_001111062 | Comt          | 22 |
| NM_001111336 | Hsd3b4        | 22 |
| NM_001114400 | Gm15127       | 22 |
| NM_001122604 | Dazap1        | 22 |
| NM_001130169 | Zfp207        | 22 |
| NM_001135115 | Gm12250       | 22 |
| NM_001136077 | Enpp2         | 22 |
| NM_001142323 | Myo9b         | 22 |
| NM_001142943 | Zfp949        | 22 |
| NM_001142952 | Fam46c        | 22 |
| NM_001145885 | Ddx4          | 22 |
| NM_001145921 | Arhgef40      | 22 |
| NM_001145924 | 5730528L13Rik | 22 |
| NM_001159417 | Irf9          | 22 |
| NM_001159598 | Axin1         | 22 |
| NM_001159930 | Cenpl         | 22 |
| NM_001159940 | 2310007B03Rik | 22 |
| NM_001163136 | Macc1         | 22 |
| NM_001163590 | Stx11         | 22 |
| NM_001164284 | C87414        | 22 |
| NM_001164518 | Iglon5        | 22 |
| NM_001164563 | Amigo2        | 22 |
| NM_001167923 | Col6a5        | 22 |
| NM_001168248 | Rmi1          | 22 |
| NM_001171003 | Mgam          | 22 |
| NM_001172095 | Kdm4c         | 22 |
| NM_001177594 | Slc24a6       | 22 |
| NM_001177750 | Gm10767       | 22 |
| NM_001177839 | Smox          | 22 |
| NM_001191008 | Sstr5         | 22 |
| NM_001195431 | Islr          | 22 |
| NM_001199321 | Zfp94         | 22 |
| NM_001205052 | Jdp2          | 22 |
| NM_007419    | Adrb1         | 22 |
| NM_007421    | Adssl1        | 22 |
| NM_007502    | Atp1b3        | 22 |
| NM_007707    | Socs3         | 22 |
| NM_007884    | Epyc          | 22 |
| NM_007892    | E2f5          | 22 |
| NM_008003    | Fgf15         | 22 |
| NM_008129    | Gclm          | 22 |
| NM_008152    | Gpr65         | 22 |
| NM_008187    | Gt13          | 22 |



|           |          |    |
|-----------|----------|----|
| NM_008242 | Foxd1    | 22 |
| NM_008265 | Hoxa4    | 22 |
| NM_008671 | Nap112   | 22 |
| NM_008751 | Nxph1    | 22 |
| NM_008878 | Serpinf2 | 22 |
| NM_008928 | Map2k3   | 22 |
| NM_008984 | Ptpm     | 22 |
| NM_008990 | Pvr12    | 22 |
| NM_009075 | Rpia     | 22 |
| NM_009104 | Rrm2     | 22 |
| NM_009281 | Zfp143   | 22 |
| NM_009337 | Tcl1     | 22 |
| NM_009352 | Terf1    | 22 |
| NM_009398 | Tnfaip6  | 22 |
| NM_009455 | Ube2e1   | 22 |
| NM_009518 | Wnt10a   | 22 |
| NM_009542 | Zfp101   | 22 |
| NM_009672 | Anp32a   | 22 |
| NM_009690 | Cd51     | 22 |
| NM_009718 | Neurog2  | 22 |
| NM_009844 | Cd19     | 22 |
| NM_010043 | Des      | 22 |
| NM_010218 | Fjx1     | 22 |
| NM_010380 | H2-D1    | 22 |
| NM_010411 | Hdac3    | 22 |
| NM_010459 | Hoxb4    | 22 |
| NM_010474 | Hs3st1   | 22 |
| NM_010531 | I118bp   | 22 |
| NM_010772 | Maz      | 22 |
| NM_011020 | Hspa41   | 22 |
| NM_011032 | P4hb     | 22 |
| NM_011220 | Pts      | 22 |
| NM_011426 | Siglec1  | 22 |
| NM_011562 | Tdgfl    | 22 |
| NM_011683 | Vmnlr51  | 22 |
| NM_011824 | Greml    | 22 |
| NM_011871 | Prkra    | 22 |
| NM_011914 | Whsc2    | 22 |
| NM_011917 | Xrn2     | 22 |
| NM_011919 | Ing1     | 22 |
| NM_011957 | Creb311  | 22 |
| NM_011998 | Chst4    | 22 |
| NM_012020 | Foxl2    | 22 |
| NM_012052 | Rps3     | 22 |
| NM_013490 | Chka     | 22 |
| NM_013517 | Fcer2a   | 22 |
| NM_013563 | I12rg    | 22 |
| NM_013594 | Mbd1     | 22 |
| NM_013614 | Odc1     | 22 |
| NM_013626 | Pam      | 22 |
| NM_013731 | Sgk2     | 22 |
| NM_013776 | Tcl1b5   | 22 |
| NM_013806 | Abcc2    | 22 |
| NM_016710 | Hmgn5    | 22 |

|           |               |    |
|-----------|---------------|----|
| NM_016852 | Wbp2          | 22 |
| NM_016881 | Pmm2          | 22 |
| NM_016893 | Fut8          | 22 |
| NM_016895 | Ak2           | 22 |
| NM_016965 | Nckap1        | 22 |
| NM_019397 | Egfl6         | 22 |
| NM_019712 | Rbx1          | 22 |
| NM_019786 | Tbk1          | 22 |
| NM_020590 | Gabarapl1     | 22 |
| NM_021539 | Wsb2          | 22 |
| NM_021895 | Actn4         | 22 |
| NM_022000 | Gnas          | 22 |
| NM_023380 | Samsn1        | 22 |
| NM_023733 | Crot          | 22 |
| NM_023774 | 4930550L24Rik | 22 |
| NM_023858 | Mtmr2         | 22 |
| NM_024413 | Plekhf1       | 22 |
| NM_024461 | 1810037I17Rik | 22 |
| NM_025409 | Ier3ipl       | 22 |
| NM_025710 | Uqcrfs1       | 22 |
| NM_025717 | Rbm4b         | 22 |
| NM_025770 | Atg10         | 22 |
| NM_025816 | Tax1bp1       | 22 |
| NM_026028 | Ccdc77        | 22 |
| NM_026373 | Cdk2ap2       | 22 |
| NM_026493 | Csppl         | 22 |
| NM_026507 | Zwilch        | 22 |
| NM_026513 | Pdf           | 22 |
| NM_026558 | Fam92a        | 22 |
| NM_026655 | 2310057M21Rik | 22 |
| NM_026998 | Snx6          | 22 |
| NM_027000 | Gtpbp4        | 22 |
| NM_027022 | Cmtm2a        | 22 |
| NM_027391 | Iyd           | 22 |
| NM_027928 | Chst13        | 22 |
| NM_028024 | Nkiras2       | 22 |
| NM_028101 | Jmjd8         | 22 |
| NM_028263 | Fgfbp3        | 22 |
| NM_028462 | Fezf1         | 22 |
| NM_028475 | Ubap21        | 22 |
| NM_028785 | Dock8         | 22 |
| NM_028805 | Katnb1        | 22 |
| NM_028809 | Arpc5l        | 22 |
| NM_028846 | Usp20         | 22 |
| NM_028872 | 5730559C18Rik | 22 |
| NM_028994 | Pck2          | 22 |
| NM_029101 | Rrp7a         | 22 |
| NM_029294 | Prps111       | 22 |
| NM_029529 | Slc35d3       | 22 |
| NM_029541 | Arxes1        | 22 |
| NM_029643 | Gpr172b       | 22 |
| NM_029842 | Jmjd5         | 22 |
| NM_029851 | Dync2h1       | 22 |
| NM_030109 | Sf3b2         | 22 |

|           |               |    |
|-----------|---------------|----|
| NM_030133 | Srbd1         | 22 |
| NM_030701 | Niacr1        | 22 |
| NM_030712 | Cxcr6         | 22 |
| NM_030718 | Abo           | 22 |
| NM_031378 | Gsdmc         | 22 |
| NM_053105 | Klh11         | 22 |
| NM_054044 | Gpr124        | 22 |
| NM_054048 | Rcor2         | 22 |
| NM_130859 | Card10        | 22 |
| NM_133757 | Pgs1          | 22 |
| NM_133764 | Atp6v0e2      | 22 |
| NM_133849 | Hrh3          | 22 |
| NM_133996 | Apon          | 22 |
| NM_134000 | Traf3ip2      | 22 |
| NM_134170 | Vmn1r32       | 22 |
| NM_138606 | Pim2          | 22 |
| NM_144798 | Slc30a6       | 22 |
| NM_144801 | Tmem143       | 22 |
| NM_144837 | BC018507      | 22 |
| NM_144841 | Otx2          | 22 |
| NM_144845 | Ugt3a2        | 22 |
| NM_144849 | Ankrd54       | 22 |
| NM_145077 | Ucn2          | 22 |
| NM_145371 | Eif2b1        | 22 |
| NM_145473 | Csdc2         | 22 |
| NM_145591 | Zfp958        | 22 |
| NM_145619 | Parp3         | 22 |
| NM_145856 | I117f         | 22 |
| NM_146087 | Csnk1a1       | 22 |
| NM_146236 | Tceal1        | 22 |
| NM_146255 | Slc1a7        | 22 |
| NM_153063 | Zfp472        | 22 |
| NM_153175 | Gimap6        | 22 |
| NM_153529 | Nrn1          | 22 |
| NM_153778 | Atoh8         | 22 |
| NM_153807 | Acsf2         | 22 |
| NM_172436 | Slc25a12      | 22 |
| NM_172448 | Rnf43         | 22 |
| NM_172598 | Wdhd1         | 22 |
| NM_172725 | C330006K01Rik | 22 |
| NM_172928 | Dclk3         | 22 |
| NM_173398 | Gpr171        | 22 |
| NM_173403 | Slc10a4       | 22 |
| NM_173405 | Amz1          | 22 |
| NM_175229 | Srrm2         | 22 |
| NM_175342 | Cphx          | 22 |
| NM_175423 | Orail         | 22 |
| NM_175451 | Ckap4         | 22 |
| NM_175472 | Zcche11       | 22 |
| NM_175543 | Rab11fip4     | 22 |
| NM_175552 | Wdr3          | 22 |
| NM_176829 | 4931440F15Rik | 22 |
| NM_176902 | Fam100b       | 22 |
| NM_177652 | Ryr3          | 22 |

|              |               |    |
|--------------|---------------|----|
| NM_177911    | Tgm4          | 22 |
| NM_178036    | Lcn10         | 22 |
| NM_178358    | Lhfp11        | 22 |
| NM_178725    | Lrrc4c        | 22 |
| NM_178738    | Prss35        | 22 |
| NM_178743    | Slc26a11      | 22 |
| NM_178767    | Agmo          | 22 |
| NM_181392    | Gtf2h5        | 22 |
| NM_198615    | Mex3d         | 22 |
| NM_198861    | BC046404      | 22 |
| NM_199449    | Zhx2          | 22 |
| NM_199465    | Nexn          | 22 |
| NM_201358    | Lyrn4         | 22 |
| NM_201529    | Lmo7          | 22 |
| NM_201610    | Neil2         | 22 |
| NM_201611    | H2-M10.6      | 22 |
| NM_203508    | Eddm3b        | 22 |
| NM_207530    | Osbp11a       | 22 |
| NM_207678    | Ccn12         | 22 |
| NM_213614    |               | 22 |
|              | 5-Sep         |    |
| NR_003247    | Ceacam-ps1    | 22 |
| NR_015503    | A330040F15Rik | 22 |
| NR_015511    | E030011005Rik | 22 |
| NR_015528    | BC029722      | 22 |
| NR_027924    | 2010204K13Rik | 22 |
| NR_029439    | 1700018A04Rik | 22 |
| NR_029444    | 4930579K19Rik | 22 |
| NR_029471    | Gm11968       | 22 |
| NR_033641    | 4933436C20Rik | 22 |
| NR_036459    | A730018C14Rik | 22 |
| NR_037972    | BB014433      | 22 |
| NM_001007589 | Akirin2       | 21 |
| NM_001007596 | Rtn1          | 21 |
| NM_001012704 | Wfdc13        | 21 |
| NM_001013779 | Aim2          | 21 |
| NM_001015507 | Vprbp         | 21 |
| NM_001024136 | Anks6         | 21 |
| NM_001024919 | Bod1          | 21 |
| NM_001025310 | St6galnac6    | 21 |
| NM_001033249 | Zfp583        | 21 |
| NM_001033408 | Rbm44         | 21 |
| NM_001033541 | Gm5127        | 21 |
| NM_001033573 | Zdhhc6        | 21 |
| NM_001033711 | Evi2a         | 21 |
| NM_001034013 | Accn1         | 21 |
| NM_001034881 | Gm5464        | 21 |
| NM_001042451 | Snea          | 21 |
| NM_001042565 | Wsb1          | 21 |
| NM_001042726 | Pcdh8         | 21 |
| NM_001044744 | Gcdh          | 21 |
| NM_001045528 | Fkbp15        | 21 |
| NM_001045553 | Zfp868        | 21 |
| NM_001081019 | Gm12657       | 21 |
| NM_001081027 | Kcnt2         | 21 |

|              |               |    |
|--------------|---------------|----|
| NM_001081087 | Kbtbd10       | 21 |
| NM_001081106 | Cyt11         | 21 |
| NM_001081156 | Trnp1         | 21 |
| NM_001081333 | Plekhg4       | 21 |
| NM_001081975 | Mfap1b        | 21 |
| NM_001082961 | Snrpn         | 21 |
| NM_001082966 | Gm15114       | 21 |
| NM_001099920 | Gm15093       | 21 |
| NM_001114595 | Ehbp111       | 21 |
| NM_001122734 | Gm15085       | 21 |
| NM_001122735 | Gm15091       | 21 |
| NM_001136055 | Cd82          | 21 |
| NM_001145926 | C530028021Rik | 21 |
| NM_001146287 | Cables1       | 21 |
| NM_001146349 | Rnf217        | 21 |
| NM_001146350 | Eng           | 21 |
| NM_001159289 | Bcl11a        | 21 |
| NM_001159602 | Tmem8c        | 21 |
| NM_001160112 | Foxg1         | 21 |
| NM_001161747 | Palm          | 21 |
| NM_001162913 | Susd2         | 21 |
| NM_001163064 | AU041133      | 21 |
| NM_001163776 | Tmprss3       | 21 |
| NM_001164739 | Fam47a-ps     | 21 |
| NM_001166658 | Cdr1          | 21 |
| NM_001167578 | Gm9880        | 21 |
| NM_001167587 | Gm5916        | 21 |
| NM_001167937 | D6Erttd527e   | 21 |
| NM_001168225 | Morf412       | 21 |
| NM_001168288 | Arhgap39      | 21 |
| NM_001168296 | Ephb1         | 21 |
| NM_001168620 | Enpp5         | 21 |
| NM_001168679 | Tspan8        | 21 |
| NM_001171007 | Nod1          | 21 |
| NM_001174170 | Serpinb2      | 21 |
| NM_001177587 | Esp36         | 21 |
| NM_001177772 | Slco1c1       | 21 |
| NM_001190156 | Snx7          | 21 |
| NM_001190978 | Kif17         | 21 |
| NM_001191023 | Dync1i1       | 21 |
| NM_001195435 | 1190003K10Rik | 21 |
| NM_001198987 | Gm15097       | 21 |
| NM_001198988 | Gm15080       | 21 |
| NM_001199227 | Osbp15        | 21 |
| NM_001199785 | Zfp839        | 21 |
| NM_001205057 | Gm14295       | 21 |
| NM_007408    | Plin2         | 21 |
| NM_007452    | Prdx3         | 21 |
| NM_007677    | Psg17         | 21 |
| NM_007684    | Cetn3         | 21 |
| NM_007984    | Fscn1         | 21 |
| NM_007987    | Fas           | 21 |
| NM_008011    | Fgfr4         | 21 |
| NM_008120    | Gja4          | 21 |

|           |           |    |
|-----------|-----------|----|
| NM_008186 | Gtf2h1    | 21 |
| NM_008228 | Hdac1     | 21 |
| NM_008238 | Foxn1     | 21 |
| NM_008245 | Hhex      | 21 |
| NM_008338 | Ifngr2    | 21 |
| NM_008409 | Itm2a     | 21 |
| NM_008476 | Krt6a     | 21 |
| NM_008565 | Mcm4      | 21 |
| NM_008610 | Mmp2      | 21 |
| NM_008690 | Nfkbie    | 21 |
| NM_008695 | Nid2      | 21 |
| NM_008842 | Pim1      | 21 |
| NM_008873 | Plau      | 21 |
| NM_009010 | Rad23a    | 21 |
| NM_009036 | Rbpjl     | 21 |
| NM_009055 | Rfx1      | 21 |
| NM_009140 | Cxcl2     | 21 |
| NM_009266 | Sephs2    | 21 |
| NM_009297 | Supt6h    | 21 |
| NM_009499 | Vasp      | 21 |
| NM_009818 | Ctnna1    | 21 |
| NM_009911 | Cxcr4     | 21 |
| NM_010011 | Cyp4a10   | 21 |
| NM_010019 | Dapk2     | 21 |
| NM_010150 | Nr2f6     | 21 |
| NM_010273 | Gdi1      | 21 |
| NM_010313 | Gnb5      | 21 |
| NM_010316 | Gng3      | 21 |
| NM_010338 | Gpr37     | 21 |
| NM_010344 | Gsr       | 21 |
| NM_010401 | Hal       | 21 |
| NM_010402 | Hand2     | 21 |
| NM_010451 | Hoxa2     | 21 |
| NM_010465 | Hoxc6     | 21 |
| NM_010657 | Hivep3    | 21 |
| NM_010822 | Mpg       | 21 |
| NM_011022 | Ott       | 21 |
| NM_011392 | Slc34a1   | 21 |
| NM_011456 | Serpinb9e | 21 |
| NM_011496 | Aurkb     | 21 |
| NM_011652 | Ttn       | 21 |
| NM_011727 | Xlr3c     | 21 |
| NM_012003 | Cops7a    | 21 |
| NM_012014 | Gprin1    | 21 |
| NM_012038 | Vsnl1     | 21 |
| NM_013718 | Trappc3   | 21 |
| NM_016666 | Aip       | 21 |
| NM_016795 | Srpk1     | 21 |
| NM_016924 | Rwdd2b    | 21 |
| NM_018742 | Bet1l     | 21 |
| NM_018794 | Atp6ap1   | 21 |
| NM_018796 | Eef1b2    | 21 |
| NM_019461 | Usp27x    | 21 |
| NM_019514 | Astn2     | 21 |

|           |               |    |
|-----------|---------------|----|
| NM_019578 | Extl1         | 21 |
| NM_019748 | Sae1          | 21 |
| NM_019777 | Ikbke         | 21 |
| NM_020579 | B4gal t3      | 21 |
| NM_021325 | Cd200r1       | 21 |
| NM_021416 | Fam184b       | 21 |
| NM_021462 | Mknk2         | 21 |
| NM_021512 | Nup160        | 21 |
| NM_021525 | Rc11          | 21 |
| NM_021600 | Chrnd         | 21 |
| NM_021714 | Wbp11         | 21 |
| NM_021720 | Donson        | 21 |
| NM_022722 | Dpys          | 21 |
| NM_023125 | Kng1          | 21 |
| NM_023153 | Cwc15         | 21 |
| NM_023290 | Mkrn2         | 21 |
| NM_023305 | Ubap1         | 21 |
| NM_023631 | Aox4          | 21 |
| NM_023644 | Mccc1         | 21 |
| NM_023821 | Cmya5         | 21 |
| NM_024209 | Ppp6c         | 21 |
| NM_024270 | Stard3n1      | 21 |
| NM_025341 | Abhd6         | 21 |
| NM_025480 | Tmem128       | 21 |
| NM_025689 | Ccdc51        | 21 |
| NM_025690 | Sltm          | 21 |
| NM_025834 | Proz          | 21 |
| NM_025888 | Kctd20        | 21 |
| NM_026071 | Slc25a19      | 21 |
| NM_026295 | Ctdpl         | 21 |
| NM_026423 | Mri1          | 21 |
| NM_026452 | Coq9          | 21 |
| NM_026456 | Tceb1         | 21 |
| NM_026572 | Gcsh          | 21 |
| NM_026737 | Phf5a         | 21 |
| NM_026873 | Ptcd2         | 21 |
| NM_026878 | Ras111b       | 21 |
| NM_027157 | Krtap1-5      | 21 |
| NM_027843 | Ar114         | 21 |
| NM_028060 | Slc35f2       | 21 |
| NM_028089 | Cyp2c55       | 21 |
| NM_028117 | Chst14        | 21 |
| NM_028152 | Mms19         | 21 |
| NM_028420 | Camk2n2       | 21 |
| NM_028534 | Smap1         | 21 |
| NM_028666 | Fam110a       | 21 |
| NM_028790 | Acot12        | 21 |
| NM_028859 | 1700106J16Rik | 21 |
| NM_028937 | Sohlh2        | 21 |
| NM_029102 | Glt8d2        | 21 |
| NM_029576 | Rab1b         | 21 |
| NM_029632 | Ppp1r11       | 21 |
| NM_030564 | Rnf34         | 21 |
| NM_030678 | Gys1          | 21 |

|           |               |    |
|-----------|---------------|----|
| NM_030716 | Kcnip2        | 21 |
| NM_033321 | P2rx5         | 21 |
| NM_080285 | Cttnbp2       | 21 |
| NM_080467 | Atp6v0a4      | 21 |
| NM_080468 | Rxfp2         | 21 |
| NM_080554 | Psmc5         | 21 |
| NM_130863 | Adrbk1        | 21 |
| NM_133199 | Scn4a         | 21 |
| NM_133350 | Mapre3        | 21 |
| NM_133655 | Cd81          | 21 |
| NM_133817 | Zfp451        | 21 |
| NM_134011 | Tbrg4         | 21 |
| NM_134097 | Topors        | 21 |
| NM_134123 | Scaf8         | 21 |
| NM_134142 | Tmem109       | 21 |
| NM_134150 | Otub1         | 21 |
| NM_134154 | Slc25a45      | 21 |
| NM_138310 | Apobr         | 21 |
| NM_138950 | Wdr81         | 21 |
| NM_144491 | Dph1          | 21 |
| NM_145222 | B3gnt7        | 21 |
| NM_145441 | Ubxn2a        | 21 |
| NM_145460 | Oxnad1        | 21 |
| NM_145494 | Me2           | 21 |
| NM_145538 | Tmem189       | 21 |
| NM_145558 | Hadhb         | 21 |
| NM_145979 | Chd4          | 21 |
| NM_146047 | Clptm11       | 21 |
| NM_146073 | Zdhhc14       | 21 |
| NM_146122 | Dennd1a       | 21 |
| NM_146173 | Tspan33       | 21 |
| NM_146257 | Slc29a4       | 21 |
| NM_153062 | Slc37a1       | 21 |
| NM_153111 | Fev           | 21 |
| NM_153144 | Ggnbp2        | 21 |
| NM_153171 | Rgs13         | 21 |
| NM_172281 | Rnf40         | 21 |
| NM_172417 | 2310042D19Rik | 21 |
| NM_172562 | Tada2a        | 21 |
| NM_172662 | Gtdc1         | 21 |
| NM_172710 | Sei113        | 21 |
| NM_172778 | Maob          | 21 |
| NM_172787 | L3mbt13       | 21 |
| NM_172892 | Slc13a4       | 21 |
| NM_172965 | Sap130        | 21 |
| NM_173416 | BC068281      | 21 |
| NM_174852 | Phf12         | 21 |
| NM_175309 | Upk3b         | 21 |
| NM_175503 | Aard          | 21 |
| NM_176828 | C030006K11Rik | 21 |
| NM_176849 | Argl1         | 21 |
| NM_177303 | Lrrn4         | 21 |
| NM_177307 | Cyp4f39       | 21 |
| NM_177624 | Sntn          | 21 |



|              |               |    |
|--------------|---------------|----|
| NM_177696    | Gdpd4         | 21 |
| NM_177823    | Ubash3a       | 21 |
| NM_178392    | Snapc1        | 21 |
| NM_178576    | Cpsf4         | 21 |
| NM_178598    | Tagln2        | 21 |
| NM_178680    | Unc45b        | 21 |
| NM_178724    | Harbil        | 21 |
| NM_178930    | Gbf1          | 21 |
| NM_181420    | Fn3krp        | 21 |
| NM_181444    | Gprc5a        | 21 |
| NM_181680    | Dsg1c         | 21 |
| NM_183221    | Fat4          | 21 |
| NM_183285    | Kctd2         | 21 |
| NM_198322    | Zfp273        | 21 |
| NM_199301    | Mtg1          | 21 |
| NM_199311    | Clec4a1       | 21 |
| NM_199448    | Fez2          | 21 |
| NR_004447    | Gm5523        | 21 |
| NR_015482    | LOC100043315  | 21 |
| NR_027872    | 4930515G01Rik | 21 |
| NR_027930    | 1110020A21Rik | 21 |
| NR_027974    | 3110070M22Rik | 21 |
| NR_029430    | Stmn1-rs1     | 21 |
| NR_030683    | Gm14207       | 21 |
| NR_033307    | 4930592I03Rik | 21 |
| NR_033507    | Olfr1077-ps1  | 21 |
| NR_033590    | Gm8096        | 21 |
| NR_036572    | Gm13253       | 21 |
| NR_038141    | 1700008K24Rik | 21 |
| NM_001003817 | Erbp2         | 20 |
| NM_001003953 | Kdm2b         | 20 |
| NM_001005223 | Znhit3        | 20 |
| NM_001007568 | Zfp251        | 20 |
| NM_001012401 | Hspb6         | 20 |
| NM_001013751 | Gm52          | 20 |
| NM_001013769 | Rs11          | 20 |
| NM_001024945 | Qsox1         | 20 |
| NM_001029868 | Pdzd4         | 20 |
| NM_001030307 | Dkc1          | 20 |
| NM_001033140 | Sdhaf1        | 20 |
| NM_001033163 | Ephx3         | 20 |
| NM_001033165 | Dnajc25       | 20 |
| NM_001033186 | Skap1         | 20 |
| NM_001033208 | Gcom1         | 20 |
| NM_001033431 | Nlrp12        | 20 |
| NM_001034900 | Zfp345        | 20 |
| NM_001034909 | Gm6034        | 20 |
| NM_001039386 | Nelf          | 20 |
| NM_001043317 | Cd22          | 20 |
| NM_001045514 | Akna          | 20 |
| NM_001045542 | Gm12253       | 20 |
| NM_001080971 | Tubb1         | 20 |
| NM_001081123 | Arhgap36      | 20 |
| NM_001081131 | Dhtkd1        | 20 |

|              |               |    |
|--------------|---------------|----|
| NM_001081643 | Xlr3b         | 20 |
| NM_001082536 | Mkl1          | 20 |
| NM_001099792 | Trmt61a       | 20 |
| NM_001100462 | Tmem221       | 20 |
| NM_001110162 | Cdca2         | 20 |
| NM_001110784 | Xlr3a         | 20 |
| NM_001111043 | Serpinh1      | 20 |
| NM_001113734 | Mageb16       | 20 |
| NM_001114119 | Qrich1        | 20 |
| NM_001114174 | Fam189a2      | 20 |
| NM_001115087 | Fancf         | 20 |
| NM_001122661 | Speer4e       | 20 |
| NM_001122829 | Upf1          | 20 |
| NM_001122998 | Tiam2         | 20 |
| NM_001126047 | Sema4c        | 20 |
| NM_001127169 | Tceal7        | 20 |
| NM_001145198 | 1500009L16Rik | 20 |
| NM_001145801 | Ctla2b        | 20 |
| NM_001145834 | Ralgds        | 20 |
| NM_001146174 | Rangap1       | 20 |
| NM_001146311 | Cln3          | 20 |
| NM_001159900 | Hopx          | 20 |
| NM_001160163 | Neu2          | 20 |
| NM_001161411 | Ttc15         | 20 |
| NM_001161832 | T2            | 20 |
| NM_001163138 | Card6         | 20 |
| NM_001163301 | Pxmp3         | 20 |
| NM_001163494 | 4921539E11Rik | 20 |
| NM_001163503 | 2010001E11Rik | 20 |
| NM_001163507 | Mmrn1         | 20 |
| NM_001163685 | Psg18         | 20 |
| NM_001164561 | Exosc1        | 20 |
| NM_001165253 | Ctage5        | 20 |
| NM_001168240 | Irak1bp1      | 20 |
| NM_001168292 | R3hdm2        | 20 |
| NM_001168386 | Ccdc125       | 20 |
| NM_001168506 | Zfp574        | 20 |
| NM_001168509 | Ffar2         | 20 |
| NM_001170884 | Trim43b       | 20 |
| NM_001174078 | Smarca4       | 20 |
| NM_001177621 | Slc5a6        | 20 |
| NM_001177796 | Afap112       | 20 |
| NM_001177887 | Igsf5         | 20 |
| NM_001195244 | 2900053A13Rik | 20 |
| NM_001199009 | Dcaf11        | 20 |
| NM_001205214 | Rxbp1         | 20 |
| NM_007403    | Adam8         | 20 |
| NM_007431    | Alpl          | 20 |
| NM_007435    | Abcd1         | 20 |
| NM_007465    | Birc2         | 20 |
| NM_007583    | Cacng2        | 20 |
| NM_007671    | Cdkn2c        | 20 |
| NM_007682    | Cenpb         | 20 |
| NM_007731    | Col13a1       | 20 |

|           |          |    |
|-----------|----------|----|
| NM_007786 | Csn3     | 20 |
| NM_007843 | Defb1    | 20 |
| NM_007865 | D111     | 20 |
| NM_007975 | F2r13    | 20 |
| NM_008109 | Gdf5     | 20 |
| NM_008169 | Grin1    | 20 |
| NM_008210 | H3f3a    | 20 |
| NM_008297 | Hsf2     | 20 |
| NM_008428 | Kcnj8    | 20 |
| NM_008435 | Kcns1    | 20 |
| NM_008446 | Kif4     | 20 |
| NM_008520 | Ltbp3    | 20 |
| NM_008566 | Mcm5     | 20 |
| NM_008771 | P2rx1    | 20 |
| NM_008798 | Pdcd1    | 20 |
| NM_008908 | Ppic     | 20 |
| NM_009060 | Rgn      | 20 |
| NM_009088 | Polr1a   | 20 |
| NM_009170 | Shh      | 20 |
| NM_009174 | Siah2    | 20 |
| NM_009344 | Phlda1   | 20 |
| NM_009347 | Tecta    | 20 |
| NM_009454 | Ube2e3   | 20 |
| NM_009489 | Vmn2r37  | 20 |
| NM_009641 | Angpt4   | 20 |
| NM_009787 | Pdia4    | 20 |
| NM_009791 | Aspm     | 20 |
| NM_009865 | Cdh10    | 20 |
| NM_009890 | Ch25h    | 20 |
| NM_010065 | Dnml     | 20 |
| NM_010171 | F3       | 20 |
| NM_010325 | Got2     | 20 |
| NM_010391 | H2-Q10   | 20 |
| NM_010435 | Hira     | 20 |
| NM_010462 | Hoxc10   | 20 |
| NM_010544 | Ihh      | 20 |
| NM_010686 | Laptm5   | 20 |
| NM_010807 | Marcks11 | 20 |
| NM_010827 | Msc      | 20 |
| NM_010889 | Neb      | 20 |
| NM_010902 | Nfe2l2   | 20 |
| NM_010907 | Nfkbia   | 20 |
| NM_010919 | Nkx2-2   | 20 |
| NM_010951 | Gpr143   | 20 |
| NM_011076 | Abcb1a   | 20 |
| NM_011122 | Plod1    | 20 |
| NM_011195 | Ptcra    | 20 |
| NM_011237 | Rad9     | 20 |
| NM_011503 | Stxbp2   | 20 |
| NM_011623 | Top2a    | 20 |
| NM_011842 | Mta2     | 20 |
| NM_011894 | Sh3bp5   | 20 |
| NM_012009 | Sh2d1b1  | 20 |
| NM_013775 | Tcl1b2   | 20 |

|           |               |    |
|-----------|---------------|----|
| NM_013846 | Ror2          | 20 |
| NM_015780 | Cfhr1         | 20 |
| NM_016697 | Gpc3          | 20 |
| NM_016782 | Cntnap1       | 20 |
| NM_016872 | Vamp5         | 20 |
| NM_016873 | Wisp2         | 20 |
| NM_017404 | Mrpl39        | 20 |
| NM_018769 | Dfna5         | 20 |
| NM_018775 | Tbc1d8        | 20 |
| NM_019392 | Tyro3         | 20 |
| NM_019657 | Hsd17b12      | 20 |
| NM_019713 | Rassf1        | 20 |
| NM_019773 | Rab9          | 20 |
| NM_019793 | Tspan3        | 20 |
| NM_019826 | Ivd           | 20 |
| NM_019872 | Dmrtb1        | 20 |
| NM_019920 | Lamtor3       | 20 |
| NM_019922 | Crtap         | 20 |
| NM_020050 | Tmem9b        | 20 |
| NM_020483 | Sap30bp       | 20 |
| NM_021279 | Wnt1          | 20 |
| NM_021316 | Cend1         | 20 |
| NM_021403 | Srrm3         | 20 |
| NM_021494 | Dennd5a       | 20 |
| NM_022004 | Fxyd6         | 20 |
| NM_022997 | Vps35         | 20 |
| NM_023508 | Pdc12         | 20 |
| NM_023737 | Ehhadh        | 20 |
| NM_024271 | 1700016D06Rik | 20 |
| NM_024438 | Dusp19        | 20 |
| NM_025323 | 0610009D07Rik | 20 |
| NM_025330 | Hsd17b14      | 20 |
| NM_025521 | 2310011J03Rik | 20 |
| NM_025692 | Uba5          | 20 |
| NM_025835 | Pccb          | 20 |
| NM_026010 | Lipt2         | 20 |
| NM_026023 | Nudcd2        | 20 |
| NM_026163 | Pkp2          | 20 |
| NM_026183 | Slc47a1       | 20 |
| NM_026192 | Calcoco1      | 20 |
| NM_026238 | Narfl         | 20 |
| NM_026241 | Ankrd39       | 20 |
| NM_026253 | Lrrc18        | 20 |
| NM_026277 | Nob1          | 20 |
| NM_026344 | Dph2          | 20 |
| NM_026443 | Mtfp1         | 20 |
| NM_026516 | Tmem178       | 20 |
| NM_026536 | Atp5s         | 20 |
| NM_026635 | Fam96a        | 20 |
| NM_026638 | Cdipt         | 20 |
| NM_026643 | Cep5711       | 20 |
| NM_026654 | Toe1          | 20 |
| NM_026693 | Gabarap12     | 20 |
| NM_026821 | D4Bwg0951e    | 20 |

|           |               |           |
|-----------|---------------|-----------|
| NM_026836 | Taf11         | 20        |
| NM_026872 | Ubap2         | 20        |
| NM_026934 | Zc3h15        | 20        |
| NM_026954 | Tusc1         | 20        |
| NM_026955 | 2200002K05Rik | 20        |
| NM_027102 | Esam          | 20        |
| NM_027154 | Tmbim1        | 20        |
| NM_027352 | Gorasp2       | 20        |
| NM_027559 | Wdr96         | 20        |
| NM_027560 | Arrdc2        | 20        |
| NM_027650 | Speer3        | 20        |
| NM_027669 |               | 12-Sep 20 |
| NM_028015 | Lass5         | 20        |
| NM_028029 | Dnmbp         | 20        |
| NM_028182 | Sh2d4a        | 20        |
| NM_028306 | Hspa12b       | 20        |
| NM_028388 | Ndufv2        | 20        |
| NM_028576 | 1700106N22Rik | 20        |
| NM_028754 | 0610037L13Rik | 20        |
| NM_028892 | Spag17        | 20        |
| NM_029499 | Ms4a4c        | 20        |
| NM_029554 | 0610040J01Rik | 20        |
| NM_029610 | Lyrml         | 20        |
| NM_029635 | Commd9        | 20        |
| NM_029711 | Arpc2         | 20        |
| NM_029823 | Arxes2        | 20        |
| NM_029863 | 9230110F15Rik | 20        |
| NM_030017 | Rdh12         | 20        |
| NM_030127 | Htra3         | 20        |
| NM_030256 | Bc191         | 20        |
| NM_030684 | Trim34a       | 20        |
| NM_031377 | Pram11        | 20        |
| NM_031379 | Tkt11         | 20        |
| NM_031382 | Tex16         | 20        |
| NM_032007 | Mmplb         | 20        |
| NM_033134 | Inpp5e        | 20        |
| NM_053190 | S1pr5         | 20        |
| NM_133214 | BC017612      | 20        |
| NM_133724 | Cno           | 20        |
| NM_133981 | Alg9          | 20        |
| NM_133994 | Gstt3         | 20        |
| NM_134022 | 6330403K07Rik | 20        |
| NM_134134 | Hmgxb3        | 20        |
| NM_134136 | Fbxo38        | 20        |
| NM_134199 | Vmn1r235      | 20        |
| NM_139236 | No16          | 20        |
| NM_139270 | Pth2r         | 20        |
| NM_144868 | Pcnx13        | 20        |
| NM_144919 | Hdac11        | 20        |
| NM_145361 | Btbd2         | 20        |
| NM_145374 | Mios          | 20        |
| NM_145590 | BC017158      | 20        |
| NM_145743 | Lac1          | 20        |
| NM_146055 | 2610301G19Rik | 20        |

|           |               |    |
|-----------|---------------|----|
| NM_146064 | Soat2         | 20 |
| NM_146108 | Hibch         | 20 |
| NM_146244 | Rps6kl1       | 20 |
| NM_146260 | Tmie          | 20 |
| NM_147098 | Olfr630       | 20 |
| NM_147155 | Tagap1        | 20 |
| NM_152802 | Defb12        | 20 |
| NM_153508 | Clstn3        | 20 |
| NM_153521 | Lrrc41        | 20 |
| NM_153538 | Zcchc6        | 20 |
| NM_153546 | Mboat1        | 20 |
| NM_172162 | Hinfp         | 20 |
| NM_172543 | Fam117a       | 20 |
| NM_172560 | Cntrob        | 20 |
| NM_172571 | Fbf1          | 20 |
| NM_172575 | Zfp277        | 20 |
| NM_172603 | Phf11         | 20 |
| NM_172609 | Tomm22        | 20 |
| NM_172639 | Dpcd          | 20 |
| NM_172816 | Slc30a8       | 20 |
| NM_175291 | Dock10        | 20 |
| NM_175364 | Lym2          | 20 |
| NM_176962 | Zfp944        | 20 |
| NM_177056 | Tmem198       | 20 |
| NM_177066 | Tnni3k        | 20 |
| NM_177873 | Hfml          | 20 |
| NM_177920 | Serpina7      | 20 |
| NM_177994 | C030046I01Rik | 20 |
| NM_178693 | Coq4          | 20 |
| NM_178761 | Zfp672        | 20 |
| NM_178879 | B3gnt9-ps     | 20 |
| NM_178898 | Zfp956        | 20 |
| NM_180958 | Ccdc79        | 20 |
| NM_181328 | Slc25a29      | 20 |
| NM_181409 | Mtmr11        | 20 |
| NM_181569 | Nprl3         | 20 |
| NM_181593 | Itpkc         | 20 |
| NM_181815 | 4930534B04Rik | 20 |
| NM_183106 | Ttc17         | 20 |
| NM_183286 | Dhrs13        | 20 |
| NM_183392 | Nup54         | 20 |
| NM_194345 | Fam160b2      | 20 |
| NM_197991 | 2310044H10Rik | 20 |
| NM_198031 | Tubgcp3       | 20 |
| NM_198037 | Cachd1        | 20 |
| NM_198612 | Gxylt2        | 20 |
| NM_201256 | Eif4ebp3      | 20 |
| NM_203319 | Dhx37         | 20 |
| NM_205769 | Crh           | 20 |
| NM_205844 | Gfral         | 20 |
| NM_213615 | A530032D15Rik | 20 |
| NR_002858 | Gm4956        | 20 |
| NR_015506 | 4833418N02Rik | 20 |
| NR_027897 | 0610012G03Rik | 20 |

|              |               |    |
|--------------|---------------|----|
| NR_033171    | 4930403L05Rik | 20 |
| NR_033451    | Klral3-ps     | 20 |
| NR_037666    | LOC100503704  | 20 |
| NR_037959    | 1600010M07Rik | 20 |
| NM_001002012 | Hspa2         | 19 |
| NM_001005525 | Rsrc2         | 19 |
| NM_001007567 | Slc7a6os      | 19 |
| NM_001008549 | Zfp658        | 19 |
| NM_001025610 | Ms4a7         | 19 |
| NM_001030014 | Mcat          | 19 |
| NM_001033150 | Plekhm2       | 19 |
| NM_001033171 | Klrg2         | 19 |
| NM_001033206 | Pwyp2b        | 19 |
| NM_001033335 | Serpina3f     | 19 |
| NM_001033349 | Gm410         | 19 |
| NM_001033424 | Fnd3c2        | 19 |
| NM_001033429 | Trim75        | 19 |
| NM_001034115 | Shank1        | 19 |
| NM_001035228 | St3gal5       | 19 |
| NM_001037707 | Zfp27         | 19 |
| NM_001037764 | Rail          | 19 |
| NM_001037909 | C130026I21Rik | 19 |
| NM_001039478 | 4933421E11Rik | 19 |
| NM_001039878 | Strn4         | 19 |
| NM_001040397 | Filip1l       | 19 |
| NM_001040399 | Larplb        | 19 |
| NM_001045482 | Rbak          | 19 |
| NM_001080967 | Tmsb15b2      | 19 |
| NM_001081001 | Brca2         | 19 |
| NM_001081023 | Cacnals       | 19 |
| NM_001081354 | Maml1d1       | 19 |
| NM_001081415 | Samd1         | 19 |
| NM_001081477 | Brwd3         | 19 |
| NM_001081655 | Dact3         | 19 |
| NM_001098222 | Bhlhb9        | 19 |
| NM_001102611 | Smyd4         | 19 |
| NM_001127189 | Gm13157       | 19 |
| NM_001139509 | Nr4a2         | 19 |
| NM_001159382 | Gjc1          | 19 |
| NM_001159578 | Lnx1          | 19 |
| NM_001159645 | Araf          | 19 |
| NM_001159730 | Pdc           | 19 |
| NM_001161428 | Unc93b1       | 19 |
| NM_001161535 | Islr2         | 19 |
| NM_001162946 | Pcx           | 19 |
| NM_001162980 | 1700024P16Rik | 19 |
| NM_001163161 | Clec4d        | 19 |
| NM_001163266 | Lsm10         | 19 |
| NM_001163504 | Nr1h4         | 19 |
| NM_001163621 | Apol6         | 19 |
| NM_001163755 | Skor1         | 19 |
| NM_001164082 | Polr3d        | 19 |
| NM_001164249 | Tpml          | 19 |
| NM_001164593 | Pdzrn4        | 19 |

|              |          |    |
|--------------|----------|----|
| NM_001164607 | Maf1     | 19 |
| NM_001164729 | Tomm6    | 19 |
| NM_001167680 | Rhbdf2   | 19 |
| NM_001168405 | Ankrd55  | 19 |
| NM_001168491 | Pdcd4    | 19 |
| NM_001177573 | BB287469 | 19 |
| NM_001177964 | Dcdc2c   | 19 |
| NM_001190376 | Camta2   | 19 |
| NM_001190491 | Dmpk     | 19 |
| NM_001195265 | Pdzd7    | 19 |
| NM_001199004 | Golga5   | 19 |
| NM_001199113 | Slc29a1  | 19 |
| NM_001204223 | Clec12b  | 19 |
| NM_001205030 | Gm11568  | 19 |
| NM_007464    | Birc3    | 19 |
| NM_007483    | Rhob     | 19 |
| NM_007589    | Calm2    | 19 |
| NM_007591    | Calr     | 19 |
| NM_007598    | Cap1     | 19 |
| NM_007668    | Cdk5     | 19 |
| NM_007672    | Cdr2     | 19 |
| NM_007676    | Psg16    | 19 |
| NM_007761    | Crcp     | 19 |
| NM_007856    | Dhcr7    | 19 |
| NM_007861    | Dld      | 19 |
| NM_007916    | Ddx19a   | 19 |
| NM_007918    | Eif4ebp1 | 19 |
| NM_007982    | Ptk2     | 19 |
| NM_008061    | G6pc     | 19 |
| NM_008138    | Gnai2    | 19 |
| NM_008358    | I115ra   | 19 |
| NM_008564    | Mcm2     | 19 |
| NM_008585    | Mep1a    | 19 |
| NM_008811    | Pdha2    | 19 |
| NM_008885    | Pmp22    | 19 |
| NM_009003    | Rab4a    | 19 |
| NM_009126    | Serpib3a | 19 |
| NM_009184    | Ptk6     | 19 |
| NM_009208    | Slc4a3   | 19 |
| NM_009226    | Snrpd1   | 19 |
| NM_009382    | Thy1     | 19 |
| NM_009470    | Umod     | 19 |
| NM_009713    | Arsa     | 19 |
| NM_009728    | Atp10a   | 19 |
| NM_009838    | Cct6a    | 19 |
| NM_009922    | Cnn1     | 19 |
| NM_009933    | Col6a1   | 19 |
| NM_010185    | Fcer1g   | 19 |
| NM_010241    | Aktip    | 19 |
| NM_010314    | Gngt1    | 19 |
| NM_010382    | H2-Eb1   | 19 |
| NM_010509    | Ifnar2   | 19 |
| NM_010672    | Krtap6-1 | 19 |
| NM_010744    | Tmed1    | 19 |



|           |               |    |
|-----------|---------------|----|
| NM_010756 | Mafg          | 19 |
| NM_010791 | Meox1         | 19 |
| NM_011119 | Pa2g4         | 19 |
| NM_011261 | Reln          | 19 |
| NM_011307 | Uimc1         | 19 |
| NM_011412 | Slit3         | 19 |
| NM_011469 | Sprr2b        | 19 |
| NM_011712 | Wbp5          | 19 |
| NM_011755 | Zfp35         | 19 |
| NM_011829 | Impdh1        | 19 |
| NM_011872 | Klk7          | 19 |
| NM_013509 | Eno2          | 19 |
| NM_013693 | Tnf           | 19 |
| NM_013871 | Mapk12        | 19 |
| NM_015799 | Trfr2         | 19 |
| NM_016806 | Hnrnpa2b1     | 19 |
| NM_016896 | Map3k14       | 19 |
| NM_017377 | B4gal2        | 19 |
| NM_018783 | Tfip11        | 19 |
| NM_019409 | Omg           | 19 |
| NM_019510 | Trpc3         | 19 |
| NM_019754 | Tagln3        | 19 |
| NM_019825 | Ncoa6         | 19 |
| NM_019868 | Hnrnph2       | 19 |
| NM_019875 | Abcb9         | 19 |
| NM_019956 | Krt71         | 19 |
| NM_019986 | Habp4         | 19 |
| NM_021274 | Cxcl10        | 19 |
| NM_021529 | Ppp2r3c       | 19 |
| NM_021884 | Tsg101        | 19 |
| NM_022311 | Tcte2         | 19 |
| NM_022885 | Slc30a5       | 19 |
| NM_022981 | Zfp110        | 19 |
| NM_023277 | Jam3          | 19 |
| NM_023907 | Foxi1         | 19 |
| NM_024174 | Mrps23        | 19 |
| NM_024185 | Fam188a       | 19 |
| NM_024236 | Qdpr          | 19 |
| NM_024263 | Mxra8         | 19 |
| NM_025443 | Pno1          | 19 |
| NM_025473 | Fam3a         | 19 |
| NM_025476 | Fam82b        | 19 |
| NM_025531 | Slmo2         | 19 |
| NM_025636 | Ntper         | 19 |
| NM_025677 | Tsen15        | 19 |
| NM_025873 | Trit1         | 19 |
| NM_025991 | Kbtbd4        | 19 |
| NM_026160 | Map11c3b      | 19 |
| NM_026509 | Murc          | 19 |
| NM_026511 | 2810002N01Rik | 19 |
| NM_026551 | Dcakd         | 19 |
| NM_026582 | Wls           | 19 |
| NM_026640 | Fam111a       | 19 |
| NM_026725 | Dusp23        | 19 |

|           |               |    |
|-----------|---------------|----|
| NM_026751 | Myadm12       | 19 |
| NM_026912 | Snx15         | 19 |
| NM_026968 | Manbal        | 19 |
| NM_027237 | 2010003K11Rik | 19 |
| NM_027290 | Mcm10         | 19 |
| NM_027374 | Ppil3         | 19 |
| NM_027389 | Gon4l         | 19 |
| NM_027711 | Iqgap2        | 19 |
| NM_027998 | Cldn23        | 19 |
| NM_028000 | Ppapdc1b      | 19 |
| NM_028012 | Xrcc4         | 19 |
| NM_028044 | Cnn3          | 19 |
| NM_028076 | Tmub2         | 19 |
| NM_028131 | Cenpn         | 19 |
| NM_028132 | Pgm2          | 19 |
| NM_028200 | 1300018I17Rik | 19 |
| NM_028521 | Phospho2      | 19 |
| NM_028584 | Marveld3      | 19 |
| NM_028615 | Dppa2         | 19 |
| NM_029219 | Rnf19b        | 19 |
| NM_029548 | Rph3a1        | 19 |
| NM_029569 | Asb5          | 19 |
| NM_029619 | Msrb2         | 19 |
| NM_029774 | Tt1111        | 19 |
| NM_029836 | Tspyl2        | 19 |
| NM_029868 | Gbbp111       | 19 |
| NM_030610 | Fgf20         | 19 |
| NM_031164 | F13b          | 19 |
| NM_033541 | Oas1c         | 19 |
| NM_053109 | Clec2d        | 19 |
| NM_053134 | Pcdhb9        | 19 |
| NM_053214 | Myo1f         | 19 |
| NM_080444 | Asb10         | 19 |
| NM_133345 | Ing4          | 19 |
| NM_133778 | Fam131a       | 19 |
| NM_134009 | Ncln          | 19 |
| NM_134077 | Rbm26         | 19 |
| NM_134080 | Flnb          | 19 |
| NM_138647 | Lass1         | 19 |
| NM_139147 | Rab40b        | 19 |
| NM_144520 | Sec1412       | 19 |
| NM_144818 | Ncaph         | 19 |
| NM_144899 | Adamts14      | 19 |
| NM_144907 | Sesn2         | 19 |
| NM_144913 | Mepce         | 19 |
| NM_145399 | Scgn          | 19 |
| NM_145419 | Hkdc1         | 19 |
| NM_145453 | Zcche9        | 19 |
| NM_145571 | Mobkl1b       | 19 |
| NM_145819 | Mzfl          | 19 |
| NM_145953 | Cth           | 19 |
| NM_146057 | Dap           | 19 |
| NM_146119 | Fam129b       | 19 |
| NM_146206 | Tpcn2         | 19 |

|           |               |    |
|-----------|---------------|----|
| NM_152229 | Nr2e1         | 19 |
| NM_153087 | Hrh4          | 19 |
| NM_153589 | Ano2          | 19 |
| NM_153796 | Peo1          | 19 |
| NM_172150 | Ift52         | 19 |
| NM_172310 | Tarsl2        | 19 |
| NM_172567 | Mettl2        | 19 |
| NM_172628 | Sh3tc2        | 19 |
| NM_172883 | Mfsd7a        | 19 |
| NM_172945 | Ankrd13b      | 19 |
| NM_173037 | Tmco7         | 19 |
| NM_173423 | Fem1c         | 19 |
| NM_175123 | 1110051M20Rik | 19 |
| NM_175137 | Vars2         | 19 |
| NM_175140 | Chst8         | 19 |
| NM_175235 | Celf6         | 19 |
| NM_175280 | 4930529M08Rik | 19 |
| NM_175383 | B3gnt1        | 19 |
| NM_175560 | Zfp747        | 19 |
| NM_175646 | Txn14b        | 19 |
| NM_176922 | Itgal1        | 19 |
| NM_176963 | Galm          | 19 |
| NM_177158 | Rin1          | 19 |
| NM_177392 | Tmem220       | 19 |
| NM_177706 | Gm4922        | 19 |
| NM_177787 | Slc15a5       | 19 |
| NM_177818 | Skint7        | 19 |
| NM_178029 | Setd1a        | 19 |
| NM_178086 | Fa2h          | 19 |
| NM_178385 | Tbcc          | 19 |
| NM_178734 | Zfp473        | 19 |
| NM_181589 | Ckap21        | 19 |
| NM_181728 | Art3          | 19 |
| NM_181850 | Grm3          | 19 |
| NM_183165 | Pyroxd1       | 19 |
| NM_183166 | Gm4884        | 19 |
| NM_183315 | Ctxn1         | 19 |
| NM_194064 | Nanos2        | 19 |
| NM_198012 | Trim68        | 19 |
| NM_198636 | Acss3         | 19 |
| NM_199034 | 4922502D21Rik | 19 |
| NM_199059 | Tbpl2         | 19 |
| NM_201609 | Zfp652        | 19 |
| NM_203492 | Mrgprg        | 19 |
| NM_207000 | H2afy2        | 19 |
| NM_207267 | Tmsb15l       | 19 |
| NM_212485 | Krt73         | 19 |
| NR_004442 | LOC100042049  | 19 |
| NR_015541 | 1700066022Rik | 19 |
| NR_027848 | 4930479M11Rik | 19 |
| NR_028355 | Sra1          | 19 |
| NR_029438 | 4933406I18Rik | 19 |
| NR_033209 | Gm4792        | 19 |
| NR_033482 | Gm6938        | 19 |

|              |                    |    |
|--------------|--------------------|----|
| NR_033538    | Gm10421            | 19 |
| NR_033776    | AA545190           | 19 |
| NR_037980    | LOC100047133       | 19 |
| NR_038017    | LOC100504069       | 19 |
| NM_001001492 | Lca5l              | 18 |
| NM_001001981 | Utp14b             | 18 |
| NM_001004140 | Ckap2              | 18 |
| NM_001009948 | Nrsn2              | 18 |
| NM_001013365 | Osm                | 18 |
| NM_001013375 | Utp18              | 18 |
| NM_001013608 | 0610007P08Rik      | 18 |
| NM_001013765 | Zscan4c            | 18 |
| NM_001024230 | Gm5431             | 18 |
| NM_001024709 | Krtap10-10         | 18 |
| NM_001029837 | Pik3cd             | 18 |
| NM_001033142 | Rnf166             | 18 |
| NM_001033342 | Cdc42bpg           | 18 |
| NM_001033359 | Cntn5              | 18 |
| NM_001033819 | 9130409I23Rik      | 18 |
| NM_001037127 | Musk               | 18 |
| NM_001037493 | Slc41a3            | 18 |
| NM_001037926 | Gm13051            | 18 |
| NM_001039244 | Gm7120             | 18 |
| NM_001039647 | Gbp11              | 18 |
| NM_001040683 | Med15              | 18 |
| NM_001042779 | Sema3b             | 18 |
| NM_001045526 | A430084P05Rik      | 18 |
| NM_001077595 | Shroom3            | 18 |
| NM_001078646 | 4921515J06Rik      | 18 |
| NM_001080126 | Casp8              | 18 |
| NM_001081066 | Dennd3             | 18 |
| NM_001081090 | Esf1               | 18 |
| NM_001081141 | Gabbr2             | 18 |
| NM_001081201 | Dpy1914            | 18 |
| NM_001081667 | Klh134             | 18 |
| NM_001082960 | Itgam              | 18 |
| NM_001083317 | Slc35a4            | 18 |
| NM_001099634 | Myof               | 18 |
| NM_001100416 | OTTMUSG00000016609 | 18 |
| NM_001109761 | Capn3              | 18 |
| NM_001110145 | Ssb                | 18 |
| NM_001110147 | Tnk2               | 18 |
| NM_001114079 | Pabpc11            | 18 |
| NM_001114383 | Luzp4              | 18 |
| NM_001122978 | Casp8ap2           | 18 |
| NM_001126315 | Gm13109            | 18 |
| NM_001136076 | P4ha2              | 18 |
| NM_001136081 | Ssrp1              | 18 |
| NM_001136082 | Timeless           | 18 |
| NM_001143686 | Apoll1b            | 18 |
| NM_001144948 | Gm12886            | 18 |
| NM_001146001 | Pdzk1              | 18 |
| NM_001146153 | Homer3             | 18 |
| NM_001159743 | Fam150b            | 18 |

|              |               |    |
|--------------|---------------|----|
| NM_001161774 | St3gal3       | 18 |
| NM_001161790 | Mefv          | 18 |
| NM_001162425 | Efnal         | 18 |
| NM_001162983 | Lrrc38        | 18 |
| NM_001163026 | Dnajc13       | 18 |
| NM_001163175 | Begain        | 18 |
| NM_001163270 | Baiap3        | 18 |
| NM_001163473 | 1810010H24Rik | 18 |
| NM_001163833 | Msl1312       | 18 |
| NM_001164036 | Ly6e          | 18 |
| NM_001164366 | Atp13a2       | 18 |
| NM_001164828 | Astel         | 18 |
| NM_001168274 | Gsdmc2        | 18 |
| NM_001168276 | Zfp647        | 18 |
| NM_001168356 | Bnipl         | 18 |
| NM_001168577 | Nat2          | 18 |
| NM_001168693 | Endou         | 18 |
| NM_001172065 | Lrrc56        | 18 |
| NM_001173483 | Rlbp1         | 18 |
| NM_001177352 | Myc           | 18 |
| NM_001190373 | Kcng2         | 18 |
| NM_001190795 | Ddx55         | 18 |
| NM_001197028 | Vit           | 18 |
| NM_001198785 | Aatk          | 18 |
| NM_001198971 | BC049352      | 18 |
| NM_001199234 | Spnb4         | 18 |
| NM_001199270 | Aldoart1      | 18 |
| NM_001199275 | Tnipl         | 18 |
| NM_001204275 | Hdac7         | 18 |
| NM_001204914 | Reep2         | 18 |
| NM_001206661 | Tmem200c      | 18 |
| NM_007398    | Ada           | 18 |
| NM_007424    | Acan          | 18 |
| NM_007549    | Blk           | 18 |
| NM_007705    | Cirbp         | 18 |
| NM_007762    | Crhl1         | 18 |
| NM_007836    | Gadd45a       | 18 |
| NM_007972    | F10           | 18 |
| NM_008083    | Gap43         | 18 |
| NM_008124    | Gjb1          | 18 |
| NM_008136    | Gn11          | 18 |
| NM_008141    | Gnat2         | 18 |
| NM_008150    | Gpc4          | 18 |
| NM_008240    | Foxj1         | 18 |
| NM_008258    | Hn1           | 18 |
| NM_008672    | Nap114        | 18 |
| NM_008711    | Nog           | 18 |
| NM_008794    | Pcsk7         | 18 |
| NM_008887    | Phox2a        | 18 |
| NM_008952    | Pipox         | 18 |
| NM_009031    | Rbbp7         | 18 |
| NM_009045    | Rela          | 18 |
| NM_009123    | Nkx1-2        | 18 |
| NM_009304    | Syngn2        | 18 |

|           |           |    |
|-----------|-----------|----|
| NM_009357 | Tex261    | 18 |
| NM_009376 | Ift88     | 18 |
| NM_009474 | Uox       | 18 |
| NM_009506 | Vegfc     | 18 |
| NM_009525 | Wnt5b     | 18 |
| NM_009891 | Chat      | 18 |
| NM_009936 | Col9a3    | 18 |
| NM_009993 | Cyp1a2    | 18 |
| NM_010113 | Egf       | 18 |
| NM_010133 | En1       | 18 |
| NM_010139 | Epha2     | 18 |
| NM_010186 | Fcgr1     | 18 |
| NM_010212 | Fhl2      | 18 |
| NM_010260 | Gbp2      | 18 |
| NM_010322 | Gnpat     | 18 |
| NM_010442 | Hmox1     | 18 |
| NM_010811 | Ndst2     | 18 |
| NM_010896 | Neurogl   | 18 |
| NM_010925 | Rrp1      | 18 |
| NM_010950 | Numbl     | 18 |
| NM_010959 | Oit3      | 18 |
| NM_011040 | Pax8      | 18 |
| NM_011271 | Rnase1    | 18 |
| NM_011275 | Rnaseh1   | 18 |
| NM_011394 | Slc20a2   | 18 |
| NM_011397 | Slc23a1   | 18 |
| NM_011491 | Stc2      | 18 |
| NM_011504 | Stxbp3a   | 18 |
| NM_011856 | Odz2      | 18 |
| NM_013512 | Epb4.114a | 18 |
| NM_013630 | Pkd1      | 18 |
| NM_013661 | Sema5b    | 18 |
| NM_013673 | Sp100     | 18 |
| NM_013705 | Zfp30     | 18 |
| NM_015773 | Spag6     | 18 |
| NM_015817 | Ppap2c    | 18 |
| NM_016758 | Rgs14     | 18 |
| NM_016870 | Acsm3     | 18 |
| NM_016880 | Krt35     | 18 |
| NM_016919 | Col5a3    | 18 |
| NM_018789 | Foxo4     | 18 |
| NM_019402 | Pabpn1    | 18 |
| NM_019411 | Ppp2ca    | 18 |
| NM_019507 | Tbx21     | 18 |
| NM_019641 | Stmn1     | 18 |
| NM_019811 | Acss2     | 18 |
| NM_019821 | Gltp      | 18 |
| NM_019880 | Mtch1     | 18 |
| NM_020009 | Mtor      | 18 |
| NM_020271 | Pdpx      | 18 |
| NM_020559 | Alas1     | 18 |
| NM_020611 | Srd5a3    | 18 |
| NM_021022 | Abcb11    | 18 |
| NM_021328 | Bin3      | 18 |

|           |               |    |
|-----------|---------------|----|
| NM_021398 | Slc43a3       | 18 |
| NM_021446 | 0610007P14Rik | 18 |
| NM_021513 | Thap11        | 18 |
| NM_021557 | Rdh11         | 18 |
| NM_022029 | Nrgn          | 18 |
| NM_023040 | Gfer          | 18 |
| NM_023140 | Glr3          | 18 |
| NM_023158 | Cxcl16        | 18 |
| NM_023243 | Ccnh          | 18 |
| NM_023328 | Agtpbp1       | 18 |
| NM_023386 | Rtp4          | 18 |
| NM_023655 | Trim29        | 18 |
| NM_024196 | Tbcd20        | 18 |
| NM_024233 | Rexo2         | 18 |
| NM_024439 | H47           | 18 |
| NM_025272 | Atp6v0e       | 18 |
| NM_025403 | Nop10         | 18 |
| NM_025503 | 1700029P11Rik | 18 |
| NM_025514 | Anapc16       | 18 |
| NM_025557 | Pcp411        | 18 |
| NM_025896 | Prl3a1        | 18 |
| NM_025915 | Tmem88        | 18 |
| NM_025942 | Ola1          | 18 |
| NM_025982 | Tspan31       | 18 |
| NM_026080 | Mrps24        | 18 |
| NM_026386 | Snx2          | 18 |
| NM_026436 | Tmem86a       | 18 |
| NM_026439 | Ccdc80        | 18 |
| NM_026454 | Ube2f         | 18 |
| NM_026613 | Ccdc34        | 18 |
| NM_026622 | 3110057012Rik | 18 |
| NM_026798 | Tmem216       | 18 |
| NM_026834 | Krtap4-6      | 18 |
| NM_026850 | Pdc13         | 18 |
| NM_027203 | Leng1         | 18 |
| NM_027246 | Snrpf         | 18 |
| NM_027251 | 2010107G23Rik | 18 |
| NM_027464 | 5730469M10Rik | 18 |
| NM_027469 | Gfod2         | 18 |
| NM_027568 | Krtap31-1     | 18 |
| NM_027578 | Cd200r3       | 18 |
| NM_027687 | Cabyr         | 18 |
| NM_027869 | Pnpt1         | 18 |
| NM_027908 | Amdhd1        | 18 |
| NM_027975 | Fam83d        | 18 |
| NM_028009 | Rpusd1        | 18 |
| NM_028014 | 2310067B10Rik | 18 |
| NM_028042 | Ercc8         | 18 |
| NM_028057 | Cyb5r1        | 18 |
| NM_028072 | Sulf2         | 18 |
| NM_028197 | 2510003E04Rik | 18 |
| NM_028235 | Ttc30b        | 18 |
| NM_028308 | 2700078K21Rik | 18 |
| NM_028469 | 3110082I17Rik | 18 |

|           |               |    |
|-----------|---------------|----|
| NM_028478 | Rassf6        | 18 |
| NM_028637 | 1110034G24Rik | 18 |
| NM_028762 | Rbm19         | 18 |
| NM_029010 | Glb11         | 18 |
| NM_029011 | Pyroxd2       | 18 |
| NM_029083 | Ddit4         | 18 |
| NM_029098 | Lmbr11        | 18 |
| NM_029315 | Pou5f2        | 18 |
| NM_029394 | Snx24         | 18 |
| NM_029553 | Ttc8          | 18 |
| NM_029690 | Arpm1         | 18 |
| NM_029735 | Eprs          | 18 |
| NM_029771 | Gpr30         | 18 |
| NM_029816 | 2610028H24Rik | 18 |
| NM_030611 | Akr1c6        | 18 |
| NM_031877 | Wasf1         | 18 |
| NM_032005 | Tbx19         | 18 |
| NM_033077 | DlPas1        | 18 |
| NM_053008 | Olig3         | 18 |
| NM_053206 | Magee2        | 18 |
| NM_133800 | Nol12         | 18 |
| NM_133888 | Smpd13b       | 18 |
| NM_134130 | Abhd3         | 18 |
| NM_134148 | Carns1        | 18 |
| NM_144538 | Rab3i11       | 18 |
| NM_144815 | Cecr5         | 18 |
| NM_144819 | Ccdc92        | 18 |
| NM_144886 | Exosc2        | 18 |
| NM_144908 | Galnt11       | 18 |
| NM_144918 | Smyd5         | 18 |
| NM_145379 | Mrgprf        | 18 |
| NM_145496 | Dak           | 18 |
| NM_145630 | Pdk3          | 18 |
| NM_145968 | Tagap         | 18 |
| NM_146025 | Samd14        | 18 |
| NM_146033 | Ankmy2        | 18 |
| NM_146154 | Ppp1r8        | 18 |
| NM_146190 | Tubgcp5       | 18 |
| NM_146213 | Ces4a         | 18 |
| NM_146222 | BC024479      | 18 |
| NM_146250 | Gpr1          | 18 |
| NM_152804 | Plk2          | 18 |
| NM_153112 | Cadm4         | 18 |
| NM_153131 | Unc5a         | 18 |
| NM_153151 | Acat3         | 18 |
| NM_153161 | BC037034      | 18 |
| NM_153287 | Csrnp1        | 18 |
| NM_153507 | Cpne2         | 18 |
| NM_153553 | Npas4         | 18 |
| NM_172116 | Pddc1         | 18 |
| NM_172119 | Dio3          | 18 |
| NM_172283 | Fuk           | 18 |
| NM_172291 | Foxred1       | 18 |
| NM_172410 | Nup93         | 18 |



|              |               |    |
|--------------|---------------|----|
| NM_172578    | Misl8bp1      | 18 |
| NM_172791    | Pla2g3        | 18 |
| NM_172807    | Ppwd1         | 18 |
| NM_172919    | Zfp846        | 18 |
| NM_173377    | Svs3b         | 18 |
| NM_173392    | Zfyve16       | 18 |
| NM_173419    | Dleu7         | 18 |
| NM_173770    | Fam69c        | 18 |
| NM_175028    | Adnp2         | 18 |
| NM_175086    | Agtr1b        | 18 |
| NM_175087    | Aqp6          | 18 |
| NM_175094    | Pdhx          | 18 |
| NM_175249    | Psap11        | 18 |
| NM_175325    | Bbs4          | 18 |
| NM_175332    | E130012A19Rik | 18 |
| NM_175430    | Ccdc40        | 18 |
| NM_175522    | Elfn1         | 18 |
| NM_175668    | Gpr4          | 18 |
| NM_176987    | 4732471D19Rik | 18 |
| NM_177000    | C130050018Rik | 18 |
| NM_177038    | Trappc8       | 18 |
| NM_177187    | D5Ert577e     | 18 |
| NM_177346    | Gpr149        | 18 |
| NM_177355    | Plcx3         | 18 |
| NM_177450    | Cndp1         | 18 |
| NM_177596    | Zfp947        | 18 |
| NM_177604    | AA986860      | 18 |
| NM_178066    | 1110012D08Rik | 18 |
| NM_183389    | Duxbl         | 18 |
| NM_198108    | Morn4         | 18 |
| NM_199199    | Tmem199       | 18 |
| NM_199468    | Zcchc5        | 18 |
| NM_201352    | Gdpd5         | 18 |
| NM_201371    | Prmt8         | 18 |
| NM_206537    | Cyp2c54       | 18 |
| NM_207161    | BC048355      | 18 |
| NM_207215    | Mycbp2        | 18 |
| NM_207234    | Rexo4         | 18 |
| NM_207260    | Ankrd34c      | 18 |
| NM_207268    | Ccdc87        | 18 |
| NR_003270    | Snhg3         | 18 |
| NR_003635    | 4933400A11Rik | 18 |
| NR_027825    | 4930470P17Rik | 18 |
| NR_027895    | A930005H10Rik | 18 |
| NR_027970    | 0610008F07Rik | 18 |
| NR_028304    | C4bp-ps1      | 18 |
| NR_033445    | 4931428L18Rik | 18 |
| NR_033521    | Tpsab1        | 18 |
| NR_033583    | Spn-ps        | 18 |
| NM_001002005 | Panx2         | 17 |
| NM_001004154 | Rragb         | 17 |
| NM_001004185 | Whamm         | 17 |
| NM_001005477 | Barh12        | 17 |
| NM_001008973 | Tmem232       | 17 |

|              |               |    |
|--------------|---------------|----|
| NM_001012723 | Wfdc16        | 17 |
| NM_001012765 | Adcy5         | 17 |
| NM_001013012 | Zfp787        | 17 |
| NM_001018002 | Dppa4         | 17 |
| NM_001024616 | B230208H17Rik | 17 |
| NM_001024721 | BC094916      | 17 |
| NM_001033201 | Ncbp1         | 17 |
| NM_001033225 | Pnrcl         | 17 |
| NM_001033234 | Gm9           | 17 |
| NM_001033340 | Lrrc30        | 17 |
| NM_001033344 | Dusp27        | 17 |
| NM_001033365 | Gm628         | 17 |
| NM_001033444 | Capn13        | 17 |
| NM_001033791 | Gm12888       | 17 |
| NM_001034097 | BC096441      | 17 |
| NM_001034878 | Dnaic2        | 17 |
| NM_001039560 | Gcnt7         | 17 |
| NM_001040111 | Arap1         | 17 |
| NM_001077636 | Pigw          | 17 |
| NM_001081091 | Cep152        | 17 |
| NM_001081187 | Htra4         | 17 |
| NM_001081194 | Kcnh4         | 17 |
| NM_001081270 | Dscaml1       | 17 |
| NM_001081274 | Pgd           | 17 |
| NM_001081286 | Fat1          | 17 |
| NM_001081306 | Ptprz1        | 17 |
| NM_001081327 | Hs3st2        | 17 |
| NM_001081331 | D7Erttd443e   | 17 |
| NM_001081351 | A430107013Rik | 17 |
| NM_001083925 | Oasl1b        | 17 |
| NM_001085472 | Acin1         | 17 |
| NM_001101443 | Prvt4         | 17 |
| NM_001101467 | Cyp2a22       | 17 |
| NM_001109752 | Dlg4          | 17 |
| NM_001112711 | Grk6          | 17 |
| NM_001113238 | Fcrl5         | 17 |
| NM_001114084 | Dgat216       | 17 |
| NM_001130419 | Hpca          | 17 |
| NM_001130525 | Lzts2         | 17 |
| NM_001142410 | Gm14124       | 17 |
| NM_001145390 | Gm766         | 17 |
| NM_001145948 | Ttc39a        | 17 |
| NM_001145959 | Ndrp2         | 17 |
| NM_001146318 | Cnp           | 17 |
| NM_001159505 | Tnfrsf13      | 17 |
| NM_001159529 | Cox7a21       | 17 |
| NM_001159649 | Lax1          | 17 |
| NM_001159706 | Folh1         | 17 |
| NM_001159902 | Klrb1a        | 17 |
| NM_001160406 | Gfilb         | 17 |
| NM_001162922 | Zfp931        | 17 |
| NM_001163028 | Bcmol         | 17 |
| NM_001163126 | Cog5          | 17 |
| NM_001163481 | Fkbp10        | 17 |

|              |           |    |
|--------------|-----------|----|
| NM_001163611 | Nps       | 17 |
| NM_001163733 | Ush1c     | 17 |
| NM_001164074 | Tgif1     | 17 |
| NM_001164709 | Syvn1     | 17 |
| NM_001166406 | Kif20a    | 17 |
| NM_001166640 | Csrp2bp   | 17 |
| NM_001168290 | Sugp2     | 17 |
| NM_001168602 | Smok3a    | 17 |
| NM_001169153 | Cd3001f   | 17 |
| NM_001170430 | Slc35b3   | 17 |
| NM_001170638 | Slc17a1   | 17 |
| NM_001177484 | Gm11559   | 17 |
| NM_001198794 | AB124611  | 17 |
| NM_001198911 | Arhgef2   | 17 |
| NM_001199271 | Slc19a1   | 17 |
| NM_001199677 | Vps37d    | 17 |
| NM_001204427 | Sprr3     | 17 |
| NM_001206335 | Itfg3     | 17 |
| NM_007393    | Actb      | 17 |
| NM_007634    | Ccnf      | 17 |
| NM_007783    | Csk       | 17 |
| NM_007888    | Dvl2      | 17 |
| NM_007925    | Eln       | 17 |
| NM_007976    | F5        | 17 |
| NM_008030    | Fmo3      | 17 |
| NM_008066    | Gabra2    | 17 |
| NM_008075    | Gabrr1    | 17 |
| NM_008207    | H2-T24    | 17 |
| NM_008269    | Hoxb6     | 17 |
| NM_008522    | Ltf       | 17 |
| NM_008638    | Mthfd2    | 17 |
| NM_008815    | Etv4      | 17 |
| NM_008828    | Pgk1      | 17 |
| NM_008886    | Pms2      | 17 |
| NM_008970    | Pthlh     | 17 |
| NM_008987    | Ptx3      | 17 |
| NM_009105    | Rsu1      | 17 |
| NM_009129    | Scg2      | 17 |
| NM_009251    | Serpina3g | 17 |
| NM_009369    | Tgfbi     | 17 |
| NM_009415    | Tpil      | 17 |
| NM_009419    | Tpst2     | 17 |
| NM_009463    | Ucp1      | 17 |
| NM_009509    | Vil1      | 17 |
| NM_009526    | Wnt6      | 17 |
| NM_009630    | Adora2a   | 17 |
| NM_009770    | Btg3      | 17 |
| NM_009786    | Cacybp    | 17 |
| NM_009804    | Cat       | 17 |
| NM_009888    | Cfh       | 17 |
| NM_009893    | Chrd      | 17 |
| NM_009972    | Csn2      | 17 |
| NM_010180    | Fbln1     | 17 |
| NM_010225    | Foxf2     | 17 |

|           |           |    |
|-----------|-----------|----|
| NM_010353 | Gsg2      | 17 |
| NM_010480 | Hsp90aa1  | 17 |
| NM_010484 | Slc6a4    | 17 |
| NM_010634 | Fabp5     | 17 |
| NM_010736 | Ltbr      | 17 |
| NM_010851 | Myd88     | 17 |
| NM_011014 | Sigmar1   | 17 |
| NM_011427 | Snail     | 17 |
| NM_011455 | Serpina9g | 17 |
| NM_011553 | Tcp10b    | 17 |
| NM_011565 | Tead2     | 17 |
| NM_011704 | Vnn1      | 17 |
| NM_011756 | Zfp36     | 17 |
| NM_011850 | Nr0b2     | 17 |
| NM_011879 | Ik        | 17 |
| NM_012039 | Zw10      | 17 |
| NM_013469 | Anxa11    | 17 |
| NM_013473 | Anxa8     | 17 |
| NM_013501 | Cryaa     | 17 |
| NM_013538 | Cdca3     | 17 |
| NM_013554 | Hoxd10    | 17 |
| NM_013555 | Hoxd9     | 17 |
| NM_013686 | Tcp1      | 17 |
| NM_013779 | Magel2    | 17 |
| NM_013868 | Hspb7     | 17 |
| NM_013888 | Dnajc12   | 17 |
| NM_015735 | Ddb1      | 17 |
| NM_016681 | Chek2     | 17 |
| NM_016717 | Scly      | 17 |
| NM_016762 | Matn2     | 17 |
| NM_016789 | Nptx2     | 17 |
| NM_016926 | Sart3     | 17 |
| NM_018785 | Prpf40a   | 17 |
| NM_018819 | Brp44l    | 17 |
| NM_019438 | Ncapg     | 17 |
| NM_019465 | Crtam     | 17 |
| NM_019475 | Olfrl157  | 17 |
| NM_019480 | Ebag9     | 17 |
| NM_019488 | Slc2a8    | 17 |
| NM_019490 | Uso1      | 17 |
| NM_019538 | Plac1     | 17 |
| NM_019577 | Cc124     | 17 |
| NM_019673 | Actl6a    | 17 |
| NM_019819 | Dusp14    | 17 |
| NM_019913 | Txn2      | 17 |
| NM_020581 | Angptl4   | 17 |
| NM_020586 | Herpud2   | 17 |
| NM_021281 | Ctss      | 17 |
| NM_021387 | Vstm2b    | 17 |
| NM_021456 | Ces1g     | 17 |
| NM_021550 | C1galt1c1 | 17 |
| NM_021554 | Mettl9    | 17 |
| NM_021568 | Pcbp3     | 17 |
| NM_021715 | Chst7     | 17 |

|           |               |    |
|-----------|---------------|----|
| NM_021876 | Eed           | 17 |
| NM_022018 | Fam129a       | 17 |
| NM_022031 | Hapln2        | 17 |
| NM_022313 | Erall         | 17 |
| NM_022992 | Arl6ip5       | 17 |
| NM_023113 | Aspa          | 17 |
| NM_023166 | Fam89b        | 17 |
| NM_023245 | Palmd         | 17 |
| NM_023248 | Sbds          | 17 |
| NM_023633 | 2410016006Rik | 17 |
| NM_023788 | Mageh1        | 17 |
| NM_024242 | Riok1         | 17 |
| NM_024499 | Sgta          | 17 |
| NM_025336 | Chchd3        | 17 |
| NM_025429 | Serpinbla     | 17 |
| NM_025431 | Llph          | 17 |
| NM_025445 | Arfgap3       | 17 |
| NM_025572 | 2610528J11Rik | 17 |
| NM_025699 | 3230401D17Rik | 17 |
| NM_025774 | Prkripl       | 17 |
| NM_025880 | 2410002F23Rik | 17 |
| NM_026174 | Entpd4        | 17 |
| NM_026232 | Slc25a30      | 17 |
| NM_026270 | Akt1s1        | 17 |
| NM_026361 | Pkp4          | 17 |
| NM_026364 | Prpsapl       | 17 |
| NM_026388 | Tprgl         | 17 |
| NM_026480 | Ooep          | 17 |
| NM_026680 | Golt1a        | 17 |
| NM_026785 | Ube2c         | 17 |
| NM_026815 | Upk1a         | 17 |
| NM_026963 | Lzic          | 17 |
| NM_026969 | Sec31a        | 17 |
| NM_027117 | Klhdc2        | 17 |
| NM_027159 | Ccdc115       | 17 |
| NM_027162 | Mif4gd        | 17 |
| NM_027275 | Ptcd3         | 17 |
| NM_027446 | Fam86         | 17 |
| NM_027805 | Ppp6r2        | 17 |
| NM_027978 | Coq2          | 17 |
| NM_027990 | Lypd6b        | 17 |
| NM_028028 | Zswim1        | 17 |
| NM_028049 | Fbxo22        | 17 |
| NM_028221 | Fam192a       | 17 |
| NM_028333 | Angpt11       | 17 |
| NM_028492 | Ccdc103       | 17 |
| NM_028733 | Pacsin3       | 17 |
| NM_028890 | 4931414P19Rik | 17 |
| NM_028938 | Lrriq3        | 17 |
| NM_028980 | Ppp4r4        | 17 |
| NM_029357 | Pcdh1         | 17 |
| NM_029415 | Slc10a6       | 17 |
| NM_029508 | Pcgf5         | 17 |
| NM_029620 | Pcolce2       | 17 |

|           |               |    |
|-----------|---------------|----|
| NM_029852 | Ccdc41        | 17 |
| NM_029857 | Tmco4         | 17 |
| NM_029865 | Ocell         | 17 |
| NM_029906 | 9530003J23Rik | 17 |
| NM_029934 | Mboat7        | 17 |
| NM_029936 | Ddx10         | 17 |
| NM_029948 | Pramef12      | 17 |
| NM_029984 | Fam159b       | 17 |
| NM_030067 | Gpr115        | 17 |
| NM_030729 | Nckipsd       | 17 |
| NM_031181 | Siglece       | 17 |
| NM_031247 | Gimap3        | 17 |
| NM_031380 | Fstl3         | 17 |
| NM_031392 | Wdr6          | 17 |
| NM_031880 | Tnk1          | 17 |
| NM_033370 | Copb1         | 17 |
| NM_033606 | Dqx1          | 17 |
| NM_052993 | Clgalt1       | 17 |
| NM_053100 | Trim8         | 17 |
| NM_053149 | Hemgn         | 17 |
| NM_053179 | Nans          | 17 |
| NM_053201 | Magee1        | 17 |
| NM_080433 | Fezf2         | 17 |
| NM_080454 | Gjc2          | 17 |
| NM_080639 | Timp4         | 17 |
| NM_130452 | Bbox1         | 17 |
| NM_133234 | Bbc3          | 17 |
| NM_133674 | Arhgef5       | 17 |
| NM_133705 | Pycr2         | 17 |
| NM_133966 | Taf5l         | 17 |
| NM_134126 | Ift140        | 17 |
| NM_134156 | Actn1         | 17 |
| NM_138590 | Zcchc7        | 17 |
| NM_138594 | D6Wsu163e     | 17 |
| NM_138602 | Praf2         | 17 |
| NM_139001 | Cspg4         | 17 |
| NM_144794 | Tmem63a       | 17 |
| NM_144828 | Ppp1r1b       | 17 |
| NM_144942 | Csad          | 17 |
| NM_145123 | Crtac1        | 17 |
| NM_145155 | Wasf3         | 17 |
| NM_145385 | Mlf2          | 17 |
| NM_145479 | Klh122        | 17 |
| NM_145530 | Rhov          | 17 |
| NM_145579 | Mypop         | 17 |
| NM_145836 | 6430527G18Rik | 17 |
| NM_145927 | Fntb          | 17 |
| NM_146107 | Actr1b        | 17 |
| NM_153563 | Fam40a        | 17 |
| NM_172120 | Vps41         | 17 |
| NM_172269 | Vps18         | 17 |
| NM_172383 | Tmem125       | 17 |
| NM_172453 | Pif1          | 17 |
| NM_172481 | Nlrp4b        | 17 |

|              |               |    |
|--------------|---------------|----|
| NM_172501    | Nhlrc3        | 17 |
| NM_172549    | Cabin1        | 17 |
| NM_172672    | Ganc          | 17 |
| NM_172756    | Ankle1        | 17 |
| NM_172761    | Mthfsd        | 17 |
| NM_172912    | Abcc12        | 17 |
| NM_173036    | Gpr97         | 17 |
| NM_173738    | Zfp940        | 17 |
| NM_173864    | Gm5077        | 17 |
| NM_174849    | Agbl5         | 17 |
| NM_175443    | Etnk2         | 17 |
| NM_175474    | Fam109a       | 17 |
| NM_175650    | Atp13a5       | 17 |
| NM_177068    | Olfml2b       | 17 |
| NM_177195    | Atp8b5        | 17 |
| NM_177200    | Svopl         | 17 |
| NM_177275    | Amigo3        | 17 |
| NM_177571    | Gm13103       | 17 |
| NM_177820    | Apol10b       | 17 |
| NM_178246    | Smg5          | 17 |
| NM_178253    | Klhdc1        | 17 |
| NM_178612    | Cnpy4         | 17 |
| NM_178689    | Eno4          | 17 |
| NM_178782    | Bcor11        | 17 |
| NM_178885    | AI182371      | 17 |
| NM_181418    | Ushbp1        | 17 |
| NM_181730    | Polr1d        | 17 |
| NM_181753    | Opn5          | 17 |
| NM_183149    | Zfp598        | 17 |
| NM_183197    | Serpinb9f     | 17 |
| NM_194060    | Foxo6         | 17 |
| NM_197959    | Kif18b        | 17 |
| NM_199308    | Mast3         | 17 |
| NM_201353    | Slc6a7        | 17 |
| NM_201373    | Trim56        | 17 |
| NM_201407    | Dennd4b       | 17 |
| NM_207221    | Jmjd1c        | 17 |
| NM_212457    | Bex4          | 17 |
| NR_003644    | 1700049L16Rik | 17 |
| NR_003965    | Gm10653       | 17 |
| NR_028298    | 2610306M01Rik | 17 |
| NR_033448    | 1700025C18Rik | 17 |
| NR_033575    | Gm12839       | 17 |
| NR_033601    | 4930519F09Rik | 17 |
| NR_037854    | Atp6v0c-ps2   | 17 |
| NR_037994    | 2310043L19Rik | 17 |
| NR_038077    | 1700001G11Rik | 17 |
| NR_038129    | 1700085B03Rik | 17 |
| NM_001001183 | Tmem204       | 16 |
| NM_001001446 | Cyp2c44       | 16 |
| NM_001002897 | Atg9b         | 16 |
| NM_001004365 | Actr3b        | 16 |
| NM_001004435 | Pik3r6        | 16 |
| NM_001005508 | Arhgap30      | 16 |

|              |               |    |
|--------------|---------------|----|
| NM_001007572 | Trpv5         | 16 |
| NM_001007578 | Armcx6        | 16 |
| NM_001009950 | Slc38a8       | 16 |
| NM_001012325 | Zfp708        | 16 |
| NM_001013369 | Pfdn4         | 16 |
| NM_001013760 | Gm4937        | 16 |
| NM_001013774 | Kpna7         | 16 |
| NM_001013823 | Krtap4-16     | 16 |
| NM_001018063 | Cxx1b         | 16 |
| NM_001024716 | Triobp        | 16 |
| NM_001024841 | Gm128         | 16 |
| NM_001024853 | Timm9         | 16 |
| NM_001033226 | Calr4         | 16 |
| NM_001033271 | Tmem55b       | 16 |
| NM_001033306 | Shb           | 16 |
| NM_001033312 | Fbx118        | 16 |
| NM_001033411 | Gm826         | 16 |
| NM_001033766 | 4930596D02Rik | 16 |
| NM_001033780 | I830077J02Rik | 16 |
| NM_001037822 | Krtap5-5      | 16 |
| NM_001039228 | Gm6583        | 16 |
| NM_001039390 | Pkig          | 16 |
| NM_001039595 | Gm13043       | 16 |
| NM_001039652 | Oprml         | 16 |
| NM_001039723 | Tmem120b      | 16 |
| NM_001042502 | Pitx2         | 16 |
| NM_001047604 | Ttc21b        | 16 |
| NM_001080777 | 1700029F12Rik | 16 |
| NM_001080941 | Zfp429        | 16 |
| NM_001081009 | Parp8         | 16 |
| NM_001081048 | Slc25a18      | 16 |
| NM_001081128 | Mtr           | 16 |
| NM_001083895 | Srpx2         | 16 |
| NM_001085544 | Gm14744       | 16 |
| NM_001098404 | Nr1i2         | 16 |
| NM_001099277 | Zfp541        | 16 |
| NM_001099774 | Krtap17-1     | 16 |
| NM_001101640 | Tmem207       | 16 |
| NM_001102565 | Alkbh1        | 16 |
| NM_001113460 | Tec           | 16 |
| NM_001113515 | Col2a1        | 16 |
| NM_001113562 | Cutc          | 16 |
| NM_001113735 | Gm13057       | 16 |
| NM_001113736 | Gm13040       | 16 |
| NM_001122732 | Spata3        | 16 |
| NM_001126323 | Gm11565       | 16 |
| NM_001126325 | Gm13088       | 16 |
| NM_001127354 | Gm11938       | 16 |
| NM_001134692 | Ost4          | 16 |
| NM_001136085 | Uba1          | 16 |
| NM_001145888 | Zfat          | 16 |
| NM_001146100 | Hk1           | 16 |
| NM_001159375 | Eif4a1        | 16 |
| NM_001162432 | Lck           | 16 |



|              |               |    |
|--------------|---------------|----|
| NM_001163267 | Ccdc147       | 16 |
| NM_001163522 | Emcn          | 16 |
| NM_001163759 | Dhx57         | 16 |
| NM_001163774 | Taok2         | 16 |
| NM_001163996 | Zfp605        | 16 |
| NM_001164071 | Tank          | 16 |
| NM_001164242 | Prpsap2       | 16 |
| NM_001164763 | Rarres1       | 16 |
| NM_001167799 | Stx5a         | 16 |
| NM_001167908 | Ppp1r3e       | 16 |
| NM_001167921 | Gtf2e2        | 16 |
| NM_001167944 | Zkscan5       | 16 |
| NM_001168371 | Usp19         | 16 |
| NM_001168507 | Tmem11        | 16 |
| NM_001190161 | Psrc1         | 16 |
| NM_001195097 | 3425401B19Rik | 16 |
| NM_001198560 | H2-Q7         | 16 |
| NM_001201460 | H2-Q9         | 16 |
| NM_001204931 | Reep6         | 16 |
| NM_001205231 | U2af2         | 16 |
| NM_007415    | Parp1         | 16 |
| NM_007515    | Slc7a3        | 16 |
| NM_007578    | Cacna1a       | 16 |
| NM_007670    | Cdkn2b        | 16 |
| NM_007722    | Cxcr7         | 16 |
| NM_007799    | Ctse          | 16 |
| NM_007818    | Cyp3a11       | 16 |
| NM_007876    | Dpep1         | 16 |
| NM_007927    | Emd           | 16 |
| NM_007940    | Ephx2         | 16 |
| NM_007999    | Fen1          | 16 |
| NM_008174    | Grm8          | 16 |
| NM_008353    | I112rb1       | 16 |
| NM_008355    | I113          | 16 |
| NM_008385    | Inpp5b        | 16 |
| NM_008434    | Kcnq1         | 16 |
| NM_008545    | Mageb3        | 16 |
| NM_008589    | Mesp2         | 16 |
| NM_008694    | Ngp           | 16 |
| NM_008787    | Pcnt          | 16 |
| NM_009044    | Rel           | 16 |
| NM_009162    | Scg5          | 16 |
| NM_009311    | Tac1          | 16 |
| NM_009358    | Ppp2r5d       | 16 |
| NM_009556    | Zfp42         | 16 |
| NM_009605    | Adipoq        | 16 |
| NM_009609    | Actg1         | 16 |
| NM_009794    | Capn2         | 16 |
| NM_009832    | Ccnk          | 16 |
| NM_009855    | Cd80          | 16 |
| NM_009880    | Cdx1          | 16 |
| NM_009953    | Crhr2         | 16 |
| NM_009973    | Csn1s2b       | 16 |
| NM_009995    | Cyp21a1       | 16 |

|           |           |    |
|-----------|-----------|----|
| NM_010102 | S1pr4     | 16 |
| NM_010291 | Gjb5      | 16 |
| NM_010359 | Gstm3     | 16 |
| NM_010368 | Gusb      | 16 |
| NM_010378 | H2-Aa     | 16 |
| NM_010424 | Hfe       | 16 |
| NM_010427 | Hgf       | 16 |
| NM_010446 | Foxa2     | 16 |
| NM_010499 | Ier2      | 16 |
| NM_010551 | I116      | 16 |
| NM_010599 | Kcnab3    | 16 |
| NM_010626 | Kif7      | 16 |
| NM_010630 | Kifc2     | 16 |
| NM_010769 | Matn1     | 16 |
| NM_010829 | Msh3      | 16 |
| NM_011061 | Padi4     | 16 |
| NM_011120 | Pr17d1    | 16 |
| NM_011161 | Mapk11    | 16 |
| NM_011204 | Ptpn13    | 16 |
| NM_011452 | Serpinb9b | 16 |
| NM_011492 | Stk11     | 16 |
| NM_011672 | Ufd11     | 16 |
| NM_011695 | Vdac2     | 16 |
| NM_011733 | Csda      | 16 |
| NM_011854 | Oasl2     | 16 |
| NM_011867 | Slc26a4   | 16 |
| NM_011897 | Spry2     | 16 |
| NM_011915 | Wif1      | 16 |
| NM_011942 | Lypla2    | 16 |
| NM_011986 | Ncdn      | 16 |
| NM_013642 | Dusp1     | 16 |
| NM_013697 | Ttr       | 16 |
| NM_013800 | Barx2     | 16 |
| NM_013840 | Uxt       | 16 |
| NM_013852 | Abcf3     | 16 |
| NM_013874 | Dpf1      | 16 |
| NM_016662 | Mxd3      | 16 |
| NM_016668 | Bhmt      | 16 |
| NM_016927 | Pkd212    | 16 |
| NM_016970 | Klrg1     | 16 |
| NM_017462 | Polg      | 16 |
| NM_017466 | Ccr12     | 16 |
| NM_019418 | Tnfsf14   | 16 |
| NM_019424 | Hps1      | 16 |
| NM_019426 | Atf7ip    | 16 |
| NM_019479 | Hes6      | 16 |
| NM_019481 | Slc13a1   | 16 |
| NM_019484 | Refbp2    | 16 |
| NM_019563 | Cited4    | 16 |
| NM_019781 | Pex14     | 16 |
| NM_019975 | Hacl1     | 16 |
| NM_020595 | Otor      | 16 |
| NM_021335 | Snrpb2    | 16 |
| NM_021921 | Mapk8ip2  | 16 |

|           |               |    |
|-----------|---------------|----|
| NM_022435 | Sp5           | 16 |
| NM_023472 | Ankra2        | 16 |
| NM_024208 | Echdc3        | 16 |
| NM_024211 | Slc25a11      | 16 |
| NM_025305 | Mrps7         | 16 |
| NM_025379 | Cox7b         | 16 |
| NM_025464 | Tmem218       | 16 |
| NM_025509 | Ostc          | 16 |
| NM_025575 | Sys1          | 16 |
| NM_025645 | Snrnp40       | 16 |
| NM_025656 | Sip1          | 16 |
| NM_025671 | Ogfod2        | 16 |
| NM_025751 | 4933425L06Rik | 16 |
| NM_026077 | 3110040N11Rik | 16 |
| NM_026138 | 6330407J23Rik | 16 |
| NM_026211 | Tmed9         | 16 |
| NM_026528 | 2700060E02Rik | 16 |
| NM_026553 | Yif1a         | 16 |
| NM_026776 | Vps25         | 16 |
| NM_026967 | Rheb11        | 16 |
| NM_027101 | Polr2d        | 16 |
| NM_027193 | Dph5          | 16 |
| NM_027201 | Zfp511        | 16 |
| NM_027310 | Meaf6         | 16 |
| NM_027334 | Mettl7a1      | 16 |
| NM_027394 | Ube2cbp       | 16 |
| NM_027768 | 5430402E10Rik | 16 |
| NM_027816 | Cyp2u1        | 16 |
| NM_027837 | Isx           | 16 |
| NM_027933 | Ranbp3        | 16 |
| NM_028005 | 2310047M10Rik | 16 |
| NM_028093 | Entpd8        | 16 |
| NM_028325 | Zcchc12       | 16 |
| NM_028627 | Psd           | 16 |
| NM_028628 | Lce11         | 16 |
| NM_028958 | Taf71         | 16 |
| NM_028967 | Batf2         | 16 |
| NM_029002 | Nkx6-3        | 16 |
| NM_029162 | Zbtb49        | 16 |
| NM_029347 | Fggy          | 16 |
| NM_029397 | Rbm12         | 16 |
| NM_029422 | Tm7sf4        | 16 |
| NM_029787 | Cyb5r3        | 16 |
| NM_030259 | Rilpl2        | 16 |
| NM_033072 | Mbd6          | 16 |
| NM_033269 | Chrm3         | 16 |
| NM_053011 | Lrplb         | 16 |
| NM_053119 | Echs1         | 16 |
| NM_053168 | Trim11        | 16 |
| NM_054056 | Pawr          | 16 |
| NM_054080 | Akr1c20       | 16 |
| NM_058212 | Dpf3          | 16 |
| NM_080465 | Kcnn2         | 16 |
| NM_130858 | Nxph3         | 16 |

|           |          |    |
|-----------|----------|----|
| NM_130861 | Slcola5  | 16 |
| NM_133183 | Cacng6   | 16 |
| NM_133351 | Prss8    | 16 |
| NM_133726 | St13     | 16 |
| NM_133740 | Prmt3    | 16 |
| NM_133771 | Memol    | 16 |
| NM_133858 | Fam63a   | 16 |
| NM_133903 | Spon2    | 16 |
| NM_133968 | Snape2   | 16 |
| NM_133982 | Rpp25    | 16 |
| NM_134010 | Nup107   | 16 |
| NM_138595 | Gldc     | 16 |
| NM_139293 | Ece2     | 16 |
| NM_144515 | Zfp52    | 16 |
| NM_144525 | Tmem214  | 16 |
| NM_144817 | Camkg    | 16 |
| NM_145070 | Hiplr    | 16 |
| NM_145137 | Mgl2     | 16 |
| NM_145450 | BC022687 | 16 |
| NM_145471 | Lrrc14   | 16 |
| NM_145521 | Ppapdc3  | 16 |
| NM_145536 | BC020535 | 16 |
| NM_145567 | Hibadh   | 16 |
| NM_145581 | Siglec5  | 16 |
| NM_145708 | Obox2    | 16 |
| NM_145916 | Zfp7     | 16 |
| NM_146019 | Chd3     | 16 |
| NM_146235 | Ercc61   | 16 |
| NM_148930 | Rbm5     | 16 |
| NM_148933 | Slco4a1  | 16 |
| NM_148952 | E2f4     | 16 |
| NM_153419 | Grwd1    | 16 |
| NM_153680 | Snx17    | 16 |
| NM_153775 | Ctu2     | 16 |
| NM_170591 | Nup11    | 16 |
| NM_172404 | Ccb11    | 16 |
| NM_172624 | Dpp9     | 16 |
| NM_172656 | Stradb   | 16 |
| NM_172660 | D2Wsu81e | 16 |
| NM_172748 | Fbx119   | 16 |
| NM_172786 | I120ra   | 16 |
| NM_172944 | Itgae    | 16 |
| NM_173027 | Ip6k3    | 16 |
| NM_173365 | Gpr20    | 16 |
| NM_173393 | Xkr6     | 16 |
| NM_173400 | Haus6    | 16 |
| NM_175168 | Ptk7     | 16 |
| NM_175285 | Tmem62   | 16 |
| NM_175324 | Acad11   | 16 |
| NM_175542 | Rttn     | 16 |
| NM_175561 | Penx12   | 16 |
| NM_177268 | Ankrd16  | 16 |
| NM_177301 | Hhrnp1   | 16 |
| NM_177331 | Gen1     | 16 |

|              |               |    |
|--------------|---------------|----|
| NM_177360    | Dmrt3         | 16 |
| NM_177465    | Umod11        | 16 |
| NM_177564    | Dhrs11        | 16 |
| NM_177594    | Mtmr9         | 16 |
| NM_177668    | Skint10       | 16 |
| NM_177717    | 4732456N10Rik | 16 |
| NM_177748    | Kir3dl2       | 16 |
| NM_177752    | Eme1          | 16 |
| NM_178113    | Ncapd3        | 16 |
| NM_178708    | Pcid2         | 16 |
| NM_178877    | Nhedc2        | 16 |
| NM_178908    | Fam26e        | 16 |
| NM_181074    | Lingol        | 16 |
| NM_181075    | 2610524H06Rik | 16 |
| NM_183016    | Cdc42bpb      | 16 |
| NM_198607    | 4930572J05Rik | 16 |
| NM_198702    | Lphn3         | 16 |
| NR_002871    | Vax2os2       | 16 |
| NR_027491    | I14           | 16 |
| NR_027964    | Gm10416       | 16 |
| NR_028258    | Ng23          | 16 |
| NR_028486    | 1700001022Rik | 16 |
| NR_033190    | Gm839         | 16 |
| NR_033332    | Gm12216       | 16 |
| NR_033608    | 1700084J12Rik | 16 |
| NR_036689    | Gm41          | 16 |
| NR_037954    | 1110054M08Rik | 16 |
| NR_038030    | 4930562F07Rik | 16 |
| NM_001001179 | BC048546      | 15 |
| NM_001001445 | Trpv1         | 15 |
| NM_001002267 | Tmem158       | 15 |
| NM_001005422 | Gm1574        | 15 |
| NM_001011780 | Olfr287       | 15 |
| NM_001011873 | Xkr9          | 15 |
| NM_001012306 | Hsd3b3        | 15 |
| NM_001012667 | AI316807      | 15 |
| NM_001013824 | Gm5662        | 15 |
| NM_001017985 | C2cd3         | 15 |
| NM_001024728 | C330021F23Rik | 15 |
| NM_001024848 | Apol7b        | 15 |
| NM_001025360 | Klc1          | 15 |
| NM_001033473 | Odf312        | 15 |
| NM_001033485 | BC048644      | 15 |
| NM_001033922 | Trem14        | 15 |
| NM_001037906 | Nell1         | 15 |
| NM_001039116 | Dmrtc1b       | 15 |
| NM_001039198 | Zfhx2         | 15 |
| NM_001039520 | Dnm2          | 15 |
| NM_001039554 | Angpt17       | 15 |
| NM_001039653 | Lhx3          | 15 |
| NM_001042411 | Leprel        | 15 |
| NM_001045555 | Tulp2         | 15 |
| NM_001078649 | Tmem134       | 15 |
| NM_001081047 | Cnksr1        | 15 |

|              |               |    |
|--------------|---------------|----|
| NM_001081062 | Ccno          | 15 |
| NM_001081069 | Rgs11         | 15 |
| NM_001081121 | 4931429I11Rik | 15 |
| NM_001081241 | Fam65a        | 15 |
| NM_001081424 | Chrna10       | 15 |
| NM_001081672 | Fam43b        | 15 |
| NM_001081970 | Apo18         | 15 |
| NM_001083110 | Pja1          | 15 |
| NM_001083918 | Gm13139       | 15 |
| NM_001085518 | Gm14085       | 15 |
| NM_001085551 | Gm14346       | 15 |
| NM_001099348 | Gm13305       | 15 |
| NM_001101519 | 4932443I19Rik | 15 |
| NM_001109758 | Bcan          | 15 |
| NM_001109985 | Noslap        | 15 |
| NM_001110148 | Mgat1         | 15 |
| NM_001110328 | Fiz1          | 15 |
| NM_001110504 | Capn1         | 15 |
| NM_001122662 | Gm2016        | 15 |
| NM_001126182 | Naip2         | 15 |
| NM_001126314 | Mboat4        | 15 |
| NM_001128599 | Opn4          | 15 |
| NM_001130456 | Sema6b        | 15 |
| NM_001134802 | Apo17e        | 15 |
| NM_001136089 | Anxa10        | 15 |
| NM_001136181 | Hsbp111       | 15 |
| NM_001136259 | Tom1          | 15 |
| NM_001145831 | Kifc3         | 15 |
| NM_001145935 | Zfp691        | 15 |
| NM_001159561 | P2rx6         | 15 |
| NM_001159571 | Ephb4         | 15 |
| NM_001160366 | Srcrib4d      | 15 |
| NM_001161365 | Rin3          | 15 |
| NM_001161665 | Kif26b        | 15 |
| NM_001161855 | 4933416C03Rik | 15 |
| NM_001162872 | Exoc7         | 15 |
| NM_001162918 | Ccdc90b       | 15 |
| NM_001162954 | Gm8267        | 15 |
| NM_001163015 | Gprasp2       | 15 |
| NM_001163401 | I111ral       | 15 |
| NM_001163686 | Dok5          | 15 |
| NM_001163725 | Dyx1c1        | 15 |
| NM_001164263 | 9930023K05Rik | 15 |
| NM_001165894 | Akt1          | 15 |
| NM_001166210 | Myh15         | 15 |
| NM_001168333 | Tinagl1       | 15 |
| NM_001168469 | Ube2m         | 15 |
| NM_001172112 | Dhrs7b        | 15 |
| NM_001177480 | Gm14391       | 15 |
| NM_001190302 | Gm14326       | 15 |
| NM_001190451 | Dcn           | 15 |
| NM_001195271 | Gm362         | 15 |
| NM_001195596 | 2010003K15Rik | 15 |
| NM_001195732 | Fam150a       | 15 |

|              |          |    |
|--------------|----------|----|
| NM_001198823 | App      | 15 |
| NM_001198839 | Bcar1    | 15 |
| NM_001198872 | Dync1i2  | 15 |
| NM_001202445 | Mapk8ip1 | 15 |
| NM_001204201 | Spp1     | 15 |
| NM_001204253 | Clec1b   | 15 |
| NM_001204273 | Lsm2     | 15 |
| NM_001205025 | Jagn1    | 15 |
| NM_007430    | Nr0b1    | 15 |
| NM_007456    | Ap1m1    | 15 |
| NM_007457    | Ap1s1    | 15 |
| NM_007480    | Arf5     | 15 |
| NM_007586    | Calb2    | 15 |
| NM_007596    | Caml     | 15 |
| NM_007649    | Cd48     | 15 |
| NM_007752    | Cp       | 15 |
| NM_007802    | Ctsk     | 15 |
| NM_007842    | Dhx9     | 15 |
| NM_007863    | Mpp3     | 15 |
| NM_008001    | Fgd1     | 15 |
| NM_008089    | Gata1    | 15 |
| NM_008100    | Gcg      | 15 |
| NM_008305    | Hspg2    | 15 |
| NM_008337    | Ifng     | 15 |
| NM_008382    | Inhbe    | 15 |
| NM_008408    | Stt3a    | 15 |
| NM_008469    | Krt15    | 15 |
| NM_008534    | Ly9      | 15 |
| NM_008554    | Asc12    | 15 |
| NM_008606    | Mmp11    | 15 |
| NM_008639    | Mtnr1a   | 15 |
| NM_008713    | Nos3     | 15 |
| NM_008869    | Pla2g4a  | 15 |
| NM_008944    | Psm2     | 15 |
| NM_009053    | Rfng     | 15 |
| NM_009066    | Ring1    | 15 |
| NM_009102    | Rrh      | 15 |
| NM_009143    | Sdf2     | 15 |
| NM_009169    | Shfm1    | 15 |
| NM_009188    | Sin3b    | 15 |
| NM_009228    | Snta1    | 15 |
| NM_009342    | Dynl1b   | 15 |
| NM_009387    | Tk1      | 15 |
| NM_009409    | Top2b    | 15 |
| NM_009451    | Tubb4    | 15 |
| NM_009503    | Vcp      | 15 |
| NM_009508    | Slc32a1  | 15 |
| NM_009515    | Was      | 15 |
| NM_009548    | Rnf112   | 15 |
| NM_009601    | Chrnbl   | 15 |
| NM_009662    | Alox5    | 15 |
| NM_009702    | Aqr      | 15 |
| NM_009849    | Entpd2   | 15 |
| NM_010003    | Cyp2c39  | 15 |

|           |           |    |
|-----------|-----------|----|
| NM_010058 | Dmwd      | 15 |
| NM_010069 | Doc2a     | 15 |
| NM_010098 | Opn3      | 15 |
| NM_010151 | Nr2f1     | 15 |
| NM_010216 | Figf      | 15 |
| NM_010262 | Gbx2      | 15 |
| NM_010460 | Hoxb7     | 15 |
| NM_010469 | Hoxd4     | 15 |
| NM_010493 | Icam1     | 15 |
| NM_010581 | Cd47      | 15 |
| NM_010709 | Eif2d     | 15 |
| NM_010733 | Lrrn3     | 15 |
| NM_010773 | Mbd2      | 15 |
| NM_010908 | Nfkbib    | 15 |
| NM_011018 | Sqstm1    | 15 |
| NM_011044 | Pck1      | 15 |
| NM_011079 | Phkg1     | 15 |
| NM_011232 | Rad1      | 15 |
| NM_011325 | Scnn1b    | 15 |
| NM_011383 | Six5      | 15 |
| NM_011391 | Slc16a7   | 15 |
| NM_011440 | Sox14     | 15 |
| NM_011508 | Eif1      | 15 |
| NM_011568 | Thoc4     | 15 |
| NM_011614 | Tnfsf12   | 15 |
| NM_011675 | Uck1      | 15 |
| NM_011676 | Unc119    | 15 |
| NM_011678 | Usp4      | 15 |
| NM_011738 | Ywhah     | 15 |
| NM_011907 | Trex2     | 15 |
| NM_011927 | Ceacam9   | 15 |
| NM_011948 | Map3k4    | 15 |
| NM_011955 | Nubp1     | 15 |
| NM_013544 | H2-M10. 1 | 15 |
| NM_013556 | Hprt      | 15 |
| NM_013565 | Itga3     | 15 |
| NM_013607 | Myh11     | 15 |
| NM_013645 | Pvalb     | 15 |
| NM_013713 | Krtap15   | 15 |
| NM_013843 | Zfp53     | 15 |
| NM_013907 | Fbxw4     | 15 |
| NM_013933 | Vapa      | 15 |
| NM_016682 | Uba2      | 15 |
| NM_016759 | Rundc3a   | 15 |
| NM_016863 | Fkbp1b    | 15 |
| NM_017400 | Sh3gl3    | 15 |
| NM_017471 | Pbsn      | 15 |
| NM_017472 | Snx3      | 15 |
| NM_019457 | Lrrc6     | 15 |
| NM_019502 | Fxc1      | 15 |
| NM_019742 | Tusc2     | 15 |
| NM_019916 | Tlx3      | 15 |
| NM_019951 | Sec11a    | 15 |
| NM_020052 | Scube2    | 15 |



|           |               |    |
|-----------|---------------|----|
| NM_020261 | Psg23         | 15 |
| NM_020520 | Slc25a20      | 15 |
| NM_020577 | As3mt         | 15 |
| NM_021375 | Rhbg          | 15 |
| NM_021428 | Dexi          | 15 |
| NM_021719 | Cldn15        | 15 |
| NM_021901 | Tlx1          | 15 |
| NM_022312 | Tnr           | 15 |
| NM_023131 | Rce1          | 15 |
| NM_023143 | Clra          | 15 |
| NM_023149 | Cndp2         | 15 |
| NM_023184 | Klf15         | 15 |
| NM_023240 | Eef1d         | 15 |
| NM_023480 | Fahd1         | 15 |
| NM_023716 | Tubb2b        | 15 |
| NM_023721 | Atp6v1d       | 15 |
| NM_023860 | Krtap5-3      | 15 |
| NM_023873 | Cep70         | 15 |
| NM_023913 | Ern1          | 15 |
| NM_024198 | Gpx7          | 15 |
| NM_024223 | Crip2         | 15 |
| NM_024285 | Bves          | 15 |
| NM_025334 | Txndc12       | 15 |
| NM_025346 | Rmnd5b        | 15 |
| NM_025383 | Necap2        | 15 |
| NM_025507 | Snw1          | 15 |
| NM_025508 | Gmpr          | 15 |
| NM_025579 | Taf12         | 15 |
| NM_025730 | Lrrk2         | 15 |
| NM_025739 | Rnf220        | 15 |
| NM_025759 | Speer4d       | 15 |
| NM_025866 | Cdca7         | 15 |
| NM_025988 | Acbd4         | 15 |
| NM_026069 | Rpl37         | 15 |
| NM_026573 | Upf3b         | 15 |
| NM_026623 | Nudt21        | 15 |
| NM_026672 | Gstm7         | 15 |
| NM_026780 | Syf2          | 15 |
| NM_026807 | Krtap4-2      | 15 |
| NM_026844 | 2310061C15Rik | 15 |
| NM_026924 | Ovo12         | 15 |
| NM_027270 | Exoc1         | 15 |
| NM_027397 | Isl2          | 15 |
| NM_027513 | Nup205        | 15 |
| NM_027631 | 4931407G18Rik | 15 |
| NM_027872 | Slc46a3       | 15 |
| NM_027914 | Bbs10         | 15 |
| NM_027921 | Slc16a14      | 15 |
| NM_028019 | Rnf135        | 15 |
| NM_028021 | Myh14         | 15 |
| NM_028055 | Btbd17        | 15 |
| NM_028105 | Adck1         | 15 |
| NM_028125 | Zbtb46        | 15 |
| NM_028603 | Zbtb8a        | 15 |

|           |               |    |
|-----------|---------------|----|
| NM_028770 | Krt80         | 15 |
| NM_028918 | Ttc25         | 15 |
| NM_028934 | 4930452B06Rik | 15 |
| NM_029023 | Scpep1        | 15 |
| NM_029056 | Tdrd9         | 15 |
| NM_029282 | Ttil          | 15 |
| NM_029346 | 2310002L13Rik | 15 |
| NM_029464 | 4930588N13Rik | 15 |
| NM_029565 | Tmem59        | 15 |
| NM_029568 | Mfap4         | 15 |
| NM_029571 | Kti12         | 15 |
| NM_029595 | Pbp2          | 15 |
| NM_029714 | Catsperg2     | 15 |
| NM_029947 | Prdm8         | 15 |
| NM_030046 | Dnajc21       | 15 |
| NM_030068 | Iqch          | 15 |
| NM_030075 | Klhdc8b       | 15 |
| NM_030253 | Parp9         | 15 |
| NM_030566 | Rabep2        | 15 |
| NM_030691 | Igsf6         | 15 |
| NM_031252 | I123a         | 15 |
| NM_031389 | Nlrp4c        | 15 |
| NM_031872 | Tas1r3        | 15 |
| NM_033374 | Dock2         | 15 |
| NM_033572 | Wbscr16       | 15 |
| NM_053261 | Impa2         | 15 |
| NM_053262 | Hsd17b11      | 15 |
| NM_080726 | Rem2          | 15 |
| NM_130886 | Card14        | 15 |
| NM_130889 | Anp32b        | 15 |
| NM_133249 | Ppargc1b      | 15 |
| NM_133256 | Gsx2          | 15 |
| NM_133346 | Asb6          | 15 |
| NM_133756 | Gpn1          | 15 |
| NM_133795 | Ttc1          | 15 |
| NM_133826 | Atp6v1h       | 15 |
| NM_133900 | Psph          | 15 |
| NM_133904 | Acacb         | 15 |
| NM_133934 | Isy1          | 15 |
| NM_133939 | Naa38         | 15 |
| NM_134246 | Acot3         | 15 |
| NM_134438 | Gpr3711       | 15 |
| NM_138596 | Med10         | 15 |
| NM_139064 | Tnip2         | 15 |
| NM_144500 | Osbp12        | 15 |
| NM_144521 | Snap47        | 15 |
| NM_144831 | Dhx8          | 15 |
| NM_144862 | Lims2         | 15 |
| NM_144877 | Mettl13       | 15 |
| NM_144896 | Pet1121       | 15 |
| NM_145158 | Emilin2       | 15 |
| NM_145359 | Fam100a       | 15 |
| NM_145391 | Tapbp1        | 15 |
| NM_145414 | Nsun5         | 15 |

|           |               |    |
|-----------|---------------|----|
| NM_145451 | Gpx6          | 15 |
| NM_145459 | Zfp503        | 15 |
| NM_145489 | AI661453      | 15 |
| NM_145522 | Rabepk        | 15 |
| NM_145826 | I117re        | 15 |
| NM_145827 | Nlrp3         | 15 |
| NM_146032 | Srp68         | 15 |
| NM_146075 | Lemd2         | 15 |
| NM_146162 | Tmem119       | 15 |
| NM_146164 | Lrch4         | 15 |
| NM_146229 | Dync11i1      | 15 |
| NM_146259 | Zfp668        | 15 |
| NM_153056 | Sirt7         | 15 |
| NM_153102 | Zfp352        | 15 |
| NM_153390 | Pxt1          | 15 |
| NM_153398 | Zbtb24        | 15 |
| NM_170703 | Cd40          | 15 |
| NM_170786 | Cntf          | 15 |
| NM_172117 | Entpd6        | 15 |
| NM_172142 | Nfkbid        | 15 |
| NM_172371 | Slc16a13      | 15 |
| NM_172486 | Zfp677        | 15 |
| NM_172488 | 9030625A04Rik | 15 |
| NM_172520 | Arhgef19      | 15 |
| NM_172691 | B230312A22Rik | 15 |
| NM_172747 | Kctd13        | 15 |
| NM_172874 | Podn          | 15 |
| NM_172980 | Slc28a2       | 15 |
| NM_173006 | Pon3          | 15 |
| NM_173757 | Mrps27        | 15 |
| NM_175093 | Trib3         | 15 |
| NM_175150 | Txndc15       | 15 |
| NM_175195 | 3110056003Rik | 15 |
| NM_175276 | Fhod3         | 15 |
| NM_175402 | Rbm15b        | 15 |
| NM_175546 | Wdfy2         | 15 |
| NM_176982 | Fbxo48        | 15 |
| NM_177250 | Lingo4        | 15 |
| NM_177472 | Slx4          | 15 |
| NM_177600 | Ccdc73        | 15 |
| NM_177602 | Wdr25         | 15 |
| NM_177613 | Cdc34         | 15 |
| NM_177665 | Gm4861        | 15 |
| NM_177772 | Bpil2         | 15 |
| NM_177815 | Rft1          | 15 |
| NM_178308 | Abpg          | 15 |
| NM_178418 | Ccdc144b      | 15 |
| NM_178653 | Sccpdh        | 15 |
| NM_178710 | Sik2          | 15 |
| NM_178757 | Irf2bpl       | 15 |
| NM_178799 | Acad12        | 15 |
| NM_178890 | Abtb2         | 15 |
| NM_178932 | Aoc2          | 15 |
| NM_181858 | Cd59b         | 15 |

|              |               |    |
|--------------|---------------|----|
| NM_183161    | Slc17a9       | 15 |
| NM_183175    | Clqtnf9       | 15 |
| NM_183181    | Abhd16b       | 15 |
| NM_183308    | Pon2          | 15 |
| NM_198168    | Ppp2r5b       | 15 |
| NM_207541    | Zfp81         | 15 |
| NR_027965    | 2310061J03Rik | 15 |
| NR_028042    | Gm10012       | 15 |
| NR_028284    | Mcpt-ps1      | 15 |
| NR_033626    | 1810010D01Rik | 15 |
| NR_038063    | Rplp2-ps1     | 15 |
| NM_001002786 | Rab44         | 14 |
| NM_001004144 | Git1          | 14 |
| NM_001007579 | BC080695      | 14 |
| NM_001008419 | Aox311        | 14 |
| NM_001010937 | Gjb6          | 14 |
| NM_001013368 | E2f8          | 14 |
| NM_001013372 | Nrp           | 14 |
| NM_001013810 | Gm5591        | 14 |
| NM_001018031 | Otol1         | 14 |
| NM_001025575 | Cfhr2         | 14 |
| NM_001033214 | E330034G19Rik | 14 |
| NM_001033315 | Hipk4         | 14 |
| NM_001033317 | Cnga4         | 14 |
| NM_001033478 | Fam47e        | 14 |
| NM_001033489 | Rnf207        | 14 |
| NM_001033542 | Slc47a2       | 14 |
| NM_001034059 | Ccdc160       | 14 |
| NM_001034872 | Gm853         | 14 |
| NM_001034895 | Zfr2          | 14 |
| NM_001036293 | Nrbf2         | 14 |
| NM_001037665 | Zfp1          | 14 |
| NM_001037801 | Cd6           | 14 |
| NM_001037918 | Lipt1         | 14 |
| NM_001038676 | Gm4745        | 14 |
| NM_001042407 | Pex10         | 14 |
| NM_001042527 | Blm           | 14 |
| NM_001044741 | Cacnb3        | 14 |
| NM_001079694 | Srsf5         | 14 |
| NM_001080158 | Cenpm         | 14 |
| NM_001081076 | Gucy2g        | 14 |
| NM_001081120 | Fam89a        | 14 |
| NM_001081134 | Kcng1         | 14 |
| NM_001081192 | Hcn4          | 14 |
| NM_001081434 | Osbpl7        | 14 |
| NM_001081658 | Dytn          | 14 |
| NM_001083334 | Bin1          | 14 |
| NM_001085506 | Magea10       | 14 |
| NM_001085543 | Gm14347       | 14 |
| NM_001100110 | Srp54c        | 14 |
| NM_001100444 | Gm5934        | 14 |
| NM_001100461 | Pnma5         | 14 |
| NM_001100616 | Vmn2r121      | 14 |
| NM_001102471 | Cnnm2         | 14 |

|              |               |    |
|--------------|---------------|----|
| NM_001111049 | Cd151         | 14 |
| NM_001113408 | Ldb1          | 14 |
| NM_001115018 | Suv420h2      | 14 |
| NM_001128080 | Tspan32       | 14 |
| NM_001136270 | Prr24         | 14 |
| NM_001142701 | Hmha1         | 14 |
| NM_001145878 | Gm5082        | 14 |
| NM_001146085 | Fbxo34        | 14 |
| NM_001146196 | Scin          | 14 |
| NM_001159328 | Hgs           | 14 |
| NM_001159374 | Krt32         | 14 |
| NM_001159652 | Gpr62         | 14 |
| NM_001159725 | Rab17         | 14 |
| NM_001161548 | Tmem184a      | 14 |
| NM_001161799 | Mfap2         | 14 |
| NM_001162428 | 1700012B07Rik | 14 |
| NM_001162911 | Zfp934        | 14 |
| NM_001163357 | Gm12169       | 14 |
| NM_001163394 | Evl           | 14 |
| NM_001163434 | Hspa5         | 14 |
| NM_001163525 | S100a14       | 14 |
| NM_001163536 | Dnajc5b       | 14 |
| NM_001163614 | Ascl4         | 14 |
| NM_001164259 | Fgfr11        | 14 |
| NM_001166173 | Dmkn          | 14 |
| NM_001166377 | Armex1        | 14 |
| NM_001166580 | 8430408G22Rik | 14 |
| NM_001166627 | Dynl1f        | 14 |
| NM_001166630 | Dynl1c        | 14 |
| NM_001167910 | Mbtps1        | 14 |
| NM_001170540 | Btf3          | 14 |
| NM_001170869 | Wibg          | 14 |
| NM_001190320 | Clec4n        | 14 |
| NM_001198831 | Ddr1          | 14 |
| NM_001198984 | Tcof1         | 14 |
| NM_001201390 | LOC100502936  | 14 |
| NM_001204071 | Crisp2        | 14 |
| NM_001204333 | Cyp4f14       | 14 |
| NM_007382    | Acadm         | 14 |
| NM_007414    | Adprh         | 14 |
| NM_007461    | Apba2         | 14 |
| NM_007484    | Rhoc          | 14 |
| NM_007486    | Arhgdib       | 14 |
| NM_007511    | Atp7b         | 14 |
| NM_007650    | Cd5           | 14 |
| NM_007703    | Elov13        | 14 |
| NM_007785    | Csn1s2a       | 14 |
| NM_007813    | Cyp2b13       | 14 |
| NM_007838    | Ddost         | 14 |
| NM_007938    | Epha6         | 14 |
| NM_007951    | Erh           | 14 |
| NM_007968    | Ewsr1         | 14 |
| NM_008053    | Fxr1          | 14 |
| NM_008069    | Gabrb1        | 14 |

|           |          |    |
|-----------|----------|----|
| NM_008295 | Hsd3b5   | 14 |
| NM_008317 | Hyal1    | 14 |
| NM_008368 | I12rb    | 14 |
| NM_008396 | Itga2    | 14 |
| NM_008473 | Krt1     | 14 |
| NM_008508 | Lor      | 14 |
| NM_008542 | Smad6    | 14 |
| NM_008675 | Nb11     | 14 |
| NM_008701 | Nkx2-9   | 14 |
| NM_008704 | Nme1     | 14 |
| NM_008759 | Sebox    | 14 |
| NM_008786 | Pcmt1    | 14 |
| NM_008827 | Pgf      | 14 |
| NM_009047 | Rem1     | 14 |
| NM_009381 | Thrsp    | 14 |
| NM_009413 | Tpd5211  | 14 |
| NM_009418 | Tpp2     | 14 |
| NM_009480 | Usf1     | 14 |
| NM_009785 | Cacna2d3 | 14 |
| NM_009795 | Capns1   | 14 |
| NM_009811 | Casp6    | 14 |
| NM_009926 | Coll1a2  | 14 |
| NM_009950 | Cradd    | 14 |
| NM_010239 | Fth1     | 14 |
| NM_010326 | Gplba    | 14 |
| NM_010347 | Aes      | 14 |
| NM_010362 | Gstol    | 14 |
| NM_010387 | H2-DMb1  | 14 |
| NM_010445 | Hmx1     | 14 |
| NM_010571 | Irs3     | 14 |
| NM_010577 | Itga5    | 14 |
| NM_010633 | Uhmkl    | 14 |
| NM_010668 | Krt2     | 14 |
| NM_010669 | Krt6b    | 14 |
| NM_010671 | Krtap13  | 14 |
| NM_010695 | Lcn4     | 14 |
| NM_010710 | Lhx2     | 14 |
| NM_010866 | Myod1    | 14 |
| NM_011015 | Orc1     | 14 |
| NM_011045 | Pcna     | 14 |
| NM_011105 | Pkdrej   | 14 |
| NM_011279 | Rnf7     | 14 |
| NM_011280 | Trim10   | 14 |
| NM_011377 | Sim2     | 14 |
| NM_011407 | Slfn1    | 14 |
| NM_011437 | Sox10    | 14 |
| NM_011526 | Tagln    | 14 |
| NM_011536 | Tbx4     | 14 |
| NM_011591 | Timm17b  | 14 |
| NM_011592 | Timm44   | 14 |
| NM_011658 | Twist1   | 14 |
| NM_011823 | Gpr34    | 14 |
| NM_011832 | Insrr    | 14 |
| NM_011876 | Twf2     | 14 |

|           |               |    |
|-----------|---------------|----|
| NM_011900 | Mpdu1         | 14 |
| NM_011956 | Nubp2         | 14 |
| NM_012018 | Cep110        | 14 |
| NM_012030 | Slc9a3r1      | 14 |
| NM_013477 | Atp6v0d1      | 14 |
| NM_013559 | Hsph1         | 14 |
| NM_013628 | Pcsk1         | 14 |
| NM_013666 | St8sia5       | 14 |
| NM_013690 | Tek           | 14 |
| NM_013708 | Nr2e3         | 14 |
| NM_013821 | Hsd3b6        | 14 |
| NM_013866 | Zfp385a       | 14 |
| NM_015796 | Fbxo17        | 14 |
| NM_015811 | Rgs1          | 14 |
| NM_016658 | Galt          | 14 |
| NM_016689 | Aqp3          | 14 |
| NM_016907 | Spint1        | 14 |
| NM_016964 | Stag3         | 14 |
| NM_017372 | Lyz2          | 14 |
| NM_018731 | Atp4a         | 14 |
| NM_018757 | Nme6          | 14 |
| NM_018780 | Sfrp5         | 14 |
| NM_018859 | Akr1e1        | 14 |
| NM_019501 | Pdss1         | 14 |
| NM_019564 | Htral         | 14 |
| NM_019727 | Snx1          | 14 |
| NM_019755 | Plp2          | 14 |
| NM_019950 | Chst5         | 14 |
| NM_019952 | Clcf1         | 14 |
| NM_020264 | Pate4         | 14 |
| NM_020601 | Tb11x         | 14 |
| NM_020625 | Zbtb22        | 14 |
| NM_021053 | Slc46a2       | 14 |
| NM_021278 | Tmsb4x        | 14 |
| NM_021353 | Slc26a3       | 14 |
| NM_021354 | Drg2          | 14 |
| NM_021419 | Rnf8          | 14 |
| NM_021528 | Chst12        | 14 |
| NM_021555 | Fam203a       | 14 |
| NM_021879 | Oca2          | 14 |
| NM_021887 | I121r         | 14 |
| NM_023175 | Nit2          | 14 |
| NM_023746 | Pr15a1        | 14 |
| NM_024243 | Fucal         | 14 |
| NM_024435 | Nts           | 14 |
| NM_024440 | Der13         | 14 |
| NM_025273 | Pcbd1         | 14 |
| NM_025321 | Sdhc          | 14 |
| NM_025375 | Wbscr22       | 14 |
| NM_025380 | Eef1e1        | 14 |
| NM_025395 | Chchd5        | 14 |
| NM_025420 | Lcelm         | 14 |
| NM_025427 | 1190002H23Rik | 14 |
| NM_025442 | Alg5          | 14 |

|           |               |    |
|-----------|---------------|----|
| NM_025513 | Exosc3        | 14 |
| NM_025605 | 2400001E08Rik | 14 |
| NM_025630 | Aggf1         | 14 |
| NM_025735 | Map11c3a      | 14 |
| NM_025749 | Zfp474        | 14 |
| NM_025753 | 4933425020Rik | 14 |
| NM_025923 | Fanc1         | 14 |
| NM_026012 | Nradd         | 14 |
| NM_026017 | Ctdnep1       | 14 |
| NM_026027 | Pfdn1         | 14 |
| NM_026082 | Dock7         | 14 |
| NM_026083 | Zc3h13        | 14 |
| NM_026282 | Spc24         | 14 |
| NM_026335 | Lcelh         | 14 |
| NM_026350 | Ccdc130       | 14 |
| NM_026447 | Ppm1m         | 14 |
| NM_026527 | Chac2         | 14 |
| NM_026644 | Agpat4        | 14 |
| NM_026763 | Col6a4        | 14 |
| NM_026849 | Mtmr14        | 14 |
| NM_026853 | Asb11         | 14 |
| NM_026940 | Ydjc          | 14 |
| NM_026988 | Ptms          | 14 |
| NM_026994 | Cryz11        | 14 |
| NM_027113 | Wdr5b         | 14 |
| NM_027122 | Mfsd3         | 14 |
| NM_027153 | Pir           | 14 |
| NM_027198 | Zswim7        | 14 |
| NM_027217 | 1810046K07Rik | 14 |
| NM_027382 | Hdac8         | 14 |
| NM_027455 | Qpct          | 14 |
| NM_027487 | Ccdc53        | 14 |
| NM_027570 | Ldhd          | 14 |
| NM_027592 | Taf9          | 14 |
| NM_027600 | 4921504E06Rik | 14 |
| NM_027801 | 2610015P09Rik | 14 |
| NM_027808 | Alpk1         | 14 |
| NM_027941 | Lrrc34        | 14 |
| NM_027979 | Chit1         | 14 |
| NM_028070 | Alkbh4        | 14 |
| NM_028193 | Brf1          | 14 |
| NM_028746 | Slc7a13       | 14 |
| NM_028961 | 4933433C11Rik | 14 |
| NM_029458 | Hormad2       | 14 |
| NM_029659 | Styx11        | 14 |
| NM_029746 | Cog2          | 14 |
| NM_029747 | 2410137M14Rik | 14 |
| NM_029751 | Rpl18a        | 14 |
| NM_029790 | Mettl15       | 14 |
| NM_029959 | Lcn9          | 14 |
| NM_030004 | Cry11         | 14 |
| NM_030063 | Acbd7         | 14 |
| NM_030098 | Rnase6        | 14 |
| NM_030113 | Arhgap10      | 14 |



|           |               |    |
|-----------|---------------|----|
| NM_030199 | Zfp623        | 14 |
| NM_030221 | Nadsyn1       | 14 |
| NM_030714 | Dtx3          | 14 |
| NM_030731 | Trim23        | 14 |
| NM_031403 | Dbr1          | 14 |
| NM_033610 | Sncb          | 14 |
| NM_053173 | Kifc5b        | 14 |
| NM_053244 | Kiss1r        | 14 |
| NM_080729 | I125          | 14 |
| NM_080849 | Nek8          | 14 |
| NM_126165 | Vps4a         | 14 |
| NM_133237 | Apcdd1        | 14 |
| NM_133238 | Cd209a        | 14 |
| NM_133670 | Sult1a1       | 14 |
| NM_133712 | Klk10         | 14 |
| NM_133743 | Lypd3         | 14 |
| NM_133840 | Clp1          | 14 |
| NM_133932 | Tada3         | 14 |
| NM_134149 | AI837181      | 14 |
| NM_134155 | Brms1         | 14 |
| NM_134471 | Kif2c         | 14 |
| NM_138652 | Atp12a        | 14 |
| NM_139307 | Vasn          | 14 |
| NM_144855 | Cbs           | 14 |
| NM_144926 | Sez6l2        | 14 |
| NM_144954 | Ppil2         | 14 |
| NM_145445 | Eif2b2        | 14 |
| NM_145467 | Itgbl1        | 14 |
| NM_145563 | Zfp932        | 14 |
| NM_145570 | Fam176a       | 14 |
| NM_145825 | Cetn4         | 14 |
| NM_145837 | I117d         | 14 |
| NM_145947 | Slc26a7       | 14 |
| NM_145999 | Rhot2         | 14 |
| NM_146085 | Apbb3         | 14 |
| NM_147201 | Nrbp1         | 14 |
| NM_152800 | Tor2a         | 14 |
| NM_153053 | Sf3b4         | 14 |
| NM_153069 | Leap2         | 14 |
| NM_153150 | Slc25a1       | 14 |
| NM_153424 | Nphp4         | 14 |
| NM_153511 | I11f9         | 14 |
| NM_153595 | BC030307      | 14 |
| NM_153804 | Plekhg3       | 14 |
| NM_172118 | My19          | 14 |
| NM_172296 | Dmrta2        | 14 |
| NM_172400 | Dnajc8        | 14 |
| NM_172412 | Gpc2          | 14 |
| NM_172418 | Mamstr        | 14 |
| NM_172437 | Pus7l         | 14 |
| NM_172461 | Nek11         | 14 |
| NM_172505 | A730008H23Rik | 14 |
| NM_172506 | Boc           | 14 |
| NM_172557 | Rufy1         | 14 |

|              |               |    |
|--------------|---------------|----|
| NM_172697    | Prpf38a       | 14 |
| NM_172749    | Zfp646        | 14 |
| NM_172760    | Elmo3         | 14 |
| NM_172809    | Sacs          | 14 |
| NM_173023    | Catsperb      | 14 |
| NM_173378    | Trp53bp2      | 14 |
| NM_173862    | Fam83a        | 14 |
| NM_175166    | 5430419D17Rik | 14 |
| NM_175286    | Tprn          | 14 |
| NM_175375    | Ankhd1        | 14 |
| NM_175441    | Mylk3         | 14 |
| NM_176979    | Topbp1        | 14 |
| NM_177152    | Lrig3         | 14 |
| NM_177445    | Dars          | 14 |
| NM_177471    | Ccdc69        | 14 |
| NM_177789    | Vsig4         | 14 |
| NM_177861    | Tmem67        | 14 |
| NM_178254    | Tcf15         | 14 |
| NM_178363    | Ylpm1         | 14 |
| NM_178373    | Cidec         | 14 |
| NM_178616    | Psmc11        | 14 |
| NM_178713    | Aldh8a1       | 14 |
| NM_181390    | Mustn1        | 14 |
| NM_181594    | Edc4          | 14 |
| NM_183096    | Ttc29         | 14 |
| NM_183126    | 6030498E09Rik | 14 |
| NM_183182    | BC055111      | 14 |
| NM_183263    | Rnmt11        | 14 |
| NM_194462    | Akap9         | 14 |
| NM_198030    | Hsd17b13      | 14 |
| NM_198425    | Eid2          | 14 |
| NM_199316    | 4922501C03Rik | 14 |
| NM_199477    | Mettl7a2      | 14 |
| NM_207280    | Ccdc121       | 14 |
| NR_003964    | Tubb2a-ps2    | 14 |
| NR_015497    | 9330133014Rik | 14 |
| NR_015588    | 4932441J04Rik | 14 |
| NR_026688    | 2010001M06Rik | 14 |
| NR_027919    | Bambi-ps1     | 14 |
| NR_029433    | 1700003G18Rik | 14 |
| NR_033539    | Gm12298       | 14 |
| NR_036590    | 1700001K23Rik | 14 |
| NM_001001295 | Dis3l         | 13 |
| NM_001001999 | Gp1bb         | 13 |
| NM_001002927 | Penk          | 13 |
| NM_001004150 | A4galt        | 13 |
| NM_001004194 | Nlrp4e        | 13 |
| NM_001008421 | Nol10         | 13 |
| NM_001009927 | Smcr7         | 13 |
| NM_001010826 | Kctd14        | 13 |
| NM_001013609 | Tex24         | 13 |
| NM_001024508 | Brd9          | 13 |
| NM_001024705 | Prpmp5        | 13 |
| NM_001025103 | Efcab4a       | 13 |

|              |               |       |    |
|--------------|---------------|-------|----|
| NM_001033126 | Cd27          |       | 13 |
| NM_001033177 | Krt76         |       | 13 |
| NM_001033248 | Gm266         |       | 13 |
| NM_001033262 |               | 9-Mar | 13 |
| NM_001033383 | Zfp865        |       | 13 |
| NM_001033416 | Gal3st4       |       | 13 |
| NM_001033463 | Tatdn2        |       | 13 |
| NM_001033534 | Layn          |       | 13 |
| NM_001033548 | 6030429G01Rik |       | 13 |
| NM_001034101 | Gm13119       |       | 13 |
| NM_001037859 | Csf1r         |       | 13 |
| NM_001039192 | Gmfg          |       | 13 |
| NM_001039239 | Zfp808        |       | 13 |
| NM_001040130 | Tmem141       |       | 13 |
| NM_001040696 | Nlrplb        |       | 13 |
| NM_001048148 | Zgpat         |       | 13 |
| NM_001048189 | Agbl4         |       | 13 |
| NM_001048196 | Krtap4-1      |       | 13 |
| NM_001079932 | Trim72        |       | 13 |
| NM_001080771 | Prdm13        |       | 13 |
| NM_001080781 | 1700029H14Rik |       | 13 |
| NM_001081012 | 4930473A06Rik |       | 13 |
| NM_001081155 | Raplga        |       | 13 |
| NM_001081162 | Slc4a11       |       | 13 |
| NM_001081169 | Aspg          |       | 13 |
| NM_001081181 | 9430016H08Rik |       | 13 |
| NM_001081198 | Tmem182       |       | 13 |
| NM_001081260 | Tnks1bp1      |       | 13 |
| NM_001081340 | Setd2         |       | 13 |
| NM_001081654 | Tex264        |       | 13 |
| NM_001081679 | Tomt          |       | 13 |
| NM_001083807 | Rusc1         |       | 13 |
| NM_001085511 | 4932429P05Rik |       | 13 |
| NM_001085513 | Fam131c       |       | 13 |
| NM_001085523 | Gm14374       |       | 13 |
| NM_001085540 | Pramef17      |       | 13 |
| NM_001085541 | Gm13128       |       | 13 |
| NM_001085545 | Gm14345       |       | 13 |
| NM_001085552 | Gm14351       |       | 13 |
| NM_001085553 | Gm10921       |       | 13 |
| NM_001085554 | Gm10922       |       | 13 |
| NM_001099297 | Duox1         |       | 13 |
| NM_001099333 | Gm2863        |       | 13 |
| NM_001099643 | Gm3750        |       | 13 |
| NM_001099675 | Tomm5         |       | 13 |
| NM_001103171 | Myo15         |       | 13 |
| NM_001109748 | Tomm40        |       | 13 |
| NM_001109913 | Hnrnpm        |       | 13 |
| NM_001111286 | Omt2a         |       | 13 |
| NM_001113283 | BC031353      |       | 13 |
| NM_001114328 | Ccp1          |       | 13 |
| NM_001123372 | Gm3435        |       | 13 |
| NM_001134741 | Tdrd5         |       | 13 |
| NM_001135991 | Krtap10-4     |       | 13 |

|              |               |    |
|--------------|---------------|----|
| NM_001136056 | Cntfr         | 13 |
| NM_001141946 | Mkks          | 13 |
| NM_001141981 | Rbm43         | 13 |
| NM_001142690 | Dmrtd1c2      | 13 |
| NM_001142691 | Dmrtd1c1      | 13 |
| NM_001145100 | Gm13718       | 13 |
| NM_001145929 | Thap3         | 13 |
| NM_001146049 | Htatip2       | 13 |
| NM_001146107 | Gm10696       | 13 |
| NM_001146222 | Dpy30         | 13 |
| NM_001146347 | Fam57b        | 13 |
| NM_001159367 | Per1          | 13 |
| NM_001159415 | Ces3b         | 13 |
| NM_001159591 | Csnk1g2       | 13 |
| NM_001162906 | 2410089E03Rik | 13 |
| NM_001162943 | Dchs1         | 13 |
| NM_001163421 | Tatdn3        | 13 |
| NM_001164681 | Ces3a         | 13 |
| NM_001166450 | Slc25a14      | 13 |
| NM_001166589 | Eif5a         | 13 |
| NM_001167991 | Hook2         | 13 |
| NM_001168334 | Gm2799        | 13 |
| NM_001168337 | Gm2825        | 13 |
| NM_001170959 | Pde6c         | 13 |
| NM_001177878 | Phka2         | 13 |
| NM_001177966 | 4930480E11Rik | 13 |
| NM_001190385 | Caly          | 13 |
| NM_001195088 | Tmc8          | 13 |
| NM_001199062 | Gm4461        | 13 |
| NM_001199154 | Sncaip        | 13 |
| NM_001199210 | 4931408A02Rik | 13 |
| NM_001199940 | Serpina3i     | 13 |
| NM_001201367 | Tmem200b      | 13 |
| NM_001204904 | 4930558K02Rik | 13 |
| NM_001204910 | AI607873      | 13 |
| NM_007492    | Arx           | 13 |
| NM_007519    | Baat          | 13 |
| NM_007681    | Cenpa         | 13 |
| NM_007686    | Cfi           | 13 |
| NM_007772    | Hivep1        | 13 |
| NM_008033    | Fnta          | 13 |
| NM_008062    | G6pdx         | 13 |
| NM_008140    | Gnat1         | 13 |
| NM_008235    | Hes1          | 13 |
| NM_008292    | Hsd17b4       | 13 |
| NM_008326    | Irgm1         | 13 |
| NM_008349    | I110rb        | 13 |
| NM_008384    | Inpp1         | 13 |
| NM_008398    | Itga7         | 13 |
| NM_008475    | Krt4          | 13 |
| NM_008555    | Masp1         | 13 |
| NM_008587    | Mertk         | 13 |
| NM_008699    | Nkx2-3        | 13 |
| NM_008846    | Pip5k1b       | 13 |

|           |          |    |
|-----------|----------|----|
| NM_008988 | Igdcc3   | 13 |
| NM_009014 | Rad5111  | 13 |
| NM_009022 | Aldh1a2  | 13 |
| NM_009026 | Rasd1    | 13 |
| NM_009121 | Sat1     | 13 |
| NM_009125 | Atxn2    | 13 |
| NM_009178 | St3gal4  | 13 |
| NM_009225 | Snrpb    | 13 |
| NM_009236 | Sox18    | 13 |
| NM_009296 | Supt4h1  | 13 |
| NM_009309 | T        | 13 |
| NM_009314 | Tacr2    | 13 |
| NM_009317 | Tal2     | 13 |
| NM_009514 | Vpreb3   | 13 |
| NM_009541 | Zbtb17   | 13 |
| NM_009664 | Ambn     | 13 |
| NM_009704 | Areg     | 13 |
| NM_009719 | Neurog3  | 13 |
| NM_009735 | B2m      | 13 |
| NM_009813 | Casq1    | 13 |
| NM_010047 | Dgcr6    | 13 |
| NM_010073 | Dpm2     | 13 |
| NM_010131 | Emx1     | 13 |
| NM_010165 | Eya2     | 13 |
| NM_010172 | F7       | 13 |
| NM_010236 | Fpgs     | 13 |
| NM_010479 | Hspala   | 13 |
| NM_010573 | Irx1     | 13 |
| NM_010655 | Kpna2    | 13 |
| NM_010660 | Krt10    | 13 |
| NM_010667 | Krt86    | 13 |
| NM_010675 | Krtap8-1 | 13 |
| NM_010712 | Lhx4     | 13 |
| NM_010738 | Ly6a     | 13 |
| NM_010761 | Cendbp1  | 13 |
| NM_010835 | Msx1     | 13 |
| NM_010865 | Myoc     | 13 |
| NM_010957 | Ogg1     | 13 |
| NM_011075 | Abcb1b   | 13 |
| NM_011175 | Lgmn     | 13 |
| NM_011322 | Scn1b    | 13 |
| NM_011349 | Sema3f   | 13 |
| NM_011477 | Sprrr2k  | 13 |
| NM_011495 | Plk4     | 13 |
| NM_011633 | Traf5    | 13 |
| NM_011716 | Wfs1     | 13 |
| NM_011760 | Zfp54    | 13 |
| NM_011777 | Zyx      | 13 |
| NM_011796 | Capn10   | 13 |
| NM_011797 | Car14    | 13 |
| NM_011811 | Farsb    | 13 |
| NM_011852 | Oas1g    | 13 |
| NM_012035 | Trpc7    | 13 |
| NM_013470 | Anxa3    | 13 |

|           |               |    |
|-----------|---------------|----|
| NM_013546 | Hebp1         | 13 |
| NM_013612 | Slc11a1       | 13 |
| NM_013755 | Gyg           | 13 |
| NM_013819 | H2-M3         | 13 |
| NM_013863 | Bag3          | 13 |
| NM_013867 | Bcar3         | 13 |
| NM_013895 | Timm13        | 13 |
| NM_013914 | Snai3         | 13 |
| NM_016687 | Sfrp4         | 13 |
| NM_016750 | H2afz         | 13 |
| NM_018755 | Pgcp          | 13 |
| NM_018809 | Ptf1a         | 13 |
| NM_018826 | Irx5          | 13 |
| NM_018869 | Grk5          | 13 |
| NM_019403 | Rnf5          | 13 |
| NM_019441 | Ppt2          | 13 |
| NM_019570 | Rev1          | 13 |
| NM_019584 | Becn1         | 13 |
| NM_019642 | Rpn2          | 13 |
| NM_019665 | Arl6          | 13 |
| NM_019720 | Cyb561d2      | 13 |
| NM_019757 | Fzr1          | 13 |
| NM_019767 | Arpc1a        | 13 |
| NM_019780 | Vps29         | 13 |
| NM_019928 | Klk4          | 13 |
| NM_020576 | Psors1c2      | 13 |
| NM_021363 | Svs3a         | 13 |
| NM_021380 | I120          | 13 |
| NM_021407 | Trem3         | 13 |
| NM_021441 | Taf1c         | 13 |
| NM_022418 | Tmub1         | 13 |
| NM_022891 | Rpl23         | 13 |
| NM_023209 | Pbk           | 13 |
| NM_023256 | Krt20         | 13 |
| NM_023370 | Cdh23         | 13 |
| NM_023784 | Yipf7         | 13 |
| NM_024172 | Hspbp1        | 13 |
| NM_024229 | Pcyt2         | 13 |
| NM_024240 | Gins4         | 13 |
| NM_024442 | Cyp4f16       | 13 |
| NM_025316 | Ndufb5        | 13 |
| NM_025362 | Dnajc30       | 13 |
| NM_025387 | Tmem14c       | 13 |
| NM_025435 | Thoc7         | 13 |
| NM_025466 | Gkn1          | 13 |
| NM_025546 | Rsl1d1        | 13 |
| NM_025653 | 3110001I22Rik | 13 |
| NM_025680 | Ctnnb1        | 13 |
| NM_025777 | Duoxa2        | 13 |
| NM_025854 | Cir1          | 13 |
| NM_025910 | Mina          | 13 |
| NM_026086 | Nanp          | 13 |
| NM_026120 | 2410127L17Rik | 13 |
| NM_026195 | Atic          | 13 |

|           |               |    |
|-----------|---------------|----|
| NM_026286 | Ftmt          | 13 |
| NM_026352 | Ppid          | 13 |
| NM_026377 | 6330577E15Rik | 13 |
| NM_026391 | Ppp2r2d       | 13 |
| NM_026489 | Hormad1       | 13 |
| NM_026494 | Ppcs          | 13 |
| NM_026510 | Ftsj2         | 13 |
| NM_026546 | Fam173b       | 13 |
| NM_026560 | Cdca8         | 13 |
| NM_026565 | Apool         | 13 |
| NM_026739 | 9530077C05Rik | 13 |
| NM_026913 | Mitd1         | 13 |
| NM_027032 | Pacrg         | 13 |
| NM_027220 | Prss32        | 13 |
| NM_027363 | 2010110P09Rik | 13 |
| NM_027411 | Ccdc99        | 13 |
| NM_027445 | Rnf167        | 13 |
| NM_027452 | Lrfn2         | 13 |
| NM_027581 | Lrrc63        | 13 |
| NM_027702 | 4933421I07Rik | 13 |
| NM_027782 | Kctd6         | 13 |
| NM_027802 | Obox1         | 13 |
| NM_027913 | Vwce          | 13 |
| NM_027955 | Gmcl11        | 13 |
| NM_028040 | Rpusd4        | 13 |
| NM_028094 | Ugt2a3        | 13 |
| NM_028176 | Cda           | 13 |
| NM_028230 | Shmt2         | 13 |
| NM_028236 | Ceacam18      | 13 |
| NM_028336 | Tmem107       | 13 |
| NM_028765 | Acox1         | 13 |
| NM_028816 | Xpo6          | 13 |
| NM_029025 | Tmem81        | 13 |
| NM_029197 | 4930528F23Rik | 13 |
| NM_029198 | 4930538K18Rik | 13 |
| NM_029530 | 6330527006Rik | 13 |
| NM_029858 | Ston1         | 13 |
| NM_029924 | Mbd5          | 13 |
| NM_030025 | Ccdc150       | 13 |
| NM_030178 | Brpf1         | 13 |
| NM_030215 | Wrnip1        | 13 |
| NM_030248 | Cdk5rap3      | 13 |
| NM_030709 | Tmprss5       | 13 |
| NM_033080 | Nudt19        | 13 |
| NM_033622 | Tnfsf13b      | 13 |
| NM_053178 | Acsbg1        | 13 |
| NM_053249 | Krt82         | 13 |
| NM_054081 | Mtal          | 13 |
| NM_133226 | Pdzd3         | 13 |
| NM_133359 | AY026312      | 13 |
| NM_133730 | Krt25         | 13 |
| NM_133746 | Calhm2        | 13 |
| NM_133930 | Creld1        | 13 |
| NM_134007 | Cisd1         | 13 |

|           |               |    |
|-----------|---------------|----|
| NM_134029 | Nt5m          | 13 |
| NM_134071 | Ankrd32       | 13 |
| NM_144786 | Ggt7          | 13 |
| NM_144916 | Tmem150a      | 13 |
| NM_145211 | Oas1a         | 13 |
| NM_145353 | Yipf3         | 13 |
| NM_145402 | Tmem51        | 13 |
| NM_145418 | BC013529      | 13 |
| NM_145535 | Sdcbp2        | 13 |
| NM_145586 | Tmem159       | 13 |
| NM_145617 | Herc1         | 13 |
| NM_145707 | Obox3         | 13 |
| NM_146009 | Cep290        | 13 |
| NM_146015 | Efemp1        | 13 |
| NM_152813 | Plcd3         | 13 |
| NM_153072 | Hus1b         | 13 |
| NM_153193 | Hsd3b2        | 13 |
| NM_153417 | Trpm6         | 13 |
| NM_153784 | Ccdc64b       | 13 |
| NM_153790 | Scarf2        | 13 |
| NM_153795 | Fermt3        | 13 |
| NM_172526 | Ttc24         | 13 |
| NM_172679 | 4932438A13Rik | 13 |
| NM_172702 | Serinc2       | 13 |
| NM_172733 | Dera          | 13 |
| NM_172793 | Btnl9         | 13 |
| NM_172799 | Ttll6         | 13 |
| NM_172831 | E230025N22Rik | 13 |
| NM_173763 | Ccb12         | 13 |
| NM_174990 | Gimap4        | 13 |
| NM_175034 | Slc24a5       | 13 |
| NM_175130 | Trpm4         | 13 |
| NM_175240 | Fam187b       | 13 |
| NM_175454 | C630004H02Rik | 13 |
| NM_176952 | 6430573F11Rik | 13 |
| NM_176965 | Efcab5        | 13 |
| NM_177005 | Glt1d1        | 13 |
| NM_177225 | Samd12        | 13 |
| NM_177323 | Rint1         | 13 |
| NM_177337 | Arll1         | 13 |
| NM_177448 | Mogat2        | 13 |
| NM_177449 | Lrrc29        | 13 |
| NM_177638 | Crb3          | 13 |
| NM_177691 | Ppm1n         | 13 |
| NM_177697 | Vwa3a         | 13 |
| NM_178376 | Rraga         | 13 |
| NM_178391 | Setmar        | 13 |
| NM_178394 | Jakmipl       | 13 |
| NM_178785 | Rasal3        | 13 |
| NM_180588 | Reep4         | 13 |
| NM_181061 | Cenpk         | 13 |
| NM_181066 | Baat1         | 13 |
| NM_181548 | Eras          | 13 |
| NM_181821 | Hcfc1r1       | 13 |



|              |               |    |
|--------------|---------------|----|
| NM_182991    | Tmem591       | 13 |
| NM_183015    | Ccnb3         | 13 |
| NM_183022    | Accn4         | 13 |
| NM_183168    | P2ry6         | 13 |
| NM_183194    | Gsdmc3        | 13 |
| NM_183259    | 2210020M01Rik | 13 |
| NM_198021    | Scyl2         | 13 |
| NM_198026    | Iqcc          | 13 |
| NM_198113    | Ssh3          | 13 |
| NM_198304    | Nup188        | 13 |
| NM_198666    | Gm9758        | 13 |
| NM_198864    | Slitrk3       | 13 |
| NM_199471    | Prss43        | 13 |
| NM_201258    | Oog3          | 13 |
| NM_201359    | Tmem106c      | 13 |
| NM_205822    | Omt2b         | 13 |
| NM_207204    | Nin1          | 13 |
| NM_207209    | Sec24b        | 13 |
| NM_207216    | Ugt3a1        | 13 |
| NM_207219    | AI314976      | 13 |
| NM_207270    | Ptprh         | 13 |
| NR_015532    | 1700108J01Rik | 13 |
| NR_026924    | 1700020N18Rik | 13 |
| NR_027810    | 1110006024Rik | 13 |
| NR_033515    | Cyp2d37-ps    | 13 |
| NR_033585    | Cyp4f41-ps    | 13 |
| NR_033643    | Gm6642        | 13 |
| NR_038039    | 1700023F02Rik | 13 |
| NM_001001565 | Chpf          | 12 |
| NM_001001882 | Rtel1         | 12 |
| NM_001001892 | H2-K1         | 12 |
| NM_001004159 | Clec4b2       | 12 |
| NM_001004468 | Tacc2         | 12 |
| NM_001007077 | Gm13023       | 12 |
| NM_001012310 | Slc25a47      | 12 |
| NM_001013377 | E130306D19Rik | 12 |
| NM_001013771 | Gm973         | 12 |
| NM_001024954 | Pbx4          | 12 |
| NM_001025371 | Serinc4       | 12 |
| NM_001030290 | Rdh8          | 12 |
| NM_001033132 | Commd6        | 12 |
| NM_001033244 | Fancd2        | 12 |
| NM_001033250 | Lemd1         | 12 |
| NM_001033409 | Lgr6          | 12 |
| NM_001033418 | Bsph1         | 12 |
| NM_001034876 | Ccdc24        | 12 |
| NM_001037716 | Gm10439       | 12 |
| NM_001038010 | Kat2a         | 12 |
| NM_001038653 | Slc16a3       | 12 |
| NM_001039048 | Trim63        | 12 |
| NM_001039175 | Elovl1        | 12 |
| NM_001039502 | Krtap1-4      | 12 |
| NM_001039594 | Lce3a         | 12 |
| NM_001039684 | Mks1          | 12 |

|              |               |    |
|--------------|---------------|----|
| NM_001040700 | BC051019      | 12 |
| NM_001043228 | Dntt          | 12 |
| NM_001045489 | Mfge8         | 12 |
| NM_001076790 | Serpinb6d     | 12 |
| NM_001077189 | Fcgr2b        | 12 |
| NM_001077638 | Prmt2         | 12 |
| NM_001080995 | 4632434I11Rik | 12 |
| NM_001081040 | Coq10a        | 12 |
| NM_001081052 | Nhs           | 12 |
| NM_001081185 | Flnc          | 12 |
| NM_001081266 | Ccdc142       | 12 |
| NM_001081268 | Prss53        | 12 |
| NM_001081280 | Nlrc3         | 12 |
| NM_001081316 | Dsel          | 12 |
| NM_001081349 | Slc43a1       | 12 |
| NM_001081423 | Tt115         | 12 |
| NM_001081428 | Fam184a       | 12 |
| NM_001081459 | Sh2b1         | 12 |
| NM_001081490 | Fbxo9         | 12 |
| NM_001097980 | Gm16390       | 12 |
| NM_001099323 | Zkscan16      | 12 |
| NM_001100186 | Zscan4d       | 12 |
| NM_001100446 | Gm4297        | 12 |
| NM_001101507 | Clec21        | 12 |
| NM_001105159 | Cyp3a41b      | 12 |
| NM_001110513 | Ebf4          | 12 |
| NM_001111314 | Ngef          | 12 |
| NM_001113350 | Xkr5          | 12 |
| NM_001113549 | Ltbp4         | 12 |
| NM_001122765 | Sirt2         | 12 |
| NM_001122895 | Nab2          | 12 |
| NM_001127324 | Erccl         | 12 |
| NM_001145884 | Itgb5         | 12 |
| NM_001159513 | H2afy         | 12 |
| NM_001159624 | Rnpep         | 12 |
| NM_001161624 | Cdkn1c        | 12 |
| NM_001161730 | Tap1          | 12 |
| NM_001161746 | Tnfrsf12a     | 12 |
| NM_001161773 | 4930544G11Rik | 12 |
| NM_001161851 | Fbxo44        | 12 |
| NM_001162538 | Odf21         | 12 |
| NM_001163027 | Hcrtr1        | 12 |
| NM_001163218 | Pr13c1        | 12 |
| NM_001163470 | Trafd1        | 12 |
| NM_001163529 | Adam33        | 12 |
| NM_001163627 | Fam151b       | 12 |
| NM_001165989 | Ckap5         | 12 |
| NM_001166213 | Fam129c       | 12 |
| NM_001173505 | Thpo          | 12 |
| NM_001177584 | Esp8          | 12 |
| NM_001190443 | Abcf2         | 12 |
| NM_001190461 | 2310016C08Rik | 12 |
| NM_001198841 | Csrp3         | 12 |
| NM_001199334 | Gm10229       | 12 |

|              |               |    |
|--------------|---------------|----|
| NM_001199351 | Pnck          | 12 |
| NM_001199593 | Pkn1          | 12 |
| NM_001199996 | 4933402E13Rik | 12 |
| NM_001205037 | Gm11544       | 12 |
| NM_001205049 | Acr           | 12 |
| NM_001205311 | Slc12a3       | 12 |
| NM_007379    | Abca2         | 12 |
| NM_007390    | Chrna7        | 12 |
| NM_007433    | Alpl2         | 12 |
| NM_007558    | Bmp8a         | 12 |
| NM_007606    | Car3          | 12 |
| NM_007639    | Cd1d1         | 12 |
| NM_007662    | Cdh15         | 12 |
| NM_007714    | Clk4          | 12 |
| NM_007719    | Ccr7          | 12 |
| NM_007723    | Cnga1         | 12 |
| NM_007815    | Cyp2c29       | 12 |
| NM_008014    | Ppm1g         | 12 |
| NM_008080    | B4galnt1      | 12 |
| NM_008188    | Thumpd3       | 12 |
| NM_008227    | Hcn3          | 12 |
| NM_008329    | Ifi204        | 12 |
| NM_008357    | I115          | 12 |
| NM_008477    | Ktn1          | 12 |
| NM_008655    | Gadd45b       | 12 |
| NM_008722    | Npm1          | 12 |
| NM_009033    | Rbmxrt        | 12 |
| NM_009046    | Relb          | 12 |
| NM_009084    | Rpl37a        | 12 |
| NM_009131    | Clec11a       | 12 |
| NM_009173    | Siah1b        | 12 |
| NM_009237    | Sox3          | 12 |
| NM_009243    | Serpina1a     | 12 |
| NM_009404    | Tnfsf9        | 12 |
| NM_009462    | Usp10         | 12 |
| NM_009467    | Ugt2b5        | 12 |
| NM_009869    | Cdh9          | 12 |
| NM_009970    | Csf2ra        | 12 |
| NM_010018    | Dao           | 12 |
| NM_010060    | Dnahc11       | 12 |
| NM_010071    | Dok2          | 12 |
| NM_010112    | Efs           | 12 |
| NM_010188    | Fcgr3         | 12 |
| NM_010231    | Fmo1          | 12 |
| NM_010235    | Fosl1         | 12 |
| NM_010280    | Gfra3         | 12 |
| NM_010292    | Gck           | 12 |
| NM_010324    | Got1          | 12 |
| NM_010406    | Hc            | 12 |
| NM_010422    | Hexb          | 12 |
| NM_010477    | Hspd1         | 12 |
| NM_010516    | Cyr61         | 12 |
| NM_010556    | I13           | 12 |
| NM_010730    | Anxa1         | 12 |

|           |            |    |
|-----------|------------|----|
| NM_010742 | Ly6d       | 12 |
| NM_010752 | Mad111     | 12 |
| NM_010758 | Mag        | 12 |
| NM_010780 | Cma1       | 12 |
| NM_010817 | Psmc7      | 12 |
| NM_010877 | Ncf2       | 12 |
| NM_010923 | Nnat       | 12 |
| NM_010927 | Nos2       | 12 |
| NM_010933 | Nppc       | 12 |
| NM_011072 | Pfn1       | 12 |
| NM_011097 | Pitx1      | 12 |
| NM_011103 | Prked      | 12 |
| NM_011260 | Reg3g      | 12 |
| NM_011290 | Rpl6       | 12 |
| NM_011330 | Ccl11      | 12 |
| NM_011371 | St6galnac1 | 12 |
| NM_011471 | Sprp2e     | 12 |
| NM_011482 | Nhp211     | 12 |
| NM_011545 | Tcf21      | 12 |
| NM_011571 | Tesk1      | 12 |
| NM_011773 | Slc30a3    | 12 |
| NM_011843 | Esy1       | 12 |
| NM_011962 | Plod3      | 12 |
| NM_011987 | Pla2g10    | 12 |
| NM_013491 | Clcn1      | 12 |
| NM_013562 | Ifrd1      | 12 |
| NM_013611 | Nodal      | 12 |
| NM_013641 | Ptger1     | 12 |
| NM_013664 | Sh3gl1     | 12 |
| NM_013768 | Prmt5      | 12 |
| NM_013772 | Tcl1b3     | 12 |
| NM_013782 | Ptdss2     | 12 |
| NM_013786 | Hsd17b6    | 12 |
| NM_013807 | Plk3       | 12 |
| NM_015759 | Fgd3       | 12 |
| NM_016692 | Incenp     | 12 |
| NM_016798 | Pdlim3     | 12 |
| NM_016875 | Ybx2       | 12 |
| NM_016897 | Timm23     | 12 |
| NM_016918 | Nudt5      | 12 |
| NM_017396 | Cyp3a41a   | 12 |
| NM_018773 | Skap2      | 12 |
| NM_018813 | Cpsf3      | 12 |
| NM_019404 | Avpr2      | 12 |
| NM_019518 | Grasp      | 12 |
| NM_019519 | Rabggta    | 12 |
| NM_019521 | Gas6       | 12 |
| NM_019675 | Stmn4      | 12 |
| NM_019704 | Tmem115    | 12 |
| NM_019778 | Zbtb20     | 12 |
| NM_019805 | Anapc7     | 12 |
| NM_019946 | Mgst1      | 12 |
| NM_019966 | Mlycd      | 12 |
| NM_019979 | Selk       | 12 |

|           |               |    |
|-----------|---------------|----|
| NM_021272 | Fabp7         | 12 |
| NM_021405 | Cst10         | 12 |
| NM_021427 | Fam181b       | 12 |
| NM_021886 | Cenph         | 12 |
| NM_022656 | Nisch         | 12 |
| NM_022979 | Nup98         | 12 |
| NM_023060 | Eefsec        | 12 |
| NM_023239 | Ndn12         | 12 |
| NM_023402 | My112b        | 12 |
| NM_023463 | Ly6g6c        | 12 |
| NM_023464 | Ssna1         | 12 |
| NM_023865 | 9530002B09Rik | 12 |
| NM_024173 | Atp6v1g1      | 12 |
| NM_024199 | Cstf1         | 12 |
| NM_024206 | Sec13         | 12 |
| NM_025319 | 0610009B22Rik | 12 |
| NM_025331 | Gng11         | 12 |
| NM_025404 | Arl4d         | 12 |
| NM_025535 | Sar1b         | 12 |
| NM_025573 | Srsf9         | 12 |
| NM_025602 | Ccdc59        | 12 |
| NM_025658 | Ms4a4d        | 12 |
| NM_025837 | Mpi           | 12 |
| NM_025849 | 3110001D03Rik | 12 |
| NM_025947 | Dynlrb1       | 12 |
| NM_025959 | Psmc6         | 12 |
| NM_025995 | Fbxo5         | 12 |
| NM_026024 | Ube2t         | 12 |
| NM_026091 | 1700037H04Rik | 12 |
| NM_026101 | Herc4         | 12 |
| NM_026124 | 1110008F13Rik | 12 |
| NM_026301 | Rnf125        | 12 |
| NM_026414 | Asprv1        | 12 |
| NM_026433 | Tmem100       | 12 |
| NM_026570 | Yeats4        | 12 |
| NM_026651 | Pomgnt1       | 12 |
| NM_026677 | Rab13         | 12 |
| NM_026816 | Gtf2f2        | 12 |
| NM_026855 | Arv1          | 12 |
| NM_026906 | Cts3          | 12 |
| NM_026951 | Pex11c        | 12 |
| NM_026956 | Cd209f        | 12 |
| NM_027137 | Lce1d         | 12 |
| NM_027147 | Enho          | 12 |
| NM_027152 | Cd16412       | 12 |
| NM_027410 | Tecpr1        | 12 |
| NM_027518 | Gpr137c       | 12 |
| NM_027622 | Tex19.2       | 12 |
| NM_027725 | Wdr69         | 12 |
| NM_027763 | Trem11        | 12 |
| NM_027859 | Rnf215        | 12 |
| NM_027912 | Tysnd1        | 12 |
| NM_027949 | Phf7          | 12 |
| NM_028226 | Rbm12b        | 12 |

|           |               |    |
|-----------|---------------|----|
| NM_028279 | Naalad2       | 12 |
| NM_028287 | Zufsp         | 12 |
| NM_028377 | 2900006K08Rik | 12 |
| NM_028411 | Tmem138       | 12 |
| NM_028416 | Kremen2       | 12 |
| NM_028419 | Glr5          | 12 |
| NM_028665 | Ankrd42       | 12 |
| NM_028772 | Dmgdh         | 12 |
| NM_028863 | Isca2         | 12 |
| NM_028878 | Slc6a19       | 12 |
| NM_028992 | Gsdmc4        | 12 |
| NM_029004 | Rasgef1c      | 12 |
| NM_029067 | Spata17       | 12 |
| NM_029163 | Usp50         | 12 |
| NM_029186 | Tmem180       | 12 |
| NM_029320 | Pibf1         | 12 |
| NM_029366 | 2810422J05Rik | 12 |
| NM_029383 | Cldn22        | 12 |
| NM_029427 | Pnpla5        | 12 |
| NM_029497 | Urb1          | 12 |
| NM_029509 | Gbp8          | 12 |
| NM_029586 | Ccdc46        | 12 |
| NM_029609 | Lhpp          | 12 |
| NM_029646 | I134          | 12 |
| NM_029943 | Apex2         | 12 |
| NM_030033 | Crisp4        | 12 |
| NM_030064 | Phf23         | 12 |
| NM_030153 | Naa35         | 12 |
| NM_030252 | BC003266      | 12 |
| NM_030738 | Vmn1r65       | 12 |
| NM_031870 | Msh4          | 12 |
| NM_031873 | Tasl1r2       | 12 |
| NM_033037 | Cdo1          | 12 |
| NM_053082 | Tspan4        | 12 |
| NM_053164 | Mrpl43        | 12 |
| NM_053183 | Ddx50         | 12 |
| NM_130856 | Krtap16-8     | 12 |
| NM_130884 | Idh3b         | 12 |
| NM_133211 | Tlr7          | 12 |
| NM_133216 | Xpnpep1       | 12 |
| NM_133661 | Slc6a12       | 12 |
| NM_133667 | Pdk2          | 12 |
| NM_133676 | Osgep         | 12 |
| NM_133706 | Tmem97        | 12 |
| NM_133719 | Metrn         | 12 |
| NM_133776 | Gpr110        | 12 |
| NM_133837 | Cdc123        | 12 |
| NM_134063 | BC016423      | 12 |
| NM_138583 | D16H22S680E   | 12 |
| NM_138757 | 4933424B01Rik | 12 |
| NM_144548 | I123r         | 12 |
| NM_144559 | Fcgr4         | 12 |
| NM_144796 | Susd4         | 12 |
| NM_144893 | Slc35c2       | 12 |

|           |               |    |
|-----------|---------------|----|
| NM_144917 | Elmod3        | 12 |
| NM_145153 | Oas1f         | 12 |
| NM_145210 | Oas1e         | 12 |
| NM_145362 | Alg1          | 12 |
| NM_145394 | Slc44a3       | 12 |
| NM_145531 | Spg11         | 12 |
| NM_145539 | Tm4sf4        | 12 |
| NM_145592 | Dkk4          | 12 |
| NM_145632 | Polr2h        | 12 |
| NM_145998 | Hmx2          | 12 |
| NM_146000 | Bud13         | 12 |
| NM_146026 | Prr151        | 12 |
| NM_146041 | Gmds          | 12 |
| NM_146063 | Krt79         | 12 |
| NM_146125 | Itpka         | 12 |
| NM_146179 | Zfp418        | 12 |
| NM_146231 | Zfp825        | 12 |
| NM_146844 | Olfr1107      | 12 |
| NM_147221 | Glis1         | 12 |
| NM_148940 | Prss44        | 12 |
| NM_153099 | Prss42        | 12 |
| NM_153104 | Phosphol      | 12 |
| NM_153142 | Slc35e4       | 12 |
| NM_153170 | Slc36a2       | 12 |
| NM_153518 | Ccdc65        | 12 |
| NM_153548 | E430025E21Rik | 12 |
| NM_153559 | Qsox2         | 12 |
| NM_172125 | Adamlb        | 12 |
| NM_172203 | Nox1          | 12 |
| NM_172285 | Plcg2         | 12 |
| NM_172776 | D630002G06Rik | 12 |
| NM_172876 | Gpatch3       | 12 |
| NM_172923 | AI118078      | 12 |
| NM_173767 | Insc          | 12 |
| NM_173773 | Oog4          | 12 |
| NM_174988 | Cdh22         | 12 |
| NM_175112 | Rae1          | 12 |
| NM_175151 | Tatdn1        | 12 |
| NM_175198 | Prox2         | 12 |
| NM_175513 | Zfp804a       | 12 |
| NM_175528 | E330009J07Rik | 12 |
| NM_177322 | Agtr1a        | 12 |
| NM_177380 | Cyp3a44       | 12 |
| NM_177642 | Igfn1         | 12 |
| NM_177653 | F830045P16Rik | 12 |
| NM_177667 | Ttc22         | 12 |
| NM_177682 | Ccz1          | 12 |
| NM_177773 | 4933408B17Rik | 12 |
| NM_177834 | Cpa6          | 12 |
| NM_177856 | E130311K13Rik | 12 |
| NM_178020 | Hyal3         | 12 |
| NM_178381 | Ano9          | 12 |
| NM_178674 | Fbxl21        | 12 |
| NM_178702 | Radil         | 12 |

|              |               |    |
|--------------|---------------|----|
| NM_178848    | Sirt5         | 12 |
| NM_178900    | Prkd2         | 12 |
| NM_181072    | Myo1e         | 12 |
| NM_181586    | Sirt6         | 12 |
| NM_182957    | Gm17019       | 12 |
| NM_183189    | Krtap13-1     | 12 |
| NM_183270    | Chchd8        | 12 |
| NM_183297    | Nxph4         | 12 |
| NM_183426    | Sbno2         | 12 |
| NM_197944    | Hsh2d         | 12 |
| NM_198224    | Ms4a13        | 12 |
| NM_198408    | Crhbp         | 12 |
| NM_198610    | Igsf21        | 12 |
| NM_198656    | Cdh26         | 12 |
| NM_199195    | Bckdhb        | 12 |
| NM_201357    | Tssc1         | 12 |
| NM_201362    | Ccdc68        | 12 |
| NM_201406    | Pigs          | 12 |
| NM_207207    | Mrps26        | 12 |
| NM_207212    | Wtip          | 12 |
| NM_213733    | Npepl1        | 12 |
| NR_015351    | Ipw           | 12 |
| NR_026798    | Zfp389        | 12 |
| NR_027899    | 1700109F18Rik | 12 |
| NR_028023    | Gm4566        | 12 |
| NR_028124    | 2310068J16Rik | 12 |
| NR_033604    | Gm4971        | 12 |
| NR_036593    | 1700121N20Rik | 12 |
| NM_001003685 | Ghrhr         | 11 |
| NM_001003920 | Brsk1         | 11 |
| NM_001004152 | Psg22         | 11 |
| NM_001005846 | Mcoln2        | 11 |
| NM_001007580 | Fndc3c1       | 11 |
| NM_001008498 | Wdr34         | 11 |
| NM_001013366 | Wdr91         | 11 |
| NM_001013414 | Neurl4        | 11 |
| NM_001024699 | Zbtb45        | 11 |
| NM_001033039 | Klhdc9        | 11 |
| NM_001033231 | Fam195b       | 11 |
| NM_001033281 | Prdm6         | 11 |
| NM_001033412 | Gm829         | 11 |
| NM_001033450 | Mnda          | 11 |
| NM_001033768 | Pin1-ps1      | 11 |
| NM_001033872 | Smagp         | 11 |
| NM_001034862 | Erich1        | 11 |
| NM_001037744 | Timm8a2       | 11 |
| NM_001037842 | Cml3          | 11 |
| NM_001037865 | Col28a1       | 11 |
| NM_001037957 | Dyrk1b        | 11 |
| NM_001042556 | Rpf2          | 11 |
| NM_001042630 | Lcn5          | 11 |
| NM_001045959 | Mink1         | 11 |
| NM_001081065 | Zfp707        | 11 |
| NM_001081139 | Ankrd35       | 11 |



|              |               |    |
|--------------|---------------|----|
| NM_001081168 | Sap301        | 11 |
| NM_001081184 | BC057079      | 11 |
| NM_001081493 | Cartpt        | 11 |
| NM_001082535 | 4933407P14Rik | 11 |
| NM_001085520 | Gm12789       | 11 |
| NM_001085548 | Krtap4-9      | 11 |
| NM_001097977 | Gm14151       | 11 |
| NM_001099318 | Rhox2c        | 11 |
| NM_001099644 | Htr3a         | 11 |
| NM_001102650 | Nt5c31        | 11 |
| NM_001105160 | Cyp3a59       | 11 |
| NM_001110159 | Nxt1          | 11 |
| NM_001113323 | Glb113        | 11 |
| NM_001113406 | Krtap11-1     | 11 |
| NM_001122851 | Faim          | 11 |
| NM_001126320 | Gm11563       | 11 |
| NM_001126322 | Gm11595       | 11 |
| NM_001127318 | Gucy2c        | 11 |
| NM_001135172 | Clqtnf7       | 11 |
| NM_001136063 | Gfra4         | 11 |
| NM_001136071 | Lsp1          | 11 |
| NM_001141965 | Naa20         | 11 |
| NM_001142357 | Alg12         | 11 |
| NM_001145433 | 1810013D10Rik | 11 |
| NM_001145953 | Lgals3        | 11 |
| NM_001145978 | Parp4         | 11 |
| NM_001146211 | Mrps10        | 11 |
| NM_001159301 | Lgals9        | 11 |
| NM_001159410 | Guk1          | 11 |
| NM_001159538 | Fgd2          | 11 |
| NM_001160043 | Dem1          | 11 |
| NM_001160145 | Tmem9         | 11 |
| NM_001161621 | Abp1          | 11 |
| NM_001162475 | Stra6         | 11 |
| NM_001162506 | Troap         | 11 |
| NM_001162540 | Stk32c        | 11 |
| NM_001163029 | Cd97          | 11 |
| NM_001163131 | Elf3          | 11 |
| NM_001163452 | Trpc4ap       | 11 |
| NM_001163510 | Kcnn4         | 11 |
| NM_001163571 | Senp3         | 11 |
| NM_001163637 | Jakmip2       | 11 |
| NM_001163709 | Bri3          | 11 |
| NM_001163791 | Orc6          | 11 |
| NM_001164047 | Mb            | 11 |
| NM_001164220 | Trim13        | 11 |
| NM_001164625 | 2210021J22Rik | 11 |
| NM_001164790 | Scg3          | 11 |
| NM_001165919 | 1700123I01Rik | 11 |
| NM_001166273 | Cspg5         | 11 |
| NM_001166397 | Armex2        | 11 |
| NM_001166413 | Arhgef25      | 11 |
| NM_001166416 | Med23         | 11 |
| NM_001166557 | Abca6         | 11 |

|              |               |    |
|--------------|---------------|----|
| NM_001166642 | Bcas3         | 11 |
| NM_001167586 | Gm7257        | 11 |
| NM_001167669 | Spag7         | 11 |
| NM_001167705 | Serpina3a     | 11 |
| NM_001167997 | Tex11         | 11 |
| NM_001168590 | 2010106E10Rik | 11 |
| NM_001172154 | Dnase111      | 11 |
| NM_001172424 | Dhrs3         | 11 |
| NM_001177416 | Gm6792        | 11 |
| NM_001177438 | Aldh3b2       | 11 |
| NM_001190869 | Kcne3         | 11 |
| NM_001195681 | Gm684         | 11 |
| NM_001195726 | Fam181a       | 11 |
| NM_001198835 | Coch          | 11 |
| NM_001201389 | LOC100504710  | 11 |
| NM_007410    | Adh5          | 11 |
| NM_007467    | Aplp1         | 11 |
| NM_007526    | Barx1         | 11 |
| NM_007574    | Clqc          | 11 |
| NM_007587    | Calca         | 11 |
| NM_007627    | Cckbr         | 11 |
| NM_007657    | Cd9           | 11 |
| NM_007750    | Cox8a         | 11 |
| NM_007769    | Dmbt1         | 11 |
| NM_007804    | Cux2          | 11 |
| NM_007902    | Edn2          | 11 |
| NM_007997    | Fdxr          | 11 |
| NM_008059    | G0s2          | 11 |
| NM_008168    | Grik5         | 11 |
| NM_008175    | Grn           | 11 |
| NM_008179    | Gspt2         | 11 |
| NM_008183    | Gstm2         | 11 |
| NM_008223    | Serpind1      | 11 |
| NM_008339    | Cd79b         | 11 |
| NM_008427    | Kcnj4         | 11 |
| NM_008510    | Xcl1          | 11 |
| NM_008535    | Lyl1          | 11 |
| NM_008784    | Igbp1         | 11 |
| NM_008851    | Pitpnm1       | 11 |
| NM_008874    | Plcb3         | 11 |
| NM_009085    | Polr1c        | 11 |
| NM_009133    | Stmn3         | 11 |
| NM_009201    | Slc1a5        | 11 |
| NM_009292    | Stra8         | 11 |
| NM_009319    | Tarbp2        | 11 |
| NM_009330    | Hnflb         | 11 |
| NM_009341    | Tcp10c        | 11 |
| NM_009417    | Tpo           | 11 |
| NM_009426    | Trh           | 11 |
| NM_009439    | Psmd3         | 11 |
| NM_009627    | Adm           | 11 |
| NM_009693    | Apob          | 11 |
| NM_009747    | Bdkrb2        | 11 |
| NM_009775    | Tspo          | 11 |

|           |         |    |
|-----------|---------|----|
| NM_009910 | Cxcr3   | 11 |
| NM_009943 | Cox6a2  | 11 |
| NM_010001 | Cyp2c37 | 11 |
| NM_010012 | Cyp8b1  | 11 |
| NM_010094 | Lefty1  | 11 |
| NM_010158 | Khdrbs3 | 11 |
| NM_010229 | Flt3    | 11 |
| NM_010397 | H2-T22  | 11 |
| NM_010399 | H2-T9   | 11 |
| NM_010416 | Hemt1   | 11 |
| NM_010420 | Hesx1   | 11 |
| NM_010436 | H2afx   | 11 |
| NM_010483 | Htr5b   | 11 |
| NM_010511 | Ifngr1  | 11 |
| NM_010680 | Lama3   | 11 |
| NM_010903 | Nfe213  | 11 |
| NM_011070 | Pfdn2   | 11 |
| NM_011099 | Pkm2    | 11 |
| NM_011113 | Plaur   | 11 |
| NM_011168 | Pr17a2  | 11 |
| NM_011206 | Ptpn18  | 11 |
| NM_011281 | Rorc    | 11 |
| NM_011364 | Sh2d1a  | 11 |
| NM_011470 | Sprr2d  | 11 |
| NM_011472 | Sprr2f  | 11 |
| NM_011701 | Vim     | 11 |
| NM_011729 | Ercc5   | 11 |
| NM_011781 | Adam25  | 11 |
| NM_011865 | Pcbp1   | 11 |
| NM_011975 | Rpl27a  | 11 |
| NM_012042 | Cull1   | 11 |
| NM_013487 | Cd3d    | 11 |
| NM_013654 | Ccl7    | 11 |
| NM_013667 | Slc22a2 | 11 |
| NM_013707 | Krtap14 | 11 |
| NM_013715 | Cops5   | 11 |
| NM_013742 | Cars    | 11 |
| NM_013809 | Cyp2g1  | 11 |
| NM_013908 | Fbxw5   | 11 |
| NM_015766 | Ebi3    | 11 |
| NM_015825 | Sh3bgr  | 11 |
| NM_016669 | Crym    | 11 |
| NM_016908 | Syt5    | 11 |
| NM_018771 | Gipc1   | 11 |
| NM_018786 | Prpf40b | 11 |
| NM_019393 | Exosc9  | 11 |
| NM_019432 | Tmem37  | 11 |
| NM_019456 | Apbb1ip | 11 |
| NM_019674 | Ppp4c   | 11 |
| NM_019687 | Slc22a4 | 11 |
| NM_019725 | Tle2    | 11 |
| NM_019740 | Foxo3   | 11 |
| NM_019967 | Dbc1    | 11 |
| NM_020594 | Zc3h8   | 11 |

|           |               |    |
|-----------|---------------|----|
| NM_021287 | Spnb3         | 11 |
| NM_021788 | Sap30         | 11 |
| NM_022011 | Gtf2h2        | 11 |
| NM_022017 | Trpv4         | 11 |
| NM_022331 | Herpud1       | 11 |
| NM_022888 | Folr4         | 11 |
| NM_023260 | Mrps34        | 11 |
| NM_023279 | Tubb3         | 11 |
| NM_023292 | Pus3          | 11 |
| NM_023773 | Mphosph8      | 11 |
| NM_024170 | Cxx1a         | 11 |
| NM_024179 | 0610009020Rik | 11 |
| NM_024286 | Popdc3        | 11 |
| NM_025295 | Btd           | 11 |
| NM_025344 | Eif3f         | 11 |
| NM_025437 | Eif1ax        | 11 |
| NM_025448 | Ssr2          | 11 |
| NM_025471 | 1810030N24Rik | 11 |
| NM_025524 | Krtap3-3      | 11 |
| NM_025606 | Mrpl16        | 11 |
| NM_025615 | 2810004N23Rik | 11 |
| NM_025655 | Tmigd1        | 11 |
| NM_025687 | Tex12         | 11 |
| NM_025851 | 1700010I14Rik | 11 |
| NM_025860 | Ddx18         | 11 |
| NM_025892 | 1500031L02Rik | 11 |
| NM_025903 | Ifrd2         | 11 |
| NM_025922 | Itpa          | 11 |
| NM_025939 | Paics         | 11 |
| NM_025969 | 1700034H14Rik | 11 |
| NM_026014 | Cdt1          | 11 |
| NM_026115 | Hat1          | 11 |
| NM_026122 | Hmgn3         | 11 |
| NM_026152 | Hogal         | 11 |
| NM_026189 | Eepd1         | 11 |
| NM_026231 | Gsted         | 11 |
| NM_026261 | Ubl4b         | 11 |
| NM_026315 | 1700011L22Rik | 11 |
| NM_026318 | 2310003F16Rik | 11 |
| NM_026357 | Ribc2         | 11 |
| NM_026421 | Enoph1        | 11 |
| NM_026500 | Ddx59         | 11 |
| NM_026542 | Slc25a39      | 11 |
| NM_026632 | Rpa3          | 11 |
| NM_026636 | 5430437P03Rik | 11 |
| NM_026664 | Vps53         | 11 |
| NM_026670 | Zmym1         | 11 |
| NM_026738 | 1110007C09Rik | 11 |
| NM_026760 | 2310036022Rik | 11 |
| NM_026778 | Cthrc1        | 11 |
| NM_026811 | Lcele         | 11 |
| NM_026880 | Pink1         | 11 |
| NM_026909 | Thap7         | 11 |
| NM_027042 | Lelpl         | 11 |

|           |               |    |
|-----------|---------------|----|
| NM_027105 | Krtap26-1     | 11 |
| NM_027129 | 2310035K24Rik | 11 |
| NM_027194 | Tm2d2         | 11 |
| NM_027212 | Med30         | 11 |
| NM_027227 | Glod5         | 11 |
| NM_027241 | Polr3gl       | 11 |
| NM_027248 | Zfp219        | 11 |
| NM_027404 | Bag5          | 11 |
| NM_027430 | Brp44         | 11 |
| NM_027564 | 4921507P07Rik | 11 |
| NM_027597 | Fam71d        | 11 |
| NM_027599 | Lpcat2b       | 11 |
| NM_027609 | Speer4f       | 11 |
| NM_027633 | 4931417G12Rik | 11 |
| NM_027732 | Dmrtd2        | 11 |
| NM_027759 | Fsipl         | 11 |
| NM_027882 | Cic           | 11 |
| NM_027905 | 1300018J18Rik | 11 |
| NM_028096 | 2010300C02Rik | 11 |
| NM_028128 | Rfc5          | 11 |
| NM_028440 | 3110003A17Rik | 11 |
| NM_028443 | Fam101a       | 11 |
| NM_028654 | 4930404H21Rik | 11 |
| NM_028660 | Klk9          | 11 |
| NM_028662 | Slc35b2       | 11 |
| NM_029019 | Stard6        | 11 |
| NM_029049 | Ptchd3        | 11 |
| NM_029173 | Nxn12         | 11 |
| NM_029247 | 4930550C14Rik | 11 |
| NM_029389 | Fam35a        | 11 |
| NM_029430 | Ttc231        | 11 |
| NM_029734 | Wdyhv1        | 11 |
| NM_030080 | Creb3l4       | 11 |
| NM_030239 | Abcg3         | 11 |
| NM_030717 | Lactb         | 11 |
| NM_031178 | Tlr9          | 11 |
| NM_031250 | Ucn3          | 11 |
| NM_031373 | Ogfr          | 11 |
| NM_031375 | Ngrn          | 11 |
| NM_033603 | Amn           | 11 |
| NM_053137 | Pcdhb12       | 11 |
| NM_053146 | Pcdhb21       | 11 |
| NM_053157 | Tm2d1         | 11 |
| NM_053161 | Mrpl27        | 11 |
| NM_053163 | Mrpl36        | 11 |
| NM_054084 | Calcb         | 11 |
| NM_080633 | Aco2          | 11 |
| NM_080844 | Serpinc1      | 11 |
| NM_133668 | Slc25a3       | 11 |
| NM_133779 | Pigt          | 11 |
| NM_133816 | Sh3bp4        | 11 |
| NM_133859 | Olfml3        | 11 |
| NM_133862 | Fgg           | 11 |
| NM_133941 | Dhx32         | 11 |

|           |               |    |
|-----------|---------------|----|
| NM_133979 | Ano10         | 11 |
| NM_134032 | Hoxb2         | 11 |
| NM_134090 | Kdelr3        | 11 |
| NM_134117 | Pkdcc         | 11 |
| NM_138607 | Fam50a        | 11 |
| NM_138654 | 5033411D12Rik | 11 |
| NM_144532 | Cabp4         | 11 |
| NM_144799 | Lmcd1         | 11 |
| NM_144822 | Cbaral        | 11 |
| NM_144857 | Rrp36         | 11 |
| NM_144885 | BC005624      | 11 |
| NM_144903 | Aldob         | 11 |
| NM_144936 | Tmem45b       | 11 |
| NM_145132 | Mchr1         | 11 |
| NM_145416 | Kril          | 11 |
| NM_145499 | Cyp2c70       | 11 |
| NM_145500 | Ubtd1         | 11 |
| NM_145537 | Edem2         | 11 |
| NM_145599 | Tmem184c      | 11 |
| NM_145709 | Obox5         | 11 |
| NM_145848 | Vmn1r71       | 11 |
| NM_145920 | Evc2          | 11 |
| NM_145940 | Wipil         | 11 |
| NM_145946 | Fanci         | 11 |
| NM_145974 | N4bp3         | 11 |
| NM_146039 | Wdr60         | 11 |
| NM_146141 | Ppa2          | 11 |
| NM_146150 | Nrd1          | 11 |
| NM_146208 | Neil3         | 11 |
| NM_146763 | Olfr1406      | 11 |
| NM_147778 | Commd3        | 11 |
| NM_152810 | Cdc5l         | 11 |
| NM_153057 | Nomol         | 11 |
| NM_153065 | Ddx27         | 11 |
| NM_153414 | Ints9         | 11 |
| NM_153504 | Rnf183        | 11 |
| NM_153534 | Adcy2         | 11 |
| NM_153568 | Lrrc66        | 11 |
| NM_153793 | Rel12         | 11 |
| NM_172154 | Lcor          | 11 |
| NM_172252 | Mrpl21        | 11 |
| NM_172256 | Dync2li1      | 11 |
| NM_172289 | Slc36a4       | 11 |
| NM_172290 | Ntm           | 11 |
| NM_172479 | Slc38a5       | 11 |
| NM_172796 | S1fn9         | 11 |
| NM_172834 | Loxhd1        | 11 |
| NM_172922 | Ankk1         | 11 |
| NM_172951 | Sntg2         | 11 |
| NM_173051 | Serpinblc     | 11 |
| NM_173433 | Kdm4d         | 11 |
| NM_173449 | 4921523A10Rik | 11 |
| NM_175176 | 4922501L14Rik | 11 |
| NM_175300 | Anapc2        | 11 |

|              |               |    |
|--------------|---------------|----|
| NM_175401    | Fbxw17        | 11 |
| NM_175418    | Mybpc1        | 11 |
| NM_175471    | Cyb5r1        | 11 |
| NM_175521    | 6430598A04Rik | 11 |
| NM_177409    | Tram2         | 11 |
| NM_177618    | Wscd1         | 11 |
| NM_177750    | Frmpd3        | 11 |
| NM_177898    | Nek5          | 11 |
| NM_177913    | A430089I19Rik | 11 |
| NM_178060    | Thra          | 11 |
| NM_178775    | Rps6kc1       | 11 |
| NM_181541    | Caprin2       | 11 |
| NM_183311    | Tmem145       | 11 |
| NM_197989    | Fam58b        | 11 |
| NM_198250    | Lrrc4b        | 11 |
| NM_198296    | 9130011E15Rik | 11 |
| NM_198634    | Tigd3         | 11 |
| NM_198854    | Dlx5          | 11 |
| NM_199422    | S100a7a       | 11 |
| NM_201255    | Krt9          | 11 |
| NM_201355    | Nat14         | 11 |
| NM_206535    | Cd200r2       | 11 |
| NM_207206    | Lpcat4        | 11 |
| NM_207258    | Fam71f1       | 11 |
| NM_207677    | Dedd2         | 11 |
| NR_015573    | 1700012D14Rik | 11 |
| NR_024068    | Snhg7         | 11 |
| NR_027699    | Serp2         | 11 |
| NR_027866    | 5730408K05Rik | 11 |
| NR_027943    | 1110038B12Rik | 11 |
| NR_028584    | Gm11213       | 11 |
| NR_033216    | 1700069L16Rik | 11 |
| NR_033483    | U90926        | 11 |
| NR_033628    | AA474331      | 11 |
| NM_001003668 | Krt83         | 10 |
| NM_001003951 | Ces5a         | 10 |
| NM_001004174 | AA467197      | 10 |
| NM_001004184 | Slc28a1       | 10 |
| NM_001005788 | Zfp69         | 10 |
| NM_001005860 | Clec4a4       | 10 |
| NM_001008791 | Whrn          | 10 |
| NM_001011684 | Nms           | 10 |
| NM_001014995 | Fam189b       | 10 |
| NM_001024145 | Pla2g4f       | 10 |
| NM_001024626 | Zfp873        | 10 |
| NM_001024922 | Ddx49         | 10 |
| NM_001025388 | Gm5506        | 10 |
| NM_001031667 | Gsk3a         | 10 |
| NM_001033161 | Tradd         | 10 |
| NM_001033211 | AU022751      | 10 |
| NM_001033243 | Ccdc114       | 10 |
| NM_001033280 | Gm94          | 10 |
| NM_001033338 | Rimbp3        | 10 |
| NM_001033367 | Nlrc4         | 10 |

|              |               |    |
|--------------|---------------|----|
| NM_001033471 | Cpxcr1        | 10 |
| NM_001033621 | Myot          | 10 |
| NM_001033779 | Gm5544        | 10 |
| NM_001033799 | 4930428D18Rik | 10 |
| NM_001034060 | Rufy4         | 10 |
| NM_001034906 | Trim43a       | 10 |
| NM_001037294 | Alpk2         | 10 |
| NM_001039114 | Acsbg2        | 10 |
| NM_001039121 | Defb43        | 10 |
| NM_001039218 | Spink14       | 10 |
| NM_001039507 | Lipe          | 10 |
| NM_001039544 | Mup3          | 10 |
| NM_001042655 | Tbc1d17       | 10 |
| NM_001045807 | Rbm15         | 10 |
| NM_001077184 | Bsg           | 10 |
| NM_001077713 | Acn9          | 10 |
| NM_001081078 | Lct           | 10 |
| NM_001081137 | Sis           | 10 |
| NM_001081246 | 1700017N19Rik | 10 |
| NM_001081399 | Prss33        | 10 |
| NM_001083938 | Rnaset2a      | 10 |
| NM_001085348 | Rhox2e        | 10 |
| NM_001085356 | Rhox2f        | 10 |
| NM_001085538 | Gm11757       | 10 |
| NM_001097978 | Gm11758       | 10 |
| NM_001098789 | Ndufa412      | 10 |
| NM_001099316 | Rhox2b        | 10 |
| NM_001100181 | Cyp4a32       | 10 |
| NM_001100465 | Rhox2h        | 10 |
| NM_001105252 | Tmc5          | 10 |
| NM_001109973 | Mdfi          | 10 |
| NM_001110242 | 1810043H04Rik | 10 |
| NM_001111065 | Reps1         | 10 |
| NM_001111118 | Rad51ap2      | 10 |
| NM_001111141 | Gm505         | 10 |
| NM_001113478 | Frrs1         | 10 |
| NM_001114116 | Syt3          | 10 |
| NM_001122739 | Inpp11        | 10 |
| NM_001128605 | Psen2         | 10 |
| NM_001129999 | Cep250        | 10 |
| NM_001134391 | Apobec1       | 10 |
| NM_001134644 | LOC100048885  | 10 |
| NM_001134660 | Prr23a        | 10 |
| NM_001145013 | Rfp14         | 10 |
| NM_001145034 | Gm13889       | 10 |
| NM_001145781 | Acbd6         | 10 |
| NM_001145800 | Igsf9         | 10 |
| NM_001146046 | Lrrc49        | 10 |
| NM_001146084 | Fastkd5       | 10 |
| NM_001159324 | Gaa           | 10 |
| NM_001159329 | Gtpbp8        | 10 |
| NM_001159389 | Rfx6          | 10 |
| NM_001159738 | Cc120         | 10 |
| NM_001160012 | Gjb3          | 10 |



|              |           |    |
|--------------|-----------|----|
| NM_001160353 | Grm2      | 10 |
| NM_001161722 | Tcfef     | 10 |
| NM_001162423 | Arhgap4   | 10 |
| NM_001162521 | Dguok     | 10 |
| NM_001163085 | Map3k15   | 10 |
| NM_001163467 | Phtf1     | 10 |
| NM_001163552 | Ap4b1     | 10 |
| NM_001163661 | Telo2     | 10 |
| NM_001164139 | Spert     | 10 |
| NM_001164204 | Tsen34    | 10 |
| NM_001164532 | Cpsf4l    | 10 |
| NM_001164827 | Zfyve19   | 10 |
| NM_001166547 | Eif4enif1 | 10 |
| NM_001167691 | Sirt4     | 10 |
| NM_001168256 | Tmem40    | 10 |
| NM_001168423 | Spink13   | 10 |
| NM_001170853 | Mndal     | 10 |
| NM_001172157 | Dis3l2    | 10 |
| NM_001177524 | Gm1       | 10 |
| NM_001177535 | Gm4340    | 10 |
| NM_001177542 | C87977    | 10 |
| NM_001177561 | Slc10a1   | 10 |
| NM_001177578 | Gm13871   | 10 |
| NM_001177667 | Spna2     | 10 |
| NM_001185164 | Vegfb     | 10 |
| NM_001190330 | Ces2a     | 10 |
| NM_001190448 | Ddc       | 10 |
| NM_001198866 | Dctn1     | 10 |
| NM_001198998 | Vdac3     | 10 |
| NM_001199217 | Slc38a3   | 10 |
| NM_001199293 | Tex14     | 10 |
| NM_001199337 | Apoo      | 10 |
| NM_001199431 | Dnmt1     | 10 |
| NM_007391    | Acrv1     | 10 |
| NM_007418    | Adra2c    | 10 |
| NM_007439    | Alk       | 10 |
| NM_007573    | Clqbp     | 10 |
| NM_007582    | Cacng1    | 10 |
| NM_007622    | Cbx1      | 10 |
| NM_007695    | Chi3l1    | 10 |
| NM_007875    | Dpagt1    | 10 |
| NM_007879    | Drg1      | 10 |
| NM_007889    | Dvl3      | 10 |
| NM_007953    | Esrra     | 10 |
| NM_008022    | Foxd4     | 10 |
| NM_008052    | Dtx1      | 10 |
| NM_008063    | Slc37a4   | 10 |
| NM_008148    | Gp5       | 10 |
| NM_008225    | Hcls1     | 10 |
| NM_008229    | Hdac2     | 10 |
| NM_008250    | Hlx       | 10 |
| NM_008293    | Hsd3b1    | 10 |
| NM_008376    | Gimap1    | 10 |
| NM_008393    | Irx3      | 10 |

|           |           |    |
|-----------|-----------|----|
| NM_008411 | Cuzd1     | 10 |
| NM_008458 | Serpina3c | 10 |
| NM_008463 | Klra5     | 10 |
| NM_008474 | Krt84     | 10 |
| NM_008512 | Lrp1      | 10 |
| NM_008530 | Ly6f      | 10 |
| NM_008557 | Fxyd3     | 10 |
| NM_008560 | Mc2r      | 10 |
| NM_008595 | Mfng      | 10 |
| NM_008628 | Msh2      | 10 |
| NM_008801 | Pde6d     | 10 |
| NM_008824 | Pfkfb1    | 10 |
| NM_008868 | Pla2g2c   | 10 |
| NM_008876 | Pld2      | 10 |
| NM_008919 | Ppyr1     | 10 |
| NM_008946 | Psmb6     | 10 |
| NM_009038 | Rcvrn     | 10 |
| NM_009096 | Rps6      | 10 |
| NM_009195 | Slc12a4   | 10 |
| NM_009265 | Sprrlb    | 10 |
| NM_009301 | Svs5      | 10 |
| NM_009321 | Tbca      | 10 |
| NM_009325 | Tbxa2r    | 10 |
| NM_009393 | Tnnc1     | 10 |
| NM_009431 | Ctr9      | 10 |
| NM_009473 | Nr1h2     | 10 |
| NM_009654 | Alb       | 10 |
| NM_009687 | Apex1     | 10 |
| NM_009694 | Apobec2   | 10 |
| NM_009699 | Aqp2      | 10 |
| NM_009701 | Aqp5      | 10 |
| NM_009706 | Arhgap5   | 10 |
| NM_009724 | Atp4b     | 10 |
| NM_009729 | Atp6v0c   | 10 |
| NM_009749 | Bex2      | 10 |
| NM_009802 | Car6      | 10 |
| NM_009850 | Cd3g      | 10 |
| NM_009870 | Cdk4      | 10 |
| NM_009896 | Socs1     | 10 |
| NM_009908 | Cmas      | 10 |
| NM_009977 | Cst7      | 10 |
| NM_009999 | Cyp2b10   | 10 |
| NM_010000 | Cyp2b9    | 10 |
| NM_010024 | Dct       | 10 |
| NM_010097 | Sparcl1   | 10 |
| NM_010130 | Emr1      | 10 |
| NM_010147 | Epn1      | 10 |
| NM_010156 | Samd9l    | 10 |
| NM_010293 | Gyk1l     | 10 |
| NM_010302 | Gna12     | 10 |
| NM_010444 | Nr4a1     | 10 |
| NM_010475 | Hsd17b1   | 10 |
| NM_010579 | Eif6      | 10 |
| NM_010592 | Jund      | 10 |

|           |          |    |
|-----------|----------|----|
| NM_010673 | Krtap6-2 | 10 |
| NM_010735 | Lta      | 10 |
| NM_010753 | Mxd4     | 10 |
| NM_010882 | Ndn      | 10 |
| NM_010904 | Nefh     | 10 |
| NM_011033 | Pabpc2   | 10 |
| NM_011300 | Rps7     | 10 |
| NM_011333 | Cc12     | 10 |
| NM_011351 | Sema6c   | 10 |
| NM_011432 | Snrpc    | 10 |
| NM_011475 | Sprrr2i  | 10 |
| NM_011528 | Taldo1   | 10 |
| NM_011590 | Timml7a  | 10 |
| NM_011723 | Xdh      | 10 |
| NM_011801 | Cfdp1    | 10 |
| NM_011834 | Aadat    | 10 |
| NM_011869 | Med24    | 10 |
| NM_011886 | Scamp3   | 10 |
| NM_011891 | Sgcd     | 10 |
| NM_011952 | Mapk3    | 10 |
| NM_011993 | Dpysl4   | 10 |
| NM_012007 | Ctsj     | 10 |
| NM_012031 | Spag1    | 10 |
| NM_013468 | Ankrd1   | 10 |
| NM_013496 | Crabp1   | 10 |
| NM_013530 | Gnb3     | 10 |
| NM_013536 | Emg1     | 10 |
| NM_013610 | Ninj1    | 10 |
| NM_013652 | Cc14     | 10 |
| NM_013676 | Supt5h   | 10 |
| NM_013781 | Sh2d3c   | 10 |
| NM_013832 | Rasal1   | 10 |
| NM_013854 | Abcf1    | 10 |
| NM_013921 | Prss30   | 10 |
| NM_016701 | Nes      | 10 |
| NM_016861 | Pdlim1   | 10 |
| NM_016867 | Gipc2    | 10 |
| NM_016958 | Krt14    | 10 |
| NM_016971 | I122     | 10 |
| NM_018734 | Gbp3     | 10 |
| NM_018825 | Sh2b2    | 10 |
| NM_018885 | Irx4     | 10 |
| NM_019776 | Snd1     | 10 |
| NM_019787 | Sec23b   | 10 |
| NM_019911 | Tdo2     | 10 |
| NM_019937 | Ccn11    | 10 |
| NM_020036 | Calm4    | 10 |
| NM_020293 | Cldn9    | 10 |
| NM_020596 | Egr4     | 10 |
| NM_021391 | Ppp1r1a  | 10 |
| NM_021393 | Cobra1   | 10 |
| NM_021394 | Zbp1     | 10 |
| NM_021448 | Elp2     | 10 |
| NM_021481 | Treh     | 10 |

|           |               |    |
|-----------|---------------|----|
| NM_021503 | Myoz2         | 10 |
| NM_021508 | Myoz1         | 10 |
| NM_021547 | Stard3        | 10 |
| NM_021567 | Pcbp4         | 10 |
| NM_021607 | Ncstn         | 10 |
| NM_021713 | Myg1          | 10 |
| NM_021882 | Pmel          | 10 |
| NM_022012 | Map3k11       | 10 |
| NM_023114 | Apoc3         | 10 |
| NM_023119 | Eno1          | 10 |
| NM_023525 | Cad           | 10 |
| NM_023544 | Rsc1a1        | 10 |
| NM_023556 | Mvk           | 10 |
| NM_023729 | Asz1          | 10 |
| NM_023740 | Zdhhc16       | 10 |
| NM_023835 | Trim12a       | 10 |
| NM_024216 | Gpn3          | 10 |
| NM_024221 | Pdhb          | 10 |
| NM_025310 | Ftsj3         | 10 |
| NM_025347 | Ypel3         | 10 |
| NM_025363 | 1110001J03Rik | 10 |
| NM_025364 | Sarnp         | 10 |
| NM_025388 | Ufc1          | 10 |
| NM_025397 | Med11         | 10 |
| NM_025422 | Cd302         | 10 |
| NM_025487 | 1700011A15Rik | 10 |
| NM_025504 | Atp5s1        | 10 |
| NM_025555 | 2410004B18Rik | 10 |
| NM_025559 | 1810046J19Rik | 10 |
| NM_025649 | Mad211bp      | 10 |
| NM_025789 | Rsph3a        | 10 |
| NM_025840 | Bzw2          | 10 |
| NM_025890 | 2410004A20Rik | 10 |
| NM_025966 | 2310039H08Rik | 10 |
| NM_025974 | Rpl14         | 10 |
| NM_025984 | Lcel1a1       | 10 |
| NM_026038 | 2810055F11Rik | 10 |
| NM_026072 | Cwc27         | 10 |
| NM_026142 | 3632451006Rik | 10 |
| NM_026205 | Rnf151        | 10 |
| NM_026206 | Pr17c1        | 10 |
| NM_026212 | Agpat2        | 10 |
| NM_026303 | Alkbh8        | 10 |
| NM_026611 | Rnaset2b      | 10 |
| NM_026634 | A930018P22Rik | 10 |
| NM_026774 | Hbxip         | 10 |
| NM_026787 | 1110012L19Rik | 10 |
| NM_026810 | Mlh1          | 10 |
| NM_026892 | Eif1b         | 10 |
| NM_026942 | Stoml1        | 10 |
| NM_026981 | Dtwd1         | 10 |
| NM_026985 | 1810033B17Rik | 10 |
| NM_027001 | 2610034M16Rik | 10 |
| NM_027011 | Krt5          | 10 |

|           |               |    |
|-----------|---------------|----|
| NM_027094 | Dydc1         | 10 |
| NM_027127 | Gpx8          | 10 |
| NM_027170 | 2310057N15Rik | 10 |
| NM_027196 | Pold4         | 10 |
| NM_027213 | Med6          | 10 |
| NM_027427 | Taf15         | 10 |
| NM_027438 | Pnma1         | 10 |
| NM_027511 | Hrct1         | 10 |
| NM_027532 | 3200002M19Rik | 10 |
| NM_027563 | Krt34         | 10 |
| NM_027614 | Wdr20b        | 10 |
| NM_027810 | Bbs7          | 10 |
| NM_027866 | Colec11       | 10 |
| NM_027889 | Vps11         | 10 |
| NM_027963 | Wdr16         | 10 |
| NM_028002 | Dus41         | 10 |
| NM_028022 | Gats13        | 10 |
| NM_028031 | Zdhhc13       | 10 |
| NM_028036 | Tmco6         | 10 |
| NM_028085 | Anks4b        | 10 |
| NM_028119 | Ddb2          | 10 |
| NM_028228 | Pinx1         | 10 |
| NM_028262 | Setd3         | 10 |
| NM_028303 | Pdzd11        | 10 |
| NM_028412 | Ciz1          | 10 |
| NM_028529 | Nipsnap3a     | 10 |
| NM_028550 | 1700074P13Rik | 10 |
| NM_028634 | Cby1          | 10 |
| NM_028780 | Tm9sf1        | 10 |
| NM_028798 | Crct1         | 10 |
| NM_028841 | Tspan17       | 10 |
| NM_028880 | Lrrtml        | 10 |
| NM_028944 | P4htm         | 10 |
| NM_029112 | Morn3         | 10 |
| NM_029172 | Fam164b       | 10 |
| NM_029195 | Ccdc146       | 10 |
| NM_029410 | Bcl2l12       | 10 |
| NM_029465 | Clec4g        | 10 |
| NM_029741 | Ppfia3        | 10 |
| NM_029888 | Zfp142        | 10 |
| NM_030060 | Batf3         | 10 |
| NM_030187 | Ak7           | 10 |
| NM_030565 | Fam20c        | 10 |
| NM_031180 | K1b           | 10 |
| NM_032544 | Gtpbp3        | 10 |
| NM_033039 | Ocm           | 10 |
| NM_033477 | D17H6S53E     | 10 |
| NM_033601 | Bcl3          | 10 |
| NM_053135 | Pcdhb10       | 10 |
| NM_053266 | Gtf2ird2      | 10 |
| NM_054049 | Osr2          | 10 |
| NM_054079 | Iltifb        | 10 |
| NM_080419 | Igsf8         | 10 |
| NM_080852 | Slc7a12       | 10 |

|           |               |    |
|-----------|---------------|----|
| NM_130881 | Pabpc4        | 10 |
| NM_133210 | Sertad3       | 10 |
| NM_133235 | Khdrbs2       | 10 |
| NM_133353 | Oosp1         | 10 |
| NM_133658 | Ercc3         | 10 |
| NM_133731 | Prss22        | 10 |
| NM_133803 | Dpp3          | 10 |
| NM_133884 | Gpn2          | 10 |
| NM_133894 | Ugt2b38       | 10 |
| NM_133911 | Gpr125        | 10 |
| NM_133926 | Camk1         | 10 |
| NM_133953 | Sf3b3         | 10 |
| NM_133992 | Pan2          | 10 |
| NM_138581 | 1700088E04Rik | 10 |
| NM_138603 | Ccdc22        | 10 |
| NM_139291 | Cdc26         | 10 |
| NM_144526 | Fam64a        | 10 |
| NM_144858 | Dus31         | 10 |
| NM_144875 | Rab711        | 10 |
| NM_144884 | Tor1a         | 10 |
| NM_144929 | Rtbdn         | 10 |
| NM_144939 | Frs3          | 10 |
| NM_144943 | Cd207         | 10 |
| NM_145131 | Pitrm1        | 10 |
| NM_145209 | Oasl1         | 10 |
| NM_145403 | Tmprss4       | 10 |
| NM_145429 | Arrb2         | 10 |
| NM_145519 | Farp2         | 10 |
| NM_145546 | Gtf2b         | 10 |
| NM_145605 | Klhdc4        | 10 |
| NM_145921 | Olah          | 10 |
| NM_145978 | Pdlim2        | 10 |
| NM_146011 | Arhgap9       | 10 |
| NM_146077 | Trim31        | 10 |
| NM_146170 | C87436        | 10 |
| NM_146494 | Olfr722       | 10 |
| NM_146782 | Olfr921       | 10 |
| NM_148939 | Ly6g5b        | 10 |
| NM_152814 | Zfp566        | 10 |
| NM_153160 | Zcchc17       | 10 |
| NM_153179 | Pkhd1         | 10 |
| NM_153540 | C85492        | 10 |
| NM_153596 | Tmem17        | 10 |
| NM_153776 | Tmem121       | 10 |
| NM_153782 | Fam20a        | 10 |
| NM_153791 | Flywch1       | 10 |
| NM_153805 | Pkn3          | 10 |
| NM_172276 | Sfswap        | 10 |
| NM_172487 | Prrt3         | 10 |
| NM_172490 | Sepsecs       | 10 |
| NM_172529 | Gnptg         | 10 |
| NM_172617 | Zfp523        | 10 |
| NM_172648 | Ifi205        | 10 |
| NM_172719 | Gcn111        | 10 |

|           |               |    |
|-----------|---------------|----|
| NM_172730 | C130022K22Rik | 10 |
| NM_172735 | Zc3hc1        | 10 |
| NM_172801 | Otop2         | 10 |
| NM_172852 | Serpinb13     | 10 |
| NM_172898 | Kirrel2       | 10 |
| NM_173387 | Zfp879        | 10 |
| NM_173749 | Pamr1         | 10 |
| NM_175012 | Grp           | 10 |
| NM_175214 | Kif27         | 10 |
| NM_175307 | Fam46b        | 10 |
| NM_175456 | Abra          | 10 |
| NM_175939 | Adam29        | 10 |
| NM_177102 | Tmem91        | 10 |
| NM_177140 | D230037D09Rik | 10 |
| NM_177161 | P4ha3         | 10 |
| NM_177462 | Zmym6         | 10 |
| NM_177593 | Gm4763        | 10 |
| NM_177673 | BC046331      | 10 |
| NM_177723 | Vsig8         | 10 |
| NM_177765 | Tt1113        | 10 |
| NM_177809 | Slc25a48      | 10 |
| NM_177829 | Spink10       | 10 |
| NM_177850 | Bpi           | 10 |
| NM_177864 | Skint9        | 10 |
| NM_177878 | Mblac1        | 10 |
| NM_178089 | Hnrnpull      | 10 |
| NM_178098 | 4930486L24Rik | 10 |
| NM_178375 | Zswim3        | 10 |
| NM_178415 | Bbs9          | 10 |
| NM_178592 | Abhd16a       | 10 |
| NM_178722 | Zfp438        | 10 |
| NM_181584 | Gab3          | 10 |
| NM_183020 | Atxn21        | 10 |
| NM_183025 | A430033K04Rik | 10 |
| NM_183032 | Rnase9        | 10 |
| NM_183250 | Ccdc72        | 10 |
| NM_183283 | 2310010M20Rik | 10 |
| NM_183284 | Spink2        | 10 |
| NM_183294 | Cdk11         | 10 |
| NM_183296 | Krtap16-10    | 10 |
| NM_194063 | Rhox3a        | 10 |
| NM_198011 | E430018J23Rik | 10 |
| NM_198167 | Tmem63b       | 10 |
| NM_198170 | Szt2          | 10 |
| NM_198326 | Nsf11c        | 10 |
| NM_198411 | Inf2          | 10 |
| NM_198618 | Dlgap3        | 10 |
| NM_198960 | Tcfap2e       | 10 |
| NM_199149 | Lrrc68        | 10 |
| NM_201361 | Fam82a1       | 10 |
| NM_203396 | Fam115e       | 10 |
| NM_205820 | Tlr13         | 10 |
| NM_207105 | H2-Ab1        | 10 |
| NM_207213 | Snx25         | 10 |

|              |               |    |
|--------------|---------------|----|
| NM_207231    | Arl5c         | 10 |
| NR_003145    | Snhg10        | 10 |
| NR_003650    | Gm5972        | 10 |
| NR_024513    | Gm5           | 10 |
| NR_027826    | 2610017I09Rik | 10 |
| NR_027915    | 1700120K04Rik | 10 |
| NR_027955    | 4931440P22Rik | 10 |
| NR_028108    | Myeov2        | 10 |
| NR_033616    | Pldi          | 10 |
| NR_033622    | Gm6607        | 10 |
| NR_033639    | Rps19-ps3     | 10 |
| NR_033786    | 1700052I22Rik | 10 |
| NM_001001884 | Nckap5l       | 9  |
| NM_001002004 | 2610507B11Rik | 9  |
| NM_001003911 | Adamts7       | 9  |
| NM_001004141 | Cyp2j11       | 9  |
| NM_001004149 | Zfp366        | 9  |
| NM_001004178 | AA415398      | 9  |
| NM_001005511 | Lmtk3         | 9  |
| NM_001010836 | Ppp1r13l      | 9  |
| NM_001012335 | Mdk           | 9  |
| NM_001013762 | Gm4952        | 9  |
| NM_001013767 | Capn11        | 9  |
| NM_001013785 | Akr1c19       | 9  |
| NM_001013792 | Fam105b       | 9  |
| NM_001013826 | Dupd1         | 9  |
| NM_001014974 | Tt114         | 9  |
| NM_001014996 | Cenpj         | 9  |
| NM_001017362 | Arid3c        | 9  |
| NM_001025586 | Nr2c2ap       | 9  |
| NM_001029867 | Ugt2b36       | 9  |
| NM_001030297 | Tmprss11c     | 9  |
| NM_001033043 | Rnf17         | 9  |
| NM_001033170 | Fam83e        | 9  |
| NM_001033185 | 1700084C01Rik | 9  |
| NM_001033227 | Slc5a10       | 9  |
| NM_001033236 | Mettl21d      | 9  |
| NM_001033308 | BC013712      | 9  |
| NM_001033318 | Cog7          | 9  |
| NM_001033333 | Gm239         | 9  |
| NM_001033449 | Als2cr4       | 9  |
| NM_001033597 | Acs16         | 9  |
| NM_001037168 | Psg27         | 9  |
| NM_001037745 | Zfp791        | 9  |
| NM_001037919 | Gm6460        | 9  |
| NM_001037938 | Dhrs4         | 9  |
| NM_001037997 | Fert2         | 9  |
| NM_001039103 | Rasa4         | 9  |
| NM_001039368 | Polr2k        | 9  |
| NM_001039562 | Ankrd37       | 9  |
| NM_001039655 | Rasgrf1       | 9  |
| NM_001044703 | Zscan21       | 9  |
| NM_001045558 | Pickl         | 9  |
| NM_001077709 | Slc39a7       | 9  |



|              |               |   |
|--------------|---------------|---|
| NM_001079875 | Spam1         | 9 |
| NM_001080811 | Gm5840        | 9 |
| NM_001081041 | 1110014N23Rik | 9 |
| NM_001081067 | Albg          | 9 |
| NM_001081112 | Ankrd26       | 9 |
| NM_001081151 | Gan           | 9 |
| NM_001081238 | Palb2         | 9 |
| NM_001081405 | Vmn2r28       | 9 |
| NM_001081407 | Plb1          | 9 |
| NM_001081429 | Ccdc15        | 9 |
| NM_001081662 | C86695        | 9 |
| NM_001081671 | 1700042B14Rik | 9 |
| NM_001081957 | Gm11428       | 9 |
| NM_001081984 | Popdc2        | 9 |
| NM_001083912 | Plekhg2       | 9 |
| NM_001083916 | 1810019J16Rik | 9 |
| NM_001083945 | Rsph3b        | 9 |
| NM_001083957 | Car1          | 9 |
| NM_001085407 | Sdccag3       | 9 |
| NM_001099309 | Gm12887       | 9 |
| NM_001099688 | Fbxo39        | 9 |
| NM_001102457 | Rhox3c        | 9 |
| NM_001104646 | AW209491      | 9 |
| NM_001109897 | Trpc2         | 9 |
| NM_001111094 | Btnl3         | 9 |
| NM_001112744 | Arhgef16      | 9 |
| NM_001126316 | Gm438         | 9 |
| NM_001126488 | Tex28         | 9 |
| NM_001130476 | Tpst1         | 9 |
| NM_001134385 | Gpr160        | 9 |
| NM_001136069 | Ldha          | 9 |
| NM_001145807 | Fam5c         | 9 |
| NM_001145970 | Mtap7d1       | 9 |
| NM_001150749 | Rdh7          | 9 |
| NM_001159482 | Rab34         | 9 |
| NM_001159672 | Eftud1        | 9 |
| NM_001159907 | Tarbp1        | 9 |
| NM_001159934 | Oaslh         | 9 |
| NM_001162381 | Fam166b       | 9 |
| NM_001162947 | Nek3          | 9 |
| NM_001162979 | Ccdc81        | 9 |
| NM_001163575 | Parp10        | 9 |
| NM_001163615 | Krtap20-2     | 9 |
| NM_001163729 | Klhdc3        | 9 |
| NM_001164327 | Gm4902        | 9 |
| NM_001165935 | Aven          | 9 |
| NM_001166157 | Krt81         | 9 |
| NM_001166172 | Lce6a         | 9 |
| NM_001166381 | Rad52         | 9 |
| NM_001166399 | Rab3a         | 9 |
| NM_001166597 | Dgkz          | 9 |
| NM_001166685 | Ccdc45        | 9 |
| NM_001167757 | Ankrd7        | 9 |
| NM_001170748 | Asb14         | 9 |

|              |              |   |
|--------------|--------------|---|
| NM_001172055 | Bdh2         | 9 |
| NM_001172472 | Sphk1        | 9 |
| NM_001173459 | LOC100038947 | 9 |
| NM_001177730 | Nr1h3        | 9 |
| NM_001177810 | Rapgef3      | 9 |
| NM_001197041 | Ccdc7        | 9 |
| NM_001199015 | Slc7a9       | 9 |
| NM_001199971 | Tac2         | 9 |
| NM_001204252 | Clec10a      | 9 |
| NM_001205081 | Trim47       | 9 |
| NM_001205321 | Scn10a       | 9 |
| NM_007378    | Abca4        | 9 |
| NM_007423    | Afp          | 9 |
| NM_007503    | Fxyd2        | 9 |
| NM_007505    | Atp5a1       | 9 |
| NM_007533    | Bckdha       | 9 |
| NM_007617    | Cav3         | 9 |
| NM_007636    | Cct2         | 9 |
| NM_007687    | Cf11         | 9 |
| NM_007696    | Ovgpl        | 9 |
| NM_007721    | Ccr10        | 9 |
| NM_007724    | Cnga2        | 9 |
| NM_007759    | Crabp2       | 9 |
| NM_007866    | D113         | 9 |
| NM_008009    | Fgfbp1       | 9 |
| NM_008027    | Flot1        | 9 |
| NM_008110    | Gdf9         | 9 |
| NM_008159    | Gpr33        | 9 |
| NM_008172    | Grin2d       | 9 |
| NM_008180    | Gss          | 9 |
| NM_008243    | Mst1         | 9 |
| NM_008267    | Hoxb13       | 9 |
| NM_008287    | Hrsp12       | 9 |
| NM_008330    | Ifi47        | 9 |
| NM_008511    | Lrmp         | 9 |
| NM_008627    | Meis3        | 9 |
| NM_008629    | Msi1         | 9 |
| NM_008669    | Naga         | 9 |
| NM_008753    | Oaz1         | 9 |
| NM_008754    | Obpla        | 9 |
| NM_008793    | Pcsk4        | 9 |
| NM_008820    | Pepd         | 9 |
| NM_008898    | Por          | 9 |
| NM_008921    | Prim1        | 9 |
| NM_008943    | Psen1        | 9 |
| NM_008985    | Ptpn         | 9 |
| NM_009057    | Slc50a1      | 9 |
| NM_009410    | Top3a        | 9 |
| NM_009438    | Rpl13a       | 9 |
| NM_009543    | Rnf103       | 9 |
| NM_009685    | Apbb1        | 9 |
| NM_009725    | Atp5f1       | 9 |
| NM_009983    | Ctsd         | 9 |
| NM_010010    | Cyp46a1      | 9 |

|           |               |   |
|-----------|---------------|---|
| NM_010062 | Dnase2a       | 9 |
| NM_010070 | Dok1          | 9 |
| NM_010086 | Adam24        | 9 |
| NM_010090 | Dusp2         | 9 |
| NM_010149 | Epor          | 9 |
| NM_010246 | Fzd9          | 9 |
| NM_010348 | Grik1         | 9 |
| NM_010350 | Grin2c        | 9 |
| NM_010648 | Klra3         | 9 |
| NM_010662 | Krt13         | 9 |
| NM_010859 | Myl3          | 9 |
| NM_010953 | Oc90          | 9 |
| NM_011051 | Pdcd6         | 9 |
| NM_011053 | Pdcd11        | 9 |
| NM_011121 | Plk1          | 9 |
| NM_011156 | Prep          | 9 |
| NM_011224 | Pygm          | 9 |
| NM_011297 | Rps24         | 9 |
| NM_011430 | Sncg          | 9 |
| NM_011538 | Tbx6          | 9 |
| NM_011609 | Tnfrsf1a      | 9 |
| NM_011725 | Xlr           | 9 |
| NM_011875 | Psmd13        | 9 |
| NM_011913 | Best1         | 9 |
| NM_011921 | Aldh1a7       | 9 |
| NM_011965 | Psmal         | 9 |
| NM_012060 | Bcap31        | 9 |
| NM_013494 | Cpe           | 9 |
| NM_013519 | Foxc2         | 9 |
| NM_013569 | Kcnh2         | 9 |
| NM_013748 | Clnk          | 9 |
| NM_015816 | Lsm4          | 9 |
| NM_016778 | Bok           | 9 |
| NM_016781 | Prkag1        | 9 |
| NM_016804 | Mtx2          | 9 |
| NM_016813 | Nxf1          | 9 |
| NM_017406 | Atf6b         | 9 |
| NM_018779 | Pde3a         | 9 |
| NM_018795 | Abcc6         | 9 |
| NM_018858 | Pebp1         | 9 |
| NM_019493 | Btg4          | 9 |
| NM_019566 | Rhog          | 9 |
| NM_019662 | Rrad          | 9 |
| NM_019679 | Fmn11         | 9 |
| NM_019718 | Arl3          | 9 |
| NM_019749 | Gabarap       | 9 |
| NM_019795 | Dnajc7        | 9 |
| NM_019836 | 2610024G14Rik | 9 |
| NM_019861 | Ctsf          | 9 |
| NM_019995 | Fam48a        | 9 |
| NM_020022 | Rfc2          | 9 |
| NM_020486 | Bcam          | 9 |
| NM_020561 | Smpd13a       | 9 |
| NM_020567 | Gmn           | 9 |

|           |               |   |
|-----------|---------------|---|
| NM_020587 | Srsf4         | 9 |
| NM_020619 | Mogs          | 9 |
| NM_021280 | Plcg1         | 9 |
| NM_021306 | Ecell         | 9 |
| NM_021334 | Itgax         | 9 |
| NM_021430 | Rilpl1        | 9 |
| NM_021492 | Ap3b2         | 9 |
| NM_021516 | Mark3         | 9 |
| NM_021534 | Pxmp4         | 9 |
| NM_022009 | Flii          | 9 |
| NM_022324 | Sdf2l1        | 9 |
| NM_022419 | Abhd8         | 9 |
| NM_022993 | Lrp10         | 9 |
| NM_023326 | Bmyc          | 9 |
| NM_023343 | Ilkap         | 9 |
| NM_023478 | Upk3a         | 9 |
| NM_023485 | Sync          | 9 |
| NM_023511 | Krtap3-1      | 9 |
| NM_023910 | Tsc22d4       | 9 |
| NM_024256 | B3gat3        | 9 |
| NM_024262 | 1200011M11Rik | 9 |
| NM_024281 | Rrbp1         | 9 |
| NM_025412 | Pycr1         | 9 |
| NM_025441 | Nemf          | 9 |
| NM_025467 | Gkn2          | 9 |
| NM_025500 | Mrpl37        | 9 |
| NM_025517 | Rtcd1         | 9 |
| NM_025518 | Dus2l         | 9 |
| NM_025526 | Iscu          | 9 |
| NM_025564 | Magohb        | 9 |
| NM_025700 | Pgm1          | 9 |
| NM_025869 | Dusp26        | 9 |
| NM_026053 | Gemin6        | 9 |
| NM_026066 | Cmtm5         | 9 |
| NM_026113 | Gtf3c6        | 9 |
| NM_026123 | Unc50         | 9 |
| NM_026129 | Erp29         | 9 |
| NM_026233 | 4933434I20Rik | 9 |
| NM_026322 | Msra          | 9 |
| NM_026323 | Wfdc2         | 9 |
| NM_026328 | Reg4          | 9 |
| NM_026360 | Ddx47         | 9 |
| NM_026394 | Lce1f         | 9 |
| NM_026438 | Ppa1          | 9 |
| NM_026473 | Tubb6         | 9 |
| NM_026512 | Bph1          | 9 |
| NM_026523 | Nmb           | 9 |
| NM_026555 | Rcn3          | 9 |
| NM_026585 | D6Wsu116e     | 9 |
| NM_026618 | Ccdc56        | 9 |
| NM_026625 | 1700067P10Rik | 9 |
| NM_026728 | Echdc2        | 9 |
| NM_026740 | Slc46a1       | 9 |
| NM_026752 | Zfyve21       | 9 |

|           |               |   |
|-----------|---------------|---|
| NM_026832 | Cgrrf1        | 9 |
| NM_026845 | Ppil1         | 9 |
| NM_026896 | Med27         | 9 |
| NM_026900 | Zfp580        | 9 |
| NM_026902 | Mctsl         | 9 |
| NM_026935 | Sult1c2       | 9 |
| NM_027089 | 4930579C15Rik | 9 |
| NM_027106 | Avpil         | 9 |
| NM_027158 | 2310043J07Rik | 9 |
| NM_027173 | 2310079G19Rik | 9 |
| NM_027293 | Dopey2        | 9 |
| NM_027294 | Cmtm8         | 9 |
| NM_027309 | Lysmd2        | 9 |
| NM_027457 | 5730437N04Rik | 9 |
| NM_027470 | Pak4          | 9 |
| NM_027512 | 3830417A13Rik | 9 |
| NM_027744 | 4933437F05Rik | 9 |
| NM_027772 | Pdss2         | 9 |
| NM_027898 | Gramd1a       | 9 |
| NM_027902 | Tmprss6       | 9 |
| NM_027917 | Shroom1       | 9 |
| NM_027935 | Tmem50a       | 9 |
| NM_027976 | Acs15         | 9 |
| NM_028095 | Mettl10       | 9 |
| NM_028116 | Pygol         | 9 |
| NM_028284 | Bbs5          | 9 |
| NM_028384 | Ccdc13        | 9 |
| NM_028481 | Ccdc18        | 9 |
| NM_028625 | Lce1a2        | 9 |
| NM_028749 | Npl           | 9 |
| NM_028759 | Dcaf6         | 9 |
| NM_028783 | Robo4         | 9 |
| NM_028797 | Gtsf1         | 9 |
| NM_028851 | 1700080016Rik | 9 |
| NM_028947 | Arl13a        | 9 |
| NM_028948 | Ccdc11        | 9 |
| NM_029092 | Rg9mtd1       | 9 |
| NM_029158 | Zcchc13       | 9 |
| NM_029203 | Rhox2a        | 9 |
| NM_029211 | Rnf121        | 9 |
| NM_029274 | Wbp7          | 9 |
| NM_029291 | Ascc2         | 9 |
| NM_029321 | Ttc32         | 9 |
| NM_029600 | Abcc3         | 9 |
| NM_029667 | Lce1i         | 9 |
| NM_029681 | Wbscr28       | 9 |
| NM_029848 | Hyal4         | 9 |
| NM_030703 | Cpn1          | 9 |
| NM_031261 | Fthl17        | 9 |
| NM_031871 | Ghdc          | 9 |
| NM_032006 | Mmp1a         | 9 |
| NM_033079 | D6Mm5e        | 9 |
| NM_033371 | Ppp1r16a      | 9 |
| NM_053095 | I124          | 9 |

|           |               |   |
|-----------|---------------|---|
| NM_053111 | Ear6          | 9 |
| NM_053215 | Ugt2b37       | 9 |
| NM_053216 | 1700102P08Rik | 9 |
| NM_054100 | 2310034C09Rik | 9 |
| NM_080459 | Strc          | 9 |
| NM_080595 | Emid1         | 9 |
| NM_080643 | Caskin2       | 9 |
| NM_080837 | D17Wsu104e    | 9 |
| NM_130454 | Recql5        | 9 |
| NM_130880 | Otud7a        | 9 |
| NM_130904 | Cd209d        | 9 |
| NM_133185 | Rogdi         | 9 |
| NM_133364 | Primal        | 9 |
| NM_133662 | Ier3          | 9 |
| NM_133678 | Sac3d1        | 9 |
| NM_133893 | Oas1d         | 9 |
| NM_133905 | Papd4         | 9 |
| NM_133916 | Eif3b         | 9 |
| NM_133976 | Imp3          | 9 |
| NM_134003 | Zc3h10        | 9 |
| NM_134058 | Pelo          | 9 |
| NM_134091 | Sgsm3         | 9 |
| NM_134102 | Pla1a         | 9 |
| NM_134230 | Vmn1r66       | 9 |
| NM_138302 | Tymp          | 9 |
| NM_138673 | Stab2         | 9 |
| NM_138942 | Dbh           | 9 |
| NM_139218 | Dppa3         | 9 |
| NM_139302 | Sh3glb2       | 9 |
| NM_144790 | Ankrd33       | 9 |
| NM_144835 | Heatr1        | 9 |
| NM_145365 | Creb3l3       | 9 |
| NM_145382 | Fam193b       | 9 |
| NM_145440 | Uts2r         | 9 |
| NM_145603 | Ces2c         | 9 |
| NM_145684 | Alox12e       | 9 |
| NM_145822 | Cd3eap        | 9 |
| NM_145828 | Xylt2         | 9 |
| NM_145831 | Dmrt2         | 9 |
| NM_145970 | Cc2d1a        | 9 |
| NM_146084 | Fam13b        | 9 |
| NM_146201 | Zfp553        | 9 |
| NM_153405 | Rbm45         | 9 |
| NM_153585 | Cnot10        | 9 |
| NM_153590 | Klrel         | 9 |
| NM_172267 | Phyhd1        | 9 |
| NM_172447 | A330021E22Rik | 9 |
| NM_172565 | Klh11         | 9 |
| NM_172583 | Tmem63c       | 9 |
| NM_172619 | Adamts10      | 9 |
| NM_172826 | Dact2         | 9 |
| NM_172916 | Hydin         | 9 |
| NM_173751 | Ilvl1         | 9 |
| NM_174987 | 1810063B05Rik | 9 |

|              |               |   |
|--------------|---------------|---|
| NM_175022    | Prr12         | 9 |
| NM_175109    | Rps19bp1      | 9 |
| NM_175173    | Wdr27         | 9 |
| NM_175200    | Als2cr11      | 9 |
| NM_175362    | Card11        | 9 |
| NM_175397    | Sp110         | 9 |
| NM_175481    | Grik4         | 9 |
| NM_175687    | A230050P20Rik | 9 |
| NM_176950    | Defb20        | 9 |
| NM_177002    | C730048C13Rik | 9 |
| NM_177101    | 4833442J19Rik | 9 |
| NM_177213    | Abca15        | 9 |
| NM_177473    | Tmem191c      | 9 |
| NM_177651    | 4933409G03Rik | 9 |
| NM_177882    | Zfp786        | 9 |
| NM_178374    | Snupn         | 9 |
| NM_178643    | C230052I12Rik | 9 |
| NM_178856    | Gins2         | 9 |
| NM_178888    | Garnl3        | 9 |
| NM_178914    | Spata7        | 9 |
| NM_179203    | Atad3a        | 9 |
| NM_181490    | Cldn17        | 9 |
| NM_181543    | Gpr151        | 9 |
| NM_181748    | O3far1        | 9 |
| NM_182928    | Adm2          | 9 |
| NM_183111    | Rfpl3s        | 9 |
| NM_183152    | Plk5          | 9 |
| NM_183183    | Gprin3        | 9 |
| NM_198193    | Raet1e        | 9 |
| NM_198608    | Aars2         | 9 |
| NM_198623    | Ubqln3        | 9 |
| NM_198642    | 5031414D18Rik | 9 |
| NM_198858    | Ctf2          | 9 |
| NM_199447    | Rrp12         | 9 |
| NM_201615    | Prlhr         | 9 |
| NM_207208    | Clca6         | 9 |
| NR_015373    | Gm5485        | 9 |
| NR_026944    | Gm10941       | 9 |
| NR_027507    | Tspy-ps       | 9 |
| NR_027901    | 2900060B14Rik | 9 |
| NR_027986    | 4930474M22Rik | 9 |
| NR_033727    | Rps27         | 9 |
| NR_034038    | 5430416N02Rik | 9 |
| NR_037976    | LOC100503248  | 9 |
| NR_038009    | 2810408I11Rik | 9 |
| NM_001002896 | Bfsp2         | 8 |
| NM_001004193 | Rhox8         | 8 |
| NM_001008502 | Bbs12         | 8 |
| NM_001009573 | Unc13d        | 8 |
| NM_001009947 | Dock11        | 8 |
| NM_001009952 | Abpd          | 8 |
| NM_001010930 | Mrps33        | 8 |
| NM_001011876 | Ang6          | 8 |
| NM_001012305 | Slc39a12      | 8 |

|              |               |   |
|--------------|---------------|---|
| NM_001013393 | Gm11487       | 8 |
| NM_001013773 | BC055004      | 8 |
| NM_001013797 | Spink6        | 8 |
| NM_001013817 | Sp140         | 8 |
| NM_001014390 | Dyrk2         | 8 |
| NM_001018079 | Lce3f         | 8 |
| NM_001025605 | Gm527         | 8 |
| NM_001029933 | Zfp114        | 8 |
| NM_001029978 | Tceal3        | 8 |
| NM_001031622 | Gm16367       | 8 |
| NM_001033316 | Ffar3         | 8 |
| NM_001033343 | Sec31b        | 8 |
| NM_001033425 | Zscan10       | 8 |
| NM_001033782 | Gm5592        | 8 |
| NM_001033929 | Thns12        | 8 |
| NM_001038697 | Gm5635        | 8 |
| NM_001038998 | Ccdc23        | 8 |
| NM_001040089 | Rhox3f        | 8 |
| NM_001040654 | Cdkn2a        | 8 |
| NM_001042491 | Anapc5        | 8 |
| NM_001045535 | Serpinb6e     | 8 |
| NM_001048217 | Spink11       | 8 |
| NM_001077264 | Ap2a1         | 8 |
| NM_001077348 | Plin5         | 8 |
| NM_001081007 | Zfp382        | 8 |
| NM_001081017 | Unc79         | 8 |
| NM_001081029 | 4930420K17Rik | 8 |
| NM_001081075 | 5730455013Rik | 8 |
| NM_001081145 | Tigd2         | 8 |
| NM_001081171 | Lama5         | 8 |
| NM_001081219 | Myo1a         | 8 |
| NM_001081247 | Polr3a        | 8 |
| NM_001081254 | Fam186b       | 8 |
| NM_001081369 | Ccdc153       | 8 |
| NM_001081386 | Cdh19         | 8 |
| NM_001081408 | Agmat         | 8 |
| NM_001081431 | Zfp498        | 8 |
| NM_001081644 | Gm428         | 8 |
| NM_001081669 | Rhox2d        | 8 |
| NM_001083331 | Nup88         | 8 |
| NM_001085370 | Speg          | 8 |
| NM_001085524 | Gm5634        | 8 |
| NM_001085534 | Gm5938        | 8 |
| NM_001099312 | Gm11569       | 8 |
| NM_001099632 | Rnf39         | 8 |
| NM_001101546 | Tmem233       | 8 |
| NM_001101620 | Klra8         | 8 |
| NM_001109971 | Sec61g        | 8 |
| NM_001110252 | Hpn           | 8 |
| NM_001110809 | Gpatch4       | 8 |
| NM_001112702 | Tnni1         | 8 |
| NM_001113471 | Plin1         | 8 |
| NM_001114153 | Rhox2g        | 8 |
| NM_001114637 | Jmjd7         | 8 |



|              |               |   |
|--------------|---------------|---|
| NM_001115075 | H2-M5         | 8 |
| NM_001122639 | Galnt9        | 8 |
| NM_001122818 | Pnpla6        | 8 |
| NM_001126487 | Heatr8        | 8 |
| NM_001130150 | Arhgef1       | 8 |
| NM_001130416 | Hdac6         | 8 |
| NM_001130458 | Tcn2          | 8 |
| NM_001135688 | Ly6h          | 8 |
| NM_001141933 | Nkain4        | 8 |
| NM_001142441 | Gm10094       | 8 |
| NM_001142734 | Gm8994        | 8 |
| NM_001143765 | Syce1         | 8 |
| NM_001144953 | Vwa5b2        | 8 |
| NM_001145958 | Crocc         | 8 |
| NM_001145968 | Rwdd2a        | 8 |
| NM_001146022 | Wdfy4         | 8 |
| NM_001160319 | Ubr4          | 8 |
| NM_001160386 | Dnahc7b       | 8 |
| NM_001160420 | Optc          | 8 |
| NM_001161667 | Acox2         | 8 |
| NM_001161724 | Ilk           | 8 |
| NM_001161731 | Ang           | 8 |
| NM_001161741 | Reg3d         | 8 |
| NM_001161818 | Zfp639        | 8 |
| NM_001163276 | Med16         | 8 |
| NM_001163487 | Pfkm          | 8 |
| NM_001163748 | Pde9a         | 8 |
| NM_001163749 | 2310057J16Rik | 8 |
| NM_001163763 | Tcf19         | 8 |
| NM_001164057 | Pola2         | 8 |
| NM_001164058 | Pr17a1        | 8 |
| NM_001164166 | Pom121112     | 8 |
| NM_001164374 | LOC100302688  | 8 |
| NM_001164557 | Pdzklip1      | 8 |
| NM_001164574 | Kbtbd3        | 8 |
| NM_001164612 | Atp13a4       | 8 |
| NM_001164767 | Robo3         | 8 |
| NM_001166370 | Trmt112       | 8 |
| NM_001166371 | Zfml          | 8 |
| NM_001167775 | Rbm10         | 8 |
| NM_001167936 | Zyg11a        | 8 |
| NM_001168660 | Apo19b        | 8 |
| NM_001173372 | Fxyd4         | 8 |
| NM_001177380 | Cypt15        | 8 |
| NM_001177525 | EU599041      | 8 |
| NM_001190445 | 2610002J02Rik | 8 |
| NM_001190453 | Dctn2         | 8 |
| NM_001191018 | Krtap22-2     | 8 |
| NM_001191032 | Cypt14        | 8 |
| NM_001195253 | Gm3336        | 8 |
| NM_001199023 | Pla2g6        | 8 |
| NM_001199187 | Ascc1         | 8 |
| NM_001199733 | Daxx          | 8 |
| NM_001204241 | Clec4a3       | 8 |

|           |         |   |
|-----------|---------|---|
| NM_007381 | Acad1   | 8 |
| NM_007412 | Gpr182  | 8 |
| NM_007475 | Rplp0   | 8 |
| NM_007630 | Ccnb2   | 8 |
| NM_007633 | Ccne1   | 8 |
| NM_007689 | Chad    | 8 |
| NM_007748 | Cox6a1  | 8 |
| NM_007817 | Cyp2f2  | 8 |
| NM_007823 | Cyp4b1  | 8 |
| NM_007895 | Ear2    | 8 |
| NM_007907 | Eef2    | 8 |
| NM_007980 | Fabp2   | 8 |
| NM_008072 | Gabrd   | 8 |
| NM_008096 | Gc      | 8 |
| NM_008147 | Gp49a   | 8 |
| NM_008184 | Gstm6   | 8 |
| NM_008215 | Has1    | 8 |
| NM_008254 | Hmgcl   | 8 |
| NM_008257 | Hmx3    | 8 |
| NM_008296 | Hsf1    | 8 |
| NM_008321 | Id3     | 8 |
| NM_008324 | Ido1    | 8 |
| NM_008327 | Ifi202b | 8 |
| NM_008405 | Itgb2l  | 8 |
| NM_008464 | Klra6   | 8 |
| NM_008579 | Meig1   | 8 |
| NM_008649 | Mup5    | 8 |
| NM_008657 | Myf6    | 8 |
| NM_008673 | Nat1    | 8 |
| NM_008683 | Nedd8   | 8 |
| NM_008691 | Nefm    | 8 |
| NM_008707 | Nmt1    | 8 |
| NM_008723 | Npm3    | 8 |
| NM_008726 | Nppb    | 8 |
| NM_008727 | Npr1    | 8 |
| NM_008823 | Cfp     | 8 |
| NM_008920 | Prg2    | 8 |
| NM_008949 | Psmc3ip | 8 |
| NM_009023 | Rapsn   | 8 |
| NM_009156 | Sepw1   | 8 |
| NM_009161 | Sgca    | 8 |
| NM_009300 | Svs4    | 8 |
| NM_009315 | Taf6    | 8 |
| NM_009445 | Ttk     | 8 |
| NM_009478 | Urod    | 8 |
| NM_009604 | Chrng   | 8 |
| NM_009714 | Asgr1   | 8 |
| NM_009894 | Cideb   | 8 |
| NM_009920 | Cnih2   | 8 |
| NM_009945 | Cox7a2  | 8 |
| NM_009949 | Cpt2    | 8 |
| NM_009971 | Csf3    | 8 |
| NM_009989 | Cyct    | 8 |
| NM_010143 | Ephb3   | 8 |

|           |           |   |
|-----------|-----------|---|
| NM_010163 | Ext2      | 8 |
| NM_010174 | Fabp3     | 8 |
| NM_010219 | Fkbp4     | 8 |
| NM_010222 | Fkbp7     | 8 |
| NM_010304 | Gna15     | 8 |
| NM_010311 | Gnaz      | 8 |
| NM_010425 | Foxd3     | 8 |
| NM_010495 | Id1       | 8 |
| NM_010588 | Jag2      | 8 |
| NM_010589 | Jak3      | 8 |
| NM_010651 | Klra9     | 8 |
| NM_010659 | Krt31     | 8 |
| NM_010670 | Krtap12-1 | 8 |
| NM_010726 | Phyh      | 8 |
| NM_010910 | Nefl      | 8 |
| NM_010922 | Mrpl40    | 8 |
| NM_011118 | Pr12c3    | 8 |
| NM_011167 | Pr18a6    | 8 |
| NM_011185 | Psmbl     | 8 |
| NM_011226 | Rab19     | 8 |
| NM_011366 | Sorbs3    | 8 |
| NM_011420 | Smn1      | 8 |
| NM_011424 | Ncor2     | 8 |
| NM_011516 | Sycp1     | 8 |
| NM_011606 | Clec3b    | 8 |
| NM_011616 | Cd401g    | 8 |
| NM_011631 | Hsp90b1   | 8 |
| NM_011708 | Vwf       | 8 |
| NM_011722 | Dctn6     | 8 |
| NM_011814 | Fxr2      | 8 |
| NM_011954 | Pr12c4    | 8 |
| NM_011980 | Zfp146    | 8 |
| NM_012001 | Cops4     | 8 |
| NM_012011 | Eif2s3y   | 8 |
| NM_012057 | Irf5      | 8 |
| NM_013532 | Lilrb4    | 8 |
| NM_013570 | Krt33b    | 8 |
| NM_013733 | Chaf1a    | 8 |
| NM_013880 | Plc12     | 8 |
| NM_016659 | Klra1     | 8 |
| NM_016718 | Ninj2     | 8 |
| NM_016774 | Atp5b     | 8 |
| NM_016811 | Dgka      | 8 |
| NM_016904 | Cks1b     | 8 |
| NM_016928 | Tlr5      | 8 |
| NM_016933 | Ptprcap   | 8 |
| NM_017393 | Clpp      | 8 |
| NM_018738 | Igtp      | 8 |
| NM_018791 | Zfp108    | 8 |
| NM_018880 | Trim3     | 8 |
| NM_019428 | Rpp30     | 8 |
| NM_019436 | Sit1      | 8 |
| NM_019471 | Mmp10     | 8 |
| NM_019580 | Gde1      | 8 |

|           |               |       |   |
|-----------|---------------|-------|---|
| NM_019587 | Plxnb3        |       | 8 |
| NM_019639 | Ubc           |       | 8 |
| NM_019723 | Slc22a21      |       | 8 |
| NM_019731 | Nme4          |       | 8 |
| NM_019924 | Rps6ka4       |       | 8 |
| NM_020016 | Magea2        |       | 8 |
| NM_020564 | Sult5a1       |       | 8 |
| NM_020575 |               | 7-Mar | 8 |
| NM_020603 | Wdr46         |       | 8 |
| NM_020623 | Pth           |       | 8 |
| NM_021282 | Cyp2e1        |       | 8 |
| NM_021307 | Zfp112        |       | 8 |
| NM_021344 | Tesc          |       | 8 |
| NM_021437 | 1700123020Rik |       | 8 |
| NM_021470 | Rnf32         |       | 8 |
| NM_021710 | Ap4s1         |       | 8 |
| NM_021712 | Slc18a3       |       | 8 |
| NM_021718 | Ms4a4b        |       | 8 |
| NM_022007 | Fxyd7         |       | 8 |
| NM_022814 | Svepl         |       | 8 |
| NM_022982 | Rtn4r         |       | 8 |
| NM_022999 | Prrg2         |       | 8 |
| NM_023135 | Sult1e1       |       | 8 |
| NM_023168 | Grina         |       | 8 |
| NM_023173 | Dusp12        |       | 8 |
| NM_023332 | Pr18a9        |       | 8 |
| NM_023395 | Wfdc1         |       | 8 |
| NM_023523 | Pecr          |       | 8 |
| NM_023530 | Pla2g12b      |       | 8 |
| NM_023742 | Dtx2          |       | 8 |
| NM_024210 | 2310033P09Rik |       | 8 |
| NM_024245 | Kif23         |       | 8 |
| NM_024258 | Usp16         |       | 8 |
| NM_025304 | Lcmt1         |       | 8 |
| NM_025314 | Dtd1          |       | 8 |
| NM_025360 | Tmed3         |       | 8 |
| NM_025381 | Atp6v1f       |       | 8 |
| NM_025390 | Pop4          |       | 8 |
| NM_025392 | Bccip         |       | 8 |
| NM_025495 | Cenpp         |       | 8 |
| NM_025525 | Rnf113a2      |       | 8 |
| NM_025527 | Srp19         |       | 8 |
| NM_025540 | Sln           |       | 8 |
| NM_025567 | Cycl          |       | 8 |
| NM_025576 | Ptpmt1        |       | 8 |
| NM_025599 | 2610528E23Rik |       | 8 |
| NM_025614 | Rwdd1         |       | 8 |
| NM_025634 | 2310042E22Rik |       | 8 |
| NM_025641 | Uqcrh         |       | 8 |
| NM_025665 | Snrnp27       |       | 8 |
| NM_025769 | Efcab1        |       | 8 |
| NM_025797 | Cyb5          |       | 8 |
| NM_025867 | Serpinb11     |       | 8 |
| NM_025878 | Mrps18b       |       | 8 |

|           |               |   |
|-----------|---------------|---|
| NM_025886 | Rassf7        | 8 |
| NM_026001 | Rnaseh2b      | 8 |
| NM_026031 | Utp11l        | 8 |
| NM_026035 | Mrpl55        | 8 |
| NM_026251 | Pat12         | 8 |
| NM_026279 | Bend5         | 8 |
| NM_026316 | Aldh3b1       | 8 |
| NM_026329 | Polr2g        | 8 |
| NM_026338 | 4921517D21Rik | 8 |
| NM_026441 | Pef1          | 8 |
| NM_026461 | 1700129C05Rik | 8 |
| NM_026481 | Tppp3         | 8 |
| NM_026529 | 2700062C07Rik | 8 |
| NM_026633 | Fam195a       | 8 |
| NM_026645 | Iqcf3         | 8 |
| NM_026741 | Zfp579        | 8 |
| NM_026772 | Cdc42ep2      | 8 |
| NM_026784 | Pmvk          | 8 |
| NM_026812 | Hddc3         | 8 |
| NM_026835 | Ms4a6d        | 8 |
| NM_026862 | Cd177         | 8 |
| NM_026883 | 1500011H22Rik | 8 |
| NM_026899 | Ssu72         | 8 |
| NM_026916 | 4930579G22Rik | 8 |
| NM_026987 | Dhx16         | 8 |
| NM_027048 | 1700008P02Rik | 8 |
| NM_027087 | Krtap4-13     | 8 |
| NM_027161 | Tmem52        | 8 |
| NM_027186 | Rpain         | 8 |
| NM_027189 | Gemin7        | 8 |
| NM_027191 | Nup37         | 8 |
| NM_027263 | Apitd1        | 8 |
| NM_027366 | Ly6g6e        | 8 |
| NM_027556 | Cep192        | 8 |
| NM_027634 | 4931431F19Rik | 8 |
| NM_027728 | Enkur         | 8 |
| NM_027777 | Pex1          | 8 |
| NM_027800 | Krtap2-4      | 8 |
| NM_027815 | 9030624J02Rik | 8 |
| NM_027844 | Krtap5-2      | 8 |
| NM_027864 | Galnt14       | 8 |
| NM_027924 | Pdgfd         | 8 |
| NM_027939 | 1700006A11Rik | 8 |
| NM_027983 | Krt33a        | 8 |
| NM_028037 | Acad10        | 8 |
| NM_028048 | Slc25a35      | 8 |
| NM_028170 | 1700030K09Rik | 8 |
| NM_028191 | Cyp2c65       | 8 |
| NM_028270 | Aldh1b1       | 8 |
| NM_028355 | Tmem48        | 8 |
| NM_028375 | Cxx1c         | 8 |
| NM_028386 | Asphd2        | 8 |
| NM_028392 | Ppp2r2b       | 8 |
| NM_028491 | 1700040L02Rik | 8 |

|           |               |   |
|-----------|---------------|---|
| NM_028602 | Tex19.1       | 8 |
| NM_028621 | Krtap16-7     | 8 |
| NM_028753 | Pop7          | 8 |
| NM_028832 | Mterfd3       | 8 |
| NM_028868 | Cxxc1         | 8 |
| NM_028881 | Crtc2         | 8 |
| NM_028913 | Zfp819        | 8 |
| NM_028977 | Lrrc17        | 8 |
| NM_029066 | Wbp2nl        | 8 |
| NM_029096 | 1110008J03Rik | 8 |
| NM_029170 | 4930519F16Rik | 8 |
| NM_029269 | Spp2          | 8 |
| NM_029325 | Spinlwl       | 8 |
| NM_029368 | 1700029F09Rik | 8 |
| NM_029391 | Rab4b         | 8 |
| NM_029594 | I131          | 8 |
| NM_029613 | Krtap4-7      | 8 |
| NM_029760 | Nubpl         | 8 |
| NM_029762 | Hyls1         | 8 |
| NM_029775 | Dcun1d5       | 8 |
| NM_029821 | 1190003J15Rik | 8 |
| NM_029985 | Lrrc42        | 8 |
| NM_029987 | Rpe65         | 8 |
| NM_030024 | Prr15         | 8 |
| NM_030061 | Spink12       | 8 |
| NM_030093 | Snrnp25       | 8 |
| NM_030205 | Coro7         | 8 |
| NM_030559 | Vps16         | 8 |
| NM_030560 | Cwc22         | 8 |
| NM_030677 | Gpx2          | 8 |
| NM_030697 | Kank3         | 8 |
| NM_031191 | Pr12c2        | 8 |
| NM_031260 | Mov1011       | 8 |
| NM_053068 | Chrac1        | 8 |
| NM_053070 | Car7          | 8 |
| NM_053093 | Tac4          | 8 |
| NM_053116 | Wnt16         | 8 |
| NM_053122 | Immp21        | 8 |
| NM_053151 | Klra21        | 8 |
| NM_053153 | Klra18        | 8 |
| NM_053154 | Klra19        | 8 |
| NM_054099 | 1110038F14Rik | 8 |
| NM_080456 | Mrps6         | 8 |
| NM_133192 | Npffr2        | 8 |
| NM_133209 | Pilrb1        | 8 |
| NM_133239 | Crb1          | 8 |
| NM_133355 | Grid2ip       | 8 |
| NM_133728 | Asnsd1        | 8 |
| NM_133767 | Mtif2         | 8 |
| NM_133783 | Ptges2        | 8 |
| NM_133839 | Mmadhc        | 8 |
| NM_133867 | Eps813        | 8 |
| NM_133872 | Kdmla         | 8 |
| NM_133978 | Cmtm7         | 8 |

|           |               |        |   |
|-----------|---------------|--------|---|
| NM_133999 | Fig4          |        | 8 |
| NM_134028 | Tubg2         |        | 8 |
| NM_134125 | Trip10        |        | 8 |
| NM_134252 | Trpm8         |        | 8 |
| NM_138592 | Usp39         |        | 8 |
| NM_138593 | Larp7         |        | 8 |
| NM_139149 | Fus           |        | 8 |
| NM_144820 | Ccdc28a       |        | 8 |
| NM_145145 | Pomt1         |        | 8 |
| NM_145406 | Slc10a3       |        | 8 |
| NM_145434 | Nr1d1         |        | 8 |
| NM_145442 | Mbip          |        | 8 |
| NM_145572 | Gys2          |        | 8 |
| NM_145700 | Ccr11         |        | 8 |
| NM_145830 | Ehmt2         |        | 8 |
| NM_145835 | Lct1          |        | 8 |
| NM_145973 | Ell3          |        | 8 |
| NM_146050 | Oit1          |        | 8 |
| NM_146167 | Gimap7        |        | 8 |
| NM_146216 | Vac14         |        | 8 |
| NM_146249 | Zfp119b       |        | 8 |
| NM_146809 | Olfrl426      |        | 8 |
| NM_153570 | Noc4l         |        | 8 |
| NM_153571 | Hscb          |        | 8 |
| NM_172293 | Fam113b       |        | 8 |
| NM_172439 | Inpp5j        |        | 8 |
| NM_172502 | Dcaf15        |        | 8 |
| NM_172568 |               | 10-Mar | 8 |
| NM_172620 | Vps52         |        | 8 |
| NM_172896 | Nlrp4a        |        | 8 |
| NM_173047 | Cbr3          |        | 8 |
| NM_173383 | Dnd1          |        | 8 |
| NM_173762 | Cenpe         |        | 8 |
| NM_173779 | Ankrd58       |        | 8 |
| NM_173789 | Helt          |        | 8 |
| NM_175105 | Aqp11         |        | 8 |
| NM_175263 | Notum         |        | 8 |
| NM_175315 | Ceacam15      |        | 8 |
| NM_175349 | Ldhal6b       |        | 8 |
| NM_175408 | Tmem139       |        | 8 |
| NM_177045 | Cc2d1b        |        | 8 |
| NM_177115 |               | 3-Mar  | 8 |
| NM_177244 | Fastkd1       |        | 8 |
| NM_177344 | Tmem203       |        | 8 |
| NM_177367 | Gemin4        |        | 8 |
| NM_177544 | Ang4          |        | 8 |
| NM_177601 | Tmem60        |        | 8 |
| NM_177656 | 6820408C15Rik |        | 8 |
| NM_177759 | Ccdc60        |        | 8 |
| NM_177843 | Gm14461       |        | 8 |
| NM_177859 | Aknad1        |        | 8 |
| NM_177910 | Gmppb         |        | 8 |
| NM_178070 | Vps33b        |        | 8 |
| NM_178412 | BC051070      |        | 8 |

|              |               |   |
|--------------|---------------|---|
| NM_178600    | Vkorc1        | 8 |
| NM_181414    | Pik3c3        | 8 |
| NM_183088    | 2410018M08Rik | 8 |
| NM_183094    | Xlr4c         | 8 |
| NM_183104    | 4931429L15Rik | 8 |
| NM_183123    | Spink1        | 8 |
| NM_183316    | Snapc5        | 8 |
| NM_183390    | Klh16         | 8 |
| NM_197980    | Cox19         | 8 |
| NM_197982    | Ddx39         | 8 |
| NM_198171    | Ces2b         | 8 |
| NM_198246    | Yars2         | 8 |
| NM_198611    | B3gnt4        | 8 |
| NM_198653    | Iars2         | 8 |
| NM_198655    | 4921509C19Rik | 8 |
| NM_198657    | Gm5148        | 8 |
| NM_198957    | C430048L16Rik | 8 |
| NM_199148    | BC051665      | 8 |
| NM_199150    | BC049730      | 8 |
| NM_199152    | Obscn         | 8 |
| NM_199304    | Zfp341        | 8 |
| NM_201410    | Ugt1a6b       | 8 |
| NM_207233    | C1ql2         | 8 |
| NM_207262    | Abpe          | 8 |
| NM_213729    | Inca1         | 8 |
| NR_001579    | Terc          | 8 |
| NR_002173    | Snord15b      | 8 |
| NR_002445    | BC002163      | 8 |
| NR_028426    | Gm5129        | 8 |
| NR_030459    | Mir687        | 8 |
| NR_030498    | Mir450b       | 8 |
| NR_030674    | Gm4532        | 8 |
| NR_030729    | Gm3434        | 8 |
| NR_030730    | Gm3428        | 8 |
| NR_033689    | Gm7550        | 8 |
| NR_036591    | 1700028M03Rik | 8 |
| NM_001001177 | BC051142      | 7 |
| NM_001004157 | Scarf1        | 7 |
| NM_001005370 | Spin2         | 7 |
| NM_001008233 | Plekhn1       | 7 |
| NM_001008422 | Scaf1         | 7 |
| NM_001008497 | P2ry14        | 7 |
| NM_001009575 | Armex5        | 7 |
| NM_001009940 | I119          | 7 |
| NM_001012323 | Mup20         | 7 |
| NM_001012396 | Ptpla         | 7 |
| NM_001012725 | Wfde6b        | 7 |
| NM_001013382 | Lrrc52        | 7 |
| NM_001013829 | Shf           | 7 |
| NM_001024645 | Lrrc16b       | 7 |
| NM_001024706 | Gm5458        | 7 |
| NM_001025085 | Gm5797        | 7 |
| NM_001025364 | Rtn2          | 7 |
| NM_001029938 | Rilp          | 7 |



|              |               |   |
|--------------|---------------|---|
| NM_001033212 | Rprml         | 7 |
| NM_001033240 | Wfdc6a        | 7 |
| NM_001033264 | Gls2          | 7 |
| NM_001033302 | Gm129         | 7 |
| NM_001033304 | 5330417C22Rik | 7 |
| NM_001033314 | Ccdc61        | 7 |
| NM_001033325 | A630095E13Rik | 7 |
| NM_001033423 | Gm773         | 7 |
| NM_001033539 | Bex6          | 7 |
| NM_001033630 | 2310061I04Rik | 7 |
| NM_001033790 | B020004J07Rik | 7 |
| NM_001033805 | G630016D24Rik | 7 |
| NM_001034904 | Gm5891        | 7 |
| NM_001039363 | Tsc2          | 7 |
| NM_001039385 | Vgf           | 7 |
| NM_001039519 | Gtf2a2        | 7 |
| NM_001039557 | 4922505G16Rik | 7 |
| NM_001039889 | Smok3b        | 7 |
| NM_001044751 | Hsd11b1       | 7 |
| NM_001045524 | AK129341      | 7 |
| NM_001046637 | Snrpa         | 7 |
| NM_001080965 | Aurkc         | 7 |
| NM_001081025 | 4932425I24Rik | 7 |
| NM_001081044 | Mylk2         | 7 |
| NM_001081072 | Slc27a6       | 7 |
| NM_001081188 | Exosc7        | 7 |
| NM_001081335 | Cu19          | 7 |
| NM_001081336 | Dgkh          | 7 |
| NM_001081382 | Zfp777        | 7 |
| NM_001081437 | Fbln2         | 7 |
| NM_001081441 | Wdr86         | 7 |
| NM_001081471 | Gm10035       | 7 |
| NM_001081642 | Xlr4a         | 7 |
| NM_001082531 | Pla2g2a       | 7 |
| NM_001082975 | Sdr39u1       | 7 |
| NM_001083922 | Wbp1          | 7 |
| NM_001083934 | Myom1         | 7 |
| NM_001085378 | Myh7b         | 7 |
| NM_001085525 | Gm14511       | 7 |
| NM_001099217 | Ly6c2         | 7 |
| NM_001099306 | Gm6890        | 7 |
| NM_001099326 | Gm14458       | 7 |
| NM_001100182 | Cyp2j12       | 7 |
| NM_001100606 | Adat3         | 7 |
| NM_001101506 | Gm5151        | 7 |
| NM_001102613 | Phldb3        | 7 |
| NM_001102615 | Kif19a        | 7 |
| NM_001104525 | Cyp2c69       | 7 |
| NM_001105254 | Gm10436       | 7 |
| NM_001109909 | Srrt          | 7 |
| NM_001109995 | Eftud2        | 7 |
| NM_001110233 | Ngfrap1       | 7 |
| NM_001111111 | Atg16l2       | 7 |
| NM_001111293 | Xlr5b         | 7 |

|              |               |   |
|--------------|---------------|---|
| NM_001114157 | Rhox3h        | 7 |
| NM_001122873 | Ubl7          | 7 |
| NM_001126321 | Gm14743       | 7 |
| NM_001127330 | Pparg         | 7 |
| NM_001130174 | Tnnt2         | 7 |
| NM_001130194 | Best2         | 7 |
| NM_001130868 | Kars          | 7 |
| NM_001142727 | 1110065P20Rik | 7 |
| NM_001145038 | Gm2933        | 7 |
| NM_001145452 | Arhgef33      | 7 |
| NM_001145879 | Atp6ap11      | 7 |
| NM_001159487 | Rbp4          | 7 |
| NM_001160096 | Cldn10        | 7 |
| NM_001160356 | AI462493      | 7 |
| NM_001161366 | Tdrd6         | 7 |
| NM_001161816 | Gm15455       | 7 |
| NM_001162925 | Nudt17        | 7 |
| NM_001162944 | Gm10318       | 7 |
| NM_001162956 | Ccdc138       | 7 |
| NM_001162974 | Lrrc51        | 7 |
| NM_001163019 | A430005L14Rik | 7 |
| NM_001163165 | Hmg20b        | 7 |
| NM_001163317 | Clrn2         | 7 |
| NM_001163701 | Rpap1         | 7 |
| NM_001163704 | Fbxo6         | 7 |
| NM_001163713 | Tufm          | 7 |
| NM_001163742 | Nlrx1         | 7 |
| NM_001163750 | Spsb3         | 7 |
| NM_001163766 | Wdr90         | 7 |
| NM_001164289 | Gm6907        | 7 |
| NM_001164526 | Mup11         | 7 |
| NM_001164658 | Catsperg1     | 7 |
| NM_001164679 | Ano8          | 7 |
| NM_001164696 | Klk6          | 7 |
| NM_001167913 | Smok2b        | 7 |
| NM_001167946 | Zfp821        | 7 |
| NM_001168244 | Syce2         | 7 |
| NM_001172113 | Traf7         | 7 |
| NM_001172117 | Hck           | 7 |
| NM_001173460 | Sirpb1b       | 7 |
| NM_001177373 | Klk11         | 7 |
| NM_001177527 | Zfp964        | 7 |
| NM_001177537 | Gm11562       | 7 |
| NM_001177577 | Gm1045        | 7 |
| NM_001177627 | Slc2a6        | 7 |
| NM_001177858 | Trim43c       | 7 |
| NM_001177874 | Gps1          | 7 |
| NM_001177945 | 1810020D17Rik | 7 |
| NM_001190343 | Ccm2          | 7 |
| NM_001191044 | Ddx43         | 7 |
| NM_001199213 | Serpinb12     | 7 |
| NM_001199696 | Bai2          | 7 |
| NM_001200013 | 1700013H16Rik | 7 |
| NM_001200028 | 1700027A23Rik | 7 |

|              |            |   |
|--------------|------------|---|
| NM_001201364 | Gm10662    | 7 |
| NM_001201378 | Ccdc136    | 7 |
| NM_001205343 | Papln      | 7 |
| NM_007383    | Acads      | 7 |
| NM_007522    | Bad        | 7 |
| NM_007531    | Phb2       | 7 |
| NM_007546    | Bik        | 7 |
| NM_007576    | C4bp       | 7 |
| NM_007628    | Ccna1      | 7 |
| NM_007655    | Cd79a      | 7 |
| NM_007683    | Cenpc1     | 7 |
| NM_007718    | Ccr111     | 7 |
| NM_007894    | Ear1       | 7 |
| NM_007898    | Ebp        | 7 |
| NM_007946    | Epx        | 7 |
| NM_008004    | Fgf17      | 7 |
| NM_008005    | Fgf18      | 7 |
| NM_008032    | Aff2       | 7 |
| NM_008035    | Folr2      | 7 |
| NM_008039    | Fpr2       | 7 |
| NM_008076    | Gabrr2     | 7 |
| NM_008113    | Arhgdig    | 7 |
| NM_008166    | Grid1      | 7 |
| NM_008237    | Hes3       | 7 |
| NM_008247    | Ppap2a     | 7 |
| NM_008280    | Lipc       | 7 |
| NM_008299    | Dnajb3     | 7 |
| NM_008342    | Igfbp2     | 7 |
| NM_008354    | I112rb2    | 7 |
| NM_008431    | Kcnk4      | 7 |
| NM_008491    | Lcn2       | 7 |
| NM_008495    | Lgals1     | 7 |
| NM_008523    | Ltk        | 7 |
| NM_008567    | Mcm6       | 7 |
| NM_008571    | Mcpt2      | 7 |
| NM_008597    | Mgp        | 7 |
| NM_008613    | Mns1       | 7 |
| NM_008647    | Mup2       | 7 |
| NM_008648    | Mup4       | 7 |
| NM_008838    | Pigf       | 7 |
| NM_008925    | Prkcsb     | 7 |
| NM_008979    | Ptpn22     | 7 |
| NM_008992    | Abcd4      | 7 |
| NM_009028    | Ras12-9-ps | 7 |
| NM_009073    | Rom1       | 7 |
| NM_009138    | Cc125      | 7 |
| NM_009224    | Snrnp70    | 7 |
| NM_009273    | Srp14      | 7 |
| NM_009336    | Vps72      | 7 |
| NM_009343    | Phf1       | 7 |
| NM_009349    | Inmt       | 7 |
| NM_009434    | Phlda2     | 7 |
| NM_009450    | Tubb2a     | 7 |
| NM_009544    | Zfp105     | 7 |

|           |           |   |
|-----------|-----------|---|
| NM_009558 | Zfp51     | 7 |
| NM_009611 | Act17a    | 7 |
| NM_009618 | Adam2     | 7 |
| NM_009619 | Adam3     | 7 |
| NM_009636 | Aebp1     | 7 |
| NM_009658 | Akr1b3    | 7 |
| NM_009705 | Arg2      | 7 |
| NM_009734 | Azi1      | 7 |
| NM_009752 | Glb1      | 7 |
| NM_009773 | Bub1b     | 7 |
| NM_009837 | Cct4      | 7 |
| NM_009841 | Cd14      | 7 |
| NM_009883 | Cebpb     | 7 |
| NM_009892 | Chi3l3    | 7 |
| NM_009942 | Cox5b     | 7 |
| NM_009976 | Cst3      | 7 |
| NM_009979 | Cst9      | 7 |
| NM_010027 | Ddt       | 7 |
| NM_010162 | Ext1      | 7 |
| NM_010210 | Fhit      | 7 |
| NM_010226 | Foxs1     | 7 |
| NM_010364 | Gtf2h4    | 7 |
| NM_010489 | Hyal2     | 7 |
| NM_010491 | Iapp      | 7 |
| NM_010564 | Inha      | 7 |
| NM_010654 | Klrd1     | 7 |
| NM_010692 | Lbx2      | 7 |
| NM_010701 | Lect1     | 7 |
| NM_010844 | Muc5ac    | 7 |
| NM_010860 | Myl6      | 7 |
| NM_010885 | Ndufa2    | 7 |
| NM_011125 | Pltp      | 7 |
| NM_011126 | Plunc     | 7 |
| NM_011147 | Ppef1     | 7 |
| NM_011149 | Ppib      | 7 |
| NM_011155 | Ppp5c     | 7 |
| NM_011166 | Prl6a1    | 7 |
| NM_011171 | Procr     | 7 |
| NM_011259 | Reg3a     | 7 |
| NM_011293 | Polr2j    | 7 |
| NM_011337 | Ccl3      | 7 |
| NM_011353 | Serfl     | 7 |
| NM_011405 | Slc7a7    | 7 |
| NM_011458 | Serpina3k | 7 |
| NM_011467 | Spr       | 7 |
| NM_011532 | Tbx1      | 7 |
| NM_011582 | Thbs4     | 7 |
| NM_011624 | Top3b     | 7 |
| NM_011671 | Ucp2      | 7 |
| NM_011795 | C1ql1     | 7 |
| NM_011870 | Cib1      | 7 |
| NM_011885 | Mrps12    | 7 |
| NM_011909 | Usp18     | 7 |
| NM_011966 | Psma4     | 7 |

|           |               |   |
|-----------|---------------|---|
| NM_011991 | Cops3         | 7 |
| NM_012049 | Nit1          | 7 |
| NM_012055 | Asns          | 7 |
| NM_012065 | Pde6g         | 7 |
| NM_013465 | Ahsg          | 7 |
| NM_013467 | Aldh1a1       | 7 |
| NM_013481 | Bop1          | 7 |
| NM_013523 | Fshr          | 7 |
| NM_013534 | Leprel2       | 7 |
| NM_013633 | Pou5f1        | 7 |
| NM_013678 | Surf2         | 7 |
| NM_013759 | Sepx1         | 7 |
| NM_013778 | Akr1c13       | 7 |
| NM_013793 | Klra15        | 7 |
| NM_013902 | Fkbp3         | 7 |
| NM_013913 | Angpt13       | 7 |
| NM_014194 | Klra7         | 7 |
| NM_015803 | Atp8a2        | 7 |
| NM_016704 | C6            | 7 |
| NM_016794 | Vamp8         | 7 |
| NM_016905 | Galk1         | 7 |
| NM_018751 | Sult1c1       | 7 |
| NM_019395 | Fbp1          | 7 |
| NM_019482 | Panx1         | 7 |
| NM_019719 | Stub1         | 7 |
| NM_019832 | Gkap1         | 7 |
| NM_019991 | Pr12a1        | 7 |
| NM_020013 | Fgf21         | 7 |
| NM_020035 | Pigo          | 7 |
| NM_020051 | Asc13         | 7 |
| NM_020262 | Zfp109        | 7 |
| NM_021273 | Ckb           | 7 |
| NM_021351 | Cryba4        | 7 |
| NM_021365 | Xlr4b         | 7 |
| NM_021545 | Naip7         | 7 |
| NM_022411 | Slc13a2       | 7 |
| NM_023167 | Mrpl4         | 7 |
| NM_023231 | Stoml2        | 7 |
| NM_023440 | Tmem86b       | 7 |
| NM_023493 | Cml5          | 7 |
| NM_023514 | Mrps9         | 7 |
| NM_023566 | Muc2          | 7 |
| NM_023580 | Epha1         | 7 |
| NM_023734 | Pi16          | 7 |
| NM_024437 | Nudt7         | 7 |
| NM_025281 | Lyar          | 7 |
| NM_025337 | Akr7a5        | 7 |
| NM_025343 | Rmnd1         | 7 |
| NM_025349 | Lsm7          | 7 |
| NM_025355 | Tceal6        | 7 |
| NM_025402 | 1110031I02Rik | 7 |
| NM_025414 | Myo19         | 7 |
| NM_025416 | Them5         | 7 |
| NM_025465 | 1810029B16Rik | 7 |

|           |               |   |
|-----------|---------------|---|
| NM_025490 | 1700010M22Rik | 7 |
| NM_025492 | 1700020L24Rik | 7 |
| NM_025501 | Lce3b         | 7 |
| NM_025520 | Lsm5          | 7 |
| NM_025560 | 1810049H13Rik | 7 |
| NM_025598 | Ppdpf         | 7 |
| NM_025604 | Psmg3         | 7 |
| NM_025654 | Rdm1          | 7 |
| NM_025684 | Nepn          | 7 |
| NM_025732 | Ankrd61       | 7 |
| NM_025736 | Ttc35         | 7 |
| NM_025768 | Grtp1         | 7 |
| NM_025786 | Rnf186        | 7 |
| NM_025825 | Appbp2        | 7 |
| NM_025894 | Psmd12        | 7 |
| NM_025957 | Ceacam14      | 7 |
| NM_026015 | Zmat5         | 7 |
| NM_026092 | Lyz11         | 7 |
| NM_026094 | Atp8b3        | 7 |
| NM_026187 | Ankzf1        | 7 |
| NM_026219 | Uqcrb         | 7 |
| NM_026248 | 4930430A15Rik | 7 |
| NM_026418 | Rgs10         | 7 |
| NM_026467 | Rps271        | 7 |
| NM_026498 | Mrps11        | 7 |
| NM_026502 | 1110004E09Rik | 7 |
| NM_026508 | Trap1         | 7 |
| NM_026526 | N6amt2        | 7 |
| NM_026539 | Chd11         | 7 |
| NM_026547 | 1520402A15Rik | 7 |
| NM_026571 | Lhfp15        | 7 |
| NM_026703 | Ndufa8        | 7 |
| NM_026744 | Mrpl53        | 7 |
| NM_026818 | Cilp2         | 7 |
| NM_026822 | Lcelb         | 7 |
| NM_026858 | Xrcc6bp1      | 7 |
| NM_026876 | 1190005F20Rik | 7 |
| NM_026944 | Alkbh3        | 7 |
| NM_026979 | Clqtnf2       | 7 |
| NM_027037 | 1700007K09Rik | 7 |
| NM_027056 | 1700012P22Rik | 7 |
| NM_027070 | 1700019A02Rik | 7 |
| NM_027074 | 1700025F22Rik | 7 |
| NM_027112 | Capns2        | 7 |
| NM_027206 | Tnfaip812     | 7 |
| NM_027211 | Anxa13        | 7 |
| NM_027256 | Ints4         | 7 |
| NM_027257 | Obfc2b        | 7 |
| NM_027261 | Taf1d         | 7 |
| NM_027276 | Cdc16         | 7 |
| NM_027304 | H1fnt         | 7 |
| NM_027480 | Ankrd24       | 7 |
| NM_027541 | Prpf3         | 7 |
| NM_027584 | Slco6d1       | 7 |

|           |               |   |
|-----------|---------------|---|
| NM_027704 | Zdhhc11       | 7 |
| NM_027721 | Katnal2       | 7 |
| NM_027817 | Grap          | 7 |
| NM_027819 | Ggt6          | 7 |
| NM_027925 | Trnaulap      | 7 |
| NM_027997 | Serpina9      | 7 |
| NM_028118 | Wdsub1        | 7 |
| NM_028295 | Pdia5         | 7 |
| NM_028446 | Trip11        | 7 |
| NM_028448 | Cenpv         | 7 |
| NM_028500 | Calr3         | 7 |
| NM_028607 | Bloc1s2       | 7 |
| NM_028807 | 1200009I06Rik | 7 |
| NM_028825 | 1700011F03Rik | 7 |
| NM_028852 | Spatc1        | 7 |
| NM_028916 | Efhc2         | 7 |
| NM_028964 | Snx29         | 7 |
| NM_029104 | Zmynd17       | 7 |
| NM_029141 | 4930511M11Rik | 7 |
| NM_029142 | 4930502E18Rik | 7 |
| NM_029150 | Spata16       | 7 |
| NM_029342 | Nhej1         | 7 |
| NM_029360 | Tm4sf5        | 7 |
| NM_029384 | 2210411K11Rik | 7 |
| NM_029455 | 4930525F21Rik | 7 |
| NM_029459 | Prame         | 7 |
| NM_029537 | Tmem98        | 7 |
| NM_029562 | Cyp2d26       | 7 |
| NM_029585 | Det1          | 7 |
| NM_029662 | Mfsd2a        | 7 |
| NM_029706 | Cpb1          | 7 |
| NM_029748 | 2510006D16Rik | 7 |
| NM_029756 | Sdccag8       | 7 |
| NM_029942 | Preli2        | 7 |
| NM_029949 | Snapc3        | 7 |
| NM_030137 | Cstad         | 7 |
| NM_030741 | Vmn1r62       | 7 |
| NM_031161 | Cck           | 7 |
| NM_031168 | I16           | 7 |
| NM_031201 | Tsta3         | 7 |
| NM_031254 | Trem2         | 7 |
| NM_031406 | Slc12a9       | 7 |
| NM_032398 | Plvap         | 7 |
| NM_033175 | Lce3c         | 7 |
| NM_033607 | Uchl4         | 7 |
| NM_053113 | Ear11         | 7 |
| NM_053118 | Gpre5d        | 7 |
| NM_053140 | Pcdhb15       | 7 |
| NM_053152 | Klra22        | 7 |
| NM_053208 | Egln2         | 7 |
| NM_053250 | Crip3         | 7 |
| NM_054094 | Acsml         | 7 |
| NM_054095 | Necab2        | 7 |
| NM_054103 | Stk33         | 7 |

|           |               |   |
|-----------|---------------|---|
| NM_080420 | Lpo           | 7 |
| NM_080469 | Eri3          | 7 |
| NM_133203 | Klra17        | 7 |
| NM_133204 | Zscan5b       | 7 |
| NM_133749 | 2900064A13Rik | 7 |
| NM_133923 | Tt113         | 7 |
| NM_133977 | Trf           | 7 |
| NM_134059 | Ddx41         | 7 |
| NM_134066 | Akr1c18       | 7 |
| NM_134114 | Sft2d1        | 7 |
| NM_134127 | Cyp4f15       | 7 |
| NM_134256 | AB056442      | 7 |
| NM_138655 | Tmc2          | 7 |
| NM_138669 | Eif4a3        | 7 |
| NM_138686 | Cys1          | 7 |
| NM_144816 | Rhbd11        | 7 |
| NM_144909 | Gckr          | 7 |
| NM_145140 | Abcc10        | 7 |
| NM_145156 | Slc25a28      | 7 |
| NM_145216 | Ras110a       | 7 |
| NM_145368 | Acnat2        | 7 |
| NM_145422 | D10Wsu52e     | 7 |
| NM_145424 | BC089597      | 7 |
| NM_145425 | Wdpep         | 7 |
| NM_145438 | Llg12         | 7 |
| NM_145466 | A21d1         | 7 |
| NM_145710 | Obox6         | 7 |
| NM_145713 | Hist1h1d      | 7 |
| NM_145926 | Mgat4b        | 7 |
| NM_145929 | Ggal          | 7 |
| NM_145939 | Alg3          | 7 |
| NM_145960 | Mtrf1         | 7 |
| NM_146052 | Lrrc3b        | 7 |
| NM_146100 | Ina           | 7 |
| NM_146142 | Tdrd7         | 7 |
| NM_146202 | Zfp768        | 7 |
| NM_146240 | Rassf9        | 7 |
| NM_146242 | Lrrc10        | 7 |
| NM_146251 | Pnpla7        | 7 |
| NM_146787 | Olfir920      | 7 |
| NM_147018 | Olfir1056     | 7 |
| NM_152922 | Egf18         | 7 |
| NM_153126 | Nat10         | 7 |
| NM_153137 | Traf3ip3      | 7 |
| NM_153172 | Prss45        | 7 |
| NM_153786 | Vgl12         | 7 |
| NM_170592 | Mettl11a      | 7 |
| NM_172126 | Adam1a        | 7 |
| NM_172133 | Adap2         | 7 |
| NM_172265 | Eif2b5        | 7 |
| NM_172463 | Sned1         | 7 |
| NM_172521 | BC125332      | 7 |
| NM_172825 | Gpr128        | 7 |
| NM_172832 | Pcyox11       | 7 |



|           |               |   |
|-----------|---------------|---|
| NM_172894 | Ppp6r1        | 7 |
| NM_172904 | Fsd2          | 7 |
| NM_172909 | Cd16311       | 7 |
| NM_172990 | Pank4         | 7 |
| NM_173011 | Idh2          | 7 |
| NM_173052 | Serpin1b      | 7 |
| NM_173409 | 4933402N03Rik | 7 |
| NM_173440 | Nripl         | 7 |
| NM_174960 | Gimap9        | 7 |
| NM_174991 | Bail          | 7 |
| NM_175011 | E330017A01Rik | 7 |
| NM_175158 | Utp20         | 7 |
| NM_175228 | 4930578C19Rik | 7 |
| NM_175638 | Wnk4          | 7 |
| NM_175654 | Hist1h4d      | 7 |
| NM_176976 | 5830418K08Rik | 7 |
| NM_177184 | Vps13c        | 7 |
| NM_177214 | Snrnp200      | 7 |
| NM_177312 | 6330408A02Rik | 7 |
| NM_177446 | Abpz          | 7 |
| NM_177607 | 4933430I17Rik | 7 |
| NM_177684 | Zfp637        | 7 |
| NM_177719 | Morc2b        | 7 |
| NM_177742 | Triml1        | 7 |
| NM_177890 | Gm5114        | 7 |
| NM_177922 | Mapk15        | 7 |
| NM_178206 | Hist1h3h      | 7 |
| NM_178244 | Teddm1        | 7 |
| NM_178250 | Pramel7       | 7 |
| NM_178252 | Arhgap33      | 7 |
| NM_178255 | Hapln3        | 7 |
| NM_178440 | Myo1g         | 7 |
| NM_178657 | Oog1          | 7 |
| NM_178919 | Lmf2          | 7 |
| NM_181405 | Rnpepl1       | 7 |
| NM_181470 | Ltv1          | 7 |
| NM_181564 | Dsg4          | 7 |
| NM_181848 | Optn          | 7 |
| NM_183136 | Spink8        | 7 |
| NM_183275 | 1110002N22Rik | 7 |
| NM_183276 | Nbeal2        | 7 |
| NM_183321 | BC053749      | 7 |
| NM_194333 | Slc23a3       | 7 |
| NM_194348 | Atg2a         | 7 |
| NM_198166 | Uts2d         | 7 |
| NM_198191 | Pip5k1l       | 7 |
| NM_198298 | Helz          | 7 |
| NM_198410 | Paqr6         | 7 |
| NM_198422 | Paqr3         | 7 |
| NM_198630 | 1810024B03Rik | 7 |
| NM_198886 | Zbtb12        | 7 |
| NM_198961 | Vmn2r43       | 7 |
| NM_199035 | Alg8          | 7 |
| NM_199197 | Rbfa          | 7 |

|              |               |   |
|--------------|---------------|---|
| NM_199305    | Tmem39b       | 7 |
| NM_199312    | BC051628      | 7 |
| NM_205819    | Tlr11         | 7 |
| NM_207239    | Gtf3c1        | 7 |
| NR_015510    | 4632427E13Rik | 7 |
| NR_028559    | Snord111      | 7 |
| NR_029912    | Mir196b       | 7 |
| NR_035528    | Mir767        | 7 |
| NM_001001322 | Adamts13      | 6 |
| NM_001001493 | BC056474      | 6 |
| NM_001003393 | Igf13         | 6 |
| NM_001003952 | Sval3         | 6 |
| NM_001004359 | Gprasp1       | 6 |
| NM_001004721 | Pigu          | 6 |
| NM_001005371 | Gm13084       | 6 |
| NM_001005509 | Eif2a         | 6 |
| NM_001007569 | Pnmal1        | 6 |
| NM_001009549 | Zfp3613       | 6 |
| NM_001009951 | BC088983      | 6 |
| NM_001012640 | AY761185      | 6 |
| NM_001013256 | 1500010J02Rik | 6 |
| NM_001013820 | Gm5631        | 6 |
| NM_001024478 | Cdhr3         | 6 |
| NM_001024624 | Cdk15         | 6 |
| NM_001025353 | Gm6040        | 6 |
| NM_001029872 | Itgad         | 6 |
| NM_001029977 | Gm4788        | 6 |
| NM_001033123 | Gm14288       | 6 |
| NM_001033141 | Ecscr         | 6 |
| NM_001033166 | 2700094K13Rik | 6 |
| NM_001033266 | Gm525         | 6 |
| NM_001033284 | BC026585      | 6 |
| NM_001033293 | Uap111        | 6 |
| NM_001033345 | Gm216         | 6 |
| NM_001033452 | Accs1         | 6 |
| NM_001033460 | Ccdc164       | 6 |
| NM_001033533 | Ccdc102a      | 6 |
| NM_001033765 | 1700071K01Rik | 6 |
| NM_001033820 | Zfp551        | 6 |
| NM_001033981 | Hbq1b         | 6 |
| NM_001036740 | B3gnt8        | 6 |
| NM_001037248 | Gm5156        | 6 |
| NM_001037298 | Fam38a        | 6 |
| NM_001037709 | Rusc2         | 6 |
| NM_001039124 | Kncn          | 6 |
| NM_001039243 | Gm7092        | 6 |
| NM_001039543 | Mlf1          | 6 |
| NM_001039555 | Cyp2c68       | 6 |
| NM_001039824 | Fdx11         | 6 |
| NM_001042670 | Gm9897        | 6 |
| NM_001044371 | Rad17         | 6 |
| NM_001045521 | Prss38        | 6 |
| NM_001077411 | Gba           | 6 |
| NM_001077529 | Nme2          | 6 |

|              |               |   |
|--------------|---------------|---|
| NM_001080384 | Clta          | 6 |
| NM_001081054 | Qrs11         | 6 |
| NM_001081157 | Lmod3         | 6 |
| NM_001081210 | Mrpl44        | 6 |
| NM_001081275 | 1700009P17Rik | 6 |
| NM_001081309 | Pik3r4        | 6 |
| NM_001081372 | Ces1b         | 6 |
| NM_001081695 | Dnmt31        | 6 |
| NM_001082548 | Spint2        | 6 |
| NM_001082573 | Crygc         | 6 |
| NM_001083315 | St7           | 6 |
| NM_001099321 | Gm15023       | 6 |
| NM_001100464 | Abpb          | 6 |
| NM_001101503 | A230065H16Rik | 6 |
| NM_001102409 | Kng2          | 6 |
| NM_001103367 | Rai2          | 6 |
| NM_001105557 | Zfp938        | 6 |
| NM_001105667 | Dtymk         | 6 |
| NM_001110211 | Anxa6         | 6 |
| NM_001110251 | Hmbs          | 6 |
| NM_001110320 | Cd72          | 6 |
| NM_001111142 | Gm88          | 6 |
| NM_001112722 | Arhgef101     | 6 |
| NM_001112725 | Aldh3a1       | 6 |
| NM_001113424 | Amn1          | 6 |
| NM_001122647 | Mup10         | 6 |
| NM_001122678 | Gm3286        | 6 |
| NM_001122958 | Rad54l        | 6 |
| NM_001127351 | Sirt3         | 6 |
| NM_001127376 | Wisp3         | 6 |
| NM_001128597 | Gpank1        | 6 |
| NM_001135567 | 1190007I07Rik | 6 |
| NM_001136057 | Cpne6         | 6 |
| NM_001142969 | A630073D07Rik | 6 |
| NM_001143755 | Lrrc27        | 6 |
| NM_001145406 | Rhox3g-ps     | 6 |
| NM_001145863 | Gm14139       | 6 |
| NM_001145900 | Btbd6         | 6 |
| NM_001146689 | Ezh2          | 6 |
| NM_001159275 | Slc25a2       | 6 |
| NM_001159565 | Dctn3         | 6 |
| NM_001159632 | Atp6v1c2      | 6 |
| NM_001159905 | Zfand2b       | 6 |
| NM_001161738 | Glmn          | 6 |
| NM_001161853 | Smarb1        | 6 |
| NM_001162883 | Apo19a        | 6 |
| NM_001162996 | Em12          | 6 |
| NM_001163143 | C2cd4a        | 6 |
| NM_001163300 | Safb          | 6 |
| NM_001163431 | 1810006K21Rik | 6 |
| NM_001163559 | Lrriq1        | 6 |
| NM_001163638 | Ttc18         | 6 |
| NM_001163769 | U2af1         | 6 |
| NM_001164034 | Ntf3          | 6 |

|              |               |   |
|--------------|---------------|---|
| NM_001164480 | Sipal         | 6 |
| NM_001164564 | Egf17         | 6 |
| NM_001164708 | Hspb2         | 6 |
| NM_001166437 | Tbc1d25       | 6 |
| NM_001166619 | Fmr1nb        | 6 |
| NM_001167673 | Pate-e        | 6 |
| NM_001167736 | Chchd6        | 6 |
| NM_001167763 | Ift122        | 6 |
| NM_001167898 | Frem3         | 6 |
| NM_001168591 | Lonp2         | 6 |
| NM_001168672 | Gtsel         | 6 |
| NM_001177437 | 1700016M24Rik | 6 |
| NM_001177468 | Gm7325        | 6 |
| NM_001177775 | H60b          | 6 |
| NM_001177798 | Taf6l         | 6 |
| NM_001177901 | Zfp513        | 6 |
| NM_001177965 | Naa10         | 6 |
| NM_001178038 | Fmo6          | 6 |
| NM_001190444 | Aamp          | 6 |
| NM_001195421 | Hist1h4m      | 6 |
| NM_001195537 | Gm10345       | 6 |
| NM_001195674 | Gm600         | 6 |
| NM_001199045 | Tubd1         | 6 |
| NM_001199090 | 4930522H14Rik | 6 |
| NM_001199118 | Lpin3         | 6 |
| NM_001199333 | LOC100048884  | 6 |
| NM_001199336 | Gm5894        | 6 |
| NM_001199948 | Dynl1le       | 6 |
| NM_001199999 | Mup14         | 6 |
| NM_001200004 | Mup15         | 6 |
| NM_001201395 | 4930468A15Rik | 6 |
| NM_001205070 | Josd2         | 6 |
| NM_001205156 | Yipf1         | 6 |
| NM_001205322 | Pr13d1        | 6 |
| NM_001205336 | Arap3         | 6 |
| NM_007443    | Ambp          | 6 |
| NM_007482    | Arg1          | 6 |
| NM_007534    | Bcl2alb       | 6 |
| NM_007536    | Bcl2ald       | 6 |
| NM_007609    | Casp4         | 6 |
| NM_007621    | Cbr2          | 6 |
| NM_007776    | Crygd         | 6 |
| NM_007777    | Cryge         | 6 |
| NM_007801    | Ctsh          | 6 |
| NM_007825    | Cyp7b1        | 6 |
| NM_007867    | Dlx4          | 6 |
| NM_007878    | Drd4          | 6 |
| NM_007881    | Atn1          | 6 |
| NM_007886    | Dtnb          | 6 |
| NM_007910    | Efna4         | 6 |
| NM_007969    | Expi          | 6 |
| NM_007986    | Fap           | 6 |
| NM_008101    | Gcgr          | 6 |
| NM_008214    | Hars          | 6 |

|           |           |   |
|-----------|-----------|---|
| NM_008221 | Hbb-y     | 6 |
| NM_008277 | Hpd       | 6 |
| NM_008279 | Map4k1    | 6 |
| NM_008404 | Itgb2     | 6 |
| NM_008416 | Junb      | 6 |
| NM_008432 | Kcnu1     | 6 |
| NM_008486 | Anpep     | 6 |
| NM_008533 | Cd180     | 6 |
| NM_008550 | Man2b2    | 6 |
| NM_008586 | Mep1b     | 6 |
| NM_008653 | Mybpc3    | 6 |
| NM_008664 | Myom2     | 6 |
| NM_008700 | Nkx2-5    | 6 |
| NM_008721 | Npdc1     | 6 |
| NM_008725 | Nppa      | 6 |
| NM_008757 | Odf1      | 6 |
| NM_008774 | Pabpc1    | 6 |
| NM_008877 | Plg       | 6 |
| NM_008907 | Ppia      | 6 |
| NM_008922 | Prim2     | 6 |
| NM_008993 | Pxmp2     | 6 |
| NM_009016 | Raet1a    | 6 |
| NM_009018 | Raet1c    | 6 |
| NM_009059 | Rgl2      | 6 |
| NM_009117 | Saa1      | 6 |
| NM_009136 | Scrg1     | 6 |
| NM_009200 | Slc1a6    | 6 |
| NM_009253 | Serpina3m | 6 |
| NM_009272 | Srm       | 6 |
| NM_009290 | Wnt8a     | 6 |
| NM_009326 | Tcea2     | 6 |
| NM_009328 | Tcf15     | 6 |
| NM_009351 | Tep1      | 6 |
| NM_009363 | Tff2      | 6 |
| NM_009375 | Tg        | 6 |
| NM_009392 | Tlx2      | 6 |
| NM_009570 | Zfy1      | 6 |
| NM_009623 | Adcy8     | 6 |
| NM_009646 | Aire      | 6 |
| NM_009663 | Alox5ap   | 6 |
| NM_009742 | Bcl2a1a   | 6 |
| NM_009900 | C1cn2     | 6 |
| NM_009969 | Csf2      | 6 |
| NM_009985 | Ctsw      | 6 |
| NM_010046 | Dgat1     | 6 |
| NM_010189 | Fcgrt     | 6 |
| NM_010213 | Fhl3      | 6 |
| NM_010285 | Ghrh      | 6 |
| NM_010294 | Gk2       | 6 |
| NM_010312 | Gnb2      | 6 |
| NM_010318 | Gng5      | 6 |
| NM_010370 | Gzma      | 6 |
| NM_010601 | Kcnh3     | 6 |
| NM_010676 | Krtap8-2  | 6 |

|           |          |   |
|-----------|----------|---|
| NM_010681 | Lama4    | 6 |
| NM_010741 | Ly6c1    | 6 |
| NM_010745 | Ly86     | 6 |
| NM_010781 | Tpsb2    | 6 |
| NM_010886 | Ndufa4   | 6 |
| NM_010920 | Nkx2-6   | 6 |
| NM_010948 | Nudc     | 6 |
| NM_010999 | Olfir56  | 6 |
| NM_011116 | Pld3     | 6 |
| NM_011134 | Pon1     | 6 |
| NM_011157 | Srgn     | 6 |
| NM_011165 | Pr14a1   | 6 |
| NM_011315 | Saa3     | 6 |
| NM_011318 | Apcs     | 6 |
| NM_011321 | Sbp      | 6 |
| NM_011421 | Smpd1    | 6 |
| NM_011461 | Spic     | 6 |
| NM_011617 | Cd70     | 6 |
| NM_011618 | Tnnt1    | 6 |
| NM_011635 | Trap1a   | 6 |
| NM_011670 | Uchl1    | 6 |
| NM_011765 | Zfp97    | 6 |
| NM_011783 | Agr2     | 6 |
| NM_011831 | Ins15    | 6 |
| NM_011835 | Katna1   | 6 |
| NM_011841 | Mapk7    | 6 |
| NM_011904 | T112     | 6 |
| NM_011906 | Tpral    | 6 |
| NM_011970 | Psmb2    | 6 |
| NM_012006 | Acot1    | 6 |
| NM_013456 | Actn3    | 6 |
| NM_013520 | Flt3l    | 6 |
| NM_013592 | Matn4    | 6 |
| NM_013679 | Svs6     | 6 |
| NM_013691 | Thbs3    | 6 |
| NM_013711 | Txnrd2   | 6 |
| NM_013777 | Akr1c12  | 6 |
| NM_013805 | Cldn5    | 6 |
| NM_013838 | Trpc6    | 6 |
| NM_013926 | Cbx8     | 6 |
| NM_015779 | Elane    | 6 |
| NM_015792 | Fbxo18   | 6 |
| NM_015809 | Krtap5-4 | 6 |
| NM_015820 | Hs6st3   | 6 |
| NM_016665 | Stral3   | 6 |
| NM_016709 | Auh      | 6 |
| NM_016723 | Uchl3    | 6 |
| NM_016752 | Slc35b1  | 6 |
| NM_016753 | Lxn      | 6 |
| NM_016800 | Vtilb    | 6 |
| NM_016974 | Dbp      | 6 |
| NM_017373 | Nfil3    | 6 |
| NM_017390 | Svs2     | 6 |
| NM_017474 | Clca3    | 6 |

|           |               |   |
|-----------|---------------|---|
| NM_018739 | Rp9           | 6 |
| NM_018740 | Rai12         | 6 |
| NM_018860 | Rpl41         | 6 |
| NM_018889 | Pigb          | 6 |
| NM_019478 | Pqbp1         | 6 |
| NM_019536 | Dnahc10       | 6 |
| NM_019539 | Cts7          | 6 |
| NM_019583 | I117rb        | 6 |
| NM_019684 | Srpk3         | 6 |
| NM_019736 | Acot9         | 6 |
| NM_019965 | Dnajb12       | 6 |
| NM_020015 | Magea1        | 6 |
| NM_020020 | Magea8        | 6 |
| NM_020030 | Raet1d        | 6 |
| NM_020032 | Poll          | 6 |
| NM_020614 | Taf1b         | 6 |
| NM_021473 | Akrla4        | 6 |
| NM_021985 | Tnfrsf18      | 6 |
| NM_022409 | Zfp296        | 6 |
| NM_022413 | Trpv6         | 6 |
| NM_022430 | Ms4a8a        | 6 |
| NM_022565 | Ndst4         | 6 |
| NM_022653 | Thop1         | 6 |
| NM_022654 | Lrdd          | 6 |
| NM_023137 | Ubd           | 6 |
| NM_023475 | Serhl         | 6 |
| NM_023622 | Rgl3          | 6 |
| NM_023630 | Gtf2a11       | 6 |
| NM_023637 | Sars2         | 6 |
| NM_023665 | D4Wsu53e      | 6 |
| NM_023684 | Lime1         | 6 |
| NM_023900 | Plekhj1       | 6 |
| NM_024171 | Sec61b        | 6 |
| NM_024178 | Alg14         | 6 |
| NM_024227 | Mrpl28        | 6 |
| NM_024231 | Zfp11         | 6 |
| NM_024406 | Fabp4         | 6 |
| NM_024432 | Ubxn6         | 6 |
| NM_025289 | Tbrg1         | 6 |
| NM_025313 | Atp5d         | 6 |
| NM_025315 | Med21         | 6 |
| NM_025384 | Dnajc15       | 6 |
| NM_025401 | Ub15          | 6 |
| NM_025410 | Lage3         | 6 |
| NM_025421 | Acyp1         | 6 |
| NM_025522 | Dhrs7         | 6 |
| NM_025537 | Tsfm          | 6 |
| NM_025539 | Nudt2         | 6 |
| NM_025596 | Preli1        | 6 |
| NM_025621 | 2310050C09Rik | 6 |
| NM_025728 | Spag16        | 6 |
| NM_025876 | Cdk5rap1      | 6 |
| NM_025899 | Uqcrc2        | 6 |
| NM_025931 | Ift27         | 6 |

|           |               |   |
|-----------|---------------|---|
| NM_025933 | Higd2a        | 6 |
| NM_025935 | Tbc1d7        | 6 |
| NM_025983 | Atp5e         | 6 |
| NM_025989 | Gp2           | 6 |
| NM_025999 | Rnf141        | 6 |
| NM_026107 | Zkscan6       | 6 |
| NM_026116 | Bbs2          | 6 |
| NM_026132 | Txndc8        | 6 |
| NM_026181 | Gpatch1       | 6 |
| NM_026309 | Lsm3          | 6 |
| NM_026310 | Mrpl18        | 6 |
| NM_026336 | 2310057J18Rik | 6 |
| NM_026429 | Tpbpb         | 6 |
| NM_026468 | Atp5g2        | 6 |
| NM_026483 | Mphosph10     | 6 |
| NM_026486 | Tctn2         | 6 |
| NM_026545 | Psmc8         | 6 |
| NM_026658 | Mto1          | 6 |
| NM_026819 | Dhrs1         | 6 |
| NM_026864 | Ras111a       | 6 |
| NM_026865 | 1700113I22Rik | 6 |
| NM_026890 | Ngdn          | 6 |
| NM_026922 | Atp2c2        | 6 |
| NM_027030 | Dcps          | 6 |
| NM_027040 | 1700007K13Rik | 6 |
| NM_027073 | 1700025E21Rik | 6 |
| NM_027130 | Afg3l2        | 6 |
| NM_027222 | 2010001M09Rik | 6 |
| NM_027343 | Cd209g        | 6 |
| NM_027544 | Ggnbp1        | 6 |
| NM_027547 | Prdm5         | 6 |
| NM_027582 | Akr1c1        | 6 |
| NM_027618 | Poteg         | 6 |
| NM_027660 | Tekt3         | 6 |
| NM_027697 | 4933413G19Rik | 6 |
| NM_027708 | Fbxo24        | 6 |
| NM_027733 | Spata24       | 6 |
| NM_027832 | Svall         | 6 |
| NM_027840 | Snx20         | 6 |
| NM_027961 | Wfdc3         | 6 |
| NM_027967 | 1700026J04Rik | 6 |
| NM_027988 | Nox1          | 6 |
| NM_028064 | Slc39a4       | 6 |
| NM_028077 | 1810055G02Rik | 6 |
| NM_028104 | Ppp1r14d      | 6 |
| NM_028180 | 1700030F18Rik | 6 |
| NM_028274 | Exosc6        | 6 |
| NM_028398 | Agxt212       | 6 |
| NM_028430 | Ppil6         | 6 |
| NM_028532 | Tepp          | 6 |
| NM_028540 | 1700057K13Rik | 6 |
| NM_028554 | 1700072E05Rik | 6 |
| NM_028622 | Lcelc         | 6 |
| NM_028742 | Ifltd1        | 6 |



|           |               |   |
|-----------|---------------|---|
| NM_028794 | Nudt9         | 6 |
| NM_028801 | Muc5b         | 6 |
| NM_028942 | Slco6c1       | 6 |
| NM_029005 | Mlk1          | 6 |
| NM_029021 | 4833422F24Rik | 6 |
| NM_029036 | S100pbp       | 6 |
| NM_029236 | Bcdin3d       | 6 |
| NM_029238 | Slc35f4       | 6 |
| NM_029271 | Mrpl32        | 6 |
| NM_029285 | 1700001C02Rik | 6 |
| NM_029288 | Gm1973        | 6 |
| NM_029344 | Acyp2         | 6 |
| NM_029345 | 2310007L24Rik | 6 |
| NM_029351 | Krtap9-3      | 6 |
| NM_029555 | Gstk1         | 6 |
| NM_029634 | Ip6k2         | 6 |
| NM_029660 | Rbmx12        | 6 |
| NM_029682 | Stambp11      | 6 |
| NM_029687 | Wdr38         | 6 |
| NM_029720 | Creld2        | 6 |
| NM_029834 | Ppp1r12c      | 6 |
| NM_029921 | Tmem213       | 6 |
| NM_029932 | Spns3         | 6 |
| NM_029964 | 6030468B19Rik | 6 |
| NM_029981 | Adamts12      | 6 |
| NM_030026 | Mccc2         | 6 |
| NM_030058 | Spint4        | 6 |
| NM_030071 | 4921528007Rik | 6 |
| NM_030084 | Gpr108        | 6 |
| NM_030707 | Fcrls         | 6 |
| NM_031190 | Pgk2          | 6 |
| NM_031404 | Actl6b        | 6 |
| NM_031868 | Ppplca        | 6 |
| NM_053127 | Pcdhb2        | 6 |
| NM_053166 | Trim7         | 6 |
| NM_053172 | Mepe          | 6 |
| NM_053177 | Mcoln1        | 6 |
| NM_053245 | Aipl1         | 6 |
| NM_053259 | Prss28        | 6 |
| NM_053264 | 4930444G20Rik | 6 |
| NM_057173 | Lmo1          | 6 |
| NM_130857 | Krtap16-5     | 6 |
| NM_130869 | Nobox         | 6 |
| NM_133246 | Ms4a3         | 6 |
| NM_133254 | Slc5a2        | 6 |
| NM_133772 | Ssbp4         | 6 |
| NM_133804 | Tmem132a      | 6 |
| NM_133881 | Tmem54        | 6 |
| NM_133882 | C8b           | 6 |
| NM_133913 | Chpf2         | 6 |
| NM_133924 | Snx21         | 6 |
| NM_133964 | Dohh          | 6 |
| NM_133980 | Slc22a13      | 6 |
| NM_134023 | Tbc1d10a      | 6 |

|           |               |   |
|-----------|---------------|---|
| NM_134040 | Ddx1          | 6 |
| NM_134187 | Vmn1r8        | 6 |
| NM_138601 | D10Jhu81e     | 6 |
| NM_139148 | Clca4         | 6 |
| NM_144546 | Zfp119a       | 6 |
| NM_144793 | Slc25a38      | 6 |
| NM_144827 | Spata20       | 6 |
| NM_144856 | Slc22a7       | 6 |
| NM_144931 | Nae1          | 6 |
| NM_145126 | Chi314        | 6 |
| NM_145128 | Mgat5         | 6 |
| NM_145223 | Alms1         | 6 |
| NM_145462 | Haus4         | 6 |
| NM_145508 | Dyrk3         | 6 |
| NM_145589 | Prr14         | 6 |
| NM_145615 | Etfa          | 6 |
| NM_145705 | Tinf2         | 6 |
| NM_145842 | Vmn1r69       | 6 |
| NM_146036 | Ahsa1         | 6 |
| NM_146069 | Lrrc33        | 6 |
| NM_146074 | Tfb1m         | 6 |
| NM_146089 | Haus1         | 6 |
| NM_146116 | Tubb2c        | 6 |
| NM_146171 | Ncapd2        | 6 |
| NM_146560 | Olfr872       | 6 |
| NM_146629 | Olfr121       | 6 |
| NM_146780 | Olfr715       | 6 |
| NM_148927 | Plekha4       | 6 |
| NM_153154 | Tcfap2d       | 6 |
| NM_153391 | Wdr19         | 6 |
| NM_153520 | Opalin        | 6 |
| NM_153544 | BC030867      | 6 |
| NM_153561 | Nudt6         | 6 |
| NM_172121 | Zc3h3         | 6 |
| NM_172297 | Ccdc9         | 6 |
| NM_172398 | Akr1b10       | 6 |
| NM_172438 | Thoc5         | 6 |
| NM_172491 | D130040H23Rik | 6 |
| NM_172551 | Polrmt        | 6 |
| NM_172630 | Mppel         | 6 |
| NM_172692 | Gba2          | 6 |
| NM_172794 | Zfp454        | 6 |
| NM_172805 | Kenh5         | 6 |
| NM_172854 | Olflm12a      | 6 |
| NM_172873 | Cdcp2         | 6 |
| NM_173031 | BC066135      | 6 |
| NM_173737 | 8430410A17Rik | 6 |
| NM_174989 | Ticam1        | 6 |
| NM_175148 | 2300002M23Rik | 6 |
| NM_175190 | 2900010J23Rik | 6 |
| NM_175265 | 6720463M24Rik | 6 |
| NM_175319 | C330005M16Rik | 6 |
| NM_175360 | Obfc1         | 6 |
| NM_175628 | A2m           | 6 |

|           |               |   |
|-----------|---------------|---|
| NM_175652 | Hist4h4       | 6 |
| NM_175655 | Hist1h4f      | 6 |
| NM_175657 | Hist1h4n      | 6 |
| NM_176835 | Dnajc22       | 6 |
| NM_176838 | Esrp2         | 6 |
| NM_176848 | Fbxo2         | 6 |
| NM_177059 | Fstl4         | 6 |
| NM_177074 | Slc38a11      | 6 |
| NM_177128 | Iqcb1         | 6 |
| NM_177290 | Itgb8         | 6 |
| NM_177347 | Ifna13        | 6 |
| NM_177362 | Zfp771        | 6 |
| NM_177370 | Rhbdd3        | 6 |
| NM_177375 | Rab26         | 6 |
| NM_177570 | Slfn11        | 6 |
| NM_177699 | Fhod1         | 6 |
| NM_177749 | Kir3dl1       | 6 |
| NM_177791 | Kctd19        | 6 |
| NM_178595 | Ptrh1         | 6 |
| NM_178869 | Tt111         | 6 |
| NM_178911 | Pld4          | 6 |
| NM_178925 | Nsun3         | 6 |
| NM_181852 | Pr12c5        | 6 |
| NM_183014 | Zfp184        | 6 |
| NM_183109 | Tmprss12      | 6 |
| NM_183124 | Defb41        | 6 |
| NM_197979 | Uqcr10        | 6 |
| NM_198095 | Bst2          | 6 |
| NM_198106 | Slc9a10       | 6 |
| NM_198192 | Qrfpr         | 6 |
| NM_198661 | Oog2          | 6 |
| NM_198674 | Fbxw26        | 6 |
| NM_198677 | BC061237      | 6 |
| NM_198885 | Scx           | 6 |
| NM_199027 | Zfp335        | 6 |
| NM_199200 | Fam171a2      | 6 |
| NM_199251 | Kcnk12        | 6 |
| NM_201637 | Chd8          | 6 |
| NM_206534 | Chuc1         | 6 |
| NM_206924 | Jtb           | 6 |
| NM_212487 | Krt78         | 6 |
| NR_002868 | Gm5476        | 6 |
| NR_002879 | Defb44-ps     | 6 |
| NR_003100 | 4930515G16Rik | 6 |
| NR_028101 | Gm12191       | 6 |
| NR_028299 | 1700084E18Rik | 6 |
| NR_028441 | Vmn2r-ps60    | 6 |
| NR_029544 | Mir130a       | 6 |
| NR_029588 | Mir201        | 6 |
| NR_029718 | Mir30d        | 6 |
| NR_029723 | Mir200a       | 6 |
| NR_029744 | Mir29a        | 6 |
| NR_030274 | Mir450-2      | 6 |
| NR_030539 | Mir881        | 6 |

|              |               |   |
|--------------|---------------|---|
| NR_030542    | Mir883b       | 6 |
| NR_033523    | Gm11517       | 6 |
| NR_035527    | Mir599        | 6 |
| NR_037304    | Mir3471-1     | 6 |
| NM_001001185 | BC048507      | 5 |
| NM_001001320 | Tbx10         | 5 |
| NM_001001333 | Hexdc         | 5 |
| NM_001002791 | Defb22        | 5 |
| NM_001002894 | Nlrp14        | 5 |
| NM_001004187 | 2610020H08Rik | 5 |
| NM_001005358 | Zfp960        | 5 |
| NM_001005426 | Zcwpw1        | 5 |
| NM_001005847 | Aga           | 5 |
| NM_001008705 | Bud31         | 5 |
| NM_001009548 | 4930529F22Rik | 5 |
| NM_001013385 | Grm4          | 5 |
| NM_001014395 | Fbxw22        | 5 |
| NM_001014900 | Zmynd12       | 5 |
| NM_001017409 | Tbata         | 5 |
| NM_001024206 | Trappc1       | 5 |
| NM_001024719 | Cyp2c67       | 5 |
| NM_001029985 | Kcp           | 5 |
| NM_001033131 | Krtdap        | 5 |
| NM_001033176 | 1700039E15Rik | 5 |
| NM_001033305 | Ndufb6        | 5 |
| NM_001033356 | Ntn5          | 5 |
| NM_001033372 | Gm648         | 5 |
| NM_001034856 | 4930430D24Rik | 5 |
| NM_001037916 | Ccdc17        | 5 |
| NM_001038231 | Banf1         | 5 |
| NM_001039049 | Cox8c         | 5 |
| NM_001040435 | Tacc3         | 5 |
| NM_001040631 | Clqtnf5       | 5 |
| NM_001042421 | Kntc1         | 5 |
| NM_001042542 | Akap4         | 5 |
| NM_001044384 | Timpl         | 5 |
| NM_001048005 | 1110017D15Rik | 5 |
| NM_001077421 | Sbpl          | 5 |
| NM_001077696 | Hdac5         | 5 |
| NM_001077705 | Ptpn6         | 5 |
| NM_001079865 | Ces2f         | 5 |
| NM_001080712 | Gm7534        | 5 |
| NM_001080815 | Gipr          | 5 |
| NM_001080940 | Gm6484        | 5 |
| NM_001080942 | 9230107M04Rik | 5 |
| NM_001080981 | Ddx23         | 5 |
| NM_001081084 | Cubn          | 5 |
| NM_001081095 | 1700009N14Rik | 5 |
| NM_001081104 | Chrna9        | 5 |
| NM_001081117 | Mki67         | 5 |
| NM_001081136 | Awat1         | 5 |
| NM_001081214 | Pprc1         | 5 |
| NM_001081257 | Hpse2         | 5 |
| NM_001081314 | C2cd4b        | 5 |

|              |               |   |
|--------------|---------------|---|
| NM_001081352 | Ttc37         | 5 |
| NM_001083188 | Lig1          | 5 |
| NM_001083884 | 2210415F13Rik | 5 |
| NM_001083921 | Rbck1         | 5 |
| NM_001085530 | Gm13298       | 5 |
| NM_001098269 | Gm10375       | 5 |
| NM_001099310 | Gm8787        | 5 |
| NM_001099331 | R3hdml        | 5 |
| NM_001099633 | Dnahc9        | 5 |
| NM_001099635 | Myh3          | 5 |
| NM_001100455 | Lcn11         | 5 |
| NM_001101534 | Sult2a4       | 5 |
| NM_001101600 | Gm7616        | 5 |
| NM_001101603 | Gm8439        | 5 |
| NM_001102446 | Alas2         | 5 |
| NM_001103168 | Zglp1         | 5 |
| NM_001110300 | Ap1m2         | 5 |
| NM_001111066 | Fkbp8         | 5 |
| NM_001112698 | Ngf           | 5 |
| NM_001112738 | Atp5c1        | 5 |
| NM_001113199 | Naca          | 5 |
| NM_001122668 | E330014E10Rik | 5 |
| NM_001123394 | Ang3          | 5 |
| NM_001126046 | Fam178b       | 5 |
| NM_001127340 | Acrbp         | 5 |
| NM_001130479 | Nucb2         | 5 |
| NM_001134674 | Mup13         | 5 |
| NM_001134675 | Mup7          | 5 |
| NM_001134733 | CK137956      | 5 |
| NM_001135127 | Mup19         | 5 |
| NM_001136117 | C2cd4d        | 5 |
| NM_001136227 | Rtkn          | 5 |
| NM_001139511 | Raly          | 5 |
| NM_001143689 | H2-Gs10       | 5 |
| NM_001145644 | Phgr1         | 5 |
| NM_001159421 | Ccdc58        | 5 |
| NM_001159502 | Ddx24         | 5 |
| NM_001159620 | Pigp          | 5 |
| NM_001161373 | F8            | 5 |
| NM_001161806 | Wfdc11        | 5 |
| NM_001162412 | Cysltr2       | 5 |
| NM_001162933 | Rpl101        | 5 |
| NM_001162937 | Bet31         | 5 |
| NM_001162955 | Gpr15         | 5 |
| NM_001163103 | Gm70          | 5 |
| NM_001163194 | Sfta2         | 5 |
| NM_001163378 | 2700049A03Rik | 5 |
| NM_001163432 | Clk2          | 5 |
| NM_001163511 | Spata5        | 5 |
| NM_001163521 | 1700034F02Rik | 5 |
| NM_001163588 | Prph          | 5 |
| NM_001163787 | Ccdc151       | 5 |
| NM_001164044 | Cc127a        | 5 |
| NM_001164207 | Tmem176b      | 5 |

|              |               |   |
|--------------|---------------|---|
| NM_001164320 | Chad1         | 5 |
| NM_001164437 | Tmem212       | 5 |
| NM_001164485 | Fam170b       | 5 |
| NM_001164600 | Puf60         | 5 |
| NM_001164682 | Mpp4          | 5 |
| NM_001164733 | Mpp6          | 5 |
| NM_001164833 | P2rx2         | 5 |
| NM_001165256 | Dcaf4         | 5 |
| NM_001166601 | Gm16430       | 5 |
| NM_001166646 | Gm16405       | 5 |
| NM_001166672 | Gm14548       | 5 |
| NM_001167891 | Nrg2          | 5 |
| NM_001171024 | Nup62-il4i1   | 5 |
| NM_001172152 | Wdr17         | 5 |
| NM_001172588 | Mrgpra2a      | 5 |
| NM_001177366 | Fut7          | 5 |
| NM_001177471 | Gm15056       | 5 |
| NM_001177544 | Hist1h2ao     | 5 |
| NM_001177551 | Trim61        | 5 |
| NM_001177581 | 7420461P10Rik | 5 |
| NM_001177691 | Gal3st1       | 5 |
| NM_001177806 | Eif2ak4       | 5 |
| NM_001190264 | Mrps36        | 5 |
| NM_001190357 | Carkd         | 5 |
| NM_001190717 | Dbf4          | 5 |
| NM_001193666 | Gm13304       | 5 |
| NM_001193667 | Gm1987        | 5 |
| NM_001193668 | Gm10591       | 5 |
| NM_001195091 | Gm6537        | 5 |
| NM_001195298 | Kifc1         | 5 |
| NM_001195748 | Rgs22         | 5 |
| NM_001199995 | Mup12         | 5 |
| NM_001200025 | 1700015F17Rik | 5 |
| NM_007385    | Apoc4         | 5 |
| NM_007448    | Ang5          | 5 |
| NM_007504    | Atp2a1        | 5 |
| NM_007607    | Car4          | 5 |
| NM_007685    | Cfc1          | 5 |
| NM_007693    | Chga          | 5 |
| NM_007738    | Col7a1        | 5 |
| NM_007811    | Cyp26a1       | 5 |
| NM_007957    | Esx1          | 5 |
| NM_007995    | Fcna          | 5 |
| NM_008012    | Akr1b8        | 5 |
| NM_008103    | Gcm1          | 5 |
| NM_008118    | Gif           | 5 |
| NM_008127    | Gjb4          | 5 |
| NM_008143    | Gnb211        | 5 |
| NM_008185    | Gstt1         | 5 |
| NM_008191    | Guca2b        | 5 |
| NM_008302    | Hsp90ab1      | 5 |
| NM_008340    | Igfals        | 5 |
| NM_008389    | Ipp           | 5 |
| NM_008439    | Khk           | 5 |

|           |         |   |
|-----------|---------|---|
| NM_008481 | Lama2   | 5 |
| NM_008513 | Lrp5    | 5 |
| NM_008528 | Blnk    | 5 |
| NM_008631 | Mt4     | 5 |
| NM_008685 | Nfe2    | 5 |
| NM_008747 | Ntsr2   | 5 |
| NM_008808 | Pdgfa   | 5 |
| NM_008841 | Pik3r2  | 5 |
| NM_008895 | Pomc    | 5 |
| NM_008915 | Ppp3cc  | 5 |
| NM_008933 | Prm2    | 5 |
| NM_008968 | Ptgis   | 5 |
| NM_009098 | Rps8    | 5 |
| NM_009101 | Rras    | 5 |
| NM_009205 | Slc3a1  | 5 |
| NM_009219 | Sstr4   | 5 |
| NM_009264 | Sprrla  | 5 |
| NM_009270 | Sqle    | 5 |
| NM_009294 | Stx4a   | 5 |
| NM_009377 | Th      | 5 |
| NM_009437 | Tst     | 5 |
| NM_009440 | Tsx     | 5 |
| NM_009571 | Zfy2    | 5 |
| NM_009599 | Ache    | 5 |
| NM_009606 | Acta1   | 5 |
| NM_009635 | Avil    | 5 |
| NM_009673 | Anxa5   | 5 |
| NM_009676 | Aox1    | 5 |
| NM_009711 | Artn    | 5 |
| NM_009720 | Atox1   | 5 |
| NM_009836 | Cct3    | 5 |
| NM_009854 | Cd7     | 5 |
| NM_010004 | Cyp2c40 | 5 |
| NM_010108 | Efna3   | 5 |
| NM_010215 | I14i1   | 5 |
| NM_010254 | Galr2   | 5 |
| NM_010346 | Grb7    | 5 |
| NM_010386 | H2-DMa  | 5 |
| NM_010410 | Hert    | 5 |
| NM_010584 | Itln1   | 5 |
| NM_010661 | Krt12   | 5 |
| NM_010666 | Krt27   | 5 |
| NM_010689 | Lat     | 5 |
| NM_010779 | Mcpt4   | 5 |
| NM_010810 | Mmp7    | 5 |
| NM_011107 | Pla2g1b | 5 |
| NM_011124 | Ccl21a  | 5 |
| NM_011130 | Polb    | 5 |
| NM_011133 | Pole2   | 5 |
| NM_011239 | Ranbp1  | 5 |
| NM_011240 | Ranbp2  | 5 |
| NM_011254 | Rbp1    | 5 |
| NM_011270 | Rhd     | 5 |
| NM_011289 | Rpl27   | 5 |

|           |           |   |
|-----------|-----------|---|
| NM_011309 | S100a1    | 5 |
| NM_011310 | S100a3    | 5 |
| NM_011311 | S100a4    | 5 |
| NM_011335 | Cc121b    | 5 |
| NM_011474 | Sprrr2h   | 5 |
| NM_011539 | Tbxas1    | 5 |
| NM_011587 | Tie1      | 5 |
| NM_011588 | Trim28    | 5 |
| NM_011608 | Tnfrsf17  | 5 |
| NM_011639 | Trip6     | 5 |
| NM_011654 | Tubal1b   | 5 |
| NM_011698 | Lin7b     | 5 |
| NM_011764 | Zfp90     | 5 |
| NM_011778 | Coro1b    | 5 |
| NM_011786 | Aloxe3    | 5 |
| NM_011817 | Gadd45g   | 5 |
| NM_011826 | Hax1      | 5 |
| NM_011840 | Map2k5    | 5 |
| NM_011887 | Scn11a    | 5 |
| NM_011905 | Tlr2      | 5 |
| NM_011912 | Vax2      | 5 |
| NM_011971 | Psmb3     | 5 |
| NM_011978 | Slc27a2   | 5 |
| NM_011996 | Adh4      | 5 |
| NM_012047 | Brd7      | 5 |
| NM_013482 | Btk       | 5 |
| NM_013497 | Creb3     | 5 |
| NM_013595 | Mbd3      | 5 |
| NM_013651 | Sf3a2     | 5 |
| NM_013700 | Usp5      | 5 |
| NM_013702 | Uncx      | 5 |
| NM_013712 | Itgbl1bp2 | 5 |
| NM_013739 | Dok3      | 5 |
| NM_013741 | Smok2a    | 5 |
| NM_013744 | Zfp354b   | 5 |
| NM_013833 | Rax       | 5 |
| NM_013872 | Pmm1      | 5 |
| NM_013879 | Cabp1     | 5 |
| NM_013891 | Spdef     | 5 |
| NM_013899 | Timm10    | 5 |
| NM_013919 | Usp21     | 5 |
| NM_015739 | Gbx1      | 5 |
| NM_015765 | Hspa14    | 5 |
| NM_015787 | Hist1h1e  | 5 |
| NM_015795 | Fbxo16    | 5 |
| NM_015821 | Fbx18     | 5 |
| NM_015827 | Copb2     | 5 |
| NM_016737 | Stip1     | 5 |
| NM_016754 | My1pf     | 5 |
| NM_016874 | Deaf1     | 5 |
| NM_016891 | Ppp2r1a   | 5 |
| NM_016913 | Porcn     | 5 |
| NM_016925 | Fanca     | 5 |
| NM_017399 | Fabp1     | 5 |



|           |               |   |
|-----------|---------------|---|
| NM_017407 | Spag5         | 5 |
| NM_018754 | Sfn           | 5 |
| NM_018820 | Sertad1       | 5 |
| NM_018831 | Dclrela       | 5 |
| NM_019515 | Nmu           | 5 |
| NM_019546 | Prodh2        | 5 |
| NM_019676 | Plcd1         | 5 |
| NM_019710 | Smc1a         | 5 |
| NM_019722 | Ar12          | 5 |
| NM_019730 | Nme3          | 5 |
| NM_019779 | Cyp11a1       | 5 |
| NM_019945 | Mast1         | 5 |
| NM_019968 | Ar110         | 5 |
| NM_019992 | Stap1         | 5 |
| NM_020490 | Ltb4r2        | 5 |
| NM_020519 | Slurp1        | 5 |
| NM_020580 | Th11          | 5 |
| NM_020616 | D930014E17Rik | 5 |
| NM_021329 | Rangrf        | 5 |
| NM_021443 | Cc18          | 5 |
| NM_021480 | Tdh           | 5 |
| NM_021526 | Psmc14        | 5 |
| NM_021551 | Slc22a17      | 5 |
| NM_021556 | Mrps30        | 5 |
| NM_022326 | Ctsm          | 5 |
| NM_022987 | Zic5          | 5 |
| NM_023044 | Slc15a3       | 5 |
| NM_023052 | Cc121c        | 5 |
| NM_023154 | Ethel         | 5 |
| NM_023162 | Znrd1         | 5 |
| NM_023223 | Cdc20         | 5 |
| NM_023229 | Fastk         | 5 |
| NM_023608 | Gdpd2         | 5 |
| NM_024177 | Mrpl38        | 5 |
| NM_024220 | Ndufc2        | 5 |
| NM_024257 | Hdhd3         | 5 |
| NM_024473 | BC005537      | 5 |
| NM_025290 | Rsph1         | 5 |
| NM_025325 | Haao          | 5 |
| NM_025338 | Aurkaip1      | 5 |
| NM_025339 | Tmem42        | 5 |
| NM_025366 | Chchd1        | 5 |
| NM_025386 | Fbxo36        | 5 |
| NM_025399 | Nudt14        | 5 |
| NM_025417 | Commd4        | 5 |
| NM_025418 | Vtal          | 5 |
| NM_025446 | Aigl          | 5 |
| NM_025468 | Sec11c        | 5 |
| NM_025485 | Mrps22        | 5 |
| NM_025498 | Psenen        | 5 |
| NM_025506 | Riiad1        | 5 |
| NM_025538 | Alkbh7        | 5 |
| NM_025543 | Mcts2         | 5 |
| NM_025547 | Mterfd1       | 5 |

|           |               |   |
|-----------|---------------|---|
| NM_025554 | Polr2e        | 5 |
| NM_025556 | 2410022L05Rik | 5 |
| NM_025648 | Farsa         | 5 |
| NM_025660 | Ribc1         | 5 |
| NM_025718 | Dnase112      | 5 |
| NM_025808 | Lztr1         | 5 |
| NM_025842 | Vps28         | 5 |
| NM_025859 | Ar11          | 5 |
| NM_025909 | Oma1          | 5 |
| NM_025920 | Thap4         | 5 |
| NM_025956 | 1700011H14Rik | 5 |
| NM_026108 | Hdhd1a        | 5 |
| NM_026119 | Med4          | 5 |
| NM_026158 | Isoc2b        | 5 |
| NM_026229 | Gpr89         | 5 |
| NM_026304 | 17Rn6         | 5 |
| NM_026305 | Tceb2         | 5 |
| NM_026411 | 1700021F05Rik | 5 |
| NM_026464 | Wdr55         | 5 |
| NM_026578 | Gar1          | 5 |
| NM_026616 | Rnaseh2c      | 5 |
| NM_026619 | Gsto2         | 5 |
| NM_026631 | Nhp2          | 5 |
| NM_026648 | Lrrc50        | 5 |
| NM_026668 | Lrriq4        | 5 |
| NM_026708 | Tlcd1         | 5 |
| NM_026712 | Zfp414        | 5 |
| NM_026789 | Wdr65         | 5 |
| NM_026791 | Fbxw9         | 5 |
| NM_026794 | Deb1          | 5 |
| NM_026796 | Smyd2         | 5 |
| NM_026814 | Dysfipl       | 5 |
| NM_026824 | Dus11         | 5 |
| NM_026826 | Mrps18c       | 5 |
| NM_026911 | Spes1         | 5 |
| NM_026945 | Adh6a         | 5 |
| NM_027062 | C8g           | 5 |
| NM_027067 | 1700014N06Rik | 5 |
| NM_027072 | Plac811       | 5 |
| NM_027116 | Nkpd1         | 5 |
| NM_027123 | Fastkd3       | 5 |
| NM_027132 | Otop3         | 5 |
| NM_027150 | 2310046A06Rik | 5 |
| NM_027185 | Def6          | 5 |
| NM_027207 | 1600002K03Rik | 5 |
| NM_027210 | Ceacam13      | 5 |
| NM_027289 | Nt5dc2        | 5 |
| NM_027292 | Tspo2         | 5 |
| NM_027320 | Ifi35         | 5 |
| NM_027381 | 2510012J08Rik | 5 |
| NM_027510 | 3830403N18Rik | 5 |
| NM_027572 | Slc22a16      | 5 |
| NM_027602 | Nsun7         | 5 |
| NM_027635 | 4931423N10Rik | 5 |

|           |               |   |
|-----------|---------------|---|
| NM_027745 | Ccdc57        | 5 |
| NM_027749 | Cpv1          | 5 |
| NM_027760 | Rassf8        | 5 |
| NM_027793 | Amtn          | 5 |
| NM_027852 | Rarres2       | 5 |
| NM_027853 | Mettl7b       | 5 |
| NM_027877 | Mus81         | 5 |
| NM_027892 | Ppplr12a      | 5 |
| NM_027919 | Tha1          | 5 |
| NM_027940 | 1700001F09Rik | 5 |
| NM_027952 | 1700008I05Rik | 5 |
| NM_027974 | Efhc1         | 5 |
| NM_027980 | 2310003H01Rik | 5 |
| NM_027985 | Mad212        | 5 |
| NM_027999 | Haus5         | 5 |
| NM_028020 | Cpsf31        | 5 |
| NM_028066 | F11           | 5 |
| NM_028145 | Klh135        | 5 |
| NM_028177 | Ndufab1       | 5 |
| NM_028216 | Psca          | 5 |
| NM_028260 | Immp11        | 5 |
| NM_028283 | Uaca          | 5 |
| NM_028341 | Ttc39c        | 5 |
| NM_028381 | Ccdc94        | 5 |
| NM_028439 | 3110009E18Rik | 5 |
| NM_028518 | Col20a1       | 5 |
| NM_028524 | Cmtm2b        | 5 |
| NM_028557 | Mbd311        | 5 |
| NM_028560 | Pebp4         | 5 |
| NM_028608 | Glipr1        | 5 |
| NM_028617 | Fam125a       | 5 |
| NM_028865 | 1110005A03Rik | 5 |
| NM_028925 | Polr3c        | 5 |
| NM_028927 | Tkt12         | 5 |
| NM_029042 | 4930435E12Rik | 5 |
| NM_029115 | 4930455F23Rik | 5 |
| NM_029122 | Iqca          | 5 |
| NM_029181 | Slx11         | 5 |
| NM_029317 | Izumo2        | 5 |
| NM_029355 | Pr17b1        | 5 |
| NM_029401 | Vwa5b1        | 5 |
| NM_029444 | 4930447C04Rik | 5 |
| NM_029463 | 4930568D16Rik | 5 |
| NM_029532 | Snrnp35       | 5 |
| NM_029556 | Clybl         | 5 |
| NM_029636 | Ctsq          | 5 |
| NM_029671 | 1700034015Rik | 5 |
| NM_029723 | Dapl1         | 5 |
| NM_029738 | Cluap1        | 5 |
| NM_029797 | Mnd1          | 5 |
| NM_029825 | Scfd1         | 5 |
| NM_029960 | 9230104L09Rik | 5 |
| NM_029971 | Pmch          | 5 |
| NM_030141 | 1700061G19Rik | 5 |

|           |               |   |
|-----------|---------------|---|
| NM_030218 | 9130017N09Rik | 5 |
| NM_030219 | Trim42        | 5 |
| NM_030715 | Polh          | 5 |
| NM_030737 | Vmn1r171      | 5 |
| NM_031170 | Krt8          | 5 |
| NM_031188 | Mup1          | 5 |
| NM_031397 | Bicc1         | 5 |
| NM_031884 | Abcg5         | 5 |
| NM_032004 | Tssk6         | 5 |
| NM_032394 | Myo7b         | 5 |
| NM_032465 | Cd96          | 5 |
| NM_032540 | Kel           | 5 |
| NM_032543 | Rnf123        | 5 |
| NM_033145 | Lcn8          | 5 |
| NM_033373 | Krt23         | 5 |
| NM_033398 | Jmjd6         | 5 |
| NM_033522 | Ferd31        | 5 |
| NM_033573 | Prcc          | 5 |
| NM_033617 | Atp6v0b       | 5 |
| NM_053159 | Mrp13         | 5 |
| NM_053193 | Cpsf1         | 5 |
| NM_053253 | Zmynd10       | 5 |
| NM_054037 | Scgb3a1       | 5 |
| NM_054053 | Gpr98         | 5 |
| NM_080289 | Grhpr         | 5 |
| NM_080457 | Muc4          | 5 |
| NM_080858 | Asb12         | 5 |
| NM_130453 | Gpha2         | 5 |
| NM_130870 | Krtap16-1     | 5 |
| NM_130882 | Cyp4f13       | 5 |
| NM_133202 | Trhr2         | 5 |
| NM_133205 | Arr3          | 5 |
| NM_133223 | Rac3          | 5 |
| NM_133686 | Qprt          | 5 |
| NM_133892 | Lao1          | 5 |
| NM_133897 | Lrrc8c        | 5 |
| NM_133972 | Armc6         | 5 |
| NM_134006 | Rdh5          | 5 |
| NM_134100 | Mfsd5         | 5 |
| NM_134116 | Gpsm3         | 5 |
| NM_134138 | Psmg2         | 5 |
| NM_134157 | Atp6v1b1      | 5 |
| NM_134158 | AF251705      | 5 |
| NM_138591 | Gfm1          | 5 |
| NM_138683 | Rspo1         | 5 |
| NM_138684 | Wfdc12        | 5 |
| NM_138743 | Fam165b       | 5 |
| NM_138745 | Mthfd1        | 5 |
| NM_139198 | Plac8         | 5 |
| NM_139225 | Defb10        | 5 |
| NM_144509 | Arl6ip4       | 5 |
| NM_144785 | Slc22a19      | 5 |
| NM_144912 | Rad9b         | 5 |
| NM_144930 | Ces1f         | 5 |

|           |              |   |
|-----------|--------------|---|
| NM_144932 | Acsf3        | 5 |
| NM_144955 | Nkx6-1       | 5 |
| NM_145124 | Mib2         | 5 |
| NM_145146 | Afm          | 5 |
| NM_145490 | Zfp959       | 5 |
| NM_145595 | Cbr4         | 5 |
| NM_145610 | Ppan         | 5 |
| NM_145745 | Adam34       | 5 |
| NM_145829 | Nags         | 5 |
| NM_145934 | Stap2        | 5 |
| NM_146007 | Col6a2       | 5 |
| NM_146030 | Plekhh3      | 5 |
| NM_146189 | Mybpc2       | 5 |
| NM_146226 | Apeh         | 5 |
| NM_146597 | Olfir702     | 5 |
| NM_146715 | Olfir419     | 5 |
| NM_146881 | Olfir1404    | 5 |
| NM_146918 | Olfir1180    | 5 |
| NM_147013 | Olfir1038-ps | 5 |
| NM_152822 | Las1l        | 5 |
| NM_152923 | Kcnq3        | 5 |
| NM_153064 | Ndufs2       | 5 |
| NM_153081 | Slc16a1l     | 5 |
| NM_153101 | Mrgpra2b     | 5 |
| NM_153173 | Hist1h4h     | 5 |
| NM_153388 | Lrfn4        | 5 |
| NM_153533 | Tenc1        | 5 |
| NM_153557 | BC029214     | 5 |
| NM_153580 | Ino80e       | 5 |
| NM_153800 | Arhgap22     | 5 |
| NM_172385 | Zfp536       | 5 |
| NM_172812 | Htr2a        | 5 |
| NM_172822 | Pigz         | 5 |
| NM_172835 | Peli3        | 5 |
| NM_172855 | Galnt5       | 5 |
| NM_172864 | Wdr63        | 5 |
| NM_172895 | Fam71e2      | 5 |
| NM_173069 | Speer2       | 5 |
| NM_173426 | Fam110b      | 5 |
| NM_173861 | Csnka2ip     | 5 |
| NM_174850 | Mical12      | 5 |
| NM_174866 | Klk14        | 5 |
| NM_175102 | Sf3b5        | 5 |
| NM_175160 | Zdhhc1       | 5 |
| NM_175277 | Bola3        | 5 |
| NM_175370 | Als2cr12     | 5 |
| NM_175419 | Actr5        | 5 |
| NM_176917 | Mettl4       | 5 |
| NM_177041 | Flad1        | 5 |
| NM_177087 | Fam179a      | 5 |
| NM_177157 | Gchfr        | 5 |
| NM_177182 | Bhlha9       | 5 |
| NM_177318 | Zfp653       | 5 |
| NM_177470 | Acaa2        | 5 |

|           |               |   |
|-----------|---------------|---|
| NM_177565 | Zfp3          | 5 |
| NM_177567 | BC049762      | 5 |
| NM_177702 | 4833427G06Rik | 5 |
| NM_177707 | Stac3         | 5 |
| NM_177793 | 9030224M15Rik | 5 |
| NM_177819 | Fam135b       | 5 |
| NM_177919 | Tceal5        | 5 |
| NM_178185 | Hist1h2ap     | 5 |
| NM_178196 | Hist1h2bg     | 5 |
| NM_178197 | Hist1h2bh     | 5 |
| NM_178200 | Hist1h2bm     | 5 |
| NM_178201 | Hist1h2bn     | 5 |
| NM_178207 | Hist1h3i      | 5 |
| NM_178211 | Hist1h4k      | 5 |
| NM_178650 | Tbc1d10c      | 5 |
| NM_181323 | Cwh43         | 5 |
| NM_181588 | Cmb1          | 5 |
| NM_181849 | Fgb           | 5 |
| NM_181859 | Oxct2b        | 5 |
| NM_181989 | Sdr16c5       | 5 |
| NM_182805 | Gpt           | 5 |
| NM_182806 | Gpr18         | 5 |
| NM_183089 | Dscc1         | 5 |
| NM_183103 | Prss46        | 5 |
| NM_183170 | Mpv17l2       | 5 |
| NM_183190 | Ms4a5         | 5 |
| NM_183256 | 2310016M24Rik | 5 |
| NM_183264 | 5830405N20Rik | 5 |
| NM_194335 | Naif1         | 5 |
| NM_194344 | Sh3tc1        | 5 |
| NM_194357 | Rya3          | 5 |
| NM_194444 | Cdk10         | 5 |
| NM_198001 | 1110008P14Rik | 5 |
| NM_198299 | E130303B06Rik | 5 |
| NM_198627 | Vstm21        | 5 |
| NM_198673 | Odf311        | 5 |
| NM_199067 | Defb50        | 5 |
| NM_201372 | Ccdc84        | 5 |
| NM_207210 | Dyrk4         | 5 |
| NM_207618 | V1rd18        | 5 |
| NM_207670 | Gripap1       | 5 |
| NR_002142 | Rpph1         | 5 |
| NR_002900 | Snora69       | 5 |
| NR_015492 | C230035I16Rik | 5 |
| NR_024067 | Snhg6         | 5 |
| NR_027478 | Gm8580        | 5 |
| NR_027900 | Snhg9         | 5 |
| NR_028282 | Snord83b      | 5 |
| NR_028478 | Snora75       | 5 |
| NR_029825 | Mir7-1        | 5 |
| NR_030464 | Mir691        | 5 |
| NR_030486 | Mir705        | 5 |
| NR_030497 | Mir717        | 5 |
| NR_030529 | Mir804        | 5 |

|              |               |   |
|--------------|---------------|---|
| NR_030762    | Snord17       | 5 |
| NR_035463    | Mir1942       | 5 |
| NR_037235    | Mir3074-1     | 5 |
| NR_037294    | Mir3074-2     | 5 |
| NR_038088    | Bcl           | 5 |
| NM_001001334 | BC061194      | 4 |
| NM_001001804 | Ephx4         | 4 |
| NM_001002008 | Zfp948        | 4 |
| NM_001002787 | Ccin          | 4 |
| NM_001002900 | Higd1c        | 4 |
| NM_001005485 | Olfr111       | 4 |
| NM_001008425 | Thoc6         | 4 |
| NM_001011528 | Olfr456       | 4 |
| NM_001011531 | Olfr329-ps    | 4 |
| NM_001011741 | Olfr1386      | 4 |
| NM_001011743 | Olfr324       | 4 |
| NM_001011753 | Olfr115       | 4 |
| NM_001011802 | Olfr1318      | 4 |
| NM_001012322 | Sctr          | 4 |
| NM_001013023 | Mterf         | 4 |
| NM_001013759 | Gas212        | 4 |
| NM_001014976 | Esp11         | 4 |
| NM_001018019 | Grxcr1        | 4 |
| NM_001025375 | Wdr61         | 4 |
| NM_001029979 | Safb2         | 4 |
| NM_001031851 | Agxt2         | 4 |
| NM_001032298 | Bglap2        | 4 |
| NM_001033148 | 1700029J07Rik | 4 |
| NM_001033162 | 1700012A16Rik | 4 |
| NM_001033199 | AI747448      | 4 |
| NM_001033204 | Rpusd3        | 4 |
| NM_001033215 | Zfp957        | 4 |
| NM_001033220 | AU021092      | 4 |
| NM_001033374 | Gm694         | 4 |
| NM_001033404 | Gm813         | 4 |
| NM_001033458 | Gm1673        | 4 |
| NM_001033773 | Ube2u         | 4 |
| NM_001033807 | 4930567H17Rik | 4 |
| NM_001033980 | Fam92b        | 4 |
| NM_001034871 | Gm749         | 4 |
| NM_001034875 | Gm1006        | 4 |
| NM_001034910 | Defb42        | 4 |
| NM_001035123 | Setd6         | 4 |
| NM_001037722 | Adam15        | 4 |
| NM_001037742 | 1110034B05Rik | 4 |
| NM_001037749 | Slc22a14      | 4 |
| NM_001037762 | Zdhhc12       | 4 |
| NM_001037999 | Dbi           | 4 |
| NM_001039209 | Gm13152       | 4 |
| NM_001039556 | Rad54b        | 4 |
| NM_001042580 | Cd63          | 4 |
| NM_001042605 | Cd74          | 4 |
| NM_001045484 | Mef2b         | 4 |
| NM_001045543 | Gm11435       | 4 |

|              |               |   |
|--------------|---------------|---|
| NM_001045863 | Rdbp          | 4 |
| NM_001048219 | Nlrp9a        | 4 |
| NM_001081030 | Sbf1          | 4 |
| NM_001081032 | Gm8909        | 4 |
| NM_001081089 | Gpat2         | 4 |
| NM_001081130 | Ogdh1         | 4 |
| NM_001081142 | Kcnq4         | 4 |
| NM_001081179 | Heatr5b       | 4 |
| NM_001081190 | Gabrr3        | 4 |
| NM_001081202 | L1td1         | 4 |
| NM_001081226 | 2310009B15Rik | 4 |
| NM_001081312 | Tmco2         | 4 |
| NM_001081393 | Armc4         | 4 |
| NM_001081435 | Fbxo47        | 4 |
| NM_001081476 | Gm14725       | 4 |
| NM_001081668 | Nup62c1       | 4 |
| NM_001081670 | Gm5936        | 4 |
| NM_001081983 | Tmsb15b1      | 4 |
| NM_001082974 | Neur12        | 4 |
| NM_001083903 | Sbsn          | 4 |
| NM_001083955 | Hba-a2        | 4 |
| NM_001085500 | Cisd3         | 4 |
| NM_001085526 | Krtap1-3      | 4 |
| NM_001093749 | Mpz13         | 4 |
| NM_001099301 | Lcn14         | 4 |
| NM_001099313 | Gm11554       | 4 |
| NM_001099329 | Gm12769       | 4 |
| NM_001099742 | Scgblc1       | 4 |
| NM_001099917 | 2210404007Rik | 4 |
| NM_001101461 | 9130204L05Rik | 4 |
| NM_001101561 | Gm6251        | 4 |
| NM_001110133 | 1700093K21Rik | 4 |
| NM_001110201 | Yif1b         | 4 |
| NM_001110779 | Gm7714        | 4 |
| NM_001110807 | Capn12        | 4 |
| NM_001111025 | Pigx          | 4 |
| NM_001111073 | Fxyd5         | 4 |
| NM_001111296 | Sult2a1       | 4 |
| NM_001112715 | Ifitm1        | 4 |
| NM_001113387 | My11          | 4 |
| NM_001113527 | Isg20         | 4 |
| NM_001114322 | Cdhr5         | 4 |
| NM_001128601 | Gm2382        | 4 |
| NM_001130188 | Sgce          | 4 |
| NM_001130484 | Rpl35a        | 4 |
| NM_001134676 | Mup8          | 4 |
| NM_001136066 | Hmox2         | 4 |
| NM_001142706 | Cfb           | 4 |
| NM_001142750 | Tgif21x2      | 4 |
| NM_001142953 | LOC100233207  | 4 |
| NM_001146023 | Fam98c        | 4 |
| NM_001146307 | Clcnka        | 4 |
| NM_001146351 | Ephb6         | 4 |
| NM_001159523 | Shd           | 4 |



|              |               |   |
|--------------|---------------|---|
| NM_001159626 | Hagh          | 4 |
| NM_001159671 | Rsph6a        | 4 |
| NM_001159731 | Rxrg          | 4 |
| NM_001160149 | Cgref1        | 4 |
| NM_001160363 | 5430405G05Rik | 4 |
| NM_001161626 | Tmem116       | 4 |
| NM_001161714 | Tgm1          | 4 |
| NM_001162855 | Nsmce4a       | 4 |
| NM_001162901 | Tmem217       | 4 |
| NM_001162924 | Pkp3          | 4 |
| NM_001162998 | 1110017F19Rik | 4 |
| NM_001163102 | Eme2          | 4 |
| NM_001163243 | Fis1          | 4 |
| NM_001163271 | Fscb          | 4 |
| NM_001163385 | 4930579F01Rik | 4 |
| NM_001163465 | Rhpn1         | 4 |
| NM_001163550 | 1700016H13Rik | 4 |
| NM_001163752 | 4930432K21Rik | 4 |
| NM_001164235 | 1700007B14Rik | 4 |
| NM_001164258 | Xrral         | 4 |
| NM_001164433 | Mical1        | 4 |
| NM_001164567 | Vill          | 4 |
| NM_001166062 | Gm16381       | 4 |
| NM_001166361 | Fgf8          | 4 |
| NM_001166494 | Zpbp2         | 4 |
| NM_001167593 | Gm4934        | 4 |
| NM_001170591 | Nfu1          | 4 |
| NM_001172100 | Rnh1          | 4 |
| NM_001172104 | Zbtb25        | 4 |
| NM_001173500 | G630090E17Rik | 4 |
| NM_001177360 | Gpr137        | 4 |
| NM_001177482 | Gm14851       | 4 |
| NM_001177518 | Gm7849        | 4 |
| NM_001177607 | 0610010K14Rik | 4 |
| NM_001185040 | Gm5885        | 4 |
| NM_001195075 | Klh13         | 4 |
| NM_001195189 | 4930469G21Rik | 4 |
| NM_001195437 | Gm590         | 4 |
| NM_001198789 | Gm5918        | 4 |
| NM_001199044 | Prrc2a        | 4 |
| NM_001199632 | Fbxl13        | 4 |
| NM_001199843 | 1700019E19Rik | 4 |
| NM_001200006 | Mup17         | 4 |
| NM_001205239 | Parp6         | 4 |
| NM_001206367 | Gsn           | 4 |
| NM_007401    | Adam5         | 4 |
| NM_007450    | Slc25a4       | 4 |
| NM_007451    | Slc25a5       | 4 |
| NM_007455    | Ap1g2         | 4 |
| NM_007491    | Art5          | 4 |
| NM_007539    | Bdkrb1        | 4 |
| NM_007541    | Bglap         | 4 |
| NM_007572    | Clqa          | 4 |
| NM_007585    | Anxa2         | 4 |

|           |          |   |
|-----------|----------|---|
| NM_007605 | Capza3   | 4 |
| NM_007645 | Cd37     | 4 |
| NM_007661 | Cdk11b   | 4 |
| NM_007694 | Chgb     | 4 |
| NM_007747 | Cox5a    | 4 |
| NM_007749 | Cox7c    | 4 |
| NM_007763 | Crip1    | 4 |
| NM_007793 | Cstb     | 4 |
| NM_007806 | Cyba     | 4 |
| NM_007844 | Defa-rs1 | 4 |
| NM_007931 | Endog    | 4 |
| NM_008007 | Fgf3     | 4 |
| NM_008106 | Opn1mw   | 4 |
| NM_008206 | H2-0a    | 4 |
| NM_008218 | Hba-a1   | 4 |
| NM_008220 | Hbb-b1   | 4 |
| NM_008230 | Hdc      | 4 |
| NM_008233 | Hdgfrp2  | 4 |
| NM_008248 | Hint1    | 4 |
| NM_008290 | Hsd17b2  | 4 |
| NM_008361 | I11b     | 4 |
| NM_008412 | Ivl      | 4 |
| NM_008484 | Lamb3    | 4 |
| NM_008519 | Ltb4r1   | 4 |
| NM_008563 | Mcm3     | 4 |
| NM_008572 | Mcpt8    | 4 |
| NM_008574 | Smcp     | 4 |
| NM_008588 | Mesp1    | 4 |
| NM_008630 | Mt2      | 4 |
| NM_008637 | Nudt1    | 4 |
| NM_008674 | Nat3     | 4 |
| NM_008677 | Ncf4     | 4 |
| NM_008738 | Nrtn     | 4 |
| NM_008743 | Nthl1    | 4 |
| NM_008788 | Pcolce   | 4 |
| NM_008830 | Abcb4    | 4 |
| NM_008843 | Pip      | 4 |
| NM_008865 | Pr13b1   | 4 |
| NM_008948 | Psmc3    | 4 |
| NM_008963 | Ptgds    | 4 |
| NM_009017 | Raet1b   | 4 |
| NM_009042 | Reg1     | 4 |
| NM_009043 | Reg2     | 4 |
| NM_009074 | Mst1r    | 4 |
| NM_009206 | Slc4a1ap | 4 |
| NM_009449 | Tuba3b   | 4 |
| NM_009476 | Upk2     | 4 |
| NM_009564 | Zfp64    | 4 |
| NM_009581 | Zp3r     | 4 |
| NM_009591 | Aanat    | 4 |
| NM_009608 | Actc1    | 4 |
| NM_009632 | Parp2    | 4 |
| NM_009660 | Alox15   | 4 |
| NM_009731 | Akr1b7   | 4 |

|           |         |   |
|-----------|---------|---|
| NM_009751 | Bfsp1   | 4 |
| NM_009777 | Clqb    | 4 |
| NM_009839 | Cct6b   | 4 |
| NM_009885 | Cel     | 4 |
| NM_009902 | Clbn3   | 4 |
| NM_009940 | Coq7    | 4 |
| NM_009964 | Cryab   | 4 |
| NM_009978 | Cst8    | 4 |
| NM_009997 | Cyp2a4  | 4 |
| NM_010030 | Defb2   | 4 |
| NM_010114 | Klk1b22 | 4 |
| NM_010117 | Rhbdf1  | 4 |
| NM_010194 | Fes     | 4 |
| NM_010253 | Gal     | 4 |
| NM_010281 | Ggh     | 4 |
| NM_010321 | Gnmt    | 4 |
| NM_010492 | Ical    | 4 |
| NM_010494 | Icam2   | 4 |
| NM_010582 | Itih2   | 4 |
| NM_010594 | Kap     | 4 |
| NM_010635 | Klf1    | 4 |
| NM_010640 | Klk1b11 | 4 |
| NM_010642 | Klk1b21 | 4 |
| NM_010643 | Klk1b24 | 4 |
| NM_010702 | Lect2   | 4 |
| NM_010776 | Mbl2    | 4 |
| NM_010787 | Meal    | 4 |
| NM_010798 | Mif     | 4 |
| NM_010809 | Mmp3    | 4 |
| NM_010824 | Mpo     | 4 |
| NM_010830 | Msh6    | 4 |
| NM_010929 | Notch4  | 4 |
| NM_010946 | Ntan1   | 4 |
| NM_011025 | Oxt     | 4 |
| NM_011036 | Reg3b   | 4 |
| NM_011073 | Prf1    | 4 |
| NM_011091 | Pira4   | 4 |
| NM_011094 | Pira7   | 4 |
| NM_011129 |         | 4 |
| NM_011131 | Pold1   | 4 |
| NM_011159 | Prkdc   | 4 |
| NM_011186 | Psmb5   | 4 |
| NM_011189 | Psmel   | 4 |
| NM_011251 | Rbm6    | 4 |
| NM_011292 | Rpl9    | 4 |
| NM_011314 | Saa2    | 4 |
| NM_011369 | Shcbp1  | 4 |
| NM_011408 | Slfn2   | 4 |
| NM_011414 | Slpi    | 4 |
| NM_011481 | Srms    | 4 |
| NM_011487 | Stat4   | 4 |
| NM_011509 | Gm3258  | 4 |
| NM_011517 | Sycp3   | 4 |
| NM_011602 | Tln1    | 4 |

4-Sep

|           |               |   |
|-----------|---------------|---|
| NM_011653 | Tubala        | 4 |
| NM_011706 | Trpv2         | 4 |
| NM_011707 | Vtn           | 4 |
| NM_011888 | Cc119         | 4 |
| NM_011950 | Mapk13        | 4 |
| NM_011967 | Psm5          | 4 |
| NM_012019 | Aifm1         | 4 |
| NM_012050 | Omd           | 4 |
| NM_013460 | Adrald        | 4 |
| NM_013479 | Bcl2l10       | 4 |
| NM_013484 | C2            | 4 |
| NM_013522 | Frg1          | 4 |
| NM_013547 | Hgd           | 4 |
| NM_013549 | Hist2h2aa1    | 4 |
| NM_013550 | Hist1h3a      | 4 |
| NM_013558 | Hsp11         | 4 |
| NM_013560 | Hspb1         | 4 |
| NM_013606 | Mx2           | 4 |
| NM_013621 | Olfir69       | 4 |
| NM_013665 | Shox2         | 4 |
| NM_013694 | Tnp2          | 4 |
| NM_013752 | Nbn           | 4 |
| NM_013792 | Naglu         | 4 |
| NM_013795 | Atp5l         | 4 |
| NM_013811 | Dnahc8        | 4 |
| NM_015740 | Bloc1s1       | 4 |
| NM_015748 | Slit1         | 4 |
| NM_015770 | a             | 4 |
| NM_015777 | Igbp1b        | 4 |
| NM_015786 | Hist1h1c      | 4 |
| NM_016712 | Tmod4         | 4 |
| NM_016765 | Ddah2         | 4 |
| NM_016776 | Mybbp1a       | 4 |
| NM_016784 | Plrg1         | 4 |
| NM_016849 | Irf3          | 4 |
| NM_016892 | Ccs           | 4 |
| NM_016956 | Hbb-b2        | 4 |
| NM_016982 | Vpreb1        | 4 |
| NM_017370 | Hp            | 4 |
| NM_017383 | Cntn6         | 4 |
| NM_018802 | Syt8          | 4 |
| NM_018868 | Nop58         | 4 |
| NM_019417 | Pdlim4        | 4 |
| NM_019420 | B3galt4       | 4 |
| NM_019444 | Ramp2         | 4 |
| NM_019447 | Hgfac         | 4 |
| NM_019450 | I11f6         | 4 |
| NM_019678 | Tfg           | 4 |
| NM_019721 | Mettl3        | 4 |
| NM_019775 | Cpb2          | 4 |
| NM_019877 | Copz2         | 4 |
| NM_019938 | Pmfbp1        | 4 |
| NM_019943 | Pap01b        | 4 |
| NM_020003 | 0610031J06Rik | 4 |

|           |               |   |
|-----------|---------------|---|
| NM_020034 | Hist1h1b      | 4 |
| NM_020330 | Adam21        | 4 |
| NM_020504 | Cldn13        | 4 |
| NM_020513 | O1fr1508      | 4 |
| NM_020517 | Lenep         | 4 |
| NM_021290 | Ucn           | 4 |
| NM_021304 | Abhd1         | 4 |
| NM_021318 | Fh15          | 4 |
| NM_021320 | Ntn4          | 4 |
| NM_021336 | Snrpa1        | 4 |
| NM_021397 | Zbtb32        | 4 |
| NM_021445 | Cts6          | 4 |
| NM_021478 | Tulp1         | 4 |
| NM_021502 | Trappc21      | 4 |
| NM_021540 | Rnf130        | 4 |
| NM_021789 | Trappc4       | 4 |
| NM_021791 | Doc2g         | 4 |
| NM_021888 | Qtrt1         | 4 |
| NM_022033 | Oxct2a        | 4 |
| NM_023049 | Asb2          | 4 |
| NM_023054 | Utp3          | 4 |
| NM_023160 | Cml1          | 4 |
| NM_023186 | Chia          | 4 |
| NM_023211 | Usmg5         | 4 |
| NM_023219 | Slc5a4b       | 4 |
| NM_023456 | Npy           | 4 |
| NM_023557 | Slc44a4       | 4 |
| NM_023623 | Cyp2d40       | 4 |
| NM_023894 | Rhox9         | 4 |
| NM_023898 | Pde6h         | 4 |
| NM_024166 | Chchd2        | 4 |
| NM_024264 | Cyp27a1       | 4 |
| NM_024266 | Rps25         | 4 |
| NM_024267 | Ipo4          | 4 |
| NM_024283 | 1500015010Rik | 4 |
| NM_024414 | Stx1b         | 4 |
| NM_024445 | Tsnaxip1      | 4 |
| NM_025276 | Evpl          | 4 |
| NM_025358 | Ndufa9        | 4 |
| NM_025470 | 1810030J14Rik | 4 |
| NM_025510 | 2310004I24Rik | 4 |
| NM_025532 | Pr12b1        | 4 |
| NM_025536 | Commd5        | 4 |
| NM_025550 | Psmc6         | 4 |
| NM_025569 | Mgst3         | 4 |
| NM_025740 | Ccdc104       | 4 |
| NM_025794 | Etfdh         | 4 |
| NM_025798 | Hint3         | 4 |
| NM_025928 | Pmf1          | 4 |
| NM_026040 | Srfbp1        | 4 |
| NM_026041 | Rrp15         | 4 |
| NM_026065 | Mrpl42        | 4 |
| NM_026068 | Med31         | 4 |
| NM_026099 | 1700065I17Rik | 4 |

|           |               |   |
|-----------|---------------|---|
| NM_026136 | 4930449I24Rik | 4 |
| NM_026208 | 1700019N19Rik | 4 |
| NM_026317 | Prss37        | 4 |
| NM_026330 | Nsmccl        | 4 |
| NM_026334 | Lipf          | 4 |
| NM_026351 | Ttc39d        | 4 |
| NM_026362 | 5033414D02Rik | 4 |
| NM_026393 | Nmral1        | 4 |
| NM_026458 | Abca14        | 4 |
| NM_026492 | Ssxbl         | 4 |
| NM_026543 | 3010026009Rik | 4 |
| NM_026550 | Pak1ipl       | 4 |
| NM_026566 | 9430023L20Rik | 4 |
| NM_026660 | Mfsd10        | 4 |
| NM_026678 | Blvra         | 4 |
| NM_026748 | Ints1         | 4 |
| NM_026779 | Mocos         | 4 |
| NM_026827 | Tmem219       | 4 |
| NM_026829 | Mthfs         | 4 |
| NM_026840 | Pdgfr1        | 4 |
| NM_026888 | Phkg2         | 4 |
| NM_026915 | Lyz14         | 4 |
| NM_026960 | Gsdmd         | 4 |
| NM_027014 | Gins1         | 4 |
| NM_027018 | Glipr111      | 4 |
| NM_027111 | Lygl          | 4 |
| NM_027168 | Hddc2         | 4 |
| NM_027249 | Tlcd2         | 4 |
| NM_027268 | Scrn1         | 4 |
| NM_027278 | 2810432D09Rik | 4 |
| NM_027356 | Ufsp1         | 4 |
| NM_027598 | 4921524L21Rik | 4 |
| NM_027617 | Spata1        | 4 |
| NM_027649 | Spats1        | 4 |
| NM_027661 | Hsfy2         | 4 |
| NM_027700 | 4933416I08Rik | 4 |
| NM_027717 | Dydc2         | 4 |
| NM_027754 | Rnf148        | 4 |
| NM_027790 | Dhrs2         | 4 |
| NM_027829 | Izumo4        | 4 |
| NM_028157 | Fam75d3       | 4 |
| NM_028266 | Col16a1       | 4 |
| NM_028312 | Ccdc12        | 4 |
| NM_028354 | Tdp1          | 4 |
| NM_028444 | Prkcdbp       | 4 |
| NM_028480 | Ceacam5       | 4 |
| NM_028483 | Cib4          | 4 |
| NM_028636 | Man2c1        | 4 |
| NM_028672 | Fam161a       | 4 |
| NM_028897 | Meil          | 4 |
| NM_029091 | Klc4          | 4 |
| NM_029144 | 4930503B20Rik | 4 |
| NM_029196 | 4930544015Rik | 4 |
| NM_029227 | Tomm201       | 4 |

|           |               |   |
|-----------|---------------|---|
| NM_029231 | Pelp1         | 4 |
| NM_029299 | Spata19       | 4 |
| NM_029306 | 1700012B09Rik | 4 |
| NM_029308 | 1700010B08Rik | 4 |
| NM_029335 | 1700026D08Rik | 4 |
| NM_029440 | Wdr95         | 4 |
| NM_029587 | 1700012A03Rik | 4 |
| NM_029597 | 1700018B08Rik | 4 |
| NM_029612 | Slamf9        | 4 |
| NM_029680 | 1700110M21Rik | 4 |
| NM_029798 | Flywch2       | 4 |
| NM_029803 | Ifi2712a      | 4 |
| NM_029832 | Ddrgk1        | 4 |
| NM_029916 | Stk31         | 4 |
| NM_030047 | 4930458L03Rik | 4 |
| NM_030082 | Hist3h2ba     | 4 |
| NM_030106 | Tmsb15a       | 4 |
| NM_030150 | Dhx58         | 4 |
| NM_030192 | 4930562C15Rik | 4 |
| NM_030240 | 2900092E17Rik | 4 |
| NM_030251 | Abtb1         | 4 |
| NM_030609 | Hist1h1a      | 4 |
| NM_030720 | Gpr84         | 4 |
| NM_031368 | Bglap-rs1     | 4 |
| NM_033042 | Tnfrsf25      | 4 |
| NM_033074 | Tars          | 4 |
| NM_033612 | Cela1         | 4 |
| NM_052835 | Rpl10         | 4 |
| NM_053071 | Cox6c         | 4 |
| NM_053156 | Allc          | 4 |
| NM_053162 | Mrpl34        | 4 |
| NM_053241 | Cldn16        | 4 |
| NM_054042 | Cd248         | 4 |
| NM_054045 | Hist2h3c2-ps  | 4 |
| NM_080470 | Smc1b         | 4 |
| NM_080635 | Eif3h         | 4 |
| NM_130876 | Krtap16-9     | 4 |
| NM_133770 | Adck4         | 4 |
| NM_133857 | Usp53         | 4 |
| NM_133902 | Sdsl          | 4 |
| NM_133918 | Emilin1       | 4 |
| NM_133949 | Ptov1         | 4 |
| NM_134101 | Psmd2         | 4 |
| NM_134160 | Mcoln3        | 4 |
| NM_134185 | Vmn1r9        | 4 |
| NM_138311 | Hlfoo         | 4 |
| NM_138676 | Shkbp1        | 4 |
| NM_138747 | Nop2          | 4 |
| NM_139220 | Defb7         | 4 |
| NM_139221 | Defb11        | 4 |
| NM_144512 | Slc6a13       | 4 |
| NM_144844 | Pcca          | 4 |
| NM_144872 | Em13          | 4 |
| NM_144897 | Apoalbp       | 4 |

|           |               |   |
|-----------|---------------|---|
| NM_144923 | Blvrb         | 4 |
| NM_145380 | Eif3m         | 4 |
| NM_145421 | Fam108a       | 4 |
| NM_145482 | Setd4         | 4 |
| NM_145549 | Efcab7        | 4 |
| NM_145594 | Fgl1          | 4 |
| NM_145692 | Lrrc67        | 4 |
| NM_145954 | Aldh16a1      | 4 |
| NM_145987 | Tmem82        | 4 |
| NM_146061 | Prr5          | 4 |
| NM_146093 | Ubxn1         | 4 |
| NM_146117 | Lrrc26        | 4 |
| NM_146129 | Pcif1         | 4 |
| NM_146176 | Cnot3         | 4 |
| NM_146183 | Zfp428        | 4 |
| NM_146247 | Mettl22       | 4 |
| NM_146263 | Olfr1274-ps   | 4 |
| NM_146299 | Olfr745       | 4 |
| NM_146365 | Olfr1094      | 4 |
| NM_146437 | Olfr996       | 4 |
| NM_146665 | Olfr732       | 4 |
| NM_146697 | Olfr1442      | 4 |
| NM_146788 | Olfr1245      | 4 |
| NM_146821 | Olfr629       | 4 |
| NM_146855 | Olfr985       | 4 |
| NM_147004 | Olfr399       | 4 |
| NM_147030 | Olfr1134      | 4 |
| NM_152824 | Rbm17         | 4 |
| NM_152944 | Mmp21         | 4 |
| NM_153067 | Mrgpra3       | 4 |
| NM_153109 | Tgif2lx1      | 4 |
| NM_153152 | 2410015M20Rik | 4 |
| NM_153527 | Dnajb13       | 4 |
| NM_153547 | Gn13          | 4 |
| NM_153551 | Dennd1c       | 4 |
| NM_153576 | Cxcl17        | 4 |
| NM_153798 | Polr2b        | 4 |
| NM_170684 | Cpne7         | 4 |
| NM_172145 | Fam176b       | 4 |
| NM_172148 | B9d2          | 4 |
| NM_172149 | Bnip1         | 4 |
| NM_172259 | Myl6b         | 4 |
| NM_172372 | Wdr45         | 4 |
| NM_172580 | Acot6         | 4 |
| NM_172763 | Zfp809        | 4 |
| NM_172850 | Ankmy1        | 4 |
| NM_172900 | Siglecg       | 4 |
| NM_172926 | Snx14         | 4 |
| NM_172927 | Col6a6        | 4 |
| NM_172988 | Fbxl4         | 4 |
| NM_173012 | Letm2         | 4 |
| NM_173445 | Rccd1         | 4 |
| NM_173739 | Galnt14       | 4 |
| NM_173788 | Npr2          | 4 |



|           |               |   |
|-----------|---------------|---|
| NM_175000 | Hbq1a         | 4 |
| NM_175210 | Abca12        | 4 |
| NM_175259 | Shisa4        | 4 |
| NM_175382 | Fam72a        | 4 |
| NM_175658 | Hist1h2aa     | 4 |
| NM_175659 | Hist1h2ah     | 4 |
| NM_175660 | Hist1h2ab     | 4 |
| NM_175661 | Hist1h2af     | 4 |
| NM_175662 | Hist2h2ac     | 4 |
| NM_175666 | Hist2h2bb     | 4 |
| NM_175935 | G6pc3         | 4 |
| NM_176834 | Rnf208        | 4 |
| NM_177030 | Dock6         | 4 |
| NM_177150 | Cenpt         | 4 |
| NM_177230 | Ccdc158       | 4 |
| NM_177321 | Mia2          | 4 |
| NM_177576 | Sun3          | 4 |
| NM_177631 | BC048502      | 4 |
| NM_177671 | Epha10        | 4 |
| NM_177690 | Nlrp2         | 4 |
| NM_177693 | Lim2          | 4 |
| NM_177738 | BC048671      | 4 |
| NM_177889 | Zfp82         | 4 |
| NM_177992 | Gmpr2         | 4 |
| NM_178035 | Fads6         | 4 |
| NM_178051 | Mterfd2       | 4 |
| NM_178182 | Hist1h2ai     | 4 |
| NM_178183 | Hist1h2ak     | 4 |
| NM_178184 | Hist1h2an     | 4 |
| NM_178186 | Hist1h2ag     | 4 |
| NM_178187 | Hist1h2ae     | 4 |
| NM_178188 | Hist1h2ad     | 4 |
| NM_178189 | Hist1h2ac     | 4 |
| NM_178192 | Hist1h4a      | 4 |
| NM_178193 | Hist1h4b      | 4 |
| NM_178195 | Hist1h2bf     | 4 |
| NM_178198 | Hist1h2bj     | 4 |
| NM_178203 | Hist1h3b      | 4 |
| NM_178204 | Hist1h3d      | 4 |
| NM_178208 | Hist1h4c      | 4 |
| NM_178212 | Hist2h2aa2    | 4 |
| NM_178215 | Hist2h3b      | 4 |
| NM_178216 | Hist2h3c1     | 4 |
| NM_178218 | Hist3h2a      | 4 |
| NM_178380 | Dhx38         | 4 |
| NM_178387 | Spata18       | 4 |
| NM_178390 | Fam53a        | 4 |
| NM_178414 | Acsm4         | 4 |
| NM_178758 | Acsm5         | 4 |
| NM_178923 | Scaf4         | 4 |
| NM_181591 | Txndc3        | 4 |
| NM_183046 | Kif20b        | 4 |
| NM_183155 | BC002230      | 4 |
| NM_183254 | 1700025K23Rik | 4 |

|              |               |   |
|--------------|---------------|---|
| NM_183309    | Gm5111        | 4 |
| NM_194058    | Nlrp9b        | 4 |
| NM_194339    | Bms1          | 4 |
| NM_198308    | Pdpr          | 4 |
| NM_198622    | Hlfx          | 4 |
| NM_198637    | 1700016K19Rik | 4 |
| NM_198650    | Slc22a20      | 4 |
| NM_198669    | Prb1          | 4 |
| NM_199055    | Chst9         | 4 |
| NM_199066    | Ssxb9         | 4 |
| NM_199257    | Tpte          | 4 |
| NM_199467    | Mms221        | 4 |
| NM_201364    | BC055324      | 4 |
| NM_207242    | Npc111        | 4 |
| NM_212483    | Krt42         | 4 |
| NR_000004    | Snord35b      | 4 |
| NR_001277    | Snord33       | 4 |
| NR_001460    | Rmrp          | 4 |
| NR_002901    | Snora68       | 4 |
| NR_003559    | Mrpl48        | 4 |
| NR_029602    | Mir30e        | 4 |
| NR_029649    | Mir298        | 4 |
| NR_029719    | Mir148a       | 4 |
| NR_029731    | Mirlet7f-1    | 4 |
| NR_029752    | Mir129-2      | 4 |
| NR_029806    | Mir221        | 4 |
| NR_029958    | Mir429        | 4 |
| NR_029963    | Mir450-1      | 4 |
| NR_030154    | Mir471        | 4 |
| NR_030250    | Mir489        | 4 |
| NR_030465    | Mir692-1      | 4 |
| NR_030496    | Mir501        | 4 |
| NR_030500    | Mir721        | 4 |
| NR_030531    | Mir742        | 4 |
| NR_030532    | Mir743        | 4 |
| NR_030538    | Mir880        | 4 |
| NR_030544    | Mir874        | 4 |
| NR_030579    | Mir92b        | 4 |
| NR_030612    | Mir653        | 4 |
| NR_030689    | 4930539J05Rik | 4 |
| NR_030713    | Mir183        | 4 |
| NR_033306    | Ndufs6        | 4 |
| NR_033452    | Gm4013        | 4 |
| NR_035439    | Mir1892       | 4 |
| NR_035444    | Mir1907       | 4 |
| NR_035454    | Mir1933       | 4 |
| NR_035478    | Mir1953       | 4 |
| NR_035499    | Mir1971       | 4 |
| NR_037287    | Mir344g       | 4 |
| NM_001001332 | BC117090      | 3 |
| NM_001001450 | Ssxb2         | 3 |
| NM_001001714 | Sohlh1        | 3 |
| NM_001001983 | Pi4ka         | 3 |
| NM_001003949 | ORF61         | 3 |

|              |               |   |
|--------------|---------------|---|
| NM_001005767 | Par1          | 3 |
| NM_001007582 | AY761184      | 3 |
| NM_001008428 | Fbxw20        | 3 |
| NM_001011532 | Olfr1037      | 3 |
| NM_001012638 | Acd           | 3 |
| NM_001012726 | Aym1          | 3 |
| NM_001013745 | Zfp57         | 3 |
| NM_001013750 | Gm597         | 3 |
| NM_001013764 | Ces1a         | 3 |
| NM_001013799 | A530098C11Rik | 3 |
| NM_001014394 | Gpr113        | 3 |
| NM_001014398 | Treg1         | 3 |
| NM_001024714 | Cma2          | 3 |
| NM_001024920 | Trp53i13      | 3 |
| NM_001025365 | Miip          | 3 |
| NM_001025561 | Pus1          | 3 |
| NM_001025574 | 5430413K10Rik | 3 |
| NM_001025607 | Gm5168        | 3 |
| NM_001029990 | Mettl17       | 3 |
| NM_001030274 | Ndufs5        | 3 |
| NM_001030296 | Prr7          | 3 |
| NM_001033283 | Gm97          | 3 |
| NM_001033297 | Gm561         | 3 |
| NM_001033371 | Lrrc36        | 3 |
| NM_001033373 | Cdk15         | 3 |
| NM_001033400 | Gm806         | 3 |
| NM_001033407 | Gm815         | 3 |
| NM_001033419 | Ceacam16      | 3 |
| NM_001033433 | Tmem102       | 3 |
| NM_001033490 | Pus11         | 3 |
| NM_001033498 | Gramd2        | 3 |
| NM_001033531 | Klh132        | 3 |
| NM_001033770 | Gm904         | 3 |
| NM_001033786 | 4930428E23Rik | 3 |
| NM_001034102 | Gm5800        | 3 |
| NM_001037634 | Plac11        | 3 |
| NM_001037741 | Gpx4          | 3 |
| NM_001037752 | Defb45        | 3 |
| NM_001037927 | Wdr93         | 3 |
| NM_001037933 | Defb23        | 3 |
| NM_001039238 | Dcpp2         | 3 |
| NM_001039392 | Tmsb10        | 3 |
| NM_001040669 | Gm5169        | 3 |
| NM_001044380 | Hhip11        | 3 |
| NM_001044382 | Prok1         | 3 |
| NM_001044750 | Banf2         | 3 |
| NM_001045516 | Proca1        | 3 |
| NM_001045532 | Pr12c1        | 3 |
| NM_001077633 | Dcpp3         | 3 |
| NM_001077694 | Dysf          | 3 |
| NM_001079931 | Gm5347        | 3 |
| NM_001081043 | Ptpn23        | 3 |
| NM_001081107 | Helq          | 3 |
| NM_001081197 | Apobec4       | 3 |

|              |               |   |
|--------------|---------------|---|
| NM_001081291 | Ccdc88b       | 3 |
| NM_001081325 | Sult2a6       | 3 |
| NM_001081402 | Wdr70         | 3 |
| NM_001081406 | Lrr1          | 3 |
| NM_001081418 | Gltscr1       | 3 |
| NM_001081452 | LOC100009614  | 3 |
| NM_001081657 | Gm5935        | 3 |
| NM_001081661 | 4930524E20Rik | 3 |
| NM_001081680 | Zfp72         | 3 |
| NM_001081978 | Amelx         | 3 |
| NM_001082532 | Pigyl         | 3 |
| NM_001082543 | Stfal         | 3 |
| NM_001082546 | BC100530      | 3 |
| NM_001082547 | Gm5483        | 3 |
| NM_001085393 | Spaca5        | 3 |
| NM_001085491 | 1700125D06Rik | 3 |
| NM_001085493 | 2310030N02Rik | 3 |
| NM_001085505 | Gm572         | 3 |
| NM_001085532 | Gm13276       | 3 |
| NM_001098799 | Tox2          | 3 |
| NM_001098841 | Gm13278       | 3 |
| NM_001099325 | Gm10488       | 3 |
| NM_001099347 | Gm10230       | 3 |
| NM_001099919 | Gm10147       | 3 |
| NM_001100445 | Gm2030        | 3 |
| NM_001100609 | Gm10487       | 3 |
| NM_001100610 | Gm14632       | 3 |
| NM_001101531 | Gm5538        | 3 |
| NM_001102404 | Acp5          | 3 |
| NM_001102660 | Gm2663        | 3 |
| NM_001102677 | Gm1993        | 3 |
| NM_001102678 | Gm10096       | 3 |
| NM_001104946 | Gm2012        | 3 |
| NM_001109969 | Gm10058       | 3 |
| NM_001109970 | Gm10486       | 3 |
| NM_001110250 | Gm14819       | 3 |
| NM_001110331 | Eci2          | 3 |
| NM_001113356 | Clrb          | 3 |
| NM_001113550 | 4833420G17Rik | 3 |
| NM_001114754 | Gm6121        | 3 |
| NM_001122682 | Vmn1r132      | 3 |
| NM_001122977 | Gm7168        | 3 |
| NM_001123371 | Pnp2          | 3 |
| NM_001128625 | Gm364         | 3 |
| NM_001130149 | Drosha        | 3 |
| NM_001136065 | Hipk2         | 3 |
| NM_001136090 | Poli          | 3 |
| NM_001136237 | Slc39a5       | 3 |
| NM_001136476 | Slx           | 3 |
| NM_001145637 | Gm1661        | 3 |
| NM_001145660 | Rfx8          | 3 |
| NM_001146057 | Acot7         | 3 |
| NM_001159401 | Upp1          | 3 |
| NM_001159581 | Mutyh         | 3 |

|              |               |   |
|--------------|---------------|---|
| NM_001160038 | Ndufs1        | 3 |
| NM_001160252 | Cabp2         | 3 |
| NM_001161623 | Cdc45         | 3 |
| NM_001161628 | Efcab6        | 3 |
| NM_001161824 | Mtx1          | 3 |
| NM_001162364 | Gm14525       | 3 |
| NM_001162503 | Sqrd1         | 3 |
| NM_001162878 | Fam183b       | 3 |
| NM_001163042 | Haus8         | 3 |
| NM_001163247 | Birc7         | 3 |
| NM_001163282 | Gdf1          | 3 |
| NM_001163440 | Mov10         | 3 |
| NM_001163530 | Prl           | 3 |
| NM_001163551 | 4930432K09Rik | 3 |
| NM_001163718 | 0610007P22Rik | 3 |
| NM_001163819 | Fance         | 3 |
| NM_001164187 | Nagk          | 3 |
| NM_001164525 | Tstd1         | 3 |
| NM_001164559 | Trmt1         | 3 |
| NM_001164669 | Dnahc6        | 3 |
| NM_001164735 | Crlf2         | 3 |
| NM_001165929 | Ccdc78        | 3 |
| NM_001170632 | Fcamr         | 3 |
| NM_001172146 | Aimp2         | 3 |
| NM_001174099 | Krt36         | 3 |
| NM_001177481 | Gm10104       | 3 |
| NM_001177522 | Gm14850       | 3 |
| NM_001177528 | Gm15315       | 3 |
| NM_001177652 | Gm5886        | 3 |
| NM_001177877 | 1700108M19Rik | 3 |
| NM_001184980 | Sult2a5       | 3 |
| NM_001190473 | Dapk3         | 3 |
| NM_001199246 | Maged2        | 3 |
| NM_001199840 | Olfr1354      | 3 |
| NM_001199945 | Serpine3      | 3 |
| NM_001201323 | 5430421N21Rik | 3 |
| NM_001201391 | Beta-s        | 3 |
| NM_001204340 | Gucylb2       | 3 |
| NM_007409    | Adh1          | 3 |
| NM_007494    | Ass1          | 3 |
| NM_007512    | Atpif1        | 3 |
| NM_007527    | Bax           | 3 |
| NM_007618    | Serpina6      | 3 |
| NM_007638    | Cct7          | 3 |
| NM_007675    | Ceacam10      | 3 |
| NM_007710    | Ckm           | 3 |
| NM_007745    | Cort          | 3 |
| NM_007753    | Cpa3          | 3 |
| NM_007812    | Cyp2a5        | 3 |
| NM_007851    | Defa5         | 3 |
| NM_007893    | E4f1          | 3 |
| NM_007954    | Ces1c         | 3 |
| NM_007989    | Foxh1         | 3 |
| NM_007991    | Fbl           | 3 |

|           |          |   |
|-----------|----------|---|
| NM_008034 | Folr1    | 3 |
| NM_008044 | Fxn      | 3 |
| NM_008074 | Gabrg3   | 3 |
| NM_008084 | Gapdh    | 3 |
| NM_008119 | Gip      | 3 |
| NM_008145 | Gnrh1    | 3 |
| NM_008146 | Golga3   | 3 |
| NM_008160 | Gpx1     | 3 |
| NM_008219 | Hbb-bh1  | 3 |
| NM_008226 | Hcn2     | 3 |
| NM_008272 | Hoxc9    | 3 |
| NM_008291 | Hsd17b3  | 3 |
| NM_008311 | Htr2b    | 3 |
| NM_008356 | I113ra2  | 3 |
| NM_008406 | Itih1    | 3 |
| NM_008470 | Krt16    | 3 |
| NM_008480 | Lama1    | 3 |
| NM_008498 | Lhx1     | 3 |
| NM_008517 | Lta4h    | 3 |
| NM_008518 | Ltb      | 3 |
| NM_008570 | Mcpt1    | 3 |
| NM_008646 | Mug2     | 3 |
| NM_008763 | Olfrl6   | 3 |
| NM_008791 | Pcp4     | 3 |
| NM_008803 | Pde8a    | 3 |
| NM_008852 | Pitx3    | 3 |
| NM_008889 | Ppp1r14b | 3 |
| NM_008936 | Prop1    | 3 |
| NM_008950 | Psmc5    | 3 |
| NM_008953 | Psp      | 3 |
| NM_008954 | Pspn     | 3 |
| NM_009034 | Rbp2     | 3 |
| NM_009052 | Bex1     | 3 |
| NM_009077 | Rpl18    | 3 |
| NM_009082 | Rpl29    | 3 |
| NM_009093 | Rps29    | 3 |
| NM_009112 | S100a10  | 3 |
| NM_009114 | S100a9   | 3 |
| NM_009116 | Prrx2    | 3 |
| NM_009118 | Sag      | 3 |
| NM_009171 | Shmt1    | 3 |
| NM_009207 | Slc4a2   | 3 |
| NM_009286 | Sult2a2  | 3 |
| NM_009299 | Sva      | 3 |
| NM_009350 | Adad1    | 3 |
| NM_009405 | Tnni2    | 3 |
| NM_009429 | Tpt1     | 3 |
| NM_009435 | Tssk1    | 3 |
| NM_009448 | Tubal3   | 3 |
| NM_009529 | Gm4836   | 3 |
| NM_009532 | Xrcc1    | 3 |
| NM_009696 | ApoE     | 3 |
| NM_009698 | Aprt     | 3 |
| NM_009710 | Art1     | 3 |

|           |          |   |
|-----------|----------|---|
| NM_009737 | Bcat2    | 3 |
| NM_009776 | Serping1 | 3 |
| NM_009800 | Car11    | 3 |
| NM_009860 | Cdc25c   | 3 |
| NM_009941 | Cox4i1   | 3 |
| NM_009948 | Cpt1b    | 3 |
| NM_010057 | Dlx6     | 3 |
| NM_010084 | Adam18   | 3 |
| NM_010085 | Adam26a  | 3 |
| NM_010168 | F2       | 3 |
| NM_010184 | Fcer1a   | 3 |
| NM_010247 | Xrcc6    | 3 |
| NM_010261 | Rabac1   | 3 |
| NM_010361 | Gstt2    | 3 |
| NM_010371 | Gzmc     | 3 |
| NM_010381 | H2-Ea-ps | 3 |
| NM_010398 | H2-T23   | 3 |
| NM_010421 | Hexa     | 3 |
| NM_010663 | Krt17    | 3 |
| NM_010679 | Lalba    | 3 |
| NM_010724 | Psmb8    | 3 |
| NM_010748 | Lyst     | 3 |
| NM_010766 | Marco    | 3 |
| NM_010768 | Matk     | 3 |
| NM_010775 | Mb11     | 3 |
| NM_010858 | Myl4     | 3 |
| NM_010909 | Nfkb11   | 3 |
| NM_011150 | Lgals3bp | 3 |
| NM_011193 | Pstpip1  | 3 |
| NM_011242 | Rasgrp2  | 3 |
| NM_011272 | Rln1     | 3 |
| NM_011296 | Rps18    | 3 |
| NM_011304 | Ruvbl2   | 3 |
| NM_011328 | Sct      | 3 |
| NM_011329 | Cc11     | 3 |
| NM_011355 | Sfpil    | 3 |
| NM_011359 | Sftpc    | 3 |
| NM_011367 | Shbg     | 3 |
| NM_011413 | C4a      | 3 |
| NM_011436 | Sor11    | 3 |
| NM_011530 | Tap2     | 3 |
| NM_011540 | Tcap     | 3 |
| NM_011574 | Cirh1a   | 3 |
| NM_011659 | Tnfrsf4  | 3 |
| NM_011664 | Ubb      | 3 |
| NM_011681 | Scgbl1a1 | 3 |
| NM_011747 | Zfp13    | 3 |
| NM_011819 | Gdf15    | 3 |
| NM_011830 | Impdh2   | 3 |
| NM_011985 | Mmp23    | 3 |
| NM_011988 | Slc27a3  | 3 |
| NM_012013 | Figla    | 3 |
| NM_012033 | Tinag    | 3 |
| NM_013475 | Apoh     | 3 |

|           |           |   |
|-----------|-----------|---|
| NM_013478 | Azgp1     | 3 |
| NM_013485 | C9        | 3 |
| NM_013541 | Gstp1     | 3 |
| NM_013564 | Insl3     | 3 |
| NM_013585 | Psemb9    | 3 |
| NM_013591 | Madcaml   | 3 |
| NM_013637 | Prm1      | 3 |
| NM_013640 | Psemb10   | 3 |
| NM_013653 | Ccl5      | 3 |
| NM_013717 | B9d1      | 3 |
| NM_013734 | Atp1a4    | 3 |
| NM_013783 | Mme11     | 3 |
| NM_013859 | Znhit2-ps | 3 |
| NM_013897 | Timm8b    | 3 |
| NM_013909 | Fbxl6     | 3 |
| NM_016698 | Rnf10     | 3 |
| NM_016702 | Agxt      | 3 |
| NM_016740 | S100a11   | 3 |
| NM_016749 | Mybph     | 3 |
| NM_016772 | Ech1      | 3 |
| NM_016914 | Prg3      | 3 |
| NM_017371 | Hpx       | 3 |
| NM_017394 | Slc7a10   | 3 |
| NM_018758 | Apba3     | 3 |
| NM_018762 | Gp9       | 3 |
| NM_018803 | Syt10     | 3 |
| NM_018855 | Gas8      | 3 |
| NM_018857 | Msln      | 3 |
| NM_019398 | Ear5      | 3 |
| NM_019434 | Mcm3ap    | 3 |
| NM_019435 | Ndufb11   | 3 |
| NM_019442 | Stk19     | 3 |
| NM_019443 | Ndufa1    | 3 |
| NM_019458 | Paf1      | 3 |
| NM_019489 | Ppie      | 3 |
| NM_019652 | Asna1     | 3 |
| NM_019738 | Nupr1     | 3 |
| NM_019752 | Htra2     | 3 |
| NM_019784 | Tex21     | 3 |
| NM_019791 | Maged1    | 3 |
| NM_019800 | Acp6      | 3 |
| NM_019871 | Amac1     | 3 |
| NM_019910 | Dcppl     | 3 |
| NM_019932 | Pf4       | 3 |
| NM_019960 | Hspb3     | 3 |
| NM_020019 | Magea6    | 3 |
| NM_020021 | Mos       | 3 |
| NM_020024 | Taf10     | 3 |
| NM_020033 | Ankrd2    | 3 |
| NM_020284 | Ctsr      | 3 |
| NM_020487 | Prss21    | 3 |
| NM_020492 | Glra1     | 3 |
| NM_020516 | Slc16a8   | 3 |
| NM_020560 | Mrps31    | 3 |



|           |               |   |
|-----------|---------------|---|
| NM_020563 | Apbh          | 3 |
| NM_020565 | Sult3a1       | 3 |
| NM_020566 | Dnajc4        | 3 |
| NM_021289 | Smr2          | 3 |
| NM_021370 | Accn5         | 3 |
| NM_021392 | Ap4m1         | 3 |
| NM_021452 | Kcnmb4        | 3 |
| NM_021453 | Pga5          | 3 |
| NM_021498 | Pole3         | 3 |
| NM_021519 | Edf1          | 3 |
| NM_021549 | Pnkp          | 3 |
| NM_022020 | Rbp7          | 3 |
| NM_022322 | Tnmd          | 3 |
| NM_022816 | Acot10        | 3 |
| NM_022996 | Ndfip1        | 3 |
| NM_023065 | Ifi30         | 3 |
| NM_023331 | Mrpl46        | 3 |
| NM_023422 | Hist1h2bc     | 3 |
| NM_023479 | Elac2         | 3 |
| NM_023536 | Mrto4         | 3 |
| NM_023697 | Rdh14         | 3 |
| NM_023707 | 1810009J06Rik | 3 |
| NM_023712 | Spns1         | 3 |
| NM_023741 | Pr18a8        | 3 |
| NM_024213 | Anapc4        | 3 |
| NM_024248 | Cars2         | 3 |
| NM_024250 | Phf10         | 3 |
| NM_024444 | Cyp4f18       | 3 |
| NM_025271 | Act17b        | 3 |
| NM_025274 | Dppa5a        | 3 |
| NM_025329 | Tctex1d2      | 3 |
| NM_025370 | 1110018J18Rik | 3 |
| NM_025440 | Mrps16        | 3 |
| NM_025455 | Ccdc28b       | 3 |
| NM_025463 | 1810009A15Rik | 3 |
| NM_025469 | Clps          | 3 |
| NM_025486 | Tmem208       | 3 |
| NM_025488 | 1700001K19Rik | 3 |
| NM_025551 | Ndufa12       | 3 |
| NM_025582 | 2810405K02Rik | 3 |
| NM_025587 | Rps21         | 3 |
| NM_025589 | Rpl36a1       | 3 |
| NM_025624 | Pomp          | 3 |
| NM_025628 | Cox6b1        | 3 |
| NM_025631 | Bpil1         | 3 |
| NM_025686 | Brf2          | 3 |
| NM_025719 | Nkap1         | 3 |
| NM_025724 | 4921510H08Rik | 3 |
| NM_025727 | Klh110        | 3 |
| NM_025731 | Hras1s5       | 3 |
| NM_025748 | Adat2         | 3 |
| NM_025750 | 4933417A18Rik | 3 |
| NM_025752 | 4933411K16Rik | 3 |
| NM_025772 | Dtnbp1        | 3 |

|           |               |   |
|-----------|---------------|---|
| NM_025784 | Bcs11         | 3 |
| NM_025796 | Mrpl33        | 3 |
| NM_025919 | Rpl11         | 3 |
| NM_025990 | 2310021H06Rik | 3 |
| NM_026020 | Rplp2         | 3 |
| NM_026073 | Rab15         | 3 |
| NM_026095 | Snrpd3        | 3 |
| NM_026104 | Tmco5         | 3 |
| NM_026125 | Fam132a       | 3 |
| NM_026273 | 4930453N24Rik | 3 |
| NM_026307 | Cuta          | 3 |
| NM_026347 | Iah1          | 3 |
| NM_026378 | Dalrd3        | 3 |
| NM_026415 | 2310002J15Rik | 3 |
| NM_026530 | Mpnd          | 3 |
| NM_026549 | Pdcd21        | 3 |
| NM_026612 | Ndufb2        | 3 |
| NM_026686 | 0610011F06Rik | 3 |
| NM_026713 | Mogat1        | 3 |
| NM_026714 | Ccdc163       | 3 |
| NM_026732 | Mrpl14        | 3 |
| NM_026753 | Fam96b        | 3 |
| NM_026767 | Dpm3          | 3 |
| NM_026806 | Klk5          | 3 |
| NM_026841 | 1110059M19Rik | 3 |
| NM_026894 | 1500001M20Rik | 3 |
| NM_026918 | Zg16          | 3 |
| NM_026947 | Eci3          | 3 |
| NM_026961 | 2200002J24Rik | 3 |
| NM_026964 | Ccdc124       | 3 |
| NM_026975 | Bola1         | 3 |
| NM_027024 | Cst13         | 3 |
| NM_027034 | Izumo3        | 3 |
| NM_027044 | Pfdn5         | 3 |
| NM_027058 | 1700017D01Rik | 3 |
| NM_027083 | Lyzl6         | 3 |
| NM_027090 | 2300009A05Rik | 3 |
| NM_027126 | Hfe2          | 3 |
| NM_027155 | 2310061N02Rik | 3 |
| NM_027175 | Ndufaf1       | 3 |
| NM_027215 | Tmem147       | 3 |
| NM_027302 | Ctag2         | 3 |
| NM_027318 | Znhit1        | 3 |
| NM_027346 | Tacol         | 3 |
| NM_027357 | Psmc1         | 3 |
| NM_027406 | Aldh111       | 3 |
| NM_027673 | Tssk4         | 3 |
| NM_027727 | Dym           | 3 |
| NM_027784 | 5530400C23Rik | 3 |
| NM_027855 | 0610007C21Rik | 3 |
| NM_027891 | Lrwd1         | 3 |
| NM_027943 | Pdilt         | 3 |
| NM_027950 | Osgin1        | 3 |
| NM_027970 | 1700023E05Rik | 3 |

|           |               |   |
|-----------|---------------|---|
| NM_027996 | 2310021P13Rik | 3 |
| NM_028003 | Rpap3         | 3 |
| NM_028034 | Tdrd12        | 3 |
| NM_028038 | Ddx28         | 3 |
| NM_028138 | Thumpd2       | 3 |
| NM_028156 | 1700001P01Rik | 3 |
| NM_028202 | Kbtbd5        | 3 |
| NM_028276 | Utp14a        | 3 |
| NM_028281 | Pcbd2         | 3 |
| NM_028301 | Anks3         | 3 |
| NM_028434 | 2900092C05Rik | 3 |
| NM_028453 | Otud3         | 3 |
| NM_028454 | Tm7sf2        | 3 |
| NM_028499 | Lrrc69        | 3 |
| NM_028514 | Actrt1        | 3 |
| NM_028547 | Kif2b         | 3 |
| NM_028626 | Mcee          | 3 |
| NM_028632 | Fcf1          | 3 |
| NM_028669 | 4930415F15Rik | 3 |
| NM_028671 | Fam122c       | 3 |
| NM_028687 | 4930403N07Rik | 3 |
| NM_028799 | Tgm5          | 3 |
| NM_028901 | Myo18b        | 3 |
| NM_028957 | Hyal5         | 3 |
| NM_028979 | Cyp2j9        | 3 |
| NM_029020 | Abcb8         | 3 |
| NM_029086 | 5830415F09Rik | 3 |
| NM_029232 | Tmco5b        | 3 |
| NM_029297 | Dynlrb2       | 3 |
| NM_029303 | Pfn3          | 3 |
| NM_029307 | Hspb9         | 3 |
| NM_029314 | 1700013F07Rik | 3 |
| NM_029343 | Spata9        | 3 |
| NM_029372 | 1700011F14Rik | 3 |
| NM_029406 | Pih1d1        | 3 |
| NM_029557 | Tsen54        | 3 |
| NM_029582 | Txndc11       | 3 |
| NM_029623 | 3110002H16Rik | 3 |
| NM_029627 | Ly6k          | 3 |
| NM_029661 | 1700027D21Rik | 3 |
| NM_029696 | Mdh1b         | 3 |
| NM_029727 | Gsdma2        | 3 |
| NM_029796 | Lrg1          | 3 |
| NM_030037 | Mospd3        | 3 |
| NM_030101 | Pgpep11       | 3 |
| NM_030135 | 8030411F24Rik | 3 |
| NM_030237 | Spz1          | 3 |
| NM_030238 | Dync1h1       | 3 |
| NM_030679 | Myh1          | 3 |
| NM_030682 | Tlr1          | 3 |
| NM_030724 | Uck2          | 3 |
| NM_030736 | Vmn1r148      | 3 |
| NM_030742 | Vmn1r63       | 3 |
| NM_030749 | Sill          | 3 |

|           |               |   |
|-----------|---------------|---|
| NM_031192 | Ren1          | 3 |
| NM_031193 | Ren2          | 3 |
| NM_031259 | Nxf2          | 3 |
| NM_031843 | Dpp7          | 3 |
| NM_033041 | Hes7          | 3 |
| NM_033478 | Ly6g6d        | 3 |
| NM_053088 | Ifitm5        | 3 |
| NM_053251 | Gm4736        | 3 |
| NM_053267 | Selm          | 3 |
| NM_057171 | Bag6          | 3 |
| NM_080559 | Sh3bgr13      | 3 |
| NM_080638 | Mvp           | 3 |
| NM_130864 | Acaala        | 3 |
| NM_133198 | Pyg1          | 3 |
| NM_133217 | Bco2          | 3 |
| NM_133240 | Acot8         | 3 |
| NM_133660 | Ces1e         | 3 |
| NM_133701 | Prpf6         | 3 |
| NM_133711 | Spata4        | 3 |
| NM_133755 | Tubgcp2       | 3 |
| NM_133777 | Ube2s         | 3 |
| NM_133787 | Nmd3          | 3 |
| NM_133945 | Vrk3          | 3 |
| NM_133973 | Cog4          | 3 |
| NM_133997 | Apof          | 3 |
| NM_134005 | Enpp3         | 3 |
| NM_134024 | Tubg1         | 3 |
| NM_134192 | Vmn1r228      | 3 |
| NM_138646 | Hps4          | 3 |
| NM_138659 | Prpf8         | 3 |
| NM_138668 | Ufsp2         | 3 |
| NM_139140 | Spats2        | 3 |
| NM_139219 | Defb9         | 3 |
| NM_139229 | Cog8          | 3 |
| NM_139304 | Gatad2b       | 3 |
| NM_144514 | Commd1        | 3 |
| NM_144544 | 2210407C18Rik | 3 |
| NM_144547 | Amhr2         | 3 |
| NM_144804 | Depdc7        | 3 |
| NM_144834 | Serpina10     | 3 |
| NM_144860 | Mib1          | 3 |
| NM_144870 | Ndufs8        | 3 |
| NM_144890 | BC018465      | 3 |
| NM_144900 | Atplal        | 3 |
| NM_145073 | Hist1h3g      | 3 |
| NM_145154 | Angptl6       | 3 |
| NM_145431 | Nle1          | 3 |
| NM_145444 | Acot5         | 3 |
| NM_145480 | Rfc4          | 3 |
| NM_145620 | Rrp9          | 3 |
| NM_145635 | Adig          | 3 |
| NM_145852 | Ropn11        | 3 |
| NM_146020 | Gltpd2        | 3 |
| NM_146182 | Klc3          | 3 |

|           |               |   |
|-----------|---------------|---|
| NM_146217 | Aars          | 3 |
| NM_146227 | Prss50        | 3 |
| NM_146230 | Acaalb        | 3 |
| NM_146322 | Olfr187       | 3 |
| NM_146536 | Olfr313       | 3 |
| NM_146567 | Olfr843       | 3 |
| NM_146612 | Olfr968       | 3 |
| NM_146644 | Olfr1163      | 3 |
| NM_146791 | Olfr1248      | 3 |
| NM_147001 | Olfr172       | 3 |
| NM_147042 | Olfr1353      | 3 |
| NM_147076 | Olfr619       | 3 |
| NM_148942 | Serpinb6c     | 3 |
| NM_153114 | Otos          | 3 |
| NM_153115 | Spag11a       | 3 |
| NM_153176 | Spg7          | 3 |
| NM_153416 | Aaas          | 3 |
| NM_153524 | Mrgpra4       | 3 |
| NM_153556 | Pms1          | 3 |
| NM_170759 | Zfp628        | 3 |
| NM_170760 | U2af114       | 3 |
| NM_172152 | Slc24a4       | 3 |
| NM_172155 | Pr13d2        | 3 |
| NM_172156 | Pr13d3        | 3 |
| NM_172258 | Slc36a3       | 3 |
| NM_172605 | Tdrd3         | 3 |
| NM_172658 | Slco4c1       | 3 |
| NM_172746 | Hirip3        | 3 |
| NM_172818 | Tt118         | 3 |
| NM_172830 | Slc4a9        | 3 |
| NM_172875 | Adc           | 3 |
| NM_173013 | Mtap1s        | 3 |
| NM_173385 | Cilp          | 3 |
| NM_173412 | Cypt4         | 3 |
| NM_173777 | Olfm2         | 3 |
| NM_174877 | Zar1          | 3 |
| NM_174885 | Adam6a        | 3 |
| NM_175006 | Pou6f2        | 3 |
| NM_175024 | Nrn11         | 3 |
| NM_175167 | 4833413D08Rik | 3 |
| NM_175178 | Aifm3         | 3 |
| NM_175183 | Atxn712       | 3 |
| NM_175329 | Chchd10       | 3 |
| NM_175353 | Exoc6         | 3 |
| NM_175525 | D630042P16Rik | 3 |
| NM_175656 | Hist1h4i      | 3 |
| NM_176830 | Leprel4       | 3 |
| NM_177070 | Fbxw16        | 3 |
| NM_177111 | Ccdc66        | 3 |
| NM_177293 | Mtap7d3       | 3 |
| NM_177361 | Ifna12        | 3 |
| NM_177384 | Ttc16         | 3 |
| NM_177580 | Baiap212      | 3 |
| NM_177722 | 6030422M02Rik | 3 |

|           |               |   |
|-----------|---------------|---|
| NM_177779 | Ccdc42        | 3 |
| NM_177822 | Msln1         | 3 |
| NM_177867 | Spata21       | 3 |
| NM_177901 | 4933402J07Rik | 3 |
| NM_178069 | Lsg1          | 3 |
| NM_178199 | Hist1h2b1     | 3 |
| NM_178210 | Hist1h4j      | 3 |
| NM_178364 | Zfp369        | 3 |
| NM_178389 | Gale          | 3 |
| NM_178652 | Supt3h        | 3 |
| NM_178929 | Kazald1       | 3 |
| NM_181321 | Tmc6          | 3 |
| NM_181406 | Rars2         | 3 |
| NM_181540 | Tm6sf2        | 3 |
| NM_181547 | Nostrin       | 3 |
| NM_181549 | Clec18a       | 3 |
| NM_181683 | Defb37        | 3 |
| NM_181796 | Gstp2         | 3 |
| NM_181818 | Olf1r141      | 3 |
| NM_181820 | Tmc4          | 3 |
| NM_183026 | Defb14        | 3 |
| NM_183099 | Tssk5         | 3 |
| NM_183257 | Hamp2         | 3 |
| NM_183271 | Wfdc15a       | 3 |
| NM_183272 | Fam24a        | 3 |
| NM_194269 | Morn2         | 3 |
| NM_197988 | 1190005I06Rik | 3 |
| NM_198251 | Rnf133        | 3 |
| NM_198604 | Plekhg6       | 3 |
| NM_198613 | Ap2s1         | 3 |
| NM_198624 | Ubqln1        | 3 |
| NM_199023 | 4930526D03Rik | 3 |
| NM_199033 | Tsen2         | 3 |
| NM_199303 | Bpil3         | 3 |
| NM_203491 | Chrm2         | 3 |
| NM_206869 | Vmn1r180      | 3 |
| NM_206896 | Olf1r12       | 3 |
| NM_207153 | Olf1r325      | 3 |
| NM_207229 | Plac9         | 3 |
| NM_207277 | A930005I04Rik | 3 |
| NR_002903 | Snord61       | 3 |
| NR_024201 | Rnu7          | 3 |
| NR_028544 | Scarna3b      | 3 |
| NR_028555 | Snord89       | 3 |
| NR_028573 | Snora24       | 3 |
| NR_028576 | Scarna13      | 3 |
| NR_029527 | Mirlet7i      | 3 |
| NR_029558 | Mir146        | 3 |
| NR_029656 | Mirlet7d      | 3 |
| NR_029738 | Mir21         | 3 |
| NR_029748 | Mir92-2       | 3 |
| NR_029767 | Mir338        | 3 |
| NR_029783 | Mir107        | 3 |
| NR_029800 | Mir219-1      | 3 |

|              |               |   |
|--------------|---------------|---|
| NR_030242    | Mir532        | 3 |
| NR_030439    | Mir760        | 3 |
| NR_030450    | Mir681        | 3 |
| NR_030560    | Mir465b-1     | 3 |
| NR_030561    | Mir465b-2     | 3 |
| NR_030562    | Mir465c-1     | 3 |
| NR_030563    | Mir465c-2     | 3 |
| NR_030575    | Mir509        | 3 |
| NR_030603    | Mir878        | 3 |
| NR_034051    | Snora34       | 3 |
| NR_035415    | Mir1187       | 3 |
| NR_035457    | Mir1936       | 3 |
| NR_035474    | Mir669m-1     | 3 |
| NR_035475    | Mir669m-2     | 3 |
| NR_035487    | Mir1961       | 3 |
| NR_035489    | Mir1963       | 3 |
| NR_035500    | Mir1983       | 3 |
| NR_037222    | Mir3062       | 3 |
| NR_037311    | Mir3473       | 3 |
| NM_001001144 | Scap          | 2 |
| NM_001001444 | Defb29        | 2 |
| NM_001002929 | Nup85         | 2 |
| NM_001003666 | Zfp457        | 2 |
| NM_001003913 | Mars          | 2 |
| NM_001004158 | Gm5142        | 2 |
| NM_001005608 | Itgb4         | 2 |
| NM_001005859 | Rpl34         | 2 |
| NM_001007462 | Pabpn11       | 2 |
| NM_001009550 | Mup21         | 2 |
| NM_001011777 | Olf1042       | 2 |
| NM_001011852 | Olf1029       | 2 |
| NM_001011872 | Olf1034       | 2 |
| NM_001011877 | Rnase11       | 2 |
| NM_001012392 | U46068        | 2 |
| NM_001012520 | Klri1         | 2 |
| NM_001013022 | Odf3b         | 2 |
| NM_001013384 | Podn11        | 2 |
| NM_001013776 | Fbxw24        | 2 |
| NM_001017429 | Cox17         | 2 |
| NM_001024698 | Cpa2          | 2 |
| NM_001024917 | N4bp2         | 2 |
| NM_001025083 | Rhox12        | 2 |
| NM_001025084 | Rhox1         | 2 |
| NM_001029929 | Zmynd15       | 2 |
| NM_001033255 | Gm136         | 2 |
| NM_001033260 | Stox1         | 2 |
| NM_001033434 | Gm884         | 2 |
| NM_001033442 | Gm1604b       | 2 |
| NM_001033448 | Gm962         | 2 |
| NM_001033465 | 6430531B16Rik | 2 |
| NM_001034037 | 1700024G13Rik | 2 |
| NM_001034103 | Gm5941        | 2 |
| NM_001037167 | Gm5647        | 2 |
| NM_001037502 | Defb28        | 2 |

|              |               |   |
|--------------|---------------|---|
| NM_001037751 | Defb48        | 2 |
| NM_001037907 | Ripply2       | 2 |
| NM_001037932 | Gm11437       | 2 |
| NM_001038995 | Gm4787        | 2 |
| NM_001038996 | Try10         | 2 |
| NM_001039122 | Defb25        | 2 |
| NM_001039189 | Fars2         | 2 |
| NM_001039514 | Dhps          | 2 |
| NM_001039534 | Pstk          | 2 |
| NM_001039578 | Evi5l         | 2 |
| NM_001039593 | 1700015E13Rik | 2 |
| NM_001039688 | Rhox4a        | 2 |
| NM_001039689 | Rhox4c        | 2 |
| NM_001039695 | Rhox4d        | 2 |
| NM_001039696 | Rhox4f        | 2 |
| NM_001040434 | Rgag1         | 2 |
| NM_001042760 | Slc22a18      | 2 |
| NM_001042767 | Proc          | 2 |
| NM_001045483 | Mapklip1      | 2 |
| NM_001045518 | Fam83b        | 2 |
| NM_001045554 | Wfdc15b       | 2 |
| NM_001047435 | Pard6a        | 2 |
| NM_001080709 | 4930402F06Rik | 2 |
| NM_001080776 | Gm1123        | 2 |
| NM_001080812 | Cib3          | 2 |
| NM_001080963 | Ppapdcl1a     | 2 |
| NM_001081046 | Efcab3        | 2 |
| NM_001081099 | 2610002D18Rik | 2 |
| NM_001081118 | Phrf1         | 2 |
| NM_001081140 | Kcna10        | 2 |
| NM_001081172 | Frmpd1        | 2 |
| NM_001081174 | 6330545A04Rik | 2 |
| NM_001081199 | Mamdc4        | 2 |
| NM_001081243 | Filip1        | 2 |
| NM_001081330 | Dnahc2        | 2 |
| NM_001081375 | Cnfn          | 2 |
| NM_001081456 | Plcd4         | 2 |
| NM_001081651 | Rab42-ps      | 2 |
| NM_001081664 | 4833423E24Rik | 2 |
| NM_001081962 | Sap25         | 2 |
| NM_001085387 | My110         | 2 |
| NM_001085497 | Slc25a43      | 2 |
| NM_001085533 | Gm13275       | 2 |
| NM_001098840 | Gm13277       | 2 |
| NM_001099295 | 1700042G07Rik | 2 |
| NM_001099302 | Gm5640        | 2 |
| NM_001099330 | Gm12776       | 2 |
| NM_001100454 | Wfikkn1       | 2 |
| NM_001101484 | Gm4984        | 2 |
| NM_001101486 | Fam71f2       | 2 |
| NM_001101598 | Isoc2a        | 2 |
| NM_001101631 | Gm3285        | 2 |
| NM_001110316 | Zscan4f       | 2 |
| NM_001110506 | BC060267      | 2 |



|              |               |   |
|--------------|---------------|---|
| NM_001110515 | Psmg4         | 2 |
| NM_001110831 | Dnpep         | 2 |
| NM_001111143 | Cym           | 2 |
| NM_001111288 | Sco2          | 2 |
| NM_001111317 | BC048609      | 2 |
| NM_001113558 | Ucma          | 2 |
| NM_001126318 | Gm13011       | 2 |
| NM_001127686 | Gm5736        | 2 |
| NM_001128091 | Aadac12       | 2 |
| NM_001128092 | Gm765         | 2 |
| NM_001128634 | Tppp2         | 2 |
| NM_001129803 | Pcp2          | 2 |
| NM_001130030 | Catsper4      | 2 |
| NM_001130693 | Gucy2d        | 2 |
| NM_001136064 | Bsc12         | 2 |
| NM_001136556 | Fer114        | 2 |
| NM_001142539 | Gm9992        | 2 |
| NM_001142968 | BC024139      | 2 |
| NM_001146215 | Msh5          | 2 |
| NM_001146325 | Tigit         | 2 |
| NM_001159299 | Itih4         | 2 |
| NM_001159483 | Rpl19         | 2 |
| NM_001159711 | Ly96          | 2 |
| NM_001159775 | Olfcr391-ps   | 2 |
| NM_001159925 | Pax4          | 2 |
| NM_001160330 | Mocs3         | 2 |
| NM_001160412 | Triml2        | 2 |
| NM_001161419 | Atp5g1        | 2 |
| NM_001161844 | Cblc          | 2 |
| NM_001162492 | Mpst          | 2 |
| NM_001162880 | 1700007E06Rik | 2 |
| NM_001162934 | Ctxn2         | 2 |
| NM_001163189 | Enthd1        | 2 |
| NM_001163192 | Ly6g6f        | 2 |
| NM_001163318 | Gm11744       | 2 |
| NM_001163485 | Rpl30         | 2 |
| NM_001163570 | Exosc8        | 2 |
| NM_001163612 | 1700061J05Rik | 2 |
| NM_001163747 | Tmem192       | 2 |
| NM_001163772 | Scpppql       | 2 |
| NM_001163810 | 1700008P20Rik | 2 |
| NM_001164184 | Lsr           | 2 |
| NM_001164216 | Romol         | 2 |
| NM_001164627 | Arhgap8       | 2 |
| NM_001166027 | Skint11       | 2 |
| NM_001166066 | Heatr7b2      | 2 |
| NM_001166164 | Ccdc74a       | 2 |
| NM_001166350 | Serpina11     | 2 |
| NM_001166384 | Rbmyl1        | 2 |
| NM_001166480 | Ssr4          | 2 |
| NM_001167694 | Gpr19         | 2 |
| NM_001167906 | Cd101         | 2 |
| NM_001170918 | Olfcr1507     | 2 |
| NM_001177307 | Aldoa         | 2 |

|              |               |   |
|--------------|---------------|---|
| NM_001177347 | 1700092M07Rik | 2 |
| NM_001177369 | Nfkb2         | 2 |
| NM_001177401 | Spint3        | 2 |
| NM_001177420 | Fbxw28        | 2 |
| NM_001177564 | Gm4027        | 2 |
| NM_001177783 | Rfpl4b        | 2 |
| NM_001190258 | Gm9846        | 2 |
| NM_001190325 | Igll1         | 2 |
| NM_001195258 | Gm14378       | 2 |
| NM_001195601 | 1700015G11Rik | 2 |
| NM_001195727 | Gm5901        | 2 |
| NM_001195767 | Gm6772        | 2 |
| NM_001199967 | Gm11127       | 2 |
| NM_001201341 | LOC100504473  | 2 |
| NM_001201358 | 4921511M17Rik | 2 |
| NM_007428    | Agt           | 2 |
| NM_007468    | Apoa4         | 2 |
| NM_007493    | Asgr2         | 2 |
| NM_007524    | Nkx3-2        | 2 |
| NM_007535    | Bcl2a1c       | 2 |
| NM_007554    | Bmp4          | 2 |
| NM_007608    | Car5a         | 2 |
| NM_007620    | Cbr1          | 2 |
| NM_007640    | Cd1d2         | 2 |
| NM_007702    | Cidea         | 2 |
| NM_007774    | Cryga         | 2 |
| NM_007792    | Csrp2         | 2 |
| NM_007809    | Cyp17a1       | 2 |
| NM_007820    | Cyp3a16       | 2 |
| NM_007837    | Ddit3         | 2 |
| NM_007899    | Ecm1          | 2 |
| NM_007906    | Eef1a2        | 2 |
| NM_007926    | Aimp1         | 2 |
| NM_007955    | Ptprv         | 2 |
| NM_008085    | Gapdhs        | 2 |
| NM_008181    | Gstal         | 2 |
| NM_008189    | Gucal1a       | 2 |
| NM_008303    | Hspe1         | 2 |
| NM_008319    | Icam5         | 2 |
| NM_008323    | Idh3g         | 2 |
| NM_008344    | Igfbp6        | 2 |
| NM_008360    | I118          | 2 |
| NM_008418    | Kcna3         | 2 |
| NM_008437    | Napsa         | 2 |
| NM_008471    | Krt19         | 2 |
| NM_008482    | Lamb1         | 2 |
| NM_008483    | Lamb2         | 2 |
| NM_008492    | Ldhb          | 2 |
| NM_008504    | Gzmm          | 2 |
| NM_008521    | Ltc4s         | 2 |
| NM_008568    | Mcm7          | 2 |
| NM_008617    | Mdh2          | 2 |
| NM_008645    | Mug1          | 2 |
| NM_008654    | Ppp1r15a      | 2 |

|           |           |   |
|-----------|-----------|---|
| NM_008718 | Npas1     | 2 |
| NM_008819 | Pemt      | 2 |
| NM_008894 | Pold2     | 2 |
| NM_008947 | Psmc1     | 2 |
| NM_009049 | Resp18    | 2 |
| NM_009149 | Glg1      | 2 |
| NM_009150 | Selenbp1  | 2 |
| NM_009160 | Sftpd     | 2 |
| NM_009203 | Slc22a12  | 2 |
| NM_009217 | Sstr2     | 2 |
| NM_009244 | Serpinalb | 2 |
| NM_009245 | Serpinalc | 2 |
| NM_009246 | Serpinald | 2 |
| NM_009247 | Serpinale | 2 |
| NM_009482 | Utf1      | 2 |
| NM_009539 | Zap70     | 2 |
| NM_009553 | Zscan2    | 2 |
| NM_009610 | Actg2     | 2 |
| NM_009650 | Akap3     | 2 |
| NM_009692 | Apoa1     | 2 |
| NM_009716 | Atf4      | 2 |
| NM_009807 | Casp1     | 2 |
| NM_009889 | Cga       | 2 |
| NM_009897 | Ckmt1     | 2 |
| NM_009921 | Camp      | 2 |
| NM_009965 | Cryba1    | 2 |
| NM_010005 | Cyp2d10   | 2 |
| NM_010006 | Cyp2d9    | 2 |
| NM_010106 | Eef1a1    | 2 |
| NM_010257 | Gast      | 2 |
| NM_010296 | Gli1      | 2 |
| NM_010320 | Gng8      | 2 |
| NM_010331 | Gpaal     | 2 |
| NM_010375 | Gzmg      | 2 |
| NM_010377 | Hist1h1t  | 2 |
| NM_010405 | Hba-x     | 2 |
| NM_010473 | Hrc       | 2 |
| NM_010510 | Ifnb1     | 2 |
| NM_010575 | Itga2b    | 2 |
| NM_010616 | Kif12     | 2 |
| NM_010706 | Lgals4    | 2 |
| NM_010707 | Lgals6    | 2 |
| NM_010734 | Lst1      | 2 |
| NM_010816 | Morc1     | 2 |
| NM_010855 | Myh4      | 2 |
| NM_011068 | Pex11a    | 2 |
| NM_011178 | Prtn3     | 2 |
| NM_011187 | Psmb7     | 2 |
| NM_011228 | Rab33a    | 2 |
| NM_011291 | Rpl7      | 2 |
| NM_011312 | S100a5    | 2 |
| NM_011313 | S100a6    | 2 |
| NM_011575 | Tff3      | 2 |
| NM_011662 | Tyrobp    | 2 |

|           |          |       |   |
|-----------|----------|-------|---|
| NM_011709 | Wap      |       | 2 |
| NM_011741 | Zan      |       | 2 |
| NM_011827 | Hcst     |       | 2 |
| NM_011968 | Psma6    |       | 2 |
| NM_011969 | Psma7    |       | 2 |
| NM_012044 | Pla2g2e  |       | 2 |
| NM_013492 | Clu      |       | 2 |
| NM_013521 | Fpr1     |       | 2 |
| NM_013543 | H2-Ke6   |       | 2 |
| NM_013548 | Histlh3f |       | 2 |
| NM_013566 | Itgb7    |       | 2 |
| NM_013605 | Muc1     |       | 2 |
| NM_013616 | Olfr65   |       | 2 |
| NM_013619 | Olfr67   |       | 2 |
| NM_013647 | Rps16    |       | 2 |
| NM_013650 | S100a8   |       | 2 |
| NM_013709 | Sh3yl1   |       | 2 |
| NM_013762 | Rpl3     |       | 2 |
| NM_015731 | Atp9a    |       | 2 |
| NM_015793 | Fbxw14   |       | 2 |
| NM_015807 | Nt5c     |       | 2 |
| NM_016680 | Clasrp   |       | 2 |
| NM_016699 | Exosc10  |       | 2 |
| NM_016719 | Grb14    |       | 2 |
| NM_016738 | Rpl13    |       | 2 |
| NM_016764 | Prdx4    |       | 2 |
| NM_016844 | Rps28    |       | 2 |
| NM_016899 | Rab25    |       | 2 |
| NM_017366 | Acadv1   |       | 2 |
| NM_017461 |          | 1-Sep | 2 |
| NM_018749 | Eif3d    |       | 2 |
| NM_018784 | St3gal6  |       | 2 |
| NM_018827 | Cr1f1    |       | 2 |
| NM_018874 | Pnliprp1 |       | 2 |
| NM_019414 | Selenbp2 |       | 2 |
| NM_019473 | Olfr155  |       | 2 |
| NM_019569 | Fscn3    |       | 2 |
| NM_019685 | Ruvbl1   |       | 2 |
| NM_019693 | Ddx39b   |       | 2 |
| NM_019699 | Fads2    |       | 2 |
| NM_019728 | Defb4    |       | 2 |
| NM_019746 | Pdcd5    |       | 2 |
| NM_019799 | Rhcg     |       | 2 |
| NM_019816 | Aatf     |       | 2 |
| NM_019822 | Adrm1    |       | 2 |
| NM_019824 | Arpc3    |       | 2 |
| NM_019865 | Rpl36a   |       | 2 |
| NM_019953 | Cnpy2    |       | 2 |
| NM_019964 | Dnajb8   |       | 2 |
| NM_019981 | Tex101   |       | 2 |
| NM_020268 | K1k1b27  |       | 2 |
| NM_020569 | Park7    |       | 2 |
| NM_020600 | Rps14    |       | 2 |
| NM_021300 | Rhox4b   |       | 2 |

|           |               |   |
|-----------|---------------|---|
| NM_021317 | Dnajb7        | 2 |
| NM_021332 | Gplr          | 2 |
| NM_021337 | Skiv2l        | 2 |
| NM_021408 | Ush2a         | 2 |
| NM_021447 | Trim54        | 2 |
| NM_021488 | Ghr1          | 2 |
| NM_021499 | Wdr8          | 2 |
| NM_021501 | Pias4         | 2 |
| NM_022325 | Ctsz          | 2 |
| NM_022422 | Gng13         | 2 |
| NM_023058 | Pkmyt1        | 2 |
| NM_023182 | Ctrl          | 2 |
| NM_023202 | Ndufa7        | 2 |
| NM_023203 | Dctpp1        | 2 |
| NM_023294 | Ndc80         | 2 |
| NM_023320 | Plekhol       | 2 |
| NM_023529 | Ms4a10        | 2 |
| NM_023617 | Aox3          | 2 |
| NM_023627 | Isynal        | 2 |
| NM_023732 | Abcb6         | 2 |
| NM_023912 | Scyl1         | 2 |
| NM_024212 | Rpl4          | 2 |
| NM_024230 | Smtnl1        | 2 |
| NM_025288 | Stfa3         | 2 |
| NM_025350 | Cpal          | 2 |
| NM_025373 | 1110008L16Rik | 2 |
| NM_025407 | Uqcrc1        | 2 |
| NM_025458 | Tmed6         | 2 |
| NM_025491 | Susd3         | 2 |
| NM_025496 | Cdrt4         | 2 |
| NM_025499 | Eid3          | 2 |
| NM_025523 | Ndufc1        | 2 |
| NM_025571 | Pam16         | 2 |
| NM_025583 | Ctrl          | 2 |
| NM_025597 | Ndufb3        | 2 |
| NM_025620 | Rep15         | 2 |
| NM_025622 | Lgals2        | 2 |
| NM_025633 | Metap1d       | 2 |
| NM_025650 | Uqcr11        | 2 |
| NM_025652 | Gtf3a         | 2 |
| NM_025733 | 4921530L21Rik | 2 |
| NM_025738 | Cypt1         | 2 |
| NM_025763 | 4933436I01Rik | 2 |
| NM_025766 | Fam187a       | 2 |
| NM_025790 | Acot13        | 2 |
| NM_025791 | Tmem223       | 2 |
| NM_025891 | Smardc3       | 2 |
| NM_025970 | Zbtb8os       | 2 |
| NM_025973 | Pgc           | 2 |
| NM_025987 | Ndufa6        | 2 |
| NM_026025 | Zcrb1         | 2 |
| NM_026109 | Tmed11        | 2 |
| NM_026156 | Xab2          | 2 |
| NM_026298 | Ift172        | 2 |

|           |               |   |
|-----------|---------------|---|
| NM_026300 | 4930549C01Rik | 2 |
| NM_026319 | Ift74         | 2 |
| NM_026340 | Pop1          | 2 |
| NM_026370 | Myst1         | 2 |
| NM_026399 | Wdr83         | 2 |
| NM_026419 | Cela3b        | 2 |
| NM_026449 | Galnt15       | 2 |
| NM_026533 | Rps13         | 2 |
| NM_026610 | Ndufb4        | 2 |
| NM_026624 | Fam166a       | 2 |
| NM_026627 | H2afb1        | 2 |
| NM_026675 | Nudt22        | 2 |
| NM_026688 | Ndufs3        | 2 |
| NM_026730 | Gpihbp1       | 2 |
| NM_026734 | Tmem126b      | 2 |
| NM_026759 | Mrpl13        | 2 |
| NM_026765 | Uck11         | 2 |
| NM_026871 | Hint2         | 2 |
| NM_026885 | Chmp2a        | 2 |
| NM_026897 | Haghl         | 2 |
| NM_026914 | 1500032L24Rik | 2 |
| NM_026938 | Tmem160       | 2 |
| NM_026943 | Snrpd2        | 2 |
| NM_026958 | 1810035L17Rik | 2 |
| NM_027009 | Rfc3          | 2 |
| NM_027013 | Scnm1         | 2 |
| NM_027027 | Asb9          | 2 |
| NM_027041 | 1700003M02Rik | 2 |
| NM_027046 | Ccdc54        | 2 |
| NM_027063 | 1700013G24Rik | 2 |
| NM_027107 | 2310004N24Rik | 2 |
| NM_027163 | I11f8         | 2 |
| NM_027221 | Krtcap3       | 2 |
| NM_027231 | Polr2f        | 2 |
| NM_027239 | 1810065E05Rik | 2 |
| NM_027242 | 2010007H12Rik | 2 |
| NM_027259 | Polr2i        | 2 |
| NM_027260 | Vrk2          | 2 |
| NM_027306 | Zdhhc25       | 2 |
| NM_027323 | Srrd          | 2 |
| NM_027338 | Vps36         | 2 |
| NM_027344 | Cts113        | 2 |
| NM_027376 | Fuz           | 2 |
| NM_027399 | Steap1        | 2 |
| NM_027481 | Sugpl         | 2 |
| NM_027493 | Actr8         | 2 |
| NM_027603 | 4921511H03Rik | 2 |
| NM_027644 | Prss41        | 2 |
| NM_027651 | Tmem30c       | 2 |
| NM_027668 | 4933412E24Rik | 2 |
| NM_027706 | Nbas          | 2 |
| NM_027771 | Krtap7-1      | 2 |
| NM_027948 | 1700003E16Rik | 2 |
| NM_027951 | Tekt4         | 2 |

|           |               |   |
|-----------|---------------|---|
| NM_027964 | Zswim2        | 2 |
| NM_027972 | Ccdc19        | 2 |
| NM_027982 | Ppm1j         | 2 |
| NM_028046 | 1600014K23Rik | 2 |
| NM_028120 | Ccdc123       | 2 |
| NM_028158 | 1700021F07Rik | 2 |
| NM_028211 | 2210016L21Rik | 2 |
| NM_028233 | Lrpprc        | 2 |
| NM_028326 | Zfp618        | 2 |
| NM_028379 | Zdhhc4        | 2 |
| NM_028404 | Top1mt        | 2 |
| NM_028417 | Ttc9b         | 2 |
| NM_028479 | 1600027N09Rik | 2 |
| NM_028484 | 1700037C18Rik | 2 |
| NM_028544 | Rasip1        | 2 |
| NM_028568 | Dusp21        | 2 |
| NM_028598 | 2410076I21Rik | 2 |
| NM_028782 | Lonp1         | 2 |
| NM_029105 | 4930404A10Rik | 2 |
| NM_029139 | Syce11        | 2 |
| NM_029157 | Sf3a3         | 2 |
| NM_029229 | 4930557A04Rik | 2 |
| NM_029287 | 1700006E09Rik | 2 |
| NM_029290 | 1700011I03Rik | 2 |
| NM_029293 | Phpt1         | 2 |
| NM_029305 | 1700003F12Rik | 2 |
| NM_029326 | 1700018L24Rik | 2 |
| NM_029336 | 1700022P22Rik | 2 |
| NM_029361 | Wnk2          | 2 |
| NM_029365 | Med25         | 2 |
| NM_029367 | Spaca3        | 2 |
| NM_029408 | Iqcd          | 2 |
| NM_029453 | Wdr64         | 2 |
| NM_029472 | Gstt4         | 2 |
| NM_029590 | 1700010D01Rik | 2 |
| NM_029624 | Lmf1          | 2 |
| NM_029629 | Fahd2a        | 2 |
| NM_029673 | Immt          | 2 |
| NM_029685 | 1700113H08Rik | 2 |
| NM_029843 | 1700109H08Rik | 2 |
| NM_029844 | Mrap          | 2 |
| NM_029878 | Tbcd          | 2 |
| NM_029901 | Akr1c21       | 2 |
| NM_030016 | Ccdc76        | 2 |
| NM_030036 | Gm15144       | 2 |
| NM_030207 | Sfil          | 2 |
| NM_030562 | Lrfn1         | 2 |
| NM_031172 | Trim17        | 2 |
| NM_031248 | Lamtor2       | 2 |
| NM_031376 | Pik3apl       | 2 |
| NM_031393 | Syt11         | 2 |
| NM_032541 | Hamp          | 2 |
| NM_033073 | Krt7          | 2 |
| NM_033444 | Clic1         | 2 |

|           |               |   |
|-----------|---------------|---|
| NM_033568 | Snf8          | 2 |
| NM_033571 | Fkbp6         | 2 |
| NM_053176 | Hrg           | 2 |
| NM_078479 | Mrps21        | 2 |
| NM_080461 | Zfp358        | 2 |
| NM_080510 | Trim69        | 2 |
| NM_080854 | Slc34a3       | 2 |
| NM_130455 | Grin3b        | 2 |
| NM_133657 | Cyp2a12       | 2 |
| NM_133666 | Ndufv1        | 2 |
| NM_133689 | 4930579J09Rik | 2 |
| NM_133694 | Fbxl15        | 2 |
| NM_133708 | Gmppa         | 2 |
| NM_133709 | Chrd12        | 2 |
| NM_133727 | Kptn          | 2 |
| NM_133780 | Tpr           | 2 |
| NM_133794 | Qars          | 2 |
| NM_133831 | Gltscr2       | 2 |
| NM_133883 | Adprh12       | 2 |
| NM_133952 | Unc45a        | 2 |
| NM_134089 | Scrib         | 2 |
| NM_134137 | Lars          | 2 |
| NM_138586 | Exosc5        | 2 |
| NM_138597 | Atp5o         | 2 |
| NM_138653 | Bspry         | 2 |
| NM_138672 | Stab1         | 2 |
| NM_139153 | Agap3         | 2 |
| NM_144537 | Cpa5          | 2 |
| NM_145139 | Eif31         | 2 |
| NM_145147 | Gtpbp6        | 2 |
| NM_145396 | Tb13          | 2 |
| NM_145435 | Pyy           | 2 |
| NM_145474 | Cyp2d34       | 2 |
| NM_145552 | Gnl2          | 2 |
| NM_145565 | Sds           | 2 |
| NM_145580 | Tmem149       | 2 |
| NM_145932 | Osta          | 2 |
| NM_145935 | Glyat         | 2 |
| NM_145941 | Eif4g1        | 2 |
| NM_146004 | Mfsd61        | 2 |
| NM_146027 | Scrn2         | 2 |
| NM_146152 | Ipo13         | 2 |
| NM_146178 | Ccdc106       | 2 |
| NM_146205 | Armc5         | 2 |
| NM_146219 | Klhl36        | 2 |
| NM_146256 | Hpd1          | 2 |
| NM_146328 | O1fr110       | 2 |
| NM_146599 | O1fr697       | 2 |
| NM_146659 | O1fr1136      | 2 |
| NM_146717 | O1fr433       | 2 |
| NM_146813 | O1fr651       | 2 |
| NM_146829 | O1fr27        | 2 |
| NM_146830 | O1fr44        | 2 |
| NM_146878 | O1fr30        | 2 |



|           |               |   |
|-----------|---------------|---|
| NM_146879 | Olfr330       | 2 |
| NM_146903 | Olfr871       | 2 |
| NM_147039 | Olfr1414      | 2 |
| NM_147108 | Olfr979       | 2 |
| NM_147779 | Sftpb         | 2 |
| NM_148934 | Gm16517       | 2 |
| NM_152817 | Ttc27         | 2 |
| NM_153106 | Padi6         | 2 |
| NM_153195 | Fbxo7         | 2 |
| NM_153196 | Rbks          | 2 |
| NM_153503 | Rnf113a1      | 2 |
| NM_153545 | Lrrc45        | 2 |
| NM_153558 | Lcn13         | 2 |
| NM_153679 | Cpt1c         | 2 |
| NM_153783 | Paox          | 2 |
| NM_170671 | Mycbpap       | 2 |
| NM_172378 | BC026439      | 2 |
| NM_172455 | Tmprss7       | 2 |
| NM_172497 | Efhb          | 2 |
| NM_172515 | Zbbx          | 2 |
| NM_172541 | Tmem120a      | 2 |
| NM_172935 | Amdhd2        | 2 |
| NM_172960 | Adek5         | 2 |
| NM_172967 | 4930503L19Rik | 2 |
| NM_173029 | Adcy10        | 2 |
| NM_173428 | Sspo          | 2 |
| NM_173436 | Cypt2-ps      | 2 |
| NM_173741 | Wdr24         | 2 |
| NM_173774 | Slc45a1       | 2 |
| NM_173775 | Ccdc37        | 2 |
| NM_174995 | Mgst2         | 2 |
| NM_175001 | Mrpl22        | 2 |
| NM_175015 | Atp5g3        | 2 |
| NM_175033 | BC089491      | 2 |
| NM_175296 | Mael          | 2 |
| NM_175653 | Hist1h3c      | 2 |
| NM_175663 | Hist1h2ba     | 2 |
| NM_175664 | Hist1h2bb     | 2 |
| NM_175665 | Hist1h2bk     | 2 |
| NM_176843 | Ints5         | 2 |
| NM_176913 | Dpep2         | 2 |
| NM_177222 | Casc1         | 2 |
| NM_177353 | Slc9a7        | 2 |
| NM_177369 | Myh8          | 2 |
| NM_177382 | Cyp2r1        | 2 |
| NM_177589 | Ulk4          | 2 |
| NM_177597 |               | 2 |
| NM_177598 | Fbxw13        | 2 |
| NM_177615 | Slc26a10      | 2 |
| NM_177648 | Dolk          | 2 |
| NM_177711 | 4932411G14Rik | 2 |
| NM_177755 | Klh138        | 2 |
| NM_177777 | D11Wsu47e     | 2 |
| NM_177868 | Fhad1         | 2 |

11-Mar

|           |               |   |
|-----------|---------------|---|
| NM_178202 | Hist1h2bp     | 2 |
| NM_178205 | Hist1h3e      | 2 |
| NM_178213 | Hist2h2ab     | 2 |
| NM_178776 | BC049715      | 2 |
| NM_178884 | Obsl1         | 2 |
| NM_178894 | AA792892      | 2 |
| NM_180678 | Gars          | 2 |
| NM_181345 | Npm2          | 2 |
| NM_181394 | Anapc13       | 2 |
| NM_181596 | Retnlg        | 2 |
| NM_181857 | Poln          | 2 |
| NM_182783 | Fam167b       | 2 |
| NM_182785 | Lypd4         | 2 |
| NM_183038 | Defb39        | 2 |
| NM_183091 | Tonsl         | 2 |
| NM_183143 | BC048679      | 2 |
| NM_183163 | Rhbd12        | 2 |
| NM_183178 | Fsd1          | 2 |
| NM_183249 | 1100001G20Rik | 2 |
| NM_183405 | Cox6b2        | 2 |
| NM_194059 | Nanos3        | 2 |
| NM_197889 | Ifnz          | 2 |
| NM_197992 | Pcgf1         | 2 |
| NM_198019 | Cep78         | 2 |
| NM_198027 | Alkbh6        | 2 |
| NM_198628 | Gm711         | 2 |
| NM_198660 | E230008N13Rik | 2 |
| NM_198667 | BC061212      | 2 |
| NM_199036 | Fbxw15        | 2 |
| NM_199064 | Ssxb10        | 2 |
| NM_199222 | Lman11        | 2 |
| NM_201236 | Rhox4e        | 2 |
| NM_205783 | Chrm5         | 2 |
| NM_207243 | Muc19         | 2 |
| NM_207522 | BC067068      | 2 |
| NM_207531 | Agr3          | 2 |
| NM_207540 | Mrgprx1       | 2 |
| NM_207558 | Olfir750      | 2 |
| NM_207664 | Olfir151      | 2 |
| NR_024198 | Rpr13         | 2 |
| NR_028078 | Snora21       | 2 |
| NR_028515 | Snora78       | 2 |
| NR_028517 | Scarna10      | 2 |
| NR_028531 | Snord69       | 2 |
| NR_028542 | Snord8        | 2 |
| NR_028575 | Snord123      | 2 |
| NR_029532 | Mir29b-1      | 2 |
| NR_029534 | Mir30b        | 2 |
| NR_029537 | Mir101a       | 2 |
| NR_029589 | Mir202        | 2 |
| NR_029592 | Mir205        | 2 |
| NR_029654 | Mir34c        | 2 |
| NR_029657 | Mir106a       | 2 |
| NR_029716 | Mir30c-1      | 2 |

|              |             |   |
|--------------|-------------|---|
| NR_029734    | Mir16-1     | 2 |
| NR_029747    | Mir31       | 2 |
| NR_029749    | Mir93       | 2 |
| NR_029750    | Mir96       | 2 |
| NR_029756    | Mir322      | 2 |
| NR_029789    | Mir32       | 2 |
| NR_029807    | Mir222      | 2 |
| NR_029808    | Mir224      | 2 |
| NR_030149    | Mir465      | 2 |
| NR_030415    | Mir301b     | 2 |
| NR_030416    | Mir675      | 2 |
| NR_030417    | Mir744      | 2 |
| NR_030431    | Mir670      | 2 |
| NR_030448    | Mir680-2    | 2 |
| NR_030458    | Mir719      | 2 |
| NR_030463    | Mir690      | 2 |
| NR_030467    | Mir694      | 2 |
| NR_030485    | Mir704      | 2 |
| NR_030487    | Mir706      | 2 |
| NR_030491    | Mir710      | 2 |
| NR_030495    | Mir500      | 2 |
| NR_030499    | Mir505      | 2 |
| NR_030536    | Mir871      | 2 |
| NR_030541    | Mir883a     | 2 |
| NR_030545    | Mir876      | 2 |
| NR_030548    | Mir18b      | 2 |
| NR_030557    | Mir344-2    | 2 |
| NR_030558    | Mir421      | 2 |
| NR_030605    | Mir873      | 2 |
| NR_030606    | Mir875      | 2 |
| NR_030607    | Mir208b     | 2 |
| NR_030756    | Mir423      | 2 |
| NR_035426    | Mir669e     | 2 |
| NR_035446    | Mir1893     | 2 |
| NR_035466    | Mir1945     | 2 |
| NR_037206    | Mir1249     | 2 |
| NR_037212    | Mir3058     | 2 |
| NR_037219    | Mir1251     | 2 |
| NR_037228    | Mir3068     | 2 |
| NR_037242    | Mir3081     | 2 |
| NR_037244    | Mir3083     | 2 |
| NR_037275    | Mir3092     | 2 |
| NR_037283    | Mir3101     | 2 |
| NR_037284    | Mir344e     | 2 |
| NR_037680    | Snora33     | 2 |
| NR_038089    | Gm6654      | 2 |
| NM_001002895 | AI413582    | 1 |
| NM_001004147 | Fb111       | 1 |
| NM_001004191 | Gm5617      | 1 |
| NM_001007222 | Tdpoz2      | 1 |
| NM_001007571 | D8Erttd738e | 1 |
| NM_001007583 | Best3       | 1 |
| NM_001011687 | Rnase13     | 1 |
| NM_001011707 | Cyp2c66     | 1 |

|              |               |   |
|--------------|---------------|---|
| NM_001011721 | Olfr102       | 1 |
| NM_001011782 | Olfr543       | 1 |
| NM_001011854 | Olfr605       | 1 |
| NM_001013575 | Olfr112       | 1 |
| NM_001013783 | Fam71b        | 1 |
| NM_001024560 | Snx32         | 1 |
| NM_001025260 | Gm14484       | 1 |
| NM_001025383 | Gm14685       | 1 |
| NM_001025384 | DXBay18       | 1 |
| NM_001025606 | Tmem171       | 1 |
| NM_001029855 | Psme2         | 1 |
| NM_001029987 | Dox12         | 1 |
| NM_001033124 | Ntrk1         | 1 |
| NM_001033245 | Hk3           | 1 |
| NM_001033246 | Ccdc110       | 1 |
| NM_001033296 | Se1112        | 1 |
| NM_001033320 | Rltpr         | 1 |
| NM_001033362 | Gm614         | 1 |
| NM_001033438 | Gm906         | 1 |
| NM_001033455 | Ccdc27        | 1 |
| NM_001033479 | Gm1527        | 1 |
| NM_001033547 | 4922505E12Rik | 1 |
| NM_001033632 | Ifitm6        | 1 |
| NM_001033668 | Dnahc1        | 1 |
| NM_001033669 | Fbxw10        | 1 |
| NM_001033764 | 4931408C20Rik | 1 |
| NM_001033785 | Akap14        | 1 |
| NM_001033794 | Fbxw18        | 1 |
| NM_001034100 | Gm5382        | 1 |
| NM_001034903 | Gm5887        | 1 |
| NM_001037143 | 2310033E01Rik | 1 |
| NM_001037247 | Defb36        | 1 |
| NM_001038664 | Gngt2         | 1 |
| NM_001038997 | Gm5771        | 1 |
| NM_001039042 | Klk13         | 1 |
| NM_001039095 | Glt6d1        | 1 |
| NM_001039125 | Defb47        | 1 |
| NM_001039143 | Nlrp5         | 1 |
| NM_001039240 | Gm7073        | 1 |
| NM_001039495 | Ccdc108       | 1 |
| NM_001039522 | Leo1          | 1 |
| NM_001039545 | Myh2          | 1 |
| NM_001039645 | Asphd1        | 1 |
| NM_001039678 | Prhoxnb       | 1 |
| NM_001039698 | Rhox4g        | 1 |
| NM_001040686 | Zfp692        | 1 |
| NM_001042715 | Ccdc135       | 1 |
| NM_001045525 | Cyb5d1        | 1 |
| NM_001077591 | Tsks          | 1 |
| NM_001079929 | Ccdc154       | 1 |
| NM_001080552 | Gsg1          | 1 |
| NM_001081063 | Prss55        | 1 |
| NM_001081070 | Pdia2         | 1 |
| NM_001081083 | Armc3         | 1 |

|              |               |   |
|--------------|---------------|---|
| NM_001081096 | Fam154a       | 1 |
| NM_001081108 | 0910001L09Rik | 1 |
| NM_001081122 | Cep63         | 1 |
| NM_001081218 | Hcfc2         | 1 |
| NM_001081273 | 1600015I10Rik | 1 |
| NM_001081294 | Prr19         | 1 |
| NM_001081365 | 0610010012Rik | 1 |
| NM_001081688 | Tmprss9       | 1 |
| NM_001081746 | Gm7609        | 1 |
| NM_001081961 | 2300005B03Rik | 1 |
| NM_001083904 | Fetub         | 1 |
| NM_001083935 | Pth1r         | 1 |
| NM_001085499 | Gm595         | 1 |
| NM_001085537 | Gm14501       | 1 |
| NM_001098237 | Zbtb3         | 1 |
| NM_001098271 | Tmem176a      | 1 |
| NM_001098842 | Gm6812        | 1 |
| NM_001099296 | Grrp1         | 1 |
| NM_001099664 | Npw           | 1 |
| NM_001099674 | 1810022K09Rik | 1 |
| NM_001100394 | 4930505A04Rik | 1 |
| NM_001101463 | Gm4871        | 1 |
| NM_001101483 | Tmem22        | 1 |
| NM_001101597 | Gm7244        | 1 |
| NM_001101609 | Gm9376        | 1 |
| NM_001102468 | Calml4        | 1 |
| NM_001103153 | Gm10334       | 1 |
| NM_001103199 | Skint6        | 1 |
| NM_001109759 | Fam71a        | 1 |
| NM_001110009 | Apoc1         | 1 |
| NM_001110271 | Abhd14a       | 1 |
| NM_001111037 | Gm14483       | 1 |
| NM_001115085 | Tssc4         | 1 |
| NM_001122603 | Fcgbp         | 1 |
| NM_001126317 | Gm1140        | 1 |
| NM_001127346 | Ndufaf2       | 1 |
| NM_001127685 | BC048943      | 1 |
| NM_001129787 | Igsf9b        | 1 |
| NM_001136062 | Eno3          | 1 |
| NM_001142729 | Lrrc9         | 1 |
| NM_001143671 | Fam70b        | 1 |
| NM_001145360 | Gm9047        | 1 |
| NM_001146013 | Slc6a5        | 1 |
| NM_001146081 | Fancb         | 1 |
| NM_001159284 | Smtn          | 1 |
| NM_001159518 | Igfbp7        | 1 |
| NM_001159650 | Crybb3        | 1 |
| NM_001159658 | Aqp12         | 1 |
| NM_001160239 | Fau           | 1 |
| NM_001160402 | Tm4sf19       | 1 |
| NM_001160414 | Wfdc9         | 1 |
| NM_001161608 | Gm13272       | 1 |
| NM_001161737 | Sival         | 1 |
| NM_001162533 | 1700029G01Rik | 1 |

|              |               |   |
|--------------|---------------|---|
| NM_001162909 | Ncrna00085    | 1 |
| NM_001162970 | Aim11         | 1 |
| NM_001163664 | Tnnt3         | 1 |
| NM_001163945 | Rpl31         | 1 |
| NM_001164107 | Ripk3         | 1 |
| NM_001164171 | Myh6          | 1 |
| NM_001164224 | Aspscr1       | 1 |
| NM_001164329 | Gm6904        | 1 |
| NM_001164352 | Efemp2        | 1 |
| NM_001164655 | 9530053A07Rik | 1 |
| NM_001165925 | Cldn14        | 1 |
| NM_001165939 | Tshb          | 1 |
| NM_001166368 | Fkbp2         | 1 |
| NM_001166475 | 4930407I10Rik | 1 |
| NM_001166633 | Gylt11b       | 1 |
| NM_001168369 | 1700008F21Rik | 1 |
| NM_001171739 | Bag1          | 1 |
| NM_001177365 | Gm9112        | 1 |
| NM_001177502 | 1700013D24Rik | 1 |
| NM_001177580 | Gm13308       | 1 |
| NM_001177582 | Esp23         | 1 |
| NM_001185002 | Rhox13        | 1 |
| NM_001185173 | Zscan4b       | 1 |
| NM_001193619 | Cldn7         | 1 |
| NM_001195383 | 2300003K06Rik | 1 |
| NM_001195673 | Prr22         | 1 |
| NM_001199953 | Pate          | 1 |
| NM_001199955 | Ankrd60       | 1 |
| NM_007376    | Pzp           | 1 |
| NM_007425    | Ager          | 1 |
| NM_007517    | Aup1          | 1 |
| NM_007663    | Cdh16         | 1 |
| NM_007709    | Cited1        | 1 |
| NM_007942    | Epo           | 1 |
| NM_007994    | Fbp2          | 1 |
| NM_008042    | Fpr3          | 1 |
| NM_008116    | Ggt1          | 1 |
| NM_008134    | Glycam1       | 1 |
| NM_008170    | Grin2a        | 1 |
| NM_008190    | Guca2a        | 1 |
| NM_008373    | I19           | 1 |
| NM_008375    | Fabp6         | 1 |
| NM_008407    | Itih3         | 1 |
| NM_008454    | Klk1b16       | 1 |
| NM_008456    | Klk1b5        | 1 |
| NM_008457    | Klk1b8        | 1 |
| NM_008490    | Lcat          | 1 |
| NM_008496    | Lgals7        | 1 |
| NM_008503    | Rps2          | 1 |
| NM_008598    | Mgmt          | 1 |
| NM_008644    | Pro11         | 1 |
| NM_008693    | Klk1b3        | 1 |
| NM_008768    | Orml          | 1 |
| NM_008776    | Pafah1b3      | 1 |

|           |         |   |
|-----------|---------|---|
| NM_008799 | Pdcd2   | 1 |
| NM_008806 | Pde6b   | 1 |
| NM_008814 | Pdx1    | 1 |
| NM_008911 | Ppox    | 1 |
| NM_008918 | Ppy     | 1 |
| NM_008940 | Klk8    | 1 |
| NM_008951 | Psmc4   | 1 |
| NM_008955 | Rhox6   | 1 |
| NM_009076 | Rpl12   | 1 |
| NM_009081 | Rpl28   | 1 |
| NM_009091 | Rps15   | 1 |
| NM_009109 | Ryr1    | 1 |
| NM_009215 | Sst     | 1 |
| NM_009227 | Snrpe   | 1 |
| NM_009235 | Sox15   | 1 |
| NM_009355 | Prss39  | 1 |
| NM_009356 | Prss40  | 1 |
| NM_009362 | Tff1    | 1 |
| NM_009402 | Pglyrpl | 1 |
| NM_009406 | Tnni3   | 1 |
| NM_009407 | Tnp1    | 1 |
| NM_009430 | Prss2   | 1 |
| NM_009436 | Tssk2   | 1 |
| NM_009446 | Tuba3a  | 1 |
| NM_009533 | Xrcc5   | 1 |
| NM_009584 | Dnajc2  | 1 |
| NM_009596 | Abpa    | 1 |
| NM_009746 | Bcl7c   | 1 |
| NM_009778 | C3      | 1 |
| NM_009780 | C4b     | 1 |
| NM_009789 | S100g   | 1 |
| NM_009967 | Crygs   | 1 |
| NM_009975 | Csnk2b  | 1 |
| NM_009991 | Cyp11b2 | 1 |
| NM_010023 | Eci1    | 1 |
| NM_010045 | Darc    | 1 |
| NM_010061 | Dnase1  | 1 |
| NM_010088 | Pr18a2  | 1 |
| NM_010089 | Usp1715 | 1 |
| NM_010115 | Egfbp2  | 1 |
| NM_010145 | Ephx1   | 1 |
| NM_010146 | Epm2a   | 1 |
| NM_010227 | Flna    | 1 |
| NM_010240 | Ft11    | 1 |
| NM_010255 | Gamt    | 1 |
| NM_010256 | Gart    | 1 |
| NM_010351 | Gsc     | 1 |
| NM_010372 | Gzmd    | 1 |
| NM_010373 | Gzme    | 1 |
| NM_010374 | Gzmf    | 1 |
| NM_010455 | Hoxa7   | 1 |
| NM_010504 | Ifna4   | 1 |
| NM_010609 | Kcnk7   | 1 |
| NM_010639 | Klk1    | 1 |

|           |          |   |
|-----------|----------|---|
| NM_010644 | Klk1b26  | 1 |
| NM_010645 | Klk1b1   | 1 |
| NM_010694 | Lcn3     | 1 |
| NM_010725 | Lmx1b    | 1 |
| NM_010782 | Mcpt9    | 1 |
| NM_010915 | Klk1b4   | 1 |
| NM_010991 | Olfir49  | 1 |
| NM_011016 | Orm2     | 1 |
| NM_011095 | Lilrb3   | 1 |
| NM_011128 | Pnliprp2 | 1 |
| NM_011132 | Pole     | 1 |
| NM_011172 | Prodh    | 1 |
| NM_011282 | Ros1     | 1 |
| NM_011295 | Rps12    | 1 |
| NM_011331 | Ccl12    | 1 |
| NM_011332 | Ccl17    | 1 |
| NM_011340 | Serpinf1 | 1 |
| NM_011409 | Slfn3    | 1 |
| NM_011422 | Smr3a    | 1 |
| NM_011463 | Spink4   | 1 |
| NM_011542 | Tcea3    | 1 |
| NM_011577 | Tgfb1    | 1 |
| NM_011583 | Theg     | 1 |
| NM_011598 | Fabp9    | 1 |
| NM_011645 | Prss3    | 1 |
| NM_011855 | Odz1     | 1 |
| NM_011874 | Psmc4    | 1 |
| NM_011902 | Tekt2    | 1 |
| NM_011939 | Hsf4     | 1 |
| NM_011973 | Stk30    | 1 |
| NM_012016 | Ern2     | 1 |
| NM_012021 | Prdx5    | 1 |
| NM_012034 | Tpsg1    | 1 |
| NM_012053 | Rpl8     | 1 |
| NM_013474 | Apoa2    | 1 |
| NM_013499 | Cr11     | 1 |
| NM_013533 | Gpr162   | 1 |
| NM_013535 | Grcc10   | 1 |
| NM_013539 | Spsb2    | 1 |
| NM_013580 | Ldhc     | 1 |
| NM_013596 | Mc5r     | 1 |
| NM_013602 | Mt1      | 1 |
| NM_013603 | Mt3      | 1 |
| NM_013623 | Orm3     | 1 |
| NM_013677 | Surf1    | 1 |
| NM_013706 | Cd52     | 1 |
| NM_013721 | Rpl7a    | 1 |
| NM_013725 | Rps11    | 1 |
| NM_013728 | Olfir154 | 1 |
| NM_013737 | Pla2g7   | 1 |
| NM_013756 | Defb3    | 1 |
| NM_013789 | Sergef   | 1 |
| NM_013829 | Plcb4    | 1 |
| NM_013932 | Ddx25    | 1 |



|           |          |   |
|-----------|----------|---|
| NM_015789 | Dkk11    | 1 |
| NM_016667 | Sntb1    | 1 |
| NM_016755 | Atp5j    | 1 |
| NM_016763 | Hsd17b10 | 1 |
| NM_016767 | Batf     | 1 |
| NM_016876 | Eif3g    | 1 |
| NM_016902 | Nphp1    | 1 |
| NM_016959 | Rps3a    | 1 |
| NM_016966 | Phgdh    | 1 |
| NM_017369 | Gabre    | 1 |
| NM_018792 | Hils1    | 1 |
| NM_018799 | Eif3i    | 1 |
| NM_018800 | Syt6     | 1 |
| NM_018816 | Apom     | 1 |
| NM_018854 | Ift20    | 1 |
| NM_019394 | Mia1     | 1 |
| NM_019503 | Fxyd1    | 1 |
| NM_019508 | I117b    | 1 |
| NM_019582 | Cacnal1f | 1 |
| NM_019585 | Espn     | 1 |
| NM_019686 | Cib2     | 1 |
| NM_019696 | Cpxm1    | 1 |
| NM_019701 | Clcnkb   | 1 |
| NM_019750 | Nat6     | 1 |
| NM_019830 | Prmt1    | 1 |
| NM_019833 | Fam69b   | 1 |
| NM_019864 | Atr      | 1 |
| NM_019879 | Suclg1   | 1 |
| NM_019883 | Uba52    | 1 |
| NM_019977 | Miox     | 1 |
| NM_020018 | Magea5   | 1 |
| NM_020488 | Gabrq    | 1 |
| NM_020498 | Ly6i     | 1 |
| NM_020514 | Olfml5   | 1 |
| NM_020582 | Atp5j2   | 1 |
| NM_021294 | Dbil5    | 1 |
| NM_021438 | Fibp     | 1 |
| NM_021489 | F12      | 1 |
| NM_021538 | Cope     | 1 |
| NM_021541 | Cryba2   | 1 |
| NM_021898 | Tsga8    | 1 |
| NM_022879 | Myl7     | 1 |
| NM_023059 | Sigirr   | 1 |
| NM_023133 | Rps19    | 1 |
| NM_023142 | Arpc1b   | 1 |
| NM_023247 | Ndufaf3  | 1 |
| NM_023289 | Ceacam11 | 1 |
| NM_023322 | Zkscan14 | 1 |
| NM_023383 | Aadac    | 1 |
| NM_023455 | Nat8     | 1 |
| NM_023695 | Crybb1   | 1 |
| NM_023709 | Capn9    | 1 |
| NM_023738 | Uba7     | 1 |
| NM_023881 | Retnlb   | 1 |

|           |               |   |
|-----------|---------------|---|
| NM_024169 | Fkbp11        | 1 |
| NM_024176 | Drap1         | 1 |
| NM_024218 | Rpl24         | 1 |
| NM_024228 | Gdpd3         | 1 |
| NM_024253 | Nkg7          | 1 |
| NM_024279 | Spaca7        | 1 |
| NM_025280 | Kin           | 1 |
| NM_025297 | Mecr          | 1 |
| NM_025317 | Mrpl54        | 1 |
| NM_025340 | Sharpin       | 1 |
| NM_025371 | Acy1          | 1 |
| NM_025396 | Pgls          | 1 |
| NM_025424 | Nenf          | 1 |
| NM_025434 | Mrps28        | 1 |
| NM_025529 | Nudt8         | 1 |
| NM_025544 | Mrps15        | 1 |
| NM_025548 | Tbcb          | 1 |
| NM_025570 | Mrpl20        | 1 |
| NM_025577 | 2810428I15Rik | 1 |
| NM_025611 | Cul7          | 1 |
| NM_025616 | Timm50        | 1 |
| NM_025744 | 4933404M02Rik | 1 |
| NM_025758 | Asb17         | 1 |
| NM_025806 | Plbd1         | 1 |
| NM_025843 | Ndufb7        | 1 |
| NM_025936 | Rars          | 1 |
| NM_025960 | Trappc6a      | 1 |
| NM_026055 | Rpl39         | 1 |
| NM_026061 | Ndufb8        | 1 |
| NM_026063 | 2900010M23Rik | 1 |
| NM_026088 | 1700022I11Rik | 1 |
| NM_026096 | 1700054013Rik | 1 |
| NM_026159 | Retsat        | 1 |
| NM_026161 | Clqtnf4       | 1 |
| NM_026188 | 1700028P14Rik | 1 |
| NM_026290 | 4930511I11Rik | 1 |
| NM_026296 | 4930548H24Rik | 1 |
| NM_026359 | 4930578I06Rik | 1 |
| NM_026398 | Pop5          | 1 |
| NM_026459 | Ccdc70        | 1 |
| NM_026506 | Snrpg         | 1 |
| NM_026517 | Rpl2211       | 1 |
| NM_026519 | Tmem85        | 1 |
| NM_026671 | Lypd2         | 1 |
| NM_026684 | Ndufb10       | 1 |
| NM_026695 | Etfb          | 1 |
| NM_026729 | Ict1          | 1 |
| NM_026731 | Ppp1r14a      | 1 |
| NM_026795 | Tm2d3         | 1 |
| NM_026831 | Mybph1        | 1 |
| NM_026860 | Gkn3          | 1 |
| NM_026976 | Faim3         | 1 |
| NM_026982 | 1810027010Rik | 1 |
| NM_026999 | Zfp688        | 1 |

|           |               |   |
|-----------|---------------|---|
| NM_027010 | Crygf         | 1 |
| NM_027019 | Odf3          | 1 |
| NM_027049 | 1700008003Rik | 1 |
| NM_027050 | 1700008A04Rik | 1 |
| NM_027054 | Cst12         | 1 |
| NM_027059 | 1700023A16Rik | 1 |
| NM_027069 | 1700018F24Rik | 1 |
| NM_027097 | Klk12         | 1 |
| NM_027098 | Mrpl30        | 1 |
| NM_027128 | Odam          | 1 |
| NM_027204 | Mrpl12        | 1 |
| NM_027283 | 1700026L06Rik | 1 |
| NM_027340 | Lipn          | 1 |
| NM_027342 | Fam162a       | 1 |
| NM_027354 | Poc1a         | 1 |
| NM_027360 | 2010107E04Rik | 1 |
| NM_027436 | Mipep         | 1 |
| NM_027574 | Krt28         | 1 |
| NM_027587 | Micalc1       | 1 |
| NM_027588 | Nt5c1b        | 1 |
| NM_027630 | Ccdc105       | 1 |
| NM_027724 | Cage1         | 1 |
| NM_027762 | Tchh11        | 1 |
| NM_027773 | Fam57a        | 1 |
| NM_027883 | Dhx34         | 1 |
| NM_028047 | 1500002020Rik | 1 |
| NM_028063 | Trmu          | 1 |
| NM_028083 | Chaf1b        | 1 |
| NM_028151 | Skiv212       | 1 |
| NM_028198 | Xpo5          | 1 |
| NM_028369 | Mon1a         | 1 |
| NM_028376 | Pfn4          | 1 |
| NM_028394 | Hspb11        | 1 |
| NM_028477 | Pr18a1        | 1 |
| NM_028513 | Actrt2        | 1 |
| NM_028516 | 1700056E22Rik | 1 |
| NM_028528 | 1700058C13Rik | 1 |
| NM_028599 | Wdr75         | 1 |
| NM_028655 | Sat11         | 1 |
| NM_028657 | F630110N24Rik | 1 |
| NM_028659 | Eif3k         | 1 |
| NM_028826 | 14-Sep        | 1 |
| NM_028955 | 4933427G17Rik | 1 |
| NM_029008 | 4833403I15Rik | 1 |
| NM_029017 | Mrpl47        | 1 |
| NM_029044 | Lrrc48        | 1 |
| NM_029070 | Cldn26        | 1 |
| NM_029121 | Atp6v1e2      | 1 |
| NM_029152 | Efcab10       | 1 |
| NM_029264 | Tt1110        | 1 |
| NM_029280 | Mett15        | 1 |
| NM_029298 | 1700011E24Rik | 1 |
| NM_029309 | Morn5         | 1 |
| NM_029324 | 1700018C11Rik | 1 |

|           |               |   |
|-----------|---------------|---|
| NM_029339 | Ccdc101       | 1 |
| NM_029341 | Caps1         | 1 |
| NM_029353 | 2410003K15Rik | 1 |
| NM_029393 | Krt24         | 1 |
| NM_029418 | 9130401M01Rik | 1 |
| NM_029580 | Trmt5         | 1 |
| NM_029588 | 1700012L04Rik | 1 |
| NM_029599 | Sun5          | 1 |
| NM_029733 | 2010005H15Rik | 1 |
| NM_030022 | Grifin        | 1 |
| NM_030052 | Cox7b2        | 1 |
| NM_030059 | Cst11         | 1 |
| NM_030166 | Galnt12       | 1 |
| NM_030558 | Car15         | 1 |
| NM_030735 | Vmn1r172      | 1 |
| NM_030744 | Ropn1         | 1 |
| NM_031176 | Tnxb          | 1 |
| NM_031374 | Tex15         | 1 |
| NM_031395 | Syt13         | 1 |
| NM_033146 | Fam158a       | 1 |
| NM_033268 | Actn2         | 1 |
| NM_053091 | Cox4i2        | 1 |
| NM_053098 | Lmod2         | 1 |
| NM_053200 | Ces1d         | 1 |
| NM_053243 | Prss1         | 1 |
| NM_053256 | Pth2          | 1 |
| NM_053260 | Prss29        | 1 |
| NM_054073 | Tsgal3        | 1 |
| NM_054074 | Defb6         | 1 |
| NM_080728 | Myh7          | 1 |
| NM_130903 | Cd209c        | 1 |
| NM_133193 | I11r12        | 1 |
| NM_133347 | Dhx30         | 1 |
| NM_133763 | Dntt1p1       | 1 |
| NM_134139 | Wdr74         | 1 |
| NM_134147 | Macrodl       | 1 |
| NM_134193 | Vmn1r232      | 1 |
| NM_134223 | Vmn1r195      | 1 |
| NM_134229 | Vmn1r67       | 1 |
| NM_139139 | Dnajc17       | 1 |
| NM_139142 | Slc6a20a      | 1 |
| NM_144541 | Bre           | 1 |
| NM_144543 | Thyn1         | 1 |
| NM_144824 | Wrap53        | 1 |
| NM_144898 | Mstol         | 1 |
| NM_144953 | 1700019D03Rik | 1 |
| NM_145449 | Ifi2712b      | 1 |
| NM_145588 | Kif22         | 1 |
| NM_145706 | Nup43         | 1 |
| NM_145712 | Mtnr1b        | 1 |
| NM_145746 | Odf4          | 1 |
| NM_145834 | I117c         | 1 |
| NM_146149 | Fam151a       | 1 |
| NM_146186 | Wdr62         | 1 |

|           |               |   |
|-----------|---------------|---|
| NM_146232 | BC014805      | 1 |
| NM_146248 | Ccher1        | 1 |
| NM_146266 | 0lfr772       | 1 |
| NM_146283 | 0lfr1366      | 1 |
| NM_146290 | 0lfr125       | 1 |
| NM_146294 | 0lfr1167      | 1 |
| NM_146297 | 0lfr1115      | 1 |
| NM_146305 | 0lfr420       | 1 |
| NM_146412 | 0lfr464       | 1 |
| NM_146470 | 0lfr1392      | 1 |
| NM_146472 | 0lfr1384      | 1 |
| NM_146641 | 0lfr1164      | 1 |
| NM_146642 | 0lfr1140      | 1 |
| NM_146711 | 0lfr43        | 1 |
| NM_146714 | 0lfr248       | 1 |
| NM_146755 | 0lfr551       | 1 |
| NM_146802 | 0lfr902       | 1 |
| NM_146883 | 0lfr876       | 1 |
| NM_146891 | 0lfr1225      | 1 |
| NM_146966 | 0lfr1247      | 1 |
| NM_146968 | 0lfr1242      | 1 |
| NM_146985 | 0lfr1270      | 1 |
| NM_146989 | 0lfr1496      | 1 |
| NM_146999 | 0lfr181       | 1 |
| NM_147000 | 0lfr173       | 1 |
| NM_147041 | 0lfr57        | 1 |
| NM_147062 | 0lfr124       | 1 |
| NM_147074 | 0lfr653       | 1 |
| NM_147104 | 0lfr550       | 1 |
| NM_147122 | 0lfr623       | 1 |
| NM_148951 | Gipc3         | 1 |
| NM_148958 | Osbpl10       | 1 |
| NM_153071 | Gprc6a        | 1 |
| NM_153074 | Lrrc25        | 1 |
| NM_153077 | I11f10        | 1 |
| NM_153107 | Cpz           | 1 |
| NM_153108 | Defb8         | 1 |
| NM_153288 | Npb           | 1 |
| NM_153396 | Mical3        | 1 |
| NM_172086 | Rpl32         | 1 |
| NM_172274 | Cc2d2a        | 1 |
| NM_172304 | Tex10         | 1 |
| NM_172381 | AI314180      | 1 |
| NM_172722 | Naa25         | 1 |
| NM_172750 | Adprh11       | 1 |
| NM_172774 | Atrip         | 1 |
| NM_172802 | Fscn2         | 1 |
| NM_172879 | 4932412H11Rik | 1 |
| NM_172885 | Tmem132d      | 1 |
| NM_172901 | 4933405020Rik | 1 |
| NM_172908 | Ovch2         | 1 |
| NM_172911 | D8Ert82e      | 1 |
| NM_172914 | Ccdc113       | 1 |
| NM_173367 | Cypt3         | 1 |

|           |               |   |
|-----------|---------------|---|
| NM_173435 | 4930595M18Rik | 1 |
| NM_173742 | Rnasek        | 1 |
| NM_173765 | Aasdh         | 1 |
| NM_173869 | Stfa211       | 1 |
| NM_175008 | 4930474N05Rik | 1 |
| NM_175030 | Tctex1d4      | 1 |
| NM_175138 | Dnaic1        | 1 |
| NM_175333 | Slc25a41      | 1 |
| NM_175368 | 4933402P03Rik | 1 |
| NM_175440 | Prss27        | 1 |
| NM_175449 | Fam26f        | 1 |
| NM_175478 | Lrfn3         | 1 |
| NM_175529 | Leng9         | 1 |
| NM_175682 | 9930021D14Rik | 1 |
| NM_176785 | Hps6          | 1 |
| NM_177069 | Fbxw21        | 1 |
| NM_177683 | Vgl14         | 1 |
| NM_177788 | Exoc31        | 1 |
| NM_177840 | Lcn6          | 1 |
| NM_177841 | 4932418E24Rik | 1 |
| NM_178249 | Pram16        | 1 |
| NM_178260 | Kiss1         | 1 |
| NM_178388 | Tmem202       | 1 |
| NM_178931 | Tnfrsf14      | 1 |
| NM_183000 | Accn3         | 1 |
| NM_183097 | 1700067K01Rik | 1 |
| NM_183113 | 4932414N04Rik | 1 |
| NM_183171 | Fez1          | 1 |
| NM_183278 | Fam25c        | 1 |
| NM_183307 | Ccdc63        | 1 |
| NM_194346 | Rnf31         | 1 |
| NM_194347 | AY358078      | 1 |
| NM_198119 | Lrrc24        | 1 |
| NM_198297 | Trat1         | 1 |
| NM_198415 | Ckmt2         | 1 |
| NM_198598 | Rhox11        | 1 |
| NM_198606 | Dcaf13        | 1 |
| NM_198958 | Nox3          | 1 |
| NM_199157 | Ifnk          | 1 |
| NM_201360 | Cyp2d12       | 1 |
| NM_201374 | Ccdc155       | 1 |
| NM_203660 | Gm5136        | 1 |
| NM_205823 | Tlr12         | 1 |
| NM_207142 | Olfr1036      | 1 |
| NM_207276 | Defb21        | 1 |
| NM_207523 | Rpl23a        | 1 |
| NM_207527 | 4930504013Rik | 1 |
| NM_207539 | Mrgprb8       | 1 |
| NM_207555 | Olfr372       | 1 |
| NR_000002 | Snord32a      | 1 |
| NR_000003 | Snord35a      | 1 |
| NR_002172 | Snord15a      | 1 |
| NR_002455 | Snord34       | 1 |
| NR_002865 | Rnul1         | 1 |

|           |          |   |
|-----------|----------|---|
| NR_004410 | Snord87  | 1 |
| NR_004418 | Rnu73b   | 1 |
| NR_028281 | Snord43  | 1 |
| NR_028523 | Snord19  | 1 |
| NR_028525 | Snord45c | 1 |
| NR_028527 | Snord52  | 1 |
| NR_028535 | Snord90  | 1 |
| NR_028545 | Scarna8  | 1 |
| NR_028546 | Snora7a  | 1 |
| NR_028568 | Scarna9  | 1 |
| NR_028571 | Snora17  | 1 |
| NR_028572 | Snora43  | 1 |
| NR_029554 | Mir141   | 1 |
| NR_029557 | Mir145   | 1 |
| NR_029569 | Mir182   | 1 |
| NR_029571 | Mir185   | 1 |
| NR_029576 | Mir190   | 1 |
| NR_029601 | Mir143   | 1 |
| NR_029647 | Mir297-1 | 1 |
| NR_029658 | Mir106b  | 1 |
| NR_029659 | Mir130b  | 1 |
| NR_029724 | Mir208a  | 1 |
| NR_029733 | Mir15a   | 1 |
| NR_029764 | Mir331   | 1 |
| NR_029776 | Mir351   | 1 |
| NR_029787 | Mir25    | 1 |
| NR_029821 | Mir181c  | 1 |
| NR_029838 | Mir219-2 | 1 |
| NR_029851 | Mir362   | 1 |
| NR_029853 | Mir363   | 1 |
| NR_029884 | Mir383   | 1 |
| NR_029910 | Mir384   | 1 |
| NR_029974 | Mir452   | 1 |
| NR_030147 | Mir463   | 1 |
| NR_030151 | Mir468   | 1 |
| NR_030251 | Mir483   | 1 |
| NR_030264 | Mir542   | 1 |
| NR_030265 | Mir547   | 1 |
| NR_030273 | Mir20b   | 1 |
| NR_030275 | Mir503   | 1 |
| NR_030418 | Mir374   | 1 |
| NR_030420 | Mir592   | 1 |
| NR_030434 | Mir763   | 1 |
| NR_030453 | Mir683-1 | 1 |
| NR_030460 | Mir688   | 1 |
| NR_030481 | Mir700   | 1 |
| NR_030484 | Mir703   | 1 |
| NR_030530 | Mir741   | 1 |
| NR_030535 | Mir743b  | 1 |
| NR_030546 | Mir105   | 1 |
| NR_030608 | Mir877   | 1 |
| NR_030647 | Mir683-2 | 1 |
| NR_030704 | Snord55  | 1 |
| NR_034042 | Snora5c  | 1 |

|              |           |   |
|--------------|-----------|---|
| NR_034047    | Snora19   | 1 |
| NR_034052    | Snora2b   | 1 |
| NR_035431    | Mir1199   | 1 |
| NR_035432    | Mir1902   | 1 |
| NR_035435    | Mir1895   | 1 |
| NR_035438    | Mir1900   | 1 |
| NR_035440    | Mir1906-1 | 1 |
| NR_035459    | Mir1938   | 1 |
| NR_035464    | Mir1943   | 1 |
| NR_035467    | Mir1306   | 1 |
| NR_035468    | Mir1946a  | 1 |
| NR_035502    | Mir1981   | 1 |
| NR_037207    | Mir1843   | 1 |
| NR_037209    | Mir344d-3 | 1 |
| NR_037214    | Mir3106   | 1 |
| NR_037215    | Mir344d-1 | 1 |
| NR_037216    | Mir344d-2 | 1 |
| NR_037217    | Mir2861   | 1 |
| NR_037224    | Mir3064   | 1 |
| NR_037247    | Mir3086   | 1 |
| NR_037278    | Mir3095   | 1 |
| NR_037286    | Mir344c   | 1 |
| NR_037288    | Mir344f   | 1 |
| NR_037290    | Mir3103   | 1 |
| NR_037313    | Mir1906-2 | 1 |
| NR_037681    | Snord100  | 1 |
| NR_037683    | Snord42b  | 1 |
| NM_001001451 | Tas2r138  | 0 |
| NM_001001452 | Tas2r143  | 0 |
| NM_001001453 | Tas2r144  | 0 |
| NM_001001559 | Dub2a     | 0 |
| NM_001001650 | Prss48    | 0 |
| NM_001001803 | Spink7    | 0 |
| NM_001001805 | Olfr576   | 0 |
| NM_001001807 | Olfr279   | 0 |
| NM_001001808 | Olfr221   | 0 |
| NM_001001809 | Olfr218   | 0 |
| NM_001001810 | Olfr1206  | 0 |
| NM_001002239 | Rpl17     | 0 |
| NM_001002842 | Pram1     | 0 |
| NM_001002898 | Sirpbla   | 0 |
| NM_001003405 | Try5      | 0 |
| NM_001003664 | Gm5409    | 0 |
| NM_001003667 | Krt77     | 0 |
| NM_001003670 | Gm5414    | 0 |
| NM_001003947 | Cyp4x1    | 0 |
| NM_001004061 | Fam170a   | 0 |
| NM_001004156 | Plekhg5   | 0 |
| NM_001004192 | BC048562  | 0 |
| NM_001004366 | Scube3    | 0 |
| NM_001005225 | Olfr1197  | 0 |
| NM_001005227 | Olfr1200  | 0 |
| NM_001005230 | Olfr1024  | 0 |
| NM_001005342 | Ypel4     | 0 |



|              |               |   |
|--------------|---------------|---|
| NM_001005481 | 0lfr132       | 0 |
| NM_001005488 | 0lfr467       | 0 |
| NM_001005520 | 0lfr231       | 0 |
| NM_001005524 | 0lfr194       | 0 |
| NM_001005568 | 0lfr1281      | 0 |
| NM_001005569 | 0lfr366       | 0 |
| NM_001005570 | 0lfr707       | 0 |
| NM_001007266 | Taar2         | 0 |
| NM_001007460 | Zdhhc23       | 0 |
| NM_001007461 | Gsdma3        | 0 |
| NM_001007463 | Spag8         | 0 |
| NM_001008429 | Taar3         | 0 |
| NM_001008499 | Taar4         | 0 |
| NM_001008547 | 1700001J03Rik | 0 |
| NM_001008706 | Calm5         | 0 |
| NM_001009545 | Adam6b        | 0 |
| NM_001009546 | Naalad11      | 0 |
| NM_001009547 | Adam26b       | 0 |
| NM_001009574 | Taar5         | 0 |
| NM_001010827 | Taar7b        | 0 |
| NM_001010828 | Taar6         | 0 |
| NM_001010829 | Taar7a        | 0 |
| NM_001010830 | Taar8a        | 0 |
| NM_001010831 | Taar9         | 0 |
| NM_001010835 | Taar7e        | 0 |
| NM_001010837 | Taar8b        | 0 |
| NM_001010838 | Taar7d        | 0 |
| NM_001010839 | Taar7f        | 0 |
| NM_001010840 | Taar8c        | 0 |
| NM_001011517 | 0lfr1193      | 0 |
| NM_001011518 | 0lfr94        | 0 |
| NM_001011519 | 0lfr1148      | 0 |
| NM_001011520 | 0lfr310       | 0 |
| NM_001011523 | 0lfr913       | 0 |
| NM_001011524 | 0lfr1418      | 0 |
| NM_001011525 | 0lfr1415      | 0 |
| NM_001011527 | 0lfr503       | 0 |
| NM_001011529 | 0lfr1251      | 0 |
| NM_001011530 | 0lfr723       | 0 |
| NM_001011533 | 0lfr688       | 0 |
| NM_001011534 | 0lfr988       | 0 |
| NM_001011535 | 0lfr1182      | 0 |
| NM_001011536 | 0lfr566       | 0 |
| NM_001011542 | 0lfr1532-ps1  | 0 |
| NM_001011662 | 0lfr180       | 0 |
| NM_001011695 | 0lfr1000      | 0 |
| NM_001011734 | 0lfr1116-ps   | 0 |
| NM_001011735 | 0lfr1066      | 0 |
| NM_001011736 | 0lfr205       | 0 |
| NM_001011737 | 0lfr1357      | 0 |
| NM_001011738 | 0lfr744       | 0 |
| NM_001011739 | 0lfr885       | 0 |
| NM_001011740 | 0lfr225       | 0 |
| NM_001011742 | 0lfr479       | 0 |

|              |          |   |
|--------------|----------|---|
| NM_001011744 | 0lfr105  | 0 |
| NM_001011748 | 0lfr867  | 0 |
| NM_001011749 | 0lfr704  | 0 |
| NM_001011750 | 0lfr294  | 0 |
| NM_001011751 | 0lfr298  | 0 |
| NM_001011752 | 0lfr293  | 0 |
| NM_001011754 | 0lfr735  | 0 |
| NM_001011755 | 0lfr671  | 0 |
| NM_001011756 | 0lfr948  | 0 |
| NM_001011757 | 0lfr663  | 0 |
| NM_001011758 | 0lfr1016 | 0 |
| NM_001011759 | 0lfr1031 | 0 |
| NM_001011760 | 0lfr314  | 0 |
| NM_001011761 | 0lfr1229 | 0 |
| NM_001011764 | 0lfr106  | 0 |
| NM_001011767 | 0lfr299  | 0 |
| NM_001011769 | 0lfr317  | 0 |
| NM_001011770 | 0lfr332  | 0 |
| NM_001011771 | 0lfr1089 | 0 |
| NM_001011773 | 0lfr1287 | 0 |
| NM_001011774 | 0lfr1028 | 0 |
| NM_001011775 | 0lfr1419 | 0 |
| NM_001011776 | 0lfr527  | 0 |
| NM_001011778 | 0lfr285  | 0 |
| NM_001011779 | 0lfr286  | 0 |
| NM_001011783 | 0lfr104  | 0 |
| NM_001011784 | 0lfr1039 | 0 |
| NM_001011785 | 0lfr987  | 0 |
| NM_001011787 | 0lfr1307 | 0 |
| NM_001011789 | 0lfr222  | 0 |
| NM_001011790 | 0lfr1382 | 0 |
| NM_001011791 | 0lfr193  | 0 |
| NM_001011792 | 0lfr207  | 0 |
| NM_001011793 | 0lfr598  | 0 |
| NM_001011794 | 0lfr1322 | 0 |
| NM_001011795 | 0lfr1275 | 0 |
| NM_001011796 | 0lfr1249 | 0 |
| NM_001011797 | 0lfr782  | 0 |
| NM_001011798 | 0lfr884  | 0 |
| NM_001011799 | 0lfr453  | 0 |
| NM_001011801 | 0lfr213  | 0 |
| NM_001011803 | 0lfr1306 | 0 |
| NM_001011804 | 0lfr1211 | 0 |
| NM_001011805 | 0lfr1385 | 0 |
| NM_001011806 | 0lfr901  | 0 |
| NM_001011807 | 0lfr191  | 0 |
| NM_001011808 | 0lfr198  | 0 |
| NM_001011809 | 0lfr728  | 0 |
| NM_001011810 | 0lfr485  | 0 |
| NM_001011811 | 0lfr487  | 0 |
| NM_001011812 | 0lfr951  | 0 |
| NM_001011813 | 0lfr93   | 0 |
| NM_001011814 | 0lfr524  | 0 |
| NM_001011815 | 0lfr533  | 0 |

|              |            |   |
|--------------|------------|---|
| NM_001011816 | 0lfr1181   | 0 |
| NM_001011818 | 0lfr316    | 0 |
| NM_001011819 | 0lfr312    | 0 |
| NM_001011820 | 0lfr1359   | 0 |
| NM_001011821 | 0lfr804    | 0 |
| NM_001011822 | 0lfr787    | 0 |
| NM_001011823 | 0lfr834    | 0 |
| NM_001011824 | 0lfr832    | 0 |
| NM_001011825 | 0lfr1105   | 0 |
| NM_001011826 | 0lfr967    | 0 |
| NM_001011827 | 0lfr963    | 0 |
| NM_001011828 | 0lfr304    | 0 |
| NM_001011829 | 0lfr761    | 0 |
| NM_001011830 | 0lfr119    | 0 |
| NM_001011831 | 0lfr1500   | 0 |
| NM_001011832 | 0lfr1490   | 0 |
| NM_001011833 | 0lfr1137   | 0 |
| NM_001011834 | 0lfr1152   | 0 |
| NM_001011835 | 0lfr1162   | 0 |
| NM_001011836 | 0lfr1129   | 0 |
| NM_001011837 | 0lfr748    | 0 |
| NM_001011839 | 0lfr1437   | 0 |
| NM_001011840 | 0lfr1463   | 0 |
| NM_001011841 | 0lfr1465   | 0 |
| NM_001011842 | 0lfr1474   | 0 |
| NM_001011845 | 0lfr597    | 0 |
| NM_001011846 | 0lfr517    | 0 |
| NM_001011847 | 0lfr591    | 0 |
| NM_001011848 | 0lfr675    | 0 |
| NM_001011849 | 0lfr792    | 0 |
| NM_001011850 | 0lfr1505   | 0 |
| NM_001011851 | 0lfr412    | 0 |
| NM_001011853 | 0lfr1425   | 0 |
| NM_001011855 | 0lfr169    | 0 |
| NM_001011856 | 0lfr1331   | 0 |
| NM_001011857 | 0lfr685    | 0 |
| NM_001011858 | 0lfr504    | 0 |
| NM_001011859 | 0lfr965    | 0 |
| NM_001011860 | 0lfr1222   | 0 |
| NM_001011861 | 0lfr331    | 0 |
| NM_001011862 | 0lfr699    | 0 |
| NM_001011863 | 0lfr406-ps | 0 |
| NM_001011864 | 0lfr917    | 0 |
| NM_001011865 | 0lfr624    | 0 |
| NM_001011866 | 0lfr309    | 0 |
| NM_001011867 | 0lfr538    | 0 |
| NM_001011868 | 0lfr1178   | 0 |
| NM_001011869 | 0lfr452    | 0 |
| NM_001011870 | 0lfr1329   | 0 |
| NM_001011871 | 0lfr506    | 0 |
| NM_001011875 | Rnase12    | 0 |
| NM_001012236 | Trex1      | 0 |
| NM_001012265 | 0lfr857    | 0 |
| NM_001012266 | 0lfr835    | 0 |

|              |               |   |
|--------------|---------------|---|
| NM_001012269 | Olfrl513      | 0 |
| NM_001012307 | Defa23        | 0 |
| NM_001012402 | Hs3st6        | 0 |
| NM_001012623 | Rims1         | 0 |
| NM_001012766 | Ear12         | 0 |
| NM_001013013 | Dhrs7c        | 0 |
| NM_001013376 | Rpp38         | 0 |
| NM_001013412 | Cc126         | 0 |
| NM_001013607 | Vmo1          | 0 |
| NM_001013787 | Vmnlr209      | 0 |
| NM_001013814 | Amt           | 0 |
| NM_001013832 | Gpr31c        | 0 |
| NM_001014836 | 4930404N11Rik | 0 |
| NM_001014997 | Gm156         | 0 |
| NM_001017422 | Ear4          | 0 |
| NM_001018013 | Izumol        | 0 |
| NM_001024138 | Gpr139        | 0 |
| NM_001024225 | Defa24        | 0 |
| NM_001024614 | 1700007G11Rik | 0 |
| NM_001024673 | I128a         | 0 |
| NM_001024702 | C1ql4         | 0 |
| NM_001024727 | Gm16387       | 0 |
| NM_001024842 | Hoxc11        | 0 |
| NM_001024850 | Rhox10        | 0 |
| NM_001025086 | Rhox7         | 0 |
| NM_001025208 | LOC547349     | 0 |
| NM_001025240 | Gm5346        | 0 |
| NM_001025351 | Defb46        | 0 |
| NM_001025380 | Adam39        | 0 |
| NM_001025385 | Tas2r137      | 0 |
| NM_001025386 | Olfrl243      | 0 |
| NM_001025432 | Crebbp        | 0 |
| NM_001029935 | Trim38        | 0 |
| NM_001029984 | Fcrlb         | 0 |
| NM_001030289 | Mmp27         | 0 |
| NM_001030291 | Enpp7         | 0 |
| NM_001030292 | Kcnk15        | 0 |
| NM_001030294 | Olfm4         | 0 |
| NM_001030306 | Fam193a       | 0 |
| NM_001031621 | Abca17        | 0 |
| NM_001033184 | 1700057G04Rik | 0 |
| NM_001033192 | C78339        | 0 |
| NM_001033241 | Gm382         | 0 |
| NM_001033252 | Gm732         | 0 |
| NM_001033267 | Qrich2        | 0 |
| NM_001033298 | Plk1s1        | 0 |
| NM_001033303 | Ampd1         | 0 |
| NM_001033364 | Cdhr2         | 0 |
| NM_001033459 | Gm1679        | 0 |
| NM_001033461 | Lrrc43        | 0 |
| NM_001033464 | Efcab4b       | 0 |
| NM_001033491 | Gm1965        | 0 |
| NM_001033499 | Sh2d1b2       | 0 |
| NM_001033550 | Lrrc8b        | 0 |

|              |               |   |
|--------------|---------------|---|
| NM_001033775 | 4933422H20Rik | 0 |
| NM_001033865 | Rps27a        | 0 |
| NM_001033874 | Ak8           | 0 |
| NM_001033875 | Ctrc          | 0 |
| NM_001033876 | Kcnk9         | 0 |
| NM_001033878 | Vmn2r66       | 0 |
| NM_001033880 | 4930415L06Rik | 0 |
| NM_001033904 | Khdc1c        | 0 |
| NM_001034857 | C330019L16Rik | 0 |
| NM_001034864 | Gm4907        | 0 |
| NM_001034866 | Pnlc1         | 0 |
| NM_001034873 | Ksr2          | 0 |
| NM_001034877 | Gm5155        | 0 |
| NM_001034907 | Zc3h12b       | 0 |
| NM_001037321 | Fbxo40        | 0 |
| NM_001037712 | Kcnh6         | 0 |
| NM_001037718 | 4932415M13Rik | 0 |
| NM_001037743 | 4921506M07Rik | 0 |
| NM_001037747 | Card9         | 0 |
| NM_001037913 | Ccdc107       | 0 |
| NM_001037915 | Ripply1       | 0 |
| NM_001038499 | Arsi          | 0 |
| NM_001039118 | Klra33        | 0 |
| NM_001039120 | Defb26        | 0 |
| NM_001039123 | Defb18        | 0 |
| NM_001039128 | Tas2r122      | 0 |
| NM_001039146 | Vmn1r90       | 0 |
| NM_001039173 | Dok6          | 0 |
| NM_001039222 | Gm6289        | 0 |
| NM_001039475 | Slco6b1       | 0 |
| NM_001039494 | 1700019N12Rik | 0 |
| NM_001039501 | Wfdc10        | 0 |
| NM_001039518 | B020018G12Rik | 0 |
| NM_001039666 | Krt40         | 0 |
| NM_001039700 | Pkd113        | 0 |
| NM_001039720 | 9030619P08Rik | 0 |
| NM_001039941 | Cypt8         | 0 |
| NM_001039942 | Cypt9         | 0 |
| NM_001039943 | Cypt7         | 0 |
| NM_001039944 | Cypt10        | 0 |
| NM_001040027 | Gm15386       | 0 |
| NM_001040055 | Gm14316       | 0 |
| NM_001040461 | Dear1         | 0 |
| NM_001042534 | Capg          | 0 |
| NM_001042612 | Nlrp9c        | 0 |
| NM_001042711 | Amy2a5        | 0 |
| NM_001042743 | Mast2         | 0 |
| NM_001045481 | Ifi203        | 0 |
| NM_001045531 | Spata22       | 0 |
| NM_001045544 | Vmn1r204      | 0 |
| NM_001048057 | Rpl38         | 0 |
| NM_001048176 | Cerkl         | 0 |
| NM_001076679 | Gm9733        | 0 |
| NM_001077425 | Cntnap5a      | 0 |

|              |               |   |
|--------------|---------------|---|
| NM_001077684 | 4930578N16Rik | 0 |
| NM_001079933 | Defa26        | 0 |
| NM_001080708 | Fam65c        | 0 |
| NM_001080710 | Sdr16c6       | 0 |
| NM_001080711 | Dfnb59        | 0 |
| NM_001080808 | Ccdc64        | 0 |
| NM_001080810 | Zscan30       | 0 |
| NM_001080817 | Prdm10        | 0 |
| NM_001080933 | Ankfn1        | 0 |
| NM_001080943 | Zdhhc22       | 0 |
| NM_001080945 | Nanogpd       | 0 |
| NM_001080972 | Vmn1r194      | 0 |
| NM_001081005 | 1500012F01Rik | 0 |
| NM_001081008 | Taf1          | 0 |
| NM_001081010 | Olfr367-ps    | 0 |
| NM_001081024 | Setdb2        | 0 |
| NM_001081033 | Pdella        | 0 |
| NM_001081053 | Itga10        | 0 |
| NM_001081060 | Slc9a3        | 0 |
| NM_001081100 | Morn1         | 0 |
| NM_001081143 | Gnat3         | 0 |
| NM_001081159 | S100z         | 0 |
| NM_001081177 | Kif13b        | 0 |
| NM_001081189 | Uprt          | 0 |
| NM_001081200 | Crnn          | 0 |
| NM_001081212 | Irs2          | 0 |
| NM_001081215 | Ddx60         | 0 |
| NM_001081228 | Ttc30a2       | 0 |
| NM_001081240 | Prmt10        | 0 |
| NM_001081244 | BY080835      | 0 |
| NM_001081248 | Gm13177       | 0 |
| NM_001081250 | Myh13         | 0 |
| NM_001081258 | Kif14         | 0 |
| NM_001081262 | Fam194a       | 0 |
| NM_001081271 | Calhm1        | 0 |
| NM_001081272 | Ldlrad1       | 0 |
| NM_001081281 | Trim55        | 0 |
| NM_001081283 | Tmem28        | 0 |
| NM_001081284 | Gm12695       | 0 |
| NM_001081285 | Mup6          | 0 |
| NM_001081292 | Map3k10       | 0 |
| NM_001081299 | Cdh18         | 0 |
| NM_001081301 | Olfr455       | 0 |
| NM_001081307 | Ppp1r12b      | 0 |
| NM_001081317 | Anub11        | 0 |
| NM_001081318 | Gm6614        | 0 |
| NM_001081321 | Pds5a         | 0 |
| NM_001081338 | L3mbtl1       | 0 |
| NM_001081350 | No18          | 0 |
| NM_001081357 | Map4k3        | 0 |
| NM_001081361 | Mosc1         | 0 |
| NM_001081366 | Vps8          | 0 |
| NM_001081367 | Kctd17        | 0 |
| NM_001081374 | Prss36        | 0 |

|              |               |   |
|--------------|---------------|---|
| NM_001081385 | Pcdh11x       | 0 |
| NM_001081389 | Nlrp6         | 0 |
| NM_001081390 | Palld         | 0 |
| NM_001081397 | Myo16         | 0 |
| NM_001081417 | Chd7          | 0 |
| NM_001081430 | Naa30         | 0 |
| NM_001081432 | Ptprq         | 0 |
| NM_001081448 | Vmn2r84       | 0 |
| NM_001081449 | Vmn2r54       | 0 |
| NM_001081564 | Gm6592        | 0 |
| NM_001081565 | Ssxb8         | 0 |
| NM_001081652 | Nacad         | 0 |
| NM_001081653 | Cntnap5c      | 0 |
| NM_001081663 | Btnl7         | 0 |
| NM_001081665 | Ccdc129       | 0 |
| NM_001081687 | Gm5150        | 0 |
| NM_001081954 | Dux           | 0 |
| NM_001082542 | Gm5416        | 0 |
| NM_001082545 | Stfa2         | 0 |
| NM_001083311 | Vmn1r223      | 0 |
| NM_001083328 | Gtpbp5        | 0 |
| NM_001083891 | Ndufv3        | 0 |
| NM_001085390 | Dusp5         | 0 |
| NM_001085414 | Pramef6       | 0 |
| NM_001085477 | Olfr765       | 0 |
| NM_001085502 | Nt5c1a        | 0 |
| NM_001085504 | Gm436         | 0 |
| NM_001085510 | Gm4987        | 0 |
| NM_001085514 | 1700101E01Rik | 0 |
| NM_001085516 | Gm12794       | 0 |
| NM_001085517 | Gm5132        | 0 |
| NM_001085527 | Krtap9-5      | 0 |
| NM_001085528 | Gm13271       | 0 |
| NM_001085529 | Slc2a7        | 0 |
| NM_001085536 | Gm13178       | 0 |
| NM_001085539 | Gm13101       | 0 |
| NM_001085542 | Gm13124       | 0 |
| NM_001085546 | LOC664987     | 0 |
| NM_001085547 | Krtap4-8      | 0 |
| NM_001085555 | Tcp11         | 0 |
| NM_001098267 | Tt112         | 0 |
| NM_001098669 | Klrc2         | 0 |
| NM_001099275 | Tekt5         | 0 |
| NM_001099303 | Fam159a       | 0 |
| NM_001099305 | Gm6880        | 0 |
| NM_001099307 | Gm7173        | 0 |
| NM_001099311 | Gm11596       | 0 |
| NM_001099314 | Msmg          | 0 |
| NM_001099324 | Gm15217       | 0 |
| NM_001099327 | 100043387     | 0 |
| NM_001099346 | Gm11937       | 0 |
| NM_001099918 | 4930431A04Rik | 0 |
| NM_001100177 | Calcoco2      | 0 |
| NM_001100180 | Cyp3a57       | 0 |

|              |               |   |
|--------------|---------------|---|
| NM_001100183 | Cyp4a29-ps    | 0 |
| NM_001100184 | Cyp2t4        | 0 |
| NM_001100185 | Cyp4a30b-ps   | 0 |
| NM_001100466 | Skint8        | 0 |
| NM_001100608 | Gm15450       | 0 |
| NM_001100614 | Gm11564       | 0 |
| NM_001100618 | Gm16378       | 0 |
| NM_001101038 | Siglec15      | 0 |
| NM_001101442 | 9230113P08Rik | 0 |
| NM_001101445 | Cyp4f17       | 0 |
| NM_001101450 | Gm44          | 0 |
| NM_001101452 | Gm4794        | 0 |
| NM_001101464 | Foxi3         | 0 |
| NM_001101501 | Gm15104       | 0 |
| NM_001101533 | Vmn1r20       | 0 |
| NM_001101535 | Ccdc8         | 0 |
| NM_001101560 | Cldn20        | 0 |
| NM_001101562 | Vmn1r167      | 0 |
| NM_001101572 | Vmn2r82       | 0 |
| NM_001101579 | Vmn1r12       | 0 |
| NM_001101584 | Gm6813        | 0 |
| NM_001101585 | Gm6927        | 0 |
| NM_001101586 | Sult2a3       | 0 |
| NM_001101588 | Cyp4f40       | 0 |
| NM_001101606 | Gm8817        | 0 |
| NM_001101628 | Iqcf6         | 0 |
| NM_001101630 | Gm3238        | 0 |
| NM_001101644 | Gm4535        | 0 |
| NM_001101647 | Prlh          | 0 |
| NM_001101656 | Gm11710       | 0 |
| NM_001101657 | Gm11711       | 0 |
| NM_001102578 | Vmn2r75       | 0 |
| NM_001102579 | Vmn2r67       | 0 |
| NM_001102580 | Vmn2r76       | 0 |
| NM_001102581 | Vmn2r95       | 0 |
| NM_001102582 | Vmn2r18       | 0 |
| NM_001102584 | Vmn2r114      | 0 |
| NM_001102602 | Vmn2r85       | 0 |
| NM_001102662 | Skint1        | 0 |
| NM_001102665 | Gm14920       | 0 |
| NM_001103365 | Vmn2r86       | 0 |
| NM_001103366 | Vmn2r87       | 0 |
| NM_001103368 | Vmn2r80       | 0 |
| NM_001104531 | Cyp2d11       | 0 |
| NM_001104537 | Vmn2r83       | 0 |
| NM_001104539 | Vmn2r90       | 0 |
| NM_001104540 | Vmn2r91       | 0 |
| NM_001104541 | Vmn2r92       | 0 |
| NM_001104542 | Vmn2r93       | 0 |
| NM_001104543 | Vmn2r94       | 0 |
| NM_001104547 | Vmn2r96       | 0 |
| NM_001104549 | Vmn2r97       | 0 |
| NM_001104550 | Vmn2r98       | 0 |
| NM_001104551 | Vmn2r99       | 0 |



|              |          |   |
|--------------|----------|---|
| NM_001104562 | Vmn2r100 | 0 |
| NM_001104563 | Vmn2r101 | 0 |
| NM_001104564 | Vmn2r102 | 0 |
| NM_001104565 | Vmn2r103 | 0 |
| NM_001104566 | Vmn2r104 | 0 |
| NM_001104567 | Vmn2r105 | 0 |
| NM_001104568 | Vmn2r106 | 0 |
| NM_001104569 | Vmn2r107 | 0 |
| NM_001104570 | Vmn2r108 | 0 |
| NM_001104571 | Vmn2r109 | 0 |
| NM_001104572 | Vmn2r110 | 0 |
| NM_001104573 | Vmn2r111 | 0 |
| NM_001104575 | Vmn2r112 | 0 |
| NM_001104578 | Vmn2r113 | 0 |
| NM_001104579 | Vmn2r115 | 0 |
| NM_001104580 | Vmn2r116 | 0 |
| NM_001104581 | Vmn2r117 | 0 |
| NM_001104582 | Vmn2r118 | 0 |
| NM_001104591 | Vmn2r120 | 0 |
| NM_001104592 | Vmn2r2   | 0 |
| NM_001104614 | Vmn2r3   | 0 |
| NM_001104615 | Vmn2r4   | 0 |
| NM_001104618 | Vmn2r5   | 0 |
| NM_001104619 | Vmn2r6   | 0 |
| NM_001104620 | Vmn2r8   | 0 |
| NM_001104621 | Vmn2r9   | 0 |
| NM_001104622 | Vmn2r11  | 0 |
| NM_001104623 | Vmn2r12  | 0 |
| NM_001104624 | Vmn2r13  | 0 |
| NM_001104625 | Vmn2r14  | 0 |
| NM_001104626 | Vmn2r15  | 0 |
| NM_001104627 | Vmn2r16  | 0 |
| NM_001104628 | Vmn2r17  | 0 |
| NM_001104632 | Vmn2r19  | 0 |
| NM_001104634 | Vmn2r20  | 0 |
| NM_001104635 | Vmn2r21  | 0 |
| NM_001104637 | Vmn2r22  | 0 |
| NM_001104638 | Vmn2r23  | 0 |
| NM_001104639 | Vmn2r24  | 0 |
| NM_001104641 | Vmn2r25  | 0 |
| NM_001104642 | Vmn2r27  | 0 |
| NM_001104644 | Vmn2r53  | 0 |
| NM_001104645 | Vmn2r55  | 0 |
| NM_001104648 | Vmn2r56  | 0 |
| NM_001104926 | Cyp2j7   | 0 |
| NM_001104927 | Cyp2j8   | 0 |
| NM_001105055 | Vmn2r58  | 0 |
| NM_001105056 | Vmn2r59  | 0 |
| NM_001105057 | Vmn2r60  | 0 |
| NM_001105058 | Vmn2r61  | 0 |
| NM_001105059 | Vmn2r62  | 0 |
| NM_001105060 | Vmn2r63  | 0 |
| NM_001105061 | Gm9268   | 0 |
| NM_001105062 | Vmn2r31  | 0 |

|              |            |   |
|--------------|------------|---|
| NM_001105063 | Vmn2r32    | 0 |
| NM_001105065 | Vmn2r33    | 0 |
| NM_001105066 | Vmn2r34    | 0 |
| NM_001105067 | Vmn2r35    | 0 |
| NM_001105068 | Vmn2r36    | 0 |
| NM_001105070 | Vmn2r38    | 0 |
| NM_001105071 | Vmn2r39    | 0 |
| NM_001105072 | Vmn2r40    | 0 |
| NM_001105073 | Vmn2r41    | 0 |
| NM_001105074 | Vmn2r44    | 0 |
| NM_001105075 | Vmn2r45    | 0 |
| NM_001105076 | Vmn2r46    | 0 |
| NM_001105151 | Vmn2r47    | 0 |
| NM_001105152 | Vmn2r48    | 0 |
| NM_001105156 | Vmn2r49    | 0 |
| NM_001105178 | Vmn2r50    | 0 |
| NM_001105179 | Vmn2r51    | 0 |
| NM_001105180 | Vmn2r65    | 0 |
| NM_001105181 | Vmn2r68-ps | 0 |
| NM_001105182 | Vmn2r69    | 0 |
| NM_001105183 | Vmn2r70    | 0 |
| NM_001105184 | Vmn2r71    | 0 |
| NM_001105185 | Vmn2r72-ps | 0 |
| NM_001105186 | Vmn2r73    | 0 |
| NM_001105187 | Vmn2r74    | 0 |
| NM_001105188 | Vmn2r77    | 0 |
| NM_001105189 | Vmn2r78    | 0 |
| NM_001105190 | Vmn2r79    | 0 |
| NM_001105191 | Vmn2r52    | 0 |
| NM_001105201 | Cyp26c1    | 0 |
| NM_001109743 | Skor2      | 0 |
| NM_001110020 | Gm6900     | 0 |
| NM_001110505 | Amy1       | 0 |
| NM_001111116 | Gm15427    | 0 |
| NM_001111144 | Gm381      | 0 |
| NM_001111145 | Gm514      | 0 |
| NM_001111282 | Hmg111     | 0 |
| NM_001111313 | Gm9104     | 0 |
| NM_001111318 | Clbn24     | 0 |
| NM_001111330 | Gm16379    | 0 |
| NM_001112668 | Gm9790     | 0 |
| NM_001113367 | Bo11       | 0 |
| NM_001113395 | Gm16501    | 0 |
| NM_001113548 | Adamts15   | 0 |
| NM_001114529 | Gm4906     | 0 |
| NM_001114677 | Rad211     | 0 |
| NM_001114678 | Gm5072     | 0 |
| NM_001115074 | Gm101      | 0 |
| NM_001115076 | Camsap1    | 0 |
| NM_001115077 | Gm13125    | 0 |
| NM_001122635 | Cdhr4      | 0 |
| NM_001122660 | Gm10639    | 0 |
| NM_001123367 | Gm3448     | 0 |
| NM_001123368 | Gm3417     | 0 |

|              |               |   |
|--------------|---------------|---|
| NM_001126319 | Mup9          | 0 |
| NM_001126326 | Gm11756       | 0 |
| NM_001126490 | Ism1          | 0 |
| NM_001126491 | Gm14459       | 0 |
| NM_001127188 | Zfp534        | 0 |
| NM_001127355 | Eif2b4        | 0 |
| NM_001127725 | Sec1415       | 0 |
| NM_001128090 | Rerg1         | 0 |
| NM_001128093 | Siah3         | 0 |
| NM_001128198 | Vps13d        | 0 |
| NM_001128510 | Gm9513        | 0 |
| NM_001129886 | Gm10731       | 0 |
| NM_001134661 | Gm6406        | 0 |
| NM_001136091 | Tcirg1        | 0 |
| NM_001137547 | Usp51         | 0 |
| NM_001141948 | Nmi           | 0 |
| NM_001142724 | Kbtbd12       | 0 |
| NM_001143956 | Mettl11b      | 0 |
| NM_001145015 | Arhgap40      | 0 |
| NM_001145060 | Glyat13       | 0 |
| NM_001145259 | 1700018A14Rik | 0 |
| NM_001145300 | 4931440L10Rik | 0 |
| NM_001145537 | 4930544D05Rik | 0 |
| NM_001145780 | Use1          | 0 |
| NM_001145949 | Dlgap5        | 0 |
| NM_001146002 | Txndc2        | 0 |
| NM_001146012 | R3hcc1        | 0 |
| NM_001146328 | Rbm46         | 0 |
| NM_001146329 | Sbk2          | 0 |
| NM_001146330 | Gpr52         | 0 |
| NM_001146346 | Emp3          | 0 |
| NM_001146701 | Iqcf1         | 0 |
| NM_001159693 | Zar11         | 0 |
| NM_001159910 | Ccdc85c       | 0 |
| NM_001160178 | Klhdc7b       | 0 |
| NM_001160265 | Cyp2w1        | 0 |
| NM_001160403 | I11rap11      | 0 |
| NM_001160424 | Tgm7          | 0 |
| NM_001161609 | Gm13285       | 0 |
| NM_001161610 | Gm13287       | 0 |
| NM_001161802 | Zscan4e       | 0 |
| NM_001162865 | Cylc2         | 0 |
| NM_001162940 | Gm10081       | 0 |
| NM_001163014 | Gp6           | 0 |
| NM_001163105 | Krtap27-1     | 0 |
| NM_001163191 | Otud6a        | 0 |
| NM_001163195 | Gm14692       | 0 |
| NM_001163223 | Zfp804b       | 0 |
| NM_001163268 | Lpar5         | 0 |
| NM_001163353 | Gm12171       | 0 |
| NM_001163416 | Ptx4          | 0 |
| NM_001163483 | 1700020A23Rik | 0 |
| NM_001163498 | Rundc2a       | 0 |
| NM_001163533 | Rtdr1         | 0 |

|              |             |   |
|--------------|-------------|---|
| NM_001163626 | Noxa1       | 0 |
| NM_001163731 | Gm10697     | 0 |
| NM_001163770 | Dom3z       | 0 |
| NM_001164046 | Gm13306     | 0 |
| NM_001164117 | Serpinb6a   | 0 |
| NM_001164156 | Mcrs1       | 0 |
| NM_001164306 | Gm4846      | 0 |
| NM_001164370 | Mipol1      | 0 |
| NM_001164614 | Ccdc159     | 0 |
| NM_001164704 | Renbp       | 0 |
| NM_001164813 | Pet117      | 0 |
| NM_001165944 | O1fr819     | 0 |
| NM_001165950 | Gm10267     | 0 |
| NM_001165957 | Txndc6      | 0 |
| NM_001165971 | Gm5803      | 0 |
| NM_001166063 | Ccdc152     | 0 |
| NM_001166282 | Ccdc33      | 0 |
| NM_001166581 | BC005561    | 0 |
| NM_001166634 | Gm4302      | 0 |
| NM_001166636 | Gm4312      | 0 |
| NM_001166637 | Gm4301      | 0 |
| NM_001166638 | Gm4303      | 0 |
| NM_001166639 | Gm4305      | 0 |
| NM_001166641 | Gm4307      | 0 |
| NM_001166651 | Klh133      | 0 |
| NM_001166706 | Vmn1r55     | 0 |
| NM_001166707 | Vmn1r123    | 0 |
| NM_001166708 | Vmn1r119    | 0 |
| NM_001166709 | Vmn1r207-ps | 0 |
| NM_001166710 | Vmn1r7      | 0 |
| NM_001166711 | Gm5725      | 0 |
| NM_001166712 | Vmn1r151    | 0 |
| NM_001166713 | Gm5728      | 0 |
| NM_001166714 | Vmn1r122    | 0 |
| NM_001166715 | Vmn1r120    | 0 |
| NM_001166716 | Vmn1r113    | 0 |
| NM_001166718 | Vmn1r173    | 0 |
| NM_001166719 | Vmn1r34     | 0 |
| NM_001166720 | Vmn1r39     | 0 |
| NM_001166721 | Vmn1r176    | 0 |
| NM_001166722 | Vmn1r170    | 0 |
| NM_001166723 | Vmn1r94     | 0 |
| NM_001166724 | Vmn1r160    | 0 |
| NM_001166725 | Vmn1r129    | 0 |
| NM_001166726 | Vmn1r127    | 0 |
| NM_001166727 | Vmn1r175    | 0 |
| NM_001166728 | Vmn1r1      | 0 |
| NM_001166729 | Vmn1r31     | 0 |
| NM_001166731 | Vmn1r77     | 0 |
| NM_001166732 | Vmn1r60     | 0 |
| NM_001166733 | Vmn1r61     | 0 |
| NM_001166734 | Vmn1r57     | 0 |
| NM_001166735 | Vmn1r224    | 0 |
| NM_001166736 | Vmn1r91     | 0 |

|              |          |   |
|--------------|----------|---|
| NM_001166737 | Vmnlr103 | 0 |
| NM_001166738 | Vmnlr104 | 0 |
| NM_001166739 | Vmnlr128 | 0 |
| NM_001166740 | Vmnlr125 | 0 |
| NM_001166741 | Vmnlr121 | 0 |
| NM_001166742 | Vmnlr118 | 0 |
| NM_001166743 | Vmnlr117 | 0 |
| NM_001166744 | Vmnlr116 | 0 |
| NM_001166745 | Vmnlr115 | 0 |
| NM_001166746 | Vmnlr111 | 0 |
| NM_001166747 | Vmnlr135 | 0 |
| NM_001166748 | Vmnlr139 | 0 |
| NM_001166749 | Vmnlr142 | 0 |
| NM_001166750 | Vmnlr143 | 0 |
| NM_001166751 | Gm8660   | 0 |
| NM_001166752 | Vmnlr152 | 0 |
| NM_001166753 | Vmnlr155 | 0 |
| NM_001166754 | Vmnlr157 | 0 |
| NM_001166755 | Vmnlr163 | 0 |
| NM_001166756 | Gm8720   | 0 |
| NM_001166757 | Vmnlr124 | 0 |
| NM_001166758 | Vmnlr159 | 0 |
| NM_001166759 | Vmnlr107 | 0 |
| NM_001166835 | Vmnlr79  | 0 |
| NM_001166836 | Vmnlr101 | 0 |
| NM_001166837 | Vmnlr114 | 0 |
| NM_001166838 | Vmnlr126 | 0 |
| NM_001166839 | Gm4172   | 0 |
| NM_001166840 | Vmnlr149 | 0 |
| NM_001166841 | Vmnlr158 | 0 |
| NM_001166842 | Vmnlr168 | 0 |
| NM_001166843 | Vmnlr169 | 0 |
| NM_001166844 | Vmnlr100 | 0 |
| NM_001166845 | Vmnlr109 | 0 |
| NM_001166846 | Vmnlr110 | 0 |
| NM_001166847 | Vmnlr112 | 0 |
| NM_001166848 | Vmnlr130 | 0 |
| NM_001166849 | Vmnlr137 | 0 |
| NM_001166850 | Vmnlr165 | 0 |
| NM_001167146 | Gm5726   | 0 |
| NM_001167147 | Gm8677   | 0 |
| NM_001167148 | Gm16442  | 0 |
| NM_001167149 | Gm16451  | 0 |
| NM_001167150 | Gm8453   | 0 |
| NM_001167151 | Gm4498   | 0 |
| NM_001167153 | Gm6164   | 0 |
| NM_001167154 | Gm8693   | 0 |
| NM_001167155 | Gm4144   | 0 |
| NM_001167158 | Gm4133   | 0 |
| NM_001167159 | Gm4187   | 0 |
| NM_001167160 | Gm10665  | 0 |
| NM_001167161 | Gm10670  | 0 |
| NM_001167162 | Gm4201   | 0 |
| NM_001167163 | Gm4141   | 0 |

|              |               |   |
|--------------|---------------|---|
| NM_001167164 | Gm4214        | 0 |
| NM_001167165 | Gm4175        | 0 |
| NM_001167166 | Gm4216        | 0 |
| NM_001167167 | Gm4177        | 0 |
| NM_001167168 | Gm4220        | 0 |
| NM_001167169 | Gm4179        | 0 |
| NM_001167534 | Vmnlr2        | 0 |
| NM_001167535 | Vmnlr3        | 0 |
| NM_001167536 | Vmnlr86       | 0 |
| NM_001167537 | Vmnlr88       | 0 |
| NM_001167538 | Vmnlr95       | 0 |
| NM_001167539 | Vmnlr238      | 0 |
| NM_001167540 | Vmnlr184      | 0 |
| NM_001167541 | Vmnlr196      | 0 |
| NM_001167542 | Vmnlr221      | 0 |
| NM_001167567 | Vmnlr186      | 0 |
| NM_001167568 | Vmnlr187      | 0 |
| NM_001167573 | Gm10666       | 0 |
| NM_001167581 | Gsdmc11       | 0 |
| NM_001167584 | Pate-g        | 0 |
| NM_001167588 | Pate-n        | 0 |
| NM_001167603 | Gm6762        | 0 |
| NM_001167622 | Gm3867        | 0 |
| NM_001167790 | Defal7        | 0 |
| NM_001167876 | Skint5        | 0 |
| NM_001170345 | Gm2058        | 0 |
| NM_001170705 | Dthd1         | 0 |
| NM_001170955 | Gm15299       | 0 |
| NM_001170979 | Gm6222        | 0 |
| NM_001171640 | 1700007I08Rik | 0 |
| NM_001172072 | Vmnlr68       | 0 |
| NM_001172686 | O1fr376       | 0 |
| NM_001177348 | Gm3646        | 0 |
| NM_001177351 | AW112010      | 0 |
| NM_001177356 | Gm3852        | 0 |
| NM_001177364 | Heatr7b1      | 0 |
| NM_001177377 | Gm6760        | 0 |
| NM_001177389 | 4933403008Rik | 0 |
| NM_001177390 | Gm6985        | 0 |
| NM_001177391 | Gm6788        | 0 |
| NM_001177392 | Gm13547       | 0 |
| NM_001177394 | Gm13476       | 0 |
| NM_001177418 | Gm13698       | 0 |
| NM_001177422 | Gm13693       | 0 |
| NM_001177424 | Gm13696       | 0 |
| NM_001177429 | Gm13694       | 0 |
| NM_001177430 | Gm13697       | 0 |
| NM_001177432 | Gm13691       | 0 |
| NM_001177434 | Gm13695       | 0 |
| NM_001177439 | Gm1332        | 0 |
| NM_001177467 | Gm7030        | 0 |
| NM_001177485 | Gm15284       | 0 |
| NM_001177486 | Gm15293       | 0 |
| NM_001177487 | Gm15292       | 0 |

|              |               |   |
|--------------|---------------|---|
| NM_001177505 | Zfp167        | 0 |
| NM_001177508 | Olfr743       | 0 |
| NM_001177509 | Gm1110        | 0 |
| NM_001177511 | Npffr1        | 0 |
| NM_001177521 | Gm15308       | 0 |
| NM_001177523 | Gm6696        | 0 |
| NM_001177526 | Gm7861        | 0 |
| NM_001177529 | Gm5494        | 0 |
| NM_001177533 | Apol11a       | 0 |
| NM_001177536 | Prdm11        | 0 |
| NM_001177550 | Zfp442        | 0 |
| NM_001177566 | Mrgpra9       | 0 |
| NM_001177567 | Otogl         | 0 |
| NM_001177569 | Gm6026        | 0 |
| NM_001177571 | Ccdc162       | 0 |
| NM_001177583 | Esp4          | 0 |
| NM_001177588 | Gm8882        | 0 |
| NM_001177832 | Gm10324       | 0 |
| NM_001177857 | Olfr1053      | 0 |
| NM_001178039 | Gm10136       | 0 |
| NM_001184964 | Rhox3b        | 0 |
| NM_001184969 | Rhox3e        | 0 |
| NM_001184981 | Sult2a7       | 0 |
| NM_001185083 | Ins2          | 0 |
| NM_001185162 | Wdr53         | 0 |
| NM_001185182 | H2-Ke2        | 0 |
| NM_001190310 | Clec4b1       | 0 |
| NM_001190322 | Chchd7        | 0 |
| NM_001190333 | Ccr6          | 0 |
| NM_001190356 | Gm4832        | 0 |
| NM_001190381 | Olfr596       | 0 |
| NM_001190403 | Amy2b         | 0 |
| NM_001190437 | Abhd11        | 0 |
| NM_001190732 | Mtrnr21       | 0 |
| NM_001193631 | Prss51        | 0 |
| NM_001195033 | Abhd12b       | 0 |
| NM_001195034 | Acpt          | 0 |
| NM_001195036 | Ect21         | 0 |
| NM_001195074 | Kenmb3        | 0 |
| NM_001195094 | Ccdc42b       | 0 |
| NM_001195128 | Gm5294        | 0 |
| NM_001195229 | Nek10         | 0 |
| NM_001195255 | Gm581         | 0 |
| NM_001195531 | Gm5741        | 0 |
| NM_001195544 | Gm12          | 0 |
| NM_001195672 | Gm221         | 0 |
| NM_001195687 | Gm4975        | 0 |
| NM_001195693 | Plscr5        | 0 |
| NM_001195710 | Tmem95        | 0 |
| NM_001195717 | Gm12034       | 0 |
| NM_001195730 | Dcdc2b        | 0 |
| NM_001195760 | S100a2        | 0 |
| NM_001195765 | Gm13611       | 0 |
| NM_001198597 | 9430070013Rik | 0 |

|              |               |   |
|--------------|---------------|---|
| NM_001199224 | Agbl1         | 0 |
| NM_001199307 | Gm14435       | 0 |
| NM_001199311 | Gm7157        | 0 |
| NM_001199350 | Rpl34-ps1     | 0 |
| NM_001199736 | Gm9524        | 0 |
| NM_001199956 | Gm9839        | 0 |
| NM_001199959 | Cc127b        | 0 |
| NM_001199964 | Gm2506        | 0 |
| NM_001200027 | Olfr612       | 0 |
| NM_001201322 | 4930415020Rik | 0 |
| NM_001204908 | Zfp648        | 0 |
| NM_001204913 | LOC100504323  | 0 |
| NM_001204917 | Gm8394        | 0 |
| NM_001204920 | Gm5780        | 0 |
| NM_001204921 | Gm4799        | 0 |
| NM_001204983 | Gm9766        | 0 |
| NM_001205009 | Gm2696        | 0 |
| NM_001205011 | LOC100504232  | 0 |
| NM_001205032 | LOC100502831  | 0 |
| NM_001205033 | LOC100502953  | 0 |
| NM_001205034 | LOC100503388  | 0 |
| NM_001205035 | LOC100502921  | 0 |
| NM_001205036 | LOC100504608  | 0 |
| NM_001205101 | Gm13212       | 0 |
| NM_001205102 | Lrit3         | 0 |
| NM_001205108 | Ssxb6         | 0 |
| NM_001205242 | A430107P09Rik | 0 |
| NM_001205249 | Gm9994        | 0 |
| NM_001205282 | Gm14496       | 0 |
| NM_001205306 | Gm3383        | 0 |
| NM_007427    | Agrp          | 0 |
| NM_007432    | Akp3          | 0 |
| NM_007445    | Amh           | 0 |
| NM_007449    | Ang2          | 0 |
| NM_007507    | Atp5k         | 0 |
| NM_007637    | Cct5          | 0 |
| NM_007708    | Cit           | 0 |
| NM_007713    | Clk3          | 0 |
| NM_007720    | Ccr8          | 0 |
| NM_007730    | Col12a1       | 0 |
| NM_007751    | Cox8b         | 0 |
| NM_007773    | Crybb2        | 0 |
| NM_007800    | Ctsg          | 0 |
| NM_007827    | Daf2          | 0 |
| NM_007848    | Defa-rs7      | 0 |
| NM_007849    | Defa25        | 0 |
| NM_007850    | Defa3         | 0 |
| NM_007852    | Defa6         | 0 |
| NM_007877    | Drd3          | 0 |
| NM_007919    | Cela2a        | 0 |
| NM_007959    | Etv2          | 0 |
| NM_008006    | Fgf2          | 0 |
| NM_008023    | Foxb2         | 0 |
| NM_008040    | Fpr-rs3       | 0 |



|           |         |   |
|-----------|---------|---|
| NM_008041 | Fpr-rs4 | 0 |
| NM_008049 | Ft12    | 0 |
| NM_008117 | Gh      | 0 |
| NM_008158 | Gpr27   | 0 |
| NM_008167 | Grid2   | 0 |
| NM_008182 | Gsta2   | 0 |
| NM_008196 | Gzmk    | 0 |
| NM_008199 | H2-B1   | 0 |
| NM_008205 | H2-M9   | 0 |
| NM_008262 | Onecut1 | 0 |
| NM_008264 | Hoxa13  | 0 |
| NM_008333 | Ifna11  | 0 |
| NM_008334 | Ifna7   | 0 |
| NM_008336 | Ifnab   | 0 |
| NM_008352 | Il12b   | 0 |
| NM_008369 | Il3ra   | 0 |
| NM_008386 | Ins1    | 0 |
| NM_008388 | Eif3e   | 0 |
| NM_008459 | Klra10  | 0 |
| NM_008461 | Klra14  | 0 |
| NM_008479 | Lag3    | 0 |
| NM_008497 | Lhb     | 0 |
| NM_008703 | Nmbr    | 0 |
| NM_008733 | Nrap    | 0 |
| NM_008762 | Olfr15  | 0 |
| NM_008782 | Pax5    | 0 |
| NM_008848 | Pira6   | 0 |
| NM_008849 | Pou1f1  | 0 |
| NM_008890 | Pnmt    | 0 |
| NM_008939 | Prss12  | 0 |
| NM_008945 | Psmb4   | 0 |
| NM_008973 | Ptn     | 0 |
| NM_008989 | Pura    | 0 |
| NM_009051 | Rex2    | 0 |
| NM_009080 | Rpl26   | 0 |
| NM_009089 | Polr2a  | 0 |
| NM_009092 | Rps17   | 0 |
| NM_009094 | Rps4x   | 0 |
| NM_009095 | Rps5    | 0 |
| NM_009113 | S100a13 | 0 |
| NM_009164 | Sh3bp1  | 0 |
| NM_009167 | Shc3    | 0 |
| NM_009202 | Slc22a1 | 0 |
| NM_009213 | Smpd2   | 0 |
| NM_009258 | Spink3  | 0 |
| NM_009340 | Tcp10a  | 0 |
| NM_009354 | Tert    | 0 |
| NM_009365 | Tgfb1i1 | 0 |
| NM_009394 | Tnnc2   | 0 |
| NM_009401 | Tnfrsf8 | 0 |
| NM_009475 | Prap1   | 0 |
| NM_009490 | Vmn2r30 | 0 |
| NM_009491 | Vmn2r10 | 0 |
| NM_009512 | Slc27a5 | 0 |

|           |          |   |
|-----------|----------|---|
| NM_009561 | Zfp61    | 0 |
| NM_009569 | Zfpml    | 0 |
| NM_009580 | Zp1      | 0 |
| NM_009603 | Chrne    | 0 |
| NM_009620 | Adam4    | 0 |
| NM_009659 | Alox12b  | 0 |
| NM_009695 | Apoc2    | 0 |
| NM_009708 | Rnd2     | 0 |
| NM_009732 | Avp      | 0 |
| NM_009756 | Bmp10    | 0 |
| NM_009769 | Klf5     | 0 |
| NM_009803 | Nr1i3    | 0 |
| NM_009833 | Ccnt1    | 0 |
| NM_009853 | Cd68     | 0 |
| NM_009898 | Coro1a   | 0 |
| NM_009944 | Cox7a1   | 0 |
| NM_010039 | Defa4    | 0 |
| NM_010077 | Drd2     | 0 |
| NM_010116 | Klk1b9   | 0 |
| NM_010153 | ErbB3    | 0 |
| NM_010176 | Fah      | 0 |
| NM_010190 | Fcgb     | 0 |
| NM_010209 | Fh1      | 0 |
| NM_010244 | Fv1      | 0 |
| NM_010289 | Gja10    | 0 |
| NM_010297 | Glra4    | 0 |
| NM_010341 | Nmur1    | 0 |
| NM_010357 | Gsta4    | 0 |
| NM_010360 | Gstm5    | 0 |
| NM_010388 | H2-DMb2  | 0 |
| NM_010392 | H2-Q2    | 0 |
| NM_010454 | Hoxa6    | 0 |
| NM_010463 | Hoxc12   | 0 |
| NM_010482 | Htr1b    | 0 |
| NM_010502 | Ifna1    | 0 |
| NM_010503 | Ifna2    | 0 |
| NM_010505 | Ifna5    | 0 |
| NM_010507 | Ifna9    | 0 |
| NM_010555 | Il1r2    | 0 |
| NM_010646 | Klra12   | 0 |
| NM_010649 | Klra4    | 0 |
| NM_010664 | Krt18    | 0 |
| NM_010678 | Aff3     | 0 |
| NM_010691 | Lbx1     | 0 |
| NM_010759 | Mageb1   | 0 |
| NM_010760 | Magoh    | 0 |
| NM_010765 | Mapkapk5 | 0 |
| NM_010792 | Mettl1   | 0 |
| NM_010861 | My12     | 0 |
| NM_010924 | Nnmt     | 0 |
| NM_010970 | Olfir23  | 0 |
| NM_010974 | Olfir242 | 0 |
| NM_010980 | Olfir32  | 0 |
| NM_010983 | Olfir2   | 0 |

|           |             |   |
|-----------|-------------|---|
| NM_010984 | Olfr263-ps1 | 0 |
| NM_010990 | Olfr48      | 0 |
| NM_010997 | Olfr54      | 0 |
| NM_010998 | Olfr55      | 0 |
| NM_011001 | Olfr58      | 0 |
| NM_011002 | Olfr59      | 0 |
| NM_011021 | Otp         | 0 |
| NM_011088 | Pirall      | 0 |
| NM_011148 | Ppef2       | 0 |
| NM_011174 | Prhl        | 0 |
| NM_011188 | Psmc2       | 0 |
| NM_011227 | Rab20       | 0 |
| NM_011287 | Rpl10a      | 0 |
| NM_011288 | Mrpl23      | 0 |
| NM_011434 | Sod1        | 0 |
| NM_011449 | Spa17       | 0 |
| NM_011483 | Znrf4       | 0 |
| NM_011510 | Abcc8       | 0 |
| NM_011560 | Tcte3       | 0 |
| NM_011564 | Sry         | 0 |
| NM_011569 | Tekt1       | 0 |
| NM_011604 | Tlr6        | 0 |
| NM_011646 | Try4        | 0 |
| NM_011686 | Vmn2r88     | 0 |
| NM_011690 | Vars        | 0 |
| NM_011728 | Xpa         | 0 |
| NM_011737 | Ysk4        | 0 |
| NM_011775 | Zp2         | 0 |
| NM_011776 | Zp3         | 0 |
| NM_011910 | Uts2        | 0 |
| NM_011911 | Vmn1r49     | 0 |
| NM_011920 | Abcg2       | 0 |
| NM_011979 | Vnn3        | 0 |
| NM_012002 | Cops6       | 0 |
| NM_012029 | Ecsit       | 0 |
| NM_013459 | Cfd         | 0 |
| NM_013486 | Cd2         | 0 |
| NM_013527 | Gdf7        | 0 |
| NM_013581 | Cog1        | 0 |
| NM_013588 | Lrrc23      | 0 |
| NM_013617 | Olfr64      | 0 |
| NM_013618 | Olfr66      | 0 |
| NM_013620 | Olfr68      | 0 |
| NM_013638 | Prm3        | 0 |
| NM_013754 | Insl6       | 0 |
| NM_013765 | Rps26       | 0 |
| NM_013769 | Tjp3        | 0 |
| NM_013825 | Ly75        | 0 |
| NM_013841 | Vps45       | 0 |
| NM_013850 | Abca7       | 0 |
| NM_015738 | Galr3       | 0 |
| NM_015741 | Krtap9-1    | 0 |
| NM_015758 | Foxe3       | 0 |
| NM_015783 | Isg15       | 0 |

|           |          |   |
|-----------|----------|---|
| NM_015798 | Fbxo15   | 0 |
| NM_015808 | Krtap5-1 | 0 |
| NM_015830 | Solh     | 0 |
| NM_016685 | Comp     | 0 |
| NM_016693 | Map3k6   | 0 |
| NM_016743 | Nell2    | 0 |
| NM_016850 | Irf7     | 0 |
| NM_016864 | Atoh7    | 0 |
| NM_016901 | Oaz3     | 0 |
| NM_016983 | Vpreb2   | 0 |
| NM_017379 | Tuba8    | 0 |
| NM_017385 | Ear7     | 0 |
| NM_017388 | Ear3     | 0 |
| NM_017389 | Ear14    | 0 |
| NM_017397 | Ddx20    | 0 |
| NM_017465 | Sult2b1  | 0 |
| NM_017476 | Akap81   | 0 |
| NM_018730 | Rpl36    | 0 |
| NM_018787 | Npff     | 0 |
| NM_018852 | Scn9a    | 0 |
| NM_018853 | Rplp1    | 0 |
| NM_018870 | Pgam2    | 0 |
| NM_018879 | Npr12    | 0 |
| NM_019431 | Cacng4   | 0 |
| NM_019467 | Aif1     | 0 |
| NM_019468 | G6pd2    | 0 |
| NM_019474 | Olfr156  | 0 |
| NM_019476 | Olfr159  | 0 |
| NM_019486 | Olfr71   | 0 |
| NM_019537 | Psmg1    | 0 |
| NM_019544 | Msgn1    | 0 |
| NM_019670 | Diap3    | 0 |
| NM_019726 | Gps2     | 0 |
| NM_019735 | Apip     | 0 |
| NM_019873 | Fkbpl    | 0 |
| NM_019915 | Art2b    | 0 |
| NM_019917 | Vmn2r26  | 0 |
| NM_019918 | Vmn2r1   | 0 |
| NM_019934 | Sec1     | 0 |
| NM_019944 | Mnx1     | 0 |
| NM_019990 | Stard10  | 0 |
| NM_020002 | Rec8     | 0 |
| NM_020017 | Magea3   | 0 |
| NM_020255 | Scand1   | 0 |
| NM_020280 | Magea4   | 0 |
| NM_020288 | Olfr749  | 0 |
| NM_020289 | Olfr544  | 0 |
| NM_020290 | Olfr690  | 0 |
| NM_020291 | Olfr480  | 0 |
| NM_020491 | Ssscal   | 0 |
| NM_020501 | Tas2r105 | 0 |
| NM_020502 | Tas2r108 | 0 |
| NM_020503 | Tas2r119 | 0 |
| NM_020506 | Xpo4     | 0 |

|           |               |   |
|-----------|---------------|---|
| NM_020509 | Retnla        | 0 |
| NM_020515 | Olfrl40       | 0 |
| NM_020518 | Vsig2         | 0 |
| NM_020597 | Msb           | 0 |
| NM_020598 | Olfrl7        | 0 |
| NM_020622 | Fam3b         | 0 |
| NM_021313 | Rnf25         | 0 |
| NM_021349 | Tnfrsf13b     | 0 |
| NM_021358 | Htr6          | 0 |
| NM_021368 | Olfrl264      | 0 |
| NM_021378 | Klrc3         | 0 |
| NM_021440 | BC100451      | 0 |
| NM_021454 | Cdc42ep5      | 0 |
| NM_021482 | Syng4         | 0 |
| NM_021485 | Rps6kb2       | 0 |
| NM_021562 | Tas2r140      | 0 |
| NM_021892 | Npvf          | 0 |
| NM_023124 | H2-Q8         | 0 |
| NM_023172 | Ndufb9        | 0 |
| NM_023178 | Dmap1         | 0 |
| NM_023304 | Fgf22         | 0 |
| NM_023312 | Ndufa13       | 0 |
| NM_023374 | Sdhb          | 0 |
| NM_023438 | Tmem132e      | 0 |
| NM_023504 | Nkx2-4        | 0 |
| NM_023524 | Tfpt          | 0 |
| NM_023547 | Ino80b        | 0 |
| NM_023781 | 1700020D05Rik | 0 |
| NM_023790 | Wdr54         | 0 |
| NM_023816 | Ankrd36       | 0 |
| NM_023892 | Icam4         | 0 |
| NM_024175 | Rps23         | 0 |
| NM_024193 | Nop56         | 0 |
| NM_024197 | Ndufa10       | 0 |
| NM_024470 | Klra23        | 0 |
| NM_024477 | Ttc28         | 0 |
| NM_025302 | Mrpl2         | 0 |
| NM_025324 | Zfp524        | 0 |
| NM_025327 | Krtcap2       | 0 |
| NM_025348 | Ndufa3        | 0 |
| NM_025357 | Smpx          | 0 |
| NM_025378 | Ifitm3        | 0 |
| NM_025400 | Nat9          | 0 |
| NM_025460 | Tmem126a      | 0 |
| NM_025511 | Fam36a        | 0 |
| NM_025516 | Ergic3        | 0 |
| NM_025592 | Rpl35         | 0 |
| NM_025619 | 1700019L03Rik | 0 |
| NM_025664 | Snx9          | 0 |
| NM_025737 | 4931417E11Rik | 0 |
| NM_025779 | Ccdc109b      | 0 |
| NM_025924 | Upf3a         | 0 |
| NM_025954 | Pgp           | 0 |
| NM_025963 | Rps10         | 0 |

|           |               |   |
|-----------|---------------|---|
| NM_026007 | Eef1g         | 0 |
| NM_026090 | Iqcf4         | 0 |
| NM_026134 | Cylc1         | 0 |
| NM_026135 | Kctd16        | 0 |
| NM_026257 | Ubxn11        | 0 |
| NM_026293 | Spacal        | 0 |
| NM_026308 | Rpp21         | 0 |
| NM_026428 | Dcxr          | 0 |
| NM_026430 | Uxs1          | 0 |
| NM_026460 | Serpini2      | 0 |
| NM_026469 | Tex13a        | 0 |
| NM_026588 | Stx19         | 0 |
| NM_026591 | Mrpl24        | 0 |
| NM_026597 | 6230427J02Rik | 0 |
| NM_026601 | Hyi           | 0 |
| NM_026605 | Sympk         | 0 |
| NM_026614 | Ndufa5        | 0 |
| NM_026617 | Tmbim4        | 0 |
| NM_026629 | 2410066E13Rik | 0 |
| NM_026630 | Gtsf11        | 0 |
| NM_026652 | 4930547C10Rik | 0 |
| NM_026681 | Ccdc88c       | 0 |
| NM_026690 | Aspdh         | 0 |
| NM_026716 | Sycn          | 0 |
| NM_026720 | Ankrd13d      | 0 |
| NM_026768 | Mrps18a       | 0 |
| NM_026790 | Ifi2711       | 0 |
| NM_026808 | Fitm1         | 0 |
| NM_026837 | Tmem53        | 0 |
| NM_026851 | Mrpl52        | 0 |
| NM_026925 | Pnlip         | 0 |
| NM_026983 | Erp27         | 0 |
| NM_026991 | Sat2          | 0 |
| NM_027017 | 3300002I08Rik | 0 |
| NM_027026 | Lrrc46        | 0 |
| NM_027031 | Efcab9        | 0 |
| NM_027036 | Hmgb4         | 0 |
| NM_027055 | Spaca4        | 0 |
| NM_027064 | 1700024P04Rik | 0 |
| NM_027066 | Tmem89        | 0 |
| NM_027076 | 1700019M22Rik | 0 |
| NM_027077 | 1700016C15Rik | 0 |
| NM_027085 | Clic3         | 0 |
| NM_027179 | Tecr          | 0 |
| NM_027181 | Pin4          | 0 |
| NM_027279 | 2810422020Rik | 0 |
| NM_027285 | 1700029I01Rik | 0 |
| NM_027419 | 2810408A11Rik | 0 |
| NM_027585 | 4921517L17Rik | 0 |
| NM_027594 | Tt117         | 0 |
| NM_027640 | Prss54        | 0 |
| NM_027655 | 4933405L10Rik | 0 |
| NM_027788 | Fam83c        | 0 |
| NM_027830 | Mcm9          | 0 |

|           |               |   |
|-----------|---------------|---|
| NM_027857 | Acy3          | 0 |
| NM_027862 | Atp5h         | 0 |
| NM_027896 | Coasy         | 0 |
| NM_027918 | 1300017J02Rik | 0 |
| NM_027942 | Ddi1          | 0 |
| NM_027945 | Csl           | 0 |
| NM_027960 | Dpep3         | 0 |
| NM_027966 | 1700019017Rik | 0 |
| NM_028001 | Jsrp1         | 0 |
| NM_028050 | 1600016N20Rik | 0 |
| NM_028079 | 2010111I01Rik | 0 |
| NM_028086 | Mospd4        | 0 |
| NM_028091 | Osgepl1       | 0 |
| NM_028169 | Fam71e1       | 0 |
| NM_028179 | 2200002D01Rik | 0 |
| NM_028222 | Cdkn3         | 0 |
| NM_028275 | 1700112E06Rik | 0 |
| NM_028299 | 2700029M09Rik | 0 |
| NM_028300 | Pih1d2        | 0 |
| NM_028347 | Neill         | 0 |
| NM_028431 | Pmpcb         | 0 |
| NM_028473 | 3110079015Rik | 0 |
| NM_028494 | 1700034I23Rik | 0 |
| NM_028525 | Prss52        | 0 |
| NM_028533 | 1700065D16Rik | 0 |
| NM_028562 | 1700080E11Rik | 0 |
| NM_028589 | 1700125H20Rik | 0 |
| NM_028633 | Haus7         | 0 |
| NM_028735 | Ttc21a        | 0 |
| NM_028847 | Mageb5        | 0 |
| NM_028849 | Cldnd2        | 0 |
| NM_028854 | Tbc1d21       | 0 |
| NM_028855 | Spem1         | 0 |
| NM_028877 | Palm3         | 0 |
| NM_028946 | Nhedc1        | 0 |
| NM_028968 | Ifitm7        | 0 |
| NM_028998 | 9130404H23Rik | 0 |
| NM_029006 | Kcnk16        | 0 |
| NM_029054 | 4930443G12Rik | 0 |
| NM_029106 | 4930408F14Rik | 0 |
| NM_029199 | 4930542N07Rik | 0 |
| NM_029245 | Ankrd53       | 0 |
| NM_029272 | Ndufs7        | 0 |
| NM_029278 | Nop14         | 0 |
| NM_029289 | Cypt12        | 0 |
| NM_029300 | Iqcf5         | 0 |
| NM_029338 | Rsph9         | 0 |
| NM_029354 | Mzt2          | 0 |
| NM_029370 | 1700020C07Rik | 0 |
| NM_029377 | Lin37         | 0 |
| NM_029379 | Tmem225       | 0 |
| NM_029381 | Tex22         | 0 |
| NM_029428 | Adad2         | 0 |
| NM_029469 | Gsc2          | 0 |

|           |               |   |
|-----------|---------------|---|
| NM_029598 | 1700019B03Rik | 0 |
| NM_029602 | Znrclas       | 0 |
| NM_029608 | 1700029J11Rik | 0 |
| NM_029617 | Casc5         | 0 |
| NM_029674 | Got111        | 0 |
| NM_029686 | Pkd112        | 0 |
| NM_029693 | 1700123K08Rik | 0 |
| NM_029767 | Rps9          | 0 |
| NM_029772 | Catsper3      | 0 |
| NM_029799 | Arrdc5        | 0 |
| NM_029801 | 1700021C14Rik | 0 |
| NM_029806 | Lypd5         | 0 |
| NM_029859 | 4921530D09Rik | 0 |
| NM_029894 | Fam162b       | 0 |
| NM_029937 | Nup2101       | 0 |
| NM_029958 | Lcn12         | 0 |
| NM_029961 | Abcb5         | 0 |
| NM_029963 | Mrps5         | 0 |
| NM_029974 | Dcst1         | 0 |
| NM_029993 | Mlana         | 0 |
| NM_030028 | Tmem190       | 0 |
| NM_030055 | Tmem210       | 0 |
| NM_030083 | Lsmd1         | 0 |
| NM_030097 | 1700034E13Rik | 0 |
| NM_030104 | 1700090G07Rik | 0 |
| NM_030244 | Ier51         | 0 |
| NM_030254 | Tusc3         | 0 |
| NM_030553 | Olfr160       | 0 |
| NM_030694 | Ifitm2        | 0 |
| NM_030726 | Mrgprh        | 0 |
| NM_030734 | Defb5         | 0 |
| NM_030746 | Btn3a3        | 0 |
| NM_030747 | Btnl6         | 0 |
| NM_030890 | Prrtl         | 0 |
| NM_031165 | Hspa8         | 0 |
| NM_031171 | Mageb2        | 0 |
| NM_031493 | Xlr5c         | 0 |
| NM_031499 | Prp2          | 0 |
| NM_031867 | Tas1r1        | 0 |
| NM_032399 | Gpr87         | 0 |
| NM_032542 | Sval2         | 0 |
| NM_033563 | Klf7          | 0 |
| NM_033596 | Hist2h4       | 0 |
| NM_053112 | Ear10         | 0 |
| NM_053126 | Pcdhb1        | 0 |
| NM_053131 | Pcdhb6        | 0 |
| NM_053133 | Pcdhb8        | 0 |
| NM_053188 | Srd5a2        | 0 |
| NM_053205 | Taar1         | 0 |
| NM_053211 | Tas2r103      | 0 |
| NM_053212 | Tas2r116      | 0 |
| NM_053218 | Vmn1r48       | 0 |
| NM_053219 | Vmn1r47       | 0 |
| NM_053220 | Vmn1r43       | 0 |



|           |           |   |
|-----------|-----------|---|
| NM_053221 | Vmn1r42   | 0 |
| NM_053222 | Vmn1r52   | 0 |
| NM_053223 | V1ra8     | 0 |
| NM_053224 | Vmn1r54   | 0 |
| NM_053225 | Vmn1r50   | 0 |
| NM_053226 | Vmn1r53   | 0 |
| NM_053227 | Vmn1r44   | 0 |
| NM_053228 | Vmn1r40   | 0 |
| NM_053229 | Vmn1r46   | 0 |
| NM_053230 | Vmn1r41   | 0 |
| NM_053231 | Vmn1r10   | 0 |
| NM_053232 | Vmn1r29   | 0 |
| NM_053233 | Vmn1r11   | 0 |
| NM_053235 | Vmn1r13   | 0 |
| NM_053236 | Vmn1r15   | 0 |
| NM_053237 | Vmn1r14   | 0 |
| NM_053238 | Vmn1r25   | 0 |
| NM_053254 | Tle6      | 0 |
| NM_054038 | Scgb3a2   | 0 |
| NM_054058 | Psg20     | 0 |
| NM_054059 | Ceacam3   | 0 |
| NM_054066 | Plcz1     | 0 |
| NM_054090 | Olf1r73   | 0 |
| NM_054091 | Olf1r74   | 0 |
| NM_058214 | Recq14    | 0 |
| NM_080435 | Adcy4     | 0 |
| NM_080438 | G1ra3     | 0 |
| NM_080442 | Tssk3     | 0 |
| NM_080637 | Nme5      | 0 |
| NM_080846 | Higd1b    | 0 |
| NM_130868 | Olf1r138  | 0 |
| NM_130873 | Krtap16-4 | 0 |
| NM_130888 | Nxf7      | 0 |
| NM_133184 | Slc5a4a   | 0 |
| NM_133189 | Cacng7    | 0 |
| NM_133190 | Cacng8    | 0 |
| NM_133194 | Scml2     | 0 |
| NM_133207 | Kcnh7     | 0 |
| NM_133224 | Atp13a1   | 0 |
| NM_133435 | Nmnat1    | 0 |
| NM_133500 | Ntng2     | 0 |
| NM_133693 | Rbm42     | 0 |
| NM_133768 | As1       | 0 |
| NM_133786 | Smc4      | 0 |
| NM_133801 | Gtf2f1    | 0 |
| NM_133879 | Zbtb48    | 0 |
| NM_134159 | I117rc    | 0 |
| NM_134165 | Vmn1r37   | 0 |
| NM_134166 | Vmn1r36   | 0 |
| NM_134167 | Vmn1r35   | 0 |
| NM_134168 | Vmn1r38   | 0 |
| NM_134169 | Vmn1r33   | 0 |
| NM_134171 | Vmn1r17   | 0 |
| NM_134172 | Vmn1r26   | 0 |

|           |             |   |
|-----------|-------------|---|
| NM_134173 | Vmn1r24     | 0 |
| NM_134174 | Vmn1r5      | 0 |
| NM_134175 | Vmn1r6      | 0 |
| NM_134176 | Vmn1r4      | 0 |
| NM_134177 | Vmn1r30     | 0 |
| NM_134178 | Vmn1r22     | 0 |
| NM_134179 | Vmn1r23     | 0 |
| NM_134180 | Vmn1r28     | 0 |
| NM_134181 | Vmn1r18     | 0 |
| NM_134182 | Vmn1r19     | 0 |
| NM_134183 | Vmn1r21     | 0 |
| NM_134184 | Vmn1r16     | 0 |
| NM_134190 | Vmn1r229    | 0 |
| NM_134191 | Vmn1r226    | 0 |
| NM_134194 | Vmn1r225    | 0 |
| NM_134195 | Vmn1r227    | 0 |
| NM_134196 | Vmn1r231    | 0 |
| NM_134197 | Vmn1r230    | 0 |
| NM_134198 | Vmn1r234    | 0 |
| NM_134200 | Vmn1r237    | 0 |
| NM_134201 | Vmn1r236    | 0 |
| NM_134202 | Vmn1r233    | 0 |
| NM_134203 | Vmn1r73     | 0 |
| NM_134204 | Vmn1r80     | 0 |
| NM_134205 | Vmn1r76     | 0 |
| NM_134206 | Vmn1r74     | 0 |
| NM_134207 | Vmn1r75     | 0 |
| NM_134208 | Vmn1r78     | 0 |
| NM_134209 | Vmn1r83     | 0 |
| NM_134210 | Vmn1r81     | 0 |
| NM_134211 | Vmn1r-ps103 | 0 |
| NM_134212 | Vmn1r200    | 0 |
| NM_134213 | Vmn1r199    | 0 |
| NM_134214 | Vmn1r214    | 0 |
| NM_134215 | Vmn1r213    | 0 |
| NM_134216 | Vmn1r206    | 0 |
| NM_134217 | Vmn1r205    | 0 |
| NM_134218 | Vmn1r208    | 0 |
| NM_134219 | Vmn1r215    | 0 |
| NM_134220 | Vmn1r198    | 0 |
| NM_134221 | Vmn1r201    | 0 |
| NM_134222 | Vmn1r218    | 0 |
| NM_134224 | Vmn1r202    | 0 |
| NM_134225 | Vmn1r193    | 0 |
| NM_134226 | Vmn1r89     | 0 |
| NM_134227 | Vmn1r87     | 0 |
| NM_134228 | Vmn1r70     | 0 |
| NM_134231 | Vmn1r185    | 0 |
| NM_134233 | Vmn1r84     | 0 |
| NM_134234 | Vmn1r82     | 0 |
| NM_134235 | Vmn1r210    | 0 |
| NM_134236 | Vmn1r203    | 0 |
| NM_134237 | Vmn1r220    | 0 |
| NM_134238 | Vmn1r219    | 0 |

|           |          |   |
|-----------|----------|---|
| NM_134239 | Vmn1r217 | 0 |
| NM_134240 | Vmn1r222 | 0 |
| NM_134241 | Vmn1r212 | 0 |
| NM_134243 | Vmn1r211 | 0 |
| NM_134244 | Vmn1r197 | 0 |
| NM_134245 | Vmn1r216 | 0 |
| NM_134420 | Slc26a6  | 0 |
| NM_134436 | Vmn1r27  | 0 |
| NM_134469 | Fdps     | 0 |
| NM_138649 | Syt17    | 0 |
| NM_138674 | Pkhd111  | 0 |
| NM_138678 | Butr1    | 0 |
| NM_138746 | Fam50b   | 0 |
| NM_138945 | Pou4f3   | 0 |
| NM_138948 | Cabp7    | 0 |
| NM_138951 | Ttc36    | 0 |
| NM_139128 | Coro6    | 0 |
| NM_139151 | Spag4    | 0 |
| NM_139152 | Asb18    | 0 |
| NM_139197 | Gbgt1    | 0 |
| NM_139222 | Defb15   | 0 |
| NM_139223 | Defb13   | 0 |
| NM_139224 | Defb35   | 0 |
| NM_139296 | Moxd2    | 0 |
| NM_139301 | Catsper1 | 0 |
| NM_139310 | Otoa     | 0 |
| NM_144761 | Crygb    | 0 |
| NM_144829 | Aarsd1   | 0 |
| NM_144869 | BC021614 | 0 |
| NM_144878 | Fmo4     | 0 |
| NM_144921 | Atpla3   | 0 |
| NM_145099 | Trpv3    | 0 |
| NM_145122 | Pex16    | 0 |
| NM_145157 | Defb19   | 0 |
| NM_145224 | Tbx22    | 0 |
| NM_145229 | AY074887 | 0 |
| NM_145376 | Lpcat1   | 0 |
| NM_145395 | Duoxa1   | 0 |
| NM_145404 | Prmt7    | 0 |
| NM_145409 | Chtf18   | 0 |
| NM_145410 | Fam173a  | 0 |
| NM_145488 | Pex6     | 0 |
| NM_145573 | Mrps35   | 0 |
| NM_145636 | I127     | 0 |
| NM_145843 | Vmn1r72  | 0 |
| NM_145844 | Vmn1r189 | 0 |
| NM_145845 | Vmn1r192 | 0 |
| NM_145847 | Vmn1r85  | 0 |
| NM_145849 | Vmn1r191 | 0 |
| NM_145850 | Vmn1r188 | 0 |
| NM_145975 | Ddx46    | 0 |
| NM_146065 | Atf7     | 0 |
| NM_146159 | Haus3    | 0 |
| NM_146198 | Slc5a11  | 0 |

|           |          |   |
|-----------|----------|---|
| NM_146200 | Eif3c    | 0 |
| NM_146262 | 0lfr1290 | 0 |
| NM_146265 | 0lfr1506 | 0 |
| NM_146267 | 0lfr769  | 0 |
| NM_146269 | 0lfr247  | 0 |
| NM_146270 | 0lfr370  | 0 |
| NM_146271 | 0lfr1511 | 0 |
| NM_146272 | 0lfr930  | 0 |
| NM_146273 | 0lfr448  | 0 |
| NM_146274 | 0lfr1311 | 0 |
| NM_146275 | 0lfr1402 | 0 |
| NM_146276 | 0lfr1394 | 0 |
| NM_146277 | 0lfr1412 | 0 |
| NM_146278 | 0lfr729  | 0 |
| NM_146279 | 0lfr960  | 0 |
| NM_146280 | 0lfr281  | 0 |
| NM_146281 | 0lfr284  | 0 |
| NM_146282 | 0lfr846  | 0 |
| NM_146284 | 0lfr780  | 0 |
| NM_146285 | 0lfr801  | 0 |
| NM_146286 | 0lfr981  | 0 |
| NM_146287 | 0lfr114  | 0 |
| NM_146288 | 0lfr122  | 0 |
| NM_146289 | 0lfr113  | 0 |
| NM_146291 | 0lfr1484 | 0 |
| NM_146292 | 0lfr1324 | 0 |
| NM_146293 | 0lfr1143 | 0 |
| NM_146295 | 0lfr446  | 0 |
| NM_146296 | 0lfr437  | 0 |
| NM_146298 | 0lfr746  | 0 |
| NM_146300 | 0lfr827  | 0 |
| NM_146301 | 0lfr1475 | 0 |
| NM_146302 | 0lfr1461 | 0 |
| NM_146303 | 0lfr1449 | 0 |
| NM_146304 | 0lfr1340 | 0 |
| NM_146306 | 0lfr518  | 0 |
| NM_146307 | 0lfr498  | 0 |
| NM_146308 | 0lfr1356 | 0 |
| NM_146309 | 0lfr1337 | 0 |
| NM_146310 | 0lfr493  | 0 |
| NM_146311 | 0lfr510  | 0 |
| NM_146312 | 0lfr657  | 0 |
| NM_146313 | 0lfr145  | 0 |
| NM_146314 | 0lfr601  | 0 |
| NM_146315 | 0lfr62   | 0 |
| NM_146316 | 0lfr726  | 0 |
| NM_146317 | 0lfr725  | 0 |
| NM_146318 | 0lfr767  | 0 |
| NM_146319 | 0lfr727  | 0 |
| NM_146320 | 0lfr1145 | 0 |
| NM_146321 | 0lfr186  | 0 |
| NM_146323 | 0lfr1232 | 0 |
| NM_146324 | 0lfr809  | 0 |
| NM_146325 | 0lfr554  | 0 |

|           |          |   |
|-----------|----------|---|
| NM_146326 | 0lfr943  | 0 |
| NM_146327 | 0lfr129  | 0 |
| NM_146329 | 0lfr642  | 0 |
| NM_146330 | 0lfr958  | 0 |
| NM_146331 | 0lfr954  | 0 |
| NM_146332 | 0lfr135  | 0 |
| NM_146334 | 0lfr1330 | 0 |
| NM_146335 | 0lfr19   | 0 |
| NM_146336 | 0lfr893  | 0 |
| NM_146337 | 0lfr1396 | 0 |
| NM_146338 | 0lfr374  | 0 |
| NM_146341 | 0lfr1259 | 0 |
| NM_146342 | 0lfr1269 | 0 |
| NM_146343 | 0lfr1265 | 0 |
| NM_146344 | 0lfr1495 | 0 |
| NM_146345 | 0lfr1491 | 0 |
| NM_146346 | 0lfr397  | 0 |
| NM_146347 | 0lfr390  | 0 |
| NM_146348 | 0lfr1121 | 0 |
| NM_146349 | 0lfr1128 | 0 |
| NM_146350 | 0lfr1123 | 0 |
| NM_146351 | 0lfr1133 | 0 |
| NM_146353 | 0lfr706  | 0 |
| NM_146354 | 0lfr633  | 0 |
| NM_146355 | 0lfr692  | 0 |
| NM_146356 | 0lfr521  | 0 |
| NM_146357 | 0lfr168  | 0 |
| NM_146358 | 0lfr677  | 0 |
| NM_146359 | 0lfr564  | 0 |
| NM_146360 | 0lfr574  | 0 |
| NM_146361 | 0lfr557  | 0 |
| NM_146362 | 0lfr1312 | 0 |
| NM_146363 | 0lfr731  | 0 |
| NM_146364 | 0lfr495  | 0 |
| NM_146366 | 0lfr1093 | 0 |
| NM_146368 | 0lfr361  | 0 |
| NM_146369 | 0lfr434  | 0 |
| NM_146370 | 0lfr47   | 0 |
| NM_146371 | 0lfr1450 | 0 |
| NM_146372 | 0lfr509  | 0 |
| NM_146373 | 0lfr1253 | 0 |
| NM_146374 | 0lfr368  | 0 |
| NM_146375 | 0lfr918  | 0 |
| NM_146376 | 0lfr323  | 0 |
| NM_146377 | 0lfr127  | 0 |
| NM_146378 | 0lfr794  | 0 |
| NM_146379 | 0lfr654  | 0 |
| NM_146380 | 0lfr593  | 0 |
| NM_146381 | 0lfr1284 | 0 |
| NM_146382 | 0lfr461  | 0 |
| NM_146383 | 0lfr460  | 0 |
| NM_146384 | 0lfr208  | 0 |
| NM_146385 | 0lfr1347 | 0 |
| NM_146389 | 0lfr1350 | 0 |

|           |          |   |
|-----------|----------|---|
| NM_146390 | 0lfr1323 | 0 |
| NM_146391 | 0lfr1058 | 0 |
| NM_146392 | 0lfr720  | 0 |
| NM_146393 | 0lfr1279 | 0 |
| NM_146394 | 0lfr1278 | 0 |
| NM_146395 | 0lfr1276 | 0 |
| NM_146396 | 0lfr1277 | 0 |
| NM_146397 | 0lfr190  | 0 |
| NM_146398 | 0lfr1325 | 0 |
| NM_146399 | 0lfr1328 | 0 |
| NM_146400 | 0lfr1288 | 0 |
| NM_146401 | 0lfr1305 | 0 |
| NM_146402 | 0lfr1303 | 0 |
| NM_146403 | 0lfr1295 | 0 |
| NM_146404 | 0lfr1289 | 0 |
| NM_146405 | 0lfr228  | 0 |
| NM_146406 | 0lfr1076 | 0 |
| NM_146407 | 0lfr1079 | 0 |
| NM_146408 | 0lfr1065 | 0 |
| NM_146409 | 0lfr1080 | 0 |
| NM_146410 | 0lfr1420 | 0 |
| NM_146411 | 0lfr462  | 0 |
| NM_146413 | 0lfr463  | 0 |
| NM_146414 | 0lfr1431 | 0 |
| NM_146415 | 0lfr291  | 0 |
| NM_146416 | 0lfr290  | 0 |
| NM_146417 | 0lfr877  | 0 |
| NM_146418 | 0lfr881  | 0 |
| NM_146419 | 0lfr883  | 0 |
| NM_146420 | 0lfr738  | 0 |
| NM_146423 | 0lfr887  | 0 |
| NM_146424 | 0lfr888  | 0 |
| NM_146425 | 0lfr470  | 0 |
| NM_146426 | 0lfr469  | 0 |
| NM_146429 | 0lfr223  | 0 |
| NM_146430 | 0lfr742  | 0 |
| NM_146431 | 0lfr1510 | 0 |
| NM_146432 | 0lfr1512 | 0 |
| NM_146433 | 0lfr994  | 0 |
| NM_146434 | 0lfr995  | 0 |
| NM_146435 | 0lfr993  | 0 |
| NM_146436 | 0lfr998  | 0 |
| NM_146438 | 0lfr938  | 0 |
| NM_146439 | 0lfr937  | 0 |
| NM_146440 | 0lfr919  | 0 |
| NM_146441 | 0lfr933  | 0 |
| NM_146442 | 0lfr934  | 0 |
| NM_146443 | 0lfr382  | 0 |
| NM_146444 | 0lfr458  | 0 |
| NM_146445 | 0lfr450  | 0 |
| NM_146446 | 0lfr215  | 0 |
| NM_146447 | 0lfr1309 | 0 |
| NM_146448 | 0lfr1317 | 0 |
| NM_146449 | 0lfr1310 | 0 |

|           |          |   |
|-----------|----------|---|
| NM_146450 | 0lfr1314 | 0 |
| NM_146451 | 0lfr164  | 0 |
| NM_146452 | 0lfr694  | 0 |
| NM_146453 | 0lfr693  | 0 |
| NM_146454 | 0lfr1231 | 0 |
| NM_146455 | 0lfr1241 | 0 |
| NM_146456 | 0lfr92   | 0 |
| NM_146457 | 0lfr282  | 0 |
| NM_146458 | 0lfr1199 | 0 |
| NM_146459 | 0lfr1215 | 0 |
| NM_146461 | 0lfr1209 | 0 |
| NM_146462 | 0lfr1202 | 0 |
| NM_146463 | 0lfr1204 | 0 |
| NM_146464 | 0lfr1196 | 0 |
| NM_146465 | 0lfr108  | 0 |
| NM_146466 | 0lfr165  | 0 |
| NM_146467 | 0lfr1388 | 0 |
| NM_146468 | 0lfr1391 | 0 |
| NM_146469 | 0lfr1381 | 0 |
| NM_146471 | 0lfr1393 | 0 |
| NM_146473 | 0lfr1387 | 0 |
| NM_146474 | 0lfr1261 | 0 |
| NM_146476 | 0lfr1254 | 0 |
| NM_146477 | 0lfr90   | 0 |
| NM_146478 | 0lfr891  | 0 |
| NM_146479 | 0lfr899  | 0 |
| NM_146481 | 0lfr890  | 0 |
| NM_146482 | 0lfr889  | 0 |
| NM_146484 | 0lfr197  | 0 |
| NM_146485 | 0lfr183  | 0 |
| NM_146486 | 0lfr203  | 0 |
| NM_146487 | 0lfr130  | 0 |
| NM_146488 | 0lfr137  | 0 |
| NM_146489 | 0lfr266  | 0 |
| NM_146490 | 0lfr1411 | 0 |
| NM_146491 | 0lfr1410 | 0 |
| NM_146492 | 0lfr724  | 0 |
| NM_146493 | 0lfr730  | 0 |
| NM_146495 | 0lfr474  | 0 |
| NM_146496 | 0lfr486  | 0 |
| NM_146497 | 0lfr492  | 0 |
| NM_146498 | 0lfr490  | 0 |
| NM_146499 | 0lfr484  | 0 |
| NM_146500 | 0lfr319  | 0 |
| NM_146501 | 0lfr318  | 0 |
| NM_146502 | 0lfr328  | 0 |
| NM_146503 | 0lfr952  | 0 |
| NM_146504 | 0lfr961  | 0 |
| NM_146505 | 0lfr148  | 0 |
| NM_146506 | 0lfr945  | 0 |
| NM_146507 | 0lfr944  | 0 |
| NM_146508 | 0lfr959  | 0 |
| NM_146510 | 0lfr98   | 0 |
| NM_146511 | 0lfr107  | 0 |

|           |          |   |
|-----------|----------|---|
| NM_146512 | 0lfr97   | 0 |
| NM_146513 | 0lfr95   | 0 |
| NM_146514 | 0lfr96   | 0 |
| NM_146515 | 0lfr99   | 0 |
| NM_146518 | 0lfr523  | 0 |
| NM_146519 | 0lfr530  | 0 |
| NM_146522 | 0lfr854  | 0 |
| NM_146523 | 0lfr850  | 0 |
| NM_146524 | 0lfr855  | 0 |
| NM_146525 | 0lfr847  | 0 |
| NM_146526 | 0lfr859  | 0 |
| NM_146527 | 0lfr849  | 0 |
| NM_146528 | 0lfr860  | 0 |
| NM_146529 | 0lfr1183 | 0 |
| NM_146530 | 0lfr1186 | 0 |
| NM_146531 | 0lfr1168 | 0 |
| NM_146532 | 0lfr1170 | 0 |
| NM_146533 | 0lfr1367 | 0 |
| NM_146534 | 0lfr1368 | 0 |
| NM_146535 | 0lfr1370 | 0 |
| NM_146537 | 0lfr311  | 0 |
| NM_146538 | 0lfr315  | 0 |
| NM_146539 | 0lfr373  | 0 |
| NM_146540 | 0lfr1364 | 0 |
| NM_146541 | 0lfr1361 | 0 |
| NM_146542 | 0lfr11   | 0 |
| NM_146543 | 0lfr1360 | 0 |
| NM_146544 | 0lfr777  | 0 |
| NM_146545 | 0lfr775  | 0 |
| NM_146547 | 0lfr771  | 0 |
| NM_146548 | 0lfr800  | 0 |
| NM_146549 | 0lfr786  | 0 |
| NM_146550 | 0lfr810  | 0 |
| NM_146551 | 0lfr788  | 0 |
| NM_146552 | 0lfr811  | 0 |
| NM_146553 | 0lfr806  | 0 |
| NM_146554 | 0lfr803  | 0 |
| NM_146555 | 0lfr805  | 0 |
| NM_146556 | 0lfr798  | 0 |
| NM_146557 | 0lfr869  | 0 |
| NM_146558 | 0lfr866  | 0 |
| NM_146559 | 0lfr868  | 0 |
| NM_146561 | 0lfr873  | 0 |
| NM_146562 | 0lfr862  | 0 |
| NM_146563 | 0lfr18   | 0 |
| NM_146564 | 0lfr836  | 0 |
| NM_146565 | 0lfr837  | 0 |
| NM_146566 | 0lfr830  | 0 |
| NM_146568 | 0lfr1012 | 0 |
| NM_146569 | 0lfr1014 | 0 |
| NM_146570 | 0lfr1006 | 0 |
| NM_146571 | 0lfr1015 | 0 |
| NM_146572 | 0lfr1009 | 0 |
| NM_146573 | 0lfr1002 | 0 |



|           |          |   |
|-----------|----------|---|
| NM_146575 | 0lfr1457 | 0 |
| NM_146576 | 0lfr459  | 0 |
| NM_146577 | 0lfr1043 | 0 |
| NM_146579 | 0lfr1032 | 0 |
| NM_146580 | 0lfr1020 | 0 |
| NM_146582 | 0lfr1046 | 0 |
| NM_146583 | 0lfr52   | 0 |
| NM_146584 | 0lfr1026 | 0 |
| NM_146586 | 0lfr1018 | 0 |
| NM_146587 | 0lfr1023 | 0 |
| NM_146588 | 0lfr1030 | 0 |
| NM_146589 | 0lfr1022 | 0 |
| NM_146590 | 0lfr1085 | 0 |
| NM_146591 | 0lfr1101 | 0 |
| NM_146592 | 0lfr1086 | 0 |
| NM_146593 | 0lfr1111 | 0 |
| NM_146594 | 0lfr1100 | 0 |
| NM_146596 | 0lfr703  | 0 |
| NM_146598 | 0lfr695  | 0 |
| NM_146600 | 0lfr700  | 0 |
| NM_146601 | 0lfr710  | 0 |
| NM_146602 | 0lfr698  | 0 |
| NM_146604 | 0lfr716  | 0 |
| NM_146605 | 0lfr828  | 0 |
| NM_146606 | 0lfr24   | 0 |
| NM_146607 | 0lfr270  | 0 |
| NM_146608 | 0lfr984  | 0 |
| NM_146609 | 0lfr150  | 0 |
| NM_146610 | 0lfr972  | 0 |
| NM_146611 | 0lfr970  | 0 |
| NM_146613 | 0lfr229  | 0 |
| NM_146614 | 0lfr971  | 0 |
| NM_146615 | 0lfr986  | 0 |
| NM_146616 | 0lfr305  | 0 |
| NM_146617 | 0lfr307  | 0 |
| NM_146618 | 0lfr297  | 0 |
| NM_146619 | 0lfr303  | 0 |
| NM_146620 | 0lfr292  | 0 |
| NM_146621 | 0lfr308  | 0 |
| NM_146622 | 0lfr360  | 0 |
| NM_146623 | 0lfr357  | 0 |
| NM_146624 | 0lfr356  | 0 |
| NM_146625 | 0lfr355  | 0 |
| NM_146627 | 0lfr350  | 0 |
| NM_146628 | 0lfr344  | 0 |
| NM_146630 | 0lfr123  | 0 |
| NM_146631 | 0lfr120  | 0 |
| NM_146632 | 0lfr116  | 0 |
| NM_146633 | 0lfr1501 | 0 |
| NM_146634 | 0lfr1504 | 0 |
| NM_146635 | 0lfr1489 | 0 |
| NM_146636 | 0lfr1487 | 0 |
| NM_146637 | 0lfr1141 | 0 |
| NM_146638 | 0lfr1151 | 0 |

|           |             |   |
|-----------|-------------|---|
| NM_146639 | 0lfr1138    | 0 |
| NM_146640 | 0lfr1153    | 0 |
| NM_146643 | 0lfr1155    | 0 |
| NM_146645 | 0lfr1158    | 0 |
| NM_146646 | 0lfr152     | 0 |
| NM_146647 | 0lfr1154    | 0 |
| NM_146648 | 0lfr1165-ps | 0 |
| NM_146649 | 0lfr1160    | 0 |
| NM_146651 | 0lfr418-ps1 | 0 |
| NM_146652 | 0lfr13      | 0 |
| NM_146653 | 0lfr435     | 0 |
| NM_146654 | 0lfr237-ps1 | 0 |
| NM_146655 | 0lfr441     | 0 |
| NM_146656 | 0lfr444     | 0 |
| NM_146658 | 0lfr1131    | 0 |
| NM_146660 | 0lfr1135    | 0 |
| NM_146661 | 0lfr1112    | 0 |
| NM_146662 | 0lfr365     | 0 |
| NM_146663 | 0lfr733     | 0 |
| NM_146664 | 0lfr734     | 0 |
| NM_146666 | 0lfr736     | 0 |
| NM_146667 | 0lfr740     | 0 |
| NM_146668 | 0lfr739     | 0 |
| NM_146670 | 0lfr815     | 0 |
| NM_146671 | 0lfr822     | 0 |
| NM_146672 | 0lfr816     | 0 |
| NM_146673 | 0lfr823     | 0 |
| NM_146674 | 0lfr824     | 0 |
| NM_146675 | 0lfr820     | 0 |
| NM_146676 | 0lfr826     | 0 |
| NM_146677 | 0lfr825     | 0 |
| NM_146678 | 0lfr1428    | 0 |
| NM_146679 | 0lfr1427    | 0 |
| NM_146680 | 0lfr1423    | 0 |
| NM_146681 | 0lfr1424    | 0 |
| NM_146682 | 0lfr76      | 0 |
| NM_146683 | 0lfr1441    | 0 |
| NM_146684 | 0lfr1440    | 0 |
| NM_146685 | 0lfr1433    | 0 |
| NM_146686 | 0lfr235     | 0 |
| NM_146687 | 0lfr1436    | 0 |
| NM_146688 | 0lfr262     | 0 |
| NM_146689 | 0lfr1459    | 0 |
| NM_146690 | 0lfr1472    | 0 |
| NM_146691 | 0lfr1467    | 0 |
| NM_146692 | 0lfr1454    | 0 |
| NM_146693 | 0lfr1462    | 0 |
| NM_146694 | 0lfr1466    | 0 |
| NM_146695 | 0lfr1469    | 0 |
| NM_146696 | 0lfr1477    | 0 |
| NM_146699 | 0lfr1445    | 0 |
| NM_146700 | 0lfr1453    | 0 |
| NM_146701 | 0lfr1448    | 0 |
| NM_146702 | 0lfr1444    | 0 |

|           |          |   |
|-----------|----------|---|
| NM_146703 | 0lfr1447 | 0 |
| NM_146704 | 0lfr1446 | 0 |
| NM_146705 | 0lfr1451 | 0 |
| NM_146706 | 0lfr401  | 0 |
| NM_146707 | 0lfr410  | 0 |
| NM_146708 | 0lfr402  | 0 |
| NM_146709 | 0lfr411  | 0 |
| NM_146710 | 0lfr398  | 0 |
| NM_146713 | 0lfr1342 | 0 |
| NM_146716 | 0lfr432  | 0 |
| NM_146718 | 0lfr430  | 0 |
| NM_146720 | 0lfr421  | 0 |
| NM_146721 | 0lfr424  | 0 |
| NM_146722 | 0lfr429  | 0 |
| NM_146723 | 0lfr513  | 0 |
| NM_146724 | 0lfr512  | 0 |
| NM_146725 | 0lfr516  | 0 |
| NM_146726 | 0lfr514  | 0 |
| NM_146727 | 0lfr611  | 0 |
| NM_146728 | 0lfr781  | 0 |
| NM_146729 | 0lfr784  | 0 |
| NM_146730 | 0lfr1095 | 0 |
| NM_146731 | 0lfr599  | 0 |
| NM_146732 | 0lfr488  | 0 |
| NM_146733 | 0lfr482  | 0 |
| NM_146734 | 0lfr478  | 0 |
| NM_146735 | 0lfr483  | 0 |
| NM_146736 | 0lfr491  | 0 |
| NM_146737 | 0lfr494  | 0 |
| NM_146738 | 0lfr497  | 0 |
| NM_146739 | 0lfr502  | 0 |
| NM_146741 | 0lfr1497 | 0 |
| NM_146742 | 0lfr1316 | 0 |
| NM_146743 | 0lfr507  | 0 |
| NM_146744 | 0lfr1362 | 0 |
| NM_146745 | 0lfr957  | 0 |
| NM_146746 | 0lfr935  | 0 |
| NM_146747 | 0lfr146  | 0 |
| NM_146748 | 0lfr661  | 0 |
| NM_146749 | 0lfr875  | 0 |
| NM_146750 | 0lfr689  | 0 |
| NM_146751 | 0lfr648  | 0 |
| NM_146752 | 0lfr1106 | 0 |
| NM_146753 | 0lfr1195 | 0 |
| NM_146754 | 0lfr556  | 0 |
| NM_146756 | 0lfr608  | 0 |
| NM_146757 | 0lfr583  | 0 |
| NM_146758 | 0lfr678  | 0 |
| NM_146759 | 0lfr214  | 0 |
| NM_146760 | 0lfr672  | 0 |
| NM_146761 | 0lfr414  | 0 |
| NM_146762 | 0lfr1013 | 0 |
| NM_146764 | 0lfr1408 | 0 |
| NM_146766 | 0lfr1109 | 0 |

|           |          |   |
|-----------|----------|---|
| NM_146767 | 0lfr1104 | 0 |
| NM_146768 | 0lfr1099 | 0 |
| NM_146769 | 0lfr1110 | 0 |
| NM_146770 | 0lfr259  | 0 |
| NM_146771 | 0lfr1176 | 0 |
| NM_146772 | 0lfr1189 | 0 |
| NM_146773 | 0lfr508  | 0 |
| NM_146774 | 0lfr472  | 0 |
| NM_146775 | 0lfr473  | 0 |
| NM_146776 | 0lfr821  | 0 |
| NM_146777 | 0lfr818  | 0 |
| NM_146778 | 0lfr1208 | 0 |
| NM_146779 | 0lfr196  | 0 |
| NM_146781 | 0lfr922  | 0 |
| NM_146783 | 0lfr26   | 0 |
| NM_146784 | 0lfr916  | 0 |
| NM_146785 | 0lfr915  | 0 |
| NM_146786 | 0lfr914  | 0 |
| NM_146789 | 0lfr1230 | 0 |
| NM_146790 | 0lfr1238 | 0 |
| NM_146792 | 0lfr1246 | 0 |
| NM_146793 | 0lfr1271 | 0 |
| NM_146794 | 0lfr1263 | 0 |
| NM_146795 | 0lfr812  | 0 |
| NM_146796 | 0lfr1499 | 0 |
| NM_146797 | 0lfr1502 | 0 |
| NM_146798 | 0lfr878  | 0 |
| NM_146801 | 0lfr904  | 0 |
| NM_146803 | 0lfr906  | 0 |
| NM_146804 | 0lfr905  | 0 |
| NM_146805 | 0lfr907  | 0 |
| NM_146806 | 0lfr143  | 0 |
| NM_146807 | 0lfr136  | 0 |
| NM_146808 | 0lfr1240 | 0 |
| NM_146810 | 0lfr912  | 0 |
| NM_146811 | 0lfr910  | 0 |
| NM_146812 | 0lfr620  | 0 |
| NM_146814 | 0lfr665  | 0 |
| NM_146815 | 0lfr926  | 0 |
| NM_146816 | 0lfr923  | 0 |
| NM_146817 | 0lfr1156 | 0 |
| NM_146818 | 0lfr1218 | 0 |
| NM_146819 | 0lfr466  | 0 |
| NM_146820 | 0lfr655  | 0 |
| NM_146822 | 0lfr640  | 0 |
| NM_146823 | 0lfr1184 | 0 |
| NM_146824 | 0lfr273  | 0 |
| NM_146825 | 0lfr39   | 0 |
| NM_146826 | 0lfr969  | 0 |
| NM_146827 | 0lfr983  | 0 |
| NM_146828 | 0lfr975  | 0 |
| NM_146831 | 0lfr133  | 0 |
| NM_146832 | 0lfr134  | 0 |
| NM_146833 | 0lfr103  | 0 |

|           |             |   |
|-----------|-------------|---|
| NM_146834 | 0lfr101     | 0 |
| NM_146835 | 0lfr109     | 0 |
| NM_146836 | 0lfr1132    | 0 |
| NM_146837 | 0lfr1126    | 0 |
| NM_146838 | 0lfr1130    | 0 |
| NM_146839 | 0lfr272     | 0 |
| NM_146840 | 0lfr545     | 0 |
| NM_146841 | 0lfr617     | 0 |
| NM_146843 | 0lfr1097    | 0 |
| NM_146845 | 0lfr1098    | 0 |
| NM_146846 | 0lfr1087    | 0 |
| NM_146847 | 0lfr1090    | 0 |
| NM_146848 | 0lfr1161    | 0 |
| NM_146849 | 0lfr1157    | 0 |
| NM_146851 | 0lfr295     | 0 |
| NM_146852 | 0lfr1339    | 0 |
| NM_146853 | 0lfr1341    | 0 |
| NM_146854 | 0lfr982     | 0 |
| NM_146858 | 0lfr275     | 0 |
| NM_146859 | 0lfr371     | 0 |
| NM_146860 | 0lfr161     | 0 |
| NM_146861 | 0lfr9       | 0 |
| NM_146862 | 0lfr763     | 0 |
| NM_146863 | 0lfr770     | 0 |
| NM_146864 | 0lfr768     | 0 |
| NM_146865 | 0lfr992     | 0 |
| NM_146866 | 0lfr1008    | 0 |
| NM_146867 | 0lfr131     | 0 |
| NM_146868 | 0lfr894     | 0 |
| NM_146869 | 0lfr147     | 0 |
| NM_146870 | 0lfr25      | 0 |
| NM_146871 | 0lfr898     | 0 |
| NM_146872 | 0lfr908     | 0 |
| NM_146873 | 0lfr911-ps1 | 0 |
| NM_146874 | 0lfr900     | 0 |
| NM_146875 | 0lfr895     | 0 |
| NM_146877 | 0lfr1395    | 0 |
| NM_146882 | 0lfr874     | 0 |
| NM_146884 | 0lfr1299    | 0 |
| NM_146885 | 0lfr1294    | 0 |
| NM_146886 | 0lfr1298    | 0 |
| NM_146887 | 0lfr1301    | 0 |
| NM_146888 | 0lfr1297    | 0 |
| NM_146889 | 0lfr1302    | 0 |
| NM_146890 | 0lfr126     | 0 |
| NM_146892 | 0lfr1223    | 0 |
| NM_146893 | 0lfr1216    | 0 |
| NM_146895 | 0lfr1201    | 0 |
| NM_146896 | 0lfr1205    | 0 |
| NM_146897 | 0lfr1214    | 0 |
| NM_146898 | 0lfr1213    | 0 |
| NM_146899 | 0lfr1219    | 0 |
| NM_146900 | 0lfr1220    | 0 |
| NM_146901 | 0lfr1217    | 0 |

|           |          |   |
|-----------|----------|---|
| NM_146902 | 0lfr1221 | 0 |
| NM_146904 | 0lfr870  | 0 |
| NM_146905 | 0lfr851  | 0 |
| NM_146906 | 0lfr853  | 0 |
| NM_146907 | 0lfr1282 | 0 |
| NM_146908 | 0lfr1280 | 0 |
| NM_146909 | 0lfr51   | 0 |
| NM_146910 | 0lfr1378 | 0 |
| NM_146911 | 0lfr1377 | 0 |
| NM_146912 | 0lfr211  | 0 |
| NM_146913 | 0lfr1348 | 0 |
| NM_146914 | 0lfr5    | 0 |
| NM_146915 | 0lfr1336 | 0 |
| NM_146916 | 0lfr1346 | 0 |
| NM_146917 | 0lfr1179 | 0 |
| NM_146919 | 0lfr1188 | 0 |
| NM_146920 | 0lfr267  | 0 |
| NM_146921 | 0lfr1    | 0 |
| NM_146923 | 0lfr20   | 0 |
| NM_146924 | 0lfr476  | 0 |
| NM_146925 | 0lfr481  | 0 |
| NM_146926 | 0lfr477  | 0 |
| NM_146927 | 0lfr799  | 0 |
| NM_146928 | 0lfr808  | 0 |
| NM_146929 | 0lfr807  | 0 |
| NM_146930 | 0lfr791  | 0 |
| NM_146931 | 0lfr796  | 0 |
| NM_146932 | 0lfr802  | 0 |
| NM_146933 | 0lfr790  | 0 |
| NM_146934 | 0lfr46   | 0 |
| NM_146935 | 0lfr167  | 0 |
| NM_146936 | 0lfr1417 | 0 |
| NM_146937 | 0lfr63   | 0 |
| NM_146938 | 0lfr346  | 0 |
| NM_146939 | 0lfr354  | 0 |
| NM_146940 | 0lfr352  | 0 |
| NM_146941 | 0lfr353  | 0 |
| NM_146942 | 0lfr351  | 0 |
| NM_146943 | 0lfr347  | 0 |
| NM_146944 | 0lfr348  | 0 |
| NM_146945 | 0lfr345  | 0 |
| NM_146946 | 0lfr50   | 0 |
| NM_146947 | 0lfr338  | 0 |
| NM_146948 | 0lfr342  | 0 |
| NM_146949 | 0lfr339  | 0 |
| NM_146950 | 0lfr341  | 0 |
| NM_146951 | 0lfr340  | 0 |
| NM_146952 | 0lfr522  | 0 |
| NM_146953 | 0lfr531  | 0 |
| NM_146954 | 0lfr535  | 0 |
| NM_146955 | 0lfr60   | 0 |
| NM_146956 | 0lfr525  | 0 |
| NM_146957 | 0lfr170  | 0 |
| NM_146958 | 0lfr171  | 0 |

|           |             |   |
|-----------|-------------|---|
| NM_146959 | 0lfr631     | 0 |
| NM_146960 | 0lfr53      | 0 |
| NM_146961 | 0lfr539     | 0 |
| NM_146962 | 0lfr541     | 0 |
| NM_146963 | 0lfr45      | 0 |
| NM_146964 | 0lfr61      | 0 |
| NM_146965 | 0lfr1250    | 0 |
| NM_146967 | 0lfr1226    | 0 |
| NM_146969 | 0lfr1243    | 0 |
| NM_146970 | 0lfr1239    | 0 |
| NM_146971 | 0lfr1228    | 0 |
| NM_146972 | 0lfr1233    | 0 |
| NM_146973 | 0lfr1234    | 0 |
| NM_146974 | 0lfr1262    | 0 |
| NM_146975 | 0lfr1273-ps | 0 |
| NM_146977 | 0lfr1255    | 0 |
| NM_146978 | 0lfr1258    | 0 |
| NM_146980 | 0lfr1272    | 0 |
| NM_146981 | 0lfr1260    | 0 |
| NM_146982 | 0lfr1257    | 0 |
| NM_146983 | 0lfr1256    | 0 |
| NM_146984 | 0lfr142     | 0 |
| NM_146986 | 0lfr38      | 0 |
| NM_146987 | 0lfr457     | 0 |
| NM_146988 | 0lfr447     | 0 |
| NM_146990 | 0lfr1494    | 0 |
| NM_146991 | 0lfr206     | 0 |
| NM_146992 | 0lfr204     | 0 |
| NM_146993 | 0lfr176     | 0 |
| NM_146994 | 0lfr201     | 0 |
| NM_146995 | 0lfr202     | 0 |
| NM_146996 | 0lfr177     | 0 |
| NM_146997 | 0lfr178     | 0 |
| NM_146998 | 0lfr195     | 0 |
| NM_147002 | 0lfr175-ps1 | 0 |
| NM_147003 | 0lfr139     | 0 |
| NM_147005 | 0lfr395     | 0 |
| NM_147006 | 0lfr392     | 0 |
| NM_147007 | 0lfr394     | 0 |
| NM_147008 | 0lfr393     | 0 |
| NM_147009 | 0lfr389     | 0 |
| NM_147010 | 0lfr1052    | 0 |
| NM_147011 | 0lfr1044    | 0 |
| NM_147012 | 0lfr1047    | 0 |
| NM_147014 | 0lfr1048    | 0 |
| NM_147015 | 0lfr1019    | 0 |
| NM_147016 | 0lfr1049    | 0 |
| NM_147017 | 0lfr1045    | 0 |
| NM_147019 | 0lfr1054    | 0 |
| NM_147021 | 0lfr1055    | 0 |
| NM_147022 | 0lfr381     | 0 |
| NM_147023 | 0lfr385     | 0 |
| NM_147024 | 0lfr378     | 0 |
| NM_147025 | 0lfr380     | 0 |

|           |          |   |
|-----------|----------|---|
| NM_147026 | 0lfr532  | 0 |
| NM_147027 | 0lfr31   | 0 |
| NM_147028 | 0lfr1124 | 0 |
| NM_147029 | 0lfr1120 | 0 |
| NM_147031 | 0lfr1122 | 0 |
| NM_147032 | 0lfr705  | 0 |
| NM_147033 | 0lfr714  | 0 |
| NM_147034 | 0lfr713  | 0 |
| NM_147035 | 0lfr711  | 0 |
| NM_147036 | 0lfr283  | 0 |
| NM_147037 | 0lfr1413 | 0 |
| NM_147038 | 0lfr1416 | 0 |
| NM_147040 | 0lfr1351 | 0 |
| NM_147043 | 0lfr669  | 0 |
| NM_147044 | 0lfr679  | 0 |
| NM_147045 | 0lfr683  | 0 |
| NM_147046 | 0lfr600  | 0 |
| NM_147047 | 0lfr618  | 0 |
| NM_147048 | 0lfr652  | 0 |
| NM_147050 | 0lfr659  | 0 |
| NM_147051 | 0lfr362  | 0 |
| NM_147052 | 0lfr589  | 0 |
| NM_147053 | 0lfr582  | 0 |
| NM_147054 | 0lfr584  | 0 |
| NM_147055 | 0lfr649  | 0 |
| NM_147056 | 0lfr646  | 0 |
| NM_147059 | 0lfr668  | 0 |
| NM_147060 | 0lfr667  | 0 |
| NM_147061 | 0lfr691  | 0 |
| NM_147063 | 0lfr520  | 0 |
| NM_147064 | 0lfr449  | 0 |
| NM_147065 | 0lfr1390 | 0 |
| NM_147066 | 0lfr1389 | 0 |
| NM_147067 | 0lfr829  | 0 |
| NM_147068 | 0lfr166  | 0 |
| NM_147069 | 0lfr686  | 0 |
| NM_147070 | 0lfr603  | 0 |
| NM_147071 | 0lfr1352 | 0 |
| NM_147072 | 0lfr641  | 0 |
| NM_147073 | 0lfr33   | 0 |
| NM_147075 | 0lfr656  | 0 |
| NM_147077 | 0lfr643  | 0 |
| NM_147078 | 0lfr1062 | 0 |
| NM_147079 | 0lfr547  | 0 |
| NM_147080 | 0lfr615  | 0 |
| NM_147081 | 0lfr610  | 0 |
| NM_147082 | 0lfr609  | 0 |
| NM_147083 | 0lfr622  | 0 |
| NM_147084 | 0lfr639  | 0 |
| NM_147085 | 0lfr571  | 0 |
| NM_147087 | 0lfr585  | 0 |
| NM_147088 | 0lfr569  | 0 |
| NM_147089 | 0lfr572  | 0 |
| NM_147091 | 0lfr568  | 0 |



|           |               |   |
|-----------|---------------|---|
| NM_147092 | 0lfr561       | 0 |
| NM_147094 | 0lfr606       | 0 |
| NM_147095 | 0lfr676       | 0 |
| NM_147096 | 0lfr666       | 0 |
| NM_147097 | 0lfr628       | 0 |
| NM_147099 | 0lfr616       | 0 |
| NM_147101 | 0lfr549       | 0 |
| NM_147102 | 0lfr552       | 0 |
| NM_147103 | 0lfr555       | 0 |
| NM_147105 | 0lfr978       | 0 |
| NM_147106 | 0lfr980       | 0 |
| NM_147107 | 0lfr974       | 0 |
| NM_147109 | 0lfr577       | 0 |
| NM_147110 | 0lfr570       | 0 |
| NM_147111 | 0lfr586       | 0 |
| NM_147112 | 0lfr559       | 0 |
| NM_147113 | 0lfr560       | 0 |
| NM_147114 | 0lfr575       | 0 |
| NM_147115 | 0lfr578       | 0 |
| NM_147118 | 0lfr635       | 0 |
| NM_147119 | 0lfr632       | 0 |
| NM_147120 | 0lfr638       | 0 |
| NM_147121 | 0lfr644       | 0 |
| NM_148413 | Myo3a         | 0 |
| NM_148943 | Usp9y         | 0 |
| NM_148947 | Ly6g5c        | 0 |
| NM_148953 | Asb16         | 0 |
| NM_153052 | Gzmn          | 0 |
| NM_153059 | Tmem5         | 0 |
| NM_153075 | Catsper2      | 0 |
| NM_153076 | Crygn         | 0 |
| NM_153095 | Mrgpral       | 0 |
| NM_153096 | Zfp353        | 0 |
| NM_153122 | Oplah         | 0 |
| NM_153156 | Stoml3        | 0 |
| NM_153194 | Zfp740        | 0 |
| NM_153397 | Adam32        | 0 |
| NM_153513 | BC028528      | 0 |
| NM_153577 | AI428936      | 0 |
| NM_153597 | Trpt1         | 0 |
| NM_153601 | Lgsn          | 0 |
| NM_153760 | Mill2         | 0 |
| NM_153788 | Acap1         | 0 |
| NM_153806 | Dnttip2       | 0 |
| NM_170757 | A630007B06Rik | 0 |
| NM_170779 | Wwc1          | 0 |
| NM_172143 | Ofcc1         | 0 |
| NM_172279 | Mark4         | 0 |
| NM_172280 | 2210018M11Rik | 0 |
| NM_172287 | Spire2        | 0 |
| NM_172339 | Snapc4        | 0 |
| NM_172419 | 9030612E09Rik | 0 |
| NM_172582 | Coq6          | 0 |
| NM_172594 | Dhx29         | 0 |

|           |               |   |
|-----------|---------------|---|
| NM_172607 | Naprt1        | 0 |
| NM_172681 | D930015E06Rik | 0 |
| NM_172768 | Gramdlb       | 0 |
| NM_172800 | Sdk2          | 0 |
| NM_172808 | Antxrl        | 0 |
| NM_172888 | Svs1          | 0 |
| NM_173008 | A430110N23Rik | 0 |
| NM_173070 | Sprr4         | 0 |
| NM_173184 | Rln3          | 0 |
| NM_173379 | Leprel1       | 0 |
| NM_173771 | 4933406M09Rik | 0 |
| NM_174853 | Discl         | 0 |
| NM_174865 | Klk15         | 0 |
| NM_174985 | Gpbar1        | 0 |
| NM_175016 | Alkbh2        | 0 |
| NM_175017 | 4933427D06Rik | 0 |
| NM_175020 | Prss58        | 0 |
| NM_175097 | Prickle3      | 0 |
| NM_175103 | Bola2         | 0 |
| NM_175165 | Tprg          | 0 |
| NM_175327 | B630019K06Rik | 0 |
| NM_175350 | Tmem146       | 0 |
| NM_175470 | Gpr61         | 0 |
| NM_175502 | Tmem74        | 0 |
| NM_175517 | 4930412F15Rik | 0 |
| NM_175537 | Zbtb38        | 0 |
| NM_175645 | Xylt1         | 0 |
| NM_175651 | Cnpy1         | 0 |
| NM_175667 | Ankrd5        | 0 |
| NM_175674 | Vmn2r7        | 0 |
| NM_176921 | 6030419C18Rik | 0 |
| NM_176973 | Podxl2        | 0 |
| NM_176980 | Ankar         | 0 |
| NM_177061 | Olfr1344      | 0 |
| NM_177090 | Cdh29         | 0 |
| NM_177117 | Dlecl         | 0 |
| NM_177142 | Lipi          | 0 |
| NM_177279 | 4732415M23Rik | 0 |
| NM_177316 | Fpr-rs6       | 0 |
| NM_177348 | Ifne          | 0 |
| NM_177363 | Tarm1         | 0 |
| NM_177396 | I128b         | 0 |
| NM_177610 | Duox2         | 0 |
| NM_177634 | H2-M10.4      | 0 |
| NM_177635 | H2-M11        | 0 |
| NM_177636 | H2-M1         | 0 |
| NM_177655 | Cst11         | 0 |
| NM_177658 | Ralgapb       | 0 |
| NM_177703 | Fbxw19        | 0 |
| NM_177764 | Vmn2r57       | 0 |
| NM_177801 | 4933400C05Rik | 0 |
| NM_177813 | Gm5087        | 0 |
| NM_177816 | Sh2d4b        | 0 |
| NM_177865 | Skint2        | 0 |

|           |               |   |
|-----------|---------------|---|
| NM_177893 | Fan1          | 0 |
| NM_177897 | B4galnt4      | 0 |
| NM_177905 | Piwil4        | 0 |
| NM_177923 | H2-M10.2      | 0 |
| NM_178028 | Galp          | 0 |
| NM_178240 | Trim50        | 0 |
| NM_178241 | Cxcr1         | 0 |
| NM_178245 | Bsx           | 0 |
| NM_178337 | Tbce          | 0 |
| NM_178372 | Prss34        | 0 |
| NM_178577 | Tmem205       | 0 |
| NM_178591 | Nrg1          | 0 |
| NM_178596 | Gjd3          | 0 |
| NM_178614 | Samm50        | 0 |
| NM_178735 | A730069N07Rik | 0 |
| NM_178773 | Ano4          | 0 |
| NM_178889 | Zscan29       | 0 |
| NM_178933 | Ostb          | 0 |
| NM_181275 | Tas2r139      | 0 |
| NM_181276 | Tas2r136      | 0 |
| NM_181423 | Supv311       | 0 |
| NM_181517 | Ipo7          | 0 |
| NM_181542 | Slfn10-ps     | 0 |
| NM_181729 | Muc6          | 0 |
| NM_181749 | Gpr142        | 0 |
| NM_181752 | Gpr135        | 0 |
| NM_181817 | Rxfp4         | 0 |
| NM_182694 | Ggn           | 0 |
| NM_182714 | Olfir91       | 0 |
| NM_182929 | Rims3         | 0 |
| NM_183023 | Rims4         | 0 |
| NM_183035 | Defb34        | 0 |
| NM_183036 | Defb38        | 0 |
| NM_183039 | Defb40        | 0 |
| NM_183112 | 1700029I15Rik | 0 |
| NM_183131 | 4930451I11Rik | 0 |
| NM_183209 | Gprin2        | 0 |
| NM_183253 | Defa21        | 0 |
| NM_183268 | Defa20        | 0 |
| NM_183282 | Act19         | 0 |
| NM_183287 | 2610318N02Rik | 0 |
| NM_183298 | Foxe1         | 0 |
| NM_183300 | Zfyve9        | 0 |
| NM_183318 | Rgag4         | 0 |
| NM_184109 | Rtl1          | 0 |
| NM_194057 | Ffar1         | 0 |
| NM_194350 | Mafa          | 0 |
| NM_197993 | Tut1          | 0 |
| NM_198109 | Ssh1          | 0 |
| NM_198621 | Cct811        | 0 |
| NM_198633 | Gm5124        | 0 |
| NM_198662 | 9430007A20Rik | 0 |
| NM_198668 | 4930590J08Rik | 0 |
| NM_198675 | Fdxacb1       | 0 |

|           |              |   |
|-----------|--------------|---|
| NM_198884 | B4galnt3     | 0 |
| NM_198898 | Ssxb3        | 0 |
| NM_199013 | Irgc1        | 0 |
| NM_199058 | Gpr6         | 0 |
| NM_199063 | Ssx9         | 0 |
| NM_199153 | Tas2r102     | 0 |
| NM_199154 | Tas2r107     | 0 |
| NM_199155 | Tas2r110     | 0 |
| NM_199156 | Tas2r130     | 0 |
| NM_199158 | Tas2r134     | 0 |
| NM_199159 | Tas2r135     | 0 |
| NM_199201 | Cd3001h      | 0 |
| NM_199223 | Rtn4r12      | 0 |
| NM_199225 | Cd300c       | 0 |
| NM_199309 | Zdhhc19      | 0 |
| NM_199319 | Ssxb5        | 0 |
| NM_199364 | Lzts1        | 0 |
| NM_199470 | Cdh24        | 0 |
| NM_201366 | Gm1631       | 0 |
| NM_201376 | Serpinb3d    | 0 |
| NM_201409 | Dub1a        | 0 |
| NM_203489 | Vmn1r183     | 0 |
| NM_205795 | Mrgprb4      | 0 |
| NM_205821 | Mrgpra6      | 0 |
| NM_206816 | Olfr128      | 0 |
| NM_206822 | Olfr10       | 0 |
| NM_206823 | Olfr153      | 0 |
| NM_206867 | Gm13280      | 0 |
| NM_206868 | Vmn1r178     | 0 |
| NM_206870 | Gm12597      | 0 |
| NM_206871 | Ifna6        | 0 |
| NM_206872 | Vmn1r177     | 0 |
| NM_206882 | Hist3h2bb-ps | 0 |
| NM_206897 | Olfr6        | 0 |
| NM_206903 | Olfr3        | 0 |
| NM_206935 | Arl9         | 0 |
| NM_206975 | Ifna14       | 0 |
| NM_207008 | Olfr773      | 0 |
| NM_207011 | Tas2r104     | 0 |
| NM_207016 | Tas2r106     | 0 |
| NM_207017 | Tas2r109     | 0 |
| NM_207018 | Tas2r113     | 0 |
| NM_207019 | Tas2r114     | 0 |
| NM_207020 | Tas2r115     | 0 |
| NM_207021 | Tas2r117     | 0 |
| NM_207022 | Tas2r118     | 0 |
| NM_207023 | Tas2r120     | 0 |
| NM_207024 | Tas2r121     | 0 |
| NM_207025 | Tas2r123     | 0 |
| NM_207026 | Tas2r124     | 0 |
| NM_207027 | Tas2r125     | 0 |
| NM_207028 | Tas2r126     | 0 |
| NM_207029 | Tas2r129     | 0 |
| NM_207030 | Tas2r131     | 0 |

|           |               |   |
|-----------|---------------|---|
| NM_207131 | Cebpe         | 0 |
| NM_207132 | 0lfr1471      | 0 |
| NM_207133 | 0lfr741       | 0 |
| NM_207134 | 0lfr1061      | 0 |
| NM_207135 | 0lfr1084      | 0 |
| NM_207136 | 0lfr1349      | 0 |
| NM_207137 | 0lfr417       | 0 |
| NM_207138 | 0lfr149       | 0 |
| NM_207139 | 0lfr936       | 0 |
| NM_207140 | 0lfr1212      | 0 |
| NM_207141 | 0lfr955       | 0 |
| NM_207143 | 0lfr594       | 0 |
| NM_207144 | 0lfr645       | 0 |
| NM_207145 | 0lfr845       | 0 |
| NM_207146 | 0lfr670       | 0 |
| NM_207147 | 0lfr813       | 0 |
| NM_207149 | 0lfr1010      | 0 |
| NM_207150 | 0lfr1313      | 0 |
| NM_207151 | 0lfr1308      | 0 |
| NM_207152 | 0lfr1338      | 0 |
| NM_207154 | 0lfr1102      | 0 |
| NM_207155 | 0lfr117       | 0 |
| NM_207156 | 0lfr747       | 0 |
| NM_207157 | 0lfr1333      | 0 |
| NM_207158 | 0lfr427       | 0 |
| NM_207159 | 0lfr814       | 0 |
| NM_207160 | 0lfr519       | 0 |
| NM_207175 | 0lfr239       | 0 |
| NM_207201 | 0lfr8         | 0 |
| NM_207224 | 0lfr384       | 0 |
| NM_207227 | 0lfr1373      | 0 |
| NM_207230 | 0lfr320       | 0 |
| NM_207235 | 0lfr358       | 0 |
| NM_207236 | 0lfr1283      | 0 |
| NM_207240 | 0lfr1320      | 0 |
| NM_207247 | Pglyrp3       | 0 |
| NM_207248 | 4930433I11Rik | 0 |
| NM_207249 | 0lfr684       | 0 |
| NM_207253 | 0lfr1371      | 0 |
| NM_207254 | 0lfr1286      | 0 |
| NM_207271 | Tdpoz3        | 0 |
| NM_207272 | Tdpoz4        | 0 |
| NM_207273 | Tdpoz5        | 0 |
| NM_207302 | Zranb1        | 0 |
| NM_207537 | Mrgprb3       | 0 |
| NM_207538 | Mrgprb5       | 0 |
| NM_207543 | Vmn1r59       | 0 |
| NM_207544 | Vmn1r64       | 0 |
| NM_207545 | Vmn1r179      | 0 |
| NM_207546 | Vmn1r181      | 0 |
| NM_207547 | Vmn1r93       | 0 |
| NM_207548 | Vmn1r174      | 0 |
| NM_207549 | 0lfr192       | 0 |
| NM_207550 | 0lfr199       | 0 |

|           |              |   |
|-----------|--------------|---|
| NM_207551 | 0lfr209      | 0 |
| NM_207552 | 0lfr250      | 0 |
| NM_207553 | 0lfr251      | 0 |
| NM_207554 | 0lfr257      | 0 |
| NM_207556 | 0lfr592      | 0 |
| NM_207557 | 0lfr681      | 0 |
| NM_207559 | 0lfr776      | 0 |
| NM_207560 | 0lfr924      | 0 |
| NM_207561 | 0lfr1040     | 0 |
| NM_207562 | 0lfr1051     | 0 |
| NM_207563 | 0lfr1057     | 0 |
| NM_207564 | 0lfr1083-ps  | 0 |
| NM_207565 | 0lfr1113     | 0 |
| NM_207566 | 0lfr1173     | 0 |
| NM_207567 | 0lfr1198     | 0 |
| NM_207568 | 0lfr1252     | 0 |
| NM_207571 | 0lfr1355     | 0 |
| NM_207572 | 0lfr1535     | 0 |
| NM_207573 | 0lfr1380     | 0 |
| NM_207574 | 0lfr1383     | 0 |
| NM_207575 | 0lfr1480     | 0 |
| NM_207619 | Vlrd19       | 0 |
| NM_207620 | 0lfr774      | 0 |
| NM_207621 | 0lfr553      | 0 |
| NM_207622 | 0lfr403      | 0 |
| NM_207626 | 0lfr1434     | 0 |
| NM_207631 | 0lfr1321     | 0 |
| NM_207632 | 0lfr1118     | 0 |
| NM_207648 | H2-Q6        | 0 |
| NM_207658 | Defa22       | 0 |
| NM_207665 | 0lfr1537-ps1 | 0 |
| NM_207666 | Dlk2         | 0 |
| NM_207673 | 0lfr100      | 0 |
| NM_207674 | 0lfr1082     | 0 |
| NM_207693 | 0lfr179      | 0 |
| NM_207694 | 0lfr220      | 0 |
| NM_207695 | 0lfr224      | 0 |
| NM_207703 | 0lfr1335     | 0 |
| NM_212436 | 0lfr301      | 0 |
| NM_212452 | Rxfp1        | 0 |
| NM_213721 | 0lfr118      | 0 |
| NM_213728 | Krt72-ps     | 0 |
| NM_213730 | Krt39        | 0 |
| NR_000040 | Tyms-ps      | 0 |
| NR_001462 | G6b          | 0 |
| NR_001581 | Speer6-ps1   | 0 |
| NR_001582 | Speer5-ps1   | 0 |
| NR_001583 | Speer9-ps1   | 0 |
| NR_001584 | Speer8-ps1   | 0 |
| NR_001585 | Speer7-ps1   | 0 |
| NR_001586 | Speer1-ps1   | 0 |
| NR_001592 | H19          | 0 |
| NR_002218 | Tpt1p        | 0 |
| NR_002687 | Gm5424       | 0 |

|           |               |   |
|-----------|---------------|---|
| NR_002690 | LOC654426     | 0 |
| NR_002702 | Npm3-ps1      | 0 |
| NR_002840 | Gas5          | 0 |
| NR_002841 | Rn4.5s        | 0 |
| NR_002844 | Tsix          | 0 |
| NR_002848 | 6430411K18Rik | 0 |
| NR_002851 | Snord82       | 0 |
| NR_002853 | Airn          | 0 |
| NR_002855 | Igf2as        | 0 |
| NR_002857 | Psg-ps1       | 0 |
| NR_002860 | A130040M12Rik | 0 |
| NR_002861 | Serpina4-ps1  | 0 |
| NR_002862 | Gm5088        | 0 |
| NR_002869 | Gm5477        | 0 |
| NR_002870 | Dnm3os        | 0 |
| NR_002872 | Gm6042        | 0 |
| NR_002874 | Has2as        | 0 |
| NR_002875 | Gm1821        | 0 |
| NR_002878 | Defa-ps12     | 0 |
| NR_002881 | Defa-ps13     | 0 |
| NR_002883 | Gm5643        | 0 |
| NR_002885 | Gm10052       | 0 |
| NR_002888 | Vmn2r-ps14    | 0 |
| NR_002890 | Gm12070       | 0 |
| NR_002895 | Snord116      | 0 |
| NR_002896 | Snhg1         | 0 |
| NR_002897 | Snora64       | 0 |
| NR_002898 | Snora65       | 0 |
| NR_002899 | Snora70       | 0 |
| NR_002902 | Snora62       | 0 |
| NR_002905 | Snora74a      | 0 |
| NR_003107 | Gm9731        | 0 |
| NR_003146 | Defa-ps1      | 0 |
| NR_003185 | Sprr2j-ps     | 0 |
| NR_003243 | Fatel         | 0 |
| NR_003282 | Gm11194       | 0 |
| NR_003293 | D030028A08Rik | 0 |
| NR_003364 | BC018473      | 0 |
| NR_003368 | Pvt1          | 0 |
| NR_003373 | Gm15772       | 0 |
| NR_003376 | Gm7367        | 0 |
| NR_003492 | 2210409E12Rik | 0 |
| NR_003517 | Pisd-ps1      | 0 |
| NR_003548 | Sprr2g        | 0 |
| NR_003596 | Gm6455        | 0 |
| NR_003620 | E330021D16Rik | 0 |
| NR_003622 | Gm5065        | 0 |
| NR_003624 | Gm10319       | 0 |
| NR_003625 | 1700073E17Rik | 0 |
| NR_003627 | D030018L15Rik | 0 |
| NR_003628 | Gm5766        | 0 |
| NR_003630 | Gm6498        | 0 |
| NR_003632 | Gm6787        | 0 |
| NR_003633 | Meg3          | 0 |

|           |               |   |
|-----------|---------------|---|
| NR_003634 | Rps4y2        | 0 |
| NR_003639 | 1700013N18Rik | 0 |
| NR_003640 | 1700045I19Rik | 0 |
| NR_003645 | Ube2dn1       | 0 |
| NR_003646 | 4921511C20Rik | 0 |
| NR_003648 | Gm5334        | 0 |
| NR_003649 | Gm5434        | 0 |
| NR_003652 | Gm7337        | 0 |
| NR_003681 | Snora15       | 0 |
| NR_003953 | 1700022A21Rik | 0 |
| NR_003959 | Aldoart2      | 0 |
| NR_004417 | Snord73a      | 0 |
| NR_004432 | Rnu12         | 0 |
| NR_004433 | Gm8234        | 0 |
| NR_004434 | Rpr11         | 0 |
| NR_004438 | Apoo-ps       | 0 |
| NR_004439 | Rpr12         | 0 |
| NR_004441 | Gprc2a-rs5    | 0 |
| NR_004444 | Zfhx2as       | 0 |
| NR_004445 | Snord22       | 0 |
| NR_004853 | Cdk3-ps       | 0 |
| NR_006883 | Rhox3-ps      | 0 |
| NR_015347 | Gm4850        | 0 |
| NR_015348 | Hoxa11as      | 0 |
| NR_015349 | Etohd2        | 0 |
| NR_015372 | Gm12166       | 0 |
| NR_015455 | BC064078      | 0 |
| NR_015457 | B430010I23Rik | 0 |
| NR_015458 | 1700047M11Rik | 0 |
| NR_015464 | A330069E16Rik | 0 |
| NR_015465 | C920009B18Rik | 0 |
| NR_015468 | 2900079G21Rik | 0 |
| NR_015469 | 2810442I21Rik | 0 |
| NR_015471 | 3830408C21Rik | 0 |
| NR_015472 | 9530082P21Rik | 0 |
| NR_015473 | 1700020I14Rik | 0 |
| NR_015474 | Gm14047       | 0 |
| NR_015477 | 2310050B05Rik | 0 |
| NR_015481 | D430019H16Rik | 0 |
| NR_015483 | 2610203C20Rik | 0 |
| NR_015485 | 1700108F19Rik | 0 |
| NR_015486 | D130017N08Rik | 0 |
| NR_015489 | 2900041M22Rik | 0 |
| NR_015493 | 2810403D21Rik | 0 |
| NR_015495 | A230056P14Rik | 0 |
| NR_015496 | 1700031M16Rik | 0 |
| NR_015499 | C030034L19Rik | 0 |
| NR_015500 | A530013C23Rik | 0 |
| NR_015502 | E030003E18Rik | 0 |
| NR_015507 | C130036L24Rik | 0 |
| NR_015508 | Enox          | 0 |
| NR_015519 | AI662270      | 0 |
| NR_015522 | 2810429I04Rik | 0 |
| NR_015527 | 4930417013Rik | 0 |



|           |               |   |
|-----------|---------------|---|
| NR_015530 | 9530026P05Rik | 0 |
| NR_015531 | 2700023E23Rik | 0 |
| NR_015535 | 4930567H12Rik | 0 |
| NR_015537 | 9230114K14Rik | 0 |
| NR_015538 | Gm2518        | 0 |
| NR_015543 | 2810055G20Rik | 0 |
| NR_015545 | 4930481A15Rik | 0 |
| NR_015546 | C130026L21Rik | 0 |
| NR_015547 | 1700009J07Rik | 0 |
| NR_015551 | 1700012B15Rik | 0 |
| NR_015553 | 9430076C15Rik | 0 |
| NR_015555 | 4933404012Rik | 0 |
| NR_015557 | F730016J06Rik | 0 |
| NR_015558 | 5031425F14Rik | 0 |
| NR_015561 | C130071C03Rik | 0 |
| NR_015562 | 9530036011Rik | 0 |
| NR_015566 | A330023F24Rik | 0 |
| NR_015568 | 4933406F09Rik | 0 |
| NR_015569 | 4732471J01Rik | 0 |
| NR_015570 | LOC624853     | 0 |
| NR_015571 | 4930471G03Rik | 0 |
| NR_015572 | 1810014B01Rik | 0 |
| NR_015574 | 4930513N10Rik | 0 |
| NR_015577 | 2210015D19Rik | 0 |
| NR_015579 | 2810032G03Rik | 0 |
| NR_015580 | Sox2ot        | 0 |
| NR_015581 | 5430402013Rik | 0 |
| NR_015582 | C330024D21Rik | 0 |
| NR_015583 | BC024386      | 0 |
| NR_015585 | 4933439C10Rik | 0 |
| NR_015587 | 9330111N05Rik | 0 |
| NR_015593 | D130009I18Rik | 0 |
| NR_015595 | 2410137F16Rik | 0 |
| NR_015601 | C030044B11Rik | 0 |
| NR_015603 | 4930483J18Rik | 0 |
| NR_015604 | E130112N10Rik | 0 |
| NR_015605 | 2900052N01Rik | 0 |
| NR_015608 | 1810058I24Rik | 0 |
| NR_015610 | 9530059014Rik | 0 |
| NR_015611 | 2700086A05Rik | 0 |
| NR_015613 | 1700029M20Rik | 0 |
| NR_015614 | E230029C05Rik | 0 |
| NR_015615 | 4732416N19Rik | 0 |
| NR_015618 | A930015D03Rik | 0 |
| NR_023846 | Apeg3         | 0 |
| NR_024051 | Abca16        | 0 |
| NR_024069 | 2010107H07Rik | 0 |
| NR_024200 | Rnu1b2        | 0 |
| NR_024208 | Sycp1-ps1     | 0 |
| NR_024257 | 4930412013Rik | 0 |
| NR_024323 | 4930426L09Rik | 0 |
| NR_024324 | E130201H02Rik | 0 |
| NR_024325 | 9130024F11Rik | 0 |
| NR_024720 | 2700099C18Rik | 0 |

|           |               |   |
|-----------|---------------|---|
| NR_026561 | Gm8884        | 0 |
| NR_026733 | 3110039M20Rik | 0 |
| NR_026741 | LOC100270707  | 0 |
| NR_026831 | Krtap12-4     | 0 |
| NR_026848 | C030034I22Rik | 0 |
| NR_026853 | A930012L18Rik | 0 |
| NR_026942 | E330013P04Rik | 0 |
| NR_026990 | Gm5577        | 0 |
| NR_027059 | 2810008D09Rik | 0 |
| NR_027137 | Gm10565       | 0 |
| NR_027236 | AI854703      | 0 |
| NR_027289 | Uck11os       | 0 |
| NR_027298 | A230020J21Rik | 0 |
| NR_027359 | 5930416I19Rik | 0 |
| NR_027376 | Gm5468        | 0 |
| NR_027377 | LOC100045653  | 0 |
| NR_027380 | Gm3219        | 0 |
| NR_027388 | 1700096K18Rik | 0 |
| NR_027445 | A230072C01Rik | 0 |
| NR_027452 | LOC100272221  | 0 |
| NR_027619 | Mug-ps1       | 0 |
| NR_027637 | Gm4489        | 0 |
| NR_027656 | Gm9786        | 0 |
| NR_027658 | Gm8883        | 0 |
| NR_027707 | Gm5166        | 0 |
| NR_027801 | Gm1141        | 0 |
| NR_027802 | Mtag2         | 0 |
| NR_027803 | D6Ert474e     | 0 |
| NR_027805 | A430093F15Rik | 0 |
| NR_027806 | Pea15b        | 0 |
| NR_027808 | Zfp862        | 0 |
| NR_027813 | Zp4-ps        | 0 |
| NR_027819 | 1810032008Rik | 0 |
| NR_027824 | Gm13749       | 0 |
| NR_027827 | A030009H04Rik | 0 |
| NR_027829 | Gm10638       | 0 |
| NR_027831 | 2810002D19Rik | 0 |
| NR_027846 | D630029K05Rik | 0 |
| NR_027851 | 2900005J15Rik | 0 |
| NR_027860 | Gm9199        | 0 |
| NR_027865 | 1700054K19Rik | 0 |
| NR_027874 | 0610040B10Rik | 0 |
| NR_027879 | 4930583K01Rik | 0 |
| NR_027883 | 1700096J18Rik | 0 |
| NR_027885 | Vaultrc5      | 0 |
| NR_027891 | 2900092D14Rik | 0 |
| NR_027907 | AI414108      | 0 |
| NR_027913 | G630025P09Rik | 0 |
| NR_027920 | Msx1as        | 0 |
| NR_027923 | C630043F03Rik | 0 |
| NR_027926 | 4930507D05Rik | 0 |
| NR_027958 | D930048N14Rik | 0 |
| NR_027959 | B830017H08Rik | 0 |
| NR_027963 | Zfp783        | 0 |

|           |               |   |
|-----------|---------------|---|
| NR_027966 | 4930429B21Rik | 0 |
| NR_027968 | 1700020N01Rik | 0 |
| NR_027969 | 4930441014Rik | 0 |
| NR_027971 | 2610204G22Rik | 0 |
| NR_027975 | Gm5607        | 0 |
| NR_027978 | 4930465K10Rik | 0 |
| NR_027984 | 2810025M15Rik | 0 |
| NR_027985 | 4632415L05Rik | 0 |
| NR_027987 | C030016D13Rik | 0 |
| NR_027989 | Gm9871        | 0 |
| NR_028030 | Gm9767        | 0 |
| NR_028079 | Snora3        | 0 |
| NR_028086 | Ncrna00086    | 0 |
| NR_028091 | Snord72       | 0 |
| NR_028107 | 1700058G18Rik | 0 |
| NR_028113 | 0610039K10Rik | 0 |
| NR_028122 | 2310001K24Rik | 0 |
| NR_028123 | 1600029I14Rik | 0 |
| NR_028125 | 0610038B21Rik | 0 |
| NR_028126 | 6330407A03Rik | 0 |
| NR_028128 | Snord68       | 0 |
| NR_028129 | LOC100302567  | 0 |
| NR_028261 | Rian          | 0 |
| NR_028263 | B130006D01Rik | 0 |
| NR_028265 | Mirg          | 0 |
| NR_028271 | Phxr4         | 0 |
| NR_028278 | Gm8801        | 0 |
| NR_028283 | LOC100302626  | 0 |
| NR_028285 | 2210417A02Rik | 0 |
| NR_028286 | 1700026D11Rik | 0 |
| NR_028306 | Tmem181d-ps   | 0 |
| NR_028310 | 4930503E24Rik | 0 |
| NR_028311 | Gm4371        | 0 |
| NR_028317 | 8430429K09Rik | 0 |
| NR_028320 | AU015836      | 0 |
| NR_028329 | D630032N06Rik | 0 |
| NR_028359 | 5830417I10Rik | 0 |
| NR_028360 | 1700018L02Rik | 0 |
| NR_028362 | Snord7        | 0 |
| NR_028363 | AA465934      | 0 |
| NR_028364 | AI450353      | 0 |
| NR_028368 | 4930404I05Rik | 0 |
| NR_028378 | LOC100034739  | 0 |
| NR_028382 | B230319C09Rik | 0 |
| NR_028405 | Marcksl1-ps4  | 0 |
| NR_028422 | C130080G10Rik | 0 |
| NR_028423 | A530058N18Rik | 0 |
| NR_028425 | LOC100303645  | 0 |
| NR_028429 | Thap6         | 0 |
| NR_028430 | BC052688      | 0 |
| NR_028432 | 2210013021Rik | 0 |
| NR_028433 | AF357355      | 0 |
| NR_028434 | AF357359      | 0 |
| NR_028438 | 9230102K24Rik | 0 |

|           |               |   |
|-----------|---------------|---|
| NR_028442 | 9330020H09Rik | 0 |
| NR_028446 | Snora35       | 0 |
| NR_028479 | Snora20       | 0 |
| NR_028480 | Gm12238       | 0 |
| NR_028481 | Snora31       | 0 |
| NR_028497 | Gm13315       | 0 |
| NR_028518 | Scarna3a      | 0 |
| NR_028519 | Scarna6       | 0 |
| NR_028520 | Gm10451       | 0 |
| NR_028521 | Snord11       | 0 |
| NR_028524 | Snord38a      | 0 |
| NR_028526 | Snord49b      | 0 |
| NR_028528 | Snord57       | 0 |
| NR_028529 | Snord64       | 0 |
| NR_028530 | Snord66       | 0 |
| NR_028532 | Snord71       | 0 |
| NR_028533 | Snord88a      | 0 |
| NR_028534 | Snord88c      | 0 |
| NR_028536 | Snord93       | 0 |
| NR_028537 | Snord99       | 0 |
| NR_028538 | Scarna2       | 0 |
| NR_028539 | Snord23       | 0 |
| NR_028540 | Snord12       | 0 |
| NR_028541 | Snord65       | 0 |
| NR_028543 | Snord47       | 0 |
| NR_028547 | Snord110      | 0 |
| NR_028548 | Snord16a      | 0 |
| NR_028549 | Snord37       | 0 |
| NR_028550 | Snord49a      | 0 |
| NR_028551 | Snord53       | 0 |
| NR_028552 | Snord58b      | 0 |
| NR_028553 | Snord67       | 0 |
| NR_028554 | Snord70       | 0 |
| NR_028556 | Snord92       | 0 |
| NR_028558 | Snora41       | 0 |
| NR_028560 | Scarna17      | 0 |
| NR_028561 | Snord45b      | 0 |
| NR_028562 | Snord91a      | 0 |
| NR_028563 | Snord96a      | 0 |
| NR_028564 | Snord95       | 0 |
| NR_028565 | Snord85       | 0 |
| NR_028567 | Snord1b       | 0 |
| NR_028569 | Snord1c       | 0 |
| NR_028570 | Snord1a       | 0 |
| NR_028577 | D030025P21Rik | 0 |
| NR_028578 | Gm10584       | 0 |
| NR_028580 | Gm10825       | 0 |
| NR_028592 | Gm10069       | 0 |
| NR_029382 | Mir17hg       | 0 |
| NR_029384 | Otx2osl       | 0 |
| NR_029412 | Snora16a      | 0 |
| NR_029414 | Gsdmc1-ps     | 0 |
| NR_029432 | 1500015A07Rik | 0 |
| NR_029440 | 2010320M18Rik | 0 |

|           |               |   |
|-----------|---------------|---|
| NR_029441 | 2810454H06Rik | 0 |
| NR_029456 | A330050B17Rik | 0 |
| NR_029458 | A530088E08Rik | 0 |
| NR_029465 | Gm11149       | 0 |
| NR_029468 | Snhg12        | 0 |
| NR_029469 | D4Ertd617e    | 0 |
| NR_029470 | Gm10863       | 0 |
| NR_029473 | 4930524L23Rik | 0 |
| NR_029475 | 4930581F22Rik | 0 |
| NR_029526 | Mirlet7g      | 0 |
| NR_029528 | Mir1-1        | 0 |
| NR_029529 | Mir15b        | 0 |
| NR_029530 | Mir23b        | 0 |
| NR_029531 | Mir27b        | 0 |
| NR_029533 | Mir30a        | 0 |
| NR_029535 | Mir99a        | 0 |
| NR_029536 | Mir99b        | 0 |
| NR_029538 | Mir124a-3     | 0 |
| NR_029539 | Mir125a       | 0 |
| NR_029540 | Mir125b-2     | 0 |
| NR_029541 | Mir126        | 0 |
| NR_029542 | Mir127        | 0 |
| NR_029543 | Mir128-1      | 0 |
| NR_029545 | Mir9-2        | 0 |
| NR_029546 | Mir132        | 0 |
| NR_029547 | Mir133a-1     | 0 |
| NR_029548 | Mir134        | 0 |
| NR_029549 | Mir135a-1     | 0 |
| NR_029550 | Mir136        | 0 |
| NR_029551 | Mir137        | 0 |
| NR_029552 | Mir138-2      | 0 |
| NR_029553 | Mir140        | 0 |
| NR_029555 | Mir142        | 0 |
| NR_029556 | Mir144        | 0 |
| NR_029559 | Mir149        | 0 |
| NR_029560 | Mir150        | 0 |
| NR_029562 | Mir152        | 0 |
| NR_029563 | Mir153        | 0 |
| NR_029564 | Mir154        | 0 |
| NR_029565 | Mir155        | 0 |
| NR_029566 | Mir10b        | 0 |
| NR_029567 | Mir129-1      | 0 |
| NR_029568 | Mir181a-2     | 0 |
| NR_029570 | Mir184        | 0 |
| NR_029572 | Mir186        | 0 |
| NR_029573 | Mir187        | 0 |
| NR_029574 | Mir188        | 0 |
| NR_029575 | Mir24-1       | 0 |
| NR_029577 | Mir191        | 0 |
| NR_029579 | Mir193        | 0 |
| NR_029580 | Mir194-1      | 0 |
| NR_029581 | Mir195        | 0 |
| NR_029585 | Mir199a-1     | 0 |
| NR_029587 | Mir200b       | 0 |

|           |            |   |
|-----------|------------|---|
| NR_029590 | Mir203     | 0 |
| NR_029591 | Mir204     | 0 |
| NR_029593 | Mir206     | 0 |
| NR_029594 | Mir207     | 0 |
| NR_029600 | Mir122a    | 0 |
| NR_029640 | Mir290     | 0 |
| NR_029641 | Mir291a    | 0 |
| NR_029642 | Mir292     | 0 |
| NR_029643 | Mir293     | 0 |
| NR_029644 | Mir294     | 0 |
| NR_029645 | Mir295     | 0 |
| NR_029646 | Mir296     | 0 |
| NR_029650 | Mir299     | 0 |
| NR_029651 | Mir300     | 0 |
| NR_029652 | Mir301     | 0 |
| NR_029653 | Mir302a    | 0 |
| NR_029655 | Mir34b     | 0 |
| NR_029715 | Mir19b-2   | 0 |
| NR_029717 | Mir30c-2   | 0 |
| NR_029720 | Mir192     | 0 |
| NR_029721 | Mir196a-1  | 0 |
| NR_029722 | Mir196a-2  | 0 |
| NR_029725 | Mirlet7a-1 | 0 |
| NR_029726 | Mirlet7a-2 | 0 |
| NR_029727 | Mirlet7b   | 0 |
| NR_029728 | Mirlet7c-1 | 0 |
| NR_029729 | Mirlet7c-2 | 0 |
| NR_029730 | Mirlet7e   | 0 |
| NR_029732 | Mirlet7f-2 | 0 |
| NR_029735 | Mir16-2    | 0 |
| NR_029736 | Mir18      | 0 |
| NR_029737 | Mir20a     | 0 |
| NR_029739 | Mir22      | 0 |
| NR_029740 | Mir23a     | 0 |
| NR_029741 | Mir24-2    | 0 |
| NR_029742 | Mir26a-1   | 0 |
| NR_029743 | Mir26b     | 0 |
| NR_029745 | Mir29c     | 0 |
| NR_029746 | Mir27a     | 0 |
| NR_029751 | Mir34a     | 0 |
| NR_029753 | Mir98      | 0 |
| NR_029754 | Mir103-1   | 0 |
| NR_029755 | Mir103-2   | 0 |
| NR_029757 | Mir323     | 0 |
| NR_029758 | Mir324     | 0 |
| NR_029760 | Mir326     | 0 |
| NR_029761 | Mir328     | 0 |
| NR_029762 | Mir329     | 0 |
| NR_029763 | Mir330     | 0 |
| NR_029765 | Mir337     | 0 |
| NR_029766 | Mir148b    | 0 |
| NR_029768 | Mir339     | 0 |
| NR_029769 | Mir340     | 0 |
| NR_029770 | Mir341     | 0 |

|           |           |   |
|-----------|-----------|---|
| NR_029772 | Mir344    | 0 |
| NR_029773 | Mir345    | 0 |
| NR_029774 | Mir346    | 0 |
| NR_029775 | Mir350    | 0 |
| NR_029777 | Mir135b   | 0 |
| NR_029778 | Mir101b   | 0 |
| NR_029781 | Mir1-2    | 0 |
| NR_029784 | Mir10a    | 0 |
| NR_029785 | Mir17     | 0 |
| NR_029786 | Mir19a    | 0 |
| NR_029790 | Mir100    | 0 |
| NR_029791 | Mir139    | 0 |
| NR_029792 | Mir200c   | 0 |
| NR_029793 | Mir210    | 0 |
| NR_029794 | Mir212    | 0 |
| NR_029795 | Mir181a-1 | 0 |
| NR_029796 | Mir214    | 0 |
| NR_029797 | Mir216a   | 0 |
| NR_029798 | Mir218-1  | 0 |
| NR_029799 | Mir218-2  | 0 |
| NR_029801 | Mir223    | 0 |
| NR_029802 | Mir320    | 0 |
| NR_029803 | Mir26a-2  | 0 |
| NR_029804 | Mir33     | 0 |
| NR_029805 | Mir211    | 0 |
| NR_029809 | Mir29b-2  | 0 |
| NR_029810 | Mir199a-2 | 0 |
| NR_029811 | Mir199b   | 0 |
| NR_029812 | Mir135a-2 | 0 |
| NR_029813 | Mir124a-1 | 0 |
| NR_029814 | Mir124a-2 | 0 |
| NR_029815 | Mir19b-1  | 0 |
| NR_029816 | Mir92-1   | 0 |
| NR_029817 | Mir9-1    | 0 |
| NR_029818 | Mir9-3    | 0 |
| NR_029819 | Mir138-1  | 0 |
| NR_029820 | Mir181b-1 | 0 |
| NR_029822 | Mir125b-1 | 0 |
| NR_029823 | Mir128-2  | 0 |
| NR_029826 | Mir7-2    | 0 |
| NR_029827 | Mir7b     | 0 |
| NR_029828 | Mir217    | 0 |
| NR_029830 | Mir194-2  | 0 |
| NR_029855 | Mir365-1  | 0 |
| NR_029876 | Mir375    | 0 |
| NR_029877 | Mir376a   | 0 |
| NR_029878 | Mir377    | 0 |
| NR_029880 | Mir379    | 0 |
| NR_029881 | Mir380    | 0 |
| NR_029882 | Mir381    | 0 |
| NR_029883 | Mir382    | 0 |
| NR_029900 | Mir335    | 0 |
| NR_029901 | Mir133a-2 | 0 |
| NR_029902 | Mir133b   | 0 |

|           |           |   |
|-----------|-----------|---|
| NR_029904 | Mir181b-2 | 0 |
| NR_029908 | Mir215    | 0 |
| NR_029913 | Mir409    | 0 |
| NR_029914 | Mir410    | 0 |
| NR_029915 | Mir376b   | 0 |
| NR_029916 | Mir411    | 0 |
| NR_029917 | Mir412    | 0 |
| NR_029918 | Mir370    | 0 |
| NR_029947 | Mir425    | 0 |
| NR_029951 | Mir431    | 0 |
| NR_029952 | Mir433    | 0 |
| NR_029953 | Mir434    | 0 |
| NR_029956 | Mir448    | 0 |
| NR_029959 | Mir365-2  | 0 |
| NR_029961 | Mir449a   | 0 |
| NR_029971 | Mir451    | 0 |
| NR_030148 | Mir464    | 0 |
| NR_030150 | Mir466    | 0 |
| NR_030152 | Mir469    | 0 |
| NR_030153 | Mir470    | 0 |
| NR_030252 | Mir484    | 0 |
| NR_030253 | Mir485    | 0 |
| NR_030254 | Mir486    | 0 |
| NR_030259 | Mir546    | 0 |
| NR_030260 | Mir540    | 0 |
| NR_030261 | Mir543    | 0 |
| NR_030262 | Mir539    | 0 |
| NR_030263 | Mir541    | 0 |
| NR_030268 | Mir367    | 0 |
| NR_030269 | Mir494    | 0 |
| NR_030270 | Mir376c   | 0 |
| NR_030271 | Mir487b   | 0 |
| NR_030272 | Mir369    | 0 |
| NR_030276 | Mir291b   | 0 |
| NR_030403 | Mir302b   | 0 |
| NR_030404 | Mir302c   | 0 |
| NR_030405 | Mir302d   | 0 |
| NR_030419 | Mir216b   | 0 |
| NR_030421 | Mir758    | 0 |
| NR_030422 | Mir551b   | 0 |
| NR_030423 | Mir671    | 0 |
| NR_030424 | Mir668    | 0 |
| NR_030425 | Mir665    | 0 |
| NR_030426 | Mir667    | 0 |
| NR_030427 | Mir770    | 0 |
| NR_030428 | Mir762    | 0 |
| NR_030429 | Mir802    | 0 |
| NR_030430 | Mir672    | 0 |
| NR_030432 | Mir761    | 0 |
| NR_030433 | Mir764    | 0 |
| NR_030435 | Mir666    | 0 |
| NR_030436 | Mir759    | 0 |
| NR_030437 | Mir496    | 0 |
| NR_030438 | Mir673    | 0 |



|           |           |   |
|-----------|-----------|---|
| NR_030440 | Mir674    | 0 |
| NR_030441 | Mir488    | 0 |
| NR_030442 | Mir677    | 0 |
| NR_030443 | Mir678    | 0 |
| NR_030444 | Mir497    | 0 |
| NR_030445 | Mir679    | 0 |
| NR_030446 | Mir495    | 0 |
| NR_030447 | Mir680-1  | 0 |
| NR_030449 | Mir680-3  | 0 |
| NR_030451 | Mir682    | 0 |
| NR_030452 | Mir449c   | 0 |
| NR_030454 | Mir684-1  | 0 |
| NR_030455 | Mir684-2  | 0 |
| NR_030457 | Mir686    | 0 |
| NR_030466 | Mir693    | 0 |
| NR_030468 | Mir146b   | 0 |
| NR_030469 | Mir669b   | 0 |
| NR_030470 | Mir669a-2 | 0 |
| NR_030471 | Mir669a-3 | 0 |
| NR_030472 | Mir467b   | 0 |
| NR_030473 | Mir669c   | 0 |
| NR_030474 | Mir297b   | 0 |
| NR_030475 | Mir695    | 0 |
| NR_030476 | Mir720    | 0 |
| NR_030477 | Mir455    | 0 |
| NR_030478 | Mir491    | 0 |
| NR_030479 | Mir697    | 0 |
| NR_030480 | Mir698    | 0 |
| NR_030482 | Mir701    | 0 |
| NR_030483 | Mir702    | 0 |
| NR_030488 | Mir707    | 0 |
| NR_030489 | Mir708    | 0 |
| NR_030490 | Mir709    | 0 |
| NR_030492 | Mir711    | 0 |
| NR_030493 | Mir713    | 0 |
| NR_030494 | Mir715    | 0 |
| NR_030524 | Mir490    | 0 |
| NR_030525 | Mir676    | 0 |
| NR_030526 | Mir615    | 0 |
| NR_030534 | Mir181d   | 0 |
| NR_030537 | Mir879    | 0 |
| NR_030540 | Mir882    | 0 |
| NR_030543 | Mir190b   | 0 |
| NR_030547 | Mir147    | 0 |
| NR_030549 | Mir193b   | 0 |
| NR_030551 | Mir297a-3 | 0 |
| NR_030555 | Mir297c   | 0 |
| NR_030559 | Mir453    | 0 |
| NR_030569 | Mir466g   | 0 |
| NR_030572 | Mir467d   | 0 |
| NR_030573 | Mir493    | 0 |
| NR_030574 | Mir504    | 0 |
| NR_030576 | Mir568    | 0 |
| NR_030577 | Mir574    | 0 |

|           |               |   |
|-----------|---------------|---|
| NR_030578 | Mir654        | 0 |
| NR_030602 | Mir449b       | 0 |
| NR_030604 | Mir872        | 0 |
| NR_030609 | Mir511        | 0 |
| NR_030611 | Mir598        | 0 |
| NR_030644 | Mir582        | 0 |
| NR_030671 | AW011738      | 0 |
| NR_030673 | D930016D06Rik | 0 |
| NR_030677 | BC025920      | 0 |
| NR_030678 | AA387883      | 0 |
| NR_030680 | Gm3833        | 0 |
| NR_030681 | Gm4598        | 0 |
| NR_030693 | 4930412C18Rik | 0 |
| NR_030695 | B330016D10Rik | 0 |
| NR_030696 | 9930014A18Rik | 0 |
| NR_030698 | A630066F11Rik | 0 |
| NR_030699 | A630072M18Rik | 0 |
| NR_030700 | 4831440E17Rik | 0 |
| NR_030702 | Snord4a       | 0 |
| NR_030703 | Snord104      | 0 |
| NR_030705 | Snord2        | 0 |
| NR_030706 | C230004F18Rik | 0 |
| NR_030711 | 2210403K04Rik | 0 |
| NR_030716 | 5430417L22Rik | 0 |
| NR_030718 | F630028010Rik | 0 |
| NR_030721 | 9130206I24Rik | 0 |
| NR_030733 | 1700086L19Rik | 0 |
| NR_030738 | 2410006H16Rik | 0 |
| NR_030757 | Mir499        | 0 |
| NR_030758 | Mir718        | 0 |
| NR_030759 | Mir343        | 0 |
| NR_030763 | Smok4a        | 0 |
| NR_030769 | Nkx2-2as      | 0 |
| NR_030771 | Gm13034       | 0 |
| NR_030776 | 3110021A11Rik | 0 |
| NR_031758 | Snora26       | 0 |
| NR_033117 | Gm3020        | 0 |
| NR_033120 | Klklb7-ps     | 0 |
| NR_033121 | Gm8348        | 0 |
| NR_033138 | Gm833         | 0 |
| NR_033146 | LOC100316870  | 0 |
| NR_033147 | D830046C22Rik | 0 |
| NR_033148 | Lrch4-sap25   | 0 |
| NR_033168 | Snora28       | 0 |
| NR_033197 | 4933427E11Rik | 0 |
| NR_033198 | 2700046G09Rik | 0 |
| NR_033199 | 1700001G17Rik | 0 |
| NR_033220 | BC039771      | 0 |
| NR_033222 | 9330151L19Rik | 0 |
| NR_033224 | D330050I16Rik | 0 |
| NR_033225 | Gm13375       | 0 |
| NR_033228 | E030024N20Rik | 0 |
| NR_033229 | A230073K19Rik | 0 |
| NR_033299 | 9530091C08Rik | 0 |

|           |               |   |
|-----------|---------------|---|
| NR_033301 | Gm5627        | 0 |
| NR_033305 | AA388235      | 0 |
| NR_033324 | BC065397      | 0 |
| NR_033336 | Snora23       | 0 |
| NR_033340 | B930059L03Rik | 0 |
| NR_033355 | 5430416009Rik | 0 |
| NR_033388 | Gm3002        | 0 |
| NR_033398 | Gm9159        | 0 |
| NR_033430 | Gm2694        | 0 |
| NR_033450 | Serpina3h     | 0 |
| NR_033453 | 9130209A04Rik | 0 |
| NR_033454 | Gm5095        | 0 |
| NR_033455 | Gm10536       | 0 |
| NR_033456 | Gm4710        | 0 |
| NR_033457 | Gm6225        | 0 |
| NR_033458 | Gm10512       | 0 |
| NR_033459 | LOC668917     | 0 |
| NR_033461 | Gm9999        | 0 |
| NR_033467 | Gm11468       | 0 |
| NR_033468 | AU019990      | 0 |
| NR_033470 | Gm10857       | 0 |
| NR_033472 | Gm10768       | 0 |
| NR_033475 | Gm10823       | 0 |
| NR_033476 | Gm10789       | 0 |
| NR_033484 | Gm10046       | 0 |
| NR_033485 | 4933403003Rik | 0 |
| NR_033490 | 2610100L16Rik | 0 |
| NR_033492 | 4931406H21Rik | 0 |
| NR_033495 | Gm13629       | 0 |
| NR_033497 | D830015G02Rik | 0 |
| NR_033498 | AI504432      | 0 |
| NR_033499 | Gm8773        | 0 |
| NR_033501 | Gm7271        | 0 |
| NR_033502 | C030023E24Rik | 0 |
| NR_033504 | Gm9962        | 0 |
| NR_033505 | Gm14164       | 0 |
| NR_033506 | Gm3893        | 0 |
| NR_033509 | Gm9961        | 0 |
| NR_033513 | Gm6793        | 0 |
| NR_033517 | 2410017I17Rik | 0 |
| NR_033518 | Gm16039       | 0 |
| NR_033522 | 1600029015Rik | 0 |
| NR_033529 | Gm7444        | 0 |
| NR_033533 | Gm12603       | 0 |
| NR_033534 | 0lfr1300-ps1  | 0 |
| NR_033536 | Gm10516       | 0 |
| NR_033540 | F630042J09Rik | 0 |
| NR_033541 | Gm10389       | 0 |
| NR_033545 | Gm10790       | 0 |
| NR_033553 | 1700048020Rik | 0 |
| NR_033555 | Gm10400       | 0 |
| NR_033556 | A630010A05Rik | 0 |
| NR_033558 | F830002L21Rik | 0 |
| NR_033561 | 2900002K06Rik | 0 |

|           |               |   |
|-----------|---------------|---|
| NR_033562 | Gm1995        | 0 |
| NR_033563 | Gpx2-ps1      | 0 |
| NR_033565 | BB019430      | 0 |
| NR_033566 | AI507597      | 0 |
| NR_033567 | E130304I02Rik | 0 |
| NR_033569 | 9430021M05Rik | 0 |
| NR_033571 | 1810062018Rik | 0 |
| NR_033573 | 4930512B01Rik | 0 |
| NR_033574 | Nutf2-ps1     | 0 |
| NR_033576 | Usp-ps        | 0 |
| NR_033577 | Gm8221        | 0 |
| NR_033578 | Gm15645       | 0 |
| NR_033580 | 4933401B06Rik | 0 |
| NR_033581 | Adh6-ps1      | 0 |
| NR_033582 | Gm11426       | 0 |
| NR_033584 | Gm10280       | 0 |
| NR_033589 | Hmgb1-rs17    | 0 |
| NR_033591 | Gm6300        | 0 |
| NR_033592 | 4933417G07Rik | 0 |
| NR_033593 | 4930529C04Rik | 0 |
| NR_033594 | Gm5712        | 0 |
| NR_033595 | Gm13498       | 0 |
| NR_033596 | 5730416F02Rik | 0 |
| NR_033597 | Gm7134        | 0 |
| NR_033598 | 4930503H13Rik | 0 |
| NR_033599 | Gm6682        | 0 |
| NR_033600 | 5033404E19Rik | 0 |
| NR_033602 | Gm5779        | 0 |
| NR_033603 | Gm5176        | 0 |
| NR_033605 | 1700028B04Rik | 0 |
| NR_033609 | A930017M01Rik | 0 |
| NR_033611 | Gm12669       | 0 |
| NR_033612 | Gm13238       | 0 |
| NR_033613 | 1700001J11Rik | 0 |
| NR_033614 | Cyp2c53-ps    | 0 |
| NR_033617 | Gm12830       | 0 |
| NR_033618 | 1700128F08Rik | 0 |
| NR_033619 | Gm6623        | 0 |
| NR_033624 | 5031434011Rik | 0 |
| NR_033625 | D5Ert605e     | 0 |
| NR_033630 | Gm5177        | 0 |
| NR_033631 | 4632428C04Rik | 0 |
| NR_033636 | 1700049E15Rik | 0 |
| NR_033637 | Gm4349        | 0 |
| NR_033640 | E330012B07Rik | 0 |
| NR_033644 | Fut4-ps1      | 0 |
| NR_033648 | Vmn2r-ps129   | 0 |
| NR_033653 | Kif4b         | 0 |
| NR_033692 | Vlrg10        | 0 |
| NR_033693 | Gm4541        | 0 |
| NR_033726 | Ces2d-ps      | 0 |
| NR_033729 | 5730577I03Rik | 0 |
| NR_033731 | 1700023I07Rik | 0 |
| NR_033778 | Snord11611    | 0 |

|           |               |   |
|-----------|---------------|---|
| NR_033779 | Snord11612    | 0 |
| NR_033780 | 2810001G20Rik | 0 |
| NR_033782 | 4921531C22Rik | 0 |
| NR_033783 | 4933429019Rik | 0 |
| NR_033784 | 1700041C23Rik | 0 |
| NR_033785 | 1700044K03Rik | 0 |
| NR_033803 | 6030408B16Rik | 0 |
| NR_034043 | Snora47       | 0 |
| NR_034044 | Snora36b      | 0 |
| NR_034045 | Snora30       | 0 |
| NR_034046 | Snora61       | 0 |
| NR_034048 | Snora81       | 0 |
| NR_034049 | Snora52       | 0 |
| NR_034050 | Snora44       | 0 |
| NR_034074 | Etd           | 0 |
| NR_035406 | Mir467a-1     | 0 |
| NR_035407 | Mir1224       | 0 |
| NR_035408 | Mir669a-1     | 0 |
| NR_035410 | Mir669k       | 0 |
| NR_035411 | Mir669g       | 0 |
| NR_035412 | Mir466i       | 0 |
| NR_035413 | Mir1-2as      | 0 |
| NR_035414 | Mir1186       | 0 |
| NR_035416 | Mir669j       | 0 |
| NR_035417 | Mir669i       | 0 |
| NR_035418 | Mir669h       | 0 |
| NR_035419 | Mir1188       | 0 |
| NR_035420 | Mir467f       | 0 |
| NR_035421 | Mir1190       | 0 |
| NR_035423 | Mir1192       | 0 |
| NR_035424 | Mir1193       | 0 |
| NR_035428 | Mir1196       | 0 |
| NR_035429 | Mir1197       | 0 |
| NR_035433 | Mir1897       | 0 |
| NR_035434 | Mir1905       | 0 |
| NR_035436 | Mir1903       | 0 |
| NR_035437 | Mir1899       | 0 |
| NR_035441 | Mir1896       | 0 |
| NR_035442 | Mir1904       | 0 |
| NR_035443 | Mir1898       | 0 |
| NR_035445 | Mir1894       | 0 |
| NR_035447 | Mir1901       | 0 |
| NR_035450 | Mir1929       | 0 |
| NR_035451 | Mir1930       | 0 |
| NR_035452 | Mir1931       | 0 |
| NR_035453 | Mir1932       | 0 |
| NR_035455 | Mir1934       | 0 |
| NR_035458 | Mir1937a      | 0 |
| NR_035461 | Mir1940       | 0 |
| NR_035462 | Mir1941       | 0 |
| NR_035465 | Mir1944       | 0 |
| NR_035469 | Mir1947       | 0 |
| NR_035471 | Mir1948       | 0 |
| NR_035472 | Mir1949       | 0 |

|           |               |   |
|-----------|---------------|---|
| NR_035476 | Mir1951       | 0 |
| NR_035477 | Mir1952       | 0 |
| NR_035480 | Mir1955       | 0 |
| NR_035481 | Mir1956       | 0 |
| NR_035486 | Mir1960       | 0 |
| NR_035488 | Mir1962       | 0 |
| NR_035490 | Mir1964       | 0 |
| NR_035491 | Mir1965       | 0 |
| NR_035492 | Mir1966       | 0 |
| NR_035493 | Mir1967       | 0 |
| NR_035494 | Mir1968       | 0 |
| NR_035495 | Mir1969       | 0 |
| NR_035501 | Mir1839       | 0 |
| NR_035503 | Mir1982       | 0 |
| NR_035516 | Mir2136       | 0 |
| NR_035517 | Mir2137       | 0 |
| NR_035523 | Mir2145-2     | 0 |
| NR_035526 | Mir432        | 0 |
| NR_035529 | Mir664        | 0 |
| NR_036449 | Gm5084        | 0 |
| NR_036450 | Gm14403       | 0 |
| NR_036451 | Gm4814        | 0 |
| NR_036452 | E230016K23Rik | 0 |
| NR_036606 | 1700060C20Rik | 0 |
| NR_036607 | Gm3086        | 0 |
| NR_036629 | Efcab8        | 0 |
| NR_036630 | Gm1082        | 0 |
| NR_036654 | Gm6525        | 0 |
| NR_036696 | Gm8579        | 0 |
| NR_037189 | Gm9696        | 0 |
| NR_037190 | Gm9855        | 0 |
| NR_037204 | Mir1247       | 0 |
| NR_037205 | Mir1264       | 0 |
| NR_037208 | Mir3475       | 0 |
| NR_037210 | Mir1298       | 0 |
| NR_037211 | Mir3059       | 0 |
| NR_037213 | Mir3099       | 0 |
| NR_037218 | Mir3057       | 0 |
| NR_037220 | Mir3060       | 0 |
| NR_037221 | Mir3061       | 0 |
| NR_037225 | Mir3065       | 0 |
| NR_037226 | Mir3066       | 0 |
| NR_037227 | Mir3067       | 0 |
| NR_037230 | Mir3070a      | 0 |
| NR_037231 | Mir3070b      | 0 |
| NR_037232 | Mir3071       | 0 |
| NR_037233 | Mir3072       | 0 |
| NR_037234 | Mir3073       | 0 |
| NR_037236 | Mir3075       | 0 |
| NR_037238 | Mir3077       | 0 |
| NR_037239 | Mir3078       | 0 |
| NR_037246 | Mir3085       | 0 |
| NR_037248 | Mir4660       | 0 |
| NR_037249 | Mir467a-2     | 0 |

|           |               |   |
|-----------|---------------|---|
| NR_037250 | Mir669a-4     | 0 |
| NR_037251 | Mir669a-5     | 0 |
| NR_037252 | Mir467a-3     | 0 |
| NR_037253 | Mir669a-6     | 0 |
| NR_037254 | Mir467a-4     | 0 |
| NR_037255 | Mir669a-7     | 0 |
| NR_037256 | Mir467a-5     | 0 |
| NR_037257 | Mir699p-1     | 0 |
| NR_037258 | Mir467a-6     | 0 |
| NR_037259 | Mir669a-8     | 0 |
| NR_037260 | Mir669a-9     | 0 |
| NR_037261 | Mir467a-7     | 0 |
| NR_037262 | Mir669p-2     | 0 |
| NR_037263 | Mir467a-8     | 0 |
| NR_037264 | Mir669a-10    | 0 |
| NR_037265 | Mir467a-9     | 0 |
| NR_037266 | Mir669a-11    | 0 |
| NR_037267 | Mir467a-10    | 0 |
| NR_037268 | Mir669a-12    | 0 |
| NR_037270 | Mir3087       | 0 |
| NR_037271 | Mir3088       | 0 |
| NR_037272 | Mir3089       | 0 |
| NR_037274 | Mir3091       | 0 |
| NR_037276 | Mir3093       | 0 |
| NR_037277 | Mir3094       | 0 |
| NR_037279 | Mir3096       | 0 |
| NR_037280 | Mir3097       | 0 |
| NR_037282 | Mir3100       | 0 |
| NR_037285 | Mir344b       | 0 |
| NR_037289 | Mir3102       | 0 |
| NR_037293 | Mir3107       | 0 |
| NR_037295 | Mir3108       | 0 |
| NR_037296 | Mir3109       | 0 |
| NR_037297 | Mir3110       | 0 |
| NR_037298 | Mir374c       | 0 |
| NR_037299 | Mir3112       | 0 |
| NR_037300 | Mir1912       | 0 |
| NR_037303 | Mir1937b-2    | 0 |
| NR_037307 | Mir1937b-4    | 0 |
| NR_037308 | Mir1937b-5    | 0 |
| NR_037310 | Mir1186b      | 0 |
| NR_037312 | Mir3474       | 0 |
| NR_037571 | Gm7056        | 0 |
| NR_037588 | B930003M22Rik | 0 |
| NR_037604 | Rdh18-ps      | 0 |
| NR_037679 | 5330439B14Rik | 0 |
| NR_037682 | Snord42a      | 0 |
| NR_037692 | 4933407L21Rik | 0 |
| NR_037697 | 1500009C09Rik | 0 |
| NR_037700 | Gm2049        | 0 |
| NR_037955 | 1190002F15Rik | 0 |
| NR_037957 | 1300002E11Rik | 0 |
| NR_037960 | 1600020E01Rik | 0 |
| NR_037971 | LOC100503197  | 0 |

|           |               |   |
|-----------|---------------|---|
| NR_037977 | Gm53          | 0 |
| NR_037986 | LOC100503474  | 0 |
| NR_037989 | LOC100504525  | 0 |
| NR_037991 | Gm2762        | 0 |
| NR_037998 | D030040B21Rik | 0 |
| NR_038000 | 4921513I03Rik | 0 |
| NR_038001 | 1700027A15Rik | 0 |
| NR_038005 | 4933413J09Rik | 0 |
| NR_038008 | AI848258      | 0 |
| NR_038010 | 5530401A14Rik | 0 |
| NR_038011 | C730036E19Rik | 0 |
| NR_038012 | LOC620079     | 0 |
| NR_038014 | LOC432488     | 0 |
| NR_038015 | LOC100502820  | 0 |
| NR_038016 | LOC100502920  | 0 |
| NR_038019 | LOC100504202  | 0 |
| NR_038021 | LOC100504265  | 0 |
| NR_038023 | LOC100504616  | 0 |
| NR_038024 | 4930486F22Rik | 0 |
| NR_038025 | 4933412E12Rik | 0 |
| NR_038032 | 9330159K06    | 0 |
| NR_038036 | Gm6150        | 0 |
| NR_038038 | 2210417K05Rik | 0 |
| NR_038041 | 2310015B20Rik | 0 |
| NR_038042 | 1700028I16Rik | 0 |
| NR_038045 | Gm10440       | 0 |
| NR_038047 | D130020L05Rik | 0 |
| NR_038053 | 4930579G18Rik | 0 |
| NR_038057 | 1500016L03Rik | 0 |
| NR_038058 | C030037D09Rik | 0 |
| NR_038059 | 1700110I01Rik | 0 |
| NR_038065 | Zfp133-ps     | 0 |
| NR_038067 | Gm2011        | 0 |
| NR_038073 | Snhg4         | 0 |
| NR_038079 | Gm2447        | 0 |
| NR_038091 | A730098P11Rik | 0 |
| NR_038100 | 0lfr230-ps1   | 0 |
| NR_038101 | Gm14327       | 0 |
| NR_038124 | BB283400      | 0 |
| NR_038136 | 1810007D17Rik | 0 |
| NR_038140 | 1810018F18Rik | 0 |
| NR_038149 | 1700016P04Rik | 0 |
| NR_038151 | 2410004N09Rik | 0 |
